# Supplementary material for: Establishing the Proteome of Normal Human Cerebrospinal Fluid
Source: PubMed Central journal article supplement (PMC2881861; doi:10.1371/journal.pone.0010980), 2010-06-11
Supplement: pone.0010980.s008.pdf [file pone.0010980.s008.pdf]

| Supplementary Table 1. Peptides detected in CSF from healthy normal individuals using immunoaffinity depletion and 2D-LC-MS/MS. |                                                                  |                                              |              |       |         |                  |
|---------------------------------------------------------------------------------------------------------------------------------|------------------------------------------------------------------|----------------------------------------------|--------------|-------|---------|------------------|
| IPI                                                                                                                             | Protein name                                                     | Peptide Sequence                             | Charge State | XCorr | DeltaCn | Mass Error (ppm) |
| IPI00000027                                                                                                                     | Pituitary adenylate cyclase-activating polypeptide precursor     | R.FPGIRPEEEAYGEDGNPLPDFDGSEPPGAGSPASAPR.A    | 4            | 3.89  | 0.30    | -1.67            |
| IPI00000044                                                                                                                     | Platelet-derived growth factor B chain precursor                 | A.EGDPIPEELYEM* LSDHSIR.S                    | 2            | 3.62  | 0.49    | -2.66            |
| IPI00000044                                                                                                                     | Platelet-derived growth factor B chain precursor                 | R.SFDDLQR.L                                  | 1            | 1.69  | 0.06    | -3.38            |
| IPI00000044                                                                                                                     | Platelet-derived growth factor B chain precursor                 | R.SHSGGELESLAR.G                             | 1            | 2.84  | 0.27    | -3.62            |
| IPI00000044                                                                                                                     | Platelet-derived growth factor B chain precursor                 | R.SHSGGELESLAR.G                             | 2            | 2.93  | 0.42    | -1.85            |
| IPI00000044                                                                                                                     | Platelet-derived growth factor B chain precursor                 | R.SHSGGELESLAR.G                             | 3            | 2.51  | 0.07    | -3.61            |
| IPI00000070                                                                                                                     | Low-density lipoprotein receptor precursor                       | R.NEFQCQDGK.C                                | 2            | 2.52  | 0.25    | -3.05            |
| IPI00000076                                                                                                                     | Beta-nerve growth factor precursor                               | R.SAPAAAIAAR.V                               | 2            | 2.33  | 0.15    | 0.10             |
| IPI00000087                                                                                                                     | Sodium channel subunit beta-2 precursor                          | K.YDVSVM*LR.N                                | 2            | 2.56  | 0.22    | -2.01            |
| IPI00000087                                                                                                                     | Sodium channel subunit beta-2 precursor                          | R.NVQPEDEGIYNCYIM* NPPDR.H                   | 2            | 4.83  | 0.57    | -4.61            |
| IPI00000104                                                                                                                     | Isoform 1 of mRNA-capping enzyme                                 | R.WLNCPR.R                                   | 2            | 1.52  | 0.21    |                  |
| IPI00000130                                                                                                                     | Somatostatin precursor                                           | A.ELLSEPNQTENDALEPEDLSQAAEQDEM* RLELQR.S     | 3            | 3.94  | 0.32    | -3.54            |
| IPI00000130                                                                                                                     | Somatostatin precursor                                           | E.LLSEPNQTENDALEPEDLSQAAEQDEM* RLELQR.S      | 3            | 4.91  | 0.48    | 0.32             |
| IPI00000130                                                                                                                     | Somatostatin precursor                                           | F.LAELLSEPNQTENDALEPEDLSQAAEQDEM* RLELQR.S   | 3            | 4.20  | 0.43    | -3.19            |
| IPI00000130                                                                                                                     | Somatostatin precursor                                           | K.SLAAAAGK.Q                                 | 1            | 1.90  | 0.20    | -1.34            |
| IPI00000130                                                                                                                     | Somatostatin precursor                                           | K.SLAAAAGKQELAK.Y                            | 2            | 3.06  | 0.25    | -0.59            |
| IPI00000130                                                                                                                     | Somatostatin precursor                                           | K.YFLAELLSEPNQTENDALEPEDLSQAAEQDEM* RLELQR.S | 3            | 4.57  | 0.43    | -3.87            |
| IPI00000130                                                                                                                     | Somatostatin precursor                                           | K.YFLAELLSEPNQTENDALEPEDLSQAAEQDEM* RLELQR.S | 4            | 5.10  | 0.44    | -4.13            |
| IPI00000130                                                                                                                     | Somatostatin precursor                                           | L.AELLSEPNQTENDALEPEDLSQAAEQDEM* RLELQR.S    | 3            | 4.63  | 0.51    | -2.19            |
| IPI00000130                                                                                                                     | Somatostatin precursor                                           | L.LSEPNQTENDALEPEDLSQAAEQDEM* R.L            | 3            | 4.96  | 0.52    | -1.84            |
| IPI00000130                                                                                                                     | Somatostatin precursor                                           | L.LSEPNQTENDALEPEDLSQAAEQDEM* RLELQR.S       | 3            | 4.31  | 0.48    | -3.33            |
| IPI00000130                                                                                                                     | Somatostatin precursor                                           | L.SEPNQTENDALEPEDLSQAAEQDEM* RLELQR.S        | 3            | 4.67  | 0.51    | -1.17            |
| IPI00000130                                                                                                                     | Somatostatin precursor                                           | R.SANSPAM* APR.E                             | 2            | 3.50  | 0.24    | -3.09            |
| IPI00000130                                                                                                                     | Somatostatin precursor                                           | R.SANSPAM* APRE.R                            | 2            | 3.34  | 0.36    | -3.26            |
| IPI00000130                                                                                                                     | Somatostatin precursor                                           | Y.FLAELLSEPNQTENDALEPEDLSQAAEQDEM* RLELQR.S  | 3            | 4.73  | 0.44    | -4.20            |
| IPI00000137                                                                                                                     | N-acetylglucosamine-1-phosphotransferase subunit gamma precursor | K.CFSLVESTYK.Y                               | 2            | 3.06  | 0.44    | -2.94            |
| IPI00000137                                                                                                                     | N-acetylglucosamine-1-phosphotransferase subunit gamma precursor | K.M*KVVEEPNAFGVNNPFLPQASR.L                  | 3            | 4.78  | 0.37    | -2.86            |
| IPI00000137                                                                                                                     | N-acetylglucosamine-1-phosphotransferase subunit gamma precursor | K.RDPSPVSGPVHLFR.L                           | 2            | 3.74  | 0.41    | -4.61            |
| IPI00000137                                                                                                                     | N-acetylglucosamine-1-phosphotransferase subunit gamma precursor | K.RDPSPVSGPVHLFR.L                           | 3            | 5.30  | 0.50    | -3.20            |
| IPI00000137                                                                                                                     | N-acetylglucosamine-1-phosphotransferase subunit gamma precursor | K.TPEENPTQLEGGPDSLGFETLENCRK.A               | 3            | 4.56  | 0.43    | -2.36            |
| IPI00000137                                                                                                                     | N-acetylglucosamine-1-phosphotransferase subunit gamma precursor | K.VVEEPNAFGVNNPFLPQASR.L                     | 2            | 5.50  | 0.49    | -3.34            |

|             |                                                                                       |                                           |   |      |      |       |
|-------------|---------------------------------------------------------------------------------------|-------------------------------------------|---|------|------|-------|
| IPI00000137 | N-acetylglucosamine-1-phosphotransferase subunit gamma precursor                      | K.VVEEPNAFGVNNPFLPQASR.L                  | 3 | 2.68 | 0.14 | -3.04 |
| IPI00000137 | N-acetylglucosamine-1-phosphotransferase subunit gamma precursor                      | R.DPSPVSGPVHLFR.L                         | 2 | 2.53 | 0.20 | -3.16 |
| IPI00000137 | N-acetylglucosamine-1-phosphotransferase subunit gamma precursor                      | R.QWDQVEQDLADELITPQGHEK.L                 | 3 | 4.52 | 0.31 | -4.62 |
| IPI00000137 | N-acetylglucosamine-1-phosphotransferase subunit gamma precursor                      | R.TLFEDAGYLK.T                            | 2 | 2.64 | 0.11 | -2.98 |
| IPI00000137 | N-acetylglucosamine-1-phosphotransferase subunit gamma precursor                      | R.TLFEDAGYLKTPREENPTQLEGGPDSLGFETLENCRK.A | 4 | 5.04 | 0.37 | -2.69 |
| IPI00000138 | Alpha-1,3-mannosyl-glycoprotein 2-beta-N-acetylglucosaminyltransferase                | K.EQM*VDASRPELLYR.T                       | 3 | 2.41 | 0.14 | -0.64 |
| IPI00000138 | Alpha-1,3-mannosyl-glycoprotein 2-beta-N-acetylglucosaminyltransferase                | K.LNQQFVHFTQLDLSYLQR.E                    | 3 | 3.33 | 0.24 | -2.34 |
| IPI00000138 | Alpha-1,3-mannosyl-glycoprotein 2-beta-N-acetylglucosaminyltransferase                | R.FPAAVVVEDDLEVPDFFEYFR.A                 | 3 | 3.49 | 0.34 | -4.69 |
| IPI00000138 | Alpha-1,3-mannosyl-glycoprotein 2-beta-N-acetylglucosaminyltransferase                | R.GIVTFQFR.G                              | 2 | 2.68 | 0.25 | -1.50 |
| IPI00000138 | Alpha-1,3-mannosyl-glycoprotein 2-beta-N-acetylglucosaminyltransferase                | R.GLLQQIGDALSSQR.G                        | 2 | 3.72 | 0.41 | -5.25 |
| IPI00000138 | Alpha-1,3-mannosyl-glycoprotein 2-beta-N-acetylglucosaminyltransferase                | R.VYGAPQLQVEK.V                           | 2 | 3.02 | 0.17 | -3.78 |
| IPI00000138 | Alpha-1,3-mannosyl-glycoprotein 2-beta-N-acetylglucosaminyltransferase                | R.WALGQVFR.Q                              | 2 | 1.86 | 0.13 | -0.54 |
| IPI00000144 | Oxytocin-neurophysin 1 precursor                                                      | R.CFGPNICCAEELGCFVGTAEALR.C               | 2 | 5.44 | 0.57 | -2.33 |
| IPI00000144 | Oxytocin-neurophysin 1 precursor                                                      | R.CFGPNICCAEELGCFVGTAEALR.C               | 3 | 3.95 | 0.30 | -2.92 |
| IPI00000160 | Proopiomelanocortin preproprotein                                                     | R.LREGDGPDPADDGAGAQAADLEHSLLVAAEK.K       | 3 | 4.94 | 0.46 | -1.97 |
| IPI00000160 | Proopiomelanocortin preproprotein                                                     | R.LREGDGPDPADDGAGAQAADLEHSLLVAAEK.K       | 4 | 4.42 | 0.34 | -2.45 |
| IPI00000190 | CD81 antigen                                                                          | K.QFYDQALQQAVVDDANNK.A                    | 3 | 4.48 | 0.39 | -4.07 |
| IPI00000265 | Uncharacterized protein C10orf38 precursor                                            | R.ALRLPENTSYSDLTAFLLTAASSPSEVDSFPYLR.G    | 3 | 4.64 | 0.37 | -3.85 |
| IPI00000459 | Transmembrane gamma-carboxyglutamic acid protein 1 precursor                          | R.ANGFFEEIR.Q                             | 2 | 2.32 | 0.24 | -2.13 |
| IPI00000760 | N(G),N(G)-dimethylarginine dimethylaminohydrolase 2                                   | R.EFFVGLSK.W                              | 1 | 2.13 | 0.25 | -1.89 |
| IPI00000760 | N(G),N(G)-dimethylarginine dimethylaminohydrolase 2                                   | R.IVEIGDENATLDGTDVLTGR.E                  | 2 | 4.99 | 0.51 | -5.54 |
| IPI00000760 | N(G),N(G)-dimethylarginine dimethylaminohydrolase 2                                   | R.IVEIGDENATLDGTDVLTGR.E                  | 3 | 2.62 | 0.20 | -5.65 |
| IPI00000760 | N(G),N(G)-dimethylarginine dimethylaminohydrolase 2                                   | R.TVVAGSSDAAQK.A                          | 2 | 3.35 | 0.37 | -2.38 |
| IPI00000775 | Isoform 1 of Leucine-rich repeats and immunoglobulin-like domains protein 1 precursor | K.DGGTDFPAAR.E                            | 2 | 2.77 | 0.28 | -3.70 |

|             |                                                                                       |                                    |   |      |      |       |
|-------------|---------------------------------------------------------------------------------------|------------------------------------|---|------|------|-------|
| IPI00000775 | Isoform 1 of Leucine-rich repeats and immunoglobulin-like domains protein 1 precursor | K.DGGTDFPAARE.R                    | 2 | 3.04 | 0.33 | -4.68 |
| IPI00000779 | Isoform 1 of ADAM 22 precursor                                                        | C.GQAGDASLM*ELEK.R                 | 2 | 4.32 | 0.52 | -3.23 |
| IPI00000779 | Isoform 1 of ADAM 22 precursor                                                        | C.GQAGDASLM*ELEK.R.K               | 2 | 3.26 | 0.39 | -0.16 |
| IPI00000779 | Isoform 1 of ADAM 22 precursor                                                        | F.ILDVVLNHDLLSSEYIER.H             | 3 | 4.05 | 0.33 | -1.53 |
| IPI00000779 | Isoform 1 of ADAM 22 precursor                                                        | G.QAGDASLM*ELEK.R                  | 2 | 3.55 | 0.36 | -1.98 |
| IPI00000779 | Isoform 1 of ADAM 22 precursor                                                        | K.CTLTQDSQCSDGLCCK.K               | 2 | 5.15 | 0.57 | -5.19 |
| IPI00000779 | Isoform 1 of ADAM 22 precursor                                                        | K.FAISENPLITLR.E                   | 2 | 4.06 | 0.46 | -4.90 |
| IPI00000779 | Isoform 1 of ADAM 22 precursor                                                        | K.LNIEGTEK.G                       | 2 | 2.53 | 0.07 | -1.94 |
| IPI00000779 | Isoform 1 of ADAM 22 precursor                                                        | K.M*DGYS CDGVQGICFGGR.C            | 2 | 4.74 | 0.59 | -2.61 |
| IPI00000779 | Isoform 1 of ADAM 22 precursor                                                        | K.SPSSTGSIASSR.K                   | 2 | 3.83 | 0.45 | -2.01 |
| IPI00000779 | Isoform 1 of ADAM 22 precursor                                                        | K.SRLEFESLDDLPSEFQQVNITPSK.F       | 3 | 4.26 | 0.35 | -3.35 |
| IPI00000779 | Isoform 1 of ADAM 22 precursor                                                        | K.SVVNM*ADLIYKDLK.T                | 3 | 1.86 | 0.17 | -1.30 |
| IPI00000779 | Isoform 1 of ADAM 22 precursor                                                        | K.TDLM*AVTLAQSLAHNIGIISDK.R        | 2 | 5.35 | 0.52 | -3.26 |
| IPI00000779 | Isoform 1 of ADAM 22 precursor                                                        | K.TDLM*AVTLAQSLAHNIGIISDK.R        | 3 | 4.50 | 0.53 | -4.21 |
| IPI00000779 | Isoform 1 of ADAM 22 precursor                                                        | R.DVLCGYLLCTNIGNIPR.L              | 2 | 4.16 | 0.46 | -3.14 |
| IPI00000779 | Isoform 1 of ADAM 22 precursor                                                        | R.LFEFSLDDLPSEFQQVNITPSK.F         | 2 | 5.06 | 0.56 | -5.31 |
| IPI00000779 | Isoform 1 of ADAM 22 precursor                                                        | R.LFEFSLDDLPSEFQQVNITPSK.F         | 3 | 4.64 | 0.47 | -4.25 |
| IPI00000779 | Isoform 1 of ADAM 22 precursor                                                        | R.LSVVHTNTYAK.S                    | 1 | 2.89 | 0.40 | -0.32 |
| IPI00000779 | Isoform 1 of ADAM 22 precursor                                                        | R.LSVVHTNTYAK.S                    | 2 | 2.56 | 0.19 | -3.20 |
| IPI00000779 | Isoform 1 of ADAM 22 precursor                                                        | R.LSVVHTNTYAK.S                    | 3 | 2.21 | 0.28 | -1.27 |
| IPI00000779 | Isoform 1 of ADAM 22 precursor                                                        | R.NVEEETKYIELM*IVNDHLM*FKK.H       | 4 | 2.90 | 0.10 | -4.63 |
| IPI00000779 | Isoform 1 of ADAM 22 precursor                                                        | R.SGAAYIGGICSLK.G                  | 1 | 3.20 | 0.36 | -2.93 |
| IPI00000779 | Isoform 1 of ADAM 22 precursor                                                        | R.SGAAYIGGICSLK.G                  | 2 | 4.41 | 0.37 | -3.21 |
| IPI00000779 | Isoform 1 of ADAM 22 precursor                                                        | R.SGGEDESRHDALDTR.V                | 2 | 2.68 | 0.20 | -4.42 |
| IPI00000779 | Isoform 1 of ADAM 22 precursor                                                        | R.SGGEDESRHDALDTR.V                | 3 | 2.68 | 0.34 | -2.52 |
| IPI00000779 | Isoform 1 of ADAM 22 precursor                                                        | R.SGGEDESRHDALDTR.V                | 4 | 2.50 | 0.29 | -3.74 |
| IPI00000792 | Quinone oxidoreductase                                                                | R.KPLLPYTPGSDVAGVIEAVGDNASAFK.K    | 3 | 2.97 | 0.23 | -2.24 |
| IPI00000811 | Proteasome subunit beta type-6 precursor                                              | R.VTDKLTPIHDR.I                    | 3 | 2.79 | 0.21 |       |
| IPI00000816 | 14-3-3 protein epsilon                                                                | K.AAFDDAIAELDTLSEESYK.D            | 3 | 4.91 | 0.50 | -2.47 |
| IPI00000816 | 14-3-3 protein epsilon                                                                | K.AAFDDAIAELDTLSEESYKDSTLIM*QLLR.D | 3 | 5.76 | 0.54 | -4.57 |
| IPI00000816 | 14-3-3 protein epsilon                                                                | K.AAFDDAIAELDTLSEESYKDSTLIM*QLLR.D | 4 | 4.59 | 0.26 | -3.92 |
| IPI00000816 | 14-3-3 protein epsilon                                                                | K.AAFDDAIAELDTLSEESYKDSTLIM*QLLR.D | 3 | 4.26 | 0.41 |       |
| IPI00000816 | 14-3-3 protein epsilon                                                                | K.AASDIAM*TELPPTHPIR.L             | 2 | 3.03 | 0.14 | -0.15 |
| IPI00000816 | 14-3-3 protein epsilon                                                                | K.AASDIAM*TELPPTHPIR.L             | 3 | 2.92 | 0.28 | -1.03 |
| IPI00000816 | 14-3-3 protein epsilon                                                                | K.EAAENSLVAYK.A                    | 2 | 2.05 | 0.11 | -4.91 |
| IPI00000816 | 14-3-3 protein epsilon                                                                | K.HLIPAANTGESK.V                   | 2 | 2.17 | 0.14 | -0.49 |
| IPI00000816 | 14-3-3 protein epsilon                                                                | K.LICCDILDVLDKHLIPAANTGESK.V       | 4 | 2.96 | 0.22 | -2.29 |
| IPI00000816 | 14-3-3 protein epsilon                                                                | R.IISSIEQKEENKGGEDKLM              | 3 | 3.51 | 0.18 | -4.05 |
| IPI00000816 | 14-3-3 protein epsilon                                                                | R.NLLSVAYK.N                       | 1 | 1.68 | 0.08 | -2.46 |
| IPI00000816 | 14-3-3 protein epsilon                                                                | R.NLLSVAYK.N                       | 2 | 2.28 | 0.09 | -1.47 |
| IPI00000816 | 14-3-3 protein epsilon                                                                | R.YDEM*VESM*K.K                    | 2 | 3.00 | 0.36 | -2.18 |

|            |                                                    |                                     |   |      |      |       |
|------------|----------------------------------------------------|-------------------------------------|---|------|------|-------|
| IPI0000816 | 14-3-3 protein epsilon                             | R.YDEM*VESM*KK.V                    | 2 | 1.44 | 0.05 | -1.17 |
| IPI0000816 | 14-3-3 protein epsilon                             | R.YLAEFATGNDRK.E                    | 2 | 2.84 | 0.35 | -3.90 |
| IPI0000824 | Isoform A of NT-3 growth factor receptor precursor | K.LNSQNLVCINADGSQPLFR.M             | 2 | 4.03 | 0.46 | -4.22 |
| IPI0000824 | Isoform A of NT-3 growth factor receptor precursor | K.LNSQNLVCINADGSQPLFR.M             | 3 | 4.07 | 0.29 | -5.38 |
| IPI0000824 | Isoform A of NT-3 growth factor receptor precursor | R.SLHTLNAVDM*ELYTGLQK.L             | 3 | 3.50 | 0.18 | -2.40 |
| IPI0000824 | Isoform A of NT-3 growth factor receptor precursor | R.VVSLEEPELR.L                      | 2 | 2.72 | 0.12 | -3.69 |
| IPI0000824 | Isoform A of NT-3 growth factor receptor precursor | R.WM*QLWQEQQEAK.L                   | 2 | 4.26 | 0.40 | -4.42 |
| IPI0000828 | Proenkephalin A precursor                          | A.EEDDSLANSDDLK.E                   | 2 | 4.90 | 0.39 | -1.97 |
| IPI0000828 | Proenkephalin A precursor                          | D.AEEDDSLANSDDLK.E                  | 2 | 6.33 | 0.48 | -4.00 |
| IPI0000828 | Proenkephalin A precursor                          | D.AEEDDSLANSDDLKELLETDGDNR.E        | 2 | 5.00 | 0.52 | -2.99 |
| IPI0000828 | Proenkephalin A precursor                          | D.AEEDDSLANSDDLKELLETDGDNR.E        | 3 | 5.58 | 0.52 | -4.56 |
| IPI0000828 | Proenkephalin A precursor                          | D.AEEDDSLANSDDLKELLETDGDNRER.S      | 3 | 5.56 | 0.49 | -4.29 |
| IPI0000828 | Proenkephalin A precursor                          | E.DDSLANSDDLK.E                     | 2 | 3.65 | 0.31 | -3.02 |
| IPI0000828 | Proenkephalin A precursor                          | E.EDDSLANSDDLK.E                    | 2 | 4.34 | 0.40 | -4.10 |
| IPI0000828 | Proenkephalin A precursor                          | E.LYPM*EPEEEANGSEILAK.R             | 2 | 4.65 | 0.46 | -4.75 |
| IPI0000828 | Proenkephalin A precursor                          | K.DAEEDDSLANSDDLK.E                 | 2 | 6.38 | 0.47 | -4.28 |
| IPI0000828 | Proenkephalin A precursor                          | K.DAEEDDSLANSDDLK.E                 | 3 | 3.48 | 0.07 | 0.38  |
| IPI0000828 | Proenkephalin A precursor                          | K.DAEEDDSLANSDDLKELLETDGDNR.E       | 2 | 4.56 | 0.51 | -4.41 |
| IPI0000828 | Proenkephalin A precursor                          | K.DAEEDDSLANSDDLKELLETDGDNR.E       | 3 | 5.50 | 0.52 | -5.37 |
| IPI0000828 | Proenkephalin A precursor                          | K.DAEEDDSLANSDDLKELLETDGDNRE.R      | 3 | 4.03 | 0.46 | -8.02 |
| IPI0000828 | Proenkephalin A precursor                          | K.DAEEDDSLANSDDLKELLETDGDNRER.S     | 2 | 2.50 | 0.23 | -3.66 |
| IPI0000828 | Proenkephalin A precursor                          | K.DAEEDDSLANSDDLKELLETDGDNRER.S     | 3 | 7.29 | 0.52 | -6.76 |
| IPI0000828 | Proenkephalin A precursor                          | K.DAEEDDSLANSDDLKELLETDGDNRER.S     | 4 | 3.57 | 0.36 | -4.50 |
| IPI0000828 | Proenkephalin A precursor                          | K.ELLETDGDNR.E                      | 1 | 1.92 | 0.09 | -3.74 |
| IPI0000828 | Proenkephalin A precursor                          | K.ELLQLSKPELPQDGTST.L               | 2 | 3.42 | 0.40 | -2.86 |
| IPI0000828 | Proenkephalin A precursor                          | K.ELLQLSKPELPQDGTSTLR.E             | 2 | 4.29 | 0.46 | -4.30 |
| IPI0000828 | Proenkephalin A precursor                          | K.ELLQLSKPELPQDGTSTLR.E             | 3 | 4.81 | 0.44 | -3.78 |
| IPI0000828 | Proenkephalin A precursor                          | K.ELLQLSKPELPQDGTSTLRENSKPEESHLL.A  | 3 | 4.96 | 0.48 | -3.73 |
| IPI0000828 | Proenkephalin A precursor                          | K.ELLQLSKPELPQDGTSTLRENSKPEESHLLA.K | 3 | 4.89 | 0.43 | -3.81 |
| IPI0000828 | Proenkephalin A precursor                          | K.ELLQLSKPELPQDGTSTLRENSKPEESHLLA.K | 4 | 5.23 | 0.41 | -2.89 |
| IPI0000828 | Proenkephalin A precursor                          | K.IWETCKELLQLSKPELPQDGTSTLR.E       | 3 | 5.01 | 0.49 | -2.97 |
| IPI0000828 | Proenkephalin A precursor                          | K.IWETCKELLQLSKPELPQDGTSTLR.E       | 4 | 3.38 | 0.22 | -3.91 |
| IPI0000828 | Proenkephalin A precursor                          | K.KDAEEDDSLANSDDLK.E                | 2 | 5.64 | 0.45 | -2.61 |
| IPI0000828 | Proenkephalin A precursor                          | K.KDAEEDDSLANSDDLKELLETDGDNR.E      | 3 | 5.78 | 0.54 | -3.53 |
| IPI0000828 | Proenkephalin A precursor                          | K.KDAEEDDSLANSDDLKELLETDGDNR.E      | 4 | 3.02 | 0.14 | -2.50 |
| IPI0000828 | Proenkephalin A precursor                          | K.KDAEEDDSLANSDDLKELLETDGDNRER.S    | 4 | 5.14 | 0.44 | -4.13 |
| IPI0000828 | Proenkephalin A precursor                          | K.KDAEEDDSLANSDDLKELLETDGDNRER.S    | 5 | 3.70 | 0.24 | -2.86 |

|             |                                          |                                          |   |      |      |       |
|-------------|------------------------------------------|------------------------------------------|---|------|------|-------|
| IPI00000828 | Proenkephalin A precursor                | K.KM*DELYPM*EPEEEANGSEILAK.R             | 3 | 3.73 | 0.34 | -1.62 |
| IPI00000828 | Proenkephalin A precursor                | R.ENSKPEESHLLA.K                         | 2 | 3.02 | 0.30 | -2.68 |
| IPI00000828 | Proenkephalin A precursor                | R.FAEALPSDEEGESYSK.E                     | 2 | 4.23 | 0.42 | -4.07 |
| IPI00000828 | Proenkephalin A precursor                | R.FAEALPSDEEGESYSKEVPEM*E.K              | 2 | 4.49 | 0.59 | -3.18 |
| IPI00000828 | Proenkephalin A precursor                | R.LVRPADINFLACVM*ECEGK.L                 | 2 | 3.09 | 0.39 | -5.58 |
| IPI00000828 | Proenkephalin A precursor                | R.LVRPADINFLACVM*ECEGK.L                 | 3 | 4.55 | 0.40 | -3.97 |
| IPI00000828 | Proenkephalin A precursor                | R.LVRPADINFLACVM*ECEGKLPSLK.I            | 3 | 5.82 | 0.55 | -5.55 |
| IPI00000828 | Proenkephalin A precursor                | R.LVRPADINFLACVM*ECEGKLPSLK.I            | 4 | 5.27 | 0.45 | -4.46 |
| IPI00000832 | Beta-neoendorphin-dynorphin precursor    | K.SVGEGPYSELA.L                          | 2 | 2.60 | 0.27 | -2.42 |
| IPI00000832 | Beta-neoendorphin-dynorphin precursor    | K.TQDGPKPINPLICSLQCQAALLPSEEWER.C        | 3 | 3.97 | 0.30 | -3.45 |
| IPI00000832 | Beta-neoendorphin-dynorphin precursor    | R.GLSDGFREGAESELM*R.D                    | 2 | 1.81 | 0.11 | -3.38 |
| IPI00000871 | Prolactin                                | R.DSHKIDNYLK.L                           | 2 | 2.49 | 0.17 | -2.60 |
| IPI00000871 | Prolactin                                | R.DSHKIDNYLK.L                           | 3 | 2.27 | 0.17 | -3.82 |
| IPI00000871 | Prolactin                                | R.LLEGM*ELIVSQVHPETK.E                   | 3 | 2.99 | 0.24 | -2.67 |
| IPI00000874 | Peroxiredoxin-1                          | K.ATAVM*PDGQFK.D                         | 2 | 2.20 | 0.23 | -2.76 |
| IPI00000874 | Peroxiredoxin-1                          | K.ATAVM*PDGQFKDISLSDYK.G                 | 2 | 4.93 | 0.51 | -1.66 |
| IPI00000874 | Peroxiredoxin-1                          | K.ATAVM*PDGQFKDISLSDYK.G                 | 3 | 2.78 | 0.43 | -2.28 |
| IPI00000874 | Peroxiredoxin-1                          | K.IGHPAPNFK.A                            | 1 | 2.29 | 0.22 | -4.10 |
| IPI00000874 | Peroxiredoxin-1                          | K.IGHPAPNFK.A                            | 2 | 1.77 | 0.10 | -2.72 |
| IPI00000874 | Peroxiredoxin-1                          | R.GLFIIDDKGILR.Q                         | 2 | 3.71 | 0.33 | -2.33 |
| IPI00000874 | Peroxiredoxin-1                          | R.LVQAFQFTDK.H                           | 2 | 3.24 | 0.32 | -0.52 |
| IPI00000874 | Peroxiredoxin-1                          | R.QITVNDLPVGR.S                          | 1 | 1.08 | 0.06 | -3.33 |
| IPI00000874 | Peroxiredoxin-1                          | R.QITVNDLPVGR.S                          | 2 | 2.78 | 0.29 | -3.36 |
| IPI00000874 | Peroxiredoxin-1                          | R.TIAQDYGVLK.A                           | 2 | 1.97 | 0.06 | -7.57 |
| IPI00000874 | Peroxiredoxin-1                          | R.TIAQDYGVLK.ADEGISFR.G                  | 3 | 2.49 | 0.22 | -1.44 |
| IPI00000874 | Peroxiredoxin-1                          | W.KPGSDTIKPDVQK.S                        | 2 | 3.57 | 0.32 | -2.99 |
| IPI00000877 | Hypoxia up-regulated protein 1 precursor | K.AANSLEAFIFETQDK.L                      | 2 | 4.59 | 0.46 | -2.99 |
| IPI00000877 | Hypoxia up-regulated protein 1 precursor | K.AANSLEAFIFETQDK.L                      | 3 | 2.90 | 0.11 | -3.03 |
| IPI00000877 | Hypoxia up-regulated protein 1 precursor | K.AANSLEAFIFETQDKLYQPEYQEVSTEEQREEISGK.L | 3 | 5.32 | 0.54 | -0.11 |
| IPI00000877 | Hypoxia up-regulated protein 1 precursor | K.AANSLEAFIFETQDKLYQPEYQEVSTEEQREEISGK.L | 4 | 3.99 | 0.31 | -2.95 |
| IPI00000877 | Hypoxia up-regulated protein 1 precursor | K.AEAGPEGVAPAPEGEKK.Q                    | 2 | 3.98 | 0.47 | -2.89 |
| IPI00000877 | Hypoxia up-regulated protein 1 precursor | K.LCQGLFFR.V                             | 2 | 2.97 | 0.21 | -1.20 |
| IPI00000877 | Hypoxia up-regulated protein 1 precursor | K.LPATEKPVLLSK.D                         | 2 | 3.62 | 0.51 | -3.61 |
| IPI00000877 | Hypoxia up-regulated protein 1 precursor | K.LPATEKPVLLSK.D                         | 3 | 2.09 | 0.17 | -3.90 |
| IPI00000877 | Hypoxia up-regulated protein 1 precursor | K.LQDLTLR.D                              | 2 | 2.33 | 0.09 | -3.01 |
| IPI00000877 | Hypoxia up-regulated protein 1 precursor | K.LQDLTLRDLEK.Q                          | 2 | 3.13 | 0.17 | -1.24 |
| IPI00000877 | Hypoxia up-regulated protein 1 precursor | K.LQDLTLRDLEKQER.E                       | 3 | 2.92 | 0.06 | -2.69 |
| IPI00000877 | Hypoxia up-regulated protein 1 precursor | K.LQDLTLRDLEKQEREK.A                     | 3 | 3.81 | 0.18 | -3.14 |
| IPI00000877 | Hypoxia up-regulated protein 1 precursor | K.M*M*ALDREVQYLLNK.A                     | 2 | 2.59 | 0.11 | -3.06 |
| IPI00000877 | Hypoxia up-regulated protein 1 precursor | K.M*M*ALDREVQYLLNK.A                     | 3 | 3.09 | 0.16 | -4.99 |
| IPI00000877 | Hypoxia up-regulated protein 1 precursor | R.LIPEM*DQIFTEVEM*TTLEK.V                | 3 | 4.74 | 0.36 | -5.01 |
| IPI00000914 | Isoform 1 of Calcitonin precursor        | R.LLLAALVQDYVQM*K.A                      | 2 | 4.72 | 0.45 | -3.61 |

|             |                                                                                         |                                                |   |      |      |       |
|-------------|-----------------------------------------------------------------------------------------|------------------------------------------------|---|------|------|-------|
| IPI00000914 | Isoform 1 of Calcitonin precursor                                                       | R.LLLAALVQDYVQM*K.A                            | 3 | 5.28 | 0.48 | -4.39 |
| IPI00000914 | Isoform 1 of Calcitonin precursor                                                       | R.SALESSPADPATLSEDEAR.L                        | 2 | 5.05 | 0.57 | -4.14 |
| IPI00000959 | Isoform 1 of VIP peptides precursor                                                     | R.LGDRIPFEGANEPDQVSLKEDIDM*LQNALAENDTPYYDVSR.N | 4 | 3.90 | 0.26 | -3.49 |
| IPI00000977 | Mitogen-activated protein kinase kinase kinase 11                                       | R.EWHKTTQM*SAAGTYAWMAPEVIK.A                   | 3 | 3.33 | 0.06 |       |
| IPI00001120 | CDNA FLJ31810 fis, clone NT2RI2009289, weakly similar to CARBOXYPEPTIDASE N 83 KD CHAIN | K.SLEVGDNLDVYISHR.A                            | 2 | 4.25 | 0.45 | -2.84 |
| IPI00001120 | CDNA FLJ31810 fis, clone NT2RI2009289, weakly similar to CARBOXYPEPTIDASE N 83 KD CHAIN | K.SLEVGDNLDVYISHR.A                            | 3 | 2.69 | 0.07 | -2.25 |
| IPI00001120 | CDNA FLJ31810 fis, clone NT2RI2009289, weakly similar to CARBOXYPEPTIDASE N 83 KD CHAIN | R.LQELHIVGAQLR.T                               | 3 | 3.58 | 0.26 | -2.67 |
| IPI00001399 | Adherens junction-associated protein 1                                                  | K.AGLAKPPAAAK.S                                | 1 | 2.26 | 0.33 | -2.07 |
| IPI00001399 | Adherens junction-associated protein 1                                                  | K.AGLAKPPAAAK.S                                | 2 | 3.03 | 0.32 | -1.50 |
| IPI00001399 | Adherens junction-associated protein 1                                                  | K.SSPSLASSSSSSSSAVAGGAPEQQALLR.R               | 2 | 5.28 | 0.56 | -2.57 |
| IPI00001399 | Adherens junction-associated protein 1                                                  | K.SSPSLASSSSSSSSAVAGGAPEQQALLR.R               | 3 | 6.02 | 0.41 | -3.20 |
| IPI00001399 | Adherens junction-associated protein 1                                                  | K.SSPSLASSSSSSSSAVAGGAPEQQALLR.G               | 3 | 4.25 | 0.43 | -1.54 |
| IPI00001399 | Adherens junction-associated protein 1                                                  | R.DQAAALVPK.A                                  | 1 | 1.81 | 0.09 | -3.59 |
| IPI00001399 | Adherens junction-associated protein 1                                                  | R.DQAAALVPK.A                                  | 2 | 2.85 | 0.15 | -2.65 |
| IPI00001433 | Protocadherin beta 15 precursor                                                         | R.GSFVANLANDLGLGVGELAER.G                      | 2 | 3.40 | 0.43 | -2.53 |
| IPI00001434 | Protocadherin beta 14 precursor                                                         | R.DLGLGVEELSSR.E                               | 2 | 3.89 | 0.41 | -3.86 |
| IPI00001477 | Isoform 1 of Epithelial discoidin domain-containing receptor 1 precursor                | K.DLGPPM*VAR.L                                 | 2 | 1.84 | 0.11 | -1.96 |
| IPI00001477 | Isoform 1 of Epithelial discoidin domain-containing receptor 1 precursor                | K.DRWGQEVISGNEDPEGVVLK.D                       | 3 | 4.58 | 0.32 | -2.93 |
| IPI00001477 | Isoform 1 of Epithelial discoidin domain-containing receptor 1 precursor                | K.EEEYLQVDLQR.L                                | 2 | 3.90 | 0.33 | -1.17 |
| IPI00001477 | Isoform 1 of Epithelial discoidin domain-containing receptor 1 precursor                | K.GHFDPAK.C                                    | 1 | 1.61 | 0.09 | -1.96 |
| IPI00001477 | Isoform 1 of Epithelial discoidin domain-containing receptor 1 precursor                | R.AVSVPLGGR.V                                  | 1 | 1.58 | 0.23 | -2.63 |
| IPI00001477 | Isoform 1 of Epithelial discoidin domain-containing receptor 1 precursor                | R.AVSVPLGGR.V                                  | 2 | 2.36 | 0.18 | -3.22 |
| IPI00001477 | Isoform 1 of Epithelial discoidin domain-containing receptor 1 precursor                | R.LESSDGDGAWCPAGSVFPKEEEYLQVDLQR.L             | 3 | 5.60 | 0.52 | -5.34 |
| IPI00001477 | Isoform 1 of Epithelial discoidin domain-containing receptor 1 precursor                | R.VELYGCLWR.D                                  | 2 | 3.29 | 0.32 | -2.06 |
| IPI00001477 | Isoform 1 of Epithelial discoidin domain-containing receptor 1 precursor                | R.WGQEVISGNEDPEGVVLKDLGPPM*VAR.L               | 3 | 5.54 | 0.39 | -2.99 |
| IPI00001477 | Isoform 1 of Epithelial discoidin domain-containing receptor 1 precursor                | R.YALGM*QDR.T                                  | 2 | 2.34 | 0.25 | -0.97 |
| IPI00001506 | Neuropeptide Y precursor                                                                | P.SKPDNPGEDAPAEDM*AR.Y                         | 3 | 3.60 | 0.29 | -2.42 |
| IPI00001506 | Neuropeptide Y precursor                                                                | R.ESTENVPR.T                                   | 2 | 1.81 | 0.07 | -2.27 |
| IPI00001506 | Neuropeptide Y precursor                                                                | R.SSPETLISDLLM*R.E                             | 2 | 4.07 | 0.39 | -4.31 |

|             |                                                       |                                 |   |      |      |       |
|-------------|-------------------------------------------------------|---------------------------------|---|------|------|-------|
| IPI00001506 | Neuropeptide Y precursor                              | R.SSPETLISDLLM*R.E              | 3 | 3.93 | 0.32 | -2.24 |
| IPI00001506 | Neuropeptide Y precursor                              | S.PETLISDLLM*R.E                | 2 | 3.36 | 0.35 | -2.43 |
| IPI00001568 | Vacuolar proton pump subunit D                        | K.AVELLVELASLQTSFVTLDEAIK.I     | 2 | 4.45 | 0.50 | -3.46 |
| IPI00001568 | Vacuolar proton pump subunit D                        | K.AVELLVELASLQTSFVTLDEAIK.I     | 3 | 3.41 | 0.48 | -1.99 |
| IPI00001592 | Isoform 2 of Transmembrane glycoprotein NMB precursor | K.DVYVVTQIPVFVTM*FQK.N          | 2 | 4.09 | 0.49 | -4.64 |
| IPI00001592 | Isoform 2 of Transmembrane glycoprotein NMB precursor | K.DVYVVTQIPVFVTM*FQK.N          | 3 | 4.30 | 0.47 | -4.03 |
| IPI00001592 | Isoform 2 of Transmembrane glycoprotein NMB precursor | R.AYVPIAQVK.D                   | 2 | 2.08 | 0.18 | -1.39 |
| IPI00001593 | Lysosomal Pro-X carboxypeptidase precursor            | K.AM*LVFAEHR.Y                  | 2 | 2.73 | 0.26 | -3.39 |
| IPI00001593 | Lysosomal Pro-X carboxypeptidase precursor            | K.DITDTLVAVTISEGAHHLDLR.T       | 3 | 3.43 | 0.36 | -5.47 |
| IPI00001593 | Lysosomal Pro-X carboxypeptidase precursor            | K.DITDTLVAVTISEGAHHLDLR.T       | 4 | 2.48 | 0.16 | -3.06 |
| IPI00001593 | Lysosomal Pro-X carboxypeptidase precursor            | K.IVTTDFRK.S                    | 2 | 1.61 | 0.15 | -3.13 |
| IPI00001593 | Lysosomal Pro-X carboxypeptidase precursor            | K.NALDPM*SVLLAR.S               | 2 | 3.00 | 0.29 | -4.28 |
| IPI00001593 | Lysosomal Pro-X carboxypeptidase precursor            | K.VDHFGFNTVK.T                  | 1 | 3.09 | 0.37 | -4.27 |
| IPI00001593 | Lysosomal Pro-X carboxypeptidase precursor            | K.VDHFGFNTVK.T                  | 2 | 2.63 | 0.34 | -2.83 |
| IPI00001593 | Lysosomal Pro-X carboxypeptidase precursor            | K.VDHFGFNTVKTFNQR.Y             | 2 | 4.57 | 0.59 | -4.82 |
| IPI00001593 | Lysosomal Pro-X carboxypeptidase precursor            | R.ALGSLHLPNTPTSLPAVAK.N         | 2 | 2.82 | 0.31 | -3.87 |
| IPI00001593 | Lysosomal Pro-X carboxypeptidase precursor            | R.ALGSLHLPNTPTSLPAVAK.N         | 3 | 2.93 | 0.31 | -3.35 |
| IPI00001593 | Lysosomal Pro-X carboxypeptidase precursor            | R.DFYDSAGKQH.-                  | 2 | 2.49 | 0.34 | -2.29 |
| IPI00001593 | Lysosomal Pro-X carboxypeptidase precursor            | R.HLNFLTSEQALADFAELIK.H         | 2 | 6.98 | 0.61 | -4.90 |
| IPI00001593 | Lysosomal Pro-X carboxypeptidase precursor            | R.HLNFLTSEQALADFAELIK.H         | 3 | 3.18 | 0.20 | -3.86 |
| IPI00001593 | Lysosomal Pro-X carboxypeptidase precursor            | R.PSWITTM*YGGK.N                | 2 | 3.46 | 0.31 | -2.33 |
| IPI00001593 | Lysosomal Pro-X carboxypeptidase precursor            | R.SWDAINR.L                     | 2 | 2.73 | 0.08 | -2.38 |
| IPI00001593 | Lysosomal Pro-X carboxypeptidase precursor            | R.TKNALDPM*SVLLAR.S             | 2 | 4.46 | 0.43 | -2.47 |
| IPI00001593 | Lysosomal Pro-X carboxypeptidase precursor            | R.TKNALDPM*SVLLAR.S             | 3 | 4.94 | 0.28 | -2.36 |
| IPI00001593 | Lysosomal Pro-X carboxypeptidase precursor            | R.YYGESLPFGDNSFKDSR.H           | 2 | 4.74 | 0.51 | -1.76 |
| IPI00001593 | Lysosomal Pro-X carboxypeptidase precursor            | R.YYGESLPFGDNSFKDSR.H           | 3 | 3.29 | 0.36 | -2.89 |
| IPI00001610 | Insulin-like growth factor IA precursor               | A.GPETLCGAELVDALQFVCGDR.G       | 3 | 5.12 | 0.41 | -4.59 |
| IPI00001610 | Insulin-like growth factor IA precursor               | R.GFYFNKPTGYGSSSR.R             | 2 | 3.90 | 0.41 | -1.66 |
| IPI00001611 | Isoform 1 of Insulin-like growth factor II precursor  | A.AYRPSETLCGGELVDTLQFVCGDR.G    | 3 | 4.18 | 0.36 | -3.53 |
| IPI00001611 | Isoform 1 of Insulin-like growth factor II precursor  | A.YRPSETLCGGELVDTLQFVCGDR.G     | 3 | 5.05 | 0.48 | -2.46 |
| IPI00001611 | Isoform 1 of Insulin-like growth factor II precursor  | C.CIAAYRPSETLCGGELVDTLQFVCGDR.G | 3 | 4.21 | 0.45 | -3.76 |
| IPI00001611 | Isoform 1 of Insulin-like growth factor II precursor  | K.ELEAFREAK.R                   | 2 | 2.36 | 0.20 | -1.65 |
| IPI00001611 | Isoform 1 of Insulin-like growth factor II precursor  | K.FFQYDTWK.Q                    | 1 | 2.22 | 0.26 | -3.71 |
| IPI00001611 | Isoform 1 of Insulin-like growth factor II precursor  | K.FFQYDTWK.Q                    | 2 | 2.84 | 0.24 | -2.27 |
| IPI00001611 | Isoform 1 of Insulin-like growth factor II precursor  | R.GFYFSRPASR.V                  | 2 | 2.50 | 0.28 | -2.17 |
| IPI00001611 | Isoform 1 of Insulin-like growth factor II precursor  | R.GIVEECCFR.S                   | 1 | 2.21 | 0.24 | -3.35 |
| IPI00001611 | Isoform 1 of Insulin-like growth factor II precursor  | R.GIVEECCFR.S                   | 2 | 3.29 | 0.35 | -2.94 |
| IPI00001611 | Isoform 1 of Insulin-like growth factor II precursor  | R.SCDLALLETYCATPAK.S            | 2 | 4.76 | 0.50 | -3.80 |
| IPI00001611 | Isoform 1 of Insulin-like growth factor II precursor  | R.SCDLALLETYCATPAK.S            | 3 | 4.43 | 0.37 | -1.63 |

|             |                                                           |                              |   |      |      |       |
|-------------|-----------------------------------------------------------|------------------------------|---|------|------|-------|
| IPI00001611 | Isoform 1 of Insulin-like growth factor II precursor      | R.SCDLALLETYCATPAKSE.R       | 2 | 5.32 | 0.50 | -3.69 |
| IPI00001611 | Isoform 1 of Insulin-like growth factor II precursor      | R.SCDLALLETYCATPAKSE.R       | 3 | 5.26 | 0.47 | -2.88 |
| IPI00001633 | Leucine-rich repeat transmembrane protein FLRT2 precursor | R.AALAQLLK.L                 | 2 | 2.47 | 0.15 | -2.92 |
| IPI00001633 | Leucine-rich repeat transmembrane protein FLRT2 precursor | R.LYLQDNQINHIPLTAFSNLR.K     | 3 | 4.05 | 0.29 | -2.13 |
| IPI00001633 | Leucine-rich repeat transmembrane protein FLRT2 precursor | R.VLHLQENNIQTISR.A           | 2 | 2.60 | 0.11 | 0.69  |
| IPI00001662 | Opioid-binding protein/cell adhesion molecule precursor   | C.SALNDVAAPDVR.K             | 2 | 3.56 | 0.29 | -1.02 |
| IPI00001662 | Opioid-binding protein/cell adhesion molecule precursor   | E.GQGFVSEDEYLEISDIKR.D       | 2 | 4.68 | 0.45 | -1.65 |
| IPI00001662 | Opioid-binding protein/cell adhesion molecule precursor   | K.AM*DNVTVR.Q                | 2 | 3.03 | 0.16 | -2.98 |
| IPI00001662 | Opioid-binding protein/cell adhesion molecule precursor   | K.EGQGFVSEDEYLEISDIKR.D      | 2 | 4.48 | 0.30 | -3.76 |
| IPI00001662 | Opioid-binding protein/cell adhesion molecule precursor   | K.EGQGFVSEDEYLEISDIKR.D      | 3 | 2.15 | 0.18 | -2.54 |
| IPI00001662 | Opioid-binding protein/cell adhesion molecule precursor   | K.GILSCEASAVPM*AEFQWFK.E     | 2 | 3.74 | 0.44 | -4.73 |
| IPI00001662 | Opioid-binding protein/cell adhesion molecule precursor   | K.GILSCEASAVPM*AEFQWFK.E     | 3 | 3.30 | 0.31 | -3.44 |
| IPI00001662 | Opioid-binding protein/cell adhesion molecule precursor   | K.GILSCEASAVPM*AEFQWFKEETR.L | 3 | 4.61 | 0.50 | -2.93 |
| IPI00001662 | Opioid-binding protein/cell adhesion molecule precursor   | K.ITVNYPPYISK.A              | 1 | 2.52 | 0.26 | -2.98 |
| IPI00001662 | Opioid-binding protein/cell adhesion molecule precursor   | K.ITVNYPPYISK.A              | 2 | 3.77 | 0.29 | -3.61 |
| IPI00001662 | Opioid-binding protein/cell adhesion molecule precursor   | K.NTGVSVGQK.G                | 1 | 2.25 | 0.27 | -2.72 |
| IPI00001662 | Opioid-binding protein/cell adhesion molecule precursor   | K.NTGVSVGQK.G                | 2 | 2.55 | 0.30 | -2.41 |
| IPI00001662 | Opioid-binding protein/cell adhesion molecule precursor   | K.VKITVNYPPYISK.A            | 2 | 4.38 | 0.39 | -4.85 |
| IPI00001662 | Opioid-binding protein/cell adhesion molecule precursor   | K.VKITVNYPPYISK.A            | 3 | 1.79 | 0.16 | -2.98 |
| IPI00001662 | Opioid-binding protein/cell adhesion molecule precursor   | P.VRSGDATFPK.A               | 1 | 2.19 | 0.22 | -1.28 |
| IPI00001662 | Opioid-binding protein/cell adhesion molecule precursor   | R.DQSGEYECALNDVAAPDVR.K      | 2 | 5.21 | 0.36 |       |
| IPI00001662 | Opioid-binding protein/cell adhesion molecule precursor   | R.DQSGEYECALNDVAAPDVRK.V     | 2 | 4.93 | 0.50 | -2.45 |



|             |                                                                  |                                             |   |      |      |       |
|-------------|------------------------------------------------------------------|---------------------------------------------|---|------|------|-------|
| IPI00001662 | Opioid-binding protein/cell adhesion molecule precursor          | R.DQSGEYECALNDVAAPDVRK.V                    | 3 | 3.82 | 0.37 | -3.70 |
| IPI00001662 | Opioid-binding protein/cell adhesion molecule precursor          | R.LATGLDGM*R.I                              | 2 | 2.70 | 0.21 | -3.56 |
| IPI00001662 | Opioid-binding protein/cell adhesion molecule precursor          | R.LATGLDGM*RIENK.G                          | 2 | 3.03 | 0.15 | -2.65 |
| IPI00001662 | Opioid-binding protein/cell adhesion molecule precursor          | R.QGESATLR.C                                | 2 | 1.66 | 0.15 | -3.34 |
| IPI00001662 | Opioid-binding protein/cell adhesion molecule precursor          | R.SGDATFPK.A                                | 1 | 2.05 | 0.16 | -3.53 |
| IPI00001662 | Opioid-binding protein/cell adhesion molecule precursor          | R.SGDATFPK.A                                | 2 | 2.92 | 0.23 | -4.46 |
| IPI00001662 | Opioid-binding protein/cell adhesion molecule precursor          | R.STILYAGNDK.W                              | 1 | 2.48 | 0.29 | -2.46 |
| IPI00001662 | Opioid-binding protein/cell adhesion molecule precursor          | R.STILYAGNDK.W                              | 2 | 2.95 | 0.20 | -3.32 |
| IPI00001662 | Opioid-binding protein/cell adhesion molecule precursor          | R.STILYAGNDKWSIDPR.V                        | 2 | 3.22 | 0.34 | -1.49 |
| IPI00001662 | Opioid-binding protein/cell adhesion molecule precursor          | R.STILYAGNDKWSIDPR.V                        | 3 | 3.41 | 0.28 | -2.55 |
| IPI00001662 | Opioid-binding protein/cell adhesion molecule precursor          | R.VIILVNTPTQYSIM*IQNVVDVYDEGPYTCSVQTDNHPK.T | 3 | 5.71 | 0.50 | -2.87 |
| IPI00001662 | Opioid-binding protein/cell adhesion molecule precursor          | R.VIILVNTPTQYSIM*IQNVVDVYDEGPYTCSVQTDNHPK.T | 4 | 4.75 | 0.35 | -5.38 |
| IPI00001712 | Isoform 1 of Catenin alpha-3                                     | R.DQDADNLDRAAGAIRGRAAR.V                    | 2 | 2.88 | 0.08 | -1.10 |
| IPI00001734 | Isoform 1 of Phosphoserine aminotransferase                      | K.FGTINIVHPK.L                              | 2 | 2.28 | 0.25 | -3.33 |
| IPI00001734 | Isoform 1 of Phosphoserine aminotransferase                      | K.FGVIFAGAQK.N                              | 2 | 2.66 | 0.22 | -1.16 |
| IPI00001734 | Isoform 1 of Phosphoserine aminotransferase                      | K.GAVLVCDM*SSNFLSKPVDVSK.F                  | 3 | 3.83 | 0.42 | -1.18 |
| IPI00001734 | Isoform 1 of Phosphoserine aminotransferase                      | K.GVGSVLEM*SHR.S                            | 2 | 2.33 | 0.27 | -3.74 |
| IPI00001734 | Isoform 1 of Phosphoserine aminotransferase                      | K.IINNTENLVR.E                              | 2 | 3.10 | 0.26 | -1.96 |
| IPI00001734 | Isoform 1 of Phosphoserine aminotransferase                      | R.ASLYNAVTIEDVQK.L                          | 2 | 4.42 | 0.23 | -3.09 |
| IPI00001734 | Isoform 1 of Phosphoserine aminotransferase                      | R.IGNAKGDDALEKR.F                           | 2 | 3.64 | 0.26 | -1.15 |
| IPI00001755 | Glypican-6 precursor                                             | K.GFSLADIPYQEIAGEHLR.I                      | 2 | 3.68 | 0.35 | -1.23 |
| IPI00001755 | Glypican-6 precursor                                             | K.GFSLADIPYQEIAGEHLR.I                      | 3 | 3.17 | 0.32 | -1.99 |
| IPI00001786 | Isoform 2 of Ubiquitin carboxyl-terminal hydrolase 36            | K.GNDESAGLDRRGSSSSSPEHSASSDSTK.A            | 3 | 2.91 | 0.17 |       |
| IPI00001793 | Beta-1,3-N-acetylglucosaminyltransferase radical fringe          | R.LPDDCTVGYIVEGLLGAR.L                      | 3 | 2.69 | 0.25 | -4.54 |
| IPI00001796 | Tumor necrosis factor receptor superfamily, member 18 (Fragment) | R.LLLGTGDAR.C                               | 2 | 2.17 | 0.14 | -0.32 |
| IPI00001863 | Wnt inhibitory factor 1 precursor                                | R.YEASLIHALRPAGAQLR.Q                       | 3 | 2.18 | 0.28 | -2.33 |
| IPI00001869 | Pappalysin-1 precursor                                           | R.RDDELIK.S                                 | 2 | 2.13 | 0.07 | -7.73 |

|             |                                                    |                                   |   |      |      |       |
|-------------|----------------------------------------------------|-----------------------------------|---|------|------|-------|
| IPI00001872 | Isoform 1 of Protocadherin gamma C3 precursor      | R.AEFPSGSAPR.E                    | 2 | 2.12 | 0.15 | -1.17 |
| IPI00001872 | Isoform 1 of Protocadherin gamma C3 precursor      | R.GTSAGHLVSR.V                    | 2 | 2.93 | 0.29 | -2.88 |
| IPI00001893 | Isoform A of Protocadherin-7 precursor             | R.IDREEVNQLR.F                    | 3 | 3.45 | 0.05 | -2.82 |
| IPI00001893 | Isoform A of Protocadherin-7 precursor             | R.LDASEGGGGTNPGR.S                | 2 | 4.50 | 0.46 | -3.16 |
| IPI00001893 | Isoform A of Protocadherin-7 precursor             | R.RLDASEGGGGTNPGR.S               | 2 | 4.55 | 0.44 | -2.54 |
| IPI00001893 | Isoform A of Protocadherin-7 precursor             | R.RLDASEGGGGTNPGR.S               | 3 | 3.98 | 0.11 |       |
| IPI00001893 | Isoform A of Protocadherin-7 precursor             | R.SSVFELQVADTPDGEKQPQLIVK.G       | 3 | 3.31 | 0.42 | -0.24 |
| IPI00001895 | Isoform 1 of Protocadherin-8 precursor             | K.VSGDTSFR.L                      | 2 | 2.05 | 0.15 | -2.20 |
| IPI00001895 | Isoform 1 of Protocadherin-8 precursor             | R.AQIPVEVSEGAAVGTR.I              | 2 | 5.19 | 0.50 | -3.77 |
| IPI00001895 | Isoform 1 of Protocadherin-8 precursor             | R.DVNDHAPR.F                      | 2 | 2.08 | 0.06 | -0.87 |
| IPI00001895 | Isoform 1 of Protocadherin-8 precursor             | R.GPAAPASAGSPER.S                 | 2 | 3.21 | 0.41 | -1.70 |
| IPI00001895 | Isoform 1 of Protocadherin-8 precursor             | R.IPLEVPVDEDVGANGLQTVR.L          | 2 | 5.72 | 0.60 | -4.19 |
| IPI00001895 | Isoform 1 of Protocadherin-8 precursor             | R.IPLEVPVDEDVGANGLQTVR.L          | 3 | 5.49 | 0.41 | -3.98 |
| IPI00001895 | Isoform 1 of Protocadherin-8 precursor             | R.VREGDGQLTVGDAGLDR.E             | 3 | 2.55 | 0.12 | -1.49 |
| IPI00001895 | Isoform 1 of Protocadherin-8 precursor             | R.VREGDGQLTVGDAGLDRER.L           | 3 | 3.62 | 0.32 | -4.02 |
| IPI00001895 | Isoform 1 of Protocadherin-8 precursor             | R.YSTFEEDAPGTVIGTLAEDLHM*K.V      | 2 | 4.50 | 0.56 | -2.28 |
| IPI00001895 | Isoform 1 of Protocadherin-8 precursor             | R.YSTFEEDAPGTVIGTLAEDLHM*K.V      | 3 | 3.92 | 0.40 | -2.84 |
| IPI00001952 | Endonuclease domain-containing 1 protein precursor | D.PNSNLEEAIINEAEITSVNSLGSK.Q      | 3 | 4.42 | 0.46 | -2.18 |
| IPI00001952 | Endonuclease domain-containing 1 protein precursor | K.DKVAVPEFVWLAACCAVPGGGWAM*GFVK.H | 3 | 3.36 | 0.21 | -3.93 |
| IPI00001952 | Endonuclease domain-containing 1 protein precursor | K.ILEVVNQIQDEER.M                 | 2 | 4.71 | 0.42 | -3.79 |
| IPI00001952 | Endonuclease domain-containing 1 protein precursor | K.ILEVVNQIQDEER.M                 | 3 | 3.68 | 0.30 | -2.89 |
| IPI00001952 | Endonuclease domain-containing 1 protein precursor | K.ILEVVNQIQDEERM*VQSQK.S          | 3 | 3.34 | 0.23 | -1.17 |
| IPI00001952 | Endonuclease domain-containing 1 protein precursor | K.KILEVVNQIQDEER.M                | 2 | 4.96 | 0.41 | -2.66 |
| IPI00001952 | Endonuclease domain-containing 1 protein precursor | K.KILEVVNQIQDEER.M                | 3 | 4.19 | 0.15 | -2.80 |
| IPI00001952 | Endonuclease domain-containing 1 protein precursor | K.LLPFNPQLFQNNCGETE QDTEK.M       | 2 | 4.78 | 0.47 | -4.35 |
| IPI00001952 | Endonuclease domain-containing 1 protein precursor | K.LLPFNPQLFQNNCGETE QDTEK.M       | 3 | 3.12 | 0.27 | -5.24 |
| IPI00001952 | Endonuclease domain-containing 1 protein precursor | K.QALNTDYLDSDYQR.G                | 2 | 4.24 | 0.55 | -2.15 |
| IPI00001952 | Endonuclease domain-containing 1 protein precursor | K.VAVPEFVWLAACCAVPGGGWAM*GFVK.H   | 3 | 3.57 | 0.15 | -3.30 |
| IPI00001952 | Endonuclease domain-containing 1 protein precursor | R.ALTPQCGSGEDLYILTGTVPSDYR.V      | 2 | 5.15 | 0.46 | -4.29 |

|             |                                                    |                                       |   |      |      |       |
|-------------|----------------------------------------------------|---------------------------------------|---|------|------|-------|
| IPI00001952 | Endonuclease domain-containing 1 protein precursor | R.APRPAPGGAEQR.W                      | 2 | 2.75 | 0.19 | -2.01 |
| IPI00001952 | Endonuclease domain-containing 1 protein precursor | R.APRPAPGGAEQR.W                      | 3 | 4.31 | 0.40 | -4.49 |
| IPI00001952 | Endonuclease domain-containing 1 protein precursor | R.DRIPVYSAFR.A                        | 2 | 2.88 | 0.15 | -2.77 |
| IPI00001952 | Endonuclease domain-containing 1 protein precursor | R.DRIPVYSAFR.A                        | 3 | 2.36 | 0.12 | -2.97 |
| IPI00001952 | Endonuclease domain-containing 1 protein precursor | R.DSDIIEDVM*VK.D                      | 1 | 3.42 | 0.31 | 1.09  |
| IPI00001952 | Endonuclease domain-containing 1 protein precursor | R.DSDIIEDVM*VK.D                      | 2 | 4.05 | 0.35 | -2.72 |
| IPI00001952 | Endonuclease domain-containing 1 protein precursor | R.FATLYSTR.D                          | 1 | 2.11 | 0.12 | -2.92 |
| IPI00001952 | Endonuclease domain-containing 1 protein precursor | R.FATLYSTR.D                          | 2 | 2.99 | 0.18 | -2.69 |
| IPI00001952 | Endonuclease domain-containing 1 protein precursor | R.GQLYPFSLSSDVQVATFTLTNSAPM*TQSFQER.W | 3 | 6.65 | 0.60 | -6.01 |
| IPI00001952 | Endonuclease domain-containing 1 protein precursor | R.GQLYPFSLSSDVQVATFTLTNSAPM*TQSFQER.W | 4 | 4.66 | 0.43 | -0.95 |
| IPI00001952 | Endonuclease domain-containing 1 protein precursor | R.WLVEPQIDDPNSNLEEAINAEAITSVNSLGSK.Q  | 3 | 4.92 | 0.52 | -0.67 |
| IPI00001952 | Endonuclease domain-containing 1 protein precursor | R.WYVNLHSLM*DR.A                      | 2 | 3.01 | 0.41 | -2.95 |
| IPI00001960 | Chloride intracellular channel protein 4           | K.NSRPEANEALER.G                      | 2 | 2.63 | 0.25 | -3.38 |
| IPI00002142 | Protocadherin-10 precursor                         | R.FAELVLEKPLDR.E                      | 3 | 3.47 | 0.27 | -0.13 |
| IPI00002142 | Protocadherin-10 precursor                         | R.FAELVLEKPLDREQQA.V                  | 3 | 3.63 | 0.31 | -1.93 |
| IPI00002142 | Protocadherin-10 precursor                         | R.FAELVLEKPLDREQQAVHR.Y               | 3 | 3.67 | 0.39 | -2.42 |
| IPI00002142 | Protocadherin-10 precursor                         | R.FAELVLEKPLDREQQAVHR.Y               | 5 | 2.23 | 0.13 | -2.87 |
| IPI00002142 | Protocadherin-10 precursor                         | R.LTYSIVR.G                           | 2 | 2.16 | 0.08 | -2.48 |
| IPI00002142 | Protocadherin-10 precursor                         | R.SFDYEQLKDFSFQVEAR.D                 | 3 | 4.71 | 0.37 | -3.44 |
| IPI00002142 | Protocadherin-10 precursor                         | R.VAAVDADDGENAR.L                     | 2 | 4.38 | 0.45 | -3.83 |
| IPI00002147 | Chitinase-3-like protein 1 precursor               | K.AEFIKEAQPQK.K                       | 2 | 3.17 | 0.24 | -3.53 |
| IPI00002147 | Chitinase-3-like protein 1 precursor               | K.EAGTLAYYEICDFLR.G                   | 2 | 4.83 | 0.51 | -4.57 |
| IPI00002147 | Chitinase-3-like protein 1 precursor               | K.EAGTLAYYEICDFLR.G                   | 3 | 4.99 | 0.35 | -1.98 |
| IPI00002147 | Chitinase-3-like protein 1 precursor               | K.GNQWVGYYDDQESVK.S                   | 2 | 3.20 | 0.39 | -2.67 |
| IPI00002147 | Chitinase-3-like protein 1 precursor               | K.LVCYYTSWSQYR.E                      | 2 | 4.00 | 0.36 | -2.12 |
| IPI00002147 | Chitinase-3-like protein 1 precursor               | K.LVM*GIPTFGR.S                       | 2 | 2.73 | 0.26 | -2.38 |
| IPI00002147 | Chitinase-3-like protein 1 precursor               | K.QLLLSAALSAGK.V                      | 1 | 2.39 | 0.16 | -3.18 |
| IPI00002147 | Chitinase-3-like protein 1 precursor               | K.QLLLSAALSAGK.V                      | 2 | 3.36 | 0.26 | -4.40 |
| IPI00002147 | Chitinase-3-like protein 1 precursor               | K.TLLSVGGWNFGSQR.F                    | 2 | 4.45 | 0.51 | -3.22 |
| IPI00002147 | Chitinase-3-like protein 1 precursor               | K.TLLSVGGWNFGSQR.F                    | 3 | 2.98 | 0.34 | -1.66 |

|             |                                                    |                                 |   |      |      |       |
|-------------|----------------------------------------------------|---------------------------------|---|------|------|-------|
| IPI00002147 | Chitinase-3-like protein 1 precursor               | K.VQYLKDR.Q                     | 2 | 2.37 | 0.11 | -3.45 |
| IPI00002147 | Chitinase-3-like protein 1 precursor               | K.VTIDSSYDIAK.I                 | 2 | 3.47 | 0.33 | -3.34 |
| IPI00002147 | Chitinase-3-like protein 1 precursor               | R.EDGSGCFPDALDR.F               | 2 | 3.93 | 0.46 | -4.42 |
| IPI00002147 | Chitinase-3-like protein 1 precursor               | R.FPLTNAIK.D                    | 2 | 2.38 | 0.09 | -2.38 |
| IPI00002147 | Chitinase-3-like protein 1 precursor               | R.FPLTNAIKDALAAT.-              | 2 | 3.54 | 0.43 | -4.44 |
| IPI00002147 | Chitinase-3-like protein 1 precursor               | R.FSKIASNTQSR.R                 | 2 | 2.41 | 0.14 | -2.76 |
| IPI00002147 | Chitinase-3-like protein 1 precursor               | R.FSNTDYAVGYM*LR.L              | 2 | 4.75 | 0.53 | -3.31 |
| IPI00002147 | Chitinase-3-like protein 1 precursor               | R.GQEDASPDRFSNTDYAVGYM*LR.L     | 2 | 2.44 | 0.35 | -3.51 |
| IPI00002147 | Chitinase-3-like protein 1 precursor               | R.GQEDASPDRFSNTDYAVGYM*LR.L     | 3 | 5.85 | 0.53 | -4.91 |
| IPI00002147 | Chitinase-3-like protein 1 precursor               | R.ILGQQVPYATK.G                 | 1 | 2.53 | 0.30 | -3.67 |
| IPI00002147 | Chitinase-3-like protein 1 precursor               | R.ILGQQVPYATK.G                 | 2 | 3.66 | 0.39 | -2.83 |
| IPI00002147 | Chitinase-3-like protein 1 precursor               | R.LGAPASKLVM*GIPTFGR.S          | 3 | 2.50 | 0.19 | -2.76 |
| IPI00002147 | Chitinase-3-like protein 1 precursor               | R.QLAGAM*VWALDLDLDFQGSFCGQDLR.F | 3 | 5.14 | 0.42 | -4.49 |
| IPI00002147 | Chitinase-3-like protein 1 precursor               | R.SFTLASSETGVGAPISGPGIPGR.F     | 2 | 5.68 | 0.55 | -3.78 |
| IPI00002147 | Chitinase-3-like protein 1 precursor               | R.SFTLASSETGVGAPISGPGIPGR.F     | 3 | 4.68 | 0.49 | -2.81 |
| IPI00002147 | Chitinase-3-like protein 1 precursor               | R.SFTLASSETGVGAPISGPGIPGRFTK.E  | 2 | 3.32 | 0.41 | -2.66 |
| IPI00002147 | Chitinase-3-like protein 1 precursor               | R.SFTLASSETGVGAPISGPGIPGRFTK.E  | 3 | 5.88 | 0.61 | -2.67 |
| IPI00002147 | Chitinase-3-like protein 1 precursor               | R.TFIKSVPPFLR.T                 | 3 | 2.36 | 0.25 | -3.08 |
| IPI00002147 | Chitinase-3-like protein 1 precursor               | R.THGFDGLDLAWLYPGR.R            | 2 | 4.45 | 0.51 | -2.72 |
| IPI00002147 | Chitinase-3-like protein 1 precursor               | R.THGFDGLDLAWLYPGR.R            | 3 | 2.46 | 0.15 | -2.60 |
| IPI00002147 | Chitinase-3-like protein 1 precursor               | W.VGYDDQESVK.S                  | 2 | 3.20 | 0.42 | -2.56 |
| IPI00002191 | Putative uncharacterized protein FLJ12684          | R.ALFPSLGTYDLEK.A               | 2 | 2.73 | 0.30 | -2.89 |
| IPI00002211 | Isoform 2 of Semaphorin-6A precursor               | K.HANVALFADGK.L                 | 1 | 2.89 | 0.41 | -0.54 |
| IPI00002211 | Isoform 2 of Semaphorin-6A precursor               | K.HANVALFADGK.L                 | 2 | 3.51 | 0.44 | -0.04 |
| IPI00002211 | Isoform 2 of Semaphorin-6A precursor               | K.HLLDSPDSTDPLGAVSSH.N          | 2 | 5.16 | 0.62 | -3.60 |
| IPI00002211 | Isoform 2 of Semaphorin-6A precursor               | K.M*DTLEPGDEFSGM*AR.C           | 2 | 4.67 | 0.43 | -4.54 |
| IPI00002211 | Isoform 2 of Semaphorin-6A precursor               | K.SPDSTWTPVPDER.V               | 2 | 2.91 | 0.37 | -2.64 |
| IPI00002211 | Isoform 2 of Semaphorin-6A precursor               | R.DPYCGWIK.E                    | 2 | 2.75 | 0.14 | -1.77 |
| IPI00002211 | Isoform 2 of Semaphorin-6A precursor               | R.EIAVEYNM*GK.V                 | 2 | 3.34 | 0.41 | -4.24 |
| IPI00002211 | Isoform 2 of Semaphorin-6A precursor               | R.IM*GM*QLDR.A                  | 2 | 2.71 | 0.23 | -1.83 |
| IPI00002211 | Isoform 2 of Semaphorin-6A precursor               | R.LTFEQDIER.G                   | 2 | 2.67 | 0.22 | -3.91 |
| IPI00002211 | Isoform 2 of Semaphorin-6A precursor               | R.SLGESPTLR.T                   | 2 | 2.17 | 0.15 | -2.43 |
| IPI00002211 | Isoform 2 of Semaphorin-6A precursor               | R.YATSNEFPDDLNFILK.T            | 2 | 4.88 | 0.46 | -7.93 |
| IPI00002236 | Lactadherin precursor                              | K.EVTGIITQGAR.N                 | 2 | 3.99 | 0.27 | -3.46 |
| IPI00002236 | Lactadherin precursor                              | K.NAVHVNLFETPVEAQYVR.L          | 3 | 3.79 | 0.38 | -4.10 |
| IPI00002236 | Lactadherin precursor                              | K.NLFETPILAR.Y                  | 2 | 2.49 | 0.12 | -2.45 |
| IPI00002236 | Lactadherin precursor                              | K.VAYSLNGHEFDIFIHDVNKK.H        | 3 | 3.29 | 0.28 | -0.93 |
| IPI00002236 | Lactadherin precursor                              | R.GDVFPSTYCTCLK.G               | 2 | 3.35 | 0.40 | -1.42 |
| IPI00002236 | Lactadherin precursor                              | R.LASHEYLK.A                    | 2 | 2.35 | 0.12 | 0.19  |
| IPI00002236 | Lactadherin precursor                              | R.VTFLGLQHWVPELAR.L             | 3 | 3.30 | 0.12 | -2.24 |
| IPI00002243 | Isoform 1 of Gamma-glutamyltransferase 5 precursor | R.DLLGETLAQLIR.Q                | 2 | 3.73 | 0.30 | -4.21 |

|             |                                                           |                                  |   |      |      |       |
|-------------|-----------------------------------------------------------|----------------------------------|---|------|------|-------|
| IPI00002280 | ProSAAS precursor                                         | A.ADHVGSSELPPEGVLGALLR.V         | 2 | 6.02 | 0.53 | -3.61 |
| IPI00002280 | ProSAAS precursor                                         | A.ADHVGSSELPPEGVLGALLR.V         | 3 | 3.99 | 0.38 | -4.69 |
| IPI00002280 | ProSAAS precursor                                         | A.DHDVGSSELPPEGVLGALLR.V         | 2 | 6.19 | 0.59 | -4.16 |
| IPI00002280 | ProSAAS precursor                                         | A.DHDVGSSELPPEGVLGALLR.V         | 3 | 4.57 | 0.39 | -3.81 |
| IPI00002280 | ProSAAS precursor                                         | D.DDPDAPAAQLAR.A                 | 2 | 3.50 | 0.45 | -1.57 |
| IPI00002280 | ProSAAS precursor                                         | D.HDVGSSELPPEGVLGALLR.V          | 2 | 4.55 | 0.46 | -3.77 |
| IPI00002280 | ProSAAS precursor                                         | D.HDVGSSELPPEGVLGALLR.V          | 3 | 4.39 | 0.33 | -2.70 |
| IPI00002280 | ProSAAS precursor                                         | G.SELPPEGVLGALLR.V               | 2 | 3.34 | 0.39 | -2.63 |
| IPI00002280 | ProSAAS precursor                                         | H.DVGSSELPPEGVLGALLR.V           | 2 | 3.59 | 0.23 | -2.02 |
| IPI00002280 | ProSAAS precursor                                         | K.RLETPAPQVPAR.R                 | 2 | 3.12 | 0.31 | -2.17 |
| IPI00002280 | ProSAAS precursor                                         | L.PPEGVLGALLR.V                  | 1 | 3.15 | 0.30 | -4.21 |
| IPI00002280 | ProSAAS precursor                                         | L.PPEGVLGALLR.V                  | 2 | 3.72 | 0.33 | -3.29 |
| IPI00002280 | ProSAAS precursor                                         | L.SAASPPLAETGAPR.R               | 2 | 3.16 | 0.42 | -2.67 |
| IPI00002280 | ProSAAS precursor                                         | P.AGPDAAEAGDETPDVPELLR.Y         | 2 | 3.03 | 0.32 | -1.33 |
| IPI00002280 | ProSAAS precursor                                         | P.PEGVLGALLR.V                   | 1 | 2.58 | 0.13 | -2.77 |
| IPI00002280 | ProSAAS precursor                                         | R.AADHDVGSSELPPEGVLGALLR         | 2 | 4.36 | 0.47 | -4.94 |
| IPI00002280 | ProSAAS precursor                                         | R.AADHDVGSSELPPEGVLGALLR.V       | 2 | 6.30 | 0.58 | -3.82 |
| IPI00002280 | ProSAAS precursor                                         | R.AADHDVGSSELPPEGVLGALLR.V       | 3 | 3.82 | 0.39 | -4.38 |
| IPI00002280 | ProSAAS precursor                                         | R.AADHDVGSSELPPEGVLGALLRV.K      | 2 | 5.52 | 0.57 | -4.15 |
| IPI00002280 | ProSAAS precursor                                         | R.ALAHLLAERQER.A                 | 2 | 3.24 | 0.29 | -4.00 |
| IPI00002280 | ProSAAS precursor                                         | R.ALAHLLAERQER.A                 | 3 | 2.78 | 0.29 |       |
| IPI00002280 | ProSAAS precursor                                         | R.ARAEAQEAEDQQAR.V               | 2 | 4.22 | 0.48 | -5.00 |
| IPI00002280 | ProSAAS precursor                                         | R.ARAEAQEAEDQQAR.V               | 3 | 3.69 | 0.28 | -3.09 |
| IPI00002280 | ProSAAS precursor                                         | R.GEAAGAVQELAR.A                 | 2 | 3.87 | 0.25 | -3.21 |
| IPI00002280 | ProSAAS precursor                                         | R.GLSAASPPLAETGAPR.R             | 2 | 3.67 | 0.29 | -3.71 |
| IPI00002280 | ProSAAS precursor                                         | R.ILAGSADSEGVAAPR.R              | 2 | 4.42 | 0.38 | -4.13 |
| IPI00002280 | ProSAAS precursor                                         | R.ILAGSADSEGVAAPR.R              | 3 | 3.34 | 0.15 | -3.26 |
| IPI00002280 | ProSAAS precursor                                         | R.LETPAPQVPAR.R                  | 2 | 2.45 | 0.08 | -2.99 |
| IPI00002280 | ProSAAS precursor                                         | R.NSDPALGLDDDPDAPAAQLAR.A        | 2 | 6.16 | 0.54 | -3.98 |
| IPI00002280 | ProSAAS precursor                                         | R.NSDPALGLDDDPDAPAAQLAR.A        | 3 | 3.47 | 0.28 | -3.39 |
| IPI00002280 | ProSAAS precursor                                         | R.SVPRGEAAGAVQELAR.A             | 2 | 3.97 | 0.43 | -2.85 |
| IPI00002280 | ProSAAS precursor                                         | R.SVPRGEAAGAVQELAR.A             | 3 | 3.90 | 0.32 | -2.27 |
| IPI00002283 | Isoform 2 of Patched domain-containing protein 2          | R.ETPPLEDLAANQSEDPR.N            | 3 | 3.27 | 0.32 | -1.59 |
| IPI00002283 | Isoform 2 of Patched domain-containing protein 2          | R.ETPPLEDLAANQSEDPRNQR.L         | 3 | 2.29 | 0.14 | -1.96 |
| IPI00002307 | Isoform 1 of Neuroligin-3 precursor                       | K.ELVEQDIQPAR.Y                  | 2 | 3.12 | 0.19 | -1.99 |
| IPI00002307 | Isoform 1 of Neuroligin-3 precursor                       | K.GNYGLLDQIQALR.W                | 2 | 3.90 | 0.15 | -2.82 |
| IPI00002307 | Isoform 1 of Neuroligin-3 precursor                       | R.VGVLFSTGDDQAAK.G               | 2 | 4.50 | 0.26 | -2.82 |
| IPI00002307 | Isoform 1 of Neuroligin-3 precursor                       | R.VPLPSEILGPVDQYLGVPYAAPPIGEKR.F | 3 | 5.11 | 0.55 | -4.61 |
| IPI00002307 | Isoform 1 of Neuroligin-3 precursor                       | R.VPLPSEILGPVDQYLGVPYAAPPIGEKR.F | 4 | 3.19 | 0.14 | -4.00 |
| IPI00002320 | Leucine-rich repeat transmembrane protein FLRT3 precursor | R.IYLYHNSLDEFPTNLPK.Y            | 3 | 3.68 | 0.20 | -3.26 |

|             |                                                           |                                           |   |      |      |       |
|-------------|-----------------------------------------------------------|-------------------------------------------|---|------|------|-------|
| IPI00002320 | Leucine-rich repeat transmembrane protein FLRT3 precursor | R.VPPNAFSYLR.Q                            | 2 | 2.38 | 0.23 | -1.26 |
| IPI00002334 | Neuron-specific protein family member 1                   | K.LSEQETEAAEK.S                           | 2 | 4.10 | 0.29 | -2.15 |
| IPI00002334 | Neuron-specific protein family member 1                   | K.LSEQETEAAEKSA.-                         | 2 | 2.83 | 0.25 | -2.88 |
| IPI00002334 | Neuron-specific protein family member 1                   | S.VLSEEKLSQETEAAEK.S                      | 2 | 5.67 | 0.56 | -1.56 |
| IPI00002406 | Lutheran blood group glycoprotein precursor               | R.AGAAGTAEATAR.L                          | 2 | 3.72 | 0.42 | -1.90 |
| IPI00002406 | Lutheran blood group glycoprotein precursor               | R.EGDEVTLIC SAR.G                         | 2 | 3.38 | 0.37 | -3.13 |
| IPI00002406 | Lutheran blood group glycoprotein precursor               | R.EGDTVQLLCR.G                            | 2 | 2.36 | 0.15 | -2.72 |
| IPI00002406 | Lutheran blood group glycoprotein precursor               | R.GDGSPSPEYTLFR.L                         | 2 | 2.31 | 0.20 | -1.57 |
| IPI00002406 | Lutheran blood group glycoprotein precursor               | R.GRSPPYQLDSQGR.L                         | 2 | 3.51 | 0.42 | -2.29 |
| IPI00002406 | Lutheran blood group glycoprotein precursor               | R.LEVPVEM*NPEGYM*TSR.T                    | 2 | 4.46 | 0.42 | -3.28 |
| IPI00002406 | Lutheran blood group glycoprotein precursor               | R.LSVPLVEVM*R.G                           | 2 | 1.76 | 0.21 | -1.47 |
| IPI00002406 | Lutheran blood group glycoprotein precursor               | R.VAYLDPLELSE GK.V                        | 2 | 3.62 | 0.42 | -2.55 |
| IPI00002406 | Lutheran blood group glycoprotein precursor               | R.VEDYDAADDVQLSK.T                        | 2 | 5.78 | 0.47 | -1.91 |
| IPI00002412 | Palmitoyl-protein thioesterase 1 precursor                | K.LQQGYNAM*GFSQGGQFLR.A                   | 2 | 4.69 | 0.51 | -2.32 |
| IPI00002459 | annexin VI isoform 2                                      | K.ALIEILATR.T                             | 2 | 2.21 | 0.16 | -1.98 |
| IPI00002478 | Isoform B of Endothelin-converting enzyme 1               | R.QTECM*VEQYSNYSVNGEPVNGRHTLGENIADNGGLK.A | 3 | 2.49 | 0.21 | -3.11 |
| IPI00002491 | Isoform 9 of Sorbin and SH3 domain-containing protein 1   | R.ETPSSSPASPQETR.Q                        | 2 | 1.65 | 0.20 | -3.41 |
| IPI00002511 | Cyclic AMP-dependent transcription factor ATF-6 alpha     | K.EAQDTS DGIQK.N                          | 2 | 3.19 | 0.08 | -4.05 |
| IPI00002511 | Cyclic AMP-dependent transcription factor ATF-6 alpha     | R.NSGSELQVYYASPR.S                        | 2 | 3.70 | 0.34 | -3.73 |
| IPI00002525 | Neudesin precursor                                        | K.ELEALDEVFTK.V                           | 2 | 3.19 | 0.26 | -0.66 |
| IPI00002525 | Neudesin precursor                                        | K.GVVFDVTS GKEFYGR.G                      | 2 | 4.06 | 0.49 | -1.87 |
| IPI00002525 | Neudesin precursor                                        | K.M*SLDPADLTHDTTGLTAK.E                   | 2 | 3.69 | 0.44 | -3.79 |
| IPI00002525 | Neudesin precursor                                        | K.YPIVGYTAR.R                             | 2 | 2.26 | 0.09 | -1.49 |
| IPI00002525 | Neudesin precursor                                        | R.ILNEDGSPNLDFKPEDQPHFDIKDEF.-            | 4 | 2.51 | 0.11 | -2.44 |
| IPI00002525 | Neudesin precursor                                        | R.LFTEELAR.Y                              | 2 | 3.05 | 0.29 | -2.01 |
| IPI00002535 | FK506-binding protein 2 precursor                         | R.KLVIPSELGYGER.G                         | 3 | 3.74 | 0.25 | -1.44 |
| IPI00002714 | Dickkopf-related protein 3 precursor                      | C.CGDQLCVWGHCTK.M                         | 2 | 3.07 | 0.44 | 2.51  |
| IPI00002714 | Dickkopf-related protein 3 precursor                      | E.CCGDQLCVWGHCTK.M                        | 2 | 4.06 | 0.54 | -1.91 |
| IPI00002714 | Dickkopf-related protein 3 precursor                      | E.VRQELEDLER.S                            | 2 | 3.10 | 0.29 | -1.59 |
| IPI00002714 | Dickkopf-related protein 3 precursor                      | F.ASFQYTCQPCR.G                           | 2 | 3.40 | 0.39 | -2.43 |
| IPI00002714 | Dickkopf-related protein 3 precursor                      | F.PVCTPLPVEGELCHDPASR.L                   | 2 | 5.11 | 0.60 | -3.23 |
| IPI00002714 | Dickkopf-related protein 3 precursor                      | I.TWELEPDGALDR.C                          | 2 | 3.49 | 0.13 | -0.96 |
| IPI00002714 | Dickkopf-related protein 3 precursor                      | K.LRSAVEEM*EAE EAAK.A                     | 2 | 3.89 | 0.30 | -4.32 |
| IPI00002714 | Dickkopf-related protein 3 precursor                      | L.PVEGELCHDPASR.L                         | 1 | 2.61 | 0.17 | -1.92 |
| IPI00002714 | Dickkopf-related protein 3 precursor                      | Q.PGLCCAFQR.G                             | 1 | 2.13 | 0.19 | -2.75 |
| IPI00002714 | Dickkopf-related protein 3 precursor                      | Q.PGLCCAFQR.G                             | 2 | 3.12 | 0.29 | -2.03 |
| IPI00002714 | Dickkopf-related protein 3 precursor                      | R.DCQPGLCCAFQR.G                          | 1 | 2.89 | 0.43 | -1.83 |
| IPI00002714 | Dickkopf-related protein 3 precursor                      | R.DCQPGLCCAFQR.G                          | 2 | 4.30 | 0.47 | -4.38 |

|             |                                      |                                     |   |      |      |       |
|-------------|--------------------------------------|-------------------------------------|---|------|------|-------|
| IPI00002714 | Dickkopf-related protein 3 precursor | R.DCQPGLCCAFQR.G                    | 3 | 4.02 | 0.40 | -1.20 |
| IPI00002714 | Dickkopf-related protein 3 precursor | R.DQDGEILLPR.E                      | 1 | 2.35 | 0.29 | -4.72 |
| IPI00002714 | Dickkopf-related protein 3 precursor | R.DQDGEILLPR.E                      | 2 | 3.73 | 0.23 | -4.50 |
| IPI00002714 | Dickkopf-related protein 3 precursor | R.DSECCGDQLCVWGHCTK.M               | 2 | 4.97 | 0.69 | -3.04 |
| IPI00002714 | Dickkopf-related protein 3 precursor | R.DSECCGDQLCVWGHCTK.M               | 3 | 2.99 | 0.41 | -2.24 |
| IPI00002714 | Dickkopf-related protein 3 precursor | R.EVEELM*EDTQH.K                    | 2 | 3.69 | 0.45 | -1.96 |
| IPI00002714 | Dickkopf-related protein 3 precursor | R.EVEELM*EDTQH.K.L                  | 1 | 2.58 | 0.46 | 0.20  |
| IPI00002714 | Dickkopf-related protein 3 precursor | R.EVEELM*EDTQH.K.L                  | 2 | 3.69 | 0.44 | -3.37 |
| IPI00002714 | Dickkopf-related protein 3 precursor | R.EVEELM*EDTQH.K.L                  | 3 | 1.90 | 0.25 | 1.44  |
| IPI00002714 | Dickkopf-related protein 3 precursor | R.EVEELM*EDTQH.KLR.S                | 2 | 3.61 | 0.35 | -5.56 |
| IPI00002714 | Dickkopf-related protein 3 precursor | R.EVEELM*EDTQH.KLR.S                | 3 | 1.46 | 0.14 | -2.27 |
| IPI00002714 | Dickkopf-related protein 3 precursor | R.EVEELMEDTQH.K.L                   | 2 | 3.25 | 0.27 |       |
| IPI00002714 | Dickkopf-related protein 3 precursor | R.EVPDEYEVGSFM*EEVR.Q               | 2 | 4.31 | 0.52 | -4.24 |
| IPI00002714 | Dickkopf-related protein 3 precursor | R.EVPDEYEVGSFM*EEVRQELEDLER.S       | 2 | 2.54 | 0.45 | -3.80 |
| IPI00002714 | Dickkopf-related protein 3 precursor | R.EVPDEYEVGSFM*EEVRQELEDLER.S       | 3 | 3.55 | 0.42 | -5.57 |
| IPI00002714 | Dickkopf-related protein 3 precursor | R.EVPDEYEVGSFM*EEVRQELEDLER.S       | 4 | 2.96 | 0.15 | -3.88 |
| IPI00002714 | Dickkopf-related protein 3 precursor | R.EVPDEYEVGSFMEEVRQELEDLER.S        | 3 | 2.25 | 0.40 | -2.69 |
| IPI00002714 | Dickkopf-related protein 3 precursor | R.GLLFPVCTPLPVEGELCHD.P             | 2 | 4.02 | 0.52 | -4.21 |
| IPI00002714 | Dickkopf-related protein 3 precursor | R.GLLFPVCTPLPVEGELCHDPASR.L         | 2 | 4.27 | 0.56 | -4.62 |
| IPI00002714 | Dickkopf-related protein 3 precursor | R.GLLFPVCTPLPVEGELCHDPASR.L         | 3 | 3.00 | 0.37 | -7.60 |
| IPI00002714 | Dickkopf-related protein 3 precursor | R.GLLFPVCTPLPVEGELCHDPASR.L         | 4 | 3.10 | 0.34 | -2.23 |
| IPI00002714 | Dickkopf-related protein 3 precursor | R.LLDLITWELEPDGALDR.C               | 2 | 6.04 | 0.45 | -6.15 |
| IPI00002714 | Dickkopf-related protein 3 precursor | R.LLDLITWELEPDGALDR.C               | 3 | 4.00 | 0.24 | -4.16 |
| IPI00002714 | Dickkopf-related protein 3 precursor | R.LLDLITWELEPDGALDRCPASGLLCQPH.S    | 3 | 4.94 | 0.37 | -1.88 |
| IPI00002714 | Dickkopf-related protein 3 precursor | R.QELEDLER.S                        | 1 | 1.37 | 0.08 | -4.10 |
| IPI00002714 | Dickkopf-related protein 3 precursor | R.RSHECIIDEDCGPSM*YCQFASFQYTCQPCR.G | 4 | 3.72 | 0.41 | -2.85 |
| IPI00002714 | Dickkopf-related protein 3 precursor | R.SAVEEM*EAEAAAK.A                  | 1 | 3.27 | 0.35 | -3.16 |
| IPI00002714 | Dickkopf-related protein 3 precursor | R.SAVEEM*EAEAAAK.A                  | 2 | 5.36 | 0.51 | -4.96 |
| IPI00002714 | Dickkopf-related protein 3 precursor | R.SAVEEM*EAEAAAK.A                  | 3 | 4.28 | 0.34 | -4.59 |
| IPI00002714 | Dickkopf-related protein 3 precursor | R.SAVEEMEAEAAAK.A                   | 2 | 3.04 | 0.26 |       |
| IPI00002714 | Dickkopf-related protein 3 precursor | R.SHECIIDEDCGPSM*YCQFASFQYTCQPCR.G  | 3 | 7.47 | 0.74 | -1.40 |
| IPI00002714 | Dickkopf-related protein 3 precursor | R.SHECIIDEDCGPSM*YCQFASFQYTCQPCR.G  | 4 | 5.57 | 0.50 | -1.73 |
| IPI00002714 | Dickkopf-related protein 3 precursor | R.SLTEEM*ALGEPAAAAAALLGGEEI.-       | 2 | 5.48 | 0.54 | -5.15 |
| IPI00002714 | Dickkopf-related protein 3 precursor | R.SLTEEM*ALGEPAAAAAALLGGEEI.-       | 3 | 2.69 | 0.27 | -2.75 |
| IPI00002714 | Dickkopf-related protein 3 precursor | S.APVKPGPALSYPQEEATLNEM*FR.E        | 3 | 3.62 | 0.26 | -0.11 |
| IPI00002714 | Dickkopf-related protein 3 precursor | S.FM*EEVRQELEDLER.S                 | 3 | 3.74 | 0.33 | -2.35 |
| IPI00002714 | Dickkopf-related protein 3 precursor | V.PDEYEVGSFM*EEVRQELEDLER.S         | 3 | 3.77 | 0.45 | -2.56 |
| IPI00002714 | Dickkopf-related protein 3 precursor | V.RQELEDLER.S                       | 2 | 3.13 | 0.11 | -3.94 |
| IPI00002732 | EXTL2 protein (Fragment)             | K.APDELWNSLGPHPIPVIK.Q              | 3 | 2.79 | 0.29 | -3.22 |
| IPI00002732 | EXTL2 protein (Fragment)             | K.LLNHYQAVPNLHK.V                   | 2 | 3.51 | 0.35 | -3.64 |
| IPI00002732 | EXTL2 protein (Fragment)             | K.LLNHYQAVPNLHK.V                   | 3 | 2.71 | 0.15 | -2.59 |
| IPI00002732 | EXTL2 protein (Fragment)             | K.LVNIYDSM*PLR.Y                    | 2 | 2.34 | 0.30 | -1.02 |

|             |                                                                 |                                   |   |      |      |       |
|-------------|-----------------------------------------------------------------|-----------------------------------|---|------|------|-------|
| IPI00002732 | EXTL2 protein (Fragment)                                        | K.TSGIFVKPVNM*DNLEK.E             | 2 | 3.57 | 0.31 | -3.27 |
| IPI00002732 | EXTL2 protein (Fragment)                                        | K.TSGIFVKPVNM*DNLEK.E             | 3 | 2.32 | 0.21 | -3.14 |
| IPI00002732 | EXTL2 protein (Fragment)                                        | K.VIVVWNNIGEK.A                   | 2 | 2.89 | 0.34 | -2.17 |
| IPI00002732 | EXTL2 protein (Fragment)                                        | K.VIVVWNNIGEKAPDELWNSLGPPIPVIFK.Q | 4 | 3.45 | 0.37 | -3.14 |
| IPI00002732 | EXTL2 protein (Fragment)                                        | K.YLELFQR.Q                       | 2 | 2.77 | 0.13 | -1.34 |
| IPI00002732 | EXTL2 protein (Fragment)                                        | R.QPAAVHALIDDTQNCDDIAM*NFIIAK.H   | 3 | 5.31 | 0.46 | -3.60 |
| IPI00002732 | EXTL2 protein (Fragment)                                        | R.YSNIM*ISQFGFPYANYK.K            | 2 | 5.48 | 0.54 | -4.66 |
| IPI00002732 | EXTL2 protein (Fragment)                                        | R.YSNIM*ISQFGFPYANYK.K            | 3 | 3.79 | 0.30 | -3.45 |
| IPI00002745 | Cathepsin Z precursor                                           | K.M*M*AEIYANGPISCGIM*ATER.L       | 2 | 6.47 | 0.64 | -1.28 |
| IPI00002745 | Cathepsin Z precursor                                           | K.M*M*AEIYANGPISCGIM*ATER.L       | 3 | 5.43 | 0.54 | -2.59 |
| IPI00002745 | Cathepsin Z precursor                                           | R.EKM*M*AEIYANGPISCGIM*ATER.L     | 3 | 4.39 | 0.47 | -0.58 |
| IPI00002745 | Cathepsin Z precursor                                           | R.IVTSTYKDGK.G                    | 1 | 2.51 | 0.29 | -4.54 |
| IPI00002745 | Cathepsin Z precursor                                           | R.IVTSTYKDGK.G                    | 2 | 3.09 | 0.31 | -2.59 |
| IPI00002745 | Cathepsin Z precursor                                           | R.NSWGEPWGER.G                    | 2 | 2.34 | 0.15 | -2.79 |
| IPI00002745 | Cathepsin Z precursor                                           | R.NVDGVNYASITR.N                  | 2 | 3.47 | 0.37 | -3.03 |
| IPI00002745 | Cathepsin Z precursor                                           | R.STYPRPHEYLSPADLPK.S             | 2 | 3.90 | 0.42 | -5.08 |
| IPI00002745 | Cathepsin Z precursor                                           | R.STYPRPHEYLSPADLPK.S             | 3 | 4.52 | 0.35 | -1.28 |
| IPI00002745 | Cathepsin Z precursor                                           | R.VGDYGSLSGR.E                    | 1 | 2.28 | 0.33 | -3.25 |
| IPI00002745 | Cathepsin Z precursor                                           | R.VGDYGSLSGR.E                    | 2 | 3.97 | 0.41 | -4.17 |
| IPI00002745 | Cathepsin Z precursor                                           | R.YNLAIEEHCTFGDPIV.-              | 2 | 3.92 | 0.41 | -5.04 |
| IPI00002790 | Isoform 1 of Protein sel-1 homolog 1 precursor                  | R.VVAGQIFLDSEESELESSIQEEEDSLK.S   | 3 | 6.58 | 0.55 | -2.82 |
| IPI00002816 | Cathepsin F precursor                                           | K.DCGPVDTKVPGAGEPK.S              | 2 | 3.54 | 0.33 | -1.21 |
| IPI00002816 | Cathepsin F precursor                                           | K.FSDLTEEEFR.T                    | 2 | 1.41 | 0.09 | -2.93 |
| IPI00002816 | Cathepsin F precursor                                           | K.GYYLHR.G                        | 2 | 2.11 | 0.21 | -1.76 |
| IPI00002816 | Cathepsin F precursor                                           | K.KTLLCSFQVLDELGR.H               | 2 | 4.14 | 0.46 | -3.15 |
| IPI00002816 | Cathepsin F precursor                                           | K.KTLLCSFQVLDELGR.H               | 3 | 4.07 | 0.33 | -3.46 |
| IPI00002816 | Cathepsin F precursor                                           | K.TLLCSFQVLDELGR.H                | 2 | 4.73 | 0.44 | -3.88 |
| IPI00002816 | Cathepsin F precursor                                           | K.TLLCSFQVLDELGR.H                | 3 | 2.82 | 0.08 | -2.86 |
| IPI00002816 | Cathepsin F precursor                                           | R.AASFQAWGPPPELLAPTR.F            | 2 | 3.58 | 0.38 | 1.70  |
| IPI00002816 | Cathepsin F precursor                                           | R.FALEM*FNR.G                     | 2 | 2.73 | 0.27 | -2.79 |
| IPI00002816 | Cathepsin F precursor                                           | R.GTAQYGVTK.F                     | 2 | 2.95 | 0.37 | -0.66 |
| IPI00002816 | Cathepsin F precursor                                           | R.TIYLNTLLR.K                     | 2 | 3.09 | 0.13 | -1.29 |
| IPI00002818 | Isoform 1 of Kallikrein-11 precursor                            | K.M*ASPVSITWAVRPLTLSSR.C          | 3 | 2.18 | 0.24 | -3.33 |
| IPI00002884 | CDNA: FLJ22222 fis, clone HRC01658                              | R.YFGDKIQNIFSEEDFR.L              | 3 | 3.31 | 0.25 | -2.34 |
| IPI00002925 | Cocaine- and amphetamine-regulated transcript protein precursor | A.VDDASHEKELIEALQEVLK.L           | 3 | 4.31 | 0.33 | -3.85 |
| IPI00002925 | Cocaine- and amphetamine-regulated transcript protein precursor | K.ELIEALQEVLK.K                   | 2 | 3.85 | 0.13 | -2.18 |
| IPI00002925 | Cocaine- and amphetamine-regulated transcript protein precursor | K.YGQVPM*CDAGEQCAVR.K             | 2 | 3.83 | 0.38 | -4.90 |
| IPI00002925 | Cocaine- and amphetamine-regulated transcript protein precursor | K.YGQVPM*CDAGEQCAVR.K             | 3 | 4.06 | 0.43 | -4.70 |



|             |                                                                                   |                                   |   |      |      |       |
|-------------|-----------------------------------------------------------------------------------|-----------------------------------|---|------|------|-------|
| IPI00002925 | Cocaine- and amphetamine-regulated transcript protein precursor                   | R.ALDIYSAVDDASHEKELIEALQEVLK.K    | 3 | 7.10 | 0.59 | -5.50 |
| IPI00002925 | Cocaine- and amphetamine-regulated transcript protein precursor                   | R.ALDIYSAVDDASHEKELIEALQEVLK.K    | 4 | 3.56 | 0.24 | -3.23 |
| IPI00002925 | Cocaine- and amphetamine-regulated transcript protein precursor                   | R.GTSCNSFLK.C                     | 2 | 2.05 | 0.08 | -1.39 |
| IPI00002925 | Cocaine- and amphetamine-regulated transcript protein precursor                   | S.AVDDASHEKELIEALQEVLK.K          | 3 | 5.29 | 0.42 | -2.35 |
| IPI00002966 | Heat shock 70 kDa protein 4                                                       | K.LFEELGK.Q                       | 2 | 2.14 | 0.07 | -3.69 |
| IPI00002966 | Heat shock 70 kDa protein 4                                                       | R.AFSDPFVEAEKSNLAYDIVQLPTGLTGIK.V | 3 | 4.03 | 0.40 | -2.65 |
| IPI00002993 | Transcription initiation factor TFIID subunit 9                                   | K.REDDDDDDDDDDDDYDNL.-            | 2 | 1.12 | 0.21 | -7.27 |
| IPI00003021 | Sodium/potassium-transporting ATPase subunit alpha-2 precursor                    | K.LSLDELGR.K                      | 2 | 2.60 | 0.11 | -2.68 |
| IPI00003021 | Sodium/potassium-transporting ATPase subunit alpha-2 precursor                    | K.QAADMILLDDNFASIVTGVVEEGR.L      | 2 | 5.62 | 0.61 | -2.21 |
| IPI00003021 | Sodium/potassium-transporting ATPase subunit alpha-2 precursor                    | K.QAADMILLDDNFASIVTGVVEEGR.L      | 3 | 4.80 | 0.48 | -1.61 |
| IPI00003021 | Sodium/potassium-transporting ATPase subunit alpha-2 precursor                    | K.VDNSSLTGESEPQTR.S               | 2 | 4.55 | 0.40 | -2.59 |
| IPI00003021 | Sodium/potassium-transporting ATPase subunit alpha-2 precursor                    | R.DTAGDASESALLK.C                 | 2 | 3.87 | 0.35 | -1.81 |
| IPI00003021 | Sodium/potassium-transporting ATPase subunit alpha-2 precursor                    | R.SPEFTHENPLETR.N                 | 3 | 3.77 | 0.37 | -1.20 |
| IPI00003031 | Isoform 2 of Isochorismatase domain-containing protein 2, mitochondrial precursor | R.QSGAFLSTSEGLILQLVGDVHPQFK.E     | 3 | 2.38 | 0.11 | -2.97 |
| IPI00003102 | Ciliary neurotrophic factor receptor alpha precursor                              | K.DNEIGTWSWVAHAHATPWTEEP.H        | 3 | 2.55 | 0.21 | -7.86 |
| IPI00003102 | Ciliary neurotrophic factor receptor alpha precursor                              | K.EYIIQVAAK.D                     | 2 | 2.31 | 0.21 | -3.56 |
| IPI00003102 | Ciliary neurotrophic factor receptor alpha precursor                              | R.HSPQEAPHVQYER.L                 | 2 | 2.75 | 0.36 | -4.81 |
| IPI00003102 | Ciliary neurotrophic factor receptor alpha precursor                              | R.YM*HLFSTIK.Y                    | 2 | 2.04 | 0.16 | -3.14 |
| IPI00003102 | Ciliary neurotrophic factor receptor alpha precursor                              | R.YRPLILDQWQHVELSDGTAHTITDAYAGK.E | 4 | 3.77 | 0.25 | -2.49 |
| IPI00003102 | Ciliary neurotrophic factor receptor alpha precursor                              | R.YRPLILDQWQHVELSDGTAHTITDAYAGK.E | 5 | 3.21 | 0.18 | -3.45 |
| IPI00003111 | Ig kappa chain V-I region AU                                                      | R.VTITCQASQDISNYLNWYQQKPGK.A      | 3 | 5.06 | 0.16 |       |
| IPI00003176 | Serine protease HTRA1 precursor                                                   | K.IDHQGKLPVLLLGR.S                | 2 | 3.21 | 0.38 | -3.03 |
| IPI00003176 | Serine protease HTRA1 precursor                                                   | K.IDHQGKLPVLLLGR.S                | 3 | 2.97 | 0.15 |       |
| IPI00003176 | Serine protease HTRA1 precursor                                                   | R.LHRPPVIVLQR.G                   | 2 | 2.62 | 0.30 | -4.30 |
| IPI00003176 | Serine protease HTRA1 precursor                                                   | R.LHRPPVIVLQR.G                   | 3 | 3.32 | 0.24 | -5.55 |

|             |                                                                  |                                       |   |      |      |       |
|-------------|------------------------------------------------------------------|---------------------------------------|---|------|------|-------|
| IPI00003176 | Serine protease HTRA1 precursor                                  | R.M*M*SLTSSK.A                        | 2 | 2.33 | 0.13 | -2.32 |
| IPI00003176 | Serine protease HTRA1 precursor                                  | R.RAQAGLCVCASSEPVCGSDANTYANLCQLR.A    | 3 | 3.17 | 0.19 |       |
| IPI00003176 | Serine protease HTRA1 precursor                                  | R.SSELRPGEFVVAIGSPFSLQNTVTTGIVSTTQR.G | 3 | 6.85 | 0.58 | -3.17 |
| IPI00003269 | hypothetical protein LOC345651                                   | K.IIAPPERK.Y                          | 2 | 1.97 | 0.05 | -3.56 |
| IPI00003269 | hypothetical protein LOC345651                                   | K.IKIIAPPER.K                         | 2 | 2.50 | 0.12 | 2.48  |
| IPI00003269 | hypothetical protein LOC345651                                   | K.IKIIAPPERK.Y                        | 2 | 2.55 | 0.12 | -3.24 |
| IPI00003269 | hypothetical protein LOC345651                                   | K.YSVWIGGSILASLSTFQQMWISK.Q           | 2 | 1.77 | 0.24 | -2.29 |
| IPI00003269 | hypothetical protein LOC345651                                   | R.DLTDYLM*K.I                         | 1 | 2.48 | 0.24 | -3.46 |
| IPI00003269 | hypothetical protein LOC345651                                   | R.DLTDYLM*K.I                         | 2 | 2.37 | 0.25 | -3.00 |
| IPI00003269 | hypothetical protein LOC345651                                   | R.HQGVM*VGM*GQK.D                     | 2 | 2.78 | 0.19 |       |
| IPI00003269 | hypothetical protein LOC345651                                   | R.LDLAGRDLTDYLM*K.I                   | 2 | 2.69 | 0.21 | -4.38 |
| IPI00003269 | hypothetical protein LOC345651                                   | R.LDLAGRDLTDYLM*K.I                   | 3 | 3.36 | 0.32 | -1.97 |
| IPI00003269 | hypothetical protein LOC345651                                   | R.SYELPDGQVITIGNER.F                  | 2 | 4.30 | 0.39 | -4.42 |
| IPI00003348 | Guanine nucleotide-binding protein G(I)/G(S)/G(T) subunit beta-2 | R.VSCLGVTDDGMAVATGSWDSFLK.I           | 2 | 5.50 | 0.58 | -2.87 |
| IPI00003351 | Extracellular matrix protein 1 precursor                         | A.ASEGGFTATGQR.Q                      | 1 | 2.63 | 0.39 | -3.45 |
| IPI00003351 | Extracellular matrix protein 1 precursor                         | A.ASEGGFTATGQR.Q                      | 2 | 4.18 | 0.42 | -2.33 |
| IPI00003351 | Extracellular matrix protein 1 precursor                         | A.SEGGFTATGQR.Q                       | 1 | 1.93 | 0.19 | -1.68 |
| IPI00003351 | Extracellular matrix protein 1 precursor                         | A.SEGGFTATGQR.Q                       | 2 | 3.60 | 0.38 | -1.33 |
| IPI00003351 | Extracellular matrix protein 1 precursor                         | K.ELPSLQHPNEQK.E                      | 2 | 2.88 | 0.29 | -6.48 |
| IPI00003351 | Extracellular matrix protein 1 precursor                         | K.EVGPPLPQEA VPLQK.E                  | 2 | 3.28 | 0.32 | -2.38 |
| IPI00003351 | Extracellular matrix protein 1 precursor                         | K.LLPAQLPAEK.E                        | 1 | 2.11 | 0.09 | -2.57 |
| IPI00003351 | Extracellular matrix protein 1 precursor                         | K.LLPAQLPAEK.E                        | 2 | 2.19 | 0.12 | -2.12 |
| IPI00003351 | Extracellular matrix protein 1 precursor                         | K.LLPAQLPAEKEVGPPLPQEA VPLQK.E        | 2 | 4.83 | 0.53 | -3.06 |
| IPI00003351 | Extracellular matrix protein 1 precursor                         | K.LLPAQLPAEKEVGPPLPQEA VPLQK.E        | 3 | 4.02 | 0.53 | -5.04 |
| IPI00003351 | Extracellular matrix protein 1 precursor                         | K.LLPAQLPAEKEVGPPLPQEA VPLQK.E        | 4 | 4.13 | 0.39 | -2.13 |
| IPI00003351 | Extracellular matrix protein 1 precursor                         | K.LVWEEAM*SR.F                        | 2 | 3.09 | 0.35 | -2.48 |
| IPI00003351 | Extracellular matrix protein 1 precursor                         | L.PAQLPAEKEVGPPLPQEA VPLQK.E          | 3 | 6.33 | 0.55 | -2.34 |
| IPI00003351 | Extracellular matrix protein 1 precursor                         | R.ACPSHQPDISSGLELPFPPGVPTLDNIK.N      | 2 | 4.25 | 0.43 | -4.35 |
| IPI00003351 | Extracellular matrix protein 1 precursor                         | R.ACPSHQPDISSGLELPFPPGVPTLDNIK.N      | 3 | 5.33 | 0.36 | -7.70 |
| IPI00003351 | Extracellular matrix protein 1 precursor                         | R.ACPSHQPDISSGLELPFPPGVPTLDNIK.N      | 4 | 3.82 | 0.31 | -2.70 |
| IPI00003351 | Extracellular matrix protein 1 precursor                         | R.APYPNYDRDILTIDIGR.V                 | 3 | 2.60 | 0.28 | -2.01 |
| IPI00003351 | Extracellular matrix protein 1 precursor                         | R.CCDLPFPEQACCAEEEEKLTFFINDLCGPR.R    | 3 | 3.87 | 0.47 | -4.23 |
| IPI00003351 | Extracellular matrix protein 1 precursor                         | R.CCDLPFPEQACCAEEEEKLTFFINDLCGPR.R    | 4 | 3.28 | 0.35 | -5.73 |
| IPI00003351 | Extracellular matrix protein 1 precursor                         | R.ELLALIQLER.E                        | 1 | 3.11 | 0.20 | -4.28 |
| IPI00003351 | Extracellular matrix protein 1 precursor                         | R.ELLALIQLER.E                        | 2 | 4.01 | 0.27 | -5.45 |
| IPI00003351 | Extracellular matrix protein 1 precursor                         | R.FCEAEFSVK.T                         | 1 | 2.23 | 0.25 | -3.77 |
| IPI00003351 | Extracellular matrix protein 1 precursor                         | R.FCEAEFSVK.T                         | 2 | 2.94 | 0.33 | -2.10 |
| IPI00003351 | Extracellular matrix protein 1 precursor                         | R.LDGFPPGRPSPDNLNQCIPNR.Q             | 3 | 4.89 | 0.49 | -3.46 |
| IPI00003351 | Extracellular matrix protein 1 precursor                         | R.NIWRDPALCCYLSPGDEQVNCFNINYLR.N      | 3 | 6.90 | 0.63 | -2.70 |
| IPI00003351 | Extracellular matrix protein 1 precursor                         | R.NLPATDPLQR.E                        | 2 | 2.29 | 0.20 | -3.06 |
| IPI00003351 | Extracellular matrix protein 1 precursor                         | R.NVALVSGDTENAK.G                     | 1 | 3.20 | 0.43 | -1.69 |

|             |                                          |                                            |   |      |      |       |
|-------------|------------------------------------------|--------------------------------------------|---|------|------|-------|
| IPI00003351 | Extracellular matrix protein 1 precursor | R.NVALVSGDTENAK.G                          | 2 | 4.50 | 0.47 | -1.67 |
| IPI00003351 | Extracellular matrix protein 1 precursor | R.QGETLNFLEIGYSR.C                         | 2 | 4.99 | 0.47 | -5.28 |
| IPI00003351 | Extracellular matrix protein 1 precursor | R.QLRPEHFQEYGYAAPSPPLSR.S                  | 2 | 2.82 | 0.33 | -2.08 |
| IPI00003351 | Extracellular matrix protein 1 precursor | R.QLRPEHFQEYGYAAPSPPLSR.S                  | 3 | 3.81 | 0.24 | -1.15 |
| IPI00003351 | Extracellular matrix protein 1 precursor | R.RAPYPNYDR.D                              | 2 | 3.12 | 0.25 | -2.89 |
| IPI00003351 | Extracellular matrix protein 1 precursor | R.RAPYPNYDRDILTIDIGR.V                     | 3 | 3.27 | 0.19 | -3.37 |
| IPI00003351 | Extracellular matrix protein 1 precursor | R.SLPM*DHPDSSQHGPPFEGQSQVQPPPSQEATPLQQEK.L | 3 | 5.11 | 0.44 | -3.15 |
| IPI00003351 | Extracellular matrix protein 1 precursor | R.SLPM*DHPDSSQHGPPFEGQSQVQPPPSQEATPLQQEK.L | 4 | 4.16 | 0.41 | -4.11 |
| IPI00003353 | Neuronal protein 3.1                     | R.LPKGRLPVPKEVNR.K                         | 3 | 2.53 | 0.23 |       |
| IPI00003362 | HSPA5 protein                            | K.DAGTIAGLNVN*R.I                          | 2 | 4.17 | 0.31 | -4.62 |
| IPI00003362 | HSPA5 protein                            | K.DNHLLGTFDLTGIPPAPR.G                     | 3 | 2.90 | 0.26 | -3.23 |
| IPI00003362 | HSPA5 protein                            | K.ELEEIVQPIISK.L                           | 2 | 3.62 | 0.33 | -2.70 |
| IPI00003362 | HSPA5 protein                            | K.KKELEEIVQPIISK.L                         | 2 | 5.20 | 0.34 | -4.19 |
| IPI00003362 | HSPA5 protein                            | K.KKELEEIVQPIISK.L                         | 3 | 3.50 | 0.09 | -3.21 |
| IPI00003362 | HSPA5 protein                            | K.KKELEEIVQPIISK.L                         | 4 | 2.83 | 0.17 | -4.51 |
| IPI00003362 | HSPA5 protein                            | K.KSQIFSTASDNQPTVTIK.V                     | 3 | 3.05 | 0.25 | -3.03 |
| IPI00003362 | HSPA5 protein                            | K.NGRVEIANDQGNR.I                          | 2 | 2.21 | 0.08 | -3.02 |
| IPI00003362 | HSPA5 protein                            | K.NKITITNDQNR.L                            | 2 | 2.86 | 0.20 | -1.66 |
| IPI00003362 | HSPA5 protein                            | K.NQLTSNPENTVFDAK.R                        | 2 | 3.66 | 0.42 | -1.55 |
| IPI00003362 | HSPA5 protein                            | K.NQLTSNPENTVFDAK.R.L                      | 2 | 3.79 | 0.49 | -1.19 |
| IPI00003362 | HSPA5 protein                            | K.SQIFSTASDNQPTVTIK.V                      | 2 | 5.17 | 0.48 | -2.61 |
| IPI00003362 | HSPA5 protein                            | K.SQIFSTASDNQPTVTIK.V                      | 3 | 3.36 | 0.25 | -1.00 |
| IPI00003362 | HSPA5 protein                            | K.TFAPEEISAM*VLTK.M                        | 2 | 4.24 | 0.30 | -3.32 |
| IPI00003362 | HSPA5 protein                            | K.TFAPEEISAMVLTK.M                         | 2 | 3.09 | 0.27 |       |
| IPI00003362 | HSPA5 protein                            | K.TKPVIQVDIGGGQTK.T                        | 2 | 3.55 | 0.26 | -3.33 |
| IPI00003362 | HSPA5 protein                            | K.TKPVIQVDIGGGQTK.T                        | 3 | 3.67 | 0.27 | -3.05 |
| IPI00003362 | HSPA5 protein                            | K.VLESDLK.K                                | 1 | 1.88 | 0.12 | -4.20 |
| IPI00003362 | HSPA5 protein                            | K.VLESDLKKSDIDEIVLVGGSTR.I                 | 3 | 4.15 | 0.30 | -1.98 |
| IPI00003362 | HSPA5 protein                            | K.VLESDLKKSDIDEIVLVGGSTR.I                 | 4 | 2.26 | 0.10 | -2.09 |
| IPI00003362 | HSPA5 protein                            | K.VTHAVVTVPAYFNDAQR.Q                      | 3 | 4.25 | 0.27 | -2.82 |
| IPI00003362 | HSPA5 protein                            | K.VYEGERPLTK.D                             | 2 | 2.85 | 0.37 | -3.30 |
| IPI00003362 | HSPA5 protein                            | K.VYEGERPLTKDNHLLGTFDLTGIPPAPR.G           | 3 | 3.77 | 0.34 | -3.89 |
| IPI00003362 | HSPA5 protein                            | R.AKFEELNM*DLFR.S                          | 2 | 4.01 | 0.41 | -4.50 |
| IPI00003362 | HSPA5 protein                            | R.AKFEELNM*DLFR.S                          | 3 | 3.89 | 0.27 | -2.29 |
| IPI00003362 | HSPA5 protein                            | R.IDTRNELESYAYSLK.N                        | 2 | 2.82 | 0.10 | -2.42 |
| IPI00003362 | HSPA5 protein                            | R.IDTRNELESYAYSLK.N                        | 3 | 4.57 | 0.30 | -2.45 |
| IPI00003362 | HSPA5 protein                            | R.IEIESFFEGEDFSETLTR.A                     | 2 | 5.49 | 0.49 | -2.33 |
| IPI00003362 | HSPA5 protein                            | R.IINEPTAAAIYGLDKR.E                       | 2 | 4.60 | 0.49 | -2.05 |
| IPI00003362 | HSPA5 protein                            | R.IINEPTAAAIYGLDKR.E                       | 3 | 2.56 | 0.07 | -2.33 |
| IPI00003362 | HSPA5 protein                            | R.ITPSYVAFTPEGER.L                         | 2 | 3.52 | 0.42 | -2.76 |
| IPI00003362 | HSPA5 protein                            | R.LIGDAAK.N                                | 1 | 1.96 | 0.12 | -2.67 |
| IPI00003362 | HSPA5 protein                            | R.M*VNDAEKFAEEDKK.L                        | 3 | 3.07 | 0.17 | -2.18 |

|             |                                                                      |                                      |   |      |      |       |
|-------------|----------------------------------------------------------------------|--------------------------------------|---|------|------|-------|
| IPI00003362 | HSPA5 protein                                                        | R.M*VNDAEKFAEEDKK.L                  | 4 | 2.52 | 0.25 | -6.35 |
| IPI00003362 | HSPA5 protein                                                        | R.NTVVPTKK.S                         | 2 | 1.99 | 0.07 | -3.94 |
| IPI00003362 | HSPA5 protein                                                        | R.VM*EHFIK.L                         | 2 | 2.30 | 0.06 | -0.64 |
| IPI00003362 | HSPA5 protein                                                        | W.NDPSVQQDIK.F                       | 2 | 3.04 | 0.31 | -5.02 |
| IPI00003363 | Isoform 1 of Protein phosphatase 1 regulatory subunit 1B             | R.LSEHSSPEEEASPHQR.A                 | 3 | 4.94 | 0.31 | -0.14 |
| IPI00003366 | Isoform TrkB of BDNF/NT-3 growth factors receptor precursor          | K.GNPKPALQWFYNGAILNESK.Y             | 2 | 5.05 | 0.52 | -4.03 |
| IPI00003366 | Isoform TrkB of BDNF/NT-3 growth factors receptor precursor          | K.GNPKPALQWFYNGAILNESK.Y             | 3 | 5.18 | 0.52 | -3.92 |
| IPI00003366 | Isoform TrkB of BDNF/NT-3 growth factors receptor precursor          | K.NSNLQHINFTR.N                      | 2 | 3.33 | 0.40 | -2.99 |
| IPI00003366 | Isoform TrkB of BDNF/NT-3 growth factors receptor precursor          | K.NSNLQHINFTR.N                      | 3 | 1.52 | 0.14 | -4.25 |
| IPI00003366 | Isoform TrkB of BDNF/NT-3 growth factors receptor precursor          | K.RLEIINEDDVEAYVGLR.N                | 3 | 3.59 | 0.30 | -4.64 |
| IPI00003366 | Isoform TrkB of BDNF/NT-3 growth factors receptor precursor          | K.SITLSCSVAGDPVPMN*YWDVGNLVSK.H      | 2 | 4.58 | 0.54 | -3.86 |
| IPI00003366 | Isoform TrkB of BDNF/NT-3 growth factors receptor precursor          | K.SITLSCSVAGDPVPMN*YWDVGNLVSK.H      | 3 | 2.51 | 0.15 | -3.89 |
| IPI00003366 | Isoform TrkB of BDNF/NT-3 growth factors receptor precursor          | K.SSPDTQDLYCLNESSK.N                 | 2 | 5.41 | 0.58 | -2.41 |
| IPI00003366 | Isoform TrkB of BDNF/NT-3 growth factors receptor precursor          | R.ITNISSDDSGK.Q                      | 2 | 2.84 | 0.17 | -2.53 |
| IPI00003366 | Isoform TrkB of BDNF/NT-3 growth factors receptor precursor          | R.IWCSDPSPGIVAFPR.L                  | 2 | 4.73 | 0.51 | -3.95 |
| IPI00003366 | Isoform TrkB of BDNF/NT-3 growth factors receptor precursor          | R.IWCSDPSPGIVAFPR.L                  | 3 | 4.95 | 0.45 | -2.66 |
| IPI00003366 | Isoform TrkB of BDNF/NT-3 growth factors receptor precursor          | R.LEIINEDDVEAYVGLR.N                 | 2 | 3.30 | 0.31 | -8.16 |
| IPI00003384 | Isoform 1 of Cadherin EGF LAG seven-pass G-type receptor 1 precursor | R.DANSVITYQLTGGNTR.N                 | 2 | 2.88 | 0.08 |       |
| IPI00003391 | Teneurin-1                                                           | R.ASEASLNSPR.G                       | 2 | 2.81 | 0.14 | -2.42 |
| IPI00003391 | Teneurin-1                                                           | R.DYDVVAGR.W                         | 2 | 2.52 | 0.25 | -5.55 |
| IPI00003392 | Transmembrane protein 5                                              | K.SM*GAPFIFIK.N                      | 2 | 2.50 | 0.28 | -1.38 |
| IPI00003406 | Isoform 1 of Drebrin                                                 | R.LELLAAYEEVIREESAADWALYTYEDGSDDLK.L | 3 | 3.89 | 0.43 | -2.75 |
| IPI00003441 | Isoform 1 of Protein C1orf9 precursor                                | K.ILAAPEAK.S                         | 2 | 2.42 | 0.16 | -2.80 |
| IPI00003441 | Isoform 1 of Protein C1orf9 precursor                                | R.EGPINAESLGK.S                      | 2 | 1.91 | 0.20 | -2.74 |
| IPI00003470 | Ig kappa chain V-I region Wes                                        | -.DIQM*TQSPSSVSASVGDR.V              | 2 | 5.81 | 0.37 |       |
| IPI00003470 | Ig kappa chain V-I region Wes                                        | -.DIQM*TQSPSSVSASVGDR.V              | 3 | 4.33 | 0.36 |       |
| IPI00003470 | Ig kappa chain V-I region Wes                                        | -.DIQMTQSPSSVSASVGDR.V               | 2 | 4.26 | 0.10 |       |
| IPI00003470 | Ig kappa chain V-I region Wes                                        | -.DIQMTQSPSSVSASVGDR.V               | 3 | 2.97 | 0.13 |       |

|             |                                                                  |                                 |   |      |      |       |
|-------------|------------------------------------------------------------------|---------------------------------|---|------|------|-------|
| IPI00003527 | Ezrin-radixin-moesin-binding phosphoprotein 50                   | R.AQEAPGQAEPPAAAEVQGAGNENEPR.E  | 3 | 2.70 | 0.20 | -2.79 |
| IPI00003527 | Ezrin-radixin-moesin-binding phosphoprotein 50                   | R.SVDPDSPAASGLR.A               | 2 | 3.65 | 0.35 | -2.61 |
| IPI00003590 | Isoform 1 of Sulfhydryl oxidase 1 precursor                      | K.AHFSPSNIILDFPAAGSAAR.R        | 2 | 5.58 | 0.58 | -3.66 |
| IPI00003590 | Isoform 1 of Sulfhydryl oxidase 1 precursor                      | K.AHFSPSNIILDFPAAGSAAR.R        | 3 | 4.87 | 0.55 | -3.00 |
| IPI00003590 | Isoform 1 of Sulfhydryl oxidase 1 precursor                      | K.FGVTDFPSCYLLFR.N              | 2 | 2.89 | 0.29 | -4.31 |
| IPI00003590 | Isoform 1 of Sulfhydryl oxidase 1 precursor                      | K.IPYSFFK.T                     | 2 | 1.71 | 0.06 | -2.02 |
| IPI00003590 | Isoform 1 of Sulfhydryl oxidase 1 precursor                      | K.TALDDRKEGAVLAK.K              | 3 | 2.17 | 0.15 | -2.38 |
| IPI00003590 | Isoform 1 of Sulfhydryl oxidase 1 precursor                      | R.AAPGQEPPEHM*AELQR.N           | 2 | 3.67 | 0.44 | -2.77 |
| IPI00003590 | Isoform 1 of Sulfhydryl oxidase 1 precursor                      | R.DTGAALLAESR.A                 | 2 | 3.84 | 0.28 | -2.50 |
| IPI00003590 | Isoform 1 of Sulfhydryl oxidase 1 precursor                      | R.EVALDLSQHK.G                  | 2 | 2.86 | 0.21 | -1.60 |
| IPI00003590 | Isoform 1 of Sulfhydryl oxidase 1 precursor                      | R.KFGVTDFPSCYLLFR.N             | 3 | 3.63 | 0.30 | -2.59 |
| IPI00003590 | Isoform 1 of Sulfhydryl oxidase 1 precursor                      | R.LAGAPSEDPQFPK.V               | 2 | 3.53 | 0.40 | -4.10 |
| IPI00003590 | Isoform 1 of Sulfhydryl oxidase 1 precursor                      | R.LDVPVWDVEATLNFLK.A            | 2 | 4.95 | 0.50 | -5.37 |
| IPI00003590 | Isoform 1 of Sulfhydryl oxidase 1 precursor                      | R.LDVPVWDVEATLNFLK.A            | 3 | 6.31 | 0.53 | -4.39 |
| IPI00003590 | Isoform 1 of Sulfhydryl oxidase 1 precursor                      | R.NNEEYLALIFEK.G                | 2 | 4.20 | 0.37 | -5.06 |
| IPI00003590 | Isoform 1 of Sulfhydryl oxidase 1 precursor                      | R.RVLNTEANVVR.K                 | 2 | 3.49 | 0.33 | -2.97 |
| IPI00003590 | Isoform 1 of Sulfhydryl oxidase 1 precursor                      | R.RVLNTEANVVR.K                 | 3 | 2.69 | 0.18 | -2.76 |
| IPI00003590 | Isoform 1 of Sulfhydryl oxidase 1 precursor                      | R.SALYSPSDPLTLQADTVR.G          | 3 | 6.06 | 0.54 | -3.96 |
| IPI00003590 | Isoform 1 of Sulfhydryl oxidase 1 precursor                      | R.SALYSPSDPLTLQADTVRGAVLGSR.S   | 3 | 2.36 | 0.15 | -2.88 |
| IPI00003590 | Isoform 1 of Sulfhydryl oxidase 1 precursor                      | R.SFYTAYLQR.L                   | 1 | 1.85 | 0.21 | -2.12 |
| IPI00003590 | Isoform 1 of Sulfhydryl oxidase 1 precursor                      | R.SFYTAYLQR.L                   | 2 | 2.77 | 0.24 | -1.56 |
| IPI00003590 | Isoform 1 of Sulfhydryl oxidase 1 precursor                      | R.VLNTEANVVR.K                  | 1 | 1.31 | 0.11 | -2.20 |
| IPI00003590 | Isoform 1 of Sulfhydryl oxidase 1 precursor                      | R.VPVLN*ESR.S                   | 2 | 2.48 | 0.20 | -1.41 |
| IPI00003648 | Isoform Delta of Poliovirus receptor-related protein 1 precursor | K.ITQVTWQK.S                    | 2 | 2.50 | 0.10 | -0.49 |
| IPI00003648 | Isoform Delta of Poliovirus receptor-related protein 1 precursor | K.PTNWIEGTQAVLR.A               | 2 | 4.28 | 0.40 | -3.74 |
| IPI00003648 | Isoform Delta of Poliovirus receptor-related protein 1 precursor | K.QNVAIYNPSM*GVSVLAPYR.E        | 2 | 5.43 | 0.52 | -2.71 |
| IPI00003648 | Isoform Delta of Poliovirus receptor-related protein 1 precursor | R.LELEDEGVYICEFATFPTGNR.E       | 2 | 4.34 | 0.53 | -4.73 |
| IPI00003648 | Isoform Delta of Poliovirus receptor-related protein 1 precursor | R.LKGEAEYQEIR.N                 | 2 | 3.43 | 0.34 | -3.87 |
| IPI00003648 | Isoform Delta of Poliovirus receptor-related protein 1 precursor | R.LKGEAEYQEIR.N                 | 3 | 3.33 | 0.13 | -3.74 |
| IPI00003648 | Isoform Delta of Poliovirus receptor-related protein 1 precursor | R.TLFFKGPINYSLAGTYICEATNPIGTR.S | 3 | 3.22 | 0.26 | -2.38 |
| IPI00003648 | Isoform Delta of Poliovirus receptor-related protein 1 precursor | R.VEFLRPSFTDGTIR.L              | 2 | 2.56 | 0.20 | -3.39 |
| IPI00003648 | Isoform Delta of Poliovirus receptor-related protein 1 precursor | R.VEFLRPSFTDGTIR.L              | 3 | 3.22 | 0.39 | -2.66 |
| IPI00003799 | Isoform 2 of Heme-binding protein 2                              | K.LNSYIQGK.N                    | 2 | 2.10 | 0.07 | 2.75  |

|             |                                                                         |                                    |   |      |      |       |
|-------------|-------------------------------------------------------------------------|------------------------------------|---|------|------|-------|
| IPI00003799 | Isoform 2 of Heme-binding protein 2                                     | K.NQEQLLTLASILR.E                  | 2 | 4.05 | 0.32 | -2.86 |
| IPI00003799 | Isoform 2 of Heme-binding protein 2                                     | R.SFDGFSSAQK.N                     | 2 | 1.92 | 0.18 | -3.80 |
| IPI00003802 | Alpha-mannosidase 2                                                     | K.DKLTYSYSPDTFLEM*DLK.Q            | 3 | 4.22 | 0.36 | -4.01 |
| IPI00003802 | Alpha-mannosidase 2                                                     | K.DWVVVDYGT.R.L                    | 2 | 2.82 | 0.22 | -3.01 |
| IPI00003802 | Alpha-mannosidase 2                                                     | K.FIWSEISYLSK.W                    | 2 | 2.09 | 0.13 | -2.19 |
| IPI00003802 | Alpha-mannosidase 2                                                     | K.FLSSSLYALTEAR.R                  | 2 | 3.57 | 0.39 | -3.68 |
| IPI00003802 | Alpha-mannosidase 2                                                     | K.FSSPTLELQGEFSPQLQSSLPDIHLVNL.R.T | 3 | 6.08 | 0.54 | -3.60 |
| IPI00003802 | Alpha-mannosidase 2                                                     | K.GTGLFCSTTQGK.I                   | 2 | 3.18 | 0.35 | -1.64 |
| IPI00003802 | Alpha-mannosidase 2                                                     | K.IIGNSAFLILK.D                    | 2 | 3.56 | 0.25 | -4.07 |
| IPI00003802 | Alpha-mannosidase 2                                                     | K.ILESASSNSHLADYVLYK.N             | 2 | 4.65 | 0.51 | -3.06 |
| IPI00003802 | Alpha-mannosidase 2                                                     | K.ILESASSNSHLADYVLYK.N             | 3 | 2.84 | 0.25 | -2.39 |
| IPI00003802 | Alpha-mannosidase 2                                                     | K.INKFLSSSLYALTEAR.R               | 3 | 3.78 | 0.26 | -3.98 |
| IPI00003802 | Alpha-mannosidase 2                                                     | K.IQFGTLSDFFDALDK.A                | 2 | 3.56 | 0.27 | -5.81 |
| IPI00003802 | Alpha-mannosidase 2                                                     | K.IQFGTLSDFFDALDKAETQR.D           | 2 | 5.18 | 0.51 | -5.89 |
| IPI00003802 | Alpha-mannosidase 2                                                     | K.IQFGTLSDFFDALDKAETQR.D           | 3 | 3.75 | 0.40 | -4.14 |
| IPI00003802 | Alpha-mannosidase 2                                                     | K.ITANLFR.I                        | 2 | 2.05 | 0.10 | -2.23 |
| IPI00003802 | Alpha-mannosidase 2                                                     | K.LPLQANVYPM*TTM*AYIQDAK.H         | 2 | 4.09 | 0.35 | 0.37  |
| IPI00003802 | Alpha-mannosidase 2                                                     | K.LPLQANVYPM*TTM*AYIQDAK.H         | 3 | 4.44 | 0.38 | -6.23 |
| IPI00003802 | Alpha-mannosidase 2                                                     | K.NKVEDSGIFTIK.N                   | 2 | 2.89 | 0.14 | -2.23 |
| IPI00003802 | Alpha-mannosidase 2                                                     | K.NKVEDSGIFTIK.N                   | 3 | 3.36 | 0.07 | -2.87 |
| IPI00003802 | Alpha-mannosidase 2                                                     | K.SGAYLFLPDGNAKPYVYTPPFVR.V        | 3 | 4.01 | 0.41 | -3.20 |
| IPI00003802 | Alpha-mannosidase 2                                                     | K.TFNDYFR.D                        | 2 | 2.27 | 0.11 | -2.33 |
| IPI00003802 | Alpha-mannosidase 2                                                     | K.TLEFFWR.Q                        | 2 | 2.78 | 0.19 | -2.26 |
| IPI00003802 | Alpha-mannosidase 2                                                     | K.VKIQFGTLSDFFDALDKAETQR.D         | 3 | 4.31 | 0.34 | -4.16 |
| IPI00003802 | Alpha-mannosidase 2                                                     | K.VKIQFGTLSDFFDALDKAETQR.D         | 4 | 4.62 | 0.34 | -2.74 |
| IPI00003802 | Alpha-mannosidase 2                                                     | K.VLLAPLGDDFR.Y                    | 2 | 2.92 | 0.31 | -1.84 |
| IPI00003802 | Alpha-mannosidase 2                                                     | R.DKTQYIFNNM*VLK.L                 | 2 | 3.47 | 0.19 | -1.25 |
| IPI00003802 | Alpha-mannosidase 2                                                     | R.DSVINLSESVEDGPK.S                | 2 | 4.63 | 0.29 | -3.72 |
| IPI00003802 | Alpha-mannosidase 2                                                     | R.FDQTGLM*K.Q                      | 2 | 2.48 | 0.14 | -2.27 |
| IPI00003802 | Alpha-mannosidase 2                                                     | R.FYTDLNGYQIQPR.M                  | 2 | 3.28 | 0.25 | -7.31 |
| IPI00003802 | Alpha-mannosidase 2                                                     | R.GLEQGIQDNK.I                     | 2 | 3.10 | 0.33 | -1.04 |
| IPI00003802 | Alpha-mannosidase 2                                                     | R.GLEQGIQDNKITANLFR.I              | 2 | 3.50 | 0.43 | -2.35 |
| IPI00003802 | Alpha-mannosidase 2                                                     | R.IYSEVTCFFDHVTHR.V                | 4 | 2.84 | 0.13 | -3.01 |
| IPI00003802 | Alpha-mannosidase 2                                                     | R.LFHSLM*VLEK.I                    | 3 | 2.74 | 0.21 | -4.57 |
| IPI00003802 | Alpha-mannosidase 2                                                     | R.LM*QDDNRGLEQGIQDNK.I             | 3 | 4.08 | 0.24 | -2.52 |
| IPI00003802 | Alpha-mannosidase 2                                                     | R.NLGLFQHHDAITGTAK.D               | 2 | 3.73 | 0.54 | -2.51 |
| IPI00003802 | Alpha-mannosidase 2                                                     | R.NLGLFQHHDAITGTAK.D               | 3 | 2.38 | 0.30 | -2.00 |
| IPI00003802 | Alpha-mannosidase 2                                                     | R.SGWAIIDPFQHSPTM*AYLLNR.A         | 3 | 2.84 | 0.28 | -2.89 |
| IPI00003802 | Alpha-mannosidase 2                                                     | R.YLVVYNPLEQDR.I                   | 2 | 3.60 | 0.34 | -4.70 |
| IPI00003807 | Lysosomal acid phosphatase precursor                                    | R.LQGGVLLAQIR.K                    | 2 | 3.35 | 0.30 | -1.62 |
| IPI00003814 | Isoform 1 of Dual specificity mitogen-activated protein kinase kinase 6 | -.MELGRGAYGVVEKMRHVPSGQIMAVKR.I    | 3 | 2.55 | 0.16 | -3.20 |

|             |                                                |                                           |   |      |      |       |
|-------------|------------------------------------------------|-------------------------------------------|---|------|------|-------|
| IPI00003865 | Isoform 1 of Heat shock cognate 71 kDa protein | K.DAGTIAGLNVL.R.I                         | 2 | 3.71 | 0.22 | -2.68 |
| IPI00003865 | Isoform 1 of Heat shock cognate 71 kDa protein | K.ITITNDKGR.L                             | 1 | 2.08 | 0.20 | -3.55 |
| IPI00003865 | Isoform 1 of Heat shock cognate 71 kDa protein | K.ITITNDKGR.L                             | 2 | 2.65 | 0.24 | -2.81 |
| IPI00003865 | Isoform 1 of Heat shock cognate 71 kDa protein | K.NSLESYAFNM*K.A                          | 2 | 3.74 | 0.46 | -2.15 |
| IPI00003865 | Isoform 1 of Heat shock cognate 71 kDa protein | K.VQVEYKGETK.S                            | 2 | 2.40 | 0.21 | -2.65 |
| IPI00003865 | Isoform 1 of Heat shock cognate 71 kDa protein | R.LIGDAAK.N                               | 1 | 1.96 | 0.12 | -2.67 |
| IPI00003865 | Isoform 1 of Heat shock cognate 71 kDa protein | R.M*VQEAKEYK.A                            | 2 | 2.07 | 0.11 | -2.60 |
| IPI00003865 | Isoform 1 of Heat shock cognate 71 kDa protein | R.NVLIFDLGGGTFDVSILTIEDGIFEVK.S           | 3 | 3.32 | 0.29 | -3.03 |
| IPI00003865 | Isoform 1 of Heat shock cognate 71 kDa protein | R.TTPSYVAFTDTER.L                         | 2 | 2.87 | 0.41 | -0.70 |
| IPI00003907 | Isoform 1 of Protocadherin gamma C5 precursor  | A.SLANPVLESTPVGTVVGLFNVR.D                | 2 | 4.66 | 0.51 | -2.91 |
| IPI00003907 | Isoform 1 of Protocadherin gamma C5 precursor  | A.SLANPVLESTPVGTVVGLFNVR.D                | 3 | 4.62 | 0.39 | -4.00 |
| IPI00003907 | Isoform 1 of Protocadherin gamma C5 precursor  | L.EDDSDTQQVVVLR.D                         | 2 | 3.75 | 0.30 | -3.98 |
| IPI00003907 | Isoform 1 of Protocadherin gamma C5 precursor  | R.ALLEDDSDTQQVVVLR.D                      | 2 | 4.74 | 0.30 | -4.37 |
| IPI00003907 | Isoform 1 of Protocadherin gamma C5 precursor  | R.ALLEDDSDTQQVVVLR.D                      | 3 | 2.77 | 0.23 | -3.26 |
| IPI00003907 | Isoform 1 of Protocadherin gamma C5 precursor  | R.NLFGDLPSSGAIHVLGPIDFEESR.F              | 3 | 3.67 | 0.29 |       |
| IPI00003907 | Isoform 1 of Protocadherin gamma C5 precursor  | R.VGIPENAPIGTL.LL.L                       | 2 | 2.62 | 0.24 | -3.96 |
| IPI00003907 | Isoform 1 of Protocadherin gamma C5 precursor  | R.YSVVEESEPGTLVGNVAQDLGLK.M               | 2 | 5.14 | 0.48 |       |
| IPI00003907 | Isoform 1 of Protocadherin gamma C5 precursor  | R.YSVVEESEPGTLVGNVAQDLGLK.M               | 3 | 3.40 | 0.21 |       |
| IPI00003919 | Glutaminyl-peptide cyclotransferase precursor  | K.M*ASTPHPPGAR.G                          | 2 | 3.21 | 0.26 |       |
| IPI00003919 | Glutaminyl-peptide cyclotransferase precursor  | R.LQAIEHELHELGLLK.D                       | 2 | 3.32 | 0.28 |       |
| IPI00003919 | Glutaminyl-peptide cyclotransferase precursor  | R.LQAIEHELHELGLLK.D                       | 3 | 4.98 | 0.24 |       |
| IPI00003919 | Glutaminyl-peptide cyclotransferase precursor  | R.LQAIEHELHELGLLKDHSLLEGR.Y               | 3 | 4.98 | 0.28 |       |
| IPI00003919 | Glutaminyl-peptide cyclotransferase precursor  | R.QIAEGTSISEM*WQNDLQPLLIER.Y              | 3 | 3.57 | 0.16 |       |
| IPI00003919 | Glutaminyl-peptide cyclotransferase precursor  | R.SFSNIISTLNPTAK.R                        | 1 | 3.24 | 0.18 |       |
| IPI00003919 | Glutaminyl-peptide cyclotransferase precursor  | R.SFSNIISTLNPTAK.R                        | 2 | 4.00 | 0.27 |       |
| IPI00003919 | Glutaminyl-peptide cyclotransferase precursor  | R.SFSNIISTLNPTAKR.H                       | 2 | 3.11 | 0.10 |       |
| IPI00003919 | Glutaminyl-peptide cyclotransferase precursor  | R.VFVGATDSAVPCAM*M*L.LAR.A                | 2 | 3.55 | 0.32 |       |
| IPI00003919 | Glutaminyl-peptide cyclotransferase precursor  | R.VFVGATDSAVPCAMM.LAR.A                   | 2 | 5.26 | 0.34 |       |
| IPI00003919 | Glutaminyl-peptide cyclotransferase precursor  | R.VFVGATDSAVPCAMM.LAR.A                   | 3 | 3.48 | 0.10 |       |
| IPI00003919 | Glutaminyl-peptide cyclotransferase precursor  | R.YFQNYSYGGVIQDDHIPFLR.R                  | 2 | 3.55 | 0.09 |       |
| IPI00003919 | Glutaminyl-peptide cyclotransferase precursor  | R.YFQNYSYGGVIQDDHIPFLR.R                  | 3 | 3.50 | 0.34 |       |
| IPI00003919 | Glutaminyl-peptide cyclotransferase precursor  | R.YFQNYSYGGVIQDDHIPFLR.R.G                | 3 | 3.85 | 0.27 |       |
| IPI00003921 | Isoform 1 of Protein 4.1                       | C.SFATLALLGSYTIQSELGDYDPELHGVDYVSDFK.L    | 3 | 4.31 | 0.36 | -3.15 |
| IPI00003921 | Isoform 1 of Protein 4.1                       | F.ATLALLGSYTIQSELGDYDPELHGVDYVSDFK.L      | 3 | 4.53 | 0.45 | -4.74 |
| IPI00003921 | Isoform 1 of Protein 4.1                       | K.AKDLGVDIILGVCSSGLLVYK.D                 | 3 | 3.99 | 0.40 | -5.99 |
| IPI00003921 | Isoform 1 of Protein 4.1                       | K.DLEGVDIILGVCSSGLLVYK.D                  | 2 | 6.05 | 0.62 | -6.47 |
| IPI00003921 | Isoform 1 of Protein 4.1                       | K.DLEGVDIILGVCSSGLLVYK.D                  | 3 | 5.00 | 0.60 | -5.83 |
| IPI00003921 | Isoform 1 of Protein 4.1                       | K.RVCEHLNLLLEEDYFGLAIWDNATSK.T            | 3 | 4.52 | 0.44 | -2.96 |
| IPI00003921 | Isoform 1 of Protein 4.1                       | K.RVCEHLNLLLEEDYFGLAIWDNATSK.T            | 4 | 3.22 | 0.19 | -3.68 |
| IPI00003921 | Isoform 1 of Protein 4.1                       | K.VSLDDTTYECVVEK.H                        | 2 | 3.44 | 0.43 | -2.45 |
| IPI00003921 | Isoform 1 of Protein 4.1                       | K.VVQHETEIADE.-                           | 2 | 2.29 | 0.20 | -2.82 |
| IPI00003921 | Isoform 1 of Protein 4.1                       | R.LPCSFATLALLGSYTIQSELGDYDPELHGVDYVSDFK.L | 3 | 6.29 | 0.60 | -6.34 |

|             |                                                                   |                                           |   |      |      |       |
|-------------|-------------------------------------------------------------------|-------------------------------------------|---|------|------|-------|
| IPI00003921 | Isoform 1 of Protein 4.1                                          | R.LPCSFATLALLGSYTIQSELGDYDPELHGVDYVSDFK.L | 4 | 5.38 | 0.48 | -4.25 |
| IPI00003921 | Isoform 1 of Protein 4.1                                          | R.PTSAPAITQGQVAEGGVLDASAK.K               | 2 | 5.13 | 0.55 | -6.65 |
| IPI00003921 | Isoform 1 of Protein 4.1                                          | R.SPRPTSAPAITQGQVAEGGVLDASAK.K            | 3 | 5.05 | 0.54 | -3.29 |
| IPI00003921 | Isoform 1 of Protein 4.1                                          | R.VCEHLNLLLEEDYFGLAIWDNATSK.T             | 2 | 6.26 | 0.62 | -5.51 |
| IPI00003921 | Isoform 1 of Protein 4.1                                          | R.VCEHLNLLLEEDYFGLAIWDNATSK.T             | 3 | 5.55 | 0.50 | -4.44 |
| IPI00003933 | hydroxyacyl glutathione hydrolase isoform 1                       | R.HVEPGNAAIR.E                            | 2 | 1.81 | 0.16 | -2.30 |
| IPI00003971 | Isoform RTN1-A of Reticulon-1                                     | K.GATPAPQAGEPSPGLGAR.A                    | 2 | 3.67 | 0.46 | -3.44 |
| IPI00004047 | Isoform 1 of Exostosin-2                                          | K.FASVFGTM*PLK.V                          | 2 | 2.94 | 0.19 | -1.51 |
| IPI00004047 | Isoform 1 of Exostosin-2                                          | R.ACLFVPSIDVLNQNTLR.I                     | 2 | 3.24 | 0.17 | -6.02 |
| IPI00004084 | Isoform 2 of Cyclic AMP-dependent transcription factor ATF-6 beta | R.DSVGQLQLYR.H                            | 2 | 2.70 | 0.25 | -1.09 |
| IPI00004114 | Ribonuclease K6 precursor                                         | K.FFIVACDPPQKSDPPYK.L                     | 3 | 2.35 | 0.15 | -0.18 |
| IPI00004114 | Ribonuclease K6 precursor                                         | K.LVPVHLSIL.-                             | 1 | 2.31 | 0.17 | -2.25 |
| IPI00004114 | Ribonuclease K6 precursor                                         | K.LVPVHLSIL.-                             | 2 | 3.12 | 0.31 | -2.10 |
| IPI00004114 | Ribonuclease K6 precursor                                         | R.YSAAAQYK.F                              | 1 | 2.11 | 0.27 | -2.20 |
| IPI00004315 | Sialic acid-binding Ig-like lectin 9 precursor                    | R.EGANTDQDAPVATNPPAR.A                    | 2 | 4.99 | 0.53 | -3.16 |
| IPI00004315 | Sialic acid-binding Ig-like lectin 9 precursor                    | R.EGANTDQDAPVATNPPAR.A                    | 3 | 3.56 | 0.36 | -2.17 |
| IPI00004346 | C-C chemokine receptor type 10                                    | R.ERSCPASK.R                              | 1 | 2.04 | 0.08 |       |
| IPI00004367 | FXFD domain-containing ion transport regulator 6 precursor        | K.EM*DPFHYYDQTLR.I                        | 2 | 2.74 | 0.36 | -3.34 |
| IPI00004373 | Mannose-binding protein C precursor                               | K.ALQTEM*AR.I                             | 2 | 2.00 | 0.12 | -1.73 |
| IPI00004409 | Discoidin domain-containing receptor 2 precursor                  | K.QVLDGNSNPYDIFLKDLEPPIVAR.F              | 3 | 4.38 | 0.36 | -4.84 |
| IPI00004413 | Tumor necrosis factor receptor superfamily member 21 precursor    | K.ASNLIGTYR.H                             | 1 | 2.12 | 0.19 | -2.17 |
| IPI00004413 | Tumor necrosis factor receptor superfamily member 21 precursor    | K.ASNLIGTYR.H                             | 2 | 2.75 | 0.21 | -0.83 |
| IPI00004413 | Tumor necrosis factor receptor superfamily member 21 precursor    | K.AYTDCLSQNLVVIKPGTK.E                    | 2 | 3.84 | 0.43 | -3.89 |
| IPI00004413 | Tumor necrosis factor receptor superfamily member 21 precursor    | K.AYTDCLSQNLVVIKPGTK.E                    | 3 | 2.20 | 0.13 | -1.18 |
| IPI00004413 | Tumor necrosis factor receptor superfamily member 21 precursor    | K.LPCAALTDR.E                             | 2 | 2.16 | 0.11 | -0.33 |
| IPI00004413 | Tumor necrosis factor receptor superfamily member 21 precursor    | R.ATGQVLTCDK.C                            | 2 | 3.00 | 0.22 | -0.49 |
| IPI00004413 | Tumor necrosis factor receptor superfamily member 21 precursor    | R.GTFSDVPSSVM*K.C                         | 1 | 1.83 | 0.25 | -2.90 |
| IPI00004413 | Tumor necrosis factor receptor superfamily member 21 precursor    | R.GTFSDVPSSVM*K.C                         | 2 | 3.05 | 0.16 | -3.30 |
| IPI00004413 | Tumor necrosis factor receptor superfamily member 21 precursor    | R.VCSSCPVGTFR.H                           | 2 | 3.66 | 0.43 | -2.69 |
| IPI00004433 | Contactin-6 precursor                                             | G.DGLLSRPIFTQEPHDVIFPLDLSK.S              | 3 | 4.14 | 0.37 | -3.49 |
| IPI00004433 | Contactin-6 precursor                                             | K.ANTIYFASVR.A                            | 1 | 1.78 | 0.08 | -3.24 |



|             |                                                             |                                          |   |      |      |       |
|-------------|-------------------------------------------------------------|------------------------------------------|---|------|------|-------|
| IPI00004433 | Contactin-6 precursor                                       | K.ANTIYFASVR.A                           | 2 | 2.62 | 0.24 | -2.97 |
| IPI00004433 | Contactin-6 precursor                                       | K.ASVPVVAPVNIHGGGSR.S                    | 2 | 2.70 | 0.40 | -3.34 |
| IPI00004433 | Contactin-6 precursor                                       | K.ASVPVVAPVNIHGGGSR.S                    | 3 | 1.80 | 0.10 | -2.55 |
| IPI00004433 | Contactin-6 precursor                                       | K.GQLIFYAPPEWEQK.I                       | 2 | 4.71 | 0.48 | -4.18 |
| IPI00004433 | Contactin-6 precursor                                       | K.LQFAYIEDFETK.T                         | 2 | 4.28 | 0.43 | -3.29 |
| IPI00004433 | Contactin-6 precursor                                       | K.SQAILEIPNFQDEDEGFYECIASNLR.G           | 3 | 5.05 | 0.50 | -5.69 |
| IPI00004433 | Contactin-6 precursor                                       | K.YQIIYANAELR.V                          | 2 | 2.92 | 0.28 | -2.68 |
| IPI00004433 | Contactin-6 precursor                                       | R.AGPDNNSPIQIFTIQR.T                     | 2 | 4.37 | 0.44 | -4.60 |
| IPI00004433 | Contactin-6 precursor                                       | R.EGQGVVLLCGPPHFGDLSYAWTFNDNPLYVQEDNRR.F | 4 | 3.80 | 0.41 | -3.55 |
| IPI00004433 | Contactin-6 precursor                                       | R.FPETIQAQK.D                            | 2 | 2.80 | 0.22 | -2.20 |
| IPI00004433 | Contactin-6 precursor                                       | R.FVSQETGNLYIAK.V                        | 2 | 4.06 | 0.39 | -3.56 |
| IPI00004433 | Contactin-6 precursor                                       | R.IFLLEDGSLK.I                           | 2 | 3.19 | 0.17 | -2.93 |
| IPI00004433 | Contactin-6 precursor                                       | R.IGGESVGDLM*IR.N                        | 2 | 4.01 | 0.42 | -2.97 |
| IPI00004433 | Contactin-6 precursor                                       | R.LDGGSLAINSPHTDQDIGM*YQCLATNLLGTILSR.K  | 3 | 7.23 | 0.62 | -4.12 |
| IPI00004433 | Contactin-6 precursor                                       | R.LDGGSLAINSPHTDQDIGM*YQCLATNLLGTILSR.K  | 4 | 3.25 | 0.09 | -3.97 |
| IPI00004433 | Contactin-6 precursor                                       | R.LDGSPLPGK.V                            | 2 | 2.42 | 0.06 | -2.78 |
| IPI00004433 | Contactin-6 precursor                                       | R.PIFTQEPHDVIFPLDLSK.S                   | 3 | 4.11 | 0.40 | -2.32 |
| IPI00004433 | Contactin-6 precursor                                       | R.RLDGSPLPGK.V                           | 2 | 2.45 | 0.06 | -1.50 |
| IPI00004433 | Contactin-6 precursor                                       | R.SDAGSYTCIATNQFGTAK.N                   | 2 | 5.42 | 0.52 | -4.57 |
| IPI00004433 | Contactin-6 precursor                                       | R.SVQGPPTPLVQR.T                         | 2 | 3.38 | 0.33 | -2.65 |
| IPI00004433 | Contactin-6 precursor                                       | R.TDGM*GEYEPK.I                          | 2 | 3.27 | 0.22 | -3.13 |
| IPI00004433 | Contactin-6 precursor                                       | R.TKASVPVVAPVNIHGGGSR.S                  | 3 | 3.26 | 0.40 | -3.66 |
| IPI00004433 | Contactin-6 precursor                                       | R.TPFSVGWQAVATVPEILNGK.T                 | 2 | 5.97 | 0.51 | -4.42 |
| IPI00004433 | Contactin-6 precursor                                       | R.TPFSVGWQAVATVPEILNGK.T                 | 3 | 3.21 | 0.27 | -2.39 |
| IPI00004433 | Contactin-6 precursor                                       | R.TVSDGGDGSSEIR.I                        | 2 | 3.50 | 0.45 | -3.12 |
| IPI00004433 | Contactin-6 precursor                                       | R.TVSDGGDGSSEIRIPK.M                     | 2 | 3.66 | 0.47 | -0.48 |
| IPI00004433 | Contactin-6 precursor                                       | R.VLASAPDFSK.S                           | 1 | 1.38 | 0.05 | -3.77 |
| IPI00004433 | Contactin-6 precursor                                       | R.VLASAPDFSK.S                           | 2 | 2.28 | 0.13 | -1.99 |
| IPI00004433 | Contactin-6 precursor                                       | R.VVAGNSIGIGEPSESELLR.T                  | 2 | 4.53 | 0.45 | -2.97 |
| IPI00004433 | Contactin-6 precursor                                       | R.VVAGNSIGIGEPSESELLR.T                  | 3 | 3.88 | 0.24 | -2.93 |
| IPI00004440 | Receptor-type tyrosine-protein phosphatase-like N precursor | K.AEAPALFSR.T                            | 1 | 1.55 | 0.17 | -1.77 |
| IPI00004440 | Receptor-type tyrosine-protein phosphatase-like N precursor | K.EGLGRGEKPASPAVQPDAALQR.L               | 3 | 3.20 | 0.24 |       |
| IPI00004440 | Receptor-type tyrosine-protein phosphatase-like N precursor | K.KTM*EGPVEGR.D                          | 2 | 2.63 | 0.16 | 0.36  |
| IPI00004440 | Receptor-type tyrosine-protein phosphatase-like N precursor | K.SELEAQTGLQILQTGVGQR.E                  | 2 | 4.97 | 0.42 | -2.76 |
| IPI00004440 | Receptor-type tyrosine-protein phosphatase-like N precursor | K.SELEAQTGLQILQTGVGQR.E                  | 3 | 5.39 | 0.44 | -3.06 |
| IPI00004440 | Receptor-type tyrosine-protein phosphatase-like N precursor | K.TM*EGPVEGR.D                           | 2 | 3.08 | 0.35 | -1.09 |

|             |                                                             |                               |   |      |      |       |
|-------------|-------------------------------------------------------------|-------------------------------|---|------|------|-------|
| IPI00004440 | Receptor-type tyrosine-protein phosphatase-like N precursor | R.DTAELPAR.T                  | 2 | 2.23 | 0.22 | -2.42 |
| IPI00004440 | Receptor-type tyrosine-protein phosphatase-like N precursor | R.GEKPASPAVQPDAALQR.L         | 3 | 3.52 | 0.23 |       |
| IPI00004440 | Receptor-type tyrosine-protein phosphatase-like N precursor | R.IRHNEQNLADVTQQAGLVK.S       | 3 | 3.06 | 0.19 | -3.00 |
| IPI00004440 | Receptor-type tyrosine-protein phosphatase-like N precursor | R.LAAVLAGYGVELR.Q             | 2 | 4.19 | 0.38 |       |
| IPI00004440 | Receptor-type tyrosine-protein phosphatase-like N precursor | R.LPEQGSSSR.A                 | 2 | 2.51 | 0.16 | -3.26 |
| IPI00004440 | Receptor-type tyrosine-protein phosphatase-like N precursor | R.LPQPPVGK.G                  | 2 | 2.14 | 0.19 | -2.71 |
| IPI00004440 | Receptor-type tyrosine-protein phosphatase-like N precursor | R.NPGGVVNVGADIKK.T            | 2 | 3.27 | 0.35 | -2.00 |
| IPI00004440 | Receptor-type tyrosine-protein phosphatase-like N precursor | R.NPGGVVNVGADIKK.T            | 3 | 1.87 | 0.17 | -1.95 |
| IPI00004440 | Receptor-type tyrosine-protein phosphatase-like N precursor | R.QLTPEQLSTLLTLLQLLPK.G       | 2 | 4.73 | 0.43 | -2.35 |
| IPI00004440 | Receptor-type tyrosine-protein phosphatase-like N precursor | R.VSEGSPPM*VSVGPLPK.A         | 2 | 3.82 | 0.48 | -4.23 |
| IPI00004457 | Membrane copper amine oxidase                               | R.EALAIFFGR.Q                 | 2 | 3.33 | 0.29 | -2.93 |
| IPI00004457 | Membrane copper amine oxidase                               | R.NLVTM*TTAPR.G               | 2 | 2.12 | 0.15 | -1.13 |
| IPI00004480 | ADAM DEC1 precursor                                         | K.TKHLGPDYTETLYSPR.G          | 3 | 4.10 | 0.46 | -3.26 |
| IPI00004488 | Vacuolar proton pump subunit F                              | K.LIAVIGDEDVTGFLGGIGELNK.N    | 2 | 5.14 | 0.44 | -3.18 |
| IPI00004488 | Vacuolar proton pump subunit F                              | K.LIAVIGDEDVTGFLGGIGELNK.N    | 3 | 3.17 | 0.23 | -2.75 |
| IPI00004488 | Vacuolar proton pump subunit F                              | R.DDIGIILINQYIAEMVR.H         | 2 | 3.78 | 0.40 | -1.10 |
| IPI00004494 | Semaphorin-3E precursor                                     | R.VGYHLEDPLFHLESPPR.S         | 4 | 3.24 | 0.23 | -2.99 |
| IPI00004494 | Semaphorin-3E precursor                                     | R.YYPTGTHAK.R                 | 2 | 1.67 | 0.05 | -2.37 |
| IPI00004503 | lysosomal-associated membrane protein 1                     | K.AFSVNIFK.V                  | 2 | 2.81 | 0.22 | -1.31 |
| IPI00004503 | lysosomal-associated membrane protein 1                     | K.TVESITDIR.A                 | 1 | 2.24 | 0.21 | -3.84 |
| IPI00004503 | lysosomal-associated membrane protein 1                     | K.TVESITDIR.A                 | 2 | 3.62 | 0.23 | -2.89 |
| IPI00004503 | lysosomal-associated membrane protein 1                     | K.TVESITDIRADIDKK.Y           | 2 | 2.91 | 0.17 | -3.44 |
| IPI00004503 | lysosomal-associated membrane protein 1                     | K.TVESITDIRADIDKK.Y           | 4 | 2.38 | 0.15 | -1.62 |
| IPI00004503 | lysosomal-associated membrane protein 1                     | R.ALQATVGNSYK.C               | 1 | 2.58 | 0.38 | -1.70 |
| IPI00004503 | lysosomal-associated membrane protein 1                     | R.ALQATVGNSYK.C               | 2 | 4.13 | 0.35 | -1.53 |
| IPI00004503 | lysosomal-associated membrane protein 1                     | R.FFLQGIQLNTILPDAR.D          | 2 | 4.65 | 0.45 | -3.09 |
| IPI00004503 | lysosomal-associated membrane protein 1                     | R.FFLQGIQLNTILPDAR.D          | 3 | 3.13 | 0.19 | -2.38 |
| IPI00004503 | lysosomal-associated membrane protein 1                     | R.FFLQGIQLNTILPDARDPAFK.A     | 2 | 4.37 | 0.38 | -3.38 |
| IPI00004503 | lysosomal-associated membrane protein 1                     | R.FFLQGIQLNTILPDARDPAFK.A     | 3 | 4.21 | 0.36 | -5.07 |
| IPI00004503 | lysosomal-associated membrane protein 1                     | R.FFLQGIQLNTILPDARDPAFK.A     | 4 | 2.59 | 0.15 | -1.90 |
| IPI00004533 | Kinesin-like protein KIF3B                                  | R.EKDAEM*LGAK.I               | 2 | 1.23 | 0.06 | -1.94 |
| IPI00004534 | Phosphoribosylformylglycinamide synthase                    | -.MSPVLHFYVRPSGHEGAASGHTRRK.L | 3 | 2.35 | 0.24 | -2.51 |

|             |                                                 |                                |   |      |      |       |
|-------------|-------------------------------------------------|--------------------------------|---|------|------|-------|
| IPI00004573 | Polymeric immunoglobulin receptor precursor     | R.ASVDSGSSEEQGGSSR.A           | 2 | 3.79 | 0.44 | -2.65 |
| IPI00004573 | Polymeric immunoglobulin receptor precursor     | R.ASVDSGSSEEQGGSSRA.L          | 2 | 3.29 | 0.44 | -1.25 |
| IPI00004656 | Beta-2-microglobulin                            | C.YVSGFHPSDIEVDLLK.N           | 2 | 4.52 | 0.40 | -3.96 |
| IPI00004656 | Beta-2-microglobulin                            | E.KVEHSDLSFSK.D                | 2 | 3.79 | 0.24 | -2.38 |
| IPI00004656 | Beta-2-microglobulin                            | F.LNCYVSGFHPSDIEVDLLK.N        | 2 | 5.52 | 0.54 | -4.19 |
| IPI00004656 | Beta-2-microglobulin                            | G.FHPSDIEVDLLK.N               | 3 | 3.89 | 0.18 | -1.93 |
| IPI00004656 | Beta-2-microglobulin                            | H.PSDIEVDLLK.N                 | 2 | 3.20 | 0.26 | -0.82 |
| IPI00004656 | Beta-2-microglobulin                            | I.EKVEHSDLSFSK.D               | 2 | 3.76 | 0.38 | -3.57 |
| IPI00004656 | Beta-2-microglobulin                            | K.DWSFYLLYYTEFTPTEKDEYACR.V    | 3 | 5.95 | 0.60 | -6.73 |
| IPI00004656 | Beta-2-microglobulin                            | K.IQVYSRHPAENGK.S              | 2 | 3.34 | 0.38 | -5.05 |
| IPI00004656 | Beta-2-microglobulin                            | K.IQVYSRHPAENGK.S              | 3 | 2.14 | 0.10 | -1.96 |
| IPI00004656 | Beta-2-microglobulin                            | K.NGERIEKVEHSDLSFSK.D          | 2 | 4.50 | 0.55 | -3.47 |
| IPI00004656 | Beta-2-microglobulin                            | K.NGERIEKVEHSDLSFSK.D          | 3 | 3.76 | 0.34 | -3.65 |
| IPI00004656 | Beta-2-microglobulin                            | K.NGERIEKVEHSDLSFSK.D          | 4 | 3.36 | 0.15 | -2.28 |
| IPI00004656 | Beta-2-microglobulin                            | K.SNFLNCYVSGFHPSDIEVDLLK.N     | 2 | 5.60 | 0.59 | -4.77 |
| IPI00004656 | Beta-2-microglobulin                            | K.SNFLNCYVSGFHPSDIEVDLLK.N     | 3 | 4.60 | 0.48 | -7.63 |
| IPI00004656 | Beta-2-microglobulin                            | K.SNFLNCYVSGFHPSDIEVDLLK.N     | 4 | 3.98 | 0.36 | -1.94 |
| IPI00004656 | Beta-2-microglobulin                            | K.SNFLNCYVSGFHPSDIEVDLLKNGER.I | 3 | 5.44 | 0.49 | -2.33 |
| IPI00004656 | Beta-2-microglobulin                            | K.SNFLNCYVSGFHPSDIEVDLLKNGER.I | 4 | 3.44 | 0.15 | -4.07 |
| IPI00004656 | Beta-2-microglobulin                            | K.VEHSDLSFSK.D                 | 1 | 3.58 | 0.29 | -4.20 |
| IPI00004656 | Beta-2-microglobulin                            | K.VEHSDLSFSK.D                 | 2 | 3.42 | 0.33 | -3.59 |
| IPI00004656 | Beta-2-microglobulin                            | L.NCYVSGFHPSDIEVDLLK.N         | 2 | 5.70 | 0.52 | -1.72 |
| IPI00004656 | Beta-2-microglobulin                            | N.CYVSGFHPSDIEVDLLK.N          | 2 | 5.68 | 0.53 | -5.77 |
| IPI00004656 | Beta-2-microglobulin                            | N.FLNCYVSGFHPSDIEVDLLK.N       | 2 | 5.62 | 0.56 | -3.93 |
| IPI00004656 | Beta-2-microglobulin                            | N.FLNCYVSGFHPSDIEVDLLK.N       | 3 | 4.47 | 0.46 | -3.01 |
| IPI00004656 | Beta-2-microglobulin                            | R.IEKVEHSDLSFSK.D              | 1 | 4.06 | 0.38 | -4.10 |
| IPI00004656 | Beta-2-microglobulin                            | R.IEKVEHSDLSFSK.D              | 2 | 4.85 | 0.41 | -8.48 |
| IPI00004656 | Beta-2-microglobulin                            | R.IEKVEHSDLSFSK.D              | 3 | 3.67 | 0.28 | -3.39 |
| IPI00004656 | Beta-2-microglobulin                            | R.TPKIQVYSR.H                  | 2 | 2.04 | 0.12 | -2.36 |
| IPI00004656 | Beta-2-microglobulin                            | V.SGFHPSDIEVDLLK.N             | 2 | 3.84 | 0.45 | -3.12 |
| IPI00004656 | Beta-2-microglobulin                            | Y.VSGFHPSDIEVDLLK.N            | 2 | 3.64 | 0.34 | -3.18 |
| IPI00004656 | Beta-2-microglobulin                            | Y.VSGFHPSDIEVDLLK.N            | 3 | 4.74 | 0.38 | -2.48 |
| IPI00004669 | Polypeptide N-acetylgalactosaminyltransferase 2 | K.AQSM*ETLPPGK.V               | 2 | 2.06 | 0.10 | -2.58 |
| IPI00004669 | Polypeptide N-acetylgalactosaminyltransferase 2 | K.EIILVDDYSNDPEDGALLGK.I       | 2 | 6.36 | 0.61 | -4.05 |
| IPI00004669 | Polypeptide N-acetylgalactosaminyltransferase 2 | K.EIILVDDYSNDPEDGALLGK.I       | 3 | 4.08 | 0.42 | -1.39 |
| IPI00004669 | Polypeptide N-acetylgalactosaminyltransferase 2 | K.EIILVDDYSNDPEDGALLGKIEK.V    | 3 | 2.84 | 0.24 | -3.69 |
| IPI00004669 | Polypeptide N-acetylgalactosaminyltransferase 2 | K.FTLNLQQ.-                    | 2 | 2.04 | 0.06 | -2.82 |
| IPI00004669 | Polypeptide N-acetylgalactosaminyltransferase 2 | K.GGFDWNLVFK.W                 | 2 | 3.58 | 0.30 | -2.30 |
| IPI00004669 | Polypeptide N-acetylgalactosaminyltransferase 2 | K.HM*DLCLTVVDRAPGSLIK.L        | 3 | 2.48 | 0.25 | -3.72 |
| IPI00004669 | Polypeptide N-acetylgalactosaminyltransferase 2 | K.NFYAAVPSAR.N                 | 2 | 3.23 | 0.21 | -2.19 |
| IPI00004669 | Polypeptide N-acetylgalactosaminyltransferase 2 | K.QHPYTFPGGSGTVFAR.N           | 3 | 2.71 | 0.28 | -0.80 |
| IPI00004669 | Polypeptide N-acetylgalactosaminyltransferase 2 | K.WYLENVYPELR.V                | 2 | 4.37 | 0.43 | -4.50 |

|             |                                                 |                               |   |      |      |       |
|-------------|-------------------------------------------------|-------------------------------|---|------|------|-------|
| IPI00004669 | Polypeptide N-acetylgalactosaminyltransferase 2 | M.YSGGGSALAGGAGGGAGR.K        | 2 | 5.16 | 0.51 | -1.21 |
| IPI00004669 | Polypeptide N-acetylgalactosaminyltransferase 2 | R.AAEVWM*DEYKNFYAAVPSAR.N     | 3 | 2.48 | 0.15 | -3.47 |
| IPI00004669 | Polypeptide N-acetylgalactosaminyltransferase 2 | R.NKFNQVESDKLR.M              | 3 | 3.62 | 0.15 | -2.34 |
| IPI00004669 | Polypeptide N-acetylgalactosaminyltransferase 2 | R.QGNPVAPIK.T                 | 2 | 2.02 | 0.09 | 0.33  |
| IPI00004669 | Polypeptide N-acetylgalactosaminyltransferase 2 | R.SGQDPYAR.N                  | 2 | 2.50 | 0.18 | -0.71 |
| IPI00004669 | Polypeptide N-acetylgalactosaminyltransferase 2 | R.TVVSVLKK.S                  | 2 | 2.26 | 0.06 | -1.73 |
| IPI00004669 | Polypeptide N-acetylgalactosaminyltransferase 2 | R.VDLPATSVVITFHNEAR.S         | 3 | 2.75 | 0.35 | -2.45 |
| IPI00004669 | Polypeptide N-acetylgalactosaminyltransferase 2 | R.VVSPIIDVINM*DNFQYVGASADLK.G | 2 | 3.88 | 0.43 | -4.57 |
| IPI00004669 | Polypeptide N-acetylgalactosaminyltransferase 2 | R.VVSPIIDVINM*DNFQYVGASADLK.G | 3 | 5.78 | 0.51 | -4.22 |
| IPI00004669 | Polypeptide N-acetylgalactosaminyltransferase 2 | R.WPDFNQEAYVGGTM*VR.S         | 2 | 4.98 | 0.53 | -3.70 |
| IPI00004669 | Polypeptide N-acetylgalactosaminyltransferase 2 | Y.SGGGGSALAGGAGGGAGR.K        | 2 | 3.95 | 0.29 | -2.46 |
| IPI00004798 | cDNA FLJ75207                                   | K.YYYVCQYCPAGNWANR.L          | 2 | 4.29 | 0.48 | 1.57  |
| IPI00004946 | chemokine (C-X-C motif) ligand 16               | G.HSLAAGPEAGENQK.Q            | 2 | 3.43 | 0.47 | -2.91 |
| IPI00004946 | chemokine (C-X-C motif) ligand 16               | G.NEGSVTGSCYCGK.R             | 2 | 3.91 | 0.52 | -1.80 |
| IPI00004946 | chemokine (C-X-C motif) ligand 16               | H.SLAAGPEAGENQK.Q             | 2 | 3.97 | 0.34 | -2.09 |
| IPI00004946 | chemokine (C-X-C motif) ligand 16               | H.SLAAGPEAGENQKQPEK.N         | 2 | 3.77 | 0.38 | -2.09 |
| IPI00004946 | chemokine (C-X-C motif) ligand 16               | K.RISSDSPPSVQFM*NR.L          | 3 | 3.35 | 0.19 | -3.22 |
| IPI00004946 | chemokine (C-X-C motif) ligand 16               | R.ISSDSPPSVQFM*NR.L           | 2 | 3.60 | 0.37 | -3.99 |
| IPI00004946 | chemokine (C-X-C motif) ligand 16               | S.LAAGPEAGENQK.Q              | 2 | 3.46 | 0.30 | -2.04 |
| IPI00004962 | Golgi integral membrane protein 4               | K.FQSPYEEQLEQQR.L             | 2 | 3.69 | 0.34 | -2.46 |
| IPI00004962 | Golgi integral membrane protein 4               | K.FQSPYEEQLEQQR.L             | 3 | 2.94 | 0.27 | -3.00 |
| IPI00004962 | Golgi integral membrane protein 4               | R.DNQHQDEAEGDPGNRHEPR.E       | 3 | 2.60 | 0.36 | -2.73 |
| IPI00004962 | Golgi integral membrane protein 4               | R.DNQHQDEAEGDPGNRHEPR.E       | 4 | 2.60 | 0.39 | -3.04 |
| IPI00004962 | Golgi integral membrane protein 4               | R.EAANLLEGHAR.A               | 2 | 3.12 | 0.30 | -2.34 |
| IPI00004962 | Golgi integral membrane protein 4               | R.EADPESEADRAAVEDINPA.D       | 2 | 4.07 | 0.40 | -2.91 |
| IPI00004962 | Golgi integral membrane protein 4               | R.LAVQQVEEAQQLR.E             | 2 | 4.44 | 0.31 | -3.24 |
| IPI00004962 | Golgi integral membrane protein 4               | R.LAVQQVEEAQQLREHQEALHQQR.L   | 3 | 5.16 | 0.53 | -3.51 |
| IPI00004962 | Golgi integral membrane protein 4               | R.QAELEEGRPQHQEQLR.Q          | 3 | 2.03 | 0.17 | -3.57 |
| IPI00004962 | Golgi integral membrane protein 4               | R.QQEQQQQQVAR.E               | 2 | 2.69 | 0.27 | -3.96 |
| IPI00005038 | Ribonuclease UK114                              | K.APGAIGPYSQAVLVDR.T          | 2 | 3.51 | 0.46 | -3.70 |
| IPI00005038 | Ribonuclease UK114                              | K.TTVLLADINDFNTVNEIYK.Q       | 2 | 5.85 | 0.60 | -3.92 |
| IPI00005038 | Ribonuclease UK114                              | K.TTVLLADINDFNTVNEIYK.Q       | 3 | 5.81 | 0.53 | -3.71 |
| IPI00005107 | Niemann-Pick C1 protein precursor               | R.QLQTLKDNLQLPLQFLSR.C        | 3 | 4.16 | 0.30 | -2.73 |
| IPI00005123 | Ephrin-A3 precursor                             | E.DFEGENPQVPK.L               | 2 | 2.96 | 0.27 | -2.66 |
| IPI00005123 | Ephrin-A3 precursor                             | K.INVLEDFEGENPQVPK.L          | 2 | 4.47 | 0.42 | -3.19 |
| IPI00005123 | Ephrin-A3 precursor                             | K.INVLEDFEGENPQVPK.L          | 3 | 4.30 | 0.34 | -3.33 |
| IPI00005123 | Ephrin-A3 precursor                             | K.INVLEDFEGENPQVPKLEK.S       | 2 | 5.10 | 0.46 | -3.59 |
| IPI00005123 | Ephrin-A3 precursor                             | K.INVLEDFEGENPQVPKLEK.S       | 3 | 4.78 | 0.47 | -2.64 |
| IPI00005126 | Ephrin-B2 precursor                             | K.FLPGQGLVLYPQIGDKLDIICPK.V   | 2 | 4.04 | 0.44 | -2.20 |
| IPI00005126 | Ephrin-B2 precursor                             | K.FLPGQGLVLYPQIGDKLDIICPK.V   | 3 | 2.13 | 0.22 | -3.62 |
| IPI00005126 | Ephrin-B2 precursor                             | K.FQEFSPNLWGLEFQK.N           | 2 | 5.15 | 0.41 | -3.46 |
| IPI00005126 | Ephrin-B2 precursor                             | K.FQEFSPNLWGLEFQK.N           | 3 | 5.53 | 0.28 | -3.83 |

|             |                                                                  |                                         |   |      |      |       |
|-------------|------------------------------------------------------------------|-----------------------------------------|---|------|------|-------|
| IPI00005126 | Ephrin-B2 precursor                                              | K.TVGQYEYYK.V                           | 1 | 1.98 | 0.17 | -2.59 |
| IPI00005126 | Ephrin-B2 precursor                                              | K.TVGQYEYYK.V                           | 2 | 3.40 | 0.40 | -1.34 |
| IPI00005126 | Ephrin-B2 precursor                                              | K.VGQDASSAGSTR.N                        | 2 | 3.59 | 0.35 | -2.84 |
| IPI00005126 | Ephrin-B2 precursor                                              | K.VYM*VDKQADR.C                         | 2 | 3.35 | 0.39 | -2.58 |
| IPI00005126 | Ephrin-B2 precursor                                              | K.VYM*VDKQADR.C                         | 3 | 2.47 | 0.24 | -2.44 |
| IPI00005128 | Isoform 1 of Angiopoietin-2 precursor                            | R.DAPLEYDDSVQR.L                        | 2 | 2.86 | 0.34 | -3.61 |
| IPI00005129 | Isoform 1 of Secretory carrier-associated membrane protein 1     | R.NVPPGLDEYNPFSDSR.T                    | 2 | 2.06 | 0.25 | -2.35 |
| IPI00005132 | Guanine nucleotide-binding protein-like 3-like protein           | K.WLDYLRNELPTVAFK.A                     | 3 | 2.98 | 0.14 |       |
| IPI00005142 | Isoform 1 of Basic fibroblast growth factor receptor 1 precursor | A.RPSPTLPEQAQPWGAPVEVESFLVHPGDLLQLR.C   | 3 | 6.10 | 0.58 | -3.42 |
| IPI00005142 | Isoform 1 of Basic fibroblast growth factor receptor 1 precursor | K.CPSSGTPNPTLR.W                        | 2 | 2.55 | 0.06 | -0.79 |
| IPI00005142 | Isoform 1 of Basic fibroblast growth factor receptor 1 precursor | K.IGPDNLPLYVQILK.T                      | 2 | 3.42 | 0.31 | -4.27 |
| IPI00005142 | Isoform 1 of Basic fibroblast growth factor receptor 1 precursor | K.LHAVPAK.T                             | 1 | 1.88 | 0.14 | -3.27 |
| IPI00005142 | Isoform 1 of Basic fibroblast growth factor receptor 1 precursor | P.SPTLPEQAQPWGAPVEVESFLVHPGDLLQLR.C     | 3 | 3.81 | 0.45 | -3.92 |
| IPI00005142 | Isoform 1 of Basic fibroblast growth factor receptor 1 precursor | P.WGAPVEVESFLVHPGDLLQLR.C               | 3 | 3.75 | 0.35 | -2.88 |
| IPI00005142 | Isoform 1 of Basic fibroblast growth factor receptor 1 precursor | R.LRDDVQSINWLR.D                        | 2 | 3.69 | 0.27 | -2.79 |
| IPI00005142 | Isoform 1 of Basic fibroblast growth factor receptor 1 precursor | R.M*PVAPYWTSPEK.M                       | 2 | 3.40 | 0.38 | -1.81 |
| IPI00005142 | Isoform 1 of Basic fibroblast growth factor receptor 1 precursor | W.GAPVEVESFLVHPGDLLQLR.C                | 2 | 3.75 | 0.54 | -3.97 |
| IPI00005142 | Isoform 1 of Basic fibroblast growth factor receptor 1 precursor | W.GAPVEVESFLVHPGDLLQLR.C                | 3 | 3.92 | 0.49 | -3.47 |
| IPI00005153 | Isoform Aa of Odorant-binding protein 2a precursor               | K.LVGRNPNTNLEALEEFKK.L                  | 3 | 4.96 | 0.36 | -1.12 |
| IPI00005158 | Lon protease homolog, mitochondrial precursor                    | R.DRMEMINVSGYVAQEKLAIER.Y               | 2 | 1.62 | 0.06 | -2.05 |
| IPI00005159 | Actin-related protein 2                                          | R.FEAPALFQPHLINVEGVGVAELLFNTIQAADIDTR.S | 3 | 4.61 | 0.43 | -3.22 |
| IPI00005159 | Actin-related protein 2                                          | R.FEAPALFQPHLINVEGVGVAELLFNTIQAADIDTR.S | 4 | 3.69 | 0.20 | -3.18 |
| IPI00005222 | Ephrin type-B receptor 6 precursor                               | R.AGLQLNVK.E                            | 2 | 2.92 | 0.10 | -1.87 |
| IPI00005222 | Ephrin type-B receptor 6 precursor                               | R.ETFTLYR.Q                             | 2 | 1.91 | 0.23 | -1.39 |
| IPI00005222 | Ephrin type-B receptor 6 precursor                               | R.LFSYTCPAVLR.S                         | 2 | 2.91 | 0.28 | -2.87 |
| IPI00005292 | Testican-1 precursor                                             | K.DSLGWM*FNK.L                          | 2 | 2.19 | 0.15 | -2.02 |
| IPI00005292 | Testican-1 precursor                                             | K.SLLGAFIPR.C                           | 2 | 2.89 | 0.08 | -0.57 |
| IPI00005292 | Testican-1 precursor                                             | K.VCVTQDYQTALCVSR.K                     | 2 | 5.17 | 0.47 | -5.46 |
| IPI00005292 | Testican-1 precursor                                             | K.YGNELAGSRK.Q                          | 2 | 1.91 | 0.23 | 1.44  |

|             |                                                                              |                                              |   |      |      |       |
|-------------|------------------------------------------------------------------------------|----------------------------------------------|---|------|------|-------|
| IPI00005292 | Testican-1 precursor                                                         | R.AVTEDEDEDEDDKKEDEVG.Y.I                    | 2 | 5.17 | 0.66 | -3.84 |
| IPI00005292 | Testican-1 precursor                                                         | R.AVTEDEDEDEDDKKEDEVG.YI.W                   | 2 | 4.85 | 0.64 | -1.95 |
| IPI00005292 | Testican-1 precursor                                                         | R.CNEEGYYK.A                                 | 2 | 2.13 | 0.13 | -2.28 |
| IPI00005292 | Testican-1 precursor                                                         | R.FDTSILPICK.D                               | 2 | 3.18 | 0.27 | -3.82 |
| IPI00005292 | Testican-1 precursor                                                         | R.NWNPNKPFQALDPSKDPCLK.V                     | 3 | 3.28 | 0.15 | -2.58 |
| IPI00005347 | Zinc finger Ran-binding domain-containing protein 1                          | K.QIKNRMKKTDWLFLNACVGVVEGDLAAIEAYKSSGGDIAR.Q | 3 | 2.64 | 0.18 |       |
| IPI00005474 | Phospholysine phosphohistidine inorganic pyrophosphate phosphatase           | K.ADGYVDNLAEAVDLLLQH.A                       | 2 | 4.30 | 0.40 | -3.27 |
| IPI00005474 | Phospholysine phosphohistidine inorganic pyrophosphate phosphatase           | K.ADGYVDNLAEAVDLLLQHA.D                      | 2 | 4.54 | 0.48 | -3.46 |
| IPI00005474 | Phospholysine phosphohistidine inorganic pyrophosphate phosphatase           | K.ADGYVDNLAEAVDLLLQHAD.K                     | 2 | 5.48 | 0.48 | -3.22 |
| IPI00005474 | Phospholysine phosphohistidine inorganic pyrophosphate phosphatase           | K.SALQAIGVEAHQAVM*IGDDIVGDVGGAGR.C           | 3 | 4.05 | 0.34 | -4.96 |
| IPI00005474 | Phospholysine phosphohistidine inorganic pyrophosphate phosphatase           | K.SALQAIGVEAHQAVM*IGDDIVGDVGGAGR.C           | 4 | 2.96 | 0.15 | -2.75 |
| IPI00005474 | Phospholysine phosphohistidine inorganic pyrophosphate phosphatase           | K.SRAELVGQLQR.L                              | 2 | 3.28 | 0.19 | -1.90 |
| IPI00005516 | Leucine-rich repeat-containing protein 4 precursor                           | R.GLSEVPQGIPSNTR.Y                           | 2 | 2.87 | 0.26 | -3.56 |
| IPI00005516 | Leucine-rich repeat-containing protein 4 precursor                           | R.NNPIESIPSYAFNR.V                           | 2 | 4.73 | 0.49 | -3.34 |
| IPI00005516 | Leucine-rich repeat-containing protein 4 precursor                           | R.NNPIESIPSYAFNR.V                           | 3 | 2.28 | 0.13 | -1.75 |
| IPI00005516 | Leucine-rich repeat-containing protein 4 precursor                           | R.RGLSEVPQGIPSNTR.Y                          | 2 | 4.06 | 0.42 | -3.73 |
| IPI00005517 | Ephrin-A5 precursor                                                          | K.TIGVHDR.V                                  | 1 | 1.53 | 0.09 | -1.61 |
| IPI00005517 | Ephrin-A5 precursor                                                          | R.VFDVNDKVENSLIPA.D                          | 2 | 3.17 | 0.32 | -1.17 |
| IPI00005517 | Ephrin-A5 precursor                                                          | R.YVLYM*VNFQDGYSDHTSK.G                      | 3 | 2.73 | 0.22 | -3.68 |
| IPI00005531 | Isoform 1 of Probable DNA dC->dU-editing enzyme APOBEC-3B                    | R.DTFYDNFENEPILYGRSYTWLCYEVKIKR.G            | 3 | 3.04 | 0.12 |       |
| IPI00005564 | Stanniocalcin-1 precursor                                                    | K.RNPEAITEVVQLPNHFSNR.Y                      | 3 | 5.17 | 0.35 | -4.24 |
| IPI00005600 | Isoform 1 of Bifunctional heparan sulfate N-deacetylase/N-sulfotransferase 2 | R.LFLTDFFR.N                                 | 2 | 3.04 | 0.21 | -1.87 |
| IPI00005605 | Isoform 1 of Protein NDRG3                                                   | R.THSTSSSLGSGESPFGR.S                        | 2 | 4.48 | 0.54 | -1.42 |
| IPI00005605 | Isoform 1 of Protein NDRG3                                                   | R.THSTSSSLGSGESPFGR.S                        | 3 | 3.33 | 0.20 | -0.03 |
| IPI00005607 | Isoform 1 of Deleted in bladder cancer protein 1 precursor                   | K.LLQSATEAQR.Q                               | 2 | 3.23 | 0.19 | -1.25 |
| IPI00005614 | Isoform Long of Spectrin beta chain, brain 1                                 | R.AQQYYFDAAEAEAWMSEQELYMMSEEK.A              | 3 | 4.67 | 0.54 | -0.81 |
| IPI00005652 | Isoform 1 of WSC domain-containing protein 2                                 | G.FVGQPAVSGNQANPAAAGGPAEGAELSLGDM*HLGR.G     | 3 | 4.98 | 0.40 | -2.39 |
| IPI00005652 | Isoform 1 of WSC domain-containing protein 2                                 | K.TISAYIKM*VDAALKGRNLTGVPDDYYPR.-            | 3 | 3.72 | 0.07 | 1.94  |

|             |                                                                                     |                                                 |   |      |      |       |
|-------------|-------------------------------------------------------------------------------------|-------------------------------------------------|---|------|------|-------|
| IPI00005652 | Isoform 1 of WSC domain-containing protein 2                                        | L.VFLHSGFVGQPAVSGNQANPAAAGGPAEGAELSFLGDM*HLGR.G | 4 | 4.71 | 0.38 | -2.40 |
| IPI00005652 | Isoform 1 of WSC domain-containing protein 2                                        | R.DTGEASSIAR.R                                  | 2 | 3.37 | 0.31 | -2.30 |
| IPI00005668 | Aldo-keto reductase family 1 member C2                                              | R.TPALIALR.Y                                    | 2 | 2.87 | 0.23 | -2.11 |
| IPI00005675 | NF-kappa-B-repressing factor                                                        | R.KMGWTGGGLGKSGEGIR.E                           | 2 | 1.93 | 0.06 | -5.76 |
| IPI00005690 | Matrilin-3 precursor                                                                | K.VAIIVTDGRPQDQVNEVAAR.A                        | 3 | 3.66 | 0.42 | 1.51  |
| IPI00005690 | Matrilin-3 precursor                                                                | R.SVRPLEFTK.V                                   | 2 | 1.88 | 0.09 | -0.25 |
| IPI00005705 | Isoform Gamma-1 of Serine/threonine-protein phosphatase PP1-gamma catalytic subunit | K.IKYPENFFLLR.G                                 | 3 | 3.27 | 0.34 | -4.19 |
| IPI00005707 | Macrophage mannose receptor 2 precursor                                             | K.CFQVQGQEPQSR.V                                | 2 | 3.63 | 0.46 | -3.53 |
| IPI00005707 | Macrophage mannose receptor 2 precursor                                             | K.QIKQEVEELWIGLNDLK.L                           | 3 | 2.53 | 0.06 | -3.30 |
| IPI00005707 | Macrophage mannose receptor 2 precursor                                             | K.SWVQAQGACQELGAQLLSLASYEEHFVANM*LNK.I          | 3 | 4.34 | 0.40 | -3.36 |
| IPI00005707 | Macrophage mannose receptor 2 precursor                                             | R.CLTALPYICK.R                                  | 2 | 2.96 | 0.23 | -2.90 |
| IPI00005707 | Macrophage mannose receptor 2 precursor                                             | R.DCSIALPYVCK.K                                 | 2 | 2.46 | 0.24 | -2.09 |
| IPI00005707 | Macrophage mannose receptor 2 precursor                                             | R.GTDVREPDDSPQGR.R                              | 2 | 2.09 | 0.05 | -1.07 |
| IPI00005707 | Macrophage mannose receptor 2 precursor                                             | R.GTDVREPDDSPQGR.R                              | 3 | 3.54 | 0.31 | 0.21  |
| IPI00005707 | Macrophage mannose receptor 2 precursor                                             | R.TLGDQLSLLLGAR.T                               | 2 | 4.32 | 0.39 | -3.81 |
| IPI00005707 | Macrophage mannose receptor 2 precursor                                             | R.TPLWIGLAGEEGSRR.Y                             | 3 | 2.34 | 0.21 | -2.83 |
| IPI00005719 | Isoform 1 of Ras-related protein Rab-1A                                             | R.M*GPGATAGGAEK.S                               | 2 | 2.57 | 0.23 | -2.29 |
| IPI00005722 | Tyrosine-protein kinase receptor                                                    | K.M*FTLNIR.R                                    | 2 | 1.78 | 0.08 | -1.22 |
| IPI00005722 | Tyrosine-protein kinase receptor                                                    | K.VGEPLWIR.C                                    | 2 | 2.34 | 0.05 | -2.57 |
| IPI00005722 | Tyrosine-protein kinase receptor                                                    | R.LFTIDLNQTPQTTLPQLFLK.V                        | 3 | 5.18 | 0.33 | -4.57 |
| IPI00005732 | Isoform 1 of Activin receptor type-1B precursor                                     | K.VELVPAGKPFYCLSEDLR.N                          | 2 | 2.13 | 0.17 | -4.24 |
| IPI00005732 | Isoform 1 of Activin receptor type-1B precursor                                     | K.VELVPAGKPFYCLSEDLR.N                          | 3 | 2.67 | 0.37 | -2.27 |
| IPI00005774 | Isoform 1 of Low-density lipoprotein receptor-related protein 8 precursor           | K.SPSLIFTNR.H                                   | 2 | 2.75 | 0.18 | -0.77 |
| IPI00005774 | Isoform 1 of Low-density lipoprotein receptor-related protein 8 precursor           | K.TLISSTDFLSHPFGIAVFEDK.V                       | 2 | 5.61 | 0.51 | -4.08 |
| IPI00005774 | Isoform 1 of Low-density lipoprotein receptor-related protein 8 precursor           | K.TLISSTDFLSHPFGIAVFEDK.V                       | 3 | 2.40 | 0.17 | -5.10 |
| IPI00005776 | Nucleotide-binding oligomerization domain-containing protein 1                      | R.CIYETQSQKVGQLAAR.G                            | 2 | 2.90 | 0.13 | -4.34 |
| IPI00005794 | 60 kDa protein                                                                      | F.SIYSPHTGIQEYQDGVPK.I                          | 2 | 4.02 | 0.47 | -3.01 |
| IPI00005794 | 60 kDa protein                                                                      | F.SIYSPHTGIQEYQDGVPK.I                          | 3 | 4.01 | 0.32 | -2.97 |
| IPI00005794 | 60 kDa protein                                                                      | K.AIINLAVYGK.A                                  | 1 | 2.25 | 0.34 | -1.32 |
| IPI00005794 | 60 kDa protein                                                                      | K.AIINLAVYGK.A                                  | 2 | 3.51 | 0.20 | -1.44 |
| IPI00005794 | 60 kDa protein                                                                      | K.AIQIM*YQNLQQDGLEK.V                           | 2 | 5.98 | 0.49 | -4.67 |
| IPI00005794 | 60 kDa protein                                                                      | K.AIQIM*YQNLQQDGLEK.V                           | 3 | 4.69 | 0.37 | -5.00 |
| IPI00005794 | 60 kDa protein                                                                      | K.AIQIM*YQNLQQDGLEKVHLEPVR.I                    | 4 | 2.97 | 0.15 | -3.02 |
| IPI00005794 | 60 kDa protein                                                                      | K.AIQIMYQNLQQDGLEK.V                            | 2 | 4.48 | 0.20 |       |
| IPI00005794 | 60 kDa protein                                                                      | K.IPTACITVEDAEM*M*SR.M                          | 2 | 5.34 | 0.51 | -4.42 |
| IPI00005794 | 60 kDa protein                                                                      | K.IPTACITVEDAEM*M*SR.M                          | 3 | 4.32 | 0.38 | -2.88 |
| IPI00005794 | 60 kDa protein                                                                      | K.IVVYNQPYINYSR.T                               | 2 | 3.65 | 0.36 | -2.86 |

|             |                                                                      |                                             |   |      |      |       |
|-------------|----------------------------------------------------------------------|---------------------------------------------|---|------|------|-------|
| IPI00005794 | 60 kDa protein                                                       | K.TYPTDTSFNTVAEITGSK.Y                      | 2 | 4.80 | 0.55 | -3.41 |
| IPI00005794 | 60 kDa protein                                                       | K.VGALASLR.S                                | 2 | 3.62 | 0.16 | -2.72 |
| IPI00005794 | 60 kDa protein                                                       | K.VHLEPVR.I                                 | 1 | 2.07 | 0.16 | -4.33 |
| IPI00005794 | 60 kDa protein                                                       | K.VHLEPVR.I                                 | 2 | 1.97 | 0.13 | -4.71 |
| IPI00005794 | 60 kDa protein                                                       | R.GEESAVM*LEPR.I                            | 2 | 3.84 | 0.39 | -2.86 |
| IPI00005794 | 60 kDa protein                                                       | R.GKIVVYNQPYINYSR.T                         | 2 | 4.53 | 0.50 | -4.12 |
| IPI00005794 | 60 kDa protein                                                       | R.GKIVVYNQPYINYSR.T                         | 3 | 4.23 | 0.42 | -3.36 |
| IPI00005794 | 60 kDa protein                                                       | R.LALLVDTVGP.R.L                            | 1 | 2.38 | 0.42 | -2.76 |
| IPI00005794 | 60 kDa protein                                                       | R.LALLVDTVGP.R.L                            | 2 | 3.98 | 0.31 | -3.44 |
| IPI00005794 | 60 kDa protein                                                       | R.SVASFSIYSPHTGIQEYQDGVPK.I                 | 2 | 3.79 | 0.43 | -8.19 |
| IPI00005794 | 60 kDa protein                                                       | R.SVASFSIYSPHTGIQEYQDGVPK.I                 | 3 | 4.38 | 0.43 | -2.95 |
| IPI00005809 | Serum deprivation-response protein                                   | A.SALVEGEIAEEAAEK.A                         | 2 | 5.32 | 0.43 | -2.76 |
| IPI00005809 | Serum deprivation-response protein                                   | K.ERMDRQCAQVKRENNHAQLLR.R                   | 2 | 2.15 | 0.17 |       |
| IPI00005809 | Serum deprivation-response protein                                   | S.ALVEGEIAEEAAEK.A                          | 2 | 4.61 | 0.48 | -3.10 |
| IPI00005837 | Angiopoietin-related protein 1 precursor                             | R.DNSLELSQLENK.I                            | 2 | 2.90 | 0.20 |       |
| IPI00005859 | Keratin, type II cytoskeletal 75                                     | R.VSINGCGSSCRSGFGGR.A                       | 2 | 2.15 | 0.21 | -5.89 |
| IPI00005908 | ADAMTS-1 precursor                                                   | A.LGRPSEEEELVPELER.A                        | 2 | 5.47 | 0.48 | -2.95 |
| IPI00005908 | ADAMTS-1 precursor                                                   | A.LGRPSEEEELVPELER.A                        | 3 | 4.29 | 0.18 | -2.77 |
| IPI00005908 | ADAMTS-1 precursor                                                   | A.LGRPSEEEELVPELERAPGHGTR.L                 | 3 | 4.94 | 0.55 | -4.52 |
| IPI00005908 | ADAMTS-1 precursor                                                   | K.SGSETPLPETDLAHCYFSGTVNGDPSSAAALSLCEGVR.G  | 3 | 6.17 | 0.57 | -3.01 |
| IPI00005908 | ADAMTS-1 precursor                                                   | R.GAFYLLGEAYFIQPLPAASER.L                   | 2 | 5.22 | 0.57 | -5.89 |
| IPI00005908 | ADAMTS-1 precursor                                                   | R.GAFYLLGEAYFIQPLPAASER.L                   | 3 | 5.65 | 0.47 | -5.83 |
| IPI00005908 | ADAMTS-1 precursor                                                   | R.KSGSETPLPETDLAHCYFSGTVNGDPSSAAALSLCEGVR.G | 3 | 6.92 | 0.47 |       |
| IPI00005908 | ADAMTS-1 precursor                                                   | R.LHAFDQQLDLELRPDSSFLAPGFTLQNVGR.K          | 3 | 6.17 | 0.52 | -5.50 |
| IPI00005908 | ADAMTS-1 precursor                                                   | R.LHAFDQQLDLELRPDSSFLAPGFTLQNVGRK.S         | 3 | 6.23 | 0.61 | -5.44 |
| IPI00005908 | ADAMTS-1 precursor                                                   | R.LHAFDQQLDLELRPDSSFLAPGFTLQNVGRK.S         | 4 | 4.20 | 0.45 | -5.46 |
| IPI00005969 | F-actin-capping protein subunit alpha-1                              | K.DVQDSLTVSNEAQTAK.E                        | 2 | 2.85 | 0.28 | -4.30 |
| IPI00005981 | Transgelin-3                                                         | K.GASQAGM*TYGGM*PR.Q                        | 2 | 3.55 | 0.56 | -1.72 |
| IPI00005981 | Transgelin-3                                                         | K.LVDWIIQCAEDIEHPPPGR.A                     | 3 | 4.66 | 0.37 | -2.21 |
| IPI00005981 | Transgelin-3                                                         | K.YDADLENK.L                                | 2 | 2.20 | 0.10 | -2.70 |
| IPI00005981 | Transgelin-3                                                         | R.RGFSEEQLR.Q                               | 2 | 2.08 | 0.07 | -2.02 |
| IPI00005981 | Transgelin-3                                                         | R.TLM*ALGSVAATK.D                           | 2 | 2.80 | 0.26 | -3.54 |
| IPI00006009 | Isoform 2 of Pleckstrin homology domain-containing family B member 1 | K.TALLEANSTPVR.V                            | 2 | 2.87 | 0.31 | -3.41 |
| IPI00006009 | Isoform 2 of Pleckstrin homology domain-containing family B member 1 | R.SRDGLLTVNLR.E                             | 2 | 2.50 | 0.22 | -2.37 |
| IPI00006034 | Cysteine-rich protein 2                                              | K.GVNIGGAGSYIYEKPLAEGPQVTGPIEVPAAR.A        | 3 | 6.83 | 0.53 | -1.82 |
| IPI00006034 | Cysteine-rich protein 2                                              | K.GVNTGAVGSIYDRDPEGK.V                      | 3 | 2.59 | 0.10 | -1.99 |
| IPI00006054 | Syntrophin                                                           | K.EDGTGESAGGSPAR.S                          | 3 | 2.99 | 0.26 |       |
| IPI00006094 | Regulating synaptic membrane exocytosis protein 3                    | R.LGAESQFSDFLDGLGPAQIVGR.Q                  | 2 | 2.24 | 0.12 |       |
| IPI00006114 | Pigment epithelium-derived factor precursor                          | A.AAVSNFGYDLYR.V                            | 1 | 2.42 | 0.40 | -3.47 |



|             |                                             |                                            |   |      |      |       |
|-------------|---------------------------------------------|--------------------------------------------|---|------|------|-------|
| IPI00006114 | Pigment epithelium-derived factor precursor | A.AAVSNFGYDLYR.V                           | 2 | 4.00 | 0.43 | -3.38 |
| IPI00006114 | Pigment epithelium-derived factor precursor | A.GFEWNEDGAGTTPSPGLQPAHLTFPLDYHLNQPFIVLR.D | 4 | 5.08 | 0.43 | -3.07 |
| IPI00006114 | Pigment epithelium-derived factor precursor | A.LYYDLISSPDIHGTYKELLDTVTAPQK.N            | 3 | 6.11 | 0.55 | -3.17 |
| IPI00006114 | Pigment epithelium-derived factor precursor | A.SPPEEGSPDPDSTGALVEEEDPFFKVPVNK.L         | 3 | 4.23 | 0.51 | -1.07 |
| IPI00006114 | Pigment epithelium-derived factor precursor | D.PDSTGALVEEEDPFFKVPVNK.L                  | 3 | 4.36 | 0.44 | -1.31 |
| IPI00006114 | Pigment epithelium-derived factor precursor | D.PFFKVPVNK.L                              | 2 | 2.93 | 0.16 | -0.63 |
| IPI00006114 | Pigment epithelium-derived factor precursor | D.TDTGALLFIGK.I                            | 2 | 3.79 | 0.30 | -3.08 |
| IPI00006114 | Pigment epithelium-derived factor precursor | E.IPDEISILLGVAHFK.G                        | 2 | 3.94 | 0.45 | -3.49 |
| IPI00006114 | Pigment epithelium-derived factor precursor | E.IPDEISILLGVAHFK.G                        | 3 | 5.26 | 0.51 | -4.02 |
| IPI00006114 | Pigment epithelium-derived factor precursor | I.PDEISILLGVAHFK.G                         | 2 | 5.29 | 0.58 | -5.35 |
| IPI00006114 | Pigment epithelium-derived factor precursor | I.PDEISILLGVAHFK.G                         | 3 | 6.15 | 0.45 | -3.73 |
| IPI00006114 | Pigment epithelium-derived factor precursor | I.SSPDIHGTYK.E                             | 1 | 2.38 | 0.40 | -2.23 |
| IPI00006114 | Pigment epithelium-derived factor precursor | I.SSPDIHGTYKELLDTVTAPQK.N                  | 2 | 4.87 | 0.48 | -5.25 |
| IPI00006114 | Pigment epithelium-derived factor precursor | K.EIPDEISILLGVAHFK.G                       | 2 | 5.69 | 0.50 | -6.04 |
| IPI00006114 | Pigment epithelium-derived factor precursor | K.EIPDEISILLGVAHFK.G                       | 3 | 1.71 | 0.21 | -4.56 |
| IPI00006114 | Pigment epithelium-derived factor precursor | K.EIPDEISILLGVAHFKG.Q                      | 2 | 2.90 | 0.36 | -5.58 |
| IPI00006114 | Pigment epithelium-derived factor precursor | K.ELLDTVTAPQK.N                            | 1 | 2.52 | 0.22 | -3.50 |
| IPI00006114 | Pigment epithelium-derived factor precursor | K.ELLDTVTAPQK.N                            | 2 | 3.61 | 0.32 | -3.07 |
| IPI00006114 | Pigment epithelium-derived factor precursor | K.IAQLPLTGSM*SIIFFLPLK.V                   | 2 | 6.12 | 0.55 | -5.63 |
| IPI00006114 | Pigment epithelium-derived factor precursor | K.IAQLPLTGSM*SIIFFLPLK.V                   | 3 | 5.23 | 0.38 | -6.60 |
| IPI00006114 | Pigment epithelium-derived factor precursor | K.IAQLPLTGSM*SIIFFLPLK.V                   | 2 | 6.19 | 0.55 | -3.70 |
| IPI00006114 | Pigment epithelium-derived factor precursor | K.IAQLPLTGSM*SIIFFLPLK.V                   | 3 | 3.66 | 0.29 | -3.24 |
| IPI00006114 | Pigment epithelium-derived factor precursor | K.ITGKPIKLTQVEHR.A                         | 2 | 3.89 | 0.33 | -4.20 |
| IPI00006114 | Pigment epithelium-derived factor precursor | K.ITGKPIKLTQVEHR.A                         | 3 | 3.00 | 0.27 | -3.43 |
| IPI00006114 | Pigment epithelium-derived factor precursor | K.ITGKPIKLTQVEHR.A                         | 4 | 2.49 | 0.19 | -5.10 |
| IPI00006114 | Pigment epithelium-derived factor precursor | K.LAAAVSNFGYDL.Y                           | 1 | 2.36 | 0.22 | -2.21 |
| IPI00006114 | Pigment epithelium-derived factor precursor | K.LAAAVSNFGYDLYR.V                         | 1 | 3.35 | 0.57 | -2.78 |
| IPI00006114 | Pigment epithelium-derived factor precursor | K.LAAAVSNFGYDLYR.V                         | 2 | 4.82 | 0.57 | -8.47 |
| IPI00006114 | Pigment epithelium-derived factor precursor | K.LAAAVSNFGYDLYR.V                         | 3 | 5.53 | 0.53 | -1.91 |
| IPI00006114 | Pigment epithelium-derived factor precursor | K.LKLSYEGETVK.S                            | 1 | 2.83 | 0.31 | -3.52 |
| IPI00006114 | Pigment epithelium-derived factor precursor | K.LKLSYEGETVK.S                            | 2 | 3.96 | 0.43 | -7.04 |
| IPI00006114 | Pigment epithelium-derived factor precursor | K.LKLSYEGETVK.S                            | 3 | 4.20 | 0.32 | -5.10 |
| IPI00006114 | Pigment epithelium-derived factor precursor | K.LQSLFDSPDFSK.I                           | 1 | 2.94 | 0.48 | -4.30 |
| IPI00006114 | Pigment epithelium-derived factor precursor | K.LQSLFDSPDFSK.I                           | 2 | 4.06 | 0.42 | -5.19 |
| IPI00006114 | Pigment epithelium-derived factor precursor | K.LQSLFDSPDFSKITGKPIK.L                    | 3 | 2.59 | 0.08 | -3.33 |
| IPI00006114 | Pigment epithelium-derived factor precursor | K.LQSLFDSPDFSKITGKPIK.L                    | 4 | 3.59 | 0.29 | -3.05 |
| IPI00006114 | Pigment epithelium-derived factor precursor | K.LSYEGETVK.S                              | 1 | 2.17 | 0.12 | -4.17 |
| IPI00006114 | Pigment epithelium-derived factor precursor | K.LSYEGETVK.S                              | 2 | 2.84 | 0.29 | -2.14 |
| IPI00006114 | Pigment epithelium-derived factor precursor | K.SLQEM*KLQSLFDSPDFSK.I                    | 2 | 4.18 | 0.44 | -2.61 |
| IPI00006114 | Pigment epithelium-derived factor precursor | K.SLQEM*KLQSLFDSPDFSK.I                    | 3 | 4.34 | 0.43 | -2.87 |
| IPI00006114 | Pigment epithelium-derived factor precursor | K.SSFVAPLEK.S                              | 1 | 2.41 | 0.31 | -3.80 |
| IPI00006114 | Pigment epithelium-derived factor precursor | K.SSFVAPLEK.S                              | 2 | 2.51 | 0.14 | -1.73 |

|             |                                             |                                              |   |      |      |       |
|-------------|---------------------------------------------|----------------------------------------------|---|------|------|-------|
| IPI00006114 | Pigment epithelium-derived factor precursor | K.TSLEDFYLDEER.T                             | 1 | 1.71 | 0.37 | -3.08 |
| IPI00006114 | Pigment epithelium-derived factor precursor | K.TSLEDFYLDEER.T                             | 2 | 4.45 | 0.48 | -4.30 |
| IPI00006114 | Pigment epithelium-derived factor precursor | K.TSLEDFYLDEERTVR.V                          | 3 | 2.63 | 0.22 | -2.48 |
| IPI00006114 | Pigment epithelium-derived factor precursor | K.TVQAVLTVPK.L                               | 1 | 1.59 | 0.13 | 0.02  |
| IPI00006114 | Pigment epithelium-derived factor precursor | K.TVQAVLTVPK.L                               | 2 | 3.59 | 0.37 | -3.83 |
| IPI00006114 | Pigment epithelium-derived factor precursor | K.VTQNLTLIEESLTSEFIHDIDRELK.T                | 4 | 3.44 | 0.12 | -4.69 |
| IPI00006114 | Pigment epithelium-derived factor precursor | L.LDTVAPQK.N                                 | 1 | 1.84 | 0.22 | -3.23 |
| IPI00006114 | Pigment epithelium-derived factor precursor | L.LSPLSVATALSALS LGAEQR.T                    | 2 | 4.24 | 0.34 | -2.17 |
| IPI00006114 | Pigment epithelium-derived factor precursor | L.LSPLSVATALSALS LGAEQR.T                    | 3 | 3.61 | 0.28 | -3.74 |
| IPI00006114 | Pigment epithelium-derived factor precursor | L.SALS LGAEQR.T                              | 1 | 1.92 | 0.24 | 0.28  |
| IPI00006114 | Pigment epithelium-derived factor precursor | L.SVATALSALS LGAEQR.T                        | 2 | 4.22 | 0.24 | -4.66 |
| IPI00006114 | Pigment epithelium-derived factor precursor | L.TGSM*SIIFFLPK.V                            | 2 | 3.30 | 0.30 | -4.28 |
| IPI00006114 | Pigment epithelium-derived factor precursor | L.YYDLISSPDIHGTYK.E                          | 2 | 5.08 | 0.55 | -2.87 |
| IPI00006114 | Pigment epithelium-derived factor precursor | L.YYDLISSPDIHGTYKELLDTVAPQK.N                | 3 | 4.77 | 0.49 | -1.92 |
| IPI00006114 | Pigment epithelium-derived factor precursor | M.KLQSLFSDPDFSK.I                            | 2 | 4.13 | 0.44 | -3.38 |
| IPI00006114 | Pigment epithelium-derived factor precursor | M.SIIFFLPK.V                                 | 2 | 3.12 | 0.22 | -2.59 |
| IPI00006114 | Pigment epithelium-derived factor precursor | M.SPTTNVLLSPLSVATALSALS LGAEQR.T             | 3 | 5.04 | 0.37 | -3.34 |
| IPI00006114 | Pigment epithelium-derived factor precursor | N.PASPPEEGSPDPDSTGALVEEEDPFFKVPVNK.L         | 3 | 4.68 | 0.58 | -3.44 |
| IPI00006114 | Pigment epithelium-derived factor precursor | N.VLLSPLSVATALSALS LGAEQR.T                  | 2 | 6.03 | 0.60 | -3.59 |
| IPI00006114 | Pigment epithelium-derived factor precursor | N.VLLSPLSVATALSALS LGAEQR.T                  | 3 | 5.13 | 0.53 | -4.62 |
| IPI00006114 | Pigment epithelium-derived factor precursor | Q.SLFDSPDFSK.I                               | 1 | 2.35 | 0.25 | -3.34 |
| IPI00006114 | Pigment epithelium-derived factor precursor | R.AGFEWNEDGAGTTPSPGLQPAHLTFPLDYHLNQPFI       | 3 | 5.31 | 0.49 | -3.73 |
| IPI00006114 | Pigment epithelium-derived factor precursor | R.AGFEWNEDGAGTTPSPGLQPAHLTFPLDYHLNQPFI.VLR.D | 3 | 7.10 | 0.63 | -4.17 |
| IPI00006114 | Pigment epithelium-derived factor precursor | R.AGFEWNEDGAGTTPSPGLQPAHLTFPLDYHLNQPFI.VLR.D | 4 | 6.33 | 0.48 | -6.46 |
| IPI00006114 | Pigment epithelium-derived factor precursor | R.ALYYDLISSPDIHGTYK.E                        | 2 | 5.98 | 0.52 | -4.25 |
| IPI00006114 | Pigment epithelium-derived factor precursor | R.ALYYDLISSPDIHGTYK.E                        | 3 | 3.26 | 0.43 | -5.66 |
| IPI00006114 | Pigment epithelium-derived factor precursor | R.ALYYDLISSPDIHGTYKELLDTVAPQK.N              | 2 | 3.93 | 0.57 | -4.50 |
| IPI00006114 | Pigment epithelium-derived factor precursor | R.ALYYDLISSPDIHGTYKELLDTVAPQK.N              | 3 | 7.04 | 0.60 | -6.20 |
| IPI00006114 | Pigment epithelium-derived factor precursor | R.ALYYDLISSPDIHGTYKELLDTVAPQK.N              | 4 | 4.85 | 0.54 | -5.37 |
| IPI00006114 | Pigment epithelium-derived factor precursor | R.ALYYDLISSPDIHGTYKELLDTVAPQKNLK.S           | 3 | 5.46 | 0.50 | -3.68 |
| IPI00006114 | Pigment epithelium-derived factor precursor | R.ALYYDLISSPDIHGTYKELLDTVAPQKNLK.S           | 4 | 4.40 | 0.35 | -4.28 |
| IPI00006114 | Pigment epithelium-derived factor precursor | R.DTDTGALLFIGK.I                             | 1 | 3.01 | 0.31 | -6.00 |
| IPI00006114 | Pigment epithelium-derived factor precursor | R.DTDTGALLFIGK.I                             | 2 | 4.35 | 0.42 | -4.50 |
| IPI00006114 | Pigment epithelium-derived factor precursor | R.DTDTGALLFIGK.I                             | 3 | 3.45 | 0.08 | -3.45 |
| IPI00006114 | Pigment epithelium-derived factor precursor | R.DTDTGALLFIGKILDPR.G                        | 3 | 3.34 | 0.33 | -4.32 |
| IPI00006114 | Pigment epithelium-derived factor precursor | R.DTDTGALLFIGKILDPRGP.-                      | 3 | 5.01 | 0.42 | -3.68 |
| IPI00006114 | Pigment epithelium-derived factor precursor | R.ELKTVQAVLTVPK.L                            | 2 | 4.10 | 0.35 | -3.59 |
| IPI00006114 | Pigment epithelium-derived factor precursor | R.IKSSFVAPLEK.S                              | 1 | 2.72 | 0.27 | -3.57 |
| IPI00006114 | Pigment epithelium-derived factor precursor | R.IKSSFVAPLEK.S                              | 2 | 3.56 | 0.32 | -3.61 |
| IPI00006114 | Pigment epithelium-derived factor precursor | R.IKSSFVAPLEK.S                              | 3 | 3.60 | 0.27 | -4.48 |
| IPI00006114 | Pigment epithelium-derived factor precursor | R.KTSLEDFYLDEER.T                            | 1 | 3.58 | 0.50 | -2.73 |
| IPI00006114 | Pigment epithelium-derived factor precursor | R.KTSLEDFYLDEER.T                            | 2 | 4.61 | 0.47 | -5.64 |

|             |                                             |                                             |   |      |      |       |
|-------------|---------------------------------------------|---------------------------------------------|---|------|------|-------|
| IPI00006114 | Pigment epithelium-derived factor precursor | R.KTSLEDFYLDEER.T                           | 3 | 4.17 | 0.35 | -2.91 |
| IPI00006114 | Pigment epithelium-derived factor precursor | R.KTSLEDFYLDEERTVR.V                        | 2 | 3.85 | 0.38 | -3.47 |
| IPI00006114 | Pigment epithelium-derived factor precursor | R.LDLQEINNWWQAQM*K.G                        | 2 | 5.37 | 0.51 | -5.08 |
| IPI00006114 | Pigment epithelium-derived factor precursor | R.LDLQEINNWWQAQM*K.G                        | 3 | 5.22 | 0.43 | -3.90 |
| IPI00006114 | Pigment epithelium-derived factor precursor | R.LDLQEINNWWQAQMK.G                         | 2 | 4.40 | 0.43 | -3.11 |
| IPI00006114 | Pigment epithelium-derived factor precursor | R.LDLQEINNWWQAQMK.G                         | 3 | 2.71 | 0.15 | -3.14 |
| IPI00006114 | Pigment epithelium-derived factor precursor | R.SSM*SPTTNVLLSPLSVATALSALS LGAEQR.T        | 2 | 5.79 | 0.61 | -4.54 |
| IPI00006114 | Pigment epithelium-derived factor precursor | R.SSM*SPTTNVLLSPLSVATALSALS LGAEQR.T        | 3 | 5.95 | 0.53 | -7.88 |
| IPI00006114 | Pigment epithelium-derived factor precursor | R.SSM*SPTTNVLLSPLSVATALSALS LGAEQR.T        | 4 | 5.04 | 0.48 | -4.38 |
| IPI00006114 | Pigment epithelium-derived factor precursor | R.SSM*SPTTNVLLSPLSVATALSALS LGAEQR.TESIHR.A | 4 | 5.58 | 0.43 | -3.15 |
| IPI00006114 | Pigment epithelium-derived factor precursor | R.STKEIPDEISILLGV AHFK.G                    | 2 | 4.59 | 0.49 | -5.94 |
| IPI00006114 | Pigment epithelium-derived factor precursor | R.STKEIPDEISILLGV AHFK.G                    | 3 | 6.37 | 0.48 | -6.65 |
| IPI00006114 | Pigment epithelium-derived factor precursor | R.STKEIPDEISILLGV AHFK.G                    | 4 | 4.62 | 0.39 | -4.06 |
| IPI00006114 | Pigment epithelium-derived factor precursor | R.TESIHR.A                                  | 2 | 2.42 | 0.16 | -4.99 |
| IPI00006114 | Pigment epithelium-derived factor precursor | R.TVRVPM*M*SDPK.A                           | 3 | 1.89 | 0.11 | -1.64 |
| IPI00006114 | Pigment epithelium-derived factor precursor | R.VLTGNPR.L                                 | 1 | 1.91 | 0.17 | -2.78 |
| IPI00006114 | Pigment epithelium-derived factor precursor | R.VRSSM*SPTTNVLLSPLSVATALSALS LGAEQR.T      | 3 | 4.14 | 0.33 | -4.14 |
| IPI00006114 | Pigment epithelium-derived factor precursor | R.YGLDSDL SCK.I                             | 1 | 2.77 | 0.44 | -3.90 |
| IPI00006114 | Pigment epithelium-derived factor precursor | R.YGLDSDL SCK.I                             | 2 | 3.26 | 0.46 | -2.41 |
| IPI00006114 | Pigment epithelium-derived factor precursor | S.PGLQPAHLTFPLDYHLNQPFIFVLR.D               | 3 | 5.56 | 0.52 | -3.26 |
| IPI00006114 | Pigment epithelium-derived factor precursor | S.PLSVATALSALS LGAEQR.T                     | 2 | 3.42 | 0.39 | -2.88 |
| IPI00006114 | Pigment epithelium-derived factor precursor | S.PPEEGSPDPDSTGALVEEEDPFFKVPV NK.L          | 2 | 3.82 | 0.42 | 0.03  |
| IPI00006114 | Pigment epithelium-derived factor precursor | S.PPEEGSPDPDSTGALVEEEDPFFKVPV NK.L          | 3 | 6.12 | 0.49 | -2.05 |
| IPI00006114 | Pigment epithelium-derived factor precursor | T.PSPGLQPAHLTFPLDYHLNQPFIFVLR.D             | 3 | 5.45 | 0.52 | -4.01 |
| IPI00006114 | Pigment epithelium-derived factor precursor | V.LLSPLSVATALSALS LGAEQR.T                  | 2 | 5.47 | 0.52 | -2.87 |
| IPI00006114 | Pigment epithelium-derived factor precursor | V.QAVLTVPK.L                                | 1 | 1.90 | 0.22 | 0.63  |
| IPI00006114 | Pigment epithelium-derived factor precursor | V.SNFGYDLR.V                                | 1 | 1.82 | 0.17 | -2.40 |
| IPI00006114 | Pigment epithelium-derived factor precursor | W.NEDGAGTTPSPGLQPAHLTFPLDYHLNQPFIFVLR.D     | 3 | 3.86 | 0.33 | -5.48 |
| IPI00006114 | Pigment epithelium-derived factor precursor | W.NEDGAGTTPSPGLQPAHLTFPLDYHLNQPFIFVLR.D     | 4 | 4.77 | 0.49 | -2.62 |
| IPI00006114 | Pigment epithelium-derived factor precursor | Y.DLISSPD IHGTYK.E                          | 2 | 2.94 | 0.24 | -1.36 |
| IPI00006114 | Pigment epithelium-derived factor precursor | Y.DLISSPD IHGTYKELLDTVTAPQK.N               | 3 | 3.81 | 0.32 | 0.47  |
| IPI00006114 | Pigment epithelium-derived factor precursor | Y.YDLISSPD IHGTYK.E                         | 2 | 4.13 | 0.48 | -2.00 |
| IPI00006114 | Pigment epithelium-derived factor precursor | Y.YDLISSPD IHGTYKELLDTVTAPQK.N              | 3 | 4.59 | 0.47 | -3.99 |
| IPI00006128 | Testican-2 precursor                        | E.DEQWLSSISQYSGK.I                          | 2 | 4.42 | 0.52 | -4.98 |
| IPI00006128 | Testican-2 precursor                        | K.DSIGWM*FSK.L                              | 2 | 2.78 | 0.25 | -1.50 |
| IPI00006128 | Testican-2 precursor                        | K.EGETPGNFM*EDEQWLSSISQYSGK.I               | 2 | 4.51 | 0.63 | -4.58 |
| IPI00006128 | Testican-2 precursor                        | K.EGETPGNFM*EDEQWLSSISQYSGK.I               | 3 | 4.94 | 0.51 | -5.40 |
| IPI00006128 | Testican-2 precursor                        | K.GLKEGETPGNFM*EDEQWLSSISQYSGK.I            | 2 | 4.90 | 0.59 | -2.77 |
| IPI00006128 | Testican-2 precursor                        | K.GLKEGETPGNFM*EDEQWLSSISQYSGK.I            | 3 | 5.55 | 0.59 | -3.38 |
| IPI00006128 | Testican-2 precursor                        | K.LEQQACLSSK.Q                              | 2 | 3.47 | 0.38 | -1.43 |
| IPI00006128 | Testican-2 precursor                        | R.FRDEVEDDYIK.S                             | 2 | 2.83 | 0.18 | -3.40 |
| IPI00006128 | Testican-2 precursor                        | R.FRDEVEDDYIK.S                             | 3 | 3.33 | 0.10 | -2.59 |

|             |                                                                 |                                        |   |      |      |       |
|-------------|-----------------------------------------------------------------|----------------------------------------|---|------|------|-------|
| IPI00006128 | Testican-2 precursor                                            | R.FRDEVEDDYIKSWEDNQQG.D                | 2 | 5.79 | 0.55 | -3.19 |
| IPI00006130 | Uncharacterized calcium-binding protein KIAA0494                | K.FSQFLGDPVEK.A                        | 2 | 2.52 | 0.17 |       |
| IPI00006130 | Uncharacterized calcium-binding protein KIAA0494                | K.IQSIKKEDSSNSQVSK.L                   | 2 | 4.77 | 0.53 | -4.00 |
| IPI00006130 | Uncharacterized calcium-binding protein KIAA0494                | K.IQSIKKEDSSNSQVSK.L                   | 3 | 3.24 | 0.22 | -3.04 |
| IPI00006130 | Uncharacterized calcium-binding protein KIAA0494                | K.IQSIKKEDSSNSQVSK.L                   | 4 | 3.01 | 0.06 | -3.25 |
| IPI00006130 | Uncharacterized calcium-binding protein KIAA0494                | R.AFDSGDGGRYSFLELR.V                   | 3 | 3.17 | 0.30 | -1.12 |
| IPI00006146 | serum amyloid A2                                                | R.SFFSFLGEAFD GAR.D                    | 2 | 4.87 | 0.45 |       |
| IPI00006154 | Isoform Long of Complement factor H-related protein 2 precursor | K.CLDPCVISQEIM*EK.Y                    | 2 | 2.83 | 0.08 |       |
| IPI00006154 | Isoform Long of Complement factor H-related protein 2 precursor | K.INHGILYDEEK.Y                        | 2 | 3.57 | 0.37 | -3.89 |
| IPI00006154 | Isoform Long of Complement factor H-related protein 2 precursor | K.YKPFSQVPTGEV FYYSCEYNFVSPSK.S        | 3 | 4.07 | 0.27 |       |
| IPI00006154 | Isoform Long of Complement factor H-related protein 2 precursor | R.LCFFPFVENGHSESSGQTHLEGDTVQIICNTGYR.L | 3 | 5.60 | 0.33 |       |
| IPI00006154 | Isoform Long of Complement factor H-related protein 2 precursor | R.LQNNENNISCV ER.G                     | 2 | 3.88 | 0.44 | -0.87 |
| IPI00006154 | Isoform Long of Complement factor H-related protein 2 precursor | R.TGDIVEFVCK.S                         | 2 | 3.16 | 0.41 | -2.96 |
| IPI00006166 | Probable G-protein coupled receptor 37 precursor                | A.FLAGPSWDLPAAPGRDPAAGR.G              | 3 | 3.64 | 0.22 | -1.80 |
| IPI00006166 | Probable G-protein coupled receptor 37 precursor                | K.TVPGASDLFYWPR.R                      | 2 | 3.16 | 0.25 | -4.28 |
| IPI00006166 | Probable G-protein coupled receptor 37 precursor                | L.FLQISEEEEEKGPR.G                     | 2 | 4.36 | 0.42 | -2.47 |
| IPI00006166 | Probable G-protein coupled receptor 37 precursor                | R.EEQGAAFLAGPSWDLPAAPGRDPAAGR.G        | 3 | 4.83 | 0.55 | -4.91 |
| IPI00006166 | Probable G-protein coupled receptor 37 precursor                | R.GQEPSETLGR.G                         | 1 | 1.62 | 0.11 | -7.79 |
| IPI00006166 | Probable G-protein coupled receptor 37 precursor                | R.GQEPSETLGR.G                         | 2 | 3.21 | 0.32 | -4.67 |
| IPI00006252 | Multisynthetase complex auxiliary component p43                 | N.NDAVLKRLEQKGA EADQIIEYLK.Q           | 3 | 3.74 | 0.12 | -0.72 |
| IPI00006444 | Isoform 1 of Sodium/potassium/calcium exchanger 2 precursor     | A.FSETDTQSTGEASV VSGPR.V               | 2 | 6.14 | 0.61 | -2.77 |
| IPI00006444 | Isoform 1 of Sodium/potassium/calcium exchanger 2 precursor     | F.SETDTQSTGEASV VSGPR.V                | 2 | 5.25 | 0.52 | -2.40 |
| IPI00006444 | Isoform 1 of Sodium/potassium/calcium exchanger 2 precursor     | S.ETDTQSTGEASV VSGPR.V                 | 2 | 5.09 | 0.54 | -3.14 |
| IPI00006451 | Vesicle-fusing ATPase                                           | K.AENSSLNLIGK.A                        | 2 | 2.84 | 0.29 | -2.57 |
| IPI00006451 | Vesicle-fusing ATPase                                           | K.DIEAM*DPSILK.G                       | 2 | 3.32 | 0.20 | -3.31 |
| IPI00006451 | Vesicle-fusing ATPase                                           | K.THPSVVPGSIAFSLPQR.K                  | 3 | 2.44 | 0.20 | -2.85 |
| IPI00006451 | Vesicle-fusing ATPase                                           | R.YTFTLK.T                             | 1 | 1.77 | 0.09 | -1.40 |
| IPI00006470 | Neuron-specific protein family member 2                         | K.GTKPPSVEDGFQTVPLITPLEVNH LQ.L        | 3 | 3.96 | 0.34 | -2.59 |

|             |                                                                                |                                          |   |      |      |       |
|-------------|--------------------------------------------------------------------------------|------------------------------------------|---|------|------|-------|
| IPI00006482 | Isoform Long of Sodium/potassium-transporting ATPase subunit alpha-1 precursor | K.EQPLDEELKDAFQAYLELGLGER.V              | 3 | 4.16 | 0.36 | -3.90 |
| IPI00006482 | Isoform Long of Sodium/potassium-transporting ATPase subunit alpha-1 precursor | K.LSLDELHRK.Y                            | 2 | 2.21 | 0.11 | -3.15 |
| IPI00006482 | Isoform Long of Sodium/potassium-transporting ATPase subunit alpha-1 precursor | K.QAADMILLDDNFASIVTGVVEEGR.L             | 2 | 5.62 | 0.61 | -2.21 |
| IPI00006482 | Isoform Long of Sodium/potassium-transporting ATPase subunit alpha-1 precursor | K.QAADMILLDDNFASIVTGVVEEGR.L             | 3 | 4.80 | 0.48 | -1.61 |
| IPI00006482 | Isoform Long of Sodium/potassium-transporting ATPase subunit alpha-1 precursor | K.VDNSSLTGESEPQTR.S                      | 2 | 4.55 | 0.40 | -2.59 |
| IPI00006482 | Isoform Long of Sodium/potassium-transporting ATPase subunit alpha-1 precursor | R.LNIPVSQVNPR.D                          | 2 | 2.30 | 0.13 | -1.37 |
| IPI00006510 | Tubulin beta-1 chain                                                           | K.AVLEEDVEEVTEEAEMEPEDK.G                | 2 | 5.11 | 0.49 | -3.97 |
| IPI00006510 | Tubulin beta-1 chain                                                           | K.AVLEEDVEEVTEEAEMEPEDK.G                | 3 | 2.33 | 0.16 | -4.47 |
| IPI00006510 | Tubulin beta-1 chain                                                           | K.AVLEEDVEEVTEEAEMEPEDKGH.-              | 2 | 3.72 | 0.44 | -3.30 |
| IPI00006510 | Tubulin beta-1 chain                                                           | K.AVLEEDVEEVTEEAEMEPEDKGH.-              | 3 | 2.89 | 0.37 | -4.52 |
| IPI00006524 | Uncharacterized protein KIAA0319 precursor                                     | K.TSVDSPVLR.L                            | 2 | 2.20 | 0.07 | -0.59 |
| IPI00006524 | Uncharacterized protein KIAA0319 precursor                                     | R.TYSNAVISPNLETR.I                       | 2 | 5.16 | 0.49 | -3.10 |
| IPI00006556 | hypothetical protein LOC9865                                                   | R.LEELYLGNLLQALAPGTLAPLRK.L              | 3 | 3.44 | 0.37 | -3.15 |
| IPI00006556 | hypothetical protein LOC9865                                                   | R.LSQLPTALLEPLHLEALDLSGNELSAHPATFGHLGR.L | 5 | 5.21 | 0.41 | -3.74 |
| IPI00006556 | hypothetical protein LOC9865                                                   | R.NNALSALSGDIFAASPALYR.L                 | 2 | 4.46 | 0.55 | -4.06 |
| IPI00006556 | hypothetical protein LOC9865                                                   | R.NNALSALSGDIFAASPALYR.L                 | 3 | 3.94 | 0.37 | -3.48 |
| IPI00006601 | Secretogranin-1 precursor                                                      | A.DASEAHSSSRGEAGAPGEEDIQGPTK.A           | 3 | 5.66 | 0.49 | -3.03 |
| IPI00006601 | Secretogranin-1 precursor                                                      | A.DEPQWSLYPSDSQVSEEVKTR.H                | 2 | 3.95 | 0.47 | -4.22 |
| IPI00006601 | Secretogranin-1 precursor                                                      | A.PGEEDIQGPTK.A                          | 1 | 3.08 | 0.28 | -3.01 |
| IPI00006601 | Secretogranin-1 precursor                                                      | A.PGEEDIQGPTKADTEK.W                     | 2 | 4.13 | 0.44 | -2.22 |
| IPI00006601 | Secretogranin-1 precursor                                                      | C.IIEVLSNALSK.S                          | 2 | 4.12 | 0.31 | -3.04 |
| IPI00006601 | Secretogranin-1 precursor                                                      | D.FYDSEEPVSTHQAENEKDR.A                  | 3 | 3.54 | 0.52 | -2.54 |
| IPI00006601 | Secretogranin-1 precursor                                                      | D.PADASEAHSSSRGEAGAPGEEDIQGPTK.A         | 4 | 4.69 | 0.44 | -2.23 |
| IPI00006601 | Secretogranin-1 precursor                                                      | D.RSSQGGSLPSEEK.G                        | 2 | 3.71 | 0.20 | -3.71 |
| IPI00006601 | Secretogranin-1 precursor                                                      | E.AGSQENHPQESK.G                         | 2 | 3.37 | 0.33 | -2.49 |
| IPI00006601 | Secretogranin-1 precursor                                                      | E.KSSQESGEEAGSQENHPQESK.G                | 3 | 4.56 | 0.46 | -3.09 |
| IPI00006601 | Secretogranin-1 precursor                                                      | E.LDRNYLNYGEEGAPGK.W                     | 2 | 4.04 | 0.37 | -2.28 |
| IPI00006601 | Secretogranin-1 precursor                                                      | E.LDRNYLNYGEEGAPGK.W                     | 3 | 4.98 | 0.29 | -1.98 |
| IPI00006601 | Secretogranin-1 precursor                                                      | F.PDFYDSEEPVSTHQAENEKDR.A                | 3 | 3.92 | 0.52 | -2.10 |
| IPI00006601 | Secretogranin-1 precursor                                                      | G.EAGAPGEEDIQGPTK.A                      | 2 | 3.04 | 0.52 | -4.03 |
| IPI00006601 | Secretogranin-1 precursor                                                      | H.GYGEESEERGLEPGKGR.H                    | 3 | 4.24 | 0.42 | -3.88 |
| IPI00006601 | Secretogranin-1 precursor                                                      | K.ADTEKWAEGGHSR.E                        | 3 | 3.12 | 0.13 | -1.39 |
| IPI00006601 | Secretogranin-1 precursor                                                      | K.DKETTENENTKFEV.R                       | 3 | 4.29 | 0.44 | -1.33 |
| IPI00006601 | Secretogranin-1 precursor                                                      | K.DKETTENENTKFEVR.L                      | 2 | 4.76 | 0.44 | -0.61 |
| IPI00006601 | Secretogranin-1 precursor                                                      | K.DKETTENENTKFEVR.L                      | 3 | 3.50 | 0.31 | -3.94 |
| IPI00006601 | Secretogranin-1 precursor                                                      | K.DRADQTVLTEDEKK.E                       | 2 | 4.17 | 0.37 | -1.99 |

|             |                           |                                           |   |      |      |       |
|-------------|---------------------------|-------------------------------------------|---|------|------|-------|
| IPI00006601 | Secretogranin-1 precursor | K.DRADQTVLTEDEKK.E                        | 3 | 3.36 | 0.23 | -0.29 |
| IPI00006601 | Secretogranin-1 precursor | K.DRADQTVLTEDEKKELENLAAM*DLELQK.I         | 3 | 6.21 | 0.47 | -2.26 |
| IPI00006601 | Secretogranin-1 precursor | K.DRADQTVLTEDEKKELENLAAM*DLELQK.I         | 5 | 3.86 | 0.26 | -1.42 |
| IPI00006601 | Secretogranin-1 precursor | K.DVKDKETTENENTKFEVR.L                    | 2 | 5.34 | 0.49 | -2.14 |
| IPI00006601 | Secretogranin-1 precursor | K.DVKDKETTENENTKFEVR.L                    | 3 | 3.68 | 0.43 | -2.79 |
| IPI00006601 | Secretogranin-1 precursor | K.DVKDKETTENENTKFEVR.L                    | 4 | 2.92 | 0.27 | -2.28 |
| IPI00006601 | Secretogranin-1 precursor | K.ELDRNYLNYGEEGAPGK.W                     | 2 | 4.52 | 0.42 | -4.21 |
| IPI00006601 | Secretogranin-1 precursor | K.ELDRNYLNYGEEGAPGK.W                     | 3 | 4.55 | 0.39 | -3.02 |
| IPI00006601 | Secretogranin-1 precursor | K.ELDRNYLNYGEEGAPGKWQQGGDLQDTKENR.E       | 4 | 4.27 | 0.33 | -2.14 |
| IPI00006601 | Secretogranin-1 precursor | K.ELENLAAM*DLELQK.I                       | 2 | 5.38 | 0.39 | -3.97 |
| IPI00006601 | Secretogranin-1 precursor | K.ELENLAAM*DLELQK.I                       | 3 | 5.82 | 0.30 | -2.29 |
| IPI00006601 | Secretogranin-1 precursor | K.GERGEDSSEKHLEEPGETQNAFLNER.K            | 3 | 6.04 | 0.55 | -3.49 |
| IPI00006601 | Secretogranin-1 precursor | K.GERGEDSSEKHLEEPGETQNAFLNER.K            | 4 | 4.51 | 0.34 | -3.42 |
| IPI00006601 | Secretogranin-1 precursor | K.GHPQEESEESNVSM*.A                       | 2 | 3.93 | 0.53 | -2.50 |
| IPI00006601 | Secretogranin-1 precursor | K.GHPQEESEESNVSM*.AS.L                    | 2 | 3.73 | 0.56 | -3.06 |
| IPI00006601 | Secretogranin-1 precursor | K.GHPQEESEESNVSM*.ASLG.E                  | 2 | 3.43 | 0.52 | -3.04 |
| IPI00006601 | Secretogranin-1 precursor | K.GHPQEESEESNVSM*.ASLGE.K                 | 2 | 4.19 | 0.58 | -3.08 |
| IPI00006601 | Secretogranin-1 precursor | K.GYPGVQAPEDLEWER.Y                       | 2 | 4.62 | 0.47 | -3.48 |
| IPI00006601 | Secretogranin-1 precursor | K.HLEEPGETQNAFLNER.K                      | 2 | 4.61 | 0.49 | -3.31 |
| IPI00006601 | Secretogranin-1 precursor | K.HLEEPGETQNAFLNER.K                      | 3 | 4.36 | 0.39 | -2.63 |
| IPI00006601 | Secretogranin-1 precursor | K.HLEEPGETQNAFLNERK.Q                     | 3 | 3.62 | 0.45 | -0.85 |
| IPI00006601 | Secretogranin-1 precursor | K.KEELVAR.S                               | 1 | 2.17 | 0.06 | -1.71 |
| IPI00006601 | Secretogranin-1 precursor | K.KEELVAR.S                               | 2 | 2.51 | 0.12 | -3.72 |
| IPI00006601 | Secretogranin-1 precursor | K.KELENLAAM*DLELQK.I                      | 2 | 4.81 | 0.38 | -1.86 |
| IPI00006601 | Secretogranin-1 precursor | K.KPFSEVDNWGYE.K                          | 2 | 3.42 | 0.41 | -0.48 |
| IPI00006601 | Secretogranin-1 precursor | K.M*AHGYGEESEEEER.G                       | 2 | 3.95 | 0.54 | -3.50 |
| IPI00006601 | Secretogranin-1 precursor | K.M*AHGYGEESEEEER.G                       | 3 | 3.67 | 0.20 | -2.04 |
| IPI00006601 | Secretogranin-1 precursor | K.M*AHGYGEESEEEERGLEPGK.G                 | 2 | 4.89 | 0.49 | -4.36 |
| IPI00006601 | Secretogranin-1 precursor | K.M*AHGYGEESEEEERGLEPGK.G                 | 3 | 3.01 | 0.31 | -4.46 |
| IPI00006601 | Secretogranin-1 precursor | K.M*AHGYGEESEEEERGLEPGK.G                 | 4 | 3.12 | 0.29 | -5.79 |
| IPI00006601 | Secretogranin-1 precursor | K.M*AHGYGEESEEEERGLEPGKGR.H               | 2 | 3.72 | 0.52 | -4.71 |
| IPI00006601 | Secretogranin-1 precursor | K.M*AHGYGEESEEEERGLEPGKGR.H               | 3 | 2.30 | 0.50 | -3.60 |
| IPI00006601 | Secretogranin-1 precursor | K.M*AHGYGEESEEEERGLEPGKGR.H               | 4 | 4.30 | 0.60 | -4.82 |
| IPI00006601 | Secretogranin-1 precursor | K.QASAIKKEELVA.R                          | 1 | 2.44 | 0.25 | -5.41 |
| IPI00006601 | Secretogranin-1 precursor | K.QASAIKKEELVAR.S                         | 2 | 1.87 | 0.30 | -4.70 |
| IPI00006601 | Secretogranin-1 precursor | K.SAEFPDFYDSEEPVSTH.Q                     | 2 | 4.47 | 0.63 | -1.20 |
| IPI00006601 | Secretogranin-1 precursor | K.SAEFPDFYDSEEPVSTHQAENEK.D               | 3 | 3.27 | 0.44 | -3.91 |
| IPI00006601 | Secretogranin-1 precursor | K.SAEFPDFYDSEEPVSTHQAENEKDR.R             | 3 | 3.89 | 0.54 | -2.49 |
| IPI00006601 | Secretogranin-1 precursor | K.SAEFPDFYDSEEPVSTHQAENEKDR.A             | 2 | 3.47 | 0.53 | -2.64 |
| IPI00006601 | Secretogranin-1 precursor | K.SAEFPDFYDSEEPVSTHQAENEKDR.A             | 3 | 5.51 | 0.59 | -3.64 |
| IPI00006601 | Secretogranin-1 precursor | K.SAEFPDFYDSEEPVSTHQAENEKDR.A             | 4 | 2.67 | 0.37 | -4.33 |
| IPI00006601 | Secretogranin-1 precursor | K.SAEFPDFYDSEEPVSTHQAENEKDRADQTVLTEDEKK.E | 3 | 5.03 | 0.53 | -0.67 |

|             |                           |                                            |   |      |      |       |
|-------------|---------------------------|--------------------------------------------|---|------|------|-------|
| IPI00006601 | Secretogranin-1 precursor | K.SAEFPDFYDSEEPVSTHQEAENEKDRADQTVLTEDEKK.E | 4 | 3.43 | 0.26 | -2.21 |
| IPI00006601 | Secretogranin-1 precursor | K.SAEFPDFYDSEEPVSTHQEAENEKDRADQTVLTEDEKK.E | 6 | 3.24 | 0.12 | -3.29 |
| IPI00006601 | Secretogranin-1 precursor | K.SQREDEEEEEEGENYQK.G                      | 3 | 2.94 | 0.22 | -3.32 |
| IPI00006601 | Secretogranin-1 precursor | K.SQREDEEEEEEGENYQKGER.G                   | 2 | 5.86 | 0.51 | -4.78 |
| IPI00006601 | Secretogranin-1 precursor | K.SQREDEEEEEEGENYQKGER.G                   | 3 | 5.42 | 0.48 | -4.27 |
| IPI00006601 | Secretogranin-1 precursor | K.SSAPPITPECR.Q                            | 2 | 2.82 | 0.35 | -2.47 |
| IPI00006601 | Secretogranin-1 precursor | K.SSQESGEEAGSQENHPQESK.G                   | 2 | 4.88 | 0.63 | -3.75 |
| IPI00006601 | Secretogranin-1 precursor | K.SSQESGEEAGSQENHPQESK.G                   | 3 | 3.37 | 0.39 | -3.48 |
| IPI00006601 | Secretogranin-1 precursor | K.SSQESGEEAGSQENHPQESKGGQPR.S              | 4 | 2.99 | 0.28 | -4.28 |
| IPI00006601 | Secretogranin-1 precursor | K.WQQQDLQDTK.E                             | 2 | 3.90 | 0.36 | -2.29 |
| IPI00006601 | Secretogranin-1 precursor | L.DRNYLNYGEEGAPGK.W                        | 2 | 3.57 | 0.35 | -2.41 |
| IPI00006601 | Secretogranin-1 precursor | L.LRDPADASEAHSSSR.G                        | 2 | 3.61 | 0.34 | -4.80 |
| IPI00006601 | Secretogranin-1 precursor | L.LRDPADASEAHSSSR.G                        | 3 | 4.71 | 0.47 | -3.02 |
| IPI00006601 | Secretogranin-1 precursor | L.LRDPADASEAHSSSRGEAGAPGEEDIQGPTK.A        | 4 | 5.05 | 0.49 | -1.88 |
| IPI00006601 | Secretogranin-1 precursor | L.RDPADASEAHSSSR.G                         | 3 | 4.33 | 0.48 | -2.11 |
| IPI00006601 | Secretogranin-1 precursor | N.YLNYGEEGAPGK.W                           | 1 | 2.81 | 0.26 | -3.26 |
| IPI00006601 | Secretogranin-1 precursor | N.YLNYGEEGAPGK.W                           | 2 | 4.25 | 0.38 | -3.69 |
| IPI00006601 | Secretogranin-1 precursor | P.ADASEAHSSSRGEAGAPGEEDIQGPTK.A            | 3 | 6.33 | 0.48 | -3.21 |
| IPI00006601 | Secretogranin-1 precursor | P.ADASEAHSSSRGEAGAPGEEDIQGPTKADTEK.W       | 3 | 7.42 | 0.57 | -3.42 |
| IPI00006601 | Secretogranin-1 precursor | P.ADASEAHSSSRGEAGAPGEEDIQGPTKADTEK.W       | 4 | 5.75 | 0.52 | -3.42 |
| IPI00006601 | Secretogranin-1 precursor | P.SLELDKM*AHGYGEESEERGLEPGKGR.H            | 3 | 3.61 | 0.41 | -1.78 |
| IPI00006601 | Secretogranin-1 precursor | Q.ASAIKKEELVAR.S                           | 2 | 2.95 | 0.20 | -3.93 |
| IPI00006601 | Secretogranin-1 precursor | R.ADEPQWSLYPSDSQVSEEVK.T                   | 2 | 5.11 | 0.57 | -5.19 |
| IPI00006601 | Secretogranin-1 precursor | R.ADEPQWSLYPSDSQVSEEVK.T                   | 3 | 3.42 | 0.38 | -3.67 |
| IPI00006601 | Secretogranin-1 precursor | R.ADEPQWSLYPSDSQVSEEVKT.R                  | 2 | 3.85 | 0.44 | 0.40  |
| IPI00006601 | Secretogranin-1 precursor | R.ADEPQWSLYPSDSQVSEEVKTR.H                 | 2 | 4.16 | 0.53 | -2.09 |
| IPI00006601 | Secretogranin-1 precursor | R.ADEPQWSLYPSDSQVSEEVKTR.H                 | 3 | 2.84 | 0.25 | -4.21 |
| IPI00006601 | Secretogranin-1 precursor | R.ADQTVLTEDEK.K                            | 2 | 3.35 | 0.28 | -2.73 |
| IPI00006601 | Secretogranin-1 precursor | R.ADQTVLTEDEKK.E                           | 2 | 3.49 | 0.27 | -0.25 |
| IPI00006601 | Secretogranin-1 precursor | R.ADQTVLTEDEKKEL.E                         | 2 | 3.34 | 0.35 | -3.04 |
| IPI00006601 | Secretogranin-1 precursor | R.ADQTVLTEDEKKELEN.L                       | 2 | 3.91 | 0.38 | -2.70 |
| IPI00006601 | Secretogranin-1 precursor | R.ADQTVLTEDEKKELEN.L.A                     | 2 | 4.58 | 0.41 | -3.16 |
| IPI00006601 | Secretogranin-1 precursor | R.ADQTVLTEDEKKELENLAAM*DLE.L               | 3 | 4.27 | 0.40 | -5.05 |
| IPI00006601 | Secretogranin-1 precursor | R.ADQTVLTEDEKKELENLAAM*DLELQ.K             | 3 | 4.32 | 0.37 | -4.39 |
| IPI00006601 | Secretogranin-1 precursor | R.ADQTVLTEDEKKELENLAAM*DLELQK.I            | 2 | 5.46 | 0.51 | -2.91 |
| IPI00006601 | Secretogranin-1 precursor | R.ADQTVLTEDEKKELENLAAM*DLELQK.I            | 3 | 6.32 | 0.47 | -7.12 |
| IPI00006601 | Secretogranin-1 precursor | R.ADQTVLTEDEKKELENLAAM*DLELQK.I            | 4 | 4.80 | 0.33 | -4.86 |
| IPI00006601 | Secretogranin-1 precursor | R.ADQTVLTEDEKKELENLAAM*DLELQK.I            | 5 | 4.21 | 0.19 | -2.44 |
| IPI00006601 | Secretogranin-1 precursor | R.ADQTVLTEDEKKELENLAAM*DLELQKIAEK.F        | 4 | 3.42 | 0.26 | -2.64 |
| IPI00006601 | Secretogranin-1 precursor | R.APRPQSEESWDEE.D                          | 2 | 3.63 | 0.40 | -3.39 |
| IPI00006601 | Secretogranin-1 precursor | R.APRPQSEESWDEED.K                         | 2 | 3.87 | 0.52 | -3.78 |
| IPI00006601 | Secretogranin-1 precursor | R.ASEEEPEYGEEIK.G                          | 2 | 4.35 | 0.34 | -3.92 |

|             |                           |                                        |   |      |      |       |
|-------------|---------------------------|----------------------------------------|---|------|------|-------|
| IPI00006601 | Secretogranin-1 precursor | R.ASEEEPEYGEIEKGYPGVQAPEDLEWER.Y       | 3 | 5.68 | 0.38 | -7.98 |
| IPI00006601 | Secretogranin-1 precursor | R.AYFM*SDTR.E                          | 2 | 2.24 | 0.19 | -1.20 |
| IPI00006601 | Secretogranin-1 precursor | R.AYFM*SDTREE.K                        | 2 | 3.30 | 0.45 | -3.40 |
| IPI00006601 | Secretogranin-1 precursor | R.AYFM*SDTREEK.R                       | 2 | 2.68 | 0.18 | -3.03 |
| IPI00006601 | Secretogranin-1 precursor | R.CIEVLSNALSK.S                        | 1 | 3.50 | 0.40 | -2.75 |
| IPI00006601 | Secretogranin-1 precursor | R.CIEVLSNALSK.S                        | 2 | 5.07 | 0.45 | -5.01 |
| IPI00006601 | Secretogranin-1 precursor | R.CIEVLSNALSK.S                        | 3 | 2.82 | 0.12 | -2.94 |
| IPI00006601 | Secretogranin-1 precursor | R.DPADASEAHSSSR.G                      | 2 | 4.67 | 0.62 | -3.44 |
| IPI00006601 | Secretogranin-1 precursor | R.DPADASEAHSSSR.G                      | 3 | 2.98 | 0.46 | -1.05 |
| IPI00006601 | Secretogranin-1 precursor | R.DPADASEAHSSSRGEAGAPGEEDIQGPTK.A      | 2 | 4.49 | 0.49 | -3.41 |
| IPI00006601 | Secretogranin-1 precursor | R.DPADASEAHSSSRGEAGAPGEEDIQGPTK.A      | 3 | 6.54 | 0.57 | -4.11 |
| IPI00006601 | Secretogranin-1 precursor | R.DPADASEAHSSSRGEAGAPGEEDIQGPTK.A      | 4 | 4.13 | 0.37 | -2.20 |
| IPI00006601 | Secretogranin-1 precursor | R.DPADASEAHSSSRGEAGAPGEEDIQGPTKADTEK.W | 3 | 8.25 | 0.56 | -2.76 |
| IPI00006601 | Secretogranin-1 precursor | R.DPADASEAHSSSRGEAGAPGEEDIQGPTKADTEK.W | 4 | 5.38 | 0.50 | -2.35 |
| IPI00006601 | Secretogranin-1 precursor | R.DPADASEAHSSSRGEAGAPGEEDIQGPTKADTEK.W | 5 | 2.81 | 0.40 | -2.54 |
| IPI00006601 | Secretogranin-1 precursor | R.EKSSQESGEEAGSQENHPQE.S               | 3 | 4.50 | 0.55 | -2.46 |
| IPI00006601 | Secretogranin-1 precursor | R.EKSSQESGEEAGSQENHPQESK.G             | 2 | 5.08 | 0.58 | -4.40 |
| IPI00006601 | Secretogranin-1 precursor | R.EKSSQESGEEAGSQENHPQESK.G             | 3 | 4.88 | 0.55 | -3.59 |
| IPI00006601 | Secretogranin-1 precursor | R.EKSSQESGEEAGSQENHPQESK.G             | 4 | 3.75 | 0.37 | -3.80 |
| IPI00006601 | Secretogranin-1 precursor | R.EKSSQESGEEAGSQENHPQESKQQPR.S         | 4 | 3.43 | 0.41 | -1.62 |
| IPI00006601 | Secretogranin-1 precursor | R.ERADEPQWSLYPSDSQVSEEVK.T             | 2 | 5.86 | 0.59 | -3.57 |
| IPI00006601 | Secretogranin-1 precursor | R.ERADEPQWSLYPSDSQVSEEVK.T             | 3 | 6.88 | 0.56 | -3.63 |
| IPI00006601 | Secretogranin-1 precursor | R.ERADEPQWSLYPSDSQVSEEVK.T             | 2 | 4.68 | 0.53 | -3.71 |
| IPI00006601 | Secretogranin-1 precursor | R.ERADEPQWSLYPSDSQVSEEVK.T             | 3 | 5.58 | 0.48 | -2.50 |
| IPI00006601 | Secretogranin-1 precursor | R.FLGEGHHR.V                           | 1 | 1.70 | 0.09 | -4.26 |
| IPI00006601 | Secretogranin-1 precursor | R.FLGEGHHR.V                           | 2 | 2.40 | 0.24 | -2.38 |
| IPI00006601 | Secretogranin-1 precursor | R.FQDKQYSSHHT.A                        | 2 | 3.79 | 0.28 | -3.80 |
| IPI00006601 | Secretogranin-1 precursor | R.FQDKQYSSHHTA.E                       | 2 | 4.21 | 0.40 | -3.72 |
| IPI00006601 | Secretogranin-1 precursor | R.FQDKQYSSHHTA.E.K                     | 2 | 3.99 | 0.40 | -3.94 |
| IPI00006601 | Secretogranin-1 precursor | R.GEAGAPGEEDIQGPTK.A                   | 1 | 3.46 | 0.37 | -4.04 |
| IPI00006601 | Secretogranin-1 precursor | R.GEAGAPGEEDIQGPTK.A                   | 2 | 4.62 | 0.41 | -3.60 |
| IPI00006601 | Secretogranin-1 precursor | R.GEAGAPGEEDIQGPTK.A                   | 3 | 3.49 | 0.32 | -1.94 |
| IPI00006601 | Secretogranin-1 precursor | R.GEAGAPGEEDIQGPTKA.D                  | 2 | 4.12 | 0.42 | -4.69 |
| IPI00006601 | Secretogranin-1 precursor | R.GEAGAPGEEDIQGPTKADTE.K               | 2 | 3.51 | 0.48 | -4.04 |
| IPI00006601 | Secretogranin-1 precursor | R.GEAGAPGEEDIQGPTKADTEK.W              | 2 | 4.96 | 0.52 | -3.58 |
| IPI00006601 | Secretogranin-1 precursor | R.GEAGAPGEEDIQGPTKADTEK.W              | 3 | 1.62 | 0.20 | -2.24 |
| IPI00006601 | Secretogranin-1 precursor | R.GEDSSEEKHLLEEPGETQNAFLNER.K          | 2 | 4.71 | 0.53 | -3.26 |
| IPI00006601 | Secretogranin-1 precursor | R.GEDSSEEKHLLEEPGETQNAFLNER.K          | 3 | 6.62 | 0.55 | -2.34 |
| IPI00006601 | Secretogranin-1 precursor | R.GEDSSEEKHLLEEPGETQNAFLNER.K          | 4 | 3.92 | 0.41 | -2.81 |
| IPI00006601 | Secretogranin-1 precursor | R.KDVKDKETTENENTKFEV.R                 | 3 | 3.97 | 0.28 | -3.07 |
| IPI00006601 | Secretogranin-1 precursor | R.KQASAIKKEELV.A                       | 1 | 3.01 | 0.26 | -5.37 |
| IPI00006601 | Secretogranin-1 precursor | R.KQASAIKKEELV.A                       | 2 | 3.47 | 0.30 | -3.60 |



|             |                           |                                          |   |      |      |       |
|-------------|---------------------------|------------------------------------------|---|------|------|-------|
| IPI00006601 | Secretogranin-1 precursor | R.KQASAIKKEELVA.R                        | 2 | 3.63 | 0.45 | -4.46 |
| IPI00006601 | Secretogranin-1 precursor | R.KQASAIKKEELVAR.S                       | 2 | 5.16 | 0.39 | -4.06 |
| IPI00006601 | Secretogranin-1 precursor | R.KQASAIKKEELVAR.S                       | 3 | 3.22 | 0.29 | -2.77 |
| IPI00006601 | Secretogranin-1 precursor | R.LLRDPADASEAHESSR.G                     | 2 | 4.54 | 0.45 | -5.12 |
| IPI00006601 | Secretogranin-1 precursor | R.LLRDPADASEAHESSR.G                     | 3 | 5.11 | 0.50 | -3.98 |
| IPI00006601 | Secretogranin-1 precursor | R.LLRDPADASEAHESSR.G                     | 4 | 3.74 | 0.39 | -1.77 |
| IPI00006601 | Secretogranin-1 precursor | R.LLRDPADASEAHESSRGEAGAPGEEDIQGTK.A      | 3 | 5.00 | 0.57 | -4.33 |
| IPI00006601 | Secretogranin-1 precursor | R.LLRDPADASEAHESSRGEAGAPGEEDIQGTK.A      | 4 | 5.84 | 0.48 | -3.68 |
| IPI00006601 | Secretogranin-1 precursor | R.LLRDPADASEAHESSRGEAGAPGEEDIQGTKADTEK.W | 4 | 6.22 | 0.56 | -3.54 |
| IPI00006601 | Secretogranin-1 precursor | R.NYLNYGEEGAPGK.W                        | 1 | 2.88 | 0.35 | -3.25 |
| IPI00006601 | Secretogranin-1 precursor | R.NYLNYGEEGAPGK.W                        | 2 | 4.29 | 0.47 | -3.54 |
| IPI00006601 | Secretogranin-1 precursor | R.NYLNYGEEGAPGKWQQQGLQDTK.E              | 3 | 3.57 | 0.35 | -2.19 |
| IPI00006601 | Secretogranin-1 precursor | R.NYPSLELDK.M                            | 1 | 2.22 | 0.11 | -4.24 |
| IPI00006601 | Secretogranin-1 precursor | R.NYPSLELDKM*AHGYGEESEER.G               | 2 | 4.87 | 0.60 | -3.45 |
| IPI00006601 | Secretogranin-1 precursor | R.NYPSLELDKM*AHGYGEESEER.G               | 3 | 3.39 | 0.56 | -3.13 |
| IPI00006601 | Secretogranin-1 precursor | R.NYPSLELDKM*AHGYGEESEERGLEPGK.G         | 3 | 4.52 | 0.44 | -2.88 |
| IPI00006601 | Secretogranin-1 precursor | R.NYPSLELDKM*AHGYGEESEERGLEPGK.G         | 4 | 2.93 | 0.36 | -3.01 |
| IPI00006601 | Secretogranin-1 precursor | R.NYPSLELDKM*AHGYGEESEERGLEPGKGR.H       | 3 | 3.95 | 0.43 | -0.22 |
| IPI00006601 | Secretogranin-1 precursor | R.NYPSLELDKM*AHGYGEESEERGLEPGKGR.H       | 4 | 2.75 | 0.36 | -2.46 |
| IPI00006601 | Secretogranin-1 precursor | R.SQEESEEGEEDATSEVDKR.R                  | 3 | 3.22 | 0.21 | -3.59 |
| IPI00006601 | Secretogranin-1 precursor | R.SQEESEEGEEDATSEVDKRR.T                 | 2 | 4.53 | 0.48 | -2.17 |
| IPI00006601 | Secretogranin-1 precursor | R.SQEESEEGEEDATSEVDKRR.T                 | 3 | 3.29 | 0.32 | -2.40 |
| IPI00006601 | Secretogranin-1 precursor | R.SQEESEEGEEDATSEVDKRR.T                 | 4 | 4.09 | 0.38 | -1.75 |
| IPI00006601 | Secretogranin-1 precursor | R.SSQGGSLPSEEK.G                         | 1 | 2.14 | 0.09 | -3.35 |
| IPI00006601 | Secretogranin-1 precursor | R.SSQGGSLPSEEK.G                         | 2 | 3.96 | 0.33 | -3.27 |
| IPI00006601 | Secretogranin-1 precursor | R.SSQGGSLPSEEKGHPQ.E                     | 2 | 3.81 | 0.45 | -2.91 |
| IPI00006601 | Secretogranin-1 precursor | R.SSQGGSLPSEEKGHPQEEES.E                 | 2 | 3.45 | 0.46 | -3.34 |
| IPI00006601 | Secretogranin-1 precursor | R.SSQGGSLPSEEKGHPQEESESN.V               | 2 | 3.53 | 0.43 | -4.22 |
| IPI00006601 | Secretogranin-1 precursor | R.SSQGGSLPSEEKGHPQEESESNVSM*A.S          | 3 | 3.52 | 0.42 | -3.23 |
| IPI00006601 | Secretogranin-1 precursor | R.SSQGGSLPSEEKGHPQEESESNVSM*ASL.G.E      | 3 | 3.67 | 0.42 | -1.78 |
| IPI00006601 | Secretogranin-1 precursor | R.SSQGGSLPSEEKGHPQEESESNVSM*ASLGE.K      | 3 | 4.32 | 0.55 | -5.24 |
| IPI00006601 | Secretogranin-1 precursor | R.SSQGGSLPSEEKGHPQEESESNVSM*ASLGEK.R     | 3 | 4.26 | 0.39 | -2.75 |
| IPI00006601 | Secretogranin-1 precursor | R.SSQGGSLPSEEKGHPQEESESNVSM*ASLGEK.R.D   | 4 | 3.41 | 0.16 | -3.92 |
| IPI00006601 | Secretogranin-1 precursor | R.VAQLDQLLHY.R                           | 2 | 3.85 | 0.34 | -3.22 |
| IPI00006601 | Secretogranin-1 precursor | R.VAQLDQLLHYR.K                          | 2 | 3.30 | 0.43 | -3.54 |
| IPI00006601 | Secretogranin-1 precursor | R.VAQLDQLLHYR.K                          | 3 | 3.20 | 0.32 | -2.85 |
| IPI00006601 | Secretogranin-1 precursor | R.VAQLDQLLHYR.K                          | 2 | 3.74 | 0.39 | -2.73 |
| IPI00006601 | Secretogranin-1 precursor | S.DSQVSEEVK.T                            | 2 | 3.03 | 0.16 | -2.29 |
| IPI00006601 | Secretogranin-1 precursor | S.DSQVSEEVKTR.H                          | 2 | 3.23 | 0.28 | -2.37 |
| IPI00006601 | Secretogranin-1 precursor | S.EEPVSTHQEAENEKDR.A                     | 2 | 2.91 | 0.44 | -3.53 |
| IPI00006601 | Secretogranin-1 precursor | S.SQESGEEAGSQENHPQESK.G                  | 2 | 4.50 | 0.58 | -3.88 |
| IPI00006601 | Secretogranin-1 precursor | W.SLYPSDSQVSEEVK.T                       | 2 | 4.04 | 0.49 | -4.37 |

|             |                                                                |                                        |   |      |      |       |
|-------------|----------------------------------------------------------------|----------------------------------------|---|------|------|-------|
| IPI00006601 | Secretogranin-1 precursor                                      | W.SLYPSDSQVSEEVKTR.H                   | 2 | 4.28 | 0.50 | -3.74 |
| IPI00006601 | Secretogranin-1 precursor                                      | Y.DSEEPVSTHQEAENEKDR.A                 | 2 | 4.35 | 0.45 | -3.30 |
| IPI00006601 | Secretogranin-1 precursor                                      | Y.LNYGEEGAPGK.W                        | 2 | 3.94 | 0.40 | -2.94 |
| IPI00006601 | Secretogranin-1 precursor                                      | Y.PSDSQVSEEVK.T                        | 2 | 4.53 | 0.43 | -2.32 |
| IPI00006601 | Secretogranin-1 precursor                                      | Y.PSDSQVSEEVKTR.H                      | 3 | 3.68 | 0.35 | -0.45 |
| IPI00006608 | Isoform APP770 of Amyloid beta A4 protein precursor (Fragment) | A.DRGLTTRPGSGLTNIKTEEISEVK.M           | 3 | 3.64 | 0.29 | -3.89 |
| IPI00006608 | Isoform APP770 of Amyloid beta A4 protein precursor (Fragment) | A.LEVPTDGNAGLLAEPQIAM*FCGR.L           | 2 | 6.63 | 0.58 | -5.73 |
| IPI00006608 | Isoform APP770 of Amyloid beta A4 protein precursor (Fragment) | A.LEVPTDGNAGLLAEPQIAM*FCGR.L           | 3 | 6.88 | 0.51 | -5.99 |
| IPI00006608 | Isoform APP770 of Amyloid beta A4 protein precursor (Fragment) | A.VIQHFQEKVESLEQEAAANER.Q              | 3 | 5.74 | 0.45 | -4.38 |
| IPI00006608 | Isoform APP770 of Amyloid beta A4 protein precursor (Fragment) | E.FVSDALLVPDK.C                        | 2 | 3.16 | 0.20 | -5.01 |
| IPI00006608 | Isoform APP770 of Amyloid beta A4 protein precursor (Fragment) | H.SFGADSV PANTENEVEPVDARPAADR.G        | 3 | 3.70 | 0.37 | -4.23 |
| IPI00006608 | Isoform APP770 of Amyloid beta A4 protein precursor (Fragment) | K.AVIQHFQEK.V                          | 1 | 2.34 | 0.16 | -4.69 |
| IPI00006608 | Isoform APP770 of Amyloid beta A4 protein precursor (Fragment) | K.AVIQHFQEKVESLEQEAAANER.Q             | 2 | 6.49 | 0.58 | -5.52 |
| IPI00006608 | Isoform APP770 of Amyloid beta A4 protein precursor (Fragment) | K.AVIQHFQEKVESLEQEAAANER.Q             | 3 | 6.15 | 0.56 | -4.45 |
| IPI00006608 | Isoform APP770 of Amyloid beta A4 protein precursor (Fragment) | K.AVIQHFQEKVESLEQEAAANER.Q             | 4 | 3.75 | 0.21 | -4.67 |
| IPI00006608 | Isoform APP770 of Amyloid beta A4 protein precursor (Fragment) | K.CAPFFYGGCGGNR.N                      | 2 | 3.95 | 0.42 | -2.68 |
| IPI00006608 | Isoform APP770 of Amyloid beta A4 protein precursor (Fragment) | K.EGILQYCQEVYPELQITNVVEANQPVTIQNWCK.R  | 3 | 4.59 | 0.56 | -3.42 |
| IPI00006608 | Isoform APP770 of Amyloid beta A4 protein precursor (Fragment) | K.EGILQYCQEVYPELQITNVVEANQPVTIQNWCKR.G | 3 | 6.48 | 0.55 | -3.71 |
| IPI00006608 | Isoform APP770 of Amyloid beta A4 protein precursor (Fragment) | K.EGILQYCQEVYPELQITNVVEANQPVTIQNWCKR.G | 4 | 5.24 | 0.50 | -4.31 |
| IPI00006608 | Isoform APP770 of Amyloid beta A4 protein precursor (Fragment) | K.EQNYSDDLANM*ISEPR.I                  | 2 | 4.98 | 0.48 | -4.16 |
| IPI00006608 | Isoform APP770 of Amyloid beta A4 protein precursor (Fragment) | K.EQNYSDDLANM*ISEPR.I                  | 3 | 4.02 | 0.38 | -3.10 |
| IPI00006608 | Isoform APP770 of Amyloid beta A4 protein precursor (Fragment) | K.KAVIQHFQEK.V                         | 2 | 3.27 | 0.19 | -3.14 |
| IPI00006608 | Isoform APP770 of Amyloid beta A4 protein precursor (Fragment) | K.LVFFAEDVGSNK.G                       | 2 | 4.29 | 0.50 | -4.95 |

|             |                                                                |                                             |   |      |      |       |
|-------------|----------------------------------------------------------------|---------------------------------------------|---|------|------|-------|
| IPI00006608 | Isoform APP770 of Amyloid beta A4 protein precursor (Fragment) | K.M*DAEFRHDSGY.E                            | 2 | 3.24 | 0.47 | -2.39 |
| IPI00006608 | Isoform APP770 of Amyloid beta A4 protein precursor (Fragment) | K.M*DAEFRHDSGYE.V                           | 2 | 3.69 | 0.42 | -3.55 |
| IPI00006608 | Isoform APP770 of Amyloid beta A4 protein precursor (Fragment) | K.M*DAEFRHDSGYEVHHQ.K                       | 3 | 4.11 | 0.49 | -2.49 |
| IPI00006608 | Isoform APP770 of Amyloid beta A4 protein precursor (Fragment) | K.STNLHDYGM*LLPCGIDKFR.G                    | 3 | 3.05 | 0.28 | -4.25 |
| IPI00006608 | Isoform APP770 of Amyloid beta A4 protein precursor (Fragment) | K.STNLHDYGM*LLPCGIDKFR.G                    | 4 | 3.92 | 0.35 | -4.44 |
| IPI00006608 | Isoform APP770 of Amyloid beta A4 protein precursor (Fragment) | K.TEEISEVKM*.D                              | 1 | 2.23 | 0.25 | -4.38 |
| IPI00006608 | Isoform APP770 of Amyloid beta A4 protein precursor (Fragment) | K.TEEISEVKM*.D                              | 2 | 3.79 | 0.39 | -2.76 |
| IPI00006608 | Isoform APP770 of Amyloid beta A4 protein precursor (Fragment) | K.TEEISEVKM*DAE.F                           | 2 | 4.13 | 0.38 | -3.05 |
| IPI00006608 | Isoform APP770 of Amyloid beta A4 protein precursor (Fragment) | K.TEEISEVKM*DAEFR.H                         | 2 | 3.94 | 0.51 | -3.48 |
| IPI00006608 | Isoform APP770 of Amyloid beta A4 protein precursor (Fragment) | K.TEEISEVKM*DAEFR.H                         | 3 | 2.65 | 0.24 | -2.05 |
| IPI00006608 | Isoform APP770 of Amyloid beta A4 protein precursor (Fragment) | K.THPHFVIPYR.C                              | 1 | 2.39 | 0.19 | -5.31 |
| IPI00006608 | Isoform APP770 of Amyloid beta A4 protein precursor (Fragment) | K.THPHFVIPYR.C                              | 2 | 2.97 | 0.38 | -4.05 |
| IPI00006608 | Isoform APP770 of Amyloid beta A4 protein precursor (Fragment) | K.THPHFVIPYR.C                              | 3 | 3.46 | 0.26 | -4.52 |
| IPI00006608 | Isoform APP770 of Amyloid beta A4 protein precursor (Fragment) | K.TTVLLPVNGEFLDDLQPWHSFGADSVANTENEVEPVDAR.P | 3 | 4.70 | 0.49 | -5.12 |
| IPI00006608 | Isoform APP770 of Amyloid beta A4 protein precursor (Fragment) | K.VESLEQEAAANER.Q                           | 1 | 2.84 | 0.36 | -1.90 |
| IPI00006608 | Isoform APP770 of Amyloid beta A4 protein precursor (Fragment) | K.VESLEQEAAANER.Q                           | 2 | 4.26 | 0.35 | -3.68 |
| IPI00006608 | Isoform APP770 of Amyloid beta A4 protein precursor (Fragment) | K.VESLEQEAAANER.Q                           | 3 | 3.99 | 0.08 | -2.10 |
| IPI00006608 | Isoform APP770 of Amyloid beta A4 protein precursor (Fragment) | K.WSDPSGTK.T                                | 1 | 1.76 | 0.30 | -3.67 |
| IPI00006608 | Isoform APP770 of Amyloid beta A4 protein precursor (Fragment) | K.WSDPSGTK.T                                | 2 | 2.28 | 0.07 | -1.22 |
| IPI00006608 | Isoform APP770 of Amyloid beta A4 protein precursor (Fragment) | K.YLETPGDENEHAHFQK.A                        | 2 | 4.13 | 0.52 | -4.52 |
| IPI00006608 | Isoform APP770 of Amyloid beta A4 protein precursor (Fragment) | K.YLETPGDENEHAHFQK.A                        | 3 | 2.74 | 0.27 | -3.36 |

|             |                                                                |                                           |   |      |      |       |
|-------------|----------------------------------------------------------------|-------------------------------------------|---|------|------|-------|
| IPI00006608 | Isoform APP770 of Amyloid beta A4 protein precursor (Fragment) | K.YLETPGDENEHAHFQK.A                      | 4 | 2.72 | 0.27 | -3.30 |
| IPI00006608 | Isoform APP770 of Amyloid beta A4 protein precursor (Fragment) | L.EVPTDGNAGLLAEPQIAM*FCGR.L               | 2 | 4.20 | 0.42 | -5.27 |
| IPI00006608 | Isoform APP770 of Amyloid beta A4 protein precursor (Fragment) | L.EVPTDGNAGLLAEPQIAM*FCGR.L               | 3 | 4.50 | 0.45 | -4.18 |
| IPI00006608 | Isoform APP770 of Amyloid beta A4 protein precursor (Fragment) | L.YNVPAVAEEIQDEVDELLQK.E                  | 2 | 5.64 | 0.46 | -5.51 |
| IPI00006608 | Isoform APP770 of Amyloid beta A4 protein precursor (Fragment) | N.YITALQAVPPRPR.H                         | 2 | 3.04 | 0.23 | -1.24 |
| IPI00006608 | Isoform APP770 of Amyloid beta A4 protein precursor (Fragment) | P.VNGEFLDDLPWHSFGADSVANTENEVEPVDARPAADR.G | 4 | 4.54 | 0.29 | -3.93 |
| IPI00006608 | Isoform APP770 of Amyloid beta A4 protein precursor (Fragment) | R.CLVGEFVSDALLVPDK.C                      | 2 | 5.61 | 0.47 | -8.27 |
| IPI00006608 | Isoform APP770 of Amyloid beta A4 protein precursor (Fragment) | R.CLVGEFVSDALLVPDK.C                      | 3 | 3.54 | 0.29 | -6.01 |
| IPI00006608 | Isoform APP770 of Amyloid beta A4 protein precursor (Fragment) | R.CLVGEFVSDALLVPDKCK.F                    | 2 | 4.76 | 0.46 | -2.83 |
| IPI00006608 | Isoform APP770 of Amyloid beta A4 protein precursor (Fragment) | R.CLVGEFVSDALLVPDKCK.F                    | 3 | 5.06 | 0.44 | -4.86 |
| IPI00006608 | Isoform APP770 of Amyloid beta A4 protein precursor (Fragment) | R.EVCSEQAETGPCR.A                         | 2 | 3.67 | 0.41 | -2.36 |
| IPI00006608 | Isoform APP770 of Amyloid beta A4 protein precursor (Fragment) | R.EWEEAER.Q                               | 2 | 1.41 | 0.07 | -2.94 |
| IPI00006608 | Isoform APP770 of Amyloid beta A4 protein precursor (Fragment) | R.GLTTRPGSGLTNIK.T                        | 2 | 3.60 | 0.22 | -2.71 |
| IPI00006608 | Isoform APP770 of Amyloid beta A4 protein precursor (Fragment) | R.GLTTRPGSGLTNIKTEE.I                     | 2 | 3.43 | 0.32 | -3.10 |
| IPI00006608 | Isoform APP770 of Amyloid beta A4 protein precursor (Fragment) | R.GLTTRPGSGLTNIKTEEISE.V                  | 2 | 3.04 | 0.39 | -2.07 |
| IPI00006608 | Isoform APP770 of Amyloid beta A4 protein precursor (Fragment) | R.GLTTRPGSGLTNIKTEEISEV.K                 | 2 | 3.48 | 0.45 | -4.64 |
| IPI00006608 | Isoform APP770 of Amyloid beta A4 protein precursor (Fragment) | R.GLTTRPGSGLTNIKTEEISEVK.M                | 2 | 4.94 | 0.50 | -3.58 |
| IPI00006608 | Isoform APP770 of Amyloid beta A4 protein precursor (Fragment) | R.GLTTRPGSGLTNIKTEEISEVK.M                | 3 | 5.27 | 0.49 | -4.07 |
| IPI00006608 | Isoform APP770 of Amyloid beta A4 protein precursor (Fragment) | R.GLTTRPGSGLTNIKTEEISEVK.M                | 4 | 2.51 | 0.26 | -2.00 |
| IPI00006608 | Isoform APP770 of Amyloid beta A4 protein precursor (Fragment) | R.GLTTRPGSGLTNIKTEEISEVKM*.D              | 2 | 4.58 | 0.42 | -4.34 |
| IPI00006608 | Isoform APP770 of Amyloid beta A4 protein precursor (Fragment) | R.GLTTRPGSGLTNIKTEEISEVKM*.D              | 3 | 5.13 | 0.45 | -4.10 |

|             |                                                                |                                         |   |      |      |       |
|-------------|----------------------------------------------------------------|-----------------------------------------|---|------|------|-------|
| IPI00006608 | Isoform APP770 of Amyloid beta A4 protein precursor (Fragment) | R.GLTTRPGSGLTNIKTEEISEVKM*DAE.F         | 3 | 3.78 | 0.38 | -4.95 |
| IPI00006608 | Isoform APP770 of Amyloid beta A4 protein precursor (Fragment) | R.GLTTRPGSGLTNIKTEEISEVKM*DAEFR.H       | 4 | 3.13 | 0.12 | -0.93 |
| IPI00006608 | Isoform APP770 of Amyloid beta A4 protein precursor (Fragment) | R.ISYGN DALM*PSLTETK.T                  | 2 | 5.65 | 0.48 | -3.69 |
| IPI00006608 | Isoform APP770 of Amyloid beta A4 protein precursor (Fragment) | R.ISYGN DALM*PSLTETK.T                  | 3 | 2.38 | 0.06 | -2.09 |
| IPI00006608 | Isoform APP770 of Amyloid beta A4 protein precursor (Fragment) | R.LALENYITALQAVPPRPR.H                  | 2 | 3.07 | 0.31 | -3.36 |
| IPI00006608 | Isoform APP770 of Amyloid beta A4 protein precursor (Fragment) | R.LALENYITALQAVPPRPR.H                  | 3 | 3.55 | 0.51 | -5.03 |
| IPI00006608 | Isoform APP770 of Amyloid beta A4 protein precursor (Fragment) | R.LALENYITALQAVPPRPR.H                  | 4 | 4.45 | 0.43 | -1.40 |
| IPI00006608 | Isoform APP770 of Amyloid beta A4 protein precursor (Fragment) | R.LNM*HM*NVQNGK.W                       | 2 | 3.49 | 0.35 | -3.59 |
| IPI00006608 | Isoform APP770 of Amyloid beta A4 protein precursor (Fragment) | R.LNM*HM*NVQNGK.W                       | 3 | 2.96 | 0.26 | -3.51 |
| IPI00006608 | Isoform APP770 of Amyloid beta A4 protein precursor (Fragment) | R.LNM*HM*NVQNGKWSDPSGTK.T               | 3 | 4.53 | 0.47 | -1.49 |
| IPI00006608 | Isoform APP770 of Amyloid beta A4 protein precursor (Fragment) | R.LNM*HM*NVQNGKWSDPSGTK.T               | 4 | 3.88 | 0.34 | -0.28 |
| IPI00006608 | Isoform APP770 of Amyloid beta A4 protein precursor (Fragment) | R.RLALENYITALQAVPPRPR.H                 | 2 | 3.34 | 0.44 | -4.43 |
| IPI00006608 | Isoform APP770 of Amyloid beta A4 protein precursor (Fragment) | R.RLALENYITALQAVPPRPR.H                 | 3 | 5.30 | 0.51 | -4.63 |
| IPI00006608 | Isoform APP770 of Amyloid beta A4 protein precursor (Fragment) | R.RLALENYITALQAVPPRPR.H                 | 4 | 3.96 | 0.43 | -4.01 |
| IPI00006608 | Isoform APP770 of Amyloid beta A4 protein precursor (Fragment) | R.SQVM*THLR.V                           | 2 | 2.42 | 0.09 | -2.37 |
| IPI00006608 | Isoform APP770 of Amyloid beta A4 protein precursor (Fragment) | R.VEAM*LNDR.R                           | 2 | 2.96 | 0.32 | -3.35 |
| IPI00006608 | Isoform APP770 of Amyloid beta A4 protein precursor (Fragment) | R.WYFDVTEGK.C                           | 2 | 2.93 | 0.29 | -2.98 |
| IPI00006608 | Isoform APP770 of Amyloid beta A4 protein precursor (Fragment) | S.LDDLQPWHSFGADSV PANTENEVEPVDARPAADR.G | 3 | 4.57 | 0.43 | -3.02 |
| IPI00006608 | Isoform APP770 of Amyloid beta A4 protein precursor (Fragment) | S.LDDLQPWHSFGADSV PANTENEVEPVDARPAADR.G | 4 | 4.46 | 0.36 | -2.85 |
| IPI00006608 | Isoform APP770 of Amyloid beta A4 protein precursor (Fragment) | V.GEFVSDALLVPDK.C                       | 2 | 3.46 | 0.31 | -3.15 |
| IPI00006608 | Isoform APP770 of Amyloid beta A4 protein precursor (Fragment) | V.SDALLVPDK.C                           | 2 | 2.91 | 0.32 | 1.82  |

|             |                                                                |                                |   |      |      |       |
|-------------|----------------------------------------------------------------|--------------------------------|---|------|------|-------|
| IPI00006608 | Isoform APP770 of Amyloid beta A4 protein precursor (Fragment) | W.HSFGADSVANTENEVEPVDARPAADR.G | 3 | 4.50 | 0.38 | -4.47 |
| IPI00006644 | Isoform 2 of Plexin-B1 precursor                               | R.DLTFDGTFEHLYVM*TQSTLLK.V     | 3 | 4.86 | 0.33 | -4.66 |
| IPI00006644 | Isoform 2 of Plexin-B1 precursor                               | R.DPYCGWCVLLGR.C               | 2 | 3.95 | 0.47 | -3.48 |
| IPI00006644 | Isoform 2 of Plexin-B1 precursor                               | R.FGAVVIK.T                    | 2 | 2.63 | 0.19 | -3.32 |
| IPI00006644 | Isoform 2 of Plexin-B1 precursor                               | R.GVGGGIPPITTR.A               | 2 | 3.12 | 0.37 | -1.98 |
| IPI00006644 | Isoform 2 of Plexin-B1 precursor                               | R.LSEYSHHFVSAFAR.G             | 3 | 3.29 | 0.29 | -3.75 |
| IPI00006644 | Isoform 2 of Plexin-B1 precursor                               | R.VYLGPGSDGHPYSTQSIQQGSAVSR.D  | 3 | 5.93 | 0.42 | -3.32 |
| IPI00006644 | Isoform 2 of Plexin-B1 precursor                               | Y.STQSIQQGSAVSR.D              | 2 | 3.90 | 0.43 | -2.39 |
| IPI00006657 | Protein FAM20B precursor                                       | K.SFGNPSLDER.S                 | 2 | 2.87 | 0.23 | -0.88 |
| IPI00006657 | Protein FAM20B precursor                                       | R.LLDIIDTAVFDYLIGNADR.H        | 2 | 5.51 | 0.52 | -2.89 |
| IPI00006657 | Protein FAM20B precursor                                       | R.LLDIIDTAVFDYLIGNADR.H        | 3 | 5.02 | 0.40 | -2.18 |
| IPI00006657 | Protein FAM20B precursor                                       | R.LLSVLATVK.Q                  | 2 | 2.69 | 0.23 | -1.39 |
| IPI00006657 | Protein FAM20B precursor                                       | R.SILAPLYQCCIR.V               | 2 | 3.12 | 0.36 | -2.73 |
| IPI00006662 | Apolipoprotein D precursor                                     | K.CPNPPVQENFDVNK.Y             | 1 | 2.60 | 0.19 |       |
| IPI00006662 | Apolipoprotein D precursor                                     | K.CPNPPVQENFDVNK.Y             | 2 | 4.48 | 0.36 |       |
| IPI00006662 | Apolipoprotein D precursor                                     | K.CPNPPVQENFDVNK.Y             | 3 | 5.21 | 0.24 |       |
| IPI00006662 | Apolipoprotein D precursor                                     | K.CPNPPVQENFDVNKYLGR.W         | 2 | 5.22 | 0.46 |       |
| IPI00006662 | Apolipoprotein D precursor                                     | K.CPNPPVQENFDVNKYLGR.W         | 3 | 2.06 | 0.10 | -0.72 |
| IPI00006662 | Apolipoprotein D precursor                                     | K.IKVLNQLR.A                   | 1 | 2.67 | 0.07 |       |
| IPI00006662 | Apolipoprotein D precursor                                     | K.IKVLNQLR.A                   | 2 | 3.09 | 0.07 |       |
| IPI00006662 | Apolipoprotein D precursor                                     | K.IPTTFENGR.C                  | 2 | 2.30 | 0.15 |       |
| IPI00006662 | Apolipoprotein D precursor                                     | K.KM*TVTDQVNCPL.L              | 1 | 2.10 | 0.19 |       |
| IPI00006662 | Apolipoprotein D precursor                                     | K.KM*TVTDQVNCPL.L              | 2 | 3.93 | 0.36 |       |
| IPI00006662 | Apolipoprotein D precursor                                     | K.KM*TVTDQVNCPL.L              | 3 | 3.42 | 0.09 |       |
| IPI00006662 | Apolipoprotein D precursor                                     | K.KM*TVTDQVNCPLS.-             | 2 | 3.51 | 0.20 |       |
| IPI00006662 | Apolipoprotein D precursor                                     | K.KMTVTDQVNCPL.L               | 1 | 3.37 | 0.22 |       |
| IPI00006662 | Apolipoprotein D precursor                                     | K.KMTVTDQVNCPL.L               | 2 | 3.97 | 0.32 |       |
| IPI00006662 | Apolipoprotein D precursor                                     | K.M*TVTDQVNCPL.L               | 1 | 2.18 | 0.28 |       |
| IPI00006662 | Apolipoprotein D precursor                                     | K.M*TVTDQVNCPL.L               | 2 | 4.10 | 0.45 | -4.27 |
| IPI00006662 | Apolipoprotein D precursor                                     | K.M*TVTDQVNCPLS.-              | 2 | 4.25 | 0.43 |       |
| IPI00006662 | Apolipoprotein D precursor                                     | K.MTVTDQVNCPL.L                | 2 | 3.82 | 0.28 |       |
| IPI00006662 | Apolipoprotein D precursor                                     | K.MTVTDQVNCPLS.-               | 2 | 4.49 | 0.35 |       |
| IPI00006662 | Apolipoprotein D precursor                                     | K.NILTSNNIDVK.K                | 1 | 2.75 | 0.27 | -3.04 |
| IPI00006662 | Apolipoprotein D precursor                                     | K.NILTSNNIDVK.K                | 2 | 2.12 | 0.09 | -1.35 |
| IPI00006662 | Apolipoprotein D precursor                                     | K.NILTSNNIDVKK.M               | 2 | 2.95 | 0.24 | -3.91 |
| IPI00006662 | Apolipoprotein D precursor                                     | K.NILTSNNIDVKK.M               | 3 | 2.08 | 0.23 | -4.18 |
| IPI00006662 | Apolipoprotein D precursor                                     | N.PPVQENFDVNKYLGR.W            | 2 | 5.44 | 0.40 |       |
| IPI00006662 | Apolipoprotein D precursor                                     | R.CIQANYSLM*ENGG.I             | 2 | 4.06 | 0.38 |       |
| IPI00006662 | Apolipoprotein D precursor                                     | R.NPNLPPETVDSLK.N              | 2 | 2.92 | 0.21 | -4.77 |
| IPI00006662 | Apolipoprotein D precursor                                     | R.NPNLPPETVDSLKNILTSNNIDVK.K   | 2 | 2.80 | 0.12 |       |
| IPI00006662 | Apolipoprotein D precursor                                     | R.NPNLPPETVDSLKNILTSNNIDVK.K   | 3 | 2.36 | 0.18 | -2.49 |

|             |                                                |                                   |   |      |      |       |
|-------------|------------------------------------------------|-----------------------------------|---|------|------|-------|
| IPI00006662 | Apolipoprotein D precursor                     | R.NPNLPPETVDSLKNILTSNNIDVKK.M     | 2 | 4.77 | 0.36 |       |
| IPI00006662 | Apolipoprotein D precursor                     | R.NPNLPPETVDSLKNILTSNNIDVKK.M     | 4 | 2.39 | 0.10 | -3.08 |
| IPI00006662 | Apolipoprotein D precursor                     | R.WYEIEKIPTTFENGR.C               | 1 | 4.16 | 0.36 |       |
| IPI00006662 | Apolipoprotein D precursor                     | R.WYEIEKIPTTFENGR.C               | 2 | 4.92 | 0.34 |       |
| IPI00006662 | Apolipoprotein D precursor                     | R.WYEIEKIPTTFENGR.C               | 3 | 3.16 | 0.33 | -2.65 |
| IPI00006713 | Isoform 1 of DnaJ homolog subfamily C member 3 | K.ISTLYYQLGDHELSEVR.E             | 3 | 2.77 | 0.34 | -2.38 |
| IPI00006713 | Isoform 1 of DnaJ homolog subfamily C member 3 | K.LKNDNTEAFYK.I                   | 2 | 2.81 | 0.24 | -3.85 |
| IPI00006713 | Isoform 1 of DnaJ homolog subfamily C member 3 | K.LLAAGQLADALSQFHAAVDGDPDNYIAYR.R | 3 | 7.18 | 0.61 | -3.71 |
| IPI00006713 | Isoform 1 of DnaJ homolog subfamily C member 3 | K.M*DFTAAR.L                      | 2 | 2.30 | 0.18 | -3.61 |
| IPI00006746 | Ermin                                          | K.ISEELTDVDSPLPHYR.V              | 3 | 3.18 | 0.16 | -2.07 |
| IPI00006803 | Carbohydrate sulfotransferase 10               | K.FFIVRDPFER.L                    | 2 | 2.12 | 0.13 | -3.65 |
| IPI00006803 | Carbohydrate sulfotransferase 10               | K.ILFCQTPK.V                      | 2 | 2.32 | 0.06 | -1.75 |
| IPI00006803 | Carbohydrate sulfotransferase 10               | K.LFGYQKPDFLLN.-                  | 2 | 3.67 | 0.31 | -3.96 |
| IPI00006803 | Carbohydrate sulfotransferase 10               | R.GIQFEDFVR.Y                     | 1 | 1.67 | 0.10 | -4.35 |
| IPI00006803 | Carbohydrate sulfotransferase 10               | R.GIQFEDFVR.Y                     | 2 | 2.87 | 0.16 | -2.72 |
| IPI00006803 | Carbohydrate sulfotransferase 10               | R.LSSFSDAEIQKR.L                  | 2 | 3.04 | 0.38 | -2.73 |
| IPI00006803 | Carbohydrate sulfotransferase 10               | R.LSSFSDAEIQKR.L                  | 3 | 1.72 | 0.19 | -2.42 |
| IPI00006900 | Something about silencing protein 10           | K.TSAAACAVTDLSDSDFDEKAKLK.Y       | 2 | 2.70 | 0.10 | -7.35 |
| IPI00006967 | Protocadherin-9 precursor                      | K.AVTLSILNDNDFVLDPYSGVIK.S        | 3 | 3.57 | 0.20 | -2.85 |
| IPI00006967 | Protocadherin-9 precursor                      | K.AVYDNQYLLETSSLLDYEGTKEFSFK.I    | 3 | 3.40 | 0.36 | -3.65 |
| IPI00006967 | Protocadherin-9 precursor                      | K.DLNISHINAATGTSASLVYR.L          | 3 | 3.09 | 0.29 | -2.26 |
| IPI00006967 | Protocadherin-9 precursor                      | K.IALITVSDKDTDVNGK.V              | 2 | 4.30 | 0.47 | -2.57 |
| IPI00006967 | Protocadherin-9 precursor                      | K.IALITVSDKDTDVNGK.V              | 3 | 3.04 | 0.27 | -1.95 |
| IPI00006967 | Protocadherin-9 precursor                      | K.TGVLTASR.V                      | 2 | 2.53 | 0.17 | -3.25 |
| IPI00006967 | Protocadherin-9 precursor                      | K.VSSSTGEIFTTSNR.I                | 2 | 4.09 | 0.39 | -3.17 |
| IPI00006967 | Protocadherin-9 precursor                      | K.VTVLASDGSSTPAR.A                | 2 | 3.98 | 0.46 | -4.24 |
| IPI00006967 | Protocadherin-9 precursor                      | K.YTIVSGNNK.G                     | 2 | 2.41 | 0.27 | 1.22  |
| IPI00006967 | Protocadherin-9 precursor                      | R.EELPENVPIGNIPK.D                | 2 | 3.31 | 0.29 | -2.76 |
| IPI00006967 | Protocadherin-9 precursor                      | R.SLDREETAHK.V                    | 3 | 2.68 | 0.14 | -3.30 |
| IPI00006967 | Protocadherin-9 precursor                      | R.SLDREETAHKVTVLASDGSSTPAR.A      | 3 | 4.67 | 0.46 | -1.80 |
| IPI00006967 | Protocadherin-9 precursor                      | R.YIFGAQVAPATKR.L                 | 2 | 2.83 | 0.12 | -1.45 |
| IPI00006971 | Isoform 1 of Endosialin precursor              | R.AACGPSSCYALFPR.R                | 2 | 3.82 | 0.31 | -1.95 |
| IPI00006971 | Isoform 1 of Endosialin precursor              | R.ELGGDLATPR.T                    | 1 | 2.04 | 0.20 | -3.33 |
| IPI00006971 | Isoform 1 of Endosialin precursor              | R.LGFRPAEDDPHR.C                  | 2 | 1.94 | 0.06 | -2.14 |
| IPI00006971 | Isoform 1 of Endosialin precursor              | R.LGFRPAEDDPHR.C                  | 3 | 2.84 | 0.20 | -3.35 |
| IPI00006971 | Isoform 1 of Endosialin precursor              | R.LLWIGLQR.Q                      | 2 | 2.53 | 0.11 | -1.85 |
| IPI00006971 | Isoform 1 of Endosialin precursor              | R.TPEEAQRVDSL VGAGPASR.L          | 2 | 2.73 | 0.30 | -2.21 |
| IPI00006971 | Isoform 1 of Endosialin precursor              | R.TPEEAQRVDSL VGAGPASR.L          | 3 | 3.83 | 0.19 | -2.98 |
| IPI00006971 | Isoform 1 of Endosialin precursor              | R.VDSL VGAGPASR.L                 | 2 | 3.17 | 0.30 | -1.95 |
| IPI00006987 | ATP-dependent RNA helicase DDX24               | K.RLSGLLKVLDIM*PLTLHACM*HQK.Q     | 3 | 3.39 | 0.10 |       |
| IPI00007010 | Lysozyme-like protein 6 precursor              | K.SYSENCHVDCQDLLNPNLLAGIHCAK.R    | 3 | 3.38 | 0.06 |       |
| IPI00007040 | Zinc finger protein 222                        | K.CGKAFM*HNFQLQKHHR.I             | 2 | 1.60 | 0.06 | -5.37 |

|             |                                                          |                                           |   |      |      |       |
|-------------|----------------------------------------------------------|-------------------------------------------|---|------|------|-------|
| IPI00007047 | Protein S100-A8                                          | K.ELDINTDGAVNFQEFLILVIK.M                 | 2 | 5.67 | 0.52 | -6.15 |
| IPI00007047 | Protein S100-A8                                          | K.ELDINTDGAVNFQEFLILVIK.M                 | 3 | 5.43 | 0.49 | -5.72 |
| IPI00007047 | Protein S100-A8                                          | K.GNFHAVYR.D                              | 2 | 1.83 | 0.18 | -2.08 |
| IPI00007102 | Uncharacterized protein C17orf25                         | K.ILTPLVSLDTPGK.A                         | 2 | 2.91 | 0.38 | -3.94 |
| IPI00007102 | Uncharacterized protein C17orf25                         | K.IYEKDEEKQR.A                            | 2 | 1.84 | 0.18 | -0.92 |
| IPI00007102 | Uncharacterized protein C17orf25                         | K.LGNDFM*GITLASSQAVSNAR.K                 | 3 | 3.75 | 0.42 | -2.58 |
| IPI00007102 | Uncharacterized protein C17orf25                         | K.SLNYWCNLLGM*K.I                         | 2 | 3.70 | 0.30 | -2.16 |
| IPI00007193 | Isoform 2 of Ankyrin repeat domain-containing protein 26 | Q.DKMNFVDVSNLKDNEILSQQLFKTESK.L           | 3 | 3.55 | 0.18 | -2.15 |
| IPI00007199 | Protein Z-dependent protease inhibitor precursor         | K.ETSNFGFSLLR.K                           | 2 | 3.17 | 0.32 | -4.72 |
| IPI00007199 | Protein Z-dependent protease inhibitor precursor         | K.LFDEINPETK.L                            | 2 | 3.44 | 0.22 | -3.41 |
| IPI00007199 | Protein Z-dependent protease inhibitor precursor         | K.LILVDYILFK.G                            | 2 | 3.11 | 0.36 | -5.07 |
| IPI00007199 | Protein Z-dependent protease inhibitor precursor         | R.IFSPFADLSELSATGR.N                      | 2 | 4.76 | 0.55 | -3.26 |
| IPI00007199 | Protein Z-dependent protease inhibitor precursor         | R.YFDTECVPM*NFR.N                         | 2 | 1.73 | 0.14 | -3.44 |
| IPI00007221 | Plasma serine protease inhibitor precursor               | K.AVVEVDESGTR.A                           | 1 | 1.89 | 0.17 | -2.47 |
| IPI00007221 | Plasma serine protease inhibitor precursor               | K.AVVEVDESGTR.A                           | 2 | 3.26 | 0.45 | -2.97 |
| IPI00007221 | Plasma serine protease inhibitor precursor               | K.FSIEGSYQLEK.V                           | 2 | 3.23 | 0.26 | -3.65 |
| IPI00007221 | Plasma serine protease inhibitor precursor               | K.M*QILEGLGLNLQK.S                        | 2 | 3.47 | 0.22 |       |
| IPI00007221 | Plasma serine protease inhibitor precursor               | K.M*QQVENGLSEK.T                          | 2 | 3.00 | 0.26 | -2.07 |
| IPI00007221 | Plasma serine protease inhibitor precursor               | K.NLDSNAVIMVNYIFFK.A                      | 2 | 3.13 | 0.07 |       |
| IPI00007221 | Plasma serine protease inhibitor precursor               | K.TLYLADTFPTNFR.D                         | 2 | 3.28 | 0.28 | -3.95 |
| IPI00007221 | Plasma serine protease inhibitor precursor               | R.AAAATGTIFTFR.S                          | 2 | 3.86 | 0.53 | -2.70 |
| IPI00007221 | Plasma serine protease inhibitor precursor               | R.EDQYHYLLDR.N                            | 2 | 2.69 | 0.20 |       |
| IPI00007221 | Plasma serine protease inhibitor precursor               | R.GFQQLLQELNQPR.D                         | 2 | 3.54 | 0.23 | -3.48 |
| IPI00007221 | Plasma serine protease inhibitor precursor               | R.GFQQLLQELNQPR.D                         | 3 | 4.16 | 0.30 | -1.37 |
| IPI00007236 | Isoform 2 of Neuroligin-1 precursor                      | K.ELNNEILGPVIQFLGVPYAAPTGER.R             | 3 | 3.16 | 0.28 | -2.88 |
| IPI00007236 | Isoform 2 of Neuroligin-1 precursor                      | K.ELNNEILGPVIQFLGVPYAAPTGER.F             | 3 | 4.11 | 0.40 | -5.11 |
| IPI00007236 | Isoform 2 of Neuroligin-1 precursor                      | K.ELVDQDIQPAR.Y                           | 2 | 2.57 | 0.07 | -1.36 |
| IPI00007236 | Isoform 2 of Neuroligin-1 precursor                      | K.FVENIVSDDGISASDFDAVSNFVDNLYGYPEGK.D     | 3 | 4.56 | 0.52 | -2.11 |
| IPI00007236 | Isoform 2 of Neuroligin-1 precursor                      | K.FVENIVSDDGISASDFDAVSNFVDNLYGYPEGKDVLR.E | 3 | 4.98 | 0.54 | -3.34 |
| IPI00007236 | Isoform 2 of Neuroligin-1 precursor                      | K.GNYGLLDLIQALR.W                         | 2 | 4.12 | 0.24 | -4.60 |
| IPI00007236 | Isoform 2 of Neuroligin-1 precursor                      | K.GNYGLLDLIQALR.W                         | 3 | 5.31 | 0.31 | -2.89 |
| IPI00007236 | Isoform 2 of Neuroligin-1 precursor                      | K.KPYKELVDQDIQPAR.Y                       | 2 | 5.15 | 0.49 | -4.43 |
| IPI00007236 | Isoform 2 of Neuroligin-1 precursor                      | K.KPYKELVDQDIQPAR.Y                       | 3 | 4.83 | 0.24 | -2.99 |
| IPI00007236 | Isoform 2 of Neuroligin-1 precursor                      | R.AIAQSGTALSSWAVSFQPAK.Y                  | 2 | 5.77 | 0.49 | -3.50 |
| IPI00007236 | Isoform 2 of Neuroligin-1 precursor                      | R.AIAQSGTALSSWAVSFQPAK.Y                  | 3 | 2.73 | 0.11 | -3.43 |
| IPI00007236 | Isoform 2 of Neuroligin-1 precursor                      | R.LGVLFSTGDAQA.G                          | 2 | 5.01 | 0.48 | -3.60 |
| IPI00007236 | Isoform 2 of Neuroligin-1 precursor                      | R.WTSENIGFFGGDPLR.I                       | 2 | 4.52 | 0.43 | -4.08 |
| IPI00007240 | Coagulation factor XIII B chain precursor                | K.IQTHSTTYR.H                             | 2 | 1.86 | 0.13 | -2.02 |
| IPI00007240 | Coagulation factor XIII B chain precursor                | K.VLHGDLDIDFVCK.Q                         | 2 | 2.42 | 0.16 |       |
| IPI00007240 | Coagulation factor XIII B chain precursor                | R.CFDHFFLEGSR.E                           | 2 | 2.28 | 0.15 |       |
| IPI00007240 | Coagulation factor XIII B chain precursor                | R.GDTYPAELYITGSILR.M                      | 2 | 4.69 | 0.46 |       |



|             |                                                    |                                          |   |      |      |       |
|-------------|----------------------------------------------------|------------------------------------------|---|------|------|-------|
| IPI00007240 | Coagulation factor XIII B chain precursor          | R.IAQYYYTFK.S                            | 2 | 2.70 | 0.14 |       |
| IPI00007249 | ectonucleotide pyrophosphatase/phosphodiesterase 4 | K.KIDDLIGDLVQR.L                         | 2 | 3.95 | 0.35 | -1.62 |
| IPI00007249 | ectonucleotide pyrophosphatase/phosphodiesterase 4 | K.KIDDLIGDLVQR.L                         | 3 | 3.94 | 0.08 | -0.41 |
| IPI00007249 | ectonucleotide pyrophosphatase/phosphodiesterase 4 | K.LLLVSFDGFR.A                           | 2 | 3.27 | 0.23 | -4.04 |
| IPI00007249 | ectonucleotide pyrophosphatase/phosphodiesterase 4 | K.NYEFPHLQNFIE                           | 2 | 3.22 | 0.32 | -4.00 |
| IPI00007249 | ectonucleotide pyrophosphatase/phosphodiesterase 4 | R.LINLDSCIDHSYYTLIDLSPVAAILPK.I          | 3 | 2.66 | 0.11 | 2.09  |
| IPI00007257 | calsyntenin 1 isoform 2                            | D.PPLIALDKDAPLR.F                        | 2 | 3.96 | 0.32 | -4.13 |
| IPI00007257 | calsyntenin 1 isoform 2                            | D.PPLIALDKDAPLR.F                        | 3 | 3.80 | 0.38 | -2.57 |
| IPI00007257 | calsyntenin 1 isoform 2                            | I.PDGVVSVSPK.E                           | 2 | 3.32 | 0.40 | -1.49 |
| IPI00007257 | calsyntenin 1 isoform 2                            | K.AM*QHISYLNSR.Q                         | 2 | 3.52 | 0.37 | -3.84 |
| IPI00007257 | calsyntenin 1 isoform 2                            | K.AM*QHISYLNSR.Q                         | 3 | 4.15 | 0.31 | -4.11 |
| IPI00007257 | calsyntenin 1 isoform 2                            | K.ATVHIQVNDVNEYAPVFK.E                   | 2 | 5.28 | 0.56 | -4.37 |
| IPI00007257 | calsyntenin 1 isoform 2                            | K.ATVHIQVNDVNEYAPVFK.E                   | 3 | 5.17 | 0.35 | -5.40 |
| IPI00007257 | calsyntenin 1 isoform 2                            | K.ATVHIQVNDVNEYAPVFK.E.S                 | 2 | 5.80 | 0.50 | -5.13 |
| IPI00007257 | calsyntenin 1 isoform 2                            | K.ATVHIQVNDVNEYAPVFK.E.S                 | 3 | 5.92 | 0.45 | -4.24 |
| IPI00007257 | calsyntenin 1 isoform 2                            | K.ATVHIQVNDVNEYAPVFK.E.S                 | 4 | 4.80 | 0.36 | -3.41 |
| IPI00007257 | calsyntenin 1 isoform 2                            | K.CFNEATCISVPPVDGYVM*VLQPEEPK.I          | 3 | 2.47 | 0.07 | -4.61 |
| IPI00007257 | calsyntenin 1 isoform 2                            | K.CSELNGR.Y                              | 1 | 1.91 | 0.16 | -1.88 |
| IPI00007257 | calsyntenin 1 isoform 2                            | K.DYSFTIQAYDCGK.G                        | 2 | 4.68 | 0.55 | -4.60 |
| IPI00007257 | calsyntenin 1 isoform 2                            | K.DYSFTIQAYDCGKGPDTNVKK.S                | 3 | 4.02 | 0.42 | -0.92 |
| IPI00007257 | calsyntenin 1 isoform 2                            | K.DYSFTIQAYDCGKGPDTNVKK.S                | 4 | 2.73 | 0.35 | -1.21 |
| IPI00007257 | calsyntenin 1 isoform 2                            | K.EGLDLQVLEDSGR.G                        | 1 | 1.82 | 0.18 | -2.66 |
| IPI00007257 | calsyntenin 1 isoform 2                            | K.EGLDLQVLEDSGR.G                        | 2 | 4.86 | 0.49 | -5.86 |
| IPI00007257 | calsyntenin 1 isoform 2                            | K.EPFTISVWM*R.H                          | 2 | 2.39 | 0.35 | -4.43 |
| IPI00007257 | calsyntenin 1 isoform 2                            | K.ETILCSSDKTDM*NR.H                      | 2 | 3.90 | 0.45 | -1.66 |
| IPI00007257 | calsyntenin 1 isoform 2                            | K.ETILCSSDKTDM*NR.H                      | 3 | 3.03 | 0.39 | -0.98 |
| IPI00007257 | calsyntenin 1 isoform 2                            | K.FKLCSELNGR.Y                           | 3 | 3.78 | 0.17 | -1.61 |
| IPI00007257 | calsyntenin 1 isoform 2                            | K.GIEVSSSELGM*TFTGVDTM*ASYEEVLHLLR.Y     | 3 | 3.83 | 0.30 | -3.11 |
| IPI00007257 | calsyntenin 1 isoform 2                            | K.HKPWLEPTYHGIVTENDNTVLLDPPLIALDKDAPLR.F | 4 | 3.99 | 0.34 | -4.34 |
| IPI00007257 | calsyntenin 1 isoform 2                            | K.IHGQNVPFDAVVVDK.S                      | 2 | 4.98 | 0.50 | -3.62 |
| IPI00007257 | calsyntenin 1 isoform 2                            | K.IHGQNVPFDAVVVDK.S                      | 3 | 3.29 | 0.29 | -2.93 |
| IPI00007257 | calsyntenin 1 isoform 2                            | K.IHGQNVPFDAVVVDKSTGEGVIR.S              | 2 | 5.01 | 0.53 | -4.89 |
| IPI00007257 | calsyntenin 1 isoform 2                            | K.IHGQNVPFDAVVVDKSTGEGVIR.S              | 3 | 5.74 | 0.52 | -5.05 |
| IPI00007257 | calsyntenin 1 isoform 2                            | K.IHGQNVPFDAVVVDKSTGEGVIR.S              | 4 | 4.24 | 0.43 | -5.46 |
| IPI00007257 | calsyntenin 1 isoform 2                            | K.ISLSGVHHFAR.A                          | 2 | 3.16 | 0.25 | -2.13 |
| IPI00007257 | calsyntenin 1 isoform 2                            | K.LICSELNGR.Y                            | 1 | 2.35 | 0.29 | -2.78 |
| IPI00007257 | calsyntenin 1 isoform 2                            | K.LICSELNGR.Y                            | 2 | 2.51 | 0.22 | 2.09  |

|             |                         |                                               |   |      |      |       |
|-------------|-------------------------|-----------------------------------------------|---|------|------|-------|
| IPI00007257 | calsyntenin 1 isoform 2 | K.LNYGKEHQYK.L                                | 1 | 2.45 | 0.27 | -6.29 |
| IPI00007257 | calsyntenin 1 isoform 2 | K.LNYGKEHQYK.L                                | 2 | 3.53 | 0.36 | -4.17 |
| IPI00007257 | calsyntenin 1 isoform 2 | K.LTVTAYDCGK.K                                | 1 | 2.13 | 0.40 | -3.69 |
| IPI00007257 | calsyntenin 1 isoform 2 | K.LTVTAYDCGK.K                                | 2 | 3.72 | 0.35 | -2.63 |
| IPI00007257 | calsyntenin 1 isoform 2 | K.LTVTAYDCGK.K.R                              | 2 | 2.44 | 0.21 |       |
| IPI00007257 | calsyntenin 1 isoform 2 | K.NTEKLNYGK.E                                 | 1 | 2.52 | 0.17 | -2.09 |
| IPI00007257 | calsyntenin 1 isoform 2 | K.NTEKLNYGK.E                                 | 2 | 2.87 | 0.30 | -1.43 |
| IPI00007257 | calsyntenin 1 isoform 2 | K.NTEKLNYGKEHQYK.L                            | 2 | 3.65 | 0.38 | -4.44 |
| IPI00007257 | calsyntenin 1 isoform 2 | K.NTEKLNYGKEHQYK.L                            | 3 | 2.92 | 0.23 | -3.48 |
| IPI00007257 | calsyntenin 1 isoform 2 | K.RATEDVLVK.I                                 | 2 | 2.42 | 0.09 | -0.67 |
| IPI00007257 | calsyntenin 1 isoform 2 | K.STGEGVIR.S                                  | 1 | 1.48 | 0.05 | -2.72 |
| IPI00007257 | calsyntenin 1 isoform 2 | K.STGEGVIR.S                                  | 2 | 2.16 | 0.07 | -2.74 |
| IPI00007257 | calsyntenin 1 isoform 2 | K.SYKATVIEGK.Q                                | 1 | 2.51 | 0.07 | -1.49 |
| IPI00007257 | calsyntenin 1 isoform 2 | K.SYKATVIEGK.Q                                | 2 | 2.66 | 0.17 | -3.09 |
| IPI00007257 | calsyntenin 1 isoform 2 | K.VEVNVIHTANPM*EHANH.M                        | 2 | 4.80 | 0.54 | -3.09 |
| IPI00007257 | calsyntenin 1 isoform 2 | K.VIDCLYTCK.E                                 | 1 | 2.08 | 0.21 | -3.75 |
| IPI00007257 | calsyntenin 1 isoform 2 | K.VIDCLYTCK.E                                 | 2 | 3.65 | 0.36 | -3.48 |
| IPI00007257 | calsyntenin 1 isoform 2 | K.VIDCLYTCKEGLDLQVLEDSGR.G                    | 2 | 4.80 | 0.45 | -4.58 |
| IPI00007257 | calsyntenin 1 isoform 2 | K.VIDCLYTCKEGLDLQVLEDSGR.G                    | 3 | 5.50 | 0.46 | -2.92 |
| IPI00007257 | calsyntenin 1 isoform 2 | M.AAQPQFVHPEHR.S                              | 2 | 3.19 | 0.37 | -4.60 |
| IPI00007257 | calsyntenin 1 isoform 2 | P.DGVVSVSPKEPFTISVWM*R.H                      | 2 | 3.29 | 0.26 | -4.51 |
| IPI00007257 | calsyntenin 1 isoform 2 | P.DGVVSVSPKEPFTISVWM*R.H                      | 3 | 3.93 | 0.41 | -1.89 |
| IPI00007257 | calsyntenin 1 isoform 2 | Q.PQFVHPEHR.S                                 | 2 | 2.92 | 0.32 | -3.59 |
| IPI00007257 | calsyntenin 1 isoform 2 | R.AASEFESSEGVFLFPELR.I                        | 2 | 4.71 | 0.45 | -8.90 |
| IPI00007257 | calsyntenin 1 isoform 2 | R.AASEFESSEGVFLFPELR.I                        | 3 | 5.03 | 0.31 | -4.67 |
| IPI00007257 | calsyntenin 1 isoform 2 | R.ATEDVLVK.I                                  | 1 | 2.30 | 0.10 | -2.76 |
| IPI00007257 | calsyntenin 1 isoform 2 | R.ATEDVLVK.I                                  | 2 | 2.79 | 0.10 | -2.54 |
| IPI00007257 | calsyntenin 1 isoform 2 | R.FAGEICGFK.I                                 | 1 | 2.01 | 0.21 | -2.18 |
| IPI00007257 | calsyntenin 1 isoform 2 | R.FAGEICGFK.I                                 | 2 | 2.13 | 0.19 | -1.42 |
| IPI00007257 | calsyntenin 1 isoform 2 | R.GNLAGLTLR.S                                 | 1 | 1.65 | 0.11 | -1.41 |
| IPI00007257 | calsyntenin 1 isoform 2 | R.GNLAGLTLR.S                                 | 2 | 3.34 | 0.37 | -2.13 |
| IPI00007257 | calsyntenin 1 isoform 2 | R.GVQIQAHPSQLVLTLEGEDLGELDK.A                 | 2 | 5.85 | 0.47 | -2.90 |
| IPI00007257 | calsyntenin 1 isoform 2 | R.GVQIQAHPSQLVLTLEGEDLGELDK.A                 | 3 | 6.12 | 0.40 | -5.09 |
| IPI00007257 | calsyntenin 1 isoform 2 | R.GVQIQAHPSQLVLTLEGEDLGELDK.A                 | 4 | 5.78 | 0.39 | -2.81 |
| IPI00007257 | calsyntenin 1 isoform 2 | R.GVQIQAHPSQLVLTLEGEDLGELDKAM*QHISYLNRS.Q     | 3 | 4.69 | 0.55 | -3.96 |
| IPI00007257 | calsyntenin 1 isoform 2 | R.GVQIQAHPSQLVLTLEGEDLGELDKAM*QHISYLNRS.Q     | 4 | 8.33 | 0.54 | -6.93 |
| IPI00007257 | calsyntenin 1 isoform 2 | R.GVQIQAHPSQLVLTLEGEDLGELDKAM*QHISYLNRS.Q     | 5 | 4.44 | 0.43 | -5.15 |
| IPI00007257 | calsyntenin 1 isoform 2 | R.IEYEPGTGALAVFPNIHLETCDPEVASVQATVELETSHIGK.G | 4 | 3.22 | 0.21 | -3.28 |
| IPI00007257 | calsyntenin 1 isoform 2 | R.IPDGVVSVSPK.E                               | 1 | 2.03 | 0.33 | -3.87 |
| IPI00007257 | calsyntenin 1 isoform 2 | R.IPDGVVSVSPK.E                               | 2 | 3.14 | 0.38 | -2.96 |
| IPI00007257 | calsyntenin 1 isoform 2 | R.IPDGVVSVSPKEPF.T                            | 2 | 4.05 | 0.47 | -2.64 |
| IPI00007257 | calsyntenin 1 isoform 2 | R.IPDGVVSVSPKEPFTISVWM*R.H                    | 3 | 4.68 | 0.55 | -3.17 |

|             |                                                                   |                                              |   |      |      |       |
|-------------|-------------------------------------------------------------------|----------------------------------------------|---|------|------|-------|
| IPI00007257 | calsyntenin 1 isoform 2                                           | R.LIFLFRQDPSEEKK.Y                           | 2 | 2.48 | 0.10 | -2.58 |
| IPI00007257 | calsyntenin 1 isoform 2                                           | R.LIFLFRQDPSEEKK.Y                           | 3 | 3.12 | 0.18 | -2.10 |
| IPI00007257 | calsyntenin 1 isoform 2                                           | R.LKITSTIK.C                                 | 1 | 2.09 | 0.21 | -4.13 |
| IPI00007257 | calsyntenin 1 isoform 2                                           | R.SFVDLSGHNLANPHPF.A                         | 2 | 4.17 | 0.48 | -3.37 |
| IPI00007257 | calsyntenin 1 isoform 2                                           | R.SFVDLSGHNLANPHPF.A                         | 3 | 4.84 | 0.50 | -2.07 |
| IPI00007257 | calsyntenin 1 isoform 2                                           | R.SFVDLSGHNLANPHPFVVPSTA.T                   | 2 | 4.47 | 0.57 | -3.64 |
| IPI00007257 | calsyntenin 1 isoform 2                                           | R.SFVDLSGHNLANPHPFVVPSTAT.V                  | 2 | 4.76 | 0.52 | -4.11 |
| IPI00007257 | calsyntenin 1 isoform 2                                           | R.SFVDLSGHNLANPHPFVVPSTATV.V                 | 2 | 5.00 | 0.54 | -3.24 |
| IPI00007257 | calsyntenin 1 isoform 2                                           | R.SFVDLSGHNLANPHPFVVPSTATVV.I                | 2 | 3.98 | 0.37 | -2.45 |
| IPI00007257 | calsyntenin 1 isoform 2                                           | R.SFVDLSGHNLANPHPFVVPSTATVI.V                | 2 | 4.17 | 0.38 | -2.51 |
| IPI00007257 | calsyntenin 1 isoform 2                                           | R.VEAVDADCSPQFSQICSYEIITPDVPFTVDKDGYIK.N     | 3 | 5.78 | 0.61 | -3.95 |
| IPI00007257 | calsyntenin 1 isoform 2                                           | R.VEAVDADCSPQFSQICSYEIITPDVPFTVDKDGYIK.N     | 4 | 4.54 | 0.37 | -3.84 |
| IPI00007257 | calsyntenin 1 isoform 2                                           | R.VEAVDADCSPQFSQICSYEIITPDVPFTVDKDGYIKNTEK.L | 4 | 5.79 | 0.35 | -2.78 |
| IPI00007257 | calsyntenin 1 isoform 2                                           | R.YISNEFK.V                                  | 1 | 2.32 | 0.12 | -1.62 |
| IPI00007257 | calsyntenin 1 isoform 2                                           | V.PFDVVVDK.S                                 | 1 | 2.67 | 0.19 | -5.98 |
| IPI00007257 | calsyntenin 1 isoform 2                                           | V.PFDVVVDK.S                                 | 2 | 3.54 | 0.24 | -1.24 |
| IPI00007257 | calsyntenin 1 isoform 2                                           | W.LEPTYHGIVTENDNTVLLDPPLIALDK.D              | 3 | 4.10 | 0.29 | -4.31 |
| IPI00007257 | calsyntenin 1 isoform 2                                           | W.LEPTYHGIVTENDNTVLLDPPLIALDKDAPLR.F         | 3 | 6.13 | 0.53 | -4.49 |
| IPI00007257 | calsyntenin 1 isoform 2                                           | W.LEPTYHGIVTENDNTVLLDPPLIALDKDAPLR.F         | 4 | 4.50 | 0.42 | -3.77 |
| IPI00007277 | Isoform 1 of Leucine-rich repeat flightless-interacting protein 2 | R.SSPGFTNDDTASIVSSDRASRGR.R                  | 3 | 1.89 | 0.13 | 1.48  |
| IPI00007321 | Isoform 1 of Acyl-protein thioesterase 1                          | K.LKTLVNPANVTFKTYEGMMHSSCQEMMDVK.Q           | 3 | 2.95 | 0.12 |       |
| IPI00007402 | Importin-7                                                        | K.QLQDIATLADQRRRAAHEKMKIEK.H                 | 3 | 3.37 | 0.08 |       |
| IPI00007425 | desmocollin 1 isoform Dsc1b preproprotein                         | K.VNLEECLK.S                                 | 2 | 2.36 | 0.15 | -2.14 |
| IPI00007425 | desmocollin 1 isoform Dsc1b preproprotein                         | R.ILEDGSIYTTHDLILSSER.K                      | 3 | 3.29 | 0.24 | -2.99 |
| IPI00007425 | desmocollin 1 isoform Dsc1b preproprotein                         | R.KSFSIFLSDGQR.R                             | 3 | 3.05 | 0.10 | -2.84 |
| IPI00007425 | desmocollin 1 isoform Dsc1b preproprotein                         | R.VPSHLQAETLVGK.V                            | 2 | 3.43 | 0.33 | -2.40 |
| IPI00007512 | Glutathione transferase omega-2                                   | K.LFPYDPYERARQKM*LLELFCKVPHLTK.E             | 4 | 2.97 | 0.21 | -7.94 |
| IPI00007617 | Olfactory receptor 52A1                                           | K.LAAANVQVVK.I                               | 2 | 2.21 | 0.10 |       |
| IPI00007682 | Vacuolar ATP synthase catalytic subunit A                         | K.EILQEEEDLAEIVQLVGK.A                       | 3 | 2.35 | 0.16 | -3.02 |
| IPI00007702 | Heat shock-related 70 kDa protein 2                               | K.DIGPNKR.A                                  | 2 | 1.28 | 0.05 | 0.61  |
| IPI00007702 | Heat shock-related 70 kDa protein 2                               | K.ITITNDKGR.L                                | 1 | 2.08 | 0.20 | -3.55 |
| IPI00007702 | Heat shock-related 70 kDa protein 2                               | K.ITITNDKGR.L                                | 2 | 2.65 | 0.24 | -2.81 |
| IPI00007702 | Heat shock-related 70 kDa protein 2                               | K.NALESYTYNIK.Q                              | 2 | 3.28 | 0.35 | -2.82 |
| IPI00007702 | Heat shock-related 70 kDa protein 2                               | K.VQVEYKGETK.S                               | 2 | 2.40 | 0.21 | -2.65 |
| IPI00007702 | Heat shock-related 70 kDa protein 2                               | R.LIGDAAK.N                                  | 1 | 1.96 | 0.12 | -2.67 |
| IPI00007702 | Heat shock-related 70 kDa protein 2                               | R.NQM*AEKDEYEHK.Q                            | 3 | 3.05 | 0.19 | -1.09 |
| IPI00007702 | Heat shock-related 70 kDa protein 2                               | R.NVLIFDLGGGTFDVSILTIEDGIFEVK.S              | 3 | 3.32 | 0.29 | -3.03 |
| IPI00007702 | Heat shock-related 70 kDa protein 2                               | R.TTSPSYVAFTDTER.L                           | 2 | 2.87 | 0.41 | -0.70 |
| IPI00007709 | Isoform 1 of ADAM 28 precursor                                    | A.KEPEQQEQFETELK.Y                           | 3 | 3.60 | 0.28 | -0.36 |
| IPI00007709 | Isoform 1 of ADAM 28 precursor                                    | K.IAVLYLK.K                                  | 2 | 2.39 | 0.21 | -3.23 |
| IPI00007709 | Isoform 1 of ADAM 28 precursor                                    | K.IAVLYLKK.N                                 | 2 | 2.51 | 0.16 | -1.99 |

|             |                                                    |                                             |   |      |      |       |
|-------------|----------------------------------------------------|---------------------------------------------|---|------|------|-------|
| IPI00007709 | Isoform 1 of ADAM 28 precursor                     | R.YFIEPLSPIHR.D                             | 3 | 3.02 | 0.31 | -2.50 |
| IPI00007750 | Tubulin alpha-4A chain                             | K.AYHEQLSVAEITNACFEPANQMVK.C                | 3 | 3.76 | 0.34 | -2.56 |
| IPI00007750 | Tubulin alpha-4A chain                             | K.LSDQCTGLQGFLVFHSGGGTSGSFTSLLMER.L         | 3 | 3.78 | 0.38 | -3.69 |
| IPI00007750 | Tubulin alpha-4A chain                             | R.AFVHWYVYVGEEMEEGFSEAR.E                   | 3 | 4.15 | 0.38 | -2.46 |
| IPI00007750 | Tubulin alpha-4A chain                             | R.AVCMLSNTTAIAEAWAR.L                       | 2 | 4.25 | 0.45 | -1.86 |
| IPI00007750 | Tubulin alpha-4A chain                             | R.AVCMLSNTTAIAEAWAR.L                       | 3 | 3.49 | 0.23 | -0.91 |
| IPI00007750 | Tubulin alpha-4A chain                             | R.FDGALNVDLTEFQTNLVPYPR.I                   | 2 | 5.18 | 0.51 | -1.99 |
| IPI00007750 | Tubulin alpha-4A chain                             | R.FDGALNVDLTEFQTNLVPYPR.I                   | 3 | 2.65 | 0.18 | -2.07 |
| IPI00007750 | Tubulin alpha-4A chain                             | R.LISQIVSSITASLR.F                          | 2 | 3.75 | 0.45 | -2.19 |
| IPI00007750 | Tubulin alpha-4A chain                             | R.LISQIVSSITASLR.F                          | 3 | 2.59 | 0.17 | -0.56 |
| IPI00007752 | Tubulin beta-2C chain                              | K.GHYTEGAELVDSVLDVVR.K                      | 2 | 2.94 | 0.28 |       |
| IPI00007752 | Tubulin beta-2C chain                              | K.GHYTEGAELVDSVLDVVR.K                      | 3 | 3.28 | 0.30 | -3.01 |
| IPI00007752 | Tubulin beta-2C chain                              | K.GHYTEGAELVDSVLDVVRK.E                     | 3 | 3.51 | 0.45 | -3.20 |
| IPI00007752 | Tubulin beta-2C chain                              | K.NM*M*AACDPR.H                             | 2 | 1.73 | 0.12 | 0.11  |
| IPI00007752 | Tubulin beta-2C chain                              | K.VSDTVVEPYNATLSVHQLVENTDETYCIDNEALYDICFR.T | 3 | 4.91 | 0.43 | -2.95 |
| IPI00007752 | Tubulin beta-2C chain                              | K.VSDTVVEPYNATLSVHQLVENTDETYCIDNEALYDICFR.T | 4 | 4.05 | 0.34 | -2.05 |
| IPI00007752 | Tubulin beta-2C chain                              | R.ISEQFTAM*FR.R                             | 2 | 2.17 | 0.13 | -2.65 |
| IPI00007752 | Tubulin beta-2C chain                              | R.ISEQFTAMFR.R                              | 2 | 2.87 | 0.27 | -0.81 |
| IPI00007752 | Tubulin beta-2C chain                              | R.LHFFM*PGFAPLTSR.G                         | 3 | 3.20 | 0.06 | -3.00 |
| IPI00007752 | Tubulin beta-2C chain                              | R.LHFFMPGFAPLTSR.G                          | 3 | 2.62 | 0.11 | -1.73 |
| IPI00007778 | Di-N-acetylchitobiase precursor                    | K.ATYIQNYR.L                                | 1 | 1.93 | 0.16 | 0.53  |
| IPI00007778 | Di-N-acetylchitobiase precursor                    | K.ATYIQNYR.L                                | 2 | 2.59 | 0.28 | -0.42 |
| IPI00007778 | Di-N-acetylchitobiase precursor                    | K.ETDSEFHR.E                                | 2 | 1.92 | 0.15 | -1.84 |
| IPI00007778 | Di-N-acetylchitobiase precursor                    | K.GDVSLKDIIDPAFR.A                          | 2 | 2.82 | 0.36 | -1.12 |
| IPI00007778 | Di-N-acetylchitobiase precursor                    | K.GDVSLKDIIDPAFR.A                          | 3 | 3.58 | 0.07 | -1.01 |
| IPI00007778 | Di-N-acetylchitobiase precursor                    | K.M*SINPK.K                                 | 1 | 1.35 | 0.06 | -2.57 |
| IPI00007778 | Di-N-acetylchitobiase precursor                    | K.SYDWSQITTVATFGK.Y                         | 2 | 5.57 | 0.55 | -2.11 |
| IPI00007778 | Di-N-acetylchitobiase precursor                    | R.HHPDFEVFVFDVGQK.T                         | 2 | 3.80 | 0.39 | -3.21 |
| IPI00007778 | Di-N-acetylchitobiase precursor                    | R.HHPDFEVFVFDVGQK.T                         | 3 | 3.98 | 0.30 | -4.07 |
| IPI00007778 | Di-N-acetylchitobiase precursor                    | R.HHPDFEVFVFDVGQK.T                         | 4 | 3.16 | 0.18 | -3.19 |
| IPI00007778 | Di-N-acetylchitobiase precursor                    | R.VVLKGDVSLKDIIDPAFR.A                      | 3 | 3.89 | 0.48 | -3.19 |
| IPI00007778 | Di-N-acetylchitobiase precursor                    | R.VVLKGDVSLKDIIDPAFR.A                      | 4 | 2.63 | 0.31 | -2.28 |
| IPI00007778 | Di-N-acetylchitobiase precursor                    | W.YDNPQSSISLK.A                             | 2 | 2.94 | 0.26 | -0.40 |
| IPI00007797 | Fatty acid-binding protein, epidermal              | K.ELGVGIALR.K                               | 2 | 2.35 | 0.08 | -2.18 |
| IPI00007797 | Fatty acid-binding protein, epidermal              | K.FEETTADGRK.T                              | 2 | 2.37 | 0.11 | -1.15 |
| IPI00007797 | Fatty acid-binding protein, epidermal              | K.GFDEYM*K.E                                | 1 | 1.50 | 0.08 | -2.73 |
| IPI00007797 | Fatty acid-binding protein, epidermal              | K.LVVECVM*NNVTCTR.I                         | 2 | 4.11 | 0.42 | -2.93 |
| IPI00007797 | Fatty acid-binding protein, epidermal              | K.TTQFSCTLGEK.F                             | 2 | 2.59 | 0.19 | -2.67 |
| IPI00007798 | Thyrotropin-releasing hormone-degrading ectoenzyme | K.IIYNALIENELLGFFR.S                        | 2 | 4.42 | 0.47 | -1.64 |
| IPI00007798 | Thyrotropin-releasing hormone-degrading ectoenzyme | K.IIYNALIENELLGFFR.S                        | 3 | 2.48 | 0.22 | -2.68 |

|             |                                                                |                                        |   |      |      |       |
|-------------|----------------------------------------------------------------|----------------------------------------|---|------|------|-------|
| IPI00007798 | Thyrotropin-releasing hormone-degrading ectoenzyme             | K.M*LYQDELFWLQK.A                      | 2 | 4.77 | 0.45 | -4.22 |
| IPI00007798 | Thyrotropin-releasing hormone-degrading ectoenzyme             | K.NYDGVAAASFSR.A                       | 2 | 3.59 | 0.48 | -2.79 |
| IPI00007798 | Thyrotropin-releasing hormone-degrading ectoenzyme             | R.AGLIDDAFSLAR.A                       | 2 | 4.27 | 0.25 | -3.61 |
| IPI00007798 | Thyrotropin-releasing hormone-degrading ectoenzyme             | R.AGYLPQNIPLEIIR.Y                     | 2 | 3.49 | 0.39 | -3.31 |
| IPI00007798 | Thyrotropin-releasing hormone-degrading ectoenzyme             | R.FLGVTFQFSPTAR.K                      | 2 | 2.64 | 0.29 | -4.23 |
| IPI00007798 | Thyrotropin-releasing hormone-degrading ectoenzyme             | R.FLTDVLHEVM*LLDGLASSHPVSQEVLQATDIDR.V | 4 | 3.30 | 0.22 | -2.88 |
| IPI00007798 | Thyrotropin-releasing hormone-degrading ectoenzyme             | R.YVVLHASR.V                           | 2 | 2.35 | 0.20 | -4.00 |
| IPI00007812 | Vacuolar ATP synthase subunit B, brain isoform                 | K.AVVGEEALTSDDLLYLEFLQK.F              | 2 | 5.58 | 0.51 | -2.50 |
| IPI00007812 | Vacuolar ATP synthase subunit B, brain isoform                 | K.AVVGEEALTSDDLLYLEFLQK.F              | 3 | 2.78 | 0.19 | -0.94 |
| IPI00007812 | Vacuolar ATP synthase subunit B, brain isoform                 | K.SKDVVDYSEENFAIVFAAMGVNMETAR.F        | 3 | 3.11 | 0.09 | -2.16 |
| IPI00007834 | Isoform 1 of Ankyrin-2                                         | R.LRCFCM*TDDKVDKTLQEQENFAEVAR.S        | 3 | 2.66 | 0.09 | -5.08 |
| IPI00007853 | Gamma-interferon-inducible lysosomal thiol reductase precursor | A.SPLQALDFFGNGPPVNYK.T                 | 2 | 5.86 | 0.51 | -4.66 |
| IPI00007853 | Gamma-interferon-inducible lysosomal thiol reductase precursor | A.SPLQALDFFGNGPPVNYK.T                 | 3 | 4.43 | 0.40 | -1.55 |
| IPI00007853 | Gamma-interferon-inducible lysosomal thiol reductase precursor | K.TGNLYLR.G                            | 2 | 2.62 | 0.07 | -1.92 |
| IPI00007921 | Isoform 1 of Neurexin-2-alpha precursor                        | G.LEFGGGPGQWAR.Y                       | 1 | 2.25 | 0.21 | -2.15 |
| IPI00007921 | Isoform 1 of Neurexin-2-alpha precursor                        | G.LEFGGGPGQWAR.Y                       | 2 | 3.51 | 0.36 | -3.09 |
| IPI00007921 | Isoform 1 of Neurexin-2-alpha precursor                        | K.DGDITYCELNAR.F                       | 2 | 3.78 | 0.38 | -6.71 |
| IPI00007921 | Isoform 1 of Neurexin-2-alpha precursor                        | K.DVVYK.N                              | 1 | 1.46 | 0.08 | -3.57 |
| IPI00007921 | Isoform 1 of Neurexin-2-alpha precursor                        | K.GKEEFVATFK.G                         | 1 | 2.39 | 0.30 | -4.24 |
| IPI00007921 | Isoform 1 of Neurexin-2-alpha precursor                        | K.GKEEFVATFK.G                         | 2 | 2.77 | 0.35 | -2.75 |
| IPI00007921 | Isoform 1 of Neurexin-2-alpha precursor                        | K.GNEFFCYDLSHNPIQSSTDEITLAFR.T         | 3 | 5.25 | 0.53 | -1.36 |
| IPI00007921 | Isoform 1 of Neurexin-2-alpha precursor                        | K.GPETLFAGHKLNDNEWHTVRVVR.R            | 3 | 2.74 | 0.07 | 2.07  |
| IPI00007921 | Isoform 1 of Neurexin-2-alpha precursor                        | K.GSISVNSR.S                           | 2 | 2.03 | 0.09 | -2.77 |
| IPI00007921 | Isoform 1 of Neurexin-2-alpha precursor                        | K.IGGRDQGRPFQGVVSGLYNGLK.V             | 3 | 4.33 | 0.40 | -2.79 |
| IPI00007921 | Isoform 1 of Neurexin-2-alpha precursor                        | K.IGGRDQGRPFQGVVSGLYNGLK.V             | 4 | 3.18 | 0.18 | -1.26 |
| IPI00007921 | Isoform 1 of Neurexin-2-alpha precursor                        | K.IM*LPNAM*HTEAEDVSLR.F                | 2 | 4.27 | 0.45 | -3.86 |
| IPI00007921 | Isoform 1 of Neurexin-2-alpha precursor                        | K.LGERPPALLGSQGLR.G                    | 2 | 3.23 | 0.35 | -4.01 |
| IPI00007921 | Isoform 1 of Neurexin-2-alpha precursor                        | K.LGERPPALLGSQGLR.G                    | 3 | 4.48 | 0.34 | -2.69 |
| IPI00007921 | Isoform 1 of Neurexin-2-alpha precursor                        | K.LQGDLNFR.C                           | 1 | 1.94 | 0.12 | -3.85 |
| IPI00007921 | Isoform 1 of Neurexin-2-alpha precursor                        | K.LQGDLNFR.C                           | 2 | 2.81 | 0.15 | -2.61 |
| IPI00007921 | Isoform 1 of Neurexin-2-alpha precursor                        | K.NM*FSNLPK.L                          | 2 | 2.15 | 0.11 | 0.24  |
| IPI00007921 | Isoform 1 of Neurexin-2-alpha precursor                        | K.NNDFKLELSR.L                         | 2 | 2.82 | 0.13 | -2.90 |

|             |                                         |                                   |   |      |      |       |
|-------------|-----------------------------------------|-----------------------------------|---|------|------|-------|
| IPI00007921 | Isoform 1 of Neurexin-2-alpha precursor | K.SADYVNLSLK.S                    | 1 | 2.04 | 0.21 | -2.90 |
| IPI00007921 | Isoform 1 of Neurexin-2-alpha precursor | K.SADYVNLSLK.S                    | 2 | 3.46 | 0.35 | -2.53 |
| IPI00007921 | Isoform 1 of Neurexin-2-alpha precursor | K.VLALAAESDPNVR.T                 | 2 | 4.70 | 0.50 | -2.98 |
| IPI00007921 | Isoform 1 of Neurexin-2-alpha precursor | K.VLALAAESDPNVR.T                 | 3 | 3.23 | 0.22 | -2.13 |
| IPI00007921 | Isoform 1 of Neurexin-2-alpha precursor | K.VLALAAESDPNVRTEGHLR.L           | 3 | 3.47 | 0.36 | -3.22 |
| IPI00007921 | Isoform 1 of Neurexin-2-alpha precursor | L.TLNSEVGSLLFSEGGAGR.G            | 2 | 3.70 | 0.36 | -3.90 |
| IPI00007921 | Isoform 1 of Neurexin-2-alpha precursor | R.AIVADPVTFK.S                    | 2 | 3.03 | 0.32 | -2.78 |
| IPI00007921 | Isoform 1 of Neurexin-2-alpha precursor | R.AYGLM*M*ATTSR.E                 | 2 | 3.21 | 0.45 | -2.56 |
| IPI00007921 | Isoform 1 of Neurexin-2-alpha precursor | R.CEDVAALDPVTFESPEAFVALPR.W       | 2 | 6.43 | 0.55 | -5.65 |
| IPI00007921 | Isoform 1 of Neurexin-2-alpha precursor | R.CEDVAALDPVTFESPEAFVALPR.W       | 3 | 4.18 | 0.45 | -4.21 |
| IPI00007921 | Isoform 1 of Neurexin-2-alpha precursor | R.DGFQGCCLASVDLNGR.L              | 2 | 4.89 | 0.57 | -5.11 |
| IPI00007921 | Isoform 1 of Neurexin-2-alpha precursor | R.DGFQGCCLASVDLNGRLPDLIADALHR.I   | 3 | 4.53 | 0.44 | -3.83 |
| IPI00007921 | Isoform 1 of Neurexin-2-alpha precursor | R.DLFIDGR.S                       | 1 | 2.11 | 0.13 | -1.89 |
| IPI00007921 | Isoform 1 of Neurexin-2-alpha precursor | R.DPGNVHTLK.I                     | 2 | 1.68 | 0.17 | -1.83 |
| IPI00007921 | Isoform 1 of Neurexin-2-alpha precursor | R.DQGRPFQGGVSGLYNGLK.V            | 2 | 4.64 | 0.19 | -2.47 |
| IPI00007921 | Isoform 1 of Neurexin-2-alpha precursor | R.DQGRPFQGGVSGLYNGLK.V            | 3 | 5.32 | 0.30 | -1.75 |
| IPI00007921 | Isoform 1 of Neurexin-2-alpha precursor | R.EATVLSYDGSYM*K.I                | 2 | 4.74 | 0.13 | -3.25 |
| IPI00007921 | Isoform 1 of Neurexin-2-alpha precursor | R.EM*QVASDLFVGGIPPDVR.L           | 2 | 4.24 | 0.40 | -4.43 |
| IPI00007921 | Isoform 1 of Neurexin-2-alpha precursor | R.EM*QVASDLFVGGIPPDVR.L           | 3 | 3.31 | 0.14 | -3.29 |
| IPI00007921 | Isoform 1 of Neurexin-2-alpha precursor | R.ESADTLRLELDGGQM*K.L             | 2 | 2.41 | 0.14 | -3.70 |
| IPI00007921 | Isoform 1 of Neurexin-2-alpha precursor | R.ESADTLRLELDGGQM*K.L             | 3 | 2.36 | 0.09 | -2.34 |
| IPI00007921 | Isoform 1 of Neurexin-2-alpha precursor | R.FICDCIGTGLGR.V                  | 2 | 4.11 | 0.51 | -4.28 |
| IPI00007921 | Isoform 1 of Neurexin-2-alpha precursor | R.GATADPLCAPAR.N                  | 2 | 2.30 | 0.25 | -3.54 |
| IPI00007921 | Isoform 1 of Neurexin-2-alpha precursor | R.GLAEAQGA VG VAPFCSR.E           | 2 | 5.11 | 0.45 | -3.00 |
| IPI00007921 | Isoform 1 of Neurexin-2-alpha precursor | R.KGSISVNSR.S                     | 2 | 1.64 | 0.07 | -2.32 |
| IPI00007921 | Isoform 1 of Neurexin-2-alpha precursor | R.KPAPRPNLR.T                     | 2 | 1.93 | 0.06 | -2.76 |
| IPI00007921 | Isoform 1 of Neurexin-2-alpha precursor | R.LAVGFSTHQR.S                    | 1 | 1.86 | 0.11 | -2.56 |
| IPI00007921 | Isoform 1 of Neurexin-2-alpha precursor | R.LAVGFSTHQR.S                    | 2 | 3.08 | 0.24 | -2.06 |
| IPI00007921 | Isoform 1 of Neurexin-2-alpha precursor | R.LEFHNIETGIM*TER.R               | 2 | 3.26 | 0.34 | -1.90 |
| IPI00007921 | Isoform 1 of Neurexin-2-alpha precursor | R.LEFHNIETGIM*TER.R               | 3 | 4.00 | 0.31 | -1.30 |
| IPI00007921 | Isoform 1 of Neurexin-2-alpha precursor | R.LPDLIADALHR.I                   | 2 | 3.73 | 0.31 | -1.40 |
| IPI00007921 | Isoform 1 of Neurexin-2-alpha precursor | R.LPDLIADALHR.I                   | 3 | 3.84 | 0.34 | -2.68 |
| IPI00007921 | Isoform 1 of Neurexin-2-alpha precursor | R.LSALTLSTVK.Y                    | 1 | 1.55 | 0.15 | -3.39 |
| IPI00007921 | Isoform 1 of Neurexin-2-alpha precursor | R.LSALTLSTVK.Y                    | 2 | 3.42 | 0.30 | -3.00 |
| IPI00007921 | Isoform 1 of Neurexin-2-alpha precursor | R.LSALTLSTVKYEPPFR.G              | 2 | 4.12 | 0.41 | -3.10 |
| IPI00007921 | Isoform 1 of Neurexin-2-alpha precursor | R.LSALTLSTVKYEPPFR.G              | 3 | 3.74 | 0.37 | -1.88 |
| IPI00007921 | Isoform 1 of Neurexin-2-alpha precursor | R.LSALTLSTVKYEPPFRGLLANLK.L       | 3 | 3.18 | 0.18 | -5.31 |
| IPI00007921 | Isoform 1 of Neurexin-2-alpha precursor | R.NGLM*LHTGK.S                    | 2 | 2.94 | 0.13 |       |
| IPI00007921 | Isoform 1 of Neurexin-2-alpha precursor | R.NPCANGGLCTVLAPGEVGCDCSHTGFGGK.F | 3 | 5.18 | 0.50 | -3.29 |
| IPI00007921 | Isoform 1 of Neurexin-2-alpha precursor | R.NYISNSAQSN GAVVK.E              | 2 | 4.83 | 0.42 | -1.90 |
| IPI00007921 | Isoform 1 of Neurexin-2-alpha precursor | R.QLTIFNSQAAIK.I                  | 1 | 1.61 | 0.18 | -2.57 |
| IPI00007921 | Isoform 1 of Neurexin-2-alpha precursor | R.QLTIFNSQAAIK.I                  | 2 | 4.01 | 0.32 | -3.86 |

|             |                                                                                    |                                         |   |      |      |       |
|-------------|------------------------------------------------------------------------------------|-----------------------------------------|---|------|------|-------|
| IPI00007921 | Isoform 1 of Neurexin-2-alpha precursor                                            | R.RTALAVDGEAR.A                         | 2 | 2.42 | 0.11 |       |
| IPI00007921 | Isoform 1 of Neurexin-2-alpha precursor                                            | R.TALAVDGEAR.A                          | 1 | 2.25 | 0.26 | -3.59 |
| IPI00007921 | Isoform 1 of Neurexin-2-alpha precursor                                            | R.TALAVDGEAR.A                          | 2 | 3.67 | 0.27 | -3.37 |
| IPI00007921 | Isoform 1 of Neurexin-2-alpha precursor                                            | R.TGSISLDFR.T                           | 2 | 2.60 | 0.24 | -1.36 |
| IPI00007921 | Isoform 1 of Neurexin-2-alpha precursor                                            | R.TTEPNGLLLFSQGR.R                      | 2 | 4.03 | 0.33 | -4.20 |
| IPI00007921 | Isoform 1 of Neurexin-2-alpha precursor                                            | R.TTEPNGLLLFSQGR.R                      | 3 | 2.20 | 0.13 | -2.83 |
| IPI00007921 | Isoform 1 of Neurexin-2-alpha precursor                                            | R.VDLPLPPEVWTAALR.A                     | 2 | 3.51 | 0.41 | -5.42 |
| IPI00007921 | Isoform 1 of Neurexin-2-alpha precursor                                            | R.VVDEWLLDKGR.Q                         | 3 | 1.39 | 0.17 | -1.81 |
| IPI00007921 | Isoform 1 of Neurexin-2-alpha precursor                                            | R.WAGAASSGELSFSLR.T                     | 2 | 3.07 | 0.21 | -7.41 |
| IPI00007921 | Isoform 1 of Neurexin-2-alpha precursor                                            | R.YPAGNFDNER.L                          | 2 | 3.12 | 0.31 | -1.90 |
| IPI00007928 | Pre-mRNA-processing-splicing factor 8                                              | R.DIILGM*EISAPSQQRQQIAEIEK.Q            | 3 | 3.19 | 0.10 |       |
| IPI00007960 | Isoform 1 of Periostin precursor                                                   | K.DIVTNGVVIHLIDQVLIPDSAK.Q              | 3 | 3.13 | 0.24 | -5.34 |
| IPI00007960 | Isoform 1 of Periostin precursor                                                   | R.AAITSDILEALGR.D                       | 2 | 4.16 | 0.44 | -3.09 |
| IPI00007960 | Isoform 1 of Periostin precursor                                                   | R.VLTQIGTSIQDFIEAEDDLSSFR.A             | 3 | 3.41 | 0.38 | -3.42 |
| IPI00008085 | Zinc transporter ZIP10 precursor                                                   | K.LLTNLGLGER.K                          | 2 | 2.94 | 0.28 | -1.63 |
| IPI00008085 | Zinc transporter ZIP10 precursor                                                   | R.GHQDLDPDNEGELR.H                      | 3 | 3.63 | 0.25 | -0.13 |
| IPI00008087 | Follistatin-related protein 5 precursor                                            | K.DKFIYVAQPTLDR.V                       | 3 | 2.72 | 0.13 | -0.79 |
| IPI00008087 | Follistatin-related protein 5 precursor                                            | K.NGIDITPK.L                            | 2 | 2.35 | 0.26 | -3.65 |
| IPI00008087 | Follistatin-related protein 5 precursor                                            | K.TLANILWR.E                            | 2 | 2.99 | 0.14 |       |
| IPI00008087 | Follistatin-related protein 5 precursor                                            | K.VIQPIECEFQR.H                         | 2 | 2.50 | 0.28 | -2.87 |
| IPI00008087 | Follistatin-related protein 5 precursor                                            | K.VVQAVSTDPVPVK.L                       | 2 | 3.47 | 0.45 | -3.41 |
| IPI00008087 | Follistatin-related protein 5 precursor                                            | K.YIM*QENENPNGDDISR.K                   | 2 | 5.31 | 0.50 | -3.36 |
| IPI00008087 | Follistatin-related protein 5 precursor                                            | R.QIQDSSLFGQYLM*TPSKDSLFLDGR.L          | 3 | 4.49 | 0.47 | -2.28 |
| IPI00008087 | Follistatin-related protein 5 precursor                                            | R.VLIVDVQSQK.V                          | 2 | 3.02 | 0.12 | -3.26 |
| IPI00008087 | Follistatin-related protein 5 precursor                                            | R.YEDTGAYTCIAK.N                        | 2 | 4.05 | 0.39 |       |
| IPI00008091 | Putative DNA helicase INO80 complex homolog 1                                      | K.RDMGHDGIQEEILR.K                      | 3 | 2.22 | 0.17 | 1.77  |
| IPI00008107 | Leucine-rich repeat and fibronectin type-III domain-containing protein 2 precursor | K.AIGDPSPLIHVVAPDDR.L                   | 3 | 2.32 | 0.21 | -1.74 |
| IPI00008107 | Leucine-rich repeat and fibronectin type-III domain-containing protein 2 precursor | R.M*VNLHQLSLDHNLDDHIAEGTFADLQK.L        | 4 | 3.19 | 0.11 | -4.43 |
| IPI00008107 | Leucine-rich repeat and fibronectin type-III domain-containing protein 2 precursor | R.NTISHIQPFSLDLESLR.S                   | 3 | 4.48 | 0.40 | -1.33 |
| IPI00008107 | Leucine-rich repeat and fibronectin type-III domain-containing protein 2 precursor | R.SLHLSNRLPSLGEDTLR.G                   | 3 | 3.84 | 0.41 | -2.94 |
| IPI00008148 | Isoform 1 of GDNF family receptor alpha-1 precursor                                | K.EGLGASSHITTK.S                        | 2 | 2.46 | 0.27 | -2.42 |
| IPI00008148 | Isoform 1 of GDNF family receptor alpha-1 precursor                                | R.SAYITPCTTSVSNVNCNR.R                  | 2 | 1.81 | 0.06 | -2.92 |
| IPI00008164 | Prolyl endopeptidase                                                               | R.VFLDPNLSDDGTVALR.G                    | 2 | 4.28 | 0.39 | -4.82 |
| IPI00008164 | Prolyl endopeptidase                                                               | R.YFYFYNTGLQNQR.V                       | 2 | 4.59 | 0.48 | -2.64 |
| IPI00008202 | Headcase protein homolog                                                           | R.LDLSSELLTHIPRHLNTHFVRMEDDAQVGQGEDLR.K | 6 | 2.95 | 0.19 | 1.39  |
| IPI00008202 | Headcase protein homolog                                                           | R.WDGSWHQLGTMITYDILAASPCQARLNCK.H       | 3 | 2.73 | 0.05 | 0.01  |

|             |                                                                                        |                              |   |      |      |       |
|-------------|----------------------------------------------------------------------------------------|------------------------------|---|------|------|-------|
| IPI00008207 | Endoplasmic reticulum mannosyl-oligosaccharide 1,2-alpha-mannosidase                   | K.IPYSDVNIGTGVAHPPR.W        | 3 | 3.74 | 0.40 | -2.39 |
| IPI00008207 | Endoplasmic reticulum mannosyl-oligosaccharide 1,2-alpha-mannosidase                   | K.YQDWGWELQSF.SR.F           | 2 | 4.71 | 0.49 | -4.77 |
| IPI00008207 | Endoplasmic reticulum mannosyl-oligosaccharide 1,2-alpha-mannosidase                   | K.YQDWGWELQSF.SR.F           | 3 | 3.78 | 0.30 | -4.36 |
| IPI00008207 | Endoplasmic reticulum mannosyl-oligosaccharide 1,2-alpha-mannosidase                   | R.DKM*ESFFLGETLK.Y           | 2 | 3.26 | 0.31 | -2.81 |
| IPI00008207 | Endoplasmic reticulum mannosyl-oligosaccharide 1,2-alpha-mannosidase                   | R.DKM*ESFFLGETLK.Y           | 3 | 3.31 | 0.25 | -0.06 |
| IPI00008207 | Endoplasmic reticulum mannosyl-oligosaccharide 1,2-alpha-mannosidase                   | R.FTRVPSGGYSSINNVQDPQKPEPR.D | 3 | 5.08 | 0.44 | -3.60 |
| IPI00008207 | Endoplasmic reticulum mannosyl-oligosaccharide 1,2-alpha-mannosidase                   | R.TPSKIPYSDVNIGTGVAHPPR.W    | 4 | 4.30 | 0.44 | -2.64 |
| IPI00008207 | Endoplasmic reticulum mannosyl-oligosaccharide 1,2-alpha-mannosidase                   | R.VPSGGYSSINNVQDPQKPEPR.D    | 3 | 3.17 | 0.36 | -2.07 |
| IPI00008215 | NADP-dependent malic enzyme                                                            | K.AIVVTDGER.I                | 2 | 2.25 | 0.12 | -2.83 |
| IPI00008215 | NADP-dependent malic enzyme                                                            | K.DM*AAFNERPIIFALS.NPTS.K.A  | 3 | 4.16 | 0.34 | -3.99 |
| IPI00008215 | NADP-dependent malic enzyme                                                            | K.TATVYPEQNK.E               | 2 | 2.74 | 0.25 | -3.51 |
| IPI00008215 | NADP-dependent malic enzyme                                                            | R.QITDNIFLTTAEVIAQQVSDK.H    | 3 | 4.33 | 0.42 | -4.41 |
| IPI00008215 | NADP-dependent malic enzyme                                                            | R.QQLNIHGLLPSPFNSQEIQVLR.V   | 3 | 3.63 | 0.23 | -1.63 |
| IPI00008223 | UV excision repair protein RAD23 homolog B                                             | K.EKIESEKGDAPFVAGQK.L        | 3 | 2.97 | 0.29 | -3.26 |
| IPI00008223 | UV excision repair protein RAD23 homolog B                                             | K.IESEKGDAPFVAGQK.L          | 3 | 2.76 | 0.10 | -5.74 |
| IPI00008223 | UV excision repair protein RAD23 homolog B                                             | K.TLQQQTFK.I                 | 2 | 2.49 | 0.13 | -1.19 |
| IPI00008223 | UV excision repair protein RAD23 homolog B                                             | R.QIIQQNPSLLPALLQQIGR.E      | 3 | 3.72 | 0.27 | -3.68 |
| IPI00008226 | 73 kDa protein                                                                         | K.EEDEDYPSIEDIEGEDQEDK.E     | 2 | 2.47 | 0.17 |       |
| IPI00008274 | Adenylyl cyclase-associated protein 1                                                  | K.AGAAPYVQAFDSSLAGPVAEYLK.I  | 3 | 3.04 | 0.24 | -4.45 |
| IPI00008282 | Isoform 1 of Calcium/calmodulin-dependent 3',5'-cyclic nucleotide phosphodiesterase 1A | K.TMSLILHAADISHPAK.S         | 2 | 2.34 | 0.14 |       |
| IPI00008290 | Isoform 1 of Ephrin type-A receptor 5 precursor                                        | A.SPSNEVNLLDSR.T             | 1 | 2.61 | 0.26 | -1.80 |
| IPI00008290 | Isoform 1 of Ephrin type-A receptor 5 precursor                                        | A.SPSNEVNLLDSR.T             | 2 | 3.84 | 0.40 | -3.11 |
| IPI00008290 | Isoform 1 of Ephrin type-A receptor 5 precursor                                        | K.ETFNM*YYFESDDQNGR.N        | 2 | 4.73 | 0.56 | -4.14 |
| IPI00008290 | Isoform 1 of Ephrin type-A receptor 5 precursor                                        | K.IDTIAADESFTELDLGDR.V       | 2 | 6.01 | 0.59 | -4.69 |
| IPI00008290 | Isoform 1 of Ephrin type-A receptor 5 precursor                                        | K.NGWEEIGEVDENYAPIHTYQVCK.V  | 2 | 4.76 | 0.58 | -0.77 |
| IPI00008290 | Isoform 1 of Ephrin type-A receptor 5 precursor                                        | K.NGWEEIGEVDENYAPIHTYQVCK.V  | 3 | 4.41 | 0.37 | -2.43 |
| IPI00008290 | Isoform 1 of Ephrin type-A receptor 5 precursor                                        | K.VM*EQNQNNWLLTSWISNEGASR.I  | 2 | 5.20 | 0.50 | -5.89 |
| IPI00008290 | Isoform 1 of Ephrin type-A receptor 5 precursor                                        | R.DVGPLSK.K                  | 1 | 1.71 | 0.11 | -4.19 |
| IPI00008290 | Isoform 1 of Ephrin type-A receptor 5 precursor                                        | R.NIKENQYIK.I                | 2 | 2.63 | 0.16 | -3.63 |
| IPI00008290 | Isoform 1 of Ephrin type-A receptor 5 precursor                                        | R.TVM*GDLGWIAFPK.N           | 1 | 1.40 | 0.09 | -4.50 |
| IPI00008290 | Isoform 1 of Ephrin type-A receptor 5 precursor                                        | R.TVM*GDLGWIAFPK.N           | 2 | 3.97 | 0.30 | -4.34 |
| IPI00008290 | Isoform 1 of Ephrin type-A receptor 5 precursor                                        | R.TVM*GDLGWIAFPK.N           | 3 | 3.91 | 0.16 | -2.79 |



|             |                                                                                           |                                      |   |      |      |       |
|-------------|-------------------------------------------------------------------------------------------|--------------------------------------|---|------|------|-------|
| IPI00008303 | Isoform 1 of N-acetylglucosamine-1-phosphodiester alpha-N-acetylglucosaminidase precursor | R.VSSSGGLQNAQFGIR.R                  | 2 | 3.72 | 0.38 | -1.42 |
| IPI00008315 | Isoform 1 of Ephrin type-B receptor 1 precursor                                           | R.TVAGYGKFSGKMCFQTLTDDDYK.S          | 2 | 1.64 | 0.12 | 2.31  |
| IPI00008318 | Ephrin type-A receptor 4 precursor                                                        | K.ALSTDATCAK.C                       | 1 | 2.09 | 0.34 | -4.71 |
| IPI00008318 | Ephrin type-A receptor 4 precursor                                                        | K.ALSTDATCAK.C                       | 2 | 2.67 | 0.31 | -3.95 |
| IPI00008318 | Ephrin type-A receptor 4 precursor                                                        | K.CPPHSYSVWEGATSCTCDR.G              | 3 | 4.46 | 0.29 | -2.98 |
| IPI00008318 | Ephrin type-A receptor 4 precursor                                                        | K.ETFNLYYYESDNDKER.F                 | 2 | 4.56 | 0.50 | -3.62 |
| IPI00008318 | Ephrin type-A receptor 4 precursor                                                        | K.ETFNLYYYESDNDKER.F                 | 3 | 2.48 | 0.15 | -2.79 |
| IPI00008318 | Ephrin type-A receptor 4 precursor                                                        | K.GLNPLTSYVFHVR.A                    | 2 | 4.09 | 0.48 | -4.50 |
| IPI00008318 | Ephrin type-A receptor 4 precursor                                                        | K.GLNPLTSYVFHVR.A                    | 3 | 2.60 | 0.26 | -2.11 |
| IPI00008318 | Ephrin type-A receptor 4 precursor                                                        | K.IDTIAADESFTQVDIGDR.I               | 2 | 6.17 | 0.50 | -7.85 |
| IPI00008318 | Ephrin type-A receptor 4 precursor                                                        | K.IDTIAADESFTQVDIGDR.I               | 3 | 5.61 | 0.34 | -3.67 |
| IPI00008318 | Ephrin type-A receptor 4 precursor                                                        | K.LNTEIRDVGPLSK.K                    | 2 | 3.55 | 0.29 | -3.31 |
| IPI00008318 | Ephrin type-A receptor 4 precursor                                                        | K.LNTEIRDVGPLSKK.G                   | 2 | 3.84 | 0.32 | -3.33 |
| IPI00008318 | Ephrin type-A receptor 4 precursor                                                        | K.LNTEIRDVGPLSKK.G                   | 3 | 3.44 | 0.33 | 0.06  |
| IPI00008318 | Ephrin type-A receptor 4 precursor                                                        | K.M*YCGADGEWLVPIGNCLCNAGHEER.S       | 3 | 5.23 | 0.57 | -3.74 |
| IPI00008318 | Ephrin type-A receptor 4 precursor                                                        | K.YNPNPDQSVSVTVTTNQAAPSSIALVQAK.E    | 2 | 4.69 | 0.60 | -4.53 |
| IPI00008318 | Ephrin type-A receptor 4 precursor                                                        | K.YNPNPDQSVSVTVTTNQAAPSSIALVQAK.E    | 3 | 6.35 | 0.54 | -5.08 |
| IPI00008318 | Ephrin type-A receptor 4 precursor                                                        | K.YYEKQNER.S                         | 1 | 1.61 | 0.18 | -3.49 |
| IPI00008318 | Ephrin type-A receptor 4 precursor                                                        | K.YYEKQNER.S                         | 2 | 2.91 | 0.31 | -3.04 |
| IPI00008318 | Ephrin type-A receptor 4 precursor                                                        | K.YYEKQNER.S                         | 3 | 1.78 | 0.19 | -4.84 |
| IPI00008318 | Ephrin type-A receptor 4 precursor                                                        | L.NPLTSYVFHVR.A                      | 2 | 3.28 | 0.46 | -2.61 |
| IPI00008318 | Ephrin type-A receptor 4 precursor                                                        | R.DCNLPGVM*GTCK.E                    | 2 | 3.95 | 0.28 | -3.54 |
| IPI00008318 | Ephrin type-A receptor 4 precursor                                                        | R.DVGPLSK.K                          | 1 | 1.71 | 0.11 | -4.19 |
| IPI00008318 | Ephrin type-A receptor 4 precursor                                                        | R.FIRENQFVK.I                        | 1 | 2.30 | 0.21 | -4.43 |
| IPI00008318 | Ephrin type-A receptor 4 precursor                                                        | R.FIRENQFVK.I                        | 2 | 2.20 | 0.15 | -3.41 |
| IPI00008318 | Ephrin type-A receptor 4 precursor                                                        | R.NLAQFPDTITGADTSSLVEVR.G            | 2 | 6.59 | 0.58 | -3.78 |
| IPI00008318 | Ephrin type-A receptor 4 precursor                                                        | R.NLAQFPDTITGADTSSLVEVR.G            | 3 | 4.77 | 0.41 | -3.39 |
| IPI00008318 | Ephrin type-A receptor 4 precursor                                                        | R.NTDIKGLNPLTSYVFHVR.A               | 2 | 4.67 | 0.53 | -4.18 |
| IPI00008318 | Ephrin type-A receptor 4 precursor                                                        | R.NTDIKGLNPLTSYVFHVR.A               | 3 | 4.98 | 0.49 | -3.12 |
| IPI00008318 | Ephrin type-A receptor 4 precursor                                                        | R.NTDIKGLNPLTSYVFHVR.A               | 4 | 4.04 | 0.38 | -3.04 |
| IPI00008318 | Ephrin type-A receptor 4 precursor                                                        | R.QDISYNVVCK.K                       | 2 | 2.32 | 0.08 | -3.56 |
| IPI00008318 | Ephrin type-A receptor 4 precursor                                                        | R.QDISYNVVCKK.C                      | 2 | 2.18 | 0.09 | -3.43 |
| IPI00008318 | Ephrin type-A receptor 4 precursor                                                        | R.SVQGELGWIASPLEGGWEEVSIM*DEK.N      | 2 | 4.65 | 0.44 | -4.11 |
| IPI00008318 | Ephrin type-A receptor 4 precursor                                                        | R.SVQGELGWIASPLEGGWEEVSIM*DEK.N      | 3 | 4.58 | 0.55 | -3.52 |
| IPI00008318 | Ephrin type-A receptor 4 precursor                                                        | R.SVQGELGWIASPLEGGWEEVSIM*DEKNTPIR.T | 3 | 4.04 | 0.30 | -4.18 |
| IPI00008318 | Ephrin type-A receptor 4 precursor                                                        | R.TAAGYGFSEPLEVTNTVPSR.I             | 2 | 5.24 | 0.36 | -2.46 |
| IPI00008318 | Ephrin type-A receptor 4 precursor                                                        | R.VYPANEVTLLEDSR.S                   | 1 | 1.91 | 0.37 | -3.94 |
| IPI00008318 | Ephrin type-A receptor 4 precursor                                                        | R.VYPANEVTLLEDSR.S                   | 2 | 4.23 | 0.34 | -4.00 |
| IPI00008318 | Ephrin type-A receptor 4 precursor                                                        | R.YSVALAWLEPDRPNGVILEYEVK.Y          | 3 | 2.50 | 0.10 | 0.42  |

|             |                                                                                                                           |                                    |   |      |      |       |
|-------------|---------------------------------------------------------------------------------------------------------------------------|------------------------------------|---|------|------|-------|
| IPI00008404 | Isoform Long of Segment polarity protein dishevelled homolog DVL-1-like                                                   | R.IEPGDM*LLQVNDVNFENMSNDDAVRVL.R.E | 3 | 2.71 | 0.05 | -1.14 |
| IPI00008422 | Isoform 2 of SWI/SNF-related matrix-associated actin-dependent regulator of chromatin subfamily A containing DEAD/H box 1 | K.LIESTSTMDGAIAAALLMFGDAGGGPR.K    | 3 | 3.34 | 0.06 |       |
| IPI00008433 | 40S ribosomal protein S5                                                                                                  | R.LTNSM*M*MHGRNNGK.K               | 2 | 2.19 | 0.11 | 2.37  |
| IPI00008438 | 40S ribosomal protein S10                                                                                                 | R.IAIYELFK.E                       | 2 | 3.09 | 0.25 | -2.53 |
| IPI00008494 | Intercellular adhesion molecule 1 precursor                                                                               | K.ASVSVTAEDEGTQR.L                 | 2 | 2.64 | 0.17 | -2.22 |
| IPI00008494 | Intercellular adhesion molecule 1 precursor                                                                               | K.LLGIETPLPK.K                     | 2 | 1.88 | 0.14 | 0.41  |
| IPI00008494 | Intercellular adhesion molecule 1 precursor                                                                               | K.VTLNGVPAQPLGPR.A                 | 2 | 2.69 | 0.25 | -2.81 |
| IPI00008494 | Intercellular adhesion molecule 1 precursor                                                                               | R.DLEGTYLCR.A                      | 2 | 2.45 | 0.42 | -2.13 |
| IPI00008497 | Ornithine decarboxylase                                                                                                   | K.CNDSKAIVKTLAATGTGFDCASK.T        | 2 | 1.42 | 0.05 | -7.34 |
| IPI00008504 | Carbonic anhydrase 14 precursor                                                                                           | K.LQGTLFSTEEEPSK.L                 | 2 | 4.58 | 0.50 | -4.08 |
| IPI00008504 | Carbonic anhydrase 14 precursor                                                                                           | R.SQISM*EQLEK.L                    | 2 | 2.93 | 0.25 | -1.94 |
| IPI00008533 | Isoform Long of Matrix metalloproteinase-17 precursor                                                                     | R.AEDLSLGVWLSR.F                   | 2 | 2.75 | 0.28 |       |
| IPI00008533 | Isoform Long of Matrix metalloproteinase-17 precursor                                                                     | R.FGYLPPADPTTGQLQTQEELSK.A         | 2 | 3.52 | 0.44 | -3.90 |
| IPI00008533 | Isoform Long of Matrix metalloproteinase-17 precursor                                                                     | R.FGYLPPADPTTGQLQTQEELSK.A         | 3 | 3.86 | 0.20 | -3.74 |
| IPI00008533 | Isoform Long of Matrix metalloproteinase-17 precursor                                                                     | R.WSDGASYFFR.G                     | 2 | 3.41 | 0.36 | -3.17 |
| IPI00008556 | Isoform 1 of Coagulation factor XI precursor                                                                              | K.DSVTETLPR.V                      | 2 | 2.52 | 0.13 | -1.85 |
| IPI00008556 | Isoform 1 of Coagulation factor XI precursor                                                                              | K.TSEGLPSTR.I                      | 2 | 2.54 | 0.24 | -0.52 |
| IPI00008556 | Isoform 1 of Coagulation factor XI precursor                                                                              | R.GGISGYTLR.L                      | 2 | 2.21 | 0.14 | -1.57 |
| IPI00008580 | Antileukoproteinase precursor                                                                                             | K.CLDPVDTPNPTR.R                   | 2 | 3.86 | 0.23 |       |
| IPI00008586 | Isoform 1 of Chondroitin sulfate proteoglycan 5 precursor                                                                 | P.AREAGSAVEAEELVK.G                | 2 | 3.90 | 0.17 | -3.84 |
| IPI00008586 | Isoform 1 of Chondroitin sulfate proteoglycan 5 precursor                                                                 | R.EAGSAVEAEELVK.G                  | 1 | 3.37 | 0.22 | -3.88 |
| IPI00008586 | Isoform 1 of Chondroitin sulfate proteoglycan 5 precursor                                                                 | R.EAGSAVEAEELVK.G                  | 2 | 3.78 | 0.38 | -5.56 |
| IPI00008603 | Actin, aortic smooth muscle                                                                                               | K.AGFAGDDAPR.A                     | 1 | 2.25 | 0.23 | -4.33 |
| IPI00008603 | Actin, aortic smooth muscle                                                                                               | K.AGFAGDDAPR.A                     | 2 | 3.47 | 0.32 | -3.15 |
| IPI00008603 | Actin, aortic smooth muscle                                                                                               | K.DSYVGDEAQS.K.R                   | 2 | 3.42 | 0.43 | -3.44 |
| IPI00008603 | Actin, aortic smooth muscle                                                                                               | K.DSYVGDEAQS.K.R.G                 | 2 | 3.20 | 0.47 | -2.81 |
| IPI00008603 | Actin, aortic smooth muscle                                                                                               | K.EITALAPSTM*K.I                   | 1 | 2.16 | 0.28 | -3.20 |
| IPI00008603 | Actin, aortic smooth muscle                                                                                               | K.EITALAPSTM*K.I                   | 2 | 3.01 | 0.23 | -2.30 |
| IPI00008603 | Actin, aortic smooth muscle                                                                                               | K.EITALAPSTM.K.I                   | 2 | 2.64 | 0.15 | -3.46 |
| IPI00008603 | Actin, aortic smooth muscle                                                                                               | K.IIAPPERK.Y                       | 2 | 1.97 | 0.05 | -3.56 |
| IPI00008603 | Actin, aortic smooth muscle                                                                                               | K.IKIIAPPER.K                      | 2 | 2.50 | 0.12 | 2.48  |
| IPI00008603 | Actin, aortic smooth muscle                                                                                               | K.IKIIAPPERK.Y                     | 2 | 2.55 | 0.12 | -3.24 |

|             |                                                                            |                              |   |      |      |       |
|-------------|----------------------------------------------------------------------------|------------------------------|---|------|------|-------|
| IPI00008603 | Actin, aortic smooth muscle                                                | K.YSVWIGGSILASLSTFQQMWISK.Q  | 2 | 1.77 | 0.24 | -2.29 |
| IPI00008603 | Actin, aortic smooth muscle                                                | R.AVFPSIVGRPR.H              | 2 | 3.03 | 0.29 | -3.27 |
| IPI00008603 | Actin, aortic smooth muscle                                                | R.DLTDYLM*K.I                | 1 | 2.48 | 0.24 | -3.46 |
| IPI00008603 | Actin, aortic smooth muscle                                                | R.DLTDYLM*K.I                | 2 | 2.37 | 0.25 | -3.00 |
| IPI00008603 | Actin, aortic smooth muscle                                                | R.GYSFVTTAER.E               | 2 | 3.32 | 0.42 | -2.19 |
| IPI00008603 | Actin, aortic smooth muscle                                                | R.HQGVM*VGM*GQK.D            | 2 | 2.78 | 0.19 |       |
| IPI00008603 | Actin, aortic smooth muscle                                                | R.LDLAGRDLTDYLM*K.I          | 2 | 2.69 | 0.21 | -4.38 |
| IPI00008603 | Actin, aortic smooth muscle                                                | R.LDLAGRDLTDYLM*K.I          | 3 | 3.36 | 0.32 | -1.97 |
| IPI00008603 | Actin, aortic smooth muscle                                                | R.M*QKEITALAPSTM*K.I         | 2 | 3.78 | 0.31 | -4.87 |
| IPI00008603 | Actin, aortic smooth muscle                                                | R.SYELPDGQVITIGNER.F         | 2 | 4.30 | 0.39 | -4.42 |
| IPI00008603 | Actin, aortic smooth muscle                                                | R.VAPEEHPTLLTEAPLNPK.A       | 3 | 2.86 | 0.27 | -1.37 |
| IPI00008726 | Iron-responsive element-binding protein 2                                  | K.GPYLLGVKAVLAESYEK.I        | 2 | 3.11 | 0.10 |       |
| IPI00008726 | Iron-responsive element-binding protein 2                                  | R.EFNSYGARR.G                | 1 | 2.23 | 0.09 |       |
| IPI00008756 | Isoform 1 of Bullous pemphigoid antigen 1, isoforms 1/2/3/4/5/8 (Fragment) | K.DLHSPVAGYWLTASGER.I        | 3 | 2.60 | 0.08 | -5.48 |
| IPI00008756 | Isoform 1 of Bullous pemphigoid antigen 1, isoforms 1/2/3/4/5/8 (Fragment) | K.FKQSAEEFR.K                | 2 | 2.27 | 0.14 |       |
| IPI00008780 | Stanniocalcin-2 precursor                                                  | G.TDATNPPEGQDR.S             | 2 | 2.90 | 0.20 | -3.89 |
| IPI00008780 | Stanniocalcin-2 precursor                                                  | K.DLLLHEPYVDLVNLLTTCGEEVK.E  | 3 | 3.73 | 0.21 | -3.76 |
| IPI00008780 | Stanniocalcin-2 precursor                                                  | K.SFIKDALK.C                 | 1 | 1.96 | 0.10 | -3.39 |
| IPI00008780 | Stanniocalcin-2 precursor                                                  | K.SFIKDALK.C                 | 2 | 2.23 | 0.08 | -1.86 |
| IPI00008780 | Stanniocalcin-2 precursor                                                  | R.EM*VSQLQR.E                | 2 | 2.19 | 0.12 | 0.80  |
| IPI00008780 | Stanniocalcin-2 precursor                                                  | R.VIVEM*IHFK.D               | 2 | 2.59 | 0.36 | -2.92 |
| IPI00008787 | Alpha-N-acetylglucosaminidase precursor                                    | K.NVFQLEQAFVLSK.Q            | 2 | 4.72 | 0.44 | -5.03 |
| IPI00008787 | Alpha-N-acetylglucosaminidase precursor                                    | K.QLAGLVANYTTPR.W            | 2 | 2.60 | 0.27 | -1.28 |
| IPI00008787 | Alpha-N-acetylglucosaminidase precursor                                    | R.AAAVSEAEADFYEQNSR.Y        | 2 | 5.23 | 0.54 | -2.08 |
| IPI00008787 | Alpha-N-acetylglucosaminidase precursor                                    | R.AAAVSEAEADFYEQNSR.Y        | 3 | 4.55 | 0.46 | -1.83 |
| IPI00008787 | Alpha-N-acetylglucosaminidase precursor                                    | R.AGGVLAYELLPALDEVLASDSR.F   | 2 | 5.99 | 0.52 | -4.43 |
| IPI00008787 | Alpha-N-acetylglucosaminidase precursor                                    | R.AGGVLAYELLPALDEVLASDSR.F   | 3 | 4.55 | 0.51 | -4.79 |
| IPI00008787 | Alpha-N-acetylglucosaminidase precursor                                    | R.FLLGSWLEQAR.A              | 2 | 3.53 | 0.33 | -3.93 |
| IPI00008787 | Alpha-N-acetylglucosaminidase precursor                                    | R.GDTVDLAKK.I                | 2 | 2.76 | 0.16 | -2.45 |
| IPI00008787 | Alpha-N-acetylglucosaminidase precursor                                    | R.GSTGVAAAAGLHR.Y            | 2 | 3.06 | 0.36 | -3.28 |
| IPI00008787 | Alpha-N-acetylglucosaminidase precursor                                    | R.KDPVPDLAAWVTSFAAR.R        | 3 | 2.78 | 0.26 | -2.60 |
| IPI00008787 | Alpha-N-acetylglucosaminidase precursor                                    | R.LFLEALVDSVAQGIPFQQHQFDK.N  | 3 | 4.52 | 0.36 | -4.14 |
| IPI00008787 | Alpha-N-acetylglucosaminidase precursor                                    | R.LLLTSAPSLATSPAFR.Y         | 2 | 4.27 | 0.53 | -4.92 |
| IPI00008787 | Alpha-N-acetylglucosaminidase precursor                                    | R.LLLTSAPSLATSPAFRYDLLDLTR.Q | 3 | 2.63 | 0.23 | -3.94 |
| IPI00008787 | Alpha-N-acetylglucosaminidase precursor                                    | R.LLVLDLFAESQPVYTR.T         | 2 | 4.29 | 0.41 | -4.26 |
| IPI00008787 | Alpha-N-acetylglucosaminidase precursor                                    | R.LLVLDLFAESQPVYTR.T         | 3 | 2.81 | 0.21 | -2.51 |
| IPI00008787 | Alpha-N-acetylglucosaminidase precursor                                    | R.LPRPLPAVPGELTEATPNRYR.Y    | 3 | 3.29 | 0.36 | -1.58 |
| IPI00008787 | Alpha-N-acetylglucosaminidase precursor                                    | R.QAVQELVSLYYEEAR.S          | 2 | 5.20 | 0.50 | -5.36 |
| IPI00008787 | Alpha-N-acetylglucosaminidase precursor                                    | R.SFGM*TPVLPAFAGHVPEAVTR.V   | 2 | 3.69 | 0.44 | -3.82 |
| IPI00008787 | Alpha-N-acetylglucosaminidase precursor                                    | R.SFGM*TPVLPAFAGHVPEAVTR.V   | 3 | 3.02 | 0.37 | -3.46 |

|             |                                                   |                                             |   |      |      |       |
|-------------|---------------------------------------------------|---------------------------------------------|---|------|------|-------|
| IPI00008787 | Alpha-N-acetylglucosaminidase precursor           | R.YDLLDLTR.Q                                | 2 | 2.37 | 0.16 | -1.83 |
| IPI00008787 | Alpha-N-acetylglucosaminidase precursor           | R.YQLTLWGPEGNILDYANK.Q                      | 2 | 4.32 | 0.46 | -3.22 |
| IPI00008894 | Carboxypeptidase A4 precursor                     | K.FFGDQVLR.I                                | 2 | 2.56 | 0.23 | -0.47 |
| IPI00008905 | UDP-glucuronosyltransferase 2B15 precursor        | K.NGGGFLFPPSYVPVVMSELSQMIFMERIK.N           | 4 | 2.92 | 0.20 | 0.56  |
| IPI00008944 | Isoform 1 of Neuroendocrine protein 7B2 precursor | D.FSEDQGYDPPNCPVVGK.T                       | 2 | 4.38 | 0.49 | -4.88 |
| IPI00008944 | Isoform 1 of Neuroendocrine protein 7B2 precursor | F.SEDQGYDPPNCPVVGK.T                        | 2 | 3.61 | 0.46 | -4.20 |
| IPI00008944 | Isoform 1 of Neuroendocrine protein 7B2 precursor | K.DFSEDQGYDPPNCPVVGK.T                      | 2 | 4.45 | 0.47 |       |
| IPI00008944 | Isoform 1 of Neuroendocrine protein 7B2 precursor | K.KSVPHFSDEDKDPE.-                          | 2 | 4.03 | 0.41 | -4.87 |
| IPI00008944 | Isoform 1 of Neuroendocrine protein 7B2 precursor | K.KSVPHFSDEDKDPE.-                          | 3 | 3.68 | 0.39 | -5.14 |
| IPI00008944 | Isoform 1 of Neuroendocrine protein 7B2 precursor | K.SVPHFSDEDKDPE.-                           | 1 | 2.81 | 0.21 | -2.39 |
| IPI00008944 | Isoform 1 of Neuroendocrine protein 7B2 precursor | K.SVPHFSDEDKDPE.-                           | 2 | 3.48 | 0.41 | -4.42 |
| IPI00008944 | Isoform 1 of Neuroendocrine protein 7B2 precursor | K.SVPHFSDEDKDPE.-                           | 3 | 1.76 | 0.27 | -2.11 |
| IPI00008944 | Isoform 1 of Neuroendocrine protein 7B2 precursor | K.TADDGCLENTPDIAEFSR.E                      | 2 | 6.42 | 0.62 | -3.97 |
| IPI00008944 | Isoform 1 of Neuroendocrine protein 7B2 precursor | N.LVG PQSIEGGAHEGLQHLGPFGNIPNIVAELTGDNIPK.D | 3 | 5.93 | 0.50 | -3.80 |
| IPI00008944 | Isoform 1 of Neuroendocrine protein 7B2 precursor | R.EFQLHQHLFDPEHDYPGLGK.W                    | 2 | 4.98 | 0.52 | -4.38 |
| IPI00008944 | Isoform 1 of Neuroendocrine protein 7B2 precursor | R.EFQLHQHLFDPEHDYPGLGK.W                    | 3 | 5.07 | 0.50 | -6.23 |
| IPI00008944 | Isoform 1 of Neuroendocrine protein 7B2 precursor | R.LDNVVAK.K                                 | 1 | 2.32 | 0.08 | -3.41 |
| IPI00008944 | Isoform 1 of Neuroendocrine protein 7B2 precursor | R.LDNVVAK.S                                 | 2 | 2.32 | 0.05 | -3.22 |
| IPI00008944 | Isoform 1 of Neuroendocrine protein 7B2 precursor | R.SVNPYLQGQR.L                              | 1 | 2.02 | 0.13 | -2.08 |
| IPI00008944 | Isoform 1 of Neuroendocrine protein 7B2 precursor | R.SVNPYLQGQR.L                              | 2 | 3.19 | 0.31 | -2.40 |
| IPI00008944 | Isoform 1 of Neuroendocrine protein 7B2 precursor | R.SVNPYLQGQR.LDNVVAK.K                      | 2 | 3.52 | 0.25 | -2.23 |
| IPI00008944 | Isoform 1 of Neuroendocrine protein 7B2 precursor | R.SVNPYLQGQR.LDNVVAK.K                      | 3 | 2.63 | 0.37 | -1.06 |
| IPI00008944 | Isoform 1 of Neuroendocrine protein 7B2 precursor | R.SVNPYLQGQR.LDNVVAK.S                      | 2 | 3.69 | 0.33 | -3.68 |

|             |                                                    |                                       |   |      |      |       |
|-------------|----------------------------------------------------|---------------------------------------|---|------|------|-------|
| IPI00008944 | Isoform 1 of Neuroendocrine protein 7B2 precursor  | R.SVNPYLQGQRLDNVVAKK.S                | 3 | 2.39 | 0.14 | -1.79 |
| IPI00008944 | Isoform 1 of Neuroendocrine protein 7B2 precursor  | R.TPDRVSEADIQR.L                      | 2 | 2.22 | 0.05 | -1.62 |
| IPI00008944 | Isoform 1 of Neuroendocrine protein 7B2 precursor  | R.TPDRVSEADIQR.L                      | 3 | 4.14 | 0.23 |       |
| IPI00008944 | Isoform 1 of Neuroendocrine protein 7B2 precursor  | R.VSEADIQR.L                          | 1 | 1.68 | 0.10 | -2.72 |
| IPI00008944 | Isoform 1 of Neuroendocrine protein 7B2 precursor  | R.VSEADIQR.L                          | 2 | 2.84 | 0.17 | -3.09 |
| IPI00008944 | Isoform 1 of Neuroendocrine protein 7B2 precursor  | S.IEGGAHEGLQHLGPFNGIPNIVAELTGDNIPK.D  | 3 | 6.82 | 0.56 | -4.41 |
| IPI00008994 | Isoform 1 of Protein NDRG2                         | K.LDPTQTSFLK.M                        | 2 | 2.53 | 0.40 | -2.52 |
| IPI00008994 | Isoform 1 of Protein NDRG2                         | K.LTGLTSSIPEM*ILGHLFSEQEELSGNSELIQK.Y | 3 | 5.78 | 0.53 | -4.50 |
| IPI00008994 | Isoform 1 of Protein NDRG2                         | K.LTGLTSSIPEM*ILGHLFSEQEELSGNSELIQK.Y | 4 | 3.82 | 0.22 | -4.28 |
| IPI00008994 | Isoform 1 of Protein NDRG2                         | K.M*ADSGGQPQLTQPGK.L                  | 2 | 3.94 | 0.46 | -6.01 |
| IPI00008994 | Isoform 1 of Protein NDRG2                         | K.M*ADSGGQPQLTQPGKLTFAFK.Y            | 3 | 2.80 | 0.24 | 0.79  |
| IPI00008994 | Isoform 1 of Protein NDRG2                         | K.RPAILTYHDVGLNYK.S                   | 2 | 3.83 | 0.41 | -5.99 |
| IPI00008994 | Isoform 1 of Protein NDRG2                         | Q.THSVETPYGVSFTFTVYGTPKPK.R           | 3 | 4.75 | 0.53 | -3.32 |
| IPI00008994 | Isoform 1 of Protein NDRG2                         | R.CPVM*LVVGDQAPHEDAVVECNSK.L          | 3 | 4.51 | 0.46 | -1.38 |
| IPI00008994 | Isoform 1 of Protein NDRG2                         | R.NIITHAPNLDNIELYWNSYNRR.D            | 4 | 3.00 | 0.21 | -4.33 |
| IPI00008994 | Isoform 1 of Protein NDRG2                         | R.SRTASLTSAAASVDGNR.S                 | 3 | 2.71 | 0.22 | 0.65  |
| IPI00008994 | Isoform 1 of Protein NDRG2                         | R.TLSQSSESGTLSSGPPGHT.M               | 2 | 4.28 | 0.58 | -4.22 |
| IPI00008994 | Isoform 1 of Protein NDRG2                         | R.TLSQSSESGTLSSGPPGHTM*E.V            | 2 | 6.12 | 0.63 | -4.35 |
| IPI00008994 | Isoform 1 of Protein NDRG2                         | R.YALNHPDTVEGLVLINIDPNAK.G            | 2 | 5.45 | 0.49 | -3.19 |
| IPI00008994 | Isoform 1 of Protein NDRG2                         | R.YALNHPDTVEGLVLINIDPNAK.G            | 3 | 3.63 | 0.20 | -2.85 |
| IPI00008997 | WAP four-disulfide core domain protein 1 precursor | K.LYKEYPEGDSK.N                       | 2 | 2.92 | 0.25 | -2.58 |
| IPI00008997 | WAP four-disulfide core domain protein 1 precursor | K.LYKEYPEGDSKNVAEPGRGQK.H             | 3 | 4.51 | 0.40 | -3.28 |
| IPI00008997 | WAP four-disulfide core domain protein 1 precursor | K.LYKEYPEGDSKNVAEPGRGQK.H             | 4 | 3.95 | 0.35 | -4.40 |
| IPI00008997 | WAP four-disulfide core domain protein 1 precursor | K.SRAEEAGAPGGPR.Q                     | 2 | 3.54 | 0.34 | -1.86 |
| IPI00008998 | Protein tyrosine phosphatase-like protein PTPLAD1  | R.VELSDVQNPASITENVLHFK.A              | 3 | 2.84 | 0.18 | -3.29 |
| IPI00009028 | Tetranectin precursor                              | K.CFLAFTQTK.T                         | 1 | 2.54 | 0.20 | -2.76 |
| IPI00009028 | Tetranectin precursor                              | K.CFLAFTQTK.T                         | 2 | 3.20 | 0.37 | -2.45 |
| IPI00009028 | Tetranectin precursor                              | K.EQQALQTVCLK.G                       | 1 | 3.01 | 0.18 | -3.74 |
| IPI00009028 | Tetranectin precursor                              | K.EQQALQTVCLK.G                       | 2 | 3.32 | 0.37 | -3.62 |
| IPI00009028 | Tetranectin precursor                              | K.EQQALQTVCLKGTK.V                    | 2 | 2.68 | 0.25 | -2.63 |
| IPI00009028 | Tetranectin precursor                              | K.NWETEITAQPDGGK.T                    | 2 | 4.46 | 0.38 | -4.28 |

|             |                                                                          |                                      |   |      |      |       |
|-------------|--------------------------------------------------------------------------|--------------------------------------|---|------|------|-------|
| IPI00009028 | Tetranectin precursor                                                    | K.NWETEITAQPDGGKTENCAVLSGAANGK.W     | 2 | 4.07 | 0.51 | -1.51 |
| IPI00009028 | Tetranectin precursor                                                    | K.NWETEITAQPDGGKTENCAVLSGAANGK.W     | 3 | 6.12 | 0.48 | -2.48 |
| IPI00009028 | Tetranectin precursor                                                    | K.SRLDTLAQEVALLK.E                   | 2 | 4.32 | 0.30 | -4.26 |
| IPI00009028 | Tetranectin precursor                                                    | K.SRLDTLAQEVALLK.E                   | 3 | 5.44 | 0.28 | -1.98 |
| IPI00009028 | Tetranectin precursor                                                    | K.SRLDTLAQEVALLKEQQALQTVCLK.G        | 3 | 7.37 | 0.58 | -5.46 |
| IPI00009028 | Tetranectin precursor                                                    | K.SRLDTLAQEVALLKEQQALQTVCLK.G        | 4 | 3.04 | 0.12 | -4.68 |
| IPI00009028 | Tetranectin precursor                                                    | K.TENCAVLSGAANGK.W                   | 2 | 2.93 | 0.20 |       |
| IPI00009028 | Tetranectin precursor                                                    | K.TFHEASEDCISR.G                     | 2 | 4.05 | 0.45 | -4.16 |
| IPI00009028 | Tetranectin precursor                                                    | K.TFHEASEDCISR.G                     | 3 | 3.34 | 0.23 | -1.76 |
| IPI00009028 | Tetranectin precursor                                                    | R.CRDQLPYICQFGIV.-                   | 2 | 4.68 | 0.51 | -3.54 |
| IPI00009028 | Tetranectin precursor                                                    | R.DQLPYICQFGIV.-                     | 2 | 2.16 | 0.09 | -2.08 |
| IPI00009028 | Tetranectin precursor                                                    | R.GGTLSTPQTGSENDALYEYLR.Q            | 2 | 4.96 | 0.59 | -4.27 |
| IPI00009028 | Tetranectin precursor                                                    | R.GGTLSTPQTGSENDALYEYLR.Q            | 3 | 4.25 | 0.41 | -3.25 |
| IPI00009028 | Tetranectin precursor                                                    | R.IAYKNWETEITAQPDGGKTENCAVLSGAANGK.W | 3 | 6.48 | 0.53 | -3.81 |
| IPI00009028 | Tetranectin precursor                                                    | R.IAYKNWETEITAQPDGGKTENCAVLSGAANGK.W | 4 | 5.14 | 0.41 | -3.92 |
| IPI00009028 | Tetranectin precursor                                                    | R.LDTLAQEVALLK.E                     | 1 | 2.66 | 0.28 | -3.34 |
| IPI00009028 | Tetranectin precursor                                                    | R.LDTLAQEVALLK.E                     | 2 | 4.53 | 0.38 | -3.92 |
| IPI00009028 | Tetranectin precursor                                                    | R.LDTLAQEVALLK.E                     | 3 | 4.91 | 0.22 | -3.16 |
| IPI00009028 | Tetranectin precursor                                                    | R.LDTLAQEVALLKEQQALQTVCLK.G          | 2 | 5.17 | 0.55 | -3.09 |
| IPI00009028 | Tetranectin precursor                                                    | R.LDTLAQEVALLKEQQALQTVCLK.G          | 3 | 7.33 | 0.61 | -4.02 |
| IPI00009028 | Tetranectin precursor                                                    | R.LDTLAQEVALLKEQQALQTVCLK.G          | 4 | 4.46 | 0.40 | -3.04 |
| IPI00009028 | Tetranectin precursor                                                    | R.QSVGNEAEIWLGLNDM*AAEGTWVDM*TGAR.I  | 3 | 6.01 | 0.55 | -5.00 |
| IPI00009028 | Tetranectin precursor                                                    | W.ETEITAQPDGGK.T                     | 2 | 3.01 | 0.21 | -3.99 |
| IPI00009030 | Isoform LAMP-2A of Lysosome-associated membrane glycoprotein 2 precursor | K.EQTVSVSGAFQINTFDLR.V               | 2 | 2.42 | 0.11 | -3.14 |
| IPI00009030 | Isoform LAMP-2A of Lysosome-associated membrane glycoprotein 2 precursor | K.GILTVDELLAIR.I                     | 2 | 3.28 | 0.24 | -4.69 |
| IPI00009030 | Isoform LAMP-2A of Lysosome-associated membrane glycoprotein 2 precursor | K.GILTVDELLAIR.I                     | 3 | 4.00 | 0.18 | -3.13 |
| IPI00009030 | Isoform LAMP-2A of Lysosome-associated membrane glycoprotein 2 precursor | K.YLDFVFAVK.N                        | 1 | 1.97 | 0.27 | -4.19 |
| IPI00009030 | Isoform LAMP-2A of Lysosome-associated membrane glycoprotein 2 precursor | K.YLDFVFAVK.N                        | 2 | 3.47 | 0.36 | -3.76 |
| IPI00009030 | Isoform LAMP-2A of Lysosome-associated membrane glycoprotein 2 precursor | R.IPLNDLFR.C                         | 2 | 3.02 | 0.18 | -2.46 |
| IPI00009030 | Isoform LAMP-2A of Lysosome-associated membrane glycoprotein 2 precursor | R.SHTALLR.L                          | 1 | 1.99 | 0.18 | -4.42 |
| IPI00009030 | Isoform LAMP-2A of Lysosome-associated membrane glycoprotein 2 precursor | R.YETTNKTYK.T                        | 2 | 2.92 | 0.23 | -3.95 |
| IPI00009054 | Isoform BMP1-3 of Bone morphogenetic protein 1 precursor                 | K.AAAFLGDIALDEEDLR.A                 | 2 | 5.72 | 0.46 | -4.81 |

|             |                                                          |                                  |   |      |      |       |
|-------------|----------------------------------------------------------|----------------------------------|---|------|------|-------|
| IPI00009054 | Isoform BMP1-3 of Bone morphogenetic protein 1 precursor | R.AFQVQQAVDLR.R                  | 2 | 3.42 | 0.32 | -4.34 |
| IPI00009070 | Isoform 1 of HBS1-like protein                           | K.STLM*GHMLYLLGNINKRTMHKYEQESK.K | 3 | 3.62 | 0.06 |       |
| IPI00009111 | Trophoblast glycoprotein precursor                       | R.AGAFEHLPSLR.Q                  | 2 | 2.72 | 0.20 | -2.69 |
| IPI00009111 | Trophoblast glycoprotein precursor                       | R.DVLAQLPSLR.H                   | 2 | 3.14 | 0.23 | -3.21 |
| IPI00009111 | Trophoblast glycoprotein precursor                       | R.NLFLTGNQLAVLPAGAFAR.R          | 2 | 5.60 | 0.53 | -5.03 |
| IPI00009111 | Trophoblast glycoprotein precursor                       | R.NLFLTGNQLAVLPAGAFAR.R          | 3 | 4.53 | 0.22 | -3.75 |
| IPI00009111 | Trophoblast glycoprotein precursor                       | R.SFEGM*VVAALLAGR.A              | 2 | 4.87 | 0.46 | -5.27 |
| IPI00009111 | Trophoblast glycoprotein precursor                       | R.SFEGM*VVAALLAGR.A              | 3 | 3.32 | 0.11 | -2.65 |
| IPI00009123 | Nucleobindin-2 precursor                                 | K.ADIEEIKSGR.L                   | 2 | 2.08 | 0.14 | -1.71 |
| IPI00009123 | Nucleobindin-2 precursor                                 | K.AKLDSLQDIGM*DHQALLK.Q          | 3 | 3.85 | 0.28 | -2.60 |
| IPI00009123 | Nucleobindin-2 precursor                                 | K.ELDLVSHHVR.T                   | 2 | 3.40 | 0.35 | -2.54 |
| IPI00009123 | Nucleobindin-2 precursor                                 | K.IEPPDTGLYYDEYLKQVIDVLETDKHFR.E | 5 | 2.37 | 0.22 | -3.84 |
| IPI00009123 | Nucleobindin-2 precursor                                 | K.LQKADIEEIKSGR.L                | 3 | 2.42 | 0.08 | -1.14 |
| IPI00009123 | Nucleobindin-2 precursor                                 | K.QVIDVLETDKHFR.E                | 2 | 2.78 | 0.17 | -3.51 |
| IPI00009123 | Nucleobindin-2 precursor                                 | K.VQNIHPVESAK.I                  | 2 | 3.49 | 0.39 | -2.75 |
| IPI00009123 | Nucleobindin-2 precursor                                 | K.VQNIHPVESAK.I                  | 3 | 1.97 | 0.10 | -2.96 |
| IPI00009123 | Nucleobindin-2 precursor                                 | R.LVTLEEFK.A                     | 2 | 2.74 | 0.22 | -2.62 |
| IPI00009123 | Nucleobindin-2 precursor                                 | R.TKLDLKR.Q                      | 2 | 1.96 | 0.06 | -3.04 |
| IPI00009145 | Mannosyl-oligosaccharide 1,2-alpha-mannosidase IB        | K.FDGAVEAVVR.Q                   | 2 | 2.87 | 0.28 | -3.25 |
| IPI00009145 | Mannosyl-oligosaccharide 1,2-alpha-mannosidase IB        | K.IKENKPLPPVIPNLVGIR.G           | 2 | 4.79 | 0.54 | -2.82 |
| IPI00009145 | Mannosyl-oligosaccharide 1,2-alpha-mannosidase IB        | K.IKENKPLPPVIPNLVGIR.G           | 3 | 3.88 | 0.53 | -3.32 |
| IPI00009145 | Mannosyl-oligosaccharide 1,2-alpha-mannosidase IB        | K.IKENKPLPPVIPNLVGIR.G           | 4 | 2.09 | 0.18 | -1.25 |
| IPI00009145 | Mannosyl-oligosaccharide 1,2-alpha-mannosidase IB        | K.NPGVFLIHGPDEHR.H               | 2 | 3.18 | 0.33 | -3.18 |
| IPI00009145 | Mannosyl-oligosaccharide 1,2-alpha-mannosidase IB        | K.NPGVFLIHGPDEHR.H               | 3 | 2.41 | 0.35 | -1.24 |
| IPI00009145 | Mannosyl-oligosaccharide 1,2-alpha-mannosidase IB        | R.FDLGLEDVLIHVVDAGK.G            | 3 | 4.26 | 0.45 | -2.97 |
| IPI00009145 | Mannosyl-oligosaccharide 1,2-alpha-mannosidase IB        | R.VNGGFSGVK.D                    | 2 | 2.12 | 0.18 | -2.98 |
| IPI00009148 | Diphosphoinositol polyphosphate phosphohydrolase 1       | K.VLQYHKPVQASYFETLR.Q            | 3 | 3.60 | 0.38 | -2.32 |
| IPI00009203 | Sorting nexin-7                                          | K.FIVKGMVERFNDDFIETRRK.A         | 3 | 2.68 | 0.10 | -7.51 |
| IPI00009276 | Endothelial protein C receptor precursor                 | C.SQDASDGLQR.L                   | 2 | 3.07 | 0.25 | -1.04 |
| IPI00009276 | Endothelial protein C receptor precursor                 | R.EFLEDTCVQYVQK.H                | 2 | 5.01 | 0.44 | -1.89 |
| IPI00009276 | Endothelial protein C receptor precursor                 | R.LHM*LQISYFR.D                  | 2 | 3.02 | 0.18 | -2.15 |
| IPI00009276 | Endothelial protein C receptor precursor                 | R.LHM*LQISYFR.D                  | 3 | 3.59 | 0.23 | -2.37 |

|             |                                                |                                      |   |      |      |       |
|-------------|------------------------------------------------|--------------------------------------|---|------|------|-------|
| IPI00009276 | Endothelial protein C receptor precursor       | R.TLAFPLTIR.C                        | 2 | 2.60 | 0.28 | -1.27 |
| IPI00009276 | Endothelial protein C receptor precursor       | R.TQSGLSYLLQFHGLVR.L                 | 2 | 4.71 | 0.46 | -4.03 |
| IPI00009294 | Cysteine-rich motor neuron 1 protein precursor | R.LHPSEDSSLDIASVVVPIII.C             | 2 | 3.26 | 0.34 | -4.14 |
| IPI00009335 | Brain protein 16                               | R.ALVNLAADPGLHETLLAADPGLPAR.L        | 3 | 3.33 | 0.12 |       |
| IPI00009362 | Secretogranin-2 precursor                      | E.IVEEQYTPQSLATLESVFQELGK.L          | 2 | 5.17 | 0.55 | -4.53 |
| IPI00009362 | Secretogranin-2 precursor                      | E.IVEEQYTPQSLATLESVFQELGK.L          | 3 | 3.89 | 0.42 | -4.58 |
| IPI00009362 | Secretogranin-2 precursor                      | K.ANNIAYEDVVGEDWNPVEEK.I             | 2 | 6.42 | 0.56 | -4.50 |
| IPI00009362 | Secretogranin-2 precursor                      | K.DQLSDDVSK.V                        | 2 | 2.55 | 0.21 | -1.08 |
| IPI00009362 | Secretogranin-2 precursor                      | K.EHLNQGSSQETDK.L                    | 2 | 3.19 | 0.21 | -3.62 |
| IPI00009362 | Secretogranin-2 precursor                      | K.EHLNQGSSQETDK.L                    | 3 | 2.87 | 0.13 | -2.85 |
| IPI00009362 | Secretogranin-2 precursor                      | K.EHLNQGSSQETDKLAPVS.K               | 2 | 4.56 | 0.54 | -3.50 |
| IPI00009362 | Secretogranin-2 precursor                      | K.ENGDESHLPER.D                      | 2 | 2.44 | 0.29 | -2.12 |
| IPI00009362 | Secretogranin-2 precursor                      | K.ENGDESHLPERDSLSEEDWM*R.I           | 3 | 3.09 | 0.23 |       |
| IPI00009362 | Secretogranin-2 precursor                      | K.ENIEKNEQINDEM*.K                   | 2 | 4.49 | 0.46 | -3.91 |
| IPI00009362 | Secretogranin-2 precursor                      | K.ENKPYALNSEK.N                      | 1 | 2.17 | 0.20 | -3.79 |
| IPI00009362 | Secretogranin-2 precursor                      | K.ESKDQLSDDVSK.V                     | 2 | 1.74 | 0.16 | -2.24 |
| IPI00009362 | Secretogranin-2 precursor                      | K.IESQTQEEVR.D                       | 2 | 3.24 | 0.34 | -2.81 |
| IPI00009362 | Secretogranin-2 precursor                      | K.IESQTQEEVRDSK.E                    | 2 | 3.65 | 0.35 | -4.51 |
| IPI00009362 | Secretogranin-2 precursor                      | K.IESQTQEEVRDSK.E                    | 3 | 2.01 | 0.19 | -1.05 |
| IPI00009362 | Secretogranin-2 precursor                      | K.IESQTQEEVRDSKENIEKNEQINDE.M        | 3 | 5.18 | 0.30 | -1.94 |
| IPI00009362 | Secretogranin-2 precursor                      | K.IESQTQEEVRDSKENIEKNEQINDEM*.K      | 3 | 3.86 | 0.29 | -2.80 |
| IPI00009362 | Secretogranin-2 precursor                      | K.NDDTPNRQYWDEDLLM*K.V               | 3 | 3.50 | 0.41 | -1.63 |
| IPI00009362 | Secretogranin-2 precursor                      | K.RLVNAAGSGR.L                       | 2 | 3.53 | 0.30 | -2.82 |
| IPI00009362 | Secretogranin-2 precursor                      | K.RTNEIVEEQYTPQSLATLESVFQELGK.L      | 3 | 4.14 | 0.34 | -3.63 |
| IPI00009362 | Secretogranin-2 precursor                      | K.SGYPKTPGR.A                        | 2 | 1.40 | 0.12 | -2.70 |
| IPI00009362 | Secretogranin-2 precursor                      | K.TSYFPNPYNQEK.V                     | 2 | 2.97 | 0.34 | -2.24 |
| IPI00009362 | Secretogranin-2 precursor                      | K.VLEYLNQEK.A                        | 1 | 2.45 | 0.12 | -3.23 |
| IPI00009362 | Secretogranin-2 precursor                      | K.VLEYLNQEK.A                        | 2 | 3.18 | 0.23 | -2.40 |
| IPI00009362 | Secretogranin-2 precursor                      | K.VLEYLNQEKAEK.G                     | 2 | 3.89 | 0.33 | -3.28 |
| IPI00009362 | Secretogranin-2 precursor                      | K.VLEYLNQEKAEK.G                     | 3 | 1.83 | 0.14 | -1.35 |
| IPI00009362 | Secretogranin-2 precursor                      | L.RQAENEPQSAPK.E                     | 2 | 2.95 | 0.20 | -0.74 |
| IPI00009362 | Secretogranin-2 precursor                      | N.PVEEKIESQTQEEVR.D                  | 3 | 3.66 | 0.32 | -0.92 |
| IPI00009362 | Secretogranin-2 precursor                      | P.GQGSSDDLQEEEQIEQAIK.E              | 2 | 6.20 | 0.35 | -4.02 |
| IPI00009362 | Secretogranin-2 precursor                      | P.GQGSSDDLQEEEQIEQAIKEHLNQGSSQETDK.L | 3 | 6.29 | 0.58 | -3.25 |
| IPI00009362 | Secretogranin-2 precursor                      | P.VGPPKNDTTPNR.Q                     | 2 | 2.93 | 0.38 | -2.57 |
| IPI00009362 | Secretogranin-2 precursor                      | R.AGTEALPDGLSVEDILNLLGM*ESAAANQK.T   | 3 | 4.27 | 0.40 |       |
| IPI00009362 | Secretogranin-2 precursor                      | R.ALEYIENLR.Q                        | 2 | 3.43 | 0.12 | -2.03 |
| IPI00009362 | Secretogranin-2 precursor                      | R.DSKENIEKNEQINDEM*.K                | 2 | 5.04 | 0.50 | -2.81 |
| IPI00009362 | Secretogranin-2 precursor                      | R.DSLSEEDWM*R.I                      | 2 | 2.79 | 0.26 | -3.68 |
| IPI00009362 | Secretogranin-2 precursor                      | R.ELDLPVLDLDDISEADLDHPDLFQNR.M       | 3 | 2.52 | 0.25 | -3.75 |
| IPI00009362 | Secretogranin-2 precursor                      | R.ERM*DEEQKLYTDEDDIYK.A              | 3 | 4.32 | 0.46 | -3.21 |
| IPI00009362 | Secretogranin-2 precursor                      | R.FPVGPPKNDTTPNR.Q                   | 3 | 2.84 | 0.26 |       |



|             |                                                           |                                             |   |      |      |       |
|-------------|-----------------------------------------------------------|---------------------------------------------|---|------|------|-------|
| IPI00009362 | Secretogranin-2 precursor                                 | R.KESKDQLSDDVSK.V                           | 2 | 4.51 | 0.38 | -2.68 |
| IPI00009362 | Secretogranin-2 precursor                                 | R.KESKDQLSDDVSK.V                           | 3 | 2.16 | 0.16 | 0.21  |
| IPI00009362 | Secretogranin-2 precursor                                 | R.LENVQKFPSP*IR.A                           | 2 | 3.30 | 0.30 | -1.94 |
| IPI00009362 | Secretogranin-2 precursor                                 | R.LENVQKFPSP*IR.A                           | 3 | 3.54 | 0.21 | -1.97 |
| IPI00009362 | Secretogranin-2 precursor                                 | R.LFEKPLDSQSIYQLIEISR.N                     | 3 | 3.92 | 0.28 | -3.84 |
| IPI00009362 | Secretogranin-2 precursor                                 | R.M*LVKYPEIINSNV.K                          | 2 | 3.82 | 0.21 | -2.00 |
| IPI00009362 | Secretogranin-2 precursor                                 | R.NQLLQKEPDLR.L                             | 2 | 3.11 | 0.19 | -6.21 |
| IPI00009362 | Secretogranin-2 precursor                                 | R.NQLLQKEPDLRLENVQKFPSP*IR.A                | 3 | 5.52 | 0.42 |       |
| IPI00009362 | Secretogranin-2 precursor                                 | R.NQLLQKEPDLRLENVQKFPSP*IR.A                | 4 | 2.98 | 0.21 | -4.50 |
| IPI00009362 | Secretogranin-2 precursor                                 | R.QAENEPQSAPK.E                             | 2 | 2.13 | 0.27 | -1.72 |
| IPI00009362 | Secretogranin-2 precursor                                 | R.QYWDEDLLM*K.V                             | 2 | 2.50 | 0.29 | -3.18 |
| IPI00009362 | Secretogranin-2 precursor                                 | R.TNEIVEEQYTPQSLATLESVVFQELGK.L             | 2 | 5.77 | 0.60 | -6.41 |
| IPI00009362 | Secretogranin-2 precursor                                 | R.TNEIVEEQYTPQSLATLESVVFQELGK.L             | 3 | 7.35 | 0.57 | -5.97 |
| IPI00009362 | Secretogranin-2 precursor                                 | R.TNEIVEEQYTPQSLATLESVVFQELGK.L             | 4 | 5.13 | 0.40 | -3.41 |
| IPI00009362 | Secretogranin-2 precursor                                 | R.TNEIVEEQYTPQSLATLESVVFQELGKLTGPNNQ.K      | 3 | 4.78 | 0.50 | -4.51 |
| IPI00009362 | Secretogranin-2 precursor                                 | R.VPGQGSSEDDLQEEEQIEQAIK.E                  | 2 | 5.87 | 0.43 | -4.52 |
| IPI00009362 | Secretogranin-2 precursor                                 | R.VPGQGSSEDDLQEEEQIEQAIK.E                  | 3 | 3.42 | 0.28 | -4.79 |
| IPI00009362 | Secretogranin-2 precursor                                 | R.VPGQGSSEDDLQEEEQIEQAIKEHLNQSSQETD.K       | 3 | 6.76 | 0.55 | -4.14 |
| IPI00009362 | Secretogranin-2 precursor                                 | R.VPGQGSSEDDLQEEEQIEQAIKEHLNQSSQETDK.L      | 3 | 4.35 | 0.44 | -3.36 |
| IPI00009362 | Secretogranin-2 precursor                                 | R.VPGQGSSEDDLQEEEQIEQAIKEHLNQSSQETDK.L      | 4 | 6.66 | 0.52 | -3.37 |
| IPI00009362 | Secretogranin-2 precursor                                 | R.VPGQGSSEDDLQEEEQIEQAIKEHLNQSSQETDKLAPVS.K | 3 | 5.29 | 0.41 | -3.56 |
| IPI00009362 | Secretogranin-2 precursor                                 | R.VPGQGSSEDDLQEEEQIEQAIKEHLNQSSQETDKLAPVS.K | 4 | 5.78 | 0.48 | -3.59 |
| IPI00009362 | Secretogranin-2 precursor                                 | V.PGQGSSEDDLQEEEQIEQAIK.E                   | 2 | 5.43 | 0.51 | -5.91 |
| IPI00009362 | Secretogranin-2 precursor                                 | V.PGQGSSEDDLQEEEQIEQAIKEHLNQSSQETDK.L       | 4 | 5.37 | 0.43 | -0.54 |
| IPI00009362 | Secretogranin-2 precursor                                 | W.NPVEEKIESQTQEEVR.D                        | 3 | 4.24 | 0.48 | -2.63 |
| IPI00009365 | COX16-like protein C14orf112, mitochondrial precursor     | K.ISLESEYEK.I                               | 2 | 2.19 | 0.18 | -1.60 |
| IPI00009377 | HSPC212                                                   | K.EMEASGAHRDSQKAGER.D                       | 2 | 2.35 | 0.16 |       |
| IPI00009396 | Isoform 1 of Cannabinoid receptor 1                       | K.FPLTSFR.G                                 | 2 | 1.65 | 0.12 | -1.69 |
| IPI00009396 | Isoform 1 of Cannabinoid receptor 1                       | K.LGYFPQKFPLTSFR.G                          | 3 | 3.72 | 0.34 | -2.36 |
| IPI00009439 | Synaptotagmin-1                                           | K.LQYSLDYDFQNNQLLVGIIQAAELPALDMGGTSDPYVK.V  | 3 | 3.92 | 0.50 | -1.46 |
| IPI00009439 | Synaptotagmin-1                                           | K.LQYSLDYDFQNNQLLVGIIQAAELPALDMGGTSDPYVK.V  | 4 | 2.74 | 0.15 | -1.05 |
| IPI00009439 | Synaptotagmin-1                                           | K.TLNPVFNEQFTFK.V                           | 2 | 2.11 | 0.26 | -1.83 |
| IPI00009471 | WD repeat-containing protein 3                            | R.DVIGFNMAGLDYLKR.E                         | 3 | 2.70 | 0.14 | -6.62 |
| IPI00009477 | Intercellular adhesion molecule 2 precursor               | R.QVILTLQPTLVAVGK.S                         | 2 | 4.75 | 0.38 | -3.79 |
| IPI00009477 | Intercellular adhesion molecule 2 precursor               | R.VPTVEPLDSLTLFLFR.G                        | 2 | 4.82 | 0.53 | -5.58 |
| IPI00009477 | Intercellular adhesion molecule 2 precursor               | R.VPTVEPLDSLTLFLFR.G                        | 3 | 3.79 | 0.17 | -3.58 |
| IPI00009532 | 4-aminobutyrate aminotransferase, mitochondrial precursor | K.NLLLAEVINIIK.R                            | 2 | 4.01 | 0.29 | -4.61 |
| IPI00009771 | Lamin-B2                                                  | K.EQEMTEM*R.D                               | 2 | 2.36 | 0.11 |       |
| IPI00009793 | Complement C1r-like protein                               | G.SVLLAQELPQQLTSPGYPEPYGK.G                 | 2 | 3.91 | 0.31 | -2.64 |
| IPI00009793 | Complement C1r-like protein                               | G.SVLLAQELPQQLTSPGYPEPYGK.G                 | 3 | 4.60 | 0.32 | -4.29 |

|             |                                               |                                    |   |      |      |       |
|-------------|-----------------------------------------------|------------------------------------|---|------|------|-------|
| IPI00009793 | Complement C1r-like protein                   | G.SVLLAQELPQQLTSPGYPEPYGKGQESSTDIA | 3 | 3.57 | 0.35 | -3.15 |
| IPI00009793 | Complement C1r-like protein                   | K.APEGFAVR.L                       | 2 | 2.27 | 0.18 | -2.53 |
| IPI00009793 | Complement C1r-like protein                   | K.QGESSTDIAPEGFAVR.L               | 2 | 3.77 | 0.36 | -2.99 |
| IPI00009793 | Complement C1r-like protein                   | K.QGESSTDIAPEGFAVR.L               | 3 | 2.87 | 0.29 | -0.89 |
| IPI00009793 | Complement C1r-like protein                   | K.LGNFPWQAFTSIHGR.G                | 3 | 3.12 | 0.28 | -3.19 |
| IPI00009793 | Complement C1r-like protein                   | K.VLSYVDWIK.G                      | 2 | 2.86 | 0.30 | -2.35 |
| IPI00009793 | Complement C1r-like protein                   | K.YSRLPVAPR.E                      | 2 | 2.72 | 0.21 | -2.77 |
| IPI00009793 | Complement C1r-like protein                   | R.GGGALLGDR.W                      | 1 | 2.35 | 0.20 | -2.80 |
| IPI00009793 | Complement C1r-like protein                   | R.GGGALLGDR.W                      | 2 | 3.11 | 0.23 | -4.75 |
| IPI00009793 | Complement C1r-like protein                   | R.GSEAINAPGDNPAK.V                 | 2 | 4.23 | 0.45 | -3.15 |
| IPI00009793 | Complement C1r-like protein                   | R.VVVHPDYR.Q                       | 1 | 2.24 | 0.11 | -4.13 |
| IPI00009793 | Complement C1r-like protein                   | R.VVVHPDYR.Q                       | 2 | 2.18 | 0.22 | -1.02 |
| IPI00009802 | Isoform V0 of Versican core protein precursor | K.IEVDKNGKDLK.E                    | 2 | 3.05 | 0.15 | -0.99 |
| IPI00009802 | Isoform V0 of Versican core protein precursor | K.IGQDYKGR.V                       | 2 | 2.06 | 0.14 | -2.37 |
| IPI00009802 | Isoform V0 of Versican core protein precursor | K.LLASDAGLYR.C                     | 2 | 3.43 | 0.38 | -1.16 |
| IPI00009802 | Isoform V0 of Versican core protein precursor | R.AATSRYTLNFEAAQK.A                | 2 | 3.59 | 0.19 | -2.51 |
| IPI00009802 | Isoform V0 of Versican core protein precursor | R.AATSRYTLNFEAAQK.A                | 3 | 3.26 | 0.30 | -3.65 |
| IPI00009802 | Isoform V0 of Versican core protein precursor | R.AQC GGGLLGVR.T                   | 2 | 2.59 | 0.05 | -3.12 |
| IPI00009802 | Isoform V0 of Versican core protein precursor | R.EIVISER.L                        | 2 | 1.78 | 0.07 | -4.13 |
| IPI00009802 | Isoform V0 of Versican core protein precursor | R.ITEEFLGK.Y                       | 1 | 2.11 | 0.06 | -3.09 |
| IPI00009802 | Isoform V0 of Versican core protein precursor | R.LATVGELQAAWR.N                   | 2 | 3.69 | 0.33 | -2.47 |
| IPI00009802 | Isoform V0 of Versican core protein precursor | R.LGEPNYGAEIR.G                    | 2 | 3.49 | 0.27 | -2.55 |
| IPI00009802 | Isoform V0 of Versican core protein precursor | R.NGFDQCDYGWLSASVR.H               | 2 | 4.84 | 0.45 | -2.06 |
| IPI00009802 | Isoform V0 of Versican core protein precursor | R.QEVNPNVQEIESETTSEEQIQEEK.S       | 3 | 4.45 | 0.32 | -2.69 |
| IPI00009802 | Isoform V0 of Versican core protein precursor | R.SPQETYDVYCYVDHLDGDVFLTVPSK.F     | 3 | 4.09 | 0.40 | 0.97  |
| IPI00009802 | Isoform V0 of Versican core protein precursor | R.SPQETYDVYCYVDHLDGDVFLTVPSK.F     | 4 | 4.52 | 0.44 | -6.16 |
| IPI00009802 | Isoform V0 of Versican core protein precursor | R.VSVPTHPEAVGDASLTVVK.L            | 2 | 4.29 | 0.51 | -3.60 |
| IPI00009802 | Isoform V0 of Versican core protein precursor | R.VSVPTHPEAVGDASLTVVK.L            | 3 | 4.08 | 0.25 | -3.51 |
| IPI00009802 | Isoform V0 of Versican core protein precursor | R.YTLNFEAAQK.A                     | 2 | 3.14 | 0.29 | -3.14 |
| IPI00009826 | Carboxypeptidase B precursor                  | K.YVASVLEHLY.-                     | 2 | 3.32 | 0.36 | -2.01 |
| IPI00009826 | Carboxypeptidase B precursor                  | R.SVIGTTFEGR.A                     | 2 | 3.26 | 0.35 | -1.22 |
| IPI00009826 | Carboxypeptidase B precursor                  | R.YGFLLPESQIR.A                    | 2 | 2.93 | 0.19 | -2.21 |
| IPI00009865 | Keratin, type I cytoskeletal 10               | K.ADLEM*QIESLTEELAYLK.K            | 2 | 3.96 | 0.33 |       |
| IPI00009865 | Keratin, type I cytoskeletal 10               | K.ADLEM*QIESLTEELAYLK.K            | 3 | 2.41 | 0.14 | -2.76 |
| IPI00009865 | Keratin, type I cytoskeletal 10               | K.DAEAWFNEK.S                      | 2 | 2.70 | 0.20 |       |
| IPI00009865 | Keratin, type I cytoskeletal 10               | K.GSLGGGFSSGGFSSGFSR.G             | 2 | 5.51 | 0.61 | -3.24 |
| IPI00009865 | Keratin, type I cytoskeletal 10               | K.QSLEASLAETEGR.Y                  | 2 | 3.28 | 0.28 |       |
| IPI00009865 | Keratin, type I cytoskeletal 10               | K.SSSSGSVGESSSKG.P                 | 2 | 4.27 | 0.46 | -2.60 |
| IPI00009865 | Keratin, type I cytoskeletal 10               | K.SSSSGSVGESSSKGP.R                | 2 | 4.07 | 0.39 | -1.70 |
| IPI00009865 | Keratin, type I cytoskeletal 10               | K.TIDDLKNQILNLTDDNANILLQIDNAR.L    | 3 | 5.71 | 0.27 |       |
| IPI00009865 | Keratin, type I cytoskeletal 10               | R.GSSGGGCFGGSSGGYGLGGFGGGSFR.G     | 2 | 5.84 | 0.38 |       |
| IPI00009865 | Keratin, type I cytoskeletal 10               | R.LAADDFR.L                        | 2 | 2.47 | 0.23 | -3.76 |

|             |                                          |                                      |   |      |      |       |
|-------------|------------------------------------------|--------------------------------------|---|------|------|-------|
| IPI00009865 | Keratin, type I cytoskeletal 10          | R.LASYLDKVR.A                        | 2 | 2.65 | 0.13 | -3.49 |
| IPI00009865 | Keratin, type I cytoskeletal 10          | R.NVSTGDVNVEM*NAAPGVDLTQLLNNM*R.S    | 2 | 4.80 | 0.43 |       |
| IPI00009865 | Keratin, type I cytoskeletal 10          | R.NVSTGDVNVEM*NAAPGVDLTQLLNNM*R.S    | 3 | 3.68 | 0.36 | -3.24 |
| IPI00009865 | Keratin, type I cytoskeletal 10          | R.SGGGGGGGGCGGGGGVSSLR.I             | 2 | 3.03 | 0.36 |       |
| IPI00009865 | Keratin, type I cytoskeletal 10          | R.SQYEQLAEQNRK.D                     | 2 | 3.41 | 0.22 | -3.30 |
| IPI00009867 | Keratin, type II cytoskeletal 5          | K.KYEDEINKR.T                        | 2 | 3.00 | 0.17 | -1.46 |
| IPI00009867 | Keratin, type II cytoskeletal 5          | R.NLDLDSIIAEVKAQYEEIANR.S            | 3 | 3.40 | 0.16 |       |
| IPI00009881 | Neuroendocrine secretory protein 55      | K.HSTFGQSLTQR.L                      | 2 | 2.76 | 0.40 | -3.55 |
| IPI00009890 | Glia-derived nexin precursor             | K.TIDSWMSIM*VPK.R                    | 2 | 2.85 | 0.18 |       |
| IPI00009890 | Glia-derived nexin precursor             | R.DM*IDNLLSPDLIDGVLTR.L              | 2 | 3.21 | 0.15 |       |
| IPI00009899 | Uncharacterized protein C5orf5           | R.LVKQMLTRASITPVLGSPSTKR.R           | 2 | 2.43 | 0.20 |       |
| IPI00009901 | Nuclear transport factor 2               | K.ADEDPIIM*GFHQM*FLLK.N              | 2 | 3.38 | 0.14 | -2.77 |
| IPI00009901 | Nuclear transport factor 2               | K.IQHSITAQDHQPTDSCIISM*VVGQLK.A      | 3 | 4.13 | 0.42 | -2.87 |
| IPI00009904 | Protein disulfide-isomerase A4 precursor | K.IANILKDKDPPIPVAK.I                 | 3 | 2.52 | 0.13 | -2.69 |
| IPI00009904 | Protein disulfide-isomerase A4 precursor | K.IANILKDKDPPIPVAK.I                 | 4 | 2.89 | 0.25 | -2.37 |
| IPI00009904 | Protein disulfide-isomerase A4 precursor | K.KGQAVDYEGSR.T                      | 2 | 3.66 | 0.36 | -1.27 |
| IPI00009904 | Protein disulfide-isomerase A4 precursor | K.M*DATAANDVPSDR.Y                   | 2 | 3.24 | 0.30 | -1.95 |
| IPI00009904 | Protein disulfide-isomerase A4 precursor | K.VDATAETDLAK.R                      | 2 | 3.91 | 0.26 | -2.38 |
| IPI00009904 | Protein disulfide-isomerase A4 precursor | K.VSQGQLVVM*QPEK.F                   | 2 | 3.90 | 0.32 | -3.17 |
| IPI00009904 | Protein disulfide-isomerase A4 precursor | K.YALPLVGHR.K                        | 2 | 2.13 | 0.16 | -1.40 |
| IPI00009904 | Protein disulfide-isomerase A4 precursor | K.YGIVDYM*IEQSGPPSKEILTLK.Q          | 3 | 3.07 | 0.26 | -1.69 |
| IPI00009904 | Protein disulfide-isomerase A4 precursor | R.SHM*M*DVQGSTQDSAIFKDFVLK.Y         | 3 | 3.14 | 0.32 | -3.04 |
| IPI00009920 | Complement component 6 precursor         | K.AKDLHLSDVFLK.A                     | 2 | 4.54 | 0.52 | -2.39 |
| IPI00009920 | Complement component 6 precursor         | K.AKDLHLSDVFLK.A                     | 3 | 3.82 | 0.44 | -2.22 |
| IPI00009920 | Complement component 6 precursor         | K.ALNHLPLEYNSALYSR.I                 | 2 | 4.00 | 0.43 | -2.71 |
| IPI00009920 | Complement component 6 precursor         | K.ALNHLPLEYNSALYSR.I                 | 3 | 4.49 | 0.27 | -4.10 |
| IPI00009920 | Complement component 6 precursor         | K.ALQEYAAK.F                         | 2 | 2.14 | 0.09 | -1.55 |
| IPI00009920 | Complement component 6 precursor         | K.CVCLLPQCFC.G                       | 2 | 3.44 | 0.11 | -2.47 |
| IPI00009920 | Complement component 6 precursor         | K.DLHLSDVFLK.A                       | 2 | 3.13 | 0.23 | -1.93 |
| IPI00009920 | Complement component 6 precursor         | K.ENPAVIDFELAPIVDLVR.N               | 2 | 6.07 | 0.53 | -5.62 |
| IPI00009920 | Complement component 6 precursor         | K.ENPAVIDFELAPIVDLVR.N               | 3 | 3.69 | 0.28 | -4.53 |
| IPI00009920 | Complement component 6 precursor         | K.HEGSFIQGAEK.S                      | 2 | 2.39 | 0.18 | -2.64 |
| IPI00009920 | Complement component 6 precursor         | K.LSEKHEGSFIQGAEK.S                  | 2 | 3.88 | 0.23 | -3.16 |
| IPI00009920 | Complement component 6 precursor         | K.LSEKHEGSFIQGAEK.S                  | 3 | 4.72 | 0.45 | -2.88 |
| IPI00009920 | Complement component 6 precursor         | K.RSENINHNSAFK.Q                     | 2 | 3.57 | 0.36 | -4.85 |
| IPI00009920 | Complement component 6 precursor         | K.RSENINHNSAFK.Q                     | 3 | 3.23 | 0.23 | -3.74 |
| IPI00009920 | Complement component 6 precursor         | K.TFSEWLESVK.E                       | 2 | 2.86 | 0.33 | -3.24 |
| IPI00009920 | Complement component 6 precursor         | K.TFSEWLESVKENPAVIDFELAPIVDLVR.N     | 3 | 3.72 | 0.33 | -4.33 |
| IPI00009920 | Complement component 6 precursor         | K.TLNICEVGTIR.C                      | 2 | 3.64 | 0.43 | -1.33 |
| IPI00009920 | Complement component 6 precursor         | R.CLPDGTWR.Q                         | 2 | 1.94 | 0.10 | 0.18  |
| IPI00009920 | Complement component 6 precursor         | R.GEVLDNSFTGGICK.T                   | 2 | 4.44 | 0.49 | -3.62 |
| IPI00009920 | Complement component 6 precursor         | R.IFDDFGTHYFTSGSLGGVYDILLYQFSSEELK.N | 3 | 5.65 | 0.51 | -4.39 |

|             |                                                     |                                               |   |      |      |       |
|-------------|-----------------------------------------------------|-----------------------------------------------|---|------|------|-------|
| IPI00009920 | Complement component 6 precursor                    | R.IFDDFGTHYFTSGSLGGVYDLLYQFSSEELKNSGLTEEEAK.H | 3 | 2.81 | 0.20 | -3.49 |
| IPI00009920 | Complement component 6 precursor                    | R.IFDDFGTHYFTSGSLGGVYDLLYQFSSEELKNSGLTEEEAK.H | 4 | 6.39 | 0.54 | -5.35 |
| IPI00009920 | Complement component 6 precursor                    | R.IGESIELTCPK.G                               | 2 | 3.23 | 0.32 | -3.08 |
| IPI00009920 | Complement component 6 precursor                    | R.KALQEYAAK.F                                 | 1 | 2.42 | 0.14 | -4.59 |
| IPI00009920 | Complement component 6 precursor                    | R.KALQEYAAK.F                                 | 2 | 2.43 | 0.23 | -1.78 |
| IPI00009920 | Complement component 6 precursor                    | R.KYNPIPSVQLM*GNGFHFLAGEPR.G                  | 3 | 3.93 | 0.38 | -4.22 |
| IPI00009920 | Complement component 6 precursor                    | R.KYNPIPSVQLM*GNGFHFLAGEPR.G                  | 4 | 3.96 | 0.24 | -3.63 |
| IPI00009920 | Complement component 6 precursor                    | R.QLEWGLER.T                                  | 2 | 1.85 | 0.13 | -0.82 |
| IPI00009920 | Complement component 6 precursor                    | R.SENINHNSAFK.Q                               | 1 | 2.83 | 0.19 | -0.95 |
| IPI00009920 | Complement component 6 precursor                    | R.SENINHNSAFK.Q                               | 3 | 1.69 | 0.22 | -0.79 |
| IPI00009920 | Complement component 6 precursor                    | R.SEYGAALAWEK.G                               | 1 | 2.30 | 0.12 | -2.68 |
| IPI00009920 | Complement component 6 precursor                    | R.SEYGAALAWEK.G                               | 2 | 3.41 | 0.32 | -2.44 |
| IPI00009920 | Complement component 6 precursor                    | R.TSNPYRVPANLENVGFVQTAEDDLK.T                 | 3 | 5.28 | 0.42 | -2.13 |
| IPI00009920 | Complement component 6 precursor                    | R.TSNPYRVPANLENVGFVQTAEDDLKTDYK.D             | 3 | 6.83 | 0.50 | -3.18 |
| IPI00009920 | Complement component 6 precursor                    | R.TSNPYRVPANLENVGFVQTAEDDLKTDYK.D             | 4 | 4.59 | 0.47 | -2.71 |
| IPI00009920 | Complement component 6 precursor                    | R.VPANLENVGFVQTAEDDLKTDYK.D                   | 3 | 6.30 | 0.58 | -3.92 |
| IPI00009943 | Tumor protein, translationally-controlled 1         | K.YIKDYM*K.S                                  | 2 | 2.00 | 0.07 | 1.10  |
| IPI00009950 | Vesicular integral-membrane protein VIP36 precursor | A.DITDGNSEHLKR.E                              | 2 | 3.14 | 0.29 | -5.35 |
| IPI00009950 | Vesicular integral-membrane protein VIP36 precursor | I.TDGNSEHLKR.E                                | 2 | 3.08 | 0.24 | -2.65 |
| IPI00009950 | Vesicular integral-membrane protein VIP36 precursor | K.DNFHGLAIFLDTYPNDETTTER.V                    | 2 | 6.60 | 0.57 | -8.03 |
| IPI00009950 | Vesicular integral-membrane protein VIP36 precursor | K.DNFHGLAIFLDTYPNDETTTER.V                    | 3 | 4.75 | 0.38 | -5.52 |
| IPI00009950 | Vesicular integral-membrane protein VIP36 precursor | K.DNVDDPTGNFR.S                               | 2 | 3.44 | 0.40 | -2.92 |
| IPI00009950 | Vesicular integral-membrane protein VIP36 precursor | K.LFQLM*VEHTPDEESIDWTK.I                      | 2 | 4.70 | 0.56 | -4.23 |
| IPI00009950 | Vesicular integral-membrane protein VIP36 precursor | K.LFQLM*VEHTPDEESIDWTK.I                      | 3 | 5.10 | 0.45 | -3.64 |
| IPI00009950 | Vesicular integral-membrane protein VIP36 precursor | K.NCIDITGVR.L                                 | 1 | 2.82 | 0.20 | -3.73 |
| IPI00009950 | Vesicular integral-membrane protein VIP36 precursor | K.NCIDITGVR.L                                 | 2 | 3.00 | 0.17 | -1.67 |
| IPI00009950 | Vesicular integral-membrane protein VIP36 precursor | K.NLHGDGIALWYTR.D                             | 2 | 4.00 | 0.39 | -4.76 |
| IPI00009950 | Vesicular integral-membrane protein VIP36 precursor | R.DHDTFLAVR.Y                                 | 2 | 2.68 | 0.29 | -1.36 |
| IPI00009950 | Vesicular integral-membrane protein VIP36 precursor | R.DRLVPGPVFGSK.D                              | 2 | 3.05 | 0.37 | -4.13 |

|             |                                                                |                                         |   |      |      |       |
|-------------|----------------------------------------------------------------|-----------------------------------------|---|------|------|-------|
| IPI00009950 | Vesicular integral-membrane protein VIP36 precursor            | R.DRLVPGPVFGSK.D                        | 3 | 2.90 | 0.43 | -2.79 |
| IPI00009950 | Vesicular integral-membrane protein VIP36 precursor            | R.EHSLIKPYQGVGSSSM*PLWDFQGSTM*LTSQYVR.L | 3 | 4.81 | 0.41 | -3.56 |
| IPI00009950 | Vesicular integral-membrane protein VIP36 precursor            | R.EHSLIKPYQGVGSSSM*PLWDFQGSTM*LTSQYVR.L | 4 | 5.01 | 0.36 | -3.88 |
| IPI00009950 | Vesicular integral-membrane protein VIP36 precursor            | R.LPTGYFFGASAGTGDLSNDHDIISM*K.L         | 2 | 6.25 | 0.59 | -3.89 |
| IPI00009950 | Vesicular integral-membrane protein VIP36 precursor            | R.LPTGYFFGASAGTGDLSNDHDIISM*K.L         | 3 | 6.55 | 0.61 | -5.84 |
| IPI00009950 | Vesicular integral-membrane protein VIP36 precursor            | R.WTELAGCTADFR.N                        | 2 | 4.10 | 0.50 | -2.72 |
| IPI00009950 | Vesicular integral-membrane protein VIP36 precursor            | V.PGPVFGSK.D                            | 1 | 2.15 | 0.26 | -4.55 |
| IPI00009950 | Vesicular integral-membrane protein VIP36 precursor            | W.DFQGSTM*LTSQYVR.L                     | 2 | 4.39 | 0.47 | -2.18 |
| IPI00009997 | N-acetyllactosaminide beta-1,3-N-acetylglucosaminyltransferase | A.LASGGVLDASGDYR.V                      | 2 | 3.61 | 0.30 | -2.17 |
| IPI00009997 | N-acetyllactosaminide beta-1,3-N-acetylglucosaminyltransferase | A.SVDNLLHLSGLLER.W                      | 3 | 3.93 | 0.45 | -1.05 |
| IPI00009997 | N-acetyllactosaminide beta-1,3-N-acetylglucosaminyltransferase | D.PREPGEFALLR.S                         | 2 | 3.14 | 0.15 | -1.42 |
| IPI00009997 | N-acetyllactosaminide beta-1,3-N-acetylglucosaminyltransferase | E.PFYVAGGKVPTFDER.F                     | 3 | 3.56 | 0.32 | 0.01  |
| IPI00009997 | N-acetyllactosaminide beta-1,3-N-acetylglucosaminyltransferase | E.PGEFALLR.S                            | 2 | 2.93 | 0.30 | -2.10 |
| IPI00009997 | N-acetyllactosaminide beta-1,3-N-acetylglucosaminyltransferase | G.GTALVVPFAFEIR.R                       | 2 | 2.95 | 0.36 | -3.53 |
| IPI00009997 | N-acetyllactosaminide beta-1,3-N-acetylglucosaminyltransferase | H.ASVDNLLHLSGLLER.W                     | 2 | 4.19 | 0.37 | -2.71 |
| IPI00009997 | N-acetyllactosaminide beta-1,3-N-acetylglucosaminyltransferase | H.ASVDNLLHLSGLLER.W                     | 3 | 5.57 | 0.49 | -2.95 |
| IPI00009997 | N-acetyllactosaminide beta-1,3-N-acetylglucosaminyltransferase | K.AKYPNSPR.R                            | 2 | 1.91 | 0.21 | -2.60 |
| IPI00009997 | N-acetyllactosaminide beta-1,3-N-acetylglucosaminyltransferase | K.EALKFHPQK.E                           | 1 | 2.65 | 0.08 | -4.04 |
| IPI00009997 | N-acetyllactosaminide beta-1,3-N-acetylglucosaminyltransferase | K.EALKFHPQK.E                           | 2 | 2.29 | 0.15 | -3.11 |
| IPI00009997 | N-acetyllactosaminide beta-1,3-N-acetylglucosaminyltransferase | K.EALKFHPQKEAENQHMK.I                   | 3 | 3.96 | 0.29 | -3.26 |
| IPI00009997 | N-acetyllactosaminide beta-1,3-N-acetylglucosaminyltransferase | K.EEAQLATVLAIALSSHCPDM*R.A              | 2 | 4.53 | 0.48 | -3.89 |

|             |                                 |                                   |   |      |      |       |
|-------------|---------------------------------|-----------------------------------|---|------|------|-------|
| IPI00009997 | N-acetylglucosaminyltransferase | K.EEAQLATVLAYALSSHCPDM*R.A        | 3 | 2.89 | 0.37 | -3.23 |
| IPI00009997 | N-acetylglucosaminyltransferase | K.EEAQLATVLAYALSSHCPDM*R.A        | 4 | 3.65 | 0.17 | -3.14 |
| IPI00009997 | N-acetylglucosaminyltransferase | K.FHPQKEAENQHNK.I                 | 2 | 3.53 | 0.39 | -4.36 |
| IPI00009997 | N-acetylglucosaminyltransferase | K.FHPQKEAENQHNK.I                 | 4 | 1.92 | 0.18 | -5.16 |
| IPI00009997 | N-acetylglucosaminyltransferase | K.TTM*DPNDVILATH.A                | 2 | 3.41 | 0.40 | -2.69 |
| IPI00009997 | N-acetylglucosaminyltransferase | K.TTM*DPNDVILATHASVDNLLHLSGLLER.W | 2 | 3.89 | 0.55 | -3.25 |
| IPI00009997 | N-acetylglucosaminyltransferase | K.TTM*DPNDVILATHASVDNLLHLSGLLER.W | 3 | 5.40 | 0.62 | -8.09 |
| IPI00009997 | N-acetylglucosaminyltransferase | K.TTM*DPNDVILATHASVDNLLHLSGLLER.W | 4 | 4.45 | 0.52 | -5.97 |
| IPI00009997 | N-acetylglucosaminyltransferase | K.VPTFDER.F                       | 1 | 2.00 | 0.17 | -2.82 |
| IPI00009997 | N-acetylglucosaminyltransferase | L.LSGLHGQEEQDQYFEFFPPSPR.S        | 2 | 4.86 | 0.44 | -3.75 |
| IPI00009997 | N-acetylglucosaminyltransferase | L.LSGLHGQEEQDQYFEFFPPSPR.S        | 3 | 4.29 | 0.38 | -3.40 |
| IPI00009997 | N-acetylglucosaminyltransferase | L.SLLSGLHGQEEQDQYFEFFPPSPR.S      | 2 | 5.08 | 0.57 | -1.96 |
| IPI00009997 | N-acetylglucosaminyltransferase | L.SLLSGLHGQEEQDQYFEFFPPSPR.S      | 3 | 3.99 | 0.50 | -3.43 |
| IPI00009997 | N-acetylglucosaminyltransferase | L.YLSLLSGLHGQEEQDQYFEFFPPSPR.S    | 3 | 4.17 | 0.52 | -3.45 |
| IPI00009997 | N-acetylglucosaminyltransferase | M.DPNDVILATHASVDNLLHLSGLLER.W     | 3 | 5.24 | 0.47 | -3.18 |
| IPI00009997 | N-acetylglucosaminyltransferase | Q.LLYLSLLSGLHGQEEQDQYFEFFPPSPR.S  | 3 | 3.90 | 0.39 | -4.25 |
| IPI00009997 | N-acetylglucosaminyltransferase | R.EGANYALVIDVDM*VPSEGLWR.G        | 2 | 5.63 | 0.50 | -4.65 |
| IPI00009997 | N-acetylglucosaminyltransferase | R.EGANYALVIDVDM*VPSEGLWR.G        | 3 | 3.62 | 0.22 | -8.08 |
| IPI00009997 | N-acetylglucosaminyltransferase | R.EM*LDQSNQWGGTALVVPFAFEIR.R      | 2 | 5.70 | 0.57 | -4.16 |
| IPI00009997 | N-acetylglucosaminyltransferase | R.EM*LDQSNQWGGTALVVPFAFEIR.R      | 3 | 5.88 | 0.48 | -5.31 |
| IPI00009997 | N-acetylglucosaminyltransferase | R.EM*LDQSNQWGGTALVVPFAFEIR.A      | 3 | 3.68 | 0.45 | -5.77 |

|             |                                                                |                                     |   |      |      |       |
|-------------|----------------------------------------------------------------|-------------------------------------|---|------|------|-------|
| IPI00009997 | N-acetyllactosaminide beta-1,3-N-acetylglucosaminyltransferase | R.EPGEFALLR.S                       | 1 | 1.77 | 0.28 | -2.83 |
| IPI00009997 | N-acetyllactosaminide beta-1,3-N-acetylglucosaminyltransferase | R.EPGEFALLR.S                       | 2 | 2.11 | 0.18 | -3.02 |
| IPI00009997 | N-acetyllactosaminide beta-1,3-N-acetylglucosaminyltransferase | R.FRQYGFNR.I                        | 2 | 2.57 | 0.07 | -3.48 |
| IPI00009997 | N-acetyllactosaminide beta-1,3-N-acetylglucosaminyltransferase | R.GLREM*LDQSNQWGGTALVVPAFEIRR.A     | 4 | 3.13 | 0.19 | -4.01 |
| IPI00009997 | N-acetyllactosaminide beta-1,3-N-acetylglucosaminyltransferase | R.ISQACELHVAGDFEVLNEGFLVHK.G        | 3 | 7.22 | 0.56 | -5.55 |
| IPI00009997 | N-acetyllactosaminide beta-1,3-N-acetylglucosaminyltransferase | R.ISQACELHVAGDFEVLNEGFLVHK.G        | 4 | 5.08 | 0.46 | -4.50 |
| IPI00009997 | N-acetyllactosaminide beta-1,3-N-acetylglucosaminyltransferase | R.PAYVVPWQDPWEPFYVAGGK.V            | 2 | 3.94 | 0.26 | -1.54 |
| IPI00009997 | N-acetyllactosaminide beta-1,3-N-acetylglucosaminyltransferase | R.SCQEVFDK.L                        | 1 | 2.30 | 0.20 | -3.35 |
| IPI00009997 | N-acetyllactosaminide beta-1,3-N-acetylglucosaminyltransferase | R.SCQEVFDK.L                        | 2 | 2.62 | 0.17 | -1.74 |
| IPI00009997 | N-acetyllactosaminide beta-1,3-N-acetylglucosaminyltransferase | R.SCQEVFDKLAR.V                     | 2 | 3.82 | 0.35 | -3.80 |
| IPI00009997 | N-acetyllactosaminide beta-1,3-N-acetylglucosaminyltransferase | R.SCQEVFDKLAR.V                     | 3 | 3.67 | 0.34 | -2.85 |
| IPI00009997 | N-acetyllactosaminide beta-1,3-N-acetylglucosaminyltransferase | R.TALASGGVLDASGDYR.V                | 1 | 3.93 | 0.58 | -3.61 |
| IPI00009997 | N-acetyllactosaminide beta-1,3-N-acetylglucosaminyltransferase | R.TALASGGVLDASGDYR.V                | 2 | 5.67 | 0.57 | -8.41 |
| IPI00009997 | N-acetyllactosaminide beta-1,3-N-acetylglucosaminyltransferase | R.TALASGGVLDASGDYR.V                | 3 | 4.68 | 0.44 | -3.36 |
| IPI00009997 | N-acetyllactosaminide beta-1,3-N-acetylglucosaminyltransferase | R.VAM*HLVCPSTRYEAAVPDPREPGEFALLR.S  | 3 | 2.78 | 0.25 | -3.84 |
| IPI00009997 | N-acetyllactosaminide beta-1,3-N-acetylglucosaminyltransferase | R.WEGPLSVSVFAATK.E                  | 2 | 4.24 | 0.56 | -4.64 |
| IPI00009997 | N-acetyllactosaminide beta-1,3-N-acetylglucosaminyltransferase | R.WVNLPEESLLR.P                     | 2 | 3.22 | 0.14 | -2.20 |
| IPI00009997 | N-acetyllactosaminide beta-1,3-N-acetylglucosaminyltransferase | R.WVNLPEESLLRPAYVVPWQDPWEPFYVAGGK.V | 3 | 5.98 | 0.46 | -6.26 |
| IPI00009997 | N-acetyllactosaminide beta-1,3-N-acetylglucosaminyltransferase | R.WVNLPEESLLRPAYVVPWQDPWEPFYVAGGK.V | 4 | 5.81 | 0.50 | -5.93 |
| IPI00009997 | N-acetyllactosaminide beta-1,3-N-acetylglucosaminyltransferase | R.YEAAVPDPR.E                       | 1 | 1.53 | 0.23 | -4.42 |
| IPI00009997 | N-acetyllactosaminide beta-1,3-N-acetylglucosaminyltransferase | R.YEAAVPDPR.E                       | 2 | 3.22 | 0.42 | -3.35 |

|             |                                                                |                                    |   |      |      |       |
|-------------|----------------------------------------------------------------|------------------------------------|---|------|------|-------|
| IPI00009997 | N-acetyllactosaminide beta-1,3-N-acetylglucosaminyltransferase | R.YEAAVDPREPGEFALLR.S              | 2 | 3.18 | 0.37 | -3.93 |
| IPI00009997 | N-acetyllactosaminide beta-1,3-N-acetylglucosaminyltransferase | R.YEAAVDPREPGEFALLR.S              | 3 | 2.73 | 0.38 | -3.68 |
| IPI00009997 | N-acetyllactosaminide beta-1,3-N-acetylglucosaminyltransferase | W.EPFYVAGGK.V                      | 1 | 2.34 | 0.25 | -3.05 |
| IPI00009997 | N-acetyllactosaminide beta-1,3-N-acetylglucosaminyltransferase | W.GGTALVVPAFEIR.R                  | 2 | 3.71 | 0.36 | -6.82 |
| IPI00009997 | N-acetyllactosaminide beta-1,3-N-acetylglucosaminyltransferase | W.VNLPEESLLRPAYVVPWQDPWEFPYVAGGK.V | 3 | 4.81 | 0.14 | -7.05 |
| IPI00009997 | N-acetyllactosaminide beta-1,3-N-acetylglucosaminyltransferase | Y.LSLLSGLHGQEEQDQYFEFFPPSPR.S      | 2 | 5.28 | 0.56 | -1.48 |
| IPI00009997 | N-acetyllactosaminide beta-1,3-N-acetylglucosaminyltransferase | Y.LSLLSGLHGQEEQDQYFEFFPPSPR.S      | 3 | 4.89 | 0.47 | -1.58 |
| IPI00010118 | Isoform 1 of Prostate tumor overexpressed gene 1 protein       | R.AVRSRWPASPR.G                    | 2 | 2.25 | 0.11 |       |
| IPI00010133 | Coronin-1A                                                     | R.AAPEASGTPSSDAVSR.L               | 2 | 4.19 | 0.46 | -3.89 |
| IPI00010148 | Brain-specific polypeptide PEP-19                              | K.KVQEEFDIDM*DAPETER.A             | 2 | 5.10 | 0.52 | -2.54 |
| IPI00010148 | Brain-specific polypeptide PEP-19                              | K.KVQEEFDIDM*DAPETER.A             | 3 | 3.72 | 0.33 | -2.09 |
| IPI00010148 | Brain-specific polypeptide PEP-19                              | K.VQEEFDIDM*DAPETER.A              | 2 | 3.51 | 0.34 | 2.00  |
| IPI00010148 | Brain-specific polypeptide PEP-19                              | R.AAVAIQSQFR.K                     | 2 | 3.48 | 0.27 | -2.88 |
| IPI00010154 | Rab GDP dissociation inhibitor alpha                           | K.FDLGQDVIDFTGHALALYR.T            | 2 | 4.85 | 0.52 | -4.24 |
| IPI00010154 | Rab GDP dissociation inhibitor alpha                           | K.FDLGQDVIDFTGHALALYR.T            | 3 | 4.02 | 0.36 | -3.60 |
| IPI00010154 | Rab GDP dissociation inhibitor alpha                           | K.FLM*ANGQLVK.M                    | 2 | 2.34 | 0.08 | -0.96 |
| IPI00010154 | Rab GDP dissociation inhibitor alpha                           | K.FLVFVANFDENDPK.T                 | 2 | 3.64 | 0.43 | -1.20 |
| IPI00010154 | Rab GDP dissociation inhibitor alpha                           | K.FLVFVANFDENDPKTFEGVDPQTSM*R.D    | 3 | 4.10 | 0.43 | -3.51 |
| IPI00010154 | Rab GDP dissociation inhibitor alpha                           | K.IYKVPSTETEALASNLM*GM*FEK.R       | 3 | 4.31 | 0.31 | -1.86 |
| IPI00010154 | Rab GDP dissociation inhibitor alpha                           | K.LYSESLAR.Y                       | 1 | 1.68 | 0.11 | -2.03 |
| IPI00010154 | Rab GDP dissociation inhibitor alpha                           | K.LYSESLAR.Y                       | 2 | 2.53 | 0.20 | -3.09 |
| IPI00010154 | Rab GDP dissociation inhibitor alpha                           | K.NTNDANSCQIIPQNVNR.K              | 2 | 3.37 | 0.33 | -3.67 |
| IPI00010154 | Rab GDP dissociation inhibitor alpha                           | K.QLICDPSYIPDR.V                   | 2 | 3.11 | 0.27 | -1.90 |
| IPI00010154 | Rab GDP dissociation inhibitor alpha                           | K.SPYLYPLYGLGELPQGFAR.L            | 2 | 6.04 | 0.56 | -4.21 |
| IPI00010154 | Rab GDP dissociation inhibitor alpha                           | K.SPYLYPLYGLGELPQGFAR.L            | 3 | 4.46 | 0.33 | -4.06 |
| IPI00010154 | Rab GDP dissociation inhibitor alpha                           | K.TFEGVDPQTSM*R.D                  | 2 | 2.51 | 0.19 | -0.38 |
| IPI00010154 | Rab GDP dissociation inhibitor alpha                           | K.VLHM*DRNPYYGGESSITPLEELYKR.F     | 3 | 6.68 | 0.49 | -1.27 |
| IPI00010154 | Rab GDP dissociation inhibitor alpha                           | K.VLHM*DRNPYYGGESSITPLEELYKR.F     | 4 | 3.92 | 0.33 | -0.83 |
| IPI00010154 | Rab GDP dissociation inhibitor alpha                           | K.VVEGSFVYKGGK.I                   | 2 | 2.70 | 0.34 | -2.89 |
| IPI00010154 | Rab GDP dissociation inhibitor alpha                           | R.IKLYSESLAR.Y                     | 1 | 2.49 | 0.27 | -1.77 |
| IPI00010154 | Rab GDP dissociation inhibitor alpha                           | R.IKLYSESLAR.Y                     | 2 | 2.49 | 0.18 | -1.31 |
| IPI00010154 | Rab GDP dissociation inhibitor alpha                           | R.KFDLGQDVIDFTGHALALYR.T           | 2 | 4.71 | 0.49 | -7.20 |
| IPI00010154 | Rab GDP dissociation inhibitor alpha                           | R.KFDLGQDVIDFTGHALALYR.T           | 3 | 7.26 | 0.56 | -6.47 |
| IPI00010154 | Rab GDP dissociation inhibitor alpha                           | R.KFDLGQDVIDFTGHALALYR.T           | 4 | 5.53 | 0.42 | -3.92 |



|             |                                                                  |                                         |   |      |      |       |
|-------------|------------------------------------------------------------------|-----------------------------------------|---|------|------|-------|
| IPI00010154 | Rab GDP dissociation inhibitor alpha                             | R.KQNDVFGAEQ.-                          | 2 | 3.55 | 0.31 | -0.90 |
| IPI00010154 | Rab GDP dissociation inhibitor alpha                             | R.NPYYGESSITPLEELYKR.F                  | 3 | 3.75 | 0.38 | -2.90 |
| IPI00010154 | Rab GDP dissociation inhibitor alpha                             | R.TDDYLDQPCLLETVNR.I                    | 2 | 4.51 | 0.43 | -4.37 |
| IPI00010182 | Isoform a 1 of Acyl-CoA-binding protein                          | K.AYINKVEELK.K                          | 2 | 2.97 | 0.23 | -2.52 |
| IPI00010182 | Isoform a 1 of Acyl-CoA-binding protein                          | K.AYINKVEELKK.K                         | 2 | 2.71 | 0.14 | -2.90 |
| IPI00010182 | Isoform a 1 of Acyl-CoA-binding protein                          | K.QATVGDINTERPGM*LDFTGK.A               | 2 | 3.04 | 0.40 | -3.06 |
| IPI00010182 | Isoform a 1 of Acyl-CoA-binding protein                          | K.QATVGDINTERPGM*LDFTGK.A               | 3 | 2.34 | 0.11 | -3.00 |
| IPI00010193 | Isoform 1 of Interferon-alpha/beta receptor beta chain precursor | G.ISYDSPDYTDESCTFK.I                    | 2 | 3.61 | 0.45 | -6.76 |
| IPI00010207 | Ubiquitin-fold modifier 1 precursor                              | K.FAAEEFKVPAATSAAITNDGIGINPAQTAGNVFLK.H | 3 | 4.89 | 0.45 | -2.51 |
| IPI00010295 | Carboxypeptidase N catalytic chain precursor                     | K.GM*VLDENYNLANAVISVSGINHDTVSGDHGDYFR.L | 4 | 5.54 | 0.47 | -2.76 |
| IPI00010295 | Carboxypeptidase N catalytic chain precursor                     | K.VQNECPGTR.V                           | 2 | 2.53 | 0.18 |       |
| IPI00010295 | Carboxypeptidase N catalytic chain precursor                     | R.EALIQFLEQVHQGIK.G                     | 2 | 4.53 | 0.38 | -2.81 |
| IPI00010295 | Carboxypeptidase N catalytic chain precursor                     | R.EALIQFLEQVHQGIK.G                     | 3 | 2.47 | 0.23 | -1.82 |
| IPI00010295 | Carboxypeptidase N catalytic chain precursor                     | R.HLYVLEFSDHPGIHEPLEPEVK.Y              | 3 | 3.98 | 0.46 | -1.75 |
| IPI00010295 | Carboxypeptidase N catalytic chain precursor                     | R.HLYVLEFSDHPGIHEPLEPEVK.Y              | 4 | 3.87 | 0.39 | -1.04 |
| IPI00010295 | Carboxypeptidase N catalytic chain precursor                     | R.IHILPSM*NPDGYEVAQAQGNKPGYLVR.N        | 3 | 2.98 | 0.29 | -4.11 |
| IPI00010295 | Carboxypeptidase N catalytic chain precursor                     | R.IVQLIQDTR.I                           | 2 | 3.27 | 0.09 | -1.89 |
| IPI00010295 | Carboxypeptidase N catalytic chain precursor                     | R.NFPDLNTYIYYNEK.Y                      | 2 | 2.39 | 0.10 | -4.93 |
| IPI00010295 | Carboxypeptidase N catalytic chain precursor                     | R.NNANGVDLNR.N                          | 2 | 2.96 | 0.28 | -0.81 |
| IPI00010303 | Serpin B4                                                        | K.FM*FDLQQFR.K                          | 2 | 3.04 | 0.27 | -3.22 |
| IPI00010343 | Sodium/calcium exchanger 2 precursor                             | K.AGSDYEYSEGLVFKPGETQK.E                | 3 | 2.84 | 0.13 | -3.78 |
| IPI00010343 | Sodium/calcium exchanger 2 precursor                             | R.LVAPLLATVTILDDDH.A                    | 2 | 4.59 | 0.58 | -3.90 |
| IPI00010343 | Sodium/calcium exchanger 2 precursor                             | R.LVAPLLATVTILDDDH.A                    | 3 | 4.15 | 0.33 | -2.47 |
| IPI00010346 | Neurolysin, mitochondrial precursor                              | K.EVRAASTEADKRLSRFDIEMSMRGDIFER.I       | 3 | 3.04 | 0.14 |       |
| IPI00010348 | Deoxyribonuclease-2-alpha precursor                              | A.LTCYGDSGQPVDWVYVYK.L                  | 2 | 4.82 | 0.55 | -3.34 |
| IPI00010348 | Deoxyribonuclease-2-alpha precursor                              | A.LTCYGDSGQPVDWVYVYKLPALR.G             | 3 | 3.98 | 0.39 | -2.21 |
| IPI00010348 | Deoxyribonuclease-2-alpha precursor                              | K.QLTYTYPWVYNYQLEGIFAQEFPLENVVK.G       | 3 | 4.88 | 0.46 | -1.91 |
| IPI00010348 | Deoxyribonuclease-2-alpha precursor                              | R.ALINSPEGAVGR.S                        | 2 | 2.60 | 0.27 | -3.89 |
| IPI00010348 | Deoxyribonuclease-2-alpha precursor                              | R.GGGTLCAQLPALWK.A                      | 2 | 3.36 | 0.25 | -2.20 |
| IPI00010360 | Isoform 1 of Collagen alpha-3(IV) chain precursor                | K.CGDPGLPGPDGEPGIPGIFGPPGPKGDQGFPGTK.G  | 3 | 1.53 | 0.12 | -2.70 |
| IPI00010369 | Testis-expressed sequence 15 protein                             | K.LQDLTLR.D                             | 2 | 2.33 | 0.09 | -3.01 |
| IPI00010381 | VPS10 domain-containing receptor SorCS3 precursor                | K.LYDFNLGSVTESSLWR.S                    | 2 | 4.46 | 0.55 | -4.31 |
| IPI00010381 | VPS10 domain-containing receptor SorCS3 precursor                | R.AGPELLPQQGGGR.G                       | 1 | 2.08 | 0.16 | -1.84 |
| IPI00010381 | VPS10 domain-containing receptor SorCS3 precursor                | R.AGPELLPQQGGGR.G                       | 2 | 3.87 | 0.26 | -3.06 |
| IPI00010381 | VPS10 domain-containing receptor SorCS3 precursor                | R.GGEM*QVEAGGTSPAGER.R                  | 2 | 5.18 | 0.46 | -2.98 |
| IPI00010381 | VPS10 domain-containing receptor SorCS3 precursor                | R.GGEM*QVEAGGTSPAGER.R                  | 3 | 2.46 | 0.13 | -2.80 |

|             |                                                                               |                                              |   |      |      |       |
|-------------|-------------------------------------------------------------------------------|----------------------------------------------|---|------|------|-------|
| IPI00010381 | VPS10 domain-containing receptor SorCS3 precursor                             | R.GGEM*QVEAGGTSPAGERR.G                      | 3 | 3.32 | 0.34 | -3.02 |
| IPI00010381 | VPS10 domain-containing receptor SorCS3 precursor                             | R.GIYFTLAM*ENIK.S                            | 2 | 3.02 | 0.37 | -1.42 |
| IPI00010381 | VPS10 domain-containing receptor SorCS3 precursor                             | R.IQECAETTR.S                                | 2 | 2.75 | 0.26 | -4.73 |
| IPI00010381 | VPS10 domain-containing receptor SorCS3 precursor                             | R.RAGPELLPQQGGGR.G                           | 2 | 3.97 | 0.46 | -2.59 |
| IPI00010381 | VPS10 domain-containing receptor SorCS3 precursor                             | R.RAGPELLPQQGGGR.G                           | 3 | 3.49 | 0.22 | -0.76 |
| IPI00010381 | VPS10 domain-containing receptor SorCS3 precursor                             | R.STDYGTTYEK.L                               | 2 | 3.12 | 0.29 | -2.90 |
| IPI00010381 | VPS10 domain-containing receptor SorCS3 precursor                             | R.STDYGTTYEKLNDK.V                           | 2 | 3.71 | 0.51 | 0.07  |
| IPI00010381 | VPS10 domain-containing receptor SorCS3 precursor                             | R.VPFVAIR.N                                  | 2 | 1.86 | 0.12 | -2.70 |
| IPI00010402 | Putative uncharacterized protein                                              | R.IQYQLVDISQDNALRDEM*R.A                     | 2 | 2.76 | 0.39 | -2.84 |
| IPI00010402 | Putative uncharacterized protein                                              | R.IQYQLVDISQDNALRDEM*R.A                     | 3 | 2.49 | 0.10 | -1.24 |
| IPI00010402 | Putative uncharacterized protein                                              | R.VYSTSVTGSR.E                               | 1 | 1.89 | 0.15 | -2.82 |
| IPI00010402 | Putative uncharacterized protein                                              | R.VYSTSVTGSR.E                               | 2 | 3.98 | 0.45 | -3.05 |
| IPI00010405 | Isoform Long of Tyrosine-protein kinase transmembrane receptor ROR1 precursor | R.DLCRDECEILENVLCQTEYIFAR.S                  | 3 | 3.54 | 0.38 | -3.97 |
| IPI00010442 | Phospholemman precursor                                                       | R.TGEPDEEEGTFR.S                             | 2 | 1.51 | 0.16 | -0.07 |
| IPI00010470 | Isoform SNAP-25b of Synaptosomal-associated protein 25                        | A.LDM*GNEIDTQNR.Q                            | 2 | 3.42 | 0.32 | -1.32 |
| IPI00010470 | Isoform SNAP-25b of Synaptosomal-associated protein 25                        | L.DM*GNEIDTQNR.Q                             | 2 | 3.73 | 0.33 | -3.83 |
| IPI00010470 | Isoform SNAP-25b of Synaptosomal-associated protein 25                        | R.RADQLADESLESTRR.M                          | 3 | 3.48 | 0.21 | -2.21 |
| IPI00010471 | Plastin-2                                                                     | K.AYYHLLQVAPKGDEEGVPAVVIDM*SGLR.E            | 4 | 2.45 | 0.16 | -0.83 |
| IPI00010471 | Plastin-2                                                                     | K.FSLVGIGGQDLNEG NR.T                        | 2 | 4.65 | 0.46 | -2.91 |
| IPI00010471 | Plastin-2                                                                     | K.IGNFSTDIKDSK.A                             | 3 | 2.09 | 0.17 | -3.35 |
| IPI00010471 | Plastin-2                                                                     | K.ISTSLPVLDLIDAIQPGSINYDLLK.T                | 2 | 3.21 | 0.41 | -3.69 |
| IPI00010471 | Plastin-2                                                                     | K.ISTSLPVLDLIDAIQPGSINYDLLK.T                | 3 | 5.65 | 0.35 | -2.05 |
| IPI00010471 | Plastin-2                                                                     | K.ISTSLPVLDLIDAIQPGSINYDLLKTENLNDDEKL NNAK.Y | 3 | 3.87 | 0.46 | -4.10 |
| IPI00010471 | Plastin-2                                                                     | K.ISTSLPVLDLIDAIQPGSINYDLLKTENLNDDEKL NNAK.Y | 4 | 3.53 | 0.22 | -4.31 |
| IPI00010471 | Plastin-2                                                                     | K.M*INLSVPDTIDER.T                           | 2 | 3.99 | 0.32 | -2.96 |
| IPI00010471 | Plastin-2                                                                     | K.TENLNDDEKL NNAK.Y                          | 2 | 4.88 | 0.30 | -2.44 |
| IPI00010471 | Plastin-2                                                                     | K.VTDGNGYISFNE L NDLFK.A                     | 2 | 2.41 | 0.26 | -5.10 |
| IPI00010471 | Plastin-2                                                                     | R.VNHLYSDLSDALVIFQLYEK.I                     | 3 | 2.58 | 0.15 | -3.35 |
| IPI00010471 | Plastin-2                                                                     | R.VYALPEDLVEV NPK.M                          | 2 | 3.42 | 0.33 | -3.38 |
| IPI00010575 | KIAA1466 protein                                                              | -.M*QGDSKFSSQGTGPPYQDLSTK.S                  | 2 | 2.49 | 0.10 |       |

|             |                                                                       |                                   |   |      |      |       |
|-------------|-----------------------------------------------------------------------|-----------------------------------|---|------|------|-------|
| IPI00010706 | Glutathione synthetase                                                | K.EGIAQTVFLGLNR.S                 | 2 | 3.53 | 0.33 | -3.31 |
| IPI00010706 | Glutathione synthetase                                                | K.QIEINTISASFGGLASR.T             | 2 | 4.27 | 0.55 | -4.02 |
| IPI00010706 | Glutathione synthetase                                                | K.VQQLSRPGM*LEM*LLPGQPEAVAR.L     | 3 | 2.81 | 0.13 | -2.55 |
| IPI00010706 | Glutathione synthetase                                                | R.AIENELLAR.N                     | 2 | 2.33 | 0.18 | -2.39 |
| IPI00010737 | Thrombomodulin precursor                                              | R.SSVAADVISLLLNGDGGVGR.R          | 3 | 3.50 | 0.25 | -3.06 |
| IPI00010790 | Biglycan precursor                                                    | K.EISPDITLLDLQNNDISLRK.D          | 3 | 2.95 | 0.39 | -4.80 |
| IPI00010790 | Biglycan precursor                                                    | K.IQAILEDLLR.Y                    | 2 | 3.39 | 0.14 | -3.56 |
| IPI00010790 | Biglycan precursor                                                    | R.ELHLDNNK.L                      | 1 | 2.93 | 0.07 | -4.09 |
| IPI00010790 | Biglycan precursor                                                    | R.LGLGHNQIR.M                     | 2 | 2.18 | 0.08 | -2.21 |
| IPI00010790 | Biglycan precursor                                                    | R.VVQCSDLGLK.S                    | 2 | 3.11 | 0.37 | -2.78 |
| IPI00010796 | Protein disulfide-isomerase precursor                                 | K.LKAEGSEIR.L                     | 2 | 2.26 | 0.10 | 0.99  |
| IPI00010796 | Protein disulfide-isomerase precursor                                 | K.M*DSTANEVEAVK.V                 | 2 | 3.79 | 0.41 | -3.88 |
| IPI00010796 | Protein disulfide-isomerase precursor                                 | K.QFLQAAEAIDDIPFGITSNSDVFVSK.Y    | 3 | 4.12 | 0.41 | -4.17 |
| IPI00010796 | Protein disulfide-isomerase precursor                                 | K.VDATEESDLAQQYGVR.G              | 2 | 4.48 | 0.43 | -4.66 |
| IPI00010796 | Protein disulfide-isomerase precursor                                 | K.VDATEESDLAQQYGVR.G              | 3 | 2.42 | 0.12 | -2.37 |
| IPI00010796 | Protein disulfide-isomerase precursor                                 | K.YKPESEELTAER.I                  | 2 | 2.68 | 0.16 | -2.87 |
| IPI00010796 | Protein disulfide-isomerase precursor                                 | K.YQLDKDGVVLFK.K                  | 3 | 2.92 | 0.40 | -1.59 |
| IPI00010796 | Protein disulfide-isomerase precursor                                 | K.YQLDKDGVVLFK.F                  | 3 | 2.67 | 0.25 | 0.23  |
| IPI00010796 | Protein disulfide-isomerase precursor                                 | R.ILEFFGLK.K                      | 2 | 2.39 | 0.20 | -1.69 |
| IPI00010796 | Protein disulfide-isomerase precursor                                 | R.NNFEGETVKENLLDFIK.H             | 3 | 3.18 | 0.27 | -2.91 |
| IPI00010796 | Protein disulfide-isomerase precursor                                 | R.TGPAATTLPGAAAESLVESSEVAVIGFFK.D | 3 | 4.50 | 0.49 | -8.44 |
| IPI00010808 | Interferon-gamma receptor alpha chain precursor                       | R.VYNVYVR.M                       | 1 | 1.76 | 0.11 | -0.70 |
| IPI00010810 | Electron transfer flavoprotein subunit alpha, mitochondrial precursor | K.TIVAINKDPEAPIFQVADYGVADLFK.V    | 3 | 4.00 | 0.45 | -4.50 |
| IPI00010810 | Electron transfer flavoprotein subunit alpha, mitochondrial precursor | R.GTSFDAAATSGGSASSEK.A            | 2 | 1.98 | 0.12 | -3.20 |
| IPI00010863 | Copper transport protein ATOX1                                        | K.LGGVKYDIDLPNKK.V                | 3 | 3.65 | 0.26 | -0.43 |
| IPI00010895 | Tubby-related protein 2                                               | K.GEGGTDSDHM*R.H                  | 2 | 2.07 | 0.17 |       |
| IPI00010896 | Chloride intracellular channel protein 1                              | K.LAALNPESNTAGLDIFAK.F            | 2 | 5.14 | 0.57 | -4.16 |
| IPI00010896 | Chloride intracellular channel protein 1                              | K.NSNPALNDNLEK.G                  | 2 | 3.15 | 0.43 | -1.76 |
| IPI00010896 | Chloride intracellular channel protein 1                              | K.VLDNYLTSPLPEEVDETSAEDEGVSR.K    | 3 | 3.30 | 0.37 | -3.29 |
| IPI00010903 | Dopey family member 1                                                 | K.IIGPKRLAK.D                     | 2 | 1.25 | 0.06 | -1.31 |
| IPI00010949 | Isoform 1 of Sialate O-acetyltransferase precursor                    | K.KSSDDGFPQIR.W                   | 2 | 3.27 | 0.24 | -2.55 |
| IPI00010949 | Isoform 1 of Sialate O-acetyltransferase precursor                    | K.M*PNTFM*AVAM*DLCDRDSFPGSIHPR.D  | 4 | 4.46 | 0.47 | -2.56 |
| IPI00010949 | Isoform 1 of Sialate O-acetyltransferase precursor                    | K.QGSIPYDSVTGPSK.H                | 2 | 2.94 | 0.38 | -3.66 |
| IPI00010949 | Isoform 1 of Sialate O-acetyltransferase precursor                    | K.SSDGFPQIR.W                     | 2 | 2.78 | 0.24 | -3.34 |
| IPI00010949 | Isoform 1 of Sialate O-acetyltransferase precursor                    | K.YM*SAVCWLFR.H                   | 2 | 3.14 | 0.46 | -3.40 |
| IPI00010949 | Isoform 1 of Sialate O-acetyltransferase precursor                    | R.DKQTVAYR.L                      | 2 | 2.30 | 0.23 | -1.98 |
| IPI00010949 | Isoform 1 of Sialate O-acetyltransferase precursor                    | R.ELSNTAAYQSVR.I                  | 2 | 3.91 | 0.36 | -2.76 |
| IPI00010949 | Isoform 1 of Sialate O-acetyltransferase precursor                    | R.FASYINNDM*VLQK.E                | 2 | 3.75 | 0.38 | -2.61 |
| IPI00010949 | Isoform 1 of Sialate O-acetyltransferase precursor                    | R.FFPFGLVQLSSDSLK.K               | 2 | 5.45 | 0.46 | -4.32 |
| IPI00010949 | Isoform 1 of Sialate O-acetyltransferase precursor                    | R.FFPFGLVQLSSDSLK.K               | 3 | 4.01 | 0.37 | -2.35 |

|             |                                                                  |                            |   |      |      |       |
|-------------|------------------------------------------------------------------|----------------------------|---|------|------|-------|
| IPI00010949 | Isoform 1 of Sialate O-acetyltransferase precursor               | R.FFPFGLVQLSSDLSKK.S       | 2 | 3.62 | 0.42 | -2.74 |
| IPI00010949 | Isoform 1 of Sialate O-acetyltransferase precursor               | R.YAWTTWPCEYK.Q            | 2 | 3.36 | 0.34 | -3.85 |
| IPI00011051 | T-cell leukemia homeobox protein 1                               | K.DRFTGHPYQNRTPPK.K        | 3 | 2.58 | 0.09 | -0.74 |
| IPI00011094 | Complement C1q tumor necrosis factor-related protein 4 precursor | R.NRDEVQALAFDEQR.R         | 2 | 4.05 | 0.40 | -2.58 |
| IPI00011094 | Complement C1q tumor necrosis factor-related protein 4 precursor | R.TTPLEGTSEM*AVTFDK.V      | 2 | 3.85 | 0.51 | -1.82 |
| IPI00011094 | Complement C1q tumor necrosis factor-related protein 4 precursor | R.VPGAYFFSFTAGK.A          | 2 | 3.25 | 0.54 | -4.64 |
| IPI00011140 | Protein NOV homolog precursor                                    | K.NNEAFLQELELK.T           | 2 | 4.39 | 0.33 | -4.56 |
| IPI00011140 | Protein NOV homolog precursor                                    | K.TIQAEFQCSPGQIVK.K        | 2 | 5.43 | 0.47 | -3.21 |
| IPI00011140 | Protein NOV homolog precursor                                    | R.AVLGDCSCCLVCAR.Q         | 2 | 3.90 | 0.43 | -2.62 |
| IPI00011140 | Protein NOV homolog precursor                                    | R.CPATPPTCAPGVR.A          | 2 | 2.31 | 0.06 | -1.70 |
| IPI00011140 | Protein NOV homolog precursor                                    | R.CQLDVLLPEPNCPAPR.K       | 2 | 4.49 | 0.50 | -3.50 |
| IPI00011140 | Protein NOV homolog precursor                                    | R.CQLDVLLPEPNCPAPR.K       | 3 | 2.61 | 0.13 | -3.81 |
| IPI00011140 | Protein NOV homolog precursor                                    | R.DGQIGCVPR.C              | 1 | 2.02 | 0.21 | -4.16 |
| IPI00011140 | Protein NOV homolog precursor                                    | R.DGQIGCVPR.C              | 2 | 3.15 | 0.25 | -3.12 |
| IPI00011218 | Macrophage colony-stimulating factor 1 receptor precursor        | G.IPVIEPSVPELVVKPGATVTLR.C | 2 | 4.48 | 0.56 | -4.53 |
| IPI00011218 | Macrophage colony-stimulating factor 1 receptor precursor        | G.IPVIEPSVPELVVKPGATVTLR.C | 3 | 5.24 | 0.62 | -4.46 |
| IPI00011218 | Macrophage colony-stimulating factor 1 receptor precursor        | I.PGPPALTLVPAELVR.I        | 2 | 4.45 | 0.49 | -2.59 |
| IPI00011218 | Macrophage colony-stimulating factor 1 receptor precursor        | I.PQQSDFHNNR.Y             | 2 | 2.91 | 0.36 | -3.58 |
| IPI00011218 | Macrophage colony-stimulating factor 1 receptor precursor        | K.FIQSQDYQCSALM*GGR.K      | 2 | 5.34 | 0.56 | -4.06 |
| IPI00011218 | Macrophage colony-stimulating factor 1 receptor precursor        | K.FIQSQDYQCSALM*GGR.K      | 3 | 4.49 | 0.39 | -1.07 |
| IPI00011218 | Macrophage colony-stimulating factor 1 receptor precursor        | K.LAIPQQSDFHNNR.Y          | 2 | 3.22 | 0.44 | -3.92 |
| IPI00011218 | Macrophage colony-stimulating factor 1 receptor precursor        | K.LAIPQQSDFHNNR.Y          | 3 | 2.01 | 0.16 | -3.93 |
| IPI00011218 | Macrophage colony-stimulating factor 1 receptor precursor        | K.LAIPQQSDFHNNRYQK.V       | 2 | 3.31 | 0.38 | -2.98 |
| IPI00011218 | Macrophage colony-stimulating factor 1 receptor precursor        | K.VIPGPPALTLVPAELVR.I      | 2 | 2.84 | 0.51 | -3.23 |
| IPI00011218 | Macrophage colony-stimulating factor 1 receptor precursor        | K.VIPGPPALTLVPAELVR.I      | 3 | 3.40 | 0.33 | -2.05 |
| IPI00011218 | Macrophage colony-stimulating factor 1 receptor precursor        | R.AHNSVGSWSWAFIPISAG.A     | 2 | 3.00 | 0.39 | -2.06 |

|             |                                                           |                                         |   |      |      |       |
|-------------|-----------------------------------------------------------|-----------------------------------------|---|------|------|-------|
| IPI00011218 | Macrophage colony-stimulating factor 1 receptor precursor | R.AHNSVSGSGSWAFIPISAGA.H                | 2 | 3.77 | 0.40 | -3.09 |
| IPI00011218 | Macrophage colony-stimulating factor 1 receptor precursor | R.AKFIQSQDYQCSALM*GGR.K                 | 2 | 5.43 | 0.54 | -2.79 |
| IPI00011218 | Macrophage colony-stimulating factor 1 receptor precursor | R.ALTFELTLR.Y                           | 2 | 2.55 | 0.20 | -4.48 |
| IPI00011218 | Macrophage colony-stimulating factor 1 receptor precursor | R.CDEAQLQVWDDPYPEVLSQEPFHK.V            | 3 | 5.68 | 0.36 | -3.64 |
| IPI00011218 | Macrophage colony-stimulating factor 1 receptor precursor | R.HTFTLSLPR.L                           | 1 | 2.08 | 0.08 | -3.76 |
| IPI00011218 | Macrophage colony-stimulating factor 1 receptor precursor | R.HTFTLSLPR.L                           | 2 | 2.30 | 0.28 | -3.31 |
| IPI00011218 | Macrophage colony-stimulating factor 1 receptor precursor | R.LKVQKVIPGPPALTLVPAELVR.I              | 3 | 3.60 | 0.41 | -3.76 |
| IPI00011218 | Macrophage colony-stimulating factor 1 receptor precursor | R.LKVQKVIPGPPALTLVPAELVR.I              | 4 | 2.46 | 0.29 | -3.34 |
| IPI00011218 | Macrophage colony-stimulating factor 1 receptor precursor | R.VVESAYLNLSSSEQNLIQEVTVGEGLNLK.V       | 3 | 3.24 | 0.13 | -5.25 |
| IPI00011229 | Cathepsin D precursor                                     | K.AIGAVPLIQGEYM*IPCEK.V                 | 2 | 4.27 | 0.44 | -4.05 |
| IPI00011229 | Cathepsin D precursor                                     | K.AIGAVPLIQGEYM*IPCEK.V                 | 3 | 4.47 | 0.34 | -3.05 |
| IPI00011229 | Cathepsin D precursor                                     | K.AIGAVPLIQGEYM*IPCEKVSTLPAILK.L        | 3 | 3.89 | 0.49 | -3.09 |
| IPI00011229 | Cathepsin D precursor                                     | K.AIGAVPLIQGEYM*IPCEKVSTLPAILK.L        | 4 | 3.68 | 0.33 | -2.04 |
| IPI00011229 | Cathepsin D precursor                                     | K.AYWQVHLDQVEVASGLTLCK.E                | 3 | 2.83 | 0.17 | -1.81 |
| IPI00011229 | Cathepsin D precursor                                     | K.EGCEAIVDTGTSLM*VGPVDEV.R              | 3 | 5.04 | 0.49 | -3.16 |
| IPI00011229 | Cathepsin D precursor                                     | K.FDGILGM*AYPR.I                        | 2 | 3.64 | 0.41 | -3.20 |
| IPI00011229 | Cathepsin D precursor                                     | K.GYKLSPEYTLK.V                         | 2 | 2.77 | 0.26 | -3.38 |
| IPI00011229 | Cathepsin D precursor                                     | K.LGGKGYKLSPEYTLK.V                     | 2 | 4.66 | 0.39 | -3.02 |
| IPI00011229 | Cathepsin D precursor                                     | K.LLDIACWIHHK.Y                         | 2 | 3.07 | 0.25 | -3.06 |
| IPI00011229 | Cathepsin D precursor                                     | K.LSPEDYTLK.V                           | 1 | 1.72 | 0.12 | -5.95 |
| IPI00011229 | Cathepsin D precursor                                     | K.LSPEDYTLK.V                           | 2 | 1.60 | 0.23 | -2.77 |
| IPI00011229 | Cathepsin D precursor                                     | K.LVDQNIJSFYLSR.D                       | 1 | 2.62 | 0.29 | -1.43 |
| IPI00011229 | Cathepsin D precursor                                     | K.LVDQNIJSFYLSR.D                       | 2 | 4.88 | 0.50 | -6.03 |
| IPI00011229 | Cathepsin D precursor                                     | K.LVDQNIJSFYLSR.D                       | 3 | 4.76 | 0.32 | -3.40 |
| IPI00011229 | Cathepsin D precursor                                     | K.LVDQNIJSFYLSRDPDAQPGGELM*LGGTDSK.Y    | 2 | 1.85 | 0.17 | -2.48 |
| IPI00011229 | Cathepsin D precursor                                     | K.LVDQNIJSFYLSRDPDAQPGGELM*LGGTDSK.Y    | 3 | 6.55 | 0.58 | -4.14 |
| IPI00011229 | Cathepsin D precursor                                     | K.LVDQNIJSFYLSRDPDAQPGGELM*LGGTDSK.Y    | 4 | 5.17 | 0.40 | -4.15 |
| IPI00011229 | Cathepsin D precursor                                     | K.LVDQNIJSFYLSRDPDAQPGGELM*LGGTDSKYYK.G | 4 | 4.10 | 0.33 | -3.00 |
| IPI00011229 | Cathepsin D precursor                                     | K.QPGITFIAAK.F                          | 1 | 1.41 | 0.14 | -2.79 |
| IPI00011229 | Cathepsin D precursor                                     | K.QPGITFIAAK.F                          | 2 | 1.26 | 0.15 | -1.94 |
| IPI00011229 | Cathepsin D precursor                                     | K.VSTLPAILK.L                           | 1 | 1.63 | 0.05 | -2.34 |
| IPI00011229 | Cathepsin D precursor                                     | K.VSTLPAILK.L                           | 2 | 2.57 | 0.21 | -2.55 |
| IPI00011229 | Cathepsin D precursor                                     | K.YNSDKSSTYVK.N                         | 1 | 3.33 | 0.34 | -4.12 |

|             |                                               |                                    |   |      |      |       |
|-------------|-----------------------------------------------|------------------------------------|---|------|------|-------|
| IPI00011229 | Cathepsin D precursor                         | K.YNSDKSSTYVK.N                    | 2 | 3.40 | 0.38 | -5.04 |
| IPI00011229 | Cathepsin D precursor                         | K.YNSDKSSTYVK.N                    | 3 | 1.54 | 0.15 | -2.42 |
| IPI00011229 | Cathepsin D precursor                         | K.YSQAVPAVTEGPIPEVLK.N             | 2 | 5.02 | 0.57 | -4.82 |
| IPI00011229 | Cathepsin D precursor                         | R.DNNRVGFAEAAAR.L                  | 3 | 3.75 | 0.38 | -2.45 |
| IPI00011229 | Cathepsin D precursor                         | R.DPDAQPGGELM*LGGTDSK.Y            | 2 | 5.39 | 0.51 | -2.93 |
| IPI00011229 | Cathepsin D precursor                         | R.DPDAQPGGELM*LGGTDSK.Y            | 3 | 4.78 | 0.39 | -1.60 |
| IPI00011229 | Cathepsin D precursor                         | R.ISVNNVLPVFDNLM*QQK.L             | 2 | 4.71 | 0.49 | -6.38 |
| IPI00011229 | Cathepsin D precursor                         | R.ISVNNVLPVFDNLM*QQK.L             | 3 | 5.83 | 0.51 | -4.13 |
| IPI00011229 | Cathepsin D precursor                         | R.QVFGAATK.Q                       | 1 | 1.97 | 0.08 | -2.72 |
| IPI00011229 | Cathepsin D precursor                         | R.QVFGAATK.Q                       | 2 | 1.85 | 0.11 | -2.50 |
| IPI00011229 | Cathepsin D precursor                         | R.QVFGAATKQPGITFIAAK.F             | 2 | 3.89 | 0.42 | -2.88 |
| IPI00011229 | Cathepsin D precursor                         | R.QVFGAATKQPGITFIAAK.F             | 3 | 3.55 | 0.37 | -2.60 |
| IPI00011229 | Cathepsin D precursor                         | R.QVFGAATKQPGITFIAAKFDGILGM*AYPR.I | 4 | 3.19 | 0.15 | -4.70 |
| IPI00011229 | Cathepsin D precursor                         | R.RTM*SEVGGSVEDLIAK.G              | 3 | 4.27 | 0.43 | -0.64 |
| IPI00011229 | Cathepsin D precursor                         | R.TM*SEVGGSVEDLIAK.G               | 2 | 4.91 | 0.56 | -3.55 |
| IPI00011229 | Cathepsin D precursor                         | R.TM*SEVGGSVEDLIAK.G               | 3 | 3.92 | 0.28 | -0.88 |
| IPI00011229 | Cathepsin D precursor                         | R.TM*SEVGGSVEDLIAKGPVSK.Y          | 2 | 3.77 | 0.12 | -2.84 |
| IPI00011229 | Cathepsin D precursor                         | R.TM*SEVGGSVEDLIAKGPVSK.Y          | 3 | 3.16 | 0.32 | -1.53 |
| IPI00011229 | Cathepsin D precursor                         | R.VGFAEAAAR.L                      | 1 | 2.36 | 0.11 | -2.75 |
| IPI00011229 | Cathepsin D precursor                         | R.VGFAEAAAR.L                      | 2 | 2.98 | 0.19 | -3.84 |
| IPI00011229 | Cathepsin D precursor                         | R.VGFAEAAARL.-                     | 1 | 2.08 | 0.15 | -2.80 |
| IPI00011229 | Cathepsin D precursor                         | R.VGFAEAAARL.-                     | 2 | 3.21 | 0.23 | -3.49 |
| IPI00011229 | Cathepsin D precursor                         | R.YYTVFDR.D                        | 1 | 2.10 | 0.09 | -2.86 |
| IPI00011229 | Cathepsin D precursor                         | R.YYTVFDR.D                        | 2 | 2.12 | 0.16 | -1.75 |
| IPI00011252 | Complement component C8 alpha chain precursor | K.AKM*ESLGITSR.D                   | 2 | 2.90 | 0.25 | -0.38 |
| IPI00011252 | Complement component C8 alpha chain precursor | K.AM*AVEDIISR.V                    | 1 | 1.25 | 0.23 | -3.71 |
| IPI00011252 | Complement component C8 alpha chain precursor | K.M*ESLGITSR.D                     | 2 | 2.83 | 0.15 | -1.66 |
| IPI00011252 | Complement component C8 alpha chain precursor | K.YHFEALADTGISSEFYDNANDLLSK.V      | 2 | 6.48 | 0.68 | -2.76 |
| IPI00011252 | Complement component C8 alpha chain precursor | K.YHFEALADTGISSEFYDNANDLLSK.V      | 3 | 6.62 | 0.58 | -5.36 |
| IPI00011252 | Complement component C8 alpha chain precursor | K.YNPVVIDFEM*QPIHEVLR.H            | 2 | 5.08 | 0.53 | -3.20 |
| IPI00011252 | Complement component C8 alpha chain precursor | K.YNPVVIDFEM*QPIHEVLR.H            | 3 | 2.52 | 0.15 | -4.02 |
| IPI00011252 | Complement component C8 alpha chain precursor | Q.AQCGQDFQCK.E                     | 2 | 3.60 | 0.41 | 0.77  |
| IPI00011252 | Complement component C8 alpha chain precursor | R.AIDEDCSQYEPIPGSQK.A              | 2 | 4.48 | 0.54 | -3.65 |
| IPI00011252 | Complement component C8 alpha chain precursor | R.AIDEDCSQYEPIPGSQK.A              | 3 | 3.50 | 0.31 | -2.39 |
| IPI00011252 | Complement component C8 alpha chain precursor | R.ALDQYLM*EFNACR.C                 | 2 | 4.70 | 0.46 | -2.22 |
| IPI00011252 | Complement component C8 alpha chain precursor | R.ECDNPAPQNGGASCPGR.K              | 2 | 3.21 | 0.57 | -3.20 |
| IPI00011252 | Complement component C8 alpha chain precursor | R.HTSLGPLEAK.R                     | 2 | 2.18 | 0.35 | -1.35 |
| IPI00011252 | Complement component C8 alpha chain precursor | R.HTSLGPLEAKR.Q                    | 3 | 2.41 | 0.28 | -5.51 |
| IPI00011252 | Complement component C8 alpha chain precursor | R.KAM*AVEDIISR.V                   | 2 | 3.31 | 0.33 | -1.47 |
| IPI00011252 | Complement component C8 alpha chain precursor | R.KAM*AVEDIISR.V                   | 3 | 2.63 | 0.06 | -3.42 |
| IPI00011252 | Complement component C8 alpha chain precursor | R.LGSLGAACEQTQTEGAK.A              | 2 | 4.39 | 0.45 | 0.38  |
| IPI00011252 | Complement component C8 alpha chain precursor | R.LYYGDDEKYFR.K                    | 2 | 3.22 | 0.39 | -2.64 |

|             |                                                 |                                             |   |      |      |       |
|-------------|-------------------------------------------------|---------------------------------------------|---|------|------|-------|
| IPI00011252 | Complement component C8 alpha chain precursor   | R.LYYGDDEKYFR.K                             | 3 | 1.92 | 0.24 | -1.81 |
| IPI00011252 | Complement component C8 alpha chain precursor   | R.QAQCGQDFQCK.E                             | 2 | 3.09 | 0.49 | -1.75 |
| IPI00011252 | Complement component C8 alpha chain precursor   | R.SLKYNPVVIDFEM*QPIHEVLR.H                  | 3 | 4.81 | 0.40 | -3.62 |
| IPI00011252 | Complement component C8 alpha chain precursor   | R.SLKYNPVVIDFEM*QPIHEVLR.H                  | 4 | 3.24 | 0.20 | -3.60 |
| IPI00011261 | Complement component C8 gamma chain precursor   | K.YGFCEAADQFHVLDEV.R                        | 3 | 4.32 | 0.50 | -2.90 |
| IPI00011261 | Complement component C8 gamma chain precursor   | K.YGFCEAADQFHVLDEVRR.-                      | 3 | 3.15 | 0.43 | -3.73 |
| IPI00011261 | Complement component C8 gamma chain precursor   | K.YGFCEAADQFHVLDEVRR.-                      | 4 | 3.14 | 0.21 | -2.73 |
| IPI00011261 | Complement component C8 gamma chain precursor   | R.AEATTLHVAPQGTAM*AVSTFR.K                  | 2 | 4.26 | 0.50 | -4.11 |
| IPI00011261 | Complement component C8 gamma chain precursor   | R.AEATTLHVAPQGTAM*AVSTFR.K                  | 3 | 3.90 | 0.44 | -1.52 |
| IPI00011261 | Complement component C8 gamma chain precursor   | R.AGQLSVK.L                                 | 1 | 1.75 | 0.10 | -2.57 |
| IPI00011261 | Complement component C8 gamma chain precursor   | R.FLQEQGHR.A                                | 1 | 2.31 | 0.08 | -4.46 |
| IPI00011261 | Complement component C8 gamma chain precursor   | R.FLQEQGHR.A                                | 2 | 2.91 | 0.17 | 0.71  |
| IPI00011261 | Complement component C8 gamma chain precursor   | R.FLQEQGHRAEATTLHVAPQGTAM*AVSTFR.K          | 3 | 5.53 | 0.48 | -4.68 |
| IPI00011261 | Complement component C8 gamma chain precursor   | R.FLQEQGHRAEATTLHVAPQGTAM*AVSTFR.K          | 4 | 4.32 | 0.38 | -3.80 |
| IPI00011261 | Complement component C8 gamma chain precursor   | R.QLYGDTGVLGR.F                             | 2 | 2.54 | 0.35 | -2.44 |
| IPI00011261 | Complement component C8 gamma chain precursor   | R.RPASPISTIQPK.A                            | 1 | 2.97 | 0.28 | -3.67 |
| IPI00011261 | Complement component C8 gamma chain precursor   | R.RPASPISTIQPK.A                            | 2 | 2.76 | 0.21 | -3.91 |
| IPI00011261 | Complement component C8 gamma chain precursor   | R.RPASPISTIQPK.A                            | 3 | 3.11 | 0.08 | -2.59 |
| IPI00011261 | Complement component C8 gamma chain precursor   | R.SLPVSDSVLSGFEQR.V                         | 2 | 4.97 | 0.47 | -3.52 |
| IPI00011261 | Complement component C8 gamma chain precursor   | R.VQEAHLTEDQIFYFPK.Y                        | 2 | 5.16 | 0.47 | -2.86 |
| IPI00011261 | Complement component C8 gamma chain precursor   | R.VQEAHLTEDQIFYFPK.Y                        | 3 | 5.68 | 0.39 | -3.34 |
| IPI00011264 | Complement factor H-related protein 1 precursor | K.CGPPPIDNGDITSFPLSVYAPASSVEYQCQNLQLEGNKR.I | 3 | 5.17 | 0.49 | -3.33 |
| IPI00011264 | Complement factor H-related protein 1 precursor | K.INHGILYDEEK.Y                             | 2 | 3.57 | 0.37 | -3.89 |
| IPI00011264 | Complement factor H-related protein 1 precursor | K.YKPFSQVPTGEVIFYSCYENFVSPSK.S              | 3 | 4.07 | 0.27 |       |
| IPI00011264 | Complement factor H-related protein 1 precursor | R.EIM*ENYNIALR.W                            | 2 | 2.73 | 0.35 | -4.22 |

|             |                                                                      |                                        |   |      |      |       |
|-------------|----------------------------------------------------------------------|----------------------------------------|---|------|------|-------|
| IPI00011264 | Complement factor H-related protein 1 precursor                      | R.LCFFPFVENGHSESSGQTHLEGDTVQIICNTGYR.L | 3 | 5.60 | 0.33 |       |
| IPI00011264 | Complement factor H-related protein 1 precursor                      | R.LQNNENNISCVER.G                      | 2 | 3.88 | 0.44 | -0.87 |
| IPI00011264 | Complement factor H-related protein 1 precursor                      | R.NGQWSEPPKCLHPCVISR.E                 | 3 | 3.60 | 0.35 |       |
| IPI00011264 | Complement factor H-related protein 1 precursor                      | R.QMSKYPSGER.V                         | 2 | 2.87 | 0.22 |       |
| IPI00011264 | Complement factor H-related protein 1 precursor                      | R.STDTSCVNPPTVQNAYIVSR.Q               | 2 | 5.22 | 0.37 |       |
| IPI00011264 | Complement factor H-related protein 1 precursor                      | R.STDTSCVNPPTVQNAYIVSR.Q               | 3 | 3.47 | 0.28 |       |
| IPI00011264 | Complement factor H-related protein 1 precursor                      | R.TGESAEFVCK.R                         | 2 | 2.87 | 0.29 |       |
| IPI00011264 | Complement factor H-related protein 1 precursor                      | R.TGESAEFVCKR.G                        | 2 | 3.12 | 0.23 |       |
| IPI00011264 | Complement factor H-related protein 1 precursor                      | R.TGESAEFVCKR.G                        | 3 | 2.46 | 0.18 |       |
| IPI00011264 | Complement factor H-related protein 1 precursor                      | R.TTCWDGKLEYPTCAK.R                    | 2 | 4.43 | 0.42 |       |
| IPI00011264 | Complement factor H-related protein 1 precursor                      | T.DTSCVNPPTVQNAYIVSR.Q                 | 2 | 4.29 | 0.41 | -4.43 |
| IPI00011264 | Complement factor H-related protein 1 precursor                      | T.DTSCVNPPTVQNAYIVSR.Q                 | 3 | 3.75 | 0.42 | -4.38 |
| IPI00011302 | CD59 glycoprotein precursor                                          | K.AGLQVYNK.C                           | 1 | 2.00 | 0.06 | -4.06 |
| IPI00011302 | CD59 glycoprotein precursor                                          | K.AGLQVYNK.C                           | 2 | 3.39 | 0.23 | -2.31 |
| IPI00011302 | CD59 glycoprotein precursor                                          | K.FEHCNFDVTR.L                         | 2 | 2.57 | 0.21 | -3.59 |
| IPI00011302 | CD59 glycoprotein precursor                                          | R.LRENELTYCCK.K                        | 2 | 4.16 | 0.54 | -3.06 |
| IPI00011302 | CD59 glycoprotein precursor                                          | R.LRENELTYCCK.K                        | 3 | 2.68 | 0.18 | -1.62 |
| IPI00011302 | CD59 glycoprotein precursor                                          | S.LQCYNCPNPTADCK.T                     | 2 | 4.67 | 0.57 | -2.66 |
| IPI00011400 | T-lymphoma invasion and metastasis-inducing protein 1                | K.NFLVHKKNKVESATRR.K                   | 2 | 3.31 | 0.09 |       |
| IPI00011416 | Delta(3,5)-Delta(2,4)-dienoyl-CoA isomerase, mitochondrial precursor | K.GDDVARISWYLRIITRYQETFNVIER.C         | 3 | 3.58 | 0.22 |       |
| IPI00011454 | Isoform 2 of Neutral alpha-glucosidase AB precursor                  | K.M*M*DYLQGSGETPQTDVW.R                | 2 | 3.86 | 0.34 |       |
| IPI00011454 | Isoform 2 of Neutral alpha-glucosidase AB precursor                  | R.GLLEFEHQ.R.A                         | 2 | 2.20 | 0.20 | -2.35 |
| IPI00011454 | Isoform 2 of Neutral alpha-glucosidase AB precursor                  | R.KLVAIVDPHIK.V                        | 3 | 3.56 | 0.16 |       |
| IPI00011454 | Isoform 2 of Neutral alpha-glucosidase AB precursor                  | R.LDLLEDR.S                            | 2 | 2.73 | 0.13 | -2.49 |
| IPI00011454 | Isoform 2 of Neutral alpha-glucosidase AB precursor                  | R.LKVTEGGEPYR.L                        | 2 | 2.41 | 0.13 | -2.00 |
| IPI00011454 | Isoform 2 of Neutral alpha-glucosidase AB precursor                  | R.LSFQHPETSVLVLR.K                     | 2 | 2.40 | 0.14 | -3.78 |
| IPI00011454 | Isoform 2 of Neutral alpha-glucosidase AB precursor                  | R.LSFQHPETSVLVLR.K                     | 3 | 3.57 | 0.28 | -1.51 |
| IPI00011454 | Isoform 2 of Neutral alpha-glucosidase AB precursor                  | R.QYASLTGTQALPPLFSLGYHQS.R.W           | 3 | 3.57 | 0.28 | -1.57 |
| IPI00011454 | Isoform 2 of Neutral alpha-glucosidase AB precursor                  | R.SIRPGLSPYR.A                         | 2 | 2.17 | 0.05 | -2.97 |
| IPI00011454 | Isoform 2 of Neutral alpha-glucosidase AB precursor                  | R.YRVPDVLVADPPIAR.L                    | 3 | 3.79 | 0.31 | -2.23 |



|             |                                                                         |                                 |   |      |      |       |
|-------------|-------------------------------------------------------------------------|---------------------------------|---|------|------|-------|
| IPI00011515 | Protein kinase C and casein kinase substrate in neurons protein 1       | R.GRLDSGQLGLYPANYVEAI.-         | 2 | 3.49 | 0.42 | -4.41 |
| IPI00011518 | Isoform A of Beta-secretase 1 precursor                                 | K.KVFEEAAVK.S                   | 1 | 1.72 | 0.16 | -3.63 |
| IPI00011518 | Isoform A of Beta-secretase 1 precursor                                 | R.ITILPQQYLRPVEDVATSQDDCYK.F    | 3 | 3.81 | 0.29 | -3.72 |
| IPI00011518 | Isoform A of Beta-secretase 1 precursor                                 | R.KGVVYPYTQGK.W                 | 2 | 2.93 | 0.36 | -2.83 |
| IPI00011518 | Isoform A of Beta-secretase 1 precursor                                 | R.VEINGQDLK.M                   | 2 | 2.53 | 0.07 | -2.51 |
| IPI00011564 | Syndecan-4 precursor                                                    | A.ESIRETEVIDPQDLLEGR.Y          | 3 | 4.44 | 0.12 | 0.78  |
| IPI00011578 | Isoform 1 of Neuroplastin precursor                                     | K.NGVELSATR.K                   | 2 | 3.02 | 0.34 | -1.46 |
| IPI00011592 | Cytoplasmic dynein 1 light intermediate chain 2                         | K.TGSPGSPGAGGVQSTAK.K           | 2 | 2.54 | 0.38 | -2.88 |
| IPI00011605 | Cerebellin-1 precursor                                                  | K.CLVVCDSNPTSDPTGTALGISVR.S     | 2 | 6.64 | 0.58 | -4.59 |
| IPI00011605 | Cerebellin-1 precursor                                                  | K.CLVVCDSNPTSDPTGTALGISVR.S     | 3 | 2.43 | 0.19 | -3.57 |
| IPI00011605 | Cerebellin-1 precursor                                                  | R.AYLKLER.G                     | 2 | 2.38 | 0.10 | -3.25 |
| IPI00011605 | Cerebellin-1 precursor                                                  | R.EAASNGVLIQM*EK.G              | 2 | 3.99 | 0.40 | -4.64 |
| IPI00011605 | Cerebellin-1 precursor                                                  | R.EAASNGVLIQM*EKGDR.A           | 2 | 3.96 | 0.41 | -2.57 |
| IPI00011605 | Cerebellin-1 precursor                                                  | R.EAASNGVLIQM*EKGDR.A           | 3 | 2.32 | 0.27 | -1.71 |
| IPI00011605 | Cerebellin-1 precursor                                                  | R.STFIAPR.K                     | 1 | 1.69 | 0.18 | -1.09 |
| IPI00011605 | Cerebellin-1 precursor                                                  | R.TM*IIYFDQVLVNIGNNFDSE.S       | 2 | 4.76 | 0.54 | -3.97 |
| IPI00011605 | Cerebellin-1 precursor                                                  | R.TM*IIYFDQVLVNIGNNFDSE.S       | 3 | 6.15 | 0.49 | -2.50 |
| IPI00011643 | Isoform 2 of Kunitz-type protease inhibitor 1 precursor                 | K.AWAGIDLK.V                    | 1 | 2.07 | 0.05 | -3.15 |
| IPI00011651 | Isoform 1 of Receptor-type tyrosine-protein phosphatase gamma precursor | K.ASGDPYWAYSAYGPEHWVTSSVSCGGR.H | 3 | 5.01 | 0.63 | -2.31 |
| IPI00011651 | Isoform 1 of Receptor-type tyrosine-protein phosphatase gamma precursor | K.ATISHVSPDSLFLFR.V             | 2 | 4.30 | 0.44 | -3.26 |
| IPI00011651 | Isoform 1 of Receptor-type tyrosine-protein phosphatase gamma precursor | K.ATISHVSPDSLFLFR.V             | 3 | 5.14 | 0.36 | -3.22 |
| IPI00011651 | Isoform 1 of Receptor-type tyrosine-protein phosphatase gamma precursor | K.DDYFVSGAGLPGR.F               | 2 | 4.23 | 0.36 | -4.64 |
| IPI00011651 | Isoform 1 of Receptor-type tyrosine-protein phosphatase gamma precursor | K.ETFLDPFVLR.D                  | 2 | 3.18 | 0.32 | -4.52 |
| IPI00011651 | Isoform 1 of Receptor-type tyrosine-protein phosphatase gamma precursor | K.ETFLDPFVLRDLLPASLGSYYR.Y      | 3 | 3.23 | 0.25 | -3.68 |
| IPI00011651 | Isoform 1 of Receptor-type tyrosine-protein phosphatase gamma precursor | K.GVVHHEKETFLDPFVLR.D           | 2 | 4.14 | 0.48 | -5.33 |
| IPI00011651 | Isoform 1 of Receptor-type tyrosine-protein phosphatase gamma precursor | K.GVVHHEKETFLDPFVLR.D           | 3 | 4.55 | 0.28 | -4.17 |
| IPI00011651 | Isoform 1 of Receptor-type tyrosine-protein phosphatase gamma precursor | K.TFTKDSKDLK.A                  | 2 | 3.32 | 0.22 | -3.96 |
| IPI00011651 | Isoform 1 of Receptor-type tyrosine-protein phosphatase gamma precursor | K.TVAILLKDDYFVSGAGLPGR.F        | 3 | 4.41 | 0.36 | -4.49 |
| IPI00011651 | Isoform 1 of Receptor-type tyrosine-protein phosphatase gamma precursor | R.DLLPASLGSYYR.Y                | 2 | 3.78 | 0.48 | -3.31 |

|             |                                                                         |                                             |   |      |      |       |
|-------------|-------------------------------------------------------------------------|---------------------------------------------|---|------|------|-------|
| IPI00011651 | Isoform 1 of Receptor-type tyrosine-protein phosphatase gamma precursor | R.DNSALDPIIHGLK.G                           | 2 | 3.96 | 0.37 | -3.63 |
| IPI00011651 | Isoform 1 of Receptor-type tyrosine-protein phosphatase gamma precursor | R.DNSALDPIIHGLK.G                           | 3 | 2.58 | 0.23 | -1.68 |
| IPI00011651 | Isoform 1 of Receptor-type tyrosine-protein phosphatase gamma precursor | R.HQSPIDILDQYAR.V                           | 2 | 3.40 | 0.32 | -4.73 |
| IPI00011651 | Isoform 1 of Receptor-type tyrosine-protein phosphatase gamma precursor | R.IIGAM*AIFFQVSPR.D                         | 2 | 4.19 | 0.48 | -4.82 |
| IPI00011651 | Isoform 1 of Receptor-type tyrosine-protein phosphatase gamma precursor | R.IIGAM*AIFFQVSPR.D                         | 3 | 3.13 | 0.20 | -1.73 |
| IPI00011651 | Isoform 1 of Receptor-type tyrosine-protein phosphatase gamma precursor | R.RFPVEM*QIFFYNPDDFDSFQTAISENR.I            | 3 | 5.78 | 0.47 | -2.09 |
| IPI00011651 | Isoform 1 of Receptor-type tyrosine-protein phosphatase gamma precursor | R.RFPVEMQIFFYNPDDFDSFQTAISENR.I             | 3 | 5.40 | 0.44 | -7.24 |
| IPI00011651 | Isoform 1 of Receptor-type tyrosine-protein phosphatase gamma precursor | R.RPVPISYHQLEAFYSIFTTEQQDHVK.S              | 5 | 3.38 | 0.32 | -3.49 |
| IPI00011651 | Isoform 1 of Receptor-type tyrosine-protein phosphatase gamma precursor | R.YTGSLTTPPCSEIVEWIVFR.R                    | 2 | 3.53 | 0.50 | -4.68 |
| IPI00011651 | Isoform 1 of Receptor-type tyrosine-protein phosphatase gamma precursor | R.YTGSLTTPPCSEIVEWIVFR.R                    | 3 | 4.64 | 0.44 | -5.19 |
| IPI00011654 | Tubulin beta chain                                                      | K.GHYTEGAELVDSVLDVVR.K                      | 2 | 2.94 | 0.28 |       |
| IPI00011654 | Tubulin beta chain                                                      | K.GHYTEGAELVDSVLDVVR.K                      | 3 | 3.28 | 0.30 | -3.01 |
| IPI00011654 | Tubulin beta chain                                                      | K.GHYTEGAELVDSVLDVVRK.E                     | 3 | 3.51 | 0.45 | -3.20 |
| IPI00011654 | Tubulin beta chain                                                      | K.MAVTFIGNSTAIQELFK.R                       | 2 | 5.38 | 0.44 | -2.16 |
| IPI00011654 | Tubulin beta chain                                                      | K.NM*M*AACDPR.H                             | 2 | 1.73 | 0.12 | 0.11  |
| IPI00011654 | Tubulin beta chain                                                      | K.VSDTVVEPYNATLSVHQLVENTDETYCIDNEALYDICFR.T | 3 | 4.91 | 0.43 | -2.95 |
| IPI00011654 | Tubulin beta chain                                                      | K.VSDTVVEPYNATLSVHQLVENTDETYCIDNEALYDICFR.T | 4 | 4.05 | 0.34 | -2.05 |
| IPI00011654 | Tubulin beta chain                                                      | R.ISEQFTAM*FR.R                             | 2 | 2.17 | 0.13 | -2.65 |
| IPI00011654 | Tubulin beta chain                                                      | R.ISEQFTAMFR.R                              | 2 | 2.87 | 0.27 | -0.81 |
| IPI00011654 | Tubulin beta chain                                                      | R.LHFFM*PGFAPLTSR.G                         | 3 | 3.20 | 0.06 | -3.00 |
| IPI00011654 | Tubulin beta chain                                                      | R.LHFFMPGFAPLTSR.G                          | 3 | 2.62 | 0.11 | -1.73 |
| IPI00011662 | Kunitz-type protease inhibitor 2 precursor                              | K.CATVTENATGDLATSR.N                        | 2 | 4.93 | 0.42 | -3.34 |
| IPI00011662 | Kunitz-type protease inhibitor 2 precursor                              | R.NAADSSVPSAPR.R                            | 1 | 2.05 | 0.12 | -4.38 |
| IPI00011662 | Kunitz-type protease inhibitor 2 precursor                              | R.NAADSSVPSAPR.R                            | 2 | 3.95 | 0.43 | -3.61 |
| IPI00011662 | Kunitz-type protease inhibitor 2 precursor                              | R.WYFDVER.N                                 | 2 | 1.65 | 0.05 | -1.64 |
| IPI00011730 | EMILIN-3 precursor                                                      | R.GPLTPPLDEILSK.V                           | 2 | 1.90 | 0.19 | 1.54  |
| IPI00011730 | EMILIN-3 precursor                                                      | R.LATLAGELSHDSASPGR.S                       | 2 | 2.39 | 0.23 | -1.03 |
| IPI00011730 | EMILIN-3 precursor                                                      | R.LGLLAAGLDSLPTPLRPR.E                      | 3 | 2.35 | 0.07 | -1.16 |
| IPI00011730 | EMILIN-3 precursor                                                      | R.RLGLLAAGLDSLPTPLRPR.E                     | 3 | 3.99 | 0.37 | -2.13 |
| IPI00011730 | EMILIN-3 precursor                                                      | R.RLGLLAAGLDSLPTPLRPR.E                     | 4 | 2.75 | 0.24 | -0.75 |
| IPI00011730 | EMILIN-3 precursor                                                      | R.TLAQHTQDIAR.L                             | 2 | 2.65 | 0.14 | -2.96 |

|             |                                                                            |                                    |   |      |      |       |
|-------------|----------------------------------------------------------------------------|------------------------------------|---|------|------|-------|
| IPI00011732 | Isoform 1 of GDNF family receptor alpha-2 precursor                        | R.DFTENPLR.N                       | 2 | 2.68 | 0.21 | -2.74 |
| IPI00011732 | Isoform 1 of GDNF family receptor alpha-2 precursor                        | R.LASIFSGTGADPVVSAK.S              | 2 | 5.04 | 0.55 | -2.89 |
| IPI00011732 | Isoform 1 of GDNF family receptor alpha-2 precursor                        | R.LASIFSGTGADPVVSAK.S              | 3 | 2.37 | 0.28 | -2.69 |
| IPI00011732 | Isoform 1 of GDNF family receptor alpha-2 precursor                        | R.QFFDRVPSEYTYR.M                  | 2 | 1.37 | 0.07 | -3.50 |
| IPI00011732 | Isoform 1 of GDNF family receptor alpha-2 precursor                        | R.SSYISICNR.E                      | 2 | 2.99 | 0.20 | -0.60 |
| IPI00011732 | Isoform 1 of GDNF family receptor alpha-2 precursor                        | R.VPSEYTYR.M                       | 2 | 2.33 | 0.17 | -1.99 |
| IPI00011732 | Isoform 1 of GDNF family receptor alpha-2 precursor                        | S.IFSGTGADPVVSAK.S                 | 2 | 3.77 | 0.40 | -3.63 |
| IPI00011781 | Ankyrin repeat-containing protein C20orf86 precursor                       | R.TANSEHFEGEKWKHWTSQRAFVALYVASHR.G | 3 | 2.98 | 0.17 | -0.86 |
| IPI00011865 | Isoform 2 of Platelet-derived growth factor D precursor                    | K.IAEFDTVEDLLK.Y                   | 2 | 1.67 | 0.16 | -1.88 |
| IPI00011865 | Isoform 2 of Platelet-derived growth factor D precursor                    | K.LANVVFPR.C                       | 2 | 3.73 | 0.27 | -0.72 |
| IPI00011899 | BMP and activin membrane-bound inhibitor homolog precursor                 | K.SELSACFSR.L                      | 2 | 2.92 | 0.28 | -0.58 |
| IPI00011899 | BMP and activin membrane-bound inhibitor homolog precursor                 | R.GLHDVLSPPRGEASQGGR.Y             | 3 | 2.48 | 0.39 | -2.71 |
| IPI00011899 | BMP and activin membrane-bound inhibitor homolog precursor                 | R.LLDPQNSNSPLTHGCLDSLASTTDICQAK.Q  | 3 | 5.27 | 0.47 | -3.51 |
| IPI00011994 | Ectonucleotide pyrophosphatase/phosphodiesterase family member 5 precursor | K.FWEEATPIWITNQR.A                 | 2 | 4.87 | 0.51 | -5.32 |
| IPI00011994 | Ectonucleotide pyrophosphatase/phosphodiesterase family member 5 precursor | K.FWEEATPIWITNQR.A                 | 3 | 3.70 | 0.24 | -2.84 |
| IPI00011994 | Ectonucleotide pyrophosphatase/phosphodiesterase family member 5 precursor | K.LGYLIQM*LK.K                     | 2 | 3.10 | 0.19 | -2.03 |
| IPI00011994 | Ectonucleotide pyrophosphatase/phosphodiesterase family member 5 precursor | K.LGYLIQM*LKK.A                    | 3 | 1.72 | 0.13 | -3.36 |
| IPI00011994 | Ectonucleotide pyrophosphatase/phosphodiesterase family member 5 precursor | K.SFSLDHM*NIYDSK.F                 | 2 | 3.40 | 0.30 | -3.05 |

|             |                                                                                              |                                  |   |      |      |       |
|-------------|----------------------------------------------------------------------------------------------|----------------------------------|---|------|------|-------|
| IPI00011994 | Ectonucleotide pyrophosphatase/phosphodiesterase family member 5 precursor                   | K.VLLVSFDGFR.W                   | 2 | 3.59 | 0.40 | -3.99 |
| IPI00011994 | Ectonucleotide pyrophosphatase/phosphodiesterase family member 5 precursor                   | R.LIELDQYLDKDHLYTLIDQSPVAAILPK.E | 3 | 6.09 | 0.50 | -3.15 |
| IPI00011994 | Ectonucleotide pyrophosphatase/phosphodiesterase family member 5 precursor                   | R.LIELDQYLDKDHLYTLIDQSPVAAILPK.E | 4 | 3.46 | 0.40 | -4.09 |
| IPI00012007 | Adenosylhomocysteinase                                                                       | K.KLDEAVAEHLGK.L                 | 3 | 2.52 | 0.11 | -2.33 |
| IPI00012007 | Adenosylhomocysteinase                                                                       | R.ATDVM*IAGK.V                   | 2 | 2.47 | 0.23 | 0.10  |
| IPI00012009 | Isoform 1 of Granulocyte-macrophage colony-stimulating factor receptor alpha chain precursor | K.LSYLDFQYQLDVHRK.N              | 4 | 3.19 | 0.23 | -3.26 |
| IPI00012009 | Isoform 1 of Granulocyte-macrophage colony-stimulating factor receptor alpha chain precursor | R.EIGIQFFDSLDDTK.K               | 2 | 4.78 | 0.54 | -4.24 |
| IPI00012011 | Cofilin-1                                                                                    | K.LGGSAVISLEGKPL.-               | 2 | 3.17 | 0.31 | -3.48 |
| IPI00012011 | Cofilin-1                                                                                    | K.NIILEEGKEILVGDVGGTVDPPYATFVK.M | 3 | 5.14 | 0.29 | -5.93 |
| IPI00012011 | Cofilin-1                                                                                    | R.YALYDATYETK.E                  | 2 | 3.27 | 0.30 | -1.92 |
| IPI00012044 | Isoform 1 of Pro-neuregulin-3, membrane-bound isoform precursor                              | R.DKDLAYCLNDGECFVIETLTGSHK.H     | 4 | 3.01 | 0.18 | -4.23 |
| IPI00012048 | Nucleoside diphosphate kinase A                                                              | R.GDFCIQVGR.N                    | 2 | 2.05 | 0.12 | -3.65 |
| IPI00012048 | Nucleoside diphosphate kinase A                                                              | R.GLVGEIIK.R                     | 2 | 2.03 | 0.15 | -2.61 |
| IPI00012048 | Nucleoside diphosphate kinase A                                                              | R.VM*LGETNPADSKPGTIR.G           | 2 | 4.01 | 0.37 | -2.88 |
| IPI00012048 | Nucleoside diphosphate kinase A                                                              | R.VM*LGETNPADSKPGTIR.G           | 3 | 3.19 | 0.22 | -3.78 |
| IPI00012058 | Brain-derived neurotrophic factor precursor                                                  | K.VRPNEENNKDADLYTSR.V            | 3 | 3.79 | 0.22 | -2.61 |
| IPI00012058 | Brain-derived neurotrophic factor precursor                                                  | R.GQGGLAYPGVR.T                  | 2 | 2.82 | 0.29 | 0.23  |
| IPI00012058 | Brain-derived neurotrophic factor precursor                                                  | R.THGTLESVNGPK.A                 | 2 | 3.45 | 0.42 | -3.54 |
| IPI00012058 | Brain-derived neurotrophic factor precursor                                                  | T.SLADTFEHVIEELLEDDQK.V          | 3 | 4.09 | 0.25 | -2.88 |
| IPI00012075 | C-type natriuretic peptide precursor                                                         | K.APGGGGANLKGDR.S                | 2 | 3.38 | 0.36 | -2.46 |
| IPI00012075 | C-type natriuretic peptide precursor                                                         | K.KGDKAPGGGGANLKGDR.S            | 2 | 3.53 | 0.41 | -3.79 |
| IPI00012075 | C-type natriuretic peptide precursor                                                         | K.KGDKAPGGGGANLKGDR.S            | 3 | 3.77 | 0.35 | -2.64 |
| IPI00012075 | C-type natriuretic peptide precursor                                                         | K.KGDKAPGGGGANLKGDRS.R           | 2 | 4.12 | 0.49 | -4.77 |
| IPI00012075 | C-type natriuretic peptide precursor                                                         | P.AEELAEPQAAGGGQK.K              | 2 | 4.35 | 0.45 | -3.55 |
| IPI00012075 | C-type natriuretic peptide precursor                                                         | R.TPPAEELAEPQAAGGGQK.K           | 2 | 5.95 | 0.63 | -4.19 |
| IPI00012075 | C-type natriuretic peptide precursor                                                         | R.TPPAEELAEPQAAGGGQK.K           | 3 | 3.43 | 0.23 | -3.03 |
| IPI00012102 | N-acetylglucosamine-6-sulfatase precursor                                                    | K.AFQNVFAPR.N                    | 2 | 2.79 | 0.24 | -2.98 |
| IPI00012102 | N-acetylglucosamine-6-sulfatase precursor                                                    | K.IQEPNTFPAILR.S                 | 2 | 3.26 | 0.29 | -4.10 |
| IPI00012102 | N-acetylglucosamine-6-sulfatase precursor                                                    | K.YLNEYGAPDAGGLEHVPLGWSYWYALEK.N | 3 | 4.56 | 0.26 | -3.66 |
| IPI00012102 | N-acetylglucosamine-6-sulfatase precursor                                                    | R.ASILTGK.Y                      | 1 | 1.64 | 0.10 | -2.08 |
| IPI00012102 | N-acetylglucosamine-6-sulfatase precursor                                                    | R.LM*M*LQSCSGPTCR.T              | 2 | 4.15 | 0.46 | -3.14 |
| IPI00012102 | N-acetylglucosamine-6-sulfatase precursor                                                    | R.QLYEFDIK.V                     | 2 | 1.99 | 0.06 | -2.37 |
| IPI00012102 | N-acetylglucosamine-6-sulfatase precursor                                                    | R.QLYEFDIKVPLLVR.G               | 2 | 3.05 | 0.40 | -2.41 |

|             |                                                    |                                          |   |      |      |       |
|-------------|----------------------------------------------------|------------------------------------------|---|------|------|-------|
| IPI00012102 | N-acetylglucosamine-6-sulfatase precursor          | R.QLYEFDIKVPLLVR.G                       | 3 | 2.34 | 0.11 | -1.51 |
| IPI00012102 | N-acetylglucosamine-6-sulfatase precursor          | R.RPNVLLLLTDDQDEVLLGGM*TPLKK.T           | 3 | 5.07 | 0.52 | -4.89 |
| IPI00012102 | N-acetylglucosamine-6-sulfatase precursor          | R.SM*CGYQTFAGK.Y                         | 2 | 4.06 | 0.52 | -3.92 |
| IPI00012102 | N-acetylglucosamine-6-sulfatase precursor          | R.TPGVFDPGYR.F                           | 2 | 2.51 | 0.22 | -1.09 |
| IPI00012102 | N-acetylglucosamine-6-sulfatase precursor          | R.WQTLLSVDDLVEK.L                        | 2 | 4.10 | 0.42 | -3.62 |
| IPI00012269 | Multimerin-1 precursor                             | K.FLQSFAR.K                              | 2 | 2.21 | 0.11 | -2.33 |
| IPI00012269 | Multimerin-1 precursor                             | K.LKEVHEQLLSTEQVSDQK.N                   | 3 | 3.90 | 0.33 | -3.78 |
| IPI00012269 | Multimerin-1 precursor                             | R.KSNEQATSLNTVGGTGGIGGVTGGVGNR.A         | 3 | 6.60 | 0.48 | -2.67 |
| IPI00012283 | Isoform 1 of Semaphorin-3B precursor               | K.TFGTFSSTKDFPDDVIQFAR.N                 | 3 | 4.14 | 0.45 | -2.88 |
| IPI00012283 | Isoform 1 of Semaphorin-3B precursor               | K.VFWIPESNPDDDKIYFFFR.E                  | 3 | 2.85 | 0.20 | -1.98 |
| IPI00012283 | Isoform 1 of Semaphorin-3B precursor               | R.AFLGPFPAHK.E                           | 2 | 1.64 | 0.06 | -1.83 |
| IPI00012283 | Isoform 1 of Semaphorin-3B precursor               | R.ETAVEAAPALGR.L                         | 2 | 3.41 | 0.37 | -2.81 |
| IPI00012283 | Isoform 1 of Semaphorin-3B precursor               | R.LFVGAENHVASLNLNISK.R                   | 3 | 3.67 | 0.27 | -1.55 |
| IPI00012283 | Isoform 1 of Semaphorin-3B precursor               | R.LVCSVPGVEGDTHFDQLQDVLLSSR.D            | 3 | 3.94 | 0.34 | -3.13 |
| IPI00012283 | Isoform 1 of Semaphorin-3B precursor               | R.SAVAQIALHR.C                           | 2 | 2.29 | 0.13 | -2.36 |
| IPI00012303 | Selenium-binding protein 1                         | K.GGLKLNPNFLVDFGKEPLGALAEHLR.Y           | 4 | 4.11 | 0.45 | -2.28 |
| IPI00012303 | Selenium-binding protein 1                         | K.GGPVQVLEDEELKSQPEPLVK.G                | 3 | 2.92 | 0.19 | -2.75 |
| IPI00012303 | Selenium-binding protein 1                         | K.LNPNFLVDFGKEPLGALAEHLR.Y               | 3 | 4.08 | 0.47 | -4.12 |
| IPI00012303 | Selenium-binding protein 1                         | K.QFYPLIR.E                              | 2 | 1.74 | 0.12 | -1.05 |
| IPI00012303 | Selenium-binding protein 1                         | K.RVAGGPQM*IQSLDGK.R                     | 3 | 3.95 | 0.28 | -2.55 |
| IPI00012303 | Selenium-binding protein 1                         | R.DGFNPADVEAGLYGSHLYVWDWQR.H             | 3 | 3.63 | 0.45 | -3.88 |
| IPI00012303 | Selenium-binding protein 1                         | R.FLHNPDAAQGFVGCALSSTIQR.F               | 3 | 2.80 | 0.05 | -3.46 |
| IPI00012303 | Selenium-binding protein 1                         | R.HEIVQTLSLK.D                           | 2 | 2.29 | 0.12 | -1.26 |
| IPI00012303 | Selenium-binding protein 1                         | R.HEIVQTLSLKDGLIPLIR.F                   | 3 | 4.84 | 0.50 | -4.81 |
| IPI00012303 | Selenium-binding protein 1                         | R.IYVVDVGSEPR.A                          | 2 | 3.90 | 0.38 | -2.51 |
| IPI00012303 | Selenium-binding protein 1                         | R.LTGQLFLGGSIVK.G                        | 2 | 3.61 | 0.36 | -2.43 |
| IPI00012303 | Selenium-binding protein 1                         | R.NTGTEAPDYLATVDVDPK.S                   | 2 | 4.98 | 0.50 | -4.38 |
| IPI00012303 | Selenium-binding protein 1                         | R.QYDISDPQRPR.L                          | 2 | 1.20 | 0.15 | -1.92 |
| IPI00012303 | Selenium-binding protein 1                         | R.TKLVLPSLISSR.I                         | 2 | 2.75 | 0.24 | -1.82 |
| IPI00012315 | Nucleoside diphosphate kinase 3                    | K.LVQASEELLREHYAELR.E                    | 4 | 1.84 | 0.18 | -2.14 |
| IPI00012315 | Nucleoside diphosphate kinase 3                    | R.ALIGATNPADAPPGTIR.G                    | 2 | 3.42 | 0.25 | -3.78 |
| IPI00012386 | Cochlin precursor                                  | G.AAPIAITCFTR.G                          | 2 | 3.33 | 0.36 | -2.56 |
| IPI00012386 | Cochlin precursor                                  | K.ADVLCPPGGCPLLEEFVYGNIVYASVSSICGAAVHR.G | 3 | 4.13 | 0.42 | -3.31 |
| IPI00012386 | Cochlin precursor                                  | R.GVISNSGGPVR.V                          | 1 | 1.90 | 0.23 | -2.29 |
| IPI00012386 | Cochlin precursor                                  | R.GVISNSGGPVR.V                          | 2 | 3.42 | 0.21 | -1.20 |
| IPI00012386 | Cochlin precursor                                  | S.EGAAPIAITCFTR.G                        | 1 | 3.37 | 0.40 | -3.71 |
| IPI00012386 | Cochlin precursor                                  | S.EGAAPIAITCFTR.G                        | 2 | 4.22 | 0.47 | -3.07 |
| IPI00012391 | Isoform Long of Adenomatous polyposis coli protein | K.RSSNDSLNSVSSSDGYGKR.G                  | 2 | 1.89 | 0.10 | -0.02 |
| IPI00012440 | Plasma alpha-L-fucosidase precursor                | K.AILGATEVK.L                            | 1 | 1.74 | 0.19 | -2.75 |
| IPI00012440 | Plasma alpha-L-fucosidase precursor                | K.AILGATEVK.L                            | 2 | 2.46 | 0.15 | -1.80 |
| IPI00012440 | Plasma alpha-L-fucosidase precursor                | K.DNYPPSFKYEDFGPLFTAK.F                  | 2 | 2.97 | 0.37 | -3.32 |

|             |                                                        |                                               |   |      |      |       |
|-------------|--------------------------------------------------------|-----------------------------------------------|---|------|------|-------|
| IPI00012440 | Plasma alpha-L-fucosidase precursor                    | K.DNYPPSFKYEDFGPLFTAK.F                       | 3 | 2.43 | 0.12 | -3.03 |
| IPI00012440 | Plasma alpha-L-fucosidase precursor                    | K.FFNANQWADIFQASGAK.Y                         | 2 | 5.51 | 0.54 | -3.46 |
| IPI00012440 | Plasma alpha-L-fucosidase precursor                    | K.FFNANQWADIFQASGAK.Y                         | 3 | 4.69 | 0.35 | -3.36 |
| IPI00012440 | Plasma alpha-L-fucosidase precursor                    | K.LVYAIFLK.W                                  | 1 | 1.72 | 0.07 | -2.15 |
| IPI00012440 | Plasma alpha-L-fucosidase precursor                    | K.LVYAIFLK.W                                  | 2 | 2.77 | 0.27 | -1.87 |
| IPI00012440 | Plasma alpha-L-fucosidase precursor                    | K.RDIVKELEVAIR.N                              | 3 | 3.90 | 0.20 | -2.63 |
| IPI00012440 | Plasma alpha-L-fucosidase precursor                    | K.VNGEAIYETYTW.R.S                            | 2 | 4.37 | 0.48 | -2.97 |
| IPI00012440 | Plasma alpha-L-fucosidase precursor                    | K.YEDFGPLFTAK.F                               | 2 | 3.92 | 0.45 | -3.18 |
| IPI00012440 | Plasma alpha-L-fucosidase precursor                    | K.YIVLTSK.H                                   | 1 | 2.18 | 0.21 | -2.26 |
| IPI00012440 | Plasma alpha-L-fucosidase precursor                    | K.YIVLTSK.H                                   | 2 | 2.19 | 0.13 | -3.49 |
| IPI00012440 | Plasma alpha-L-fucosidase precursor                    | R.DIVKELEVAIR.N                               | 2 | 3.51 | 0.34 | -1.98 |
| IPI00012440 | Plasma alpha-L-fucosidase precursor                    | R.EAGISDYLTIEELVK.Q                           | 2 | 4.29 | 0.47 | -3.79 |
| IPI00012440 | Plasma alpha-L-fucosidase precursor                    | R.FDPTWESLDAR.Q                               | 2 | 3.19 | 0.32 | -1.51 |
| IPI00012440 | Plasma alpha-L-fucosidase precursor                    | R.QLPAWFDQAK.F                                | 2 | 2.17 | 0.17 | -2.20 |
| IPI00012441 | Isoform 1 of Synaptojanin-1                            | K.EGEHMLS KAFQSHLKASEHAADIQMVNFYHQMVKGGKAEK.L | 4 | 3.00 | 0.11 | -5.61 |
| IPI00012503 | Isoform Sap-mu-0 of Proactivator polypeptide precursor | D.NGDVCQDCIQM*VTDIQTAVR.T                     | 2 | 5.50 | 0.45 | -3.98 |
| IPI00012503 | Isoform Sap-mu-0 of Proactivator polypeptide precursor | D.NGDVCQDCIQM*VTDIQTAVR.T                     | 3 | 4.10 | 0.37 | -3.48 |
| IPI00012503 | Isoform Sap-mu-0 of Proactivator polypeptide precursor | D.VYCEVCEFLVK.E                               | 1 | 3.24 | 0.27 | -2.50 |
| IPI00012503 | Isoform Sap-mu-0 of Proactivator polypeptide precursor | D.VYCEVCEFLVK.E                               | 2 | 4.44 | 0.46 | -5.17 |
| IPI00012503 | Isoform Sap-mu-0 of Proactivator polypeptide precursor | E.IVDSYLPVILDIK.G                             | 2 | 4.12 | 0.40 | -4.24 |
| IPI00012503 | Isoform Sap-mu-0 of Proactivator polypeptide precursor | K.DGGFCEVCK.K                                 | 2 | 2.45 | 0.35 | -0.85 |
| IPI00012503 | Isoform Sap-mu-0 of Proactivator polypeptide precursor | K.DNGDVCQDCIQM*VTDIQTAVR.T                    | 2 | 4.67 | 0.41 |       |
| IPI00012503 | Isoform Sap-mu-0 of Proactivator polypeptide precursor | K.DNGDVCQDCIQM*VTDIQTAVR.T                    | 3 | 5.65 | 0.35 |       |
| IPI00012503 | Isoform Sap-mu-0 of Proactivator polypeptide precursor | K.DVVTAAGDM*LK.D                              | 2 | 2.65 | 0.21 | -1.81 |
| IPI00012503 | Isoform Sap-mu-0 of Proactivator polypeptide precursor | K.EICALVGFCDEVK.E                             | 2 | 3.49 | 0.42 | -2.51 |
| IPI00012503 | Isoform Sap-mu-0 of Proactivator polypeptide precursor | K.EICALVGFCDEVKEM*PM*QTLVPAK.V                | 3 | 2.64 | 0.26 | 2.54  |
| IPI00012503 | Isoform Sap-mu-0 of Proactivator polypeptide precursor | K.EILDAFDK.M                                  | 1 | 2.32 | 0.25 | -2.23 |
| IPI00012503 | Isoform Sap-mu-0 of Proactivator polypeptide precursor | K.EILDAFDK.M                                  | 2 | 2.37 | 0.07 | -1.75 |

|             |                                                        |                                          |   |      |      |       |
|-------------|--------------------------------------------------------|------------------------------------------|---|------|------|-------|
| IPI00012503 | Isoform Sap-mu-0 of Proactivator polypeptide precursor | K.EIVDSYLPVILDIK.G                       | 1 | 3.03 | 0.41 | -3.92 |
| IPI00012503 | Isoform Sap-mu-0 of Proactivator polypeptide precursor | K.EIVDSYLPVILDIK.G                       | 2 | 5.50 | 0.49 | -5.55 |
| IPI00012503 | Isoform Sap-mu-0 of Proactivator polypeptide precursor | K.EIVDSYLPVILDIK.G                       | 3 | 5.22 | 0.45 | -4.52 |
| IPI00012503 | Isoform Sap-mu-0 of Proactivator polypeptide precursor | K.EIVDSYLPVILDIK GEM*SRPGEVCSALNLC.E     | 3 | 5.00 | 0.51 | -4.08 |
| IPI00012503 | Isoform Sap-mu-0 of Proactivator polypeptide precursor | K.EIVDSYLPVILDIK GEM*SRPGEVCSALNLCES.L   | 3 | 4.34 | 0.34 | -4.74 |
| IPI00012503 | Isoform Sap-mu-0 of Proactivator polypeptide precursor | K.EM*PM*QTLVPAK.V                        | 2 | 2.19 | 0.25 | -3.75 |
| IPI00012503 | Isoform Sap-mu-0 of Proactivator polypeptide precursor | K.GCSFLDPYQK.Q                           | 1 | 2.33 | 0.25 | -2.66 |
| IPI00012503 | Isoform Sap-mu-0 of Proactivator polypeptide precursor | K.GCSFLDPYQK.Q                           | 2 | 3.28 | 0.29 | -3.98 |
| IPI00012503 | Isoform Sap-mu-0 of Proactivator polypeptide precursor | K.HEVPAKSDVYCEVCEFLVK.E                  | 4 | 3.32 | 0.22 | -4.14 |
| IPI00012503 | Isoform Sap-mu-0 of Proactivator polypeptide precursor | K.KLVGYLDR.N                             | 1 | 2.44 | 0.26 | -3.56 |
| IPI00012503 | Isoform Sap-mu-0 of Proactivator polypeptide precursor | K.KLVGYLDR.N                             | 2 | 3.13 | 0.24 | -1.63 |
| IPI00012503 | Isoform Sap-mu-0 of Proactivator polypeptide precursor | K.LVGYLDR.N                              | 1 | 2.05 | 0.08 | -2.18 |
| IPI00012503 | Isoform Sap-mu-0 of Proactivator polypeptide precursor | K.LVGYLDR.N                              | 2 | 2.62 | 0.26 | -3.76 |
| IPI00012503 | Isoform Sap-mu-0 of Proactivator polypeptide precursor | K.LVGYLDRNLEK.N                          | 2 | 3.01 | 0.09 | -3.01 |
| IPI00012503 | Isoform Sap-mu-0 of Proactivator polypeptide precursor | K.NVIPALELVEPIK.K                        | 2 | 2.47 | 0.22 | -3.54 |
| IPI00012503 | Isoform Sap-mu-0 of Proactivator polypeptide precursor | K.NVIPALELVEPIKK.H                       | 2 | 2.49 | 0.34 | -1.75 |
| IPI00012503 | Isoform Sap-mu-0 of Proactivator polypeptide precursor | K.QCDQFVAEYEPVLIIEILVEVM*DPSFVCLK.I      | 3 | 4.20 | 0.41 | -4.30 |
| IPI00012503 | Isoform Sap-mu-0 of Proactivator polypeptide precursor | K.QEILAALEK.G                            | 1 | 2.83 | 0.15 | -3.05 |
| IPI00012503 | Isoform Sap-mu-0 of Proactivator polypeptide precursor | K.QEILAALEK.G                            | 2 | 2.30 | 0.13 | -2.95 |
| IPI00012503 | Isoform Sap-mu-0 of Proactivator polypeptide precursor | K.QLESNKIPELDM*TEVVAPFM*ANIPLLLYPQDGPR.S | 3 | 5.22 | 0.41 | -3.63 |
| IPI00012503 | Isoform Sap-mu-0 of Proactivator polypeptide precursor | K.QLESNKIPELDM*TEVVAPFM*ANIPLLLYPQDGPR.S | 4 | 4.73 | 0.31 | -4.23 |

|             |                                                                            |                                       |   |      |      |       |
|-------------|----------------------------------------------------------------------------|---------------------------------------|---|------|------|-------|
| IPI00012503 | Isoform Sap-mu-0 of Proactivator polypeptide precursor                     | K.SDVYCEVCEFLVK.E                     | 2 | 4.50 | 0.50 | -3.64 |
| IPI00012503 | Isoform Sap-mu-0 of Proactivator polypeptide precursor                     | K.SDVYCEVCEFLVK.E                     | 3 | 2.76 | 0.27 | -1.22 |
| IPI00012503 | Isoform Sap-mu-0 of Proactivator polypeptide precursor                     | K.SLPCDICKDVVTAAGDM*LK.D              | 3 | 2.72 | 0.18 | -1.71 |
| IPI00012503 | Isoform Sap-mu-0 of Proactivator polypeptide precursor                     | N.GDVCQDCIQM*VTDIQTAVR.T              | 2 | 6.29 | 0.54 | -4.29 |
| IPI00012503 | Isoform Sap-mu-0 of Proactivator polypeptide precursor                     | N.GDVCQDCIQM*VTDIQTAVR.T              | 3 | 5.48 | 0.50 | -3.55 |
| IPI00012503 | Isoform Sap-mu-0 of Proactivator polypeptide precursor                     | R.LGPGM*ADICK.N                       | 2 | 3.08 | 0.18 | -1.82 |
| IPI00012503 | Isoform Sap-mu-0 of Proactivator polypeptide precursor                     | R.LPALTVHVTQPK.D                      | 2 | 3.89 | 0.50 | -4.14 |
| IPI00012503 | Isoform Sap-mu-0 of Proactivator polypeptide precursor                     | R.LPALTVHVTQPK.D                      | 3 | 2.97 | 0.32 | -3.58 |
| IPI00012503 | Isoform Sap-mu-0 of Proactivator polypeptide precursor                     | S.DVYCEVCEFLVK.E                      | 2 | 4.32 | 0.34 | -5.01 |
| IPI00012510 | EMILIN-2 precursor                                                         | K.ATDNEPSQFSEPR.K                     | 2 | 2.83 | 0.16 | -5.37 |
| IPI00012510 | EMILIN-2 precursor                                                         | R.TRAPGLSSQHPKPDTTVSGDTETGQSPGVFNTK.E | 3 | 4.39 | 0.42 | -4.03 |
| IPI00012510 | EMILIN-2 precursor                                                         | R.TVLDLQSSLAGVSENLK.H                 | 2 | 5.10 | 0.48 | -1.91 |
| IPI00012545 | Isoform TGN51 of Trans-Golgi network integral membrane protein 2 precursor | K.DGSNKSGAEEQGPIDGPSK.S               | 2 | 4.31 | 0.47 | -2.87 |
| IPI00012545 | Isoform TGN51 of Trans-Golgi network integral membrane protein 2 precursor | K.DGSNKSGAEEQGPIDGPSK.S               | 3 | 4.19 | 0.32 | -1.39 |
| IPI00012545 | Isoform TGN51 of Trans-Golgi network integral membrane protein 2 precursor | K.DGSSKSGAEDQTPKDVPNK.S               | 3 | 2.62 | 0.30 | -1.11 |
| IPI00012545 | Isoform TGN51 of Trans-Golgi network integral membrane protein 2 precursor | K.DHSKPISNPSDNKELPK.A                 | 3 | 4.47 | 0.40 | -2.34 |
| IPI00012545 | Isoform TGN51 of Trans-Golgi network integral membrane protein 2 precursor | K.DHSKPISNPSDNKELPKADTNQLADK.G        | 3 | 3.24 | 0.29 | -3.14 |
| IPI00012545 | Isoform TGN51 of Trans-Golgi network integral membrane protein 2 precursor | K.DHSKPISNPSDNKELPKADTNQLADK.G        | 4 | 3.23 | 0.24 | -2.91 |
| IPI00012545 | Isoform TGN51 of Trans-Golgi network integral membrane protein 2 precursor | K.DSPNKVVPEQPSRK.D                    | 2 | 1.96 | 0.13 | -3.30 |
| IPI00012545 | Isoform TGN51 of Trans-Golgi network integral membrane protein 2 precursor | K.DSPNKVVPEQPSRK.D                    | 3 | 2.87 | 0.25 | -1.41 |
| IPI00012545 | Isoform TGN51 of Trans-Golgi network integral membrane protein 2 precursor | K.DSTGKSGAEAQTPEDSPNR.S               | 2 | 3.65 | 0.52 | -2.12 |
| IPI00012545 | Isoform TGN51 of Trans-Golgi network integral membrane protein 2 precursor | K.DSTGKSGAEAQTPEDSPNR.S               | 3 | 2.81 | 0.14 | -2.25 |



|             |                                                                            |                             |   |      |      |       |
|-------------|----------------------------------------------------------------------------|-----------------------------|---|------|------|-------|
| IPI00012545 | Isoform TGN51 of Trans-Golgi network integral membrane protein 2 precursor | K.DVPNKSGADGQTPK.D          | 2 | 3.07 | 0.37 | -3.60 |
| IPI00012545 | Isoform TGN51 of Trans-Golgi network integral membrane protein 2 precursor | K.M*SGSASSENREGTLD.S        | 2 | 4.25 | 0.53 | -3.63 |
| IPI00012545 | Isoform TGN51 of Trans-Golgi network integral membrane protein 2 precursor | K.SGAEAQTPEDSPNR.S          | 2 | 4.23 | 0.45 | -3.23 |
| IPI00012545 | Isoform TGN51 of Trans-Golgi network integral membrane protein 2 precursor | K.SGAEAQTPEDSPNRSGAEAK.T    | 2 | 4.25 | 0.46 | -2.78 |
| IPI00012545 | Isoform TGN51 of Trans-Golgi network integral membrane protein 2 precursor | K.SGAEDQTPKDVPNK.S          | 2 | 4.18 | 0.38 | -2.34 |
| IPI00012545 | Isoform TGN51 of Trans-Golgi network integral membrane protein 2 precursor | K.SGAEDQTPKDVPNK.S          | 3 | 3.00 | 0.27 | -3.59 |
| IPI00012545 | Isoform TGN51 of Trans-Golgi network integral membrane protein 2 precursor | K.SGAEDQTPKDVPNKSGAEK.Q     | 2 | 5.15 | 0.49 | -4.42 |
| IPI00012545 | Isoform TGN51 of Trans-Golgi network integral membrane protein 2 precursor | K.SGAEDQTPKDVPNKSGAEK.Q     | 3 | 4.36 | 0.42 | -3.34 |
| IPI00012545 | Isoform TGN51 of Trans-Golgi network integral membrane protein 2 precursor | K.SGAEDQTPKDVPNKSGAEKQTPK.D | 4 | 3.11 | 0.12 | 0.19  |
| IPI00012545 | Isoform TGN51 of Trans-Golgi network integral membrane protein 2 precursor | K.SGAEEQGPIDGPSK.S          | 2 | 4.78 | 0.44 | -3.19 |
| IPI00012545 | Isoform TGN51 of Trans-Golgi network integral membrane protein 2 precursor | K.SGAEEQTSKDSPNKVVPEQPSR.K  | 4 | 3.09 | 0.14 | -2.67 |
| IPI00012545 | Isoform TGN51 of Trans-Golgi network integral membrane protein 2 precursor | K.SGAEEQTSKDSPNKVVPEQPSRK.D | 3 | 4.54 | 0.41 | -3.63 |
| IPI00012545 | Isoform TGN51 of Trans-Golgi network integral membrane protein 2 precursor | K.SGAEEQTSKDSPNKVVPEQPSRK.D | 4 | 3.40 | 0.26 | -2.81 |
| IPI00012545 | Isoform TGN51 of Trans-Golgi network integral membrane protein 2 precursor | K.SGSEAQTTKDVPNK.S          | 2 | 3.55 | 0.35 | -4.09 |
| IPI00012545 | Isoform TGN51 of Trans-Golgi network integral membrane protein 2 precursor | K.SGSEAQTTKDVPNKSGADGQTPK.D | 3 | 4.50 | 0.38 | -3.30 |
| IPI00012545 | Isoform TGN51 of Trans-Golgi network integral membrane protein 2 precursor | K.SGSEAQTTKDVPNKSGADGQTPK.D | 4 | 2.86 | 0.15 | -3.06 |
| IPI00012545 | Isoform TGN51 of Trans-Golgi network integral membrane protein 2 precursor | K.SHPELQTPK.D               | 1 | 2.42 | 0.11 | -3.49 |
| IPI00012545 | Isoform TGN51 of Trans-Golgi network integral membrane protein 2 precursor | K.SHPELQTPK.D               | 2 | 2.08 | 0.31 | -1.72 |
| IPI00012545 | Isoform TGN51 of Trans-Golgi network integral membrane protein 2 precursor | K.SHPEPQTPK.D               | 1 | 1.42 | 0.13 | -2.63 |
| IPI00012545 | Isoform TGN51 of Trans-Golgi network integral membrane protein 2 precursor | K.SHPEPQTPK.D               | 2 | 1.94 | 0.18 | -1.82 |
| IPI00012545 | Isoform TGN51 of Trans-Golgi network integral membrane protein 2 precursor | K.SHPEPQTPKDSPSK.S          | 2 | 2.96 | 0.42 | -4.33 |

|             |                                                                            |                                 |   |      |      |       |
|-------------|----------------------------------------------------------------------------|---------------------------------|---|------|------|-------|
| IPI00012545 | Isoform TGN51 of Trans-Golgi network integral membrane protein 2 precursor | K.SSAEAQTPEDTPNK.S              | 2 | 4.48 | 0.37 | -4.38 |
| IPI00012545 | Isoform TGN51 of Trans-Golgi network integral membrane protein 2 precursor | K.SSAEAQTPEDTPNKSGAEAK.T        | 2 | 5.08 | 0.47 | -4.32 |
| IPI00012545 | Isoform TGN51 of Trans-Golgi network integral membrane protein 2 precursor | K.SSAEAQTPEDTPNKSGAEAK.T        | 3 | 3.63 | 0.21 | -3.41 |
| IPI00012545 | Isoform TGN51 of Trans-Golgi network integral membrane protein 2 precursor | K.SSEPTEDVEPK.E                 | 2 | 2.41 | 0.24 | -2.52 |
| IPI00012545 | Isoform TGN51 of Trans-Golgi network integral membrane protein 2 precursor | K.TESGEETDLISPPQEEVK.S          | 2 | 4.31 | 0.37 | -3.46 |
| IPI00012545 | Isoform TGN51 of Trans-Golgi network integral membrane protein 2 precursor | K.VVPEQPSR.K                    | 2 | 1.48 | 0.18 | -3.08 |
| IPI00012585 | Beta-hexosaminidase beta chain precursor                                   | K.DSAYPEELSR.V                  | 1 | 1.89 | 0.08 | -3.15 |
| IPI00012585 | Beta-hexosaminidase beta chain precursor                                   | K.DVRDM*DDAYDR.L                | 3 | 2.76 | 0.32 | -3.69 |
| IPI00012585 | Beta-hexosaminidase beta chain precursor                                   | K.EISEVFPDQFIHLGGDEVEFK.C       | 2 | 4.15 | 0.51 | -3.57 |
| IPI00012585 | Beta-hexosaminidase beta chain precursor                                   | K.EISEVFPDQFIHLGGDEVEFK.C       | 3 | 2.59 | 0.32 | -6.07 |
| IPI00012585 | Beta-hexosaminidase beta chain precursor                                   | K.EPVAVLK.A                     | 1 | 1.79 | 0.06 | -1.56 |
| IPI00012585 | Beta-hexosaminidase beta chain precursor                                   | K.FNVLHWHIVDDQSFPYQSITFPELSNK.G | 3 | 5.20 | 0.41 | -3.48 |
| IPI00012585 | Beta-hexosaminidase beta chain precursor                                   | K.FNVLHWHIVDDQSFPYQSITFPELSNK.G | 4 | 3.62 | 0.28 | -6.03 |
| IPI00012585 | Beta-hexosaminidase beta chain precursor                                   | K.GSYLSHVVTPNDVR.M              | 2 | 4.83 | 0.50 | -4.30 |
| IPI00012585 | Beta-hexosaminidase beta chain precursor                                   | K.GSYLSHVVTPNDVR.M              | 3 | 3.04 | 0.22 | -3.04 |
| IPI00012585 | Beta-hexosaminidase beta chain precursor                                   | K.KLESFYIQK.V                   | 1 | 3.16 | 0.10 | -2.97 |
| IPI00012585 | Beta-hexosaminidase beta chain precursor                                   | K.KLESFYIQK.V                   | 2 | 3.17 | 0.18 | -2.94 |
| IPI00012585 | Beta-hexosaminidase beta chain precursor                                   | K.LAPGTIVEVWK.D                 | 2 | 2.38 | 0.34 | -2.66 |
| IPI00012585 | Beta-hexosaminidase beta chain precursor                                   | K.LAPGTIVEVWKDSAYPEELSR.V       | 2 | 4.82 | 0.55 | -3.08 |
| IPI00012585 | Beta-hexosaminidase beta chain precursor                                   | K.LAPGTIVEVWKDSAYPEELSR.V       | 3 | 3.53 | 0.28 | -4.04 |
| IPI00012585 | Beta-hexosaminidase beta chain precursor                                   | K.PGPALWPLPLSVK.M               | 2 | 3.62 | 0.44 | -3.45 |
| IPI00012585 | Beta-hexosaminidase beta chain precursor                                   | K.TLDAM*AFNK.F                  | 1 | 1.35 | 0.14 | -3.64 |
| IPI00012585 | Beta-hexosaminidase beta chain precursor                                   | K.VLDIIATINK.G                  | 2 | 2.45 | 0.23 | -1.90 |
| IPI00012585 | Beta-hexosaminidase beta chain precursor                                   | K.YYKVEPLDFGGTQK.Q              | 2 | 4.00 | 0.34 | -4.12 |
| IPI00012585 | Beta-hexosaminidase beta chain precursor                                   | R.DM*DDAYDR.L                   | 2 | 2.77 | 0.25 | -2.69 |
| IPI00012585 | Beta-hexosaminidase beta chain precursor                                   | R.GIAAQPLYAGYCNHENM*.-          | 2 | 4.17 | 0.47 | -4.13 |
| IPI00012585 | Beta-hexosaminidase beta chain precursor                                   | R.KYYKVEPLDFGGTQK.Q             | 2 | 4.41 | 0.48 | -4.26 |
| IPI00012585 | Beta-hexosaminidase beta chain precursor                                   | R.M*VIEYAR.L                    | 2 | 2.33 | 0.15 | -2.88 |
| IPI00012792 | Cadherin-5 precursor                                                       | K.ELDSTGTPTGK.E                 | 2 | 2.05 | 0.30 | -2.15 |
| IPI00012792 | Cadherin-5 precursor                                                       | R.YM*SPPAGNR.A                  | 2 | 2.27 | 0.26 | -0.04 |
| IPI00012877 | Isoform 1 of Interferon-alpha/beta receptor alpha chain precursor          | K.LNVYEEIK.L                    | 2 | 2.61 | 0.25 | -1.56 |
| IPI00012887 | Cathepsin L1 precursor                                                     | A.TLTFDHSLEAQWTK.W              | 2 | 3.54 | 0.36 | -3.06 |
| IPI00012887 | Cathepsin L1 precursor                                                     | K.AVATVGPISVAIDAGHESFLFYK.E     | 2 | 3.79 | 0.46 | -1.01 |
| IPI00012887 | Cathepsin L1 precursor                                                     | K.GKVFQEPLFYEAPR.S              | 2 | 4.38 | 0.41 | -1.95 |
| IPI00012887 | Cathepsin L1 precursor                                                     | K.GKVFQEPLFYEAPR.S              | 3 | 3.68 | 0.36 | -1.93 |

|             |                                                                     |                                 |   |      |      |       |
|-------------|---------------------------------------------------------------------|---------------------------------|---|------|------|-------|
| IPI00012887 | Cathepsin L1 precursor                                              | K.GYVTPVK.N                     | 1 | 1.84 | 0.17 | -0.52 |
| IPI00012887 | Cathepsin L1 precursor                                              | K.HSFTM*AM*NAFGDM*TSEEFR.Q      | 3 | 3.73 | 0.37 | -3.97 |
| IPI00012887 | Cathepsin L1 precursor                                              | K.M*IELHNQEYR.E                 | 2 | 3.39 | 0.36 | -2.95 |
| IPI00012887 | Cathepsin L1 precursor                                              | K.M*IELHNQEYR.E                 | 3 | 1.81 | 0.16 | -2.99 |
| IPI00012887 | Cathepsin L1 precursor                                              | K.M*IELHNQEYREGK.H              | 3 | 2.56 | 0.19 | -2.57 |
| IPI00012887 | Cathepsin L1 precursor                                              | K.NSWGEEWGM*GGYVK.M             | 2 | 4.08 | 0.41 | -3.03 |
| IPI00012887 | Cathepsin L1 precursor                                              | K.VFQEPLFYEAPR.S                | 2 | 4.17 | 0.42 | -5.64 |
| IPI00012887 | Cathepsin L1 precursor                                              | R.EKGYVTPVK.N                   | 1 | 2.51 | 0.13 | -2.01 |
| IPI00012887 | Cathepsin L1 precursor                                              | R.EKGYVTPVK.N                   | 2 | 1.54 | 0.32 | -1.62 |
| IPI00012887 | Cathepsin L1 precursor                                              | R.LYGM*NEEGWR.R                 | 2 | 3.29 | 0.43 | -1.56 |
| IPI00012887 | Cathepsin L1 precursor                                              | R.NHCGIASAASYPTV.-              | 2 | 2.18 | 0.14 | -1.86 |
| IPI00012887 | Cathepsin L1 precursor                                              | R.QVM*NGFQNR.K                  | 2 | 2.79 | 0.30 | -1.52 |
| IPI00012887 | Cathepsin L1 precursor                                              | W.AFSATGALEGQM*FR.K             | 2 | 4.41 | 0.50 | -0.83 |
| IPI00012895 | Isoform 1 of Carbonic anhydrase 12 precursor                        | K.YKGQEA FVPGFNIEELLPER.T       | 3 | 2.53 | 0.11 | -0.21 |
| IPI00012948 | Proheparin-binding EGF-like growth factor precursor                 | R.DLQEADL D L L R.V             | 2 | 3.88 | 0.31 | -4.05 |
| IPI00012989 | Lysosomal alpha-mannosidase precursor                               | K.ELVDYFLNVATAQGR.Y             | 2 | 4.58 | 0.46 | -2.32 |
| IPI00012989 | Lysosomal alpha-mannosidase precursor                               | L.DPANITL E P M * E I R.T       | 2 | 3.79 | 0.27 | -3.09 |
| IPI00012989 | Lysosomal alpha-mannosidase precursor                               | R.ASTSLKPPTADLFTGVLPNGYNPPR.N   | 3 | 4.74 | 0.25 | -2.61 |
| IPI00012989 | Lysosomal alpha-mannosidase precursor                               | R.ATFDPDTGLLM*EIM*NM*NQQLLPVR.Q | 3 | 2.86 | 0.19 | -5.40 |
| IPI00012989 | Lysosomal alpha-mannosidase precursor                               | R.DLFSTFTITR.L                  | 2 | 2.67 | 0.23 | -3.13 |
| IPI00012989 | Lysosomal alpha-mannosidase precursor                               | R.FLEDTFGNDGRPR.V               | 2 | 2.16 | 0.14 | -0.66 |
| IPI00012989 | Lysosomal alpha-mannosidase precursor                               | R.HLVLLDTAQAAAAGHR.L            | 3 | 4.97 | 0.51 | -2.90 |
| IPI00012989 | Lysosomal alpha-mannosidase precursor                               | R.IYITDGNM*QLTVLTDR.S           | 2 | 5.21 | 0.47 | -5.56 |
| IPI00012989 | Lysosomal alpha-mannosidase precursor                               | R.LLKDDGR.G                     | 2 | 1.80 | 0.09 | -3.36 |
| IPI00012989 | Lysosomal alpha-mannosidase precursor                               | R.LQETT L V A N Q L R.E         | 2 | 4.27 | 0.35 | -3.29 |
| IPI00012989 | Lysosomal alpha-mannosidase precursor                               | R.QHVANDYAR.Q                   | 2 | 1.39 | 0.18 | -2.70 |
| IPI00012989 | Lysosomal alpha-mannosidase precursor                               | R.QLAAGWGPCEVLLSNALAR.L         | 3 | 3.98 | 0.24 | -4.07 |
| IPI00012989 | Lysosomal alpha-mannosidase precursor                               | W.SPALTIENEHIR.A                | 2 | 3.29 | 0.36 | -4.80 |
| IPI00013004 | Isoform 1 of Pyridoxal kinase                                       | K.VVPLADIITPNQFEAELLSGR.K       | 3 | 2.65 | 0.30 | -4.88 |
| IPI00013096 | Isoform 1 of Receptor-type tyrosine-protein phosphatase T precursor | K.AVGSLDPSADLSSQR.G             | 2 | 3.87 | 0.39 | -3.17 |
| IPI00013096 | Isoform 1 of Receptor-type tyrosine-protein phosphatase T precursor | R.DTALM*VTR.V                   | 2 | 2.60 | 0.16 | -2.92 |
| IPI00013096 | Isoform 1 of Receptor-type tyrosine-protein phosphatase T precursor | R.QLTLQWEPFGYAVTR.C             | 2 | 2.28 | 0.10 | -2.91 |
| IPI00013096 | Isoform 1 of Receptor-type tyrosine-protein phosphatase T precursor | R.SSPGALNVYVK.V                 | 2 | 2.91 | 0.14 | -2.88 |
| IPI00013096 | Isoform 1 of Receptor-type tyrosine-protein phosphatase T precursor | R.VLLTRPGEGGTGPPGPLTTR.T        | 3 | 4.08 | 0.41 | -4.36 |
| IPI00013162 | Isoform 1 of OX-2 membrane glycoprotein precursor                   | K.AVSPENM*VTFSENHGVVIQPAYK.D    | 3 | 2.76 | 0.29 | -1.85 |

|             |                                                   |                                |   |      |      |       |
|-------------|---------------------------------------------------|--------------------------------|---|------|------|-------|
| IPI00013162 | Isoform 1 of OX-2 membrane glycoprotein precursor | K.CSLQNAQEALIVTWQK.K           | 2 | 5.72 | 0.42 | -2.93 |
| IPI00013162 | Isoform 1 of OX-2 membrane glycoprotein precursor | K.CSLQNAQEALIVTWQK.K           | 3 | 4.01 | 0.10 | -2.25 |
| IPI00013162 | Isoform 1 of OX-2 membrane glycoprotein precursor | K.NQVGKEVICQVLHLGTVTDFK.Q      | 3 | 3.71 | 0.39 | -5.33 |
| IPI00013179 | Prostaglandin-H2 D-isomerase precursor            | A.APEAQVSVQPNFQQDK.F           | 1 | 3.94 | 0.51 | -2.40 |
| IPI00013179 | Prostaglandin-H2 D-isomerase precursor            | A.APEAQVSVQPNFQQDK.F           | 2 | 5.88 | 0.54 | -8.98 |
| IPI00013179 | Prostaglandin-H2 D-isomerase precursor            | A.APEAQVSVQPNFQQDK.F           | 3 | 4.17 | 0.33 | -3.83 |
| IPI00013179 | Prostaglandin-H2 D-isomerase precursor            | A.APEAQVSVQPNFQQDKFLGR.W       | 2 | 5.43 | 0.56 | -5.58 |
| IPI00013179 | Prostaglandin-H2 D-isomerase precursor            | A.APEAQVSVQPNFQQDKFLGR.W       | 3 | 5.89 | 0.55 | -5.06 |
| IPI00013179 | Prostaglandin-H2 D-isomerase precursor            | A.GSLGSYSYR.S                  | 1 | 1.93 | 0.26 | -4.54 |
| IPI00013179 | Prostaglandin-H2 D-isomerase precursor            | A.GSLGSYSYR.S                  | 2 | 3.05 | 0.22 | 1.41  |
| IPI00013179 | Prostaglandin-H2 D-isomerase precursor            | A.PATDGGLNLTSTFLRK.N           | 2 | 3.80 | 0.43 | 0.83  |
| IPI00013179 | Prostaglandin-H2 D-isomerase precursor            | A.PEAQVSVQPNFQQDK.F            | 2 | 5.13 | 0.47 | -4.82 |
| IPI00013179 | Prostaglandin-H2 D-isomerase precursor            | A.PEAQVSVQPNFQQDKFLGR.W        | 2 | 5.00 | 0.53 | -5.35 |
| IPI00013179 | Prostaglandin-H2 D-isomerase precursor            | A.PEAQVSVQPNFQQDKFLGR.W        | 3 | 5.20 | 0.50 | -8.48 |
| IPI00013179 | Prostaglandin-H2 D-isomerase precursor            | A.QGFTEDTIVFLPQTDK.C           | 2 | 4.82 | 0.49 | -4.90 |
| IPI00013179 | Prostaglandin-H2 D-isomerase precursor            | A.QVSVQPNFQQDK.F               | 2 | 3.18 | 0.19 | -3.23 |
| IPI00013179 | Prostaglandin-H2 D-isomerase precursor            | A.QVSVQPNFQQDKFLGR.W           | 2 | 3.45 | 0.39 | -2.39 |
| IPI00013179 | Prostaglandin-H2 D-isomerase precursor            | C.KSVVAPATDGGLNLTSTFLR.K       | 2 | 4.77 | 0.53 | -4.07 |
| IPI00013179 | Prostaglandin-H2 D-isomerase precursor            | D.LQAAPEAQVSVQPNFQQDK.F        | 2 | 6.15 | 0.49 | -3.06 |
| IPI00013179 | Prostaglandin-H2 D-isomerase precursor            | D.LQAAPEAQVSVQPNFQQDK.F        | 3 | 3.78 | 0.28 | -2.14 |
| IPI00013179 | Prostaglandin-H2 D-isomerase precursor            | D.TIVFLPQTDK.C                 | 1 | 2.01 | 0.22 | -3.27 |
| IPI00013179 | Prostaglandin-H2 D-isomerase precursor            | D.TIVFLPQTDK.C                 | 2 | 2.97 | 0.16 | -3.27 |
| IPI00013179 | Prostaglandin-H2 D-isomerase precursor            | D.YDQYALLYSQGSK.G              | 2 | 4.84 | 0.51 | -3.28 |
| IPI00013179 | Prostaglandin-H2 D-isomerase precursor            | D.YDQYALLYSQGSKGPGEDFR.M       | 3 | 4.70 | 0.54 | -0.58 |
| IPI00013179 | Prostaglandin-H2 D-isomerase precursor            | E.AQVSVQPNFQQDK.F              | 1 | 2.38 | 0.26 | -2.84 |
| IPI00013179 | Prostaglandin-H2 D-isomerase precursor            | E.AQVSVQPNFQQDK.F              | 2 | 4.05 | 0.39 | -4.01 |
| IPI00013179 | Prostaglandin-H2 D-isomerase precursor            | E.AQVSVQPNFQQDKFLGR.W          | 2 | 5.22 | 0.59 | -2.77 |
| IPI00013179 | Prostaglandin-H2 D-isomerase precursor            | E.DTIVFLPQTDK.C                | 2 | 3.71 | 0.22 | -3.50 |
| IPI00013179 | Prostaglandin-H2 D-isomerase precursor            | E.TDYDQYALLYSQGSK.G            | 2 | 3.38 | 0.27 | -0.92 |
| IPI00013179 | Prostaglandin-H2 D-isomerase precursor            | F.TEDTIVFLPQTDK.C              | 2 | 4.74 | 0.45 | -4.92 |
| IPI00013179 | Prostaglandin-H2 D-isomerase precursor            | G.DLQAAPEAQVSVQPNFQQDK.F       | 2 | 6.44 | 0.56 | -6.56 |
| IPI00013179 | Prostaglandin-H2 D-isomerase precursor            | G.DLQAAPEAQVSVQPNFQQDK.F       | 3 | 5.35 | 0.40 | -5.17 |
| IPI00013179 | Prostaglandin-H2 D-isomerase precursor            | G.DLQAAPEAQVSVQPNFQQDKFLGR.W   | 2 | 4.02 | 0.55 | -2.36 |
| IPI00013179 | Prostaglandin-H2 D-isomerase precursor            | G.DLQAAPEAQVSVQPNFQQDKFLGR.W   | 3 | 3.62 | 0.44 | -3.31 |
| IPI00013179 | Prostaglandin-H2 D-isomerase precursor            | G.FTEDTIVFLPQTDK.C             | 2 | 3.98 | 0.37 | -4.45 |
| IPI00013179 | Prostaglandin-H2 D-isomerase precursor            | G.VLGDQAAPAEQVSVQPNFQQDK.F     | 2 | 5.19 | 0.60 | -4.06 |
| IPI00013179 | Prostaglandin-H2 D-isomerase precursor            | G.VLGDQAAPAEQVSVQPNFQQDK.F     | 3 | 4.54 | 0.37 | -4.34 |
| IPI00013179 | Prostaglandin-H2 D-isomerase precursor            | G.VLGDQAAPAEQVSVQPNFQQDKFLGR.W | 3 | 4.59 | 0.39 | -3.03 |
| IPI00013179 | Prostaglandin-H2 D-isomerase precursor            | K.AQGFTEDTIVFLPQTD.K           | 2 | 3.41 | 0.22 | -4.55 |

|             |                                        |                                   |   |      |      |       |
|-------------|----------------------------------------|-----------------------------------|---|------|------|-------|
| IPI00013179 | Prostaglandin-H2 D-isomerase precursor | K.AQGFTEDTIVFLPQTDK.C             | 1 | 4.58 | 0.43 | -3.12 |
| IPI00013179 | Prostaglandin-H2 D-isomerase precursor | K.AQGFTEDTIVFLPQTDK.C             | 2 | 5.71 | 0.52 | -8.61 |
| IPI00013179 | Prostaglandin-H2 D-isomerase precursor | K.AQGFTEDTIVFLPQTDK.C             | 3 | 5.47 | 0.30 | -5.76 |
| IPI00013179 | Prostaglandin-H2 D-isomerase precursor | K.AQGFTEDTIVFLPQTDKCM*TEQ.-       | 2 | 5.29 | 0.52 | -6.00 |
| IPI00013179 | Prostaglandin-H2 D-isomerase precursor | K.AQGFTEDTIVFLPQTDKCM*TEQ.-       | 3 | 5.73 | 0.51 | -6.42 |
| IPI00013179 | Prostaglandin-H2 D-isomerase precursor | K.AQGFTEDTIVFLPQTDKCMTEQ.-        | 2 | 4.19 | 0.41 | -2.53 |
| IPI00013179 | Prostaglandin-H2 D-isomerase precursor | K.AQGFTEDTIVFLPQTDKCMTEQ.-        | 3 | 4.66 | 0.34 | -7.92 |
| IPI00013179 | Prostaglandin-H2 D-isomerase precursor | K.EKFTAF.C                        | 1 | 1.95 | 0.17 | -2.09 |
| IPI00013179 | Prostaglandin-H2 D-isomerase precursor | K.EKFTAFCK.A                      | 1 | 3.19 | 0.24 | -2.25 |
| IPI00013179 | Prostaglandin-H2 D-isomerase precursor | K.EKFTAFCK.A                      | 2 | 2.01 | 0.16 | -1.77 |
| IPI00013179 | Prostaglandin-H2 D-isomerase precursor | K.FTAFCKAQGFEDTIVFLPQTDK.C        | 3 | 3.18 | 0.26 | -1.31 |
| IPI00013179 | Prostaglandin-H2 D-isomerase precursor | K.GPGEDFR.M                       | 1 | 1.89 | 0.11 | -3.93 |
| IPI00013179 | Prostaglandin-H2 D-isomerase precursor | K.GPGEDFRM*ATLYSR.T               | 3 | 1.95 | 0.12 | -2.79 |
| IPI00013179 | Prostaglandin-H2 D-isomerase precursor | K.KAALSM*CK.S                     | 2 | 1.93 | 0.13 | -3.09 |
| IPI00013179 | Prostaglandin-H2 D-isomerase precursor | K.NQCETRTM*LLQPAGSLGYSYSYR.S      | 3 | 3.46 | 0.37 | -1.35 |
| IPI00013179 | Prostaglandin-H2 D-isomerase precursor | K.SVVAPATD.G                      | 1 | 1.86 | 0.28 | -2.18 |
| IPI00013179 | Prostaglandin-H2 D-isomerase precursor | K.SVVAPATDGGLNLTSTFLR.K           | 2 | 6.16 | 0.62 | -3.92 |
| IPI00013179 | Prostaglandin-H2 D-isomerase precursor | K.SVVAPATDGGLNLTSTFLR.K           | 3 | 4.67 | 0.49 | -2.57 |
| IPI00013179 | Prostaglandin-H2 D-isomerase precursor | K.SVVAPATDGGLNLTSTFLRK.N          | 2 | 4.31 | 0.46 | -2.86 |
| IPI00013179 | Prostaglandin-H2 D-isomerase precursor | K.SVVAPATDGGLNLTSTFLRK.N          | 3 | 2.53 | 0.22 | -2.92 |
| IPI00013179 | Prostaglandin-H2 D-isomerase precursor | L.GDLQAAPEAQVSVQPNFQQDK.F         | 2 | 4.91 | 0.54 | -1.06 |
| IPI00013179 | Prostaglandin-H2 D-isomerase precursor | L.GDLQAAPEAQVSVQPNFQQDK.F         | 3 | 4.12 | 0.25 | -0.83 |
| IPI00013179 | Prostaglandin-H2 D-isomerase precursor | L.GDLQAAPEAQVSVQPNFQQDKFLGR.W     | 3 | 3.57 | 0.28 | -3.03 |
| IPI00013179 | Prostaglandin-H2 D-isomerase precursor | L.LQPAGSLGYSYSYR.S                | 1 | 2.45 | 0.28 | -2.23 |
| IPI00013179 | Prostaglandin-H2 D-isomerase precursor | L.LQPAGSLGYSYSYR.S                | 2 | 3.68 | 0.46 | -2.97 |
| IPI00013179 | Prostaglandin-H2 D-isomerase precursor | L.QPAGSLGYSYSYR.S                 | 1 | 2.00 | 0.16 | -2.13 |
| IPI00013179 | Prostaglandin-H2 D-isomerase precursor | M.LLQPAGSLGYSYSYR.S               | 2 | 4.35 | 0.52 | -4.36 |
| IPI00013179 | Prostaglandin-H2 D-isomerase precursor | P.AGSLGYSYSYR.S                   | 2 | 3.21 | 0.22 | -0.53 |
| IPI00013179 | Prostaglandin-H2 D-isomerase precursor | P.EAQVSVQPNFQQDK.F                | 1 | 2.68 | 0.30 | -2.55 |
| IPI00013179 | Prostaglandin-H2 D-isomerase precursor | P.EAQVSVQPNFQQDK.F                | 2 | 4.46 | 0.44 | -4.66 |
| IPI00013179 | Prostaglandin-H2 D-isomerase precursor | P.EAQVSVQPNFQQDKFLGR.W            | 2 | 4.61 | 0.53 | -2.99 |
| IPI00013179 | Prostaglandin-H2 D-isomerase precursor | Q.AAPEAQVSVQPNFQQDK.F             | 2 | 4.91 | 0.51 | -3.65 |
| IPI00013179 | Prostaglandin-H2 D-isomerase precursor | Q.GFTEDTIVFLPQTDK.C               | 2 | 4.10 | 0.42 | -3.97 |
| IPI00013179 | Prostaglandin-H2 D-isomerase precursor | Q.PAGSLGYSYSYR.S                  | 1 | 3.19 | 0.40 | -8.99 |
| IPI00013179 | Prostaglandin-H2 D-isomerase precursor | Q.PAGSLGYSYSYR.S                  | 2 | 3.73 | 0.45 | -2.86 |
| IPI00013179 | Prostaglandin-H2 D-isomerase precursor | Q.PNFQQDKFLGR.W                   | 1 | 3.15 | 0.33 | -3.03 |
| IPI00013179 | Prostaglandin-H2 D-isomerase precursor | Q.PNFQQDKFLGR.W                   | 2 | 4.40 | 0.45 | -3.01 |
| IPI00013179 | Prostaglandin-H2 D-isomerase precursor | Q.VSVQPNFQQDKFLGR.W               | 2 | 3.94 | 0.43 | -2.79 |
| IPI00013179 | Prostaglandin-H2 D-isomerase precursor | R.M*ATLYSR.T                      | 2 | 2.22 | 0.28 | -6.25 |
| IPI00013179 | Prostaglandin-H2 D-isomerase precursor | R.M*ATLYSRQTTPR.A                 | 3 | 1.85 | 0.22 | -0.13 |
| IPI00013179 | Prostaglandin-H2 D-isomerase precursor | R.MATLYSR.T                       | 2 | 1.66 | 0.17 | -2.17 |
| IPI00013179 | Prostaglandin-H2 D-isomerase precursor | R.SPHWGSTYSVSVVETDQYDQYALLYSGSK.G | 2 | 4.84 | 0.52 |       |

|             |                                          |                                          |   |      |      |       |
|-------------|------------------------------------------|------------------------------------------|---|------|------|-------|
| IPI00013179 | Prostaglandin-H2 D-isomerase precursor   | R.SPHWGSTYSVSVVETDYDQYALLYSQGSK.G        | 3 | 6.67 | 0.59 | -7.50 |
| IPI00013179 | Prostaglandin-H2 D-isomerase precursor   | R.SPHWGSTYSVSVVETDYDQYALLYSQGSKGPGEDFR.M | 3 | 4.86 | 0.52 | -4.84 |
| IPI00013179 | Prostaglandin-H2 D-isomerase precursor   | R.SPHWGSTYSVSVVETDYDQYALLYSQGSKGPGEDFR.M | 4 | 4.69 | 0.41 | -6.14 |
| IPI00013179 | Prostaglandin-H2 D-isomerase precursor   | R.TM*LLQPAGSLGS.Y                        | 1 | 2.69 | 0.42 | -2.91 |
| IPI00013179 | Prostaglandin-H2 D-isomerase precursor   | R.TM*LLQPAGSLGS.Y                        | 2 | 3.41 | 0.30 | -1.90 |
| IPI00013179 | Prostaglandin-H2 D-isomerase precursor   | R.TM*LLQPAGSLGSY.S                       | 1 | 2.81 | 0.44 | -1.81 |
| IPI00013179 | Prostaglandin-H2 D-isomerase precursor   | R.TM*LLQPAGSLGSY.S                       | 2 | 3.63 | 0.42 | -2.18 |
| IPI00013179 | Prostaglandin-H2 D-isomerase precursor   | R.TM*LLQPAGSLGSYS.Y                      | 1 | 2.48 | 0.38 | -1.10 |
| IPI00013179 | Prostaglandin-H2 D-isomerase precursor   | R.TM*LLQPAGSLGSYS.Y                      | 2 | 3.49 | 0.39 | 0.36  |
| IPI00013179 | Prostaglandin-H2 D-isomerase precursor   | R.TM*LLQPAGSLGSYSY.R                     | 1 | 3.26 | 0.50 | -1.49 |
| IPI00013179 | Prostaglandin-H2 D-isomerase precursor   | R.TM*LLQPAGSLGSYSY.R                     | 2 | 3.65 | 0.44 | 0.10  |
| IPI00013179 | Prostaglandin-H2 D-isomerase precursor   | R.TM*LLQPAGSLGSYSYR.S                    | 2 | 5.96 | 0.49 | -8.81 |
| IPI00013179 | Prostaglandin-H2 D-isomerase precursor   | R.TM*LLQPAGSLGSYSYR.S                    | 3 | 5.50 | 0.48 | -4.26 |
| IPI00013179 | Prostaglandin-H2 D-isomerase precursor   | R.TMLQPAGSLGSYSYR.S                      | 2 | 5.31 | 0.51 | -3.64 |
| IPI00013179 | Prostaglandin-H2 D-isomerase precursor   | R.TQTPRAELK.E                            | 2 | 2.22 | 0.06 | -0.48 |
| IPI00013179 | Prostaglandin-H2 D-isomerase precursor   | R.WFSAGLASNSSWLR.E                       | 1 | 3.54 | 0.34 | -0.98 |
| IPI00013179 | Prostaglandin-H2 D-isomerase precursor   | R.WFSAGLASNSSWLR.E                       | 2 | 5.03 | 0.48 | -7.00 |
| IPI00013179 | Prostaglandin-H2 D-isomerase precursor   | S.VQPNFQQDKFLGR.W                        | 2 | 3.04 | 0.44 | -4.87 |
| IPI00013179 | Prostaglandin-H2 D-isomerase precursor   | S.VSVVETDYDQYALLYSQGSKGPGEDFR.M          | 3 | 3.85 | 0.28 | -4.45 |
| IPI00013179 | Prostaglandin-H2 D-isomerase precursor   | S.VVETDYDQYALLYSQGSK.G                   | 2 | 5.82 | 0.58 | -5.60 |
| IPI00013179 | Prostaglandin-H2 D-isomerase precursor   | S.VVETDYDQYALLYSQGSK.G                   | 3 | 5.33 | 0.47 | -3.26 |
| IPI00013179 | Prostaglandin-H2 D-isomerase precursor   | S.VVETDYDQYALLYSQGSKGPGEDFR.M            | 3 | 4.18 | 0.55 | -3.71 |
| IPI00013179 | Prostaglandin-H2 D-isomerase precursor   | T.EDTIVFLPQTDK.C                         | 2 | 3.23 | 0.22 | -4.08 |
| IPI00013179 | Prostaglandin-H2 D-isomerase precursor   | T.M*LLQPAGSLGSYSYR.S                     | 2 | 4.71 | 0.48 | -3.20 |
| IPI00013179 | Prostaglandin-H2 D-isomerase precursor   | V.SVQPNFQQDKFLGR.W                       | 2 | 4.11 | 0.43 | -5.27 |
| IPI00013179 | Prostaglandin-H2 D-isomerase precursor   | V.VETDYDQYALLYSQGSK.G                    | 2 | 5.74 | 0.55 | -3.25 |
| IPI00013179 | Prostaglandin-H2 D-isomerase precursor   | W.GSTYSVSVVETDYDQYALLYSQGSK.G            | 2 | 5.23 | 0.57 | -5.45 |
| IPI00013179 | Prostaglandin-H2 D-isomerase precursor   | W.GSTYSVSVVETDYDQYALLYSQGSK.G            | 3 | 5.57 | 0.54 | -7.45 |
| IPI00013179 | Prostaglandin-H2 D-isomerase precursor   | W.GSTYSVSVVETDYDQYALLYSQGSKGPGEDFR.M     | 3 | 4.49 | 0.54 | -5.28 |
| IPI00013179 | Prostaglandin-H2 D-isomerase precursor   | W.GSTYSVSVVETDYDQYALLYSQGSKGPGEDFR.M     | 4 | 4.81 | 0.49 | -3.13 |
| IPI00013179 | Prostaglandin-H2 D-isomerase precursor   | Y.ALLYSQGSK.G                            | 1 | 2.04 | 0.21 | -3.85 |
| IPI00013179 | Prostaglandin-H2 D-isomerase precursor   | Y.ALLYSQGSKGPGEDFR.M                     | 2 | 3.53 | 0.42 | -5.38 |
| IPI00013179 | Prostaglandin-H2 D-isomerase precursor   | Y.DQYALLYSQGSK.G                         | 2 | 4.01 | 0.47 | -5.26 |
| IPI00013179 | Prostaglandin-H2 D-isomerase precursor   | Y.DQYALLYSQGSKGPGEDFR.M                  | 2 | 5.05 | 0.53 | -3.27 |
| IPI00013179 | Prostaglandin-H2 D-isomerase precursor   | Y.DQYALLYSQGSKGPGEDFR.M                  | 3 | 3.77 | 0.43 | -2.73 |
| IPI00013179 | Prostaglandin-H2 D-isomerase precursor   | Y.SQGSKGPGEDFR.M                         | 2 | 3.22 | 0.41 | -2.42 |
| IPI00013179 | Prostaglandin-H2 D-isomerase precursor   | Y.SVSVVETDYDQYALLYSQGSK.G                | 2 | 6.40 | 0.61 | -5.67 |
| IPI00013179 | Prostaglandin-H2 D-isomerase precursor   | Y.SVSVVETDYDQYALLYSQGSK.G                | 3 | 6.48 | 0.56 | -4.35 |
| IPI00013179 | Prostaglandin-H2 D-isomerase precursor   | Y.SVSVVETDYDQYALLYSQGSKGPGEDFR.M         | 3 | 4.09 | 0.48 | -4.89 |
| IPI00013216 | Origin recognition complex subunit 2     | K.DQNYVEIMGRDVQESLKNGSATG.G              | 2 | 3.72 | 0.14 | 0.63  |
| IPI00013219 | Integrin-linked protein kinase           | R.SVMIDEDMTAR.I                          | 2 | 2.46 | 0.26 | -3.05 |
| IPI00013272 | Isoform 1 of Golgin subfamily A member 4 | R.GKYSSELTAYQM*LQREKK.K                  | 3 | 2.97 | 0.14 | -4.23 |

|             |                                                            |                             |   |      |      |       |
|-------------|------------------------------------------------------------|-----------------------------|---|------|------|-------|
| IPI00013281 | Fukutin-related protein                                    | R.LVAAPVATANPAR.C           | 2 | 3.38 | 0.42 | -4.58 |
| IPI00013290 | hepatoma-derived growth factor-related protein 2 isoform 1 | R.EGPDLDRPGSDRQERER.A       | 2 | 1.45 | 0.09 | 1.82  |
| IPI00013299 | Neuroblastoma, suppression of tumorigenicity 1             | K.LALFPDK.S                 | 1 | 2.35 | 0.22 | -2.79 |
| IPI00013299 | Neuroblastoma, suppression of tumorigenicity 1             | K.LALFPDK.S                 | 2 | 2.37 | 0.11 | -3.65 |
| IPI00013302 | ADAM 15 precursor                                          | R.ESVHTQTPPEHPLGQR.H        | 3 | 3.21 | 0.32 |       |
| IPI00013303 | Limbic system-associated membrane protein precursor        | K.AANEVSSADV.K              | 1 | 2.94 | 0.30 | -3.68 |
| IPI00013303 | Limbic system-associated membrane protein precursor        | K.AANEVSSADV.K              | 2 | 3.82 | 0.41 | -3.35 |
| IPI00013303 | Limbic system-associated membrane protein precursor        | K.CEASAVPAPDFEWYR.D         | 2 | 4.38 | 0.52 | -3.82 |
| IPI00013303 | Limbic system-associated membrane protein precursor        | K.CEASAVPAPDFEWYRDDTR.I     | 2 | 3.63 | 0.43 | -3.50 |
| IPI00013303 | Limbic system-associated membrane protein precursor        | K.CEASAVPAPDFEWYRDDTR.I     | 3 | 2.78 | 0.26 | -3.53 |
| IPI00013303 | Limbic system-associated membrane protein precursor        | K.RHSLEYSR.I                | 2 | 2.48 | 0.17 | -3.77 |
| IPI00013303 | Limbic system-associated membrane protein precursor        | K.TSQVYLIVQVPPK.I           | 2 | 4.51 | 0.43 | -7.19 |
| IPI00013303 | Limbic system-associated membrane protein precursor        | K.TSQVYLIVQVPPK.I           | 3 | 4.72 | 0.29 | -2.96 |
| IPI00013303 | Limbic system-associated membrane protein precursor        | K.VDVYDEGSYTCVQTQHEPK.T     | 2 | 4.77 | 0.57 | -3.10 |
| IPI00013303 | Limbic system-associated membrane protein precursor        | K.VDVYDEGSYTCVQTQHEPK.T     | 3 | 2.62 | 0.34 | -2.94 |
| IPI00013303 | Limbic system-associated membrane protein precursor        | K.VTVNYPPTITESK.S           | 1 | 2.49 | 0.35 | -3.33 |
| IPI00013303 | Limbic system-associated membrane protein precursor        | K.VTVNYPPTITESK.S           | 2 | 3.54 | 0.37 | -4.12 |
| IPI00013303 | Limbic system-associated membrane protein precursor        | R.EFEGEEEYLEILGITR.E        | 2 | 6.13 | 0.48 | -8.15 |
| IPI00013303 | Limbic system-associated membrane protein precursor        | R.EFEGEEEYLEILGITR.E        | 3 | 4.31 | 0.39 | -4.38 |
| IPI00013303 | Limbic system-associated membrane protein precursor        | R.GTDNITVR.Q                | 1 | 2.09 | 0.12 | -2.30 |
| IPI00013303 | Limbic system-associated membrane protein precursor        | R.GTDNITVR.Q                | 2 | 2.64 | 0.07 | -1.58 |
| IPI00013303 | Limbic system-associated membrane protein precursor        | R.HLTPTGREFEGEEEYLEILGITR.E | 3 | 4.35 | 0.42 | -4.47 |
| IPI00013303 | Limbic system-associated membrane protein precursor        | R.HSLEYSR.I                 | 1 | 2.70 | 0.30 | -3.76 |

|             |                                                                |                                           |   |      |      |       |
|-------------|----------------------------------------------------------------|-------------------------------------------|---|------|------|-------|
| IPI00013303 | Limbic system-associated membrane protein precursor            | R.HSLEYSLR.I                              | 2 | 2.61 | 0.21 | -2.64 |
| IPI00013303 | Limbic system-associated membrane protein precursor            | R.INSANGLEIK.S                            | 2 | 3.27 | 0.25 | -1.82 |
| IPI00013303 | Limbic system-associated membrane protein precursor            | R.IQKVDVYDEGSYTCVQQTQHEPK.T               | 3 | 5.16 | 0.46 | -3.81 |
| IPI00013303 | Limbic system-associated membrane protein precursor            | R.QGDTAILR.C                              | 1 | 1.33 | 0.06 | -2.18 |
| IPI00013303 | Limbic system-associated membrane protein precursor            | R.QGDTAILR.C                              | 2 | 1.71 | 0.08 | -2.67 |
| IPI00013303 | Limbic system-associated membrane protein precursor            | R.SGIIFAGHDK.W                            | 1 | 2.25 | 0.28 | -4.50 |
| IPI00013303 | Limbic system-associated membrane protein precursor            | R.SGIIFAGHDK.W                            | 2 | 2.70 | 0.23 | -2.85 |
| IPI00013303 | Limbic system-associated membrane protein precursor            | R.SVDFNRGTDNITVR.Q                        | 3 | 2.92 | 0.26 | -1.34 |
| IPI00013319 | Isoform 2 of 43 kDa receptor-associated protein of the synapse | R.SCPNCRSSM*KPGFV.-                       | 2 | 2.55 | 0.12 |       |
| IPI00013455 | CLIP1 protein                                                  | K.AAQTAEADAMQIMEQM*TK.E                   | 3 | 2.94 | 0.18 |       |
| IPI00013466 | Arsenical pump-driving ATPase                                  | R.SVSEQFKDPEQTTFFICVCAEFLSLYETER.L        | 3 | 4.52 | 0.46 | -2.07 |
| IPI00013475 | Tubulin beta-2A chain                                          | K.GHYTEGAELVDSVLDVVR.K                    | 2 | 2.94 | 0.28 |       |
| IPI00013475 | Tubulin beta-2A chain                                          | K.GHYTEGAELVDSVLDVVR.K                    | 3 | 3.28 | 0.30 | -3.01 |
| IPI00013475 | Tubulin beta-2A chain                                          | K.GHYTEGAELVDSVLDVVR.K                    | 3 | 3.51 | 0.45 | -3.20 |
| IPI00013475 | Tubulin beta-2A chain                                          | K.NM*M*AACDPR.H                           | 2 | 1.73 | 0.12 | 0.11  |
| IPI00013475 | Tubulin beta-2A chain                                          | K.VSDTVVEPYNATLSVHQLVENTDEYSDNEALYDICFR.T | 3 | 5.67 | 0.60 | -3.14 |
| IPI00013475 | Tubulin beta-2A chain                                          | K.VSDTVVEPYNATLSVHQLVENTDEYSDNEALYDICFR.T | 4 | 4.05 | 0.31 | -2.09 |
| IPI00013475 | Tubulin beta-2A chain                                          | R.ISEQFTAM*FR.R                           | 2 | 2.17 | 0.13 | -2.65 |
| IPI00013475 | Tubulin beta-2A chain                                          | R.ISEQFTAMFR.R                            | 2 | 2.87 | 0.27 | -0.81 |
| IPI00013475 | Tubulin beta-2A chain                                          | R.LHFFM*PGFAPLTSR.G                       | 3 | 3.20 | 0.06 | -3.00 |
| IPI00013475 | Tubulin beta-2A chain                                          | R.LHFFMPGFAPLTSR.G                        | 3 | 2.62 | 0.11 | -1.73 |
| IPI00013495 | Isoform 2 of ATP-binding cassette sub-family F member 1        | K.FAALDNEEEDK.E                           | 2 | 2.63 | 0.11 |       |
| IPI00013508 | Alpha-actinin-1                                                | R.ISIEMHGTLEDQLSHLR.Q                     | 3 | 3.48 | 0.21 | -3.89 |
| IPI00013569 | Isoform 1 of Pappalysin-2 precursor                            | K.ESVHLGPLDTFCDIPLTIK.L                   | 3 | 3.40 | 0.16 | -2.54 |
| IPI00013569 | Isoform 1 of Pappalysin-2 precursor                            | R.EAETFNSQVGLPILYFSGR.R                   | 2 | 4.87 | 0.58 | -4.64 |
| IPI00013569 | Isoform 1 of Pappalysin-2 precursor                            | R.LLLRPEVLAEIPR.E                         | 2 | 2.85 | 0.31 | -2.52 |
| IPI00013569 | Isoform 1 of Pappalysin-2 precursor                            | R.LQHEALNEAFSR.Y                          | 2 | 3.64 | 0.39 | -4.77 |
| IPI00013569 | Isoform 1 of Pappalysin-2 precursor                            | R.SKESLGEAGIQK.G                          | 2 | 3.23 | 0.26 | -2.38 |
| IPI00013569 | Isoform 1 of Pappalysin-2 precursor                            | R.SLLLGGDSSEDGHYFR.G                      | 2 | 4.39 | 0.53 | -2.45 |
| IPI00013569 | Isoform 1 of Pappalysin-2 precursor                            | R.SLLLGGDSSEDGHYFR.G                      | 3 | 2.33 | 0.15 | -1.46 |
| IPI00013569 | Isoform 1 of Pappalysin-2 precursor                            | R.VGISAVALR.T                             | 2 | 3.62 | 0.19 | -1.80 |



|             |                                                                             |                                    |   |      |      |       |
|-------------|-----------------------------------------------------------------------------|------------------------------------|---|------|------|-------|
| IPI00013681 | N-terminally extended type 3 canonical transient receptor potential channel | K.CLVVLVALGLPFLAIGYWIAPCSRLGKILR.S | 2 | 1.06 | 0.18 | -5.96 |
| IPI00013682 | Isoform 3 of Ecto-ADP-ribosyltransferase 3 precursor                        | A.EVLDM*ADNAFDDEYLK.C              | 2 | 5.53 | 0.58 | -5.03 |
| IPI00013682 | Isoform 3 of Ecto-ADP-ribosyltransferase 3 precursor                        | K.AHFHYLTR.A                       | 1 | 2.13 | 0.16 | -3.45 |
| IPI00013682 | Isoform 3 of Ecto-ADP-ribosyltransferase 3 precursor                        | K.AHFHYLTR.A                       | 2 | 2.47 | 0.23 | -1.82 |
| IPI00013682 | Isoform 3 of Ecto-ADP-ribosyltransferase 3 precursor                        | K.M*AGQSREDIYGFQFK.A               | 2 | 3.28 | 0.40 | -3.30 |
| IPI00013682 | Isoform 3 of Ecto-ADP-ribosyltransferase 3 precursor                        | K.M*AGQSREDIYGFQFK.A               | 3 | 4.00 | 0.40 | -2.11 |
| IPI00013682 | Isoform 3 of Ecto-ADP-ribosyltransferase 3 precursor                        | K.TCSHYECAFLGGLK.T                 | 3 | 3.22 | 0.29 | -2.56 |
| IPI00013682 | Isoform 3 of Ecto-ADP-ribosyltransferase 3 precursor                        | K.TQIFLPM*NFK.D                    | 2 | 3.01 | 0.10 | -2.54 |
| IPI00013682 | Isoform 3 of Ecto-ADP-ribosyltransferase 3 precursor                        | K.YVPQLLKEEK.A                     | 2 | 2.75 | 0.17 | -3.54 |
| IPI00013682 | Isoform 3 of Ecto-ADP-ribosyltransferase 3 precursor                        | R.EDIYGFQFK.A                      | 2 | 3.41 | 0.38 | -3.09 |
| IPI00013682 | Isoform 3 of Ecto-ADP-ribosyltransferase 3 precursor                        | R.KTQIFLPM*NFK.D                   | 2 | 2.51 | 0.19 | -1.27 |
| IPI00013682 | Isoform 3 of Ecto-ADP-ribosyltransferase 3 precursor                        | R.TSQGTSFTFGGLNQAR.F               | 2 | 5.05 | 0.44 | -3.13 |
| IPI00013682 | Isoform 3 of Ecto-ADP-ribosyltransferase 3 precursor                        | R.TSQGTSFTFGGLNQAR.F               | 3 | 5.11 | 0.42 | -1.77 |
| IPI00013698 | Acid ceramidase precursor                                                   | K.DAM*WIGFLTR.T                    | 2 | 2.37 | 0.23 | -3.75 |
| IPI00013698 | Acid ceramidase precursor                                                   | K.ESLDVYELDAK.Q                    | 2 | 3.61 | 0.34 | -1.32 |
| IPI00013698 | Acid ceramidase precursor                                                   | K.GQFETYLR.D                       | 2 | 1.96 | 0.08 | -3.47 |
| IPI00013698 | Acid ceramidase precursor                                                   | K.GQFETYLRDCPDPCIGW.-              | 2 | 2.66 | 0.11 |       |
| IPI00013698 | Acid ceramidase precursor                                                   | K.LTVYTTLIDVTK.G                   | 2 | 4.11 | 0.45 | -6.52 |
| IPI00013698 | Acid ceramidase precursor                                                   | K.NM*INTFVPSGK.V                   | 2 | 3.08 | 0.34 | 0.29  |
| IPI00013698 | Acid ceramidase precursor                                                   | K.STYPPSGPTYR.G                    | 2 | 2.48 | 0.44 | -3.28 |
| IPI00013698 | Acid ceramidase precursor                                                   | K.VIVNSLK.N                        | 1 | 1.50 | 0.14 | -2.16 |
| IPI00013698 | Acid ceramidase precursor                                                   | K.VM*QVVDEKLPGLLGNFPGPFEEEM*K.G    | 3 | 4.33 | 0.22 | -5.13 |
| IPI00013698 | Acid ceramidase precursor                                                   | R.DRKESLDVYELDAK.Q                 | 2 | 2.49 | 0.20 | -0.43 |
| IPI00013698 | Acid ceramidase precursor                                                   | R.KSTYPPSGPTYR.G                   | 2 | 2.10 | 0.06 | -3.56 |
| IPI00013698 | Acid ceramidase precursor                                                   | R.TSQENISFETM*YDVLSTKPVLNK.L       | 3 | 3.15 | 0.32 | -3.81 |
| IPI00013698 | Acid ceramidase precursor                                                   | R.WYVVQNTYDR.W                     | 2 | 2.96 | 0.31 | -2.55 |
| IPI00013701 | Nociceptin precursor                                                        | K.VFPSPLWTPCTK.V                   | 2 | 2.61 | 0.27 | -3.67 |
| IPI00013701 | Nociceptin precursor                                                        | R.FGGFTGAR.K                       | 2 | 2.36 | 0.21 | -2.75 |
| IPI00013701 | Nociceptin precursor                                                        | R.SLFQEQEPEPGM*EEAGEM*EQK.Q        | 2 | 4.39 | 0.48 | -3.12 |

|             |                                                             |                                   |   |      |      |       |
|-------------|-------------------------------------------------------------|-----------------------------------|---|------|------|-------|
| IPI00013701 | Nociceptin precursor                                        | R.SLFQEQQEEPEPGM*EEAGEM*EQK.Q     | 3 | 3.03 | 0.42 | -5.87 |
| IPI00013749 | Protein kinase C zeta type                                  | R.VIGRGSYAKVLLVRLK.K              | 2 | 3.19 | 0.06 |       |
| IPI00013847 | Cytochrome b-c1 complex subunit 1, mitochondrial precursor  | R.MVLAAGGVEHQQLLDLAQK.H           | 3 | 2.81 | 0.13 | -3.36 |
| IPI00013860 | 3-hydroxyisobutyrate dehydrogenase, mitochondrial precursor | K.DLGLAQDSATSTK.S                 | 2 | 3.23 | 0.33 | -2.63 |
| IPI00013897 | ADAM 10 precursor                                           | K.AIDTIYQTTDFSGIR.N               | 2 | 4.36 | 0.42 | -1.74 |
| IPI00013897 | ADAM 10 precursor                                           | K.ENGNYIM*YAR.A                   | 2 | 1.73 | 0.10 | -1.58 |
| IPI00013897 | ADAM 10 precursor                                           | K.SLNTGIITVQNYGSHVPPK.V           | 3 | 2.09 | 0.16 | -3.83 |
| IPI00013897 | ADAM 10 precursor                                           | R.FEGFIQTR.G                      | 2 | 2.93 | 0.20 | 0.05  |
| IPI00013897 | ADAM 10 precursor                                           | R.HYEGLSYNVDSLHQK.H               | 3 | 3.25 | 0.12 |       |
| IPI00013897 | ADAM 10 precursor                                           | R.TLPFHSVVIHEDDINYPHK.Y           | 3 | 2.30 | 0.30 | -3.75 |
| IPI00013933 | Isoform DPI of Desmoplakin                                  | K.NMPLQHLLLEQIK.E                 | 2 | 2.71 | 0.11 | -6.93 |
| IPI00013945 | Isoform 1 of Uromodulin precursor                           | R.DSTIQVVENGESSQGR.F              | 2 | 4.48 | 0.43 | -0.64 |
| IPI00013945 | Isoform 1 of Uromodulin precursor                           | R.FVGQGGAR.M                      | 1 | 2.35 | 0.07 |       |
| IPI00013976 | Laminin subunit beta-1 precursor                            | K.AM*DLDDQDVLSSALAEVEQLSK.M       | 2 | 6.91 | 0.39 | -3.49 |
| IPI00013976 | Laminin subunit beta-1 precursor                            | K.AM*DLDDQDVLSSALAEVEQLSK.M       | 3 | 4.79 | 0.39 | -3.34 |
| IPI00013976 | Laminin subunit beta-1 precursor                            | K.DVTEM*M*AQVEVK.L                | 2 | 2.65 | 0.22 | -2.50 |
| IPI00013976 | Laminin subunit beta-1 precursor                            | K.EALEEAEKAQVAEEK.A               | 3 | 2.32 | 0.09 | -0.77 |
| IPI00013976 | Laminin subunit beta-1 precursor                            | K.ELDSLQTEAESLDNTVKELAEQLEFIK.N   | 3 | 5.86 | 0.53 | -3.38 |
| IPI00013976 | Laminin subunit beta-1 precursor                            | K.LHTLGDNLLDSR.M                  | 2 | 2.42 | 0.26 | -6.09 |
| IPI00013976 | Laminin subunit beta-1 precursor                            | K.M*DKSNEELR.N                    | 2 | 2.27 | 0.08 | -3.11 |
| IPI00013976 | Laminin subunit beta-1 precursor                            | K.NIGNLFEEAEK.L                   | 2 | 2.44 | 0.18 | -3.02 |
| IPI00013976 | Laminin subunit beta-1 precursor                            | K.TFRPAAM*LIER.S                  | 3 | 3.41 | 0.21 | -1.01 |
| IPI00013976 | Laminin subunit beta-1 precursor                            | K.TLDGELDEK.Y                     | 2 | 2.12 | 0.16 | -2.63 |
| IPI00013976 | Laminin subunit beta-1 precursor                            | K.TLDGELDEKYK.K                   | 2 | 2.63 | 0.20 | -0.68 |
| IPI00013976 | Laminin subunit beta-1 precursor                            | K.TLLAQANSK.L                     | 1 | 2.24 | 0.20 | -1.94 |
| IPI00013976 | Laminin subunit beta-1 precursor                            | K.TLLAQANSK.L                     | 2 | 2.59 | 0.19 | -0.42 |
| IPI00013976 | Laminin subunit beta-1 precursor                            | K.VSEIKDILAQSPAAPLKNIGNLFEEAEK.L  | 3 | 3.14 | 0.22 | -2.21 |
| IPI00013976 | Laminin subunit beta-1 precursor                            | R.ALDPAFKIEDPYSPR.I               | 3 | 3.29 | 0.29 | -1.24 |
| IPI00013976 | Laminin subunit beta-1 precursor                            | R.FGYGDALR.Q                      | 2 | 3.01 | 0.33 | -1.98 |
| IPI00013976 | Laminin subunit beta-1 precursor                            | R.IPSWTGAGFVR.V                   | 2 | 3.21 | 0.36 | -3.15 |
| IPI00013976 | Laminin subunit beta-1 precursor                            | R.KAAQNSGAEAYIEK.V                | 2 | 4.17 | 0.31 | -3.16 |
| IPI00013976 | Laminin subunit beta-1 precursor                            | R.KVSEIKDILAQSPAAPLKN             | 3 | 4.11 | 0.36 | -3.96 |
| IPI00013976 | Laminin subunit beta-1 precursor                            | R.KVSEIKDILAQSPAAPLKNIGNLFEEAEK.L | 5 | 3.34 | 0.26 | -2.58 |
| IPI00013976 | Laminin subunit beta-1 precursor                            | R.LLDELAKG.L                      | 2 | 2.56 | 0.06 | -2.55 |
| IPI00013976 | Laminin subunit beta-1 precursor                            | R.NFLTQDSADLDSIEAVANEVLK.M        | 2 | 6.24 | 0.46 | -6.16 |
| IPI00013976 | Laminin subunit beta-1 precursor                            | R.NFLTQDSADLDSIEAVANEVLK.M        | 3 | 5.78 | 0.42 | -4.06 |
| IPI00013976 | Laminin subunit beta-1 precursor                            | R.NVEELKR.K                       | 2 | 1.91 | 0.05 | -3.03 |
| IPI00013976 | Laminin subunit beta-1 precursor                            | R.SLLKDISQK.V                     | 2 | 2.13 | 0.17 | -2.23 |
| IPI00013976 | Laminin subunit beta-1 precursor                            | R.VESLSQVEVILQHSAAADIAR.A         | 3 | 2.87 | 0.30 | -3.83 |
| IPI00013976 | Laminin subunit beta-1 precursor                            | R.YSDIEPSTEGEVIFR.A               | 2 | 4.88 | 0.45 | -2.76 |

|             |                                                           |                                         |   |      |      |       |
|-------------|-----------------------------------------------------------|-----------------------------------------|---|------|------|-------|
| IPI00013978 | Speckle-type POZ protein                                  | K.NRVEINDVEPEVKEM*M*CFIYTGK.A           | 3 | 3.26 | 0.09 | -4.09 |
| IPI00013991 | Isoform 1 of Tropomyosin beta chain                       | R.LATALQKLEEAEEKADESER.G                | 3 | 3.26 | 0.29 | -3.58 |
| IPI00014048 | Ribonuclease pancreatic precursor                         | K.ERHIIVACEGSPYVPVHFDASVEDST.-          | 3 | 4.21 | 0.42 | -3.27 |
| IPI00014048 | Ribonuclease pancreatic precursor                         | K.SNSSM*HITDCR.L                        | 2 | 2.78 | 0.32 | -2.70 |
| IPI00014048 | Ribonuclease pancreatic precursor                         | K.SNSSM*HITDCR.L                        | 3 | 1.74 | 0.21 | -3.52 |
| IPI00014048 | Ribonuclease pancreatic precursor                         | K.SNSSMHITDCR.L                         | 2 | 3.47 | 0.42 |       |
| IPI00014048 | Ribonuclease pancreatic precursor                         | R.CKPVNTFVHEPLVDVQNVCFQEK.V             | 2 | 4.23 | 0.54 | -2.93 |
| IPI00014048 | Ribonuclease pancreatic precursor                         | R.CKPVNTFVHEPLVDVQNVCFQEK.V             | 3 | 5.44 | 0.51 | -4.63 |
| IPI00014048 | Ribonuclease pancreatic precursor                         | R.CKPVNTFVHEPLVDVQNVCFQEK.V             | 4 | 4.16 | 0.26 | -3.98 |
| IPI00014048 | Ribonuclease pancreatic precursor                         | R.HIIVACEGSPYVPVH.F                     | 2 | 4.35 | 0.62 | -2.43 |
| IPI00014048 | Ribonuclease pancreatic precursor                         | R.HIIVACEGSPYVPVH.F                     | 3 | 3.53 | 0.30 | -1.59 |
| IPI00014048 | Ribonuclease pancreatic precursor                         | R.HIIVACEGSPYVPVH.F.D                   | 2 | 4.36 | 0.57 | -3.41 |
| IPI00014048 | Ribonuclease pancreatic precursor                         | R.HIIVACEGSPYVPVH.F.D                   | 3 | 3.55 | 0.32 | -2.22 |
| IPI00014048 | Ribonuclease pancreatic precursor                         | R.HIIVACEGSPYVPVHFDASVEDST.-            | 2 | 4.69 | 0.53 | -4.74 |
| IPI00014048 | Ribonuclease pancreatic precursor                         | R.HIIVACEGSPYVPVHFDASVEDST.-            | 3 | 5.04 | 0.49 | -5.15 |
| IPI00014048 | Ribonuclease pancreatic precursor                         | R.QHM*DSDSSPSSSSTYCNQM*M*R.R            | 2 | 2.55 | 0.47 | -3.42 |
| IPI00014048 | Ribonuclease pancreatic precursor                         | R.QHM*DSDSSPSSSSTYCNQM*M*R.R            | 3 | 5.92 | 0.61 | -5.08 |
| IPI00014048 | Ribonuclease pancreatic precursor                         | R.QHMDSDSPSSSSTYCNQM*M*R.R              | 2 | 4.48 | 0.37 |       |
| IPI00014048 | Ribonuclease pancreatic precursor                         | R.QHMDSDSPSSSSTYCNQM*M*R.R              | 3 | 4.46 | 0.33 |       |
| IPI00014048 | Ribonuclease pancreatic precursor                         | R.QHMDSDSPSSSSTYCNQM*MR.R               | 3 | 3.51 | 0.09 |       |
| IPI00014048 | Ribonuclease pancreatic precursor                         | R.YPNCAYR.T                             | 2 | 2.35 | 0.22 | -1.45 |
| IPI00014223 | Netrin-G1 ligand precursor                                | K.MTLHPQQIM*IGPRFNR.A                   | 3 | 2.11 | 0.14 | -7.23 |
| IPI00014223 | Netrin-G1 ligand precursor                                | R.NNPESIPSYAFNR.V                       | 2 | 4.73 | 0.49 | -3.34 |
| IPI00014223 | Netrin-G1 ligand precursor                                | R.NNPESIPSYAFNR.V                       | 3 | 2.28 | 0.13 | -1.75 |
| IPI00014340 | Isoform 1 of Protein phosphatase 1 regulatory subunit 12C | K.VELERATQR.Q                           | 2 | 2.03 | 0.10 | 3.07  |
| IPI00014371 | Cadherin-18 precursor                                     | K.VQDINDNAPK.F                          | 2 | 3.01 | 0.20 | -1.76 |
| IPI00014398 | Four and a half LIM domains 1 variant                     | K.AIVAGDQNVYK.G                         | 2 | 3.24 | 0.40 | -1.27 |
| IPI00014439 | Dihydropteridine reductase                                | K.AALDGTPGM*IGYGM*AK.G                  | 2 | 4.08 | 0.41 | -3.25 |
| IPI00014439 | Dihydropteridine reductase                                | K.EGLLTLGAK.A                           | 2 | 2.36 | 0.17 | -0.63 |
| IPI00014439 | Dihydropteridine reductase                                | K.M*TDSFTEQADQVTAEVGK.L                 | 2 | 6.45 | 0.57 | -4.80 |
| IPI00014439 | Dihydropteridine reductase                                | K.M*TDSFTEQADQVTAEVGK.L                 | 3 | 4.62 | 0.44 | -3.87 |
| IPI00014439 | Dihydropteridine reductase                                | K.NRPSSGSLIQVVTTEGR.T                   | 2 | 4.49 | 0.44 | -3.37 |
| IPI00014439 | Dihydropteridine reductase                                | K.NRPSSGSLIQVVTTEGR.T                   | 3 | 4.72 | 0.38 | -3.45 |
| IPI00014444 | Isoform 1 of Protein SERAC1                               | R.IGTSTSPPK.S                           | 2 | 1.94 | 0.22 |       |
| IPI00014516 | Isoform 1 of Caldesmon                                    | K.GNVFSSPTAAGTPNK.E                     | 2 | 1.66 | 0.06 | -1.20 |
| IPI00014537 | Isoform 1 of Calumenin precursor                          | R.QFLMCLSLCTAFALSKPTEK.K                | 2 | 2.11 | 0.07 | 0.94  |
| IPI00014572 | SPARC precursor                                           | K.NVLVTLYER.D                           | 2 | 3.51 | 0.26 | -2.40 |
| IPI00014572 | SPARC precursor                                           | K.NVLVTLYERDEDNLLTEK.Q                  | 2 | 5.32 | 0.45 | -3.86 |
| IPI00014572 | SPARC precursor                                           | K.NVLVTLYERDEDNLLTEK.Q                  | 3 | 4.52 | 0.51 | -4.98 |
| IPI00014572 | SPARC precursor                                           | K.NYNM*YIFPVHWQFGQLDQHPIDGYLSHTELAPLR.A | 4 | 4.92 | 0.39 | -2.88 |
| IPI00014572 | SPARC precursor                                           | K.QKDIDKDLVI.-                          | 1 | 1.57 | 0.12 | -1.23 |

|             |                                                      |                                       |   |      |      |       |
|-------------|------------------------------------------------------|---------------------------------------|---|------|------|-------|
| IPI00014572 | SPARC precursor                                      | K.RLEAGDHPVELLAR.D                    | 2 | 4.43 | 0.41 | -1.77 |
| IPI00014572 | SPARC precursor                                      | K.RLEAGDHPVELLAR.D                    | 3 | 3.40 | 0.33 | -0.34 |
| IPI00014572 | SPARC precursor                                      | K.TFDSSCHFFATK.C                      | 2 | 3.71 | 0.36 |       |
| IPI00014572 | SPARC precursor                                      | K.VCELDENNTPM*CVCQDPTSCPAPIGEFEK.V    | 3 | 5.44 | 0.39 |       |
| IPI00014572 | SPARC precursor                                      | K.YIALDEWAGCFGIK.Q                    | 2 | 4.97 | 0.51 | -3.25 |
| IPI00014572 | SPARC precursor                                      | K.YIPPCLDSELTFFPLR.M                  | 2 | 2.72 | 0.39 | -3.44 |
| IPI00014572 | SPARC precursor                                      | K.YIPPCLDSELTFFPLR.M                  | 3 | 3.83 | 0.24 | -2.04 |
| IPI00014572 | SPARC precursor                                      | L.DQHPIDGYLSHTELAPLR.A                | 3 | 3.59 | 0.37 | -3.86 |
| IPI00014572 | SPARC precursor                                      | L.YERDEDNLLTEK.Q                      | 2 | 4.37 | 0.46 | -2.78 |
| IPI00014572 | SPARC precursor                                      | R.DEDNLLTEK.Q                         | 2 | 3.38 | 0.30 | -2.82 |
| IPI00014572 | SPARC precursor                                      | R.FFETCDLDNDKYIALDEWAGCFGIK.Q         | 3 | 5.03 | 0.51 | -3.74 |
| IPI00014572 | SPARC precursor                                      | R.LEAGDHPVELLAR.D                     | 1 | 2.86 | 0.34 | -1.31 |
| IPI00014572 | SPARC precursor                                      | R.LEAGDHPVELLAR.D                     | 2 | 3.98 | 0.42 | -2.35 |
| IPI00014572 | SPARC precursor                                      | R.LEAGDHPVELLAR.D                     | 3 | 2.51 | 0.25 | -2.27 |
| IPI00014572 | SPARC precursor                                      | Y.ERDEDNLLTEK.Q                       | 2 | 4.08 | 0.32 | -2.62 |
| IPI00014572 | SPARC precursor                                      | Y.IALDEWAGCFGIK.Q                     | 2 | 4.28 | 0.47 | -1.77 |
| IPI00014592 | Chondroadherin precursor                             | K.FSDGAFGLVTTLK.H                     | 2 | 4.75 | 0.44 | -6.02 |
| IPI00014592 | Chondroadherin precursor                             | R.AGAFDDLTELTYLYLDHNK.V               | 2 | 3.54 | 0.39 | -2.51 |
| IPI00014592 | Chondroadherin precursor                             | R.AGAFDDLTELTYLYLDHNK.V               | 3 | 3.12 | 0.36 | -3.78 |
| IPI00014592 | Chondroadherin precursor                             | R.AGAFDDLTELTYLYLDHNVTELPR.G          | 4 | 3.53 | 0.41 | -2.62 |
| IPI00014592 | Chondroadherin precursor                             | R.LNQLPSNFPFDSLETLALTNNPWK.C          | 3 | 4.17 | 0.34 | -4.80 |
| IPI00014592 | Chondroadherin precursor                             | R.NNFPVLAANSFR.A                      | 2 | 3.19 | 0.38 | -3.26 |
| IPI00014592 | Chondroadherin precursor                             | R.NQLSSYPSAASK.L                      | 2 | 3.67 | 0.42 | -2.34 |
| IPI00014592 | Chondroadherin precursor                             | R.VVEELKLSHNPLK.S                     | 2 | 3.76 | 0.30 | -3.50 |
| IPI00014592 | Chondroadherin precursor                             | R.WLYLSENALSSLQPGALDDVENLAK.F         | 3 | 4.16 | 0.44 | -4.63 |
| IPI00014592 | Chondroadherin precursor                             | R.YLETWLWDNTNLEK.F                    | 2 | 4.92 | 0.37 | -0.62 |
| IPI00014850 | Astrocytic phosphoprotein PEA-15                     | R.RPDLLTM*VVDYR.T                     | 3 | 3.30 | 0.33 | -2.96 |
| IPI00014899 | CDNA FLJ20744 fis, clone HEP06585                    | R.LPCLHPAGHREASSAPAR.C                | 3 | 2.22 | 0.11 | -8.71 |
| IPI00014964 | Lymphocyte antigen 6H precursor                      | K.M*CASSCDFVK.R                       | 2 | 2.82 | 0.37 | -1.29 |
| IPI00014964 | Lymphocyte antigen 6H precursor                      | K.M*CASSCDFVKR.H                      | 2 | 3.13 | 0.26 | -2.52 |
| IPI00014964 | Lymphocyte antigen 6H precursor                      | K.QCQPSDTCASVR.I                      | 2 | 3.72 | 0.42 | -3.09 |
| IPI00014964 | Lymphocyte antigen 6H precursor                      | K.VDVDCCEK.D                          | 2 | 2.25 | 0.23 | -1.39 |
| IPI00014964 | Lymphocyte antigen 6H precursor                      | R.HFFSDYLM*GFINSILK.V                 | 2 | 4.51 | 0.41 | -3.61 |
| IPI00014964 | Lymphocyte antigen 6H precursor                      | R.HFFSDYLM*GFINSILK.V                 | 3 | 4.92 | 0.34 | -4.16 |
| IPI00014964 | Lymphocyte antigen 6H precursor                      | R.ITDPSSSR.K                          | 2 | 1.98 | 0.05 | -1.90 |
| IPI00014964 | Lymphocyte antigen 6H precursor                      | R.ITDPSSSRK.D                         | 2 | 2.44 | 0.10 | -3.83 |
| IPI00015047 | 8D6 antigen (Fragment)                               | R.APAEVALEIEGPWTLMEIRGARM*GNLPQPELR.G | 4 | 2.74 | 0.15 | -4.39 |
| IPI00015049 | Isoform 2 of Repulsive guidance molecule A precursor | K.CNSEFWSATSGSHAPASDDTPEFCAALR.S      | 3 | 6.07 | 0.59 | -2.69 |
| IPI00015049 | Isoform 2 of Repulsive guidance molecule A precursor | K.NFQECVDQK.V                         | 1 | 2.25 | 0.07 | -5.04 |

|             |                                                      |                                    |   |      |      |       |
|-------------|------------------------------------------------------|------------------------------------|---|------|------|-------|
| IPI00015049 | Isoform 2 of Repulsive guidance molecule A precursor | K.NFQECVDQK.V                      | 2 | 2.68 | 0.13 | -2.18 |
| IPI00015049 | Isoform 2 of Repulsive guidance molecule A precursor | K.VSGQHVEIQAK.Y                    | 1 | 2.97 | 0.21 | -3.51 |
| IPI00015049 | Isoform 2 of Repulsive guidance molecule A precursor | K.VSGQHVEIQAK.Y                    | 2 | 3.70 | 0.33 | -3.01 |
| IPI00015049 | Isoform 2 of Repulsive guidance molecule A precursor | K.VYQAEM*DELPAAFVDGSK.N            | 2 | 5.32 | 0.53 | -4.71 |
| IPI00015049 | Isoform 2 of Repulsive guidance molecule A precursor | K.YIGTTIVVR.Q                      | 2 | 1.84 | 0.19 | -3.02 |
| IPI00015049 | Isoform 2 of Repulsive guidance molecule A precursor | R.SYALCTR.R                        | 1 | 1.51 | 0.07 | -2.82 |
| IPI00015102 | Isoform 1 of CD166 antigen precursor                 | G.WYTVNSAYGDTIIIPCR.L              | 2 | 4.76 | 0.50 | -4.26 |
| IPI00015102 | Isoform 1 of CD166 antigen precursor                 | G.WYTVNSAYGDTIIIPCR.L              | 3 | 3.91 | 0.13 | -3.09 |
| IPI00015102 | Isoform 1 of CD166 antigen precursor                 | G.WYTVNSAYGDTIIIPCR.LDVPQNLN*FGK.W | 3 | 4.39 | 0.35 | -1.92 |
| IPI00015102 | Isoform 1 of CD166 antigen precursor                 | K.ADIQM*PFTCSVTYYGSPGQK.T          | 2 | 5.67 | 0.55 | -4.13 |
| IPI00015102 | Isoform 1 of CD166 antigen precursor                 | K.ADIQM*PFTCSVTYYGSPGQK.T          | 3 | 3.62 | 0.22 | -2.05 |
| IPI00015102 | Isoform 1 of CD166 antigen precursor                 | K.ALFLETEQLK.K                     | 1 | 2.48 | 0.14 | -3.45 |
| IPI00015102 | Isoform 1 of CD166 antigen precursor                 | K.ALFLETEQLK.K                     | 2 | 3.81 | 0.19 | -3.35 |
| IPI00015102 | Isoform 1 of CD166 antigen precursor                 | K.ALFLETEQLK.L                     | 2 | 2.75 | 0.21 | -2.62 |
| IPI00015102 | Isoform 1 of CD166 antigen precursor                 | K.CLGNGNPPPEEFLFYLPQGPEGIR.S       | 2 | 4.41 | 0.51 | -3.72 |
| IPI00015102 | Isoform 1 of CD166 antigen precursor                 | K.CLGNGNPPPEEFLFYLPQGPEGIR.S       | 3 | 4.51 | 0.38 | -4.76 |
| IPI00015102 | Isoform 1 of CD166 antigen precursor                 | K.EM*DPVTQLYTM*TSTLEYK.T           | 2 | 5.29 | 0.54 | -5.29 |
| IPI00015102 | Isoform 1 of CD166 antigen precursor                 | K.EM*DPVTQLYTM*TSTLEYK.T           | 3 | 4.36 | 0.54 | -4.75 |
| IPI00015102 | Isoform 1 of CD166 antigen precursor                 | K.KSVQYDDVPEYKDR.L                 | 2 | 4.91 | 0.50 | -1.51 |
| IPI00015102 | Isoform 1 of CD166 antigen precursor                 | K.KSVQYDDVPEYKDR.L                 | 3 | 3.58 | 0.32 | -1.60 |
| IPI00015102 | Isoform 1 of CD166 antigen precursor                 | K.SM*IASTAITVHYLDLSLNPSGEVTR.Q     | 2 | 4.72 | 0.52 | -2.02 |
| IPI00015102 | Isoform 1 of CD166 antigen precursor                 | K.SM*IASTAITVHYLDLSLNPSGEVTR.Q     | 3 | 5.96 | 0.38 | -4.62 |
| IPI00015102 | Isoform 1 of CD166 antigen precursor                 | K.SVQYDDVPEYK.D                    | 2 | 2.70 | 0.24 | -2.81 |
| IPI00015102 | Isoform 1 of CD166 antigen precursor                 | K.SVQYDDVPEYKDR.L                  | 2 | 2.14 | 0.19 | -4.07 |
| IPI00015102 | Isoform 1 of CD166 antigen precursor                 | K.SVQYDDVPEYKDR.L                  | 3 | 2.56 | 0.17 | -1.15 |
| IPI00015102 | Isoform 1 of CD166 antigen precursor                 | K.TIHSEQAVFDIYYPTQVTIQVLPK.N       | 3 | 4.53 | 0.38 | -4.31 |
| IPI00015102 | Isoform 1 of CD166 antigen precursor                 | K.VFKQPSKPEIVSK.A                  | 3 | 2.75 | 0.23 | -2.60 |
| IPI00015102 | Isoform 1 of CD166 antigen precursor                 | K.VLHPLEGAVVIFK.K                  | 2 | 2.17 | 0.26 | -4.76 |
| IPI00015102 | Isoform 1 of CD166 antigen precursor                 | K.VLHPLEGAVVIFK.K.E                | 2 | 3.65 | 0.47 | -3.95 |
| IPI00015102 | Isoform 1 of CD166 antigen precursor                 | K.VLHPLEGAVVIFK.K.E                | 3 | 4.39 | 0.50 | -2.97 |
| IPI00015102 | Isoform 1 of CD166 antigen precursor                 | K.VLHPLEGAVVIFK.K.E                | 4 | 5.02 | 0.39 | -4.59 |
| IPI00015102 | Isoform 1 of CD166 antigen precursor                 | K.WKYEKPDGSPVFIADR.S               | 3 | 3.56 | 0.19 | -2.80 |
| IPI00015102 | Isoform 1 of CD166 antigen precursor                 | K.YEKPDGSPVFIADR.S                 | 2 | 3.78 | 0.42 | -2.87 |
| IPI00015102 | Isoform 1 of CD166 antigen precursor                 | K.YEKPDGSPVFIADR.S                 | 3 | 3.28 | 0.35 | -2.21 |
| IPI00015102 | Isoform 1 of CD166 antigen precursor                 | R.ESLTLIVEGKPKI.M                  | 2 | 3.15 | 0.36 | -3.48 |
| IPI00015102 | Isoform 1 of CD166 antigen precursor                 | R.ESLTLIVEGKPKI.M                  | 3 | 2.17 | 0.14 | -2.06 |

|             |                                                  |                                   |   |      |      |       |
|-------------|--------------------------------------------------|-----------------------------------|---|------|------|-------|
| IPI00015102 | Isoform 1 of CD166 antigen precursor             | R.FVCM*LVTEDNVFEAPTIVK.V          | 2 | 5.56 | 0.53 | -4.82 |
| IPI00015102 | Isoform 1 of CD166 antigen precursor             | R.FVCM*LVTEDNVFEAPTIVK.V          | 3 | 4.48 | 0.45 | -4.08 |
| IPI00015102 | Isoform 1 of CD166 antigen precursor             | R.LDV PQNLM*FGK.W                 | 1 | 1.92 | 0.23 | -3.92 |
| IPI00015102 | Isoform 1 of CD166 antigen precursor             | R.LDV PQNLM*FGK.W                 | 2 | 3.56 | 0.44 | 0.49  |
| IPI00015102 | Isoform 1 of CD166 antigen precursor             | R.QIGDALPV SCTISASR.N             | 2 | 4.02 | 0.54 | -3.18 |
| IPI00015102 | Isoform 1 of CD166 antigen precursor             | R.SSNTYTLTDV R.R                  | 1 | 2.14 | 0.14 | -3.19 |
| IPI00015102 | Isoform 1 of CD166 antigen precursor             | R.SSNTYTLTDV R.R                  | 2 | 3.44 | 0.27 | -2.42 |
| IPI00015102 | Isoform 1 of CD166 antigen precursor             | R.SSNTYTLTDV RR.N                 | 2 | 2.41 | 0.22 | -3.37 |
| IPI00015102 | Isoform 1 of CD166 antigen precursor             | R.SSNTYTLTDV RR.N                 | 3 | 1.69 | 0.25 | -3.29 |
| IPI00015102 | Isoform 1 of CD166 antigen precursor             | R.SSPSFSSLHYQDAGNYVCETALQEVEGLK.K | 2 | 3.90 | 0.59 | -1.97 |
| IPI00015102 | Isoform 1 of CD166 antigen precursor             | R.SSPSFSSLHYQDAGNYVCETALQEVEGLK.K | 3 | 6.43 | 0.54 | -4.21 |
| IPI00015148 | Ras-related protein Rap-1b precursor             | K.SALTVQFVQGIFVEK.Y               | 2 | 3.76 | 0.33 | -3.93 |
| IPI00015260 | Protein kinase C-binding protein NELL2 precursor | G.LGVDP SLQIDV LTELELGESTTGVR.Q   | 2 | 6.15 | 0.61 | -4.83 |
| IPI00015260 | Protein kinase C-binding protein NELL2 precursor | G.LGVDP SLQIDV LTELELGESTTGVR.Q   | 3 | 4.83 | 0.49 | -5.96 |
| IPI00015260 | Protein kinase C-binding protein NELL2 precursor | K.AFLFQDTPR.S                     | 1 | 2.37 | 0.24 | -3.30 |
| IPI00015260 | Protein kinase C-binding protein NELL2 precursor | K.AFLFQDTPR.S                     | 2 | 3.30 | 0.35 | -4.21 |
| IPI00015260 | Protein kinase C-binding protein NELL2 precursor | K.ASTATAEQFFQK.L                  | 1 | 3.25 | 0.35 | -2.48 |
| IPI00015260 | Protein kinase C-binding protein NELL2 precursor | K.ASTATAEQFFQK.L                  | 2 | 4.00 | 0.37 | -2.52 |
| IPI00015260 | Protein kinase C-binding protein NELL2 precursor | K.ASTATAEQFFQKLR.N                | 2 | 3.30 | 0.33 | -3.76 |
| IPI00015260 | Protein kinase C-binding protein NELL2 precursor | K.GYDFCSER.H                      | 1 | 1.35 | 0.06 | -3.56 |
| IPI00015260 | Protein kinase C-binding protein NELL2 precursor | K.HGTECTLCQCK.N                   | 2 | 3.76 | 0.55 | -2.85 |
| IPI00015260 | Protein kinase C-binding protein NELL2 precursor | K.HNGQI WVLENDR.C                 | 2 | 4.26 | 0.42 | -6.43 |
| IPI00015260 | Protein kinase C-binding protein NELL2 precursor | K.IM*ELQDILAK.T                   | 1 | 3.26 | 0.22 | -3.08 |
| IPI00015260 | Protein kinase C-binding protein NELL2 precursor | K.IM*ELQDILAK.T                   | 2 | 3.92 | 0.26 | -3.98 |
| IPI00015260 | Protein kinase C-binding protein NELL2 precursor | K.LVESSGCPALDCPESHQITLSHSCCK.V    | 3 | 4.26 | 0.48 | -3.37 |
| IPI00015260 | Protein kinase C-binding protein NELL2 precursor | K.NGHICCSVDPQCLQEL.-              | 2 | 5.00 | 0.54 | -2.89 |
| IPI00015260 | Protein kinase C-binding protein NELL2 precursor | K.NGHICCSVDPQCLQEL.-              | 3 | 3.35 | 0.36 | -2.26 |
| IPI00015260 | Protein kinase C-binding protein NELL2 precursor | K.SALAYVDGK.C                     | 1 | 2.76 | 0.22 | -3.72 |
| IPI00015260 | Protein kinase C-binding protein NELL2 precursor | K.SALAYVDGK.C                     | 2 | 3.11 | 0.21 | -3.47 |
| IPI00015260 | Protein kinase C-binding protein NELL2 precursor | K.SICQFQGR.T                      | 2 | 2.67 | 0.23 | -1.55 |
| IPI00015260 | Protein kinase C-binding protein NELL2 precursor | K.TCLDEM*NVVR.F                   | 2 | 3.07 | 0.15 | -2.45 |
| IPI00015260 | Protein kinase C-binding protein NELL2 precursor | N.NAHGYFK.G                       | 1 | 2.06 | 0.19 | -4.87 |
| IPI00015260 | Protein kinase C-binding protein NELL2 precursor | Q.IDV LTELELGESTTGVR.Q            | 3 | 4.35 | 0.49 | -3.30 |
| IPI00015260 | Protein kinase C-binding protein NELL2 precursor | R.ALREDNAYCEDIDECAEGR.H           | 2 | 4.81 | 0.60 | -4.36 |
| IPI00015260 | Protein kinase C-binding protein NELL2 precursor | R.ALREDNAYCEDIDECAEGR.H           | 3 | 5.61 | 0.45 | -3.54 |
| IPI00015260 | Protein kinase C-binding protein NELL2 precursor | R.CVTDPCQADTIR.N                  | 2 | 3.94 | 0.34 | -4.69 |
| IPI00015260 | Protein kinase C-binding protein NELL2 precursor | R.CVTDPCQADTIRNDITK.T             | 2 | 3.47 | 0.37 | -3.23 |
| IPI00015260 | Protein kinase C-binding protein NELL2 precursor | R.CVTDPCQADTIRNDITK.T             | 3 | 2.36 | 0.18 | -2.94 |
| IPI00015260 | Protein kinase C-binding protein NELL2 precursor | R.ENTM*CVNTPGSFM*CICK.T           | 2 | 4.38 | 0.53 | -4.15 |
| IPI00015260 | Protein kinase C-binding protein NELL2 precursor | R.FTGSSWIK.H                      | 1 | 1.16 | 0.09 | -2.86 |
| IPI00015260 | Protein kinase C-binding protein NELL2 precursor | R.FTGSSWIK.H                      | 2 | 2.31 | 0.14 | -1.84 |
| IPI00015260 | Protein kinase C-binding protein NELL2 precursor | R.HNCM*ENSICR.N                   | 2 | 2.32 | 0.31 | -4.30 |

|             |                                                         |                                                 |   |      |      |       |
|-------------|---------------------------------------------------------|-------------------------------------------------|---|------|------|-------|
| IPI00015260 | Protein kinase C-binding protein NELL2 precursor        | R.LDQCYCER.T                                    | 2 | 3.30 | 0.25 | -3.32 |
| IPI00015260 | Protein kinase C-binding protein NELL2 precursor        | R.LSSQCLHQNGETLYNSGDTWVQNCQCCR.C                | 3 | 4.98 | 0.47 | -0.81 |
| IPI00015260 | Protein kinase C-binding protein NELL2 precursor        | R.M*VDCENPTVDLFCCPECDPR.L                       | 2 | 4.09 | 0.62 | -3.05 |
| IPI00015260 | Protein kinase C-binding protein NELL2 precursor        | R.M*VDCENPTVDLFCCPECDPR.L                       | 3 | 5.90 | 0.53 | -3.82 |
| IPI00015260 | Protein kinase C-binding protein NELL2 precursor        | R.NNAHGYPK.G                                    | 1 | 2.41 | 0.12 | -4.26 |
| IPI00015260 | Protein kinase C-binding protein NELL2 precursor        | R.NNAHGYPK.G                                    | 2 | 2.24 | 0.11 | -3.64 |
| IPI00015260 | Protein kinase C-binding protein NELL2 precursor        | R.NTVYSSSGVCVLYECK.D                            | 2 | 5.60 | 0.56 | -2.87 |
| IPI00015260 | Protein kinase C-binding protein NELL2 precursor        | R.NTVYSSSGVCVLYECKDQTM*K.L                      | 2 | 3.79 | 0.42 | -2.05 |
| IPI00015260 | Protein kinase C-binding protein NELL2 precursor        | R.SIKASTATAEQFFQK.L                             | 2 | 4.16 | 0.40 | -4.43 |
| IPI00015260 | Protein kinase C-binding protein NELL2 precursor        | R.SIKASTATAEQFFQK.L                             | 3 | 3.76 | 0.11 | -3.97 |
| IPI00015260 | Protein kinase C-binding protein NELL2 precursor        | R.TCPTCNDFHGLVQK.I                              | 2 | 4.24 | 0.41 | -4.09 |
| IPI00015260 | Protein kinase C-binding protein NELL2 precursor        | R.TYFEGER.N                                     | 1 | 2.14 | 0.14 | -1.49 |
| IPI00015260 | Protein kinase C-binding protein NELL2 precursor        | R.TYFEGER.N                                     | 2 | 2.45 | 0.13 | -1.87 |
| IPI00015260 | Protein kinase C-binding protein NELL2 precursor        | R.VVEKPSTDLPLGTTF.W                             | 2 | 3.39 | 0.43 | -2.48 |
| IPI00015260 | Protein kinase C-binding protein NELL2 precursor        | R.VVEKPSTDLPLGTTFWLGQR.N                        | 2 | 5.25 | 0.53 | -2.85 |
| IPI00015260 | Protein kinase C-binding protein NELL2 precursor        | R.VVEKPSTDLPLGTTFWLGQR.N                        | 3 | 4.55 | 0.43 | -4.17 |
| IPI00015260 | Protein kinase C-binding protein NELL2 precursor        | R.VVEKPSTDLPLGTTFWLGQR.N                        | 4 | 3.25 | 0.17 | -2.00 |
| IPI00015260 | Protein kinase C-binding protein NELL2 precursor        | R.YLELESSGHR.N                                  | 1 | 2.27 | 0.33 | -3.69 |
| IPI00015260 | Protein kinase C-binding protein NELL2 precursor        | R.YLELESSGHR.N                                  | 2 | 2.98 | 0.30 | -2.97 |
| IPI00015260 | Protein kinase C-binding protein NELL2 precursor        | R.YLELESSGHRNEVR.L                              | 2 | 3.55 | 0.32 | -4.38 |
| IPI00015260 | Protein kinase C-binding protein NELL2 precursor        | R.YLELESSGHRNEVR.L                              | 3 | 2.10 | 0.26 | -2.55 |
| IPI00015260 | Protein kinase C-binding protein NELL2 precursor        | R.YLELESSGHRNEVR.L                              | 4 | 2.20 | 0.12 | -3.20 |
| IPI00015285 | Ethanolamine-phosphate cytidyltransferase               | R.M*LLVTKAHHSSQEMSEYREYADSFQK.C                 | 3 | 2.42 | 0.05 | 0.94  |
| IPI00015315 | Extracellular matrix protein 2 precursor                | K.LYHVPSYLPK.S                                  | 3 | 3.04 | 0.26 | -3.18 |
| IPI00015315 | Extracellular matrix protein 2 precursor                | K.VNENNLQAIDEESLDLNLQVLTLEEGNNLSEANVNPLAFKPLK.S | 3 | 4.40 | 0.37 | -3.13 |
| IPI00015315 | Extracellular matrix protein 2 precursor                | K.VNENNLQAIDEESLDLNLQVLTLEEGNNLSEANVNPLAFKPLK.S | 4 | 6.39 | 0.57 | -5.44 |
| IPI00015315 | Extracellular matrix protein 2 precursor                | R.ELFLDHNDLK.S                                  | 1 | 2.81 | 0.27 | -1.10 |
| IPI00015315 | Extracellular matrix protein 2 precursor                | R.IAPLAWINQENLESIDLSYNK.L                       | 2 | 5.23 | 0.49 | -5.22 |
| IPI00015315 | Extracellular matrix protein 2 precursor                | R.IAPLAWINQENLESIDLSYNK.L                       | 3 | 6.38 | 0.48 | -5.11 |
| IPI00015315 | Extracellular matrix protein 2 precursor                | R.IPGYVFGHM*EPGLELYLSFNK.L                      | 3 | 5.07 | 0.47 | -4.51 |
| IPI00015315 | Extracellular matrix protein 2 precursor                | R.LPSGCSLSYR.T                                  | 2 | 2.62 | 0.35 | 0.52  |
| IPI00015315 | Extracellular matrix protein 2 precursor                | R.NILPEEICNAEEDDDSNLEHLHENNYIK.I                | 3 | 3.34 | 0.39 | -2.41 |
| IPI00015315 | Extracellular matrix protein 2 precursor                | R.NQQQLYSEGDSR.G                                | 2 | 4.09 | 0.41 | -2.74 |
| IPI00015315 | Extracellular matrix protein 2 precursor                | R.SYSSIVLKPQNIK.-                               | 2 | 4.64 | 0.45 | -3.16 |
| IPI00015315 | Extracellular matrix protein 2 precursor                | R.SYSSIVLKPQNIK.-                               | 3 | 1.80 | 0.24 | -1.45 |
| IPI00015315 | Extracellular matrix protein 2 precursor                | R.VSFYGAYHSLR.E                                 | 3 | 2.44 | 0.13 | -1.52 |
| IPI00015315 | Extracellular matrix protein 2 precursor                | R.YNKIEENR.I                                    | 2 | 2.86 | 0.21 | -0.39 |
| IPI00015346 | Cadherin EGF LAG seven-pass G-type receptor 2 precursor | A.LRGEQPPDLETTVILPESVFR.E                       | 2 | 4.34 | 0.53 | -0.57 |
| IPI00015346 | Cadherin EGF LAG seven-pass G-type receptor 2 precursor | A.LRGEQPPDLETTVILPESVFR.E                       | 3 | 4.11 | 0.24 | -3.93 |

|             |                                                         |                                         |   |      |      |       |
|-------------|---------------------------------------------------------|-----------------------------------------|---|------|------|-------|
| IPI00015346 | Cadherin EGF LAG seven-pass G-type receptor 2 precursor | L.RGEQPPDLETTVILPESVFR.E                | 2 | 3.33 | 0.35 | -2.00 |
| IPI00015346 | Cadherin EGF LAG seven-pass G-type receptor 2 precursor | R.DAGTELTGHLVPHHDGLR.V                  | 2 | 2.59 | 0.12 |       |
| IPI00015346 | Cadherin EGF LAG seven-pass G-type receptor 2 precursor | R.DAGTELTGHLVPHHDGLR.V                  | 3 | 3.07 | 0.28 | -0.50 |
| IPI00015346 | Cadherin EGF LAG seven-pass G-type receptor 2 precursor | R.ETPPVVRPAGPGEAQEPEE.L                 | 2 | 4.19 | 0.42 | -2.42 |
| IPI00015346 | Cadherin EGF LAG seven-pass G-type receptor 2 precursor | R.ETPPVVRPAGPGEAQEPEELAR.R              | 3 | 2.91 | 0.19 | -1.38 |
| IPI00015346 | Cadherin EGF LAG seven-pass G-type receptor 2 precursor | R.LLGIGGHLSPQGK.L                       | 2 | 3.49 | 0.43 | -3.76 |
| IPI00015346 | Cadherin EGF LAG seven-pass G-type receptor 2 precursor | R.SNQFFSLDPVTGAVTTAEELDRETK.S           | 3 | 3.73 | 0.29 | -5.34 |
| IPI00015346 | Cadherin EGF LAG seven-pass G-type receptor 2 precursor | R.VTAQDHGM*PR.R                         | 2 | 2.12 | 0.07 | -3.06 |
| IPI00015351 | Isoform 1 of UPF0424 protein C1orf128                   | K.FVESDADEELLFNIPFTGNVK.L               | 2 | 4.04 | 0.31 | -3.51 |
| IPI00015351 | Isoform 1 of UPF0424 protein C1orf128                   | K.FVESDADEELLFNIPFTGNVK.L               | 3 | 5.32 | 0.31 | -3.52 |
| IPI00015351 | Isoform 1 of UPF0424 protein C1orf128                   | K.NFGADTTK.V                            | 2 | 1.95 | 0.09 | -2.48 |
| IPI00015351 | Isoform 1 of UPF0424 protein C1orf128                   | K.VFYIGLR.G                             | 2 | 2.13 | 0.07 | -2.62 |
| IPI00015351 | Isoform 1 of UPF0424 protein C1orf128                   | R.DLTGELEYATK.I                         | 2 | 3.96 | 0.40 | -3.21 |
| IPI00015351 | Isoform 1 of UPF0424 protein C1orf128                   | R.GLAYGLYLR.I                           | 2 | 3.45 | 0.27 | -2.91 |
| IPI00015479 | UPF0454 protein C12orf49 precursor                      | R.AAVAFQNLFM*AVEDHFELCLAK.C             | 3 | 2.73 | 0.19 | -2.42 |
| IPI00015479 | UPF0454 protein C12orf49 precursor                      | R.TSSQSVQHENTYRDPIAK.Y                  | 2 | 3.17 | 0.42 | -3.11 |
| IPI00015479 | UPF0454 protein C12orf49 precursor                      | R.TSSQSVQHENTYRDPIAK.Y                  | 3 | 2.48 | 0.32 | -3.64 |
| IPI00015522 | Growth/differentiation factor 5 precursor               | K.GQLPGGKAPPKAGSVSSFLLKKAR.E            | 3 | 3.46 | 0.13 |       |
| IPI00015525 | Multimerin-2 precursor                                  | K.EAEPLVDIR.V                           | 1 | 1.87 | 0.16 | -2.77 |
| IPI00015525 | Multimerin-2 precursor                                  | K.EAEPLVDIR.V                           | 2 | 2.49 | 0.19 | -1.75 |
| IPI00015525 | Multimerin-2 precursor                                  | R.SLSGTAFGGFLM*FK.T                     | 2 | 3.93 | 0.41 | -4.44 |
| IPI00015525 | Multimerin-2 precursor                                  | R.SLSGTAFGGFLM*FKT.-                    | 2 | 2.61 | 0.24 | -5.19 |
| IPI00015525 | Multimerin-2 precursor                                  | R.TPVCTTGQSGSTATVFAM*AELQK.G            | 3 | 4.13 | 0.37 | -1.99 |
| IPI00015688 | Glypican-1 precursor                                    | K.GFSLSDVPQAEISGEHLR.I                  | 2 | 4.67 | 0.44 | -2.42 |
| IPI00015688 | Glypican-1 precursor                                    | K.GFSLSDVPQAEISGEHLR.I                  | 3 | 2.74 | 0.28 | -1.54 |
| IPI00015688 | Glypican-1 precursor                                    | K.M*ALSTASDDR.C                         | 2 | 3.32 | 0.36 | -1.75 |
| IPI00015688 | Glypican-1 precursor                                    | K.VNPQGGPPEEK.R                         | 2 | 2.35 | 0.13 | -2.25 |
| IPI00015688 | Glypican-1 precursor                                    | K.VNPQGGPPEEK.R                         | 2 | 2.41 | 0.21 | -3.90 |
| IPI00015688 | Glypican-1 precursor                                    | R.AFRDLYSEL.R                           | 2 | 2.44 | 0.10 | -3.44 |
| IPI00015688 | Glypican-1 precursor                                    | R.DVQDFWISLPGTLCSEK.M                   | 2 | 3.58 | 0.33 | -6.12 |
| IPI00015688 | Glypican-1 precursor                                    | R.GANLHLEETLAEFWAR.L                    | 3 | 4.13 | 0.17 | -4.38 |
| IPI00015688 | Glypican-1 precursor                                    | R.GRYLPEVM*GDGLAN.Q                     | 2 | 3.14 | 0.34 | -1.75 |
| IPI00015688 | Glypican-1 precursor                                    | R.GRYLPEVM*GDGLANQINNPEVEVDITKPDM*TIR.Q | 4 | 3.59 | 0.14 | -2.51 |
| IPI00015688 | Glypican-1 precursor                                    | R.SFVQGLGVASDVVR.K                      | 2 | 5.31 | 0.40 | -4.07 |



|             |                                                                         |                                |   |      |      |       |
|-------------|-------------------------------------------------------------------------|--------------------------------|---|------|------|-------|
| IPI00015688 | Glypican-1 precursor                                                    | R.SFVQGLGVASDVVRK.V            | 2 | 4.01 | 0.39 | -3.10 |
| IPI00015688 | Glypican-1 precursor                                                    | R.SHALETALR.D                  | 2 | 3.26 | 0.37 | -1.56 |
| IPI00015688 | Glypican-1 precursor                                                    | R.SHALETALRDSSR.V              | 2 | 3.35 | 0.40 | -3.06 |
| IPI00015688 | Glypican-1 precursor                                                    | R.TLQATFPGAFGELYTQNAR.A        | 2 | 6.04 | 0.56 | -4.40 |
| IPI00015688 | Glypican-1 precursor                                                    | R.TLQATFPGAFGELYTQNAR.A        | 3 | 4.92 | 0.44 | -4.64 |
| IPI00015688 | Glypican-1 precursor                                                    | R.TPLTHALPGLSEQEGQK.T          | 2 | 4.19 | 0.52 | -2.58 |
| IPI00015688 | Glypican-1 precursor                                                    | R.TPLTHALPGLSEQEGQK.T          | 3 | 3.79 | 0.22 | -1.98 |
| IPI00015688 | Glypican-1 precursor                                                    | R.VLQAM*LATQLR.S               | 2 | 3.67 | 0.41 | -2.61 |
| IPI00015756 | Isoform 1 of Receptor-type tyrosine-protein phosphatase kappa precursor | K.GAPISAYQIVVEELHPHRT.K        | 2 | 4.45 | 0.47 | -2.81 |
| IPI00015756 | Isoform 1 of Receptor-type tyrosine-protein phosphatase kappa precursor | K.GLNPGTLNILVR.V               | 2 | 2.60 | 0.28 | -0.59 |
| IPI00015756 | Isoform 1 of Receptor-type tyrosine-protein phosphatase kappa precursor | K.IFLNWKEPLDPNGIITQYEISYSSIR.S | 3 | 5.34 | 0.51 | -2.52 |
| IPI00015756 | Isoform 1 of Receptor-type tyrosine-protein phosphatase kappa precursor | K.TDQDLYR.C                    | 2 | 2.02 | 0.16 | -1.79 |
| IPI00015756 | Isoform 1 of Receptor-type tyrosine-protein phosphatase kappa precursor | R.GSGVSNFAQLIVR.E              | 2 | 3.67 | 0.24 | -3.50 |
| IPI00015756 | Isoform 1 of Receptor-type tyrosine-protein phosphatase kappa precursor | R.KESEETIIQTDEDVPGPVPVK.S      | 3 | 4.16 | 0.39 | -2.36 |
| IPI00015756 | Isoform 1 of Receptor-type tyrosine-protein phosphatase kappa precursor | R.LQEVTKTDQDLYR.C              | 3 | 3.49 | 0.30 | -1.33 |
| IPI00015756 | Isoform 1 of Receptor-type tyrosine-protein phosphatase kappa precursor | R.NGEDIPVAQTK.N                | 2 | 3.54 | 0.31 | -3.84 |
| IPI00015756 | Isoform 1 of Receptor-type tyrosine-protein phosphatase kappa precursor | R.VLLTRPGEGGTGLPGPPLITR.T      | 2 | 3.98 | 0.39 | -2.63 |
| IPI00015756 | Isoform 1 of Receptor-type tyrosine-protein phosphatase kappa precursor | R.VLLTRPGEGGTGLPGPPLITR.T      | 3 | 3.07 | 0.29 | -1.78 |
| IPI00015842 | Reticulocalbin-1 precursor                                              | K.IVDRIDNDGDGFVTTEELK.T        | 2 | 4.70 | 0.47 | -3.03 |
| IPI00015842 | Reticulocalbin-1 precursor                                              | K.IVDRIDNDGDGFVTTEELK.T        | 3 | 3.49 | 0.30 | -3.86 |
| IPI00015842 | Reticulocalbin-1 precursor                                              | K.TFDQLTPDESKER.L              | 3 | 2.09 | 0.11 | -0.37 |
| IPI00015842 | Reticulocalbin-1 precursor                                              | R.IDNDGDGFVTTEELK.T            | 2 | 2.74 | 0.36 | -3.20 |
| IPI00015881 | Isoform 1 of Macrophage colony-stimulating factor 1 precursor           | K.AFLLVQDIM*EDTM*R.F           | 2 | 4.58 | 0.52 | -2.66 |
| IPI00015881 | Isoform 1 of Macrophage colony-stimulating factor 1 precursor           | P.RFNSVPLTDTGHER.Q             | 2 | 3.63 | 0.29 | -4.21 |
| IPI00015881 | Isoform 1 of Macrophage colony-stimulating factor 1 precursor           | P.RFNSVPLTDTGHER.Q             | 3 | 3.51 | 0.29 | -2.76 |
| IPI00015881 | Isoform 1 of Macrophage colony-stimulating factor 1 precursor           | R.DNTPNAIAIVQLQELSLR.L         | 3 | 4.41 | 0.44 | -3.40 |
| IPI00015881 | Isoform 1 of Macrophage colony-stimulating factor 1 precursor           | R.DPPEPGSPR.I                  | 2 | 2.18 | 0.06 | -1.23 |

|             |                                                               |                            |   |      |      |       |
|-------------|---------------------------------------------------------------|----------------------------|---|------|------|-------|
| IPI00015881 | Isoform 1 of Macrophage colony-stimulating factor 1 precursor | R.FNSVPLTDTGHER.Q          | 2 | 3.88 | 0.39 | -3.79 |
| IPI00015881 | Isoform 1 of Macrophage colony-stimulating factor 1 precursor | R.FNSVPLTDTGHER.Q          | 3 | 2.09 | 0.23 | -1.32 |
| IPI00015881 | Isoform 1 of Macrophage colony-stimulating factor 1 precursor | R.FRDNTPNAIAIVQLQELSLR.L   | 2 | 5.49 | 0.51 | -5.09 |
| IPI00015881 | Isoform 1 of Macrophage colony-stimulating factor 1 precursor | R.FRDNTPNAIAIVQLQELSLR.L   | 3 | 4.57 | 0.33 | -2.01 |
| IPI00015881 | Isoform 1 of Macrophage colony-stimulating factor 1 precursor | R.ISSLRPQGLSNPSTLSAQPLSR.S | 3 | 5.28 | 0.47 | -2.55 |
| IPI00015881 | Isoform 1 of Macrophage colony-stimulating factor 1 precursor | R.QSEGSSPQLQESVFHLLVPSVI.L | 2 | 3.29 | 0.34 | -5.20 |
| IPI00015881 | Isoform 1 of Macrophage colony-stimulating factor 1 precursor | R.RSPAEPGGPASEGAARPLPR.F   | 3 | 4.14 | 0.29 | -3.50 |
| IPI00015881 | Isoform 1 of Macrophage colony-stimulating factor 1 precursor | R.SHSSGSVLPLGELEGR.R       | 2 | 4.58 | 0.51 | -4.05 |
| IPI00015881 | Isoform 1 of Macrophage colony-stimulating factor 1 precursor | R.SHSSGSVLPLGELEGR.R       | 3 | 3.17 | 0.30 | -3.65 |
| IPI00015881 | Isoform 1 of Macrophage colony-stimulating factor 1 precursor | R.SPAEPGGPASEGAARPLPR.F    | 2 | 3.48 | 0.24 | -2.28 |
| IPI00015881 | Isoform 1 of Macrophage colony-stimulating factor 1 precursor | R.SPAEPGGPASEGAARPLPR.F    | 3 | 2.47 | 0.29 | -1.62 |
| IPI00015881 | Isoform 1 of Macrophage colony-stimulating factor 1 precursor | R.TFYETPLQLEK.V            | 2 | 3.89 | 0.35 | -4.27 |
| IPI00015902 | Beta-type platelet-derived growth factor receptor precursor   | K.KGDVALPVPYDHQR.G         | 2 | 3.67 | 0.44 | -2.02 |
| IPI00015902 | Beta-type platelet-derived growth factor receptor precursor   | K.TTIGDREVDSDAYVYR.L       | 2 | 3.60 | 0.36 | -3.84 |
| IPI00015902 | Beta-type platelet-derived growth factor receptor precursor   | K.TTIGDREVDSDAYVYR.L       | 3 | 4.42 | 0.52 | -2.73 |
| IPI00015902 | Beta-type platelet-derived growth factor receptor precursor   | R.EVDSDAYVYR.L             | 2 | 3.59 | 0.43 | -3.62 |
| IPI00015902 | Beta-type platelet-derived growth factor receptor precursor   | R.GFSGIFEDR.S              | 1 | 2.02 | 0.18 | -3.24 |
| IPI00015902 | Beta-type platelet-derived growth factor receptor precursor   | R.GFSGIFEDR.S              | 2 | 3.03 | 0.30 | -2.28 |
| IPI00015902 | Beta-type platelet-derived growth factor receptor precursor   | R.LVEPVTDFLDM*PYHIR.S      | 3 | 2.33 | 0.17 | -2.11 |
| IPI00015902 | Beta-type platelet-derived growth factor receptor precursor   | R.M*SQEPPQEM*AK.A          | 2 | 3.33 | 0.34 | -2.27 |
| IPI00015902 | Beta-type platelet-derived growth factor receptor precursor   | R.TLGDSSAGEIALSTR.N        | 2 | 4.52 | 0.52 | -4.27 |

|             |                                                                 |                                         |   |      |      |       |
|-------------|-----------------------------------------------------------------|-----------------------------------------|---|------|------|-------|
| IPI00015902 | Beta-type platelet-derived growth factor receptor precursor     | R.VLELSESHPDSGEQTVR.C                   | 2 | 4.64 | 0.51 | -1.59 |
| IPI00015902 | Beta-type platelet-derived growth factor receptor precursor     | R.VLELSESHPDSGEQTVR.C                   | 3 | 2.56 | 0.08 | -1.21 |
| IPI00015902 | Beta-type platelet-derived growth factor receptor precursor     | R.VTDPQLVVTLHEK.K                       | 2 | 3.65 | 0.28 | -3.05 |
| IPI00015902 | Beta-type platelet-derived growth factor receptor precursor     | R.VTDPQLVVTLHEK.K                       | 3 | 2.14 | 0.19 | -1.48 |
| IPI00015911 | Dihydrolipoyl dehydrogenase, mitochondrial precursor            | K.ADGGTQVIDTK.N                         | 2 | 3.46 | 0.32 | -2.87 |
| IPI00015911 | Dihydrolipoyl dehydrogenase, mitochondrial precursor            | K.ALTGGIAHLFK.Q                         | 2 | 3.37 | 0.44 | -3.33 |
| IPI00015911 | Dihydrolipoyl dehydrogenase, mitochondrial precursor            | K.IPNIYAIGDVVAGPM*LAHK.A                | 3 | 4.22 | 0.35 | -2.14 |
| IPI00015911 | Dihydrolipoyl dehydrogenase, mitochondrial precursor            | K.TNADTDGM*VK.I                         | 2 | 1.98 | 0.08 | -2.57 |
| IPI00015911 | Dihydrolipoyl dehydrogenase, mitochondrial precursor            | R.VLGAHILGPGAGEM*VNEAALALEYGASCEDIAR.V  | 3 | 4.25 | 0.41 | -1.43 |
| IPI00015911 | Dihydrolipoyl dehydrogenase, mitochondrial precursor            | Y.ADQPIDADVTVIGSGPGGYVAAIK.A            | 2 | 5.04 | 0.54 | -3.57 |
| IPI00015911 | Dihydrolipoyl dehydrogenase, mitochondrial precursor            | Y.ADQPIDADVTVIGSGPGGYVAAIK.A            | 3 | 5.47 | 0.43 | -4.50 |
| IPI00015913 | 5,6-dihydroxyindole-2-carboxylic acid oxidase precursor         | R.NTVEGYSDPTGK.Y                        | 2 | 2.62 | 0.16 | -2.77 |
| IPI00015954 | GTP-binding protein SAR1a                                       | R.LGQHVP TLHPTSEELTIAGMTFTTDFLGGHEQAR.R | 4 | 3.81 | 0.18 | -2.35 |
| IPI00015964 | Neuromodulin                                                    | G.EGDAATEQAAPQAPASSEEK.A                | 2 | 4.26 | 0.54 | -2.91 |
| IPI00015964 | Neuromodulin                                                    | K.ASTDNSPSSKAEDAPAKEEPK.Q               | 3 | 3.54 | 0.32 | -3.11 |
| IPI00015964 | Neuromodulin                                                    | K.ATAQPPTETGESSQAEENIEAVDETKPK.E        | 3 | 2.70 | 0.41 | -3.39 |
| IPI00015964 | Neuromodulin                                                    | K.GEGDAATEQAAPQAPASSEEK.A               | 2 | 5.71 | 0.58 | -4.28 |
| IPI00015964 | Neuromodulin                                                    | K.GEGDAATEQAAPQAPASSEEK.A               | 3 | 3.58 | 0.24 | -3.28 |
| IPI00015964 | Neuromodulin                                                    | K.GEGTTTAEAAPATGSKPDEPGK.A              | 3 | 4.47 | 0.46 | -3.80 |
| IPI00015964 | Neuromodulin                                                    | K.KEGDAATEQAAPQAPASSEEK.A               | 3 | 3.59 | 0.29 | -2.60 |
| IPI00015964 | Neuromodulin                                                    | K.KGEGTTTAEAAPATGSKPDEPGK.A             | 3 | 5.35 | 0.49 | -2.75 |
| IPI00015964 | Neuromodulin                                                    | K.KGEGTTTAEAAPATGSKPDEPGKAGETPSEEK.K    | 4 | 4.91 | 0.42 | -3.61 |
| IPI00015964 | Neuromodulin                                                    | K.QADVPAAVTAAAATTPAAEDAAAK.A            | 2 | 6.05 | 0.65 | -0.39 |
| IPI00015964 | Neuromodulin                                                    | K.QADVPAAVTAAAATTPAAEDAAAK.A            | 3 | 3.57 | 0.27 | -3.47 |
| IPI00015964 | Neuromodulin                                                    | T.AAAATTPAAEDAAAK.A                     | 2 | 3.65 | 0.38 | -4.78 |
| IPI00015973 | Band 4.1-like protein 2                                         | K.DSSQLGTDATK.E                         | 2 | 2.94 | 0.29 | -3.14 |
| IPI00015980 | Isoform 2 of Multiple PDZ domain protein                        | R.GPDGLGFSIVGGYGSPhGDLPIYVKTVFAK.G      | 3 | 3.67 | 0.05 |       |
| IPI00015983 | Sphingosine 1-phosphate receptor Edg-3                          | R.GRGARASPIQPALDPSRSK.S                 | 3 | 2.63 | 0.10 | -0.55 |
| IPI00015988 | HLA class I histocompatibility antigen, alpha chain G precursor | K.WAAVVVPSGEEQR.Y                       | 2 | 3.88 | 0.35 | -3.20 |

|             |                                                        |                                          |   |      |      |       |
|-------------|--------------------------------------------------------|------------------------------------------|---|------|------|-------|
| IPI00016014 | Isoform 1 of Integral membrane protein 2C              | K.ISFQPAVAGIK.G                          | 2 | 2.57 | 0.21 | -2.49 |
| IPI00016014 | Isoform 1 of Integral membrane protein 2C              | M.VKISFQPAVAGIK.G                        | 2 | 3.59 | 0.19 | -1.24 |
| IPI00016112 | peroxidasin homolog                                    | K.KLESRLSTTECVDAGGESHANNTKWK.K           | 3 | 3.07 | 0.10 | -6.49 |
| IPI00016150 | Neuroserpin precursor                                  | A.TFP EEAIADLSVNM*YNR.L                  | 2 | 5.16 | 0.53 | -3.20 |
| IPI00016150 | Neuroserpin precursor                                  | A.TFP EEAIADLSVNM*YNR.L                  | 3 | 3.74 | 0.42 | -2.62 |
| IPI00016150 | Neuroserpin precursor                                  | G.ATFP EEAIADLSVNM*YNR.L                 | 2 | 4.35 | 0.34 | -2.88 |
| IPI00016150 | Neuroserpin precursor                                  | G.ATFP EEAIADLSVNM*YNR.L                 | 3 | 5.03 | 0.33 | -4.64 |
| IPI00016150 | Neuroserpin precursor                                  | K.ALGITEIFIK.D                           | 2 | 3.38 | 0.36 | -2.75 |
| IPI00016150 | Neuroserpin precursor                                  | K.ALGITEIFIKDANLTGLSDNKEIFLSK.A          | 3 | 3.21 | 0.07 | -2.23 |
| IPI00016150 | Neuroserpin precursor                                  | K.AQLVEEWANSVK.K                         | 2 | 4.10 | 0.42 | -1.34 |
| IPI00016150 | Neuroserpin precursor                                  | K.AQLVEEWANSVK.K                         | 2 | 3.79 | 0.34 | -0.69 |
| IPI00016150 | Neuroserpin precursor                                  | K.DANLTGLSDNKEIFLSK.A                    | 3 | 3.61 | 0.39 | -2.09 |
| IPI00016150 | Neuroserpin precursor                                  | K.EFSNM*VTAK.E                           | 1 | 1.79 | 0.11 | -2.70 |
| IPI00016150 | Neuroserpin precursor                                  | K.EFSNM*VTAK.E                           | 2 | 2.12 | 0.31 | -2.24 |
| IPI00016150 | Neuroserpin precursor                                  | K.ESQYVM*K.I                             | 1 | 2.30 | 0.11 | -1.89 |
| IPI00016150 | Neuroserpin precursor                                  | K.IANSLFVQNGFHVNEEFLQM*M*K.K             | 3 | 4.40 | 0.47 | -3.41 |
| IPI00016150 | Neuroserpin precursor                                  | K.KYFNAAVNHVDFSQNVAVANYINK.W             | 4 | 3.03 | 0.06 | -4.67 |
| IPI00016150 | Neuroserpin precursor                                  | K.NGEEFSFLK.E                            | 1 | 2.28 | 0.16 | -2.99 |
| IPI00016150 | Neuroserpin precursor                                  | K.NGEEFSFLK.E                            | 2 | 2.93 | 0.25 | -1.80 |
| IPI00016150 | Neuroserpin precursor                                  | K.NGEEFSFLKEFSNM*VTAK.E                  | 2 | 3.51 | 0.37 | -2.45 |
| IPI00016150 | Neuroserpin precursor                                  | K.NGEEFSFLKEFSNM*VTAK.E                  | 3 | 3.62 | 0.33 | -3.17 |
| IPI00016150 | Neuroserpin precursor                                  | K.QKVEVYLPR.F                            | 2 | 1.90 | 0.35 | 0.64  |
| IPI00016150 | Neuroserpin precursor                                  | K.SQFRPENTR.T                            | 2 | 1.59 | 0.10 | -2.59 |
| IPI00016150 | Neuroserpin precursor                                  | K.VEVYLPR.F                              | 1 | 1.72 | 0.19 | -1.98 |
| IPI00016150 | Neuroserpin precursor                                  | R.ATGEDENILFSPSIALAM*GM*M*ELGAQGSTQK.E   | 3 | 5.35 | 0.42 | -2.79 |
| IPI00016150 | Neuroserpin precursor                                  | R.DFDAATYLALINAVYFK.G                    | 2 | 4.57 | 0.44 | -8.09 |
| IPI00016150 | Neuroserpin precursor                                  | R.DFDAATYLALINAVYFK.G                    | 3 | 4.88 | 0.40 | -2.29 |
| IPI00016150 | Neuroserpin precursor                                  | R.FTVEQEIDLKDVVK.A                       | 2 | 4.77 | 0.40 | -5.43 |
| IPI00016150 | Neuroserpin precursor                                  | R.FTVEQEIDLKDVVK.A                       | 3 | 3.39 | 0.37 | -3.26 |
| IPI00016150 | Neuroserpin precursor                                  | R.HSM*GYDSLK.N                           | 2 | 2.11 | 0.19 | -1.32 |
| IPI00016150 | Neuroserpin precursor                                  | R.HSM*GYDSLKNGEEFSFLK.E                  | 3 | 3.29 | 0.23 | -1.73 |
| IPI00016150 | Neuroserpin precursor                                  | R.HSM*GYDSLKNGEEFSFLKEFSNM*VTAK.E        | 3 | 2.83 | 0.12 | -3.41 |
| IPI00016150 | Neuroserpin precursor                                  | R.HSM*GYDSLKNGEEFSFLKEFSNM*VTAK.E        | 4 | 2.63 | 0.16 | -3.20 |
| IPI00016150 | Neuroserpin precursor                                  | R.HSM*GYDSLKNGEEFSFLKEFSNM*VTAK.E        | 5 | 3.80 | 0.31 | -4.24 |
| IPI00016150 | Neuroserpin precursor                                  | R.LRATGEDENILFSPSIALAM*GM*M*ELGAQGSTQK.E | 3 | 7.30 | 0.61 | -3.65 |
| IPI00016150 | Neuroserpin precursor                                  | R.QEVLATLEPLVK.A                         | 2 | 3.02 | 0.34 | -2.27 |
| IPI00016150 | Neuroserpin precursor                                  | R.TGTILFM*GR.V                           | 2 | 2.90 | 0.30 | -1.78 |
| IPI00016150 | Neuroserpin precursor                                  | R.VM*HPETM*NTSGHDFEEL.-                  | 2 | 3.77 | 0.60 | -2.11 |
| IPI00016334 | Isoform 1 of Cell surface glycoprotein MUC18 precursor | G.VPGAEQPAPELVEVEVGSTALLK.C              | 2 | 4.80 | 0.52 | -3.95 |
| IPI00016334 | Isoform 1 of Cell surface glycoprotein MUC18 precursor | G.VPGAEQPAPELVEVEVGSTALLK.C              | 3 | 5.22 | 0.33 | -6.16 |

|             |                                                        |                                    |   |      |      |       |
|-------------|--------------------------------------------------------|------------------------------------|---|------|------|-------|
| IPI00016334 | Isoform 1 of Cell surface glycoprotein MUC18 precursor | K.APEEPNIQVNPLGIPVNSKEPEEVATCVGR.N | 3 | 6.07 | 0.47 | -3.53 |
| IPI00016334 | Isoform 1 of Cell surface glycoprotein MUC18 precursor | K.AQLVKEDKDAQFYCELNYR.L            | 2 | 5.95 | 0.58 | -3.81 |
| IPI00016334 | Isoform 1 of Cell surface glycoprotein MUC18 precursor | K.AQLVKEDKDAQFYCELNYR.L            | 3 | 5.60 | 0.47 | -3.16 |
| IPI00016334 | Isoform 1 of Cell surface glycoprotein MUC18 precursor | K.AQLVKEDKDAQFYCELNYR.L            | 4 | 3.66 | 0.32 | -1.51 |
| IPI00016334 | Isoform 1 of Cell surface glycoprotein MUC18 precursor | K.DAQFYCELNYR.L                    | 2 | 3.09 | 0.27 | -2.37 |
| IPI00016334 | Isoform 1 of Cell surface glycoprotein MUC18 precursor | K.EDKDAQFYCELNYR.L                 | 2 | 3.75 | 0.51 | -4.18 |
| IPI00016334 | Isoform 1 of Cell surface glycoprotein MUC18 precursor | K.EDKDAQFYCELNYR.L                 | 3 | 4.32 | 0.34 | -3.16 |
| IPI00016334 | Isoform 1 of Cell surface glycoprotein MUC18 precursor | K.EGDRVEIR.C                       | 1 | 1.31 | 0.12 | -4.10 |
| IPI00016334 | Isoform 1 of Cell surface glycoprotein MUC18 precursor | K.EPEEVATCVGR.N                    | 2 | 2.52 | 0.37 | -3.38 |
| IPI00016334 | Isoform 1 of Cell surface glycoprotein MUC18 precursor | K.VWLEVEPVMG*LK.E                  | 2 | 4.19 | 0.30 | -4.45 |
| IPI00016334 | Isoform 1 of Cell surface glycoprotein MUC18 precursor | P.GEAEQPAPELVEVEVGSTALLK.C         | 2 | 5.12 | 0.59 | -4.29 |
| IPI00016334 | Isoform 1 of Cell surface glycoprotein MUC18 precursor | P.GEAEQPAPELVEVEVGSTALLK.C         | 3 | 4.96 | 0.44 | -4.83 |
| IPI00016334 | Isoform 1 of Cell surface glycoprotein MUC18 precursor | R.EAEEETTNDNGVLVLEPAR.K            | 2 | 4.77 | 0.40 | -3.65 |
| IPI00016334 | Isoform 1 of Cell surface glycoprotein MUC18 precursor | R.EAEEETTNDNGVLVLEPAR.K            | 3 | 3.75 | 0.17 | -3.63 |
| IPI00016334 | Isoform 1 of Cell surface glycoprotein MUC18 precursor | R.EAEEETTNDNGVLVLEPARK.E           | 2 | 4.24 | 0.39 | -3.12 |
| IPI00016334 | Isoform 1 of Cell surface glycoprotein MUC18 precursor | R.EAEEETTNDNGVLVLEPARK.E           | 3 | 3.42 | 0.43 | -1.14 |
| IPI00016334 | Isoform 1 of Cell surface glycoprotein MUC18 precursor | R.EETGQVLER.G                      | 1 | 2.12 | 0.14 | -3.25 |
| IPI00016334 | Isoform 1 of Cell surface glycoprotein MUC18 precursor | R.EETGQVLER.G                      | 2 | 2.38 | 0.13 | -2.56 |
| IPI00016334 | Isoform 1 of Cell surface glycoprotein MUC18 precursor | R.EETGQVLERGPVLQLHDLKR.E           | 3 | 3.09 | 0.23 | -0.84 |
| IPI00016334 | Isoform 1 of Cell surface glycoprotein MUC18 precursor | R.EVTVPVFYPTEK.V                   | 1 | 2.36 | 0.28 | -3.13 |
| IPI00016334 | Isoform 1 of Cell surface glycoprotein MUC18 precursor | R.EVTVPVFYPTEK.V                   | 2 | 3.29 | 0.38 | -4.62 |

|             |                                                                   |                                               |   |      |      |       |
|-------------|-------------------------------------------------------------------|-----------------------------------------------|---|------|------|-------|
| IPI00016334 | Isoform 1 of Cell surface glycoprotein MUC18 precursor            | R.GATLALTQVTPQDER.I                           | 2 | 4.67 | 0.43 | -3.78 |
| IPI00016334 | Isoform 1 of Cell surface glycoprotein MUC18 precursor            | R.GATLALTQVTPQDER.I                           | 3 | 3.02 | 0.18 | -2.21 |
| IPI00016334 | Isoform 1 of Cell surface glycoprotein MUC18 precursor            | R.GPVLQLHDLK.R                                | 2 | 3.09 | 0.22 | -2.17 |
| IPI00016334 | Isoform 1 of Cell surface glycoprotein MUC18 precursor            | R.GPVLQLHDLK.R.E                              | 2 | 3.67 | 0.40 | -4.02 |
| IPI00016334 | Isoform 1 of Cell surface glycoprotein MUC18 precursor            | R.IFLCQGK.R                                   | 1 | 1.89 | 0.11 | -2.11 |
| IPI00016334 | Isoform 1 of Cell surface glycoprotein MUC18 precursor            | R.IFLCQGK.R                                   | 2 | 1.93 | 0.13 | -1.83 |
| IPI00016334 | Isoform 1 of Cell surface glycoprotein MUC18 precursor            | R.LSLQDRGATLALTQVTPQDER.I                     | 3 | 4.32 | 0.22 | -1.77 |
| IPI00016334 | Isoform 1 of Cell surface glycoprotein MUC18 precursor            | R.QEGSSLTLTCEAESSQDLEFQWLREETGQVLER.G         | 3 | 4.89 | 0.54 | -2.86 |
| IPI00016334 | Isoform 1 of Cell surface glycoprotein MUC18 precursor            | R.QGQGQSEPGEYEQR.L                            | 2 | 3.89 | 0.45 | -3.73 |
| IPI00016334 | Isoform 1 of Cell surface glycoprotein MUC18 precursor            | R.QGQGQSEPGEYEQR.L                            | 3 | 2.79 | 0.20 | -2.15 |
| IPI00016334 | Isoform 1 of Cell surface glycoprotein MUC18 precursor            | R.TQLVNVAIFGPPWM*AFK.E                        | 2 | 6.03 | 0.51 | -4.04 |
| IPI00016334 | Isoform 1 of Cell surface glycoprotein MUC18 precursor            | R.TQLVNVAIFGPPWM*AFK.E                        | 3 | 3.91 | 0.27 | -2.99 |
| IPI00016334 | Isoform 1 of Cell surface glycoprotein MUC18 precursor            | R.VHIQSSQTVESGLYTLQSILK.A                     | 2 | 6.91 | 0.63 | -4.86 |
| IPI00016334 | Isoform 1 of Cell surface glycoprotein MUC18 precursor            | R.VHIQSSQTVESGLYTLQSILK.A                     | 3 | 5.49 | 0.49 | -6.82 |
| IPI00016334 | Isoform 1 of Cell surface glycoprotein MUC18 precursor            | R.VLSTLNVLVTPELLETVECTASNDLGK.N               | 3 | 3.30 | 0.25 | -1.67 |
| IPI00016334 | Isoform 1 of Cell surface glycoprotein MUC18 precursor            | R.VRQGQGQSEPGEYEQR.L                          | 2 | 5.07 | 0.48 | -4.27 |
| IPI00016334 | Isoform 1 of Cell surface glycoprotein MUC18 precursor            | R.VRQGQGQSEPGEYEQR.L                          | 3 | 4.51 | 0.43 | -3.67 |
| IPI00016334 | Isoform 1 of Cell surface glycoprotein MUC18 precursor            | R.VSPAAPERQEGSSLTLTCEAESSQDLEFQWLREETGQVLER.G | 4 | 4.98 | 0.43 | 0.69  |
| IPI00016334 | Isoform 1 of Cell surface glycoprotein MUC18 precursor            | R.VYKAPEEPNIQVNPLGIPVNSK.E                    | 3 | 4.74 | 0.41 | -3.07 |
| IPI00016334 | Isoform 1 of Cell surface glycoprotein MUC18 precursor            | R.VYKAPEEPNIQVNPLGIPVNSKEPEEV.A               | 3 | 5.49 | 0.46 | -2.01 |
| IPI00016371 | Isoform JM-A of Receptor tyrosine-protein kinase erbB-4 precursor | K.M*EVEENGIK.M                                | 2 | 2.17 | 0.09 | -2.59 |

|             |                                                                       |                                  |   |      |      |       |
|-------------|-----------------------------------------------------------------------|----------------------------------|---|------|------|-------|
| IPI00016371 | Isoform JM-A of Receptor tyrosine-protein kinase erbB-4 precursor     | R.EVTGYVLVALNQFR.Y               | 2 | 3.17 | 0.27 | -3.43 |
| IPI00016422 | Netrin receptor DCC precursor                                         | K.AFNNAGEGVPLYESATTR.S           | 2 | 5.44 | 0.52 | -3.86 |
| IPI00016422 | Netrin receptor DCC precursor                                         | K.DGIHLALGM*DER.K                | 2 | 3.11 | 0.34 | -3.32 |
| IPI00016422 | Netrin receptor DCC precursor                                         | K.DGIHLALGM*DER.K                | 3 | 3.70 | 0.29 | -2.64 |
| IPI00016422 | Netrin receptor DCC precursor                                         | K.FTEYSLR.F                      | 2 | 1.86 | 0.09 | 0.73  |
| IPI00016422 | Netrin receptor DCC precursor                                         | K.GNIQTFTVFFSR.E                 | 2 | 3.70 | 0.39 | -2.51 |
| IPI00016422 | Netrin receptor DCC precursor                                         | K.GVGPLSDPILFR.T                 | 2 | 2.33 | 0.33 | -3.68 |
| IPI00016422 | Netrin receptor DCC precursor                                         | K.KFTEYSLR.F                     | 2 | 2.44 | 0.06 | -2.70 |
| IPI00016422 | Netrin receptor DCC precursor                                         | K.NGDVVIPSDYFQIVGGSNL.R.I        | 2 | 4.85 | 0.51 | -2.64 |
| IPI00016422 | Netrin receptor DCC precursor                                         | K.NGDVVIPSDYFQIVGGSNL.R.I        | 3 | 4.17 | 0.42 | -3.00 |
| IPI00016422 | Netrin receptor DCC precursor                                         | K.VSWLPPPSGTQNGFITGYK.I          | 2 | 3.03 | 0.34 | -3.95 |
| IPI00016422 | Netrin receptor DCC precursor                                         | R.DVVPVLVSSR.F                   | 1 | 2.08 | 0.21 | -2.84 |
| IPI00016422 | Netrin receptor DCC precursor                                         | R.DVVPVLVSSR.F                   | 2 | 2.21 | 0.16 | -2.66 |
| IPI00016422 | Netrin receptor DCC precursor                                         | R.FLSEPSDAVTM*R.G                | 2 | 3.20 | 0.41 | -3.30 |
| IPI00016422 | Netrin receptor DCC precursor                                         | R.FLSQTESVTAFM*GDTVLLK.C         | 2 | 5.03 | 0.48 | -2.44 |
| IPI00016422 | Netrin receptor DCC precursor                                         | R.FLSQTESVTAFM*GDTVLLK.C         | 3 | 2.88 | 0.16 | -2.59 |
| IPI00016422 | Netrin receptor DCC precursor                                         | R.GGNVLLDCSAESDRGVPIK.W          | 3 | 3.79 | 0.27 | -2.66 |
| IPI00016422 | Netrin receptor DCC precursor                                         | R.GYIIGYGVGSPYAETVR.V            | 2 | 5.43 | 0.52 | -4.15 |
| IPI00016422 | Netrin receptor DCC precursor                                         | R.ILSDPGLHR.Q                    | 2 | 2.60 | 0.15 | -3.05 |
| IPI00016422 | Netrin receptor DCC precursor                                         | R.QLYFLQRPSNVVAIEGK.D            | 2 | 4.24 | 0.37 | -3.67 |
| IPI00016422 | Netrin receptor DCC precursor                                         | R.QLYFLQRPSNVVAIEGK.D            | 3 | 2.91 | 0.36 | -2.66 |
| IPI00016422 | Netrin receptor DCC precursor                                         | R.RGEM*ETLEPNNLWYLFRTGLEK.G      | 3 | 4.17 | 0.33 | -2.20 |
| IPI00016422 | Netrin receptor DCC precursor                                         | R.VVLPSPGALQISR.L                | 2 | 3.08 | 0.38 | -2.02 |
| IPI00016422 | Netrin receptor DCC precursor                                         | V.VVLPSPGALQISR.LQPGDIGIYR.C     | 2 | 2.94 | 0.17 | 1.56  |
| IPI00016467 | SLIT and NTRK-like protein 3 precursor                                | K.AVSLTHLDR.G                    | 2 | 2.42 | 0.22 | -2.68 |
| IPI00016467 | SLIT and NTRK-like protein 3 precursor                                | K.KLYLSSNLIQK.I                  | 2 | 2.72 | 0.11 | -2.56 |
| IPI00016467 | SLIT and NTRK-like protein 3 precursor                                | K.LLFLNLLR.T                     | 2 | 2.74 | 0.20 | -2.38 |
| IPI00016467 | SLIT and NTRK-like protein 3 precursor                                | R.GM*LDHIGR.S                    | 2 | 1.90 | 0.24 | -2.19 |
| IPI00016467 | SLIT and NTRK-like protein 3 precursor                                | R.VLILNDNLIPM*LPTNLFK.A          | 2 | 4.50 | 0.47 | -3.34 |
| IPI00016467 | SLIT and NTRK-like protein 3 precursor                                | R.VLILNDNLIPM*LPTNLFK.A          | 3 | 3.32 | 0.22 | -4.09 |
| IPI00016576 | Isoform 1 of Grainyhead-like protein 2 homolog                        | K.AEDFTPVMAPPVHYPRGDGEEQR.V      | 3 | 2.30 | 0.06 | 1.13  |
| IPI00016577 | CDNA: FLJ22814 fis, clone KAIA3004                                    | K.CWLQGTSSPCHSPCYPLGNLK.G        | 2 | 1.75 | 0.06 | -6.76 |
| IPI00016605 | Uncharacterized protein C1orf123                                      | K.ATLENITNLRPVGEDFR.W            | 3 | 2.64 | 0.22 | -1.59 |
| IPI00016621 | Adaptor-related protein complex 2, alpha 2 subunit variant (Fragment) | K.IIGFGSALLEEVDPNPANFVAGAGIHTK.T | 3 | 4.84 | 0.50 | -3.31 |
| IPI00016621 | Adaptor-related protein complex 2, alpha 2 subunit variant (Fragment) | K.QLSNPQQEVQNIKF.A               | 2 | 3.47 | 0.36 | -4.43 |
| IPI00016621 | Adaptor-related protein complex 2, alpha 2 subunit variant (Fragment) | R.YGGTFQNVSVQLPITLNK.F           | 2 | 4.78 | 0.40 | -3.81 |
| IPI00016645 | Isoform 1 of Ephrin type-A receptor 7 precursor                       | K.IDTIAADESFTQGDGDLGER.K         | 2 | 5.91 | 0.62 | -4.77 |
| IPI00016645 | Isoform 1 of Ephrin type-A receptor 7 precursor                       | K.IDTIAADESFTQGDGDLGER.K         | 3 | 4.34 | 0.46 | -4.05 |

|             |                                                                         |                                   |   |      |      |       |
|-------------|-------------------------------------------------------------------------|-----------------------------------|---|------|------|-------|
| IPI00016645 | Isoform 1 of Ephrin type-A receptor 7 precursor                         | R.AFTAAGYGNYSR.L                  | 2 | 3.32 | 0.45 | -2.95 |
| IPI00016645 | Isoform 1 of Ephrin type-A receptor 7 precursor                         | R.EIGPLSK.K                       | 1 | 1.40 | 0.12 | -2.36 |
| IPI00016645 | Isoform 1 of Ephrin type-A receptor 7 precursor                         | R.LDVATLEEATGK.M                  | 2 | 4.08 | 0.43 | -2.03 |
| IPI00016645 | Isoform 1 of Ephrin type-A receptor 7 precursor                         | R.SVELSWQEPEHPNGVITEYEIK.Y        | 3 | 3.22 | 0.17 | -3.38 |
| IPI00016645 | Isoform 1 of Ephrin type-A receptor 7 precursor                         | V.KIDTIAADESFTQGDLGER.K           | 2 | 6.39 | 0.61 | -1.98 |
| IPI00016645 | Isoform 1 of Ephrin type-A receptor 7 precursor                         | V.KIDTIAADESFTQGDLGER.K           | 3 | 4.38 | 0.36 | -1.48 |
| IPI00016666 | Metallothionein-3                                                       | D.PETPCPSGGSCCADSCK.C             | 2 | 4.84 | 0.71 | -4.07 |
| IPI00016666 | Metallothionein-3                                                       | E.TCPCPSGGSCCADSCK.C              | 2 | 3.24 | 0.55 | -2.13 |
| IPI00016666 | Metallothionein-3                                                       | K.SCCSCCPAECEK.C                  | 2 | 4.04 | 0.50 | -3.56 |
| IPI00016679 | SLIT and NTRK-like protein 5 precursor                                  | K.FAETDM*R.S                      | 2 | 1.92 | 0.16 | -2.91 |
| IPI00016679 | SLIT and NTRK-like protein 5 precursor                                  | R.DLDEVSKQELCPR.R                 | 2 | 3.24 | 0.24 | -1.52 |
| IPI00016679 | SLIT and NTRK-like protein 5 precursor                                  | R.FVPLTHLDLR.G                    | 2 | 2.17 | 0.11 | -3.84 |
| IPI00016679 | SLIT and NTRK-like protein 5 precursor                                  | R.GIISLSEISPPR.F                  | 2 | 2.44 | 0.17 | -1.60 |
| IPI00016679 | SLIT and NTRK-like protein 5 precursor                                  | R.KIESIAELQPKYPNP.K               | 3 | 2.63 | 0.30 | -3.37 |
| IPI00016679 | SLIT and NTRK-like protein 5 precursor                                  | R.RTDFLEATGLDLLHLGNRR.I           | 3 | 5.22 | 0.48 | -4.48 |
| IPI00016679 | SLIT and NTRK-like protein 5 precursor                                  | R.TDFLEATGLDLLHLGNRR.I            | 2 | 3.55 | 0.49 | -3.34 |
| IPI00016679 | SLIT and NTRK-like protein 5 precursor                                  | R.TDFLEATGLDLLHLGNRR.I            | 3 | 4.57 | 0.46 | -2.88 |
| IPI00016685 | Enamelin precursor                                                      | R.GDSRKVPNSDGQTQSQNLPK.G          | 2 | 1.59 | 0.20 |       |
| IPI00016701 | P2Y purinoceptor 14                                                     | K.ASNYIFVAIFWIVFLLLVFYTAITK.K     | 3 | 3.33 | 0.10 |       |
| IPI00016862 | Isoform Mitochondrial of Glutathione reductase, mitochondrial precursor | K.ADFDNTVAIHPTSSEELVTLR.-         | 3 | 4.94 | 0.46 | -4.69 |
| IPI00016862 | Isoform Mitochondrial of Glutathione reductase, mitochondrial precursor | K.LGGTCVNVGCVPK.K                 | 2 | 3.08 | 0.23 | 2.70  |
| IPI00016862 | Isoform Mitochondrial of Glutathione reductase, mitochondrial precursor | R.GHAAFTSDPKPTIEVSGK.K            | 2 | 4.69 | 0.57 | -3.49 |
| IPI00016862 | Isoform Mitochondrial of Glutathione reductase, mitochondrial precursor | R.GHAAFTSDPKPTIEVSGK.K            | 3 | 2.98 | 0.29 | -2.12 |
| IPI00016862 | Isoform Mitochondrial of Glutathione reductase, mitochondrial precursor | R.LNAIYQNNLTK.S                   | 2 | 3.64 | 0.33 | -2.02 |
| IPI00016862 | Isoform Mitochondrial of Glutathione reductase, mitochondrial precursor | R.RAAELGAR.A                      | 2 | 2.65 | 0.09 | -5.09 |
| IPI00016870 | Zona pellucida sperm-binding protein 2 precursor                        | A.TGATEAEKM*TVSLPGPILLSSDDSSFR.G  | 3 | 3.97 | 0.30 | -7.72 |
| IPI00016870 | Zona pellucida sperm-binding protein 2 precursor                        | K.DFM*SFSLPR.V                    | 2 | 2.84 | 0.25 | -2.33 |
| IPI00016870 | Zona pellucida sperm-binding protein 2 precursor                        | K.LTFISPGQK.V                     | 2 | 1.83 | 0.06 | -0.98 |
| IPI00016870 | Zona pellucida sperm-binding protein 2 precursor                        | K.M*TVSLPGPILLSSDDSSFR.G          | 2 | 4.96 | 0.53 | -2.29 |
| IPI00016870 | Zona pellucida sperm-binding protein 2 precursor                        | K.M*TVSLPGPILLSSDDSSFR.G          | 3 | 4.43 | 0.33 | -4.08 |
| IPI00016870 | Zona pellucida sperm-binding protein 2 precursor                        | K.TLTLPEAM*K.E                    | 1 | 2.01 | 0.08 |       |
| IPI00016870 | Zona pellucida sperm-binding protein 2 precursor                        | R.ATGATEAEKM*TVSLPGPILLSSDDSSFR.G | 3 | 6.38 | 0.49 | -3.16 |
| IPI00016870 | Zona pellucida sperm-binding protein 2 precursor                        | R.GVGSSDLK.A                      | 1 | 1.53 | 0.13 | -3.97 |
| IPI00016870 | Zona pellucida sperm-binding protein 2 precursor                        | T.VSLPGPILLSSDDSSFR.G             | 2 | 4.02 | 0.52 | -4.71 |
| IPI00016915 | Insulin-like growth factor-binding protein 7 precursor                  | E.LLPGDRDNLAIQTR.G                | 2 | 3.19 | 0.19 | -2.40 |



|             |                                                        |                            |   |      |      |       |
|-------------|--------------------------------------------------------|----------------------------|---|------|------|-------|
| IPI00016915 | Insulin-like growth factor-binding protein 7 precursor | K.AGAAAGGPGVSGVCVK.S       | 2 | 4.90 | 0.54 | -3.24 |
| IPI00016915 | Insulin-like growth factor-binding protein 7 precursor | K.EDAGEYECHASNSQQQASASAK.I | 2 | 5.34 | 0.55 | -4.02 |
| IPI00016915 | Insulin-like growth factor-binding protein 7 precursor | K.EDAGEYECHASNSQQQASASAK.I | 3 | 4.79 | 0.55 | -3.42 |
| IPI00016915 | Insulin-like growth factor-binding protein 7 precursor | K.GKAGAAAGGPGVSGVCVK.S     | 3 | 3.94 | 0.37 | -0.47 |
| IPI00016915 | Insulin-like growth factor-binding protein 7 precursor | K.GTCEQGPSIVTPPK.D         | 2 | 3.30 | 0.28 | -3.60 |
| IPI00016915 | Insulin-like growth factor-binding protein 7 precursor | K.ITVVDALHEIPVK.K          | 1 | 2.38 | 0.23 | -1.62 |
| IPI00016915 | Insulin-like growth factor-binding protein 7 precursor | K.ITVVDALHEIPVK.K          | 2 | 3.97 | 0.44 | -3.63 |
| IPI00016915 | Insulin-like growth factor-binding protein 7 precursor | K.ITVVDALHEIPVK.K          | 3 | 2.67 | 0.37 | -1.34 |
| IPI00016915 | Insulin-like growth factor-binding protein 7 precursor | K.ITVVDALHEIPVKK.G         | 2 | 3.98 | 0.39 | -3.85 |
| IPI00016915 | Insulin-like growth factor-binding protein 7 precursor | K.ITVVDALHEIPVKK.G         | 3 | 2.58 | 0.38 | -3.13 |
| IPI00016915 | Insulin-like growth factor-binding protein 7 precursor | K.ITVVDALHEIPVKKGEGAE.L-   | 2 | 5.09 | 0.54 | -4.10 |
| IPI00016915 | Insulin-like growth factor-binding protein 7 precursor | K.ITVVDALHEIPVKKGEGAE.L-   | 3 | 3.88 | 0.36 | -4.45 |
| IPI00016915 | Insulin-like growth factor-binding protein 7 precursor | K.SRYPVCGSDGTTYPGCGQLR.A   | 3 | 3.98 | 0.26 | -5.08 |
| IPI00016915 | Insulin-like growth factor-binding protein 7 precursor | L.LPGDRDNLAIQTR.G          | 2 | 3.04 | 0.17 | -0.65 |
| IPI00016915 | Insulin-like growth factor-binding protein 7 precursor | L.PGDRDNLAIQTR.G           | 2 | 3.27 | 0.19 | -0.29 |
| IPI00016915 | Insulin-like growth factor-binding protein 7 precursor | R.DACGCCPM*CAR.G           | 2 | 3.26 | 0.40 | -3.72 |
| IPI00016915 | Insulin-like growth factor-binding protein 7 precursor | R.DNLAIQTR.G               | 1 | 2.56 | 0.11 | -3.88 |
| IPI00016915 | Insulin-like growth factor-binding protein 7 precursor | R.DNLAIQTR.G               | 2 | 3.07 | 0.17 | -3.13 |
| IPI00016915 | Insulin-like growth factor-binding protein 7 precursor | R.GEGEPCGGGGAGR.G          | 2 | 2.87 | 0.39 | -0.14 |
| IPI00016915 | Insulin-like growth factor-binding protein 7 precursor | R.GGPEKHEVTGWVLSPLSK.E     | 2 | 5.92 | 0.57 | -3.21 |
| IPI00016915 | Insulin-like growth factor-binding protein 7 precursor | R.GGPEKHEVTGWVLSPLSK.E     | 3 | 4.41 | 0.43 | -2.26 |

|             |                                                                 |                                               |   |      |      |       |
|-------------|-----------------------------------------------------------------|-----------------------------------------------|---|------|------|-------|
| IPI00016915 | Insulin-like growth factor-binding protein 7 precursor          | R.GGPEKHEVTGWVLVSPLSK.E                       | 4 | 4.13 | 0.39 | -2.55 |
| IPI00016915 | Insulin-like growth factor-binding protein 7 precursor          | R.GGPEKHEVTGWVLVSPLSKEDAGEYECHASNSQQQASASAK.I | 4 | 6.66 | 0.50 | -2.22 |
| IPI00016915 | Insulin-like growth factor-binding protein 7 precursor          | R.GGPEKHEVTGWVLVSPLSKEDAGEYECHASNSQQQASASAK.I | 5 | 5.18 | 0.35 | -2.36 |
| IPI00016915 | Insulin-like growth factor-binding protein 7 precursor          | R.GYCAPGM*ECVK.S                              | 1 | 2.25 | 0.30 | -2.43 |
| IPI00016915 | Insulin-like growth factor-binding protein 7 precursor          | R.GYCAPGM*ECVK.S                              | 2 | 2.90 | 0.37 | -1.70 |
| IPI00016915 | Insulin-like growth factor-binding protein 7 precursor          | R.TELLPGDRDNLAIQT.R                           | 2 | 2.92 | 0.35 | -1.70 |
| IPI00016915 | Insulin-like growth factor-binding protein 7 precursor          | R.TELLPGDRDNLAIQTR.G                          | 2 | 3.64 | 0.40 | -2.70 |
| IPI00016915 | Insulin-like growth factor-binding protein 7 precursor          | R.TELLPGDRDNLAIQTR.G                          | 3 | 2.73 | 0.24 | -2.41 |
| IPI00016915 | Insulin-like growth factor-binding protein 7 precursor          | R.YPVCGSDGTTYPSGCQLR.A                        | 2 | 4.88 | 0.57 | 1.05  |
| IPI00016915 | Insulin-like growth factor-binding protein 7 precursor          | T.VVDALHEIPVK.K                               | 2 | 2.99 | 0.39 | -1.19 |
| IPI00016915 | Insulin-like growth factor-binding protein 7 precursor          | V.VDALHEIPVK.K                                | 2 | 2.90 | 0.27 | -0.57 |
| IPI00016949 | Isoform 4 of Electrogenic sodium bicarbonate cotransporter 1    | R.DAEASNVLVGEVDFLDTPPIAFVR.L                  | 3 | 2.98 | 0.24 | -1.89 |
| IPI00017163 | Isoform 1 of E3 ubiquitin-protein ligase HECW2                  | R.KLETKGYGQGPGLK.L                            | 2 | 3.46 | 0.24 |       |
| IPI00017163 | Isoform 1 of E3 ubiquitin-protein ligase HECW2                  | R.KLETKGYGQGPGLK.L                            | 3 | 3.90 | 0.18 |       |
| IPI00017256 | Ras suppressor protein 1                                        | K.NLEVLNFFNMQIEELPTQISSLQK.L                  | 3 | 4.96 | 0.38 | -6.94 |
| IPI00017257 | Cathepsin O precursor                                           | K.DSEYPFK.A                                   | 2 | 2.08 | 0.12 | -2.59 |
| IPI00017257 | Cathepsin O precursor                                           | K.GKPLEDLSVQQVIDCSYNNYGCNGGSTLNALNWLNK.M      | 3 | 6.51 | 0.62 | -0.66 |
| IPI00017257 | Cathepsin O precursor                                           | K.GYSAYDFSDQEDM*AK.A                          | 2 | 5.37 | 0.61 | -3.58 |
| IPI00017257 | Cathepsin O precursor                                           | K.TGSTPYWIVR.N                                | 2 | 2.94 | 0.33 | -1.97 |
| IPI00017257 | Cathepsin O precursor                                           | R.ERAAAFR.E                                   | 2 | 2.16 | 0.05 | -4.02 |
| IPI00017334 | Prohibitin                                                      | K.AAELIANSLATAGDGLIELR.K                      | 3 | 4.84 | 0.35 | -1.79 |
| IPI00017334 | Prohibitin                                                      | R.AATFGLILDDVSLTHLTFGK.E                      | 2 | 3.10 | 0.24 | -2.14 |
| IPI00017529 | Isoform 1 of Lymphocyte function-associated antigen 3 precursor | K.M*ENDLPQK.I                                 | 2 | 2.64 | 0.05 | -2.57 |
| IPI00017557 | Secreted frizzled-related protein 4 precursor                   | R.GVCISPEAIVTDLPELVK.W                        | 2 | 5.63 | 0.45 | -2.74 |
| IPI00017557 | Secreted frizzled-related protein 4 precursor                   | R.M*M*LLENCLVEK.W                             | 2 | 3.46 | 0.29 | -2.03 |
| IPI00017562 | Isoform 2 of Latrophilin-2 precursor                            | M.IVISQLNPYTLR.F                              | 1 | 2.56 | 0.17 | -1.54 |
| IPI00017562 | Isoform 2 of Latrophilin-2 precursor                            | M.IVISQLNPYTLR.F                              | 2 | 3.88 | 0.38 | -4.45 |
| IPI00017562 | Isoform 2 of Latrophilin-2 precursor                            | R.AALPFGLVR.R                                 | 2 | 2.31 | 0.25 | -1.61 |
| IPI00017562 | Isoform 2 of Latrophilin-2 precursor                            | R.SGENAASLANELAK.H                            | 2 | 3.21 | 0.21 | -1.89 |

|             |                                     |                                     |   |      |      |       |
|-------------|-------------------------------------|-------------------------------------|---|------|------|-------|
| IPI00017567 | Isoform Long of Endoglin precursor  | K.TQILEWAAERGPITSAELNDPQSILLR.L     | 3 | 4.48 | 0.34 | -3.87 |
| IPI00017567 | Isoform Long of Endoglin precursor  | R.GEVYTTTSQVSK.G                    | 2 | 3.33 | 0.32 | -3.63 |
| IPI00017567 | Isoform Long of Endoglin precursor  | R.SAYSSCGMQVSAMISNEAVVNILSSSSPQRK.K | 3 | 2.53 | 0.09 | 2.16  |
| IPI00017567 | Isoform Long of Endoglin precursor  | R.VLPGHSAGPR.T                      | 2 | 1.90 | 0.13 | 0.79  |
| IPI00017569 | Fas apoptotic inhibitory molecule 2 | K.APGTEGQQQVHGEK.K                  | 2 | 3.35 | 0.36 | -4.53 |
| IPI00017569 | Fas apoptotic inhibitory molecule 2 | K.APGTEGQQQVHGEK.K                  | 3 | 2.28 | 0.34 | -1.97 |
| IPI00017569 | Fas apoptotic inhibitory molecule 2 | K.APGTEGQQQVHGEKK.E                 | 2 | 3.35 | 0.51 | -4.24 |
| IPI00017569 | Fas apoptotic inhibitory molecule 2 | K.EAPAVPSAPPSYEEATSGEGM*K.A         | 2 | 3.66 | 0.51 | -4.34 |
| IPI00017569 | Fas apoptotic inhibitory molecule 2 | K.EAPAVPSAPPSYEEATSGEGM*K.A         | 3 | 2.36 | 0.30 | -1.92 |
| IPI00017569 | Fas apoptotic inhibitory molecule 2 | K.KEAPAVPSAPPSYEEATSGEGM*K.A        | 3 | 3.63 | 0.35 | -1.04 |
| IPI00017569 | Fas apoptotic inhibitory molecule 2 | K.LSVANKAPGTEGQQQVHGEK.K            | 2 | 5.04 | 0.47 | -2.62 |
| IPI00017569 | Fas apoptotic inhibitory molecule 2 | K.LSVANKAPGTEGQQQVHGEK.K            | 3 | 5.28 | 0.40 | -2.20 |
| IPI00017569 | Fas apoptotic inhibitory molecule 2 | K.LSVANKAPGTEGQQQVHGEKK.E           | 3 | 4.72 | 0.37 | -4.35 |
| IPI00017569 | Fas apoptotic inhibitory molecule 2 | S.VANKAPGTEGQQQVHGEK.K              | 3 | 4.05 | 0.33 | -2.24 |
| IPI00017601 | Ceruloplasmin precursor             | A.YPLSIEPIGVR.F                     | 2 | 3.60 | 0.37 | -2.72 |
| IPI00017601 | Ceruloplasmin precursor             | D.PTKDIFTGLIGPM*K.I                 | 3 | 3.62 | 0.36 | -1.23 |
| IPI00017601 | Ceruloplasmin precursor             | F.PGTYQTLEM*FPR.T                   | 2 | 3.96 | 0.39 | -2.65 |
| IPI00017601 | Ceruloplasmin precursor             | I.ASGLIGPLIICK.K                    | 2 | 3.28 | 0.31 | -3.14 |
| IPI00017601 | Ceruloplasmin precursor             | I.ASGLIGPLIICKK.D                   | 2 | 3.32 | 0.20 | -2.45 |
| IPI00017601 | Ceruloplasmin precursor             | I.FPGTYQTLEM*FPR.T                  | 2 | 3.55 | 0.37 | -2.25 |
| IPI00017601 | Ceruloplasmin precursor             | I.SVDTEHSNIYLQNGPDR.I               | 2 | 5.41 | 0.45 | -3.04 |
| IPI00017601 | Ceruloplasmin precursor             | K.AEEEEHLGILGPQLHADVGDV.K           | 2 | 4.61 | 0.48 | -1.81 |
| IPI00017601 | Ceruloplasmin precursor             | K.AEEEEHLGILGPQLHADVGDV.K.I         | 2 | 5.48 | 0.48 | -4.54 |
| IPI00017601 | Ceruloplasmin precursor             | K.AEEEEHLGILGPQLHADVGDV.K.I         | 3 | 5.94 | 0.52 | -4.23 |
| IPI00017601 | Ceruloplasmin precursor             | K.AEEEEHLGILGPQLHADVGDV.K.I         | 4 | 4.17 | 0.28 | -4.31 |
| IPI00017601 | Ceruloplasmin precursor             | K.AEEEEHLGILGPQLHADVGDV.K.I         | 5 | 3.85 | 0.21 | -3.02 |
| IPI00017601 | Ceruloplasmin precursor             | K.AETGDKVYVHLK.N                    | 1 | 2.80 | 0.38 | -4.03 |
| IPI00017601 | Ceruloplasmin precursor             | K.AETGDKVYVHLK.N                    | 2 | 3.80 | 0.46 | -3.72 |
| IPI00017601 | Ceruloplasmin precursor             | K.AETGDKVYVHLK.N                    | 3 | 3.35 | 0.35 | -3.71 |
| IPI00017601 | Ceruloplasmin precursor             | K.AGLQAFFQVQECNK.S                  | 2 | 5.46 | 0.49 | -4.75 |
| IPI00017601 | Ceruloplasmin precursor             | K.AGLQAFFQVQECNK.S                  | 3 | 3.44 | 0.28 | -1.40 |
| IPI00017601 | Ceruloplasmin precursor             | K.ALYLQYTDETFR.T                    | 1 | 3.44 | 0.40 | -4.06 |
| IPI00017601 | Ceruloplasmin precursor             | K.ALYLQYTDETFR.T                    | 2 | 4.57 | 0.48 | -7.99 |
| IPI00017601 | Ceruloplasmin precursor             | K.DDEEFIESNK.M                      | 2 | 3.88 | 0.32 | -1.78 |
| IPI00017601 | Ceruloplasmin precursor             | K.DIASGLIGPLIICK.K                  | 1 | 3.82 | 0.42 | -3.04 |
| IPI00017601 | Ceruloplasmin precursor             | K.DIASGLIGPLIICK.K                  | 2 | 4.25 | 0.40 | -4.58 |
| IPI00017601 | Ceruloplasmin precursor             | K.DIASGLIGPLIICK.K                  | 3 | 3.93 | 0.36 | -1.97 |
| IPI00017601 | Ceruloplasmin precursor             | K.DIASGLIGPLIICKK.D                 | 2 | 4.86 | 0.36 | -3.58 |
| IPI00017601 | Ceruloplasmin precursor             | K.DIASGLIGPLIICKK.D                 | 3 | 1.78 | 0.12 | -0.45 |
| IPI00017601 | Ceruloplasmin precursor             | K.DIFTGLIGPM*K.I                    | 2 | 2.90 | 0.33 | -2.25 |
| IPI00017601 | Ceruloplasmin precursor             | K.DLYSGLIGPLIVCR.R                  | 1 | 3.90 | 0.49 | -3.87 |
| IPI00017601 | Ceruloplasmin precursor             | K.DLYSGLIGPLIVCR.R                  | 2 | 4.30 | 0.51 | -4.67 |

|             |                         |                                         |   |      |      |       |
|-------------|-------------------------|-----------------------------------------|---|------|------|-------|
| IPI00017601 | Ceruloplasmin precursor | K.DLYSGLIGPLIVCR.R                      | 3 | 5.48 | 0.37 | -2.73 |
| IPI00017601 | Ceruloplasmin precursor | K.DNEDFQESNR.M                          | 2 | 3.09 | 0.26 | -2.71 |
| IPI00017601 | Ceruloplasmin precursor | K.DVDKEFYLFPTVFDENESLLEDNIR.M           | 3 | 6.10 | 0.56 | -6.96 |
| IPI00017601 | Ceruloplasmin precursor | K.DVDKEFYLFPTVFDENESLLEDNIR.M           | 4 | 3.24 | 0.18 | -3.45 |
| IPI00017601 | Ceruloplasmin precursor | K.EFYLFPTVFDENESLLEDNIR.M               | 2 | 4.53 | 0.47 | -1.74 |
| IPI00017601 | Ceruloplasmin precursor | K.EFYLFPTVFDENESLLEDNIR.M               | 3 | 4.99 | 0.40 | -3.88 |
| IPI00017601 | Ceruloplasmin precursor | K.ERGPEEEHLGILGPVIWAEVGDTR.V            | 2 | 4.23 | 0.54 | -2.43 |
| IPI00017601 | Ceruloplasmin precursor | K.ERGPEEEHLGILGPVIWAEVGDTR.V            | 3 | 7.54 | 0.56 | -7.31 |
| IPI00017601 | Ceruloplasmin precursor | K.ERGPEEEHLGILGPVIWAEVGDTR.V            | 4 | 3.79 | 0.33 | -4.10 |
| IPI00017601 | Ceruloplasmin precursor | K.EVGPTNADPVCLAK.M                      | 1 | 2.64 | 0.39 | -1.13 |
| IPI00017601 | Ceruloplasmin precursor | K.EVGPTNADPVCLAK.M                      | 2 | 3.88 | 0.55 | -3.64 |
| IPI00017601 | Ceruloplasmin precursor | K.GAYPLSIEPIGVR.F                       | 1 | 2.54 | 0.33 | -2.91 |
| IPI00017601 | Ceruloplasmin precursor | K.GAYPLSIEPIGVR.F                       | 2 | 4.04 | 0.35 | -3.82 |
| IPI00017601 | Ceruloplasmin precursor | K.GAYPLSIEPIGVR.F                       | 3 | 3.51 | 0.13 | -3.01 |
| IPI00017601 | Ceruloplasmin precursor | K.GEFYIGSK.Y                            | 1 | 2.08 | 0.19 | -1.66 |
| IPI00017601 | Ceruloplasmin precursor | K.GEFYIGSK.Y                            | 2 | 2.73 | 0.26 | -2.70 |
| IPI00017601 | Ceruloplasmin precursor | K.HRGVYSSDVFDFPGTYQTLEM*FPR.T           | 4 | 3.83 | 0.39 | -1.14 |
| IPI00017601 | Ceruloplasmin precursor | K.HYYIGIETTWDYASDHGEK.K                 | 2 | 5.24 | 0.46 | -2.79 |
| IPI00017601 | Ceruloplasmin precursor | K.HYYIGIETTWDYASDHGEK.K                 | 3 | 6.53 | 0.58 | -5.59 |
| IPI00017601 | Ceruloplasmin precursor | K.HYYIGIETTWDYASDHGEK.L                 | 3 | 4.00 | 0.41 | -4.37 |
| IPI00017601 | Ceruloplasmin precursor | K.KALYLQYTDFTFR.T                       | 2 | 4.81 | 0.53 | -3.58 |
| IPI00017601 | Ceruloplasmin precursor | K.KALYLQYTDFTFR.T                       | 3 | 4.32 | 0.40 | -3.32 |
| IPI00017601 | Ceruloplasmin precursor | K.KLISVDTEHSNIYLQNGPDR.I                | 2 | 6.63 | 0.59 | -4.83 |
| IPI00017601 | Ceruloplasmin precursor | K.KLISVDTEHSNIYLQNGPDR.I                | 3 | 6.69 | 0.54 | -5.88 |
| IPI00017601 | Ceruloplasmin precursor | K.KLISVDTEHSNIYLQNGPDR.I                | 4 | 3.89 | 0.29 | -4.41 |
| IPI00017601 | Ceruloplasmin precursor | K.KLISVDTEHSNIYLQNGPDRIGR.L             | 3 | 4.94 | 0.45 | -3.75 |
| IPI00017601 | Ceruloplasmin precursor | K.KLISVDTEHSNIYLQNGPDRIGR.L             | 4 | 2.98 | 0.28 | -2.55 |
| IPI00017601 | Ceruloplasmin precursor | K.LISVDTEHSNIYLQNGPDR.I                 | 2 | 6.02 | 0.54 | -3.18 |
| IPI00017601 | Ceruloplasmin precursor | K.LISVDTEHSNIYLQNGPDR.I                 | 3 | 5.15 | 0.42 | -6.15 |
| IPI00017601 | Ceruloplasmin precursor | K.LISVDTEHSNIYLQNGPDRIGR.L              | 3 | 3.01 | 0.28 | -1.87 |
| IPI00017601 | Ceruloplasmin precursor | K.LVYREYTDASFTNR.K                      | 3 | 3.35 | 0.21 | -2.72 |
| IPI00017601 | Ceruloplasmin precursor | K.LVYREYTDASFTNRK.E                     | 2 | 3.01 | 0.30 | -4.94 |
| IPI00017601 | Ceruloplasmin precursor | K.LVYREYTDASFTNRK.E                     | 3 | 4.32 | 0.34 | -4.01 |
| IPI00017601 | Ceruloplasmin precursor | K.M*YYSAVDPTK.D                         | 1 | 1.99 | 0.06 | -3.35 |
| IPI00017601 | Ceruloplasmin precursor | K.M*YYSAVDPTK.D                         | 2 | 3.06 | 0.34 | -3.74 |
| IPI00017601 | Ceruloplasmin precursor | K.M*YYSAVDPTKDIFTGLIGPM*K.I             | 2 | 4.31 | 0.48 | -3.38 |
| IPI00017601 | Ceruloplasmin precursor | K.M*YYSAVDPTKDIFTGLIGPM*K.I             | 3 | 4.57 | 0.36 | -4.24 |
| IPI00017601 | Ceruloplasmin precursor | K.NLASRPYTFHSHGITYYK.E                  | 2 | 4.30 | 0.52 | -4.05 |
| IPI00017601 | Ceruloplasmin precursor | K.NLASRPYTFHSHGITYYK.E                  | 3 | 4.17 | 0.38 | -3.95 |
| IPI00017601 | Ceruloplasmin precursor | K.NM*ATRPYSIHAGVQTESSTVPTPLPGETLTYVWK.I | 4 | 4.05 | 0.24 | -4.52 |
| IPI00017601 | Ceruloplasmin precursor | K.NNEGTYYSPTYNPQSR.S                    | 2 | 5.00 | 0.47 | -3.76 |
| IPI00017601 | Ceruloplasmin precursor | K.NNEGTYYSPTYNPQSR.S                    | 3 | 3.27 | 0.17 | -3.26 |

|             |                         |                                            |   |      |      |       |
|-------------|-------------------------|--------------------------------------------|---|------|------|-------|
| IPI00017601 | Ceruloplasmin precursor | K.PVWLGLGPIIK.A                            | 2 | 4.19 | 0.44 | -3.44 |
| IPI00017601 | Ceruloplasmin precursor | K.TYCSEPEKVDKDNEDFQESNR.M                  | 3 | 4.93 | 0.40 |       |
| IPI00017601 | Ceruloplasmin precursor | K.TYCSEPEKVDKDNEDFQESNR.M                  | 4 | 2.21 | 0.11 | -1.17 |
| IPI00017601 | Ceruloplasmin precursor | K.TYSDHPEK.V                               | 2 | 2.65 | 0.32 | -2.09 |
| IPI00017601 | Ceruloplasmin precursor | K.TYSDHPEKVNKDDEEFIESNK.M                  | 2 | 5.12 | 0.53 | -4.66 |
| IPI00017601 | Ceruloplasmin precursor | K.TYSDHPEKVNKDDEEFIESNK.M                  | 3 | 6.29 | 0.57 | -3.86 |
| IPI00017601 | Ceruloplasmin precursor | K.TYSDHPEKVNKDDEEFIESNK.M                  | 4 | 2.98 | 0.36 | -3.08 |
| IPI00017601 | Ceruloplasmin precursor | K.TYSDHPEKVNKDDEEFIESNK.M                  | 5 | 2.49 | 0.13 | -2.22 |
| IPI00017601 | Ceruloplasmin precursor | K.VDKDNEDFQESNR.M                          | 2 | 4.40 | 0.45 | -2.97 |
| IPI00017601 | Ceruloplasmin precursor | K.VDKDNEDFQESNR.M                          | 3 | 4.20 | 0.26 | -1.33 |
| IPI00017601 | Ceruloplasmin precursor | K.VNKDDEEFIESNK.M                          | 2 | 4.32 | 0.33 | -5.08 |
| IPI00017601 | Ceruloplasmin precursor | K.VNKDDEEFIESNK.M                          | 3 | 4.50 | 0.26 | -1.35 |
| IPI00017601 | Ceruloplasmin precursor | K.VNKDDEEFIESNK*HAINGR.M                   | 3 | 3.00 | 0.27 | -5.32 |
| IPI00017601 | Ceruloplasmin precursor | K.VNKDDEEFIESNK*HAINGR.M                   | 4 | 3.54 | 0.15 | -2.20 |
| IPI00017601 | Ceruloplasmin precursor | K.VVYRQYTDSTFRVPVER.K                      | 3 | 3.20 | 0.32 | -1.44 |
| IPI00017601 | Ceruloplasmin precursor | K.WYLFGM*GNEVDVHAAFFHGQALTNK.N             | 3 | 3.54 | 0.36 | -4.14 |
| IPI00017601 | Ceruloplasmin precursor | K.WYLFGM*GNEVDVHAAFFHGQALTNK.N             | 4 | 4.01 | 0.43 | -4.32 |
| IPI00017601 | Ceruloplasmin precursor | K.YTVNQCR.R                                | 2 | 2.78 | 0.29 | -2.16 |
| IPI00017601 | Ceruloplasmin precursor | L.GPQLHADVGDKV.K.I                         | 2 | 3.28 | 0.40 | -4.07 |
| IPI00017601 | Ceruloplasmin precursor | L.ISVDTEHSNIYLNQGPDR.I                     | 2 | 4.72 | 0.45 | -1.92 |
| IPI00017601 | Ceruloplasmin precursor | L.YSGLIGPLIVCR.R                           | 2 | 3.20 | 0.28 | -6.01 |
| IPI00017601 | Ceruloplasmin precursor | R.ADDKVYPGEQYTYM*LLATEEQSPGEGDGNVCVTR.I    | 3 | 7.41 | 0.63 | -4.20 |
| IPI00017601 | Ceruloplasmin precursor | R.ADDKVYPGEQYTYM*LLATEEQSPGEGDGNVCVTR.I    | 4 | 5.82 | 0.61 | -2.88 |
| IPI00017601 | Ceruloplasmin precursor | R.ADDKVYPGEQYTYM*LLATEEQSPGEGDGNVCVTR.I    | 3 | 7.23 | 0.58 | -5.23 |
| IPI00017601 | Ceruloplasmin precursor | R.ADDKVYPGEQYTYM*LLATEEQSPGEGDGNVCVTR.I    | 4 | 5.24 | 0.40 | -4.95 |
| IPI00017601 | Ceruloplasmin precursor | R.DTANLFPQTSLLH.M                          | 2 | 4.04 | 0.44 | -4.36 |
| IPI00017601 | Ceruloplasmin precursor | R.DTANLFPQTSLLH*WPDTEGTFNVECLTTDHYTGGM*K.Q | 3 | 4.40 | 0.53 | -3.98 |
| IPI00017601 | Ceruloplasmin precursor | R.EYTDASFTNR.K                             | 1 | 2.35 | 0.45 | -3.89 |
| IPI00017601 | Ceruloplasmin precursor | R.EYTDASFTNR.K                             | 2 | 3.40 | 0.49 | -3.83 |
| IPI00017601 | Ceruloplasmin precursor | R.EYTDASFTNRK.E                            | 2 | 2.58 | 0.32 | -3.42 |
| IPI00017601 | Ceruloplasmin precursor | R.FNKNNEGTYYSPTYNPQSR.S                    | 2 | 5.74 | 0.38 | -4.97 |
| IPI00017601 | Ceruloplasmin precursor | R.FNKNNEGTYYSPTYNPQSR.S                    | 3 | 5.62 | 0.40 | -3.77 |
| IPI00017601 | Ceruloplasmin precursor | R.GPEEEHLGILGPVIWAEVGDITR.V                | 2 | 6.42 | 0.60 | -5.04 |
| IPI00017601 | Ceruloplasmin precursor | R.GPEEEHLGILGPVIWAEVGDITR.V                | 3 | 6.06 | 0.57 | -8.59 |
| IPI00017601 | Ceruloplasmin precursor | R.GPEEEHLGILGPVIWAEVGDITR.V                | 4 | 3.41 | 0.16 | -2.39 |
| IPI00017601 | Ceruloplasmin precursor | R.GVYSSDVFDIFPGTYQTLEM*FPR.T               | 2 | 5.11 | 0.59 | -5.55 |
| IPI00017601 | Ceruloplasmin precursor | R.GVYSSDVFDIFPGTYQTLEM*FPR.T               | 3 | 4.75 | 0.51 | -5.54 |
| IPI00017601 | Ceruloplasmin precursor | R.GVYSSDVFDIFPGTYQTLEM*FPR.T               | 4 | 4.13 | 0.29 | -4.06 |
| IPI00017601 | Ceruloplasmin precursor | R.GVYSSDVFDIFPGTYQTLEM*FPR.T               | 2 | 5.09 | 0.55 | -4.10 |
| IPI00017601 | Ceruloplasmin precursor | R.GVYSSDVFDIFPGTYQTLEM*FPR.T               | 3 | 3.98 | 0.40 | -2.99 |
| IPI00017601 | Ceruloplasmin precursor | R.HYYIAAEEIWNYPAGSIDIFTK.E                 | 3 | 4.28 | 0.32 | -6.01 |
| IPI00017601 | Ceruloplasmin precursor | R.IDTINLFPATLFDAY.M                        | 2 | 3.27 | 0.39 | -4.19 |

|             |                         |                                            |   |      |      |       |
|-------------|-------------------------|--------------------------------------------|---|------|------|-------|
| IPI00017601 | Ceruloplasmin precursor | R.IDTINLFPATLFDAYM*VAQNPGGEWM*LSCQNLNHLK.A | 3 | 5.70 | 0.44 | -4.83 |
| IPI00017601 | Ceruloplasmin precursor | R.IDTINLFPATLFDAYM*VAQNPGGEWM*LSCQNLNHLK.A | 4 | 5.65 | 0.48 | -5.83 |
| IPI00017601 | Ceruloplasmin precursor | R.IDTINLFPATLFDAYM*VAQNPGGEWM*LSCQNLNHLK.A | 5 | 2.84 | 0.10 | -4.92 |
| IPI00017601 | Ceruloplasmin precursor | R.IDTINLFPATLFDAYM*VAQNPGGEWMLSCQNLNHLK.A  | 3 | 5.25 | 0.15 | -3.14 |
| IPI00017601 | Ceruloplasmin precursor | R.IDTINLFPATLFDAYM*VAQNPGEWMLSCQNLNHLK.A   | 4 | 4.04 | 0.14 | -4.54 |
| IPI00017601 | Ceruloplasmin precursor | R.IDTINLFPATLFDAYMVAQNPGGEWM*LSCQNLNHLK.A  | 4 | 5.40 | 0.13 | -3.59 |
| IPI00017601 | Ceruloplasmin precursor | R.IYHSHIDAPK.D                             | 1 | 2.88 | 0.25 | -5.05 |
| IPI00017601 | Ceruloplasmin precursor | R.IYHSHIDAPK.D                             | 2 | 2.59 | 0.24 | -3.95 |
| IPI00017601 | Ceruloplasmin precursor | R.IYHSHIDAPKDIASGLIGPLIICK.K               | 3 | 4.19 | 0.44 | -5.22 |
| IPI00017601 | Ceruloplasmin precursor | R.KAEEEEHLGILGPQLHADVGDK.V                 | 2 | 5.78 | 0.48 | -3.36 |
| IPI00017601 | Ceruloplasmin precursor | R.KAEEEEHLGILGPQLHADVGDK.V                 | 3 | 6.44 | 0.54 | -6.82 |
| IPI00017601 | Ceruloplasmin precursor | R.KAEEEEHLGILGPQLHADVGDK.V                 | 4 | 4.17 | 0.39 | -3.48 |
| IPI00017601 | Ceruloplasmin precursor | R.KAEEEEHLGILGPQLHADVGDKVK.I               | 2 | 5.96 | 0.61 | -4.90 |
| IPI00017601 | Ceruloplasmin precursor | R.KAEEEEHLGILGPQLHADVGDKVK.I               | 3 | 7.25 | 0.57 | -6.07 |
| IPI00017601 | Ceruloplasmin precursor | R.KAEEEEHLGILGPQLHADVGDKVK.I               | 4 | 5.47 | 0.51 | -4.56 |
| IPI00017601 | Ceruloplasmin precursor | R.KAEEEEHLGILGPQLHADVGDKVK.I               | 5 | 4.05 | 0.40 | -3.99 |
| IPI00017601 | Ceruloplasmin precursor | R.KAEEEEHLGILGPQLHADVGDKVK.I               | 6 | 2.12 | 0.22 | -3.61 |
| IPI00017601 | Ceruloplasmin precursor | R.KLEFALLFLVFDENESWYLDDNIK.T               | 3 | 5.27 | 0.36 |       |
| IPI00017601 | Ceruloplasmin precursor | R.M*FTTAPDQVDKEDEDFQESNK.M                 | 2 | 5.02 | 0.56 | -3.37 |
| IPI00017601 | Ceruloplasmin precursor | R.M*FTTAPDQVDKEDEDFQESNK.M                 | 3 | 3.92 | 0.47 | -3.17 |
| IPI00017601 | Ceruloplasmin precursor | R.M*YSVNGYTFGSLPGLSM*CAEDR.V               | 2 | 4.79 | 0.61 | -1.87 |
| IPI00017601 | Ceruloplasmin precursor | R.M*YSVNGYTFGSLPGLSM*CAEDR.V               | 3 | 4.87 | 0.48 | -1.64 |
| IPI00017601 | Ceruloplasmin precursor | R.M*YSVNGYTFGSLPGLSM*CAEDRVK.W             | 3 | 3.31 | 0.41 | -2.51 |
| IPI00017601 | Ceruloplasmin precursor | R.PYSIHAGVQTESSTVPTPLPGETLTYVVK.I          | 4 | 4.49 | 0.31 | -2.82 |
| IPI00017601 | Ceruloplasmin precursor | R.PYTFHSHGITYYK.E                          | 2 | 4.18 | 0.51 | -4.08 |
| IPI00017601 | Ceruloplasmin precursor | R.QKDVDKEFYLFPTVFDENESLLEDNIR.M            | 3 | 6.14 | 0.57 | -5.17 |
| IPI00017601 | Ceruloplasmin precursor | R.QKDVDKEFYLFPTVFDENESLLEDNIR.M            | 4 | 4.68 | 0.33 | -6.05 |
| IPI00017601 | Ceruloplasmin precursor | R.QSEDSTFYLGGER.T                          | 2 | 3.54 | 0.43 | -5.44 |
| IPI00017601 | Ceruloplasmin precursor | R.QYTDSTFR.V                               | 2 | 1.55 | 0.21 | -1.78 |
| IPI00017601 | Ceruloplasmin precursor | R.QYTDSTFRVPVER.K                          | 3 | 1.89 | 0.27 | -2.61 |
| IPI00017601 | Ceruloplasmin precursor | R.RQSEDSTFYLGGER.T                         | 2 | 4.60 | 0.44 | -3.84 |
| IPI00017601 | Ceruloplasmin precursor | R.RQSEDSTFYLGGER.T                         | 3 | 3.33 | 0.11 | -1.79 |
| IPI00017601 | Ceruloplasmin precursor | R.SGAGTEDSACIPWAYYSTVDQVK.D                | 2 | 5.21 | 0.51 | -5.00 |
| IPI00017601 | Ceruloplasmin precursor | R.SGAGTEDSACIPWAYYSTVDQVK.D                | 3 | 5.41 | 0.54 | -5.56 |
| IPI00017601 | Ceruloplasmin precursor | R.SGAGTEDSACIPWAYYSTVDQVKDLYSGLIGPLIVCR.R  | 3 | 6.30 | 0.61 | -3.01 |
| IPI00017601 | Ceruloplasmin precursor | R.SGAGTEDSACIPWAYYSTVDQVKDLYSGLIGPLIVCR.R  | 4 | 4.30 | 0.30 | -3.75 |
| IPI00017601 | Ceruloplasmin precursor | R.SVPPSASHVAPTETFT.Y                       | 2 | 2.97 | 0.46 | -2.15 |
| IPI00017601 | Ceruloplasmin precursor | R.SVPPSASHVAPTETFTYEWTVPK.E                | 2 | 3.33 | 0.38 | -5.37 |
| IPI00017601 | Ceruloplasmin precursor | R.SVPPSASHVAPTETFTYEWTVPK.E                | 3 | 3.41 | 0.36 | -5.94 |
| IPI00017601 | Ceruloplasmin precursor | R.TTIEKPVWLGFLGPIIK.A                      | 2 | 4.91 | 0.49 | -4.57 |
| IPI00017601 | Ceruloplasmin precursor | R.TTIEKPVWLGFLGPIIK.A                      | 3 | 3.81 | 0.20 | -6.26 |
| IPI00017601 | Ceruloplasmin precursor | R.TTIEKPVWLGFLGPIIK.A                      | 4 | 2.59 | 0.26 | -1.40 |

|             |                                       |                                   |   |      |      |       |
|-------------|---------------------------------------|-----------------------------------|---|------|------|-------|
| IPI00017601 | Ceruloplasmin precursor               | R.VTFHNKGAYPLSIEPIGVR.F           | 3 | 4.11 | 0.42 | -3.25 |
| IPI00017601 | Ceruloplasmin precursor               | S.VPPSASHVAPTETFTYEWTVPK.E        | 3 | 3.74 | 0.40 | -2.98 |
| IPI00017601 | Ceruloplasmin precursor               | V.PPSASHVAPTETFTYEWTVPK.E         | 2 | 4.15 | 0.56 | -2.44 |
| IPI00017601 | Ceruloplasmin precursor               | W.AYYSTVDQVK.D                    | 1 | 2.39 | 0.30 | -3.51 |
| IPI00017601 | Ceruloplasmin precursor               | W.AYYSTVDQVK.D                    | 2 | 3.02 | 0.35 | -3.31 |
| IPI00017601 | Ceruloplasmin precursor               | W.LGFLGPIIK.A                     | 2 | 3.37 | 0.24 | -0.93 |
| IPI00017601 | Ceruloplasmin precursor               | W.PDTEGTFNVECLTTDHYTGGM*K.Q       | 3 | 3.52 | 0.48 | -2.13 |
| IPI00017601 | Ceruloplasmin precursor               | Y.LFPTVFDENESLLEDNIR.M            | 2 | 4.27 | 0.34 | -4.81 |
| IPI00017601 | Ceruloplasmin precursor               | Y.PLSIEPIGVR.F                    | 1 | 2.42 | 0.23 | -3.78 |
| IPI00017601 | Ceruloplasmin precursor               | Y.PLSIEPIGVR.F                    | 2 | 3.32 | 0.15 | -2.07 |
| IPI00017659 | Protein kinase substrate CapZIP       | R.VQNEEVGPEHDSQETK.K              | 3 | 2.14 | 0.13 | -1.70 |
| IPI00017696 | Complement C1s subcomponent precursor | A.EPTM*YGEILSPNYPQAYPSEVEK.S      | 2 | 4.61 | 0.53 | -5.58 |
| IPI00017696 | Complement C1s subcomponent precursor | A.EPTM*YGEILSPNYPQAYPSEVEK.S      | 3 | 5.10 | 0.46 | -4.47 |
| IPI00017696 | Complement C1s subcomponent precursor | K.CQPVDGPIPESIENGVEDPESTLFGSVIR.Y | 3 | 3.94 | 0.24 |       |
| IPI00017696 | Complement C1s subcomponent precursor | K.CVPVCGVPR.E                     | 2 | 2.25 | 0.19 |       |
| IPI00017696 | Complement C1s subcomponent precursor | K.CVPVCGVPREPFEEK.Q               | 2 | 4.05 | 0.24 |       |
| IPI00017696 | Complement C1s subcomponent precursor | K.EDTPNSVWEPAK.A                  | 2 | 3.33 | 0.31 | -3.34 |
| IPI00017696 | Complement C1s subcomponent precursor | K.EVKVEKPTADAEAYVFTPN.M           | 2 | 4.04 | 0.48 | -1.83 |
| IPI00017696 | Complement C1s subcomponent precursor | K.EVKVEKPTADAEAYVFTPNM*ICAGGEK.G  | 3 | 4.71 | 0.09 |       |
| IPI00017696 | Complement C1s subcomponent precursor | K.FYAAGLVSWGPGCGTYGLYTR.V         | 2 | 4.15 | 0.51 | -3.51 |
| IPI00017696 | Complement C1s subcomponent precursor | K.FYAAGLVSWGPGCGTYGLYTR.V         | 3 | 4.47 | 0.16 | -2.57 |
| IPI00017696 | Complement C1s subcomponent precursor | K.GDSGGAFAVQDPNDK.T               | 2 | 4.72 | 0.50 | -4.42 |
| IPI00017696 | Complement C1s subcomponent precursor | K.GDSGGAFAVQDPNDKTK.F             | 2 | 4.37 | 0.34 | -3.40 |
| IPI00017696 | Complement C1s subcomponent precursor | K.GM*DSCKGDSGGAFAVQDPNDKTK.F      | 3 | 3.79 | 0.37 | -2.08 |
| IPI00017696 | Complement C1s subcomponent precursor | K.GM*DSCKGDSGGAFAVQDPNDKTK.F      | 2 | 3.87 | 0.43 |       |
| IPI00017696 | Complement C1s subcomponent precursor | K.GM*DSCKGDSGGAFAVQDPNDKTK.F      | 3 | 6.04 | 0.32 |       |
| IPI00017696 | Complement C1s subcomponent precursor | K.NYVDWIM*K.T                     | 1 | 2.11 | 0.06 | -3.24 |
| IPI00017696 | Complement C1s subcomponent precursor | K.SDFSNEER.F                      | 2 | 2.18 | 0.17 | -2.43 |
| IPI00017696 | Complement C1s subcomponent precursor | K.SNALDIIFQDNLGTGQK.K             | 2 | 5.63 | 0.44 | -5.46 |
| IPI00017696 | Complement C1s subcomponent precursor | K.SNALDIIFQDNLGTGQK.K             | 3 | 5.96 | 0.41 | -2.34 |
| IPI00017696 | Complement C1s subcomponent precursor | K.SNALDIIFQDNLGTGQK.K             | 2 | 4.94 | 0.49 | -5.01 |
| IPI00017696 | Complement C1s subcomponent precursor | K.SNALDIIFQDNLGTGQK.K             | 3 | 3.45 | 0.39 | -3.81 |
| IPI00017696 | Complement C1s subcomponent precursor | K.TM*QENSTPRED.-                  | 2 | 3.28 | 0.41 | -4.61 |
| IPI00017696 | Complement C1s subcomponent precursor | K.VEKPTADAEAYVFTPN.M              | 2 | 3.80 | 0.37 | -3.34 |
| IPI00017696 | Complement C1s subcomponent precursor | K.VEKPTADAEAYVFTPNM*ICAGGEK.G     | 2 | 5.50 | 0.62 | -3.28 |
| IPI00017696 | Complement C1s subcomponent precursor | K.VEKPTADAEAYVFTPNM*ICAGGEK.G     | 3 | 4.36 | 0.39 | -3.59 |
| IPI00017696 | Complement C1s subcomponent precursor | K.VEKPTADAEAYVFTPNM*ICAGGEK.G     | 4 | 3.09 | 0.22 | -2.46 |
| IPI00017696 | Complement C1s subcomponent precursor | K.VEKPTADAEAYVFTPNMICAGGEK.G      | 3 | 4.31 | 0.23 |       |
| IPI00017696 | Complement C1s subcomponent precursor | R.CEYQIR.L                        | 2 | 2.44 | 0.12 | -2.67 |
| IPI00017696 | Complement C1s subcomponent precursor | R.DVVQITCLDGFEVVEGR.V             | 2 | 5.54 | 0.49 | -6.79 |
| IPI00017696 | Complement C1s subcomponent precursor | R.DVVQITCLDGFEVVEGR.V             | 3 | 4.71 | 0.35 | -4.17 |
| IPI00017696 | Complement C1s subcomponent precursor | R.EDFDVEAADSAGNCLDSLIVFVAGDR.Q    | 2 | 5.68 | 0.43 |       |

|             |                                         |                                |   |      |      |       |
|-------------|-----------------------------------------|--------------------------------|---|------|------|-------|
| IPI00017696 | Complement C1s subcomponent precursor   | R.EDFDVEAADSAGNCLDSLVLVAGDR.Q  | 3 | 5.35 | 0.31 |       |
| IPI00017696 | Complement C1s subcomponent precursor   | R.EPTM*YVGSTSVQTSR.L           | 2 | 3.48 | 0.44 | -2.93 |
| IPI00017696 | Complement C1s subcomponent precursor   | R.EPTM*YVGSTSVQTSR.L           | 3 | 3.16 | 0.33 | -2.46 |
| IPI00017696 | Complement C1s subcomponent precursor   | R.EPTMYVGSTSVQTSR.L            | 3 | 3.71 | 0.06 |       |
| IPI00017696 | Complement C1s subcomponent precursor   | R.IIGGSDADIK.N                 | 1 | 1.98 | 0.11 | -3.29 |
| IPI00017696 | Complement C1s subcomponent precursor   | R.IIGGSDADIK.N                 | 2 | 2.57 | 0.14 | -2.58 |
| IPI00017696 | Complement C1s subcomponent precursor   | R.QFGPYCGHGFGPLNIETK.S         | 2 | 2.52 | 0.12 |       |
| IPI00017696 | Complement C1s subcomponent precursor   | R.REDFDVEAADSAGNCLDSLVLVAGDR.Q | 3 | 4.07 | 0.49 | -2.65 |
| IPI00017696 | Complement C1s subcomponent precursor   | R.SSNNPHSPIVEEFQVPYNK.L        | 2 | 4.59 | 0.46 | -4.20 |
| IPI00017696 | Complement C1s subcomponent precursor   | R.SSNNPHSPIVEEFQVPYNK.L        | 3 | 3.54 | 0.19 | -2.91 |
| IPI00017696 | Complement C1s subcomponent precursor   | R.SSNNPHSPIVEEFQVPYNKLQVIFK.S  | 3 | 4.04 | 0.37 | -4.49 |
| IPI00017696 | Complement C1s subcomponent precursor   | R.SSNNPHSPIVEEFQVPYNKLQVIFK.S  | 4 | 5.12 | 0.37 | -4.83 |
| IPI00017696 | Complement C1s subcomponent precursor   | R.TNFDNDIALVR.L                | 1 | 2.41 | 0.37 | -1.61 |
| IPI00017696 | Complement C1s subcomponent precursor   | R.TNFDNDIALVR.L                | 2 | 3.89 | 0.41 | -3.75 |
| IPI00017696 | Complement C1s subcomponent precursor   | R.VGATSFYSTCQSNK.W             | 2 | 4.75 | 0.43 | -1.38 |
| IPI00017696 | Complement C1s subcomponent precursor   | R.VGATSFYSTCQSNK.W             | 3 | 4.70 | 0.44 | -0.04 |
| IPI00017696 | Complement C1s subcomponent precursor   | R.VKNYVDWIM*K.T                | 2 | 2.87 | 0.32 | -2.17 |
| IPI00017696 | Complement C1s subcomponent precursor   | R.VKNYVDWIM*K.T                | 3 | 3.01 | 0.11 | -2.95 |
| IPI00017696 | Complement C1s subcomponent precursor   | W.VNEVLGPELPK.C                | 2 | 3.31 | 0.25 | -1.01 |
| IPI00017704 | Coactosin-like protein                  | K.EFVISDRK.E                   | 2 | 2.42 | 0.07 | -2.26 |
| IPI00017704 | Coactosin-like protein                  | K.EFVISDRKELEEDFIKSELKK.A      | 3 | 4.70 | 0.38 | -2.98 |
| IPI00017704 | Coactosin-like protein                  | K.FALITWIGENVSLQR.A            | 2 | 4.79 | 0.37 | -3.82 |
| IPI00017704 | Coactosin-like protein                  | K.FALITWIGENVSLQR.A            | 3 | 5.20 | 0.44 | -3.54 |
| IPI00017704 | Coactosin-like protein                  | R.FTTGDAM*SK.R                 | 2 | 2.23 | 0.20 | -1.60 |
| IPI00017704 | Coactosin-like protein                  | R.FTTGDAM*SKR.S                | 2 | 2.50 | 0.26 | -2.14 |
| IPI00017704 | Coactosin-like protein                  | R.KELEEDFIKSELKK.A             | 3 | 4.35 | 0.32 | -3.76 |
| IPI00017704 | Coactosin-like protein                  | R.KELEEDFIKSELKK.A             | 4 | 4.01 | 0.28 | -3.95 |
| IPI00017745 | Metalloproteinase inhibitor 4 precursor | K.VFIHLCNYIEPWEDLSLVQR.E       | 3 | 3.63 | 0.17 |       |
| IPI00017745 | Metalloproteinase inhibitor 4 precursor | K.VKDVQYIYTPFDSSLGCVK.L        | 2 | 3.79 | 0.35 |       |
| IPI00017745 | Metalloproteinase inhibitor 4 precursor | K.VVPASADPADTEK.M              | 2 | 1.54 | 0.22 | -3.41 |
| IPI00017841 | Isoform 1 of Noelin precursor           | K.LTGISDPVTVK.T                | 1 | 2.23 | 0.16 | -3.51 |
| IPI00017841 | Isoform 1 of Noelin precursor           | K.LTGISDPVTVK.T                | 2 | 3.27 | 0.27 | -1.41 |
| IPI00017841 | Isoform 1 of Noelin precursor           | K.M*DELRLIPVLEEYKADAK.L        | 4 | 2.59 | 0.12 | -2.22 |
| IPI00017841 | Isoform 1 of Noelin precursor           | R.CICTVAPQTM*CSR.D             | 2 | 4.43 | 0.49 | -2.54 |
| IPI00017841 | Isoform 1 of Noelin precursor           | W.QVYSSAQDSEGR.C               | 2 | 3.42 | 0.50 | -2.96 |
| IPI00017940 | LMBR1 domain-containing protein 2       | -.M*SGAALGLEIVFVFLALFLLHR.Y    | 3 | 2.18 | 0.12 | 0.08  |
| IPI00017964 | Small nuclear ribonucleoprotein Sm D3   | R.GRGRGM*GRGNIFQKR.R           | 2 | 2.07 | 0.22 |       |
| IPI00017968 | ADM precursor                           | K.AGPAQTLIRPQDM*K.G            | 2 | 2.63 | 0.20 | -2.70 |
| IPI00017968 | ADM precursor                           | K.AGPAQTLIRPQDM*K.G            | 3 | 2.07 | 0.11 | -1.24 |
| IPI00017968 | ADM precursor                           | K.GASRSPEDSSPDAAR.I            | 2 | 3.66 | 0.38 | -3.00 |
| IPI00017968 | ADM precursor                           | R.SPEDSSPDAAR.I                | 2 | 3.27 | 0.33 | -3.03 |
| IPI00017968 | ADM precursor                           | R.TLVSSKQAHGAPPPSGSAPH.F       | 3 | 4.60 | 0.43 | -2.74 |



|             |                                                               |                                       |   |      |      |       |
|-------------|---------------------------------------------------------------|---------------------------------------|---|------|------|-------|
| IPI00017968 | ADM precursor                                                 | R.TLVSSKPQAHGAPAPPSGSAPHFL.-          | 3 | 3.03 | 0.13 | -3.48 |
| IPI00018027 | Isoform 1 of Angiogenic factor with G patch and FHA domains 1 | K.KDESFVGPPTSKEEKELERRKELKK.I         | 3 | 3.71 | 0.08 |       |
| IPI00018098 | Isoform 1 of Pre-mRNA-splicing factor 38B                     | K.TAGQTGMCGGVR.G                      | 2 | 2.78 | 0.10 |       |
| IPI00018136 | Isoform 1 of Vascular cell adhesion protein 1 precursor       | K.CSVADVYPFDRLEIDLLK.G                | 3 | 3.23 | 0.34 | -4.68 |
| IPI00018136 | Isoform 1 of Vascular cell adhesion protein 1 precursor       | K.CSVADVYPFDRLEIDLLKGDHLM*K.S         | 3 | 2.67 | 0.06 | -4.99 |
| IPI00018136 | Isoform 1 of Vascular cell adhesion protein 1 precursor       | K.CSVADVYPFDRLEIDLLKGDHLM*K.S         | 4 | 3.09 | 0.32 | -3.55 |
| IPI00018136 | Isoform 1 of Vascular cell adhesion protein 1 precursor       | K.ELQVYISPK.N                         | 1 | 2.50 | 0.12 | -2.89 |
| IPI00018136 | Isoform 1 of Vascular cell adhesion protein 1 precursor       | K.EVELIVQEKPFTVEISPGPR.I              | 3 | 4.85 | 0.42 | -3.88 |
| IPI00018136 | Isoform 1 of Vascular cell adhesion protein 1 precursor       | K.GIQVEIYSFPKDPEIHLSGPLEAGKPITVK.C    | 3 | 6.53 | 0.59 | -4.11 |
| IPI00018136 | Isoform 1 of Vascular cell adhesion protein 1 precursor       | K.KAETGDTVLK.S                        | 2 | 2.48 | 0.17 | -2.60 |
| IPI00018136 | Isoform 1 of Vascular cell adhesion protein 1 precursor       | K.LHIDDM*EFEPK.Q                      | 2 | 2.98 | 0.35 | -2.95 |
| IPI00018136 | Isoform 1 of Vascular cell adhesion protein 1 precursor       | K.LTAFPSESVK.E                        | 2 | 2.36 | 0.13 | -2.75 |
| IPI00018136 | Isoform 1 of Vascular cell adhesion protein 1 precursor       | K.NTVISVNPSTK.L                       | 1 | 2.50 | 0.35 | -2.89 |
| IPI00018136 | Isoform 1 of Vascular cell adhesion protein 1 precursor       | K.SIDGAYTIR.K                         | 1 | 1.72 | 0.16 | -2.61 |
| IPI00018136 | Isoform 1 of Vascular cell adhesion protein 1 precursor       | K.SIDGAYTIRK.A                        | 2 | 1.81 | 0.13 | -2.97 |
| IPI00018136 | Isoform 1 of Vascular cell adhesion protein 1 precursor       | K.SLEVTFTPVIEDIGK.V                   | 2 | 4.80 | 0.45 | -4.85 |
| IPI00018136 | Isoform 1 of Vascular cell adhesion protein 1 precursor       | K.SQEFLEDADRK.S                       | 2 | 3.87 | 0.29 | -1.26 |
| IPI00018136 | Isoform 1 of Vascular cell adhesion protein 1 precursor       | K.VPSVYPLDRLEIELLK.G                  | 2 | 3.11 | 0.11 | -3.92 |
| IPI00018136 | Isoform 1 of Vascular cell adhesion protein 1 precursor       | K.VPSVYPLDRLEIELLK.G                  | 3 | 2.45 | 0.24 | -2.84 |
| IPI00018136 | Isoform 1 of Vascular cell adhesion protein 1 precursor       | K.VTNEGTTSTLTM*NPVSGFNEHSYLCTATCESR.K | 3 | 5.91 | 0.63 | -3.34 |
| IPI00018136 | Isoform 1 of Vascular cell adhesion protein 1 precursor       | R.M*EDSGIYVCEGVNLIGK.N                | 2 | 5.21 | 0.58 | -4.87 |
| IPI00018136 | Isoform 1 of Vascular cell adhesion protein 1 precursor       | R.QSTQTLTYVNVAPR.D                    | 2 | 4.28 | 0.42 | -3.01 |

|             |                                                                 |                                    |   |      |      |       |
|-------------|-----------------------------------------------------------------|------------------------------------|---|------|------|-------|
| IPI00018136 | Isoform 1 of Vascular cell adhesion protein 1 precursor         | R.TQIDSPLNGK.V                     | 2 | 1.98 | 0.12 | -2.99 |
| IPI00018136 | Isoform 1 of Vascular cell adhesion protein 1 precursor         | R.TQIDSPLSGK.V                     | 1 | 2.31 | 0.32 | -2.99 |
| IPI00018136 | Isoform 1 of Vascular cell adhesion protein 1 precursor         | R.TQIDSPLSGK.V                     | 2 | 2.20 | 0.14 | -1.26 |
| IPI00018146 | 14-3-3 protein theta                                            | K.TAFDEAIAELDTLNEDSYKDSTLIM*QLLR.D | 3 | 5.15 | 0.50 | -8.16 |
| IPI00018146 | 14-3-3 protein theta                                            | R.NLLSVAYK.N                       | 1 | 1.68 | 0.08 | -2.46 |
| IPI00018146 | 14-3-3 protein theta                                            | R.NLLSVAYK.N                       | 2 | 2.28 | 0.09 | -1.47 |
| IPI00018146 | 14-3-3 protein theta                                            | R.YDDM*ATCM*K.A                    | 2 | 2.07 | 0.23 | -2.36 |
| IPI00018206 | Aspartate aminotransferase, mitochondrial precursor             | K.ASAELALGENSEVLK.S                | 2 | 3.24 | 0.19 | -3.82 |
| IPI00018206 | Aspartate aminotransferase, mitochondrial precursor             | K.M*NLGVGAYRDDNGKPYVLPVSR.K        | 3 | 3.54 | 0.37 | -2.80 |
| IPI00018206 | Aspartate aminotransferase, mitochondrial precursor             | K.M*NLGVGAYRDDNGKPYVLPVSR.K        | 4 | 3.47 | 0.25 | -3.00 |
| IPI00018206 | Aspartate aminotransferase, mitochondrial precursor             | R.DAGM*QLQGYR.Y                    | 2 | 3.46 | 0.30 | -2.82 |
| IPI00018206 | Aspartate aminotransferase, mitochondrial precursor             | R.JAAAILNTPDLRK.Q                  | 2 | 1.73 | 0.12 | -2.21 |
| IPI00018206 | Aspartate aminotransferase, mitochondrial precursor             | R.KAEAQIAAKNLDKEYLPIGGLAEFCK.A     | 3 | 3.17 | 0.16 |       |
| IPI00018206 | Aspartate aminotransferase, mitochondrial precursor             | R.NLFAFFDMAYQGFASGDGDKDAWAVR.H     | 3 | 2.54 | 0.15 | -2.44 |
| IPI00018208 | Tetratricopeptide repeat protein 33                             | R.TLQEQQKVAQR.I                    | 2 | 2.61 | 0.11 |       |
| IPI00018219 | Transforming growth factor-beta-induced protein ig-h3 precursor | K.ADHHATNGVVHLIDK.V                | 3 | 2.95 | 0.23 | -3.29 |
| IPI00018219 | Transforming growth factor-beta-induced protein ig-h3 precursor | K.ADHHATNGVVHLIDK.V                | 4 | 2.76 | 0.19 | -3.91 |
| IPI00018219 | Transforming growth factor-beta-induced protein ig-h3 precursor | K.AIISNKDILATNGVIHYIDELLIPSAK.T    | 3 | 7.14 | 0.55 | -6.10 |
| IPI00018219 | Transforming growth factor-beta-induced protein ig-h3 precursor | K.AIISNKDILATNGVIHYIDELLIPSAK.T    | 4 | 2.98 | 0.20 | -3.97 |
| IPI00018219 | Transforming growth factor-beta-induced protein ig-h3 precursor | K.DGTPPIDAHR.N                     | 1 | 2.45 | 0.29 | -3.28 |
| IPI00018219 | Transforming growth factor-beta-induced protein ig-h3 precursor | K.DGTPPIDAHR.N                     | 2 | 2.26 | 0.24 | -3.72 |
| IPI00018219 | Transforming growth factor-beta-induced protein ig-h3 precursor | K.DILATNGVIHYIDELLIPSAK.T          | 2 | 5.14 | 0.44 | -3.59 |
| IPI00018219 | Transforming growth factor-beta-induced protein ig-h3 precursor | K.DILATNGVIHYIDELLIPSAK.T          | 3 | 3.64 | 0.34 | -4.35 |

|             |                                                                 |                                               |   |      |      |       |
|-------------|-----------------------------------------------------------------|-----------------------------------------------|---|------|------|-------|
| IPI00018219 | Transforming growth factor-beta-induced protein ig-h3 precursor | K.GCPAALPLSNLYETLGVVGSTTTQLYTDR.T             | 3 | 3.94 | 0.34 | 0.07  |
| IPI00018219 | Transforming growth factor-beta-induced protein ig-h3 precursor | K.GCPAALPLSNLYETLGVVGSTTTQLYTDRTEK.L          | 3 | 3.91 | 0.38 | -5.17 |
| IPI00018219 | Transforming growth factor-beta-induced protein ig-h3 precursor | K.GCPAALPLSNLYETLGVVGSTTTQLYTDRTEK.L          | 4 | 4.59 | 0.34 | -6.00 |
| IPI00018219 | Transforming growth factor-beta-induced protein ig-h3 precursor | K.IPSETLNR.I                                  | 2 | 2.06 | 0.20 | -2.58 |
| IPI00018219 | Transforming growth factor-beta-induced protein ig-h3 precursor | K.NNVVSVNKEPVAEPDIM*ATNGVVHVITNVLQPPANRPQER.G | 4 | 6.33 | 0.49 | -4.19 |
| IPI00018219 | Transforming growth factor-beta-induced protein ig-h3 precursor | K.NNVVSVNKEPVAEPDIM*ATNGVVHVITNVLQPPANRPQER.G | 5 | 3.51 | 0.38 | -7.11 |
| IPI00018219 | Transforming growth factor-beta-induced protein ig-h3 precursor | K.SLQGDKLEVSLK.N                              | 2 | 3.36 | 0.25 | -2.68 |
| IPI00018219 | Transforming growth factor-beta-induced protein ig-h3 precursor | K.SPYQLVLQHSR.L                               | 2 | 3.89 | 0.40 | -2.70 |
| IPI00018219 | Transforming growth factor-beta-induced protein ig-h3 precursor | K.SPYQLVLQHSR.L                               | 3 | 3.69 | 0.34 | -3.35 |
| IPI00018219 | Transforming growth factor-beta-induced protein ig-h3 precursor | K.STVISYECPPGYEKVPGEK.G                       | 2 | 3.36 | 0.29 |       |
| IPI00018219 | Transforming growth factor-beta-induced protein ig-h3 precursor | K.TLFELAAESDVSTAILFR.Q                        | 2 | 4.70 | 0.48 | -6.21 |
| IPI00018219 | Transforming growth factor-beta-induced protein ig-h3 precursor | K.VISTITNNIQIIEIEDTFETLR.A                    | 2 | 5.88 | 0.50 | -2.97 |
| IPI00018219 | Transforming growth factor-beta-induced protein ig-h3 precursor | K.VISTITNNIQIIEIEDTFETLR.A                    | 3 | 5.81 | 0.46 | -8.15 |
| IPI00018219 | Transforming growth factor-beta-induced protein ig-h3 precursor | K.YHIGDEILVSGGIGALVR.L                        | 3 | 4.90 | 0.32 | -4.19 |
| IPI00018219 | Transforming growth factor-beta-induced protein ig-h3 precursor | K.YLYHGQTLETGGK.K                             | 2 | 3.91 | 0.40 | -2.93 |
| IPI00018219 | Transforming growth factor-beta-induced protein ig-h3 precursor | K.YLYHGQTLETGGK.L                             | 2 | 4.84 | 0.40 | -3.80 |
| IPI00018219 | Transforming growth factor-beta-induced protein ig-h3 precursor | R.AAVAASGLNTM*LEGNGQYTLAPTNEAFKIPSETLNR.I     | 3 | 6.08 | 0.54 | -4.79 |
| IPI00018219 | Transforming growth factor-beta-induced protein ig-h3 precursor | R.AAVAASGLNTM*LEGNGQYTLAPTNEAFKIPSETLNR.I     | 4 | 4.61 | 0.36 | -4.92 |
| IPI00018219 | Transforming growth factor-beta-induced protein ig-h3 precursor | R.EGVYTVFAPTNEAFR.A                           | 2 | 4.53 | 0.45 | -5.44 |
| IPI00018219 | Transforming growth factor-beta-induced protein ig-h3 precursor | R.FSM*LVAAIQSAGLTETLNR.E                      | 2 | 6.62 | 0.60 | -3.15 |
| IPI00018219 | Transforming growth factor-beta-induced protein ig-h3 precursor | R.FSM*LVAAIQSAGLTETLNR.E                      | 3 | 5.35 | 0.50 | -4.04 |

|             |                                                                 |                                        |   |      |      |       |
|-------------|-----------------------------------------------------------------|----------------------------------------|---|------|------|-------|
| IPI00018219 | Transforming growth factor-beta-induced protein ig-h3 precursor | R.GDELADSALEIFK.Q                      | 2 | 4.67 | 0.42 | -3.87 |
| IPI00018219 | Transforming growth factor-beta-induced protein ig-h3 precursor | R.ILGDPEALRDLLNNHILK.S                 | 2 | 3.11 | 0.30 | -4.32 |
| IPI00018219 | Transforming growth factor-beta-induced protein ig-h3 precursor | R.ILGDPEALRDLLNNHILK.S                 | 3 | 3.13 | 0.36 | -3.77 |
| IPI00018219 | Transforming growth factor-beta-induced protein ig-h3 precursor | R.LKSLQGDKLEVSLK.N                     | 2 | 4.63 | 0.40 | -3.60 |
| IPI00018219 | Transforming growth factor-beta-induced protein ig-h3 precursor | R.LKSLQGDKLEVSLK.N                     | 3 | 2.78 | 0.36 | -1.94 |
| IPI00018219 | Transforming growth factor-beta-induced protein ig-h3 precursor | R.LLGDAKELANILK.Y                      | 2 | 3.07 | 0.14 |       |
| IPI00018219 | Transforming growth factor-beta-induced protein ig-h3 precursor | R.LTLLAPLNSVFK.D                       | 1 | 2.70 | 0.35 | -4.18 |
| IPI00018219 | Transforming growth factor-beta-induced protein ig-h3 precursor | R.LTLLAPLNSVFK.D                       | 2 | 3.43 | 0.25 | -4.54 |
| IPI00018219 | Transforming growth factor-beta-induced protein ig-h3 precursor | R.LTLLAPLNSVFKDGTTPPIDAHR.N            | 3 | 3.39 | 0.41 | -2.14 |
| IPI00018219 | Transforming growth factor-beta-induced protein ig-h3 precursor | R.LTLLAPLNSVFKDGTTPPIDAHR.N            | 4 | 3.21 | 0.23 | -2.14 |
| IPI00018219 | Transforming growth factor-beta-induced protein ig-h3 precursor | R.NHIIKQLASK.Y                         | 2 | 2.78 | 0.23 | -3.59 |
| IPI00018219 | Transforming growth factor-beta-induced protein ig-h3 precursor | R.QAGLGNHLSGSER.L                      | 1 | 1.29 | 0.11 | -0.98 |
| IPI00018219 | Transforming growth factor-beta-induced protein ig-h3 precursor | R.VLTDELK.H                            | 2 | 2.30 | 0.12 | -3.92 |
| IPI00018219 | Transforming growth factor-beta-induced protein ig-h3 precursor | R.VLTPPM*GTVM*DVLK.G                   | 2 | 2.50 | 0.35 | -3.04 |
| IPI00018219 | Transforming growth factor-beta-induced protein ig-h3 precursor | R.VLTPPM*GTVM*DVLKGDNR.F               | 2 | 3.54 | 0.31 | -1.17 |
| IPI00018219 | Transforming growth factor-beta-induced protein ig-h3 precursor | R.VLTPPM*GTVM*DVLKGDNR.F               | 3 | 2.60 | 0.12 | -2.55 |
| IPI00018219 | Transforming growth factor-beta-induced protein ig-h3 precursor | R.YGTLFTM*DR.V                         | 2 | 3.31 | 0.27 | -2.95 |
| IPI00018236 | Ganglioside GM2 activator precursor                             | K.EGTYSLPK.S                           | 2 | 1.43 | 0.14 | -2.12 |
| IPI00018236 | Ganglioside GM2 activator precursor                             | K.EVAGLWIK.I                           | 1 | 2.40 | 0.17 | -2.10 |
| IPI00018236 | Ganglioside GM2 activator precursor                             | K.EVAGLWIK.I                           | 2 | 2.50 | 0.19 | -2.42 |
| IPI00018236 | Ganglioside GM2 activator precursor                             | K.IAASLKGI.-                           | 1 | 1.53 | 0.11 | -3.25 |
| IPI00018236 | Ganglioside GM2 activator precursor                             | K.IPCTDYIGSCTFEHFCDVLDM*LIPTGEPCEPLR.T | 3 | 5.98 | 0.59 | -3.92 |
| IPI00018236 | Ganglioside GM2 activator precursor                             | K.IPCTDYIGSCTFEHFCDVLDM*LIPTGEPCEPLR.T | 4 | 3.97 | 0.42 | -4.38 |
| IPI00018236 | Ganglioside GM2 activator precursor                             | K.IPCTDYIGSCTFEHFCDVLDM*LIPTGEPCEPLR.T | 5 | 2.28 | 0.20 | -3.22 |
| IPI00018236 | Ganglioside GM2 activator precursor                             | K.KPSQLSSFSDWNCDEGKDPVIR.S             | 4 | 3.63 | 0.30 | -3.09 |

|             |                                                         |                               |   |      |      |       |
|-------------|---------------------------------------------------------|-------------------------------|---|------|------|-------|
| IPI00018236 | Ganglioside GM2 activator precursor                     | K.PSQLSSFSWDNCDEGKDPVIR.S     | 3 | 3.87 | 0.37 | -3.19 |
| IPI00018236 | Ganglioside GM2 activator precursor                     | K.SEFVVPDLELPSWLTTGNR.I       | 2 | 5.44 | 0.59 | -5.02 |
| IPI00018236 | Ganglioside GM2 activator precursor                     | K.SEFVVPDLELPSWLTTGNR.I       | 3 | 4.99 | 0.53 | -4.69 |
| IPI00018236 | Ganglioside GM2 activator precursor                     | K.VDLVLEK.E                   | 2 | 2.69 | 0.13 | -3.46 |
| IPI00018236 | Ganglioside GM2 activator precursor                     | K.VDLVLEKEVAGLWIK.I           | 2 | 3.43 | 0.31 | -1.54 |
| IPI00018236 | Ganglioside GM2 activator precursor                     | K.VDLVLEKEVAGLWIK.I           | 3 | 4.18 | 0.32 | -0.86 |
| IPI00018236 | Ganglioside GM2 activator precursor                     | R.IESVLSSSGK.R                | 1 | 2.36 | 0.14 | -3.73 |
| IPI00018236 | Ganglioside GM2 activator precursor                     | R.IESVLSSSGK.R                | 2 | 3.41 | 0.26 | -1.53 |
| IPI00018236 | Ganglioside GM2 activator precursor                     | R.IESVLSSSGKR.L               | 1 | 2.60 | 0.32 | -4.05 |
| IPI00018236 | Ganglioside GM2 activator precursor                     | R.IESVLSSSGKR.L               | 2 | 3.39 | 0.24 | -5.17 |
| IPI00018236 | Ganglioside GM2 activator precursor                     | R.TYGLPCHCPF.K.E              | 2 | 2.53 | 0.36 | -0.83 |
| IPI00018246 | Isoform 1 of Hexokinase-1                               | K.FLSQIESDRLALLQVR.A          | 3 | 3.11 | 0.30 | -2.75 |
| IPI00018246 | Isoform 1 of Hexokinase-1                               | R.SANLVAATLGAILNR.L           | 2 | 4.12 | 0.15 | -5.03 |
| IPI00018246 | Isoform 1 of Hexokinase-1                               | R.SANLVAATLGAILNR.L           | 3 | 4.67 | 0.21 | -2.97 |
| IPI00018274 | Isoform 1 of Epidermal growth factor receptor precursor | K.LTQLGTFEDHFLSLQR.M          | 2 | 4.41 | 0.48 | -2.06 |
| IPI00018274 | Isoform 1 of Epidermal growth factor receptor precursor | K.LTQLGTFEDHFLSLQR.M          | 3 | 2.99 | 0.29 | -1.87 |
| IPI00018274 | Isoform 1 of Epidermal growth factor receptor precursor | K.TIQEVAGYVLIALNTVER.I        | 2 | 4.17 | 0.31 | -2.79 |
| IPI00018274 | Isoform 1 of Epidermal growth factor receptor precursor | K.TIQEVAGYVLIALNTVER.I        | 3 | 4.33 | 0.23 | -2.27 |
| IPI00018274 | Isoform 1 of Epidermal growth factor receptor precursor | R.FSNNPALCNVESIQWR.D          | 2 | 4.57 | 0.44 | -3.98 |
| IPI00018274 | Isoform 1 of Epidermal growth factor receptor precursor | R.GDSFTHTPPLDPQELDILK.T       | 3 | 4.14 | 0.19 | -2.11 |
| IPI00018274 | Isoform 1 of Epidermal growth factor receptor precursor | R.NLQEILHGAVR.F               | 2 | 2.96 | 0.26 | -4.51 |
| IPI00018275 | Prion-like protein doppel precursor                     | R.LVQELCSLK.H                 | 2 | 2.34 | 0.22 | -0.57 |
| IPI00018305 | Insulin-like growth factor-binding protein 3 precursor  | A.GASSAGLGPVVR.C              | 2 | 3.40 | 0.39 | -1.51 |
| IPI00018305 | Insulin-like growth factor-binding protein 3 precursor  | K.FLNVLSPR.G                  | 2 | 2.63 | 0.15 | -1.86 |
| IPI00018305 | Insulin-like growth factor-binding protein 3 precursor  | K.YGQPLPGYTTK.G               | 2 | 2.13 | 0.15 | -2.79 |
| IPI00018305 | Insulin-like growth factor-binding protein 3 precursor  | R.ALAQCAPPAVCAELVR.E          | 3 | 3.57 | 0.33 | -2.64 |
| IPI00018305 | Insulin-like growth factor-binding protein 3 precursor  | R.SAGSVESPSVSSTHR.V           | 2 | 2.78 | 0.27 | -5.24 |
| IPI00018311 | Isoform 2 of Neuroplastin precursor                     | K.NGVLSATR.K                  | 2 | 3.02 | 0.34 | -1.46 |
| IPI00018342 | Adenylate kinase isoenzyme 1                            | K.YGYTHLSTGDLR.S              | 3 | 2.35 | 0.22 | -1.01 |
| IPI00018352 | Ubiquitin carboxyl-terminal hydrolase isozyme L1        | R.VDDKVNHFHILFNNVDGHLVELDGR.M | 4 | 2.80 | 0.13 | -2.50 |

|             |                                                   |                                   |   |      |      |       |
|-------------|---------------------------------------------------|-----------------------------------|---|------|------|-------|
| IPI00018381 | Isoform 1 of Tolloid-like protein 1 precursor     | K.FCGAEVPEVITSQFNNMRIEFKSDNTVSK.K | 3 | 4.00 | 0.12 |       |
| IPI00018381 | Isoform 1 of Tolloid-like protein 1 precursor     | K.GKVPLQFSGQNEK.N                 | 2 | 3.72 | 0.30 | -1.94 |
| IPI00018381 | Isoform 1 of Tolloid-like protein 1 precursor     | K.GKVPLQFSGQNEK.N                 | 3 | 3.81 | 0.24 | -3.32 |
| IPI00018381 | Isoform 1 of Tolloid-like protein 1 precursor     | K.VPLQFSGQNEK.N                   | 2 | 2.95 | 0.11 | -1.46 |
| IPI00018387 | Furin precursor                                   | R.ESPPQQPPRLPPEVEAGQR.L           | 3 | 2.50 | 0.12 | -1.63 |
| IPI00018396 | Cerebellin-4 precursor                            | K.CLVVCDSNPATDSK.G                | 2 | 4.26 | 0.43 | -3.66 |
| IPI00018396 | Cerebellin-4 precursor                            | K.CLVVCDSNPATDSKGSSSSPLGISVR.A    | 3 | 4.52 | 0.48 | -4.40 |
| IPI00018396 | Cerebellin-4 precursor                            | K.GSSSSPLGISVR.A                  | 1 | 2.21 | 0.38 | -3.84 |
| IPI00018396 | Cerebellin-4 precursor                            | K.GSSSSPLGISVR.A                  | 2 | 3.79 | 0.38 | -1.91 |
| IPI00018429 | Paired mesoderm homeobox protein 2                | R.KNFSVSHLLDLEEVAAAGRLAARPGAR.A   | 3 | 3.11 | 0.17 |       |
| IPI00018534 | Histone H2B type 1-L                              | K.AM*GIM*NSFVNDIFER.I             | 2 | 4.45 | 0.47 | -5.10 |
| IPI00018534 | Histone H2B type 1-L                              | K.AMGIMNSFVNDIFER.I               | 2 | 4.14 | 0.47 | -3.32 |
| IPI00018534 | Histone H2B type 1-L                              | K.AQKKDGKKR.K                     | 2 | 2.40 | 0.14 | -2.43 |
| IPI00018534 | Histone H2B type 1-L                              | R.LLLPGELAK.H                     | 2 | 2.25 | 0.08 | -2.29 |
| IPI00018534 | Histone H2B type 1-L                              | R.SRKESYSVYVYKVLK.Q               | 3 | 3.27 | 0.34 | -2.25 |
| IPI00018534 | Histone H2B type 1-L                              | R.SRKESYSVYVYKVLK.Q               | 4 | 3.14 | 0.17 | -2.98 |
| IPI00018534 | Histone H2B type 1-L                              | R.SRKESYSVYVYKVLKQVHPDGTGISSK.A   | 5 | 3.64 | 0.29 | -4.59 |
| IPI00018708 | Isoform 2 of Centrosomal protein of 63 kDa        | K.LENRHLSEM*VMK.L                 | 2 | 1.50 | 0.11 | -3.64 |
| IPI00018755 | High mobility group protein 1-like 10             | K.IKGEHPGLSIGDVAK.K               | 2 | 3.29 | 0.41 | -3.40 |
| IPI00018769 | Thrombospondin-2 precursor                        | K.DKTHNCHKHAECIYLGHFSDPMYK.C      | 3 | 2.79 | 0.10 | 0.68  |
| IPI00018769 | Thrombospondin-2 precursor                        | K.DYTAYR.W                        | 1 | 1.52 | 0.19 | -1.61 |
| IPI00018769 | Thrombospondin-2 precursor                        | K.QVM*ADSGPIYDQTYAGGR.L           | 2 | 5.52 | 0.55 | -3.67 |
| IPI00018769 | Thrombospondin-2 precursor                        | R.AYGYSVSLK.V                     | 2 | 2.83 | 0.29 | -2.42 |
| IPI00018769 | Thrombospondin-2 precursor                        | R.FDYIPPVNADDLSK.I                | 2 | 2.30 | 0.09 | -2.46 |
| IPI00018769 | Thrombospondin-2 precursor                        | R.GNQPVGVGLEAAK.T                 | 2 | 2.22 | 0.22 | -1.57 |
| IPI00018769 | Thrombospondin-2 precursor                        | R.LCNVPVPM*GGK.N                  | 2 | 2.77 | 0.34 | -3.07 |
| IPI00018769 | Thrombospondin-2 precursor                        | R.NFQM*VPLDPK.G                   | 2 | 3.07 | 0.28 | -2.99 |
| IPI00018769 | Thrombospondin-2 precursor                        | R.YRGNQPVGVGLEAAK.T               | 2 | 4.02 | 0.38 | -1.91 |
| IPI00018803 | homeobox D12                                      | L.QPPTAKDGPEEQAK.F                | 1 | 1.92 | 0.23 | -0.44 |
| IPI00018843 | Isoform 1 of D(3) dopamine receptor               | K.LSNGRLSTSLKLGPLQPRGVPLR.E       | 2 | 1.23 | 0.17 | 1.68  |
| IPI00018860 | NKG2D ligand 2 precursor                          | R.DIQLENYTPK.E                    | 2 | 2.71 | 0.20 | -4.51 |
| IPI00018860 | NKG2D ligand 2 precursor                          | R.DIQLENYTPKEPLTLQAR.M            | 2 | 4.52 | 0.39 | -2.18 |
| IPI00018860 | NKG2D ligand 2 precursor                          | R.DIQLENYTPKEPLTLQAR.M            | 3 | 4.39 | 0.27 | -4.27 |
| IPI00018860 | NKG2D ligand 2 precursor                          | R.EVVDILTEQLR.D                   | 2 | 4.32 | 0.35 | -2.57 |
| IPI00018879 | Alpha-L-iduronidase precursor                     | R.ALDYWARPFPFSDVPYLEVVPVR.G       | 3 | 5.21 | 0.44 | -3.35 |
| IPI00018879 | Alpha-L-iduronidase precursor                     | R.KPSTFNLFVFPDGTGAVSGSYR.V        | 3 | 3.51 | 0.26 | -2.95 |
| IPI00018909 | trefoil factor 3 precursor                        | R.IPGVPWCFFKPLQEAECTF.-           | 2 | 3.86 | 0.38 | -6.79 |
| IPI00018914 | Tyrosine-protein phosphatase non-receptor type 14 | R.YQYYLQVKKDVLEGR.L               | 3 | 2.60 | 0.10 | -3.52 |
| IPI00018941 | Calcitonin gene-related peptide 2 precursor       | K.ASELKQEQTQGSSAAQ.K              | 2 | 5.68 | 0.58 | -7.24 |
| IPI00018941 | Calcitonin gene-related peptide 2 precursor       | K.ASELKQEQTQGSSAAQKR.A            | 4 | 3.38 | 0.20 | -1.72 |
| IPI00018941 | Calcitonin gene-related peptide 2 precursor       | R.LLLAALVQDYVQM*K.A               | 2 | 4.72 | 0.45 | -3.61 |

|             |                                                               |                                         |   |      |      |       |
|-------------|---------------------------------------------------------------|-----------------------------------------|---|------|------|-------|
| IPI00018941 | Calcitonin gene-related peptide 2 precursor                   | R.LLLAALVQDYVQM*K.A                     | 3 | 5.28 | 0.48 | -4.39 |
| IPI00018980 | Sodium channel subunit beta-1 precursor                       | R.YENEVLQLEEDERFEGR.V                   | 3 | 2.61 | 0.20 | -2.91 |
| IPI00019038 | Lysozyme C precursor                                          | K.TPGAVNACHLSCSALLQDNIADAVACAK.R        | 2 | 4.44 | 0.50 |       |
| IPI00019038 | Lysozyme C precursor                                          | K.TPGAVNACHLSCSALLQDNIADAVACAK.R        | 3 | 4.56 | 0.17 |       |
| IPI00019038 | Lysozyme C precursor                                          | R.ATNYNAGDRSTDYGFQINSR.Y                | 2 | 4.69 | 0.37 |       |
| IPI00019038 | Lysozyme C precursor                                          | R.ATNYNAGDRSTDYGFQINSR.Y                | 3 | 2.32 | 0.24 |       |
| IPI00019038 | Lysozyme C precursor                                          | R.GISLANWM*CLAK.W                       | 2 | 3.55 | 0.38 |       |
| IPI00019038 | Lysozyme C precursor                                          | R.GISLANWMCLAK.W                        | 2 | 1.98 | 0.19 |       |
| IPI00019038 | Lysozyme C precursor                                          | R.LGM*DGYSR.G                           | 2 | 2.25 | 0.10 |       |
| IPI00019038 | Lysozyme C precursor                                          | R.STDYGFQINSR.Y                         | 2 | 4.53 | 0.34 |       |
| IPI00019038 | Lysozyme C precursor                                          | R.YWCNDGKTPGAVNACHLSCSALLQDNIADAVACAK.R | 3 | 5.61 | 0.47 |       |
| IPI00019146 | Isoform 1 of Coxsackievirus and adenovirus receptor precursor | K.FTLSPEDQGPLDIEWLISPADNQG.V            | 3 | 2.55 | 0.11 | -3.47 |
| IPI00019157 | Chondroitin sulfate proteoglycan 4 precursor                  | K.DLLFGSIVAVDEPTRPIYR.F                 | 3 | 2.83 | 0.15 | -2.87 |
| IPI00019157 | Chondroitin sulfate proteoglycan 4 precursor                  | K.SPPSAGYLVV*VSR.G                      | 2 | 3.15 | 0.29 | -0.75 |
| IPI00019157 | Chondroitin sulfate proteoglycan 4 precursor                  | K.SQVLFVTR.G                            | 2 | 2.80 | 0.11 | -2.48 |
| IPI00019157 | Chondroitin sulfate proteoglycan 4 precursor                  | R.APLEVPPQALGR.S                        | 2 | 2.86 | 0.35 | -2.64 |
| IPI00019157 | Chondroitin sulfate proteoglycan 4 precursor                  | R.ASSSAGTDPQLLYR.V                      | 2 | 3.80 | 0.36 | -3.96 |
| IPI00019157 | Chondroitin sulfate proteoglycan 4 precursor                  | R.DQLEAAQEAVPPADIVFSVK.S                | 2 | 4.10 | 0.50 | -2.06 |
| IPI00019157 | Chondroitin sulfate proteoglycan 4 precursor                  | R.DQPGEPATEFSCR.E                       | 2 | 2.11 | 0.05 | -2.63 |
| IPI00019157 | Chondroitin sulfate proteoglycan 4 precursor                  | R.DVNERPPQPQASVPLR.L                    | 3 | 2.50 | 0.22 | -2.12 |
| IPI00019157 | Chondroitin sulfate proteoglycan 4 precursor                  | R.ELEAGSLVYVHR.G                        | 3 | 1.90 | 0.14 | -1.82 |
| IPI00019157 | Chondroitin sulfate proteoglycan 4 precursor                  | R.FTQADVDSGR.L                          | 2 | 2.56 | 0.26 | 0.48  |
| IPI00019157 | Chondroitin sulfate proteoglycan 4 precursor                  | R.GSLLLGGDLAEASR.H                      | 2 | 3.86 | 0.36 | -4.07 |
| IPI00019157 | Chondroitin sulfate proteoglycan 4 precursor                  | R.GVLSYLEPR.G                           | 2 | 2.80 | 0.12 | -0.31 |
| IPI00019157 | Chondroitin sulfate proteoglycan 4 precursor                  | R.LEISVDQYPTHTSNR.G                     | 2 | 4.12 | 0.50 | -1.97 |
| IPI00019157 | Chondroitin sulfate proteoglycan 4 precursor                  | R.LEISVDQYPTHTSNR.G                     | 3 | 2.72 | 0.15 | -1.97 |
| IPI00019157 | Chondroitin sulfate proteoglycan 4 precursor                  | R.LSDGEHTSPGHFFR.V                      | 2 | 3.39 | 0.20 | -3.95 |
| IPI00019157 | Chondroitin sulfate proteoglycan 4 precursor                  | R.LSDGQGFTQDDIQAGR.V                    | 2 | 3.26 | 0.37 | -2.60 |
| IPI00019157 | Chondroitin sulfate proteoglycan 4 precursor                  | R.QAPLAFQAGGR.R                         | 2 | 2.08 | 0.28 | -1.92 |
| IPI00019157 | Chondroitin sulfate proteoglycan 4 precursor                  | R.SGDEVHYHVTAGPR.W                      | 2 | 4.29 | 0.46 | -3.85 |
| IPI00019157 | Chondroitin sulfate proteoglycan 4 precursor                  | R.SGDEVHYHVTAGPR.W                      | 3 | 2.75 | 0.25 | -1.70 |
| IPI00019157 | Chondroitin sulfate proteoglycan 4 precursor                  | R.STDGDGSGSEDLVYTIEQPSNGR.V             | 2 | 3.85 | 0.41 | -4.05 |
| IPI00019157 | Chondroitin sulfate proteoglycan 4 precursor                  | R.VAIQPVNDHAPVQTISR.I                   | 2 | 3.01 | 0.37 | -3.87 |
| IPI00019157 | Chondroitin sulfate proteoglycan 4 precursor                  | R.VSGPYFPTLLGLSLQVLEPPQHGHALQKEDGPQAR.T | 4 | 4.02 | 0.33 | -1.81 |
| IPI00019157 | Chondroitin sulfate proteoglycan 4 precursor                  | R.VTGALQFGELQK.Q                        | 2 | 4.22 | 0.39 | -4.68 |
| IPI00019158 | ADAM metallopeptidase domain 8 precursor                      | K.QVIKPTFAPPVPPVKPGAGAANPGPAEAGAVGPK.V  | 3 | 2.98 | 0.17 |       |
| IPI00019176 | Retinoic acid receptor responder protein 2 precursor          | K.LGSEDKVLGR.L                          | 2 | 3.90 | 0.19 | -2.41 |
| IPI00019176 | Retinoic acid receptor responder protein 2 precursor          | R.AGEDPHSFYFPGQFAFSK.A                  | 3 | 3.71 | 0.40 | -3.03 |

|             |                                                                                       |                                   |   |      |      |       |
|-------------|---------------------------------------------------------------------------------------|-----------------------------------|---|------|------|-------|
| IPI00019176 | Retinoic acid receptor responder protein 2 precursor                                  | R.GLQVALEEFHK.H                   | 3 | 2.07 | 0.13 | -3.18 |
| IPI00019180 | Glypican-5 precursor                                                                  | K.VKGIDPVINQIIDKLLK.H             | 3 | 3.24 | 0.30 | -3.29 |
| IPI00019180 | Glypican-5 precursor                                                                  | K.VKGIDPVINQIIDKLLK.H             | 4 | 3.10 | 0.30 | -3.11 |
| IPI00019180 | Glypican-5 precursor                                                                  | R.NAAAFQETLETLIK.Q                | 2 | 4.21 | 0.35 | -4.08 |
| IPI00019190 | Myocilin precursor                                                                    | R.IDTVGTDVVR.Q                    | 2 | 2.17 | 0.21 | -3.08 |
| IPI00019190 | Myocilin precursor                                                                    | R.ILKESPSGYLR.S                   | 2 | 2.24 | 0.08 | -3.57 |
| IPI00019190 | Myocilin precursor                                                                    | R.LRQENENLAR.R                    | 2 | 3.04 | 0.17 | -1.05 |
| IPI00019190 | Myocilin precursor                                                                    | R.RLESSSQEVAR.L                   | 2 | 3.02 | 0.22 | -0.99 |
| IPI00019190 | Myocilin precursor                                                                    | R.TAETITGK.Y                      | 2 | 1.69 | 0.13 | -2.09 |
| IPI00019208 | Similar to 60S ribosomal protein L29                                                  | K.HNKKGLKMK*QANNAK.A              | 2 | 3.83 | 0.11 |       |
| IPI00019209 | Semaphorin-3C precursor                                                               | K.TSEYFSLSHHPLDYR.I               | 4 | 2.68 | 0.18 | -2.84 |
| IPI00019209 | Semaphorin-3C precursor                                                               | R.ILLM*DEDQDR.I                   | 2 | 1.71 | 0.16 | -1.24 |
| IPI00019209 | Semaphorin-3C precursor                                                               | R.VYLTFDEL.R.E                    | 2 | 3.03 | 0.30 | -3.78 |
| IPI00019209 | Semaphorin-3C precursor                                                               | R.YHVFLFGTDR.G                    | 2 | 2.04 | 0.10 | -2.20 |
| IPI00019242 | Matrix metalloproteinase-15 precursor                                                 | R.VVVQM*EEVAR.T                   | 2 | 2.22 | 0.11 | -1.38 |
| IPI00019359 | Keratin, type I cytoskeletal 9                                                        | K.DIENQYETQITQIEHEVSSSGQEVQSSAK.E | 3 | 4.27 | 0.25 |       |
| IPI00019359 | Keratin, type I cytoskeletal 9                                                        | K.NYSPYNTIDDLKDQIVDLTVGNK.T       | 3 | 5.07 | 0.45 |       |
| IPI00019359 | Keratin, type I cytoskeletal 9                                                        | R.FSSSSGYGGGSSR.V                 | 2 | 3.35 | 0.39 | -0.91 |
| IPI00019359 | Keratin, type I cytoskeletal 9                                                        | R.GGSGGSYGGGGSGGGYGGGSGSR.G       | 2 | 5.66 | 0.46 | -3.87 |
| IPI00019372 | Serglycin precursor                                                                   | K.GPM*FELLPGESNKIPR.L             | 3 | 3.27 | 0.32 | -3.32 |
| IPI00019399 | Serum amyloid A-4 protein precursor                                                   | K.EALQGVGDMGR.A                   | 2 | 3.30 | 0.27 |       |
| IPI00019399 | Serum amyloid A-4 protein precursor                                                   | R.AYWDIM*ISNHQNSNR.Y              | 2 | 3.82 | 0.38 |       |
| IPI00019399 | Serum amyloid A-4 protein precursor                                                   | R.AYWDIMISNHQNSNR.Y               | 2 | 4.20 | 0.41 |       |
| IPI00019399 | Serum amyloid A-4 protein precursor                                                   | R.GNYDAAQRGPGGVWAAK.L             | 2 | 3.93 | 0.10 |       |
| IPI00019399 | Serum amyloid A-4 protein precursor                                                   | R.GNYDAAQRGPGGVWAAK.L             | 3 | 2.86 | 0.20 |       |
| IPI00019399 | Serum amyloid A-4 protein precursor                                                   | R.SFFKEALQGVGDM*GR.A              | 2 | 4.23 | 0.41 |       |
| IPI00019399 | Serum amyloid A-4 protein precursor                                                   | R.VYLQGLIDYYLFGNSSTVLEDSK.S       | 2 | 6.04 | 0.50 |       |
| IPI00019399 | Serum amyloid A-4 protein precursor                                                   | R.VYLQGLIDYYLFGNSSTVLEDSK.S       | 3 | 5.93 | 0.50 |       |
| IPI00019399 | Serum amyloid A-4 protein precursor                                                   | R.VYLQGLIDYYLFGNSSTVLEDSKSNEK.A   | 3 | 4.46 | 0.22 |       |
| IPI00019449 | Non-secretory ribonuclease precursor                                                  | R.DPPQYPVVPVHLDR.I                | 3 | 2.89 | 0.43 | -2.19 |
| IPI00019449 | Non-secretory ribonuclease precursor                                                  | R.RDPPQYPVVPVHLDR.I               | 2 | 2.58 | 0.17 | -3.08 |
| IPI00019449 | Non-secretory ribonuclease precursor                                                  | R.RDPPQYPVVPVHLDR.I               | 3 | 4.49 | 0.31 | -3.31 |
| IPI00019449 | Non-secretory ribonuclease precursor                                                  | R.RDPPQYPVVPVHLDR.I               | 4 | 2.33 | 0.22 | -1.97 |
| IPI00019449 | Non-secretory ribonuclease precursor                                                  | R.YAQTANM*FYIVACDNR.D             | 2 | 4.85 | 0.53 | -1.93 |
| IPI00019485 | Isoform 2 of Enoyl-CoA hydratase domain-containing protein 2, mitochondrial precursor | R.GTEVDIASGMAIEGMCYAQNIPTR.D      | 3 | 5.13 | 0.12 |       |
| IPI00019501 | Ephrin-B3 precursor                                                                   | K.LYLVGGAQGR.R                    | 2 | 3.45 | 0.28 | -0.90 |
| IPI00019501 | Ephrin-B3 precursor                                                                   | R.FQAEGGYVLYPQIGDRDLDCPR.A        | 3 | 4.43 | 0.45 | -1.05 |
| IPI00019501 | Ephrin-B3 precursor                                                                   | R.KPVSEM*PM*ER.D                  | 2 | 2.56 | 0.32 | -1.17 |
| IPI00019501 | Ephrin-B3 precursor                                                                   | R.SHHDYIIATSDGTR.E                | 3 | 3.08 | 0.06 | -3.94 |
| IPI00019502 | Myosin-9                                                                              | K.LQVELDNVTGLLSQSDSK.S            | 2 | 5.67 | 0.57 | -4.52 |



|             |                                                  |                            |   |      |      |       |
|-------------|--------------------------------------------------|----------------------------|---|------|------|-------|
| IPI00019502 | Myosin-9                                         | K.SMEAEMIQLEELAAAER.A      | 2 | 3.75 | 0.35 | -1.25 |
| IPI00019502 | Myosin-9                                         | R.IAEFTTNLTEEEK.S          | 2 | 4.34 | 0.40 | -1.51 |
| IPI00019502 | Myosin-9                                         | R.IAQLLEEEEEEQGNTELINDR.L  | 2 | 5.34 | 0.49 | -2.00 |
| IPI00019502 | Myosin-9                                         | R.IAQLLEEEEEEQGNTELINDR.L  | 3 | 4.82 | 0.47 | -1.79 |
| IPI00019502 | Myosin-9                                         | R.LTEMETLQSQLMAEK.L        | 2 | 3.43 | 0.24 | -4.94 |
| IPI00019502 | Myosin-9                                         | R.NTDQASM*PDNTAAQK.V       | 2 | 2.86 | 0.37 | -3.01 |
| IPI00019530 | Tyrosine-protein kinase receptor Tie-1 precursor | K.AIVEPEKTTAEFEVPR.L       | 2 | 3.31 | 0.41 | -1.56 |
| IPI00019530 | Tyrosine-protein kinase receptor Tie-1 precursor | K.AIVEPEKTTAEFEVPR.L       | 3 | 3.74 | 0.33 | -2.14 |
| IPI00019533 | Chitinase-3-like protein 2 precursor             | K.DKSEVM*LYQTINSLK.T       | 2 | 3.74 | 0.37 | -1.41 |
| IPI00019533 | Chitinase-3-like protein 2 precursor             | K.DKSEVM*LYQTINSLK.T       | 3 | 4.22 | 0.33 | -1.38 |
| IPI00019533 | Chitinase-3-like protein 2 precursor             | K.ENTHFTVLIHELAEAFQK.D     | 3 | 2.02 | 0.17 | -3.10 |
| IPI00019533 | Chitinase-3-like protein 2 precursor             | K.GNQWVGYYDDVK.S           | 2 | 2.83 | 0.27 | -2.72 |
| IPI00019533 | Chitinase-3-like protein 2 precursor             | K.SCNQGPYPLVQAVK.R         | 2 | 4.42 | 0.43 | -2.24 |
| IPI00019533 | Chitinase-3-like protein 2 precursor             | R.LQDQQVPYAVK.G            | 2 | 3.79 | 0.30 | -3.26 |
| IPI00019568 | Prothrombin precursor (Fragment)                 | K.ETWTANVGK.G              | 1 | 1.90 | 0.19 | -3.33 |
| IPI00019568 | Prothrombin precursor (Fragment)                 | K.HQDFNSAVQLVENFCR.N       | 2 | 5.78 | 0.62 | -5.34 |
| IPI00019568 | Prothrombin precursor (Fragment)                 | K.HQDFNSAVQLVENFCR.N       | 3 | 2.88 | 0.17 | -3.59 |
| IPI00019568 | Prothrombin precursor (Fragment)                 | K.KSLEDKTERELLESYIDGR.I    | 3 | 3.45 | 0.38 | -3.60 |
| IPI00019568 | Prothrombin precursor (Fragment)                 | K.KSLEDKTERELLESYIDGR.I    | 4 | 3.16 | 0.21 | -3.29 |
| IPI00019568 | Prothrombin precursor (Fragment)                 | K.SLEDKTER.E               | 2 | 2.45 | 0.18 | -2.11 |
| IPI00019568 | Prothrombin precursor (Fragment)                 | K.SLEDKTERELLESYIDGR.I     | 2 | 3.79 | 0.46 | -4.15 |
| IPI00019568 | Prothrombin precursor (Fragment)                 | K.SLEDKTERELLESYIDGR.I     | 3 | 3.85 | 0.40 | -4.39 |
| IPI00019568 | Prothrombin precursor (Fragment)                 | K.SPQELLCGASLISDR.W        | 2 | 5.15 | 0.54 | -1.87 |
| IPI00019568 | Prothrombin precursor (Fragment)                 | K.SPQELLCGASLISDR.W        | 3 | 2.67 | 0.23 | -1.60 |
| IPI00019568 | Prothrombin precursor (Fragment)                 | K.TERELLESYIDGR.I          | 2 | 2.93 | 0.35 | -3.21 |
| IPI00019568 | Prothrombin precursor (Fragment)                 | K.TERELLESYIDGR.I          | 3 | 3.08 | 0.20 | -2.24 |
| IPI00019568 | Prothrombin precursor (Fragment)                 | K.VIDQFGE.-                | 1 | 1.63 | 0.14 | -3.57 |
| IPI00019568 | Prothrombin precursor (Fragment)                 | K.YGFYTHVFR.L              | 1 | 2.22 | 0.22 | -3.01 |
| IPI00019568 | Prothrombin precursor (Fragment)                 | K.YGFYTHVFR.L              | 2 | 3.68 | 0.47 | -2.52 |
| IPI00019568 | Prothrombin precursor (Fragment)                 | K.YTACETAR.T               | 2 | 2.76 | 0.32 | -2.85 |
| IPI00019568 | Prothrombin precursor (Fragment)                 | R.DGKYGFYTHVFR.L           | 2 | 3.58 | 0.49 | -2.81 |
| IPI00019568 | Prothrombin precursor (Fragment)                 | R.DGKYGFYTHVFR.L           | 3 | 2.98 | 0.21 | -2.65 |
| IPI00019568 | Prothrombin precursor (Fragment)                 | R.DKLAACLEGNCAEGLGTNYR.G   | 3 | 4.50 | 0.49 | -2.49 |
| IPI00019568 | Prothrombin precursor (Fragment)                 | R.ELLESYIDGR.I             | 1 | 2.72 | 0.18 | -2.39 |
| IPI00019568 | Prothrombin precursor (Fragment)                 | R.ELLESYIDGR.I             | 2 | 3.74 | 0.37 | -6.28 |
| IPI00019568 | Prothrombin precursor (Fragment)                 | R.ENLDRDIALM*K.L           | 1 | 2.03 | 0.33 | -0.09 |
| IPI00019568 | Prothrombin precursor (Fragment)                 | R.ENLDRDIALM*K.L           | 2 | 2.93 | 0.21 | -2.27 |
| IPI00019568 | Prothrombin precursor (Fragment)                 | R.ENLDRDIALM*K.L           | 3 | 2.55 | 0.22 | -2.53 |
| IPI00019568 | Prothrombin precursor (Fragment)                 | R.ETAASLLQAGYK.G           | 1 | 3.60 | 0.43 | -3.23 |
| IPI00019568 | Prothrombin precursor (Fragment)                 | R.ETAASLLQAGYK.G           | 2 | 4.19 | 0.44 | -2.74 |
| IPI00019568 | Prothrombin precursor (Fragment)                 | R.GDACEGDSSGPFVM*K.S       | 2 | 4.12 | 0.51 | -4.22 |
| IPI00019568 | Prothrombin precursor (Fragment)                 | R.IVEGSDAEIGM*SPWQVM*LFR.K | 2 | 6.22 | 0.57 | -5.02 |

|             |                                  |                                       |   |      |      |       |
|-------------|----------------------------------|---------------------------------------|---|------|------|-------|
| IPI00019568 | Prothrombin precursor (Fragment) | R.IVEGSDAEIGM*SPWQVM*LFR.K            | 3 | 5.78 | 0.52 | -4.56 |
| IPI00019568 | Prothrombin precursor (Fragment) | R.KSPQELLCGASLISDR.W                  | 2 | 5.04 | 0.54 | -2.77 |
| IPI00019568 | Prothrombin precursor (Fragment) | R.KSPQELLCGASLISDR.W                  | 3 | 3.83 | 0.42 | -2.59 |
| IPI00019568 | Prothrombin precursor (Fragment) | R.LAVTTHGLPCLAWASQAQ.A                | 2 | 5.35 | 0.59 | -3.19 |
| IPI00019568 | Prothrombin precursor (Fragment) | R.LAVTTHGLPCLAWASQAQ.A                | 3 | 5.17 | 0.46 | -3.86 |
| IPI00019568 | Prothrombin precursor (Fragment) | R.NPDSSTTGPWCYTDDPTVR.R               | 2 | 5.47 | 0.62 | -4.86 |
| IPI00019568 | Prothrombin precursor (Fragment) | R.NPDSSTTGPWCYTDDPTVR.R               | 3 | 4.29 | 0.43 | -5.36 |
| IPI00019568 | Prothrombin precursor (Fragment) | R.QECSIPVCGQDQVTVAM*TPR.S             | 2 | 4.66 | 0.54 | -3.45 |
| IPI00019568 | Prothrombin precursor (Fragment) | R.RQECSIPVCGQDQVTVAM*TPR.S            | 3 | 5.62 | 0.50 | -3.85 |
| IPI00019568 | Prothrombin precursor (Fragment) | R.RQECSIPVCGQDQVTVAMTPR.S             | 3 | 3.84 | 0.26 |       |
| IPI00019568 | Prothrombin precursor (Fragment) | R.SEGSSVNLSPPLEQCVPDR.G               | 2 | 4.04 | 0.32 | -5.53 |
| IPI00019568 | Prothrombin precursor (Fragment) | R.SEGSSVNLSPPLEQCVPDR.G               | 3 | 3.15 | 0.18 | -3.60 |
| IPI00019568 | Prothrombin precursor (Fragment) | R.SEGSSVNLSPPLEQCVPDRGQQYQGR.L        | 2 | 2.23 | 0.29 | -1.95 |
| IPI00019568 | Prothrombin precursor (Fragment) | R.SEGSSVNLSPPLEQCVPDRGQQYQGR.L        | 3 | 3.64 | 0.37 | -3.96 |
| IPI00019568 | Prothrombin precursor (Fragment) | R.SEGSSVNLSPPLEQCVPDRGQQYQGR.L        | 4 | 3.49 | 0.24 | -1.99 |
| IPI00019568 | Prothrombin precursor (Fragment) | R.SGIECQLWR.S                         | 1 | 2.04 | 0.13 | -3.56 |
| IPI00019568 | Prothrombin precursor (Fragment) | R.SGIECQLWR.S                         | 2 | 3.30 | 0.22 | -2.21 |
| IPI00019568 | Prothrombin precursor (Fragment) | R.TATSEYQTFNPR.T                      | 1 | 3.04 | 0.41 | -3.35 |
| IPI00019568 | Prothrombin precursor (Fragment) | R.TATSEYQTFNPR.T                      | 2 | 4.10 | 0.44 | -3.20 |
| IPI00019568 | Prothrombin precursor (Fragment) | R.TATSEYQTFNPR.T                      | 3 | 2.52 | 0.39 | -1.42 |
| IPI00019576 | Coagulation factor X precursor   | K.ACIPTGPYPGK.Q                       | 2 | 3.01 | 0.38 | -2.95 |
| IPI00019576 | Coagulation factor X precursor   | K.ETYDFDIAVLR.L                       | 2 | 3.03 | 0.32 | -3.13 |
| IPI00019576 | Coagulation factor X precursor   | K.M*LEVPHYVDR.N                       | 1 | 1.66 | 0.13 | -3.40 |
| IPI00019576 | Coagulation factor X precursor   | K.M*LEVPHYVDR.N                       | 2 | 3.06 | 0.17 | -3.50 |
| IPI00019576 | Coagulation factor X precursor   | K.TGIVSGFGR.T                         | 1 | 1.88 | 0.20 | -3.19 |
| IPI00019576 | Coagulation factor X precursor   | K.TGIVSGFGR.T                         | 2 | 3.24 | 0.28 | -3.34 |
| IPI00019576 | Coagulation factor X precursor   | K.YGIYTK.V                            | 1 | 1.81 | 0.17 | -1.55 |
| IPI00019576 | Coagulation factor X precursor   | R.DWAESTLM*TQK.T                      | 2 | 3.52 | 0.46 | -3.45 |
| IPI00019576 | Coagulation factor X precursor   | R.EQANNILAR.V                         | 2 | 1.96 | 0.07 | 1.07  |
| IPI00019576 | Coagulation factor X precursor   | R.FTKETYDFDIAVLR.L                    | 3 | 2.77 | 0.27 | -0.90 |
| IPI00019576 | Coagulation factor X precursor   | R.GYTLADNGK.A                         | 1 | 2.15 | 0.22 | -3.59 |
| IPI00019576 | Coagulation factor X precursor   | R.LKM*LEVPHYVDR.N                     | 3 | 2.45 | 0.16 | -2.32 |
| IPI00019576 | Coagulation factor X precursor   | R.M*NVAPACLPER.D                      | 2 | 2.85 | 0.22 | -2.54 |
| IPI00019576 | Coagulation factor X precursor   | R.NTEQEEGGEAVHEVEVVIK.H               | 2 | 4.92 | 0.44 | -4.32 |
| IPI00019576 | Coagulation factor X precursor   | R.NTEQEEGGEAVHEVEVVIK.H               | 3 | 2.83 | 0.17 | -4.27 |
| IPI00019580 | Plasminogen precursor            | G.EPLDDYVNTQGASLFSVTK.K               | 2 | 4.00 | 0.46 | -2.17 |
| IPI00019580 | Plasminogen precursor            | G.EPLDDYVNTQGASLFSVTK.K               | 2 | 3.40 | 0.52 | -2.62 |
| IPI00019580 | Plasminogen precursor            | K.CQSWSSM*TPHR.H                      | 2 | 2.49 | 0.16 |       |
| IPI00019580 | Plasminogen precursor            | K.CQSWSSM*TPHR.H                      | 3 | 3.09 | 0.19 |       |
| IPI00019580 | Plasminogen precursor            | K.CSGTEASVVAPPVLLPDVETPSEEDCM*FGNGK.G | 3 | 5.03 | 0.34 |       |
| IPI00019580 | Plasminogen precursor            | K.EAQLPVIENK.V                        | 1 | 2.80 | 0.28 | -2.54 |
| IPI00019580 | Plasminogen precursor            | K.EAQLPVIENK.V                        | 2 | 2.77 | 0.28 | -1.61 |

|             |                       |                                          |   |      |      |       |
|-------------|-----------------------|------------------------------------------|---|------|------|-------|
| IPI00019580 | Plasminogen precursor | K.EQQCVIM*AENR.K                         | 2 | 2.37 | 0.33 | -2.94 |
| IPI00019580 | Plasminogen precursor | K.EQQCVIM*AENRK.S                        | 2 | 2.82 | 0.28 |       |
| IPI00019580 | Plasminogen precursor | K.KCSGTEASVAPPVLLPDVETPSEEDCM*FGNGK.G    | 3 | 4.81 | 0.26 |       |
| IPI00019580 | Plasminogen precursor | K.KQLGAGSIEECAAKCEDEEFTCR.A              | 3 | 5.16 | 0.24 |       |
| IPI00019580 | Plasminogen precursor | K.LSSPAVITDK.V                           | 1 | 1.82 | 0.13 | -3.60 |
| IPI00019580 | Plasminogen precursor | K.LSSPAVITDK.V                           | 2 | 2.13 | 0.18 |       |
| IPI00019580 | Plasminogen precursor | K.LSSPAVITDKVIPACLSPNYVVADR.T            | 3 | 5.05 | 0.45 | -3.08 |
| IPI00019580 | Plasminogen precursor | K.LYDYCDVPQCAAPSFDCGKQVEPK.K             | 3 | 3.16 | 0.13 |       |
| IPI00019580 | Plasminogen precursor | K.NLDENYCR.N                             | 2 | 2.08 | 0.19 | -1.29 |
| IPI00019580 | Plasminogen precursor | K.NLDENYCRNPDGK.R                        | 2 | 3.27 | 0.24 |       |
| IPI00019580 | Plasminogen precursor | K.NYCRNPDGDVGGPWCYTTNPR.K                | 2 | 4.43 | 0.23 |       |
| IPI00019580 | Plasminogen precursor | K.NYCRNPDGDVGGPWVWYTTNPR.K               | 3 | 5.60 | 0.46 |       |
| IPI00019580 | Plasminogen precursor | K.QLGAGSIEECAAK.C                        | 2 | 3.10 | 0.45 | -2.87 |
| IPI00019580 | Plasminogen precursor | K.QLGAGSIEECAAKCEDEEFTCR.A               | 2 | 3.77 | 0.37 |       |
| IPI00019580 | Plasminogen precursor | K.QLGAGSIEECAAKCEDEEFTCR.A               | 3 | 3.50 | 0.46 | -1.82 |
| IPI00019580 | Plasminogen precursor | K.TPENYPNAGLTM*NYCR.N                    | 2 | 3.76 | 0.30 |       |
| IPI00019580 | Plasminogen precursor | K.VCNRYEFLNGR.V                          | 2 | 3.73 | 0.34 |       |
| IPI00019580 | Plasminogen precursor | K.VCNRYEFLNGR.V                          | 3 | 3.70 | 0.12 |       |
| IPI00019580 | Plasminogen precursor | K.VILGAHQEVNLEPHVQEIEVSR.L               | 2 | 4.13 | 0.20 |       |
| IPI00019580 | Plasminogen precursor | K.VILGAHQEVNLEPHVQEIEVSR.L               | 3 | 5.34 | 0.40 | -2.97 |
| IPI00019580 | Plasminogen precursor | K.VILGAHQEVNLEPHVQEIEVSR.L               | 4 | 1.85 | 0.21 | -3.29 |
| IPI00019580 | Plasminogen precursor | K.VIPACLSPNYVVADR.T                      | 2 | 3.58 | 0.38 |       |
| IPI00019580 | Plasminogen precursor | K.VIPACLSPNYVVADRTECFITGWGETQGTFGAGLLK.E | 3 | 3.25 | 0.40 |       |
| IPI00019580 | Plasminogen precursor | K.VYLSECK.T                              | 1 | 1.70 | 0.20 | -2.43 |
| IPI00019580 | Plasminogen precursor | R.ATTVTGTPCQDWAQEPHR.H                   | 2 | 4.79 | 0.53 |       |
| IPI00019580 | Plasminogen precursor | R.CTTPPPSSGPTYQCLK.G                     | 2 | 3.50 | 0.35 | -3.13 |
| IPI00019580 | Plasminogen precursor | R.ELRPWCFTTDPNKR.W                       | 3 | 2.92 | 0.12 |       |
| IPI00019580 | Plasminogen precursor | R.FGM*HFCGGTLISPEWVLTAAHCLEK.S           | 3 | 5.95 | 0.43 |       |
| IPI00019580 | Plasminogen precursor | R.FSPATHPSEGLEENYCR.N                    | 2 | 5.41 | 0.45 |       |
| IPI00019580 | Plasminogen precursor | R.FSPATHPSEGLEENYCR.N                    | 3 | 3.11 | 0.33 |       |
| IPI00019580 | Plasminogen precursor | R.FVTWIEGVM*R.N                          | 2 | 3.76 | 0.27 | -3.40 |
| IPI00019580 | Plasminogen precursor | R.HSIFTPETNPR.A                          | 1 | 2.94 | 0.30 |       |
| IPI00019580 | Plasminogen precursor | R.HSIFTPETNPR.A                          | 2 | 3.10 | 0.31 | -2.53 |
| IPI00019580 | Plasminogen precursor | R.KLYDYCDVPQCAAPSFDCGKQVEPK.K            | 2 | 3.65 | 0.39 |       |
| IPI00019580 | Plasminogen precursor | R.KLYDYCDVPQCAAPSFDCGKQVEPK.K            | 3 | 5.72 | 0.48 |       |
| IPI00019580 | Plasminogen precursor | R.M*RDVVLFEKK.V                          | 2 | 2.49 | 0.17 |       |
| IPI00019580 | Plasminogen precursor | R.NPDADKGPWCFTTDPNKR.W                   | 2 | 3.15 | 0.34 | -4.03 |
| IPI00019580 | Plasminogen precursor | R.NPDADKGPWCFTTDPNKR.W                   | 3 | 3.23 | 0.42 | -2.44 |
| IPI00019580 | Plasminogen precursor | R.NPDGDVGGPWVWYTTNPR.K                   | 2 | 4.92 | 0.59 | -4.48 |
| IPI00019580 | Plasminogen precursor | R.NPDNDPQGPWCYTTDPEKR.Y                  | 2 | 2.32 | 0.15 |       |
| IPI00019580 | Plasminogen precursor | R.NPDNDPQGPWCYTTDPEKR.Y                  | 3 | 2.89 | 0.28 | -1.67 |
| IPI00019580 | Plasminogen precursor | R.TECFITGWGETQGTFGAGLLK.E                | 2 | 6.02 | 0.50 |       |

|             |                                                       |                                       |   |      |      |       |
|-------------|-------------------------------------------------------|---------------------------------------|---|------|------|-------|
| IPI00019580 | Plasminogen precursor                                 | R.TECFITGWGETQGTFGAGLLK.E             | 3 | 3.99 | 0.22 |       |
| IPI00019580 | Plasminogen precursor                                 | R.TPENFPCK.N                          | 2 | 2.73 | 0.22 | -2.19 |
| IPI00019580 | Plasminogen precursor                                 | R.TPENFPCKNLDENYCR.N                  | 3 | 3.52 | 0.19 |       |
| IPI00019580 | Plasminogen precursor                                 | R.VQSTELCAGHLAGGTDSCQGDSSGGLVCFEK.D   | 3 | 6.09 | 0.56 | -2.99 |
| IPI00019580 | Plasminogen precursor                                 | R.VQSTELCAGHLAGGTDSCQGDSSGGLVCFEKDK.Y | 3 | 5.32 | 0.40 |       |
| IPI00019580 | Plasminogen precursor                                 | R.YDYCDILECEEECM*HCSGENYDGK.I         | 3 | 4.36 | 0.30 |       |
| IPI00019580 | Plasminogen precursor                                 | R.YDYCDILECEEECMHCSGENYDGK.I          | 3 | 4.12 | 0.42 |       |
| IPI00019580 | Plasminogen precursor                                 | R.YEFLNGR.V                           | 2 | 2.14 | 0.13 | -3.24 |
| IPI00019580 | Plasminogen precursor                                 | W.DSQSPHAHGYIPSKFPNK.N                | 3 | 3.57 | 0.24 | -2.13 |
| IPI00019581 | Coagulation factor XII precursor                      | K.CFEPQLLR.F                          | 1 | 1.87 | 0.16 | -2.83 |
| IPI00019581 | Coagulation factor XII precursor                      | K.CFEPQLLR.F                          | 2 | 2.95 | 0.22 | -2.63 |
| IPI00019581 | Coagulation factor XII precursor                      | K.GRPGPQPWCATTPNFDQDQR.W              | 2 | 2.14 | 0.18 | -2.58 |
| IPI00019581 | Coagulation factor XII precursor                      | L.HEAFSPVSYQHDLALLR.L                 | 3 | 3.68 | 0.46 | -2.89 |
| IPI00019581 | Coagulation factor XII precursor                      | R.LCHCPVGYTGPFCDVDTK.A                | 3 | 5.32 | 0.34 |       |
| IPI00019581 | Coagulation factor XII precursor                      | R.LHEAFSPVSYQHDLALLR.L                | 2 | 6.32 | 0.65 | -3.56 |
| IPI00019581 | Coagulation factor XII precursor                      | R.LHEAFSPVSYQHDLALLR.L                | 3 | 3.78 | 0.51 | -3.51 |
| IPI00019581 | Coagulation factor XII precursor                      | R.LHEAFSPVSYQHDLALLR.L                | 4 | 3.53 | 0.31 | -2.90 |
| IPI00019581 | Coagulation factor XII precursor                      | R.LQEDADGSCALLSPYVQPVLPSGAAR.P        | 3 | 5.28 | 0.34 | -4.10 |
| IPI00019581 | Coagulation factor XII precursor                      | R.NKPGVYTDVAYYLAWIR.E                 | 3 | 3.25 | 0.22 | -3.92 |
| IPI00019581 | Coagulation factor XII precursor                      | R.NPDNDIRPWCFLNR.D                    | 3 | 3.45 | 0.38 | -2.36 |
| IPI00019581 | Coagulation factor XII precursor                      | R.PAPEDLTVVLGQER.R                    | 2 | 3.85 | 0.38 | -2.15 |
| IPI00019581 | Coagulation factor XII precursor                      | R.TEQAAVAR.C                          | 2 | 2.11 | 0.12 | -3.65 |
| IPI00019581 | Coagulation factor XII precursor                      | R.TTLSGAPCQPWASEATYR.N                | 2 | 5.45 | 0.49 | -2.91 |
| IPI00019581 | Coagulation factor XII precursor                      | R.VVGGGLVALR.G                        | 2 | 3.45 | 0.23 | -3.22 |
| IPI00019591 | Isoform 1 of Complement factor B precursor (Fragment) | A.PGYDKVKDISEVVTPR.F                  | 2 | 4.33 | 0.46 | -2.05 |
| IPI00019591 | Isoform 1 of Complement factor B precursor (Fragment) | C.PSGFYYPVQTR.T                       | 2 | 2.98 | 0.34 | -2.75 |
| IPI00019591 | Isoform 1 of Complement factor B precursor (Fragment) | K.ALFVSEEEK.K                         | 1 | 2.27 | 0.27 | -2.82 |
| IPI00019591 | Isoform 1 of Complement factor B precursor (Fragment) | K.ALFVSEEEK.K                         | 2 | 3.02 | 0.24 | -2.56 |
| IPI00019591 | Isoform 1 of Complement factor B precursor (Fragment) | K.ALFVSEEEK.L                         | 1 | 2.75 | 0.12 | -3.07 |
| IPI00019591 | Isoform 1 of Complement factor B precursor (Fragment) | K.ALFVSEEEK.L                         | 2 | 3.20 | 0.36 | -3.06 |
| IPI00019591 | Isoform 1 of Complement factor B precursor (Fragment) | K.CLVNLIEK.V                          | 2 | 3.07 | 0.13 | -1.64 |
| IPI00019591 | Isoform 1 of Complement factor B precursor (Fragment) | K.DISEVVTPR.F                         | 1 | 2.69 | 0.22 | -3.73 |
| IPI00019591 | Isoform 1 of Complement factor B precursor (Fragment) | K.DISEVVTPR.F                         | 2 | 3.42 | 0.28 | -2.70 |

|             |                                                       |                                    |   |      |      |       |
|-------------|-------------------------------------------------------|------------------------------------|---|------|------|-------|
| IPI00019591 | Isoform 1 of Complement factor B precursor (Fragment) | K.DNEQHVFK.V                       | 1 | 2.42 | 0.13 | -3.09 |
| IPI00019591 | Isoform 1 of Complement factor B precursor (Fragment) | K.EAGIPEFYDYDVALIK.L               | 1 | 1.10 | 0.36 | -2.70 |
| IPI00019591 | Isoform 1 of Complement factor B precursor (Fragment) | K.EAGIPEFYDYDVALIK.L               | 2 | 4.70 | 0.51 | -6.61 |
| IPI00019591 | Isoform 1 of Complement factor B precursor (Fragment) | K.EAGIPEFYDYDVALIK.L               | 3 | 3.92 | 0.38 | -4.27 |
| IPI00019591 | Isoform 1 of Complement factor B precursor (Fragment) | K.EELPAQDIK.A                      | 1 | 2.17 | 0.15 | -2.57 |
| IPI00019591 | Isoform 1 of Complement factor B precursor (Fragment) | K.EELPAQDIK.A                      | 2 | 2.30 | 0.09 | -3.35 |
| IPI00019591 | Isoform 1 of Complement factor B precursor (Fragment) | K.EKLQDEDLGFL.-                    | 1 | 2.99 | 0.22 | -3.75 |
| IPI00019591 | Isoform 1 of Complement factor B precursor (Fragment) | K.EKLQDEDLGFL.-                    | 2 | 3.86 | 0.40 | -4.54 |
| IPI00019591 | Isoform 1 of Complement factor B precursor (Fragment) | K.EVYIKNGDKK.G                     | 2 | 2.95 | 0.16 | -2.31 |
| IPI00019591 | Isoform 1 of Complement factor B precursor (Fragment) | K.ISVIRPSK.G                       | 2 | 2.51 | 0.13 | -3.46 |
| IPI00019591 | Isoform 1 of Complement factor B precursor (Fragment) | K.KCLVNLIEK.V                      | 2 | 2.26 | 0.11 | -2.98 |
| IPI00019591 | Isoform 1 of Complement factor B precursor (Fragment) | K.KDNEQHVFK.V                      | 1 | 2.03 | 0.12 | -4.48 |
| IPI00019591 | Isoform 1 of Complement factor B precursor (Fragment) | K.KDNEQHVFK.V                      | 2 | 3.04 | 0.32 | -2.96 |
| IPI00019591 | Isoform 1 of Complement factor B precursor (Fragment) | K.KEAGIPEFYDYDVALIK.L              | 2 | 5.02 | 0.44 | -5.93 |
| IPI00019591 | Isoform 1 of Complement factor B precursor (Fragment) | K.KEAGIPEFYDYDVALIK.L              | 3 | 4.09 | 0.34 | -3.32 |
| IPI00019591 | Isoform 1 of Complement factor B precursor (Fragment) | K.LQDEDLGFL.-                      | 1 | 1.87 | 0.18 | -4.96 |
| IPI00019591 | Isoform 1 of Complement factor B precursor (Fragment) | K.LQDEDLGFL.-                      | 2 | 2.50 | 0.21 | -2.37 |
| IPI00019591 | Isoform 1 of Complement factor B precursor (Fragment) | K.NPREDYLDVYVFGVGPLVNQVNINALASK.K  | 3 | 7.19 | 0.50 | -5.23 |
| IPI00019591 | Isoform 1 of Complement factor B precursor (Fragment) | K.NPREDYLDVYVFGVGPLVNQVNINALASKK.D | 3 | 3.92 | 0.29 | -1.92 |
| IPI00019591 | Isoform 1 of Complement factor B precursor (Fragment) | K.QLNEINYEDHK.L                    | 1 | 2.07 | 0.19 | -2.47 |
| IPI00019591 | Isoform 1 of Complement factor B precursor (Fragment) | K.QLNEINYEDHK.L                    | 2 | 2.77 | 0.42 | -4.66 |

|             |                                                       |                            |   |      |      |       |
|-------------|-------------------------------------------------------|----------------------------|---|------|------|-------|
| IPI00019591 | Isoform 1 of Complement factor B precursor (Fragment) | K.QLNEINYEDHKLK.S          | 2 | 2.53 | 0.35 | -3.97 |
| IPI00019591 | Isoform 1 of Complement factor B precursor (Fragment) | K.RDLEIEVVLFPNYNINGK.K     | 3 | 3.57 | 0.24 | -4.33 |
| IPI00019591 | Isoform 1 of Complement factor B precursor (Fragment) | K.VASYGVKPR.Y              | 1 | 2.21 | 0.17 | -5.14 |
| IPI00019591 | Isoform 1 of Complement factor B precursor (Fragment) | K.VASYGVKPR.Y              | 2 | 2.87 | 0.33 | -2.82 |
| IPI00019591 | Isoform 1 of Complement factor B precursor (Fragment) | K.VKDISEVTPR.F             | 1 | 2.82 | 0.25 | -3.79 |
| IPI00019591 | Isoform 1 of Complement factor B precursor (Fragment) | K.VKDISEVTPR.F             | 2 | 4.19 | 0.41 | -3.41 |
| IPI00019591 | Isoform 1 of Complement factor B precursor (Fragment) | K.VKDISEVTPR.F             | 3 | 3.92 | 0.15 | -4.36 |
| IPI00019591 | Isoform 1 of Complement factor B precursor (Fragment) | K.VSEADSSNADWVTK.Q         | 2 | 5.06 | 0.51 | -2.40 |
| IPI00019591 | Isoform 1 of Complement factor B precursor (Fragment) | K.VSVGGEKR.D               | 2 | 1.95 | 0.09 | -2.36 |
| IPI00019591 | Isoform 1 of Complement factor B precursor (Fragment) | K.YGQTIRPICLPCTEGTTR.A     | 2 | 3.71 | 0.45 | -2.92 |
| IPI00019591 | Isoform 1 of Complement factor B precursor (Fragment) | K.YGQTIRPICLPCTEGTTR.A     | 3 | 3.81 | 0.36 | -4.06 |
| IPI00019591 | Isoform 1 of Complement factor B precursor (Fragment) | R.ALRLPPTTTCQQKEELLAQDIK.A | 3 | 4.28 | 0.36 | -5.03 |
| IPI00019591 | Isoform 1 of Complement factor B precursor (Fragment) | R.DAQYAPGYDK.V             | 1 | 2.53 | 0.29 | -3.55 |
| IPI00019591 | Isoform 1 of Complement factor B precursor (Fragment) | R.DAQYAPGYDK.V             | 2 | 3.31 | 0.25 | -3.99 |
| IPI00019591 | Isoform 1 of Complement factor B precursor (Fragment) | R.DAQYAPGYDKVK.D           | 1 | 2.24 | 0.20 | 0.38  |
| IPI00019591 | Isoform 1 of Complement factor B precursor (Fragment) | R.DAQYAPGYDKVK.D           | 2 | 3.11 | 0.30 | -3.29 |
| IPI00019591 | Isoform 1 of Complement factor B precursor (Fragment) | R.DAQYAPGYDKVK.D           | 3 | 1.98 | 0.20 | -3.57 |
| IPI00019591 | Isoform 1 of Complement factor B precursor (Fragment) | R.DAQYAPGYDKVKDISEVTPR.F   | 2 | 5.40 | 0.59 | -2.96 |
| IPI00019591 | Isoform 1 of Complement factor B precursor (Fragment) | R.DAQYAPGYDKVKDISEVTPR.F   | 3 | 3.77 | 0.41 | -2.75 |
| IPI00019591 | Isoform 1 of Complement factor B precursor (Fragment) | R.DAQYAPGYDKVKDISEVTPR.F   | 4 | 3.09 | 0.23 | -1.71 |
| IPI00019591 | Isoform 1 of Complement factor B precursor (Fragment) | R.DFHINLFQVLPWLK.E         | 2 | 3.25 | 0.24 | -4.14 |

|             |                                                       |                                    |   |      |      |       |
|-------------|-------------------------------------------------------|------------------------------------|---|------|------|-------|
| IPI00019591 | Isoform 1 of Complement factor B precursor (Fragment) | R.DFHINLFQVLPWLK.E                 | 3 | 4.20 | 0.10 | -3.43 |
| IPI00019591 | Isoform 1 of Complement factor B precursor (Fragment) | R.DLEIEVVLHFPNYNINGK.K             | 2 | 5.07 | 0.45 | -4.16 |
| IPI00019591 | Isoform 1 of Complement factor B precursor (Fragment) | R.DLEIEVVLHFPNYNINGK.K             | 3 | 3.82 | 0.38 | -4.35 |
| IPI00019591 | Isoform 1 of Complement factor B precursor (Fragment) | R.DLEIEVVLHFPNYNINGKK.E            | 3 | 4.28 | 0.42 | -4.39 |
| IPI00019591 | Isoform 1 of Complement factor B precursor (Fragment) | R.DLEIEVVLHFPNYNINGKK.E            | 4 | 3.55 | 0.25 | -1.03 |
| IPI00019591 | Isoform 1 of Complement factor B precursor (Fragment) | R.DLLYIGK.D                        | 1 | 1.98 | 0.15 | -1.85 |
| IPI00019591 | Isoform 1 of Complement factor B precursor (Fragment) | R.DLLYIGKDR.K                      | 2 | 2.89 | 0.22 | -1.61 |
| IPI00019591 | Isoform 1 of Complement factor B precursor (Fragment) | R.EDYLDVYVFGVGPLVNQVNINALASK.K     | 2 | 5.00 | 0.53 | -1.52 |
| IPI00019591 | Isoform 1 of Complement factor B precursor (Fragment) | R.EDYLDVYVFGVGPLVNQVNINALASK.K     | 3 | 4.05 | 0.49 | -2.69 |
| IPI00019591 | Isoform 1 of Complement factor B precursor (Fragment) | R.EDYLDVYVFGVGPLVNQVNINALASKK.D    | 3 | 3.45 | 0.28 | -4.31 |
| IPI00019591 | Isoform 1 of Complement factor B precursor (Fragment) | R.FIQVGVISWGVVDVCK.N               | 2 | 2.56 | 0.22 | -0.04 |
| IPI00019591 | Isoform 1 of Complement factor B precursor (Fragment) | R.FLCTGGVSPYADPNTCR.G              | 2 | 5.01 | 0.49 | -5.66 |
| IPI00019591 | Isoform 1 of Complement factor B precursor (Fragment) | R.FLCTGGVSPYADPNTCR.G              | 3 | 3.59 | 0.36 | -4.42 |
| IPI00019591 | Isoform 1 of Complement factor B precursor (Fragment) | R.GDSGGPLIVHK.R                    | 1 | 2.11 | 0.22 | -4.23 |
| IPI00019591 | Isoform 1 of Complement factor B precursor (Fragment) | R.HVIILM*TDGLHNM*GGDPITVIDEIR.D    | 3 | 5.75 | 0.58 | -4.90 |
| IPI00019591 | Isoform 1 of Complement factor B precursor (Fragment) | R.HVIILM*TDGLHNM*GGDPITVIDEIR.D    | 4 | 3.63 | 0.21 | -3.61 |
| IPI00019591 | Isoform 1 of Complement factor B precursor (Fragment) | R.KNPREDYLDVYVFGVGPLVNQVNINALASK.K | 3 | 8.07 | 0.60 | -5.11 |
| IPI00019591 | Isoform 1 of Complement factor B precursor (Fragment) | R.KNPREDYLDVYVFGVGPLVNQVNINALASK.K | 4 | 5.74 | 0.46 | -4.93 |
| IPI00019591 | Isoform 1 of Complement factor B precursor (Fragment) | R.LEDSVTYHCSR.G                    | 2 | 3.93 | 0.42 | -2.26 |
| IPI00019591 | Isoform 1 of Complement factor B precursor (Fragment) | R.LEDSVTYHCSR.G                    | 3 | 1.94 | 0.11 | -0.75 |
| IPI00019591 | Isoform 1 of Complement factor B precursor (Fragment) | R.LLQEGQALEYVCPSGFYPPVQTR.T        | 2 | 4.85 | 0.55 | -5.96 |

|             |                                                               |                                     |   |      |      |       |
|-------------|---------------------------------------------------------------|-------------------------------------|---|------|------|-------|
| IPI00019591 | Isoform 1 of Complement factor B precursor (Fragment)         | R.LLQEGQALEYVCPSTGYPYVQTR.T         | 3 | 6.89 | 0.54 | -6.53 |
| IPI00019591 | Isoform 1 of Complement factor B precursor (Fragment)         | R.LLQEGQALEYVCPSTGYPYVQTR.T         | 4 | 4.22 | 0.44 | -3.67 |
| IPI00019591 | Isoform 1 of Complement factor B precursor (Fragment)         | R.LPPTTTCQQQK.E                     | 2 | 3.17 | 0.44 | -3.38 |
| IPI00019591 | Isoform 1 of Complement factor B precursor (Fragment)         | R.LPPTTTCQQQKEELLPAQDIK.A           | 3 | 3.71 | 0.28 | -3.85 |
| IPI00019591 | Isoform 1 of Complement factor B precursor (Fragment)         | R.PQGSCSLEGVEIK.G                   | 2 | 4.15 | 0.33 | -3.93 |
| IPI00019591 | Isoform 1 of Complement factor B precursor (Fragment)         | R.WSQTAICDNGAGYCSNPGIPIGTR.K        | 2 | 5.47 | 0.59 | -1.92 |
| IPI00019591 | Isoform 1 of Complement factor B precursor (Fragment)         | R.WSQTAICDNGAGYCSNPGIPIGTR.K        | 3 | 5.16 | 0.50 | -2.52 |
| IPI00019591 | Isoform 1 of Complement factor B precursor (Fragment)         | R.YGLVTYATYPK.I                     | 1 | 2.08 | 0.30 | -3.70 |
| IPI00019591 | Isoform 1 of Complement factor B precursor (Fragment)         | R.YGLVTYATYPK.I                     | 2 | 4.69 | 0.53 | -3.59 |
| IPI00019600 | Ubiquitin-conjugating enzyme E2 variant 2                     | K.INM*NGINSSGM*VDAR.S               | 2 | 4.61 | 0.45 | -5.60 |
| IPI00019600 | Ubiquitin-conjugating enzyme E2 variant 2                     | R.LLEELEEGQK.G                      | 2 | 2.84 | 0.19 | -3.61 |
| IPI00019600 | Ubiquitin-conjugating enzyme E2 variant 2                     | R.WTGM*IIGPPR.T                     | 2 | 2.56 | 0.11 | -0.35 |
| IPI00019755 | Glutathione transferase omega-1                               | K.EFTKLEEVLTNKK.T                   | 2 | 3.76 | 0.31 | -3.50 |
| IPI00019755 | Glutathione transferase omega-1                               | K.GSAPPGPVPEGSIR.I                  | 2 | 2.13 | 0.08 | -1.06 |
| IPI00019755 | Glutathione transferase omega-1                               | K.VPSLVGSFIR.S                      | 2 | 2.70 | 0.31 | -0.88 |
| IPI00019771 | Fractalkine precursor                                         | K.DAM*QHLDR.Q                       | 2 | 2.36 | 0.14 | -1.55 |
| IPI00019771 | Fractalkine precursor                                         | R.LGVLITVPDAQAATRR.Q                | 2 | 2.57 | 0.10 | -2.98 |
| IPI00019812 | Serine/threonine-protein phosphatase 5                        | K.AFLEENLDYIIR.S                    | 2 | 4.51 | 0.41 | -3.21 |
| IPI00019812 | Serine/threonine-protein phosphatase 5                        | K.VLIM*HGGLFSEDGVTLDDIR.K           | 3 | 4.09 | 0.30 | -1.54 |
| IPI00019862 | butyrophilin, subfamily 2, member A1 isoform 2 precursor      | R.ERTEEQM*EEYR.G                    | 2 | 2.26 | 0.12 | -3.71 |
| IPI00019862 | butyrophilin, subfamily 2, member A1 isoform 2 precursor      | R.ERTEEQM*EEYR.G                    | 3 | 2.93 | 0.17 | -2.36 |
| IPI00019862 | butyrophilin, subfamily 2, member A1 isoform 2 precursor      | R.SQFSPA VFVYK.G                    | 2 | 3.28 | 0.42 | -2.48 |
| IPI00019862 | butyrophilin, subfamily 2, member A1 isoform 2 precursor      | R.TEEQM*EEYRGR.I                    | 2 | 1.55 | 0.13 | -2.85 |
| IPI00019888 | Succinate-semialdehyde dehydrogenase, mitochondrial precursor | R.VSMELGGLAPFIVFDSANVDQAVAGAMASK.F  | 3 | 2.88 | 0.26 | -2.01 |
| IPI00019901 | Isoform 1 of Alpha-adducin                                    | R.NHGLVSVGESVEEAFYIHNLVVACEIQVR.T   | 3 | 4.17 | 0.33 | -3.89 |
| IPI00019901 | Isoform 1 of Alpha-adducin                                    | R.NHGLVSVGESVEEAFYIHNLVVACEIQVR.T   | 4 | 4.31 | 0.35 | -3.71 |
| IPI00019904 | Isoform 1 of Beta-adducin                                     | K.KLELDGEKETAPEEPGSPAKSAPAS.P       | 2 | 3.34 | 0.09 | -4.15 |
| IPI00019904 | Isoform 1 of Beta-adducin                                     | K.WGLLPVSHNALLVGDMAYYDFNGEMEQEADR.I | 3 | 6.01 | 0.52 | -3.13 |



|             |                                |                                |   |      |      |       |
|-------------|--------------------------------|--------------------------------|---|------|------|-------|
| IPI00019906 | Isoform 2 of Basigin precursor | A.GTVFTTVEDLGSK.I              | 2 | 4.13 | 0.41 | -3.96 |
| IPI00019906 | Isoform 2 of Basigin precursor | G.AAGTVFTTVEDLGSK.I            | 2 | 4.52 | 0.49 | -3.16 |
| IPI00019906 | Isoform 2 of Basigin precursor | K.GGVVLKEDALPGQK.T             | 2 | 3.91 | 0.29 | -2.93 |
| IPI00019906 | Isoform 2 of Basigin precursor | K.GGVVLKEDALPGQK.T             | 3 | 3.58 | 0.15 | -1.75 |
| IPI00019906 | Isoform 2 of Basigin precursor | K.SESVPPVTDWAWYK.I             | 2 | 3.29 | 0.43 | -3.11 |
| IPI00019906 | Isoform 2 of Basigin precursor | K.SSEHINEGETAM*.L              | 2 | 3.35 | 0.45 | -3.48 |
| IPI00019906 | Isoform 2 of Basigin precursor | R.FFVSSSQGR.S                  | 2 | 3.02 | 0.29 | -1.65 |
| IPI00019906 | Isoform 2 of Basigin precursor | R.SELHIENLNM*EADPGQY.R         | 2 | 3.24 | 0.38 | -3.75 |
| IPI00019906 | Isoform 2 of Basigin precursor | R.SELHIENLNM*EADPGQYR.C        | 3 | 4.52 | 0.30 | -2.64 |
| IPI00019907 | Glypican-3 precursor           | L.DVDDAPGNSQQATPK.D            | 2 | 3.36 | 0.38 | -1.66 |
| IPI00019907 | Glypican-3 precursor           | Y.DLDVDDAPGNSQQATPK.D          | 2 | 4.71 | 0.43 | -2.48 |
| IPI00019943 | Afamin precursor               | F.HADM*CQSQNEELQR.K            | 3 | 4.14 | 0.19 | -0.70 |
| IPI00019943 | Afamin precursor               | K.AESPEVCFNEESPK.I             | 2 | 4.39 | 0.42 |       |
| IPI00019943 | Afamin precursor               | K.AESPEVCFNEESPKIGN.-          | 2 | 3.09 | 0.30 |       |
| IPI00019943 | Afamin precursor               | K.CCKAESPEVCFNEESPKIGN.-       | 3 | 3.17 | 0.14 |       |
| IPI00019943 | Afamin precursor               | K.CQAYESNRESLLNHFLYEVAR.R      | 3 | 3.73 | 0.13 |       |
| IPI00019943 | Afamin precursor               | K.DGLKYHYLIR.L                 | 3 | 2.23 | 0.14 | -3.15 |
| IPI00019943 | Afamin precursor               | K.DLSLREGK.F                   | 2 | 1.47 | 0.06 | -1.99 |
| IPI00019943 | Afamin precursor               | K.DM*VEYKDR.C                  | 2 | 2.67 | 0.13 | -1.82 |
| IPI00019943 | Afamin precursor               | K.ELISLVEDVSSNYDGCCEGDVVQCIR.D | 3 | 5.77 | 0.58 | -3.12 |
| IPI00019943 | Afamin precursor               | K.FTFEYSR.R                    | 1 | 2.03 | 0.11 | -0.75 |
| IPI00019943 | Afamin precursor               | K.FTFEYSR.R                    | 2 | 2.40 | 0.29 | -1.50 |
| IPI00019943 | Afamin precursor               | K.HELTDEELQSLFTNFANVVDK.C      | 3 | 5.10 | 0.45 | -3.52 |
| IPI00019943 | Afamin precursor               | K.HFQNLGKDGLK.Y                | 2 | 3.59 | 0.34 | -1.33 |
| IPI00019943 | Afamin precursor               | K.HFQNLGKDGLK.Y                | 3 | 2.46 | 0.10 | -4.04 |
| IPI00019943 | Afamin precursor               | K.IAPQLSTEELVSLGEK.M           | 2 | 4.81 | 0.53 | -7.03 |
| IPI00019943 | Afamin precursor               | K.IAPQLSTEELVSLGEK.M           | 3 | 2.71 | 0.16 | -2.58 |
| IPI00019943 | Afamin precursor               | K.ICAM*EGLPQK.H                | 2 | 3.30 | 0.35 | -3.88 |
| IPI00019943 | Afamin precursor               | K.KSDVGFLPPFPTLDPEEK.C         | 2 | 4.48 | 0.48 | -4.80 |
| IPI00019943 | Afamin precursor               | K.KSDVGFLPPFPTLDPEEK.C         | 3 | 3.70 | 0.27 | -2.51 |
| IPI00019943 | Afamin precursor               | K.LKHELTDEELQSLFTNFANVVDK.C    | 2 | 5.57 | 0.58 | -5.48 |
| IPI00019943 | Afamin precursor               | K.LKHELTDEELQSLFTNFANVVDK.C    | 3 | 6.26 | 0.56 | -6.02 |
| IPI00019943 | Afamin precursor               | K.LKHELTDEELQSLFTNFANVVDK.C    | 4 | 5.66 | 0.48 | -4.38 |
| IPI00019943 | Afamin precursor               | K.LPNNVLQEK.I                  | 1 | 3.04 | 0.16 | -3.10 |
| IPI00019943 | Afamin precursor               | K.LPNNVLQEK.I                  | 2 | 3.29 | 0.20 | -2.69 |
| IPI00019943 | Afamin precursor               | K.LVKDM*VEYKDR.C               | 2 | 2.78 | 0.36 | -0.22 |
| IPI00019943 | Afamin precursor               | K.LVKDM*VEYKDR.C               | 3 | 2.46 | 0.20 | 0.38  |
| IPI00019943 | Afamin precursor               | K.SCCEEQNKVNCLQTR.A            | 2 | 5.43 | 0.27 |       |
| IPI00019943 | Afamin precursor               | K.SCCEEQNKVNCLQTR.A            | 3 | 3.91 | 0.40 | -2.12 |
| IPI00019943 | Afamin precursor               | K.SDVGFLPPFPTLDPEEK.C          | 2 | 4.37 | 0.38 | -4.80 |
| IPI00019943 | Afamin precursor               | K.TDRFLVNLVK.L                 | 2 | 2.51 | 0.05 | -4.54 |
| IPI00019943 | Afamin precursor               | K.TLPECKSLPNNVLQEK.I           | 2 | 4.68 | 0.27 |       |

|             |                                               |                                |   |      |      |       |
|-------------|-----------------------------------------------|--------------------------------|---|------|------|-------|
| IPI00019943 | Afamin precursor                              | K.TNFAFR.R                     | 1 | 1.94 | 0.09 | -0.01 |
| IPI00019943 | Afamin precursor                              | K.VM*NHICSK.Q                  | 2 | 2.68 | 0.19 |       |
| IPI00019943 | Afamin precursor                              | K.YHYLIR.L                     | 1 | 1.69 | 0.06 | -4.82 |
| IPI00019943 | Afamin precursor                              | R.AIPVTQYLK.A                  | 1 | 1.59 | 0.10 | -1.58 |
| IPI00019943 | Afamin precursor                              | R.AIPVTQYLK.A                  | 2 | 1.17 | 0.09 | -0.96 |
| IPI00019943 | Afamin precursor                              | R.DADPDFFAK.F                  | 1 | 2.82 | 0.36 | -3.53 |
| IPI00019943 | Afamin precursor                              | R.DADPDFFAK.F                  | 2 | 2.96 | 0.33 | -3.06 |
| IPI00019943 | Afamin precursor                              | R.EGFTDSENVQER.D               | 2 | 3.61 | 0.37 |       |
| IPI00019943 | Afamin precursor                              | R.ESLLNHFLYEVAR.R              | 2 | 3.86 | 0.43 | -3.56 |
| IPI00019943 | Afamin precursor                              | R.ESLLNHFLYEVAR.R              | 3 | 2.74 | 0.23 | -1.25 |
| IPI00019943 | Afamin precursor                              | R.FLVNLVK.L                    | 2 | 2.45 | 0.06 | -3.10 |
| IPI00019943 | Afamin precursor                              | R.IVQIYKDLLR.N                 | 2 | 2.49 | 0.11 | -1.11 |
| IPI00019943 | Afamin precursor                              | R.IVQIYKDLLR.N                 | 3 | 2.86 | 0.34 | -3.45 |
| IPI00019943 | Afamin precursor                              | R.KTDRFLVNLVK.L                | 2 | 2.78 | 0.15 | -4.37 |
| IPI00019943 | Afamin precursor                              | R.LCFYFNK.K                    | 2 | 2.53 | 0.21 | -1.41 |
| IPI00019943 | Afamin precursor                              | R.NPFVFAPTLTVAVHFEEVAK.S       | 2 | 4.26 | 0.52 | -2.29 |
| IPI00019943 | Afamin precursor                              | R.NPFVFAPTLTVAVHFEEVAK.S       | 3 | 2.76 | 0.17 | -3.31 |
| IPI00019943 | Afamin precursor                              | R.RHPDLSIPELLR.I               | 2 | 3.54 | 0.37 | -5.02 |
| IPI00019943 | Afamin precursor                              | R.TINPAVDHCKK.T                | 2 | 3.10 | 0.29 |       |
| IPI00019954 | Cystatin-M precursor                          | K.AQSQLVAGIK.Y                 | 1 | 1.94 | 0.13 | -1.97 |
| IPI00019954 | Cystatin-M precursor                          | K.AQSQLVAGIK.Y                 | 2 | 3.47 | 0.22 | -1.82 |
| IPI00019954 | Cystatin-M precursor                          | K.YFLTM*EM*GSTDCR.K            | 2 | 2.92 | 0.51 | -4.88 |
| IPI00019954 | Cystatin-M precursor                          | R.DLSPDDPQVQK.A                | 2 | 2.50 | 0.27 | -2.60 |
| IPI00019954 | Cystatin-M precursor                          | R.M*VGELRDLSPDDPQVQK.A         | 2 | 2.95 | 0.25 | -3.35 |
| IPI00019954 | Cystatin-M precursor                          | R.M*VGELRDLSPDDPQVQK.A         | 3 | 3.52 | 0.30 | -1.98 |
| IPI00019954 | Cystatin-M precursor                          | R.VTGDHVDLTTCPAAGAQQEK.L       | 3 | 3.80 | 0.29 | -1.92 |
| IPI00019988 | N-sulphoglucosamine sulphohydrolase precursor | R.RSLLFRNAFTSVSSCSPSR.A        | 2 | 2.61 | 0.11 | -6.16 |
| IPI00020008 | NEDD8 precursor                               | K.EIEIDIEPTDKVER.I             | 2 | 3.19 | 0.28 | -2.91 |
| IPI00020012 | Amyloid-like protein 1 precursor              | A.ALEGFLAALQADPPQAEV.V         | 2 | 4.42 | 0.31 | -2.13 |
| IPI00020012 | Amyloid-like protein 1 precursor              | A.DRQALNEHFQSILQTLQEEQVSGER.Q  | 3 | 5.03 | 0.43 | -3.54 |
| IPI00020012 | Amyloid-like protein 1 precursor              | A.PGSAQVAGLCGR.L               | 1 | 3.01 | 0.39 | -4.34 |
| IPI00020012 | Amyloid-like protein 1 precursor              | D.PSGTAVGDPSTR.S               | 2 | 3.50 | 0.41 | -2.79 |
| IPI00020012 | Amyloid-like protein 1 precursor              | E.IQRDELAPAGTGVSRE.E           | 2 | 3.73 | 0.34 | -1.89 |
| IPI00020012 | Amyloid-like protein 1 precursor              | F.HSSEIQRDELAPAGTGVSRE.E       | 3 | 4.16 | 0.36 | -3.34 |
| IPI00020012 | Amyloid-like protein 1 precursor              | F.LAALQADPPQAEV.V              | 2 | 3.36 | 0.26 | -2.23 |
| IPI00020012 | Amyloid-like protein 1 precursor              | G.SLAGGSPGAAEAPGSAQVAGLCGR.L   | 2 | 5.88 | 0.66 | -3.29 |
| IPI00020012 | Amyloid-like protein 1 precursor              | G.SLAGGSPGAAEAPGSAQVAGLCGR.L   | 3 | 4.79 | 0.50 | -3.22 |
| IPI00020012 | Amyloid-like protein 1 precursor              | I.GSLAGGSPGAAEAPGSAQVAGLCGR.L  | 2 | 5.34 | 0.53 | -3.16 |
| IPI00020012 | Amyloid-like protein 1 precursor              | I.GSLAGGSPGAAEAPGSAQVAGLCGR.L  | 3 | 4.09 | 0.45 | -2.81 |
| IPI00020012 | Amyloid-like protein 1 precursor              | K.ADRQALNEHFQSILQTLQEEQVSGER.Q | 2 | 4.38 | 0.53 | -3.72 |
| IPI00020012 | Amyloid-like protein 1 precursor              | K.ADRQALNEHFQSILQTLQEEQVSGER.Q | 3 | 7.19 | 0.57 | -5.08 |
| IPI00020012 | Amyloid-like protein 1 precursor              | K.ADRQALNEHFQSILQTLQEEQVSGER.Q | 4 | 2.82 | 0.19 | -4.90 |

|             |                                  |                                   |   |      |      |       |
|-------------|----------------------------------|-----------------------------------|---|------|------|-------|
| IPI00020012 | Amyloid-like protein 1 precursor | K.DDTPM*TLPK.G                    | 2 | 2.30 | 0.21 | -2.56 |
| IPI00020012 | Amyloid-like protein 1 precursor | K.EKM*NPLEQYER.K                  | 2 | 2.65 | 0.18 | -3.58 |
| IPI00020012 | Amyloid-like protein 1 precursor | K.GGLQPPDSKDDTPM*TLPK.G           | 2 | 2.93 | 0.31 | -3.00 |
| IPI00020012 | Amyloid-like protein 1 precursor | K.GGLQPPDSKDDTPM*TLPK.G           | 3 | 3.02 | 0.24 | -1.88 |
| IPI00020012 | Amyloid-like protein 1 precursor | K.GSTEQDAASPEKEK.M                | 2 | 3.89 | 0.32 | -3.42 |
| IPI00020012 | Amyloid-like protein 1 precursor | K.GSTEQDAASPEKEKM*NPLEQYER.K      | 2 | 3.06 | 0.41 | -2.67 |
| IPI00020012 | Amyloid-like protein 1 precursor | K.GSTEQDAASPEKEKM*NPLEQYER.K      | 3 | 3.25 | 0.26 | -2.68 |
| IPI00020012 | Amyloid-like protein 1 precursor | K.GSTEQDAASPEKEKM*NPLEQYER.K      | 4 | 2.00 | 0.35 | -2.26 |
| IPI00020012 | Amyloid-like protein 1 precursor | K.M*NPLEQYER.K                    | 1 | 1.66 | 0.24 | -2.38 |
| IPI00020012 | Amyloid-like protein 1 precursor | K.M*NPLEQYER.K                    | 2 | 3.13 | 0.26 | -4.45 |
| IPI00020012 | Amyloid-like protein 1 precursor | L.APAGTGVS.R.E                    | 1 | 2.16 | 0.27 | -2.49 |
| IPI00020012 | Amyloid-like protein 1 precursor | M.NPLEQYER.K                      | 1 | 2.17 | 0.19 | -3.81 |
| IPI00020012 | Amyloid-like protein 1 precursor | P.FHSSEIQR.D                      | 1 | 2.73 | 0.13 | -5.46 |
| IPI00020012 | Amyloid-like protein 1 precursor | P.FHSSEIQRDELAPAGTGVS.R.E         | 2 | 5.05 | 0.45 | -3.28 |
| IPI00020012 | Amyloid-like protein 1 precursor | P.FHSSEIQRDELAPAGTGVS.R.E         | 3 | 4.77 | 0.33 | -2.63 |
| IPI00020012 | Amyloid-like protein 1 precursor | P.KGSTEQDAASPEKEK.M               | 2 | 3.11 | 0.26 | -1.94 |
| IPI00020012 | Amyloid-like protein 1 precursor | Q.ALNEHFQSILQTLLEEQVSGER.Q        | 2 | 6.59 | 0.55 | -2.73 |
| IPI00020012 | Amyloid-like protein 1 precursor | Q.ALNEHFQSILQTLLEEQVSGER.Q        | 3 | 3.97 | 0.33 | -2.51 |
| IPI00020012 | Amyloid-like protein 1 precursor | R.AALEGFLAALQAD.P                 | 1 | 2.12 | 0.17 | -4.04 |
| IPI00020012 | Amyloid-like protein 1 precursor | R.AALEGFLAALQAD.P                 | 2 | 3.72 | 0.26 | -4.74 |
| IPI00020012 | Amyloid-like protein 1 precursor | R.AALEGFLAALQADPPQAER.V           | 2 | 4.92 | 0.46 | -5.73 |
| IPI00020012 | Amyloid-like protein 1 precursor | R.AALEGFLAALQADPPQAER.V           | 3 | 5.84 | 0.47 | -4.11 |
| IPI00020012 | Amyloid-like protein 1 precursor | R.AALEGFLAALQADPPQAER.V           | 4 | 3.80 | 0.16 | -1.41 |
| IPI00020012 | Amyloid-like protein 1 precursor | R.AKM*DLEER.R                     | 2 | 2.88 | 0.18 | -3.09 |
| IPI00020012 | Amyloid-like protein 1 precursor | R.CLPGFVSEALLVPEGCR.F             | 2 | 3.89 | 0.42 | -4.91 |
| IPI00020012 | Amyloid-like protein 1 precursor | R.CLPGFVSEALLVPEGCR.F             | 3 | 4.24 | 0.29 | -4.31 |
| IPI00020012 | Amyloid-like protein 1 precursor | R.DELAPAGTGVS.R.E                 | 1 | 2.49 | 0.25 | -3.43 |
| IPI00020012 | Amyloid-like protein 1 precursor | R.DELAPAGTGVS.R.E                 | 2 | 3.12 | 0.28 | -3.03 |
| IPI00020012 | Amyloid-like protein 1 precursor | R.DELAPAGTGVS.R.E.A               | 2 | 3.43 | 0.30 | -2.87 |
| IPI00020012 | Amyloid-like protein 1 precursor | R.EAVSGLLIM*GAGG.G                | 1 | 2.42 | 0.25 | -3.74 |
| IPI00020012 | Amyloid-like protein 1 precursor | R.EAVSGLLIM*GAGG.G                | 2 | 3.04 | 0.34 | -2.60 |
| IPI00020012 | Amyloid-like protein 1 precursor | R.EAVSGLLIM*GAGGGS.L              | 2 | 3.28 | 0.35 | -2.60 |
| IPI00020012 | Amyloid-like protein 1 precursor | R.EWAM*ADNQSK.N                   | 2 | 2.48 | 0.28 | -1.45 |
| IPI00020012 | Amyloid-like protein 1 precursor | R.FQVHHLQVIEER.V                  | 2 | 3.96 | 0.46 | -4.47 |
| IPI00020012 | Amyloid-like protein 1 precursor | R.FQVHHLQVIEER.V                  | 3 | 3.19 | 0.35 | -3.29 |
| IPI00020012 | Amyloid-like protein 1 precursor | R.GFPFHSSEIQ.R                    | 1 | 2.13 | 0.30 | -4.72 |
| IPI00020012 | Amyloid-like protein 1 precursor | R.GFPFHSSEIQ.R                    | 2 | 3.27 | 0.34 | -2.61 |
| IPI00020012 | Amyloid-like protein 1 precursor | R.GFPFHSSEIQR.D                   | 2 | 2.78 | 0.36 | -3.38 |
| IPI00020012 | Amyloid-like protein 1 precursor | R.GFPFHSSEIQRDELAPAGTGVS.R.E      | 2 | 4.10 | 0.39 | -4.71 |
| IPI00020012 | Amyloid-like protein 1 precursor | R.GFPFHSSEIQRDELAPAGTGVS.R.E      | 3 | 3.15 | 0.25 | -4.76 |
| IPI00020012 | Amyloid-like protein 1 precursor | R.HQEAQEACSSQGLILHGSGM*LLPCGSDR.F | 3 | 4.78 | 0.53 | -3.14 |
| IPI00020012 | Amyloid-like protein 1 precursor | R.HYQHVAAVDPEK.A                  | 2 | 3.41 | 0.46 | -4.18 |

|             |                                           |                                  |   |      |      |       |
|-------------|-------------------------------------------|----------------------------------|---|------|------|-------|
| IPI00020012 | Amyloid-like protein 1 precursor          | R.HYQHVAAVDPEKAQQM*R.F           | 3 | 3.21 | 0.30 | -3.21 |
| IPI00020012 | Amyloid-like protein 1 precursor          | R.HYQHVAAVDPEKAQQM*R.F           | 4 | 2.93 | 0.22 | -2.06 |
| IPI00020012 | Amyloid-like protein 1 precursor          | R.LVETHATR.V                     | 1 | 1.49 | 0.14 | -3.60 |
| IPI00020012 | Amyloid-like protein 1 precursor          | R.LVETHATR.V                     | 2 | 2.72 | 0.29 | -3.03 |
| IPI00020012 | Amyloid-like protein 1 precursor          | R.QALNEHFQSILQTLEEQ.V            | 2 | 3.55 | 0.32 | -3.86 |
| IPI00020012 | Amyloid-like protein 1 precursor          | R.QALNEHFQSILQTLEEQVS.G          | 2 | 3.42 | 0.34 | -5.24 |
| IPI00020012 | Amyloid-like protein 1 precursor          | R.QALNEHFQSILQTLEEQVSGE.R        | 2 | 4.82 | 0.46 | -3.56 |
| IPI00020012 | Amyloid-like protein 1 precursor          | R.QALNEHFQSILQTLEEQVSGER.Q       | 2 | 4.56 | 0.48 | -5.71 |
| IPI00020012 | Amyloid-like protein 1 precursor          | R.QALNEHFQSILQTLEEQVSGER.Q       | 3 | 5.58 | 0.49 | -5.68 |
| IPI00020012 | Amyloid-like protein 1 precursor          | R.QALNEHFQSILQTLEEQVSGER.Q       | 4 | 3.66 | 0.31 | -3.53 |
| IPI00020012 | Amyloid-like protein 1 precursor          | R.QALNEHFQSILQTLEEQVSGERQ.R      | 3 | 4.17 | 0.40 | -1.23 |
| IPI00020012 | Amyloid-like protein 1 precursor          | R.QINEVM*R.E                     | 2 | 1.89 | 0.10 | -3.21 |
| IPI00020012 | Amyloid-like protein 1 precursor          | R.QINEVM*REWAM*ADNQSK.N          | 2 | 2.54 | 0.13 |       |
| IPI00020012 | Amyloid-like protein 1 precursor          | R.QINEVM*REWAM*ADNQSK.N          | 3 | 2.31 | 0.23 | -3.23 |
| IPI00020012 | Amyloid-like protein 1 precursor          | R.QM*YPELQIAR.V                  | 2 | 2.37 | 0.29 | -3.84 |
| IPI00020012 | Amyloid-like protein 1 precursor          | R.QRLVETHATR.V                   | 2 | 2.60 | 0.11 | -2.75 |
| IPI00020012 | Amyloid-like protein 1 precursor          | R.RAALEGFLAALQAD.P               | 2 | 2.94 | 0.23 | -1.90 |
| IPI00020012 | Amyloid-like protein 1 precursor          | R.RAALEGFLAALQADPPQAER.V         | 3 | 5.14 | 0.43 | -3.99 |
| IPI00020012 | Amyloid-like protein 1 precursor          | R.RAALEGFLAALQADPPQAER.V         | 4 | 3.24 | 0.36 | -1.37 |
| IPI00020012 | Amyloid-like protein 1 precursor          | R.VEQATQAIPM*ER.W                | 2 | 3.92 | 0.39 | -5.36 |
| IPI00020012 | Amyloid-like protein 1 precursor          | R.VEQATQAIPM*ER.W                | 3 | 2.92 | 0.10 | -3.29 |
| IPI00020012 | Amyloid-like protein 1 precursor          | R.VIALINDQR.R                    | 2 | 3.39 | 0.06 | -2.90 |
| IPI00020012 | Amyloid-like protein 1 precursor          | R.VIALINDQRR.A                   | 2 | 2.56 | 0.06 | -2.87 |
| IPI00020012 | Amyloid-like protein 1 precursor          | R.VLEYCR.Q                       | 1 | 1.32 | 0.11 | -2.36 |
| IPI00020012 | Amyloid-like protein 1 precursor          | R.WEPDPQR.S                      | 2 | 1.75 | 0.09 | -2.55 |
| IPI00020012 | Amyloid-like protein 1 precursor          | R.YLRAEQKEQR.H                   | 3 | 2.37 | 0.21 | -3.06 |
| IPI00020012 | Amyloid-like protein 1 precursor          | S.EIQRDELAPAGTGVS.R              | 2 | 4.12 | 0.38 | -1.14 |
| IPI00020012 | Amyloid-like protein 1 precursor          | S.PGAAEAPGSAQVAGLCGR.L           | 2 | 4.07 | 0.53 | -3.66 |
| IPI00020012 | Amyloid-like protein 1 precursor          | V.EQATQAIPM*ER.W                 | 2 | 2.93 | 0.23 | -1.75 |
| IPI00020019 | Adiponectin precursor                     | R.NGLYADNDNDSTFTGFLLYHDTN.-      | 2 | 5.49 | 0.56 | -2.39 |
| IPI00020058 | Isoform 1 of Copper-transporting ATPase 2 | K.GGKPLEMAHKIKTVMFDKGTITHGVPR.V  | 3 | 3.24 | 0.16 |       |
| IPI00020091 | Alpha-1-acid glycoprotein 2 precursor     | K.EQLGEFYEALDCLCIPR.S            | 2 | 5.58 | 0.49 |       |
| IPI00020091 | Alpha-1-acid glycoprotein 2 precursor     | K.EQLGEFYEALDCLCIPR.S            | 3 | 5.02 | 0.22 |       |
| IPI00020091 | Alpha-1-acid glycoprotein 2 precursor     | K.SVQEIQATFFYFTPNKTEDTIFLR.E     | 3 | 2.94 | 0.14 |       |
| IPI00020091 | Alpha-1-acid glycoprotein 2 precursor     | K.TEDTIFLR.E                     | 1 | 1.64 | 0.11 |       |
| IPI00020091 | Alpha-1-acid glycoprotein 2 precursor     | K.TLM*FGSYLDDEK.N                | 2 | 3.73 | 0.43 |       |
| IPI00020091 | Alpha-1-acid glycoprotein 2 precursor     | K.TLM*FGSYLDDEKNWGLSFYADKPETTK.E | 2 | 4.80 | 0.43 |       |
| IPI00020091 | Alpha-1-acid glycoprotein 2 precursor     | K.TLM*FGSYLDDEKNWGLSFYADKPETTK.E | 3 | 5.05 | 0.49 |       |
| IPI00020091 | Alpha-1-acid glycoprotein 2 precursor     | K.TLMFGSYLDDEK.N                 | 2 | 3.90 | 0.36 |       |
| IPI00020091 | Alpha-1-acid glycoprotein 2 precursor     | K.TLMFGSYLDDEKNWGLSFYADKPETTK.E  | 3 | 4.48 | 0.30 |       |
| IPI00020091 | Alpha-1-acid glycoprotein 2 precursor     | K.WFYIASAFR.N                    | 1 | 2.66 | 0.25 |       |
| IPI00020091 | Alpha-1-acid glycoprotein 2 precursor     | K.WFYIASAFR.N                    | 2 | 2.37 | 0.31 | -1.54 |

|             |                                                                             |                                              |   |      |      |       |
|-------------|-----------------------------------------------------------------------------|----------------------------------------------|---|------|------|-------|
| IPI00020091 | Alpha-1-acid glycoprotein 2 precursor                                       | K.WFYIASAFRNEEYNK.S                          | 2 | 4.39 | 0.40 |       |
| IPI00020091 | Alpha-1-acid glycoprotein 2 precursor                                       | R.EHVAHLLFLR.D                               | 2 | 3.42 | 0.31 |       |
| IPI00020091 | Alpha-1-acid glycoprotein 2 precursor                                       | R.QNQCIFYNSSYLNVQR.E                         | 2 | 4.06 | 0.28 |       |
| IPI00020091 | Alpha-1-acid glycoprotein 2 precursor                                       | R.SDVM*YTDWK.K                               | 1 | 2.83 | 0.15 |       |
| IPI00020091 | Alpha-1-acid glycoprotein 2 precursor                                       | R.SDVM*YTDWK.K                               | 2 | 3.66 | 0.27 |       |
| IPI00020091 | Alpha-1-acid glycoprotein 2 precursor                                       | R.SDVM*YTDWKK.D                              | 1 | 2.97 | 0.30 |       |
| IPI00020091 | Alpha-1-acid glycoprotein 2 precursor                                       | R.SDVM*YTDWKK.D                              | 2 | 3.30 | 0.27 |       |
| IPI00020091 | Alpha-1-acid glycoprotein 2 precursor                                       | R.SDVM*YTDWKK.D                              | 3 | 2.81 | 0.21 |       |
| IPI00020091 | Alpha-1-acid glycoprotein 2 precursor                                       | R.SDVMYTDWK.K                                | 2 | 2.72 | 0.22 |       |
| IPI00020091 | Alpha-1-acid glycoprotein 2 precursor                                       | R.SDVMYTDWKK.D                               | 2 | 3.00 | 0.35 |       |
| IPI00020091 | Alpha-1-acid glycoprotein 2 precursor                                       | R.YEGGREHVAHLLFLR.D                          | 2 | 4.03 | 0.20 |       |
| IPI00020131 | Son of sevenless homolog 1                                                  | K.GKQLAIKKM*NEIQK.N                          | 2 | 4.41 | 0.10 |       |
| IPI00020199 | Alpha-2,8-sialyltransferase 8B                                              | R.SAVNSLHSK.S                                | 2 | 2.13 | 0.05 | -2.34 |
| IPI00020201 | CMP-N-acetylneuraminate-poly-alpha-2,8-sialyltransferase                    | K.SSFKPGDVIHYVLDR.R                          | 3 | 2.88 | 0.11 | -3.76 |
| IPI00020329 | Potassium voltage-gated channel subfamily S member 2                        | R.SLGATLK.Y                                  | 1 | 1.68 | 0.05 | -3.46 |
| IPI00020356 | 331 kDa protein                                                             | R.KTLYKAK.V                                  | 2 | 1.88 | 0.07 | -3.00 |
| IPI00020396 | Isoform PACE4A-I of Proprotein convertase subtilisin/kexin type 6 precursor | A.SYDVNGNDYDPSPR.Y                           | 2 | 3.52 | 0.52 | -3.15 |
| IPI00020396 | Isoform PACE4A-I of Proprotein convertase subtilisin/kexin type 6 precursor | L.DGDVTDVVEAK.S                              | 2 | 3.66 | 0.31 | -1.20 |
| IPI00020396 | Isoform PACE4A-I of Proprotein convertase subtilisin/kexin type 6 precursor | T.ILDDGIER.N                                 | 2 | 3.02 | 0.19 | -3.22 |
| IPI00020407 | Alpha-1,6-mannosylglycoprotein 6-beta-N-acetylglucosaminyltransferase A     | K.TLAVLLDNILQR.I                             | 2 | 3.21 | 0.26 | -3.71 |
| IPI00020407 | Alpha-1,6-mannosylglycoprotein 6-beta-N-acetylglucosaminyltransferase A     | R.TQPESSTM*LR.E                              | 2 | 1.48 | 0.13 | -2.71 |
| IPI00020431 | Isoform 1 of TGF-beta receptor type-2 precursor                             | K.LPYHDFILEDAAASP.K.C                        | 2 | 3.66 | 0.25 | -3.59 |
| IPI00020431 | Isoform 1 of TGF-beta receptor type-2 precursor                             | K.LPYHDFILEDAAASP.K.C                        | 3 | 2.57 | 0.06 | -1.21 |
| IPI00020470 | Isoform 1 of Glycosyltransferase 8 domain-containing protein 1              | K.WM*KLNVEEGLYSR.T                           | 2 | 2.90 | 0.08 |       |
| IPI00020501 | Myosin-11                                                                   | R.NTDQASM*PDNTAAQK.V                         | 2 | 2.86 | 0.37 | -3.01 |
| IPI00020557 | Prolow-density lipoprotein receptor-related protein 1 precursor             | K.ADGSGSVVLR.N                               | 2 | 3.20 | 0.21 | -2.14 |
| IPI00020557 | Prolow-density lipoprotein receptor-related protein 1 precursor             | K.AKNEPVDPRPPVLLIANSQNILATYLSGAQVSTITPTSTR.Q | 3 | 6.68 | 0.61 | -3.71 |
| IPI00020557 | Prolow-density lipoprotein receptor-related protein 1 precursor             | K.ATALAIM*GDK.L                              | 2 | 2.49 | 0.08 | -4.49 |
| IPI00020557 | Prolow-density lipoprotein receptor-related protein 1 precursor             | K.AVTDEEPFLIFANR.Y                           | 2 | 3.62 | 0.35 | -0.35 |

|             |                                                                 |                                           |   |      |      |       |
|-------------|-----------------------------------------------------------------|-------------------------------------------|---|------|------|-------|
| IPI00020557 | Prolow-density lipoprotein receptor-related protein 1 precursor | K.CLCVEGYAPR.G                            | 2 | 3.30 | 0.32 | -2.48 |
| IPI00020557 | Prolow-density lipoprotein receptor-related protein 1 precursor | K.GIALDPAM*GK.V                           | 1 | 1.87 | 0.17 | -1.12 |
| IPI00020557 | Prolow-density lipoprotein receptor-related protein 1 precursor | K.GIALDPAM*GK.V                           | 2 | 2.49 | 0.20 | -1.40 |
| IPI00020557 | Prolow-density lipoprotein receptor-related protein 1 precursor | K.GPVGLAIDFPESK.L                         | 2 | 4.47 | 0.45 | -2.54 |
| IPI00020557 | Prolow-density lipoprotein receptor-related protein 1 precursor | K.GYLFWTEWGQYPR.I                         | 2 | 3.83 | 0.42 | -4.60 |
| IPI00020557 | Prolow-density lipoprotein receptor-related protein 1 precursor | K.IETAAM*DGTLR.E                          | 2 | 3.60 | 0.34 | -1.12 |
| IPI00020557 | Prolow-density lipoprotein receptor-related protein 1 precursor | K.ITWPNGLTLDYVTER.I                       | 2 | 2.95 | 0.34 | -3.20 |
| IPI00020557 | Prolow-density lipoprotein receptor-related protein 1 precursor | K.IVFPHGITLDLVSRL                         | 3 | 3.58 | 0.45 | -1.26 |
| IPI00020557 | Prolow-density lipoprotein receptor-related protein 1 precursor | K.KPEHELFLVYGK.G                          | 2 | 2.66 | 0.36 | -3.62 |
| IPI00020557 | Prolow-density lipoprotein receptor-related protein 1 precursor | K.KPEHELFLVYGK.G                          | 3 | 3.09 | 0.28 | -2.32 |
| IPI00020557 | Prolow-density lipoprotein receptor-related protein 1 precursor | K.LSVIGSIR.L                              | 2 | 2.58 | 0.13 | -2.32 |
| IPI00020557 | Prolow-density lipoprotein receptor-related protein 1 precursor | K.LWWADQVSEK.M                            | 2 | 2.56 | 0.18 | -0.59 |
| IPI00020557 | Prolow-density lipoprotein receptor-related protein 1 precursor | K.LYFSDATLDKIER.C                         | 2 | 3.52 | 0.38 | -2.60 |
| IPI00020557 | Prolow-density lipoprotein receptor-related protein 1 precursor | K.NAVVQGLEQPHGLVVHPLR.G                   | 2 | 5.57 | 0.50 | -1.29 |
| IPI00020557 | Prolow-density lipoprotein receptor-related protein 1 precursor | K.NAVVQGLEQPHGLVVHPLR.G                   | 3 | 3.23 | 0.43 | -1.06 |
| IPI00020557 | Prolow-density lipoprotein receptor-related protein 1 precursor | K.NAVVQGLEQPHGLVVHPLR.G                   | 4 | 2.67 | 0.19 | -1.77 |
| IPI00020557 | Prolow-density lipoprotein receptor-related protein 1 precursor | K.NEPVDRPPVLLIANSQNILATYLSGAQVSTITPTSTR.Q | 3 | 6.05 | 0.50 | -3.95 |
| IPI00020557 | Prolow-density lipoprotein receptor-related protein 1 precursor | K.NVIALAFDYR.A                            | 2 | 3.68 | 0.44 | -3.85 |
| IPI00020557 | Prolow-density lipoprotein receptor-related protein 1 precursor | K.TLISGM*IDEPHAIVVDPLR.G                  | 3 | 3.46 | 0.34 | -2.52 |
| IPI00020557 | Prolow-density lipoprotein receptor-related protein 1 precursor | K.TVLWPNGLSLDIPAGR.L                      | 2 | 4.39 | 0.42 | -5.10 |
| IPI00020557 | Prolow-density lipoprotein receptor-related protein 1 precursor | K.VFFTDYGGQIPK.V                          | 2 | 4.35 | 0.45 | -3.76 |

|             |                                                                 |                               |   |      |      |       |
|-------------|-----------------------------------------------------------------|-------------------------------|---|------|------|-------|
| IPI00020557 | Prolow-density lipoprotein receptor-related protein 1 precursor | K.VPDEHM*IPIENLM*NPR.A        | 2 | 3.67 | 0.50 | -3.73 |
| IPI00020557 | Prolow-density lipoprotein receptor-related protein 1 precursor | K.VPDEHM*IPIENLM*NPR.A        | 3 | 4.05 | 0.34 | -2.43 |
| IPI00020557 | Prolow-density lipoprotein receptor-related protein 1 precursor | K.VYDESIQLDHK.G               | 2 | 3.32 | 0.39 | -2.59 |
| IPI00020557 | Prolow-density lipoprotein receptor-related protein 1 precursor | K.VYDESIQLDHK.G               | 3 | 1.61 | 0.12 | -1.33 |
| IPI00020557 | Prolow-density lipoprotein receptor-related protein 1 precursor | R.AALSGANVLTIEK.D             | 2 | 4.56 | 0.38 | -3.48 |
| IPI00020557 | Prolow-density lipoprotein receptor-related protein 1 precursor | R.AALSGANVLTIEKDIR.T          | 3 | 2.80 | 0.37 | -1.83 |
| IPI00020557 | Prolow-density lipoprotein receptor-related protein 1 precursor | R.AITVHPEK.G                  | 2 | 1.91 | 0.18 | -0.78 |
| IPI00020557 | Prolow-density lipoprotein receptor-related protein 1 precursor | R.AIVVDPLNGWM*YWTDWEEDPKDSR.R | 3 | 3.45 | 0.46 | -3.82 |
| IPI00020557 | Prolow-density lipoprotein receptor-related protein 1 precursor | R.CLPGFLGDR.C                 | 2 | 2.33 | 0.26 | -0.24 |
| IPI00020557 | Prolow-density lipoprotein receptor-related protein 1 precursor | R.CNLDGSGLEVIDAM*R.S          | 2 | 5.00 | 0.51 | -1.89 |
| IPI00020557 | Prolow-density lipoprotein receptor-related protein 1 precursor | R.CTAYFEGSR.C                 | 2 | 2.49 | 0.19 | -1.35 |
| IPI00020557 | Prolow-density lipoprotein receptor-related protein 1 precursor | R.DGILFWTDWDASLPR.I           | 2 | 4.44 | 0.47 | -6.77 |
| IPI00020557 | Prolow-density lipoprotein receptor-related protein 1 precursor | R.DQITCISK.G                  | 2 | 2.18 | 0.07 | -2.57 |
| IPI00020557 | Prolow-density lipoprotein receptor-related protein 1 precursor | R.DQWREDVVTNGIGR.V            | 3 | 3.91 | 0.28 | -0.91 |
| IPI00020557 | Prolow-density lipoprotein receptor-related protein 1 precursor | R.EDVVTNGIGR.V                | 2 | 3.14 | 0.29 | -2.45 |
| IPI00020557 | Prolow-density lipoprotein receptor-related protein 1 precursor | R.ETLVQDNIQWPTGLAVDYHNER.L    | 3 | 3.13 | 0.12 | -4.66 |
| IPI00020557 | Prolow-density lipoprotein receptor-related protein 1 precursor | R.ETVITM*SGDDHPR.A            | 2 | 3.53 | 0.41 | -0.67 |
| IPI00020557 | Prolow-density lipoprotein receptor-related protein 1 precursor | R.GVGGAPPTVTLR.S              | 2 | 3.04 | 0.38 | -1.80 |
| IPI00020557 | Prolow-density lipoprotein receptor-related protein 1 precursor | R.IDLETGENR.E                 | 2 | 3.05 | 0.22 | -3.15 |
| IPI00020557 | Prolow-density lipoprotein receptor-related protein 1 precursor | R.IDLHKGDYSVLVPLR.N           | 2 | 3.61 | 0.43 | -4.30 |
| IPI00020557 | Prolow-density lipoprotein receptor-related protein 1 precursor | R.IDLHKGDYSVLVPLR.N           | 3 | 3.44 | 0.21 | -3.11 |

|             |                                                                 |                            |   |      |      |       |
|-------------|-----------------------------------------------------------------|----------------------------|---|------|------|-------|
| IPI00020557 | Prolow-density lipoprotein receptor-related protein 1 precursor | R.IEAASM*SGAGR.R           | 2 | 4.05 | 0.34 | -2.31 |
| IPI00020557 | Prolow-density lipoprotein receptor-related protein 1 precursor | R.IFFSDIHFGNIQQINDDGSR.R   | 2 | 4.84 | 0.55 | -3.63 |
| IPI00020557 | Prolow-density lipoprotein receptor-related protein 1 precursor | R.IFFSDIHFGNIQQINDDGSR.R   | 3 | 4.13 | 0.40 | -1.86 |
| IPI00020557 | Prolow-density lipoprotein receptor-related protein 1 precursor | R.IFFSDIHFGNIQQINDDGSR.R.I | 3 | 2.70 | 0.18 | -2.03 |
| IPI00020557 | Prolow-density lipoprotein receptor-related protein 1 precursor | R.ITIVENVGSVEGLAYHR.G      | 3 | 2.61 | 0.19 | -2.33 |
| IPI00020557 | Prolow-density lipoprotein receptor-related protein 1 precursor | R.LDGLCIPLR.W              | 2 | 2.24 | 0.06 | -1.59 |
| IPI00020557 | Prolow-density lipoprotein receptor-related protein 1 precursor | R.M*YDAQQQVGTNK.C          | 2 | 4.93 | 0.51 | -3.17 |
| IPI00020557 | Prolow-density lipoprotein receptor-related protein 1 precursor | R.M*YDAQQQVGTNK.C          | 3 | 2.93 | 0.27 | -5.19 |
| IPI00020557 | Prolow-density lipoprotein receptor-related protein 1 precursor | R.NLNAPVQPFEDPEHM*K.N      | 2 | 3.84 | 0.53 | -1.99 |
| IPI00020557 | Prolow-density lipoprotein receptor-related protein 1 precursor | R.NLNAPVQPFEDPEHM*K.N      | 3 | 2.07 | 0.17 | -2.43 |
| IPI00020557 | Prolow-density lipoprotein receptor-related protein 1 precursor | R.RITIVENVGSVEGLAYHR.G     | 3 | 5.53 | 0.48 | -1.38 |
| IPI00020557 | Prolow-density lipoprotein receptor-related protein 1 precursor | R.SERPPIFEIR.M             | 3 | 2.92 | 0.27 | -3.91 |
| IPI00020557 | Prolow-density lipoprotein receptor-related protein 1 precursor | R.SGFSLGSDGK.S             | 2 | 3.06 | 0.35 | -2.49 |
| IPI00020557 | Prolow-density lipoprotein receptor-related protein 1 precursor | R.SGSVYRLER.G              | 2 | 2.08 | 0.07 | -2.04 |
| IPI00020557 | Prolow-density lipoprotein receptor-related protein 1 precursor | R.SLDPFKPFIIFSN.R          | 2 | 3.09 | 0.32 | -4.59 |
| IPI00020557 | Prolow-density lipoprotein receptor-related protein 1 precursor | R.SLDPFKPFIIFSNR.H         | 2 | 3.32 | 0.42 | -3.01 |
| IPI00020557 | Prolow-density lipoprotein receptor-related protein 1 precursor | R.SLDPFKPFIIFSNR.H         | 3 | 3.39 | 0.26 | -2.17 |
| IPI00020557 | Prolow-density lipoprotein receptor-related protein 1 precursor | R.TLLFSGQK.G               | 1 | 1.42 | 0.11 | -2.61 |
| IPI00020557 | Prolow-density lipoprotein receptor-related protein 1 precursor | R.TNTQPFDLQVYHPSR.Q        | 2 | 3.71 | 0.40 | -3.17 |
| IPI00020557 | Prolow-density lipoprotein receptor-related protein 1 precursor | R.TNTQPFDLQVYHPSR.Q        | 3 | 2.18 | 0.12 | -2.87 |
| IPI00020557 | Prolow-density lipoprotein receptor-related protein 1 precursor | R.TLLAGDIEHPR.A            | 2 | 3.57 | 0.34 | -0.85 |



|             |                                                                 |                                      |   |      |      |       |
|-------------|-----------------------------------------------------------------|--------------------------------------|---|------|------|-------|
| IPI00020557 | Prolow-density lipoprotein receptor-related protein 1 precursor | R.VDKGGALHIYHQR.R                    | 2 | 3.79 | 0.31 | -4.77 |
| IPI00020557 | Prolow-density lipoprotein receptor-related protein 1 precursor | R.VDKGGALHIYHQR.R                    | 3 | 2.86 | 0.26 | -2.32 |
| IPI00020557 | Prolow-density lipoprotein receptor-related protein 1 precursor | R.VYWSDVR.T                          | 2 | 2.17 | 0.17 | -0.92 |
| IPI00020557 | Prolow-density lipoprotein receptor-related protein 1 precursor | R.YDGSGHM*EVL.R.G                    | 2 | 2.43 | 0.21 | -4.27 |
| IPI00020557 | Prolow-density lipoprotein receptor-related protein 1 precursor | R.YVVISQGLDKPR.A                     | 2 | 3.09 | 0.33 | -2.60 |
| IPI00020599 | Calreticulin precursor                                          | K.EQFLDGDGWTSR.W                     | 2 | 3.35 | 0.31 | -3.66 |
| IPI00020599 | Calreticulin precursor                                          | K.FVLSSGK.F                          | 1 | 1.79 | 0.13 | -2.44 |
| IPI00020599 | Calreticulin precursor                                          | K.FVLSSGKFGYDDEEKDKGLQTSQDAR.F       | 3 | 5.07 | 0.36 | -4.05 |
| IPI00020599 | Calreticulin precursor                                          | K.FVLSSGKFGYDDEEKDKGLQTSQDAR.F       | 4 | 3.10 | 0.24 | -4.51 |
| IPI00020599 | Calreticulin precursor                                          | K.FYGDEEKDK.G                        | 2 | 2.24 | 0.19 | -1.99 |
| IPI00020599 | Calreticulin precursor                                          | K.FYGDEEKDKGLQTSQDAR.F               | 2 | 4.99 | 0.46 | -1.75 |
| IPI00020599 | Calreticulin precursor                                          | K.FYGDEEKDKGLQTSQDAR.F               | 3 | 3.56 | 0.33 | -2.85 |
| IPI00020599 | Calreticulin precursor                                          | K.GKNVLINKDIR.C                      | 2 | 2.92 | 0.14 | -4.85 |
| IPI00020599 | Calreticulin precursor                                          | K.GLQTSQDAR.F                        | 2 | 2.35 | 0.06 | -1.57 |
| IPI00020599 | Calreticulin precursor                                          | K.LFPNSLDQTD*HGDSEYNIM*FGPDICGPGTK.K | 3 | 4.49 | 0.50 | -3.59 |
| IPI00020599 | Calreticulin precursor                                          | K.NVLINKDIR.C                        | 2 | 2.58 | 0.15 | -1.44 |
| IPI00020599 | Calreticulin precursor                                          | K.SDFGK FVLSSGK.F                    | 2 | 3.46 | 0.38 | -2.60 |
| IPI00020599 | Calreticulin precursor                                          | K.SDFGK FVLSSGKFGYDDEEKDKGLQTSQDAR.F | 4 | 3.64 | 0.29 | -4.07 |
| IPI00020599 | Calreticulin precursor                                          | K.SGTIFDNFLITNDEAYAEFGNETWGVTK.A     | 3 | 6.21 | 0.57 | -3.60 |
| IPI00020599 | Calreticulin precursor                                          | K.VHVIFNYK.G                         | 1 | 2.78 | 0.26 | -4.17 |
| IPI00020599 | Calreticulin precursor                                          | R.CKDDEFTHLYTLIVRPDNTYEVK.I          | 3 | 4.62 | 0.39 | -2.31 |
| IPI00020599 | Calreticulin precursor                                          | R.CKDDEFTHLYTLIVRPDNTYEVK.I          | 4 | 3.53 | 0.25 | -3.11 |
| IPI00020599 | Calreticulin precursor                                          | R.CKDDEFTHLYTLIVRPDNTYEVK.I          | 5 | 2.23 | 0.12 | -3.10 |
| IPI00020599 | Calreticulin precursor                                          | R.FYALSASFEPFSNK.G                   | 2 | 5.01 | 0.55 | -5.23 |
| IPI00020599 | Calreticulin precursor                                          | R.QIDNPDYK.G                         | 1 | 2.31 | 0.09 | -3.18 |
| IPI00020599 | Calreticulin precursor                                          | R.QIDNPDYK.G                         | 2 | 2.02 | 0.16 | -2.52 |
| IPI00020672 | Isoform 1 of Dipeptidyl-peptidase 3                             | R.LEGSDVQLLEYEASAAGLR.S              | 3 | 3.84 | 0.33 | -4.90 |
| IPI00020672 | Isoform 1 of Dipeptidyl-peptidase 3                             | R.LFKEVDGEGKPYEVR.L                  | 4 | 2.76 | 0.23 | -2.81 |
| IPI00020672 | Isoform 1 of Dipeptidyl-peptidase 3                             | R.SFSERFPEDGPELEEILTQLATADAR.F       | 3 | 4.14 | 0.32 | -4.51 |
| IPI00020672 | Isoform 1 of Dipeptidyl-peptidase 3                             | R.VILGSEAAQQHPPEVR.G                 | 3 | 2.05 | 0.14 | -1.44 |
| IPI00020672 | Isoform 1 of Dipeptidyl-peptidase 3                             | R.VLLEAGEGLVTITPTTGSDGRPDAR.V        | 3 | 3.79 | 0.44 | -2.86 |
| IPI00020692 | Isoform 1 of Sodium channel protein type 3 subunit alpha        | K.IDSCM*SNNTGIEISKELNYLR.D           | 2 | 2.21 | 0.10 | 0.28  |
| IPI00020692 | Isoform 1 of Sodium channel protein type 3 subunit alpha        | R.DGNGTTSVGTGSSVEK.Y                 | 2 | 2.32 | 0.24 |       |
| IPI00020747 | Sodium channel subunit beta-3 precursor                         | P.VCVEVPSETEAVQGNPM*K.L              | 2 | 5.49 | 0.50 | -4.72 |
| IPI00020747 | Sodium channel subunit beta-3 precursor                         | R.EFEFEAHRPFVK.T                     | 2 | 3.27 | 0.38 | -1.37 |

|             |                                                                             |                                 |   |      |      |       |
|-------------|-----------------------------------------------------------------------------|---------------------------------|---|------|------|-------|
| IPI00020747 | Sodium channel subunit beta-3 precursor                                     | R.NGHQEVESPFQGR.L               | 2 | 3.23 | 0.42 | -4.41 |
| IPI00020884 | Plexin-A3 precursor                                                         | K.SEYFPTLSSR.K                  | 2 | 2.11 | 0.17 | -2.33 |
| IPI00020884 | Plexin-A3 precursor                                                         | R.AHVTGVPVEDNAR.C               | 2 | 2.92 | 0.14 | -3.78 |
| IPI00020906 | Inositol monophosphatase                                                    | K.EIQVIPLQRDDED.-               | 2 | 2.39 | 0.14 | -2.45 |
| IPI00020906 | Inositol monophosphatase                                                    | K.LQVSQQEDITK.S                 | 2 | 3.64 | 0.33 | -1.15 |
| IPI00020906 | Inositol monophosphatase                                                    | K.SILTDNPTWIIDPIDGTTNFVHR.F     | 3 | 3.33 | 0.19 | -6.74 |
| IPI00020906 | Inositol monophosphatase                                                    | K.SLLVTELGSSR.T                 | 2 | 2.93 | 0.34 | -2.26 |
| IPI00020906 | Inositol monophosphatase                                                    | K.SSPVDLVTATDQKVEK.M            | 2 | 3.15 | 0.24 | -2.42 |
| IPI00020966 | Isoform 1 of Phosphatidylinositol N-acetylglucosaminyltransferase subunit A | C.RGGAGNGHR.A                   | 2 | 2.91 | 0.24 | -2.59 |
| IPI00020977 | Isoform 1 of Connective tissue growth factor precursor                      | K.DGAPCIFGGTVYR.S               | 2 | 3.94 | 0.47 | -4.31 |
| IPI00020977 | Isoform 1 of Connective tissue growth factor precursor                      | R.LPSPDCPFPR.R                  | 2 | 2.53 | 0.19 | -3.13 |
| IPI00020977 | Isoform 1 of Connective tissue growth factor precursor                      | R.SGESFQSSCK.Y                  | 2 | 2.40 | 0.28 | -0.66 |
| IPI00020984 | Calnexin precursor                                                          | K.APVPTGEVYFADSFDR.G            | 2 | 4.47 | 0.56 | -3.98 |
| IPI00020984 | Calnexin precursor                                                          | K.LPGDKGLVLM*SR.A               | 3 | 2.44 | 0.17 | -2.18 |
| IPI00020984 | Calnexin precursor                                                          | R.GTLSGWILSK.A                  | 2 | 3.27 | 0.22 | -0.63 |
| IPI00020984 | Calnexin precursor                                                          | R.KIPNPDDFFEDLEPFR.M            | 3 | 4.71 | 0.26 | -2.38 |
| IPI00020986 | Lumican precursor                                                           | K.ILGPLSYSK.I                   | 1 | 1.85 | 0.07 | -1.26 |
| IPI00020986 | Lumican precursor                                                           | K.ISNIPDEYFK.R                  | 1 | 2.36 | 0.20 | -3.40 |
| IPI00020986 | Lumican precursor                                                           | K.ISNIPDEYFK.R                  | 2 | 3.21 | 0.14 | -2.64 |
| IPI00020986 | Lumican precursor                                                           | K.ISNIPDEYFKR.F                 | 2 | 3.13 | 0.28 | -3.06 |
| IPI00020986 | Lumican precursor                                                           | K.ISNIPDEYFKR.F                 | 3 | 2.98 | 0.13 | -3.53 |
| IPI00020986 | Lumican precursor                                                           | K.LKNIPTVNENLENYYLEVNQLEK.F     | 3 | 3.52 | 0.28 | -3.99 |
| IPI00020986 | Lumican precursor                                                           | K.LKNIPTVNENLENYYLEVNQLEKFDIK.S | 4 | 3.74 | 0.23 | -4.27 |
| IPI00020986 | Lumican precursor                                                           | K.NIPTVNENLENYYLEVNQLEK.F       | 2 | 5.64 | 0.51 | -4.32 |
| IPI00020986 | Lumican precursor                                                           | K.NIPTVNENLENYYLEVNQLEK.F       | 3 | 4.39 | 0.30 | -3.14 |
| IPI00020986 | Lumican precursor                                                           | K.NIPTVNENLENYYLEVNQLEKFDIK.S   | 2 | 4.14 | 0.43 | -0.59 |
| IPI00020986 | Lumican precursor                                                           | K.NIPTVNENLENYYLEVNQLEKFDIK.S   | 3 | 2.51 | 0.09 | -3.18 |
| IPI00020986 | Lumican precursor                                                           | K.RFNALQYLR.L                   | 2 | 2.52 | 0.16 | -3.65 |
| IPI00020986 | Lumican precursor                                                           | K.SLEDLQLTHNK.I                 | 1 | 2.67 | 0.32 | -2.59 |
| IPI00020986 | Lumican precursor                                                           | K.SLEDLQLTHNK.I                 | 2 | 3.86 | 0.37 | -2.71 |
| IPI00020986 | Lumican precursor                                                           | K.SLEDLQLTHNK.I                 | 3 | 2.05 | 0.19 | -3.01 |
| IPI00020986 | Lumican precursor                                                           | K.SLEDLQLTHNKITK.L              | 2 | 4.05 | 0.43 | -1.12 |
| IPI00020986 | Lumican precursor                                                           | K.SLEDLQLTHNKITK.L              | 3 | 2.07 | 0.26 | -2.07 |
| IPI00020986 | Lumican precursor                                                           | K.SLEYLDLSFNQIAR.L              | 2 | 4.87 | 0.41 | -6.39 |
| IPI00020986 | Lumican precursor                                                           | K.SLEYLDLSFNQIAR.L              | 3 | 5.77 | 0.44 | -3.03 |
| IPI00020986 | Lumican precursor                                                           | K.SVPM*VPPGIK.Y                 | 1 | 1.49 | 0.16 | -2.08 |
| IPI00020986 | Lumican precursor                                                           | K.SVPM*VPPGIK.Y                 | 2 | 1.54 | 0.13 | -0.53 |
| IPI00020986 | Lumican precursor                                                           | R.FNALQYLR.L                    | 1 | 2.47 | 0.12 | -1.86 |

|             |                                                                                |                                   |   |      |      |       |
|-------------|--------------------------------------------------------------------------------|-----------------------------------|---|------|------|-------|
| IPI00020986 | Lumican precursor                                                              | R.FNALQYLR.L                      | 2 | 3.27 | 0.25 | -1.08 |
| IPI00020986 | Lumican precursor                                                              | R.ISETSLPPDM*YECLR.V              | 2 | 3.13 | 0.35 | -4.09 |
| IPI00020986 | Lumican precursor                                                              | R.LKEDAVSAAFK.G                   | 1 | 2.75 | 0.40 | -4.21 |
| IPI00020986 | Lumican precursor                                                              | R.LKEDAVSAAFK.G                   | 2 | 3.68 | 0.37 | -3.15 |
| IPI00020986 | Lumican precursor                                                              | R.LPSGLPVSLLLTYLDNNK.I            | 2 | 5.67 | 0.59 | -5.83 |
| IPI00020986 | Lumican precursor                                                              | R.LPSGLPVSLLLTYLDNNK.I            | 3 | 5.64 | 0.40 | -3.80 |
| IPI00020986 | Lumican precursor                                                              | R.LPSGLPVSLLLTYLDNNKISNIPDEYFK.R  | 3 | 5.74 | 0.56 | -4.08 |
| IPI00020986 | Lumican precursor                                                              | R.LPSGLPVSLLLTYLDNNKISNIPDEYFK.R  | 4 | 3.56 | 0.31 | -3.40 |
| IPI00020986 | Lumican precursor                                                              | R.LPSGLPVSLLLTYLDNNKISNIPDEYFKR.F | 4 | 4.80 | 0.47 | -3.38 |
| IPI00020986 | Lumican precursor                                                              | R.NNQIDHIDEK.A                    | 1 | 2.67 | 0.25 | -1.58 |
| IPI00020986 | Lumican precursor                                                              | R.NNQIDHIDEK.A                    | 2 | 3.24 | 0.27 | -2.96 |
| IPI00020987 | Prolargin precursor                                                            | K.LENLLLLDLQHNR.L                 | 3 | 2.90 | 0.27 | -1.47 |
| IPI00020987 | Prolargin precursor                                                            | K.LPGLVFLYM*EK.N                  | 2 | 3.30 | 0.31 |       |
| IPI00020987 | Prolargin precursor                                                            | K.NQLEEVPSALPR.N                  | 2 | 3.83 | 0.31 | -2.18 |
| IPI00020987 | Prolargin precursor                                                            | R.LSDGVFKPDTFHGLK.N               | 3 | 2.76 | 0.15 | -2.36 |
| IPI00020987 | Prolargin precursor                                                            | R.LSDGVFKPDTFHGLK.N               | 4 | 2.93 | 0.24 | -3.36 |
| IPI00020987 | Prolargin precursor                                                            | R.VLEKLPGLVFLYM*EK.N              | 3 | 2.52 | 0.16 | -2.90 |
| IPI00020990 | Osteomodulin precursor                                                         | K.IDYGVFAK.L                      | 2 | 2.31 | 0.24 | -3.12 |
| IPI00020990 | Osteomodulin precursor                                                         | K.LKQAFYIPR.N                     | 2 | 3.10 | 0.32 | -2.99 |
| IPI00020990 | Osteomodulin precursor                                                         | K.LM*QLNLCSNR.L                   | 2 | 3.28 | 0.32 | -2.41 |
| IPI00020990 | Osteomodulin precursor                                                         | K.LPNLLQLHLEHNNLEEFPLPK.S         | 2 | 5.17 | 0.56 | -4.17 |
| IPI00020990 | Osteomodulin precursor                                                         | K.LPNLLQLHLEHNNLEEFPLPK.S         | 3 | 6.10 | 0.53 | -4.28 |
| IPI00020990 | Osteomodulin precursor                                                         | K.LPNLLQLHLEHNNLEEFPLPK.S         | 4 | 4.41 | 0.40 | -5.10 |
| IPI00020990 | Osteomodulin precursor                                                         | K.LQDIPYNIFNLPNIVELSVGHNK.L       | 2 | 4.58 | 0.44 | -2.98 |
| IPI00020990 | Osteomodulin precursor                                                         | K.LQDIPYNIFNLPNIVELSVGHNK.L       | 3 | 3.54 | 0.30 | -4.17 |
| IPI00020990 | Osteomodulin precursor                                                         | K.LQDIPYNIFNLPNIVELSVGHNK.L       | 4 | 4.05 | 0.30 | -4.61 |
| IPI00020990 | Osteomodulin precursor                                                         | K.QAFYIPR.N                       | 2 | 1.64 | 0.19 | -1.85 |
| IPI00020990 | Osteomodulin precursor                                                         | K.SQKIDYGVFAK.L                   | 2 | 3.52 | 0.34 | -3.26 |
| IPI00020990 | Osteomodulin precursor                                                         | K.SQKIDYGVFAK.L                   | 3 | 3.52 | 0.35 | -4.00 |
| IPI00020990 | Osteomodulin precursor                                                         | R.LLLGYNEISK.L                    | 1 | 2.92 | 0.21 | -2.72 |
| IPI00020990 | Osteomodulin precursor                                                         | R.LLLGYNEISK.L                    | 2 | 2.16 | 0.15 | -2.13 |
| IPI00020990 | Osteomodulin precursor                                                         | R.STNGQTIQLK.T                    | 2 | 3.28 | 0.29 | 0.26  |
| IPI00020996 | Insulin-like growth factor-binding protein complex acid labile chain precursor | K.AL RDFALQNPSAVPR.F              | 2 | 4.01 | 0.31 | -2.43 |
| IPI00020996 | Insulin-like growth factor-binding protein complex acid labile chain precursor | K.AL RDFALQNPSAVPR.F              | 3 | 2.77 | 0.14 | 0.47  |
| IPI00020996 | Insulin-like growth factor-binding protein complex acid labile chain precursor | K.ANVFVQLPR.L                     | 2 | 3.02 | 0.30 | -1.86 |
| IPI00020996 | Insulin-like growth factor-binding protein complex acid labile chain precursor | K.DLHFLEELQLGHRN.I                | 3 | 4.12 | 0.41 | -1.63 |
| IPI00020996 | Insulin-like growth factor-binding protein complex acid labile chain precursor | K.DLHFLEELQLGHRN.I                | 4 | 3.58 | 0.25 | -2.52 |

|             |                                                                                |                            |   |      |      |       |
|-------------|--------------------------------------------------------------------------------|----------------------------|---|------|------|-------|
| IPI00020996 | Insulin-like growth factor-binding protein complex acid labile chain precursor | K.LEYLLLSR.N               | 1 | 2.07 | 0.15 | -3.89 |
| IPI00020996 | Insulin-like growth factor-binding protein complex acid labile chain precursor | K.LEYLLLSR.N               | 2 | 3.36 | 0.27 | -3.01 |
| IPI00020996 | Insulin-like growth factor-binding protein complex acid labile chain precursor | R.AFWLDVSHNR.L             | 3 | 2.40 | 0.08 | -3.51 |
| IPI00020996 | Insulin-like growth factor-binding protein complex acid labile chain precursor | R.DFALQNPSAVPR.F           | 2 | 3.59 | 0.42 | -3.85 |
| IPI00020996 | Insulin-like growth factor-binding protein complex acid labile chain precursor | R.ELVLAGNR.L               | 2 | 2.05 | 0.08 | -3.16 |
| IPI00020996 | Insulin-like growth factor-binding protein complex acid labile chain precursor | R.LAELPADALGPLQR.A         | 2 | 4.30 | 0.41 | -3.78 |
| IPI00020996 | Insulin-like growth factor-binding protein complex acid labile chain precursor | R.LAELPADALGPLQR.A         | 3 | 4.12 | 0.21 | -2.73 |
| IPI00020996 | Insulin-like growth factor-binding protein complex acid labile chain precursor | R.LAYLQPALFSGLAELR.E       | 2 | 5.31 | 0.31 | -4.49 |
| IPI00020996 | Insulin-like growth factor-binding protein complex acid labile chain precursor | R.LAYLQPALFSGLAELR.E       | 3 | 4.17 | 0.34 | -1.73 |
| IPI00020996 | Insulin-like growth factor-binding protein complex acid labile chain precursor | R.LAYLQPALFSGLAELRELDLSR.N | 3 | 2.74 | 0.29 | -4.72 |
| IPI00020996 | Insulin-like growth factor-binding protein complex acid labile chain precursor | R.LEALPNSLLAPLGR.L         | 2 | 4.46 | 0.43 | -3.96 |
| IPI00020996 | Insulin-like growth factor-binding protein complex acid labile chain precursor | R.LFQGLGKLEYLLLSR.N        | 2 | 4.67 | 0.34 | -4.13 |
| IPI00020996 | Insulin-like growth factor-binding protein complex acid labile chain precursor | R.LFQGLGKLEYLLLSR.N        | 3 | 4.13 | 0.17 | -3.54 |
| IPI00020996 | Insulin-like growth factor-binding protein complex acid labile chain precursor | R.LSHNAIASLRPR.T           | 2 | 2.44 | 0.16 | -4.01 |
| IPI00020996 | Insulin-like growth factor-binding protein complex acid labile chain precursor | R.LWLEGNPWDCGCPK.A         | 2 | 4.49 | 0.40 |       |
| IPI00020996 | Insulin-like growth factor-binding protein complex acid labile chain precursor | R.NLIAAVAPGAFLGLK.A        | 2 | 4.55 | 0.43 | -4.15 |
| IPI00020996 | Insulin-like growth factor-binding protein complex acid labile chain precursor | R.NLIAAVAPGAFLGLK.A        | 3 | 3.15 | 0.30 | -2.38 |
| IPI00020996 | Insulin-like growth factor-binding protein complex acid labile chain precursor | R.NLPEQVFR.G               | 1 | 2.21 | 0.13 | -2.86 |
| IPI00020996 | Insulin-like growth factor-binding protein complex acid labile chain precursor | R.SFEGLGQLEVLTLDHNQLQEVK.A | 2 | 4.76 | 0.50 | -6.85 |
| IPI00020996 | Insulin-like growth factor-binding protein complex acid labile chain precursor | R.SFEGLGQLEVLTLDHNQLQEVK.A | 3 | 3.66 | 0.49 | -3.61 |
| IPI00020996 | Insulin-like growth factor-binding protein complex acid labile chain precursor | R.SLALGTFHAHTPALASGLSNNR.L | 2 | 5.49 | 0.57 | -2.93 |

|             |                                                                                |                                    |   |      |      |       |
|-------------|--------------------------------------------------------------------------------|------------------------------------|---|------|------|-------|
| IPI00020996 | Insulin-like growth factor-binding protein complex acid labile chain precursor | R.SLALGTFAHTPALASLGLSNNR.L         | 3 | 4.78 | 0.46 | -3.70 |
| IPI00020996 | Insulin-like growth factor-binding protein complex acid labile chain precursor | R.TFTPPGLER.L                      | 2 | 2.44 | 0.24 | -2.18 |
| IPI00020996 | Insulin-like growth factor-binding protein complex acid labile chain precursor | R.VAGLLEDTFPGLLGLR.V               | 2 | 5.38 | 0.48 | -4.53 |
| IPI00020996 | Insulin-like growth factor-binding protein complex acid labile chain precursor | R.VAGLLEDTFPGLLGLR.V               | 3 | 4.21 | 0.31 | -3.53 |
| IPI00021000 | Isoform A of Osteopontin precursor                                             | A.IPVKQADSGSSEEK.Q                 | 2 | 4.30 | 0.41 | -3.26 |
| IPI00021000 | Isoform A of Osteopontin precursor                                             | A.IPVKQADSGSSEEK.Q                 | 3 | 3.57 | 0.39 | -1.59 |
| IPI00021000 | Isoform A of Osteopontin precursor                                             | A.NDESNEHSDVIDSQELSK.V             | 2 | 5.40 | 0.44 | -3.67 |
| IPI00021000 | Isoform A of Osteopontin precursor                                             | A.NDESNEHSDVIDSQELSK.V             | 3 | 3.92 | 0.45 | -2.77 |
| IPI00021000 | Isoform A of Osteopontin precursor                                             | A.VSSEETNDFKQETLPSK.S              | 2 | 4.68 | 0.37 | -1.91 |
| IPI00021000 | Isoform A of Osteopontin precursor                                             | H.SDVIDSQELSK.V                    | 2 | 2.94 | 0.30 | -1.60 |
| IPI00021000 | Isoform A of Osteopontin precursor                                             | I.PVAQDLNAPSDWDSR.G                | 2 | 4.56 | 0.45 | -2.57 |
| IPI00021000 | Isoform A of Osteopontin precursor                                             | I.PVKQADSGSSEEK.Q                  | 2 | 3.25 | 0.38 | -1.07 |
| IPI00021000 | Isoform A of Osteopontin precursor                                             | K.AIPVAQDLNAPSD.W                  | 2 | 3.80 | 0.53 | -3.31 |
| IPI00021000 | Isoform A of Osteopontin precursor                                             | K.AIPVAQDLNAPSDWDSR.G              | 2 | 5.21 | 0.53 | -4.53 |
| IPI00021000 | Isoform A of Osteopontin precursor                                             | K.AIPVAQDLNAPSDWDSR.G              | 3 | 4.02 | 0.40 | -3.55 |
| IPI00021000 | Isoform A of Osteopontin precursor                                             | K.ANDESNEHSDVIDSQELSK.V            | 2 | 5.61 | 0.55 | -3.29 |
| IPI00021000 | Isoform A of Osteopontin precursor                                             | K.ANDESNEHSDVIDSQELSK.V            | 3 | 4.89 | 0.34 | -3.60 |
| IPI00021000 | Isoform A of Osteopontin precursor                                             | K.DSYETSQLDDQSAETHSHK.Q            | 2 | 5.84 | 0.65 | -2.86 |
| IPI00021000 | Isoform A of Osteopontin precursor                                             | K.DSYETSQLDDQSAETHSHK.Q            | 3 | 2.98 | 0.25 | -1.85 |
| IPI00021000 | Isoform A of Osteopontin precursor                                             | K.DSYETSQLDDQSAETHSHK.Q            | 4 | 3.22 | 0.27 | -0.90 |
| IPI00021000 | Isoform A of Osteopontin precursor                                             | K.DSYETSQLDDQSAETHSHKQS.R          | 2 | 5.31 | 0.57 | -3.55 |
| IPI00021000 | Isoform A of Osteopontin precursor                                             | K.DSYETSQLDDQSAETHSHKQSR.L         | 3 | 3.78 | 0.44 | -4.42 |
| IPI00021000 | Isoform A of Osteopontin precursor                                             | K.FRISHELDSASSE.V                  | 2 | 3.47 | 0.35 | -1.77 |
| IPI00021000 | Isoform A of Osteopontin precursor                                             | K.FRISHELDSASSEVN.-                | 2 | 4.27 | 0.49 | -4.28 |
| IPI00021000 | Isoform A of Osteopontin precursor                                             | K.FRRPDIQYPDATDEDTSHM*ESEELNGAYK.A | 4 | 4.32 | 0.48 | -2.71 |
| IPI00021000 | Isoform A of Osteopontin precursor                                             | K.QLYNKYPDAVATWLNPDPSQK.Q          | 3 | 3.40 | 0.26 | -3.78 |
| IPI00021000 | Isoform A of Osteopontin precursor                                             | K.QLYNKYPDAVATWLNPDPSQKQN.L        | 3 | 4.15 | 0.31 | -2.77 |
| IPI00021000 | Isoform A of Osteopontin precursor                                             | K.QNLLAPQNAVSSSEETNDFKQETLPSK.S    | 3 | 3.06 | 0.33 | -3.92 |
| IPI00021000 | Isoform A of Osteopontin precursor                                             | K.RKANDESNEHSDVIDSQELSK.V          | 3 | 4.24 | 0.40 | -4.10 |
| IPI00021000 | Isoform A of Osteopontin precursor                                             | K.RKANDESNEHSDVIDSQELSK.V          | 4 | 3.58 | 0.47 | -2.79 |
| IPI00021000 | Isoform A of Osteopontin precursor                                             | K.SKEEDKHLKF.R                     | 2 | 2.90 | 0.27 | -3.89 |
| IPI00021000 | Isoform A of Osteopontin precursor                                             | L.APQNAVSSSEETNDFKQETLPSK.S        | 3 | 4.14 | 0.43 | -1.96 |
| IPI00021000 | Isoform A of Osteopontin precursor                                             | L.DDQSAETHSHK.Q                    | 2 | 3.41 | 0.34 | -3.47 |
| IPI00021000 | Isoform A of Osteopontin precursor                                             | L.LAPQNAVSSSEETNDFKQETLPSK.S       | 2 | 4.72 | 0.54 | -2.89 |
| IPI00021000 | Isoform A of Osteopontin precursor                                             | N.AVSSEETNDFKQETLPSK.S             | 2 | 4.70 | 0.48 | -2.49 |
| IPI00021000 | Isoform A of Osteopontin precursor                                             | N.AVSSEETNDFKQETLPSK.S             | 3 | 3.68 | 0.28 | -1.89 |
| IPI00021000 | Isoform A of Osteopontin precursor                                             | N.DESNEHSDVIDSQELSK.V              | 2 | 5.48 | 0.49 | -3.53 |
| IPI00021000 | Isoform A of Osteopontin precursor                                             | N.EHSDVIDSQELSK.V                  | 2 | 4.20 | 0.39 | -4.84 |

|             |                                                    |                                   |   |      |      |       |
|-------------|----------------------------------------------------|-----------------------------------|---|------|------|-------|
| IPI00021000 | Isoform A of Osteopontin precursor                 | P.QNAVSSEETNDFKQETLPSK.S          | 2 | 4.36 | 0.41 | -1.71 |
| IPI00021000 | Isoform A of Osteopontin precursor                 | P.VAQLNAPSDWDSR.G                 | 2 | 4.52 | 0.49 | -2.52 |
| IPI00021000 | Isoform A of Osteopontin precursor                 | R.EFHSHEFHSHED.M                  | 2 | 2.99 | 0.46 | -4.79 |
| IPI00021000 | Isoform A of Osteopontin precursor                 | R.EFHSHEFHSHEDM*LVVDPK.S          | 2 | 2.30 | 0.41 | -3.82 |
| IPI00021000 | Isoform A of Osteopontin precursor                 | R.EFHSHEFHSHEDM*LVVDPK.S          | 3 | 2.79 | 0.21 | -4.47 |
| IPI00021000 | Isoform A of Osteopontin precursor                 | R.EFHSHEFHSHEDM*LVVDPK.S          | 4 | 2.23 | 0.11 | -2.53 |
| IPI00021000 | Isoform A of Osteopontin precursor                 | R.GDSVVYGLR.S                     | 1 | 1.96 | 0.31 | -2.54 |
| IPI00021000 | Isoform A of Osteopontin precursor                 | R.GDSVVYGLR.S                     | 2 | 3.38 | 0.24 | -3.18 |
| IPI00021000 | Isoform A of Osteopontin precursor                 | R.GKDSYETSQLDDQSAETH.S            | 3 | 3.98 | 0.35 | -1.82 |
| IPI00021000 | Isoform A of Osteopontin precursor                 | R.GKDSYETSQLDDQSAETHS.H           | 2 | 6.10 | 0.61 | -1.71 |
| IPI00021000 | Isoform A of Osteopontin precursor                 | R.GKDSYETSQLDDQSAETHS.H           | 3 | 3.58 | 0.40 | -2.88 |
| IPI00021000 | Isoform A of Osteopontin precursor                 | R.GKDSYETSQLDDQSAETHSH.K          | 3 | 5.23 | 0.50 | -2.21 |
| IPI00021000 | Isoform A of Osteopontin precursor                 | R.GKDSYETSQLDDQSAETHSHK.Q         | 2 | 6.71 | 0.52 | -2.98 |
| IPI00021000 | Isoform A of Osteopontin precursor                 | R.GKDSYETSQLDDQSAETHSHK.Q         | 3 | 6.02 | 0.59 | -4.98 |
| IPI00021000 | Isoform A of Osteopontin precursor                 | R.GKDSYETSQLDDQSAETHSHK.Q         | 4 | 3.89 | 0.25 | -2.95 |
| IPI00021000 | Isoform A of Osteopontin precursor                 | R.GKDSYETSQLDDQSAETHSHK.Q         | 5 | 2.86 | 0.32 | 0.25  |
| IPI00021000 | Isoform A of Osteopontin precursor                 | R.GKDSYETSQLDDQSAETHSHKQ.S        | 2 | 5.03 | 0.53 | -3.50 |
| IPI00021000 | Isoform A of Osteopontin precursor                 | R.GKDSYETSQLDDQSAETHSHKQ.S        | 3 | 5.41 | 0.55 | -3.11 |
| IPI00021000 | Isoform A of Osteopontin precursor                 | R.GKDSYETSQLDDQSAETHSHKQS.R       | 2 | 6.09 | 0.58 | -3.46 |
| IPI00021000 | Isoform A of Osteopontin precursor                 | R.GKDSYETSQLDDQSAETHSHKQS.R       | 3 | 6.61 | 0.56 | -4.74 |
| IPI00021000 | Isoform A of Osteopontin precursor                 | R.ISHELDSASS.E                    | 1 | 2.13 | 0.46 | -2.76 |
| IPI00021000 | Isoform A of Osteopontin precursor                 | R.ISHELDSASSE.V                   | 1 | 2.80 | 0.42 | -4.07 |
| IPI00021000 | Isoform A of Osteopontin precursor                 | R.ISHELDSASSE.V                   | 2 | 3.11 | 0.28 | -2.99 |
| IPI00021000 | Isoform A of Osteopontin precursor                 | R.ISHELDSASSEVN.-                 | 1 | 4.12 | 0.49 | -4.10 |
| IPI00021000 | Isoform A of Osteopontin precursor                 | R.ISHELDSASSEVN.-                 | 2 | 3.69 | 0.44 | -4.48 |
| IPI00021000 | Isoform A of Osteopontin precursor                 | R.KANDESNEHSDVIDSQELSK.V          | 2 | 5.74 | 0.57 | -5.59 |
| IPI00021000 | Isoform A of Osteopontin precursor                 | R.KANDESNEHSDVIDSQELSK.V          | 3 | 6.60 | 0.56 | -4.99 |
| IPI00021000 | Isoform A of Osteopontin precursor                 | R.RPDIQYPDATDEDITSHM*ESEEL.L      | 3 | 4.37 | 0.38 | -3.52 |
| IPI00021000 | Isoform A of Osteopontin precursor                 | R.RPDIQYPDATDEDITSHM*ESEELNGAYK.A | 3 | 6.46 | 0.61 | -2.73 |
| IPI00021000 | Isoform A of Osteopontin precursor                 | R.RPDIQYPDATDEDITSHM*ESEELNGAYK.A | 4 | 5.82 | 0.51 | -2.59 |
| IPI00021000 | Isoform A of Osteopontin precursor                 | S.DVIDSQELSK.V                    | 2 | 3.12 | 0.30 | -2.68 |
| IPI00021000 | Isoform A of Osteopontin precursor                 | T.SQLDDQSAETHSHK.Q                | 2 | 3.02 | 0.30 | -2.21 |
| IPI00021000 | Isoform A of Osteopontin precursor                 | V.AQLNAPSDWDSR.G                  | 2 | 3.84 | 0.43 | -4.37 |
| IPI00021033 | Isoform 1 of Collagen alpha-1(III) chain precursor | K.INTDEIM*TSLK.S                  | 2 | 2.72 | 0.18 | -2.38 |
| IPI00021033 | Isoform 1 of Collagen alpha-1(III) chain precursor | K.LM*GSNEGEFK.A                   | 2 | 1.96 | 0.08 | -2.67 |
| IPI00021033 | Isoform 1 of Collagen alpha-1(III) chain precursor | K.NSIAYM*DQASGNVK.K               | 2 | 4.12 | 0.47 | -3.72 |
| IPI00021033 | Isoform 1 of Collagen alpha-1(III) chain precursor | K.NSIAYM*DQASGNVKK.A              | 2 | 4.02 | 0.42 | -1.83 |
| IPI00021033 | Isoform 1 of Collagen alpha-1(III) chain precursor | K.SGEYWVDPNQGCK.L                 | 2 | 4.07 | 0.48 | -2.33 |
| IPI00021033 | Isoform 1 of Collagen alpha-1(III) chain precursor | K.SVNGQIESLISPDGSR.K              | 2 | 4.60 | 0.50 | -2.52 |
| IPI00021033 | Isoform 1 of Collagen alpha-1(III) chain precursor | K.SVNGQIESLISPDGSR.K              | 3 | 3.19 | 0.14 | -2.77 |
| IPI00021033 | Isoform 1 of Collagen alpha-1(III) chain precursor | K.VFCNM*ETGETCISANPLNVPR.K        | 3 | 2.55 | 0.26 | -2.71 |
| IPI00021033 | Isoform 1 of Collagen alpha-1(III) chain precursor | R.GPVGPSGPPGK.D                   | 2 | 2.17 | 0.22 | -3.11 |

|             |                                                                  |                                     |   |      |      |       |
|-------------|------------------------------------------------------------------|-------------------------------------|---|------|------|-------|
| IPI00021048 | Isoform 1 of Myoferlin                                           | K.VFLPKEELYM*PPLVIK.V               | 2 | 3.16 | 0.10 |       |
| IPI00021091 | Isoform 1 of Leucine-rich glioma-inactivated protein 1 precursor | K.AGFTTIYK.W                        | 2 | 2.32 | 0.14 | -2.83 |
| IPI00021091 | Isoform 1 of Leucine-rich glioma-inactivated protein 1 precursor | R.DTDVEYLEIVR.T                     | 2 | 4.14 | 0.41 | -3.83 |
| IPI00021119 | Carbohydrate sulfotransferase 1                                  | K.IAASEEELKNPSVSLVEER.D             | 3 | 4.56 | 0.44 | -1.57 |
| IPI00021119 | Carbohydrate sulfotransferase 1                                  | K.TEEIYGFLGIPLDSHVAR.W              | 3 | 3.54 | 0.40 | -1.91 |
| IPI00021199 | Stathmin-3                                                       | K.DTSLEELQK.R                       | 2 | 2.63 | 0.13 | -2.47 |
| IPI00021199 | Stathmin-3                                                       | K.RLEAAEER.R                        | 2 | 2.60 | 0.09 | -0.31 |
| IPI00021263 | 14-3-3 protein zeta/delta                                        | K.IETELRDICNDVLSLLEK.F              | 2 | 3.92 | 0.28 | -3.22 |
| IPI00021263 | 14-3-3 protein zeta/delta                                        | K.IETELRDICNDVLSLLEK.F              | 3 | 5.16 | 0.41 | -2.85 |
| IPI00021263 | 14-3-3 protein zeta/delta                                        | K.M*KGDYYR.Y                        | 2 | 2.25 | 0.17 | -2.86 |
| IPI00021263 | 14-3-3 protein zeta/delta                                        | K.SVTEQGAELSNEER.N                  | 2 | 4.97 | 0.37 | -3.16 |
| IPI00021263 | 14-3-3 protein zeta/delta                                        | K.TAFDEAIAELDTLSEESYK.D             | 2 | 4.84 | 0.39 | -2.32 |
| IPI00021263 | 14-3-3 protein zeta/delta                                        | K.TAFDEAIAELDTLSEESYK.D             | 3 | 4.35 | 0.43 | -4.28 |
| IPI00021263 | 14-3-3 protein zeta/delta                                        | K.TAFDEAIAELDTLSEESYKDSTLIM*QLLR.D  | 3 | 5.68 | 0.52 | -4.58 |
| IPI00021263 | 14-3-3 protein zeta/delta                                        | K.TAFDEAIAELDTLSEESYKDSTLIM*QLLR.D  | 4 | 4.17 | 0.31 | -4.23 |
| IPI00021263 | 14-3-3 protein zeta/delta                                        | K.TAFDEAIAELDTLSEESYKDSTLIMQLLR.D   | 3 | 7.46 | 0.62 | -4.46 |
| IPI00021263 | 14-3-3 protein zeta/delta                                        | K.TAFDEAIAELDTLSEESYKDSTLIMQLLR.D   | 4 | 4.60 | 0.24 | -3.47 |
| IPI00021263 | 14-3-3 protein zeta/delta                                        | R.DICNDVLSLLEK.F                    | 2 | 4.08 | 0.24 | -3.52 |
| IPI00021263 | 14-3-3 protein zeta/delta                                        | R.DNLTWTSQTQGDAAEAGEGGEN.-          | 2 | 5.93 | 0.56 | -5.64 |
| IPI00021263 | 14-3-3 protein zeta/delta                                        | R.LGLALNFSVFYIEILNSPEK.A            | 2 | 4.16 | 0.55 | -2.27 |
| IPI00021263 | 14-3-3 protein zeta/delta                                        | R.NLLSVAYK.N                        | 1 | 1.68 | 0.08 | -2.46 |
| IPI00021263 | 14-3-3 protein zeta/delta                                        | R.NLLSVAYK.N                        | 2 | 2.28 | 0.09 | -1.47 |
| IPI00021263 | 14-3-3 protein zeta/delta                                        | R.VVSSIEQK.T                        | 1 | 2.24 | 0.05 | -2.39 |
| IPI00021263 | 14-3-3 protein zeta/delta                                        | R.VVSSIEQK.T                        | 2 | 3.14 | 0.16 | -2.69 |
| IPI00021263 | 14-3-3 protein zeta/delta                                        | R.YLAEVAAGDDKK.G                    | 2 | 3.81 | 0.31 | -2.82 |
| IPI00021263 | 14-3-3 protein zeta/delta                                        | R.YLAEVAAGDDKK.G                    | 3 | 2.36 | 0.16 | -3.21 |
| IPI00021263 | 14-3-3 protein zeta/delta                                        | R.YLAEVAAGDDKGIVDQSQQAYQEAFFEISKK.E | 4 | 5.34 | 0.45 | -2.45 |
| IPI00021274 | Ephrin type-A receptor 8 precursor                               | R.DFLSEASIMGQFDHPNIIRLEGVVTRGR.L    | 3 | 4.32 | 0.07 |       |
| IPI00021275 | Isoform 1 of Ephrin type-B receptor 2 precursor                  | K.VDTIAADESFSQVDLGGGR.V             | 2 | 5.78 | 0.55 | -4.14 |
| IPI00021275 | Isoform 1 of Ephrin type-B receptor 2 precursor                  | K.VDTIAADESFSQVDLGGGR.V             | 3 | 4.64 | 0.41 | -3.09 |
| IPI00021275 | Isoform 1 of Ephrin type-B receptor 2 precursor                  | R.GSCIANAAEEDVPIKLYCNGDGEWLVIPIGR.C | 3 | 3.90 | 0.42 | -4.89 |
| IPI00021275 | Isoform 1 of Ephrin type-B receptor 2 precursor                  | R.QLGLTEPR.I                        | 2 | 1.50 | 0.09 | -0.94 |
| IPI00021275 | Isoform 1 of Ephrin type-B receptor 2 precursor                  | R.TTSEGATNCVCR.N                    | 2 | 3.23 | 0.36 | -2.52 |
| IPI00021275 | Isoform 1 of Ephrin type-B receptor 2 precursor                  | R.TYQVCNVFESSQNNWLR.T               | 2 | 4.79 | 0.48 | -2.14 |
| IPI00021304 | Keratin, type II cytoskeletal 2 epidermal                        | K.AQYEEIAQR.S                       | 2 | 2.37 | 0.11 | -2.21 |
| IPI00021304 | Keratin, type II cytoskeletal 2 epidermal                        | K.DVDNAYM*IK.V                      | 2 | 2.85 | 0.07 | -2.69 |
| IPI00021304 | Keratin, type II cytoskeletal 2 epidermal                        | K.GGSISGGGYGSGGGK.H                 | 2 | 4.02 | 0.43 | -2.62 |
| IPI00021304 | Keratin, type II cytoskeletal 2 epidermal                        | K.HSSGGGSRGSSSSGGGYGSGGGSSSVK.G     | 3 | 4.66 | 0.26 |       |
| IPI00021304 | Keratin, type II cytoskeletal 2 epidermal                        | K.KYEDEINKR.T                       | 2 | 3.00 | 0.17 | -1.46 |
| IPI00021304 | Keratin, type II cytoskeletal 2 epidermal                        | K.VDLLNQEIEFLK.V                    | 2 | 4.27 | 0.13 |       |

|             |                                                               |                                    |   |      |      |       |
|-------------|---------------------------------------------------------------|------------------------------------|---|------|------|-------|
| IPI00021304 | Keratin, type II cytoskeletal 2 epidermal                     | R.FLEQQNQVLQTK.W                   | 2 | 4.27 | 0.32 | -3.17 |
| IPI00021304 | Keratin, type II cytoskeletal 2 epidermal                     | R.GFSSGSAVVSGGSR.R                 | 2 | 2.72 | 0.31 | -1.48 |
| IPI00021304 | Keratin, type II cytoskeletal 2 epidermal                     | R.GSSSGGGYSSGSSSYGSGGR.Q           | 2 | 4.77 | 0.57 | -3.29 |
| IPI00021304 | Keratin, type II cytoskeletal 2 epidermal                     | R.M*SGDLSSNVTVSVTSSTISSNVASK.A     | 2 | 4.88 | 0.41 |       |
| IPI00021304 | Keratin, type II cytoskeletal 2 epidermal                     | R.M*SGDLSSNVTVSVTSSTISSNVASK.A     | 3 | 4.63 | 0.40 |       |
| IPI00021304 | Keratin, type II cytoskeletal 2 epidermal                     | R.NLDLDSIIAEVKAQYEEIAQR.S          | 2 | 3.36 | 0.22 |       |
| IPI00021304 | Keratin, type II cytoskeletal 2 epidermal                     | R.NLDLDSIIAEVKAQYEEIAQR.S          | 3 | 5.87 | 0.48 |       |
| IPI00021304 | Keratin, type II cytoskeletal 2 epidermal                     | R.QSGSRGGSGGGGSISGGGYGSGGGSGGR.Y   | 2 | 2.66 | 0.38 |       |
| IPI00021304 | Keratin, type II cytoskeletal 2 epidermal                     | R.QSGSRGGSGGGGSISGGGYGSGGGSGGR.Y   | 3 | 4.26 | 0.12 |       |
| IPI00021304 | Keratin, type II cytoskeletal 2 epidermal                     | R.SKEEAEALYHSK.Y                   | 2 | 4.17 | 0.42 | -2.86 |
| IPI00021304 | Keratin, type II cytoskeletal 2 epidermal                     | R.SLVGLGGTK.S                      | 2 | 2.34 | 0.20 | -1.58 |
| IPI00021304 | Keratin, type II cytoskeletal 2 epidermal                     | R.YGSGGGSKGGSISGGGYGSGGGK.H        | 3 | 4.99 | 0.27 |       |
| IPI00021304 | Keratin, type II cytoskeletal 2 epidermal                     | R.YLDGLTAER.T                      | 2 | 2.31 | 0.13 | -1.87 |
| IPI00021304 | Keratin, type II cytoskeletal 2 epidermal                     | T.SSTISSNVASK.A                    | 1 | 2.05 | 0.24 | -1.86 |
| IPI00021304 | Keratin, type II cytoskeletal 2 epidermal                     | T.SSTISSNVASK.A                    | 2 | 3.29 | 0.32 | -0.82 |
| IPI00021327 | Isoform 1 of Growth factor receptor-bound protein 2           | K.YFLWVVK.F                        | 2 | 2.58 | 0.12 | -1.48 |
| IPI00021347 | Ubiquitin-conjugating enzyme E2 L3                            | K.NAEFTKK.Y                        | 2 | 2.42 | 0.18 | -2.84 |
| IPI00021347 | Ubiquitin-conjugating enzyme E2 L3                            | K.TDQVIQSLIALVNDPQPEHPLR.A         | 3 | 3.83 | 0.45 | -0.72 |
| IPI00021347 | Ubiquitin-conjugating enzyme E2 L3                            | R.IEINFPAEYPPKPPKITFK.T            | 4 | 2.57 | 0.19 | -3.10 |
| IPI00021363 | Histone demethylase JARID1A                                   | K.AAAAKVELVK.E                     | 1 | 2.07 | 0.10 |       |
| IPI00021364 | Properdin precursor                                           | S.DPVLCFYQYEESSGK.C                | 2 | 4.77 | 0.48 | -3.91 |
| IPI00021447 | Alpha-amylase 2B precursor                                    | K.IAEYM*NHLIDIGVAGFR.L             | 3 | 2.98 | 0.26 | -1.59 |
| IPI00021447 | Alpha-amylase 2B precursor                                    | K.IYVSDDGK.A                       | 2 | 1.94 | 0.07 | -1.69 |
| IPI00021447 | Alpha-amylase 2B precursor                                    | K.TGSGDIENYNDATQVR.D               | 2 | 4.75 | 0.47 | -2.44 |
| IPI00021447 | Alpha-amylase 2B precursor                                    | R.LVGLLDLALDKDYVR.S                | 2 | 2.97 | 0.46 | -3.28 |
| IPI00021447 | Alpha-amylase 2B precursor                                    | R.YQPVSYK.L                        | 1 | 1.65 | 0.16 | -6.51 |
| IPI00021476 | Eukaryotic translation initiation factor 4E-binding protein 3 | G.GRDQLPDCYSTTPGGTLYATPPGGTRIYDR.K | 3 | 3.74 | 0.19 | 2.07  |
| IPI00021485 | Leucine-rich repeat neuronal protein 1 precursor              | K.FLDLNKNPIHK.I                    | 2 | 3.06 | 0.31 | -2.65 |
| IPI00021485 | Leucine-rich repeat neuronal protein 1 precursor              | K.IDNPHITYTAR.V                    | 3 | 2.67 | 0.25 | -2.20 |
| IPI00021485 | Leucine-rich repeat neuronal protein 1 precursor              | K.TVESLPNLR.E                      | 2 | 2.44 | 0.18 | 0.12  |
| IPI00021485 | Leucine-rich repeat neuronal protein 1 precursor              | K.VNSNVM*TSNLK.W                   | 2 | 3.53 | 0.44 | -2.13 |
| IPI00021485 | Leucine-rich repeat neuronal protein 1 precursor              | R.EATTVDCNDLR.L                    | 2 | 3.14 | 0.30 | -3.74 |
| IPI00021485 | Leucine-rich repeat neuronal protein 1 precursor              | R.LKELGINNM*GELVSVDR.Y             | 3 | 3.28 | 0.27 | -0.32 |
| IPI00021485 | Leucine-rich repeat neuronal protein 1 precursor              | R.SVPALES LM*LNNNALNAIYQK.T        | 3 | 4.46 | 0.39 | -4.42 |
| IPI00021485 | Leucine-rich repeat neuronal protein 1 precursor              | R.YALDNLPELTKEATNPNK.L             | 3 | 4.22 | 0.46 | -3.98 |
| IPI00021485 | Leucine-rich repeat neuronal protein 1 precursor              | R.YTCVAQNQQADTR.V                  | 2 | 4.08 | 0.30 | -3.08 |
| IPI00021552 | UDP-GalNAc:beta-1,3-N-acetylgalactosaminyltransferase 1       | K.FFTGYPLIDNYSYR.G                 | 2 | 4.77 | 0.52 | -4.58 |
| IPI00021552 | UDP-GalNAc:beta-1,3-N-acetylgalactosaminyltransferase 1       | K.M*LALSLEDEHLLYGDIIIR.Q           | 2 | 5.43 | 0.35 | -2.61 |



|             |                                                                       |                                |   |      |      |       |
|-------------|-----------------------------------------------------------------------|--------------------------------|---|------|------|-------|
| IPI00021552 | UDP-GalNAc:beta-1,3-N-acetylgalactosaminyltransferase 1               | K.M*LALSLEDEHLLYGDII.R.Q       | 3 | 4.03 | 0.37 | -3.33 |
| IPI00021552 | UDP-GalNAc:beta-1,3-N-acetylgalactosaminyltransferase 1               | K.THISYQEYPFK.V                | 2 | 3.24 | 0.45 | -1.48 |
| IPI00021552 | UDP-GalNAc:beta-1,3-N-acetylgalactosaminyltransferase 1               | K.VNIHIPEDTNLFFLYR.I           | 2 | 2.93 | 0.13 | -3.23 |
| IPI00021552 | UDP-GalNAc:beta-1,3-N-acetylgalactosaminyltransferase 1               | K.VNIHIPEDTNLFFLYR.I           | 3 | 3.58 | 0.33 | -1.87 |
| IPI00021552 | UDP-GalNAc:beta-1,3-N-acetylgalactosaminyltransferase 1               | R.VIAAHGFSSK.E                 | 1 | 2.22 | 0.22 | -3.53 |
| IPI00021552 | UDP-GalNAc:beta-1,3-N-acetylgalactosaminyltransferase 1               | R.VIAAHGFSSK.E                 | 2 | 2.66 | 0.26 | -0.32 |
| IPI00021552 | UDP-GalNAc:beta-1,3-N-acetylgalactosaminyltransferase 1               | R.VNWM*YFYEYEPIYR.Q            | 2 | 4.62 | 0.52 | -6.23 |
| IPI00021552 | UDP-GalNAc:beta-1,3-N-acetylgalactosaminyltransferase 1               | R.VNWM*YFYEYEPIYR.Q            | 3 | 3.89 | 0.44 | -4.23 |
| IPI00021552 | UDP-GalNAc:beta-1,3-N-acetylgalactosaminyltransferase 1               | R.WVTEFCPNAK.Y                 | 2 | 3.00 | 0.36 | -2.55 |
| IPI00021552 | UDP-GalNAc:beta-1,3-N-acetylgalactosaminyltransferase 1               | Y.LSLPHYNVIER.V                | 3 | 3.54 | 0.33 | -3.69 |
| IPI00021594 | Isoform 1 of Glycosylphosphatidylinositol anchor attachment 1 protein | R.TYMSENAM*GSTM*VEEQFAGGDRAR.A | 3 | 2.86 | 0.08 | 1.79  |
| IPI00021634 | Kinesin light chain 2                                                 | R.SSRDMAGGAGPRSESDLEDVGP.TAE.W | 2 | 3.22 | 0.21 | -5.82 |
| IPI00021695 | Isoform D of Plasma membrane calcium-transporting ATPase 1            | K.SM*STVLKNSDGSYR.I            | 2 | 2.68 | 0.17 |       |
| IPI00021695 | Isoform D of Plasma membrane calcium-transporting ATPase 1            | R.M*VTGDNINTAR.A               | 2 | 3.18 | 0.30 | 0.22  |
| IPI00021727 | C4b-binding protein alpha chain precursor                             | R.KPELVNGR.L                   | 2 | 2.73 | 0.06 |       |
| IPI00021727 | C4b-binding protein alpha chain precursor                             | R.WTPYQGCEALCCPEPK.L           | 2 | 2.81 | 0.06 |       |
| IPI00021733 | Bifunctional heparan sulfate N-deacetylase/N-sulfotransferase 4       | Q.VTSTEEYPHLKPAR.Y             | 2 | 3.63 | 0.33 | -4.30 |
| IPI00021753 | Kinesin-like protein KIF13B                                           | K.DRLEESEKLIQEMTVTWEKLR.K      | 3 | 3.02 | 0.08 | 2.59  |
| IPI00021766 | Isoform 1 of Reticulon-4                                              | K.SEIANAPDGAGSLPCTELPHDLSL.K.N | 4 | 2.90 | 0.14 | -4.72 |
| IPI00021770 | Isoform 1 of 3-hydroxy-3-methylglutaryl-coenzyme A reductase          | K.M*IMSLGLVLVHAHSR.W           | 2 | 1.77 | 0.08 | -0.14 |
| IPI00021794 | Lysosomal protective protein precursor                                | K.DTVVVQDLGNIFTR.L             | 2 | 4.17 | 0.42 | -3.43 |
| IPI00021794 | Lysosomal protective protein precursor                                | K.GAGHM*VPTDKPLAAFM*FSR.F      | 3 | 4.67 | 0.47 | -1.59 |
| IPI00021794 | Lysosomal protective protein precursor                                | K.YGDSGEQIAGFVK.E              | 2 | 4.68 | 0.47 | -3.40 |
| IPI00021794 | Lysosomal protective protein precursor                                | R.SM*NSQYLK.L                  | 2 | 2.28 | 0.10 | -1.67 |
| IPI00021794 | Lysosomal protective protein precursor                                | R.YEKDTVVVQDLGNIFTR.L          | 3 | 4.83 | 0.33 | -3.11 |
| IPI00021812 | Neuroblast differentiation-associated protein AHNAK                   | K.ADVDISGPK.I                  | 2 | 2.39 | 0.13 | -3.31 |

|             |                                                                  |                                       |   |      |      |       |
|-------------|------------------------------------------------------------------|---------------------------------------|---|------|------|-------|
| IPI00021817 | Vitamin K-dependent protein C precursor                          | K.STTDNDIALHHAQPATLSQTIVPICLPDGLAER.E | 3 | 4.27 | 0.40 | -3.13 |
| IPI00021817 | Vitamin K-dependent protein C precursor                          | K.STTDNDIALHHAQPATLSQTIVPICLPDGLAER.E | 4 | 4.19 | 0.37 | -2.52 |
| IPI00021817 | Vitamin K-dependent protein C precursor                          | R.DTEDQEDQVDPR.L                      | 2 | 3.51 | 0.42 | -1.84 |
| IPI00021817 | Vitamin K-dependent protein C precursor                          | R.LGEYDLR.R                           | 2 | 2.46 | 0.25 | -3.19 |
| IPI00021817 | Vitamin K-dependent protein C precursor                          | R.TFVLNFIK.I                          | 2 | 2.99 | 0.25 | -3.39 |
| IPI00021831 | cAMP-dependent protein kinase type I-alpha regulatory subunit    | K.IVVQGEPEGDEFFIILEGSAAVLQR.R         | 3 | 3.78 | 0.23 | -2.86 |
| IPI00021833 | Isoform Long of Platelet-derived growth factor A chain precursor | E.IDSVGSEDSLDTSLR.A                   | 2 | 4.31 | 0.49 | -4.37 |
| IPI00021833 | Isoform Long of Platelet-derived growth factor A chain precursor | I.DSVGSEDSLDTSLR.A                    | 2 | 3.67 | 0.42 | 1.72  |
| IPI00021833 | Isoform Long of Platelet-derived growth factor A chain precursor | L.EIDSVGSEDSLDTSLR.A                  | 2 | 4.25 | 0.53 | -1.88 |
| IPI00021833 | Isoform Long of Platelet-derived growth factor A chain precursor | R.LLEIDSVGSEDSLDTSLR.A                | 2 | 6.32 | 0.62 | -5.05 |
| IPI00021833 | Isoform Long of Platelet-derived growth factor A chain precursor | R.LLEIDSVGSEDSLDTSLR.A                | 3 | 4.90 | 0.47 | -4.96 |
| IPI00021834 | Isoform Alpha of Tissue factor pathway inhibitor precursor       | K.TTLQKEKPDFCFLEEDPGICR.G             | 3 | 3.82 | 0.22 | -2.19 |
| IPI00021834 | Isoform Alpha of Tissue factor pathway inhibitor precursor       | R.FFFNIFTR.Q                          | 2 | 2.80 | 0.22 | 1.16  |
| IPI00021841 | Apolipoprotein A-I precursor                                     | K.AKPALEDLR.Q                         | 1 | 2.31 | 0.14 |       |
| IPI00021841 | Apolipoprotein A-I precursor                                     | K.AKPALEDLR.Q                         | 2 | 2.68 | 0.29 |       |
| IPI00021841 | Apolipoprotein A-I precursor                                     | K.AKPALEDLRQGLLPVLESFK.V              | 2 | 4.62 | 0.35 |       |
| IPI00021841 | Apolipoprotein A-I precursor                                     | K.AKPALEDLRQGLLPVLESFK.V              | 3 | 4.00 | 0.34 |       |
| IPI00021841 | Apolipoprotein A-I precursor                                     | K.AKPALEDLRQGLLPVLESFKVSFLSALEEYTK.K  | 3 | 6.06 | 0.45 |       |
| IPI00021841 | Apolipoprotein A-I precursor                                     | K.AKVQPYLDDFQK.K                      | 2 | 2.89 | 0.19 |       |
| IPI00021841 | Apolipoprotein A-I precursor                                     | K.AKVQPYLDDFQKK.W                     | 2 | 3.74 | 0.28 |       |
| IPI00021841 | Apolipoprotein A-I precursor                                     | K.AKVQPYLDDFQKK.W                     | 3 | 3.66 | 0.27 |       |
| IPI00021841 | Apolipoprotein A-I precursor                                     | K.ATEHLSTLSEK.A                       | 1 | 3.22 | 0.33 |       |
| IPI00021841 | Apolipoprotein A-I precursor                                     | K.ATEHLSTLSEK.A                       | 2 | 2.41 | 0.37 | -3.11 |
| IPI00021841 | Apolipoprotein A-I precursor                                     | K.ATEHLSTLSEK.A                       | 3 | 2.83 | 0.25 | -4.22 |
| IPI00021841 | Apolipoprotein A-I precursor                                     | K.ATEHLSTLSEKAKPALEDLR.Q              | 3 | 3.51 | 0.18 |       |
| IPI00021841 | Apolipoprotein A-I precursor                                     | K.DLATVYVDVLK.D                       | 1 | 2.54 | 0.27 |       |
| IPI00021841 | Apolipoprotein A-I precursor                                     | K.DLATVYVDVLK.D                       | 2 | 3.38 | 0.35 | -2.60 |
| IPI00021841 | Apolipoprotein A-I precursor                                     | K.DLATVYVDVLKDSGR.D                   | 2 | 4.53 | 0.49 |       |
| IPI00021841 | Apolipoprotein A-I precursor                                     | K.DLATVYVDVLKDSGR.D                   | 3 | 3.68 | 0.37 |       |
| IPI00021841 | Apolipoprotein A-I precursor                                     | K.DLATVYVDVLKDSGRDYVSQFEGSALGK.Q      | 2 | 4.35 | 0.35 |       |
| IPI00021841 | Apolipoprotein A-I precursor                                     | K.DLATVYVDVLKDSGRDYVSQFEGSALGK.Q      | 3 | 5.36 | 0.36 |       |
| IPI00021841 | Apolipoprotein A-I precursor                                     | K.DSGRDYVSQFEGSALGK.Q                 | 1 | 4.58 | 0.32 |       |
| IPI00021841 | Apolipoprotein A-I precursor                                     | K.DSGRDYVSQFEGSALGK.Q                 | 2 | 2.84 | 0.18 | -5.98 |
| IPI00021841 | Apolipoprotein A-I precursor                                     | K.DSGRDYVSQFEGSALGK.Q                 | 3 | 5.32 | 0.31 |       |

|             |                              |                                       |   |      |      |       |
|-------------|------------------------------|---------------------------------------|---|------|------|-------|
| IPI00021841 | Apolipoprotein A-I precursor | K.ETEGLRQEM*SKDLEEVK.A                | 2 | 3.60 | 0.07 |       |
| IPI00021841 | Apolipoprotein A-I precursor | K.ETEGLRQEM*SKDLEEVK.A                | 3 | 3.70 | 0.14 |       |
| IPI00021841 | Apolipoprotein A-I precursor | K.ETEGLRQEM*SKDLEEVKAK.V              | 3 | 4.76 | 0.29 |       |
| IPI00021841 | Apolipoprotein A-I precursor | K.ETEGLRQEMSKDLEEVKAK.V               | 3 | 4.36 | 0.19 |       |
| IPI00021841 | Apolipoprotein A-I precursor | K.KWQEEM*ELYR.Q                       | 2 | 2.78 | 0.28 |       |
| IPI00021841 | Apolipoprotein A-I precursor | K.KWQEEM*ELYR.Q                       | 3 | 4.18 | 0.14 |       |
| IPI00021841 | Apolipoprotein A-I precursor | K.KWQEEMELYR.Q                        | 2 | 2.18 | 0.18 |       |
| IPI00021841 | Apolipoprotein A-I precursor | K.LLDNWDSVTSTFSK.L                    | 1 | 2.70 | 0.26 |       |
| IPI00021841 | Apolipoprotein A-I precursor | K.LLDNWDSVTSTFSK.L                    | 2 | 4.61 | 0.43 |       |
| IPI00021841 | Apolipoprotein A-I precursor | K.LREQLGPVTQEFWDNLEK.E                | 2 | 6.01 | 0.49 |       |
| IPI00021841 | Apolipoprotein A-I precursor | K.LREQLGPVTQEFWDNLEK.E                | 3 | 6.33 | 0.41 |       |
| IPI00021841 | Apolipoprotein A-I precursor | K.LREQLGPVTQEFWDNLEKETEGLR.Q          | 2 | 4.10 | 0.32 |       |
| IPI00021841 | Apolipoprotein A-I precursor | K.LREQLGPVTQEFWDNLEKETEGLR.Q          | 3 | 6.84 | 0.42 |       |
| IPI00021841 | Apolipoprotein A-I precursor | K.LREQLGPVTQEFWDNLEKETEGLRQEM*SK.D    | 3 | 5.37 | 0.43 |       |
| IPI00021841 | Apolipoprotein A-I precursor | K.LREQLGPVTQEFWDNLEKETEGLRQEMSK.D     | 3 | 5.31 | 0.34 |       |
| IPI00021841 | Apolipoprotein A-I precursor | K.LSPLGEEM*R.D                        | 2 | 2.15 | 0.20 |       |
| IPI00021841 | Apolipoprotein A-I precursor | K.VEPLRAELQEGAR.Q                     | 1 | 2.16 | 0.10 |       |
| IPI00021841 | Apolipoprotein A-I precursor | K.VEPLRAELQEGAR.Q                     | 2 | 3.11 | 0.17 |       |
| IPI00021841 | Apolipoprotein A-I precursor | K.VQPYLDDFQKK.W                       | 1 | 2.96 | 0.09 |       |
| IPI00021841 | Apolipoprotein A-I precursor | K.VQPYLDDFQKK.W                       | 2 | 2.72 | 0.23 |       |
| IPI00021841 | Apolipoprotein A-I precursor | K.VSFLSALEEYTK.K                      | 1 | 2.99 | 0.32 |       |
| IPI00021841 | Apolipoprotein A-I precursor | K.VSFLSALEEYTK.K                      | 2 | 4.82 | 0.42 | -4.02 |
| IPI00021841 | Apolipoprotein A-I precursor | K.VSFLSALEEYTK.K                      | 3 | 3.35 | 0.22 |       |
| IPI00021841 | Apolipoprotein A-I precursor | K.VSFLSALEEYTKK.L                     | 1 | 3.00 | 0.28 |       |
| IPI00021841 | Apolipoprotein A-I precursor | K.VSFLSALEEYTKK.L                     | 2 | 4.17 | 0.41 |       |
| IPI00021841 | Apolipoprotein A-I precursor | K.VSFLSALEEYTKK.L                     | 3 | 1.94 | 0.20 | -2.46 |
| IPI00021841 | Apolipoprotein A-I precursor | K.WQEEM*ELYR.Q                        | 2 | 3.38 | 0.29 |       |
| IPI00021841 | Apolipoprotein A-I precursor | K.WQEEMELYR.Q                         | 2 | 3.32 | 0.17 |       |
| IPI00021841 | Apolipoprotein A-I precursor | R.AHVDALR.T                           | 1 | 2.18 | 0.12 |       |
| IPI00021841 | Apolipoprotein A-I precursor | R.DYVSQFEGSALGK.Q                     | 1 | 2.85 | 0.21 |       |
| IPI00021841 | Apolipoprotein A-I precursor | R.DYVSQFEGSALGK.Q                     | 2 | 4.37 | 0.46 | -3.35 |
| IPI00021841 | Apolipoprotein A-I precursor | R.EQLGPVTQEFWDNLEK.E                  | 2 | 4.35 | 0.50 |       |
| IPI00021841 | Apolipoprotein A-I precursor | R.EQLGPVTQEFWDNLEKETEGLR.Q            | 2 | 3.31 | 0.40 |       |
| IPI00021841 | Apolipoprotein A-I precursor | R.EQLGPVTQEFWDNLEKETEGLR.Q            | 3 | 2.91 | 0.34 |       |
| IPI00021841 | Apolipoprotein A-I precursor | R.EQLGPVTQEFWDNLEKETEGLRQEM*SK.D      | 3 | 3.59 | 0.32 |       |
| IPI00021841 | Apolipoprotein A-I precursor | R.EQLGPVTQEFWDNLEKETEGLRQEMSK.D       | 3 | 3.61 | 0.25 |       |
| IPI00021841 | Apolipoprotein A-I precursor | R.EQLGPVTQEFWDNLEKETEGLRQEMSKDLEEVK.A | 3 | 3.36 | 0.07 |       |
| IPI00021841 | Apolipoprotein A-I precursor | R.LAARLEALKENGGAR.L                   | 2 | 3.91 | 0.35 |       |
| IPI00021841 | Apolipoprotein A-I precursor | R.LAARLEALKENGGAR.L                   | 3 | 3.99 | 0.26 |       |
| IPI00021841 | Apolipoprotein A-I precursor | R.LAEYHAK.A                           | 2 | 1.85 | 0.08 | -1.95 |
| IPI00021841 | Apolipoprotein A-I precursor | R.LEALKENGGAR.L                       | 1 | 2.44 | 0.11 |       |
| IPI00021841 | Apolipoprotein A-I precursor | R.LEALKENGGAR.L                       | 2 | 2.81 | 0.19 | -1.86 |

|             |                              |                                    |   |      |      |       |
|-------------|------------------------------|------------------------------------|---|------|------|-------|
| IPI00021841 | Apolipoprotein A-I precursor | R.QEM*SKDLEEVKAK.V                 | 2 | 2.67 | 0.26 |       |
| IPI00021841 | Apolipoprotein A-I precursor | R.QEMSKDLEEVKAK.V                  | 2 | 4.07 | 0.29 |       |
| IPI00021841 | Apolipoprotein A-I precursor | R.QGLLPVLESFK.V                    | 1 | 2.93 | 0.28 |       |
| IPI00021841 | Apolipoprotein A-I precursor | R.QGLLPVLESFK.V                    | 2 | 2.71 | 0.26 | -4.15 |
| IPI00021841 | Apolipoprotein A-I precursor | R.QGLLPVLESFKVSFLSALEEYTK.K        | 3 | 3.76 | 0.15 |       |
| IPI00021841 | Apolipoprotein A-I precursor | R.QKVEPLRAELQEGAR.Q                | 2 | 2.14 | 0.09 | -3.74 |
| IPI00021841 | Apolipoprotein A-I precursor | R.THLAPYSDEL.R.Q                   | 1 | 2.91 | 0.41 |       |
| IPI00021841 | Apolipoprotein A-I precursor | R.THLAPYSDEL.R.Q                   | 2 | 2.35 | 0.28 | -3.15 |
| IPI00021841 | Apolipoprotein A-I precursor | R.THLAPYSDEL.R.Q                   | 3 | 3.35 | 0.26 |       |
| IPI00021841 | Apolipoprotein A-I precursor | R.THLAPYSDEL.RQR.L                 | 2 | 3.76 | 0.31 |       |
| IPI00021841 | Apolipoprotein A-I precursor | R.THLAPYSDEL.RQR.L                 | 3 | 3.05 | 0.32 |       |
| IPI00021841 | Apolipoprotein A-I precursor | R.VKDLATVYVDVLK.D                  | 1 | 3.40 | 0.37 |       |
| IPI00021841 | Apolipoprotein A-I precursor | R.VKDLATVYVDVLK.D                  | 2 | 4.55 | 0.35 |       |
| IPI00021841 | Apolipoprotein A-I precursor | R.VKDLATVYVDVLK.D                  | 3 | 4.19 | 0.28 |       |
| IPI00021841 | Apolipoprotein A-I precursor | R.VKDLATVYVDVLKDSGR.D              | 2 | 5.82 | 0.54 |       |
| IPI00021841 | Apolipoprotein A-I precursor | R.VKDLATVYVDVLKDSGR.D              | 3 | 5.73 | 0.49 |       |
| IPI00021841 | Apolipoprotein A-I precursor | R.VKDLATVYVDVLKDSGR.D              | 4 | 2.98 | 0.21 | -2.97 |
| IPI00021841 | Apolipoprotein A-I precursor | R.VKDLATVYVDVLKDSGRDYVSQFEGSALGK.Q | 2 | 5.25 | 0.55 |       |
| IPI00021841 | Apolipoprotein A-I precursor | R.VKDLATVYVDVLKDSGRDYVSQFEGSALGK.Q | 3 | 6.49 | 0.46 |       |
| IPI00021842 | Apolipoprotein E precursor   | A.KLEEQAAQIR.L                     | 2 | 3.87 | 0.08 | -1.82 |
| IPI00021842 | Apolipoprotein E precursor   | A.KVEQAVETEPEPELR.Q                | 1 | 3.62 | 0.33 |       |
| IPI00021842 | Apolipoprotein E precursor   | A.KVEQAVETEPEPELR.Q                | 2 | 5.69 | 0.50 | -3.34 |
| IPI00021842 | Apolipoprotein E precursor   | A.KVEQAVETEPEPELR.Q                | 3 | 3.86 | 0.25 | -2.09 |
| IPI00021842 | Apolipoprotein E precursor   | K.AYKSELEEQLTPVAEETR.A             | 2 | 6.36 | 0.59 | -2.39 |
| IPI00021842 | Apolipoprotein E precursor   | K.AYKSELEEQLTPVAEETR.A             | 3 | 4.53 | 0.39 | -2.67 |
| IPI00021842 | Apolipoprotein E precursor   | K.AYKSELEEQLTPVAEETRAR.L           | 3 | 3.92 | 0.44 | -4.99 |
| IPI00021842 | Apolipoprotein E precursor   | K.AYKSELEEQLTPVAEETRAR.L           | 4 | 4.29 | 0.32 | -3.65 |
| IPI00021842 | Apolipoprotein E precursor   | K.ELKAYKSELEEQLTPVAEETR.A          | 3 | 3.47 | 0.20 | -3.11 |
| IPI00021842 | Apolipoprotein E precursor   | K.LEEQAAQIR.L                      | 2 | 3.66 | 0.10 | -5.55 |
| IPI00021842 | Apolipoprotein E precursor   | K.RLAVYQAGAR.E                     | 2 | 3.80 | 0.33 | -3.66 |
| IPI00021842 | Apolipoprotein E precursor   | K.RLAVYQAGAREGAER.G                | 3 | 2.76 | 0.18 |       |
| IPI00021842 | Apolipoprotein E precursor   | K.SELEEQLTPVAEETR.A                | 1 | 3.24 | 0.38 |       |
| IPI00021842 | Apolipoprotein E precursor   | K.SELEEQLTPVAEETR.A                | 2 | 5.53 | 0.51 | -3.20 |
| IPI00021842 | Apolipoprotein E precursor   | K.SELEEQLTPVAEETR.A                | 3 | 4.71 | 0.45 | -0.84 |
| IPI00021842 | Apolipoprotein E precursor   | K.SWFEPLVEDM*QR.Q                  | 2 | 4.12 | 0.46 | -4.20 |
| IPI00021842 | Apolipoprotein E precursor   | K.SWFEPLVEDM*QR.Q                  | 3 | 3.74 | 0.19 | -1.73 |
| IPI00021842 | Apolipoprotein E precursor   | K.SWFEPLVEDMQR.Q                   | 1 | 3.25 | 0.31 |       |
| IPI00021842 | Apolipoprotein E precursor   | K.SWFEPLVEDMQR.Q                   | 2 | 4.42 | 0.20 |       |
| IPI00021842 | Apolipoprotein E precursor   | K.SWFEPLVEDMQR.Q                   | 3 | 4.74 | 0.25 |       |
| IPI00021842 | Apolipoprotein E precursor   | K.VEQAVETEPEPELR.Q                 | 2 | 4.52 | 0.41 | -2.95 |
| IPI00021842 | Apolipoprotein E precursor   | K.VQAAVGTSAAPVPSDNH.-              | 1 | 3.22 | 0.51 | -2.94 |
| IPI00021842 | Apolipoprotein E precursor   | K.VQAAVGTSAAPVPSDNH.-              | 2 | 5.91 | 0.62 | -4.69 |

|             |                            |                        |   |      |      |       |
|-------------|----------------------------|------------------------|---|------|------|-------|
| IPI00021842 | Apolipoprotein E precursor | K.VQAAVGTSAAPVPSDNH.-  | 3 | 3.45 | 0.30 | -3.10 |
| IPI00021842 | Apolipoprotein E precursor | L.GPLVEQGR.V           | 1 | 1.86 | 0.18 | -1.33 |
| IPI00021842 | Apolipoprotein E precursor | L.SEQVQEELLSSQVTQELR.A | 2 | 3.15 | 0.21 | 0.42  |
| IPI00021842 | Apolipoprotein E precursor | L.SKELQAAQAR.L         | 2 | 3.32 | 0.27 | 0.26  |
| IPI00021842 | Apolipoprotein E precursor | R.AATVGSAGQPLQER.A     | 1 | 3.34 | 0.36 | -4.10 |
| IPI00021842 | Apolipoprotein E precursor | R.AATVGSAGQPLQER.A     | 2 | 4.53 | 0.47 | -3.64 |
| IPI00021842 | Apolipoprotein E precursor | R.AATVGSAGQPLQER.A     | 3 | 3.64 | 0.37 | -2.26 |
| IPI00021842 | Apolipoprotein E precursor | R.AKLEEQAQQIR.L        | 1 | 2.57 | 0.21 | -3.71 |
| IPI00021842 | Apolipoprotein E precursor | R.AKLEEQAQQIR.L        | 2 | 4.17 | 0.29 | -3.70 |
| IPI00021842 | Apolipoprotein E precursor | R.AKLEEQAQQIR.L        | 3 | 4.56 | 0.21 | -4.56 |
| IPI00021842 | Apolipoprotein E precursor | R.ALM*DETM*K.E         | 1 | 1.57 | 0.09 | -3.21 |
| IPI00021842 | Apolipoprotein E precursor | R.ALM*DETM*K.E         | 2 | 2.64 | 0.21 | -3.35 |
| IPI00021842 | Apolipoprotein E precursor | R.ALM*DETM*KELK.A      | 1 | 2.24 | 0.21 | -2.46 |
| IPI00021842 | Apolipoprotein E precursor | R.ALM*DETM*KELK.A      | 2 | 2.76 | 0.17 | -2.82 |
| IPI00021842 | Apolipoprotein E precursor | R.ALM*DETMKELK.A       | 1 | 2.78 | 0.25 |       |
| IPI00021842 | Apolipoprotein E precursor | R.ALM*DETMKELK.A       | 2 | 2.82 | 0.10 |       |
| IPI00021842 | Apolipoprotein E precursor | R.ALMDETM*KELK.A       | 1 | 2.88 | 0.14 |       |
| IPI00021842 | Apolipoprotein E precursor | R.ALMDETM*KELK.A       | 2 | 2.76 | 0.22 |       |
| IPI00021842 | Apolipoprotein E precursor | R.ALMDETMKELK.A        | 2 | 2.95 | 0.28 |       |
| IPI00021842 | Apolipoprotein E precursor | R.AQAWGER.L            | 1 | 1.58 | 0.17 | -2.36 |
| IPI00021842 | Apolipoprotein E precursor | R.ARLSKELQAAQAR.L      | 3 | 3.76 | 0.10 |       |
| IPI00021842 | Apolipoprotein E precursor | R.DADDLQKR.L           | 2 | 2.32 | 0.06 | -2.65 |
| IPI00021842 | Apolipoprotein E precursor | R.DRLDEVK.E            | 1 | 1.71 | 0.19 | -2.95 |
| IPI00021842 | Apolipoprotein E precursor | R.DRLDEVKEQVAEVR.A     | 1 | 2.52 | 0.18 |       |
| IPI00021842 | Apolipoprotein E precursor | R.DRLDEVKEQVAEVR.A     | 2 | 4.05 | 0.28 | -4.28 |
| IPI00021842 | Apolipoprotein E precursor | R.DRLDEVKEQVAEVR.A     | 3 | 4.25 | 0.31 | -2.63 |
| IPI00021842 | Apolipoprotein E precursor | R.DRLDEVKEQVAEVR.A     | 4 | 3.25 | 0.26 | -4.15 |
| IPI00021842 | Apolipoprotein E precursor | R.ERLGPLVEQGR.V        | 2 | 3.78 | 0.24 | -3.19 |
| IPI00021842 | Apolipoprotein E precursor | R.ERLGPLVEQGR.V        | 3 | 2.34 | 0.08 | -4.90 |
| IPI00021842 | Apolipoprotein E precursor | R.GEVQAM*LGQSTEELR.V   | 2 | 5.19 | 0.49 | -4.19 |
| IPI00021842 | Apolipoprotein E precursor | R.GEVQAM*LGQSTEELR.V   | 3 | 3.97 | 0.35 | -2.35 |
| IPI00021842 | Apolipoprotein E precursor | R.GEVQAM*LGQSTEELRVR.L | 2 | 1.29 | 0.05 | -2.51 |
| IPI00021842 | Apolipoprotein E precursor | R.GEVQAM*LGQSTEELRVR.L | 3 | 2.73 | 0.36 | -2.12 |
| IPI00021842 | Apolipoprotein E precursor | R.GEVQAMLGQSTEELR.V    | 1 | 3.08 | 0.26 |       |
| IPI00021842 | Apolipoprotein E precursor | R.GEVQAMLGQSTEELR.V    | 2 | 5.46 | 0.32 |       |
| IPI00021842 | Apolipoprotein E precursor | R.GEVQAMLGQSTEELR.V    | 3 | 3.42 | 0.10 |       |
| IPI00021842 | Apolipoprotein E precursor | R.GEVQAMLGQSTEELRVR.L  | 2 | 3.44 | 0.18 |       |
| IPI00021842 | Apolipoprotein E precursor | R.GEVQAMLGQSTEELRVR.L  | 3 | 2.72 | 0.18 |       |
| IPI00021842 | Apolipoprotein E precursor | R.GLSAIRER.L           | 2 | 2.34 | 0.13 | -2.50 |
| IPI00021842 | Apolipoprotein E precursor | R.LAVYQAGAR.E          | 1 | 2.22 | 0.25 | -3.45 |
| IPI00021842 | Apolipoprotein E precursor | R.LAVYQAGAR.E          | 2 | 3.24 | 0.27 | -3.07 |
| IPI00021842 | Apolipoprotein E precursor | R.LDEVKEQVAEVR.A       | 1 | 3.07 | 0.17 |       |

|             |                               |                             |   |      |      |       |
|-------------|-------------------------------|-----------------------------|---|------|------|-------|
| IPI00021842 | Apolipoprotein E precursor    | R.LDEVKEQVAEVR.A            | 2 | 4.15 | 0.42 | -2.43 |
| IPI00021842 | Apolipoprotein E precursor    | R.LDEVKEQVAEVR.A            | 3 | 3.90 | 0.30 | -1.09 |
| IPI00021842 | Apolipoprotein E precursor    | R.LGADM*EDVCGR.L            | 1 | 1.21 | 0.11 | -3.35 |
| IPI00021842 | Apolipoprotein E precursor    | R.LGADM*EDVCGR.L            | 2 | 3.84 | 0.38 | -4.75 |
| IPI00021842 | Apolipoprotein E precursor    | R.LGADMEDVCGR.L             | 2 | 3.68 | 0.42 |       |
| IPI00021842 | Apolipoprotein E precursor    | R.LGPLVEQGR.V               | 1 | 2.22 | 0.25 | -3.68 |
| IPI00021842 | Apolipoprotein E precursor    | R.LGPLVEQGR.V               | 2 | 3.37 | 0.23 | -2.15 |
| IPI00021842 | Apolipoprotein E precursor    | R.LKSWFEPLVEDM*QR.Q         | 2 | 4.64 | 0.45 | -3.82 |
| IPI00021842 | Apolipoprotein E precursor    | R.LKSWFEPLVEDM*QR.Q         | 3 | 4.70 | 0.32 | -3.73 |
| IPI00021842 | Apolipoprotein E precursor    | R.LKSWFEPLVEDMQR.Q          | 1 | 3.59 | 0.36 |       |
| IPI00021842 | Apolipoprotein E precursor    | R.LKSWFEPLVEDMQR.Q          | 2 | 4.57 | 0.41 |       |
| IPI00021842 | Apolipoprotein E precursor    | R.LKSWFEPLVEDMQR.Q          | 3 | 5.16 | 0.29 |       |
| IPI00021842 | Apolipoprotein E precursor    | R.LLRDADDLQK.R              | 1 | 1.87 | 0.05 | -3.17 |
| IPI00021842 | Apolipoprotein E precursor    | R.LLRDADDLQKR.L             | 1 | 1.85 | 0.25 |       |
| IPI00021842 | Apolipoprotein E precursor    | R.LLRDADDLQKR.L             | 2 | 3.40 | 0.32 | -4.42 |
| IPI00021842 | Apolipoprotein E precursor    | R.LLRDADDLQKR.L             | 3 | 3.78 | 0.15 | -2.46 |
| IPI00021842 | Apolipoprotein E precursor    | R.LQAEAFQAR.L               | 1 | 2.69 | 0.12 | -0.43 |
| IPI00021842 | Apolipoprotein E precursor    | R.LQAEAFQAR.L               | 2 | 2.95 | 0.23 | -3.17 |
| IPI00021842 | Apolipoprotein E precursor    | R.LSKELQAAQAR.L             | 1 | 2.82 | 0.35 | -3.00 |
| IPI00021842 | Apolipoprotein E precursor    | R.LSKELQAAQAR.L             | 2 | 4.25 | 0.30 | -7.09 |
| IPI00021842 | Apolipoprotein E precursor    | R.LSKELQAAQAR.L             | 3 | 4.21 | 0.30 | -4.81 |
| IPI00021842 | Apolipoprotein E precursor    | R.LVQYRGEVQAM*LGQSTEELR.V   | 2 | 2.09 | 0.24 |       |
| IPI00021842 | Apolipoprotein E precursor    | R.LVQYRGEVQAM*LGQSTEELR.V   | 3 | 4.82 | 0.44 | -6.42 |
| IPI00021842 | Apolipoprotein E precursor    | R.LVQYRGEVQAM*LGQSTEELR.V   | 4 | 2.70 | 0.23 | -2.97 |
| IPI00021842 | Apolipoprotein E precursor    | R.LVQYRGEVQAMLGQSTEELR.V    | 2 | 5.52 | 0.42 |       |
| IPI00021842 | Apolipoprotein E precursor    | R.LVQYRGEVQAMLGQSTEELR.V    | 3 | 3.62 | 0.21 |       |
| IPI00021842 | Apolipoprotein E precursor    | R.QQTEWQSGQR.W              | 2 | 2.46 | 0.30 | -2.71 |
| IPI00021842 | Apolipoprotein E precursor    | R.QWAGLVEK.V                | 1 | 1.73 | 0.11 | -2.52 |
| IPI00021842 | Apolipoprotein E precursor    | R.QWAGLVEK.V                | 2 | 1.55 | 0.08 | -1.75 |
| IPI00021842 | Apolipoprotein E precursor    | R.TRDRLDEVKEQVAEVR.A        | 2 | 3.61 | 0.23 | -4.42 |
| IPI00021842 | Apolipoprotein E precursor    | R.TRDRLDEVKEQVAEVR.A        | 3 | 3.53 | 0.33 | -3.67 |
| IPI00021842 | Apolipoprotein E precursor    | R.TRDRLDEVKEQVAEVR.A        | 4 | 3.38 | 0.28 | -2.89 |
| IPI00021842 | Apolipoprotein E precursor    | R.VRAATVGSAGQPLQER.A        | 2 | 5.02 | 0.48 | -4.02 |
| IPI00021842 | Apolipoprotein E precursor    | R.VRAATVGSAGQPLQER.A        | 3 | 4.06 | 0.30 | -2.63 |
| IPI00021842 | Apolipoprotein E precursor    | R.WELALGR.F                 | 1 | 2.13 | 0.05 | -1.70 |
| IPI00021842 | Apolipoprotein E precursor    | R.WELALGR.F                 | 2 | 2.15 | 0.08 | -1.45 |
| IPI00021842 | Apolipoprotein E precursor    | R.WVQTLSEVQVEELLSSQVTQELR.A | 2 | 6.29 | 0.58 | -4.58 |
| IPI00021842 | Apolipoprotein E precursor    | R.WVQTLSEVQVEELLSSQVTQELR.A | 3 | 5.94 | 0.39 | -4.90 |
| IPI00021842 | Apolipoprotein E precursor    | V.GSLAGQPLQER.A             | 1 | 2.09 | 0.20 | -2.55 |
| IPI00021842 | Apolipoprotein E precursor    | W.VQTLSEVQVEELLSSQVTQELR.A  | 3 | 4.95 | 0.31 | -5.48 |
| IPI00021854 | Apolipoprotein A-II precursor | K.AGTELVNFLSYFVELGTQPA.T    | 2 | 5.00 | 0.42 |       |
| IPI00021854 | Apolipoprotein A-II precursor | K.AGTELVNFLSYFVELGTQPAT.Q   | 2 | 5.83 | 0.47 |       |

|             |                                |                                   |   |      |      |       |
|-------------|--------------------------------|-----------------------------------|---|------|------|-------|
| IPI00021854 | Apolipoprotein A-II precursor  | K.AGTELVNFLSYFVELGTQPATQ.-        | 2 | 4.88 | 0.29 |       |
| IPI00021854 | Apolipoprotein A-II precursor  | K.AGTELVNFLSYFVELGTQPATQ.-        | 3 | 5.16 | 0.42 |       |
| IPI00021854 | Apolipoprotein A-II precursor  | K.EPCVESLVSQYFQTVTDYGK.D          | 2 | 5.07 | 0.49 | -3.93 |
| IPI00021854 | Apolipoprotein A-II precursor  | K.EPCVESLVSQYFQTVTDYGK.D          | 3 | 3.88 | 0.39 |       |
| IPI00021854 | Apolipoprotein A-II precursor  | K.EPCVESLVSQYFQTVTDYGKDLM*EK.V    | 2 | 4.20 | 0.42 |       |
| IPI00021854 | Apolipoprotein A-II precursor  | K.EPCVESLVSQYFQTVTDYGKDLM*EK.V    | 3 | 3.32 | 0.36 |       |
| IPI00021854 | Apolipoprotein A-II precursor  | K.EPCVESLVSQYFQTVTDYGKDLMEK.V     | 2 | 3.15 | 0.36 |       |
| IPI00021854 | Apolipoprotein A-II precursor  | K.EPCVESLVSQYFQTVTDYGKDLMEK.V     | 3 | 3.11 | 0.28 |       |
| IPI00021854 | Apolipoprotein A-II precursor  | K.KAGTELVNFLSYFVELGTQPA.T         | 2 | 4.94 | 0.25 |       |
| IPI00021854 | Apolipoprotein A-II precursor  | K.KAGTELVNFLSYFVELGTQPAT.Q        | 2 | 5.20 | 0.47 |       |
| IPI00021854 | Apolipoprotein A-II precursor  | K.KAGTELVNFLSYFVELGTQPATQ.-       | 2 | 5.84 | 0.48 |       |
| IPI00021854 | Apolipoprotein A-II precursor  | K.KAGTELVNFLSYFVELGTQPATQ.-       | 3 | 2.44 | 0.29 | -4.10 |
| IPI00021854 | Apolipoprotein A-II precursor  | K.SKEQLTPLIK.K                    | 1 | 2.72 | 0.22 |       |
| IPI00021854 | Apolipoprotein A-II precursor  | K.SKEQLTPLIK.K                    | 2 | 2.47 | 0.20 | -1.93 |
| IPI00021854 | Apolipoprotein A-II precursor  | K.SKEQLTPLIKK.A                   | 2 | 3.41 | 0.20 |       |
| IPI00021854 | Apolipoprotein A-II precursor  | K.SKEQLTPLIKK.A                   | 3 | 3.50 | 0.21 |       |
| IPI00021854 | Apolipoprotein A-II precursor  | K.SPELQAEAK.S                     | 1 | 2.63 | 0.17 |       |
| IPI00021854 | Apolipoprotein A-II precursor  | K.SPELQAEAK.S                     | 2 | 3.48 | 0.12 |       |
| IPI00021854 | Apolipoprotein A-II precursor  | K.SYFEKSKEQLTPLIK.K               | 2 | 4.06 | 0.36 |       |
| IPI00021854 | Apolipoprotein A-II precursor  | K.SYFEKSKEQLTPLIK.K               | 3 | 2.32 | 0.16 |       |
| IPI00021854 | Apolipoprotein A-II precursor  | K.SYFEKSKEQLTPLIKK.A              | 3 | 2.58 | 0.37 |       |
| IPI00021854 | Apolipoprotein A-II precursor  | K.VKSPELQAEAK.S                   | 1 | 2.54 | 0.23 |       |
| IPI00021854 | Apolipoprotein A-II precursor  | K.VKSPELQAEAK.S                   | 2 | 2.65 | 0.15 | -3.71 |
| IPI00021854 | Apolipoprotein A-II precursor  | K.VKSPELQAEAK.S                   | 3 | 4.01 | 0.15 |       |
| IPI00021854 | Apolipoprotein A-II precursor  | R.QAKEPCVESLVSQYFQTVTDYGK.D       | 2 | 2.75 | 0.38 |       |
| IPI00021854 | Apolipoprotein A-II precursor  | R.QAKEPCVESLVSQYFQTVTDYGK.D       | 3 | 5.98 | 0.46 |       |
| IPI00021854 | Apolipoprotein A-II precursor  | R.QAKEPCVESLVSQYFQTVTDYGKDLM*EK.V | 3 | 2.66 | 0.28 |       |
| IPI00021855 | Apolipoprotein C-I precursor   | G.TPDVSSALDKLKEFGNTLEDK.A         | 2 | 5.96 | 0.44 |       |
| IPI00021855 | Apolipoprotein C-I precursor   | K.LKEFGNTLEDKAR.E                 | 2 | 3.12 | 0.23 |       |
| IPI00021855 | Apolipoprotein C-I precursor   | K.M*REWFSETFQK.V                  | 2 | 2.73 | 0.17 |       |
| IPI00021855 | Apolipoprotein C-I precursor   | R.IKQSELSAK.M                     | 2 | 2.52 | 0.07 | -2.24 |
| IPI00021856 | Apolipoprotein C-II precursor  | G.TQQPQQDEM*PSPFTLQVK.E           | 2 | 5.31 | 0.39 |       |
| IPI00021856 | Apolipoprotein C-II precursor  | K.STAAM*STYTGIFTDQVLSVLKGEE.-     | 2 | 4.45 | 0.38 |       |
| IPI00021856 | Apolipoprotein C-II precursor  | K.STAAMSTYTGIFTDQVLSVLK.G         | 2 | 3.53 | 0.22 |       |
| IPI00021856 | Apolipoprotein C-II precursor  | K.STAAMSTYTGIFTDQVLSVLKGEE.-      | 2 | 4.27 | 0.38 |       |
| IPI00021856 | Apolipoprotein C-II precursor  | K.TAAQNLYEK.T                     | 2 | 1.70 | 0.06 | 0.41  |
| IPI00021857 | Apolipoprotein C-III precursor | A.SEAEDASLLSFMQGYM*K.H            | 2 | 5.33 | 0.38 |       |
| IPI00021857 | Apolipoprotein C-III precursor | K.DALSSVQESQVAQQAR.G              | 2 | 4.82 | 0.35 | -2.42 |
| IPI00021857 | Apolipoprotein C-III precursor | K.DALSSVQESQVAQQAR.G              | 3 | 3.98 | 0.35 | -1.33 |
| IPI00021857 | Apolipoprotein C-III precursor | K.TAKDALSSVQESQVAQQAR.G           | 2 | 6.55 | 0.41 |       |
| IPI00021857 | Apolipoprotein C-III precursor | K.TAKDALSSVQESQVAQQAR.G           | 3 | 4.76 | 0.24 |       |
| IPI00021857 | Apolipoprotein C-III precursor | R.GWVTDGFSSLK.D                   | 2 | 3.21 | 0.34 |       |

|             |                                               |                                             |   |      |      |       |
|-------------|-----------------------------------------------|---------------------------------------------|---|------|------|-------|
| IPI00021857 | Apolipoprotein C-III precursor                | R.GWVTDGFSSLKDYWSTVK.D                      | 2 | 4.63 | 0.47 |       |
| IPI00021857 | Apolipoprotein C-III precursor                | R.GWVTDGFSSLKDYWSTVK.D                      | 3 | 2.43 | 0.18 |       |
| IPI00021885 | Isoform 1 of Fibrinogen alpha chain precursor | A.DSGEGDFLAEGGGVR.G                         | 2 | 5.20 | 0.44 | -6.02 |
| IPI00021885 | Isoform 1 of Fibrinogen alpha chain precursor | D.SGEGDFLAEGGGVR.G                          | 2 | 4.59 | 0.33 | -2.03 |
| IPI00021885 | Isoform 1 of Fibrinogen alpha chain precursor | K.ALTDMPQM*R.M                              | 2 | 2.32 | 0.22 | 1.05  |
| IPI00021885 | Isoform 1 of Fibrinogen alpha chain precursor | K.DSHSLTTNIM*EILR.G                         | 3 | 3.52 | 0.16 | -1.25 |
| IPI00021885 | Isoform 1 of Fibrinogen alpha chain precursor | K.ESSSHHPGIAEFPSR.G                         | 2 | 2.86 | 0.23 |       |
| IPI00021885 | Isoform 1 of Fibrinogen alpha chain precursor | K.ESSSHHPGIAEFPSR.G                         | 3 | 1.85 | 0.15 | -3.72 |
| IPI00021885 | Isoform 1 of Fibrinogen alpha chain precursor | K.EVTKEVVTSEDGSDCPEAM*DLGTLSGIGTLDGFR.H     | 3 | 6.72 | 0.54 |       |
| IPI00021885 | Isoform 1 of Fibrinogen alpha chain precursor | K.EVTKEVVTSEDGSDCPEAMDLGTLSGIGTLDGFR.H      | 3 | 5.86 | 0.49 |       |
| IPI00021885 | Isoform 1 of Fibrinogen alpha chain precursor | K.EVVTSEDGSDCPEAM*DLGTLSGIGTLDGFR.H         | 2 | 4.73 | 0.39 |       |
| IPI00021885 | Isoform 1 of Fibrinogen alpha chain precursor | K.EVVTSEDGSDCPEAM*DLGTLSGIGTLDGFR.H         | 3 | 6.18 | 0.52 |       |
| IPI00021885 | Isoform 1 of Fibrinogen alpha chain precursor | K.GLIDEVNQDFTNR.I                           | 2 | 3.96 | 0.41 |       |
| IPI00021885 | Isoform 1 of Fibrinogen alpha chain precursor | K.LKNSLFEYQK.N                              | 2 | 2.74 | 0.27 |       |
| IPI00021885 | Isoform 1 of Fibrinogen alpha chain precursor | K.LVTSKGDKELR.T                             | 2 | 3.37 | 0.28 |       |
| IPI00021885 | Isoform 1 of Fibrinogen alpha chain precursor | K.M*ADEAGSEADHEGTHSTKR.G                    | 3 | 2.95 | 0.13 |       |
| IPI00021885 | Isoform 1 of Fibrinogen alpha chain precursor | K.NNKDSHSLTTNIM*EILR.G                      | 2 | 5.01 | 0.38 |       |
| IPI00021885 | Isoform 1 of Fibrinogen alpha chain precursor | K.NSLFEYQK.N                                | 1 | 2.42 | 0.12 |       |
| IPI00021885 | Isoform 1 of Fibrinogen alpha chain precursor | K.QFTSSTSYNR.G                              | 2 | 2.19 | 0.25 |       |
| IPI00021885 | Isoform 1 of Fibrinogen alpha chain precursor | K.QFTSSTSYNRGDSTFESK.S                      | 2 | 4.06 | 0.34 |       |
| IPI00021885 | Isoform 1 of Fibrinogen alpha chain precursor | K.TFPGFFSPM*LGEFVSETESR.G                   | 2 | 4.17 | 0.40 |       |
| IPI00021885 | Isoform 1 of Fibrinogen alpha chain precursor | K.TFPGFFSPM*LGEFVSETESR.G                   | 3 | 4.78 | 0.39 |       |
| IPI00021885 | Isoform 1 of Fibrinogen alpha chain precursor | K.TFPGFFSPMLGEFVSETESR.G                    | 2 | 5.07 | 0.34 |       |
| IPI00021885 | Isoform 1 of Fibrinogen alpha chain precursor | K.TVIGPDGHKEVTK.E                           | 2 | 3.68 | 0.31 |       |
| IPI00021885 | Isoform 1 of Fibrinogen alpha chain precursor | K.TVIGPDGHKEVTKEDGSDCPEAM*DLGTLSGIGTLDGFR.H | 3 | 4.54 | 0.31 |       |
| IPI00021885 | Isoform 1 of Fibrinogen alpha chain precursor | K.VQHIQLLQK.N                               | 1 | 2.64 | 0.15 |       |
| IPI00021885 | Isoform 1 of Fibrinogen alpha chain precursor | K.VQHIQLLQK.N                               | 2 | 2.48 | 0.15 |       |
| IPI00021885 | Isoform 1 of Fibrinogen alpha chain precursor | R.EVDLKDYEDQKQ.Q                            | 2 | 3.98 | 0.14 |       |
| IPI00021885 | Isoform 1 of Fibrinogen alpha chain precursor | R.EVDLKDYEDQKQLEQVIAK.D                     | 2 | 4.47 | 0.38 |       |
| IPI00021885 | Isoform 1 of Fibrinogen alpha chain precursor | R.GDFSSANNR.D                               | 2 | 2.22 | 0.13 |       |
| IPI00021885 | Isoform 1 of Fibrinogen alpha chain precursor | R.GDFSSANNRDNTYNR.V                         | 2 | 2.37 | 0.17 |       |
| IPI00021885 | Isoform 1 of Fibrinogen alpha chain precursor | R.GGSTSYGTGSETESPR.N                        | 2 | 4.33 | 0.55 | -3.28 |
| IPI00021885 | Isoform 1 of Fibrinogen alpha chain precursor | R.GGSTSYGTGSETESPRN.P                       | 2 | 3.95 | 0.55 | -3.91 |
| IPI00021885 | Isoform 1 of Fibrinogen alpha chain precursor | R.GGSTSYGTGSETESPRNPSSAGSWNSGSSGPGSTGNR.N   | 3 | 7.35 | 0.55 |       |
| IPI00021885 | Isoform 1 of Fibrinogen alpha chain precursor | R.GSESGIFTNTK.E                             | 1 | 2.46 | 0.13 |       |
| IPI00021885 | Isoform 1 of Fibrinogen alpha chain precursor | R.GSESGIFTNTK.E                             | 2 | 2.82 | 0.32 | -1.59 |
| IPI00021885 | Isoform 1 of Fibrinogen alpha chain precursor | R.HPDEAAFFDTASTGK.T                         | 2 | 2.96 | 0.28 |       |
| IPI00021885 | Isoform 1 of Fibrinogen alpha chain precursor | R.HRHPDEAAFFDTASTGK.T                       | 2 | 4.59 | 0.39 |       |
| IPI00021885 | Isoform 1 of Fibrinogen alpha chain precursor | R.M*ELERPGGNEITR.G                          | 3 | 2.78 | 0.17 |       |
| IPI00021885 | Isoform 1 of Fibrinogen alpha chain precursor | R.M*KGLIDEVNQDFTNR.I                        | 2 | 3.76 | 0.24 |       |
| IPI00021885 | Isoform 1 of Fibrinogen alpha chain precursor | R.M*KGLIDEVNQDFTNR.I                        | 3 | 4.38 | 0.16 |       |
| IPI00021885 | Isoform 1 of Fibrinogen alpha chain precursor | R.MKGLIDEVNQDFTNR.I                         | 3 | 3.99 | 0.21 |       |



|             |                                                     |                                    |   |      |      |       |
|-------------|-----------------------------------------------------|------------------------------------|---|------|------|-------|
| IPI00021885 | Isoform 1 of Fibrinogen alpha chain precursor       | T.ADSGEGDFLAEGGGVR.G               | 2 | 4.92 | 0.40 | -5.07 |
| IPI00021891 | Isoform Gamma-B of Fibrinogen gamma chain precursor | K.AIQLTYNPDESSKPNM*IDAATLK.S       | 2 | 3.98 | 0.32 |       |
| IPI00021891 | Isoform Gamma-B of Fibrinogen gamma chain precursor | K.AIQLTYNPDESSKPNM*IDAATLK.S       | 3 | 2.95 | 0.30 | -2.35 |
| IPI00021891 | Isoform Gamma-B of Fibrinogen gamma chain precursor | K.AIQLTYNPDESSKPNMIDAATLK.S        | 2 | 4.25 | 0.35 |       |
| IPI00021891 | Isoform Gamma-B of Fibrinogen gamma chain precursor | K.AIQLTYNPDESSKPNMIDAATLK.S        | 3 | 3.87 | 0.32 |       |
| IPI00021891 | Isoform Gamma-B of Fibrinogen gamma chain precursor | K.ASTPNGYDNGIHWATWK.T              | 2 | 4.75 | 0.35 |       |
| IPI00021891 | Isoform Gamma-B of Fibrinogen gamma chain precursor | K.EGFGHLSPTGTTEFWLGNEK.I           | 2 | 5.42 | 0.41 |       |
| IPI00021891 | Isoform Gamma-B of Fibrinogen gamma chain precursor | K.EGFGHLSPTGTTEFWLGNEK.I           | 3 | 4.21 | 0.31 |       |
| IPI00021891 | Isoform Gamma-B of Fibrinogen gamma chain precursor | K.IHLISTQSAIPYALR.V                | 2 | 5.04 | 0.40 |       |
| IPI00021891 | Isoform Gamma-B of Fibrinogen gamma chain precursor | K.QSGLYFIKPLK.A                    | 2 | 2.36 | 0.21 |       |
| IPI00021891 | Isoform Gamma-B of Fibrinogen gamma chain precursor | K.VAQLAQCEPCKDTVQIHDITGK.D         | 2 | 3.29 | 0.08 |       |
| IPI00021891 | Isoform Gamma-B of Fibrinogen gamma chain precursor | K.VAQLAQCEPCKDTVQIHDITGK.D         | 3 | 5.52 | 0.44 |       |
| IPI00021891 | Isoform Gamma-B of Fibrinogen gamma chain precursor | K.VAQLAQCEPCKDTVQIHDITGKDCQDIANK.G | 3 | 4.78 | 0.28 |       |
| IPI00021891 | Isoform Gamma-B of Fibrinogen gamma chain precursor | K.VGPEADKYR.L                      | 2 | 2.16 | 0.21 |       |
| IPI00021891 | Isoform Gamma-B of Fibrinogen gamma chain precursor | K.YEASILTHDSSIR.Y                  | 2 | 4.12 | 0.45 |       |
| IPI00021891 | Isoform Gamma-B of Fibrinogen gamma chain precursor | K.YEASILTHDSSIR.Y                  | 3 | 2.47 | 0.20 |       |
| IPI00021891 | Isoform Gamma-B of Fibrinogen gamma chain precursor | R.DNCCILDER.F                      | 2 | 3.10 | 0.20 |       |
| IPI00021891 | Isoform Gamma-B of Fibrinogen gamma chain precursor | R.FGSYCPTTCGIADFLSTYQTK.V          | 2 | 5.27 | 0.45 |       |
| IPI00021891 | Isoform Gamma-B of Fibrinogen gamma chain precursor | R.FGSYCPTTCGIADFLSTYQTK.V          | 3 | 4.45 | 0.33 |       |
| IPI00021891 | Isoform Gamma-B of Fibrinogen gamma chain precursor | R.KM*LEEIM*KYEASILTHDSSIR.Y        | 3 | 3.53 | 0.38 |       |
| IPI00021891 | Isoform Gamma-B of Fibrinogen gamma chain precursor | R.LDGSVDFK.K                       | 2 | 2.45 | 0.16 |       |
| IPI00021891 | Isoform Gamma-B of Fibrinogen gamma chain precursor | R.LDGSVDFK.N                       | 2 | 2.85 | 0.29 |       |

|             |                                                     |                                              |   |      |      |       |
|-------------|-----------------------------------------------------|----------------------------------------------|---|------|------|-------|
| IPI00021891 | Isoform Gamma-B of Fibrinogen gamma chain precursor | R.LTIGEGQQHHLGGAK.Q                          | 2 | 3.81 | 0.38 |       |
| IPI00021891 | Isoform Gamma-B of Fibrinogen gamma chain precursor | R.LTYAYFAGGDAGDAFDGDFGDDPSDK.F               | 2 | 5.17 | 0.54 |       |
| IPI00021891 | Isoform Gamma-B of Fibrinogen gamma chain precursor | R.TSTADYAM*FK.V                              | 1 | 2.16 | 0.22 |       |
| IPI00021891 | Isoform Gamma-B of Fibrinogen gamma chain precursor | R.TSTADYAM*FK.V                              | 2 | 2.94 | 0.29 |       |
| IPI00021891 | Isoform Gamma-B of Fibrinogen gamma chain precursor | R.YLQEIYNSNNQK.I                             | 2 | 5.32 | 0.31 |       |
| IPI00021900 | Tumor necrosis factor ligand superfamily member 12  | R.ASLSAQEPAQEELVAEEDQDPSELNPQTEESQDPAPFLNR.L | 3 | 6.34 | 0.57 | -2.85 |
| IPI00021900 | Tumor necrosis factor ligand superfamily member 12  | R.ASLSAQEPAQEELVAEEDQDPSELNPQTEESQDPAPFLNR.L | 4 | 4.11 | 0.50 | -2.80 |
| IPI00021903 | Isoform Alpha of ADAM 23 precursor                  | K.SVVNLVDSIYK.E                              | 2 | 2.85 | 0.26 | -1.87 |
| IPI00021903 | Isoform Alpha of ADAM 23 precursor                  | K.SVVNLVDSIYKEQLNTR.V                        | 2 | 4.26 | 0.52 | -2.36 |
| IPI00021903 | Isoform Alpha of ADAM 23 precursor                  | K.SVVNLVDSIYKEQLNTR.V                        | 3 | 3.26 | 0.45 | -3.19 |
| IPI00021903 | Isoform Alpha of ADAM 23 precursor                  | K.TLAGQYSK.Q                                 | 1 | 1.58 | 0.06 | -1.84 |
| IPI00021903 | Isoform Alpha of ADAM 23 precursor                  | K.TLAGQYSK.Q                                 | 2 | 1.89 | 0.08 | 0.22  |
| IPI00021903 | Isoform Alpha of ADAM 23 precursor                  | R.IGQLQGEIIPTSFYHQGR.V                       | 3 | 3.46 | 0.31 | -0.96 |
| IPI00021903 | Isoform Alpha of ADAM 23 precursor                  | R.LIYYINQDSESPYHV.L                          | 2 | 4.52 | 0.53 | -4.91 |
| IPI00021903 | Isoform Alpha of ADAM 23 precursor                  | R.LIYYINQDSESPYHVLDTK.A                      | 2 | 5.53 | 0.49 | -3.77 |
| IPI00021903 | Isoform Alpha of ADAM 23 precursor                  | R.LIYYINQDSESPYHVLDTK.A                      | 3 | 3.29 | 0.47 | -1.63 |
| IPI00021903 | Isoform Alpha of ADAM 23 precursor                  | R.SLSYFGGVCSSR.T                             | 2 | 2.75 | 0.34 | -2.19 |
| IPI00021907 | Isoform 1 of Myelin basic protein                   | R.TAHYGSLPQK.S                               | 2 | 2.32 | 0.16 | -2.05 |
| IPI00021951 | Uncharacterized protein KIAA0247 precursor          | R.SVPREQQLPDQGACSSA.G                        | 3 | 3.98 | 0.18 | 2.01  |
| IPI00021983 | Isoform 1 of Nicastrin precursor                    | K.ALADVATVLGR.A                              | 2 | 3.46 | 0.34 | -1.78 |
| IPI00021983 | Isoform 1 of Nicastrin precursor                    | K.GKFPVQLENVDSFVELGQVALR.T                   | 3 | 3.34 | 0.36 | -3.11 |
| IPI00021983 | Isoform 1 of Nicastrin precursor                    | K.SGAGVPAVILR.R                              | 2 | 2.56 | 0.28 | -1.49 |
| IPI00021983 | Isoform 1 of Nicastrin precursor                    | R.LLYGFLIK.A                                 | 2 | 2.14 | 0.09 | -2.23 |
| IPI00021983 | Isoform 1 of Nicastrin precursor                    | R.NQVEDLLATLEK.S                             | 2 | 2.85 | 0.41 | -3.35 |
| IPI00021985 | transmembrane 9 superfamily protein member 4        | R.ITEDYVVHLIADNLPVATR.L                      | 3 | 3.87 | 0.30 | -2.66 |
| IPI00021997 | Protein CREG1 precursor                             | K.IVTPEEYYNVTVQ.-                            | 2 | 2.44 | 0.18 | -2.49 |
| IPI00021997 | Protein CREG1 precursor                             | R.FVTHVSDWGALATISTLEAVR.G                    | 3 | 2.47 | 0.13 | -3.99 |
| IPI00022039 | Isoform 3 of SLAM family member 5 precursor         | K.TSVAYVTPGDSETAPVVTVTHR.N                   | 3 | 2.67 | 0.19 | -2.33 |
| IPI00022039 | Isoform 3 of SLAM family member 5 precursor         | R.IHALGPNYNLVISDLR.M                         | 2 | 3.57 | 0.43 | -4.28 |
| IPI00022039 | Isoform 3 of SLAM family member 5 precursor         | R.IHALGPNYNLVISDLR.M                         | 3 | 3.49 | 0.23 | -4.11 |
| IPI00022055 | Histone acetyltransferase PCAF                      | K.TKYVGYIKDYEGATLM*GCELNPR.I                 | 3 | 3.84 | 0.14 |       |
| IPI00022078 | Protein NDRG1                                       | R.SHTSEGAHLDITPNSGAAGNSAGPK.S                | 4 | 3.04 | 0.07 | -3.29 |
| IPI00022229 | Apolipoprotein B-100 precursor                      | K.ALVEQGFTVPEIK.T                            | 2 | 3.20 | 0.20 |       |
| IPI00022229 | Apolipoprotein B-100 precursor                      | K.ALYWVNGQVPDGVSK.V                          | 2 | 3.67 | 0.09 |       |
| IPI00022229 | Apolipoprotein B-100 precursor                      | K.AQNLYQELLTQEGQASFGQLKDNVFDGLVR.V           | 3 | 4.52 | 0.40 |       |

|             |                                |                                      |   |      |      |       |
|-------------|--------------------------------|--------------------------------------|---|------|------|-------|
| IPI00022229 | Apolipoprotein B-100 precursor | K.ATGVLYDYVNK.Y                      | 2 | 3.52 | 0.35 |       |
| IPI00022229 | Apolipoprotein B-100 precursor | K.AVSMPSFSILGSDVR.V                  | 2 | 4.17 | 0.41 |       |
| IPI00022229 | Apolipoprotein B-100 precursor | K.DKIGVELTGR.T                       | 2 | 2.38 | 0.14 |       |
| IPI00022229 | Apolipoprotein B-100 precursor | K.EVYGFNPEGK.A                       | 2 | 2.60 | 0.36 |       |
| IPI00022229 | Apolipoprotein B-100 precursor | K.FPEVDVLT.K.Y                       | 2 | 2.60 | 0.23 |       |
| IPI00022229 | Apolipoprotein B-100 precursor | K.FSVPAGIVIPSFQALTAR.F               | 2 | 3.89 | 0.45 | -3.40 |
| IPI00022229 | Apolipoprotein B-100 precursor | K.FSVPAGIVIPSFQALTAR.F               | 3 | 3.31 | 0.07 | -3.20 |
| IPI00022229 | Apolipoprotein B-100 precursor | K.FVTQAEGAK.Q                        | 2 | 2.86 | 0.14 |       |
| IPI00022229 | Apolipoprotein B-100 precursor | K.GFEPTLEALFGK.Q                     | 2 | 3.66 | 0.31 |       |
| IPI00022229 | Apolipoprotein B-100 precursor | K.GFEPTLEALFGKQGFPPDSV.NK.A          | 3 | 4.28 | 0.32 |       |
| IPI00022229 | Apolipoprotein B-100 precursor | K.GISTSAAASPAVGTVGM*DM*DEDDDFSK.W    | 2 | 3.61 | 0.30 |       |
| IPI00022229 | Apolipoprotein B-100 precursor | K.GISTSAAASPAVGTVGM*DM*DEDDDFSK.W    | 3 | 2.78 | 0.21 |       |
| IPI00022229 | Apolipoprotein B-100 precursor | K.GM*TRPLSTLISSSQSCQYTLDAK.R         | 2 | 4.30 | 0.35 |       |
| IPI00022229 | Apolipoprotein B-100 precursor | K.GM*TRPLSTLISSSQSCQYTLDAK.R         | 3 | 4.85 | 0.24 |       |
| IPI00022229 | Apolipoprotein B-100 precursor | K.GNVATEISTER.D                      | 2 | 3.32 | 0.36 |       |
| IPI00022229 | Apolipoprotein B-100 precursor | K.HVAEAICK.E                         | 2 | 2.55 | 0.14 |       |
| IPI00022229 | Apolipoprotein B-100 precursor | K.IADFELPTIIVPEQTIEIPSIK.F           | 2 | 3.18 | 0.35 | -3.71 |
| IPI00022229 | Apolipoprotein B-100 precursor | K.IADFELPTIIVPEQTIEIPSIK.F           | 3 | 4.08 | 0.13 |       |
| IPI00022229 | Apolipoprotein B-100 precursor | K.IAELSATAQEIIK.S                    | 2 | 4.29 | 0.29 |       |
| IPI00022229 | Apolipoprotein B-100 precursor | K.IEGLNLFDPNNYLPK.E                  | 2 | 4.19 | 0.19 |       |
| IPI00022229 | Apolipoprotein B-100 precursor | K.INNQLTLDSENTK.Y                    | 2 | 2.20 | 0.15 |       |
| IPI00022229 | Apolipoprotein B-100 precursor | K.KLTISEQNIQR.A                      | 2 | 3.20 | 0.28 | -2.73 |
| IPI00022229 | Apolipoprotein B-100 precursor | K.KM*GLAFESTK.S                      | 2 | 2.07 | 0.24 |       |
| IPI00022229 | Apolipoprotein B-100 precursor | K.LDVTTISGR.R                        | 2 | 2.77 | 0.25 |       |
| IPI00022229 | Apolipoprotein B-100 precursor | K.LKTQFNNEYSQDLDAYNTK.D              | 3 | 3.52 | 0.29 |       |
| IPI00022229 | Apolipoprotein B-100 precursor | K.LLSGGNTLHLVSTTK.T                  | 2 | 4.68 | 0.37 |       |
| IPI00022229 | Apolipoprotein B-100 precursor | K.LNDLNSVLVM*PTFHVPFTDLQVPSCK.L      | 3 | 4.54 | 0.36 |       |
| IPI00022229 | Apolipoprotein B-100 precursor | K.LNDLNSVLVMPFTFHVPFTDLQVPSCK.L      | 3 | 3.70 | 0.29 |       |
| IPI00022229 | Apolipoprotein B-100 precursor | K.LRTSSFALNPLTLPVVKFPEVDVLT.K.Y      | 3 | 5.08 | 0.23 |       |
| IPI00022229 | Apolipoprotein B-100 precursor | K.LTISEQNIQR.A                       | 2 | 3.19 | 0.16 | -2.19 |
| IPI00022229 | Apolipoprotein B-100 precursor | K.NFATSNKM*DM*TFSK.Q                 | 2 | 3.57 | 0.34 |       |
| IPI00022229 | Apolipoprotein B-100 precursor | K.NFVASHIANILNSEELDIQDLKK.L          | 3 | 6.94 | 0.46 |       |
| IPI00022229 | Apolipoprotein B-100 precursor | K.NKADYVETVLDSTCSSTVQFLEYELNVLGTHK.I | 3 | 5.08 | 0.40 |       |
| IPI00022229 | Apolipoprotein B-100 precursor | K.NPNGYSFSIPVK.V                     | 2 | 3.45 | 0.39 |       |
| IPI00022229 | Apolipoprotein B-100 precursor | K.NSEEFAM*SR.Y                       | 2 | 3.87 | 0.43 |       |
| IPI00022229 | Apolipoprotein B-100 precursor | K.QTVNLQLQPYSLVTTLNLDLKYNALDLTNGK.L  | 3 | 4.16 | 0.32 |       |
| IPI00022229 | Apolipoprotein B-100 precursor | K.QVFLYPEKDEPTYILNIK.R               | 2 | 4.81 | 0.19 |       |
| IPI00022229 | Apolipoprotein B-100 precursor | K.QVFLYPEKDEPTYILNIK.R.G             | 2 | 2.82 | 0.22 |       |
| IPI00022229 | Apolipoprotein B-100 precursor | K.SHDELPR.T                          | 2 | 1.65 | 0.06 | -3.18 |
| IPI00022229 | Apolipoprotein B-100 precursor | K.SKPTVSSSM*EFK.Y                    | 2 | 2.33 | 0.15 |       |
| IPI00022229 | Apolipoprotein B-100 precursor | K.SPAFTDLHLR.Y                       | 2 | 3.74 | 0.34 |       |
| IPI00022229 | Apolipoprotein B-100 precursor | K.SVGFHLPSR.E                        | 2 | 2.35 | 0.28 |       |

|             |                                |                                              |   |      |      |       |
|-------------|--------------------------------|----------------------------------------------|---|------|------|-------|
| IPI00022229 | Apolipoprotein B-100 precursor | K.SVSDGIAALDLNAVANK.I                        | 2 | 5.01 | 0.35 |       |
| IPI00022229 | Apolipoprotein B-100 precursor | K.SVSDGIAALDLNAVANK.I                        | 3 | 4.41 | 0.31 |       |
| IPI00022229 | Apolipoprotein B-100 precursor | K.SVSDGIAALDLNAVANKIADFELPTIIIVPEQTIEIPSIK.F | 3 | 4.06 | 0.24 |       |
| IPI00022229 | Apolipoprotein B-100 precursor | K.SVSLPSLDPASAK.I                            | 2 | 3.30 | 0.19 |       |
| IPI00022229 | Apolipoprotein B-100 precursor | K.TKNSEFAAAM*SR.Y                            | 2 | 4.74 | 0.43 |       |
| IPI00022229 | Apolipoprotein B-100 precursor | K.TNPTGTQELLDIANYLM*EQIQDDCTGDEDYTYLILR.V    | 3 | 3.40 | 0.31 |       |
| IPI00022229 | Apolipoprotein B-100 precursor | K.TSQCTLKEVYGFNPEGK.A                        | 2 | 4.99 | 0.38 |       |
| IPI00022229 | Apolipoprotein B-100 precursor | K.VELVLPQLCSFILK.T                           | 2 | 2.79 | 0.20 |       |
| IPI00022229 | Apolipoprotein B-100 precursor | K.VLVDHFGYTK.D                               | 2 | 2.05 | 0.17 |       |
| IPI00022229 | Apolipoprotein B-100 precursor | K.VNWEEEAASGLLTSKDNVPA.A                     | 3 | 3.53 | 0.33 |       |
| IPI00022229 | Apolipoprotein B-100 precursor | K.VPLLLSEPINIIDALEM*R.D                      | 3 | 4.43 | 0.16 |       |
| IPI00022229 | Apolipoprotein B-100 precursor | K.YDKNQDVHSINLPFFETLQEYFER.N                 | 3 | 4.57 | 0.25 |       |
| IPI00022229 | Apolipoprotein B-100 precursor | K.YGM*VAQVTQTLK.L                            | 2 | 4.02 | 0.40 |       |
| IPI00022229 | Apolipoprotein B-100 precursor | K.YSQPEDSLIPFFEITVPESQLTVSQFTLPK.S           | 2 | 3.56 | 0.22 |       |
| IPI00022229 | Apolipoprotein B-100 precursor | K.YSQPEDSLIPFFEITVPESQLTVSQFTLPK.S           | 3 | 3.32 | 0.33 | -4.95 |
| IPI00022229 | Apolipoprotein B-100 precursor | K.YTYNYEAESSGVPGTADSR.S                      | 2 | 6.34 | 0.50 |       |
| IPI00022229 | Apolipoprotein B-100 precursor | K.YTYNYEAESSGVPGTADSR.S                      | 3 | 4.90 | 0.26 |       |
| IPI00022229 | Apolipoprotein B-100 precursor | R.AALGKLPQQANDYLNFSNWER.Q                    | 2 | 2.88 | 0.13 |       |
| IPI00022229 | Apolipoprotein B-100 precursor | R.DLKVEDIPLAR.I                              | 2 | 3.37 | 0.11 |       |
| IPI00022229 | Apolipoprotein B-100 precursor | R.EYSGTIASEANTYLNK.S                         | 2 | 3.52 | 0.35 |       |
| IPI00022229 | Apolipoprotein B-100 precursor | R.HSITNPLAVLCEFISQSIK.S                      | 3 | 4.53 | 0.29 |       |
| IPI00022229 | Apolipoprotein B-100 precursor | R.IGQDGISSATTNLK.C                           | 2 | 3.87 | 0.37 |       |
| IPI00022229 | Apolipoprotein B-100 precursor | R.IHSGSFQSQVELSNDQEK.A                       | 3 | 3.49 | 0.12 |       |
| IPI00022229 | Apolipoprotein B-100 precursor | R.ILGEELGFASLHDLQLLQK.L                      | 2 | 4.70 | 0.36 |       |
| IPI00022229 | Apolipoprotein B-100 precursor | R.ILGEELGFASLHDLQLLQK.L                      | 3 | 2.84 | 0.34 | -3.29 |
| IPI00022229 | Apolipoprotein B-100 precursor | R.INCKVELEVPQLCSFILK.T                       | 2 | 5.49 | 0.33 |       |
| IPI00022229 | Apolipoprotein B-100 precursor | R.KGNVATEISTER.D                             | 2 | 3.72 | 0.33 |       |
| IPI00022229 | Apolipoprotein B-100 precursor | R.KYTYNYEAESSGVPGTADSR.S                     | 2 | 6.26 | 0.50 |       |
| IPI00022229 | Apolipoprotein B-100 precursor | R.LELELRPTGIEIQYSVSATYELQR.E                 | 3 | 4.83 | 0.20 |       |
| IPI00022229 | Apolipoprotein B-100 precursor | R.LNTDIAGLASAIDM*STNYNSDSLHFSNVFR.S          | 3 | 6.93 | 0.50 |       |
| IPI00022229 | Apolipoprotein B-100 precursor | R.LPYTIITPPLKDFSLWEK.T                       | 3 | 3.33 | 0.27 |       |
| IPI00022229 | Apolipoprotein B-100 precursor | R.M*NFKQELNGNTK.S                            | 2 | 4.15 | 0.20 |       |
| IPI00022229 | Apolipoprotein B-100 precursor | R.NLQNNAEWVYQGAIR.Q                          | 2 | 5.02 | 0.41 |       |
| IPI00022229 | Apolipoprotein B-100 precursor | R.NLQNNAEWVYQGAIR.Q                          | 3 | 3.90 | 0.19 |       |
| IPI00022229 | Apolipoprotein B-100 precursor | R.SEYQADYESLR.F                              | 2 | 3.10 | 0.21 |       |
| IPI00022229 | Apolipoprotein B-100 precursor | R.SPSQADINK.I                                | 2 | 2.65 | 0.10 |       |
| IPI00022229 | Apolipoprotein B-100 precursor | R.TFQIPGYTVPVVNVESPFTEIM*SAFGYVFPK.A         | 3 | 3.83 | 0.23 |       |
| IPI00022229 | Apolipoprotein B-100 precursor | R.TGISPLALIK.G                               | 2 | 2.82 | 0.31 | -1.33 |
| IPI00022229 | Apolipoprotein B-100 precursor | R.TLADLTLDDSPIKVPPLLLSEPINIIDALEM*R.D        | 3 | 3.76 | 0.36 | -4.01 |
| IPI00022229 | Apolipoprotein B-100 precursor | R.TSSFALNLPPLPEVKFPEVDVLTK.Y                 | 2 | 3.66 | 0.23 |       |
| IPI00022229 | Apolipoprotein B-100 precursor | R.TSSFALNLPPLPEVKFPEVDVLTK.Y                 | 3 | 4.00 | 0.42 | -2.36 |
| IPI00022229 | Apolipoprotein B-100 precursor | R.VIGNM*GQTM*EQLTPELK.S                      | 2 | 3.12 | 0.20 | -4.16 |

|             |                                                 |                                               |   |      |      |       |
|-------------|-------------------------------------------------|-----------------------------------------------|---|------|------|-------|
| IPI00022229 | Apolipoprotein B-100 precursor                  | R.VPSYTLILPSLELPVLHVPR.N                      | 3 | 5.05 | 0.44 | -3.83 |
| IPI00022229 | Apolipoprotein B-100 precursor                  | R.YEDGTLSLTSTSDLQSGIIK.N                      | 2 | 3.20 | 0.26 |       |
| IPI00022277 | Coiled-coil domain-containing protein 56        | R.FLDELEDEAK.A                                | 2 | 3.27 | 0.19 | -1.89 |
| IPI00022284 | Major prion protein precursor                   | A.AGAVVGGGLGGYM*LGSAM*SRPIIHFGSDYEDR.Y        | 3 | 3.71 | 0.37 | -4.31 |
| IPI00022284 | Major prion protein precursor                   | A.VVGGGLGGYM*LGSAM*SRPIIHFGSDYEDR.Y           | 3 | 4.59 | 0.46 | -3.19 |
| IPI00022284 | Major prion protein precursor                   | G.AAAAGAVVGGGLGGYM*LGSAM*SRPIIHFGSDYEDR.Y     | 3 | 4.99 | 0.46 | -2.76 |
| IPI00022284 | Major prion protein precursor                   | G.AVVGGGLGGYM*LGSAM*SRPIIHFGSDYEDR.Y          | 3 | 3.51 | 0.39 | -2.68 |
| IPI00022284 | Major prion protein precursor                   | G.GLGGYM*LGSAM*SRPIIHFGSDYEDR.Y               | 3 | 3.95 | 0.46 | -4.65 |
| IPI00022284 | Major prion protein precursor                   | H.M*AGAAAAGAVVGGGLGGYM*LGSAM*SRPIIHFGSDYEDR.Y | 3 | 5.61 | 0.50 | -2.85 |
| IPI00022284 | Major prion protein precursor                   | H.M*AGAAAAGAVVGGGLGGYM*LGSAM*SRPIIHFGSDYEDR.Y | 4 | 4.41 | 0.46 | -1.05 |
| IPI00022284 | Major prion protein precursor                   | K.GENFTETDVK.M                                | 1 | 2.36 | 0.23 | -3.68 |
| IPI00022284 | Major prion protein precursor                   | K.GENFTETDVK.M                                | 2 | 3.67 | 0.39 | -2.95 |
| IPI00022284 | Major prion protein precursor                   | K.HM*AGAAAAGAVVGGGLGGYM*LGSAM*SR.P            | 3 | 5.35 | 0.51 | -4.63 |
| IPI00022284 | Major prion protein precursor                   | K.QHTVTTTTKGENFTETDVK.M                       | 2 | 4.11 | 0.57 | -4.84 |
| IPI00022284 | Major prion protein precursor                   | K.QHTVTTTTKGENFTETDVK.M                       | 3 | 2.31 | 0.28 | -5.18 |
| IPI00022284 | Major prion protein precursor                   | K.QHTVTTTTKGENFTETDVK.M                       | 4 | 2.51 | 0.32 | -0.50 |
| IPI00022284 | Major prion protein precursor                   | M.SRPIIHFGSDYEDR.Y                            | 2 | 3.46 | 0.19 | -3.02 |
| IPI00022284 | Major prion protein precursor                   | N.TGGSRYPGQGSPGGNR.Y                          | 3 | 3.64 | 0.32 | -2.14 |
| IPI00022284 | Major prion protein precursor                   | R.ESQAYYQR.G                                  | 1 | 2.03 | 0.10 | -3.22 |
| IPI00022284 | Major prion protein precursor                   | R.ESQAYYQR.G                                  | 2 | 2.66 | 0.20 | -2.55 |
| IPI00022284 | Major prion protein precursor                   | R.PIIHFGSDYEDR.Y                              | 2 | 3.37 | 0.49 | -2.22 |
| IPI00022284 | Major prion protein precursor                   | R.PIIHFGSDYEDR.Y                              | 3 | 4.28 | 0.53 | -2.60 |
| IPI00022284 | Major prion protein precursor                   | R.PIIHFGSDYEDRYR.E                            | 2 | 3.88 | 0.41 | -4.50 |
| IPI00022284 | Major prion protein precursor                   | R.PIIHFGSDYEDRYR.E                            | 3 | 3.50 | 0.40 | -2.98 |
| IPI00022284 | Major prion protein precursor                   | R.VVEQM*CITQYER.E                             | 2 | 4.47 | 0.50 | -3.85 |
| IPI00022284 | Major prion protein precursor                   | R.VVEQM*CITQYER.E                             | 3 | 2.68 | 0.09 | -0.76 |
| IPI00022284 | Major prion protein precursor                   | R.VVEQMCITQYER.E                              | 2 | 1.99 | 0.12 | -1.80 |
| IPI00022284 | Major prion protein precursor                   | R.YPGQGSPGGNR.Y                               | 2 | 2.53 | 0.31 |       |
| IPI00022284 | Major prion protein precursor                   | R.YPNQVYYRPM*DEYSNQNNFVHDCVNITIK.Q            | 3 | 4.63 | 0.36 | -2.75 |
| IPI00022284 | Major prion protein precursor                   | R.YPNQVYYRPM*DEYSNQNNFVHDCVNITIK.Q            | 4 | 3.70 | 0.38 | -2.96 |
| IPI00022284 | Major prion protein precursor                   | S.RPIIHFGSDYEDR.Y                             | 3 | 4.07 | 0.31 | -2.44 |
| IPI00022295 | Platelet factor 4 variant precursor             | R.HITSLEVIK.A                                 | 2 | 1.89 | 0.14 | -1.80 |
| IPI00022296 | Mast/stem cell growth factor receptor precursor | K.AVPVVSVSK.A                                 | 1 | 2.03 | 0.34 | -2.68 |
| IPI00022296 | Mast/stem cell growth factor receptor precursor | K.DVSSSVYSTWK.R                               | 2 | 3.45 | 0.39 | -0.92 |
| IPI00022296 | Mast/stem cell growth factor receptor precursor | K.EDNDTLVR.C                                  | 1 | 1.79 | 0.10 |       |
| IPI00022296 | Mast/stem cell growth factor receptor precursor | K.LVVQSSIDSSAFK.H                             | 2 | 4.37 | 0.46 | -3.77 |
| IPI00022296 | Mast/stem cell growth factor receptor precursor | K.TSAYFNFAFK.G                                | 2 | 2.47 | 0.26 | -1.92 |
| IPI00022296 | Mast/stem cell growth factor receptor precursor | R.CPLTDPEVTNYSK.G                             | 2 | 3.51 | 0.34 | -3.45 |
| IPI00022296 | Mast/stem cell growth factor receptor precursor | R.LVNGM*LQCVAAAGFPEPTIDWYFCPGTEQR.C           | 3 | 4.20 | 0.41 | -3.11 |
| IPI00022296 | Mast/stem cell growth factor receptor precursor | R.QATLTISSAR.V                                | 1 | 1.85 | 0.20 | -2.47 |
| IPI00022296 | Mast/stem cell growth factor receptor precursor | R.QATLTISSAR.V                                | 2 | 2.98 | 0.36 | -2.26 |

|             |                                                       |                                  |   |      |      |       |
|-------------|-------------------------------------------------------|----------------------------------|---|------|------|-------|
| IPI00022314 | Superoxide dismutase [Mn], mitochondrial precursor    | K.AIWNVINWENVTER.Y               | 2 | 4.15 | 0.42 | -3.17 |
| IPI00022314 | Superoxide dismutase [Mn], mitochondrial precursor    | K.AIWNVINWENVTER.Y               | 3 | 5.02 | 0.44 | -2.93 |
| IPI00022331 | Phosphatidylcholine-sterol acyltransferase precursor  | K.LAGYLHTLVQNLVNNGYVRDETVR.A     | 3 | 2.73 | 0.08 | -4.38 |
| IPI00022331 | Phosphatidylcholine-sterol acyltransferase precursor  | K.LDKPDVVNWMCYR.K                | 2 | 2.33 | 0.13 |       |
| IPI00022331 | Phosphatidylcholine-sterol acyltransferase precursor  | K.TYSVEYLDSSK.L                  | 1 | 2.42 | 0.39 | -3.66 |
| IPI00022331 | Phosphatidylcholine-sterol acyltransferase precursor  | K.TYSVEYLDSSK.L                  | 2 | 2.34 | 0.22 | -3.66 |
| IPI00022331 | Phosphatidylcholine-sterol acyltransferase precursor  | R.DLLAGLPAPGVEVYCLYGVGLPTR.T     | 2 | 3.59 | 0.47 | -1.98 |
| IPI00022331 | Phosphatidylcholine-sterol acyltransferase precursor  | R.DLLAGLPAPGVEVYCLYGVGLPTR.T     | 3 | 2.62 | 0.16 | -1.62 |
| IPI00022331 | Phosphatidylcholine-sterol acyltransferase precursor  | R.ITTTSPWM*FPSR.M                | 2 | 3.29 | 0.38 | -1.77 |
| IPI00022331 | Phosphatidylcholine-sterol acyltransferase precursor  | R.LEPGQQEEYYR.K                  | 2 | 2.07 | 0.28 | -2.67 |
| IPI00022331 | Phosphatidylcholine-sterol acyltransferase precursor  | R.SSGLVSNAPGVQIR.V               | 1 | 2.46 | 0.24 | -1.71 |
| IPI00022331 | Phosphatidylcholine-sterol acyltransferase precursor  | R.SSGLVSNAPGVQIR.V               | 2 | 4.25 | 0.33 | -3.22 |
| IPI00022331 | Phosphatidylcholine-sterol acyltransferase precursor  | R.STELCGLWQGR.Q                  | 1 | 2.12 | 0.28 | -2.99 |
| IPI00022331 | Phosphatidylcholine-sterol acyltransferase precursor  | R.STELCGLWQGR.Q                  | 2 | 3.26 | 0.26 | -3.02 |
| IPI00022331 | Phosphatidylcholine-sterol acyltransferase precursor  | R.TYIYDHGFYPTDPVGVLYEDGDDTVATR.S | 2 | 4.67 | 0.63 | -3.30 |
| IPI00022331 | Phosphatidylcholine-sterol acyltransferase precursor  | R.TYIYDHGFYPTDPVGVLYEDGDDTVATR.S | 3 | 7.13 | 0.49 | -5.00 |
| IPI00022331 | Phosphatidylcholine-sterol acyltransferase precursor  | R.VPGFGK.T                       | 1 | 1.75 | 0.19 | -2.39 |
| IPI00022333 | Brain-specific angiogenesis inhibitor 1 precursor     | R.AGPPGPTDDFSVEYLVVGNR.N         | 2 | 5.47 | 0.53 | -4.17 |
| IPI00022333 | Brain-specific angiogenesis inhibitor 1 precursor     | R.DCGGGLQTR.T                    | 2 | 2.55 | 0.17 | -1.64 |
| IPI00022333 | Brain-specific angiogenesis inhibitor 1 precursor     | R.LCDPSAPLAFQASK.Q               | 2 | 3.64 | 0.24 | -1.90 |
| IPI00022333 | Brain-specific angiogenesis inhibitor 1 precursor     | R.TYLGVESFDEVLR.L                | 2 | 4.81 | 0.47 | -3.22 |
| IPI00022333 | Brain-specific angiogenesis inhibitor 1 precursor     | R.TYQFDSFLESTR.T                 | 2 | 3.84 | 0.48 | -5.07 |
| IPI00022337 | Interphotoreceptor retinoid-binding protein precursor | K.AAHIPENAK.D                    | 2 | 1.60 | 0.08 | -1.58 |

|             |                                                       |                                   |   |      |      |       |
|-------------|-------------------------------------------------------|-----------------------------------|---|------|------|-------|
| IPI00022337 | Interphotoreceptor retinoid-binding protein precursor | K.ALAILTLR.S                      | 2 | 2.79 | 0.11 | -2.13 |
| IPI00022337 | Interphotoreceptor retinoid-binding protein precursor | K.DRIPGIVPM*QIPSPEVFEELIK.F       | 3 | 2.81 | 0.06 | -1.70 |
| IPI00022337 | Interphotoreceptor retinoid-binding protein precursor | K.SHEILSISDPQTLASVLTAGVQSSLNDPR.L | 3 | 6.21 | 0.56 | -3.28 |
| IPI00022337 | Interphotoreceptor retinoid-binding protein precursor | K.TEVLPGQLGYLR.F                  | 2 | 2.86 | 0.36 | -2.19 |
| IPI00022337 | Interphotoreceptor retinoid-binding protein precursor | R.AKVPTVLQTAGK.L                  | 2 | 2.47 | 0.18 | -1.63 |
| IPI00022337 | Interphotoreceptor retinoid-binding protein precursor | R.FDSFADASVLGVLAPYVLR.Q           | 2 | 3.29 | 0.30 | -3.40 |
| IPI00022337 | Interphotoreceptor retinoid-binding protein precursor | R.FDSFADASVLGVLAPYVLR.Q           | 3 | 3.69 | 0.29 | -2.89 |
| IPI00022337 | Interphotoreceptor retinoid-binding protein precursor | R.FNIGGPTSSIPILCSYFFDEGPPVLLDK.I  | 3 | 2.69 | 0.15 | -1.72 |
| IPI00022337 | Interphotoreceptor retinoid-binding protein precursor | R.GVYLLTSHR.T                     | 2 | 2.18 | 0.21 | -1.40 |
| IPI00022337 | Interphotoreceptor retinoid-binding protein precursor | R.IGESDFFFTVPVSR.S                | 2 | 2.38 | 0.24 | -4.52 |
| IPI00022337 | Interphotoreceptor retinoid-binding protein precursor | R.SVGASDGSSWEGVGVTPHVVPAAEEALAR.A | 3 | 2.94 | 0.14 | -3.50 |
| IPI00022337 | Interphotoreceptor retinoid-binding protein precursor | R.TAVDLESLASQLTADLQEVSGDHR.L      | 2 | 4.42 | 0.51 | -5.26 |
| IPI00022337 | Interphotoreceptor retinoid-binding protein precursor | R.TAVDLESLASQLTADLQEVSGDHR.L      | 3 | 4.55 | 0.38 | -4.62 |
| IPI00022337 | Interphotoreceptor retinoid-binding protein precursor | R.TAVDLESLASQLTADLQEVSGDHR.L      | 4 | 3.52 | 0.18 | -2.95 |
| IPI00022337 | Interphotoreceptor retinoid-binding protein precursor | R.TGGGALDLR.K                     | 2 | 2.45 | 0.15 | -1.09 |
| IPI00022337 | Interphotoreceptor retinoid-binding protein precursor | R.VTSEVALAEILGADLQM*LSGDPHLK.A    | 3 | 3.60 | 0.36 | -5.04 |
| IPI00022361 | Band 3 anion transport protein                        | F.SGPLLVFEEAFFSFCETNGLEYIVGR.V    | 3 | 3.70 | 0.30 | -2.06 |
| IPI00022361 | Band 3 anion transport protein                        | K.GTVLLDLQETSLAGVAN.Q             | 2 | 3.06 | 0.27 | -3.24 |
| IPI00022361 | Band 3 anion transport protein                        | K.GTVLLDLQETSLAGVANQLLDR.F        | 2 | 6.19 | 0.57 | -4.63 |
| IPI00022361 | Band 3 anion transport protein                        | K.GTVLLDLQETSLAGVANQLLDR.F        | 3 | 5.39 | 0.48 | -4.92 |
| IPI00022361 | Band 3 anion transport protein                        | K.HSHAGELEALGGVKPAVLTR.S          | 4 | 3.48 | 0.34 | -0.57 |
| IPI00022361 | Band 3 anion transport protein                        | K.VYVELQELVM*DEK.N                | 2 | 4.67 | 0.37 | -4.32 |
| IPI00022361 | Band 3 anion transport protein                        | K.VYVELQELVMDEK.N                 | 2 | 4.68 | 0.39 | -3.62 |
| IPI00022361 | Band 3 anion transport protein                        | K.VYVELQELVMDEK.N                 | 3 | 3.28 | 0.16 | -2.77 |
| IPI00022361 | Band 3 anion transport protein                        | R.ADFLEQPVLGFVR.L                 | 2 | 2.18 | 0.18 | -4.08 |
| IPI00022361 | Band 3 anion transport protein                        | R.FLFVLLGPEAPHIDYTQLGR.A          | 2 | 4.84 | 0.54 | -4.91 |

|             |                                           |                                            |   |      |      |       |
|-------------|-------------------------------------------|--------------------------------------------|---|------|------|-------|
| IPI00022361 | Band 3 anion transport protein            | R.FLFVLLGPEAPHIDYTLQGR.A                   | 3 | 4.00 | 0.39 | -4.18 |
| IPI00022361 | Band 3 anion transport protein            | R.GELLHSLEGFLDCSLVLPPTDAPSEQALLSLVPVQR.E   | 3 | 4.37 | 0.36 | -5.38 |
| IPI00022361 | Band 3 anion transport protein            | R.LQEAAEELEAVELPVPIR.F                     | 3 | 3.56 | 0.19 | -3.04 |
| IPI00022361 | Band 3 anion transport protein            | R.LQEAAEELEAVELPVPIRFLFVLLGPEAPHIDYTLQGR.A | 4 | 2.73 | 0.15 | -2.34 |
| IPI00022361 | Band 3 anion transport protein            | R.PHLSHLTFWSLLELR.R                        | 2 | 4.32 | 0.28 | -1.85 |
| IPI00022361 | Band 3 anion transport protein            | R.PHLSHLTFWSLLELR.R                        | 3 | 5.00 | 0.41 | -3.88 |
| IPI00022361 | Band 3 anion transport protein            | R.WVQLEENLGENGAWGR.P                       | 2 | 5.29 | 0.51 | -5.95 |
| IPI00022367 | Isoform 2 of Astrotactin-1 precursor      | K.EVAAGQVLK.G                              | 2 | 2.06 | 0.14 | -3.39 |
| IPI00022367 | Isoform 2 of Astrotactin-1 precursor      | K.ITLHVPEHLIADGSR.F                        | 3 | 2.31 | 0.31 | -0.11 |
| IPI00022367 | Isoform 2 of Astrotactin-1 precursor      | K.ITLHVPEHLIADGSR.F                        | 4 | 2.93 | 0.31 | -1.97 |
| IPI00022367 | Isoform 2 of Astrotactin-1 precursor      | K.LNQVAISQALSINALHSLDGATSR.A               | 3 | 3.70 | 0.29 | -2.51 |
| IPI00022367 | Isoform 2 of Astrotactin-1 precursor      | K.SITVSALPFLR.E                            | 2 | 3.40 | 0.33 | -2.43 |
| IPI00022371 | Histidine-rich glycoprotein precursor     | A.VSPTDCSAVEPEAEK.A                        | 2 | 3.23 | 0.44 | -2.90 |
| IPI00022371 | Histidine-rich glycoprotein precursor     | K.DSPVLIDFFEDTER.Y                         | 2 | 4.86 | 0.52 | -4.38 |
| IPI00022371 | Histidine-rich glycoprotein precursor     | K.DSPVLIDFFEDTER.YR.K                      | 2 | 3.40 | 0.33 |       |
| IPI00022371 | Histidine-rich glycoprotein precursor     | K.DSPVLIDFFEDTER.YR.K                      | 3 | 1.55 | 0.14 | -3.29 |
| IPI00022371 | Histidine-rich glycoprotein precursor     | K.GEVLPLPEANFPSFPLPHHK.H                   | 2 | 2.65 | 0.34 | -3.37 |
| IPI00022371 | Histidine-rich glycoprotein precursor     | K.GEVLPLPEANFPSFPLPHHK.H                   | 4 | 3.42 | 0.39 | -3.25 |
| IPI00022371 | Histidine-rich glycoprotein precursor     | K.HPLKPDNQPFQSVSESCPGK.F                   | 3 | 4.51 | 0.32 |       |
| IPI00022371 | Histidine-rich glycoprotein precursor     | K.SGFPQVSM*FFTHTFPK.-                      | 2 | 4.27 | 0.41 | -4.14 |
| IPI00022371 | Histidine-rich glycoprotein precursor     | K.SGFPQVSM*FFTHTFPK.-                      | 3 | 1.58 | 0.17 | -3.68 |
| IPI00022371 | Histidine-rich glycoprotein precursor     | K.SGFPQVSMFFTHTFPK.-                       | 2 | 3.19 | 0.24 |       |
| IPI00022371 | Histidine-rich glycoprotein precursor     | K.YKEENDDFASFR.V                           | 2 | 4.24 | 0.44 | -2.42 |
| IPI00022371 | Histidine-rich glycoprotein precursor     | K.YKEENDDFASFR.V                           | 3 | 3.06 | 0.19 | -2.05 |
| IPI00022371 | Histidine-rich glycoprotein precursor     | R.ADLFYDVEALDLESPK.N                       | 2 | 5.30 | 0.44 | -6.33 |
| IPI00022371 | Histidine-rich glycoprotein precursor     | R.ADLFYDVEALDLESPK.N                       | 3 | 4.83 | 0.44 | -3.70 |
| IPI00022371 | Histidine-rich glycoprotein precursor     | R.DGYLFQLLR.I                              | 1 | 2.21 | 0.29 | -2.40 |
| IPI00022371 | Histidine-rich glycoprotein precursor     | R.DGYLFQLLR.I                              | 2 | 3.45 | 0.15 | -3.30 |
| IPI00022371 | Histidine-rich glycoprotein precursor     | R.GGEGTGYFVDFSVR.N                         | 2 | 4.41 | 0.50 | -3.01 |
| IPI00022371 | Histidine-rich glycoprotein precursor     | R.IADAHLDR.V                               | 2 | 2.33 | 0.16 | -3.40 |
| IPI00022371 | Histidine-rich glycoprotein precursor     | R.KGEVLPLPEANFPSFPLPHHK.H                  | 3 | 3.67 | 0.29 | -4.44 |
| IPI00022371 | Histidine-rich glycoprotein precursor     | R.KYWNDCEPPDSR.R                           | 2 | 3.48 | 0.33 |       |
| IPI00022371 | Histidine-rich glycoprotein precursor     | R.RDGYLFQLLR.I                             | 2 | 2.53 | 0.16 | -2.56 |
| IPI00022371 | Histidine-rich glycoprotein precursor     | R.RPSEIVIGQCK.V                            | 2 | 3.66 | 0.19 |       |
| IPI00022371 | Histidine-rich glycoprotein precursor     | R.RRDGYLFQLLR.I                            | 3 | 2.77 | 0.17 | -3.29 |
| IPI00022371 | Histidine-rich glycoprotein precursor     | R.VRGGEGTGYFVDFSVR.N                       | 2 | 2.27 | 0.16 | -3.77 |
| IPI00022371 | Histidine-rich glycoprotein precursor     | R.VRGGEGTGYFVDFSVR.N                       | 3 | 3.91 | 0.33 | -3.64 |
| IPI00022389 | Isoform 1 of C-reactive protein precursor | R.GYSIFSATK.R                              | 2 | 3.28 | 0.19 | -1.26 |
| IPI00022389 | Isoform 1 of C-reactive protein precursor | R.KAFVFPK.E                                | 2 | 1.72 | 0.08 | -5.01 |
| IPI00022391 | Serum amyloid P-component precursor       | K.IVLGQEQDSYGGKFDR.S                       | 2 | 4.34 | 0.47 | -2.25 |
| IPI00022391 | Serum amyloid P-component precursor       | K.IVLGQEQDSYGGKFDR.S                       | 3 | 2.07 | 0.15 | -1.34 |
| IPI00022391 | Serum amyloid P-component precursor       | R.AYSLFSYNTQGR.D                           | 2 | 3.65 | 0.43 | -2.04 |



|             |                                                 |                               |   |      |      |       |
|-------------|-------------------------------------------------|-------------------------------|---|------|------|-------|
| IPI00022391 | Serum amyloid P-component precursor             | R.DNELLVYK.E                  | 2 | 2.69 | 0.20 |       |
| IPI00022391 | Serum amyloid P-component precursor             | R.DNELLVYKER.V                | 2 | 2.88 | 0.27 | -1.92 |
| IPI00022391 | Serum amyloid P-component precursor             | R.GYVIKPLVWV.-                | 2 | 2.79 | 0.21 | -2.37 |
| IPI00022391 | Serum amyloid P-component precursor             | R.QGYFVEAQPK.I                | 2 | 2.85 | 0.24 | -1.19 |
| IPI00022391 | Serum amyloid P-component precursor             | R.VGEYSLYIGR.H                | 2 | 3.39 | 0.28 |       |
| IPI00022392 | Complement C1q subcomponent subunit A precursor | K.GHIYQGSEADSVFSGFLIFPSA.-    | 2 | 4.07 | 0.46 | -4.11 |
| IPI00022392 | Complement C1q subcomponent subunit A precursor | K.KGHIYQGSEADSVFSGFLIFPSA.-   | 2 | 3.86 | 0.50 | -5.89 |
| IPI00022392 | Complement C1q subcomponent subunit A precursor | K.KGHIYQGSEADSVFSGFLIFPSA.-   | 3 | 3.24 | 0.38 | -5.73 |
| IPI00022392 | Complement C1q subcomponent subunit A precursor | R.SLGFCDTNK.G                 | 2 | 2.28 | 0.26 | -1.24 |
| IPI00022394 | Complement C1q subcomponent subunit C precursor | K.FQSVFTVTR.Q                 | 2 | 3.00 | 0.18 | -1.27 |
| IPI00022394 | Complement C1q subcomponent subunit C precursor | K.TNQVNSGGVLLR.L              | 2 | 3.46 | 0.21 | -1.97 |
| IPI00022394 | Complement C1q subcomponent subunit C precursor | R.FNAVLTNPQGDYDTSTGK.F        | 2 | 5.45 | 0.53 | -3.49 |
| IPI00022395 | Complement component C9 precursor               | A.SSINDAPVLISQK.L             | 2 | 3.00 | 0.27 | -2.57 |
| IPI00022395 | Complement component C9 precursor               | D.RDGNTLTYR.R                 | 2 | 3.06 | 0.23 | -2.93 |
| IPI00022395 | Complement component C9 precursor               | I.EDYINEFSVRK.C               | 2 | 3.41 | 0.18 | -2.50 |
| IPI00022395 | Complement component C9 precursor               | K.ALPTTYEK.G                  | 1 | 1.90 | 0.26 | -3.16 |
| IPI00022395 | Complement component C9 precursor               | K.CLCACPFKFEGIACEISK.Q        | 3 | 3.47 | 0.22 | -7.59 |
| IPI00022395 | Complement component C9 precursor               | K.FEGIACEISK.Q                | 1 | 2.33 | 0.28 | -4.76 |
| IPI00022395 | Complement component C9 precursor               | K.FTPTETNKAEQCCEETASSISLHGK.G | 3 | 4.18 | 0.45 | -3.33 |
| IPI00022395 | Complement component C9 precursor               | K.ISEGLPALEFPNE.K             | 2 | 4.07 | 0.37 | -4.01 |
| IPI00022395 | Complement component C9 precursor               | K.LSPIYNLVPVK.M               | 2 | 3.28 | 0.33 | -4.29 |
| IPI00022395 | Complement component C9 precursor               | K.NFRTEHYEEQIEAFK.S           | 2 | 4.05 | 0.38 | -3.25 |
| IPI00022395 | Complement component C9 precursor               | K.NFRTEHYEEQIEAFK.S           | 3 | 3.01 | 0.24 | -4.40 |
| IPI00022395 | Complement component C9 precursor               | K.QKISEGLPALEFPNE.K           | 2 | 3.91 | 0.36 | -2.70 |
| IPI00022395 | Complement component C9 precursor               | K.TSNFNAAISLK.F               | 1 | 2.31 | 0.21 | -3.24 |
| IPI00022395 | Complement component C9 precursor               | K.TSNFNAAISLK.F               | 2 | 3.83 | 0.38 | -3.71 |
| IPI00022395 | Complement component C9 precursor               | K.YAFELKEK.L                  | 1 | 2.29 | 0.17 | -3.96 |
| IPI00022395 | Complement component C9 precursor               | P.WNVASLIYETK.G               | 2 | 3.22 | 0.28 | -2.77 |
| IPI00022395 | Complement component C9 precursor               | R.AIEDYINEFSVR.K              | 1 | 2.68 | 0.34 | -3.64 |
| IPI00022395 | Complement component C9 precursor               | R.AIEDYINEFSVR.K              | 2 | 4.61 | 0.46 | -3.63 |
| IPI00022395 | Complement component C9 precursor               | R.AIEDYINEFSVR.K              | 3 | 4.36 | 0.34 | -1.59 |
| IPI00022395 | Complement component C9 precursor               | R.AIEDYINEFSVRK.C             | 2 | 3.78 | 0.43 | -3.25 |
| IPI00022395 | Complement component C9 precursor               | R.AIEDYINEFSVRK.C             | 3 | 1.91 | 0.16 | -1.36 |
| IPI00022395 | Complement component C9 precursor               | R.CNGDNDCGDFSDEDDCESEPRPPCR.D | 3 | 5.42 | 0.67 | -3.92 |
| IPI00022395 | Complement component C9 precursor               | R.DGNTLTYR.R                  | 2 | 2.80 | 0.22 | -1.62 |

|             |                                             |                                   |   |      |      |       |
|-------------|---------------------------------------------|-----------------------------------|---|------|------|-------|
| IPI00022395 | Complement component C9 precursor           | R.DRDGNTLTYR.R                    | 2 | 3.01 | 0.17 | -3.97 |
| IPI00022395 | Complement component C9 precursor           | R.DRVVESELAR.T                    | 2 | 3.69 | 0.36 | -2.89 |
| IPI00022395 | Complement component C9 precursor           | R.DRVVESELAR.T                    | 3 | 3.38 | 0.10 | -2.72 |
| IPI00022395 | Complement component C9 precursor           | R.DVVLTTTFVDDIK.A                 | 2 | 4.79 | 0.44 | -4.93 |
| IPI00022395 | Complement component C9 precursor           | R.GTVIDVDFVNWASSINDAPVLISQK.L     | 2 | 5.51 | 0.61 | -3.84 |
| IPI00022395 | Complement component C9 precursor           | R.GTVIDVDFVNWASSINDAPVLISQK.L     | 3 | 5.75 | 0.60 | -5.77 |
| IPI00022395 | Complement component C9 precursor           | R.KGVELKDIKR.C                    | 2 | 3.00 | 0.12 | -3.71 |
| IPI00022395 | Complement component C9 precursor           | R.KYAFELK.E                       | 1 | 2.85 | 0.08 | -2.63 |
| IPI00022395 | Complement component C9 precursor           | R.KYAFELK.E                       | 2 | 2.58 | 0.07 | -1.60 |
| IPI00022395 | Complement component C9 precursor           | R.KYAFELKEK.L                     | 2 | 2.60 | 0.14 | -3.03 |
| IPI00022395 | Complement component C9 precursor           | R.NRDVVLTTTFVDDIK.A               | 2 | 4.45 | 0.41 | -5.21 |
| IPI00022395 | Complement component C9 precursor           | R.NRDVVLTTTFVDDIK.A               | 3 | 2.64 | 0.27 | -2.39 |
| IPI00022395 | Complement component C9 precursor           | R.RPWNVASLIYETK.G                 | 2 | 2.99 | 0.22 | -3.13 |
| IPI00022395 | Complement component C9 precursor           | R.RPWNVASLIYETK.G                 | 3 | 2.88 | 0.10 | -0.26 |
| IPI00022395 | Complement component C9 precursor           | R.SIEVFGQFNGK.R                   | 1 | 2.85 | 0.34 | -2.10 |
| IPI00022395 | Complement component C9 precursor           | R.SIEVFGQFNGK.R                   | 2 | 3.08 | 0.23 | -0.22 |
| IPI00022395 | Complement component C9 precursor           | R.SIEVFGQFNGKR.C                  | 2 | 2.96 | 0.32 | -4.01 |
| IPI00022395 | Complement component C9 precursor           | R.SIEVFGQFNGKR.C                  | 3 | 2.34 | 0.19 | -3.82 |
| IPI00022395 | Complement component C9 precursor           | R.TAGYGINILGM*DPLSTPFDNEFYGLCNR.D | 3 | 4.63 | 0.38 | -3.83 |
| IPI00022395 | Complement component C9 precursor           | R.TEYEEQIEAFK.S                   | 1 | 1.98 | 0.32 | -0.09 |
| IPI00022395 | Complement component C9 precursor           | R.TEYEEQIEAFK.S                   | 2 | 4.07 | 0.44 | -3.72 |
| IPI00022395 | Complement component C9 precursor           | R.TEYEEQIEAFK.S                   | 3 | 3.98 | 0.23 | -2.61 |
| IPI00022395 | Complement component C9 precursor           | R.TEYEEQIEAFKSIIQEK.T             | 3 | 3.98 | 0.35 | -3.82 |
| IPI00022395 | Complement component C9 precursor           | R.VVESELAR.T                      | 1 | 2.43 | 0.27 | -3.76 |
| IPI00022395 | Complement component C9 precursor           | R.VVESELAR.T                      | 2 | 3.06 | 0.24 | -2.76 |
| IPI00022395 | Complement component C9 precursor           | W.ASSINDAPVLISQK.L                | 2 | 4.05 | 0.34 | -3.01 |
| IPI00022395 | Complement component C9 precursor           | W.NVASLIYETK.G                    | 1 | 2.43 | 0.25 | -3.18 |
| IPI00022395 | Complement component C9 precursor           | W.NVASLIYETK.G                    | 2 | 3.10 | 0.27 | -2.81 |
| IPI00022417 | Leucine-rich alpha-2-glycoprotein precursor | K.ALGHLDLSGNR.L                   | 1 | 2.81 | 0.38 | -3.54 |
| IPI00022417 | Leucine-rich alpha-2-glycoprotein precursor | K.ALGHLDLSGNR.L                   | 2 | 3.05 | 0.37 | -2.87 |
| IPI00022417 | Leucine-rich alpha-2-glycoprotein precursor | K.DLLLPQPDLR.Y                    | 1 | 2.29 | 0.07 |       |
| IPI00022417 | Leucine-rich alpha-2-glycoprotein precursor | K.DLLLPQPDLR.Y                    | 2 | 2.79 | 0.23 | -3.87 |
| IPI00022417 | Leucine-rich alpha-2-glycoprotein precursor | K.ENQLEVLEVSWLHGLK.A              | 2 | 4.50 | 0.40 | -0.58 |
| IPI00022417 | Leucine-rich alpha-2-glycoprotein precursor | K.ENQLEVLEVSWLHGLK.A              | 3 | 2.76 | 0.21 | -0.75 |
| IPI00022417 | Leucine-rich alpha-2-glycoprotein precursor | K.GQTLAVAK.S                      | 2 | 2.77 | 0.23 | -1.89 |
| IPI00022417 | Leucine-rich alpha-2-glycoprotein precursor | K.LQELHLSSNGLESLSPEFLRPVPQLR.V    | 2 | 4.23 | 0.46 |       |
| IPI00022417 | Leucine-rich alpha-2-glycoprotein precursor | K.LQELHLSSNGLESLSPEFLRPVPQLR.V    | 3 | 5.16 | 0.51 | -3.07 |
| IPI00022417 | Leucine-rich alpha-2-glycoprotein precursor | K.LQELHLSSNGLESLSPEFLRPVPQLR.V    | 4 | 3.81 | 0.23 | -3.94 |
| IPI00022417 | Leucine-rich alpha-2-glycoprotein precursor | K.LQVLGKDLLLPQPDLR.Y              | 2 | 4.47 | 0.37 |       |
| IPI00022417 | Leucine-rich alpha-2-glycoprotein precursor | K.LQVLGKDLLLPQPDLR.Y              | 3 | 4.10 | 0.17 |       |
| IPI00022417 | Leucine-rich alpha-2-glycoprotein precursor | R.CAGPEAVKGQTLAVAK.S              | 2 | 4.97 | 0.31 |       |
| IPI00022417 | Leucine-rich alpha-2-glycoprotein precursor | R.CAGPEAVKGQTLAVAK.S              | 3 | 2.67 | 0.25 |       |

|             |                                             |                                    |   |      |      |       |
|-------------|---------------------------------------------|------------------------------------|---|------|------|-------|
| IPI00022417 | Leucine-rich alpha-2-glycoprotein precursor | R.DGFDISGNPWICDQNLSDLYR.W          | 2 | 5.26 | 0.44 |       |
| IPI00022417 | Leucine-rich alpha-2-glycoprotein precursor | R.DGFDISGNPWICDQNLSDLYR.W          | 3 | 4.17 | 0.27 |       |
| IPI00022417 | Leucine-rich alpha-2-glycoprotein precursor | R.LHLEGNK.L                        | 1 | 2.42 | 0.11 | -2.95 |
| IPI00022417 | Leucine-rich alpha-2-glycoprotein precursor | R.LHLEGNKQLVLGK.D                  | 2 | 3.26 | 0.37 | -4.21 |
| IPI00022417 | Leucine-rich alpha-2-glycoprotein precursor | R.LHLEGNKQLVLGK.D                  | 3 | 2.73 | 0.23 |       |
| IPI00022417 | Leucine-rich alpha-2-glycoprotein precursor | R.LHLEGNKQLVLGKDLLLPQDLR.Y         | 3 | 5.33 | 0.40 |       |
| IPI00022417 | Leucine-rich alpha-2-glycoprotein precursor | R.NALTGLPPGLFQASATLDTLVLK.E        | 2 | 3.72 | 0.47 | -5.13 |
| IPI00022417 | Leucine-rich alpha-2-glycoprotein precursor | R.NALTGLPPGLFQASATLDTLVLK.E        | 3 | 4.98 | 0.53 | -4.25 |
| IPI00022417 | Leucine-rich alpha-2-glycoprotein precursor | R.TLDLGENQLETLPDLLR.G              | 2 | 4.93 | 0.44 | -5.65 |
| IPI00022417 | Leucine-rich alpha-2-glycoprotein precursor | R.TLDLGENQLETLPDLLR.G              | 3 | 3.07 | 0.27 | -3.98 |
| IPI00022417 | Leucine-rich alpha-2-glycoprotein precursor | R.TLDLGENQLETLPDLLRGLQLER.L        | 3 | 4.49 | 0.39 |       |
| IPI00022417 | Leucine-rich alpha-2-glycoprotein precursor | R.VAAGAFQGLR.Q                     | 1 | 2.02 | 0.13 | -0.93 |
| IPI00022417 | Leucine-rich alpha-2-glycoprotein precursor | R.VAAGAFQGLR.Q                     | 2 | 3.88 | 0.34 | -1.36 |
| IPI00022417 | Leucine-rich alpha-2-glycoprotein precursor | R.WLQAQKDK.M                       | 2 | 2.79 | 0.06 |       |
| IPI00022417 | Leucine-rich alpha-2-glycoprotein precursor | R.YLFLNGNK.L                       | 2 | 2.43 | 0.17 | -1.60 |
| IPI00022420 | Plasma retinol-binding protein precursor    | D.PNGLPPEAQK.I                     | 2 | 3.02 | 0.23 | -1.93 |
| IPI00022420 | Plasma retinol-binding protein precursor    | F.SVDETGQM*SATAK.G                 | 2 | 4.27 | 0.49 | -1.84 |
| IPI00022420 | Plasma retinol-binding protein precursor    | K.GNDDHWIVDTDYDTYAVQYSCR.L         | 2 | 4.43 | 0.33 |       |
| IPI00022420 | Plasma retinol-binding protein precursor    | K.GNDDHWIVDTDYDTYAVQYSCR.L         | 3 | 4.69 | 0.58 | -5.04 |
| IPI00022420 | Plasma retinol-binding protein precursor    | K.KDPEGLFLQDNIVAEFSVDETGQM*SATAK.G | 3 | 6.60 | 0.53 | -7.06 |
| IPI00022420 | Plasma retinol-binding protein precursor    | K.M*KYWGVASFLQK.G                  | 2 | 3.19 | 0.31 | -4.04 |
| IPI00022420 | Plasma retinol-binding protein precursor    | K.M*KYWGVASFLQK.G                  | 3 | 2.92 | 0.11 | -1.05 |
| IPI00022420 | Plasma retinol-binding protein precursor    | K.YWGVASFLQK.G                     | 1 | 3.00 | 0.18 | -1.99 |
| IPI00022420 | Plasma retinol-binding protein precursor    | K.YWGVASFLQK.G                     | 2 | 3.40 | 0.27 | -2.48 |
| IPI00022420 | Plasma retinol-binding protein precursor    | R.DPNGLPPEAQK.I                    | 1 | 2.28 | 0.35 | -3.98 |
| IPI00022420 | Plasma retinol-binding protein precursor    | R.DPNGLPPEAQK.I                    | 2 | 3.87 | 0.41 | -5.44 |
| IPI00022420 | Plasma retinol-binding protein precursor    | R.FSGTWYAM*AK.K                    | 1 | 2.15 | 0.37 | -3.26 |
| IPI00022420 | Plasma retinol-binding protein precursor    | R.FSGTWYAM*AK.K                    | 2 | 3.50 | 0.42 | -3.15 |
| IPI00022420 | Plasma retinol-binding protein precursor    | R.LIVHNGYCDGR.S                    | 2 | 2.69 | 0.39 | -3.70 |
| IPI00022420 | Plasma retinol-binding protein precursor    | R.LIVHNGYCDGR.S                    | 3 | 2.14 | 0.10 | -4.31 |
| IPI00022420 | Plasma retinol-binding protein precursor    | R.LLNLDGTCADSYSFVFSR.D             | 2 | 5.92 | 0.63 | -8.74 |
| IPI00022420 | Plasma retinol-binding protein precursor    | R.LLNLDGTCADSYSFVFSR.D             | 3 | 4.75 | 0.51 | -5.11 |
| IPI00022420 | Plasma retinol-binding protein precursor    | R.LLNLDGTCADSYSFVFSRDPNGLPPEAQK.I  | 3 | 5.23 | 0.48 | -4.79 |
| IPI00022420 | Plasma retinol-binding protein precursor    | R.LLNLDGTCADSYSFVFSRDPNGLPPEAQK.I  | 4 | 3.31 | 0.26 | -3.07 |
| IPI00022420 | Plasma retinol-binding protein precursor    | R.LLNWDVCCADM*VGTFTDTEPAKFK.M      | 3 | 4.29 | 0.54 | -4.46 |
| IPI00022420 | Plasma retinol-binding protein precursor    | R.QEELCLAR.Q                       | 2 | 1.84 | 0.13 | -2.94 |
| IPI00022420 | Plasma retinol-binding protein precursor    | R.VKENFDK.A                        | 1 | 2.41 | 0.08 | -2.55 |
| IPI00022420 | Plasma retinol-binding protein precursor    | R.VKENFDKAR.F                      | 1 | 2.90 | 0.11 | -4.25 |
| IPI00022420 | Plasma retinol-binding protein precursor    | R.VKENFDKAR.F                      | 2 | 3.40 | 0.17 | -2.51 |
| IPI00022420 | Plasma retinol-binding protein precursor    | W.DVCCADM*VGTFTDTEPAK.F            | 2 | 5.19 | 0.57 | -2.81 |
| IPI00022426 | AMBIP protein precursor                     | K.CVLFPPYGGCQGNK.F                 | 2 | 3.51 | 0.26 | -3.04 |
| IPI00022426 | AMBIP protein precursor                     | K.EDSCLGYSAGPCM*GM*TSR.Y           | 2 | 4.94 | 0.62 | -3.85 |

|             |                                       |                                        |   |      |      |       |
|-------------|---------------------------------------|----------------------------------------|---|------|------|-------|
| IPI00022426 | AMBP protein precursor                | K.EDSCQLGYSAGPCM*GM*TSR.Y              | 3 | 3.01 | 0.35 | -4.20 |
| IPI00022426 | AMBP protein precursor                | K.FYSEKECR.E                           | 2 | 1.88 | 0.19 | -2.76 |
| IPI00022426 | AMBP protein precursor                | K.GVCEETSGAYEKTDTDGK.F                 | 2 | 5.17 | 0.46 |       |
| IPI00022426 | AMBP protein precursor                | K.GVCEETSGAYEKTDTDGK.F                 | 3 | 2.49 | 0.32 | -1.16 |
| IPI00022426 | AMBP protein precursor                | K.KEDSCQLGYSAGPCM*GM*TSR.Y             | 3 | 4.57 | 0.31 |       |
| IPI00022426 | AMBP protein precursor                | K.TDTDGKFLYHK.S                        | 2 | 3.12 | 0.42 | -3.11 |
| IPI00022426 | AMBP protein precursor                | K.WYNLAIGSTCPWLK.K                     | 2 | 3.40 | 0.35 |       |
| IPI00022426 | AMBP protein precursor                | K.WYNLAIGSTCPWLK.K.I                   | 2 | 2.97 | 0.14 |       |
| IPI00022426 | AMBP protein precursor                | R.AFIQLWAFDAVK.G                       | 1 | 3.08 | 0.20 | -2.71 |
| IPI00022426 | AMBP protein precursor                | R.AFIQLWAFDAVK.G                       | 2 | 5.07 | 0.35 | -8.77 |
| IPI00022426 | AMBP protein precursor                | R.AFIQLWAFDAVK.G                       | 3 | 3.99 | 0.27 | -2.42 |
| IPI00022426 | AMBP protein precursor                | R.ETLLQDFR.V                           | 1 | 2.13 | 0.18 | -0.22 |
| IPI00022426 | AMBP protein precursor                | R.ETLLQDFR.V                           | 2 | 2.71 | 0.15 | -1.22 |
| IPI00022426 | AMBP protein precursor                | R.EYCGVPGDGDELLR.F                     | 2 | 3.31 | 0.51 | -4.62 |
| IPI00022426 | AMBP protein precursor                | R.GECVPGEQEPELIPR.V                    | 2 | 3.64 | 0.36 |       |
| IPI00022426 | AMBP protein precursor                | R.KGVCEETSGAYEK.T                      | 2 | 3.79 | 0.30 |       |
| IPI00022426 | AMBP protein precursor                | R.KGVCEETSGAYEKTDTDGK.F                | 3 | 4.44 | 0.27 |       |
| IPI00022426 | AMBP protein precursor                | R.M*TVSTLVLGEGATEAEISM*TSTR.W          | 2 | 5.70 | 0.58 | -5.20 |
| IPI00022426 | AMBP protein precursor                | R.M*TVSTLVLGEGATEAEISM*TSTR.W          | 3 | 4.32 | 0.48 | -3.40 |
| IPI00022426 | AMBP protein precursor                | R.TVAACNLPIVR.G                        | 1 | 2.92 | 0.24 | -2.01 |
| IPI00022426 | AMBP protein precursor                | R.TVAACNLPIVR.G                        | 2 | 4.38 | 0.28 | -3.20 |
| IPI00022426 | AMBP protein precursor                | R.VVAQGVGIPEDSIFTM*ADR.G               | 2 | 4.66 | 0.43 |       |
| IPI00022426 | AMBP protein precursor                | R.VVAQGVGIPEDSIFTM*ADR.G               | 3 | 4.87 | 0.40 | -3.70 |
| IPI00022426 | AMBP protein precursor                | R.VVAQGVGIPEDSIFTM*ADRGEVPGEQEPELIPR.V | 3 | 4.83 | 0.36 | -2.86 |
| IPI00022426 | AMBP protein precursor                | R.VVAQGVGIPEDSIFTM*ADRGEVPGEQEPELIPR.V | 4 | 4.15 | 0.45 | -3.54 |
| IPI00022426 | AMBP protein precursor                | R.VVAQGVGIPEDSIFTMADRGEVPGEQEPELIPR.V  | 3 | 5.14 | 0.41 |       |
| IPI00022429 | Alpha-1-acid glycoprotein 1 precursor | K.EQLGEFYEALDCLR.I                     | 1 | 2.42 | 0.20 |       |
| IPI00022429 | Alpha-1-acid glycoprotein 1 precursor | K.EQLGEFYEALDCLR.I                     | 2 | 4.28 | 0.45 |       |
| IPI00022429 | Alpha-1-acid glycoprotein 1 precursor | K.EQLGEFYEALDCLR.I                     | 3 | 5.31 | 0.31 |       |
| IPI00022429 | Alpha-1-acid glycoprotein 1 precursor | K.EQLGEFYEALDCLRIPK.S                  | 2 | 4.57 | 0.43 |       |
| IPI00022429 | Alpha-1-acid glycoprotein 1 precursor | K.NWGLSVYADKPETTKEQLGEFYEALDCLR.I      | 2 | 4.33 | 0.45 |       |
| IPI00022429 | Alpha-1-acid glycoprotein 1 precursor | K.NWGLSVYADKPETTKEQLGEFYEALDCLR.I      | 3 | 6.50 | 0.49 |       |
| IPI00022429 | Alpha-1-acid glycoprotein 1 precursor | K.SDVVYTDWK.K                          | 1 | 2.96 | 0.30 |       |
| IPI00022429 | Alpha-1-acid glycoprotein 1 precursor | K.SDVVYTDWK.K                          | 2 | 3.48 | 0.38 |       |
| IPI00022429 | Alpha-1-acid glycoprotein 1 precursor | K.SDVVYTDWKK.D                         | 1 | 2.79 | 0.31 |       |
| IPI00022429 | Alpha-1-acid glycoprotein 1 precursor | K.SDVVYTDWKK.D                         | 2 | 3.18 | 0.39 |       |
| IPI00022429 | Alpha-1-acid glycoprotein 1 precursor | K.SDVVYTDWKK.D                         | 3 | 2.33 | 0.20 |       |
| IPI00022429 | Alpha-1-acid glycoprotein 1 precursor | K.SVQEIQATFFYFTPNKTEDTIFLR.E           | 3 | 2.94 | 0.14 |       |
| IPI00022429 | Alpha-1-acid glycoprotein 1 precursor | K.TEDTIFLR.E                           | 1 | 1.64 | 0.11 |       |
| IPI00022429 | Alpha-1-acid glycoprotein 1 precursor | K.TYM*LAFDVNDEK.N                      | 2 | 4.47 | 0.43 |       |
| IPI00022429 | Alpha-1-acid glycoprotein 1 precursor | K.TYM*LAFDVNDEKNWGLSVYADKPETTK.E       | 2 | 4.53 | 0.44 |       |
| IPI00022429 | Alpha-1-acid glycoprotein 1 precursor | K.TYM*LAFDVNDEKNWGLSVYADKPETTK.E       | 3 | 5.61 | 0.47 |       |

|             |                                       |                                              |   |      |      |       |
|-------------|---------------------------------------|----------------------------------------------|---|------|------|-------|
| IPI00022429 | Alpha-1-acid glycoprotein 1 precursor | K.TYMLAFDVNDEK.N                             | 2 | 3.85 | 0.37 |       |
| IPI00022429 | Alpha-1-acid glycoprotein 1 precursor | K.TYMLAFDVNDEKNWGLSVYADKPETTK.E              | 3 | 5.32 | 0.41 |       |
| IPI00022429 | Alpha-1-acid glycoprotein 1 precursor | K.WFYIASAFR.N                                | 1 | 2.66 | 0.25 |       |
| IPI00022429 | Alpha-1-acid glycoprotein 1 precursor | K.WFYIASAFR.N                                | 2 | 2.37 | 0.31 | -1.54 |
| IPI00022429 | Alpha-1-acid glycoprotein 1 precursor | K.WFYIASAFRNEEYNK.S                          | 2 | 4.39 | 0.40 |       |
| IPI00022429 | Alpha-1-acid glycoprotein 1 precursor | R.IPKSDVVYTDWK.K                             | 2 | 2.39 | 0.19 |       |
| IPI00022429 | Alpha-1-acid glycoprotein 1 precursor | R.IPKSDVVYTDWK.K                             | 3 | 3.39 | 0.17 |       |
| IPI00022429 | Alpha-1-acid glycoprotein 1 precursor | R.IPKSDVVYTDWKK.D                            | 2 | 3.40 | 0.31 |       |
| IPI00022429 | Alpha-1-acid glycoprotein 1 precursor | R.YVGGQEHFHALLILR.D                          | 2 | 4.36 | 0.35 | -4.17 |
| IPI00022429 | Alpha-1-acid glycoprotein 1 precursor | R.YVGGQEHFHALLILR.D                          | 3 | 3.24 | 0.43 |       |
| IPI00022431 | Alpha-2-HS-glycoprotein precursor     | K.CDSSPDSAEDVRK.V                            | 2 | 3.29 | 0.21 |       |
| IPI00022431 | Alpha-2-HS-glycoprotein precursor     | K.CDSSPDSAEDVRK.V                            | 3 | 3.19 | 0.32 |       |
| IPI00022431 | Alpha-2-HS-glycoprotein precursor     | K.CNLLAEKQYGFCK.A                            | 2 | 3.84 | 0.28 |       |
| IPI00022431 | Alpha-2-HS-glycoprotein precursor     | K.EATEAAKCNLLAEK.Q                           | 2 | 4.40 | 0.30 |       |
| IPI00022431 | Alpha-2-HS-glycoprotein precursor     | K.EHAVEGDCDFQLLK.L                           | 1 | 3.18 | 0.37 |       |
| IPI00022431 | Alpha-2-HS-glycoprotein precursor     | K.EHAVEGDCDFQLLK.L                           | 2 | 3.91 | 0.49 |       |
| IPI00022431 | Alpha-2-HS-glycoprotein precursor     | K.EHAVEGDCDFQLLK.L                           | 3 | 4.78 | 0.15 |       |
| IPI00022431 | Alpha-2-HS-glycoprotein precursor     | K.EHAVEGDCDFQLLKLDGK.F                       | 2 | 5.14 | 0.49 |       |
| IPI00022431 | Alpha-2-HS-glycoprotein precursor     | K.EHAVEGDCDFQLLKLDGK.F                       | 3 | 3.33 | 0.35 |       |
| IPI00022431 | Alpha-2-HS-glycoprotein precursor     | K.HTLNQIDEVK.V                               | 1 | 2.29 | 0.22 |       |
| IPI00022431 | Alpha-2-HS-glycoprotein precursor     | K.HTLNQIDEVK.V                               | 2 | 3.37 | 0.36 | -2.95 |
| IPI00022431 | Alpha-2-HS-glycoprotein precursor     | K.LDGKFSVVYAK.C                              | 1 | 2.68 | 0.27 |       |
| IPI00022431 | Alpha-2-HS-glycoprotein precursor     | K.LDGKFSVVYAK.C                              | 2 | 3.26 | 0.31 |       |
| IPI00022431 | Alpha-2-HS-glycoprotein precursor     | K.LDGKFSVVYAK.C                              | 3 | 2.22 | 0.27 | -3.33 |
| IPI00022431 | Alpha-2-HS-glycoprotein precursor     | R.AHYDLR.H                                   | 1 | 1.52 | 0.12 |       |
| IPI00022431 | Alpha-2-HS-glycoprotein precursor     | R.AQLVPLPPSTYVEFTVSGTDCVAK.E                 | 2 | 4.23 | 0.36 |       |
| IPI00022431 | Alpha-2-HS-glycoprotein precursor     | R.AQLVPLPPSTYVEFTVSGTDCVAK.E                 | 3 | 5.43 | 0.41 |       |
| IPI00022431 | Alpha-2-HS-glycoprotein precursor     | R.HTFM*GVVSLGSPSGEVSHPR.K                    | 2 | 4.19 | 0.50 | -4.26 |
| IPI00022431 | Alpha-2-HS-glycoprotein precursor     | R.HTFM*GVVSLGSPSGEVSHPR.K                    | 3 | 4.55 | 0.50 | -3.15 |
| IPI00022431 | Alpha-2-HS-glycoprotein precursor     | R.HTFMGVVSLGSPSGEVSHPR.K                     | 2 | 6.29 | 0.55 |       |
| IPI00022431 | Alpha-2-HS-glycoprotein precursor     | R.HTFMGVVSLGSPSGEVSHPR.K                     | 3 | 5.67 | 0.41 |       |
| IPI00022431 | Alpha-2-HS-glycoprotein precursor     | R.QLKEHAVEGDCDFQLLK.L                        | 2 | 3.43 | 0.35 |       |
| IPI00022431 | Alpha-2-HS-glycoprotein precursor     | R.QLKEHAVEGDCDFQLLK.L                        | 3 | 3.55 | 0.28 |       |
| IPI00022431 | Alpha-2-HS-glycoprotein precursor     | R.QLKEHAVEGDCDFQLLKLDGK.F                    | 2 | 3.39 | 0.28 |       |
| IPI00022431 | Alpha-2-HS-glycoprotein precursor     | R.QPNCDDPETEEAALVAIDYINQNLPGWGYK.H           | 2 | 3.84 | 0.32 |       |
| IPI00022431 | Alpha-2-HS-glycoprotein precursor     | R.QPNCDDPETEEAALVAIDYINQNLPGWGYK.H           | 3 | 5.07 | 0.40 |       |
| IPI00022431 | Alpha-2-HS-glycoprotein precursor     | R.TVVQPSVGAAGPVVPPCPGR.I                     | 2 | 4.79 | 0.44 | -4.36 |
| IPI00022431 | Alpha-2-HS-glycoprotein precursor     | R.TVVQPSVGAAGPVVPPCPGR.I                     | 3 | 5.56 | 0.47 | -4.23 |
| IPI00022431 | Alpha-2-HS-glycoprotein precursor     | S.APHGPGLIYR.Q                               | 1 | 2.17 | 0.34 | -4.51 |
| IPI00022431 | Alpha-2-HS-glycoprotein precursor     | S.APHGPGLIYRQPNCDDPETEEAALVAIDYINQNLPGWGYK.H | 3 | 5.78 | 0.41 |       |
| IPI00022432 | Transthyretin precursor               | A.GPTGTGESKCPLM*VK.V                         | 2 | 3.90 | 0.52 | -3.04 |
| IPI00022432 | Transthyretin precursor               | A.LGISPFHEHAEVFTANDSGPR.R                    | 3 | 3.78 | 0.38 | -5.70 |

|             |                        |                                  |   |      |      |       |
|-------------|------------------------|----------------------------------|---|------|------|-------|
| IPI00022432 | Tranthyretin precursor | A.LGISPFHEHAEVVFTANDSGPRR.Y      | 3 | 3.75 | 0.41 | -5.79 |
| IPI00022432 | Tranthyretin precursor | G.SPAINVAVHVFR.K                 | 3 | 3.53 | 0.34 | -3.56 |
| IPI00022432 | Tranthyretin precursor | G.SPAINVAVHVFRK.A                | 2 | 3.00 | 0.44 | -4.06 |
| IPI00022432 | Tranthyretin precursor | I.NVAVHVFR.K                     | 1 | 2.12 | 0.23 | -1.87 |
| IPI00022432 | Tranthyretin precursor | I.SPFHEHAEVVFTANDSGPRR.Y         | 3 | 3.53 | 0.38 | -3.79 |
| IPI00022432 | Tranthyretin precursor | K.AADDTWEPFASGK.T                | 1 | 2.72 | 0.42 | -2.54 |
| IPI00022432 | Tranthyretin precursor | K.AADDTWEPFASGK.T                | 2 | 4.67 | 0.40 | -4.24 |
| IPI00022432 | Tranthyretin precursor | K.ALGISPFHEHAEVVFTANDSGPR.R      | 2 | 6.28 | 0.64 | -7.29 |
| IPI00022432 | Tranthyretin precursor | K.ALGISPFHEHAEVVFTANDSGPR.R      | 3 | 6.43 | 0.51 | -8.80 |
| IPI00022432 | Tranthyretin precursor | K.ALGISPFHEHAEVVFTANDSGPR.R      | 4 | 4.57 | 0.45 | -5.79 |
| IPI00022432 | Tranthyretin precursor | K.ALGISPFHEHAEVVFTANDSGPRR.Y     | 2 | 4.14 | 0.50 | -7.01 |
| IPI00022432 | Tranthyretin precursor | K.ALGISPFHEHAEVVFTANDSGPRR.Y     | 3 | 3.77 | 0.46 | -7.71 |
| IPI00022432 | Tranthyretin precursor | K.ALGISPFHEHAEVVFTANDSGPRR.Y     | 4 | 3.12 | 0.44 | -6.57 |
| IPI00022432 | Tranthyretin precursor | K.ALGISPFHEHAEVVFTANDSGPRR.Y     | 5 | 2.79 | 0.41 | -3.32 |
| IPI00022432 | Tranthyretin precursor | K.TSESGELHGLTTEEEFVEGIYK.V       | 2 | 5.39 | 0.59 | -4.06 |
| IPI00022432 | Tranthyretin precursor | K.TSESGELHGLTTEEEFVEGIYK.V       | 3 | 6.55 | 0.55 | -4.91 |
| IPI00022432 | Tranthyretin precursor | K.TSESGELHGLTTEEEFVEGIYKVEIDTK.S | 2 | 5.07 | 0.62 | -5.36 |
| IPI00022432 | Tranthyretin precursor | K.TSESGELHGLTTEEEFVEGIYKVEIDTK.S | 3 | 6.80 | 0.58 | -6.45 |
| IPI00022432 | Tranthyretin precursor | K.TSESGELHGLTTEEEFVEGIYKVEIDTK.S | 4 | 5.82 | 0.54 | -5.79 |
| IPI00022432 | Tranthyretin precursor | K.TSESGELHGLTTEEEFVEGIYKVEIDTK.S | 5 | 3.13 | 0.06 | -4.21 |
| IPI00022432 | Tranthyretin precursor | K.VLDAVRGSPAINVAVHVFR.K          | 2 | 4.01 | 0.50 | -2.90 |
| IPI00022432 | Tranthyretin precursor | K.VLDAVRGSPAINVAVHVFR.K          | 3 | 6.32 | 0.53 | -4.44 |
| IPI00022432 | Tranthyretin precursor | K.VLDAVRGSPAINVAVHVFR.K          | 4 | 2.65 | 0.18 | -3.13 |
| IPI00022432 | Tranthyretin precursor | K.VLDAVRGSPAINVAVHVFRK.A         | 3 | 3.38 | 0.32 | -4.03 |
| IPI00022432 | Tranthyretin precursor | K.VLDAVRGSPAINVAVHVFRK.A         | 5 | 2.85 | 0.20 | -4.02 |
| IPI00022432 | Tranthyretin precursor | L.GISPFHEHAEVVFTANDSGPR.R        | 3 | 4.01 | 0.42 | -4.76 |
| IPI00022432 | Tranthyretin precursor | R.GSPAINVAVHVFR.K                | 1 | 2.95 | 0.42 | -4.93 |
| IPI00022432 | Tranthyretin precursor | R.GSPAINVAVHVFR.K                | 2 | 4.64 | 0.54 | -8.52 |
| IPI00022432 | Tranthyretin precursor | R.GSPAINVAVHVFR.K                | 3 | 2.19 | 0.40 | -4.77 |
| IPI00022432 | Tranthyretin precursor | R.GSPAINVAVHVFRK.A               | 2 | 4.59 | 0.51 | -5.11 |
| IPI00022432 | Tranthyretin precursor | R.GSPAINVAVHVFRK.A               | 3 | 1.88 | 0.37 | -3.51 |
| IPI00022432 | Tranthyretin precursor | R.KAADDTWEPFASGK.T               | 1 | 3.66 | 0.33 |       |
| IPI00022432 | Tranthyretin precursor | R.KAADDTWEPFASGK.T               | 2 | 4.81 | 0.58 | -3.77 |
| IPI00022432 | Tranthyretin precursor | R.KAADDTWEPFASGK.T               | 3 | 2.75 | 0.11 | -1.73 |
| IPI00022432 | Tranthyretin precursor | R.RYTIAALLSPYSY.S                | 2 | 3.69 | 0.45 | -4.38 |
| IPI00022432 | Tranthyretin precursor | R.RYTIAALLSPYSYSTTAVVTNPK.E      | 2 | 5.70 | 0.61 | -4.58 |
| IPI00022432 | Tranthyretin precursor | R.RYTIAALLSPYSYSTTAVVTNPK.E      | 3 | 4.50 | 0.49 | -4.66 |
| IPI00022432 | Tranthyretin precursor | R.RYTIAALLSPYSYSTTAVVTNPK.E.-    | 2 | 6.82 | 0.61 | -6.04 |
| IPI00022432 | Tranthyretin precursor | R.RYTIAALLSPYSYSTTAVVTNPK.E.-    | 3 | 5.41 | 0.53 | -6.61 |
| IPI00022432 | Tranthyretin precursor | R.RYTIAALLSPYSYSTTAVVTNPK.E.-    | 4 | 4.35 | 0.40 | -4.87 |
| IPI00022432 | Tranthyretin precursor | R.YTIAALLSPYS.Y                  | 1 | 2.28 | 0.24 | -2.62 |
| IPI00022432 | Tranthyretin precursor | R.YTIAALLSPYSYSTTAVVTNPK.E       | 2 | 5.32 | 0.58 | -4.46 |

|             |                             |                                       |   |      |      |       |
|-------------|-----------------------------|---------------------------------------|---|------|------|-------|
| IPI00022432 | Transthyretin precursor     | R.YTIAALLSPYSYSTTAVVTNPK.E            | 3 | 4.70 | 0.43 | -3.76 |
| IPI00022432 | Transthyretin precursor     | R.YTIAALLSPYSYSTTAVVTNPK.E.-          | 2 | 6.85 | 0.61 | -7.96 |
| IPI00022432 | Transthyretin precursor     | R.YTIAALLSPYSYSTTAVVTNPK.E.-          | 3 | 5.22 | 0.42 | -6.26 |
| IPI00022432 | Transthyretin precursor     | S.ESGELHGLTTEEEFVEGIYKVEIDTK.S        | 3 | 5.02 | 0.40 | -3.82 |
| IPI00022432 | Transthyretin precursor     | S.PAINVAVHVFR.K                       | 2 | 3.76 | 0.46 | -2.67 |
| IPI00022432 | Transthyretin precursor     | S.PAINVAVHVFR.K                       | 3 | 4.89 | 0.50 | -4.35 |
| IPI00022432 | Transthyretin precursor     | S.PAINVAVHVFRK.A                      | 2 | 3.45 | 0.44 | -3.54 |
| IPI00022432 | Transthyretin precursor     | S.YSTTAVVTNPK.E                       | 1 | 2.00 | 0.21 | -4.25 |
| IPI00022432 | Transthyretin precursor     | T.SESGELHGLTTEEEFVEGIYKVEIDTK.S       | 3 | 4.19 | 0.47 | -4.85 |
| IPI00022432 | Transthyretin precursor     | T.WEPFASGK.T                          | 1 | 2.02 | 0.32 | -2.86 |
| IPI00022434 | Uncharacterized protein ALB | A.DLPSLAADFVESKDVCK.N                 | 1 | 3.67 | 0.21 |       |
| IPI00022434 | Uncharacterized protein ALB | A.DLPSLAADFVESKDVCK.N                 | 2 | 5.26 | 0.48 |       |
| IPI00022434 | Uncharacterized protein ALB | A.FAQYLQCCPFEDHVK.L                   | 2 | 5.19 | 0.40 |       |
| IPI00022434 | Uncharacterized protein ALB | A.KVFDEFKPLVEEPQNLIK.Q                | 3 | 6.62 | 0.37 |       |
| IPI00022434 | Uncharacterized protein ALB | C.FSALEVDETYVPK.E                     | 2 | 4.90 | 0.32 |       |
| IPI00022434 | Uncharacterized protein ALB | C.FSALEVDETYVPKEFNAETFFHADICTLSEK.E   | 3 | 6.45 | 0.49 |       |
| IPI00022434 | Uncharacterized protein ALB | C.FSALEVDETYVPKEFNAETFFHADICTLSEKER.Q | 3 | 6.06 | 0.42 |       |
| IPI00022434 | Uncharacterized protein ALB | C.IAEVENDEM*PADLPSLAADFVESK.D         | 2 | 5.54 | 0.49 |       |
| IPI00022434 | Uncharacterized protein ALB | C.TVATLRETYGEMADCCAK.Q                | 2 | 5.00 | 0.45 |       |
| IPI00022434 | Uncharacterized protein ALB | C.VADESAENCDKSLHTLFGDKLCTVATLR.E      | 3 | 5.71 | 0.44 |       |
| IPI00022434 | Uncharacterized protein ALB | D.LPSLAADFVESKDVCK.N                  | 1 | 4.13 | 0.38 |       |
| IPI00022434 | Uncharacterized protein ALB | D.VFLGM*FLYEYAR.R                     | 2 | 3.66 | 0.43 | -4.13 |
| IPI00022434 | Uncharacterized protein ALB | E.FAEVSKLVTDLTK.V                     | 2 | 4.99 | 0.38 |       |
| IPI00022434 | Uncharacterized protein ALB | E.MPADLPSLAADFVESK.D                  | 1 | 4.14 | 0.34 |       |
| IPI00022434 | Uncharacterized protein ALB | E.PQNLIKQNCLEFQQLGEYK.F               | 2 | 5.83 | 0.50 |       |
| IPI00022434 | Uncharacterized protein ALB | E.PQNLIKQNCLEFQQLGEYKFNALLVR.Y        | 3 | 7.04 | 0.46 |       |
| IPI00022434 | Uncharacterized protein ALB | E.SAENCDKSLHTLFGDKLCTVATLR.E          | 3 | 6.80 | 0.31 |       |
| IPI00022434 | Uncharacterized protein ALB | E.TFFHADICTLSEKER.Q                   | 2 | 4.95 | 0.39 |       |
| IPI00022434 | Uncharacterized protein ALB | E.VENDEM*PADLPSLAADFVESK.D            | 2 | 5.73 | 0.50 |       |
| IPI00022434 | Uncharacterized protein ALB | F.AQYLQCCPFEDHVKLVNEVTEFAK.T          | 2 | 5.08 | 0.35 |       |
| IPI00022434 | Uncharacterized protein ALB | H.CIAEVENDEM*PADLPSLAADFVESKDVCK.N    | 3 | 5.79 | 0.36 |       |
| IPI00022434 | Uncharacterized protein ALB | I.AFAQYLQCCPFEDHVK.L                  | 2 | 5.05 | 0.46 |       |
| IPI00022434 | Uncharacterized protein ALB | K.AACLLPKLDELDEGK.A                   | 1 | 3.62 | 0.15 |       |
| IPI00022434 | Uncharacterized protein ALB | K.AACLLPKLDELDEGK.A                   | 2 | 4.01 | 0.24 |       |
| IPI00022434 | Uncharacterized protein ALB | K.AACLLPKLDELDEGK.A                   | 3 | 3.95 | 0.30 |       |
| IPI00022434 | Uncharacterized protein ALB | K.AACLLPKLDELDEGKASSAK.Q              | 2 | 4.50 | 0.35 |       |
| IPI00022434 | Uncharacterized protein ALB | K.AACLLPKLDELDEGKASSAK.Q              | 3 | 4.06 | 0.27 |       |
| IPI00022434 | Uncharacterized protein ALB | K.AAFTECCQAADK.A                      | 1 | 3.41 | 0.45 |       |
| IPI00022434 | Uncharacterized protein ALB | K.AAFTECCQAADK.A                      | 2 | 3.99 | 0.38 |       |
| IPI00022434 | Uncharacterized protein ALB | K.AAFTECCQAADKAAACLLPK.L              | 2 | 5.70 | 0.50 |       |
| IPI00022434 | Uncharacterized protein ALB | K.AAFTECCQAADKAAACLLPK.L              | 3 | 5.42 | 0.42 |       |
| IPI00022434 | Uncharacterized protein ALB | K.AAFTECCQAADKAAACLLPKLDEL.R          | 3 | 5.75 | 0.39 |       |

|             |                             |                                        |   |      |      |       |
|-------------|-----------------------------|----------------------------------------|---|------|------|-------|
| IPI00022434 | Uncharacterized protein ALB | K.AAFTECCQAADKAACLLPKLDELREDEGK.A      | 2 | 4.50 | 0.37 |       |
| IPI00022434 | Uncharacterized protein ALB | K.AAFTECCQAADKAACLLPKLDELREDEGK.A      | 3 | 5.24 | 0.37 |       |
| IPI00022434 | Uncharacterized protein ALB | K.AAFTECCQAADKAACLLPKLDELREDEGKASSAK.Q | 3 | 6.45 | 0.51 |       |
| IPI00022434 | Uncharacterized protein ALB | K.AEFAEVS.K.L                          | 1 | 2.70 | 0.11 |       |
| IPI00022434 | Uncharacterized protein ALB | K.AEFAEVS.K.L                          | 2 | 2.32 | 0.06 | -2.27 |
| IPI00022434 | Uncharacterized protein ALB | K.AEFAEVS.KLVTDLTK.V                   | 1 | 3.71 | 0.40 |       |
| IPI00022434 | Uncharacterized protein ALB | K.AEFAEVS.KLVTDLTK.V                   | 2 | 4.59 | 0.44 | -3.50 |
| IPI00022434 | Uncharacterized protein ALB | K.AEFAEVS.KLVTDLTK.V                   | 3 | 3.57 | 0.24 | -4.12 |
| IPI00022434 | Uncharacterized protein ALB | K.ALVLIAFAQYLQQCPFEDHVK.L              | 2 | 4.90 | 0.41 |       |
| IPI00022434 | Uncharacterized protein ALB | K.ALVLIAFAQYLQQCPFEDHVK.L              | 2 | 6.15 | 0.53 |       |
| IPI00022434 | Uncharacterized protein ALB | K.ALVLIAFAQYLQQCPFEDHVK.L              | 3 | 6.24 | 0.54 |       |
| IPI00022434 | Uncharacterized protein ALB | K.ALVLIAFAQYLQQCPFEDHVKLVNEVTEFAK.T    | 3 | 6.51 | 0.50 |       |
| IPI00022434 | Uncharacterized protein ALB | K.ATKEQLKAVM*DDFAAFVEK.C               | 2 | 6.27 | 0.48 |       |
| IPI00022434 | Uncharacterized protein ALB | K.ATKEQLKAVM*DDFAAFVEK.C               | 3 | 5.05 | 0.42 |       |
| IPI00022434 | Uncharacterized protein ALB | K.ATKEQLKAVMDDFAAFVEK.C                | 2 | 6.09 | 0.52 |       |
| IPI00022434 | Uncharacterized protein ALB | K.ATKEQLKAVMDDFAAFVEK.C                | 3 | 4.63 | 0.36 |       |
| IPI00022434 | Uncharacterized protein ALB | K.AVM*DDFAAFVEK.C                      | 1 | 3.46 | 0.41 |       |
| IPI00022434 | Uncharacterized protein ALB | K.AVM*DDFAAFVEK.C                      | 2 | 2.72 | 0.20 | -4.62 |
| IPI00022434 | Uncharacterized protein ALB | K.AVM*DDFAAFVEK.C                      | 3 | 4.27 | 0.17 |       |
| IPI00022434 | Uncharacterized protein ALB | K.AVMDDFAAFVEK.C                       | 1 | 3.38 | 0.39 |       |
| IPI00022434 | Uncharacterized protein ALB | K.AVMDDFAAFVEK.C                       | 2 | 4.72 | 0.45 |       |
| IPI00022434 | Uncharacterized protein ALB | K.AVMDDFAAFVEK.C                       | 3 | 4.80 | 0.31 |       |
| IPI00022434 | Uncharacterized protein ALB | K.AVMDDFAAFVEKCKC.A                    | 2 | 3.36 | 0.24 |       |
| IPI00022434 | Uncharacterized protein ALB | K.CASLQKFGGER.A                        | 2 | 3.03 | 0.18 |       |
| IPI00022434 | Uncharacterized protein ALB | K.CCAAADPHECYAK.V                      | 1 | 3.25 | 0.49 |       |
| IPI00022434 | Uncharacterized protein ALB | K.CCAAADPHECYAK.V                      | 2 | 5.15 | 0.46 |       |
| IPI00022434 | Uncharacterized protein ALB | K.CCAAADPHECYAKVFDEFKPLVEEPQNLIK.Q     | 3 | 5.66 | 0.38 |       |
| IPI00022434 | Uncharacterized protein ALB | K.CCTESLVNR.R                          | 1 | 3.26 | 0.42 |       |
| IPI00022434 | Uncharacterized protein ALB | K.CCTESLVNR.R                          | 2 | 3.78 | 0.39 |       |
| IPI00022434 | Uncharacterized protein ALB | K.CCTESLVNRRPCFSALEVEDETYVVK.E         | 3 | 4.01 | 0.32 |       |
| IPI00022434 | Uncharacterized protein ALB | K.DDNPNLPR.L                           | 2 | 2.71 | 0.16 |       |
| IPI00022434 | Uncharacterized protein ALB | K.DLGEENFK.A                           | 1 | 2.48 | 0.19 |       |
| IPI00022434 | Uncharacterized protein ALB | K.DLGEENFK.A                           | 2 | 2.99 | 0.11 |       |
| IPI00022434 | Uncharacterized protein ALB | K.DLGEENFKALVLIAFAQYLQQCPFEDHVK.L      | 3 | 5.80 | 0.53 |       |
| IPI00022434 | Uncharacterized protein ALB | K.DVCKNYAEAK.D                         | 1 | 2.80 | 0.28 |       |
| IPI00022434 | Uncharacterized protein ALB | K.DVCKNYAEAK.D                         | 2 | 3.15 | 0.28 |       |
| IPI00022434 | Uncharacterized protein ALB | K.DVCKNYAEAK.D                         | 3 | 2.72 | 0.23 |       |
| IPI00022434 | Uncharacterized protein ALB | K.DVCKNYAEAKDVFLGM*FLYEYAR.R           | 2 | 5.81 | 0.52 |       |
| IPI00022434 | Uncharacterized protein ALB | K.DVCKNYAEAKDVFLGM*FLYEYAR.R           | 3 | 6.16 | 0.51 |       |
| IPI00022434 | Uncharacterized protein ALB | K.DVCKNYAEAKDVFLGMFLYEYAR.R            | 2 | 5.40 | 0.53 |       |
| IPI00022434 | Uncharacterized protein ALB | K.DVCKNYAEAKDVFLGMFLYEYAR.R            | 3 | 5.99 | 0.53 |       |
| IPI00022434 | Uncharacterized protein ALB | K.DVFLGM*FLYEYAR.R                     | 2 | 3.99 | 0.47 | -5.06 |



|             |                             |                           |   |      |      |       |
|-------------|-----------------------------|---------------------------|---|------|------|-------|
| IPI00022434 | Uncharacterized protein ALB | K.DVFLGM*FLYEYAR.R        | 3 | 5.36 | 0.36 |       |
| IPI00022434 | Uncharacterized protein ALB | K.DVFLGMFLYEYAR.R         | 1 | 4.45 | 0.40 |       |
| IPI00022434 | Uncharacterized protein ALB | K.DVFLGMFLYEYAR.R         | 2 | 3.34 | 0.41 | -5.62 |
| IPI00022434 | Uncharacterized protein ALB | K.DVFLGMFLYEYAR.R         | 3 | 4.99 | 0.43 |       |
| IPI00022434 | Uncharacterized protein ALB | K.ECCEKPLLEK.S            | 1 | 2.75 | 0.15 |       |
| IPI00022434 | Uncharacterized protein ALB | K.ECCEKPLLEK.S            | 2 | 2.89 | 0.28 |       |
| IPI00022434 | Uncharacterized protein ALB | K.EFNAETFFHADICTLSEK.E    | 2 | 6.58 | 0.56 |       |
| IPI00022434 | Uncharacterized protein ALB | K.EFNAETFFHADICTLSEK.E    | 3 | 3.55 | 0.39 |       |
| IPI00022434 | Uncharacterized protein ALB | K.EFNAETFFHADICTLSEKER.Q  | 2 | 5.54 | 0.57 |       |
| IPI00022434 | Uncharacterized protein ALB | K.EFNAETFFHADICTLSEKER.Q  | 3 | 5.35 | 0.42 |       |
| IPI00022434 | Uncharacterized protein ALB | K.EQLKAVM*DDFAAFVEK.C     | 1 | 3.76 | 0.46 |       |
| IPI00022434 | Uncharacterized protein ALB | K.EQLKAVM*DDFAAFVEK.C     | 2 | 5.62 | 0.47 |       |
| IPI00022434 | Uncharacterized protein ALB | K.EQLKAVM*DDFAAFVEK.C     | 3 | 3.90 | 0.30 |       |
| IPI00022434 | Uncharacterized protein ALB | K.EQLKAVMDDFAAFVEK.C      | 1 | 5.01 | 0.49 |       |
| IPI00022434 | Uncharacterized protein ALB | K.EQLKAVMDDFAAFVEK.C      | 2 | 5.14 | 0.48 |       |
| IPI00022434 | Uncharacterized protein ALB | K.EQLKAVMDDFAAFVEK.C      | 3 | 4.60 | 0.44 |       |
| IPI00022434 | Uncharacterized protein ALB | K.FQNALLVR.Y              | 1 | 1.76 | 0.09 | -1.15 |
| IPI00022434 | Uncharacterized protein ALB | K.FQNALLVR.Y              | 2 | 3.03 | 0.15 | -2.03 |
| IPI00022434 | Uncharacterized protein ALB | K.HKPKATKEQLK.A           | 3 | 2.92 | 0.14 |       |
| IPI00022434 | Uncharacterized protein ALB | K.KQTALVELVK.H            | 1 | 2.79 | 0.27 |       |
| IPI00022434 | Uncharacterized protein ALB | K.KQTALVELVK.H            | 2 | 3.26 | 0.24 |       |
| IPI00022434 | Uncharacterized protein ALB | K.KVPQVSTPTLVEVSR.N       | 1 | 4.15 | 0.48 |       |
| IPI00022434 | Uncharacterized protein ALB | K.KVPQVSTPTLVEVSR.N       | 2 | 3.59 | 0.45 | -4.27 |
| IPI00022434 | Uncharacterized protein ALB | K.KVPQVSTPTLVEVSR.N       | 3 | 4.86 | 0.49 | -3.58 |
| IPI00022434 | Uncharacterized protein ALB | K.KVPQVSTPTLVEVSRNLGK.V   | 2 | 3.37 | 0.40 |       |
| IPI00022434 | Uncharacterized protein ALB | K.KVPQVSTPTLVEVSRNLGK.V   | 3 | 3.70 | 0.34 |       |
| IPI00022434 | Uncharacterized protein ALB | K.KYLYEIAR.R              | 1 | 2.61 | 0.23 |       |
| IPI00022434 | Uncharacterized protein ALB | K.KYLYEIAR.R              | 2 | 3.13 | 0.29 |       |
| IPI00022434 | Uncharacterized protein ALB | K.KYLYEIARR.H             | 2 | 2.58 | 0.18 |       |
| IPI00022434 | Uncharacterized protein ALB | K.LCTVATLR.E              | 2 | 1.80 | 0.09 | -1.03 |
| IPI00022434 | Uncharacterized protein ALB | K.LCTVATLRETYGEM*ADCCAK.Q | 2 | 3.99 | 0.43 |       |
| IPI00022434 | Uncharacterized protein ALB | K.LCTVATLRETYGEM*ADCCAK.Q | 3 | 5.99 | 0.45 |       |
| IPI00022434 | Uncharacterized protein ALB | K.LCTVATLRETYGEMADCCAK.Q  | 2 | 5.46 | 0.40 |       |
| IPI00022434 | Uncharacterized protein ALB | K.LCTVATLRETYGEMADCCAK.Q  | 3 | 6.21 | 0.51 |       |
| IPI00022434 | Uncharacterized protein ALB | K.LDELRDEGK.A             | 2 | 2.16 | 0.06 | -1.65 |
| IPI00022434 | Uncharacterized protein ALB | K.LDELRDEGKASSAK.Q        | 1 | 2.41 | 0.10 |       |
| IPI00022434 | Uncharacterized protein ALB | K.LDELRDEGKASSAK.Q        | 2 | 4.30 | 0.40 |       |
| IPI00022434 | Uncharacterized protein ALB | K.LDELRDEGKASSAK.Q        | 3 | 3.23 | 0.39 | -1.52 |
| IPI00022434 | Uncharacterized protein ALB | K.LDELRDEGKASSAKQR.L      | 3 | 4.06 | 0.36 |       |
| IPI00022434 | Uncharacterized protein ALB | K.LKECCEKPLLEK.S          | 1 | 3.16 | 0.24 |       |
| IPI00022434 | Uncharacterized protein ALB | K.LKECCEKPLLEK.S          | 2 | 4.46 | 0.29 |       |
| IPI00022434 | Uncharacterized protein ALB | K.LKECCEKPLLEK.S          | 3 | 4.40 | 0.22 |       |

|             |                             |                                              |   |      |      |       |
|-------------|-----------------------------|----------------------------------------------|---|------|------|-------|
| IPI00022434 | Uncharacterized protein ALB | K.LKECCEKPLLEKSHCIAEVENDEM*PADLPSLAADFVESK.D | 3 | 3.46 | 0.15 |       |
| IPI00022434 | Uncharacterized protein ALB | K.LKECCEKPLLEKSHCIAEVENDEMPADLPSLAADFVESK.D  | 3 | 3.17 | 0.11 |       |
| IPI00022434 | Uncharacterized protein ALB | K.LVNEVTEFAK.T                               | 1 | 2.68 | 0.32 | -4.02 |
| IPI00022434 | Uncharacterized protein ALB | K.LVNEVTEFAK.T                               | 2 | 3.64 | 0.35 | -4.34 |
| IPI00022434 | Uncharacterized protein ALB | K.LVNEVTEFAKTCVADESAENCDK.S                  | 3 | 5.17 | 0.43 |       |
| IPI00022434 | Uncharacterized protein ALB | K.LVTDLTK.V                                  | 1 | 2.20 | 0.11 |       |
| IPI00022434 | Uncharacterized protein ALB | K.LVTDLTKVHTECCHGDLLCADDR.A                  | 2 | 4.79 | 0.46 |       |
| IPI00022434 | Uncharacterized protein ALB | K.LVTDLTKVHTECCHGDLLCADDR.A                  | 3 | 7.23 | 0.53 |       |
| IPI00022434 | Uncharacterized protein ALB | K.LVTDLTKVHTECCHGDLLCADDRADLAK.Y             | 2 | 4.02 | 0.42 |       |
| IPI00022434 | Uncharacterized protein ALB | K.LVTDLTKVHTECCHGDLLCADDRADLAK.Y             | 3 | 5.08 | 0.30 |       |
| IPI00022434 | Uncharacterized protein ALB | K.NYAEAKDVFLGM*FLYEYAR.R                     | 2 | 5.71 | 0.54 |       |
| IPI00022434 | Uncharacterized protein ALB | K.NYAEAKDVFLGM*FLYEYAR.R                     | 3 | 3.08 | 0.08 | -4.06 |
| IPI00022434 | Uncharacterized protein ALB | K.NYAEAKDVFLGMFLYEYAR.R                      | 2 | 5.95 | 0.48 |       |
| IPI00022434 | Uncharacterized protein ALB | K.NYAEAKDVFLGMFLYEYAR.R                      | 3 | 4.91 | 0.36 |       |
| IPI00022434 | Uncharacterized protein ALB | K.QEPERNECFLQHKDDNPNLPR.L                    | 2 | 4.25 | 0.36 |       |
| IPI00022434 | Uncharacterized protein ALB | K.QEPERNECFLQHKDDNPNLPR.L                    | 3 | 5.72 | 0.36 |       |
| IPI00022434 | Uncharacterized protein ALB | K.QNCELFEQLGEYK.F                            | 1 | 3.85 | 0.33 |       |
| IPI00022434 | Uncharacterized protein ALB | K.QNCELFEQLGEYK.F                            | 2 | 3.52 | 0.44 | -2.05 |
| IPI00022434 | Uncharacterized protein ALB | K.QNCELFEQLGEYK.F                            | 3 | 4.54 | 0.25 |       |
| IPI00022434 | Uncharacterized protein ALB | K.QNCELFEQLGEYKFNALLVR.Y                     | 2 | 5.42 | 0.38 |       |
| IPI00022434 | Uncharacterized protein ALB | K.QNCELFEQLGEYKFNALLVR.Y                     | 3 | 6.95 | 0.48 |       |
| IPI00022434 | Uncharacterized protein ALB | K.QTALVELVK.H                                | 1 | 1.96 | 0.13 |       |
| IPI00022434 | Uncharacterized protein ALB | K.QTALVELVK.H                                | 2 | 1.80 | 0.10 | -1.82 |
| IPI00022434 | Uncharacterized protein ALB | K.RM*PCAEDYLSVVLNQLCVLHEK.T                  | 2 | 4.36 | 0.39 |       |
| IPI00022434 | Uncharacterized protein ALB | K.RM*PCAEDYLSVVLNQLCVLHEK.T                  | 3 | 7.25 | 0.47 |       |
| IPI00022434 | Uncharacterized protein ALB | K.RM*PCAEDYLSVVLNQLCVLHEKTPVSDR.V            | 3 | 4.69 | 0.39 |       |
| IPI00022434 | Uncharacterized protein ALB | K.RM*PCAEDYLSVVLNQLCVLHEKTPVSDRVTK.C         | 3 | 4.04 | 0.28 |       |
| IPI00022434 | Uncharacterized protein ALB | K.RMPCAEDYLSVVLNQLCVLHEK.T                   | 2 | 5.25 | 0.45 |       |
| IPI00022434 | Uncharacterized protein ALB | K.RMPCAEDYLSVVLNQLCVLHEK.T                   | 3 | 6.52 | 0.47 |       |
| IPI00022434 | Uncharacterized protein ALB | K.RMPCAEDYLSVVLNQLCVLHEKTPVSDR.V             | 3 | 5.15 | 0.32 |       |
| IPI00022434 | Uncharacterized protein ALB | K.SHCIAEVENDEM*PAD.L                         | 2 | 5.40 | 0.43 |       |
| IPI00022434 | Uncharacterized protein ALB | K.SHCIAEVENDEM*PADLPSLAADFVESK.D             | 2 | 6.10 | 0.55 |       |
| IPI00022434 | Uncharacterized protein ALB | K.SHCIAEVENDEM*PADLPSLAADFVESK.D             | 3 | 6.12 | 0.57 | -4.57 |
| IPI00022434 | Uncharacterized protein ALB | K.SHCIAEVENDEM*PADLPSLAADFVESK.D.V           | 3 | 5.94 | 0.29 |       |
| IPI00022434 | Uncharacterized protein ALB | K.SHCIAEVENDEM*PADLPSLAADFVESKDVCK.N         | 2 | 5.61 | 0.60 |       |
| IPI00022434 | Uncharacterized protein ALB | K.SHCIAEVENDEM*PADLPSLAADFVESKDVCK.N         | 3 | 7.63 | 0.56 |       |
| IPI00022434 | Uncharacterized protein ALB | K.SHCIAEVENDEM*PADLPSLAADFVESKDVCKNYAEAK.D   | 3 | 6.65 | 0.57 |       |
| IPI00022434 | Uncharacterized protein ALB | K.SHCIAEVENDEMPADLPSLAADFVESK.D              | 2 | 6.14 | 0.54 |       |
| IPI00022434 | Uncharacterized protein ALB | K.SHCIAEVENDEMPADLPSLAADFVESK.D              | 3 | 6.62 | 0.53 |       |
| IPI00022434 | Uncharacterized protein ALB | K.SHCIAEVENDEMPADLPSLAADFVESKDVCK.N          | 2 | 5.73 | 0.58 |       |
| IPI00022434 | Uncharacterized protein ALB | K.SHCIAEVENDEMPADLPSLAADFVESKDVCK.N          | 3 | 7.27 | 0.55 |       |
| IPI00022434 | Uncharacterized protein ALB | K.SHCIAEVENDEMPADLPSLAADFVESKDVCKNYAEAK.D    | 3 | 7.14 | 0.51 |       |

|             |                             |                                                 |   |      |      |       |
|-------------|-----------------------------|-------------------------------------------------|---|------|------|-------|
| IPI00022434 | Uncharacterized protein ALB | K.SLHTLFGDK.L                                   | 1 | 2.93 | 0.27 |       |
| IPI00022434 | Uncharacterized protein ALB | K.SLHTLFGDK.L                                   | 2 | 1.81 | 0.10 | -1.35 |
| IPI00022434 | Uncharacterized protein ALB | K.SLHTLFGDKLCTVATLR.E                           | 2 | 5.67 | 0.52 |       |
| IPI00022434 | Uncharacterized protein ALB | K.SLHTLFGDKLCTVATLR.E                           | 3 | 5.10 | 0.51 |       |
| IPI00022434 | Uncharacterized protein ALB | K.SLHTLFGDKLCTVATLRETYGEM*ADCCAK.Q              | 3 | 5.26 | 0.46 |       |
| IPI00022434 | Uncharacterized protein ALB | K.SLHTLFGDKLCTVATLRETYGEMADCCAK.Q               | 3 | 5.27 | 0.43 |       |
| IPI00022434 | Uncharacterized protein ALB | K.TCVADESAENCDK.S                               | 1 | 3.35 | 0.39 |       |
| IPI00022434 | Uncharacterized protein ALB | K.TCVADESAENCDK.S                               | 2 | 4.99 | 0.38 |       |
| IPI00022434 | Uncharacterized protein ALB | K.TCVADESAENCDKSLH.T                            | 2 | 4.98 | 0.42 |       |
| IPI00022434 | Uncharacterized protein ALB | K.TCVADESAENCDKSLHTLFGDK.L                      | 2 | 5.16 | 0.49 |       |
| IPI00022434 | Uncharacterized protein ALB | K.TCVADESAENCDKSLHTLFGDK.L                      | 3 | 5.24 | 0.45 |       |
| IPI00022434 | Uncharacterized protein ALB | K.TCVADESAENCDKSLHTLFGDKLCTVATLR.E              | 2 | 4.74 | 0.50 |       |
| IPI00022434 | Uncharacterized protein ALB | K.TCVADESAENCDKSLHTLFGDKLCTVATLR.E              | 3 | 8.62 | 0.58 |       |
| IPI00022434 | Uncharacterized protein ALB | K.TCVADESAENCDKSLHTLFGDKLCTVATLRETYGEM*ADCCAK.Q | 3 | 5.06 | 0.41 |       |
| IPI00022434 | Uncharacterized protein ALB | K.TCVADESAENCDKSLHTLFGDKLCTVATLRETYGEMADCCAK.Q  | 3 | 5.62 | 0.28 |       |
| IPI00022434 | Uncharacterized protein ALB | K.TPVSDRVTK.C                                   | 2 | 2.16 | 0.06 | -2.14 |
| IPI00022434 | Uncharacterized protein ALB | K.TPVSDRVTKCCTESLVNR.R                          | 3 | 4.31 | 0.40 |       |
| IPI00022434 | Uncharacterized protein ALB | K.TYETTLEK.C                                    | 1 | 1.93 | 0.10 |       |
| IPI00022434 | Uncharacterized protein ALB | K.TYETTLEK.C                                    | 2 | 2.62 | 0.23 |       |
| IPI00022434 | Uncharacterized protein ALB | K.TYETTLEKCCAAADPHECYAK.V                       | 2 | 5.25 | 0.50 |       |
| IPI00022434 | Uncharacterized protein ALB | K.TYETTLEKCCAAADPHECYAK.V                       | 3 | 5.13 | 0.32 |       |
| IPI00022434 | Uncharacterized protein ALB | K.VFDEFKPLVEEPQNLIK.Q                           | 2 | 4.55 | 0.39 | -5.33 |
| IPI00022434 | Uncharacterized protein ALB | K.VFDEFKPLVEEPQNLIK.Q                           | 3 | 4.84 | 0.32 | -4.89 |
| IPI00022434 | Uncharacterized protein ALB | K.VFDEFKPLVEEPQNLIKQNCELFEQLGEYK.F              | 3 | 7.59 | 0.48 |       |
| IPI00022434 | Uncharacterized protein ALB | K.VFDEFKPLVEEPQNLIKQNCELFEQLGEYKFQNALLVR.Y      | 3 | 6.11 | 0.54 |       |
| IPI00022434 | Uncharacterized protein ALB | K.VHTECCHGDLLCADDR.A                            | 2 | 6.67 | 0.60 |       |
| IPI00022434 | Uncharacterized protein ALB | K.VHTECCHGDLLCADDR.A                            | 3 | 5.51 | 0.45 |       |
| IPI00022434 | Uncharacterized protein ALB | K.VHTECCHGDLLCADDRADLAK.Y                       | 2 | 5.13 | 0.43 |       |
| IPI00022434 | Uncharacterized protein ALB | K.VHTECCHGDLLCADDRADLAK.Y                       | 3 | 6.44 | 0.50 |       |
| IPI00022434 | Uncharacterized protein ALB | K.VHTECCHGDLLCADDRADLAKYICENQDSISSK.L           | 3 | 4.92 | 0.43 |       |
| IPI00022434 | Uncharacterized protein ALB | K.VPQVSTPTLVEVSR.N                              | 1 | 3.38 | 0.40 |       |
| IPI00022434 | Uncharacterized protein ALB | K.VPQVSTPTLVEVSR.N                              | 2 | 3.92 | 0.45 |       |
| IPI00022434 | Uncharacterized protein ALB | K.VPQVSTPTLVEVSR.N                              | 3 | 3.70 | 0.29 |       |
| IPI00022434 | Uncharacterized protein ALB | K.VPQVSTPTLVEVSRNLGK.V                          | 3 | 2.66 | 0.20 |       |
| IPI00022434 | Uncharacterized protein ALB | K.YICENQDSISSK.L                                | 1 | 3.56 | 0.39 |       |
| IPI00022434 | Uncharacterized protein ALB | K.YICENQDSISSK.L                                | 2 | 1.96 | 0.16 | -2.00 |
| IPI00022434 | Uncharacterized protein ALB | K.YICENQDSISSK.L                                | 3 | 2.98 | 0.10 |       |
| IPI00022434 | Uncharacterized protein ALB | K.YICENQDSISSKLE                                | 2 | 4.73 | 0.43 |       |
| IPI00022434 | Uncharacterized protein ALB | K.YICENQDSISSKLEKCEKPLLEK.S                     | 3 | 5.80 | 0.27 |       |
| IPI00022434 | Uncharacterized protein ALB | K.YLYEIAR.R                                     | 1 | 2.31 | 0.18 |       |
| IPI00022434 | Uncharacterized protein ALB | K.YLYEIAR.R                                     | 2 | 3.11 | 0.26 |       |
| IPI00022434 | Uncharacterized protein ALB | L.FEQLGEYKFQNALLVR.Y                            | 2 | 5.33 | 0.32 |       |

|             |                             |                                        |   |      |      |       |
|-------------|-----------------------------|----------------------------------------|---|------|------|-------|
| IPI00022434 | Uncharacterized protein ALB | L.IAFAQYLQQCPFEDHVK.L                  | 2 | 5.51 | 0.48 |       |
| IPI00022434 | Uncharacterized protein ALB | L.IKQNCLELFEQLGEYK.F                   | 2 | 4.99 | 0.28 |       |
| IPI00022434 | Uncharacterized protein ALB | L.PSLAADFVESKDVCK.N                    | 1 | 4.05 | 0.37 |       |
| IPI00022434 | Uncharacterized protein ALB | L.PSLAADFVESKDVCK.N                    | 2 | 5.36 | 0.39 |       |
| IPI00022434 | Uncharacterized protein ALB | L.VLIAFAQYLQQCPFEDHVK.L                | 2 | 5.55 | 0.45 |       |
| IPI00022434 | Uncharacterized protein ALB | M.PADLPSLAADFVESK.D                    | 1 | 4.03 | 0.52 |       |
| IPI00022434 | Uncharacterized protein ALB | M.PADLPSLAADFVESK.D                    | 2 | 5.47 | 0.47 |       |
| IPI00022434 | Uncharacterized protein ALB | M.PADLPSLAADFVESKDVCK.N                | 2 | 6.02 | 0.51 |       |
| IPI00022434 | Uncharacterized protein ALB | M.PCAEDYLSVVLNQLCVLHEK.T               | 3 | 6.35 | 0.43 |       |
| IPI00022434 | Uncharacterized protein ALB | N.CDKSLHTLFGDKLCTVATLR.E               | 2 | 5.54 | 0.52 |       |
| IPI00022434 | Uncharacterized protein ALB | P.CAEDYLSVVLNQLCVLHEK.T                | 2 | 5.18 | 0.36 |       |
| IPI00022434 | Uncharacterized protein ALB | P.CAEDYLSVVLNQLCVLHEK.T                | 3 | 6.03 | 0.45 |       |
| IPI00022434 | Uncharacterized protein ALB | P.CFSALEVDETYVPK.E                     | 2 | 5.56 | 0.47 |       |
| IPI00022434 | Uncharacterized protein ALB | R.ADLAKYICENQDSISSK.L                  | 2 | 5.03 | 0.43 |       |
| IPI00022434 | Uncharacterized protein ALB | R.AFKAWAVAR.L                          | 1 | 2.21 | 0.23 |       |
| IPI00022434 | Uncharacterized protein ALB | R.AFKAWAVAR.L                          | 2 | 3.16 | 0.26 |       |
| IPI00022434 | Uncharacterized protein ALB | R.DAHKSEVAHR.F                         | 2 | 2.69 | 0.26 |       |
| IPI00022434 | Uncharacterized protein ALB | R.DEGKASSAK.Q                          | 1 | 2.24 | 0.15 |       |
| IPI00022434 | Uncharacterized protein ALB | R.ETYGEM*ADCCAK.Q                      | 1 | 2.84 | 0.34 |       |
| IPI00022434 | Uncharacterized protein ALB | R.ETYGEM*ADCCAK.Q                      | 2 | 3.10 | 0.34 | -3.76 |
| IPI00022434 | Uncharacterized protein ALB | R.ETYGEM*ADCCAKQEPER.N                 | 2 | 3.90 | 0.27 |       |
| IPI00022434 | Uncharacterized protein ALB | R.ETYGEM*ADCCAKQEPERNECFLQHK.D         | 3 | 4.59 | 0.38 |       |
| IPI00022434 | Uncharacterized protein ALB | R.ETYGEM*ADCCAKQEPERNECFLQHKDDNPNLPR.L | 3 | 4.03 | 0.39 |       |
| IPI00022434 | Uncharacterized protein ALB | R.ETYGEMADCCAK.Q                       | 1 | 3.26 | 0.45 |       |
| IPI00022434 | Uncharacterized protein ALB | R.ETYGEMADCCAK.Q                       | 2 | 4.18 | 0.47 |       |
| IPI00022434 | Uncharacterized protein ALB | R.ETYGEMADCCAKQEPER.N                  | 2 | 3.97 | 0.34 |       |
| IPI00022434 | Uncharacterized protein ALB | R.ETYGEMADCCAKQEPERNECFLQHKDDNPNLPR.L  | 3 | 3.83 | 0.29 |       |
| IPI00022434 | Uncharacterized protein ALB | R.FKDLGEENFK.A                         | 1 | 3.27 | 0.31 |       |
| IPI00022434 | Uncharacterized protein ALB | R.FKDLGEENFK.A                         | 2 | 3.67 | 0.24 |       |
| IPI00022434 | Uncharacterized protein ALB | R.FKDLGEENFK.A                         | 3 | 2.78 | 0.18 | -3.67 |
| IPI00022434 | Uncharacterized protein ALB | R.FKDLGEENFKALVLIAFAQYLQQCPFEDHVK.L    | 3 | 7.57 | 0.58 |       |
| IPI00022434 | Uncharacterized protein ALB | R.FPKAEFAEVSK.L                        | 1 | 3.28 | 0.29 |       |
| IPI00022434 | Uncharacterized protein ALB | R.FPKAEFAEVSK.L                        | 2 | 3.86 | 0.31 |       |
| IPI00022434 | Uncharacterized protein ALB | R.FPKAEFAEVSK.L                        | 3 | 4.48 | 0.30 |       |
| IPI00022434 | Uncharacterized protein ALB | R.FPKAEFAEVSKLVTDLTK.V                 | 2 | 6.07 | 0.48 |       |
| IPI00022434 | Uncharacterized protein ALB | R.FPKAEFAEVSKLVTDLTK.V                 | 3 | 5.52 | 0.39 |       |
| IPI00022434 | Uncharacterized protein ALB | R.HPDYSVLLLLR.L                        | 1 | 3.42 | 0.37 |       |
| IPI00022434 | Uncharacterized protein ALB | R.HPDYSVLLLLR.L                        | 2 | 2.94 | 0.36 |       |
| IPI00022434 | Uncharacterized protein ALB | R.HPDYSVLLLLR.L                        | 3 | 4.45 | 0.12 |       |
| IPI00022434 | Uncharacterized protein ALB | R.HPYFYAPELLFFAK.R                     | 1 | 4.65 | 0.47 |       |
| IPI00022434 | Uncharacterized protein ALB | R.HPYFYAPELLFFAK.R                     | 2 | 3.11 | 0.35 |       |
| IPI00022434 | Uncharacterized protein ALB | R.HPYFYAPELLFFAK.R                     | 3 | 3.33 | 0.28 | -2.89 |

|             |                             |                                           |   |      |      |       |
|-------------|-----------------------------|-------------------------------------------|---|------|------|-------|
| IPI00022434 | Uncharacterized protein ALB | R.HPYFYAPELLFFAKR.Y                       | 3 | 4.41 | 0.36 |       |
| IPI00022434 | Uncharacterized protein ALB | R.LAKTYETTLEK.C                           | 1 | 2.80 | 0.23 |       |
| IPI00022434 | Uncharacterized protein ALB | R.LAKTYETTLEK.C                           | 2 | 3.39 | 0.31 |       |
| IPI00022434 | Uncharacterized protein ALB | R.LAKTYETTLEK.C                           | 3 | 2.39 | 0.11 | 1.05  |
| IPI00022434 | Uncharacterized protein ALB | R.LAKTYETTLEKCCAAADPHECYAK.V              | 3 | 5.45 | 0.35 |       |
| IPI00022434 | Uncharacterized protein ALB | R.LITSHLK.A                               | 2 | 2.28 | 0.11 |       |
| IPI00022434 | Uncharacterized protein ALB | R.LSQRFPKAEFAEVSK.L                       | 2 | 3.95 | 0.32 |       |
| IPI00022434 | Uncharacterized protein ALB | R.LSQRFPKAEFAEVSK.L                       | 3 | 5.85 | 0.39 |       |
| IPI00022434 | Uncharacterized protein ALB | R.LSQRFPKAEFAEVSKLVDTLK.V                 | 3 | 7.14 | 0.47 |       |
| IPI00022434 | Uncharacterized protein ALB | R.LVRPEVDVM*CTAFHDNEETFLK.K               | 2 | 4.61 | 0.42 |       |
| IPI00022434 | Uncharacterized protein ALB | R.LVRPEVDVM*CTAFHDNEETFLK.K               | 3 | 5.81 | 0.46 |       |
| IPI00022434 | Uncharacterized protein ALB | R.LVRPEVDVM*CTAFHDNEETFLKK.Y              | 2 | 3.75 | 0.39 |       |
| IPI00022434 | Uncharacterized protein ALB | R.LVRPEVDVM*CTAFHDNEETFLKK.Y              | 3 | 6.57 | 0.48 |       |
| IPI00022434 | Uncharacterized protein ALB | R.LVRPEVDVM*CTAFHDNEETFLKKYLYEIAR.R       | 3 | 6.13 | 0.40 |       |
| IPI00022434 | Uncharacterized protein ALB | R.LVRPEVDVMCTAFHDNEETFLK.K                | 2 | 4.67 | 0.46 |       |
| IPI00022434 | Uncharacterized protein ALB | R.LVRPEVDVMCTAFHDNEETFLK.K                | 3 | 6.49 | 0.47 |       |
| IPI00022434 | Uncharacterized protein ALB | R.LVRPEVDVMCTAFHDNEETFLKK.Y               | 2 | 4.32 | 0.39 |       |
| IPI00022434 | Uncharacterized protein ALB | R.LVRPEVDVMCTAFHDNEETFLKK.Y               | 3 | 7.14 | 0.47 |       |
| IPI00022434 | Uncharacterized protein ALB | R.M*PCAEDYLSVVLNQLCVLHEK.T                | 2 | 5.36 | 0.46 |       |
| IPI00022434 | Uncharacterized protein ALB | R.M*PCAEDYLSVVLNQLCVLHEK.T                | 3 | 4.25 | 0.37 | -4.98 |
| IPI00022434 | Uncharacterized protein ALB | R.M*PCAEDYLSVVLNQLCVLHEKTPVSDR.V          | 3 | 5.69 | 0.42 |       |
| IPI00022434 | Uncharacterized protein ALB | R.M*PCAEDYLSVVLNQLCVLHEKTPVSDRVTK.C       | 3 | 5.84 | 0.48 |       |
| IPI00022434 | Uncharacterized protein ALB | R.MPCAEDYLSVVLNQLCVLHEK.T                 | 2 | 5.15 | 0.43 |       |
| IPI00022434 | Uncharacterized protein ALB | R.MPCAEDYLSVVLNQLCVLHEK.T                 | 3 | 4.21 | 0.43 | -4.61 |
| IPI00022434 | Uncharacterized protein ALB | R.MPCAEDYLSVVLNQLCVLHEKTPVSDR.V           | 3 | 6.18 | 0.50 |       |
| IPI00022434 | Uncharacterized protein ALB | R.MPCAEDYLSVVLNQLCVLHEKTPVSDRVTK.C        | 3 | 5.28 | 0.39 |       |
| IPI00022434 | Uncharacterized protein ALB | R.NECFLQHK.D                              | 2 | 2.47 | 0.14 |       |
| IPI00022434 | Uncharacterized protein ALB | R.NECFLQHKDDPNLPR.L                       | 1 | 3.59 | 0.32 |       |
| IPI00022434 | Uncharacterized protein ALB | R.NECFLQHKDDPNLPR.L                       | 2 | 4.52 | 0.36 |       |
| IPI00022434 | Uncharacterized protein ALB | R.NECFLQHKDDPNLPR.L                       | 3 | 4.57 | 0.35 |       |
| IPI00022434 | Uncharacterized protein ALB | R.PCFSALEVDETYVPK.E                       | 2 | 5.95 | 0.49 |       |
| IPI00022434 | Uncharacterized protein ALB | R.QIKKQATALVELVK.H                        | 3 | 2.90 | 0.25 |       |
| IPI00022434 | Uncharacterized protein ALB | R.RHPDYSVLLLR.L                           | 2 | 3.78 | 0.40 |       |
| IPI00022434 | Uncharacterized protein ALB | R.RHPDYSVLLLR.L                           | 3 | 5.46 | 0.33 |       |
| IPI00022434 | Uncharacterized protein ALB | R.RHPYFYAPELLFFAK.R                       | 2 | 4.81 | 0.40 |       |
| IPI00022434 | Uncharacterized protein ALB | R.RHPYFYAPELLFFAK.R                       | 3 | 4.26 | 0.32 | -4.29 |
| IPI00022434 | Uncharacterized protein ALB | R.RHPYFYAPELLFFAKR.Y                      | 2 | 3.80 | 0.38 |       |
| IPI00022434 | Uncharacterized protein ALB | R.RPCFSALEVDETYVPK.E                      | 1 | 3.97 | 0.49 |       |
| IPI00022434 | Uncharacterized protein ALB | R.RPCFSALEVDETYVPK.E                      | 2 | 4.52 | 0.40 |       |
| IPI00022434 | Uncharacterized protein ALB | R.RPCFSALEVDETYVPK.E                      | 3 | 3.79 | 0.26 |       |
| IPI00022434 | Uncharacterized protein ALB | R.RPCFSALEVDETYVPKEFNAETFTFHADICTLSEK.E   | 3 | 6.83 | 0.48 |       |
| IPI00022434 | Uncharacterized protein ALB | R.RPCFSALEVDETYVPKEFNAETFTFHADICTLSEKER.Q | 3 | 6.05 | 0.47 |       |

|             |                                  |                                                    |   |      |      |       |
|-------------|----------------------------------|----------------------------------------------------|---|------|------|-------|
| IPI00022434 | Uncharacterized protein ALB      | R.VTKCCTESLVNR.R                                   | 3 | 3.44 | 0.17 |       |
| IPI00022434 | Uncharacterized protein ALB      | R.YKAAFTECCQAADK.A                                 | 1 | 4.06 | 0.49 |       |
| IPI00022434 | Uncharacterized protein ALB      | R.YKAAFTECCQAADK.A                                 | 2 | 5.28 | 0.45 |       |
| IPI00022434 | Uncharacterized protein ALB      | R.YKAAFTECCQAADK.A                                 | 3 | 4.94 | 0.39 |       |
| IPI00022434 | Uncharacterized protein ALB      | R.YKAAFTECCQAADKAACLPLK.L                          | 2 | 5.51 | 0.53 |       |
| IPI00022434 | Uncharacterized protein ALB      | R.YKAAFTECCQAADKAACLPLK.L                          | 3 | 5.35 | 0.47 |       |
| IPI00022434 | Uncharacterized protein ALB      | R.YKAAFTECCQAADKAACLPLKDELREDEGK.A                 | 3 | 6.90 | 0.49 |       |
| IPI00022434 | Uncharacterized protein ALB      | R.YKAAFTECCQAADKAACLPLKDELREDEGKASSAK.Q            | 3 | 6.75 | 0.45 |       |
| IPI00022434 | Uncharacterized protein ALB      | R.YTKKVPQVSTPTLVEVSR.N                             | 2 | 4.95 | 0.33 |       |
| IPI00022434 | Uncharacterized protein ALB      | R.YTKKVPQVSTPTLVEVSR.N                             | 3 | 4.84 | 0.39 |       |
| IPI00022434 | Uncharacterized protein ALB      | S.AENCDKSLHTLFGDKLCTVATLR.E                        | 3 | 5.73 | 0.47 |       |
| IPI00022434 | Uncharacterized protein ALB      | V.ADESAENCDKSLHTLFGDKLCTVATLR.E                    | 3 | 6.13 | 0.42 |       |
| IPI00022434 | Uncharacterized protein ALB      | V.FDEFKPLVEEPQNLKQNCLEFQLGEYK.F                    | 3 | 5.61 | 0.34 |       |
| IPI00022434 | Uncharacterized protein ALB      | V.LIAFAQYLQQCPFEDHVK.L                             | 2 | 5.68 | 0.46 |       |
| IPI00022434 | Uncharacterized protein ALB      | V.MCTAFHDNEETFLKK.Y                                | 2 | 5.06 | 0.34 |       |
| IPI00022434 | Uncharacterized protein ALB      | V.PKEFNAETFTFHADICTLSEK.E                          | 2 | 5.73 | 0.47 |       |
| IPI00022445 | Platelet basic protein precursor | K.GKEESLSDLYAELR.C                                 | 2 | 5.13 | 0.46 | -3.76 |
| IPI00022445 | Platelet basic protein precursor | K.GKEESLSDLYAELR.C                                 | 3 | 3.68 | 0.25 | -2.68 |
| IPI00022445 | Platelet basic protein precursor | K.NIQSLEVIGK.G                                     | 2 | 2.88 | 0.16 | -2.40 |
| IPI00022462 | Transferrin receptor protein 1   | K.VSASPLLYTLIEK.T                                  | 2 | 2.82 | 0.29 |       |
| IPI00022463 | Serotransferrin precursor        | C.GCSTLNQYFGYSGAFK.C                               | 2 | 4.92 | 0.36 |       |
| IPI00022463 | Serotransferrin precursor        | C.PGCGCSTLNQYFGYSGAFK.C                            | 2 | 5.87 | 0.52 |       |
| IPI00022463 | Serotransferrin precursor        | I.PIGLLYCDLPEPR.K                                  | 2 | 4.97 | 0.37 |       |
| IPI00022463 | Serotransferrin precursor        | K.ADRDQYELLCLDNTR.K                                | 1 | 2.47 | 0.30 |       |
| IPI00022463 | Serotransferrin precursor        | K.ADRDQYELLCLDNTR.K                                | 2 | 4.69 | 0.38 |       |
| IPI00022463 | Serotransferrin precursor        | K.ADRDQYELLCLDNTR.K                                | 3 | 4.35 | 0.14 |       |
| IPI00022463 | Serotransferrin precursor        | K.ADRDQYELLCLDNTRKPVDEYK.D                         | 2 | 3.42 | 0.05 |       |
| IPI00022463 | Serotransferrin precursor        | K.ADRDQYELLCLDNTRKPVDEYK.D                         | 3 | 4.63 | 0.31 |       |
| IPI00022463 | Serotransferrin precursor        | K.ASYLDCIR.A                                       | 1 | 2.22 | 0.20 |       |
| IPI00022463 | Serotransferrin precursor        | K.ASYLDCIR.A                                       | 2 | 2.90 | 0.21 |       |
| IPI00022463 | Serotransferrin precursor        | K.AVANFFSGSCAPCADGTDFFPQLCQLCPGCGCSTLNQYFGYSGAFK.C | 3 | 5.36 | 0.47 |       |
| IPI00022463 | Serotransferrin precursor        | K.CDEWSVNSVGK.I                                    | 2 | 3.09 | 0.18 |       |
| IPI00022463 | Serotransferrin precursor        | K.CDEWSVNSVGKIECVSAETTEDCIAK.I                     | 3 | 4.79 | 0.41 |       |
| IPI00022463 | Serotransferrin precursor        | K.CGLVPVLAENYNKSDNCEDTPEAGYFAVAVVK.K               | 3 | 5.48 | 0.43 |       |
| IPI00022463 | Serotransferrin precursor        | K.CGLVPVLAENYNKSDNCEDTPEAGYFAVAVVK.S               | 3 | 4.90 | 0.46 |       |
| IPI00022463 | Serotransferrin precursor        | K.CLKDGAGDVAFVK.H                                  | 1 | 3.55 | 0.38 |       |
| IPI00022463 | Serotransferrin precursor        | K.CLKDGAGDVAFVK.H                                  | 2 | 4.53 | 0.42 |       |
| IPI00022463 | Serotransferrin precursor        | K.CLKDGAGDVAFVK.H                                  | 3 | 5.11 | 0.36 |       |
| IPI00022463 | Serotransferrin precursor        | K.CSTSSLLEACTFR.R                                  | 1 | 3.44 | 0.39 |       |
| IPI00022463 | Serotransferrin precursor        | K.CSTSSLLEACTFR.R                                  | 2 | 5.47 | 0.44 |       |
| IPI00022463 | Serotransferrin precursor        | K.CSTSSLLEACTFR.R                                  | 3 | 3.48 | 0.17 |       |
| IPI00022463 | Serotransferrin precursor        | K.DCHLAQVPSHTVVAR.S                                | 2 | 4.42 | 0.31 |       |

|             |                           |                                       |   |      |      |       |
|-------------|---------------------------|---------------------------------------|---|------|------|-------|
| IPI00022463 | Serotransferrin precursor | K.DCHLAQVPSHTVVAR.S                   | 3 | 3.94 | 0.35 |       |
| IPI00022463 | Serotransferrin precursor | K.DGAGDVAFVK.H                        | 1 | 2.34 | 0.13 |       |
| IPI00022463 | Serotransferrin precursor | K.DGAGDVAFVK.H                        | 2 | 3.46 | 0.26 | -3.05 |
| IPI00022463 | Serotransferrin precursor | K.DKSKEFQLFSSPHGK.D                   | 2 | 2.51 | 0.28 |       |
| IPI00022463 | Serotransferrin precursor | K.DKSKEFQLFSSPHGKDLLFK.D              | 2 | 6.23 | 0.42 |       |
| IPI00022463 | Serotransferrin precursor | K.DKSKEFQLFSSPHGKDLLFK.D              | 3 | 5.24 | 0.40 |       |
| IPI00022463 | Serotransferrin precursor | K.DLLFKDSAHGFLK.V                     | 1 | 3.62 | 0.41 |       |
| IPI00022463 | Serotransferrin precursor | K.DLLFKDSAHGFLK.V                     | 2 | 4.38 | 0.40 |       |
| IPI00022463 | Serotransferrin precursor | K.DLLFKDSAHGFLK.V                     | 3 | 3.49 | 0.26 |       |
| IPI00022463 | Serotransferrin precursor | K.DLLFKDSAHGFLKVPPR.M                 | 2 | 5.13 | 0.48 |       |
| IPI00022463 | Serotransferrin precursor | K.DLLFKDSAHGFLKVPPR.M                 | 3 | 5.34 | 0.41 |       |
| IPI00022463 | Serotransferrin precursor | K.DLLFKDSAHGFLKVPPRM*DAK.M            | 3 | 4.19 | 0.13 |       |
| IPI00022463 | Serotransferrin precursor | K.DLLFRDDTVCLAK.L                     | 1 | 3.27 | 0.33 |       |
| IPI00022463 | Serotransferrin precursor | K.DLLFRDDTVCLAK.L                     | 2 | 3.85 | 0.32 |       |
| IPI00022463 | Serotransferrin precursor | K.DLLFRDDTVCLAK.L                     | 3 | 3.82 | 0.32 |       |
| IPI00022463 | Serotransferrin precursor | K.DSAHGFLK.V                          | 1 | 2.44 | 0.24 |       |
| IPI00022463 | Serotransferrin precursor | K.DSAHGFLK.V                          | 2 | 2.40 | 0.15 |       |
| IPI00022463 | Serotransferrin precursor | K.DSAHGFLKVPPR.M                      | 1 | 3.52 | 0.21 |       |
| IPI00022463 | Serotransferrin precursor | K.DSAHGFLKVPPR.M                      | 2 | 3.23 | 0.23 |       |
| IPI00022463 | Serotransferrin precursor | K.DSAHGFLKVPPR.M                      | 3 | 4.65 | 0.18 |       |
| IPI00022463 | Serotransferrin precursor | K.DSAHGFLKVPPRM*DAK.M                 | 2 | 3.69 | 0.34 |       |
| IPI00022463 | Serotransferrin precursor | K.DSAHGFLKVPPRM*DAK.M                 | 3 | 2.58 | 0.18 |       |
| IPI00022463 | Serotransferrin precursor | K.DSGFQM*NQLR.G                       | 2 | 2.65 | 0.22 | -2.60 |
| IPI00022463 | Serotransferrin precursor | K.DSGFQM*NQLR.G                       | 1 | 2.50 | 0.17 |       |
| IPI00022463 | Serotransferrin precursor | K.DSGFQM*NQLR.G                       | 2 | 3.91 | 0.24 |       |
| IPI00022463 | Serotransferrin precursor | K.DSSLCKLCM*GSGLNLCEPNNK.E            | 3 | 4.68 | 0.27 |       |
| IPI00022463 | Serotransferrin precursor | K.DSSLCKLCM*GSGLNLCEPNNKEGYYGYTGAFR.C | 3 | 5.02 | 0.40 |       |
| IPI00022463 | Serotransferrin precursor | K.DSSLCKLCM*GSGLNLCEPNNKEGYYGYTGAFR.C | 3 | 3.70 | 0.21 |       |
| IPI00022463 | Serotransferrin precursor | K.DYELLCLDGTR.K                       | 1 | 2.92 | 0.22 |       |
| IPI00022463 | Serotransferrin precursor | K.DYELLCLDGTR.K                       | 2 | 4.14 | 0.40 |       |
| IPI00022463 | Serotransferrin precursor | K.DYELLCLDGTRKPVVEYANCHLAR.A          | 3 | 5.46 | 0.41 |       |
| IPI00022463 | Serotransferrin precursor | K.EDLIWELLNQAQEHFGK.D                 | 2 | 4.72 | 0.33 |       |
| IPI00022463 | Serotransferrin precursor | K.EDLIWELLNQAQEHFGK.D                 | 3 | 2.14 | 0.21 |       |
| IPI00022463 | Serotransferrin precursor | K.EDLIWELLNQAQEHFGKDK.S               | 2 | 4.78 | 0.43 |       |
| IPI00022463 | Serotransferrin precursor | K.EDLIWELLNQAQEHFGKDK.S               | 3 | 2.30 | 0.17 |       |
| IPI00022463 | Serotransferrin precursor | K.EDPQTFYYAVAVVK.K                    | 1 | 3.73 | 0.16 |       |
| IPI00022463 | Serotransferrin precursor | K.EDPQTFYYAVAVVK.K                    | 2 | 4.48 | 0.45 |       |
| IPI00022463 | Serotransferrin precursor | K.EDPQTFYYAVAVVK.K                    | 3 | 5.24 | 0.33 |       |
| IPI00022463 | Serotransferrin precursor | K.EDPQTFYYAVAVVKK.D                   | 1 | 3.33 | 0.15 |       |
| IPI00022463 | Serotransferrin precursor | K.EDPQTFYYAVAVVKK.D                   | 2 | 4.43 | 0.42 |       |
| IPI00022463 | Serotransferrin precursor | K.EFQLFSSPHGK.D                       | 1 | 3.05 | 0.29 |       |
| IPI00022463 | Serotransferrin precursor | K.EFQLFSSPHGK.D                       | 2 | 3.63 | 0.30 |       |

|             |                           |                                      |   |      |      |  |
|-------------|---------------------------|--------------------------------------|---|------|------|--|
| IPI00022463 | Serotransferrin precursor | K.EFQLFSSPHGKDLLFK.D                 | 2 | 5.05 | 0.33 |  |
| IPI00022463 | Serotransferrin precursor | K.EFQLFSSPHGKDLLFKDSAHGFLK.V         | 2 | 5.13 | 0.28 |  |
| IPI00022463 | Serotransferrin precursor | K.EFQLFSSPHGKDLLFKDSAHGFLK.V         | 3 | 6.53 | 0.38 |  |
| IPI00022463 | Serotransferrin precursor | K.EGYGYTGAFR.C                       | 1 | 2.71 | 0.37 |  |
| IPI00022463 | Serotransferrin precursor | K.EGYGYTGAFR.C                       | 2 | 3.44 | 0.40 |  |
| IPI00022463 | Serotransferrin precursor | K.GDVAFVKHQTPQNTGGK.N                | 2 | 4.66 | 0.33 |  |
| IPI00022463 | Serotransferrin precursor | K.GDVAFVKHQTPQNTGGK.N                | 3 | 4.60 | 0.30 |  |
| IPI00022463 | Serotransferrin precursor | K.GDVAFVKHQTPQNTGGKNPDPWAK.N         | 3 | 3.41 | 0.17 |  |
| IPI00022463 | Serotransferrin precursor | K.HQTPQNTGGK.N                       | 2 | 2.73 | 0.18 |  |
| IPI00022463 | Serotransferrin precursor | K.HSTIFENLANK.A                      | 1 | 3.58 | 0.34 |  |
| IPI00022463 | Serotransferrin precursor | K.HSTIFENLANK.A                      | 2 | 3.99 | 0.39 |  |
| IPI00022463 | Serotransferrin precursor | K.HSTIFENLANK.A                      | 3 | 4.47 | 0.21 |  |
| IPI00022463 | Serotransferrin precursor | K.HSTIFENLANKADR.D                   | 2 | 4.56 | 0.45 |  |
| IPI00022463 | Serotransferrin precursor | K.HSTIFENLANKADR.D                   | 3 | 4.65 | 0.42 |  |
| IPI00022463 | Serotransferrin precursor | K.HSTIFENLANKADRQYELLCLDNTR.K        | 2 | 3.87 | 0.38 |  |
| IPI00022463 | Serotransferrin precursor | K.HSTIFENLANKADRQYELLCLDNTR.K        | 3 | 4.88 | 0.43 |  |
| IPI00022463 | Serotransferrin precursor | K.HSTIFENLANKADRQYELLCLDNTRKPVDEYK.D | 3 | 4.62 | 0.35 |  |
| IPI00022463 | Serotransferrin precursor | K.IECVSAETTEDCIAK.I                  | 1 | 3.64 | 0.39 |  |
| IPI00022463 | Serotransferrin precursor | K.IECVSAETTEDCIAK.I                  | 2 | 5.60 | 0.44 |  |
| IPI00022463 | Serotransferrin precursor | K.IECVSAETTEDCIAK.I                  | 3 | 3.28 | 0.22 |  |
| IPI00022463 | Serotransferrin precursor | K.IM*NGEADAM*SLDGGFVYIAGK.C          | 2 | 6.64 | 0.54 |  |
| IPI00022463 | Serotransferrin precursor | K.IM*NGEADAM*SLDGGFVYIAGK.C          | 3 | 6.66 | 0.46 |  |
| IPI00022463 | Serotransferrin precursor | K.IM*NGEADAMSLDGGFVYIAGK.C           | 2 | 6.50 | 0.40 |  |
| IPI00022463 | Serotransferrin precursor | K.IM*NGEADAMSLDGGFVYIAGK.C           | 3 | 6.92 | 0.21 |  |
| IPI00022463 | Serotransferrin precursor | K.IMNGEADAM*SLDGGFVYIAGK.C           | 2 | 5.87 | 0.30 |  |
| IPI00022463 | Serotransferrin precursor | K.IMNGEADAMSLDGGFVYIAGK.C            | 2 | 5.46 | 0.48 |  |
| IPI00022463 | Serotransferrin precursor | K.IMNGEADAMSLDGGFVYIAGK.C            | 3 | 3.99 | 0.12 |  |
| IPI00022463 | Serotransferrin precursor | K.INHCRFDEFFSEGCAPGSK.K              | 2 | 4.50 | 0.34 |  |
| IPI00022463 | Serotransferrin precursor | K.INHCRFDEFFSEGCAPGSK.K              | 3 | 5.17 | 0.35 |  |
| IPI00022463 | Serotransferrin precursor | K.KASYLDCIR.A                        | 1 | 2.15 | 0.24 |  |
| IPI00022463 | Serotransferrin precursor | K.KASYLDCIR.A                        | 2 | 3.09 | 0.17 |  |
| IPI00022463 | Serotransferrin precursor | K.KDSGFQM*NQLR.G                     | 2 | 3.50 | 0.34 |  |
| IPI00022463 | Serotransferrin precursor | K.KDSGFQM*NQLR.G                     | 3 | 3.68 | 0.11 |  |
| IPI00022463 | Serotransferrin precursor | K.KSASDLTWDNLK.G                     | 1 | 2.83 | 0.21 |  |
| IPI00022463 | Serotransferrin precursor | K.KSASDLTWDNLK.G                     | 2 | 3.34 | 0.17 |  |
| IPI00022463 | Serotransferrin precursor | K.LCM*GSGLNLCEPNNK.E                 | 1 | 3.10 | 0.38 |  |
| IPI00022463 | Serotransferrin precursor | K.LCM*GSGLNLCEPNNK.E                 | 2 | 4.71 | 0.40 |  |
| IPI00022463 | Serotransferrin precursor | K.LCM*GSGLNLCEPNNK.E                 | 3 | 4.47 | 0.13 |  |
| IPI00022463 | Serotransferrin precursor | K.LCM*GSGLNLCEPNNKEGYGYTGAFR.C       | 2 | 4.02 | 0.45 |  |
| IPI00022463 | Serotransferrin precursor | K.LCM*GSGLNLCEPNNKEGYGYTGAFR.C       | 3 | 6.00 | 0.50 |  |
| IPI00022463 | Serotransferrin precursor | K.LCMGSGLNLCEPNNK.E                  | 2 | 4.18 | 0.40 |  |
| IPI00022463 | Serotransferrin precursor | K.LCMGSGLNLCEPNNKEGYGYTGAFR.C        | 2 | 4.13 | 0.44 |  |



|             |                           |                                            |   |      |      |       |
|-------------|---------------------------|--------------------------------------------|---|------|------|-------|
| IPI00022463 | Serotransferrin precursor | K.LCMGSGNLNCEPNKEGYGYTGAFR.C               | 3 | 5.65 | 0.49 |       |
| IPI00022463 | Serotransferrin precursor | K.LHDRNTYEK.Y                              | 2 | 2.90 | 0.22 |       |
| IPI00022463 | Serotransferrin precursor | K.LHDRNTYEKYLGEYVK.A                       | 2 | 4.85 | 0.42 |       |
| IPI00022463 | Serotransferrin precursor | K.LHDRNTYEKYLGEYVK.A                       | 3 | 5.29 | 0.27 |       |
| IPI00022463 | Serotransferrin precursor | K.M*YLGYEYVTAIR.N                          | 2 | 3.62 | 0.43 | -3.23 |
| IPI00022463 | Serotransferrin precursor | K.M*YLGYEYVTAIR.N                          | 3 | 4.11 | 0.27 |       |
| IPI00022463 | Serotransferrin precursor | K.MYLGYEYVTAIR.N                           | 1 | 2.50 | 0.33 |       |
| IPI00022463 | Serotransferrin precursor | K.MYLGYEYVTAIR.N                           | 2 | 4.77 | 0.51 |       |
| IPI00022463 | Serotransferrin precursor | K.MYLGYEYVTAIR.N                           | 3 | 4.25 | 0.21 |       |
| IPI00022463 | Serotransferrin precursor | K.NLNEKDYELLCLDGTR.K                       | 1 | 4.09 | 0.45 |       |
| IPI00022463 | Serotransferrin precursor | K.NLNEKDYELLCLDGTR.K                       | 2 | 5.45 | 0.49 |       |
| IPI00022463 | Serotransferrin precursor | K.NLNEKDYELLCLDGTR.K                       | 3 | 4.73 | 0.30 |       |
| IPI00022463 | Serotransferrin precursor | K.NLNEKDYELLCLDGTRKPVVEYANCHLAR.A          | 3 | 5.29 | 0.45 |       |
| IPI00022463 | Serotransferrin precursor | K.SASDLTWDNLK.G                            | 1 | 2.55 | 0.35 |       |
| IPI00022463 | Serotransferrin precursor | K.SASDLTWDNLK.G                            | 2 | 4.05 | 0.37 |       |
| IPI00022463 | Serotransferrin precursor | K.SASDLTWDNLK.G.K                          | 1 | 3.04 | 0.26 |       |
| IPI00022463 | Serotransferrin precursor | K.SASDLTWDNLK.G.K                          | 2 | 4.50 | 0.32 |       |
| IPI00022463 | Serotransferrin precursor | K.SDNCEDTPEAGYFAVAVVK.K                    | 2 | 5.62 | 0.51 |       |
| IPI00022463 | Serotransferrin precursor | K.SDNCEDTPEAGYFAVAVVK.K                    | 3 | 4.02 | 0.37 |       |
| IPI00022463 | Serotransferrin precursor | K.SDNCEDTPEAGYFAVAVVK.S                    | 2 | 5.16 | 0.46 |       |
| IPI00022463 | Serotransferrin precursor | K.SDNCEDTPEAGYFAVAVVK.S                    | 3 | 4.23 | 0.47 |       |
| IPI00022463 | Serotransferrin precursor | K.SKEFQLFSSPHGK.D                          | 1 | 2.23 | 0.41 |       |
| IPI00022463 | Serotransferrin precursor | K.SKEFQLFSSPHGK.D                          | 2 | 4.94 | 0.42 |       |
| IPI00022463 | Serotransferrin precursor | K.SKEFQLFSSPHGK.D                          | 3 | 4.19 | 0.35 |       |
| IPI00022463 | Serotransferrin precursor | K.SKEFQLFSSPHGKDLLFK.D                     | 2 | 4.96 | 0.36 |       |
| IPI00022463 | Serotransferrin precursor | K.SKEFQLFSSPHGKDLLFK.D                     | 3 | 4.78 | 0.22 |       |
| IPI00022463 | Serotransferrin precursor | K.SKEFQLFSSPHGKDLLFKDSAHGFLK.V             | 3 | 7.69 | 0.50 |       |
| IPI00022463 | Serotransferrin precursor | K.SVIPSDGPSVACVK.K                         | 1 | 2.77 | 0.31 |       |
| IPI00022463 | Serotransferrin precursor | K.SVIPSDGPSVACVK.K                         | 2 | 3.28 | 0.43 |       |
| IPI00022463 | Serotransferrin precursor | K.SVIPSDGPSVACVKK.A                        | 1 | 1.71 | 0.21 |       |
| IPI00022463 | Serotransferrin precursor | K.SVIPSDGPSVACVKK.A                        | 2 | 2.84 | 0.31 |       |
| IPI00022463 | Serotransferrin precursor | K.YLGEEYVK.A                               | 1 | 2.18 | 0.20 |       |
| IPI00022463 | Serotransferrin precursor | K.YLGEEYVK.A                               | 2 | 2.96 | 0.24 |       |
| IPI00022463 | Serotransferrin precursor | N.SVGKIECVSAETTEDCIAK.I                    | 2 | 6.35 | 0.47 |       |
| IPI00022463 | Serotransferrin precursor | R.AIAANEADAVTLDAGLVYDAYLAPNNLKPVVAEFYGSK.E | 3 | 7.40 | 0.56 |       |
| IPI00022463 | Serotransferrin precursor | R.APNHAVVTR.K                              | 1 | 2.54 | 0.24 |       |
| IPI00022463 | Serotransferrin precursor | R.APNHAVVTR.K                              | 2 | 3.09 | 0.42 |       |
| IPI00022463 | Serotransferrin precursor | R.CLVEKGDVAFVK.H                           | 1 | 3.66 | 0.38 |       |
| IPI00022463 | Serotransferrin precursor | R.CLVEKGDVAFVK.H                           | 2 | 4.45 | 0.42 |       |
| IPI00022463 | Serotransferrin precursor | R.CLVEKGDVAFVK.H                           | 3 | 4.32 | 0.41 |       |
| IPI00022463 | Serotransferrin precursor | R.CLVEKGDVAFVKHQTVPQNTGGK.N                | 3 | 5.92 | 0.44 |       |
| IPI00022463 | Serotransferrin precursor | R.DDTVCLAK.L                               | 1 | 1.75 | 0.12 |       |

|             |                           |                                        |   |      |      |
|-------------|---------------------------|----------------------------------------|---|------|------|
| IPI00022463 | Serotransferrin precursor | R.DQYELLCLDNTR.K                       | 2 | 4.93 | 0.27 |
| IPI00022463 | Serotransferrin precursor | R.DQYELLCLDNTR.K                       | 3 | 3.42 | 0.19 |
| IPI00022463 | Serotransferrin precursor | R.DQYELLCLDNTRKPVDEYKDCHLAQVPSHTVVAR.S | 3 | 5.14 | 0.42 |
| IPI00022463 | Serotransferrin precursor | R.EGTCPEAPTDECKPVK.W                   | 1 | 2.79 | 0.34 |
| IPI00022463 | Serotransferrin precursor | R.EGTCPEAPTDECKPVK.W                   | 2 | 3.97 | 0.30 |
| IPI00022463 | Serotransferrin precursor | R.FDEFFSEGCAPGSK.K                     | 1 | 2.92 | 0.39 |
| IPI00022463 | Serotransferrin precursor | R.FDEFFSEGCAPGSK.K                     | 2 | 4.88 | 0.47 |
| IPI00022463 | Serotransferrin precursor | R.FDEFFSEGCAPGSK.K                     | 3 | 4.04 | 0.19 |
| IPI00022463 | Serotransferrin precursor | R.FDEFFSEGCAPGSKK.D                    | 1 | 3.07 | 0.36 |
| IPI00022463 | Serotransferrin precursor | R.FDEFFSEGCAPGSKK.D                    | 2 | 4.43 | 0.44 |
| IPI00022463 | Serotransferrin precursor | R.FDEFFSEGCAPGSKK.D                    | 3 | 3.58 | 0.34 |
| IPI00022463 | Serotransferrin precursor | R.FDEFFSEGCAPGSKKDSLCK.L               | 2 | 4.10 | 0.28 |
| IPI00022463 | Serotransferrin precursor | R.KCSTSSLLEACTFR.R                     | 1 | 2.79 | 0.50 |
| IPI00022463 | Serotransferrin precursor | R.KCSTSSLLEACTFR.R                     | 2 | 4.86 | 0.47 |
| IPI00022463 | Serotransferrin precursor | R.KCSTSSLLEACTFR.R                     | 3 | 3.98 | 0.19 |
| IPI00022463 | Serotransferrin precursor | R.KPVDEYKDCHLAQVPSHTVVAR.S             | 3 | 6.08 | 0.36 |
| IPI00022463 | Serotransferrin precursor | R.LKCDEWSVNSVGK.I                      | 1 | 3.40 | 0.33 |
| IPI00022463 | Serotransferrin precursor | R.LKCDEWSVNSVGK.I                      | 2 | 4.83 | 0.34 |
| IPI00022463 | Serotransferrin precursor | R.LKCDEWSVNSVGK.I                      | 3 | 4.71 | 0.27 |
| IPI00022463 | Serotransferrin precursor | R.LKCDEWSVNSVGKIECVSAETTEDCIAK.I       | 2 | 4.35 | 0.55 |
| IPI00022463 | Serotransferrin precursor | R.LKCDEWSVNSVGKIECVSAETTEDCIAK.I       | 3 | 7.45 | 0.52 |
| IPI00022463 | Serotransferrin precursor | R.NLREGTCPEAPTDECKPVK.W                | 2 | 5.48 | 0.41 |
| IPI00022463 | Serotransferrin precursor | R.NLREGTCPEAPTDECKPVK.W                | 3 | 5.92 | 0.32 |
| IPI00022463 | Serotransferrin precursor | R.NTYEKYLGEYVK.A                       | 1 | 3.75 | 0.33 |
| IPI00022463 | Serotransferrin precursor | R.NTYEKYLGEYVK.A                       | 2 | 4.01 | 0.32 |
| IPI00022463 | Serotransferrin precursor | R.NTYEKYLGEYVK.A                       | 3 | 3.42 | 0.18 |
| IPI00022463 | Serotransferrin precursor | R.QQHLFGSNVTDCSGNFCLFR.S               | 2 | 3.97 | 0.41 |
| IPI00022463 | Serotransferrin precursor | R.QQHLFGSNVTDCSGNFCLFR.S               | 3 | 4.10 | 0.30 |
| IPI00022463 | Serotransferrin precursor | R.SAGWNIPIGLLYCDLPEPR.K                | 2 | 5.67 | 0.45 |
| IPI00022463 | Serotransferrin precursor | R.SAGWNIPIGLLYCDLPEPR.K                | 3 | 5.39 | 0.40 |
| IPI00022463 | Serotransferrin precursor | R.SETKDLLFR.D                          | 1 | 2.29 | 0.16 |
| IPI00022463 | Serotransferrin precursor | R.SETKDLLFR.D                          | 2 | 2.87 | 0.15 |
| IPI00022463 | Serotransferrin precursor | R.SETKDLLFRDDTVCLAK.L                  | 2 | 4.77 | 0.37 |
| IPI00022463 | Serotransferrin precursor | R.SETKDLLFRDDTVCLAK.L                  | 3 | 4.22 | 0.24 |
| IPI00022463 | Serotransferrin precursor | R.SM*GGKEDLIWELLNQAQEHFGK.D            | 2 | 5.35 | 0.43 |
| IPI00022463 | Serotransferrin precursor | R.SM*GGKEDLIWELLNQAQEHFGK.D            | 3 | 5.80 | 0.33 |
| IPI00022463 | Serotransferrin precursor | R.SM*GGKEDLIWELLNQAQEHFGKDK.S          | 2 | 4.12 | 0.39 |
| IPI00022463 | Serotransferrin precursor | R.SM*GGKEDLIWELLNQAQEHFGKDK.S          | 3 | 5.39 | 0.32 |
| IPI00022463 | Serotransferrin precursor | R.SMGGKEDLIWELLNQAQEHFGKDK.S           | 2 | 4.36 | 0.25 |
| IPI00022463 | Serotransferrin precursor | R.SMGGKEDLIWELLNQAQEHFGKDK.S           | 3 | 6.16 | 0.40 |
| IPI00022463 | Serotransferrin precursor | R.TAGWNIPM*GLLYNK.I                    | 1 | 3.32 | 0.23 |
| IPI00022463 | Serotransferrin precursor | R.TAGWNIPM*GLLYNK.I                    | 2 | 4.54 | 0.37 |

|             |                           |                                        |   |      |      |       |
|-------------|---------------------------|----------------------------------------|---|------|------|-------|
| IPI00022463 | Serotransferrin precursor | R.TAGWNIPM*GLLYNK.I                    | 3 | 3.93 | 0.34 |       |
| IPI00022463 | Serotransferrin precursor | R.TAGWNIPMGLLYNK.I                     | 2 | 4.30 | 0.31 |       |
| IPI00022463 | Serotransferrin precursor | R.TAGWNIPMGLLYNK.I                     | 3 | 3.59 | 0.20 |       |
| IPI00022463 | Serotransferrin precursor | R.WCAVSEHEATK.C                        | 1 | 2.83 | 0.36 |       |
| IPI00022463 | Serotransferrin precursor | R.WCAVSEHEATK.C                        | 2 | 4.09 | 0.30 |       |
| IPI00022463 | Serotransferrin precursor | R.WCAVSEHEATK.C                        | 3 | 2.96 | 0.18 |       |
| IPI00022463 | Serotransferrin precursor | R.WCAVSEHEATKCSFR.D                    | 3 | 3.47 | 0.27 |       |
| IPI00022463 | Serotransferrin precursor | Y.LAPNLIKPVVAEFYGSKEDPQTFYYAVAVVK.K    | 3 | 5.74 | 0.39 |       |
| IPI00022488 | Hemopexin precursor       | A.HGNVAEGETKPPDPVTER.C                 | 3 | 4.38 | 0.43 | -3.49 |
| IPI00022488 | Hemopexin precursor       | A.TPLPPTSAHGNVAEGETKPPDPVTER.C         | 2 | 3.93 | 0.48 | -3.66 |
| IPI00022488 | Hemopexin precursor       | D.PVRGEVPPR.Y                          | 2 | 3.28 | 0.22 | -0.70 |
| IPI00022488 | Hemopexin precursor       | F.PGIPSPLDAAVECHR.G                    | 2 | 3.77 | 0.46 | -1.24 |
| IPI00022488 | Hemopexin precursor       | F.PSPVDAAFR.Q                          | 1 | 2.74 | 0.17 | -2.68 |
| IPI00022488 | Hemopexin precursor       | G.NVAEGETKPPDPVTER.C                   | 2 | 3.82 | 0.41 | -3.71 |
| IPI00022488 | Hemopexin precursor       | I.PSPLDAAVECHR.G                       | 1 | 2.40 | 0.26 | -2.78 |
| IPI00022488 | Hemopexin precursor       | I.PSPLDAAVECHR.G                       | 2 | 3.29 | 0.43 | -3.75 |
| IPI00022488 | Hemopexin precursor       | K.ALQPQNVTSLGCTH.-                     | 2 | 2.74 | 0.37 | -3.21 |
| IPI00022488 | Hemopexin precursor       | K.EVGTPHGIILDSVDAAFICPGSSR.L           | 2 | 6.05 | 0.53 | -5.65 |
| IPI00022488 | Hemopexin precursor       | K.EVGTPHGIILDSVDAAFICPGSSR.L           | 3 | 6.16 | 0.47 | -7.12 |
| IPI00022488 | Hemopexin precursor       | K.GDKVWVYPPEK.K                        | 2 | 3.04 | 0.35 |       |
| IPI00022488 | Hemopexin precursor       | K.GDKVWVYPPEK.K                        | 3 | 2.87 | 0.06 | -3.66 |
| IPI00022488 | Hemopexin precursor       | K.GDKVWVYPPEK.E                        | 2 | 3.61 | 0.34 | -4.41 |
| IPI00022488 | Hemopexin precursor       | K.GDKVWVYPPEK.E                        | 3 | 3.15 | 0.18 | -4.10 |
| IPI00022488 | Hemopexin precursor       | K.GGYTLVSGYPK.R                        | 1 | 2.88 | 0.33 | -2.78 |
| IPI00022488 | Hemopexin precursor       | K.GGYTLVSGYPK.R                        | 2 | 3.92 | 0.37 | -5.42 |
| IPI00022488 | Hemopexin precursor       | K.GGYTLVSGYPK.L                        | 2 | 2.68 | 0.27 | -2.83 |
| IPI00022488 | Hemopexin precursor       | K.GGYTLVSGYPK.L                        | 3 | 2.15 | 0.25 | -2.07 |
| IPI00022488 | Hemopexin precursor       | K.GGYTLVSGYPKLEK.E                     | 2 | 3.72 | 0.27 | -4.38 |
| IPI00022488 | Hemopexin precursor       | K.GGYTLVSGYPKLEK.E                     | 3 | 1.93 | 0.24 | -4.07 |
| IPI00022488 | Hemopexin precursor       | K.LLQDEFPGIPSPLDAAVECHR.G              | 2 | 5.26 | 0.36 | -3.83 |
| IPI00022488 | Hemopexin precursor       | K.LLQDEFPGIPSPLDAAVECHR.G              | 3 | 3.60 | 0.20 | -3.50 |
| IPI00022488 | Hemopexin precursor       | K.LLQDEFPGIPSPLDAAVECHRGECAEGLFFQGDR.E | 3 | 4.20 | 0.44 | -2.30 |
| IPI00022488 | Hemopexin precursor       | K.LLQDEFPGIPSPLDAAVECHRGECAEGLFFQGDR.E | 4 | 3.78 | 0.32 | -2.32 |
| IPI00022488 | Hemopexin precursor       | K.LYLQGTQVYVFLTK.G                     | 2 | 5.43 | 0.51 | -6.64 |
| IPI00022488 | Hemopexin precursor       | K.LYLQGTQVYVFLTK.G                     | 3 | 5.04 | 0.50 | -7.96 |
| IPI00022488 | Hemopexin precursor       | K.NFSPVDAAFR.Q                         | 1 | 2.62 | 0.32 | -3.24 |
| IPI00022488 | Hemopexin precursor       | K.NFSPVDAAFR.Q                         | 2 | 2.76 | 0.28 | -3.53 |
| IPI00022488 | Hemopexin precursor       | K.RLEKEVGTPHGIILDSVDAAFICPGSSR.L       | 3 | 6.22 | 0.56 | -3.52 |
| IPI00022488 | Hemopexin precursor       | K.RLEKEVGTPHGIILDSVDAAFICPGSSR.L       | 5 | 3.06 | 0.08 | -3.19 |
| IPI00022488 | Hemopexin precursor       | K.SGAQATWTELPWPHEK.V                   | 2 | 4.55 | 0.43 | -4.65 |
| IPI00022488 | Hemopexin precursor       | K.SGAQATWTELPWPHEK.V                   | 3 | 4.61 | 0.52 | -3.59 |
| IPI00022488 | Hemopexin precursor       | K.SGAQATWTELPWPHEKVDGALCM*EK.S         | 2 | 2.98 | 0.46 | -4.62 |

|             |                     |                                         |   |      |      |       |
|-------------|---------------------|-----------------------------------------|---|------|------|-------|
| IPI00022488 | Hemopexin precursor | K.SGAQATWTELPWPHEKVDGALCM*EK.S          | 3 | 4.96 | 0.60 | -5.03 |
| IPI00022488 | Hemopexin precursor | K.SGAQATWTELPWPHEKVDGALCM*EK.S          | 4 | 3.86 | 0.35 | -4.42 |
| IPI00022488 | Hemopexin precursor | K.SGAQATWTELPWPHEKVDGALCMEK.S           | 2 | 3.55 | 0.27 |       |
| IPI00022488 | Hemopexin precursor | K.SGAQATWTELPWPHEKVDGALCMEK.S           | 3 | 4.72 | 0.46 |       |
| IPI00022488 | Hemopexin precursor | K.SLGPNSCSANGPGLYLIHGPNLYCYSVDEK.L      | 2 | 3.62 | 0.45 | -2.60 |
| IPI00022488 | Hemopexin precursor | K.SLGPNSCSANGPGLYLIHGPNLYCYSVDEK.L      | 3 | 5.13 | 0.52 | -4.17 |
| IPI00022488 | Hemopexin precursor | K.SLGPNSCSANGPGLYLIHGPNLYCYSVDEK.L      | 4 | 5.04 | 0.44 | -3.37 |
| IPI00022488 | Hemopexin precursor | K.SLGPNSCSANGPGLYLIHGPNLYCYSVDEKLNAAK.A | 3 | 4.22 | 0.39 | -2.83 |
| IPI00022488 | Hemopexin precursor | K.SLGPNSCSANGPGLYLIHGPNLYCYSVDEKLNAAK.A | 4 | 4.23 | 0.37 | -3.08 |
| IPI00022488 | Hemopexin precursor | K.VDGALCM*EK.S                          | 1 | 1.41 | 0.15 | -4.75 |
| IPI00022488 | Hemopexin precursor | K.VDGALCM*EK.S                          | 2 | 3.15 | 0.30 | -2.54 |
| IPI00022488 | Hemopexin precursor | K.VDGALCMEK.S                           | 2 | 2.11 | 0.22 |       |
| IPI00022488 | Hemopexin precursor | L.PPTSAHGNAEGETKPPDPVTER.C              | 2 | 4.36 | 0.43 | -4.25 |
| IPI00022488 | Hemopexin precursor | L.PPTSAHGNAEGETKPPDPVTER.C              | 3 | 4.61 | 0.47 | -5.32 |
| IPI00022488 | Hemopexin precursor | L.PPTSAHGNAEGETKPPDPVTER.C              | 4 | 5.54 | 0.47 | -1.79 |
| IPI00022488 | Hemopexin precursor | N.FPSPVDAAFR.Q                          | 1 | 2.29 | 0.35 | -3.62 |
| IPI00022488 | Hemopexin precursor | N.FPSPVDAAFR.Q                          | 2 | 3.05 | 0.34 | -2.10 |
| IPI00022488 | Hemopexin precursor | N.VAEGETKPPDPVTER.C                     | 2 | 4.03 | 0.31 | -4.00 |
| IPI00022488 | Hemopexin precursor | P.LPPTSAHGNAEGETKPPDPVTER.C             | 2 | 4.30 | 0.41 | -3.37 |
| IPI00022488 | Hemopexin precursor | P.LPPTSAHGNAEGETKPPDPVTER.C             | 3 | 4.10 | 0.50 | -3.49 |
| IPI00022488 | Hemopexin precursor | P.TSAHGNAEGETKPPDPVTER.C                | 2 | 5.17 | 0.56 | -5.39 |
| IPI00022488 | Hemopexin precursor | Q.GHNSVFLIK.G                           | 1 | 2.33 | 0.20 | -4.62 |
| IPI00022488 | Hemopexin precursor | Q.GHNSVFLIKGDK.V                        | 2 | 3.21 | 0.45 | -3.35 |
| IPI00022488 | Hemopexin precursor | R.CSPHLVLSALTSNDHGATYAFSGTHYWR.L        | 3 | 6.61 | 0.51 |       |
| IPI00022488 | Hemopexin precursor | R.DGWHSWPIAHQWPQGPSAVDAAFSWEEK.L        | 2 | 4.43 | 0.45 |       |
| IPI00022488 | Hemopexin precursor | R.DGWHSWPIAHQWPQGPSAVDAAFSWEEK.L        | 3 | 4.60 | 0.20 |       |
| IPI00022488 | Hemopexin precursor | R.DVRDYFM*PCPGR.G                       | 2 | 2.55 | 0.31 | -3.46 |
| IPI00022488 | Hemopexin precursor | R.DVRDYFM*PCPGR.G                       | 3 | 2.92 | 0.20 | -1.92 |
| IPI00022488 | Hemopexin precursor | R.DVRDYFMPCPGR.G                        | 2 | 2.84 | 0.09 |       |
| IPI00022488 | Hemopexin precursor | R.DYFM*PCPGR.G                          | 2 | 2.93 | 0.28 | -4.51 |
| IPI00022488 | Hemopexin precursor | R.DYFMPCPGR.G                           | 2 | 2.96 | 0.18 |       |
| IPI00022488 | Hemopexin precursor | R.EWFWDLATGTM*K.E                       | 1 | 2.68 | 0.52 | -2.50 |
| IPI00022488 | Hemopexin precursor | R.EWFWDLATGTM*K.E                       | 2 | 3.95 | 0.49 | -3.35 |
| IPI00022488 | Hemopexin precursor | R.EWFWDLATGTM*KER.S                     | 3 | 2.26 | 0.24 | -1.42 |
| IPI00022488 | Hemopexin precursor | R.EWFWDLATGTMKER.S                      | 2 | 3.04 | 0.42 | -2.98 |
| IPI00022488 | Hemopexin precursor | R.EWFWDLATGTMKER.S                      | 3 | 2.04 | 0.21 | -3.19 |
| IPI00022488 | Hemopexin precursor | R.FDPVRGEVPPR.Y                         | 2 | 1.71 | 0.10 | -2.16 |
| IPI00022488 | Hemopexin precursor | R.FDPVRGEVPPR.Y                         | 3 | 1.87 | 0.29 | -4.23 |
| IPI00022488 | Hemopexin precursor | R.FDPVRGEVPPRYPR.D                      | 2 | 1.40 | 0.27 | -2.89 |
| IPI00022488 | Hemopexin precursor | R.GECQAEGVLFQGDRE                       | 2 | 3.48 | 0.11 |       |
| IPI00022488 | Hemopexin precursor | R.GECQAEGVLFQGDREWFWDLATGTM*K.E         | 3 | 5.87 | 0.63 | -4.16 |
| IPI00022488 | Hemopexin precursor | R.GECQAEGVLFQGDREWFWDLATGTMK.E          | 3 | 5.42 | 0.46 |       |

|             |                                                                         |                                  |   |      |      |       |
|-------------|-------------------------------------------------------------------------|----------------------------------|---|------|------|-------|
| IPI00022488 | Hemopexin precursor                                                     | R.GEVPPRYPR.D                    | 2 | 2.41 | 0.16 |       |
| IPI00022488 | Hemopexin precursor                                                     | R.LEKEVGTPHGIILDSVDAAFICPGSSR.L  | 4 | 3.85 | 0.24 | -1.68 |
| IPI00022488 | Hemopexin precursor                                                     | R.LWWLDLK.S                      | 1 | 2.00 | 0.06 |       |
| IPI00022488 | Hemopexin precursor                                                     | R.LWWLDLK.S                      | 2 | 2.01 | 0.05 | -0.24 |
| IPI00022488 | Hemopexin precursor                                                     | R.QGHNSVFLIK.G                   | 1 | 1.88 | 0.06 | -5.11 |
| IPI00022488 | Hemopexin precursor                                                     | R.SWPAVGNCSALR.W                 | 2 | 3.51 | 0.39 | -3.76 |
| IPI00022488 | Hemopexin precursor                                                     | R.WKNFSPVDAAFR.Q                 | 2 | 2.35 | 0.28 | -3.16 |
| IPI00022488 | Hemopexin precursor                                                     | R.WKNFSPVDAAFR.Q                 | 3 | 4.00 | 0.39 | -3.66 |
| IPI00022488 | Hemopexin precursor                                                     | R.YYCFQGNQFLR.F                  | 1 | 3.44 | 0.40 | -2.43 |
| IPI00022488 | Hemopexin precursor                                                     | R.YYCFQGNQFLR.F                  | 2 | 3.82 | 0.45 | -5.30 |
| IPI00022488 | Hemopexin precursor                                                     | R.YYCFQGNQFLR.F                  | 3 | 4.93 | 0.36 | -2.71 |
| IPI00022488 | Hemopexin precursor                                                     | S.PLDAAVECHR.G                   | 2 | 3.28 | 0.46 | -2.55 |
| IPI00022488 | Hemopexin precursor                                                     | T.SAHGNVAEGETKPPDVTER.C          | 3 | 3.61 | 0.39 | -3.06 |
| IPI00022488 | Hemopexin precursor                                                     | W.KNFSPVDAAFR.Q                  | 3 | 4.28 | 0.42 | -2.86 |
| IPI00022488 | Hemopexin precursor                                                     | W.PHEKVDGALCM*EK.S               | 2 | 3.64 | 0.33 | -3.15 |
| IPI00022488 | Hemopexin precursor                                                     | W.PQGSAVDAAFSWEEK.L              | 2 | 4.81 | 0.53 | -2.18 |
| IPI00022488 | Hemopexin precursor                                                     | Y.CYSDVEKLNAAK.A                 | 2 | 4.02 | 0.38 | 0.26  |
| IPI00022488 | Hemopexin precursor                                                     | Y.YCFQGNQFLR.F                   | 2 | 3.06 | 0.25 | -1.63 |
| IPI00022542 | Rho-associated protein kinase 1                                         | K.QCSMLDVLK.Q                    | 2 | 2.65 | 0.07 |       |
| IPI00022606 | Isoform 1 of Proline-serine-threonine phosphatase-interacting protein 1 | K.TYEQKCR.D                      | 2 | 2.01 | 0.20 |       |
| IPI00022608 | Sortilin-related receptor precursor                                     | K.GGTWEFLQAPAFYGEK.I             | 2 | 4.13 | 0.40 |       |
| IPI00022608 | Sortilin-related receptor precursor                                     | K.IEVANPDGDFR.L                  | 2 | 3.58 | 0.14 |       |
| IPI00022608 | Sortilin-related receptor precursor                                     | K.M*SEDLSEVCVPDPEFSGK.S          | 2 | 2.52 | 0.24 |       |
| IPI00022608 | Sortilin-related receptor precursor                                     | K.NLLVNTLYTVR.V                  | 2 | 2.89 | 0.22 | -0.50 |
| IPI00022608 | Sortilin-related receptor precursor                                     | K.SYSPVPCPVGSTYR.R               | 2 | 2.50 | 0.26 |       |
| IPI00022608 | Sortilin-related receptor precursor                                     | K.TDLGDSPLAFEHVM*TR.G            | 3 | 1.99 | 0.11 | -2.15 |
| IPI00022608 | Sortilin-related receptor precursor                                     | K.TNVYISSAGAR.W                  | 2 | 3.35 | 0.36 |       |
| IPI00022608 | Sortilin-related receptor precursor                                     | R.GFLVVQGDPR.E                   | 2 | 3.59 | 0.29 | -1.03 |
| IPI00022608 | Sortilin-related receptor precursor                                     | R.LEGELVPCPLAEENEFILYAVR.K       | 2 | 3.63 | 0.13 |       |
| IPI00022608 | Sortilin-related receptor precursor                                     | R.LHGGSAPLQDR.G                  | 2 | 2.42 | 0.10 | -0.39 |
| IPI00022608 | Sortilin-related receptor precursor                                     | R.NCPTTICDLDTQFR.C               | 2 | 2.51 | 0.22 |       |
| IPI00022608 | Sortilin-related receptor precursor                                     | R.VVVPYQGSSDYVVVK.M              | 2 | 2.60 | 0.17 | -3.74 |
| IPI00022640 | Neurogranin                                                             | K.GPGPGGGGAGVAR.G                | 2 | 2.26 | 0.12 | -1.31 |
| IPI00022640 | Neurogranin                                                             | R.KGPGPGGGGAGVAR.G               | 2 | 3.48 | 0.46 | -4.24 |
| IPI00022640 | Neurogranin                                                             | R.KGPGPGGGGAGVAR.G               | 3 | 3.41 | 0.31 | -3.02 |
| IPI00022649 | Isoform 1 of Solute carrier family 12 member 2                          | R.AAAAAAAAAAAAAAGAGAK.Q          | 2 | 4.79 | 0.33 | -2.74 |
| IPI00022649 | Isoform 1 of Solute carrier family 12 member 2                          | R.DGGGVRDEGPAAGDGLGRPLGPTPSQSR.F | 4 | 2.39 | 0.17 | -0.13 |
| IPI00022649 | Isoform 1 of Solute carrier family 12 member 2                          | R.VELPGTAVPSVPEDAAPASR.D         | 2 | 4.18 | 0.56 | -4.94 |
| IPI00022674 | Isoform 1 of Oncostatin-M specific receptor subunit beta precursor      | K.GIVLFVSK.V                     | 2 | 2.24 | 0.12 | -1.25 |

|             |                                                                    |                                             |   |      |      |       |
|-------------|--------------------------------------------------------------------|---------------------------------------------|---|------|------|-------|
| IPI00022674 | Isoform 1 of Oncostatin-M specific receptor subunit beta precursor | K.QIHGEQLDPHVTAFLNLSVPPFIR.N                | 4 | 2.64 | 0.11 | -4.10 |
| IPI00022674 | Isoform 1 of Oncostatin-M specific receptor subunit beta precursor | K.QPSQSYTLFESFSGEK.K                        | 2 | 2.99 | 0.11 | -4.56 |
| IPI00022774 | Transitional endoplasmic reticulum ATPase                          | K.MDLIDLEDETIDAEVMNSLAVTMDDFR.W             | 3 | 3.00 | 0.32 | -2.25 |
| IPI00022774 | Transitional endoplasmic reticulum ATPase                          | R.KKMDLIDLEDETIDAEVMNSLAVTMDDFR.W           | 3 | 4.18 | 0.44 | -1.51 |
| IPI00022774 | Transitional endoplasmic reticulum ATPase                          | R.KKMDLIDLEDETIDAEVMNSLAVTMDDFR.W           | 4 | 2.92 | 0.21 | -1.62 |
| IPI00022774 | Transitional endoplasmic reticulum ATPase                          | R.QTNPSAMEVEEDDPVPEIRRDHFEEAMR.F            | 3 | 2.74 | 0.18 | -6.81 |
| IPI00022792 | Microfibril-associated glycoprotein 4 precursor                    | K.FSTFDRDQDLFVQNCAALSSGAFWFR.S              | 3 | 5.78 | 0.51 | -3.18 |
| IPI00022792 | Microfibril-associated glycoprotein 4 precursor                    | K.FSTFDRDQDLFVQNCAALSSGAFWFR.S              | 4 | 2.97 | 0.16 | -1.02 |
| IPI00022792 | Microfibril-associated glycoprotein 4 precursor                    | K.GFYYSLK.R                                 | 1 | 1.73 | 0.17 | -2.49 |
| IPI00022792 | Microfibril-associated glycoprotein 4 precursor                    | K.GFYYSLK.R                                 | 2 | 2.32 | 0.18 | -1.24 |
| IPI00022792 | Microfibril-associated glycoprotein 4 precursor                    | K.GFYYSLK.R.T                               | 2 | 2.41 | 0.26 | -0.59 |
| IPI00022792 | Microfibril-associated glycoprotein 4 precursor                    | K.YADFSISPNVSAEEDGYTLFVAGFEDGGAGDLSYHSGQK.F | 3 | 6.16 | 0.61 | -1.80 |
| IPI00022792 | Microfibril-associated glycoprotein 4 precursor                    | K.YADFSISPNVSAEEDGYTLFVAGFEDGGAGDLSYHSGQK.F | 4 | 4.81 | 0.44 | -3.79 |
| IPI00022792 | Microfibril-associated glycoprotein 4 precursor                    | R.ADGEYWLGLQNM*HLLTLK.Q                     | 2 | 3.78 | 0.42 | -2.15 |
| IPI00022792 | Microfibril-associated glycoprotein 4 precursor                    | R.ADGEYWLGLQNM*HLLTLK.Q                     | 3 | 3.26 | 0.40 | -3.58 |
| IPI00022792 | Microfibril-associated glycoprotein 4 precursor                    | R.ADGEYWLGLQNMHLLTLK.Q                      | 3 | 3.20 | 0.18 |       |
| IPI00022792 | Microfibril-associated glycoprotein 4 precursor                    | W.LGLQNM*HLLTLK.Q                           | 3 | 3.69 | 0.34 | -0.50 |
| IPI00022810 | Dipeptidyl-peptidase 1 precursor                                   | K.KVGTASENVYVNTAHLK.N                       | 3 | 3.77 | 0.44 | -2.55 |
| IPI00022810 | Dipeptidyl-peptidase 1 precursor                                   | K.KVVVYLQK.L                                | 2 | 1.84 | 0.19 | -2.47 |
| IPI00022810 | Dipeptidyl-peptidase 1 precursor                                   | K.PAPLTAEIQQK.I                             | 2 | 2.92 | 0.27 | -2.49 |
| IPI00022810 | Dipeptidyl-peptidase 1 precursor                                   | K.VGTASENVYVNTAHLK.N                        | 2 | 4.09 | 0.35 | -3.94 |
| IPI00022810 | Dipeptidyl-peptidase 1 precursor                                   | K.VGTASENVYVNTAHLK.N                        | 3 | 2.72 | 0.37 | -4.04 |
| IPI00022810 | Dipeptidyl-peptidase 1 precursor                                   | K.VVVYLQK.L                                 | 2 | 2.53 | 0.14 | -2.67 |
| IPI00022810 | Dipeptidyl-peptidase 1 precursor                                   | K.YDHNFK.A                                  | 2 | 2.11 | 0.19 | -3.54 |
| IPI00022810 | Dipeptidyl-peptidase 1 precursor                                   | R.NVHGINFVSPVR.N                            | 2 | 2.74 | 0.42 | -2.36 |
| IPI00022810 | Dipeptidyl-peptidase 1 precursor                                   | R.NVHGINFVSPVR.N                            | 3 | 3.66 | 0.22 | -3.25 |
| IPI00022810 | Dipeptidyl-peptidase 1 precursor                                   | W.VFQVGSSGSQR.D                             | 2 | 3.03 | 0.30 | -1.65 |
| IPI00022822 | Isoform 2 of Collagen alpha-1(XVIII) chain precursor               | K.LSGVQDGHQDISLLYTEPGAGQHTAASFR.L           | 3 | 5.33 | 0.48 | -3.06 |
| IPI00022822 | Isoform 2 of Collagen alpha-1(XVIII) chain precursor               | R.AAVPIVNLKDELLFPSWEALFSGSEGPLKPGAR.I       | 3 | 5.34 | 0.54 | -3.88 |
| IPI00022822 | Isoform 2 of Collagen alpha-1(XVIII) chain precursor               | R.AAVPIVNLKDELLFPSWEALFSGSEGPLKPGAR.I       | 4 | 4.04 | 0.38 | -3.43 |
| IPI00022822 | Isoform 2 of Collagen alpha-1(XVIII) chain precursor               | R.AVGLAGTFR.A                               | 2 | 2.59 | 0.21 | -4.65 |
| IPI00022822 | Isoform 2 of Collagen alpha-1(XVIII) chain precursor               | R.DFQPVLHLVALNSPLSGGM*R.G                   | 2 | 5.49 | 0.56 | -2.74 |
| IPI00022822 | Isoform 2 of Collagen alpha-1(XVIII) chain precursor               | R.DFQPVLHLVALNSPLSGGM*R.G                   | 3 | 5.04 | 0.35 | -3.92 |

|             |                                                      |                                  |   |      |      |       |
|-------------|------------------------------------------------------|----------------------------------|---|------|------|-------|
| IPI00022822 | Isoform 2 of Collagen alpha-1(XVIII) chain precursor | R.ELLREETGAALKPR.L               | 2 | 3.54 | 0.12 | -3.32 |
| IPI00022822 | Isoform 2 of Collagen alpha-1(XVIII) chain precursor | R.ELLREETGAALKPR.L               | 3 | 4.46 | 0.32 | -1.36 |
| IPI00022822 | Isoform 2 of Collagen alpha-1(XVIII) chain precursor | R.GADFQCFQQR.A                   | 2 | 3.38 | 0.35 | -3.45 |
| IPI00022822 | Isoform 2 of Collagen alpha-1(XVIII) chain precursor | R.GLELEPGAGLFVAQAGGADPDKFQGVIK.V | 2 | 2.91 | 0.16 | -2.02 |
| IPI00022822 | Isoform 2 of Collagen alpha-1(XVIII) chain precursor | R.GLELEPGAGLFVAQAGGADPDKFQGVIK.V | 3 | 2.69 | 0.30 | -3.36 |
| IPI00022822 | Isoform 2 of Collagen alpha-1(XVIII) chain precursor | R.GLELEPGAGLFVAQAGGADPDKFQGVIK.V | 4 | 3.92 | 0.40 | -3.90 |
| IPI00022822 | Isoform 2 of Collagen alpha-1(XVIII) chain precursor | R.IFSFDGKDVLR.H                  | 2 | 3.06 | 0.35 | -1.78 |
| IPI00022822 | Isoform 2 of Collagen alpha-1(XVIII) chain precursor | R.LQDLYSIVR.R                    | 2 | 3.32 | 0.28 | -2.64 |
| IPI00022822 | Isoform 2 of Collagen alpha-1(XVIII) chain precursor | R.LTESYCETWR.T                   | 2 | 3.31 | 0.30 | -2.34 |
| IPI00022822 | Isoform 2 of Collagen alpha-1(XVIII) chain precursor | R.TEAPSATGQASSLLGGR.L            | 2 | 5.06 | 0.53 | -3.30 |
| IPI00022822 | Isoform 2 of Collagen alpha-1(XVIII) chain precursor | R.YHFPSLFFR.D                    | 3 | 2.61 | 0.08 | -4.06 |
| IPI00022890 | Ig lambda chain V region 4A precursor                | R.ALIYSTSNK.H                    | 1 | 1.66 | 0.15 |       |
| IPI00022890 | Ig lambda chain V region 4A precursor                | R.FSGSLLGGK.A                    | 2 | 2.88 | 0.08 |       |
| IPI00022891 | ADP/ATP translocase 1                                | R.M*MMQSGRKGADIM*YTGTVDCWR.K     | 3 | 2.43 | 0.11 | 2.56  |
| IPI00022891 | ADP/ATP translocase 1                                | R.RMMM*QSGR.K                    | 2 | 2.50 | 0.12 |       |
| IPI00022891 | ADP/ATP translocase 1                                | R.YFAGNLASGGAAGATSLCFVYPLDFAR.T  | 2 | 4.58 | 0.57 | -2.30 |
| IPI00022892 | Thy-1 membrane glycoprotein precursor                | K.HVLFGTGVPEHTYR.S               | 2 | 4.49 | 0.57 | -4.53 |
| IPI00022892 | Thy-1 membrane glycoprotein precursor                | K.HVLFGTGVPEHTYR.S               | 3 | 2.71 | 0.23 | -3.07 |
| IPI00022892 | Thy-1 membrane glycoprotein precursor                | K.KHVLFGTGVPEHTYR.S              | 2 | 5.39 | 0.50 | -5.25 |
| IPI00022892 | Thy-1 membrane glycoprotein precursor                | K.KHVLFGTGVPEHTYR.S              | 3 | 3.36 | 0.34 | -4.17 |
| IPI00022892 | Thy-1 membrane glycoprotein precursor                | K.VLYLSAFTSK.D                   | 1 | 2.34 | 0.36 | -4.97 |
| IPI00022892 | Thy-1 membrane glycoprotein precursor                | K.VLYLSAFTSK.D                   | 2 | 3.80 | 0.35 | -3.15 |
| IPI00022892 | Thy-1 membrane glycoprotein precursor                | K.VTSLTACLVDQSLR.L               | 2 | 4.54 | 0.40 | -4.19 |
| IPI00022892 | Thy-1 membrane glycoprotein precursor                | K.VTSLTACLVDQSLR.L               | 3 | 5.23 | 0.39 | -2.98 |
| IPI00022892 | Thy-1 membrane glycoprotein precursor                | R.HENTSSSPIQYEFSLTR.E            | 2 | 3.18 | 0.48 | 0.98  |
| IPI00022892 | Thy-1 membrane glycoprotein precursor                | S.SPIQYEFSLTR.E                  | 2 | 3.06 | 0.35 | -1.97 |
| IPI00022895 | Alpha-1B-glycoprotein precursor                      | K.HQFLLTGDTQGR.Y                 | 1 | 3.34 | 0.38 | -2.64 |
| IPI00022895 | Alpha-1B-glycoprotein precursor                      | K.HQFLLTGDTQGR.Y                 | 2 | 3.66 | 0.38 | -3.33 |
| IPI00022895 | Alpha-1B-glycoprotein precursor                      | K.LLELTGPK.S                     | 1 | 2.76 | 0.23 | -2.25 |
| IPI00022895 | Alpha-1B-glycoprotein precursor                      | K.LLELTGPK.S                     | 2 | 2.75 | 0.25 | -3.61 |
| IPI00022895 | Alpha-1B-glycoprotein precursor                      | K.NGVAQEPVHLDSPAIAK.H            | 2 | 4.38 | 0.50 | -2.87 |

|             |                                 |                                                |   |      |      |       |
|-------------|---------------------------------|------------------------------------------------|---|------|------|-------|
| IPI00022895 | Alpha-1B-glycoprotein precursor | K.NGVAQEPVHLDSPAIK.H                           | 3 | 2.06 | 0.20 | -2.05 |
| IPI00022895 | Alpha-1B-glycoprotein precursor | K.NGVAQEPVHLDSPAIKHQFLLTGDTQGR.Y               | 3 | 5.53 | 0.50 | -4.18 |
| IPI00022895 | Alpha-1B-glycoprotein precursor | K.NGVAQEPVHLDSPAIKHQFLLTGDTQGR.Y               | 4 | 2.62 | 0.25 | -3.32 |
| IPI00022895 | Alpha-1B-glycoprotein precursor | K.SLPAPWLSM*APVSWITPGLK.T                      | 2 | 5.56 | 0.63 | -5.35 |
| IPI00022895 | Alpha-1B-glycoprotein precursor | K.SLPAPWLSM*APVSWITPGLK.T                      | 3 | 5.47 | 0.49 | -4.13 |
| IPI00022895 | Alpha-1B-glycoprotein precursor | K.SLPAPWLSMAPVSWITPGLK.T                       | 2 | 4.28 | 0.51 | -2.64 |
| IPI00022895 | Alpha-1B-glycoprotein precursor | K.SLPAPWLSMAPVSWITPGLK.T                       | 3 | 3.21 | 0.33 | -2.80 |
| IPI00022895 | Alpha-1B-glycoprotein precursor | K.VTLTCVAPLSGVDFQLR.R                          | 1 | 3.11 | 0.18 |       |
| IPI00022895 | Alpha-1B-glycoprotein precursor | K.VTLTCVAPLSGVDFQLR.R                          | 2 | 5.40 | 0.51 | -4.43 |
| IPI00022895 | Alpha-1B-glycoprotein precursor | K.VTLTCVAPLSGVDFQLR.R                          | 3 | 5.94 | 0.52 | -3.45 |
| IPI00022895 | Alpha-1B-glycoprotein precursor | R.ATWSGAVLAGR.D                                | 1 | 2.11 | 0.29 | -2.71 |
| IPI00022895 | Alpha-1B-glycoprotein precursor | R.ATWSGAVLAGR.D                                | 2 | 3.94 | 0.29 | -1.75 |
| IPI00022895 | Alpha-1B-glycoprotein precursor | R.CEGPIPDVTFELLR.E                             | 1 | 1.72 | 0.11 |       |
| IPI00022895 | Alpha-1B-glycoprotein precursor | R.CEGPIPDVTFELLR.E                             | 2 | 4.30 | 0.39 | -5.75 |
| IPI00022895 | Alpha-1B-glycoprotein precursor | R.CEGPIPDVTFELLR.E                             | 3 | 2.20 | 0.13 | -1.66 |
| IPI00022895 | Alpha-1B-glycoprotein precursor | R.CEGPIPDVTFELLREGETK.A                        | 2 | 3.31 | 0.47 | -2.45 |
| IPI00022895 | Alpha-1B-glycoprotein precursor | R.CEGPIPDVTFELLREGETK.A                        | 3 | 3.24 | 0.28 | -2.90 |
| IPI00022895 | Alpha-1B-glycoprotein precursor | R.CLAPLEGAR.F                                  | 1 | 2.34 | 0.20 | -3.51 |
| IPI00022895 | Alpha-1B-glycoprotein precursor | R.CLAPLEGAR.F                                  | 2 | 3.30 | 0.29 | -1.33 |
| IPI00022895 | Alpha-1B-glycoprotein precursor | R.FALVREDR.G                                   | 2 | 2.02 | 0.12 | -2.58 |
| IPI00022895 | Alpha-1B-glycoprotein precursor | R.GEKELLVPR.S                                  | 1 | 2.08 | 0.14 | -3.40 |
| IPI00022895 | Alpha-1B-glycoprotein precursor | R.GEKELLVPR.S                                  | 2 | 1.87 | 0.05 | -2.03 |
| IPI00022895 | Alpha-1B-glycoprotein precursor | R.LELHVDGPPPRPQLR.A                            | 2 | 2.79 | 0.30 | -3.64 |
| IPI00022895 | Alpha-1B-glycoprotein precursor | R.LELHVDGPPPRPQLR.A                            | 3 | 3.22 | 0.31 | -4.75 |
| IPI00022895 | Alpha-1B-glycoprotein precursor | R.LELHVDGPPPRPQLR.A                            | 4 | 2.89 | 0.36 | -4.74 |
| IPI00022895 | Alpha-1B-glycoprotein precursor | R.LETPDFQLFK.N                                 | 1 | 2.53 | 0.11 | -3.91 |
| IPI00022895 | Alpha-1B-glycoprotein precursor | R.LETPDFQLFK.N                                 | 2 | 2.64 | 0.28 | -4.07 |
| IPI00022895 | Alpha-1B-glycoprotein precursor | R.LHDNQNGWSGDSAPVELILSDETLPAPEFSPEPESGR.A      | 3 | 6.42 | 0.57 | -3.25 |
| IPI00022895 | Alpha-1B-glycoprotein precursor | R.LHDNQNGWSGDSAPVELILSDETLPAPEFSPEPESGR.A      | 4 | 4.90 | 0.39 | -3.81 |
| IPI00022895 | Alpha-1B-glycoprotein precursor | R.RGEKELLVPR.S                                 | 2 | 3.66 | 0.27 | -4.05 |
| IPI00022895 | Alpha-1B-glycoprotein precursor | R.SGLSTGWTQLSK.L                               | 1 | 2.33 | 0.30 | -5.48 |
| IPI00022895 | Alpha-1B-glycoprotein precursor | R.SGLSTGWTQLSK.L                               | 2 | 3.99 | 0.34 | -2.52 |
| IPI00022895 | Alpha-1B-glycoprotein precursor | R.SSTSPDRIFHFLNAVALGDGGHYTCR.Y                 | 3 | 6.62 | 0.43 |       |
| IPI00022895 | Alpha-1B-glycoprotein precursor | R.SWVPHTFESELSDPVELLVAES.-                     | 2 | 3.90 | 0.33 | -5.98 |
| IPI00022895 | Alpha-1B-glycoprotein precursor | R.SWVPHTFESELSDPVELLVAES.-                     | 3 | 4.52 | 0.42 | -4.08 |
| IPI00022895 | Alpha-1B-glycoprotein precursor | R.TDGEALSEPVSATVTIEELAAPPPVLM*HHGESSQVLHPGNK.V | 3 | 4.24 | 0.52 | -4.31 |
| IPI00022895 | Alpha-1B-glycoprotein precursor | R.TDGEALSEPVSATVTIEELAAPPPVLM*HHGESSQVLHPGNK.V | 4 | 3.62 | 0.27 | -4.07 |
| IPI00022895 | Alpha-1B-glycoprotein precursor | R.TDGEALSEPVSATVTIEELAAPPPVLM*HHGESSQVLHPGNK.V | 5 | 1.98 | 0.28 | -2.72 |
| IPI00022895 | Alpha-1B-glycoprotein precursor | R.TDGEALSEPVSATVTIEELAAPPPVLMHHGESSQVLHPGNK.V  | 3 | 5.06 | 0.41 |       |
| IPI00022895 | Alpha-1B-glycoprotein precursor | R.TPGAAANLELIFVGPQHAGNYR.C                     | 2 | 5.63 | 0.58 | -6.05 |
| IPI00022895 | Alpha-1B-glycoprotein precursor | R.TPGAAANLELIFVGPQHAGNYR.C                     | 3 | 6.99 | 0.62 | -5.55 |
| IPI00022895 | Alpha-1B-glycoprotein precursor | R.YRLHDNQNGWSGDSAPVELILSDETLPAPEFSPEPESGR.A    | 3 | 4.92 | 0.40 |       |



|             |                                 |                                    |   |      |      |       |
|-------------|---------------------------------|------------------------------------|---|------|------|-------|
| IPI00022895 | Alpha-1B-glycoprotein precursor | W.SGDSAPVELILSDETLPAPEFSPEPESEGR.A | 3 | 4.73 | 0.40 | -4.69 |
| IPI00022937 | Coagulation factor V            | E.KPQSTISGLLGPTLYAEVGDIIK.V        | 3 | 4.33 | 0.43 | -3.07 |
| IPI00022937 | Coagulation factor V            | K.ADKPLSIHPQGIR.Y                  | 2 | 3.17 | 0.38 | -3.88 |
| IPI00022937 | Coagulation factor V            | K.DGTDYIEIIPK.E                    | 2 | 3.85 | 0.26 | -3.90 |
| IPI00022937 | Coagulation factor V            | K.DSNM*PM*DM*R.E                   | 2 | 1.91 | 0.40 | -3.64 |
| IPI00022937 | Coagulation factor V            | K.EDGILGPIIR.A                     | 2 | 2.52 | 0.18 | -1.62 |
| IPI00022937 | Coagulation factor V            | K.EFNPLVIVGLSK.D                   | 1 | 3.26 | 0.34 | -3.86 |
| IPI00022937 | Coagulation factor V            | K.EFNPLVIVGLSK.D                   | 2 | 3.89 | 0.36 | -3.76 |
| IPI00022937 | Coagulation factor V            | K.EKPQSTISGLLGPTLYAEVGDIIK.V       | 2 | 4.36 | 0.42 | -2.69 |
| IPI00022937 | Coagulation factor V            | K.EKPQSTISGLLGPTLYAEVGDIIK.V       | 3 | 6.54 | 0.53 | -6.08 |
| IPI00022937 | Coagulation factor V            | K.EVIITGIQTQGAH.H                  | 2 | 4.49 | 0.43 | -2.76 |
| IPI00022937 | Coagulation factor V            | K.FTVNNLAEPQK.A                    | 2 | 2.92 | 0.27 | -2.52 |
| IPI00022937 | Coagulation factor V            | K.HTVNPNM*KEDGILGPIIR.A            | 2 | 4.06 | 0.29 |       |
| IPI00022937 | Coagulation factor V            | K.IVYREYEPYFKK.K                   | 3 | 2.11 | 0.18 | -1.71 |
| IPI00022937 | Coagulation factor V            | K.IVYREYEPYFKK.E                   | 2 | 2.64 | 0.07 | -3.70 |
| IPI00022937 | Coagulation factor V            | K.IVYREYEPYFKK.E                   | 3 | 2.64 | 0.22 | -2.88 |
| IPI00022937 | Coagulation factor V            | K.KVM*YTQYEDESFTK.H                | 3 | 2.65 | 0.09 | 0.54  |
| IPI00022937 | Coagulation factor V            | K.LSEGASYLDHTFPAEK.M               | 2 | 4.97 | 0.44 | -2.23 |
| IPI00022937 | Coagulation factor V            | K.LSEGASYLDHTFPAEK.M               | 3 | 2.95 | 0.22 | -2.01 |
| IPI00022937 | Coagulation factor V            | K.LSEGASYLDHTFPAEKM*DDAVAPGR.E     | 3 | 4.62 | 0.43 | -3.37 |
| IPI00022937 | Coagulation factor V            | K.LSEGASYLDHTFPAEKM*DDAVAPGR.E     | 4 | 2.89 | 0.22 | 1.98  |
| IPI00022937 | Coagulation factor V            | K.M*DDAVAPGR.E                     | 2 | 2.33 | 0.07 | -2.99 |
| IPI00022937 | Coagulation factor V            | K.M*YEQEWVR.L                      | 2 | 3.01 | 0.16 | -1.83 |
| IPI00022937 | Coagulation factor V            | K.NFFNPPIISR.F                     | 2 | 2.65 | 0.18 | -2.48 |
| IPI00022937 | Coagulation factor V            | K.NKADKPLSIHPQGIR.Y                | 4 | 1.92 | 0.17 | -4.31 |
| IPI00022937 | Coagulation factor V            | K.QITASSFKK.S                      | 1 | 2.20 | 0.07 | -4.66 |
| IPI00022937 | Coagulation factor V            | K.RDPRGEYEEHLGILGPIIR.A            | 3 | 3.09 | 0.27 | -2.50 |
| IPI00022937 | Coagulation factor V            | K.SSM*VDKIFEGTNTK.G                | 2 | 3.25 | 0.34 | -2.02 |
| IPI00022937 | Coagulation factor V            | K.SSM*VDKIFEGTNTK.G                | 3 | 2.58 | 0.14 | 2.92  |
| IPI00022937 | Coagulation factor V            | K.TFDKQIVLLFAVFDESK.S              | 3 | 3.63 | 0.42 | -3.04 |
| IPI00022937 | Coagulation factor V            | K.WIISSLTPK.H                      | 2 | 2.61 | 0.17 | -0.71 |
| IPI00022937 | Coagulation factor V            | K.WNILEFDEPTENDAQLTRPYSDVDIM*R.D   | 3 | 5.83 | 0.55 | -2.71 |
| IPI00022937 | Coagulation factor V            | K.YLDSTFTK.R                       | 2 | 2.63 | 0.26 | -2.12 |
| IPI00022937 | Coagulation factor V            | R.AADIEQQAVFAVFDENK.S              | 2 | 5.60 | 0.55 | -5.68 |
| IPI00022937 | Coagulation factor V            | R.AADIEQQAVFAVFDENK.S              | 3 | 4.83 | 0.43 | -4.21 |
| IPI00022937 | Coagulation factor V            | R.AEVDDVIQVR.F                     | 2 | 3.91 | 0.28 | -3.05 |
| IPI00022937 | Coagulation factor V            | R.AGM*QTPFLIM*DR.D                 | 2 | 3.53 | 0.27 | -2.22 |
| IPI00022937 | Coagulation factor V            | R.AVQPGETYTYK.W                    | 1 | 2.21 | 0.13 | -1.77 |
| IPI00022937 | Coagulation factor V            | R.AVQPGETYTYK.W                    | 2 | 2.98 | 0.41 | -2.27 |
| IPI00022937 | Coagulation factor V            | R.AWAYYSAVNPEKDIHSLIGPLLICQK.G     | 4 | 2.98 | 0.21 | -2.70 |
| IPI00022937 | Coagulation factor V            | R.DIASGLIGLLLICK.S                 | 2 | 4.20 | 0.38 | -3.49 |
| IPI00022937 | Coagulation factor V            | R.DIASGLIGLLLICK.S                 | 3 | 3.81 | 0.31 | -1.62 |

|             |                                                              |                                 |   |      |      |       |
|-------------|--------------------------------------------------------------|---------------------------------|---|------|------|-------|
| IPI00022937 | Coagulation factor V                                         | R.ETDIEDSDIPEDTTYK.K            | 2 | 5.42 | 0.55 | -4.58 |
| IPI00022937 | Coagulation factor V                                         | R.GEYEEHLGILGPIIR.A             | 2 | 3.68 | 0.42 | -0.73 |
| IPI00022937 | Coagulation factor V                                         | R.GEYEEHLGILGPIIR.A             | 3 | 3.54 | 0.30 | -0.99 |
| IPI00022937 | Coagulation factor V                                         | R.KM*HDLRLEPEDEESDADYDQNR.L     | 4 | 2.71 | 0.16 | -1.19 |
| IPI00022937 | Coagulation factor V                                         | R.KYLDSTFTK.R                   | 2 | 2.52 | 0.08 | -2.63 |
| IPI00022937 | Coagulation factor V                                         | R.LLSLGAGEFK.S                  | 1 | 1.92 | 0.16 | -2.71 |
| IPI00022937 | Coagulation factor V                                         | R.LLSLGAGEFK.S                  | 2 | 2.17 | 0.11 | -2.75 |
| IPI00022937 | Coagulation factor V                                         | R.LNNGGSYNAWSVEK.L              | 2 | 4.53 | 0.48 | -1.79 |
| IPI00022937 | Coagulation factor V                                         | R.M*PM*GLSTGIISDSQIK.A          | 2 | 4.40 | 0.39 | -2.90 |
| IPI00022937 | Coagulation factor V                                         | R.M*PM*GLSTGIISDSQIK.A          | 3 | 2.94 | 0.10 | -2.19 |
| IPI00022937 | Coagulation factor V                                         | R.NVM*YFNGNSDASTIKENQFDPPIVAR.Y | 3 | 4.78 | 0.49 | -4.30 |
| IPI00022937 | Coagulation factor V                                         | R.NVMYFNGNSDASTIKENQFDPPIVAR.Y  | 3 | 4.20 | 0.31 |       |
| IPI00022937 | Coagulation factor V                                         | R.SEAYNTFSER.R                  | 1 | 2.07 | 0.25 | -0.42 |
| IPI00022937 | Coagulation factor V                                         | R.SEAYNTFSER.R                  | 2 | 3.13 | 0.34 | -2.78 |
| IPI00022937 | Coagulation factor V                                         | R.SGPESPGSACR.A                 | 2 | 2.20 | 0.09 | -2.05 |
| IPI00022937 | Coagulation factor V                                         | R.SQHLDNFSNQIGK.H               | 2 | 4.35 | 0.44 | -4.02 |
| IPI00022937 | Coagulation factor V                                         | R.SQHLDNFSNQIGK.H               | 3 | 3.11 | 0.32 | -3.00 |
| IPI00022937 | Coagulation factor V                                         | R.SSSPELSEM*LEYDR.S             | 2 | 4.31 | 0.48 | -5.08 |
| IPI00022937 | Coagulation factor V                                         | R.TFHPLRSEAYNTFSER.R            | 2 | 3.28 | 0.35 | -5.62 |
| IPI00022937 | Coagulation factor V                                         | R.TFHPLRSEAYNTFSER.R            | 3 | 2.26 | 0.30 | -3.67 |
| IPI00022958 | PRO0149                                                      | R.LPRFQMPNSR.I                  | 2 | 1.65 | 0.20 | -3.02 |
| IPI00022959 | Isoform 1 of Poliovirus receptor-related protein 3 precursor | K.CNADANPPPFK.S                 | 2 | 2.98 | 0.21 | -1.21 |
| IPI00022959 | Isoform 1 of Poliovirus receptor-related protein 3 precursor | K.SSQTAVVHHPQYGFSVQGEYQGR.V     | 3 | 5.23 | 0.48 | -3.26 |
| IPI00022959 | Isoform 1 of Poliovirus receptor-related protein 3 precursor | K.SSQTAVVHHPQYGFSVQGEYQGR.V     | 4 | 2.80 | 0.20 | -2.51 |
| IPI00022959 | Isoform 1 of Poliovirus receptor-related protein 3 precursor | K.VTNSLGQR.S                    | 2 | 2.90 | 0.16 | -3.69 |
| IPI00022977 | Creatine kinase B-type                                       | K.DLFDPIIEDR.H                  | 2 | 1.97 | 0.14 | -4.28 |
| IPI00022977 | Creatine kinase B-type                                       | R.GTGGVDTAAVGGVFDVSNADR.L       | 2 | 4.15 | 0.60 | -3.61 |
| IPI00022977 | Creatine kinase B-type                                       | R.LGFSEVELVQMVDGVK.L            | 2 | 4.83 | 0.46 | -2.45 |
| IPI00022977 | Creatine kinase B-type                                       | R.LGFSEVELVQMVDGVK.L            | 3 | 4.92 | 0.32 | -1.24 |
| IPI00022989 | Isoform Beta-1 of Retinoic acid receptor beta                | K.LQEPLLEALKIYIRK.R             | 2 | 2.30 | 0.13 |       |
| IPI00023014 | von Willebrand factor precursor                              | K.LSGEAYGFVAR.I                 | 2 | 3.76 | 0.38 | -2.00 |
| IPI00023014 | von Willebrand factor precursor                              | K.LSPVYAGK.T                    | 1 | 1.84 | 0.08 | -1.81 |
| IPI00023014 | von Willebrand factor precursor                              | K.YAGSQVASTSEVLK.Y              | 2 | 3.58 | 0.34 | -2.98 |
| IPI00023014 | von Willebrand factor precursor                              | K.YTLFQIFSK.I                   | 2 | 2.74 | 0.29 | -1.99 |
| IPI00023014 | von Willebrand factor precursor                              | R.DCNTCICR.N                    | 2 | 2.60 | 0.24 | -2.23 |
| IPI00023014 | von Willebrand factor precursor                              | R.IQHTVTASVR.L                  | 2 | 1.71 | 0.06 | -1.11 |
| IPI00023014 | von Willebrand factor precursor                              | R.LPGLHNSLVK.L                  | 2 | 2.03 | 0.17 | -2.30 |
| IPI00023014 | von Willebrand factor precursor                              | R.SFSIIGDFQNGKR.V               | 2 | 3.02 | 0.24 | -2.82 |

|             |                                                                                     |                                             |   |      |      |       |
|-------------|-------------------------------------------------------------------------------------|---------------------------------------------|---|------|------|-------|
| IPI00023014 | von Willebrand factor precursor                                                     | R.SFSIIGDFQNGKR.V                           | 3 | 2.33 | 0.22 | -1.93 |
| IPI00023014 | von Willebrand factor precursor                                                     | R.VSM*PYASK.G                               | 2 | 2.29 | 0.16 | -4.35 |
| IPI00023019 | Isoform 1 of Sex hormone-binding globulin precursor                                 | K.QAAGSGHLLALGTPENPSWLSLHLQDQK.V            | 3 | 3.29 | 0.24 | -1.22 |
| IPI00023019 | Isoform 1 of Sex hormone-binding globulin precursor                                 | K.QAEISASAPTSR.S                            | 2 | 3.63 | 0.27 | -2.63 |
| IPI00023019 | Isoform 1 of Sex hormone-binding globulin precursor                                 | K.TSSSFEVR.T                                | 2 | 2.25 | 0.15 | 2.60  |
| IPI00023019 | Isoform 1 of Sex hormone-binding globulin precursor                                 | K.VVLSSGSGPGLDLPLVLGLPLQLK.L                | 2 | 5.25 | 0.56 | -4.44 |
| IPI00023019 | Isoform 1 of Sex hormone-binding globulin precursor                                 | K.VVLSSGSGPGLDLPLVLGLPLQLK.L                | 3 | 3.81 | 0.39 | -4.42 |
| IPI00023019 | Isoform 1 of Sex hormone-binding globulin precursor                                 | R.DSWLDKQAEISASAPTSR.S                      | 2 | 5.28 | 0.43 | -3.30 |
| IPI00023019 | Isoform 1 of Sex hormone-binding globulin precursor                                 | R.IALGGLLPASNLR.L                           | 2 | 4.17 | 0.41 | -3.51 |
| IPI00023019 | Isoform 1 of Sex hormone-binding globulin precursor                                 | R.IALGGLLPASNLR.L                           | 3 | 3.50 | 0.30 | -2.78 |
| IPI00023019 | Isoform 1 of Sex hormone-binding globulin precursor                                 | R.LFLGALPGEDSSTSFCLNGLWAQQQR.L              | 3 | 4.05 | 0.40 | -7.59 |
| IPI00023019 | Isoform 1 of Sex hormone-binding globulin precursor                                 | R.LRQVSGPLTSK.R                             | 2 | 3.00 | 0.28 | -3.44 |
| IPI00023019 | Isoform 1 of Sex hormone-binding globulin precursor                                 | R.VVLSQGSK.M                                | 1 | 1.79 | 0.22 | -1.26 |
| IPI00023087 | Ubiquitin-conjugating enzyme E2 T                                                   | R.AQILGGANTPYEK.G                           | 2 | 2.61 | 0.09 |       |
| IPI00023152 | Isoform 1 of N-acetylated-alpha-linked acidic dipeptidase-like protein              | -.MQWTKVLGLGLGAAALLGLGILGHFAIPKK.A          | 3 | 1.88 | 0.18 | -7.78 |
| IPI00023162 | UDP-N-acetylglucosamine 2-epimerase/N-acetylmannosamine kinase                      | R.M*IEQDDFDINTR.L                           | 2 | 2.60 | 0.14 | 1.96  |
| IPI00023184 | Isoform 1 of Poly [ADP-ribose] polymerase 3                                         | K.EMFKNTM*ALM*DLDVK.K                       | 3 | 2.56 | 0.18 |       |
| IPI00023191 | Target of myb1                                                                      | K.AADRLPNLSSPSAEGPPGPPSGPAPR.K              | 3 | 4.67 | 0.37 | -1.24 |
| IPI00023191 | Target of myb1                                                                      | R.VLELIPQIANEQLTEELLIVNDNLNNVFLR.H          | 3 | 2.36 | 0.17 | -2.20 |
| IPI00023217 | Isoform 1 of Ryanodine receptor 2                                                   | K.EAATPEEESDTLEK.E                          | 1 | 3.39 | 0.08 |       |
| IPI00023315 | Bone morphogenetic protein 3b precursor                                             | R.YDPFPA GDPEPR.A                           | 2 | 3.20 | 0.45 | -3.39 |
| IPI00023322 | Zinc finger protein ubi-d4                                                          | K.TGQPEELVSCSDCGRSGHPSCQLQFTPVMMAAVKTYR.W   | 4 | 3.03 | 0.11 | -2.77 |
| IPI00023340 | Histone acetyltransferase MYST3                                                     | R.YSEGDRAVLRGFSESSEEEEEPE SPRSSSPILTKPTLK.R | 4 | 2.40 | 0.12 | -6.68 |
| IPI00023359 | Isoform 1 of Malonyl CoA-acyl carrier protein transacylase, mitochondrial precursor | K.KPLVSVYSNVHAHR.Y                          | 3 | 1.68 | 0.11 | -4.09 |
| IPI00023407 | Nck-associated protein 1-like                                                       | R.M*LDSVEKLLVETSDLSTFCFHLR.I                | 3 | 2.05 | 0.12 | -6.97 |
| IPI00023505 | Low affinity immunoglobulin gamma Fc region receptor II-a precursor                 | K.VTFFQNGK.S                                | 1 | 2.11 | 0.25 | -3.18 |

|             |                                                                                 |                                             |   |      |      |       |
|-------------|---------------------------------------------------------------------------------|---------------------------------------------|---|------|------|-------|
| IPI00023505 | Low affinity immunoglobulin gamma Fc region receptor II-a precursor             | K.VTFFQNGK.S                                | 2 | 2.14 | 0.18 | -2.48 |
| IPI00023513 | Isoform 1 of E3 ubiquitin-protein ligase CHFR                                   | R.SSSCGSGGGGISP.K                           | 3 | 2.25 | 0.19 |       |
| IPI00023542 | transmembrane emp24 protein transport domain containing 9                       | K.FSLFAGGM*LR.V                             | 2 | 3.10 | 0.33 | -1.65 |
| IPI00023576 | Leucine-rich repeat transmembrane neuronal protein 2 precursor                  | K.AIDLTVFETM*PNLK.I                         | 2 | 2.71 | 0.33 | -1.88 |
| IPI00023576 | Leucine-rich repeat transmembrane neuronal protein 2 precursor                  | K.ILLM*DNNKLNLSLDSK.I                       | 2 | 3.05 | 0.30 | -1.05 |
| IPI00023576 | Leucine-rich repeat transmembrane neuronal protein 2 precursor                  | K.ILLM*DNNKLNLSLDSK.I                       | 3 | 2.86 | 0.32 | -0.19 |
| IPI00023576 | Leucine-rich repeat transmembrane neuronal protein 2 precursor                  | K.INFAHFLR.L                                | 2 | 2.85 | 0.10 | -1.59 |
| IPI00023576 | Leucine-rich repeat transmembrane neuronal protein 2 precursor                  | R.SLEFLDLSTNR.L                             | 2 | 3.40 | 0.32 | -3.52 |
| IPI00023598 | Tubulin beta-4 chain                                                            | K.GHYTEGAELVDAVLVDVVR.K                     | 3 | 2.77 | 0.06 | -1.45 |
| IPI00023598 | Tubulin beta-4 chain                                                            | K.MAATFIGNSTAIQELFK.R                       | 2 | 4.57 | 0.37 | -1.97 |
| IPI00023598 | Tubulin beta-4 chain                                                            | K.NM*M*AACDPR.H                             | 2 | 1.73 | 0.12 | 0.11  |
| IPI00023598 | Tubulin beta-4 chain                                                            | K.VSDTVVEPYNATLSVHQLVENTDETYCIDNEALYDICFR.T | 3 | 4.91 | 0.43 | -2.95 |
| IPI00023598 | Tubulin beta-4 chain                                                            | K.VSDTVVEPYNATLSVHQLVENTDETYCIDNEALYDICFR.T | 4 | 4.05 | 0.34 | -2.05 |
| IPI00023598 | Tubulin beta-4 chain                                                            | R.ISEQFTAM*FR.R                             | 2 | 2.17 | 0.13 | -2.65 |
| IPI00023598 | Tubulin beta-4 chain                                                            | R.ISEQFTAMFR.R                              | 2 | 2.87 | 0.27 | -0.81 |
| IPI00023598 | Tubulin beta-4 chain                                                            | R.LHFFM*PGFAPLTSR.G                         | 3 | 3.20 | 0.06 | -3.00 |
| IPI00023598 | Tubulin beta-4 chain                                                            | R.LHFFMPGFAPLTSR.G                          | 3 | 2.62 | 0.11 | -1.73 |
| IPI00023643 | Sema domain, transmembrane domain (TM), and cytoplasmic domain, (Semaphorin) 6C | R.DLPDDVLTFIK.A                             | 2 | 2.66 | 0.24 | -3.16 |
| IPI00023643 | Sema domain, transmembrane domain (TM), and cytoplasmic domain, (Semaphorin) 6C | R.EVSVEDAR.L                                | 2 | 1.77 | 0.09 | -2.13 |
| IPI00023643 | Sema domain, transmembrane domain (TM), and cytoplasmic domain, (Semaphorin) 6C | R.RIIGLELDTEGHR.L                           | 3 | 2.81 | 0.13 | -1.79 |
| IPI00023643 | Sema domain, transmembrane domain (TM), and cytoplasmic domain, (Semaphorin) 6C | R.SGGPEPILLEEIDAYSPAR.C                     | 2 | 4.42 | 0.45 | -4.78 |
| IPI00023648 | Immunoglobulin superfamily containing leucine-rich repeat protein precursor     | K.M*DSNELTFIPR.D                            | 2 | 3.60 | 0.28 | -1.90 |
| IPI00023648 | Immunoglobulin superfamily containing leucine-rich repeat protein precursor     | K.TWALTTAVSIPEQDNIACSPHVLK.G                | 3 | 2.76 | 0.16 | -3.55 |
| IPI00023648 | Immunoglobulin superfamily containing leucine-rich repeat protein precursor     | R.ALPGTPVASSQPR.F                           | 1 | 2.59 | 0.33 | -2.62 |
| IPI00023648 | Immunoglobulin superfamily containing leucine-rich repeat protein precursor     | R.ALPGTPVASSQPR.F                           | 2 | 2.84 | 0.34 | -2.99 |
| IPI00023648 | Immunoglobulin superfamily containing leucine-rich repeat protein precursor     | R.EVPLLQSLWLAHNEIR.T                        | 2 | 4.17 | 0.51 | -2.87 |

|             |                                                                             |                                        |   |      |      |       |
|-------------|-----------------------------------------------------------------------------|----------------------------------------|---|------|------|-------|
| IPI00023648 | Immunoglobulin superfamily containing leucine-rich repeat protein precursor | R.EVPLLQSLWLAHNEIR.T                   | 3 | 1.99 | 0.33 | -2.22 |
| IPI00023648 | Immunoglobulin superfamily containing leucine-rich repeat protein precursor | R.LPGLPEGAFR.E                         | 1 | 1.95 | 0.33 | -3.20 |
| IPI00023648 | Immunoglobulin superfamily containing leucine-rich repeat protein precursor | R.LPGLPEGAFR.E                         | 2 | 2.64 | 0.18 | -2.89 |
| IPI00023648 | Immunoglobulin superfamily containing leucine-rich repeat protein precursor | R.SLQLNHNR.L                           | 1 | 1.76 | 0.08 | -5.42 |
| IPI00023648 | Immunoglobulin superfamily containing leucine-rich repeat protein precursor | R.TVAAGALASLSHLK.S                     | 2 | 4.84 | 0.46 | -4.64 |
| IPI00023648 | Immunoglobulin superfamily containing leucine-rich repeat protein precursor | R.TVAAGALASLSHLK.S                     | 3 | 1.90 | 0.18 | -5.17 |
| IPI00023673 | Galectin-3-binding protein precursor                                        | K.AVDTWSWGER.A                         | 2 | 2.98 | 0.30 |       |
| IPI00023673 | Galectin-3-binding protein precursor                                        | K.KTLQALEFHTVPFQLLAR.Y                 | 2 | 4.87 | 0.51 | -3.87 |
| IPI00023673 | Galectin-3-binding protein precursor                                        | K.KTLQALEFHTVPFQLLAR.Y                 | 3 | 3.96 | 0.30 | -3.92 |
| IPI00023673 | Galectin-3-binding protein precursor                                        | K.KTLQALEFHTVPFQLLAR.Y                 | 4 | 3.34 | 0.17 | -3.07 |
| IPI00023673 | Galectin-3-binding protein precursor                                        | K.LASAYGAR.Q                           | 1 | 2.07 | 0.09 | -1.65 |
| IPI00023673 | Galectin-3-binding protein precursor                                        | K.LASAYGAR.Q                           | 2 | 2.48 | 0.05 | -4.31 |
| IPI00023673 | Galectin-3-binding protein precursor                                        | K.SGGSDRTIAYENK.A                      | 2 | 3.20 | 0.29 | -2.58 |
| IPI00023673 | Galectin-3-binding protein precursor                                        | K.SGGSDRTIAYENK.A                      | 3 | 3.62 | 0.35 | -2.24 |
| IPI00023673 | Galectin-3-binding protein precursor                                        | K.SQLVYQSR.R                           | 1 | 1.98 | 0.07 | -1.38 |
| IPI00023673 | Galectin-3-binding protein precursor                                        | K.SQLVYQSR.R                           | 2 | 2.55 | 0.26 | -0.75 |
| IPI00023673 | Galectin-3-binding protein precursor                                        | K.TLQALEFHTVPFQLLAR.Y                  | 2 | 6.11 | 0.54 | -3.53 |
| IPI00023673 | Galectin-3-binding protein precursor                                        | K.TLQALEFHTVPFQLLAR.Y                  | 3 | 4.39 | 0.40 | -3.58 |
| IPI00023673 | Galectin-3-binding protein precursor                                        | K.YSSDYFQAPSDYR.Y                      | 2 | 4.49 | 0.49 | -3.86 |
| IPI00023673 | Galectin-3-binding protein precursor                                        | K.YSSDYFQAPSDYRYYPYQSFQTPQHPSFLFQDKR.V | 4 | 5.16 | 0.52 | -5.23 |
| IPI00023673 | Galectin-3-binding protein precursor                                        | R.AAFGQGSGPIM*LDEVQCTGTEASLADCK.S      | 2 | 5.17 | 0.62 | -3.13 |
| IPI00023673 | Galectin-3-binding protein precursor                                        | R.AAFGQGSGPIM*LDEVQCTGTEASLADCK.S      | 3 | 6.04 | 0.62 | -4.96 |
| IPI00023673 | Galectin-3-binding protein precursor                                        | R.ASHEEVEGLVEK.I                       | 1 | 2.87 | 0.34 | -3.16 |
| IPI00023673 | Galectin-3-binding protein precursor                                        | R.ASHEEVEGLVEK.I                       | 2 | 3.13 | 0.33 | -3.08 |
| IPI00023673 | Galectin-3-binding protein precursor                                        | R.ASHEEVEGLVEK.I                       | 3 | 3.45 | 0.21 | -2.07 |
| IPI00023673 | Galectin-3-binding protein precursor                                        | R.ELSEALGQIFDSQR.G                     | 2 | 3.95 | 0.36 | -2.71 |
| IPI00023673 | Galectin-3-binding protein precursor                                        | R.ELSEALGQIFDSQR.G                     | 3 | 3.49 | 0.29 | -2.22 |
| IPI00023673 | Galectin-3-binding protein precursor                                        | R.GQWGTVCNDLWDLTDASVVCR.A              | 2 | 5.84 | 0.57 | -7.94 |
| IPI00023673 | Galectin-3-binding protein precursor                                        | R.GQWGTVCNDLWDLTDASVVCR.A              | 3 | 4.37 | 0.33 |       |
| IPI00023673 | Galectin-3-binding protein precursor                                        | R.IDITLSSVK.C                          | 2 | 2.69 | 0.17 | -2.41 |
| IPI00023673 | Galectin-3-binding protein precursor                                        | R.IYTSPTWSAFVTDSSWSAR.K                | 2 | 6.06 | 0.60 | -2.74 |
| IPI00023673 | Galectin-3-binding protein precursor                                        | R.IYTSPTWSAFVTDSSWSAR.K                | 3 | 2.29 | 0.17 | -3.03 |
| IPI00023673 | Galectin-3-binding protein precursor                                        | R.KSQLVYQSR.R                          | 1 | 2.55 | 0.23 | -4.81 |
| IPI00023673 | Galectin-3-binding protein precursor                                        | R.LADGGATNQGR.V                        | 1 | 1.27 | 0.14 | -2.28 |
| IPI00023673 | Galectin-3-binding protein precursor                                        | R.LADGGATNQGR.V                        | 2 | 3.89 | 0.47 | -2.48 |
| IPI00023673 | Galectin-3-binding protein precursor                                        | R.LADGGATNQGRVEIFYR.G                  | 3 | 3.20 | 0.15 | -2.51 |

|             |                                                  |                                 |   |      |      |       |
|-------------|--------------------------------------------------|---------------------------------|---|------|------|-------|
| IPI00023673 | Galectin-3-binding protein precursor             | R.RIDITLSSVK.C                  | 1 | 2.71 | 0.31 | -3.53 |
| IPI00023673 | Galectin-3-binding protein precursor             | R.RIDITLSSVK.C                  | 2 | 3.27 | 0.29 | -3.83 |
| IPI00023673 | Galectin-3-binding protein precursor             | R.SDLAVPSELALLK.A               | 1 | 2.68 | 0.30 | -3.42 |
| IPI00023673 | Galectin-3-binding protein precursor             | R.SDLAVPSELALLK.A               | 2 | 3.21 | 0.30 | -3.94 |
| IPI00023673 | Galectin-3-binding protein precursor             | R.SDLAVPSELALLKAVDTWSWGER.A     | 3 | 2.30 | 0.12 | -3.49 |
| IPI00023673 | Galectin-3-binding protein precursor             | R.STHTLDLSR.E                   | 1 | 2.54 | 0.24 | -5.06 |
| IPI00023673 | Galectin-3-binding protein precursor             | R.STHTLDLSR.E                   | 2 | 2.69 | 0.26 | -2.61 |
| IPI00023673 | Galectin-3-binding protein precursor             | R.STHTLDLSRELSEALGQIFDSQR.G     | 3 | 3.64 | 0.33 | -5.74 |
| IPI00023673 | Galectin-3-binding protein precursor             | R.TIAYENK.A                     | 1 | 1.80 | 0.17 | -3.13 |
| IPI00023673 | Galectin-3-binding protein precursor             | R.TIAYENK.A                     | 2 | 2.43 | 0.22 | -5.47 |
| IPI00023673 | Galectin-3-binding protein precursor             | R.YKGLNLTEDTYKPR.I              | 3 | 2.94 | 0.39 | -3.12 |
| IPI00023673 | Galectin-3-binding protein precursor             | R.YYPYQSFQTPQHPSFLFQDK.R        | 2 | 2.85 | 0.43 | -0.83 |
| IPI00023673 | Galectin-3-binding protein precursor             | R.YYPYQSFQTPQHPSFLFQDK.R        | 3 | 2.35 | 0.16 | -2.55 |
| IPI00023673 | Galectin-3-binding protein precursor             | R.YYPYQSFQTPQHPSFLFQDKR.V       | 2 | 4.73 | 0.47 | -3.81 |
| IPI00023673 | Galectin-3-binding protein precursor             | R.YYPYQSFQTPQHPSFLFQDKR.V       | 3 | 2.52 | 0.32 | -4.52 |
| IPI00023673 | Galectin-3-binding protein precursor             | Y.PYQSFQTPQHPSFLFQDKR.V         | 3 | 5.21 | 0.44 | -3.12 |
| IPI00023728 | Gamma-glutamyl hydrolase precursor               | K.FFNVLTTNTDGK.I                | 2 | 2.52 | 0.21 | 1.12  |
| IPI00023728 | Gamma-glutamyl hydrolase precursor               | K.NLDGISHAPNAVK.T               | 2 | 3.69 | 0.34 | -3.05 |
| IPI00023728 | Gamma-glutamyl hydrolase precursor               | K.SINGILFPGGSVDLR.R             | 2 | 4.27 | 0.42 | -4.38 |
| IPI00023728 | Gamma-glutamyl hydrolase precursor               | K.TAFYLAEFFVNEAR.K              | 2 | 5.23 | 0.52 | -5.24 |
| IPI00023728 | Gamma-glutamyl hydrolase precursor               | K.TAFYLAEFFVNEAR.K              | 3 | 5.25 | 0.36 | -4.35 |
| IPI00023728 | Gamma-glutamyl hydrolase precursor               | K.YLESAGAR.V                    | 1 | 2.25 | 0.16 | -2.74 |
| IPI00023728 | Gamma-glutamyl hydrolase precursor               | K.YLESAGAR.V                    | 2 | 2.68 | 0.16 | -2.70 |
| IPI00023728 | Gamma-glutamyl hydrolase precursor               | R.LDLTEKDYEILFK.S               | 2 | 4.29 | 0.34 | -3.55 |
| IPI00023728 | Gamma-glutamyl hydrolase precursor               | R.LDLTEKDYEILFK.S               | 3 | 4.20 | 0.33 | -2.24 |
| IPI00023728 | Gamma-glutamyl hydrolase precursor               | R.M*FQNFPTLLLLSLAVEPLTANFHK.W   | 3 | 6.09 | 0.52 | -5.40 |
| IPI00023728 | Gamma-glutamyl hydrolase precursor               | R.M*FQNFPTLLLLSLAVEPLTANFHK.W   | 4 | 2.86 | 0.15 | -3.89 |
| IPI00023728 | Gamma-glutamyl hydrolase precursor               | R.VVPVRLDLTEKDYEILFK.S          | 2 | 3.75 | 0.44 | -5.88 |
| IPI00023728 | Gamma-glutamyl hydrolase precursor               | R.VVPVRLDLTEKDYEILFK.S          | 3 | 3.39 | 0.34 | -4.03 |
| IPI00023728 | Gamma-glutamyl hydrolase precursor               | R.YYIAASYVK.Y                   | 1 | 2.33 | 0.28 | -3.61 |
| IPI00023728 | Gamma-glutamyl hydrolase precursor               | R.YYIAASYVK.Y                   | 2 | 3.10 | 0.35 | -2.25 |
| IPI00023728 | Gamma-glutamyl hydrolase precursor               | S.LELSRPHGDTAK.K                | 2 | 3.27 | 0.35 | -2.89 |
| IPI00023728 | Gamma-glutamyl hydrolase precursor               | V.PVRLDLTEKDYEILFK.S            | 3 | 5.14 | 0.41 | -3.74 |
| IPI00023751 | Growth/differentiation factor 8 precursor        | K.ALDENGHDLAVTFPGGEDGLNPFLEVK.V | 3 | 4.27 | 0.39 | -2.41 |
| IPI00023751 | Growth/differentiation factor 8 precursor        | K.IPAM*VVDR.C                   | 2 | 2.19 | 0.16 | -3.12 |
| IPI00023751 | Growth/differentiation factor 8 precursor        | K.M*SPINM*LYFNGK.E              | 2 | 2.92 | 0.40 | -2.34 |
| IPI00023751 | Growth/differentiation factor 8 precursor        | K.YPHTHLVHQANPR.G               | 2 | 3.04 | 0.40 | -4.45 |
| IPI00023751 | Growth/differentiation factor 8 precursor        | R.ELIDQYDVQR.D                  | 2 | 3.33 | 0.21 | -2.20 |
| IPI00023754 | Protein kinase C-binding protein NELL1 precursor | K.AFLFQDIER.E                   | 2 | 3.04 | 0.24 | -3.41 |
| IPI00023754 | Protein kinase C-binding protein NELL1 precursor | R.EIHAAPHVSEK.L                 | 2 | 2.75 | 0.34 | -4.30 |
| IPI00023780 | Isoform 2 of DnaJ homolog subfamily C member 5   | K.EINNAHAILDATKRNIYDK.Y         | 3 | 2.91 | 0.14 |       |
| IPI00023807 | Semaphorin-4D precursor                          | K.DHPLM*DDSVTPIDNRPR.L          | 3 | 2.93 | 0.24 | -2.54 |

|             |                                 |                                              |   |      |      |       |
|-------------|---------------------------------|----------------------------------------------|---|------|------|-------|
| IPI00023807 | Semaphorin-4D precursor         | K.YM*QSTTVEQSHTK.W                           | 2 | 4.18 | 0.49 | -4.39 |
| IPI00023807 | Semaphorin-4D precursor         | K.YM*QSTTVEQSHTK.W                           | 3 | 3.59 | 0.24 | -1.27 |
| IPI00023807 | Semaphorin-4D precursor         | R.FVYAGSNQVQAPLAFCGK.H                       | 2 | 5.93 | 0.60 | -4.09 |
| IPI00023807 | Semaphorin-4D precursor         | R.TEYAI PWLNEPSFVFADVIR.K                    | 2 | 4.40 | 0.53 | -3.76 |
| IPI00023807 | Semaphorin-4D precursor         | R.TEYAI PWLNEPSFVFADVIR.K                    | 3 | 5.11 | 0.53 | -4.59 |
| IPI00023807 | Semaphorin-4D precursor         | R.TQALDGTVDVM*FVSTDR.G                       | 2 | 5.04 | 0.59 | -4.36 |
| IPI00023814 | Isoform 1 of Neogenin precursor | E.PVDTLVSR.G                                 | 1 | 2.00 | 0.17 | -2.29 |
| IPI00023814 | Isoform 1 of Neogenin precursor | K.DGTFLNLVSDDR.R                             | 2 | 3.53 | 0.39 | -2.57 |
| IPI00023814 | Isoform 1 of Neogenin precursor | K.DGTFLNLVSDDRR.Q                            | 2 | 2.38 | 0.07 | -3.19 |
| IPI00023814 | Isoform 1 of Neogenin precursor | K.DVTVSK.E                                   | 1 | 2.35 | 0.20 | -3.44 |
| IPI00023814 | Isoform 1 of Neogenin precursor | K.EHNLQVLGLVK.S                              | 2 | 1.90 | 0.06 | -1.83 |
| IPI00023814 | Isoform 1 of Neogenin precursor | K.GM*GPM*SEAVQFR.T                           | 2 | 3.65 | 0.40 | -0.84 |
| IPI00023814 | Isoform 1 of Neogenin precursor | K.GTDKEQDQDVSSHYSYINGLKK.Y                   | 3 | 4.98 | 0.43 | -4.55 |
| IPI00023814 | Isoform 1 of Neogenin precursor | K.GTDKEQDQDVSSHYSYINGLKK.Y                   | 4 | 3.49 | 0.25 | -1.44 |
| IPI00023814 | Isoform 1 of Neogenin precursor | K.HGSGESSAPLRVETQPEVQLPGPAPNLR.A             | 3 | 4.99 | 0.51 | -4.82 |
| IPI00023814 | Isoform 1 of Neogenin precursor | K.IVKEHNLQVLGLVK.S                           | 2 | 4.84 | 0.45 | -4.98 |
| IPI00023814 | Isoform 1 of Neogenin precursor | K.IVKEHNLQVLGLVK.S                           | 3 | 3.01 | 0.25 | -3.47 |
| IPI00023814 | Isoform 1 of Neogenin precursor | K.KDGTFLNLVSDDRR.Q                           | 3 | 3.32 | 0.11 | -3.42 |
| IPI00023814 | Isoform 1 of Neogenin precursor | K.KYTEYSFR.V                                 | 2 | 2.05 | 0.15 | -2.69 |
| IPI00023814 | Isoform 1 of Neogenin precursor | K.LIVAGLPR.F                                 | 1 | 1.93 | 0.10 | -2.83 |
| IPI00023814 | Isoform 1 of Neogenin precursor | K.LIVAGLPR.F                                 | 2 | 2.47 | 0.17 | -3.36 |
| IPI00023814 | Isoform 1 of Neogenin precursor | K.NEEALDTESSER.L                             | 2 | 4.07 | 0.38 | -2.80 |
| IPI00023814 | Isoform 1 of Neogenin precursor | K.NGDM*VIPSDFYK.I                            | 1 | 2.89 | 0.33 | -4.65 |
| IPI00023814 | Isoform 1 of Neogenin precursor | K.NGDM*VIPSDFYK.I                            | 2 | 2.44 | 0.22 | -5.15 |
| IPI00023814 | Isoform 1 of Neogenin precursor | K.SDEGFYQCIAENDVGNQAQAGLIILEHAPATTGPLPSAPR.D | 4 | 4.27 | 0.32 | -5.46 |
| IPI00023814 | Isoform 1 of Neogenin precursor | K.SDVTETLVSGTQLSQLIEGLDR.G                   | 3 | 4.76 | 0.47 | -3.83 |
| IPI00023814 | Isoform 1 of Neogenin precursor | K.SDVTETLVSGTQLSQLIEGLDRGTEYNFR.V            | 3 | 4.62 | 0.41 | -4.51 |
| IPI00023814 | Isoform 1 of Neogenin precursor | K.SIM*IHWPAPATQNGQITGYK.I                    | 3 | 4.34 | 0.41 | -2.92 |
| IPI00023814 | Isoform 1 of Neogenin precursor | K.VLPDPEVISDLVFLK.Q                          | 2 | 4.11 | 0.41 | -5.32 |
| IPI00023814 | Isoform 1 of Neogenin precursor | K.VLPDPEVISDLVFLK.Q                          | 3 | 4.37 | 0.38 | -3.99 |
| IPI00023814 | Isoform 1 of Neogenin precursor | K.VLPDPEVISDLVFLKQPSPLVR.V                   | 2 | 4.28 | 0.54 | -4.44 |
| IPI00023814 | Isoform 1 of Neogenin precursor | K.VLPDPEVISDLVFLKQPSPLVR.V                   | 3 | 1.95 | 0.28 | -3.26 |
| IPI00023814 | Isoform 1 of Neogenin precursor | K.VLPDPEVISDLVFLKQPSPLVR.V                   | 4 | 4.57 | 0.43 | -3.23 |
| IPI00023814 | Isoform 1 of Neogenin precursor | K.YSDEVELK.V                                 | 1 | 2.00 | 0.10 | -4.14 |
| IPI00023814 | Isoform 1 of Neogenin precursor | K.YSDEVELK.V                                 | 2 | 2.96 | 0.23 | -2.37 |
| IPI00023814 | Isoform 1 of Neogenin precursor | K.YTEYSFR.V                                  | 1 | 1.72 | 0.10 | -2.71 |
| IPI00023814 | Isoform 1 of Neogenin precursor | K.YTEYSFR.V                                  | 2 | 2.08 | 0.19 | -1.50 |
| IPI00023814 | Isoform 1 of Neogenin precursor | L.PDPEVISDLVFLKQPSPLVR.V                     | 2 | 4.01 | 0.49 | -4.21 |
| IPI00023814 | Isoform 1 of Neogenin precursor | L.PDPEVISDLVFLKQPSPLVR.V                     | 3 | 4.36 | 0.47 | -3.63 |
| IPI00023814 | Isoform 1 of Neogenin precursor | R.CVVESGGPPK.Y                               | 1 | 2.35 | 0.19 | -3.81 |
| IPI00023814 | Isoform 1 of Neogenin precursor | R.CVVESGGPPK.Y                               | 2 | 3.18 | 0.36 | -2.28 |
| IPI00023814 | Isoform 1 of Neogenin precursor | R.CVVESGGPPKYSDEVELK.V                       | 2 | 4.17 | 0.33 | -2.22 |

|             |                                 |                                     |   |      |      |       |
|-------------|---------------------------------|-------------------------------------|---|------|------|-------|
| IPI00023814 | Isoform 1 of Neogenin precursor | R.CVVESGGPPKYSDEVELK.V              | 3 | 2.34 | 0.20 | -1.99 |
| IPI00023814 | Isoform 1 of Neogenin precursor | R.DVVASLVSTR.F                      | 1 | 2.30 | 0.35 | -3.26 |
| IPI00023814 | Isoform 1 of Neogenin precursor | R.DVVASLVSTR.F                      | 2 | 3.59 | 0.31 | -2.90 |
| IPI00023814 | Isoform 1 of Neogenin precursor | R.FTSQPEPSSVYAGNNAILNCEVNADLVPFVR.W | 3 | 4.30 | 0.39 | -4.46 |
| IPI00023814 | Isoform 1 of Neogenin precursor | R.GYAIGYGIGSPHAQTIK.V               | 2 | 5.45 | 0.52 | -3.34 |
| IPI00023814 | Isoform 1 of Neogenin precursor | R.GYAIGYGIGSPHAQTIK.V               | 3 | 2.20 | 0.35 | -2.62 |
| IPI00023814 | Isoform 1 of Neogenin precursor | R.GYAIGYGIGSPHAQTIKVDYK.Q           | 3 | 3.45 | 0.35 | -2.96 |
| IPI00023814 | Isoform 1 of Neogenin precursor | R.GYAIGYGIGSPHAQTIKVDYK.Q           | 4 | 2.72 | 0.18 | -2.86 |
| IPI00023814 | Isoform 1 of Neogenin precursor | R.ITWADNSLPK.H                      | 2 | 2.60 | 0.21 | -3.87 |
| IPI00023814 | Isoform 1 of Neogenin precursor | R.KSDVTETLVSGTQLSQLIEGLDR.G         | 2 | 5.11 | 0.40 | -3.36 |
| IPI00023814 | Isoform 1 of Neogenin precursor | R.KSDVTETLVSGTQLSQLIEGLDR.G         | 3 | 4.52 | 0.39 | -6.21 |
| IPI00023814 | Isoform 1 of Neogenin precursor | R.KSDVTETLVSGTQLSQLIEGLDRGTEYNFR.V  | 3 | 3.59 | 0.41 | -1.80 |
| IPI00023814 | Isoform 1 of Neogenin precursor | R.KSDVTETLVSGTQLSQLIEGLDRGTEYNFR.V  | 4 | 4.38 | 0.36 | -3.07 |
| IPI00023814 | Isoform 1 of Neogenin precursor | R.LPDLGSDYKPPM*SGNSP.H              | 2 | 4.45 | 0.52 | -3.94 |
| IPI00023814 | Isoform 1 of Neogenin precursor | R.LTHQIQELTLDTPYYFK.I               | 2 | 6.43 | 0.57 | -3.38 |
| IPI00023814 | Isoform 1 of Neogenin precursor | R.LTHQIQELTLDTPYYFK.I               | 3 | 3.93 | 0.30 | -3.58 |
| IPI00023814 | Isoform 1 of Neogenin precursor | R.QLLPDGSLFISNVVHSK.H               | 2 | 3.13 | 0.43 | -3.50 |
| IPI00023814 | Isoform 1 of Neogenin precursor | R.QLLPDGSLFISNVVHSK.H               | 3 | 2.48 | 0.25 | -2.26 |
| IPI00023814 | Isoform 1 of Neogenin precursor | R.QPLLLDDR.V                        | 2 | 1.71 | 0.09 | -2.79 |
| IPI00023814 | Isoform 1 of Neogenin precursor | R.RQLLPDGSLFISNVVHSK.H              | 3 | 5.28 | 0.40 | -2.44 |
| IPI00023814 | Isoform 1 of Neogenin precursor | R.SGSAPQSPGASIR.T                   | 2 | 3.35 | 0.26 | -1.66 |
| IPI00023814 | Isoform 1 of Neogenin precursor | R.TFTPFYFLVEPVDLSVR.G               | 2 | 6.26 | 0.52 | -5.69 |
| IPI00023814 | Isoform 1 of Neogenin precursor | R.TFTPFYFLVEPVDLSVR.G               | 3 | 5.24 | 0.39 | -5.51 |
| IPI00023814 | Isoform 1 of Neogenin precursor | R.TLSDVPSAAPQNLSEVR.N               | 2 | 4.52 | 0.44 | -2.96 |
| IPI00023814 | Isoform 1 of Neogenin precursor | R.TPASDPHGDNLTYSVFYTK.E             | 3 | 3.53 | 0.39 | -1.27 |
| IPI00023814 | Isoform 1 of Neogenin precursor | R.VENTSHPGEM*QVTIQNLM*PATVYIFR.V    | 3 | 4.03 | 0.16 | -4.96 |
| IPI00023814 | Isoform 1 of Neogenin precursor | R.VIGQDVVLPCVASGLPTPTIK.W           | 2 | 4.68 | 0.41 | -4.72 |
| IPI00023814 | Isoform 1 of Neogenin precursor | R.VIGQDVVLPCVASGLPTPTIK.W           | 3 | 5.05 | 0.42 | -4.84 |
| IPI00023814 | Isoform 1 of Neogenin precursor | R.VVAYNKHGPGVSTPDVAVR.T             | 3 | 3.01 | 0.45 | -3.45 |
| IPI00023814 | Isoform 1 of Neogenin precursor | R.YYTIENTLDPSSHYVITLK.A             | 3 | 3.42 | 0.33 | -1.63 |
| IPI00023824 | Fibulin-2 precursor             | K.CVDVNECETGVHR.C                   | 3 | 2.94 | 0.32 |       |
| IPI00023824 | Fibulin-2 precursor             | R.HCCVSYLQEK.S                      | 2 | 3.09 | 0.40 |       |
| IPI00023824 | Fibulin-2 precursor             | R.IGPAPAFTGDTIALNIIK.G              | 2 | 3.50 | 0.41 |       |
| IPI00023824 | Fibulin-2 precursor             | R.IGPAPAFTGDTIALNIIKGNEEGYFGR.R     | 3 | 4.56 | 0.41 |       |
| IPI00023824 | Fibulin-2 precursor             | R.RPPEAAAAPR.R                      | 2 | 2.62 | 0.16 | -2.06 |
| IPI00023845 | Kallikrein-6 precursor          | A.DGDFPDTIQCAYIHLVSR.E              | 2 | 4.72 | 0.47 | -2.82 |
| IPI00023845 | Kallikrein-6 precursor          | A.EEQNKLVHGGPCDK.T                  | 2 | 3.24 | 0.40 | -4.34 |
| IPI00023845 | Kallikrein-6 precursor          | F.PDTIQCAYIHLVSR.E                  | 2 | 3.59 | 0.39 | -2.63 |
| IPI00023845 | Kallikrein-6 precursor          | H.PDYDAASHDQDIM*LLR.L               | 2 | 4.26 | 0.44 | -1.96 |
| IPI00023845 | Kallikrein-6 precursor          | K.DSCQGDGGPLVCGDHLR.G               | 2 | 5.33 | 0.58 | -3.83 |
| IPI00023845 | Kallikrein-6 precursor          | K.DSCQGDGGPLVCGDHLR.G               | 3 | 2.92 | 0.34 | -3.76 |
| IPI00023845 | Kallikrein-6 precursor          | K.EKPGVYTNVCR.Y                     | 2 | 1.93 | 0.12 | -4.02 |



|             |                               |                                                 |   |      |      |       |
|-------------|-------------------------------|-------------------------------------------------|---|------|------|-------|
| IPI00023845 | Kallikrein-6 precursor        | K.KPNLQVFLGK.H                                  | 1 | 3.22 | 0.17 | -4.37 |
| IPI00023845 | Kallikrein-6 precursor        | K.KPNLQVFLGK.H                                  | 2 | 3.98 | 0.23 | -4.38 |
| IPI00023845 | Kallikrein-6 precursor        | K.LSELIQPLPLER.D                                | 2 | 4.09 | 0.33 | -4.44 |
| IPI00023845 | Kallikrein-6 precursor        | K.LSELIQPLPLER.D                                | 3 | 3.25 | 0.13 | -3.01 |
| IPI00023845 | Kallikrein-6 precursor        | K.LVHGGPCDK.T                                   | 2 | 2.13 | 0.10 | -0.20 |
| IPI00023845 | Kallikrein-6 precursor        | K.PNLQVFLGK.H                                   | 2 | 2.97 | 0.21 | -0.89 |
| IPI00023845 | Kallikrein-6 precursor        | K.TADGDFPDTIQCAYIHLVSR.E                        | 2 | 4.27 | 0.53 | -4.40 |
| IPI00023845 | Kallikrein-6 precursor        | K.TADGDFPDTIQCAYIHLVSR.E                        | 3 | 4.33 | 0.42 | -5.07 |
| IPI00023845 | Kallikrein-6 precursor        | K.TADGDFPDTIQCAYIHLVSREECEHAYPGQITQNM*LCAGDEK.Y | 5 | 4.00 | 0.29 | -2.40 |
| IPI00023845 | Kallikrein-6 precursor        | K.TSHPYQAALYTSQH.L                              | 2 | 3.80 | 0.50 | -2.74 |
| IPI00023845 | Kallikrein-6 precursor        | K.YGKDSCQGDSSGGPLVCGDHLR.G                      | 3 | 3.55 | 0.24 | -5.33 |
| IPI00023845 | Kallikrein-6 precursor        | Q.RESSQEQQSSVVR.A                               | 2 | 3.79 | 0.29 | -0.78 |
| IPI00023845 | Kallikrein-6 precursor        | R.AVIHPDYDAASHDQDIM*LLR.L                       | 2 | 4.75 | 0.56 | -4.57 |
| IPI00023845 | Kallikrein-6 precursor        | R.AVIHPDYDAASHDQDIM*LLR.L                       | 3 | 3.86 | 0.53 | -5.53 |
| IPI00023845 | Kallikrein-6 precursor        | R.AVIHPDYDAASHDQDIM*LLR.L                       | 4 | 3.80 | 0.46 | -3.90 |
| IPI00023845 | Kallikrein-6 precursor        | R.EECEHAYPGQITQN.M                              | 2 | 4.13 | 0.45 | -3.10 |
| IPI00023845 | Kallikrein-6 precursor        | R.EECEHAYPGQITQNM*LCAGDEK.Y                     | 2 | 4.63 | 0.57 | -2.55 |
| IPI00023845 | Kallikrein-6 precursor        | R.EECEHAYPGQITQNM*LCAGDEK.Y                     | 3 | 6.86 | 0.55 | -3.04 |
| IPI00023845 | Kallikrein-6 precursor        | R.ESSQEQQSSVVR.A                                | 1 | 1.78 | 0.08 | -2.63 |
| IPI00023845 | Kallikrein-6 precursor        | R.ESSQEQQSSVVR.A                                | 2 | 3.24 | 0.36 | -3.98 |
| IPI00023845 | Kallikrein-6 precursor        | R.GLVSWGNI PCGSK.E                              | 1 | 2.59 | 0.34 | -3.02 |
| IPI00023845 | Kallikrein-6 precursor        | R.GLVSWGNI PCGSK.E                              | 2 | 4.10 | 0.43 | -3.27 |
| IPI00023845 | Kallikrein-6 precursor        | R.QRESSQEQQSSVVR.A                              | 1 | 2.29 | 0.07 | -1.63 |
| IPI00023845 | Kallikrein-6 precursor        | R.QRESSQEQQSSVVR.A                              | 2 | 1.95 | 0.25 | -3.66 |
| IPI00023845 | Kallikrein-6 precursor        | R.QRESSQEQQSSVVR.A                              | 3 | 3.83 | 0.21 | -1.86 |
| IPI00023845 | Kallikrein-6 precursor        | R.YTNWIQK.T                                     | 1 | 2.47 | 0.18 | -2.44 |
| IPI00023845 | Kallikrein-6 precursor        | R.YTNWIQK.T                                     | 2 | 2.48 | 0.13 | -1.97 |
| IPI00023858 | Fc-gamma receptor IIIb        | K.DSGSYFCR.G                                    | 2 | 1.98 | 0.05 | -2.95 |
| IPI00023858 | Fc-gamma receptor IIIb        | K.VTYLQNGK.D                                    | 2 | 2.29 | 0.12 | -0.35 |
| IPI00023858 | Fc-gamma receptor IIIb        | K.VTYLQNGKDR.K                                  | 2 | 2.41 | 0.16 | -2.52 |
| IPI00023858 | Fc-gamma receptor IIIb        | S.VLEKDSVTLK.C                                  | 2 | 3.52 | 0.36 | -3.30 |
| IPI00023942 | Isoform 2 of Syndecan-3       | K.GARPGPGLLDNAIDSGSSAA.Q                        | 2 | 3.79 | 0.33 | -2.33 |
| IPI00023942 | Isoform 2 of Syndecan-3       | K.GARPGPGLLDNAIDSGSSAAQLPQK.S                   | 3 | 3.26 | 0.26 | -1.83 |
| IPI00024012 | Frizzled-7 precursor          | K.FGFQWPER.L                                    | 2 | 2.14 | 0.21 | -1.54 |
| IPI00024032 | TBC1 domain family, member 29 | R.VLNDGISLGLTPCLWDM*YLLEG.E                     | 2 | 3.16 | 0.21 | -0.96 |
| IPI00024034 | Cadherin-4 precursor          | K.AGFSEDDYTALISQNI LEGEK.L                      | 2 | 5.91 | 0.62 | -3.95 |
| IPI00024034 | Cadherin-4 precursor          | K.AGFSEDDYTALISQNI LEGEK.L                      | 3 | 5.36 | 0.36 | -2.88 |
| IPI00024034 | Cadherin-4 precursor          | K.AGFSEDDYTALISQNI LEGEKLLQVK.F                 | 3 | 6.34 | 0.57 | -4.33 |
| IPI00024034 | Cadherin-4 precursor          | K.GTQYETNSM*DFK.V                               | 2 | 3.71 | 0.43 | -3.11 |
| IPI00024034 | Cadherin-4 precursor          | K.VGADGTVFATR.E                                 | 1 | 2.30 | 0.27 | -2.85 |
| IPI00024034 | Cadherin-4 precursor          | K.VGADGTVFATR.E                                 | 2 | 3.53 | 0.38 | -4.15 |
| IPI00024034 | Cadherin-4 precursor          | R.IRSDKNDIPIR.Y                                 | 2 | 2.93 | 0.16 | -3.89 |

|             |                                   |                                       |   |      |      |       |
|-------------|-----------------------------------|---------------------------------------|---|------|------|-------|
| IPI00024034 | Cadherin-4 precursor              | R.LLVAQTSSPHSGHKPQK.G                 | 2 | 4.31 | 0.53 | -3.90 |
| IPI00024034 | Cadherin-4 precursor              | R.LLVAQTSSPHSGHKPQK.G                 | 3 | 2.47 | 0.15 | -3.50 |
| IPI00024035 | Isoform 1 of Cadherin-6 precursor | R.FLYLGPFK.D                          | 2 | 1.56 | 0.08 | -1.53 |
| IPI00024035 | Isoform 1 of Cadherin-6 precursor | R.IVVEDVDEPPVFSK.L                    | 2 | 3.55 | 0.33 | -3.26 |
| IPI00024035 | Isoform 1 of Cadherin-6 precursor | R.TSGFPAKK.R                          | 2 | 1.79 | 0.14 | -3.98 |
| IPI00024036 | Cadherin-8 precursor              | K.LVYSILEGQPYFSIEPETAIIK.T            | 2 | 4.55 | 0.46 | -4.63 |
| IPI00024036 | Cadherin-8 precursor              | K.LVYSILEGQPYFSIEPETAIIK.T            | 3 | 5.00 | 0.45 | -4.44 |
| IPI00024036 | Cadherin-8 precursor              | K.VEAVNHIDPR.F                        | 3 | 1.79 | 0.16 | -3.49 |
| IPI00024036 | Cadherin-8 precursor              | R.DPDITSSPIR.F                        | 2 | 3.41 | 0.30 | -3.04 |
| IPI00024036 | Cadherin-8 precursor              | R.QFNINADDGKITLATPLDR.E               | 3 | 4.04 | 0.31 | -3.44 |
| IPI00024046 | Cadherin-13 precursor             | A.EDLDCTPGFQK.V                       | 2 | 3.87 | 0.35 | -5.19 |
| IPI00024046 | Cadherin-13 precursor             | K.DIQGSLQDIFK.F                       | 1 | 3.44 | 0.23 | -3.90 |
| IPI00024046 | Cadherin-13 precursor             | K.DIQGSLQDIFK.F                       | 2 | 4.03 | 0.21 | -5.23 |
| IPI00024046 | Cadherin-13 precursor             | K.LRYEVSSPYFK.V                       | 2 | 3.22 | 0.35 | -2.48 |
| IPI00024046 | Cadherin-13 precursor             | K.LRYEVSSPYFK.V                       | 3 | 2.83 | 0.08 | -2.80 |
| IPI00024046 | Cadherin-13 precursor             | K.TLEGVPVPLEVIVIDQNDNRPIFR.E          | 2 | 2.97 | 0.23 | -2.11 |
| IPI00024046 | Cadherin-13 precursor             | K.TLEGVPVPLEVIVIDQNDNRPIFR.E          | 3 | 2.84 | 0.32 | -3.78 |
| IPI00024046 | Cadherin-13 precursor             | K.TLEGVPVPLEVIVIDQNDNRPIFR.E          | 4 | 5.51 | 0.35 | -2.49 |
| IPI00024046 | Cadherin-13 precursor             | K.TLFVHAR.T                           | 1 | 1.60 | 0.08 | -3.31 |
| IPI00024046 | Cadherin-13 precursor             | K.TLFVHAR.T                           | 2 | 2.24 | 0.20 | -4.75 |
| IPI00024046 | Cadherin-13 precursor             | K.VNSDGGLVALR.N                       | 1 | 2.52 | 0.29 | -3.11 |
| IPI00024046 | Cadherin-13 precursor             | K.VNSDGGLVALR.N                       | 2 | 4.21 | 0.30 | -2.96 |
| IPI00024046 | Cadherin-13 precursor             | R.DVGKVVDSDRPER.S                     | 2 | 2.78 | 0.23 | -1.70 |
| IPI00024046 | Cadherin-13 precursor             | R.DVGKVVDSDRPER.S                     | 3 | 2.55 | 0.16 | -1.96 |
| IPI00024046 | Cadherin-13 precursor             | R.INENTGSVSVTR.T                      | 1 | 2.15 | 0.27 | -4.66 |
| IPI00024046 | Cadherin-13 precursor             | R.INENTGSVSVTR.T                      | 2 | 4.20 | 0.39 | -3.15 |
| IPI00024046 | Cadherin-13 precursor             | R.M*TAFDADDPATDNALLR.Y                | 2 | 5.95 | 0.58 | -3.86 |
| IPI00024046 | Cadherin-13 precursor             | R.QQTPDKPSPNM*FYIDPEKGDIVTVVSPALLDR.E | 3 | 3.70 | 0.42 | -4.74 |
| IPI00024046 | Cadherin-13 precursor             | R.QQTPDKPSPNM*FYIDPEKGDIVTVVSPALLDR.E | 4 | 5.12 | 0.35 | -2.58 |
| IPI00024046 | Cadherin-13 precursor             | R.SIVVSPILIPENQR.Q                    | 2 | 3.84 | 0.40 | -4.39 |
| IPI00024046 | Cadherin-13 precursor             | R.TLDREVIAYVQLFVETTDVNGK.T            | 3 | 2.98 | 0.24 | -5.01 |
| IPI00024046 | Cadherin-13 precursor             | R.TLDREVIAYVQLFVETTDVNGK.T            | 4 | 4.93 | 0.46 | -2.40 |
| IPI00024046 | Cadherin-13 precursor             | R.TPHAEDM*AELVIVGGK.D                 | 2 | 3.98 | 0.38 | -5.29 |
| IPI00024046 | Cadherin-13 precursor             | R.TPHAEDM*AELVIVGGK.D                 | 3 | 4.07 | 0.28 | -2.96 |
| IPI00024046 | Cadherin-13 precursor             | R.TPHAEDM*AELVIVGGKDIQGSLQDIFK.F      | 3 | 3.34 | 0.29 | -2.36 |
| IPI00024046 | Cadherin-13 precursor             | R.TPHAEDM*AELVIVGGKDIQGSLQDIFK.F      | 4 | 4.13 | 0.35 | -4.10 |
| IPI00024046 | Cadherin-13 precursor             | R.YEVSSPYFK.V                         | 1 | 2.13 | 0.20 | -3.98 |
| IPI00024046 | Cadherin-13 precursor             | R.YEVSSPYFK.V                         | 2 | 2.91 | 0.34 | -4.88 |
| IPI00024048 | Cadherin-15 precursor             | K.TNEGVLSIVK.A                        | 2 | 2.73 | 0.21 | -1.97 |
| IPI00024048 | Cadherin-15 precursor             | K.VSVQNEAPLQAAALR.A                   | 2 | 3.85 | 0.16 |       |
| IPI00024048 | Cadherin-15 precursor             | R.DPDTEQLQR.L                         | 2 | 3.37 | 0.14 | -2.61 |
| IPI00024048 | Cadherin-15 precursor             | R.FSILQQGSPELFSIDELTGEIR.T            | 2 | 5.67 | 0.40 |       |

|             |                                                                                |                                           |   |      |      |       |
|-------------|--------------------------------------------------------------------------------|-------------------------------------------|---|------|------|-------|
| IPI00024048 | Cadherin-15 precursor                                                          | R.FSILQQGSPELFSIDELTGEIR.T                | 3 | 5.00 | 0.38 |       |
| IPI00024048 | Cadherin-15 precursor                                                          | R.VLEGAVPGTYVTR.A                         | 2 | 3.09 | 0.06 | -3.34 |
| IPI00024067 | Isoform 1 of Clathrin heavy chain 1                                            | K.WISLNTVALVTDNAVYHWSMEGESQPVK.M          | 3 | 2.49 | 0.14 | -2.44 |
| IPI00024067 | Isoform 1 of Clathrin heavy chain 1                                            | R.LDNYDAPDIANIAISNELFEEAFAIFR.K           | 2 | 2.59 | 0.49 | -2.27 |
| IPI00024067 | Isoform 1 of Clathrin heavy chain 1                                            | R.LDNYDAPDIANIAISNELFEEAFAIFR.K           | 3 | 4.38 | 0.44 | -0.11 |
| IPI00024094 | Rhesus blood group-associated glycoprotein                                     | K.NM*INADFSAATVLISFGAVLGK.T               | 3 | 3.24 | 0.30 | -4.69 |
| IPI00024094 | Rhesus blood group-associated glycoprotein                                     | K.NMINADFSAATVLISFGAVLGK.T                | 2 | 6.51 | 0.51 | -5.76 |
| IPI00024094 | Rhesus blood group-associated glycoprotein                                     | K.NMINADFSAATVLISFGAVLGK.T                | 3 | 5.32 | 0.42 | -5.16 |
| IPI00024094 | Rhesus blood group-associated glycoprotein                                     | M.QAAALGSSIGTAVVGGLMTGLILK.L              | 2 | 4.71 | 0.54 | -4.25 |
| IPI00024094 | Rhesus blood group-associated glycoprotein                                     | M.QAAALGSSIGTAVVGGLMTGLILK.L              | 3 | 4.33 | 0.42 | -4.84 |
| IPI00024094 | Rhesus blood group-associated glycoprotein                                     | R.IHDTCGVHNLHGLPGVVGGLAGIVAVAMGASNTSMAM.Q | 3 | 4.63 | 0.51 | -4.67 |
| IPI00024105 | Complement C1q tumor necrosis factor-related protein 5 precursor               | R.ASLQFDLVK.N                             | 2 | 3.18 | 0.17 | -1.60 |
| IPI00024105 | Complement C1q tumor necrosis factor-related protein 5 precursor               | R.VLVNEQGHYDAVTGK.F                       | 2 | 4.35 | 0.42 | -2.49 |
| IPI00024105 | Complement C1q tumor necrosis factor-related protein 5 precursor               | R.VPPPSDAPLPFDR.V                         | 2 | 2.15 | 0.30 | -3.34 |
| IPI00024107 | Isoform 1 of Alpha-synuclein                                                   | K.AKEGVVAAAEK.T                           | 2 | 2.05 | 0.05 | 2.33  |
| IPI00024129 | Peptidyl-prolyl cis-trans isomerase C                                          | K.GYGYK.G                                 | 1 | 1.35 | 0.11 | -2.39 |
| IPI00024129 | Peptidyl-prolyl cis-trans isomerase C                                          | K.TVENFVALATGEK.G                         | 2 | 4.40 | 0.43 | -4.10 |
| IPI00024129 | Peptidyl-prolyl cis-trans isomerase C                                          | K.TVENFVALATGEK.G                         | 3 | 4.03 | 0.22 | -3.39 |
| IPI00024129 | Peptidyl-prolyl cis-trans isomerase C                                          | R.IGDKDVGR.I                              | 2 | 2.67 | 0.18 | -3.83 |
| IPI00024129 | Peptidyl-prolyl cis-trans isomerase C                                          | R.VIKDFM*IQGGDITGDTGGVSIYGETFPDENFK.L     | 3 | 6.32 | 0.57 | -5.92 |
| IPI00024138 | Uncharacterized protein ENSP00000374816                                        | R.LLIYGASTR.A                             | 2 | 3.10 | 0.20 |       |
| IPI00024248 | Sodium/iodide cotransporter                                                    | K.KPPGFLPTNEDRLFGLGQK.E                   | 4 | 2.29 | 0.13 | -1.67 |
| IPI00024253 | Isoform 1 of Fibroblast growth factor 14                                       | K.FKESVFENYVIYSSM*LYR.Q                   | 2 | 2.92 | 0.06 | -6.76 |
| IPI00024272 | Integral membrane protein DGCR2/IDD precursor                                  | R.GGDPSHFHAVNVAQPVR.F                     | 3 | 3.47 | 0.24 | -2.85 |
| IPI00024273 | Isoform Long of Very low-density lipoprotein receptor precursor                | K.FLFNSDLREPASIAVDPLSGFVYWSDWGEPK.I       | 3 | 5.45 | 0.55 | -3.97 |
| IPI00024273 | Isoform Long of Very low-density lipoprotein receptor precursor                | K.FTGSELATLVNNLNDQAQDIIVYHELQPSGK.N       | 3 | 4.31 | 0.45 | -5.90 |
| IPI00024273 | Isoform Long of Very low-density lipoprotein receptor precursor                | K.SLEFLAHLPLALTIFEDR.V                    | 2 | 2.96 | 0.37 | -1.31 |
| IPI00024273 | Isoform Long of Very low-density lipoprotein receptor precursor                | K.SLEFLAHLPLALTIFEDR.V                    | 3 | 3.70 | 0.34 | -2.71 |
| IPI00024284 | Basement membrane-specific heparan sulfate proteoglycan core protein precursor | K.AFAHLQVPER.V                            | 2 | 2.24 | 0.31 | -2.01 |
| IPI00024284 | Basement membrane-specific heparan sulfate proteoglycan core protein precursor | K.AGFFGDAM*K.A                            | 2 | 2.52 | 0.18 | -2.88 |
| IPI00024284 | Basement membrane-specific heparan sulfate proteoglycan core protein precursor | K.AGLSSGFIGCVR.E                          | 2 | 3.74 | 0.44 | -4.16 |

|             |                                                                                |                                                |   |      |      |       |
|-------------|--------------------------------------------------------------------------------|------------------------------------------------|---|------|------|-------|
| IPI00024284 | Basement membrane-specific heparan sulfate proteoglycan core protein precursor | K.AVTLECVSAGEPR.S                              | 2 | 3.29 | 0.26 | -3.33 |
| IPI00024284 | Basement membrane-specific heparan sulfate proteoglycan core protein precursor | K.DFISLGLQDGHLVFR.Y                            | 2 | 4.72 | 0.49 | -3.06 |
| IPI00024284 | Basement membrane-specific heparan sulfate proteoglycan core protein precursor | K.DFISLGLQDGHLVFR.Y                            | 3 | 3.56 | 0.33 | -3.71 |
| IPI00024284 | Basement membrane-specific heparan sulfate proteoglycan core protein precursor | K.ESDQGAYTCEAM*NAR.G                           | 2 | 4.32 | 0.57 | -4.12 |
| IPI00024284 | Basement membrane-specific heparan sulfate proteoglycan core protein precursor | K.FQGLDLNEELYLGGYPDYGAIPK.A                    | 2 | 4.36 | 0.39 | -4.30 |
| IPI00024284 | Basement membrane-specific heparan sulfate proteoglycan core protein precursor | K.GSVYIGGAPDVATLTGGR.F                         | 2 | 5.28 | 0.50 | -2.65 |
| IPI00024284 | Basement membrane-specific heparan sulfate proteoglycan core protein precursor | K.IPGDQVSVVFIK.E                               | 2 | 3.90 | 0.47 | -2.71 |
| IPI00024284 | Basement membrane-specific heparan sulfate proteoglycan core protein precursor | K.ITFRPDSADGM*LLYNGQK.R                        | 3 | 4.02 | 0.19 | -2.35 |
| IPI00024284 | Basement membrane-specific heparan sulfate proteoglycan core protein precursor | K.LDGSLLPPDSR.L                                | 2 | 2.21 | 0.13 | -1.87 |
| IPI00024284 | Basement membrane-specific heparan sulfate proteoglycan core protein precursor | K.M*ASVGLSDIAM*DTTVTHATSHGR.A                  | 4 | 4.63 | 0.45 | -3.34 |
| IPI00024284 | Basement membrane-specific heparan sulfate proteoglycan core protein precursor | K.NLVLHSARPGAPPQPLDLQHR.A                      | 3 | 5.72 | 0.46 | -5.00 |
| IPI00024284 | Basement membrane-specific heparan sulfate proteoglycan core protein precursor | K.NLVLHSARPGAPPQPLDLQHR.A                      | 4 | 3.07 | 0.08 | -3.71 |
| IPI00024284 | Basement membrane-specific heparan sulfate proteoglycan core protein precursor | K.SGPVEDFVSLAM*VGGHLEFR.Y                      | 3 | 2.96 | 0.41 | -2.84 |
| IPI00024284 | Basement membrane-specific heparan sulfate proteoglycan core protein precursor | K.SPAYTLVWTR.L                                 | 2 | 3.73 | 0.49 | -1.90 |
| IPI00024284 | Basement membrane-specific heparan sulfate proteoglycan core protein precursor | K.VDSYGGSLR.Y                                  | 2 | 2.14 | 0.22 | -1.96 |
| IPI00024284 | Basement membrane-specific heparan sulfate proteoglycan core protein precursor | K.VGGHLRPGIVQSGGVVR.I                          | 2 | 2.94 | 0.34 | -4.64 |
| IPI00024284 | Basement membrane-specific heparan sulfate proteoglycan core protein precursor | K.VGGHLRPGIVQSGGVVR.I                          | 3 | 3.68 | 0.23 | -3.50 |
| IPI00024284 | Basement membrane-specific heparan sulfate proteoglycan core protein precursor | N.DAPGQYGAYFHDDGFLAFPGHVFSR.S                  | 3 | 5.78 | 0.52 | -4.18 |
| IPI00024284 | Basement membrane-specific heparan sulfate proteoglycan core protein precursor | R.AELLVTEAPSKPITVTVEEQR.S                      | 3 | 5.59 | 0.53 | -2.04 |
| IPI00024284 | Basement membrane-specific heparan sulfate proteoglycan core protein precursor | R.AM*DFNGILTIR.N                               | 2 | 3.32 | 0.34 | -1.98 |
| IPI00024284 | Basement membrane-specific heparan sulfate proteoglycan core protein precursor | R.AQLHGASEEPGHFSLTNAASTHTTNEGIFSPTGELGFSSFHR.L | 4 | 8.60 | 0.60 | -2.67 |

|             |                                                                                |                                                 |   |      |      |       |
|-------------|--------------------------------------------------------------------------------|-------------------------------------------------|---|------|------|-------|
| IPI00024284 | Basement membrane-specific heparan sulfate proteoglycan core protein precursor | R.AQLHGASEEPGHFSLTNAASTHTTNEGIFSPTPGELGFSSFHR.L | 5 | 4.79 | 0.34 | -4.77 |
| IPI00024284 | Basement membrane-specific heparan sulfate proteoglycan core protein precursor | R.ASYAQQPAESR.V                                 | 2 | 3.95 | 0.39 | -2.09 |
| IPI00024284 | Basement membrane-specific heparan sulfate proteoglycan core protein precursor | R.AVLHVHGGGGPR.V                                | 2 | 2.34 | 0.28 | -3.89 |
| IPI00024284 | Basement membrane-specific heparan sulfate proteoglycan core protein precursor | R.CLCLPGFSGPR.C                                 | 2 | 2.47 | 0.25 | -3.15 |
| IPI00024284 | Basement membrane-specific heparan sulfate proteoglycan core protein precursor | R.CVASNAYGVAQSVVNLVHGPPTVSVLPEGPVWVK.V          | 3 | 4.60 | 0.40 | -3.17 |
| IPI00024284 | Basement membrane-specific heparan sulfate proteoglycan core protein precursor | R.EDGRPVPSGTQQR.H                               | 2 | 1.78 | 0.10 | -3.02 |
| IPI00024284 | Basement membrane-specific heparan sulfate proteoglycan core protein precursor | R.EDGRPVPSGTQQR.H                               | 3 | 2.09 | 0.19 | -2.49 |
| IPI00024284 | Basement membrane-specific heparan sulfate proteoglycan core protein precursor | R.EHLLM*ALADLDELLIR.A                           | 3 | 3.69 | 0.27 | -3.24 |
| IPI00024284 | Basement membrane-specific heparan sulfate proteoglycan core protein precursor | R.EHLLM*ALAGIDTLLIR.A                           | 3 | 3.12 | 0.16 | -1.50 |
| IPI00024284 | Basement membrane-specific heparan sulfate proteoglycan core protein precursor | R.FDAGSGM*ATIR.H                                | 2 | 3.64 | 0.35 | -2.43 |
| IPI00024284 | Basement membrane-specific heparan sulfate proteoglycan core protein precursor | R.FLGDKVTSYGGELR.F                              | 2 | 4.18 | 0.41 | -2.61 |
| IPI00024284 | Basement membrane-specific heparan sulfate proteoglycan core protein precursor | R.FLGDKVTSYGGELR.F                              | 3 | 3.75 | 0.36 | -2.31 |
| IPI00024284 | Basement membrane-specific heparan sulfate proteoglycan core protein precursor | R.FSSGITGCVK.N                                  | 2 | 2.37 | 0.22 | -0.06 |
| IPI00024284 | Basement membrane-specific heparan sulfate proteoglycan core protein precursor | R.GHTPTQPGALNQR.Q                               | 2 | 3.14 | 0.44 | -3.64 |
| IPI00024284 | Basement membrane-specific heparan sulfate proteoglycan core protein precursor | R.GHTPTQPGALNQR.Q                               | 3 | 3.77 | 0.25 | -3.85 |
| IPI00024284 | Basement membrane-specific heparan sulfate proteoglycan core protein precursor | R.GM*LEPVQRPDVVLVAGAYR.L                        | 3 | 4.84 | 0.51 | -2.53 |
| IPI00024284 | Basement membrane-specific heparan sulfate proteoglycan core protein precursor | R.GM*VFGIPDGVLELVPQR.G                          | 2 | 3.76 | 0.46 | -4.76 |
| IPI00024284 | Basement membrane-specific heparan sulfate proteoglycan core protein precursor | R.GSIQVDGEELVSGR.S                              | 2 | 4.28 | 0.50 | -3.39 |
| IPI00024284 | Basement membrane-specific heparan sulfate proteoglycan core protein precursor | R.HLISTHFAPGDFQGFALVNPQR.N                      | 3 | 4.78 | 0.47 | -3.52 |
| IPI00024284 | Basement membrane-specific heparan sulfate proteoglycan core protein precursor | R.IAHVELADAGQYR.C                               | 2 | 3.39 | 0.35 | -2.44 |
| IPI00024284 | Basement membrane-specific heparan sulfate proteoglycan core protein precursor | R.IAHVELADAGQYR.C                               | 3 | 4.36 | 0.30 | -1.10 |

|             |                                                                                |                                  |   |      |      |       |
|-------------|--------------------------------------------------------------------------------|----------------------------------|---|------|------|-------|
| IPI00024284 | Basement membrane-specific heparan sulfate proteoglycan core protein precursor | R.ISSTPAKLEQR.T                  | 2 | 2.53 | 0.20 | -2.72 |
| IPI00024284 | Basement membrane-specific heparan sulfate proteoglycan core protein precursor | R.LDVEFKPLAPDGVLLFSGGK.S         | 2 | 5.51 | 0.53 | -4.44 |
| IPI00024284 | Basement membrane-specific heparan sulfate proteoglycan core protein precursor | R.LDVEFKPLAPDGVLLFSGGK.S         | 3 | 5.30 | 0.54 | -3.86 |
| IPI00024284 | Basement membrane-specific heparan sulfate proteoglycan core protein precursor | R.LEGDTLIIPR.V                   | 2 | 3.00 | 0.16 | -2.33 |
| IPI00024284 | Basement membrane-specific heparan sulfate proteoglycan core protein precursor | R.LENNM*LM*LPSVRPQDAGTYVCTATNR.Q | 3 | 3.83 | 0.37 | -3.30 |
| IPI00024284 | Basement membrane-specific heparan sulfate proteoglycan core protein precursor | R.LLQVTPADSGEYVCR.V              | 2 | 3.57 | 0.44 | -2.95 |
| IPI00024284 | Basement membrane-specific heparan sulfate proteoglycan core protein precursor | R.LLSGPFYFWSLPSR.F               | 2 | 3.88 | 0.38 | -4.33 |
| IPI00024284 | Basement membrane-specific heparan sulfate proteoglycan core protein precursor | R.LRSPVISIDPPSSTVQQGDASF.K       | 3 | 5.31 | 0.42 | -3.84 |
| IPI00024284 | Basement membrane-specific heparan sulfate proteoglycan core protein precursor | R.LSGSHSQGVAYPVR.I               | 2 | 3.88 | 0.48 | -2.30 |
| IPI00024284 | Basement membrane-specific heparan sulfate proteoglycan core protein precursor | R.LSGSHSQGVAYPVR.I               | 3 | 3.35 | 0.13 | -2.10 |
| IPI00024284 | Basement membrane-specific heparan sulfate proteoglycan core protein precursor | R.LYIFQASPADAGQYVCR.A            | 2 | 5.18 | 0.57 | -3.13 |
| IPI00024284 | Basement membrane-specific heparan sulfate proteoglycan core protein precursor | R.PGAPPPQPLDLQHR.A               | 3 | 4.11 | 0.39 | -1.39 |
| IPI00024284 | Basement membrane-specific heparan sulfate proteoglycan core protein precursor | R.QPDFISFGLVGRPEFR.F             | 3 | 2.32 | 0.33 | -1.62 |
| IPI00024284 | Basement membrane-specific heparan sulfate proteoglycan core protein precursor | R.RGSIQVDGEELVSGR.S              | 2 | 4.64 | 0.44 | -3.60 |
| IPI00024284 | Basement membrane-specific heparan sulfate proteoglycan core protein precursor | R.RGSIQVDGEELVSGR.S              | 3 | 3.56 | 0.31 | -3.32 |
| IPI00024284 | Basement membrane-specific heparan sulfate proteoglycan core protein precursor | R.SIEYSPQLEDAGSR.E               | 2 | 3.42 | 0.45 | -4.93 |
| IPI00024284 | Basement membrane-specific heparan sulfate proteoglycan core protein precursor | R.SIVPQGGSHSLR.C                 | 2 | 2.13 | 0.15 | -2.41 |
| IPI00024284 | Basement membrane-specific heparan sulfate proteoglycan core protein precursor | R.SLPEVPETIELEVR.T               | 2 | 3.41 | 0.37 | -5.17 |
| IPI00024284 | Basement membrane-specific heparan sulfate proteoglycan core protein precursor | R.SPGPNVAVNAK.G                  | 1 | 2.65 | 0.16 | -1.28 |
| IPI00024284 | Basement membrane-specific heparan sulfate proteoglycan core protein precursor | R.SPGPNVAVNAK.G                  | 2 | 3.53 | 0.43 | -1.17 |
| IPI00024284 | Basement membrane-specific heparan sulfate proteoglycan core protein precursor | R.SPVISIDPPSSTVQQGDASF.K         | 2 | 5.51 | 0.56 | -3.46 |

|             |                                                                                |                                                |   |      |      |       |
|-------------|--------------------------------------------------------------------------------|------------------------------------------------|---|------|------|-------|
| IPI00024284 | Basement membrane-specific heparan sulfate proteoglycan core protein precursor | R.SPVISIDPPSSTVQQGDASF.K                       | 3 | 3.91 | 0.29 | -4.24 |
| IPI00024284 | Basement membrane-specific heparan sulfate proteoglycan core protein precursor | R.SQPGSTPLHGQPLVVLQGNIILEHHVAQEPSGQPSTFIVPFR.E | 4 | 5.50 | 0.55 | -3.47 |
| IPI00024284 | Basement membrane-specific heparan sulfate proteoglycan core protein precursor | R.SQSVRPGADVTFICTAK.S                          | 3 | 3.52 | 0.32 | -1.83 |
| IPI00024284 | Basement membrane-specific heparan sulfate proteoglycan core protein precursor | R.SYEIM*FR.E                                   | 2 | 1.72 | 0.09 | -1.70 |
| IPI00024284 | Basement membrane-specific heparan sulfate proteoglycan core protein precursor | R.TCESLGAGGYR.C                                | 2 | 2.97 | 0.30 | -1.66 |
| IPI00024284 | Basement membrane-specific heparan sulfate proteoglycan core protein precursor | R.TPSGLYLGTCCER.C                              | 2 | 3.85 | 0.41 | -2.37 |
| IPI00024284 | Basement membrane-specific heparan sulfate proteoglycan core protein precursor | R.VAEGQTLDLK.C                                 | 2 | 3.07 | 0.23 | -2.28 |
| IPI00024284 | Basement membrane-specific heparan sulfate proteoglycan core protein precursor | R.VTVTSEGGR.G                                  | 2 | 2.85 | 0.22 | -2.82 |
| IPI00024284 | Basement membrane-specific heparan sulfate proteoglycan core protein precursor | R.VVPYFTQTPYSFLPLPTIK.D                        | 2 | 4.42 | 0.52 | -5.01 |
| IPI00024284 | Basement membrane-specific heparan sulfate proteoglycan core protein precursor | R.VVPYFTQTPYSFLPLPTIK.D                        | 3 | 4.10 | 0.35 | -4.56 |
| IPI00024284 | Basement membrane-specific heparan sulfate proteoglycan core protein precursor | R.YELGSGLAVLR.S                                | 1 | 1.57 | 0.13 | -2.30 |
| IPI00024284 | Basement membrane-specific heparan sulfate proteoglycan core protein precursor | R.YELGSGLAVLR.S                                | 2 | 3.18 | 0.25 | -3.22 |
| IPI00024284 | Basement membrane-specific heparan sulfate proteoglycan core protein precursor | R.YQLGSGEAR.L                                  | 1 | 2.01 | 0.23 | -3.10 |
| IPI00024284 | Basement membrane-specific heparan sulfate proteoglycan core protein precursor | R.YQLGSGEAR.L                                  | 2 | 3.05 | 0.24 | -4.65 |
| IPI00024307 | Ephrin-B1 precursor                                                            | K.FQEFSPNYM*GLEFK.K                            | 2 | 4.36 | 0.44 | -5.43 |
| IPI00024307 | Ephrin-B1 precursor                                                            | K.NLEPVSWSLNP.K.F                              | 2 | 2.95 | 0.14 | -3.57 |
| IPI00024346 | snRNA-activating protein complex subunit 3                                     | R.EDAAVAR.D                                    | 1 | 1.86 | 0.13 |       |
| IPI00024466 | UDP-glucose ceramide glucosyltransferase-like 1 isoform 1                      | K.IILFDVLFPLVVDK.F                             | 2 | 2.15 | 0.18 | -3.88 |
| IPI00024466 | UDP-glucose ceramide glucosyltransferase-like 1 isoform 1                      | R.IIGPLEDSELFNQDDFHLENIILK.T                   | 3 | 4.30 | 0.37 | -4.40 |
| IPI00024502 | Ubiquilin-4                                                                    | R.M*YTDIQEPMFSAAREQFGNPFSSLAGNSDSSSSQPLR.T     | 3 | 2.00 | 0.11 | 2.96  |
| IPI00024570 | Semaphorin-3G precursor                                                        | K.DYPDEVLQFAR.A                                | 2 | 3.72 | 0.37 | -3.88 |
| IPI00024570 | Semaphorin-3G precursor                                                        | K.M*TAQPGRPFSTK.D                              | 2 | 3.51 | 0.30 | -0.21 |
| IPI00024570 | Semaphorin-3G precursor                                                        | K.M*TAQPGRPFSTKDYDEVLQFAR.A                    | 3 | 4.06 | 0.42 | -4.06 |
| IPI00024570 | Semaphorin-3G precursor                                                        | K.M*TAQPGRPFSTKDYDEVLQFAR.A                    | 4 | 2.91 | 0.38 | -3.84 |
| IPI00024570 | Semaphorin-3G precursor                                                        | K.VIALQAGGSAEPEEVVLEELQVFK.V                   | 2 | 4.69 | 0.53 | -4.62 |
| IPI00024570 | Semaphorin-3G precursor                                                        | K.VIALQAGGSAEPEEVVLEELQVFK.V                   | 3 | 4.26 | 0.28 | -4.63 |

|             |                                                                        |                                      |   |      |      |       |
|-------------|------------------------------------------------------------------------|--------------------------------------|---|------|------|-------|
| IPI00024570 | Semaphorin-3G precursor                                                | K.VPTPITEM*EISVKR.Q                  | 3 | 2.43 | 0.31 | -1.28 |
| IPI00024570 | Semaphorin-3G precursor                                                | R.GEHLHLLEPGSVESGR.G                 | 2 | 4.83 | 0.37 | -3.97 |
| IPI00024570 | Semaphorin-3G precursor                                                | R.IPENSDQDNDKVYFFSETVPSDGGSNHVTVSR.V | 3 | 5.85 | 0.49 | -1.58 |
| IPI00024570 | Semaphorin-3G precursor                                                | R.IPENSDQDNDKVYFFSETVPSDGGSNHVTVSR.V | 4 | 4.92 | 0.36 | -3.25 |
| IPI00024570 | Semaphorin-3G precursor                                                | R.LDQAWPDPR.E                        | 2 | 2.07 | 0.05 | -3.16 |
| IPI00024570 | Semaphorin-3G precursor                                                | R.LFLGGLDALYSLR.L                    | 2 | 4.41 | 0.39 | -3.94 |
| IPI00024570 | Semaphorin-3G precursor                                                | R.LFLGGLDALYSLR.L                    | 3 | 3.22 | 0.08 | -2.68 |
| IPI00024570 | Semaphorin-3G precursor                                                | R.LVCSVPGPGGAETHFDQLEDVFLWPK.A       | 3 | 2.64 | 0.15 | -4.01 |
| IPI00024570 | Semaphorin-3G precursor                                                | R.SAIFLGPQGSLNLQAM*YLDEYRDR.L        | 3 | 2.72 | 0.18 | -3.15 |
| IPI00024570 | Semaphorin-3G precursor                                                | R.SDSQSLLDHPR.F                      | 2 | 2.81 | 0.33 | 0.20  |
| IPI00024572 | aspartate beta-hydroxylase isoform e                                   | D.LVDYEEVLAK.A                       | 2 | 3.39 | 0.31 | -3.12 |
| IPI00024572 | aspartate beta-hydroxylase isoform e                                   | K.LGIYDADGDGDFDVDDAK.V               | 2 | 6.23 | 0.56 | -5.18 |
| IPI00024572 | aspartate beta-hydroxylase isoform e                                   | K.LGIYDADGDGDFDVDDAK.V               | 3 | 4.80 | 0.31 | -2.52 |
| IPI00024580 | Methylcrotonoyl-CoA carboxylase subunit alpha, mitochondrial precursor | K.IIEEAPAPGIKSEVRK.K                 | 2 | 1.86 | 0.18 |       |
| IPI00024580 | Methylcrotonoyl-CoA carboxylase subunit alpha, mitochondrial precursor | R.NM*TLKDGKNNV.A                     | 1 | 1.82 | 0.17 | -2.91 |
| IPI00024587 | D1 dopamine receptor-interacting protein calcyon                       | L.AAIGAYPLSR.K                       | 1 | 2.28 | 0.29 | -3.45 |
| IPI00024587 | D1 dopamine receptor-interacting protein calcyon                       | L.AAIGAYPLSR.K                       | 2 | 3.02 | 0.37 | -1.73 |
| IPI00024587 | D1 dopamine receptor-interacting protein calcyon                       | R.SILAAIGAYPLSR.K                    | 1 | 3.34 | 0.39 | -2.80 |
| IPI00024587 | D1 dopamine receptor-interacting protein calcyon                       | R.SILAAIGAYPLSR.K                    | 2 | 4.49 | 0.42 | -4.51 |
| IPI00024587 | D1 dopamine receptor-interacting protein calcyon                       | R.SILAAIGAYPLSR.K                    | 3 | 3.49 | 0.30 | -3.82 |
| IPI00024587 | D1 dopamine receptor-interacting protein calcyon                       | S.ILAAIGAYPLSR.K                     | 2 | 3.45 | 0.28 | -2.24 |
| IPI00024601 | Carbonic anhydrase-related protein 10                                  | K.RQSPVNIETSHM*IFDPFLTPLR.I          | 3 | 3.77 | 0.19 | -2.66 |
| IPI00024601 | Carbonic anhydrase-related protein 10                                  | K.VSDSSNPFLNR.M                      | 2 | 3.85 | 0.35 | -3.48 |
| IPI00024601 | Carbonic anhydrase-related protein 10                                  | K.VSGTM*YNTGR.H                      | 2 | 2.82 | 0.26 | -2.83 |
| IPI00024601 | Carbonic anhydrase-related protein 10                                  | R.LLSQNQPSQIFLSM*SDNFRPVQPLNNR.C     | 3 | 5.24 | 0.46 | -2.49 |
| IPI00024601 | Carbonic anhydrase-related protein 10                                  | R.LLSQNQPSQIFLSM*SDNFRPVQPLNNR.C     | 4 | 4.44 | 0.34 | -1.73 |
| IPI00024601 | Carbonic anhydrase-related protein 10                                  | R.QSPVNIETSHM*IFDPFLTPLR.I           | 2 | 1.60 | 0.11 | -3.88 |
| IPI00024601 | Carbonic anhydrase-related protein 10                                  | R.QSPVNIETSHM*IFDPFLTPLR.I           | 3 | 2.96 | 0.23 | -3.20 |
| IPI00024601 | Carbonic anhydrase-related protein 10                                  | R.TNINFSLQGK.D                       | 2 | 3.19 | 0.36 | -2.56 |
| IPI00024621 | Isoform 1 of Olfactomedin-like protein 3 precursor                     | R.AALPYFPR.R                         | 2 | 1.75 | 0.15 | -1.37 |
| IPI00024621 | Isoform 1 of Olfactomedin-like protein 3 precursor                     | R.EALRTEADTISGR.V                    | 2 | 2.94 | 0.27 | -3.01 |
| IPI00024621 | Isoform 1 of Olfactomedin-like protein 3 precursor                     | R.EALRTEADTISGR.V                    | 3 | 2.10 | 0.18 |       |
| IPI00024621 | Isoform 1 of Olfactomedin-like protein 3 precursor                     | R.EVDYLETQNPALPCVEFDEK.V             | 2 | 2.85 | 0.34 |       |
| IPI00024621 | Isoform 1 of Olfactomedin-like protein 3 precursor                     | R.EVDYLETQNPALPCVEFDEKVTGGPGTK.G     | 3 | 4.59 | 0.21 |       |
| IPI00024621 | Isoform 1 of Olfactomedin-like protein 3 precursor                     | R.IQCSFDASGTLTPER.A                  | 2 | 4.25 | 0.40 | -2.61 |
| IPI00024621 | Isoform 1 of Olfactomedin-like protein 3 precursor                     | R.LAALR.L                            | 2 | 2.38 | 0.07 | -2.74 |
| IPI00024621 | Isoform 1 of Olfactomedin-like protein 3 precursor                     | R.LRDFTLAM*AAR.K                     | 3 | 3.62 | 0.09 | -3.36 |
| IPI00024621 | Isoform 1 of Olfactomedin-like protein 3 precursor                     | R.RLAALR.L                           | 2 | 2.48 | 0.07 | -1.95 |
| IPI00024621 | Isoform 1 of Olfactomedin-like protein 3 precursor                     | R.YGAHASLR.Y                         | 2 | 1.84 | 0.06 | -3.31 |
| IPI00024662 | Chromobox protein homolog 5                                            | R.GLEPEKIIGATDSCGDLMLMKWK.D          | 3 | 2.46 | 0.17 |       |



|             |                                                                   |                                        |   |      |      |       |
|-------------|-------------------------------------------------------------------|----------------------------------------|---|------|------|-------|
| IPI00024664 | Isoform Long of Ubiquitin carboxyl-terminal hydrolase 5           | R.AVDWIFSHIDDLDAEAMDISEGR.S            | 3 | 2.58 | 0.22 | -1.40 |
| IPI00024689 | Aquaporin-1                                                       | K.VWTSGQVEEYDLDDADDINSR.V              | 2 | 6.45 | 0.60 | -3.32 |
| IPI00024689 | Aquaporin-1                                                       | R.DLGGSAPLAIGLSVALGHLLAIDYTGCINPAR.S   | 3 | 5.93 | 0.59 | -6.33 |
| IPI00024704 | Uronyl 2-sulfotransferase                                         | K.VLPFPSQVVYNR.V                       | 2 | 2.32 | 0.29 | -1.71 |
| IPI00024704 | Uronyl 2-sulfotransferase                                         | R.FGGDQPVYINIIRDVPNR.F                 | 3 | 2.92 | 0.21 | -2.22 |
| IPI00024766 | Plexin-C1 precursor                                               | R.SLATQELGR.L                          | 2 | 3.03 | 0.21 | -1.85 |
| IPI00024802 | TATA-binding protein-associated factor 172                        | K.DGM*HHTVTK.H                         | 1 | 2.14 | 0.06 |       |
| IPI00024818 | Isoform 1 of Ubiquitin-specific peptidase-like protein 1          | K.SLVTFTNVIPEWHPLNAAHFGPCNNCNSKSIQRK.M | 5 | 3.48 | 0.21 | -4.42 |
| IPI00024825 | Isoform A of Proteoglycan-4 precursor                             | K.DQYYNIDVPSR.T                        | 2 | 3.28 | 0.28 | -4.14 |
| IPI00024825 | Isoform A of Proteoglycan-4 precursor                             | K.GFGGLTGQIVAALSTAK.Y                  | 2 | 4.45 | 0.45 | -3.93 |
| IPI00024825 | Isoform A of Proteoglycan-4 precursor                             | K.KAPPPSGASQTIK.S                      | 2 | 2.10 | 0.27 | -2.93 |
| IPI00024825 | Isoform A of Proteoglycan-4 precursor                             | R.CFESFER.G                            | 2 | 1.45 | 0.06 | -1.85 |
| IPI00024825 | Isoform A of Proteoglycan-4 precursor                             | R.FTNDIKDAGYPKPIFK.G                   | 3 | 2.99 | 0.31 | -4.63 |
| IPI00024825 | Isoform A of Proteoglycan-4 precursor                             | R.GLPNVVTSAISLPNIR.K                   | 2 | 2.72 | 0.25 |       |
| IPI00024825 | Isoform A of Proteoglycan-4 precursor                             | R.VCTAELSCK.G                          | 2 | 2.17 | 0.30 | -0.58 |
| IPI00024853 | Isoform 1 of Periaxin                                             | R.FGLVRAKEGAEEGEKAK.S                  | 2 | 3.68 | 0.08 |       |
| IPI00024887 | Bone morphogenetic protein 6 precursor                            | R.QQEEQQQQQLPR.G                       | 2 | 3.78 | 0.21 | -4.67 |
| IPI00024919 | Thioredoxin-dependent peroxide reductase, mitochondrial precursor | K.HLSVNDLPVGR.S                        | 2 | 2.64 | 0.36 | -4.11 |
| IPI00024919 | Thioredoxin-dependent peroxide reductase, mitochondrial precursor | R.DYGVLLLEGSLALR.G                     | 2 | 5.14 | 0.45 | -4.91 |
| IPI00024920 | ATP synthase subunit delta, mitochondrial precursor               | K.AQAELVGTADATR.A                      | 2 | 3.25 | 0.37 | -4.10 |
| IPI00024929 | Adipocyte adhesion molecule precursor                             | K.VVITYSSR.H                           | 2 | 1.88 | 0.38 | -1.88 |
| IPI00024929 | Adipocyte adhesion molecule precursor                             | R.IDYNHPGR.V                           | 2 | 2.65 | 0.16 | -2.85 |
| IPI00024929 | Adipocyte adhesion molecule precursor                             | R.VAFASNFLAGDASLQIEPLKPSDEGR.Y         | 3 | 4.46 | 0.40 | -3.27 |
| IPI00024966 | Contactin-2 precursor                                             | K.AGDKEAAADRVR.T                       | 2 | 2.71 | 0.06 | -1.86 |
| IPI00024966 | Contactin-2 precursor                                             | K.AGDKEAAADRVR.T                       | 3 | 2.98 | 0.30 | -1.12 |
| IPI00024966 | Contactin-2 precursor                                             | K.AQDAGVYQCLASNPVGTVVSRE               | 2 | 6.30 | 0.56 | -3.96 |
| IPI00024966 | Contactin-2 precursor                                             | K.AQDAGVYQCLASNPVGTVVSRE               | 3 | 5.42 | 0.46 | -2.72 |
| IPI00024966 | Contactin-2 precursor                                             | K.AVVVLSK.G                            | 2 | 2.20 | 0.10 | -2.38 |
| IPI00024966 | Contactin-2 precursor                                             | K.EATVLRGPPGPPGGVVVR.D                 | 3 | 2.70 | 0.32 | -1.53 |
| IPI00024966 | Contactin-2 precursor                                             | K.FAQLNLAEDTR.L                        | 1 | 2.52 | 0.23 | -2.49 |
| IPI00024966 | Contactin-2 precursor                                             | K.FAQLNLAEDTR.L                        | 2 | 4.65 | 0.42 | -3.04 |
| IPI00024966 | Contactin-2 precursor                                             | K.LSLEDSEGM*YQCVAENK.H                 | 2 | 4.84 | 0.46 | 1.12  |
| IPI00024966 | Contactin-2 precursor                                             | K.LSLEDSEGM*YQCVAENK.H                 | 3 | 3.09 | 0.15 | -2.51 |
| IPI00024966 | Contactin-2 precursor                                             | K.M*LYQNDLHPTLHLTGK.N                  | 2 | 4.82 | 0.54 | -4.02 |
| IPI00024966 | Contactin-2 precursor                                             | K.M*LYQNDLHPTLHLTGK.N                  | 3 | 3.92 | 0.40 | -4.00 |
| IPI00024966 | Contactin-2 precursor                                             | K.M*LYQNDLHPTLHLTGK.N                  | 4 | 2.80 | 0.35 | -2.48 |
| IPI00024966 | Contactin-2 precursor                                             | K.NWIEIPVPEDIGHALVQIR.T                | 2 | 4.38 | 0.46 | -4.44 |

|             |                       |                                     |   |      |      |       |
|-------------|-----------------------|-------------------------------------|---|------|------|-------|
| IPI00024966 | Contactin-2 precursor | K.NWIEIPVPEDIGHALVQIR.T             | 3 | 2.91 | 0.31 | -3.98 |
| IPI00024966 | Contactin-2 precursor | K.VISDTEADIGSNLR.W                  | 2 | 4.95 | 0.51 | -4.74 |
| IPI00024966 | Contactin-2 precursor | K.YTCFAENFM*GK.A                    | 2 | 3.57 | 0.46 | -2.84 |
| IPI00024966 | Contactin-2 precursor | K.YTCM*AQTVVDSASK.E                 | 2 | 5.12 | 0.57 | -2.72 |
| IPI00024966 | Contactin-2 precursor | K.YTCM*AQTVVDSASKEATVLR.G           | 3 | 2.62 | 0.29 | 0.39  |
| IPI00024966 | Contactin-2 precursor | R.ASPPATYR.W                        | 1 | 1.67 | 0.18 | -0.55 |
| IPI00024966 | Contactin-2 precursor | R.DIGDTTIQLSWSR.G                   | 2 | 4.83 | 0.50 | -5.22 |
| IPI00024966 | Contactin-2 precursor | R.EAAPSVAPSGLSGGGGAPGELIVNWTPM*SR.E | 2 | 4.97 | 0.57 | -4.79 |
| IPI00024966 | Contactin-2 precursor | R.EAAPSVAPSGLSGGGGAPGELIVNWTPM*SR.E | 3 | 4.23 | 0.44 | -4.30 |
| IPI00024966 | Contactin-2 precursor | R.EYQNGDGFYLLSFR.R                  | 2 | 4.77 | 0.47 | -3.67 |
| IPI00024966 | Contactin-2 precursor | R.EYQNGDGFYLLSFR.R                  | 3 | 3.17 | 0.09 | -2.56 |
| IPI00024966 | Contactin-2 precursor | R.FGFLQEFSK.E                       | 1 | 2.84 | 0.19 | -3.55 |
| IPI00024966 | Contactin-2 precursor | R.FGFLQEFSK.E                       | 2 | 3.45 | 0.26 | -2.43 |
| IPI00024966 | Contactin-2 precursor | R.FGFLQEFSKEER.D                    | 2 | 3.35 | 0.37 | -3.54 |
| IPI00024966 | Contactin-2 precursor | R.FGFLQEFSKEER.D                    | 3 | 2.94 | 0.31 | -1.99 |
| IPI00024966 | Contactin-2 precursor | R.FGFLQEFSKEERDPVK.A                | 2 | 4.18 | 0.46 | -6.56 |
| IPI00024966 | Contactin-2 precursor | R.FGFLQEFSKEERDPVK.A                | 4 | 2.57 | 0.28 | -2.30 |
| IPI00024966 | Contactin-2 precursor | R.GFDNHSPIAK.Y                      | 1 | 2.27 | 0.26 | -4.59 |
| IPI00024966 | Contactin-2 precursor | R.GFDNHSPIAK.Y                      | 2 | 2.82 | 0.37 | -2.04 |
| IPI00024966 | Contactin-2 precursor | R.GGEILIPCQPR.A                     | 1 | 2.16 | 0.09 | -3.92 |
| IPI00024966 | Contactin-2 precursor | R.GGEILIPCQPR.A                     | 2 | 3.29 | 0.06 | -2.32 |
| IPI00024966 | Contactin-2 precursor | R.GPPGPPGGVVVR.D                    | 1 | 2.59 | 0.34 | -2.49 |
| IPI00024966 | Contactin-2 precursor | R.GPPGPPGGVVVR.D                    | 2 | 2.98 | 0.20 | -0.56 |
| IPI00024966 | Contactin-2 precursor | R.HFVSQTTGNLYIAR.T                  | 2 | 4.79 | 0.50 | -2.61 |
| IPI00024966 | Contactin-2 precursor | R.HFVSQTTGNLYIAR.T                  | 3 | 3.59 | 0.41 | -1.81 |
| IPI00024966 | Contactin-2 precursor | R.HQLVGGNLVIM*NPTK.A                | 2 | 4.91 | 0.41 | -2.38 |
| IPI00024966 | Contactin-2 precursor | R.HQLVGGNLVIM*NPTK.A                | 3 | 2.72 | 0.09 | -1.47 |
| IPI00024966 | Contactin-2 precursor | R.IIVQAQPEWLK.V                     | 1 | 2.69 | 0.22 | -2.80 |
| IPI00024966 | Contactin-2 precursor | R.IIVQAQPEWLK.V                     | 2 | 4.18 | 0.38 | -2.92 |
| IPI00024966 | Contactin-2 precursor | R.NGEPLASQNR.V                      | 2 | 2.70 | 0.34 | -1.83 |
| IPI00024966 | Contactin-2 precursor | R.NGEPLASQNRVEVLADLR.F              | 2 | 3.03 | 0.17 | -1.40 |
| IPI00024966 | Contactin-2 precursor | R.NGEPLASQNRVEVLADLR.F              | 3 | 4.03 | 0.41 | -2.47 |
| IPI00024966 | Contactin-2 precursor | R.RGDGPESLTALVYSAEEEEPR.V           | 2 | 5.53 | 0.54 | 0.25  |
| IPI00024966 | Contactin-2 precursor | R.RGDGPESLTALVYSAEEEEPR.V           | 3 | 4.86 | 0.32 | -2.24 |
| IPI00024966 | Contactin-2 precursor | R.RPPGNISWTFSSSSLSIK.W              | 3 | 4.03 | 0.38 | -1.65 |
| IPI00024966 | Contactin-2 precursor | R.RTNVKETIGDLTILNAQLR.H             | 2 | 5.27 | 0.40 | -3.79 |
| IPI00024966 | Contactin-2 precursor | R.RTNVKETIGDLTILNAQLR.H             | 4 | 3.26 | 0.17 | -3.02 |
| IPI00024966 | Contactin-2 precursor | R.SDEGKYTCFAENFM*GK.A               | 3 | 2.30 | 0.11 | -1.50 |
| IPI00024966 | Contactin-2 precursor | R.TAGLDTSAR.V                       | 1 | 2.02 | 0.24 | -2.93 |
| IPI00024966 | Contactin-2 precursor | R.TAGLDTSAR.V                       | 2 | 2.81 | 0.20 | -2.96 |
| IPI00024966 | Contactin-2 precursor | R.TNPANIEGNAETAQVLGLTPWM*DYEFR.V    | 2 | 5.52 | 0.64 | -2.68 |
| IPI00024966 | Contactin-2 precursor | R.TNPANIEGNAETAQVLGLTPWM*DYEFR.V    | 3 | 6.13 | 0.49 | -4.37 |

|             |                                                     |                                      |   |      |      |       |
|-------------|-----------------------------------------------------|--------------------------------------|---|------|------|-------|
| IPI00024966 | Contactin-2 precursor                               | R.TNVKETIGDLTILNAQLR.H               | 2 | 6.36 | 0.53 | -3.51 |
| IPI00024966 | Contactin-2 precursor                               | R.TNVKETIGDLTILNAQLR.H               | 3 | 4.64 | 0.25 | -4.08 |
| IPI00024966 | Contactin-2 precursor                               | R.TREAAPSVAPSGLSGGGAPGELIVNWTPM*SR.E | 3 | 6.49 | 0.58 | -3.16 |
| IPI00024966 | Contactin-2 precursor                               | R.TTGPGGDGIPAEVHIVR.N                | 3 | 3.20 | 0.41 | -2.03 |
| IPI00024966 | Contactin-2 precursor                               | R.VEVLAGDLR.F                        | 1 | 2.30 | 0.08 | -3.45 |
| IPI00024966 | Contactin-2 precursor                               | R.VEVLAGDLR.F                        | 2 | 3.68 | 0.26 | -1.96 |
| IPI00024966 | Contactin-2 precursor                               | R.VIASNILGTGEPSPSSK.I                | 2 | 6.25 | 0.53 | -3.89 |
| IPI00024966 | Contactin-2 precursor                               | R.VIASNILGTGEPSPSSK.I                | 3 | 3.39 | 0.27 | -3.40 |
| IPI00024966 | Contactin-2 precursor                               | R.VSGLHPNTK.Y                        | 1 | 2.15 | 0.26 | -5.12 |
| IPI00024966 | Contactin-2 precursor                               | R.VSGLHPNTK.Y                        | 2 | 2.77 | 0.28 | -3.17 |
| IPI00024966 | Contactin-2 precursor                               | R.VTVTPDGTLIIR.N                     | 1 | 2.40 | 0.18 | -3.65 |
| IPI00024966 | Contactin-2 precursor                               | R.VTVTPDGTLIIR.N                     | 2 | 2.97 | 0.24 | -3.10 |
| IPI00024966 | Contactin-2 precursor                               | R.WLLNEFPNFIPTDGR.H                  | 2 | 4.66 | 0.49 | -6.44 |
| IPI00024966 | Contactin-2 precursor                               | R.WLLNEFPNFIPTDGR.H                  | 3 | 3.73 | 0.25 | -3.76 |
| IPI00024966 | Contactin-2 precursor                               | T.TGNLYIAR.T                         | 2 | 3.24 | 0.18 | -0.84 |
| IPI00024966 | Contactin-2 precursor                               | V.SQTTGNLYIAR.T                      | 2 | 3.32 | 0.40 | -1.55 |
| IPI00024966 | Contactin-2 precursor                               | W.IEIPVPEDIGHALVQIR.T                | 2 | 3.16 | 0.39 | -1.88 |
| IPI00024976 | Mitochondrial import receptor subunit TOM22 homolog | K.LQM*EQQQQLQQR.Q                    | 2 | 3.68 | 0.33 | -2.47 |
| IPI00024976 | Mitochondrial import receptor subunit TOM22 homolog | P.VVFETEKLM*EQQQQLQQR.Q              | 3 | 4.24 | 0.30 | -2.30 |
| IPI00025019 | Proteasome subunit beta type-1 precursor            | R.DVYTGDALR.I                        | 2 | 2.08 | 0.16 | -2.88 |
| IPI00025084 | Calpain small subunit 1                             | R.SM*VAVM*DSDTTGK.L                  | 2 | 3.93 | 0.43 | -2.70 |
| IPI00025092 | Myosin-binding protein C, slow-type                 | K.IILDGLDADNTVTVIAGNKLRLIPISEGPPPK.A | 3 | 3.54 | 0.08 |       |
| IPI00025094 | CDNA: FLJ22037 fis, clone HEP08868 (Fragment)       | K.EHQDRIEELEEELEAERAMRAKIEQNR.K      | 3 | 2.70 | 0.06 | -1.04 |
| IPI00025110 | Isoform 2 of Mesothelin precursor                   | K.ALLEVNKGHEM*SPQVATLIDR.F           | 4 | 2.92 | 0.14 | -2.96 |
| IPI00025110 | Isoform 2 of Mesothelin precursor                   | K.LDELYPQGYPESVIQHLGYLFLK.M          | 3 | 3.29 | 0.27 | -4.26 |
| IPI00025110 | Isoform 2 of Mesothelin precursor                   | K.LLGPHEGLK.A                        | 2 | 1.68 | 0.07 | -1.97 |
| IPI00025110 | Isoform 2 of Mesothelin precursor                   | K.LLGPHEGLKAEER.H                    | 2 | 3.96 | 0.41 | -1.89 |
| IPI00025110 | Isoform 2 of Mesothelin precursor                   | K.LRTDAVLPLTVAEVQK.L                 | 3 | 3.90 | 0.31 | -2.03 |
| IPI00025110 | Isoform 2 of Mesothelin precursor                   | R.EIDESLIFYK.K                       | 2 | 2.16 | 0.19 | -3.17 |
| IPI00025110 | Isoform 2 of Mesothelin precursor                   | R.QLDVLYPK.A                         | 1 | 2.02 | 0.06 | -3.26 |
| IPI00025110 | Isoform 2 of Mesothelin precursor                   | R.TDAVLPLTVAEVQK.L                   | 2 | 4.30 | 0.41 | 0.13  |
| IPI00025110 | Isoform 2 of Mesothelin precursor                   | R.VNAIPFYEQLDVLK.H                   | 2 | 3.36 | 0.25 | -2.92 |
| IPI00025204 | CD5 antigen-like precursor                          | K.GVWGSVCDDNWGEKEDQVVCK.Q            | 2 | 4.41 | 0.27 |       |
| IPI00025204 | CD5 antigen-like precursor                          | K.NTCNHDEDTWVECEDPFDLR.L             | 3 | 5.01 | 0.26 |       |
| IPI00025204 | CD5 antigen-like precursor                          | R.CSGEEQSLEQCQHR.F                   | 3 | 2.78 | 0.38 |       |
| IPI00025204 | CD5 antigen-like precursor                          | R.EATLQDCPSGPWGK.N                   | 2 | 2.63 | 0.26 |       |
| IPI00025204 | CD5 antigen-like precursor                          | R.ELGCGAASGTPSGILYEPPEAEKQK.V        | 2 | 4.24 | 0.36 |       |
| IPI00025204 | CD5 antigen-like precursor                          | R.ELGCGAASGTPSGILYEPPEAEKQK.V        | 3 | 3.86 | 0.43 |       |
| IPI00025204 | CD5 antigen-like precursor                          | R.LVGGDNLCSGR.L                      | 2 | 3.00 | 0.22 |       |
| IPI00025252 | Protein disulfide-isomerase A3 precursor            | A.SDVLELTDNDFESR.I                   | 2 | 5.03 | 0.47 | -3.75 |

|             |                                          |                                      |   |      |      |       |
|-------------|------------------------------------------|--------------------------------------|---|------|------|-------|
| IPI00025252 | Protein disulfide-isomerase A3 precursor | K.AASNLRDNYR.F                       | 2 | 2.56 | 0.11 | 0.31  |
| IPI00025252 | Protein disulfide-isomerase A3 precursor | K.DLLIAYYDVDEK.N                     | 2 | 4.84 | 0.46 | -3.74 |
| IPI00025252 | Protein disulfide-isomerase A3 precursor | K.FEDKTVAYTEQK.M                     | 3 | 3.31 | 0.11 | -1.13 |
| IPI00025252 | Protein disulfide-isomerase A3 precursor | K.FISDKDASIVGFFDDSFSEAHSEFLK.A       | 3 | 5.49 | 0.51 | -5.06 |
| IPI00025252 | Protein disulfide-isomerase A3 precursor | K.FISDKDASIVGFFDDSFSEAHSEFLK.A       | 4 | 3.49 | 0.21 | -2.98 |
| IPI00025252 | Protein disulfide-isomerase A3 precursor | K.FVM*QEEFSR.D                       | 2 | 2.76 | 0.20 | -3.28 |
| IPI00025252 | Protein disulfide-isomerase A3 precursor | K.IFRDGEEAGAYDGPR.T                  | 2 | 2.44 | 0.08 | -2.92 |
| IPI00025252 | Protein disulfide-isomerase A3 precursor | K.IFRDGEEAGAYDGPR.T                  | 3 | 4.17 | 0.19 | -1.94 |
| IPI00025252 | Protein disulfide-isomerase A3 precursor | K.LNFAVASR.K                         | 2 | 2.43 | 0.10 | -2.75 |
| IPI00025252 | Protein disulfide-isomerase A3 precursor | K.M*DATANDVPSPEVR.G                  | 2 | 5.08 | 0.41 | -4.30 |
| IPI00025252 | Protein disulfide-isomerase A3 precursor | K.RLAPEYEAATR.L                      | 2 | 3.50 | 0.41 | -2.81 |
| IPI00025252 | Protein disulfide-isomerase A3 precursor | K.SEPITESNDGPVK.V                    | 2 | 2.34 | 0.11 | -4.02 |
| IPI00025252 | Protein disulfide-isomerase A3 precursor | K.TFSHELSDFGLESTAGEIPVVAIR.T         | 3 | 3.51 | 0.33 | -3.16 |
| IPI00025252 | Protein disulfide-isomerase A3 precursor | K.TVAYTEQK.M                         | 2 | 2.71 | 0.15 | -2.43 |
| IPI00025252 | Protein disulfide-isomerase A3 precursor | K.YGVSGYPTLK.I                       | 1 | 1.96 | 0.15 | -0.49 |
| IPI00025252 | Protein disulfide-isomerase A3 precursor | K.YGVSGYPTLK.I                       | 2 | 3.24 | 0.39 | -0.85 |
| IPI00025252 | Protein disulfide-isomerase A3 precursor | K.YKELGEK.L                          | 1 | 2.20 | 0.09 | -1.62 |
| IPI00025252 | Protein disulfide-isomerase A3 precursor | R.DGEEAGAYDGPR.T                     | 2 | 3.86 | 0.41 | -1.21 |
| IPI00025252 | Protein disulfide-isomerase A3 precursor | R.EATNPPVIQEEKPK.K                   | 2 | 2.62 | 0.14 | -1.94 |
| IPI00025252 | Protein disulfide-isomerase A3 precursor | R.ELSDFISYLQR.E                      | 2 | 3.85 | 0.39 | -3.50 |
| IPI00025252 | Protein disulfide-isomerase A3 precursor | R.FAHTNVELVNEYDDNGEGIILFRPSHLTNK.F   | 3 | 4.84 | 0.34 | -0.85 |
| IPI00025252 | Protein disulfide-isomerase A3 precursor | R.FLQDYFDGNLKR.Y                     | 2 | 3.46 | 0.39 | -4.13 |
| IPI00025252 | Protein disulfide-isomerase A3 precursor | R.FLQDYFDGNLKR.Y                     | 3 | 2.17 | 0.19 | -1.29 |
| IPI00025252 | Protein disulfide-isomerase A3 precursor | R.GFPTIYFSPANK.K                     | 2 | 3.16 | 0.22 | -2.30 |
| IPI00025252 | Protein disulfide-isomerase A3 precursor | R.GFPTIYFSPANKK.L                    | 2 | 2.07 | 0.11 | -4.00 |
| IPI00025252 | Protein disulfide-isomerase A3 precursor | R.KTFSHELSDFGLESTAGEIPVVAIR.T        | 3 | 4.38 | 0.40 | -4.07 |
| IPI00025252 | Protein disulfide-isomerase A3 precursor | R.KTFSHELSDFGLESTAGEIPVVAIR.T        | 4 | 3.05 | 0.17 | -3.72 |
| IPI00025252 | Protein disulfide-isomerase A3 precursor | R.LAPEYEAATR.L                       | 2 | 3.26 | 0.31 | -3.17 |
| IPI00025252 | Protein disulfide-isomerase A3 precursor | R.LKGIVPLAK.V                        | 1 | 2.36 | 0.09 | -2.28 |
| IPI00025252 | Protein disulfide-isomerase A3 precursor | R.TADGIVSHLK.K                       | 2 | 1.84 | 0.13 | -2.04 |
| IPI00025257 | Semaphorin-7A precursor                  | K.AM*LVCSDAATNK.N                    | 2 | 3.70 | 0.41 | -2.66 |
| IPI00025257 | Semaphorin-7A precursor                  | K.AM*LVCSDAATNKFNRL                  | 2 | 4.22 | 0.44 | -3.73 |
| IPI00025257 | Semaphorin-7A precursor                  | K.AM*LVCSDAATNKFNRL                  | 3 | 2.65 | 0.27 | -2.11 |
| IPI00025257 | Semaphorin-7A precursor                  | K.ATIVHQDQAYDDK.I                    | 2 | 4.38 | 0.46 | -2.68 |
| IPI00025257 | Semaphorin-7A precursor                  | K.ATIVHQDQAYDDK.I                    | 3 | 2.81 | 0.29 | -3.19 |
| IPI00025257 | Semaphorin-7A precursor                  | K.ATIVHQDQAYDDKIYYFFR.E              | 2 | 5.94 | 0.48 | -5.49 |
| IPI00025257 | Semaphorin-7A precursor                  | K.ATIVHQDQAYDDKIYYFFR.E              | 3 | 4.80 | 0.48 | -4.65 |
| IPI00025257 | Semaphorin-7A precursor                  | K.ATIVHQDQAYDDKIYYFFR.E              | 4 | 4.76 | 0.44 | -4.54 |
| IPI00025257 | Semaphorin-7A precursor                  | K.CLDPQQPIPTETQVADR.H                | 2 | 3.93 | 0.42 | -4.27 |
| IPI00025257 | Semaphorin-7A precursor                  | K.GYHSSLPNPRPGK.C                    | 2 | 3.67 | 0.37 | -4.14 |
| IPI00025257 | Semaphorin-7A precursor                  | K.GYHSSLPNPRPGK.C                    | 3 | 2.73 | 0.27 | -5.17 |
| IPI00025257 | Semaphorin-7A precursor                  | K.LYVSSQWEVSQVPLDLCEVYGGGCHGCLM*SR.D | 3 | 3.45 | 0.26 | -2.68 |

|             |                                    |                                  |   |      |      |       |
|-------------|------------------------------------|----------------------------------|---|------|------|-------|
| IPI00025257 | Semaphorin-7A precursor            | K.TPLFHSK.Y                      | 2 | 2.53 | 0.07 | -2.40 |
| IPI00025257 | Semaphorin-7A precursor            | K.VSLAPNSR.Y                     | 2 | 1.77 | 0.07 | -3.80 |
| IPI00025257 | Semaphorin-7A precursor            | K.VVEPGEQEHSFANIM*EIQPFRR.R      | 2 | 4.37 | 0.53 | -2.05 |
| IPI00025257 | Semaphorin-7A precursor            | K.VVEPGEQEHSFANIM*EIQPFRR.R      | 3 | 4.48 | 0.38 | -4.22 |
| IPI00025257 | Semaphorin-7A precursor            | K.VVEPGEQEHSFANIM*EIQPFRR.A      | 3 | 2.19 | 0.20 | -2.87 |
| IPI00025257 | Semaphorin-7A precursor            | K.VVEPGEQEHSFANIM*EIQPFRR.A      | 4 | 1.89 | 0.19 | -3.16 |
| IPI00025257 | Semaphorin-7A precursor            | K.VYLDFDFPEGK.N                  | 2 | 3.75 | 0.39 | -3.95 |
| IPI00025257 | Semaphorin-7A precursor            | R.AAAIQTMSLDAER.R                | 2 | 3.96 | 0.45 | -3.31 |
| IPI00025257 | Semaphorin-7A precursor            | R.AAAIQTMSLDAERR.K               | 3 | 2.19 | 0.16 | -0.30 |
| IPI00025257 | Semaphorin-7A precursor            | R.CISYSSER.S                     | 1 | 2.08 | 0.20 | -1.87 |
| IPI00025257 | Semaphorin-7A precursor            | R.CISYSSER.S                     | 2 | 3.14 | 0.23 | -1.97 |
| IPI00025257 | Semaphorin-7A precursor            | R.DCENYITLLER.R                  | 2 | 4.39 | 0.40 | -4.91 |
| IPI00025257 | Semaphorin-7A precursor            | R.DPYCGWDQGR.C                   | 2 | 3.29 | 0.38 | -2.54 |
| IPI00025257 | Semaphorin-7A precursor            | R.EAQHWQLLPEDGIM*AEH.L           | 2 | 3.72 | 0.53 | -3.07 |
| IPI00025257 | Semaphorin-7A precursor            | R.GDQGGESSLSVSK.W                | 1 | 1.88 | 0.24 | -3.81 |
| IPI00025257 | Semaphorin-7A precursor            | R.GDQGGESSLSVSK.W                | 2 | 3.86 | 0.33 | -3.94 |
| IPI00025257 | Semaphorin-7A precursor            | R.GEELYTSDTVMS*QNPQFIK.A         | 2 | 5.75 | 0.57 | -4.13 |
| IPI00025257 | Semaphorin-7A precursor            | R.GEELYTSDTVMS*QNPQFIK.A         | 3 | 3.94 | 0.43 | -0.29 |
| IPI00025257 | Semaphorin-7A precursor            | R.GKVYLFDFPEGK.N                 | 2 | 4.19 | 0.45 | -4.63 |
| IPI00025257 | Semaphorin-7A precursor            | R.GKVYLFDFPEGK.N                 | 3 | 4.27 | 0.29 | -3.04 |
| IPI00025257 | Semaphorin-7A precursor            | R.GYAPFSPDENSLVLFEGDEVYSTIR.K    | 2 | 5.82 | 0.63 | -4.06 |
| IPI00025257 | Semaphorin-7A precursor            | R.GYAPFSPDENSLVLFEGDEVYSTIR.K    | 3 | 4.80 | 0.48 | -5.76 |
| IPI00025257 | Semaphorin-7A precursor            | R.GYAPFSPDENSLVLFEGDEVYSTIRK.Q   | 3 | 1.99 | 0.16 | -4.46 |
| IPI00025257 | Semaphorin-7A precursor            | R.IRGEELYTSDTVMS*QNPQFIK.A       | 2 | 4.54 | 0.49 | -4.94 |
| IPI00025257 | Semaphorin-7A precursor            | R.IRGEELYTSDTVMS*QNPQFIK.A       | 3 | 4.70 | 0.42 | -5.27 |
| IPI00025257 | Semaphorin-7A precursor            | R.LQDVFLLPDPSGQWR.D              | 2 | 4.58 | 0.39 | -3.55 |
| IPI00025257 | Semaphorin-7A precursor            | R.M*QASHGETFHVLYLTDDR.G          | 2 | 5.77 | 0.53 | -2.10 |
| IPI00025257 | Semaphorin-7A precursor            | R.M*QASHGETFHVLYLTDDR.G          | 3 | 5.54 | 0.51 | -3.26 |
| IPI00025257 | Semaphorin-7A precursor            | R.M*QASHGETFHVLYLTDDR.G          | 4 | 3.90 | 0.22 | -0.89 |
| IPI00025257 | Semaphorin-7A precursor            | R.RAAAIQTMSLDAER.R               | 2 | 2.05 | 0.20 | -4.99 |
| IPI00025257 | Semaphorin-7A precursor            | R.SEGLLACGTNAR.H                 | 1 | 2.23 | 0.29 | -0.50 |
| IPI00025257 | Semaphorin-7A precursor            | R.SEGLLACGTNAR.H                 | 2 | 4.57 | 0.48 | -2.00 |
| IPI00025257 | Semaphorin-7A precursor            | R.TVNIGSTK.G                     | 1 | 2.17 | 0.13 | -1.97 |
| IPI00025257 | Semaphorin-7A precursor            | R.VEPM*GPLKTPLFHSK.Y             | 2 | 2.06 | 0.17 | -3.15 |
| IPI00025257 | Semaphorin-7A precursor            | R.YYLSCPM*ESR.H                  | 2 | 3.08 | 0.40 | -0.29 |
| IPI00025276 | Isoform XB of Tenascin-X precursor | K.ADSIQGTAR.T                    | 2 | 2.62 | 0.12 | -2.79 |
| IPI00025276 | Isoform XB of Tenascin-X precursor | K.DAQQQPQAVPVAGDENEVTVPLDPDRK.Y  | 3 | 4.36 | 0.48 | -5.18 |
| IPI00025276 | Isoform XB of Tenascin-X precursor | K.DRDGQPQVVPVEGSLR.E             | 2 | 3.33 | 0.18 | -2.96 |
| IPI00025276 | Isoform XB of Tenascin-X precursor | K.DRDGQPQVVR.V                   | 2 | 2.76 | 0.15 | -1.99 |
| IPI00025276 | Isoform XB of Tenascin-X precursor | K.EEPPRPEFLEQPLLGETVTVGTPDSLRL.L | 3 | 4.72 | 0.49 | -4.73 |
| IPI00025276 | Isoform XB of Tenascin-X precursor | K.FLLFGIQDGKR.R                  | 3 | 2.81 | 0.23 | -2.06 |
| IPI00025276 | Isoform XB of Tenascin-X precursor | K.FLLYGLLGKRL.L                  | 2 | 2.62 | 0.26 | -4.41 |

|             |                                                    |                               |   |      |      |       |
|-------------|----------------------------------------------------|-------------------------------|---|------|------|-------|
| IPI00025276 | Isoform XB of Tenascin-X precursor                 | K.GFEFVSPFTEM*K.L             | 2 | 3.06 | 0.43 | -5.09 |
| IPI00025276 | Isoform XB of Tenascin-X precursor                 | K.LQGLIPGAR.Y                 | 2 | 2.58 | 0.17 | -0.45 |
| IPI00025276 | Isoform XB of Tenascin-X precursor                 | R.AVAVSGLDPAR.K               | 2 | 2.23 | 0.22 | -2.08 |
| IPI00025276 | Isoform XB of Tenascin-X precursor                 | R.AVAVSGLDPARK.Y              | 2 | 2.54 | 0.18 | -2.94 |
| IPI00025276 | Isoform XB of Tenascin-X precursor                 | R.AVPVAADQR.T                 | 1 | 1.32 | 0.05 | -3.11 |
| IPI00025276 | Isoform XB of Tenascin-X precursor                 | R.DAQGQPQAVPVSGDLR.A          | 2 | 4.23 | 0.48 | -3.68 |
| IPI00025276 | Isoform XB of Tenascin-X precursor                 | R.DCGEEM*QNGAGASR.T           | 2 | 4.24 | 0.46 | -4.16 |
| IPI00025276 | Isoform XB of Tenascin-X precursor                 | R.DRDPNLLISCAVS.YR.G          | 2 | 4.69 | 0.48 | -2.05 |
| IPI00025276 | Isoform XB of Tenascin-X precursor                 | R.DRDPNLLISCAVS.YR.G          | 3 | 2.96 | 0.24 | -2.36 |
| IPI00025276 | Isoform XB of Tenascin-X precursor                 | R.EVSVGLDPAHR.Y               | 2 | 2.12 | 0.21 | -1.35 |
| IPI00025276 | Isoform XB of Tenascin-X precursor                 | R.FGVPSPTLEPHRPLLQR.E         | 4 | 1.76 | 0.16 | -0.92 |
| IPI00025276 | Isoform XB of Tenascin-X precursor                 | R.FLLYGLSGR.K                 | 2 | 2.87 | 0.20 | -0.83 |
| IPI00025276 | Isoform XB of Tenascin-X precursor                 | R.FTLFGIANK.K                 | 2 | 2.71 | 0.30 | -1.24 |
| IPI00025276 | Isoform XB of Tenascin-X precursor                 | R.GFEESEPLTGFLTTPDGPTQLR.A    | 2 | 4.16 | 0.54 | -5.80 |
| IPI00025276 | Isoform XB of Tenascin-X precursor                 | R.HGPVPVEAR.T                 | 2 | 2.55 | 0.25 | -3.09 |
| IPI00025276 | Isoform XB of Tenascin-X precursor                 | R.LGPISADSTTAPLEK.E           | 2 | 3.54 | 0.47 | -4.15 |
| IPI00025276 | Isoform XB of Tenascin-X precursor                 | R.LGPLSAEGTTGLAPAGQTSEESRPR.L | 3 | 3.72 | 0.35 | -2.24 |
| IPI00025276 | Isoform XB of Tenascin-X precursor                 | R.LGQM*TVR.D                  | 2 | 2.10 | 0.14 | -2.95 |
| IPI00025276 | Isoform XB of Tenascin-X precursor                 | R.LGVLTVDTPDSM*R.L            | 2 | 3.86 | 0.58 | -1.48 |
| IPI00025276 | Isoform XB of Tenascin-X precursor                 | R.LNWEAPPGAFDSFLLR.F          | 2 | 3.89 | 0.41 | -1.45 |
| IPI00025276 | Isoform XB of Tenascin-X precursor                 | R.LSQLSVTDVTTSSLR.L           | 2 | 4.49 | 0.50 | -4.33 |
| IPI00025276 | Isoform XB of Tenascin-X precursor                 | R.LSWTVAAQGFDFSVVQYR.D        | 2 | 4.79 | 0.51 | -3.82 |
| IPI00025276 | Isoform XB of Tenascin-X precursor                 | R.SFVSSLDPDHKYR.F             | 3 | 2.12 | 0.12 | -1.20 |
| IPI00025276 | Isoform XB of Tenascin-X precursor                 | R.SGTLYSLTLYGLR.G             | 2 | 3.63 | 0.36 | -3.49 |
| IPI00025276 | Isoform XB of Tenascin-X precursor                 | R.TLSPVLES.PR.D               | 2 | 2.40 | 0.16 | -2.90 |
| IPI00025276 | Isoform XB of Tenascin-X precursor                 | R.TQKLQGLIPGAR.Y              | 2 | 1.71 | 0.20 | -2.25 |
| IPI00025276 | Isoform XB of Tenascin-X precursor                 | R.TSTIFLNGNR.E                | 2 | 3.20 | 0.30 | -3.04 |
| IPI00025276 | Isoform XB of Tenascin-X precursor                 | R.TVTVEDLEPGKK.Y              | 2 | 3.08 | 0.32 | -3.15 |
| IPI00025276 | Isoform XB of Tenascin-X precursor                 | R.VGGKESEVTVGGLEPGHK.Y        | 4 | 3.45 | 0.31 | -2.94 |
| IPI00025276 | Isoform XB of Tenascin-X precursor                 | R.VPGHEDGVTISGLEPDHKYK.M      | 3 | 4.68 | 0.44 | -0.46 |
| IPI00025276 | Isoform XB of Tenascin-X precursor                 | R.VPGHEDRVTISGLEPDNKYK.M      | 5 | 2.96 | 0.20 | -2.77 |
| IPI00025276 | Isoform XB of Tenascin-X precursor                 | R.VRGESEVTVGGLEPGRK.Y         | 2 | 3.83 | 0.37 | -1.22 |
| IPI00025276 | Isoform XB of Tenascin-X precursor                 | R.VRGESEVTVGGLEPGRK.Y         | 3 | 5.13 | 0.42 | -3.01 |
| IPI00025276 | Isoform XB of Tenascin-X precursor                 | R.YEVTVVSVR.G                 | 2 | 2.60 | 0.33 | -2.79 |
| IPI00025311 | Isoform 1 of Breast carcinoma-amplified sequence 1 | K.TITPPEPEPTGAPQK.G           | 2 | 2.37 | 0.29 | -4.14 |
| IPI00025318 | SH3 domain-binding glutamic acid-rich-like protein | R.ENNAVYAFLGLTAPPGSK.E        | 2 | 3.86 | 0.41 | -4.94 |
| IPI00025363 | Isoform 1 of Glial fibrillary acidic protein       | K.ALAAELNQLR.A                | 2 | 3.12 | 0.14 | -1.56 |
| IPI00025365 | Isoform Long of Endothelin-3 precursor             | K.ACLHFCTQTLDVSSNSR.T         | 3 | 2.94 | 0.19 | -5.18 |
| IPI00025426 | Pregnancy zone protein precursor                   | K.AGAFCLSEDAGLISSTASLR.A      | 2 | 6.45 | 0.50 |       |
| IPI00025426 | Pregnancy zone protein precursor                   | K.AGAFCLSEDAGLISSTASLR.A      | 3 | 4.78 | 0.28 |       |
| IPI00025426 | Pregnancy zone protein precursor                   | K.ATVLNLYLPK.C                | 2 | 3.01 | 0.26 |       |

|             |                                  |                                |   |      |      |       |
|-------------|----------------------------------|--------------------------------|---|------|------|-------|
| IPI00025426 | Pregnancy zone protein precursor | K.GSFALSFVESDVAPIAR.M          | 2 | 3.50 | 0.38 |       |
| IPI00025426 | Pregnancy zone protein precursor | K.M*VSGFIPLKPTVK.M             | 1 | 2.26 | 0.19 |       |
| IPI00025426 | Pregnancy zone protein precursor | K.M*VSGFIPLKPTVK.M             | 2 | 2.92 | 0.21 | -4.20 |
| IPI00025426 | Pregnancy zone protein precursor | R.AFQPFVVELTM*PYSVIR.G         | 2 | 4.15 | 0.46 | -5.03 |
| IPI00025426 | Pregnancy zone protein precursor | R.AFQPFVVELTM*PYSVIR.G         | 3 | 4.61 | 0.30 |       |
| IPI00025426 | Pregnancy zone protein precursor | R.AFQPFVVELTMPYSVIR.G          | 2 | 4.99 | 0.39 |       |
| IPI00025426 | Pregnancy zone protein precursor | R.AFQPFVVELTMPYSVIR.G          | 3 | 4.07 | 0.18 |       |
| IPI00025426 | Pregnancy zone protein precursor | R.NQGNTWLTAFVLK.T              | 2 | 3.93 | 0.37 | -1.44 |
| IPI00025426 | Pregnancy zone protein precursor | R.SSGSLLNNAIK.G                | 1 | 2.43 | 0.14 |       |
| IPI00025426 | Pregnancy zone protein precursor | R.SSGSLLNNAIK.G                | 2 | 3.25 | 0.23 | -1.71 |
| IPI00025426 | Pregnancy zone protein precursor | R.VVVQTESGGR.I                 | 2 | 2.42 | 0.32 | -0.62 |
| IPI00025426 | Pregnancy zone protein precursor | R.YGAATFTR.T                   | 1 | 2.12 | 0.22 |       |
| IPI00025426 | Pregnancy zone protein precursor | R.YGAATFTR.T                   | 2 | 2.41 | 0.20 | 1.23  |
| IPI00025447 | Elongation factor 1-alpha        | K.IGGIGTVPVGR.V                | 2 | 1.68 | 0.22 | -1.61 |
| IPI00025447 | Elongation factor 1-alpha        | K.STTTGHLIYK.C                 | 2 | 1.84 | 0.19 | -2.49 |
| IPI00025447 | Elongation factor 1-alpha        | R.VETGVLKPGM*VVFAPVNVTEVK.S    | 3 | 5.20 | 0.40 | -2.81 |
| IPI00025465 | Mimecan precursor                | I.EEIRLEGNPVILGK.H             | 2 | 2.97 | 0.22 | -2.57 |
| IPI00025465 | Mimecan precursor                | K.DFADIPNLR.R                  | 1 | 1.63 | 0.10 | -4.22 |
| IPI00025465 | Mimecan precursor                | K.DFADIPNLR.R                  | 2 | 3.34 | 0.26 | -2.21 |
| IPI00025465 | Mimecan precursor                | K.EKETVIIPNEK.S                | 1 | 3.53 | 0.28 | -3.43 |
| IPI00025465 | Mimecan precursor                | K.EKETVIIPNEK.S                | 2 | 3.29 | 0.24 | -4.27 |
| IPI00025465 | Mimecan precursor                | K.ESAYLYAR.F                   | 1 | 2.10 | 0.18 | -3.22 |
| IPI00025465 | Mimecan precursor                | K.ESAYLYAR.F                   | 2 | 1.94 | 0.25 | -2.76 |
| IPI00025465 | Mimecan precursor                | K.ETVIIPNEK.S                  | 1 | 2.73 | 0.18 | -4.15 |
| IPI00025465 | Mimecan precursor                | K.ETVIIPNEK.S                  | 2 | 2.31 | 0.12 | -2.78 |
| IPI00025465 | Mimecan precursor                | K.KLNNLFLYLDHNALESVPLNLPESLR.V | 2 | 4.85 | 0.63 | -5.64 |
| IPI00025465 | Mimecan precursor                | K.KLNNLFLYLDHNALESVPLNLPESLR.V | 3 | 6.11 | 0.55 | -5.46 |
| IPI00025465 | Mimecan precursor                | K.KLNNLFLYLDHNALESVPLNLPESLR.V | 4 | 2.45 | 0.18 | -4.13 |
| IPI00025465 | Mimecan precursor                | K.KLTAKDFADIPNLR.R             | 2 | 3.27 | 0.29 | -4.08 |
| IPI00025465 | Mimecan precursor                | K.LNNLFLYLDHNALESVPLNLPESLR.V  | 2 | 5.30 | 0.55 | -4.03 |
| IPI00025465 | Mimecan precursor                | K.LNNLFLYLDHNALESVPLNLPESLR.V  | 3 | 3.60 | 0.30 | -4.93 |
| IPI00025465 | Mimecan precursor                | K.LPVLPPK.L                    | 1 | 1.50 | 0.06 | -1.63 |
| IPI00025465 | Mimecan precursor                | K.LPVLPPK.LTFNAK.Y             | 2 | 2.57 | 0.27 | -3.94 |
| IPI00025465 | Mimecan precursor                | K.LPVLPPK.LTFNAK.Y             | 3 | 4.18 | 0.40 | -3.00 |
| IPI00025465 | Mimecan precursor                | K.LSLEELSLAENQLL.K             | 2 | 2.91 | 0.19 | -4.04 |
| IPI00025465 | Mimecan precursor                | K.LSLEELSLAENQLL.K             | 1 | 2.29 | 0.44 | -2.06 |
| IPI00025465 | Mimecan precursor                | K.LSLEELSLAENQLL.K             | 2 | 5.94 | 0.43 | -7.45 |
| IPI00025465 | Mimecan precursor                | K.LSLEELSLAENQLL.K             | 3 | 5.28 | 0.37 | -4.37 |
| IPI00025465 | Mimecan precursor                | K.LSLEELSLAENQLLKLPLPPK.L      | 2 | 5.59 | 0.61 | -5.18 |
| IPI00025465 | Mimecan precursor                | K.LSLEELSLAENQLLKLPLPPK.L      | 3 | 8.11 | 0.64 | -5.43 |
| IPI00025465 | Mimecan precursor                | K.LSLEELSLAENQLLKLPLPPK.L      | 4 | 5.91 | 0.64 | -4.20 |
| IPI00025465 | Mimecan precursor                | K.LTAKDFADIPNLR.R              | 2 | 4.11 | 0.40 | -3.33 |

|             |                                                              |                                         |   |      |      |       |
|-------------|--------------------------------------------------------------|-----------------------------------------|---|------|------|-------|
| IPI00025465 | Mimecan precursor                                            | K.LTAKDFADIPNLR.R                       | 3 | 3.58 | 0.12 | -2.23 |
| IPI00025465 | Mimecan precursor                                            | K.LTAKDFADIPNLR.L                       | 2 | 2.24 | 0.20 | -2.12 |
| IPI00025465 | Mimecan precursor                                            | K.LTAKDFADIPNLR.L                       | 3 | 1.96 | 0.19 | -0.26 |
| IPI00025465 | Mimecan precursor                                            | K.LTAKDFADIPNLR.L                       | 4 | 2.70 | 0.34 | -2.35 |
| IPI00025465 | Mimecan precursor                                            | K.NIKEKETVIIPNEK.S                      | 2 | 4.44 | 0.33 | -3.70 |
| IPI00025465 | Mimecan precursor                                            | K.NIKEKETVIIPNEK.S                      | 3 | 4.04 | 0.17 | -3.08 |
| IPI00025465 | Mimecan precursor                                            | K.RLPIGSYF.-                            | 1 | 2.03 | 0.26 | -2.56 |
| IPI00025465 | Mimecan precursor                                            | K.RLPIGSYF.-                            | 2 | 2.19 | 0.17 | -2.40 |
| IPI00025465 | Mimecan precursor                                            | L.AENQLLKLPVLPK.L                       | 2 | 3.17 | 0.28 | -1.39 |
| IPI00025465 | Mimecan precursor                                            | L.EELSLAENQLLKLPVLPK.L                  | 2 | 3.43 | 0.29 | -3.56 |
| IPI00025465 | Mimecan precursor                                            | L.SLAENQLLKLPVLPK.L                     | 2 | 3.26 | 0.38 | -1.52 |
| IPI00025465 | Mimecan precursor                                            | L.SLLEELSLAENQLLK.L                     | 2 | 4.84 | 0.37 | -4.83 |
| IPI00025465 | Mimecan precursor                                            | L.SLLEELSLAENQLLK.L                     | 3 | 4.13 | 0.25 | -2.45 |
| IPI00025465 | Mimecan precursor                                            | L.SLLEELSLAENQLLKLPVLPK.L               | 3 | 4.99 | 0.54 | -3.94 |
| IPI00025465 | Mimecan precursor                                            | N.IKEKETVIIPNEK.S                       | 2 | 4.30 | 0.33 | -3.63 |
| IPI00025465 | Mimecan precursor                                            | R.DRIEEIRLEGNPVIGK.H                    | 2 | 4.06 | 0.46 | -2.41 |
| IPI00025465 | Mimecan precursor                                            | R.DRIEEIRLEGNPVIGK.H                    | 3 | 3.08 | 0.36 | -1.92 |
| IPI00025465 | Mimecan precursor                                            | R.IEEIRLEGNPVIGK.H                      | 2 | 3.62 | 0.36 | -3.52 |
| IPI00025465 | Mimecan precursor                                            | R.IEEIRLEGNPVIGK.H                      | 3 | 4.79 | 0.35 | -2.04 |
| IPI00025465 | Mimecan precursor                                            | R.IEEIRLEGNPVIGKHPNSFICK.R              | 3 | 5.51 | 0.34 | -3.90 |
| IPI00025465 | Mimecan precursor                                            | R.IEEIRLEGNPVIGKHPNSFICK.R              | 4 | 4.32 | 0.41 | -3.15 |
| IPI00025465 | Mimecan precursor                                            | R.LDFTGNLIEDIEDGTFSK.L                  | 2 | 5.45 | 0.51 | -6.34 |
| IPI00025465 | Mimecan precursor                                            | R.LDFTGNLIEDIEDGTFSK.L                  | 3 | 6.29 | 0.50 | -1.73 |
| IPI00025465 | Mimecan precursor                                            | R.LEGNPVLGK.H                           | 1 | 2.36 | 0.20 | -3.40 |
| IPI00025465 | Mimecan precursor                                            | R.LEGNPVLGK.H                           | 2 | 3.42 | 0.19 | -3.05 |
| IPI00025465 | Mimecan precursor                                            | R.LEGNPVLGKHPNSFICK.R                   | 3 | 3.19 | 0.38 | -3.89 |
| IPI00025465 | Mimecan precursor                                            | R.LEGNPVLGKHPNSFICK.R                   | 4 | 2.95 | 0.28 | -2.89 |
| IPI00025465 | Mimecan precursor                                            | R.RLDFTGNLIEDIEDGTFSK.L                 | 2 | 5.99 | 0.58 | -5.46 |
| IPI00025465 | Mimecan precursor                                            | R.RLDFTGNLIEDIEDGTFSK.L                 | 3 | 6.62 | 0.47 | -5.37 |
| IPI00025465 | Mimecan precursor                                            | R.RLDFTGNLIEDIEDGTFSKLSLLEELSLAENQLLK.L | 3 | 5.33 | 0.48 | -1.11 |
| IPI00025465 | Mimecan precursor                                            | V.PLNLPESLR.V                           | 1 | 2.74 | 0.18 | -4.12 |
| IPI00025473 | Beta-1,4 N-acetylgalactosaminyltransferase 1                 | R.SYQNTADTVR.F                          | 2 | 2.77 | 0.19 |       |
| IPI00025476 | Pancreatic alpha-amylase precursor                           | K.IAEYM*NHLIDIGVAGFR.L                  | 3 | 2.98 | 0.26 | -1.59 |
| IPI00025476 | Pancreatic alpha-amylase precursor                           | K.IYVSDDGK.A                            | 2 | 1.94 | 0.07 | -1.69 |
| IPI00025476 | Pancreatic alpha-amylase precursor                           | K.TGSGDIENYNDATQVR.D                    | 2 | 4.75 | 0.47 | -2.44 |
| IPI00025476 | Pancreatic alpha-amylase precursor                           | R.YQPVSYK.L                             | 1 | 1.65 | 0.16 | -6.51 |
| IPI00025499 | Isoform Tau-F of Microtubule-associated protein tau          | R.HLSNVSSSTGSIDMVDSPQLATLADEVASLAK.Q    | 3 | 4.95 | 0.33 | -2.12 |
| IPI00025622 | AN1-type zinc finger protein 5                               | R.M*SPM*GTASGSNSPTSDSASVQR.A            | 3 | 3.60 | 0.42 | -1.58 |
| IPI00025647 | Isoform 1 of F-box only protein 21                           | R.HPSLAFK.A                             | 1 | 1.78 | 0.13 | -3.83 |
| IPI00025700 | Isoform CD6A of T-cell differentiation antigen CD6 precursor | R.VTCAENR.A                             | 2 | 2.15 | 0.05 | 1.74  |



|             |                                                                        |                                           |   |      |      |       |
|-------------|------------------------------------------------------------------------|-------------------------------------------|---|------|------|-------|
| IPI00025809 | Alpha-1,6-mannosyl-glycoprotein 2-beta-N-acetylglucosaminyltransferase | K.FTVVAISPPRK.N                           | 3 | 2.88 | 0.22 | -3.45 |
| IPI00025809 | Alpha-1,6-mannosyl-glycoprotein 2-beta-N-acetylglucosaminyltransferase | K.NEALAPPLLDAEPAR.G                       | 2 | 3.08 | 0.29 | -2.25 |
| IPI00025809 | Alpha-1,6-mannosyl-glycoprotein 2-beta-N-acetylglucosaminyltransferase | K.VLVPQIPR.I                              | 2 | 2.02 | 0.12 | -2.00 |
| IPI00025809 | Alpha-1,6-mannosyl-glycoprotein 2-beta-N-acetylglucosaminyltransferase | R.SFYGM*ADKV DVK.T                        | 2 | 2.32 | 0.12 | -2.35 |
| IPI00025812 | Carbonic anhydrase-related protein 11 precursor                        | R.LLSQNPPSQIFQSLSGNSRPLQPLAHR.A           | 3 | 3.65 | 0.40 | -4.41 |
| IPI00025812 | Carbonic anhydrase-related protein 11 precursor                        | R.LLSQNPPSQIFQSLSGNSRPLQPLAHR.A           | 4 | 4.43 | 0.40 | -1.87 |
| IPI00025812 | Carbonic anhydrase-related protein 11 precursor                        | R.VLYDPFLPPLR.L                           | 2 | 3.43 | 0.47 | -3.54 |
| IPI00025818 | Isoform 1 of Polypeptide N-acetylgalactosaminyltransferase 1           | K.ATEEDSQVPSIR.D                          | 2 | 3.12 | 0.37 | -2.85 |
| IPI00025818 | Isoform 1 of Polypeptide N-acetylgalactosaminyltransferase 1           | K.GNQLWEYDPVK.L                           | 2 | 2.66 | 0.18 | -1.86 |
| IPI00025818 | Isoform 1 of Polypeptide N-acetylgalactosaminyltransferase 1           | K.NFFYIISPGVTK.V                          | 2 | 4.36 | 0.34 | -2.33 |
| IPI00025818 | Isoform 1 of Polypeptide N-acetylgalactosaminyltransferase 1           | K.VDYGDISSR.V                             | 1 | 1.37 | 0.17 | -4.64 |
| IPI00025818 | Isoform 1 of Polypeptide N-acetylgalactosaminyltransferase 1           | K.VDYGDISSR.V                             | 2 | 2.97 | 0.41 | -2.93 |
| IPI00025818 | Isoform 1 of Polypeptide N-acetylgalactosaminyltransferase 1           | R.HYFSLGEIR.N                             | 2 | 2.38 | 0.24 | -2.43 |
| IPI00025818 | Isoform 1 of Polypeptide N-acetylgalactosaminyltransferase 1           | R.NVETNQCLDNM*AR.K                        | 2 | 4.62 | 0.53 | -3.39 |
| IPI00025818 | Isoform 1 of Polypeptide N-acetylgalactosaminyltransferase 1           | R.TPTM*AGGLFSIDR.D                        | 2 | 3.02 | 0.45 | -3.90 |
| IPI00025840 | Isoform 1 of Ephrin-A1 precursor                                       | K.ITHSPQAHDNPQEKR.L                       | 3 | 2.42 | 0.12 | -2.86 |
| IPI00025840 | Isoform 1 of Ephrin-A1 precursor                                       | R.FTPFTLGK.E                              | 1 | 1.87 | 0.29 | -2.25 |
| IPI00025840 | Isoform 1 of Ephrin-A1 precursor                                       | R.FTPFTLGK.E                              | 2 | 1.49 | 0.14 | -1.91 |
| IPI00025840 | Isoform 1 of Ephrin-A1 precursor                                       | R.FTPFTLGKEFK.E                           | 2 | 2.02 | 0.17 | -3.13 |
| IPI00025840 | Isoform 1 of Ephrin-A1 precursor                                       | R.LAADDPEVR.V                             | 2 | 3.18 | 0.16 | -2.95 |
| IPI00025846 | Isoform 2A of Desmocollin-2 precursor                                  | K.ECFTAANLIHSSDPDFQILEDGSVYTTNTILLSSEKR.S | 4 | 3.35 | 0.09 | -1.47 |
| IPI00025846 | Isoform 2A of Desmocollin-2 precursor                                  | K.IFVFLEHQTK.V                            | 3 | 2.09 | 0.31 | -2.47 |
| IPI00025846 | Isoform 2A of Desmocollin-2 precursor                                  | R.GPGVDQEPR.N                             | 2 | 2.74 | 0.31 | -2.66 |
| IPI00025846 | Isoform 2A of Desmocollin-2 precursor                                  | R.LSYQNDPPFGSYVVPITVR.D                   | 2 | 5.10 | 0.48 | -3.28 |
| IPI00025846 | Isoform 2A of Desmocollin-2 precursor                                  | R.SFTILLSNTENQEKK.K                       | 2 | 3.96 | 0.39 | -3.30 |
| IPI00025846 | Isoform 2A of Desmocollin-2 precursor                                  | R.SFTILLSNTENQEKKK.I                      | 3 | 1.88 | 0.14 | -1.92 |
| IPI00025864 | Cholinesterase precursor                                               | K.IFFPGVSEFGK.E                           | 2 | 3.03 | 0.23 | -3.89 |
| IPI00025864 | Cholinesterase precursor                                               | K.NIAAFGGNPK.S                            | 1 | 2.94 | 0.30 | -1.99 |
| IPI00025864 | Cholinesterase precursor                                               | K.NIAAFGGNPK.S                            | 2 | 3.07 | 0.38 | -1.47 |
| IPI00025864 | Cholinesterase precursor                                               | K.TQILVGVNKDEGTAFLVYGAPGFSK.D             | 3 | 2.47 | 0.21 | -1.67 |

|             |                                                 |                                              |   |      |      |       |
|-------------|-------------------------------------------------|----------------------------------------------|---|------|------|-------|
| IPI00025864 | Cholinesterase precursor                        | K.YLTLNTESTR.I                               | 1 | 2.33 | 0.18 | -3.53 |
| IPI00025864 | Cholinesterase precursor                        | K.YLTLNTESTR.I                               | 2 | 3.30 | 0.27 | -1.08 |
| IPI00025864 | Cholinesterase precursor                        | R.AILQSGSFNAPWAVTSLYEAR.N                    | 2 | 5.86 | 0.61 | -1.84 |
| IPI00025864 | Cholinesterase precursor                        | R.AILQSGSFNAPWAVTSLYEAR.N                    | 3 | 5.08 | 0.40 | -1.58 |
| IPI00025864 | Cholinesterase precursor                        | R.EALGDVVGDYNFICPALEFTK.K                    | 2 | 5.35 | 0.61 | -4.28 |
| IPI00025864 | Cholinesterase precursor                        | R.EALGDVVGDYNFICPALEFTKK.F                   | 2 | 3.87 | 0.54 | -4.08 |
| IPI00025869 | Alpha-galactosidase A precursor                 | R.SYTIAVASLGK.G                              | 2 | 3.43 | 0.42 | -2.05 |
| IPI00025992 | Hepcidin precursor                              | G.SVFPQQTGQLAELQPQDR.A                       | 2 | 4.31 | 0.44 | -2.89 |
| IPI00025992 | Hepcidin precursor                              | G.SVFPQQTGQLAELQPQDR.A                       | 3 | 4.94 | 0.30 | -3.09 |
| IPI00026031 | Uncharacterized protein C6orf72 precursor       | K.DVTEIDILVK.N                               | 2 | 2.51 | 0.29 | -3.32 |
| IPI00026031 | Uncharacterized protein C6orf72 precursor       | R.ISCQTLIVK.N                                | 2 | 2.40 | 0.13 | -2.26 |
| IPI00026050 | Ceroid-lipofuscinosis neuronal protein 5        | K.IM*HDAIGFR.S                               | 2 | 1.92 | 0.14 | -2.41 |
| IPI00026050 | Ceroid-lipofuscinosis neuronal protein 5        | K.ITYEEIPLPIR.N                              | 2 | 3.85 | 0.37 | -3.47 |
| IPI00026050 | Ceroid-lipofuscinosis neuronal protein 5        | K.LAEFGAEFK.N                                | 1 | 2.44 | 0.26 | -2.55 |
| IPI00026050 | Ceroid-lipofuscinosis neuronal protein 5        | K.LAEFGAEFK.N                                | 2 | 2.97 | 0.23 | -1.65 |
| IPI00026050 | Ceroid-lipofuscinosis neuronal protein 5        | K.YGDLLGHLK.I                                | 2 | 3.28 | 0.32 | -0.77 |
| IPI00026050 | Ceroid-lipofuscinosis neuronal protein 5        | R.LQAPVWEFK.Y                                | 2 | 2.84 | 0.29 | -2.94 |
| IPI00026103 | ACHE protein                                    | R.EALSDVVGDNHNVCPVAQLAGR.L                   | 3 | 3.36 | 0.14 | -2.18 |
| IPI00026103 | ACHE protein                                    | R.EAPGNVGLLDQR.L                             | 2 | 3.26 | 0.40 | -3.25 |
| IPI00026103 | ACHE protein                                    | R.FSFVPVVDGDFLSDTPEALINAGDFHGLQVLGVVK.D      | 3 | 3.94 | 0.42 | -2.87 |
| IPI00026103 | ACHE protein                                    | R.LKTPGGPVS AFLGIPFAEPPM*GPR.R               | 3 | 3.18 | 0.18 | -3.31 |
| IPI00026103 | ACHE protein                                    | R.VGAFGFLALPGSR.E                            | 2 | 3.42 | 0.36 | -2.96 |
| IPI00026103 | ACHE protein                                    | R.VGVQPQSDLAAEAVVLHYTDWLHPEDPAR.L            | 3 | 3.08 | 0.30 | -4.81 |
| IPI00026103 | ACHE protein                                    | R.VYAYVFEHR.A                                | 2 | 2.43 | 0.30 | -4.48 |
| IPI00026104 | Isoform Long of Iduronate 2-sulfatase precursor | K.ENGIVTM*SVGK.V                             | 2 | 3.32 | 0.39 | -3.94 |
| IPI00026104 | Isoform Long of Iduronate 2-sulfatase precursor | K.LFPYLDPFDSASQLM*EPGR.Q                     | 2 | 5.27 | 0.49 | -3.42 |
| IPI00026104 | Isoform Long of Iduronate 2-sulfatase precursor | K.LFPYLDPFDSASQLM*EPGR.Q                     | 3 | 4.59 | 0.35 | -7.20 |
| IPI00026104 | Isoform Long of Iduronate 2-sulfatase precursor | K.YSNFDVATHVPLIFYVPGR.T                      | 2 | 5.18 | 0.60 | -4.07 |
| IPI00026104 | Isoform Long of Iduronate 2-sulfatase precursor | K.YSNFDVATHVPLIFYVPGR.T                      | 3 | 4.24 | 0.29 | -7.05 |
| IPI00026104 | Isoform Long of Iduronate 2-sulfatase precursor | R.CPVPSFHVELCR.E                             | 3 | 3.05 | 0.33 | -1.34 |
| IPI00026104 | Isoform Long of Iduronate 2-sulfatase precursor | R.DLEEDPYLPGNPR.E                            | 2 | 3.66 | 0.38 | -4.22 |
| IPI00026104 | Isoform Long of Iduronate 2-sulfatase precursor | R.ELIAYSQYPR.P                               | 2 | 3.02 | 0.44 | -2.95 |
| IPI00026104 | Isoform Long of Iduronate 2-sulfatase precursor | R.FRDLEEDPYLPGNPR.E                          | 2 | 4.23 | 0.33 | -1.67 |
| IPI00026104 | Isoform Long of Iduronate 2-sulfatase precursor | R.FRDLEEDPYLPGNPR.E                          | 3 | 3.12 | 0.14 | -2.41 |
| IPI00026104 | Isoform Long of Iduronate 2-sulfatase precursor | R.GPDGELHANLLCPVDVLDVPEGTLPDKQSTEQAQIQLLEK.M | 3 | 6.41 | 0.56 | -4.02 |
| IPI00026104 | Isoform Long of Iduronate 2-sulfatase precursor | R.GPDGELHANLLCPVDVLDVPEGTLPDKQSTEQAQIQLLEK.M | 4 | 5.48 | 0.48 | -4.85 |
| IPI00026104 | Isoform Long of Iduronate 2-sulfatase precursor | R.QSM*DLVELVSLFPTLAGLAGLQVPPR.C              | 2 | 3.35 | 0.37 | -1.83 |
| IPI00026104 | Isoform Long of Iduronate 2-sulfatase precursor | R.QSM*DLVELVSLFPTLAGLAGLQVPPR.C              | 3 | 4.70 | 0.53 | -3.60 |
| IPI00026104 | Isoform Long of Iduronate 2-sulfatase precursor | R.SPNIDLASHSLLFQNAFAQQAV.C                   | 2 | 4.95 | 0.51 | -4.27 |
| IPI00026104 | Isoform Long of Iduronate 2-sulfatase precursor | R.SPNIDLASHSLLFQNAFAQQAV.C                   | 3 | 3.64 | 0.34 | -3.56 |
| IPI00026104 | Isoform Long of Iduronate 2-sulfatase precursor | R.TASLPEAGEK.L                               | 1 | 1.43 | 0.12 | -4.50 |
| IPI00026104 | Isoform Long of Iduronate 2-sulfatase precursor | R.TASLPEAGEKLFYLDPFDSASQLM*EPGR.Q            | 3 | 6.26 | 0.52 | -5.54 |

|             |                                                 |                                            |   |      |      |       |
|-------------|-------------------------------------------------|--------------------------------------------|---|------|------|-------|
| IPI00026104 | Isoform Long of Iduronate 2-sulfatase precursor | R.TASLPEAGEKLFYLDPFDSASQLM*EPGR.Q          | 4 | 4.47 | 0.16 | -2.88 |
| IPI00026125 | Deoxyribonuclease I-like 1 precursor            | R.EPFVAQFSLPSNLVPLVPLHTTPK.A               | 3 | 4.08 | 0.38 | -3.13 |
| IPI00026154 | Glucosidase 2 subunit beta precursor            | E.EAPPLSPQPASPAAEDKM*PPYDEQQTQAFIDAAQEAR.N | 4 | 5.01 | 0.39 | -3.67 |
| IPI00026154 | Glucosidase 2 subunit beta precursor            | K.ETM*VTSTTEPSR.C                          | 2 | 3.52 | 0.38 | -3.41 |
| IPI00026154 | Glucosidase 2 subunit beta precursor            | K.KLIELQAGKK.S                             | 2 | 2.43 | 0.10 | -4.06 |
| IPI00026154 | Glucosidase 2 subunit beta precursor            | K.LIELQAGKK.S                              | 1 | 2.20 | 0.06 | -4.09 |
| IPI00026154 | Glucosidase 2 subunit beta precursor            | K.LIELQAGKK.S                              | 2 | 2.10 | 0.10 | -1.93 |
| IPI00026154 | Glucosidase 2 subunit beta precursor            | K.SLEDQVEM*LR.T                            | 2 | 3.94 | 0.27 | -3.33 |
| IPI00026154 | Glucosidase 2 subunit beta precursor            | K.YEQGTGCWQGPNR.S                          | 2 | 3.44 | 0.42 | -2.67 |
| IPI00026154 | Glucosidase 2 subunit beta precursor            | R.ESLQQM*AEVTR.E                           | 2 | 2.76 | 0.21 | -5.18 |
| IPI00026154 | Glucosidase 2 subunit beta precursor            | R.NKFEEAER.S                               | 1 | 2.66 | 0.14 | -1.40 |
| IPI00026154 | Glucosidase 2 subunit beta precursor            | R.SLKDM*EESIR.N                            | 2 | 2.87 | 0.28 | -2.89 |
| IPI00026154 | Glucosidase 2 subunit beta precursor            | R.TVKEEAEKPER.E                            | 2 | 3.48 | 0.09 | -3.75 |
| IPI00026154 | Glucosidase 2 subunit beta precursor            | R.TVKEEAEKPER.E                            | 3 | 3.08 | 0.09 | -3.26 |
| IPI00026154 | Glucosidase 2 subunit beta precursor            | R.TVKEEAEKPEREAK.E                         | 3 | 2.31 | 0.11 | -3.79 |
| IPI00026174 | Cholecystokinins precursor                      | A.LTQPVPADPAGSGLQR.A                       | 2 | 3.25 | 0.45 | -1.81 |
| IPI00026174 | Cholecystokinins precursor                      | G.ALTTQPVPADPAGSGLQR.A                     | 2 | 4.34 | 0.39 | -4.00 |
| IPI00026174 | Cholecystokinins precursor                      | L.TQPVPADPAGSGLQR.A                        | 2 | 2.95 | 0.37 | -4.03 |
| IPI00026174 | Cholecystokinins precursor                      | R.AHLGALLAR.Y                              | 1 | 1.90 | 0.19 | -4.44 |
| IPI00026174 | Cholecystokinins precursor                      | R.AHLGALLAR.Y                              | 2 | 2.36 | 0.22 | -4.14 |
| IPI00026197 | Similar to Ig kappa chain V-IV region precursor | G.DIVM*TQSPDSLAVSLGER.A                    | 2 | 5.76 | 0.42 |       |
| IPI00026197 | Similar to Ig kappa chain V-IV region precursor | K.LLIYWASTR.E                              | 2 | 2.79 | 0.24 |       |
| IPI00026197 | Similar to Ig kappa chain V-IV region precursor | K.NYLAWYQQKPGQPPK.L                        | 3 | 2.60 | 0.33 |       |
| IPI00026197 | Similar to Ig kappa chain V-IV region precursor | Y.GDIVM*TQSPDSLAVSLGER.A                   | 2 | 5.69 | 0.50 |       |
| IPI00026199 | Glutathione peroxidase 3 precursor              | K.FLVGPDGIPIM*R.W                          | 2 | 3.45 | 0.32 | -5.02 |
| IPI00026199 | Glutathione peroxidase 3 precursor              | K.M*DILSYM*R.R                             | 2 | 3.34 | 0.20 | -1.63 |
| IPI00026199 | Glutathione peroxidase 3 precursor              | K.NSCPPTSELLGTSDR.L                        | 2 | 3.01 | 0.40 | -6.52 |
| IPI00026199 | Glutathione peroxidase 3 precursor              | K.QEPGENSEILPTLK.Y                         | 2 | 2.34 | 0.13 | -3.72 |
| IPI00026199 | Glutathione peroxidase 3 precursor              | K.YVRPGGGFVPNFQLFEK.G                      | 2 | 4.70 | 0.42 | -5.67 |
| IPI00026199 | Glutathione peroxidase 3 precursor              | K.YVRPGGGFVPNFQLFEK.G                      | 3 | 3.78 | 0.41 | -3.42 |
| IPI00026199 | Glutathione peroxidase 3 precursor              | K.YVRPGGGFVPNFQLFEKGDVNGEK.E               | 3 | 4.97 | 0.38 | -3.62 |
| IPI00026199 | Glutathione peroxidase 3 precursor              | K.YVRPGGGFVPNFQLFEKGDVNGEKEQK.F            | 3 | 6.06 | 0.36 | -4.28 |
| IPI00026199 | Glutathione peroxidase 3 precursor              | K.YVRPGGGFVPNFQLFEKGDVNGEKEQK.F            | 4 | 4.82 | 0.45 | -3.73 |
| IPI00026199 | Glutathione peroxidase 3 precursor              | K.YVRPGGGFVPNFQLFEKGDVNGEKEQK.F            | 5 | 1.69 | 0.16 | 1.80  |
| IPI00026199 | Glutathione peroxidase 3 precursor              | R.LFWEPM*K.V                               | 2 | 2.16 | 0.07 | -1.39 |
| IPI00026199 | Glutathione peroxidase 3 precursor              | R.PGGGFVPNFQLFEK.G                         | 2 | 4.01 | 0.39 | -3.23 |
| IPI00026199 | Glutathione peroxidase 3 precursor              | V.PNFQLFEK.G                               | 2 | 3.12 | 0.20 | -2.12 |
| IPI00026199 | Glutathione peroxidase 3 precursor              | Y.VRPGGGFVPNFQLFEKGDVNGEKEQK.F             | 3 | 5.03 | 0.21 | -1.68 |
| IPI00026216 | Puromycin-sensitive aminopeptidase              | K.AFFESHAPSAER.T                           | 2 | 2.76 | 0.19 | -5.26 |
| IPI00026216 | Puromycin-sensitive aminopeptidase              | K.AFFESHAPSAER.T                           | 3 | 2.32 | 0.21 | -2.00 |
| IPI00026216 | Puromycin-sensitive aminopeptidase              | K.FALEVAAK.T                               | 2 | 2.03 | 0.06 | -3.15 |
| IPI00026216 | Puromycin-sensitive aminopeptidase              | K.ILM*DKPEM*NVVLK.N                        | 2 | 2.84 | 0.12 | -0.51 |

|             |                                                                 |                                        |   |      |      |       |
|-------------|-----------------------------------------------------------------|----------------------------------------|---|------|------|-------|
| IPI00026216 | Puromycin-sensitive aminopeptidase                              | K.LNLGTVGFYR.T                         | 2 | 3.54 | 0.26 | -2.53 |
| IPI00026216 | Puromycin-sensitive aminopeptidase                              | K.QILSADLR.S                           | 2 | 1.65 | 0.05 | -2.33 |
| IPI00026216 | Puromycin-sensitive aminopeptidase                              | K.VLTFALSEEVRPQDTVSVIGGVAGGSK.H        | 3 | 4.43 | 0.34 | -2.69 |
| IPI00026216 | Puromycin-sensitive aminopeptidase                              | R.AQELDALDNSHPIEVSVGHPSEVDEIFDAISYSK.G | 3 | 7.18 | 0.63 | -4.80 |
| IPI00026216 | Puromycin-sensitive aminopeptidase                              | R.AQELDALDNSHPIEVSVGHPSEVDEIFDAISYSK.G | 4 | 3.87 | 0.35 | -2.04 |
| IPI00026216 | Puromycin-sensitive aminopeptidase                              | R.DAESIHQYLLQR.K                       | 2 | 2.84 | 0.28 | -1.78 |
| IPI00026216 | Puromycin-sensitive aminopeptidase                              | R.LGLQNDLFSLAR.A                       | 2 | 3.81 | 0.35 | -3.62 |
| IPI00026216 | Puromycin-sensitive aminopeptidase                              | R.SKYTTPSGEVR.Y                        | 2 | 2.95 | 0.40 | -3.21 |
| IPI00026216 | Puromycin-sensitive aminopeptidase                              | R.VALSNM*NVIDR.K                       | 2 | 2.83 | 0.30 | -3.26 |
| IPI00026216 | Puromycin-sensitive aminopeptidase                              | R.VLGATLLPDLIQK.V                      | 2 | 4.47 | 0.42 | -3.27 |
| IPI00026216 | Puromycin-sensitive aminopeptidase                              | R.YAAVTQFEATDAR.R                      | 2 | 4.86 | 0.42 | -5.28 |
| IPI00026230 | Heterogeneous nuclear ribonucleoprotein H2                      | R.YVEVFKSNSVEMDWVLK.H                  | 3 | 2.20 | 0.17 |       |
| IPI00026237 | Myelin-associated glycoprotein precursor                        | K.SLELPFQGAHR.L                        | 2 | 2.67 | 0.22 | -2.92 |
| IPI00026237 | Myelin-associated glycoprotein precursor                        | R.DTVQCLCVVK.S                         | 2 | 3.58 | 0.37 | -2.33 |
| IPI00026237 | Myelin-associated glycoprotein precursor                        | R.FDFPDELRPVAVHGVVWFNSPYPK.N           | 3 | 2.95 | 0.13 | -3.97 |
| IPI00026237 | Myelin-associated glycoprotein precursor                        | R.FDFPDELRPVAVHGVVWFNSPYPK.N           | 4 | 2.64 | 0.12 | -2.91 |
| IPI00026237 | Myelin-associated glycoprotein precursor                        | R.LLGLDLGLR.N                          | 2 | 2.97 | 0.12 | -4.21 |
| IPI00026237 | Myelin-associated glycoprotein precursor                        | R.SGLVLTSLTLR.G                        | 2 | 3.39 | 0.26 | -3.33 |
| IPI00026240 | ADP-ribosyl cyclase 2 precursor                                 | K.DM*GFQYSCINDYRPVK.L                  | 3 | 2.65 | 0.17 | -1.70 |
| IPI00026240 | ADP-ribosyl cyclase 2 precursor                                 | K.GFFADYEIPNLQK.E                      | 2 | 4.36 | 0.42 | -3.26 |
| IPI00026240 | ADP-ribosyl cyclase 2 precursor                                 | R.FM*PLSDVLYGR.V                       | 2 | 3.16 | 0.41 | -3.58 |
| IPI00026241 | Bone marrow stromal antigen 2 precursor                         | K.LQDASAEVER.L                         | 2 | 3.36 | 0.22 | -2.70 |
| IPI00026259 | N                                                               | K.TGHIAAGTSTNGIK.F                     | 2 | 3.49 | 0.40 | -2.49 |
| IPI00026259 | N                                                               | R.FLPSYQAVEYM*R.R                      | 2 | 3.28 | 0.38 | -2.57 |
| IPI00026259 | N                                                               | R.VGDSPIPGAGAYADDTAGAAAATGNGDILM*R.F   | 3 | 4.42 | 0.46 | -3.88 |
| IPI00026262 | Isoform 1 of Ras GTPase-activating protein 1                    | R.ATTLASTLM*EQYMK.A                    | 3 | 1.98 | 0.14 | -6.13 |
| IPI00026270 | Carboxypeptidase M precursor                                    | K.ASLIEYIK.Q                           | 2 | 2.64 | 0.18 | -1.75 |
| IPI00026270 | Carboxypeptidase M precursor                                    | K.GQVFDQNGNPLPNVIVEVQDR.K              | 3 | 5.88 | 0.44 | -4.67 |
| IPI00026270 | Carboxypeptidase M precursor                                    | K.GQVFDQNGNPLPNVIVEVQDR.H              | 3 | 4.01 | 0.34 | -1.63 |
| IPI00026270 | Carboxypeptidase M precursor                                    | K.YVANM*HGDETVGR.E                     | 2 | 3.73 | 0.38 | -3.54 |
| IPI00026270 | Carboxypeptidase M precursor                                    | R.ENYNQYDLNR.N                         | 2 | 3.11 | 0.34 | -2.70 |
| IPI00026270 | Carboxypeptidase M precursor                                    | R.NLWVLVGR.F                           | 2 | 2.68 | 0.15 | -1.49 |
| IPI00026270 | Carboxypeptidase M precursor                                    | R.SLTPDDVDFQYLAHTYASR.N                | 2 | 3.64 | 0.27 | -2.53 |
| IPI00026285 | Sia-alpha-2,3-Gal-beta-1,4-GlcNAc-R:alpha 2,8-sialyltransferase | K.YVFSISNFR.S                          | 2 | 2.91 | 0.33 | -2.02 |
| IPI00026285 | Sia-alpha-2,3-Gal-beta-1,4-GlcNAc-R:alpha 2,8-sialyltransferase | K.YYNNLLTIQDR.N                        | 2 | 3.35 | 0.39 | -2.72 |
| IPI00026285 | Sia-alpha-2,3-Gal-beta-1,4-GlcNAc-R:alpha 2,8-sialyltransferase | R.CNFAPTEAFQR.D                        | 2 | 3.07 | 0.35 | -2.12 |
| IPI00026299 | Isoform Glycophorin C of Glycophorin-C                          | K.GTEFAESADAALQGDPALQDAGDSSR.K         | 3 | 3.44 | 0.41 | -3.14 |
| IPI00026314 | Isoform 1 of Gelsolin precursor                                 | D.PDQTDGLGLSYLSSHIANVER.V              | 3 | 4.86 | 0.52 | -3.42 |
| IPI00026314 | Isoform 1 of Gelsolin precursor                                 | E.PEAM*LQVLGPKPALPAGTEDTAKEDAANRK.L    | 3 | 3.89 | 0.36 | -5.07 |

|             |                                 |                                             |   |      |      |       |
|-------------|---------------------------------|---------------------------------------------|---|------|------|-------|
| IPI00026314 | Isoform 1 of Gelsolin precursor | E.VQGFESATFLGYFK.S                          | 2 | 3.97 | 0.46 | -3.75 |
| IPI00026314 | Isoform 1 of Gelsolin precursor | K.AALKTASDFITK.M                            | 2 | 3.47 | 0.36 | -3.46 |
| IPI00026314 | Isoform 1 of Gelsolin precursor | K.AALKTASDFITK.M                            | 3 | 4.03 | 0.47 | -3.31 |
| IPI00026314 | Isoform 1 of Gelsolin precursor | K.AGALNSNDAFVLK.T                           | 1 | 2.57 | 0.21 | -2.97 |
| IPI00026314 | Isoform 1 of Gelsolin precursor | K.AGALNSNDAFVLK.T                           | 2 | 4.49 | 0.42 | -5.57 |
| IPI00026314 | Isoform 1 of Gelsolin precursor | K.AGALNSNDAFVLKTPSAAYLWVGTGASEAEK.T         | 3 | 6.75 | 0.53 | -3.84 |
| IPI00026314 | Isoform 1 of Gelsolin precursor | K.AGALNSNDAFVLKTPSAAYLWVGTGASEAEK.T         | 4 | 3.79 | 0.17 | -3.51 |
| IPI00026314 | Isoform 1 of Gelsolin precursor | K.AGALNSNDAFVLKTPSAAYLWVGTGASEAEKTGAQELLR.V | 3 | 6.34 | 0.51 | -0.84 |
| IPI00026314 | Isoform 1 of Gelsolin precursor | K.AGALNSNDAFVLKTPSAAYLWVGTGASEAEKTGAQELLR.V | 4 | 6.95 | 0.56 | -4.80 |
| IPI00026314 | Isoform 1 of Gelsolin precursor | K.AGKEPGLQIWR.V                             | 2 | 2.53 | 0.22 | -1.08 |
| IPI00026314 | Isoform 1 of Gelsolin precursor | K.AGKEPGLQIWR.V                             | 3 | 3.94 | 0.25 | -3.55 |
| IPI00026314 | Isoform 1 of Gelsolin precursor | K.DSQEEEEKTEALTSAK.R                        | 2 | 4.75 | 0.45 | -2.75 |
| IPI00026314 | Isoform 1 of Gelsolin precursor | K.DSQEEEEKTEALTSAK.R                        | 3 | 5.95 | 0.39 | -2.84 |
| IPI00026314 | Isoform 1 of Gelsolin precursor | K.DSQEEEEKTEALTSAKR.Y                       | 2 | 4.87 | 0.44 | -3.45 |
| IPI00026314 | Isoform 1 of Gelsolin precursor | K.DSQEEEEKTEALTSAKR.Y                       | 3 | 4.76 | 0.31 | -3.10 |
| IPI00026314 | Isoform 1 of Gelsolin precursor | K.DSQEEEEKTEALTSAKR.Y                       | 4 | 2.79 | 0.15 | -3.55 |
| IPI00026314 | Isoform 1 of Gelsolin precursor | K.EPAHLM*SLFGGKPM*IIYK.G                    | 2 | 2.50 | 0.28 | -3.57 |
| IPI00026314 | Isoform 1 of Gelsolin precursor | K.EPGLQIWR.V                                | 1 | 1.64 | 0.13 | -2.45 |
| IPI00026314 | Isoform 1 of Gelsolin precursor | K.EPGLQIWR.V                                | 2 | 1.79 | 0.09 | -1.40 |
| IPI00026314 | Isoform 1 of Gelsolin precursor | K.FDLVPVPTNLYGDFFTGDAYVILK.T                | 2 | 5.15 | 0.57 | -6.20 |
| IPI00026314 | Isoform 1 of Gelsolin precursor | K.FDLVPVPTNLYGDFFTGDAYVILK.T                | 3 | 5.38 | 0.57 | -5.06 |
| IPI00026314 | Isoform 1 of Gelsolin precursor | K.GGVASGFKHVVPNEVVVQR.L                     | 2 | 4.50 | 0.46 | -4.71 |
| IPI00026314 | Isoform 1 of Gelsolin precursor | K.GGVASGFKHVVPNEVVVQR.L                     | 3 | 3.57 | 0.34 | -2.95 |
| IPI00026314 | Isoform 1 of Gelsolin precursor | K.HVVPNEVVVQR.L                             | 1 | 2.72 | 0.26 | -3.48 |
| IPI00026314 | Isoform 1 of Gelsolin precursor | K.HVVPNEVVVQR.L                             | 2 | 2.91 | 0.34 | -3.14 |
| IPI00026314 | Isoform 1 of Gelsolin precursor | K.HVVPNEVVVQR.L                             | 3 | 3.84 | 0.13 | -4.79 |
| IPI00026314 | Isoform 1 of Gelsolin precursor | K.KGGVASGFKHVVPNEVVVQR.L                    | 3 | 3.76 | 0.34 | -3.72 |
| IPI00026314 | Isoform 1 of Gelsolin precursor | K.M*DYPKQTQVSVLPEGGETPLFK.Q                 | 3 | 4.01 | 0.28 | -3.69 |
| IPI00026314 | Isoform 1 of Gelsolin precursor | K.NWRDPDQTDGLGLS.Y                          | 2 | 3.25 | 0.39 | -3.90 |
| IPI00026314 | Isoform 1 of Gelsolin precursor | K.NWRDPDQTDGLGLSYLSSH.I                     | 3 | 4.64 | 0.55 | -2.91 |
| IPI00026314 | Isoform 1 of Gelsolin precursor | K.NWRDPDQTDGLGLSYLSSHIANVER.V               | 2 | 3.75 | 0.48 | -4.53 |
| IPI00026314 | Isoform 1 of Gelsolin precursor | K.NWRDPDQTDGLGLSYLSSHIANVER.V               | 3 | 6.89 | 0.61 | -0.08 |
| IPI00026314 | Isoform 1 of Gelsolin precursor | K.NWRDPDQTDGLGLSYLSSHIANVER.V               | 4 | 5.23 | 0.53 | -3.97 |
| IPI00026314 | Isoform 1 of Gelsolin precursor | K.QGFEPSPFVGWFLGWDDDYWSVDPLDR.A             | 2 | 2.65 | 0.53 | -2.17 |
| IPI00026314 | Isoform 1 of Gelsolin precursor | K.QGFEPSPFVGWFLGWDDDYWSVDPLDR.A             | 3 | 4.07 | 0.41 | -5.95 |
| IPI00026314 | Isoform 1 of Gelsolin precursor | K.QTQVSVLPEGGETPLFK.Q                       | 2 | 4.46 | 0.47 | -4.36 |
| IPI00026314 | Isoform 1 of Gelsolin precursor | K.QTQVSVLPEGGETPLFK.Q                       | 3 | 4.08 | 0.38 | -2.49 |
| IPI00026314 | Isoform 1 of Gelsolin precursor | K.RYIETDPANR.D                              | 2 | 2.13 | 0.13 | -3.27 |
| IPI00026314 | Isoform 1 of Gelsolin precursor | K.RYIETDPANRDR.R                            | 2 | 1.94 | 0.15 | -3.83 |
| IPI00026314 | Isoform 1 of Gelsolin precursor | K.SEDCFILDHGK.D                             | 2 | 3.23 | 0.36 |       |
| IPI00026314 | Isoform 1 of Gelsolin precursor | K.SEDCFILDHGK.D                             | 3 | 1.90 | 0.22 | -1.15 |
| IPI00026314 | Isoform 1 of Gelsolin precursor | K.SEDCFILDHGKDGK.I                          | 2 | 3.59 | 0.41 | -3.81 |

|             |                                 |                                               |   |      |      |       |
|-------------|---------------------------------|-----------------------------------------------|---|------|------|-------|
| IPI00026314 | Isoform 1 of Gelsolin precursor | K.SEDCFILDHGKDGK.I                            | 3 | 2.48 | 0.23 | -2.04 |
| IPI00026314 | Isoform 1 of Gelsolin precursor | K.TASDFITK.M                                  | 1 | 2.33 | 0.13 | -3.24 |
| IPI00026314 | Isoform 1 of Gelsolin precursor | K.TASDFITK.M                                  | 2 | 3.01 | 0.39 | -4.23 |
| IPI00026314 | Isoform 1 of Gelsolin precursor | K.TASDFITKM*DYPK.Q                            | 2 | 3.04 | 0.09 |       |
| IPI00026314 | Isoform 1 of Gelsolin precursor | K.TEALTSKR.Y                                  | 2 | 2.80 | 0.24 | -1.36 |
| IPI00026314 | Isoform 1 of Gelsolin precursor | K.TGAQELLR.V                                  | 1 | 1.94 | 0.07 | -2.17 |
| IPI00026314 | Isoform 1 of Gelsolin precursor | K.TGAQELLR.V                                  | 2 | 3.29 | 0.18 | -2.62 |
| IPI00026314 | Isoform 1 of Gelsolin precursor | K.TPSAAYLWVGTGASEAEK.T                        | 2 | 6.47 | 0.54 | -7.39 |
| IPI00026314 | Isoform 1 of Gelsolin precursor | K.TPSAAYLWVGTGASEAEK.T                        | 3 | 3.99 | 0.36 | -3.40 |
| IPI00026314 | Isoform 1 of Gelsolin precursor | K.TPSAAYLWVGTGASEAEKTGAQELLR.V                | 2 | 5.13 | 0.49 | -1.46 |
| IPI00026314 | Isoform 1 of Gelsolin precursor | K.TPSAAYLWVGTGASEAEKTGAQELLR.V                | 3 | 6.36 | 0.61 | -4.13 |
| IPI00026314 | Isoform 1 of Gelsolin precursor | K.TPSAAYLWVGTGASEAEKTGAQELLR.V                | 4 | 4.17 | 0.43 | -3.10 |
| IPI00026314 | Isoform 1 of Gelsolin precursor | K.VPVPATYGGFYGGDSYIILYNYR.H                   | 2 | 4.93 | 0.57 | -3.85 |
| IPI00026314 | Isoform 1 of Gelsolin precursor | K.VPVPATYGGFYGGDSYIILYNYR.H                   | 3 | 5.26 | 0.50 | -5.15 |
| IPI00026314 | Isoform 1 of Gelsolin precursor | K.VSNGAGTM*SVSLVADENPFAQGALK.S                | 2 | 5.39 | 0.53 | -4.15 |
| IPI00026314 | Isoform 1 of Gelsolin precursor | K.VSNGAGTM*SVSLVADENPFAQGALK.S                | 3 | 6.19 | 0.42 | -5.56 |
| IPI00026314 | Isoform 1 of Gelsolin precursor | K.VSNGAGTM*SVSLVADENPFAQGALKSEDCFILDHGK.D     | 3 | 2.97 | 0.14 | -2.06 |
| IPI00026314 | Isoform 1 of Gelsolin precursor | K.VSNGAGTM*SVSLVADENPFAQGALKSEDCFILDHGK.D     | 4 | 5.34 | 0.46 | -2.67 |
| IPI00026314 | Isoform 1 of Gelsolin precursor | K.VSNGAGTM*SVSLVADENPFAQGALKSEDCFILDHGKDGK.I  | 4 | 3.41 | 0.17 | -1.20 |
| IPI00026314 | Isoform 1 of Gelsolin precursor | L.GLSYLSSHIANVER.V                            | 2 | 3.70 | 0.41 | -1.87 |
| IPI00026314 | Isoform 1 of Gelsolin precursor | Q.GAQTQDEVAASAILTAQLDEELGGTPVQSR.V            | 3 | 5.59 | 0.52 | -4.02 |
| IPI00026314 | Isoform 1 of Gelsolin precursor | Q.VLGPKPALPAGTEDTAKEDAANR.K                   | 3 | 4.43 | 0.43 | -1.00 |
| IPI00026314 | Isoform 1 of Gelsolin precursor | R.AM*AELAA.-                                  | 1 | 1.63 | 0.08 | -2.59 |
| IPI00026314 | Isoform 1 of Gelsolin precursor | R.AQPVQVAEGS.E                                | 1 | 2.17 | 0.22 | -1.54 |
| IPI00026314 | Isoform 1 of Gelsolin precursor | R.AQPVQVAEGSEPDGFWEALGGK.A                    | 2 | 7.39 | 0.61 | -4.26 |
| IPI00026314 | Isoform 1 of Gelsolin precursor | R.AQPVQVAEGSEPDGFWEALGGK.A                    | 3 | 5.93 | 0.50 | -4.09 |
| IPI00026314 | Isoform 1 of Gelsolin precursor | R.AQPVQVAEGSEPDGFWEALGGKAAAYR.T               | 3 | 3.20 | 0.42 | -3.63 |
| IPI00026314 | Isoform 1 of Gelsolin precursor | R.ARVHVSEEGTEPEAM*LQVLGPKPALPAGTEDTAKEDAANR.K | 4 | 6.02 | 0.56 | 0.06  |
| IPI00026314 | Isoform 1 of Gelsolin precursor | R.ARVHVSEEGTEPEAM*LQVLGPKPALPAGTEDTAKEDAANR.K | 5 | 3.51 | 0.37 | -1.37 |
| IPI00026314 | Isoform 1 of Gelsolin precursor | R.ARVHVSEEGTEPEAM*LQVLGPKPALPAGTEDTAKEDAANR.L | 4 | 5.37 | 0.46 | -3.15 |
| IPI00026314 | Isoform 1 of Gelsolin precursor | R.ARVHVSEEGTEPEAM*LQVLGPKPALPAGTEDTAKEDAANR.L | 5 | 2.56 | 0.21 | -3.55 |
| IPI00026314 | Isoform 1 of Gelsolin precursor | R.ARVHVSEEGTEPEAM*LQVLGPKPALPAGTEDTAKEDAANR.L | 6 | 3.26 | 0.35 | -3.09 |
| IPI00026314 | Isoform 1 of Gelsolin precursor | R.ATEVPVSWESFNNGDCFILDGNNIHQWCGSNSNR.Y        | 3 | 4.89 | 0.55 | -4.91 |
| IPI00026314 | Isoform 1 of Gelsolin precursor | R.ATEVPVSWESFNNGDCFILDGNNIHQWCGSNSNR.Y        | 4 | 5.60 | 0.49 | -2.98 |
| IPI00026314 | Isoform 1 of Gelsolin precursor | R.ATEVPVSWESFNNGDCFILDGNNIHQWCGSNSNRYER.L     | 4 | 4.03 | 0.32 | -2.87 |
| IPI00026314 | Isoform 1 of Gelsolin precursor | R.AVEVLPKAGALNSNDAFVLK.T                      | 2 | 4.28 | 0.57 | -2.30 |
| IPI00026314 | Isoform 1 of Gelsolin precursor | R.AVEVLPKAGALNSNDAFVLK.T                      | 3 | 3.88 | 0.46 | -2.45 |
| IPI00026314 | Isoform 1 of Gelsolin precursor | R.AVQHREVQGFESATFLGYFK.S                      | 2 | 4.87 | 0.53 | -4.46 |
| IPI00026314 | Isoform 1 of Gelsolin precursor | R.AVQHREVQGFESATFLGYFK.S                      | 3 | 4.96 | 0.55 | -3.36 |
| IPI00026314 | Isoform 1 of Gelsolin precursor | R.AVQHREVQGFESATFLGYFK.S                      | 4 | 2.83 | 0.20 | -2.54 |
| IPI00026314 | Isoform 1 of Gelsolin precursor | R.DPDQTDGLGLSYLSSH.I                          | 2 | 5.32 | 0.59 | -1.48 |
| IPI00026314 | Isoform 1 of Gelsolin precursor | R.DPDQTDGLGLSYLSSHIANVER.V                    | 2 | 4.98 | 0.55 | -5.04 |

|             |                                 |                                              |   |      |      |       |
|-------------|---------------------------------|----------------------------------------------|---|------|------|-------|
| IPI00026314 | Isoform 1 of Gelsolin precursor | R.DPDQTDGLGLSYLSSHIANVER.V                   | 3 | 4.47 | 0.54 | -3.92 |
| IPI00026314 | Isoform 1 of Gelsolin precursor | R.EGGQTAPASTR.L                              | 2 | 3.48 | 0.31 | -2.71 |
| IPI00026314 | Isoform 1 of Gelsolin precursor | R.EGGQTAPASTRLFQVRANSAGATR.A                 | 3 | 2.14 | 0.13 | -1.91 |
| IPI00026314 | Isoform 1 of Gelsolin precursor | R.EVQGFESATFLGYFK.S                          | 1 | 2.39 | 0.52 | -2.17 |
| IPI00026314 | Isoform 1 of Gelsolin precursor | R.EVQGFESATFLGYFK.S                          | 2 | 5.75 | 0.57 | -7.42 |
| IPI00026314 | Isoform 1 of Gelsolin precursor | R.EVQGFESATFLGYFK.S                          | 3 | 2.84 | 0.39 | -2.90 |
| IPI00026314 | Isoform 1 of Gelsolin precursor | R.IEGSNKVPVDPAT.Y                            | 2 | 3.03 | 0.31 | 2.10  |
| IPI00026314 | Isoform 1 of Gelsolin precursor | R.IEGSNKVPVDPATYGGF.Y                        | 2 | 3.34 | 0.42 | -3.47 |
| IPI00026314 | Isoform 1 of Gelsolin precursor | R.IEGSNKVPVDPATYGGFYGGDSYIIL.Y               | 2 | 3.49 | 0.45 | -2.36 |
| IPI00026314 | Isoform 1 of Gelsolin precursor | R.IEGSNKVPVDPATYGGFYGGDSYIIL.Y               | 3 | 3.58 | 0.39 | -3.23 |
| IPI00026314 | Isoform 1 of Gelsolin precursor | R.IEGSNKVPVDPATYGGFYGGDSYIILYNYR.H           | 2 | 3.06 | 0.51 | -3.37 |
| IPI00026314 | Isoform 1 of Gelsolin precursor | R.IEGSNKVPVDPATYGGFYGGDSYIILYNYR.H           | 3 | 6.13 | 0.60 | -7.65 |
| IPI00026314 | Isoform 1 of Gelsolin precursor | R.IEGSNKVPVDPATYGGFYGGDSYIILYNYR.H           | 4 | 4.15 | 0.31 | -3.43 |
| IPI00026314 | Isoform 1 of Gelsolin precursor | R.LFACSNK.I                                  | 1 | 2.02 | 0.09 | -2.52 |
| IPI00026314 | Isoform 1 of Gelsolin precursor | R.LFQVRANSAGATR.A                            | 2 | 3.10 | 0.18 | 0.01  |
| IPI00026314 | Isoform 1 of Gelsolin precursor | R.LFQVRANSAGATR.A                            | 3 | 2.15 | 0.29 | -2.34 |
| IPI00026314 | Isoform 1 of Gelsolin precursor | R.PNSM*VVEHPEFLK.A                           | 2 | 3.19 | 0.20 | -2.39 |
| IPI00026314 | Isoform 1 of Gelsolin precursor | R.QGQIYNWQGAQSTQDEVAASAILTAQLDEELGGTPVQSR.V  | 3 | 5.65 | 0.56 | -4.80 |
| IPI00026314 | Isoform 1 of Gelsolin precursor | R.QGQIYNWQGAQSTQDEVAASAILTAQLDEELGGTPVQSR.V  | 4 | 5.41 | 0.44 | -6.75 |
| IPI00026314 | Isoform 1 of Gelsolin precursor | R.TPITVVK.Q                                  | 1 | 1.94 | 0.11 | -2.51 |
| IPI00026314 | Isoform 1 of Gelsolin precursor | R.VEKFDLVPVPTNLYGDDFTGDAYVILK.T              | 2 | 4.43 | 0.54 | -4.60 |
| IPI00026314 | Isoform 1 of Gelsolin precursor | R.VEKFDLVPVPTNLYGDDFTGDAYVILK.T              | 3 | 5.44 | 0.51 | -6.49 |
| IPI00026314 | Isoform 1 of Gelsolin precursor | R.VEKFDLVPVPTNLYGDDFTGDAYVILK.T              | 4 | 3.77 | 0.22 | -4.08 |
| IPI00026314 | Isoform 1 of Gelsolin precursor | R.VHVSEEGTEPEAM*LQVLGPK.P                    | 2 | 5.43 | 0.55 | -2.72 |
| IPI00026314 | Isoform 1 of Gelsolin precursor | R.VHVSEEGTEPEAM*LQVLGPK.P                    | 3 | 3.83 | 0.49 | -3.16 |
| IPI00026314 | Isoform 1 of Gelsolin precursor | R.VHVSEEGTEPEAM*LQVLGPKPALPAGTEDTAK.E        | 3 | 5.67 | 0.50 | -0.19 |
| IPI00026314 | Isoform 1 of Gelsolin precursor | R.VHVSEEGTEPEAM*LQVLGPKPALPAGTEDTAK.E        | 4 | 4.34 | 0.47 | -4.95 |
| IPI00026314 | Isoform 1 of Gelsolin precursor | R.VHVSEEGTEPEAM*LQVLGPKPALPAGTEDTAKEDAANR.K  | 3 | 5.20 | 0.58 | -3.51 |
| IPI00026314 | Isoform 1 of Gelsolin precursor | R.VHVSEEGTEPEAM*LQVLGPKPALPAGTEDTAKEDAANR.K  | 4 | 6.02 | 0.53 | -3.73 |
| IPI00026314 | Isoform 1 of Gelsolin precursor | R.VHVSEEGTEPEAM*LQVLGPKPALPAGTEDTAKEDAANR.K  | 5 | 2.48 | 0.40 | -3.26 |
| IPI00026314 | Isoform 1 of Gelsolin precursor | R.VHVSEEGTEPEAM*LQVLGPKPALPAGTEDTAKEDAANRK.L | 3 | 5.54 | 0.55 | -5.03 |
| IPI00026314 | Isoform 1 of Gelsolin precursor | R.VHVSEEGTEPEAM*LQVLGPKPALPAGTEDTAKEDAANRK.L | 4 | 5.90 | 0.51 | -4.75 |
| IPI00026314 | Isoform 1 of Gelsolin precursor | R.VHVSEEGTEPEAM*LQVLGPKPALPAGTEDTAKEDAANRK.L | 5 | 2.57 | 0.32 | -3.40 |
| IPI00026314 | Isoform 1 of Gelsolin precursor | R.VPEARNSM*VVEHPEFLK.A                       | 2 | 2.73 | 0.27 | -4.38 |
| IPI00026314 | Isoform 1 of Gelsolin precursor | R.VPEARNSM*VVEHPEFLK.A                       | 3 | 4.96 | 0.37 | -3.98 |
| IPI00026314 | Isoform 1 of Gelsolin precursor | R.VPEARNSM*VVEHPEFLK.A                       | 4 | 2.19 | 0.27 | -3.42 |
| IPI00026314 | Isoform 1 of Gelsolin precursor | R.VPFDAATLHTSTAM*.A                          | 2 | 3.96 | 0.29 | -7.65 |
| IPI00026314 | Isoform 1 of Gelsolin precursor | R.VPFDAATLHTSTAM*AAQHGM*DDDGTGQK.Q           | 2 | 4.55 | 0.56 | -1.26 |
| IPI00026314 | Isoform 1 of Gelsolin precursor | R.VPFDAATLHTSTAM*AAQHGM*DDDGTGQK.Q           | 3 | 6.06 | 0.60 | -3.47 |
| IPI00026314 | Isoform 1 of Gelsolin precursor | R.VPFDAATLHTSTAM*AAQHGM*DDDGTGQK.Q           | 4 | 4.32 | 0.48 | -2.78 |
| IPI00026314 | Isoform 1 of Gelsolin precursor | R.VPFDAATLHTSTAM*AAQHGM*DDDGTGQKQIWR.I       | 4 | 4.15 | 0.41 | -2.59 |
| IPI00026314 | Isoform 1 of Gelsolin precursor | R.VVQGKEPAHLM*SLFGGK.P                       | 2 | 3.16 | 0.44 | -3.59 |

|             |                                                                            |                                        |   |      |      |       |
|-------------|----------------------------------------------------------------------------|----------------------------------------|---|------|------|-------|
| IPI00026314 | Isoform 1 of Gelsolin precursor                                            | R.VVQGKEPAHLM*SLFGGKPM*IYK.G           | 3 | 3.94 | 0.42 | -2.67 |
| IPI00026314 | Isoform 1 of Gelsolin precursor                                            | R.YIETDPANR.D                          | 1 | 2.14 | 0.26 | -3.85 |
| IPI00026314 | Isoform 1 of Gelsolin precursor                                            | R.YIETDPANR.D                          | 2 | 3.04 | 0.32 | -2.90 |
| IPI00026314 | Isoform 1 of Gelsolin precursor                                            | R.YIETDPANRDR.R                        | 2 | 1.93 | 0.16 | -2.57 |
| IPI00026314 | Isoform 1 of Gelsolin precursor                                            | R.YIETDPANRDR.R                        | 3 | 1.77 | 0.21 | -2.74 |
| IPI00026314 | Isoform 1 of Gelsolin precursor                                            | R.YIETDPANRDRR.T                       | 3 | 2.23 | 0.14 | -0.69 |
| IPI00026314 | Isoform 1 of Gelsolin precursor                                            | V.GTGASEAEKGAQELLR.V                   | 3 | 4.03 | 0.29 | -1.18 |
| IPI00026314 | Isoform 1 of Gelsolin precursor                                            | V.PEARPNSM*VVEHPEFLK.A                 | 3 | 4.19 | 0.26 | -3.03 |
| IPI00026314 | Isoform 1 of Gelsolin precursor                                            | V.PFDAATLHTSTAM*AAQHGM*DDDGTGQK.Q      | 3 | 4.59 | 0.51 | -0.45 |
| IPI00026314 | Isoform 1 of Gelsolin precursor                                            | V.PNEVVVQR.L                           | 2 | 3.16 | 0.18 | 0.81  |
| IPI00026314 | Isoform 1 of Gelsolin precursor                                            | V.PVPTNLYGDFFTGDAYVILK.T               | 2 | 2.95 | 0.38 | -1.68 |
| IPI00026314 | Isoform 1 of Gelsolin precursor                                            | V.VPNEVVVQR.L                          | 1 | 2.56 | 0.23 | -1.41 |
| IPI00026314 | Isoform 1 of Gelsolin precursor                                            | W.QGAQSTQDEVAASAILTAQLDEELGGTPVQSR.V   | 2 | 4.11 | 0.47 | -1.00 |
| IPI00026314 | Isoform 1 of Gelsolin precursor                                            | W.QGAQSTQDEVAASAILTAQLDEELGGTPVQSR.V   | 3 | 5.41 | 0.53 | -7.89 |
| IPI00026314 | Isoform 1 of Gelsolin precursor                                            | W.RDPDQTDGLGLSYLSSHIANVER.V            | 2 | 3.96 | 0.43 | -4.51 |
| IPI00026314 | Isoform 1 of Gelsolin precursor                                            | W.RDPDQTDGLGLSYLSSHIANVER.V            | 3 | 6.56 | 0.54 | -7.32 |
| IPI00026314 | Isoform 1 of Gelsolin precursor                                            | W.RDPDQTDGLGLSYLSSHIANVER.V            | 4 | 4.64 | 0.49 | -3.36 |
| IPI00026314 | Isoform 1 of Gelsolin precursor                                            | Y.LSSHIANVER.V                         | 1 | 2.71 | 0.26 | -4.21 |
| IPI00026314 | Isoform 1 of Gelsolin precursor                                            | Y.LSSHIANVER.V                         | 2 | 3.23 | 0.18 | -1.94 |
| IPI00026358 | Gamma-aminobutyric acid receptor-associated protein-like 2                 | K.AIFLFDVK.T                           | 2 | 2.75 | 0.10 | -3.12 |
| IPI00026530 | Protein ERGIC-53 precursor                                                 | K.GHPDLQGQPAEEIFESVGDR.E               | 3 | 5.13 | 0.41 | -2.83 |
| IPI00026546 | Platelet-activating factor acetylhydrolase IB subunit beta                 | K.DKEPDVLFVGDSMVQLMQQYEIWR.E           | 3 | 4.80 | 0.22 | -2.65 |
| IPI00026546 | Platelet-activating factor acetylhydrolase IB subunit beta                 | R.ELFSPHALNFGIGGDTTR.H                 | 3 | 3.19 | 0.08 | -3.43 |
| IPI00026570 | Cytochrome c oxidase polypeptide VIIa-liver/heart, mitochondrial precursor | R.ATM*ILTVGGTAYAIYELAVASFPKK.Q         | 3 | 2.91 | 0.11 |       |
| IPI00026612 | Isoform Beta-1 of Protein phosphatase 1B                                   | S.TAVGVMISPK.H                         | 2 | 3.22 | 0.16 | 0.77  |
| IPI00026665 | Glutaminyl-tRNA synthetase                                                 | R.MKLV*EDGKM*DPVAYRVKYTPHHR.T          | 3 | 3.15 | 0.17 |       |
| IPI00026800 | Scrapie-responsive protein 1 precursor                                     | K.DVFFGPK.I                            | 1 | 2.18 | 0.16 | -3.45 |
| IPI00026800 | Scrapie-responsive protein 1 precursor                                     | K.DVFFGPK.I                            | 2 | 2.15 | 0.16 | -2.86 |
| IPI00026800 | Scrapie-responsive protein 1 precursor                                     | K.GCEMICYCNFSELLCCPK.D                 | 2 | 3.76 | 0.30 |       |
| IPI00026800 | Scrapie-responsive protein 1 precursor                                     | K.GCEMICYCNFSELLCCPK.D                 | 3 | 3.41 | 0.13 |       |
| IPI00026944 | Isoform 1 of Nidogen-1 precursor                                           | C.LSRQELFPFGPGQGDLELEDGDFVSPAELSGALR.F | 3 | 7.07 | 0.58 | -3.86 |
| IPI00026944 | Isoform 1 of Nidogen-1 precursor                                           | K.AFLHVPK.V                            | 2 | 2.41 | 0.09 | -2.92 |
| IPI00026944 | Isoform 1 of Nidogen-1 precursor                                           | K.ALEGLQYPFAVTSYGK.N                   | 2 | 4.93 | 0.55 | -4.69 |
| IPI00026944 | Isoform 1 of Nidogen-1 precursor                                           | K.ESHPGLFPPTFGAVAPFLADLDTTDLGLK.V      | 3 | 5.87 | 0.56 | -4.74 |
| IPI00026944 | Isoform 1 of Nidogen-1 precursor                                           | K.ETDAFQPHKQTR.L                       | 2 | 2.79 | 0.32 | -2.24 |
| IPI00026944 | Isoform 1 of Nidogen-1 precursor                                           | K.IETSYM*DGTNR.R                       | 2 | 2.55 | 0.23 | -2.29 |
| IPI00026944 | Isoform 1 of Nidogen-1 precursor                                           | K.M*VYWTDITEPSIGR.A                    | 2 | 4.28 | 0.40 | -2.60 |
| IPI00026944 | Isoform 1 of Nidogen-1 precursor                                           | K.NGFSITGGEFTR.Q                       | 2 | 2.97 | 0.28 | -4.62 |



|             |                                  |                                        |   |      |      |       |
|-------------|----------------------------------|----------------------------------------|---|------|------|-------|
| IPI00026944 | Isoform 1 of Nidogen-1 precursor | K.VIIGLAFDCVDK.M                       | 2 | 3.99 | 0.45 | -3.02 |
| IPI00026944 | Isoform 1 of Nidogen-1 precursor | K.VYYREDLSPSITQR.A                     | 2 | 4.43 | 0.45 | -2.56 |
| IPI00026944 | Isoform 1 of Nidogen-1 precursor | R.AECLNPSQPSR.R                        | 2 | 3.02 | 0.24 | -1.38 |
| IPI00026944 | Isoform 1 of Nidogen-1 precursor | R.ASLHGGEPPTIIRQDLGSPEGIAVDHLGR.N      | 4 | 5.50 | 0.51 | -3.12 |
| IPI00026944 | Isoform 1 of Nidogen-1 precursor | R.EDLSPSITQR.A                         | 2 | 2.89 | 0.22 | -3.61 |
| IPI00026944 | Isoform 1 of Nidogen-1 precursor | R.EYVTEPER.D                           | 2 | 2.29 | 0.27 | -2.63 |
| IPI00026944 | Isoform 1 of Nidogen-1 precursor | R.EYVTEPERDGASPSR.I                    | 3 | 2.35 | 0.12 | -1.10 |
| IPI00026944 | Isoform 1 of Nidogen-1 precursor | R.FYDRSDIDAVYVTTNGIIATSEPPAK.E         | 3 | 3.17 | 0.33 | 0.39  |
| IPI00026944 | Isoform 1 of Nidogen-1 precursor | R.GFPEISFQPSSAVVVTWESVAPYQGSPSRDPDQK.G | 3 | 3.34 | 0.24 | -5.37 |
| IPI00026944 | Isoform 1 of Nidogen-1 precursor | R.GFPEISFQPSSAVVVTWESVAPYQGSPSRDPDQK.G | 4 | 3.34 | 0.11 | -6.30 |
| IPI00026944 | Isoform 1 of Nidogen-1 precursor | R.GGADTYSVPSVLSPR.R                    | 2 | 2.56 | 0.13 | -1.97 |
| IPI00026944 | Isoform 1 of Nidogen-1 precursor | R.GIVTDSVR.G                           | 2 | 2.14 | 0.17 | -2.13 |
| IPI00026944 | Isoform 1 of Nidogen-1 precursor | R.GNLYWTDWNR.D                         | 2 | 2.70 | 0.29 | -1.23 |
| IPI00026944 | Isoform 1 of Nidogen-1 precursor | R.IFVGSSQPIVFENTDLHSYVVM*NHGR.S        | 4 | 2.55 | 0.11 | -3.84 |
| IPI00026944 | Isoform 1 of Nidogen-1 precursor | R.KALEGLQYPAVTSYGK.N                   | 2 | 5.18 | 0.53 | -4.19 |
| IPI00026944 | Isoform 1 of Nidogen-1 precursor | R.QAEVTFVGHGPNLVIK.Q                   | 3 | 2.13 | 0.14 | -2.55 |
| IPI00026944 | Isoform 1 of Nidogen-1 precursor | R.QDLGSPEGIAVDHLGR.N                   | 2 | 2.67 | 0.30 | -2.05 |
| IPI00026944 | Isoform 1 of Nidogen-1 precursor | R.QDLGSPEGIAVDHLGR.N                   | 3 | 2.23 | 0.16 | -0.35 |
| IPI00026944 | Isoform 1 of Nidogen-1 precursor | R.QELFPFGPGQGDELEDGDDFVSPALELSGALR.F   | 2 | 2.13 | 0.37 | -2.51 |
| IPI00026944 | Isoform 1 of Nidogen-1 precursor | R.QELFPFGPGQGDELEDGDDFVSPALELSGALR.F   | 3 | 5.66 | 0.49 | -3.14 |
| IPI00026944 | Isoform 1 of Nidogen-1 precursor | R.QELFPFGPGQGDELEDGDDFVSPALELSGALR.F   | 4 | 4.02 | 0.39 | -2.68 |
| IPI00026944 | Isoform 1 of Nidogen-1 precursor | R.RGGADTYSVPSVLSPR.R                   | 2 | 3.25 | 0.32 | -3.12 |
| IPI00026944 | Isoform 1 of Nidogen-1 precursor | R.RVLFETDLVNPR.G                       | 2 | 3.12 | 0.35 | -4.36 |
| IPI00026944 | Isoform 1 of Nidogen-1 precursor | R.RVLFETDLVNPR.G                       | 3 | 2.48 | 0.21 | -2.61 |
| IPI00026944 | Isoform 1 of Nidogen-1 precursor | R.SDIDAVYVTTNGIIATSEPPAK.E             | 3 | 3.28 | 0.06 | 0.46  |
| IPI00026944 | Isoform 1 of Nidogen-1 precursor | R.SFQLAVETFHQH.H                       | 2 | 3.81 | 0.33 | -5.92 |
| IPI00026944 | Isoform 1 of Nidogen-1 precursor | R.TQFTCECSIGFR.G                       | 2 | 3.78 | 0.43 | -3.06 |
| IPI00026944 | Isoform 1 of Nidogen-1 precursor | R.VLFETDLVNPR.G                        | 2 | 2.97 | 0.39 | -3.10 |
| IPI00026944 | Isoform 1 of Nidogen-1 precursor | R.VPQIPFGSSVHIEPYTELYHYSTSVITSSSTR.E   | 4 | 2.86 | 0.17 | -2.70 |
| IPI00026946 | Neuronal pentraxin-2 precursor   | H.PIKPGGVLLILGQEQDTVGGF.F              | 3 | 4.83 | 0.40 | -2.01 |
| IPI00026946 | Neuronal pentraxin-2 precursor   | K.DRLESLEHQLR.A                        | 2 | 3.27 | 0.23 | -0.75 |
| IPI00026946 | Neuronal pentraxin-2 precursor   | K.DRLESLEHQLR.A                        | 3 | 3.27 | 0.23 | -1.41 |
| IPI00026946 | Neuronal pentraxin-2 precursor   | K.DTM*GDLPR.D                          | 2 | 2.20 | 0.21 | -3.30 |
| IPI00026946 | Neuronal pentraxin-2 precursor   | K.SPDAFKVSLPLR.T                       | 3 | 4.11 | 0.30 | -3.55 |
| IPI00026946 | Neuronal pentraxin-2 precursor   | K.TESTLNALLQR.V                        | 2 | 3.95 | 0.29 | -2.86 |
| IPI00026946 | Neuronal pentraxin-2 precursor   | K.VAQLPLFVSDGK.W                       | 2 | 3.27 | 0.35 | -2.73 |
| IPI00026946 | Neuronal pentraxin-2 precursor   | K.WPVETCEER.L                          | 2 | 2.71 | 0.29 | -3.79 |
| IPI00026946 | Neuronal pentraxin-2 precursor   | P.M*QGGAQSPEEELR.A                     | 2 | 4.17 | 0.41 | -2.82 |
| IPI00026946 | Neuronal pentraxin-2 precursor   | R.DGM*WEAFQDGEK.L                      | 2 | 3.78 | 0.38 | -2.79 |
| IPI00026946 | Neuronal pentraxin-2 precursor   | R.EAIRELTGK.L                          | 1 | 2.05 | 0.18 | -3.89 |
| IPI00026946 | Neuronal pentraxin-2 precursor   | R.FDATQAFVSGELSQFNIWDR.V               | 2 | 5.83 | 0.51 | -4.65 |
| IPI00026946 | Neuronal pentraxin-2 precursor   | R.GAGATGKDTM*GDLPR.D                   | 2 | 2.69 | 0.21 | -1.98 |

|             |                                                                                |                                        |   |      |      |       |
|-------------|--------------------------------------------------------------------------------|----------------------------------------|---|------|------|-------|
| IPI00026946 | Neuronal pentraxin-2 precursor                                                 | R.GNSAFKSPDAFK.V                       | 2 | 2.84 | 0.28 | -2.16 |
| IPI00026946 | Neuronal pentraxin-2 precursor                                                 | R.LESLEHQLR.A                          | 2 | 3.33 | 0.23 | -2.71 |
| IPI00026946 | Neuronal pentraxin-2 precursor                                                 | R.QKTESTLNALLQR.V                      | 2 | 2.76 | 0.42 | -4.01 |
| IPI00026946 | Neuronal pentraxin-2 precursor                                                 | R.SLQTLKDR.L                           | 2 | 2.08 | 0.06 | -0.51 |
| IPI00026991 | Polypeptide N-acetylgalactosaminyltransferase 6                                | K.SPTFAGGLFSISK.S                      | 2 | 3.73 | 0.44 | -3.33 |
| IPI00026991 | Polypeptide N-acetylgalactosaminyltransferase 6                                | R.IAEDKTVVSPDIVTIDLNTFEFAKPVQR.G       | 4 | 4.70 | 0.37 | -2.14 |
| IPI00026991 | Polypeptide N-acetylgalactosaminyltransferase 6                                | R.TVYSVLHTTPAILLK.E                    | 2 | 3.07 | 0.34 | -3.48 |
| IPI00027009 | Isoform 1 of Protein kinase C and casein kinase substrate in neurons protein 2 | K.QMM*GGFK.E                           | 2 | 1.57 | 0.16 |       |
| IPI00027038 | Isoform 1 of V-set and immunoglobulin domain-containing protein 4 precursor    | K.GDVNLPCTYDPLQGYTQVLVK.W              | 2 | 4.65 | 0.54 | -4.33 |
| IPI00027038 | Isoform 1 of V-set and immunoglobulin domain-containing protein 4 precursor    | K.GDVNLPCTYDPLQGYTQVLVK.W              | 3 | 2.55 | 0.16 | -5.63 |
| IPI00027038 | Isoform 1 of V-set and immunoglobulin domain-containing protein 4 precursor    | K.GQVGSEQHSDIVK.F                      | 2 | 3.65 | 0.34 | -3.62 |
| IPI00027038 | Isoform 1 of V-set and immunoglobulin domain-containing protein 4 precursor    | K.LSVSKPTVTGSGYGFTVPQGM*R.I            | 2 | 4.46 | 0.50 | -3.82 |
| IPI00027038 | Isoform 1 of V-set and immunoglobulin domain-containing protein 4 precursor    | K.VPGDVSLQLSTLEM*DDR.S                 | 2 | 4.17 | 0.43 | -3.85 |
| IPI00027038 | Isoform 1 of V-set and immunoglobulin domain-containing protein 4 precursor    | R.DKITELR.V                            | 1 | 2.02 | 0.14 | -2.88 |
| IPI00027038 | Isoform 1 of V-set and immunoglobulin domain-containing protein 4 precursor    | R.DSSGDHIQQAQ.Y                        | 2 | 2.76 | 0.28 | 0.68  |
| IPI00027038 | Isoform 1 of V-set and immunoglobulin domain-containing protein 4 precursor    | R.GSDPVTIFLR.D                         | 2 | 3.05 | 0.32 | -3.58 |
| IPI00027038 | Isoform 1 of V-set and immunoglobulin domain-containing protein 4 precursor    | R.GSPPIYIWK.Q                          | 2 | 1.76 | 0.10 | -4.56 |
| IPI00027038 | Isoform 1 of V-set and immunoglobulin domain-containing protein 4 precursor    | R.SHYTCEVTWQTPDGNQVVR.D                | 2 | 4.47 | 0.50 | -1.64 |
| IPI00027038 | Isoform 1 of V-set and immunoglobulin domain-containing protein 4 precursor    | R.SHYTCEVTWQTPDGNQVVR.D                | 3 | 4.14 | 0.44 | -2.10 |
| IPI00027078 | Carboxypeptidase D precursor                                                   | K.LVGNM*HGDETVSR.Q                     | 2 | 3.62 | 0.43 | -3.46 |
| IPI00027078 | Carboxypeptidase D precursor                                                   | K.SQEGDSISVIGR.N                       | 2 | 3.11 | 0.32 | -2.77 |
| IPI00027078 | Carboxypeptidase D precursor                                                   | R.EAAAAGLPLGLAR.L                      | 2 | 2.81 | 0.26 | -1.61 |
| IPI00027078 | Carboxypeptidase D precursor                                                   | R.GFVLDATDGR.G                         | 2 | 2.55 | 0.32 | -3.03 |
| IPI00027078 | Carboxypeptidase D precursor                                                   | R.LTAGLGS�IPEGDAGPDAAGPDAAGPLLPGRPVK.L | 3 | 4.10 | 0.49 | -5.16 |
| IPI00027078 | Carboxypeptidase D precursor                                                   | R.NKFVLSGNLHGGSVVASYPFDDSPCHK.A        | 4 | 3.36 | 0.27 | -4.67 |
| IPI00027087 | Isoform 1 of Neural cell adhesion molecule L1 precursor                        | A.VQGSTAYLLCK.A                        | 2 | 2.95 | 0.40 | -1.53 |
| IPI00027087 | Isoform 1 of Neural cell adhesion molecule L1 precursor                        | K.AFGAPVPSVQWLDEDGTTVLQDER.F           | 2 | 5.67 | 0.57 | -5.12 |

|             |                                                         |                                  |   |      |      |       |
|-------------|---------------------------------------------------------|----------------------------------|---|------|------|-------|
| IPI00027087 | Isoform 1 of Neural cell adhesion molecule L1 precursor | K.AFGAPVPSVQWLDEGTTVLQDER.F      | 3 | 4.31 | 0.43 | -4.08 |
| IPI00027087 | Isoform 1 of Neural cell adhesion molecule L1 precursor | K.ATNSM*IDR.K                    | 2 | 2.62 | 0.39 | -2.80 |
| IPI00027087 | Isoform 1 of Neural cell adhesion molecule L1 precursor | K.DATQITQGPR.S                   | 2 | 2.41 | 0.17 | -3.44 |
| IPI00027087 | Isoform 1 of Neural cell adhesion molecule L1 precursor | K.ETVKPVEVEEGESVVLPCNPPPSAEPLR.I | 3 | 4.57 | 0.37 | -2.08 |
| IPI00027087 | Isoform 1 of Neural cell adhesion molecule L1 precursor | K.LSPYVHYTFR.V                   | 2 | 2.34 | 0.24 | -3.07 |
| IPI00027087 | Isoform 1 of Neural cell adhesion molecule L1 precursor | K.VGEEDDGEYR.C                   | 2 | 3.10 | 0.34 | -2.42 |
| IPI00027087 | Isoform 1 of Neural cell adhesion molecule L1 precursor | K.VKDATQITQGPR.S                 | 2 | 3.74 | 0.33 | -2.97 |
| IPI00027087 | Isoform 1 of Neural cell adhesion molecule L1 precursor | K.YGPGEPSPVSETVVTPEAAPEK.N       | 2 | 5.13 | 0.48 | -4.39 |
| IPI00027087 | Isoform 1 of Neural cell adhesion molecule L1 precursor | K.YGPGEPSPVSETVVTPEAAPEKNPVDVK.G | 3 | 3.68 | 0.36 | -2.97 |
| IPI00027087 | Isoform 1 of Neural cell adhesion molecule L1 precursor | L.IQIPEEYEGHHVM*EPPVITEQSPR.R    | 3 | 4.12 | 0.41 | -3.75 |
| IPI00027087 | Isoform 1 of Neural cell adhesion molecule L1 precursor | R.AQLLVVGGSPGPVPR.L              | 2 | 3.58 | 0.26 | -1.96 |
| IPI00027087 | Isoform 1 of Neural cell adhesion molecule L1 precursor | R.CLAENSLGSAR.H                  | 1 | 2.49 | 0.36 | -3.68 |
| IPI00027087 | Isoform 1 of Neural cell adhesion molecule L1 precursor | R.CLAENSLGSAR.H                  | 2 | 3.69 | 0.32 | -1.88 |
| IPI00027087 | Isoform 1 of Neural cell adhesion molecule L1 precursor | R.DLQELGDSKDYFIEDGR.L            | 3 | 3.28 | 0.15 | -2.63 |
| IPI00027087 | Isoform 1 of Neural cell adhesion molecule L1 precursor | R.FLQATTK.E                      | 1 | 1.98 | 0.06 | -3.22 |
| IPI00027087 | Isoform 1 of Neural cell adhesion molecule L1 precursor | R.GALILSNVQPSDTM*VTQCEAR.N       | 2 | 6.30 | 0.60 | -2.89 |
| IPI00027087 | Isoform 1 of Neural cell adhesion molecule L1 precursor | R.GALILSNVQPSDTM*VTQCEAR.N       | 3 | 3.05 | 0.33 | -3.01 |
| IPI00027087 | Isoform 1 of Neural cell adhesion molecule L1 precursor | R.GDGRDLQELGDSKDYFIEDGR.L        | 3 | 4.17 | 0.43 | -2.69 |
| IPI00027087 | Isoform 1 of Neural cell adhesion molecule L1 precursor | R.GDGRDLQELGDSKDYFIEDGR.L        | 4 | 3.29 | 0.31 | -2.39 |
| IPI00027087 | Isoform 1 of Neural cell adhesion molecule L1 precursor | R.LVLSDLHLLTQSQVR.V              | 2 | 5.14 | 0.48 | -2.16 |
| IPI00027087 | Isoform 1 of Neural cell adhesion molecule L1 precursor | R.LVLSDLHLLTQSQVR.V              | 3 | 4.97 | 0.46 | -2.70 |

|             |                                                             |                                     |   |      |      |       |
|-------------|-------------------------------------------------------------|-------------------------------------|---|------|------|-------|
| IPI00027087 | Isoform 1 of Neural cell adhesion molecule L1 precursor     | R.LVVFPDDISLK.C                     | 2 | 3.10 | 0.35 | -1.20 |
| IPI00027087 | Isoform 1 of Neural cell adhesion molecule L1 precursor     | R.RLVVFPDDISLK.C                    | 2 | 4.07 | 0.24 | -4.15 |
| IPI00027087 | Isoform 1 of Neural cell adhesion molecule L1 precursor     | R.TIIQKEPIDLR.V                     | 2 | 2.74 | 0.19 | -3.20 |
| IPI00027087 | Isoform 1 of Neural cell adhesion molecule L1 precursor     | W.LDEDGTTVLQDER.F                   | 2 | 4.24 | 0.39 | -1.62 |
| IPI00027087 | Isoform 1 of Neural cell adhesion molecule L1 precursor     | W.SPAEDHNAPIEK.Y                    | 2 | 3.30 | 0.36 | -3.28 |
| IPI00027166 | Metalloproteinase inhibitor 2 precursor                     | K.AVSEKEVDSGNDIYGNIPIK.R            | 3 | 3.27 | 0.16 | -1.42 |
| IPI00027166 | Metalloproteinase inhibitor 2 precursor                     | K.AVSEKEVDSGNDIYGNIPIK.I            | 2 | 5.53 | 0.52 | -4.58 |
| IPI00027166 | Metalloproteinase inhibitor 2 precursor                     | K.AVSEKEVDSGNDIYGNIPIK.I            | 3 | 5.56 | 0.45 | -1.81 |
| IPI00027166 | Metalloproteinase inhibitor 2 precursor                     | K.AVSEKEVDSGNDIYGNIPIK.I            | 4 | 2.34 | 0.15 | 1.46  |
| IPI00027166 | Metalloproteinase inhibitor 2 precursor                     | K.DIEFIYTAPSSAVCGVSLDVGGK.K         | 2 | 2.43 | 0.18 |       |
| IPI00027166 | Metalloproteinase inhibitor 2 precursor                     | K.EVDSGNDIYGNIPIK.I                 | 2 | 4.12 | 0.40 | -3.25 |
| IPI00027166 | Metalloproteinase inhibitor 2 precursor                     | K.EYLIAGKAEGDGK.M                   | 2 | 3.63 | 0.28 | -0.10 |
| IPI00027166 | Metalloproteinase inhibitor 2 precursor                     | K.KEYLIAGK.A                        | 2 | 2.18 | 0.05 | -2.73 |
| IPI00027166 | Metalloproteinase inhibitor 2 precursor                     | K.M*FKGPEKDIEFIYTAPSSAVCGVSLDVGGK.E | 3 | 5.76 | 0.51 | -4.29 |
| IPI00027166 | Metalloproteinase inhibitor 2 precursor                     | K.M*FKGPEKDIEFIYTAPSSAVCGVSLDVGGK.E | 4 | 2.82 | 0.14 | -3.24 |
| IPI00027166 | Metalloproteinase inhibitor 2 precursor                     | K.M*HITLCDFIVPWDTLSTTQK.K           | 3 | 2.91 | 0.25 | -2.71 |
| IPI00027166 | Metalloproteinase inhibitor 2 precursor                     | R.AKAVSEKEVDSGNDIYGNIPIK.I          | 2 | 5.57 | 0.55 | -3.01 |
| IPI00027166 | Metalloproteinase inhibitor 2 precursor                     | R.AKAVSEKEVDSGNDIYGNIPIK.I          | 3 | 6.54 | 0.52 | -3.56 |
| IPI00027166 | Metalloproteinase inhibitor 2 precursor                     | R.AKAVSEKEVDSGNDIYGNIPIK.I          | 4 | 4.21 | 0.47 | -2.00 |
| IPI00027166 | Metalloproteinase inhibitor 2 precursor                     | R.GAAPPKQEFLDIEDP.-                 | 2 | 3.11 | 0.24 | -3.42 |
| IPI00027166 | Metalloproteinase inhibitor 2 precursor                     | R.SDGSCAWYR.G                       | 2 | 2.60 | 0.32 | -1.90 |
| IPI00027166 | Metalloproteinase inhibitor 2 precursor                     | R.YQM*GCECK.I                       | 2 | 1.96 | 0.18 |       |
| IPI00027174 | Isoform 1 of Fibroblast growth factor receptor 3 precursor  | K.DGTGLVPSER.V                      | 1 | 2.17 | 0.26 | -2.54 |
| IPI00027174 | Isoform 1 of Fibroblast growth factor receptor 3 precursor  | K.DGTGLVPSER.V                      | 2 | 3.04 | 0.12 | -3.45 |
| IPI00027174 | Isoform 1 of Fibroblast growth factor receptor 3 precursor  | K.KLLAVPAANTVR.F                    | 3 | 2.87 | 0.25 | -4.94 |
| IPI00027174 | Isoform 1 of Fibroblast growth factor receptor 3 precursor  | K.LLAVPAANTVR.F                     | 2 | 2.39 | 0.17 | -2.73 |
| IPI00027174 | Isoform 1 of Fibroblast growth factor receptor 3 precursor  | K.VGPDGTPYVTVLK.T                   | 2 | 3.29 | 0.35 | -1.93 |
| IPI00027174 | Isoform 1 of Fibroblast growth factor receptor 3 precursor  | R.CPAAGNPTPSISWLK.N                 | 2 | 4.18 | 0.40 | -3.01 |
| IPI00027192 | Procollagen-lysine,2-oxoglutarate 5-dioxygenase 1 precursor | A.KGDAKPEDNLLVLTATK.E               | 3 | 3.99 | 0.48 | -4.10 |

|             |                                                             |                             |   |      |      |       |
|-------------|-------------------------------------------------------------|-----------------------------|---|------|------|-------|
| IPI00027192 | Procollagen-lysine,2-oxoglutarate 5-dioxygenase 1 precursor | K.AQVEEFLAQHGSEYQSVK.L      | 2 | 5.17 | 0.45 | -2.13 |
| IPI00027192 | Procollagen-lysine,2-oxoglutarate 5-dioxygenase 1 precursor | K.AQVEEFLAQHGSEYQSVK.L      | 3 | 3.11 | 0.21 | -1.81 |
| IPI00027192 | Procollagen-lysine,2-oxoglutarate 5-dioxygenase 1 precursor | K.FLLEYIAPM*TEK.L           | 2 | 4.50 | 0.28 | -2.49 |
| IPI00027192 | Procollagen-lysine,2-oxoglutarate 5-dioxygenase 1 precursor | K.LQLNYLGNYP.R              | 2 | 3.74 | 0.37 | -4.33 |
| IPI00027192 | Procollagen-lysine,2-oxoglutarate 5-dioxygenase 1 precursor | R.FLGSGGFIGYAPNLSK.L        | 2 | 5.23 | 0.45 | -4.26 |
| IPI00027192 | Procollagen-lysine,2-oxoglutarate 5-dioxygenase 1 precursor | R.GELQSSDLFHHSK.L           | 2 | 3.31 | 0.39 | -3.35 |
| IPI00027192 | Procollagen-lysine,2-oxoglutarate 5-dioxygenase 1 precursor | R.IFQNLGDALDEVVLK.F         | 2 | 4.98 | 0.28 | -2.44 |
| IPI00027192 | Procollagen-lysine,2-oxoglutarate 5-dioxygenase 1 precursor | R.IFQNLGDALDEVVLKFEM*GHVR.A | 4 | 3.68 | 0.23 | -5.06 |
| IPI00027192 | Procollagen-lysine,2-oxoglutarate 5-dioxygenase 1 precursor | R.IQGGYENVPTIDIHM*NQIGFER.E | 3 | 3.49 | 0.23 | -0.72 |
| IPI00027192 | Procollagen-lysine,2-oxoglutarate 5-dioxygenase 1 precursor | R.LETKYPVVS DGKR.F          | 3 | 3.09 | 0.32 | -0.76 |
| IPI00027192 | Procollagen-lysine,2-oxoglutarate 5-dioxygenase 1 precursor | R.QQDVFM*FLTNR.H            | 2 | 2.56 | 0.33 | -4.94 |
| IPI00027192 | Procollagen-lysine,2-oxoglutarate 5-dioxygenase 1 precursor | R.SAQFFNYK.I                | 2 | 2.53 | 0.28 | -1.26 |
| IPI00027192 | Procollagen-lysine,2-oxoglutarate 5-dioxygenase 1 precursor | R.SEDYVDIVQGR.R             | 2 | 3.69 | 0.43 | -2.34 |
| IPI00027192 | Procollagen-lysine,2-oxoglutarate 5-dioxygenase 1 precursor | R.VGVWNPYISNIYLIK.G         | 2 | 3.48 | 0.39 | -4.24 |
| IPI00027223 | Isocitrate dehydrogenase [NADP] cytoplasmic                 | K.ISGGSVVEM*QGDEM*TR.I      | 2 | 3.80 | 0.38 | -3.01 |
| IPI00027223 | Isocitrate dehydrogenase [NADP] cytoplasmic                 | R.FKDFQEIYDKQYK.S           | 3 | 4.27 | 0.35 | -2.43 |
| IPI00027223 | Isocitrate dehydrogenase [NADP] cytoplasmic                 | R.LIDDM*VAQAM*K.S           | 2 | 3.03 | 0.26 | -3.63 |
| IPI00027223 | Isocitrate dehydrogenase [NADP] cytoplasmic                 | R.NILGGTVFR.E               | 2 | 1.89 | 0.05 | -1.04 |
| IPI00027230 | Endoplasmin precursor                                       | A.DDEVVDV DGTVEEDLGK.S      | 2 | 5.40 | 0.47 | -3.01 |
| IPI00027230 | Endoplasmin precursor                                       | K.AQAYQTGKDISTNYYASQKK.T    | 3 | 3.28 | 0.41 | -1.86 |
| IPI00027230 | Endoplasmin precursor                                       | K.FAFQAEVNR.M               | 2 | 2.81 | 0.29 | -1.56 |
| IPI00027230 | Endoplasmin precursor                                       | K.GVVDSDDLPLNVS.R           | 2 | 4.61 | 0.40 | -3.29 |
| IPI00027230 | Endoplasmin precursor                                       | K.IYFM*AGSSR.K              | 2 | 2.71 | 0.26 | -2.62 |
| IPI00027230 | Endoplasmin precursor                                       | K.LGVIEDHSNR.T              | 2 | 2.63 | 0.17 | -1.34 |
| IPI00027230 | Endoplasmin precursor                                       | K.SILFVPTSAPR.G             | 2 | 2.83 | 0.32 | -3.74 |
| IPI00027230 | Endoplasmin precursor                                       | K.YSQFINFIYVWSSK.T          | 2 | 4.39 | 0.43 | -3.54 |
| IPI00027230 | Endoplasmin precursor                                       | R.FQSSHPTDITSLDQYVER.M      | 3 | 5.83 | 0.42 | -3.85 |
| IPI00027230 | Endoplasmin precursor                                       | R.FQSSHPTDITSLDQYVER.M      | 4 | 3.36 | 0.24 | -2.97 |

|             |                                                                               |                              |   |      |      |       |
|-------------|-------------------------------------------------------------------------------|------------------------------|---|------|------|-------|
| IPI00027230 | Endoplasmin precursor                                                         | R.GLFDEYGSK.K                | 2 | 1.71 | 0.22 | -2.18 |
| IPI00027230 | Endoplasmin precursor                                                         | R.IKEDEDDKTVLDLAVVLFETATLR.S | 3 | 3.60 | 0.27 | -3.72 |
| IPI00027230 | Endoplasmin precursor                                                         | R.SGYLLPDTK.A                | 2 | 2.57 | 0.10 | -1.99 |
| IPI00027230 | Endoplasmin precursor                                                         | R.VFITDDFHDM*M*PK.Y          | 2 | 3.16 | 0.43 | -0.02 |
| IPI00027239 | Isoform Alpha of Tumor necrosis factor ligand superfamily member 13 precursor | A.LLTQQTELQSLR.R             | 2 | 3.57 | 0.40 | -3.28 |
| IPI00027239 | Isoform Alpha of Tumor necrosis factor ligand superfamily member 13 precursor | L.LTQQTELQSLR.R              | 2 | 3.68 | 0.27 | -3.29 |
| IPI00027248 | Tumor suppressor candidate 2                                                  | K.NLIPQGIVK.L                | 2 | 2.66 | 0.12 |       |
| IPI00027264 | Calretinin                                                                    | R.LLPVQENFLLK.F              | 2 | 2.56 | 0.15 | -3.11 |
| IPI00027310 | Isoform 1 of Multiple epidermal growth factor-like domains 8                  | K.APQTVELPAVAGHTLTAR.R       | 2 | 4.79 | 0.51 | -3.63 |
| IPI00027310 | Isoform 1 of Multiple epidermal growth factor-like domains 8                  | K.APQTVELPAVAGHTLTAR.R       | 3 | 4.05 | 0.45 | -2.13 |
| IPI00027310 | Isoform 1 of Multiple epidermal growth factor-like domains 8                  | K.CESCLQGYFLLDGK.C           | 2 | 5.16 | 0.59 | -3.31 |
| IPI00027310 | Isoform 1 of Multiple epidermal growth factor-like domains 8                  | K.ELQM*SKGEPK.K              | 2 | 2.20 | 0.18 | -3.00 |
| IPI00027310 | Isoform 1 of Multiple epidermal growth factor-like domains 8                  | K.LDGGQLVWETLM*DSR.L         | 2 | 4.35 | 0.43 | -4.24 |
| IPI00027310 | Isoform 1 of Multiple epidermal growth factor-like domains 8                  | K.LDGGQLVWETLM*DSR.L         | 3 | 3.83 | 0.36 | -3.13 |
| IPI00027310 | Isoform 1 of Multiple epidermal growth factor-like domains 8                  | K.WCTNCEGACIGR.N             | 2 | 4.19 | 0.41 | -4.04 |
| IPI00027310 | Isoform 1 of Multiple epidermal growth factor-like domains 8                  | R.CM*EGGLSGPR.D              | 2 | 2.84 | 0.32 | -1.37 |
| IPI00027310 | Isoform 1 of Multiple epidermal growth factor-like domains 8                  | R.FLDTGVVQSDR.S              | 2 | 4.23 | 0.29 | -3.20 |
| IPI00027310 | Isoform 1 of Multiple epidermal growth factor-like domains 8                  | R.GAM*YLLGGLTAGGVTR.D        | 2 | 5.09 | 0.45 | -3.54 |
| IPI00027310 | Isoform 1 of Multiple epidermal growth factor-like domains 8                  | R.GAM*YLLGGLTAGGVTR.D        | 3 | 4.67 | 0.30 | -2.11 |
| IPI00027310 | Isoform 1 of Multiple epidermal growth factor-like domains 8                  | R.GDLM*AYK.V                 | 1 | 1.62 | 0.07 | -2.56 |
| IPI00027310 | Isoform 1 of Multiple epidermal growth factor-like domains 8                  | R.GDLM*AYK.V                 | 2 | 2.49 | 0.20 | -3.42 |
| IPI00027310 | Isoform 1 of Multiple epidermal growth factor-like domains 8                  | R.GFIYPM*LPGGPGGPAEDVAVWTR.A | 2 | 4.30 | 0.56 | -4.78 |
| IPI00027310 | Isoform 1 of Multiple epidermal growth factor-like domains 8                  | R.GFIYPM*LPGGPGGPAEDVAVWTR.A | 3 | 3.90 | 0.37 | -4.52 |
| IPI00027310 | Isoform 1 of Multiple epidermal growth factor-like domains 8                  | R.GPDTENM*EEVGR.W            | 2 | 4.07 | 0.43 | -3.69 |

|             |                                                              |                                      |   |      |      |       |
|-------------|--------------------------------------------------------------|--------------------------------------|---|------|------|-------|
| IPI00027310 | Isoform 1 of Multiple epidermal growth factor-like domains 8 | R.GPESCSLGCAQATQCALCLR.R             | 2 | 5.74 | 0.64 | -3.59 |
| IPI00027310 | Isoform 1 of Multiple epidermal growth factor-like domains 8 | R.GPESCSLGCAQATQCALCLR.R             | 3 | 5.56 | 0.44 | -3.06 |
| IPI00027310 | Isoform 1 of Multiple epidermal growth factor-like domains 8 | R.LFHASALLGDTM*VVLGGR.S              | 3 | 3.90 | 0.39 | -2.59 |
| IPI00027310 | Isoform 1 of Multiple epidermal growth factor-like domains 8 | R.LGCGGSPCSPM*PR.S                   | 2 | 3.05 | 0.36 | -2.65 |
| IPI00027310 | Isoform 1 of Multiple epidermal growth factor-like domains 8 | R.LGHTM*VDGPDATLWM*FGGLGLPQGLLNLYR.Y | 3 | 4.95 | 0.32 | -2.31 |
| IPI00027310 | Isoform 1 of Multiple epidermal growth factor-like domains 8 | R.LLALTLPPDPCR.L                     | 2 | 3.46 | 0.41 | -4.32 |
| IPI00027310 | Isoform 1 of Multiple epidermal growth factor-like domains 8 | R.LLGDCQACLAFFSSPTAPPR.G             | 3 | 3.36 | 0.25 | -0.53 |
| IPI00027310 | Isoform 1 of Multiple epidermal growth factor-like domains 8 | R.LLRGPESCSLGCAQATQCALCLR.R          | 3 | 5.42 | 0.39 | -1.68 |
| IPI00027310 | Isoform 1 of Multiple epidermal growth factor-like domains 8 | R.LSADTASR.F                         | 2 | 2.52 | 0.20 | -3.22 |
| IPI00027310 | Isoform 1 of Multiple epidermal growth factor-like domains 8 | R.LYISGGFGGVALGR.L                   | 2 | 4.43 | 0.50 | -3.67 |
| IPI00027310 | Isoform 1 of Multiple epidermal growth factor-like domains 8 | R.M*ARGPDTENM*EEVGR.W                | 3 | 4.09 | 0.31 | -1.81 |
| IPI00027310 | Isoform 1 of Multiple epidermal growth factor-like domains 8 | R.QEKAPQTVELPAVAGHTLTAR.R            | 2 | 4.24 | 0.37 | -3.87 |
| IPI00027310 | Isoform 1 of Multiple epidermal growth factor-like domains 8 | R.QEKAPQTVELPAVAGHTLTAR.R            | 3 | 3.88 | 0.38 | -2.97 |
| IPI00027310 | Isoform 1 of Multiple epidermal growth factor-like domains 8 | R.RVGGLLPPGGAAR.A                    | 2 | 4.59 | 0.41 | -3.31 |
| IPI00027310 | Isoform 1 of Multiple epidermal growth factor-like domains 8 | R.SASVGPPM*EESVAHAVAAVGSR.L          | 2 | 5.06 | 0.56 | -2.37 |
| IPI00027310 | Isoform 1 of Multiple epidermal growth factor-like domains 8 | R.SASVGPPM*EESVAHAVAAVGSR.L          | 3 | 3.17 | 0.49 | -3.84 |
| IPI00027310 | Isoform 1 of Multiple epidermal growth factor-like domains 8 | R.SFHAAAYVPAGR.G                     | 1 | 3.37 | 0.33 | -3.97 |
| IPI00027310 | Isoform 1 of Multiple epidermal growth factor-like domains 8 | R.SFHAAAYVPAGR.G                     | 2 | 3.70 | 0.47 | -3.81 |
| IPI00027310 | Isoform 1 of Multiple epidermal growth factor-like domains 8 | R.SLIAAFCGQR.R                       | 1 | 1.30 | 0.09 | -2.30 |
| IPI00027310 | Isoform 1 of Multiple epidermal growth factor-like domains 8 | R.SLIAAFCGQR.R                       | 2 | 3.69 | 0.39 | -1.86 |
| IPI00027310 | Isoform 1 of Multiple epidermal growth factor-like domains 8 | R.STTITLTPSAETDVSIVYR.G              | 2 | 4.94 | 0.55 | -7.92 |

|             |                                                              |                                 |   |      |      |       |
|-------------|--------------------------------------------------------------|---------------------------------|---|------|------|-------|
| IPI00027310 | Isoform 1 of Multiple epidermal growth factor-like domains 8 | R.STTITLTPSAETDVS LVYR.G        | 3 | 2.27 | 0.18 | -3.16 |
| IPI00027310 | Isoform 1 of Multiple epidermal growth factor-like domains 8 | R.TGVPGGSEISFFFLEPYR.S          | 2 | 4.50 | 0.26 | -7.13 |
| IPI00027310 | Isoform 1 of Multiple epidermal growth factor-like domains 8 | R.TGVPGGSEISFFFLEPYR.S          | 3 | 3.97 | 0.13 | -3.40 |
| IPI00027310 | Isoform 1 of Multiple epidermal growth factor-like domains 8 | R.TLQPGDGEASTPR.C               | 1 | 1.97 | 0.27 | -1.84 |
| IPI00027310 | Isoform 1 of Multiple epidermal growth factor-like domains 8 | R.TLQPGDGEASTPR.C               | 2 | 3.56 | 0.42 | -3.28 |
| IPI00027310 | Isoform 1 of Multiple epidermal growth factor-like domains 8 | R.TLQPGDGEASTPR.C               | 3 | 2.65 | 0.12 | -2.26 |
| IPI00027310 | Isoform 1 of Multiple epidermal growth factor-like domains 8 | R.TWSSLAPSQGAK.R                | 1 | 2.36 | 0.29 | -1.83 |
| IPI00027310 | Isoform 1 of Multiple epidermal growth factor-like domains 8 | R.TWSSLAPSQGAK.R                | 2 | 2.99 | 0.21 | -2.12 |
| IPI00027310 | Isoform 1 of Multiple epidermal growth factor-like domains 8 | R.VGGLLPPGGGAAR.A               | 2 | 2.61 | 0.16 | -2.40 |
| IPI00027310 | Isoform 1 of Multiple epidermal growth factor-like domains 8 | R.WTQM*LAGAEDGGPGSPR.S          | 2 | 4.66 | 0.51 | -6.90 |
| IPI00027310 | Isoform 1 of Multiple epidermal growth factor-like domains 8 | W.TQM*LAGAEDGGPGSPR.S           | 2 | 4.54 | 0.50 | -3.94 |
| IPI00027310 | Isoform 1 of Multiple epidermal growth factor-like domains 8 | W.VGEGGLPVALPAR.W               | 2 | 3.04 | 0.24 | -1.28 |
| IPI00027341 | Macrophage-capping protein                                   | K.AQVEIVTDGEEPAEM*IQVLGPKPALK.E | 3 | 4.40 | 0.48 | -2.06 |
| IPI00027341 | Macrophage-capping protein                                   | K.TSTGAPAAIKK.L                 | 2 | 2.00 | 0.27 | 1.26  |
| IPI00027341 | Macrophage-capping protein                                   | K.VSDATGQM*NLTK.V               | 2 | 3.90 | 0.45 | -3.66 |
| IPI00027341 | Macrophage-capping protein                                   | R.QAALQVAEGFISR.M               | 2 | 4.00 | 0.43 | -2.61 |
| IPI00027350 | Peroxiredoxin-2                                              | K.ATAVVDGAFK.E                  | 2 | 2.72 | 0.29 | -1.88 |
| IPI00027350 | Peroxiredoxin-2                                              | K.EGGLGPLNIPLLADVTR.R           | 2 | 5.21 | 0.52 | -5.12 |
| IPI00027350 | Peroxiredoxin-2                                              | K.EGGLGPLNIPLLADVTRR.L          | 3 | 2.05 | 0.12 | -2.42 |
| IPI00027350 | Peroxiredoxin-2                                              | K.LGCEVLGVSVD SQFTHLAWINTPR.K   | 3 | 3.39 | 0.29 | -3.54 |
| IPI00027350 | Peroxiredoxin-2                                              | K.TDEGIAYR.G                    | 1 | 1.38 | 0.08 | -4.31 |
| IPI00027350 | Peroxiredoxin-2                                              | K.TDEGIAYR.G                    | 2 | 2.35 | 0.20 | -2.76 |
| IPI00027350 | Peroxiredoxin-2                                              | R.GLFIIDGK.G                    | 2 | 2.10 | 0.11 | -2.90 |
| IPI00027350 | Peroxiredoxin-2                                              | R.IGKPAPDFK.A                   | 2 | 2.13 | 0.10 | -3.36 |
| IPI00027350 | Peroxiredoxin-2                                              | R.KEGGLGPLNIPLLADVTR.R          | 2 | 5.45 | 0.60 | -3.67 |
| IPI00027350 | Peroxiredoxin-2                                              | R.KEGGLGPLNIPLLADVTRR.R         | 3 | 3.75 | 0.39 | -2.87 |
| IPI00027350 | Peroxiredoxin-2                                              | R.KEGGLGPLNIPLLADVTRR.L         | 2 | 2.55 | 0.15 | -4.58 |
| IPI00027350 | Peroxiredoxin-2                                              | R.KEGGLGPLNIPLLADVTRR.L         | 3 | 4.21 | 0.46 | -4.14 |
| IPI00027350 | Peroxiredoxin-2                                              | R.KEGGLGPLNIPLLADVTRR.L         | 4 | 3.16 | 0.21 | -2.16 |
| IPI00027350 | Peroxiredoxin-2                                              | R.LSEDYGV LK.T                  | 2 | 3.09 | 0.22 | -1.56 |



|             |                                                |                                        |   |      |      |       |
|-------------|------------------------------------------------|----------------------------------------|---|------|------|-------|
| IPI00027350 | Peroxiredoxin-2                                | R.LSE DYGV LKTDEGIAYR.G                | 2 | 4.58 | 0.54 | -3.52 |
| IPI00027350 | Peroxiredoxin-2                                | R.LSE DYGV LKTDEGIAYR.G                | 3 | 4.43 | 0.48 | -1.64 |
| IPI00027350 | Peroxiredoxin-2                                | R.QITVNDLPVGR.S                        | 1 | 1.08 | 0.06 | -3.33 |
| IPI00027350 | Peroxiredoxin-2                                | R.QITVNDLPVGR.S                        | 2 | 2.78 | 0.29 | -3.36 |
| IPI00027350 | Peroxiredoxin-2                                | R.RLSE DYGV LK.T                       | 2 | 2.13 | 0.08 | -0.49 |
| IPI00027350 | Peroxiredoxin-2                                | R.RLSE DYGV LKTDEGIAYR.G               | 3 | 3.26 | 0.28 | -2.09 |
| IPI00027350 | Peroxiredoxin-2                                | R.RLSE DYGV LKTDEGIAYR.G               | 4 | 2.10 | 0.21 | -3.85 |
| IPI00027377 | aggrecan isoform 2 precursor                   | K.VSLPNYPAIPSDATLEVQSLR.S              | 2 | 3.39 | 0.36 | -4.50 |
| IPI00027377 | aggrecan isoform 2 precursor                   | R.TIEGDFR.W                            | 2 | 1.87 | 0.07 | -3.62 |
| IPI00027377 | aggrecan isoform 2 precursor                   | R.VRVNSAYQDK.V                         | 2 | 2.45 | 0.25 | -3.00 |
| IPI00027377 | aggrecan isoform 2 precursor                   | R.YQCTEGFVQR.H                         | 2 | 2.53 | 0.23 | -1.45 |
| IPI00027377 | aggrecan isoform 2 precursor                   | R.YTLDFDR.A                            | 2 | 2.30 | 0.11 | -2.79 |
| IPI00027429 | Putative uncharacterized protein DKFZp547J2313 | K.LTNSQNFDEYM*K.A                      | 2 | 4.00 | 0.37 | -3.50 |
| IPI00027438 | Flotillin-1                                    | K.KAEAFQLYQEAQLDMLLEK.L                | 3 | 4.54 | 0.36 | -3.68 |
| IPI00027444 | Leukocyte elastase inhibitor                   | K.ADLSGM*SGAR.D                        | 2 | 2.75 | 0.34 | -1.69 |
| IPI00027444 | Leukocyte elastase inhibitor                   | K.FAYGYIEDLK.C                         | 2 | 2.48 | 0.19 | -1.95 |
| IPI00027457 | C1q-related factor precursor                   | K.FDDVVTNLGNNDYDAASGK.F                | 2 | 4.75 | 0.55 | -0.92 |
| IPI00027462 | Protein S100-A9                                | K.LGHPTLNQGEFK.E                       | 3 | 2.62 | 0.14 | -1.96 |
| IPI00027462 | Protein S100-A9                                | K.QLSFEEFIM*LMAR.L                     | 2 | 3.39 | 0.17 | -3.25 |
| IPI00027462 | Protein S100-A9                                | K.QLSFEEFIMLMAR.L                      | 2 | 4.12 | 0.41 | -5.56 |
| IPI00027462 | Protein S100-A9                                | K.QLSFEEFIMLMAR.L                      | 3 | 3.32 | 0.06 | -1.65 |
| IPI00027462 | Protein S100-A9                                | K.VIEHIMEDLDTNADK.Q                    | 2 | 4.24 | 0.39 | -3.40 |
| IPI00027462 | Protein S100-A9                                | K.VIEHIMEDLDTNADK.Q                    | 3 | 3.58 | 0.23 | -3.01 |
| IPI00027462 | Protein S100-A9                                | K.VIEHIMEDLDTNADKQLSFEEFIMLMAR.L       | 3 | 7.43 | 0.49 | -4.99 |
| IPI00027462 | Protein S100-A9                                | R.NIETIINTFHQYSVK.L                    | 2 | 3.11 | 0.27 | -4.84 |
| IPI00027463 | Protein S100-A6                                | K.LQDAEIAR.L                           | 2 | 2.40 | 0.14 | -3.55 |
| IPI00027463 | Protein S100-A6                                | R.LM*EDLDR.N                           | 2 | 2.19 | 0.11 | -3.25 |
| IPI00027463 | Protein S100-A6                                | R.LMEDLDRNKDQEVNFQEYVTLGALALIYNEALKG.- | 3 | 4.25 | 0.49 | -1.26 |
| IPI00027464 | Calcineurin subunit B isoform 1                | R.VIDIFDTDGNGEVDFKEFIEGVSQFSVK.G       | 3 | 4.69 | 0.46 | -3.67 |
| IPI00027466 | Carbonic anhydrase 4 precursor                 | K.ASISGGGLPAPYQAK.Q                    | 2 | 4.61 | 0.42 | -3.07 |
| IPI00027466 | Carbonic anhydrase 4 precursor                 | K.LYYDKEQTVSM*KDNVRPLQLGQR.T           | 3 | 3.67 | 0.37 | -1.41 |
| IPI00027466 | Carbonic anhydrase 4 precursor                 | K.LYYDKEQTVSM*KDNVRPLQLGQR.T           | 4 | 3.31 | 0.37 | -1.49 |
| IPI00027466 | Carbonic anhydrase 4 precursor                 | K.VVWTVFR.E                            | 2 | 1.78 | 0.21 | -1.71 |
| IPI00027466 | Carbonic anhydrase 4 precursor                 | K.VVWTVFREPIQLHR.E                     | 2 | 2.39 | 0.17 | -3.47 |
| IPI00027466 | Carbonic anhydrase 4 precursor                 | R.EQILAFSQK.L                          | 1 | 2.79 | 0.16 | -3.79 |
| IPI00027466 | Carbonic anhydrase 4 precursor                 | R.EQILAFSQK.L                          | 2 | 2.25 | 0.15 | -2.27 |
| IPI00027466 | Carbonic anhydrase 4 precursor                 | R.FFFSGYDKK.Q                          | 1 | 2.16 | 0.09 | -3.67 |
| IPI00027466 | Carbonic anhydrase 4 precursor                 | R.QSPINIVTTK.A                         | 1 | 1.71 | 0.08 | -3.36 |
| IPI00027466 | Carbonic anhydrase 4 precursor                 | R.QSPINIVTTK.A                         | 2 | 1.62 | 0.32 | -1.89 |
| IPI00027482 | Corticosteroid-binding globulin precursor      | K.AVLQLNEEGVDTAGSTGVTLNLTSKPIILR.F     | 3 | 5.74 | 0.36 |       |
| IPI00027482 | Corticosteroid-binding globulin precursor      | K.HLVALSPK.K                           | 1 | 2.55 | 0.13 |       |
| IPI00027482 | Corticosteroid-binding globulin precursor      | K.HLVALSPK.K                           | 2 | 2.67 | 0.11 |       |

|             |                                                 |                                     |   |      |      |       |
|-------------|-------------------------------------------------|-------------------------------------|---|------|------|-------|
| IPI00027482 | Corticosteroid-binding globulin precursor       | K.HYYESEVLAM*NFQDWATASR.Q           | 2 | 2.83 | 0.10 |       |
| IPI00027482 | Corticosteroid-binding globulin precursor       | K.M*NTVIAALSR.D                     | 2 | 3.57 | 0.20 |       |
| IPI00027482 | Corticosteroid-binding globulin precursor       | K.MNTVIAALSR.D                      | 2 | 3.52 | 0.17 |       |
| IPI00027482 | Corticosteroid-binding globulin precursor       | R.EENFYVDETTVVK.V                   | 2 | 2.52 | 0.20 |       |
| IPI00027482 | Corticosteroid-binding globulin precursor       | R.GLASANVDFAFSLYK.H                 | 2 | 4.08 | 0.50 |       |
| IPI00027482 | Corticosteroid-binding globulin precursor       | R.ITQDAQLK.S                        | 1 | 1.75 | 0.13 | -2.95 |
| IPI00027482 | Corticosteroid-binding globulin precursor       | R.WSAGLTSSQVDLYIPK.V                | 2 | 4.34 | 0.44 | -3.58 |
| IPI00027493 | 4F2 cell-surface antigen heavy chain            | K.ADLLLLSTQPGREEGSPLELER.L          | 2 | 3.15 | 0.26 | -3.58 |
| IPI00027493 | 4F2 cell-surface antigen heavy chain            | K.ADLLLLSTQPGREEGSPLELER.L          | 3 | 4.84 | 0.45 | -1.91 |
| IPI00027493 | 4F2 cell-surface antigen heavy chain            | K.GLVLGPIHK.N                       | 2 | 2.41 | 0.08 | -3.20 |
| IPI00027493 | 4F2 cell-surface antigen heavy chain            | K.GQSEDPGSLLSLFR.R                  | 2 | 4.01 | 0.47 | -3.09 |
| IPI00027493 | 4F2 cell-surface antigen heavy chain            | K.GRLDYLSLK.V                       | 2 | 2.72 | 0.15 | -2.40 |
| IPI00027493 | 4F2 cell-surface antigen heavy chain            | K.NQKDDVAQTDLLQIDPNFGSK.E           | 3 | 3.80 | 0.34 | -1.67 |
| IPI00027493 | 4F2 cell-surface antigen heavy chain            | K.NQKDDVAQTDLLQIDPNFGSKEDFDSLQSAK.K | 3 | 5.53 | 0.47 | -2.58 |
| IPI00027493 | 4F2 cell-surface antigen heavy chain            | K.NQKDDVAQTDLLQIDPNFGSKEDFDSLQSAK.K | 4 | 4.81 | 0.38 | -2.90 |
| IPI00027493 | 4F2 cell-surface antigen heavy chain            | R.IGDLQAFQGHGAGNLAGLK.G             | 2 | 4.52 | 0.42 | -4.10 |
| IPI00027493 | 4F2 cell-surface antigen heavy chain            | R.LKLEPHEGLLLR.F                    | 2 | 2.79 | 0.20 | -4.95 |
| IPI00027493 | 4F2 cell-surface antigen heavy chain            | R.LKLEPHEGLLLR.F                    | 3 | 2.58 | 0.31 | -3.34 |
| IPI00027493 | 4F2 cell-surface antigen heavy chain            | R.LLTSFLPAQLLR.L                    | 2 | 3.96 | 0.41 | -4.66 |
| IPI00027493 | 4F2 cell-surface antigen heavy chain            | R.LLTSFLPAQLLR.L                    | 3 | 3.92 | 0.27 | -2.82 |
| IPI00027493 | 4F2 cell-surface antigen heavy chain            | R.VILDLPNYR.G                       | 2 | 3.30 | 0.33 | -2.75 |
| IPI00027493 | 4F2 cell-surface antigen heavy chain            | R.VILDLPNYRGENSWFSTQVDTVATK.V       | 3 | 5.24 | 0.51 | -1.58 |
| IPI00027497 | Glucose-6-phosphate isomerase                   | K.DVM*PEVNK.V                       | 2 | 1.91 | 0.09 | -1.53 |
| IPI00027497 | Glucose-6-phosphate isomerase                   | K.HFVALSTNTTK.V                     | 2 | 2.71 | 0.32 | -2.32 |
| IPI00027497 | Glucose-6-phosphate isomerase                   | K.ILLANFLAQTEALM*R.G                | 2 | 4.69 | 0.45 | -4.90 |
| IPI00027497 | Glucose-6-phosphate isomerase                   | K.ILLANFLAQTEALM*R.G                | 3 | 5.33 | 0.51 | -2.61 |
| IPI00027497 | Glucose-6-phosphate isomerase                   | K.KIEPELDGSAQVTSHDASTNGLINFIK.Q     | 3 | 4.60 | 0.47 | -2.10 |
| IPI00027497 | Glucose-6-phosphate isomerase                   | K.NLVTEEDVM*R.M                     | 2 | 2.41 | 0.20 | -3.14 |
| IPI00027497 | Glucose-6-phosphate isomerase                   | K.STEEARKELQAAGK.S                  | 3 | 2.47 | 0.29 | -1.33 |
| IPI00027497 | Glucose-6-phosphate isomerase                   | K.TLAQLNPESLFIASK.T                 | 2 | 4.51 | 0.52 | -4.75 |
| IPI00027497 | Glucose-6-phosphate isomerase                   | K.TLAQLNPESLFIASK.T                 | 3 | 4.58 | 0.50 | -2.90 |
| IPI00027497 | Glucose-6-phosphate isomerase                   | K.VFEGNRPTNSIVFTK.L                 | 2 | 3.35 | 0.21 | -3.50 |
| IPI00027497 | Glucose-6-phosphate isomerase                   | K.VFEGNRPTNSIVFTK.L                 | 3 | 2.50 | 0.27 | -2.81 |
| IPI00027497 | Glucose-6-phosphate isomerase                   | R.FAAYFQQGDM*ESNGK.Y                | 2 | 4.41 | 0.53 | -4.46 |
| IPI00027497 | Glucose-6-phosphate isomerase                   | R.SNTPILVDGKDVM*PEVNK.V             | 3 | 2.72 | 0.15 | -2.81 |
| IPI00027507 | Complement factor H-related protein 3 precursor | K.CYFPYLENGYNQNYGR.K                | 2 | 4.76 | 0.43 |       |
| IPI00027507 | Complement factor H-related protein 3 precursor | K.CYFPYLENGYNQNYGR.K                | 3 | 5.71 | 0.28 |       |
| IPI00027507 | Complement factor H-related protein 3 precursor | R.KCYFPYLENGYNQNYGR.K               | 2 | 4.78 | 0.38 |       |
| IPI00027507 | Complement factor H-related protein 3 precursor | R.RPYFPVAVGK.Y                      | 1 | 1.68 | 0.07 | -2.78 |
| IPI00027507 | Complement factor H-related protein 3 precursor | R.RPYFPVAVGK.Y                      | 2 | 3.15 | 0.20 | -3.65 |
| IPI00027547 | Dermcidin precursor                             | K.ENAGEDPGLAR.Q                     | 2 | 2.99 | 0.34 | -3.84 |
| IPI00027626 | T-complex protein 1 subunit zeta                | R.AQLGVQAFADALLIIPK.V               | 2 | 3.45 | 0.27 | -2.76 |

|             |                                       |                                            |   |      |      |       |
|-------------|---------------------------------------|--------------------------------------------|---|------|------|-------|
| IPI00027685 | C-C chemokine receptor type 1         | R.AFGAQLLPPLYSLVFVIGLVGNILVVLVLVQYKR.L     | 3 | 1.05 | 0.23 | -6.44 |
| IPI00027703 | Isoform Long of Alpha-mannosidase IIx | K.DGQLEVILDRR.L                            | 2 | 2.12 | 0.07 | -2.43 |
| IPI00027703 | Isoform Long of Alpha-mannosidase IIx | K.DGQLEVILDRR.L                            | 3 | 2.49 | 0.21 | -3.50 |
| IPI00027703 | Isoform Long of Alpha-mannosidase IIx | K.GFDCGLEAK.N                              | 2 | 1.80 | 0.08 | -1.84 |
| IPI00027703 | Isoform Long of Alpha-mannosidase IIx | K.KLPLQANFYPM*PVM*AYIQDAQK.R               | 3 | 2.76 | 0.08 | -1.87 |
| IPI00027703 | Isoform Long of Alpha-mannosidase IIx | K.KLPLQANFYPM*PVM*AYIQDAQK.R.L             | 3 | 3.17 | 0.42 | -3.02 |
| IPI00027703 | Isoform Long of Alpha-mannosidase IIx | K.TFDKYYTEQTQHILNSM*VSK.L                  | 3 | 2.90 | 0.31 | -4.24 |
| IPI00027703 | Isoform Long of Alpha-mannosidase IIx | K.TFDKYYTEQTQHILNSM*VSK.L                  | 4 | 3.56 | 0.37 | -2.84 |
| IPI00027703 | Isoform Long of Alpha-mannosidase IIx | R.AALLLDQYR.K                              | 1 | 1.89 | 0.24 | -3.58 |
| IPI00027703 | Isoform Long of Alpha-mannosidase IIx | R.AALLLDQYR.K                              | 2 | 3.56 | 0.22 | -2.22 |
| IPI00027703 | Isoform Long of Alpha-mannosidase IIx | R.AALLLDQYR.K                              | 2 | 2.27 | 0.16 | -3.35 |
| IPI00027703 | Isoform Long of Alpha-mannosidase IIx | R.FSM*VSLLVNSPR.V                          | 2 | 3.32 | 0.38 | -3.44 |
| IPI00027703 | Isoform Long of Alpha-mannosidase IIx | R.FVVLFNPLEQER.F                           | 2 | 4.74 | 0.39 | -4.94 |
| IPI00027703 | Isoform Long of Alpha-mannosidase IIx | R.GAEVLYSLAAAHAR.R                         | 2 | 3.43 | 0.32 | -3.21 |
| IPI00027703 | Isoform Long of Alpha-mannosidase IIx | R.GAEVLYSLAAAHAR.R                         | 3 | 4.17 | 0.51 | -2.63 |
| IPI00027703 | Isoform Long of Alpha-mannosidase IIx | R.GLGQGLKDNKR.T                            | 2 | 3.55 | 0.16 | -3.38 |
| IPI00027703 | Isoform Long of Alpha-mannosidase IIx | R.HEAFPLR.V                                | 2 | 2.29 | 0.15 | -4.08 |
| IPI00027703 | Isoform Long of Alpha-mannosidase IIx | R.IEQLEQLLEENHEIISHIK.D                    | 3 | 3.65 | 0.30 | -4.24 |
| IPI00027703 | Isoform Long of Alpha-mannosidase IIx | R.LSHDALPER.T                              | 1 | 2.08 | 0.08 | -4.40 |
| IPI00027703 | Isoform Long of Alpha-mannosidase IIx | R.LSHDALPER.T                              | 2 | 2.19 | 0.16 | -2.45 |
| IPI00027703 | Isoform Long of Alpha-mannosidase IIx | R.LTLHTAQALGVSSLK.D                        | 2 | 3.19 | 0.43 | -3.21 |
| IPI00027703 | Isoform Long of Alpha-mannosidase IIx | R.PSFFSISPQDCQFALGGR.G                     | 2 | 5.80 | 0.56 | -3.55 |
| IPI00027703 | Isoform Long of Alpha-mannosidase IIx | R.QTWDSDSSTDIFCHM*M*PFYSYDVPHTCGPDPK.I     | 4 | 3.52 | 0.35 | -1.96 |
| IPI00027703 | Isoform Long of Alpha-mannosidase IIx | R.RSGLAGRYPLSDFTLLTEAR.R                   | 3 | 3.42 | 0.40 | -3.73 |
| IPI00027703 | Isoform Long of Alpha-mannosidase IIx | R.SGLAGRYPLSDFTLLTEAR.R                    | 2 | 3.56 | 0.41 | -3.26 |
| IPI00027703 | Isoform Long of Alpha-mannosidase IIx | R.SGLAGRYPLSDFTLLTEAR.R                    | 3 | 4.09 | 0.22 | -1.82 |
| IPI00027703 | Isoform Long of Alpha-mannosidase IIx | R.SGLAGRYPLSDFTLLTEARR.T                   | 4 | 2.23 | 0.26 | -2.66 |
| IPI00027703 | Isoform Long of Alpha-mannosidase IIx | R.SNVLLVPLGDDFR.Y                          | 2 | 3.18 | 0.30 | -6.33 |
| IPI00027703 | Isoform Long of Alpha-mannosidase IIx | R.SQISVLQNR.I                              | 2 | 3.04 | 0.08 | -0.46 |
| IPI00027703 | Isoform Long of Alpha-mannosidase IIx | R.TLGLFQHHDAITGTAK.E                       | 2 | 4.54 | 0.48 | -3.17 |
| IPI00027703 | Isoform Long of Alpha-mannosidase IIx | R.TLQAEEDTLPSAETALILHR.K                   | 2 | 5.29 | 0.50 | -2.95 |
| IPI00027703 | Isoform Long of Alpha-mannosidase IIx | R.TLQAEEDTLPSAETALILHR.K                   | 3 | 3.70 | 0.32 | -3.35 |
| IPI00027703 | Isoform Long of Alpha-mannosidase IIx | R.TVGSEVQDSHSTSYPSLLSHLTSM*YLNAPALALPVAR.M | 3 | 4.34 | 0.41 | -1.52 |
| IPI00027703 | Isoform Long of Alpha-mannosidase IIx | R.TVGSEVQDSHSTSYPSLLSHLTSM*YLNAPALALPVAR.M | 4 | 3.62 | 0.33 | -3.11 |
| IPI00027703 | Isoform Long of Alpha-mannosidase IIx | R.TVIQLDSSPR.F                             | 1 | 2.15 | 0.17 | -2.64 |
| IPI00027703 | Isoform Long of Alpha-mannosidase IIx | R.TVIQLDSSPR.F                             | 2 | 2.52 | 0.07 | -1.46 |
| IPI00027703 | Isoform Long of Alpha-mannosidase IIx | R.VIDSGTSDFALSNR.Y                         | 2 | 4.48 | 0.49 | -4.73 |
| IPI00027703 | Isoform Long of Alpha-mannosidase IIx | R.VIDSGTSDFALSNR.Y                         | 3 | 2.23 | 0.14 | -2.00 |
| IPI00027703 | Isoform Long of Alpha-mannosidase IIx | R.VLEAHLR.G                                | 2 | 2.08 | 0.15 | -1.37 |
| IPI00027703 | Isoform Long of Alpha-mannosidase IIx | R.YM*QVWFSGLTGLLK.S                        | 2 | 4.16 | 0.34 | -8.28 |
| IPI00027703 | Isoform Long of Alpha-mannosidase IIx | R.YPLSDFTLLTEAR.R                          | 2 | 4.02 | 0.39 | -4.06 |

|             |                                                                           |                                      |   |      |      |       |
|-------------|---------------------------------------------------------------------------|--------------------------------------|---|------|------|-------|
| IPI00027721 | Isoform 1 of Alpha-type platelet-derived growth factor receptor precursor | K.FQTIPFNVYALK.A                     | 2 | 2.58 | 0.12 | -3.26 |
| IPI00027721 | Isoform 1 of Alpha-type platelet-derived growth factor receptor precursor | K.GFIEIKPTFSQLEAVNLHEVK.H            | 3 | 2.92 | 0.13 | -3.27 |
| IPI00027721 | Isoform 1 of Alpha-type platelet-derived growth factor receptor precursor | K.HFVVEVR.A                          | 2 | 1.79 | 0.10 | -4.09 |
| IPI00027721 | Isoform 1 of Alpha-type platelet-derived growth factor receptor precursor | K.LVYTLTVPEATVK.D                    | 2 | 2.87 | 0.30 | -2.51 |
| IPI00027721 | Isoform 1 of Alpha-type platelet-derived growth factor receptor precursor | R.TTDPETPVLHNSEGVVPASYDSR.Q          | 3 | 3.58 | 0.25 | -3.08 |
| IPI00027726 | Isoform 1 of Krueppel-like factor 3                                       | K.FFQTPEGLSHGIQM*EPVDLTVNK.R         | 3 | 3.36 | 0.26 | 2.43  |
| IPI00027744 | Isoform 1 of Mineralocorticoid receptor                                   | K.GNPTVNPFFMDGSYFSFMDDK.D            | 3 | 3.13 | 0.16 |       |
| IPI00027780 | 72 kDa type IV collagenase precursor                                      | A.APSPIIKFPGDVAPK.T                  | 2 | 3.18 | 0.45 | -2.82 |
| IPI00027780 | 72 kDa type IV collagenase precursor                                      | C.ATTANYDDDRK.W                      | 2 | 3.24 | 0.39 | -3.20 |
| IPI00027780 | 72 kDa type IV collagenase precursor                                      | D.PETVDDAFAR.A                       | 2 | 3.05 | 0.41 | -1.21 |
| IPI00027780 | 72 kDa type IV collagenase precursor                                      | K.AVFFAGNEYWIYSASTLER.G              | 3 | 3.33 | 0.08 | -3.29 |
| IPI00027780 | 72 kDa type IV collagenase precursor                                      | K.ESCNLFVLK.D                        | 2 | 1.83 | 0.12 | -1.56 |
| IPI00027780 | 72 kDa type IV collagenase precursor                                      | K.FFGLPQTGDLQNTIETM*R.K              | 2 | 5.12 | 0.63 | -5.38 |
| IPI00027780 | 72 kDa type IV collagenase precursor                                      | K.FFGLPQTGDLQNTIETM*R.K              | 3 | 3.65 | 0.43 | -2.30 |
| IPI00027780 | 72 kDa type IV collagenase precursor                                      | K.GAYYLKLENQSLK.S                    | 2 | 4.07 | 0.28 | -4.23 |
| IPI00027780 | 72 kDa type IV collagenase precursor                                      | K.IDAVYEAPQEEK.A                     | 2 | 3.97 | 0.42 | -2.24 |
| IPI00027780 | 72 kDa type IV collagenase precursor                                      | K.LSQDDIK.G                          | 2 | 2.28 | 0.06 | -2.47 |
| IPI00027780 | 72 kDa type IV collagenase precursor                                      | K.M*DPGFPK.L                         | 1 | 1.42 | 0.08 | -2.52 |
| IPI00027780 | 72 kDa type IV collagenase precursor                                      | K.QDIVFDGIAQIR.G                     | 2 | 4.37 | 0.37 | -3.27 |
| IPI00027780 | 72 kDa type IV collagenase precursor                                      | K.TYIFAGDK.F                         | 1 | 2.21 | 0.30 | -2.06 |
| IPI00027780 | 72 kDa type IV collagenase precursor                                      | K.TYIFAGDK.F                         | 2 | 2.23 | 0.06 | -2.43 |
| IPI00027780 | 72 kDa type IV collagenase precursor                                      | R.AFQVWSDVTPLR.F                     | 2 | 3.81 | 0.42 | -4.47 |
| IPI00027780 | 72 kDa type IV collagenase precursor                                      | R.CGNPDVANYNFFPR.K                   | 2 | 3.85 | 0.37 | -2.13 |
| IPI00027780 | 72 kDa type IV collagenase precursor                                      | R.DKPM*GPLLVATFWPELPEK.I             | 3 | 3.66 | 0.22 | -3.09 |
| IPI00027780 | 72 kDa type IV collagenase precursor                                      | R.DKPM*GPLLVATFWPELPEKIDAVYEAPQEEK.A | 3 | 6.43 | 0.53 | -4.02 |
| IPI00027780 | 72 kDa type IV collagenase precursor                                      | R.DKPM*GPLLVATFWPELPEKIDAVYEAPQEEK.A | 4 | 4.23 | 0.33 | -2.76 |
| IPI00027780 | 72 kDa type IV collagenase precursor                                      | R.GEIFFKDR.F                         | 2 | 2.94 | 0.25 | -3.78 |
| IPI00027780 | 72 kDa type IV collagenase precursor                                      | R.GYPKPLTSLGLPPDVQR.V                | 2 | 3.42 | 0.44 | -4.02 |
| IPI00027780 | 72 kDa type IV collagenase precursor                                      | R.IHDGEADIM*INFGR.W                  | 2 | 4.22 | 0.44 | -0.97 |
| IPI00027780 | 72 kDa type IV collagenase precursor                                      | R.IHDGEADIM*INFGR.W                  | 3 | 4.44 | 0.32 | -0.87 |
| IPI00027780 | 72 kDa type IV collagenase precursor                                      | R.IIGYTPDLDPETVDDAFAR.A              | 2 | 5.67 | 0.56 | -4.48 |
| IPI00027780 | 72 kDa type IV collagenase precursor                                      | R.IIGYTPDLDPETVDDAFAR.A              | 3 | 4.66 | 0.43 | -4.95 |
| IPI00027780 | 72 kDa type IV collagenase precursor                                      | R.SDGFLWCSTTYNFEK.D                  | 2 | 4.94 | 0.47 | -3.82 |
| IPI00027780 | 72 kDa type IV collagenase precursor                                      | R.SDGFLWCSTTYNFEKDGK.Y               | 3 | 2.95 | 0.26 | -1.82 |
| IPI00027780 | 72 kDa type IV collagenase precursor                                      | R.VDAAFNWSK.N                        | 2 | 2.39 | 0.30 | -2.59 |
| IPI00027782 | Stromelysin-1 precursor                                                   | R.GEDTSM*NLVQK.Y                     | 2 | 3.41 | 0.32 | -2.99 |

|             |                                                                    |                                 |   |      |      |       |
|-------------|--------------------------------------------------------------------|---------------------------------|---|------|------|-------|
| IPI00027806 | Cysteine-rich secretory protein LCCL domain-containing 1 precursor | K.YM*DEEDGEWWIAK.Q              | 2 | 4.36 | 0.50 | -3.27 |
| IPI00027827 | Extracellular superoxide dismutase [Cu-Zn] precursor               | A.CCVVGVCGPGLWER.Q              | 2 | 4.69 | 0.50 | -2.22 |
| IPI00027827 | Extracellular superoxide dismutase [Cu-Zn] precursor               | A.GLAASLAGPHSIVGR.A             | 2 | 3.08 | 0.48 | -1.82 |
| IPI00027827 | Extracellular superoxide dismutase [Cu-Zn] precursor               | A.WTGEDSAEPNSDSAEWIR.D          | 2 | 4.67 | 0.40 | -3.49 |
| IPI00027827 | Extracellular superoxide dismutase [Cu-Zn] precursor               | G.RAVVVHAGEDDLGR.G              | 2 | 3.73 | 0.38 | -4.60 |
| IPI00027827 | Extracellular superoxide dismutase [Cu-Zn] precursor               | G.RAVVVHAGEDDLGR.G              | 3 | 3.69 | 0.36 | -2.12 |
| IPI00027827 | Extracellular superoxide dismutase [Cu-Zn] precursor               | K.VTEIWQEV*QR.R                 | 2 | 4.04 | 0.38 | -4.21 |
| IPI00027827 | Extracellular superoxide dismutase [Cu-Zn] precursor               | K.VTEIWQEV*QR.R                 | 3 | 4.53 | 0.32 | -2.20 |
| IPI00027827 | Extracellular superoxide dismutase [Cu-Zn] precursor               | L.AASLAGPHSIVGR.A               | 2 | 3.25 | 0.43 | -3.25 |
| IPI00027827 | Extracellular superoxide dismutase [Cu-Zn] precursor               | R.AGLAASLAGPHSIVGR.A            | 1 | 2.68 | 0.38 | -2.91 |
| IPI00027827 | Extracellular superoxide dismutase [Cu-Zn] precursor               | R.AGLAASLAGPHSIVGR.A            | 2 | 4.66 | 0.49 | -5.29 |
| IPI00027827 | Extracellular superoxide dismutase [Cu-Zn] precursor               | R.AGLAASLAGPHSIVGR.A            | 3 | 3.57 | 0.46 | -3.24 |
| IPI00027827 | Extracellular superoxide dismutase [Cu-Zn] precursor               | R.AVVVHAGEDDLGR.G               | 1 | 3.54 | 0.41 | -2.48 |
| IPI00027827 | Extracellular superoxide dismutase [Cu-Zn] precursor               | R.AVVVHAGEDDLGR.G               | 2 | 4.08 | 0.57 | -2.20 |
| IPI00027827 | Extracellular superoxide dismutase [Cu-Zn] precursor               | R.AVVVHAGEDDLGR.G               | 3 | 3.01 | 0.38 | -2.35 |
| IPI00027827 | Extracellular superoxide dismutase [Cu-Zn] precursor               | R.AVVVHAGEDDLGRGGNQASVENGNAGR.R | 3 | 4.62 | 0.55 | -3.86 |
| IPI00027827 | Extracellular superoxide dismutase [Cu-Zn] precursor               | R.AVVVHAGEDDLGRGGNQASVENGNAGR.R | 4 | 3.59 | 0.27 | -3.59 |
| IPI00027827 | Extracellular superoxide dismutase [Cu-Zn] precursor               | R.AVVVHAGEDDLGRGGNQASVENGNAGR.L | 3 | 4.41 | 0.50 | -3.85 |
| IPI00027827 | Extracellular superoxide dismutase [Cu-Zn] precursor               | R.AVVVHAGEDDLGRGGNQASVENGNAGR.L | 4 | 3.54 | 0.44 | -3.66 |
| IPI00027827 | Extracellular superoxide dismutase [Cu-Zn] precursor               | R.AVVVHAGEDDLGRGGNQASVENGNAGR.L | 5 | 2.17 | 0.18 | -0.69 |
| IPI00027827 | Extracellular superoxide dismutase [Cu-Zn] precursor               | R.DDDGALHAACQVQPSATLDAQPR.V     | 2 | 5.22 | 0.54 | -2.99 |

|             |                                                      |                                      |   |      |      |       |
|-------------|------------------------------------------------------|--------------------------------------|---|------|------|-------|
| IPI00027827 | Extracellular superoxide dismutase [Cu-Zn] precursor | R.DDDGALHAACQVQPSATLDAAQPR.V         | 3 | 4.55 | 0.42 | -2.19 |
| IPI00027827 | Extracellular superoxide dismutase [Cu-Zn] precursor | R.GGNQASVENGNAGRR.L                  | 2 | 2.20 | 0.12 | -0.63 |
| IPI00027827 | Extracellular superoxide dismutase [Cu-Zn] precursor | R.LACCVVGVCGLWER.Q                   | 2 | 4.95 | 0.42 | -1.16 |
| IPI00027827 | Extracellular superoxide dismutase [Cu-Zn] precursor | R.LACCVVGVCGLWER.Q                   | 3 | 4.19 | 0.30 | -2.36 |
| IPI00027827 | Extracellular superoxide dismutase [Cu-Zn] precursor | R.RDDGALHAACQVQPSATLDAAQPR.V         | 3 | 6.65 | 0.45 |       |
| IPI00027827 | Extracellular superoxide dismutase [Cu-Zn] precursor | R.VTGVVLF.R.Q                        | 1 | 2.20 | 0.24 | -3.87 |
| IPI00027827 | Extracellular superoxide dismutase [Cu-Zn] precursor | R.VTGVVLF.R.Q                        | 2 | 3.11 | 0.27 | -4.49 |
| IPI00027827 | Extracellular superoxide dismutase [Cu-Zn] precursor | R.YRAGLAASLAGPHSIVGR.A               | 2 | 3.32 | 0.31 | -4.01 |
| IPI00027827 | Extracellular superoxide dismutase [Cu-Zn] precursor | R.YRAGLAASLAGPHSIVGR.A               | 3 | 3.01 | 0.31 | -3.60 |
| IPI00027827 | Extracellular superoxide dismutase [Cu-Zn] precursor | V.VHAGEDDLGR.G                       | 2 | 3.04 | 0.47 | -1.05 |
| IPI00027834 | heterogeneous nuclear ribonucleoprotein L isoform a  | R.IQHPSNVLHFFNAPLEVTEENFFEICDELGVK.R | 3 | 3.38 | 0.27 | -1.00 |
| IPI00027847 | Lipoprotein lipase precursor                         | R.DFIDIESK.F                         | 1 | 2.34 | 0.15 | -3.99 |
| IPI00027847 | Lipoprotein lipase precursor                         | R.ITGLDPAGPNFEYAEAPSR.L              | 2 | 3.45 | 0.34 | -4.13 |
| IPI00027848 | Macrophage mannose receptor 1 precursor              | K.DYQYYFSK.E                         | 2 | 2.27 | 0.22 | -1.82 |
| IPI00027848 | Macrophage mannose receptor 1 precursor              | K.EGWNFYSNK.C                        | 2 | 2.39 | 0.32 | -3.29 |
| IPI00027848 | Macrophage mannose receptor 1 precursor              | K.FAWM*DGSK.V                        | 2 | 1.82 | 0.16 | -2.51 |
| IPI00027848 | Macrophage mannose receptor 1 precursor              | K.FEGSESLWNKDPLTSVSYQINSK.S          | 3 | 3.49 | 0.26 | -4.04 |
| IPI00027848 | Macrophage mannose receptor 1 precursor              | K.GDPTM*SWNDINCEHLNNWICQIQK.G        | 3 | 3.43 | 0.35 | -4.18 |
| IPI00027848 | Macrophage mannose receptor 1 precursor              | K.IQM*YFEWSDGTPVTFK.W                | 2 | 5.46 | 0.63 | -3.99 |
| IPI00027848 | Macrophage mannose receptor 1 precursor              | K.WM*DDTCDK.R                        | 2 | 2.15 | 0.07 | -2.12 |
| IPI00027848 | Macrophage mannose receptor 1 precursor              | K.YFWTGLSDIQTK.G                     | 2 | 4.26 | 0.53 | -3.78 |
| IPI00027848 | Macrophage mannose receptor 1 precursor              | R.DALTTCR.K                          | 2 | 1.96 | 0.11 | -2.86 |
| IPI00027848 | Macrophage mannose receptor 1 precursor              | R.LITASGSYHK.L                       | 2 | 2.41 | 0.11 | -1.90 |
| IPI00027848 | Macrophage mannose receptor 1 precursor              | R.M*GSSLVSIESAAESSFLSYR.V            | 2 | 5.84 | 0.53 | -3.81 |
| IPI00027848 | Macrophage mannose receptor 1 precursor              | R.M*GSSLVSIESAAESSFLSYR.V            | 3 | 5.17 | 0.34 | -3.38 |
| IPI00027848 | Macrophage mannose receptor 1 precursor              | R.NFGDLVSIQSESEKK.F                  | 2 | 3.73 | 0.30 | -0.93 |
| IPI00027848 | Macrophage mannose receptor 1 precursor              | R.QFLIYNEDHKR.C                      | 2 | 2.93 | 0.28 | -3.35 |
| IPI00027848 | Macrophage mannose receptor 1 precursor              | R.SQGPEIVEVEK.G                      | 2 | 2.95 | 0.20 | -2.09 |
| IPI00027848 | Macrophage mannose receptor 1 precursor              | R.TGIAGGLWDVVK.C                     | 2 | 3.49 | 0.36 | -3.21 |
| IPI00027848 | Macrophage mannose receptor 1 precursor              | R.YTNWAADEPK.L                       | 2 | 2.64 | 0.27 | -3.54 |
| IPI00027851 | Beta-hexosaminidase alpha chain precursor            | K.DFYVVEPLAFEGTPEQK.A                | 2 | 4.59 | 0.50 | -4.21 |

|             |                                                                                    |                                    |   |      |      |       |
|-------------|------------------------------------------------------------------------------------|------------------------------------|---|------|------|-------|
| IPI00027851 | Beta-hexosaminidase alpha chain precursor                                          | K.DFYVVEPLAFEGTPEQK.A              | 3 | 4.33 | 0.48 | -1.59 |
| IPI00027851 | Beta-hexosaminidase alpha chain precursor                                          | K.EVIEYAR.L                        | 1 | 1.82 | 0.11 | -3.23 |
| IPI00027851 | Beta-hexosaminidase alpha chain precursor                                          | K.EVIEYAR.L                        | 2 | 1.96 | 0.19 | -3.16 |
| IPI00027851 | Beta-hexosaminidase alpha chain precursor                                          | K.GSYNPVTHIYTAQDVK.E               | 2 | 4.46 | 0.53 | -3.24 |
| IPI00027851 | Beta-hexosaminidase alpha chain precursor                                          | K.GSYNPVTHIYTAQDVK.E               | 3 | 4.15 | 0.41 | -2.77 |
| IPI00027851 | Beta-hexosaminidase alpha chain precursor                                          | K.GSYNPVTHIYTAQDVKEVIEYAR.L        | 3 | 3.80 | 0.44 | -3.43 |
| IPI00027851 | Beta-hexosaminidase alpha chain precursor                                          | K.GSYNPVTHIYTAQDVKEVIEYAR.L        | 4 | 3.08 | 0.13 | -3.82 |
| IPI00027851 | Beta-hexosaminidase alpha chain precursor                                          | K.GYVWVQEVFDNK.V                   | 2 | 4.12 | 0.43 | -3.97 |
| IPI00027851 | Beta-hexosaminidase alpha chain precursor                                          | K.GYVWVQEVFDNKVK.I                 | 2 | 4.03 | 0.36 | -3.12 |
| IPI00027851 | Beta-hexosaminidase alpha chain precursor                                          | K.GYVWVQEVFDNKVK.I                 | 3 | 1.67 | 0.23 | -2.19 |
| IPI00027851 | Beta-hexosaminidase alpha chain precursor                                          | K.IQPDTIIQVWREDIPVNYM*K.E          | 2 | 3.44 | 0.36 | -2.43 |
| IPI00027851 | Beta-hexosaminidase alpha chain precursor                                          | K.IQPDTIIQVWREDIPVNYM*K.E          | 3 | 1.82 | 0.11 | -3.82 |
| IPI00027851 | Beta-hexosaminidase alpha chain precursor                                          | K.LTSDLTFAYER.L                    | 2 | 3.63 | 0.24 | -4.71 |
| IPI00027851 | Beta-hexosaminidase alpha chain precursor                                          | K.QLESFYIQTLLDIVSSYGK.G            | 2 | 5.77 | 0.56 | -1.43 |
| IPI00027851 | Beta-hexosaminidase alpha chain precursor                                          | K.QLESFYIQTLLDIVSSYGK.G            | 3 | 3.81 | 0.36 | -2.38 |
| IPI00027851 | Beta-hexosaminidase alpha chain precursor                                          | K.SNPEIQDFM*R.K                    | 1 | 1.36 | 0.26 | -2.94 |
| IPI00027851 | Beta-hexosaminidase alpha chain precursor                                          | K.SNPEIQDFM*R.K                    | 2 | 3.08 | 0.45 | -3.24 |
| IPI00027851 | Beta-hexosaminidase alpha chain precursor                                          | R.ALLSAPWYLN.R.I                   | 2 | 3.39 | 0.39 | -2.39 |
| IPI00027851 | Beta-hexosaminidase alpha chain precursor                                          | R.GLETFSQLVWK.S                    | 2 | 2.88 | 0.21 | -2.38 |
| IPI00027851 | Beta-hexosaminidase alpha chain precursor                                          | R.HYLPLSSILDLDVM*AYNK.L            | 2 | 2.60 | 0.23 | -4.22 |
| IPI00027851 | Beta-hexosaminidase alpha chain precursor                                          | R.HYLPLSSILDLDVM*AYNK.L            | 3 | 3.68 | 0.41 | -3.76 |
| IPI00027851 | Beta-hexosaminidase alpha chain precursor                                          | R.ISYGPDWKDFYVVEPLAFEGTPEQK.A      | 3 | 4.47 | 0.34 | -4.38 |
| IPI00027851 | Beta-hexosaminidase alpha chain precursor                                          | R.KGSYNPVTHIYTAQDVK.E              | 2 | 4.14 | 0.50 | -4.10 |
| IPI00027851 | Beta-hexosaminidase alpha chain precursor                                          | R.YVLYPNFQFQYDVSSAAQPGCSVLDEAFQR.Y | 3 | 4.01 | 0.29 | -5.96 |
| IPI00027875 | Synaptotagmin-11                                                                   | R.NLLVDAAEAGLLSR.D                 | 2 | 4.91 | 0.40 | -3.28 |
| IPI00027898 | Isoform A of Uncharacterized protein C21orf70                                      | K.M*KLRREQWLQKIEAIKLAEQK.H         | 3 | 3.51 | 0.12 |       |
| IPI00027972 | Isoform 1 of Leukocyte immunoglobulin-like receptor subfamily A member 2 precursor | R.SEHQAAQQNAEFR.M                  | 2 | 4.15 | 0.42 | -2.74 |
| IPI00027972 | Isoform 1 of Leukocyte immunoglobulin-like receptor subfamily A member 2 precursor | R.SEHQAAQQNAEFR.M                  | 3 | 3.16 | 0.24 | -1.90 |
| IPI00027972 | Isoform 1 of Leukocyte immunoglobulin-like receptor subfamily A member 2 precursor | W.AEPGSVIIQGSPVTLR.C               | 2 | 4.30 | 0.51 | -3.14 |
| IPI00027984 | Putative uncharacterized protein                                                   | R.TPSTAWTSAAVK.L                   | 2 | 2.48 | 0.19 |       |
| IPI00028015 | Isoform 2 of Leukocyte-associated immunoglobulin-like receptor 1 precursor         | K.WSEQSDYLELLVK.G                  | 2 | 4.69 | 0.43 | -3.84 |
| IPI00028015 | Isoform 2 of Leukocyte-associated immunoglobulin-like receptor 1 precursor         | R.FRIDSVSEGNAGPYR.C                | 2 | 3.84 | 0.33 | -3.41 |
| IPI00028015 | Isoform 2 of Leukocyte-associated immunoglobulin-like receptor 1 precursor         | R.FRIDSVSEGNAGPYR.C                | 3 | 3.56 | 0.22 | -3.29 |
| IPI00028015 | Isoform 2 of Leukocyte-associated immunoglobulin-like receptor 1 precursor         | R.IDSVSEGNAGPYR.C                  | 2 | 3.87 | 0.42 | -3.79 |
| IPI00028053 | Gap junction alpha-9 protein                                                       | K.RETEGKDSKR.N                     | 1 | 1.66 | 0.13 | -7.33 |

|             |                                                                      |                                        |   |      |      |       |
|-------------|----------------------------------------------------------------------|----------------------------------------|---|------|------|-------|
| IPI00028082 | Reversion-inducing cysteine-rich protein with Kazal motifs precursor | K.LGEASDFIVR.Q                         | 2 | 3.38 | 0.36 | -2.59 |
| IPI00028082 | Reversion-inducing cysteine-rich protein with Kazal motifs precursor | R.DVCEQIFSSK.S                         | 2 | 3.23 | 0.25 | -3.50 |
| IPI00028082 | Reversion-inducing cysteine-rich protein with Kazal motifs precursor | R.TDSSPGPSQIK.A                        | 2 | 2.79 | 0.18 | -3.15 |
| IPI00028193 | 192 kDa protein                                                      | K.DLGRQQADGALPDAQSPELEQQLM*M*EKRNYRK.T | 3 | 3.79 | 0.07 |       |
| IPI00028193 | 192 kDa protein                                                      | R.SLGATLK.Y                            | 1 | 1.68 | 0.05 | -3.46 |
| IPI00028381 | Isoform 1 of Delta-like protein 2 precursor                          | R.CLVGFVGAR.C                          | 2 | 2.76 | 0.17 | -1.64 |
| IPI00028383 | Uncharacterized protein C16orf24                                     | R.FPLPTWQPVTAVGEGLD.R.V                | 3 | 3.23 | 0.08 | 1.55  |
| IPI00028387 | Isoform 1 of Uncharacterized protein C20orf116 precursor             | R.AASAGQEPLHNEELAGAGR.V                | 3 | 2.31 | 0.13 | 0.18  |
| IPI00028387 | Isoform 1 of Uncharacterized protein C20orf116 precursor             | R.VAQPGPLEPEEPR.A                      | 2 | 2.52 | 0.38 | -1.57 |
| IPI00028413 | Isoform 1 of Inter-alpha-trypsin inhibitor heavy chain H3 precursor  | K.EHLVQATPENLQEAR.T                    | 2 | 5.37 | 0.50 | -2.88 |
| IPI00028413 | Isoform 1 of Inter-alpha-trypsin inhibitor heavy chain H3 precursor  | K.EHLVQATPENLQEAR.T                    | 3 | 3.38 | 0.30 | -2.05 |
| IPI00028413 | Isoform 1 of Inter-alpha-trypsin inhibitor heavy chain H3 precursor  | K.GM*TNINDGLLR.G                       | 2 | 3.91 | 0.37 | -2.50 |
| IPI00028413 | Isoform 1 of Inter-alpha-trypsin inhibitor heavy chain H3 precursor  | K.SM*EDKGM*TNINDGLLR.G                 | 2 | 2.77 | 0.39 | -2.47 |
| IPI00028413 | Isoform 1 of Inter-alpha-trypsin inhibitor heavy chain H3 precursor  | K.SM*EDKGM*TNINDGLLR.G                 | 3 | 3.67 | 0.24 | -1.53 |
| IPI00028413 | Isoform 1 of Inter-alpha-trypsin inhibitor heavy chain H3 precursor  | K.YHFVTPLTSM*VVTKPEDNEDER.A            | 3 | 3.43 | 0.37 | -4.97 |
| IPI00028413 | Isoform 1 of Inter-alpha-trypsin inhibitor heavy chain H3 precursor  | R.DFLGFYVVD SHR.M                      | 3 | 1.94 | 0.10 | -1.42 |
| IPI00028413 | Isoform 1 of Inter-alpha-trypsin inhibitor heavy chain H3 precursor  | R.DYIFGNYIER.L                         | 2 | 2.20 | 0.27 | -2.55 |
| IPI00028413 | Isoform 1 of Inter-alpha-trypsin inhibitor heavy chain H3 precursor  | R.ESPGNVQIVNGYFVHFFAPQGLPVVPK.N        | 3 | 5.12 | 0.54 | -3.69 |
| IPI00028413 | Isoform 1 of Inter-alpha-trypsin inhibitor heavy chain H3 precursor  | R.ESPGNVQIVNGYFVHFFAPQGLPVVPK.N        | 4 | 2.97 | 0.23 | -2.51 |
| IPI00028413 | Isoform 1 of Inter-alpha-trypsin inhibitor heavy chain H3 precursor  | R.LIQDAVTGLTVNGQITGDKR.G               | 3 | 2.85 | 0.33 | -2.42 |
| IPI00028413 | Isoform 1 of Inter-alpha-trypsin inhibitor heavy chain H3 precursor  | R.LVDEDM*NSFK.A                        | 2 | 3.58 | 0.36 | -3.31 |
| IPI00028413 | Isoform 1 of Inter-alpha-trypsin inhibitor heavy chain H3 precursor  | R.LVDEDM*NSFKADV.K                     | 2 | 3.95 | 0.40 | -2.45 |
| IPI00028413 | Isoform 1 of Inter-alpha-trypsin inhibitor heavy chain H3 precursor  | R.SLPEGVANGIEVYSTK.I                   | 2 | 4.62 | 0.52 | -3.98 |



|             |                                                                                      |                                              |   |      |      |       |
|-------------|--------------------------------------------------------------------------------------|----------------------------------------------|---|------|------|-------|
| IPI00028413 | Isoform 1 of Inter-alpha-trypsin inhibitor heavy chain H3 precursor                  | R.STSIVIM*LTDGDANVGESRPEK.I                  | 3 | 3.49 | 0.26 | -2.42 |
| IPI00028448 | Brain-specific angiogenesis inhibitor 3 precursor                                    | K.KGEEDQKSFFEFLVLNK.V                        | 3 | 4.45 | 0.39 | -3.51 |
| IPI00028448 | Brain-specific angiogenesis inhibitor 3 precursor                                    | K.NAFVFLQYDK.N                               | 1 | 1.57 | 0.20 | -1.05 |
| IPI00028448 | Brain-specific angiogenesis inhibitor 3 precursor                                    | K.NAFVFLQYDK.N                               | 2 | 3.31 | 0.38 | -3.51 |
| IPI00028448 | Brain-specific angiogenesis inhibitor 3 precursor                                    | K.RVPQEQAADAAK.F                             | 2 | 2.88 | 0.25 | -2.72 |
| IPI00028448 | Brain-specific angiogenesis inhibitor 3 precursor                                    | K.SFFEFLVLNK.V                               | 2 | 3.77 | 0.21 | -2.86 |
| IPI00028448 | Brain-specific angiogenesis inhibitor 3 precursor                                    | R.RVFPTNFPGLQK.K                             | 2 | 3.33 | 0.22 | -1.97 |
| IPI00028448 | Brain-specific angiogenesis inhibitor 3 precursor                                    | R.TESCGIM*YTK.C                              | 2 | 2.30 | 0.32 | -3.51 |
| IPI00028448 | Brain-specific angiogenesis inhibitor 3 precursor                                    | R.VFPTNFPGLQK.K                              | 2 | 2.28 | 0.31 | -2.53 |
| IPI00028450 | Isoform 1 of Sodium/calcium exchanger 1 precursor                                    | R.VGIIDDDIFEEDENFLVHLSNVK.V                  | 3 | 3.00 | 0.19 | -4.44 |
| IPI00028481 | Ras-related protein Rab-8A                                                           | R.NIEEHASADVEK.M                             | 2 | 2.94 | 0.25 | -3.56 |
| IPI00028520 | Isoform 1 of NADH dehydrogenase [ubiquinone] flavoprotein 1, mitochondrial precursor | K.SVCETVLMDFDALVQAQTGLGTAIVMDR.S             | 3 | 3.43 | 0.40 | -1.58 |
| IPI00028553 | Isoform 2 of Multiple inositol polyphosphate phosphatase 1 precursor                 | C.SLLEPRDPVASSLSPYFGTK.T                     | 3 | 4.36 | 0.28 | -1.91 |
| IPI00028553 | Isoform 2 of Multiple inositol polyphosphate phosphatase 1 precursor                 | K.TGPEM*QNILK.K                              | 2 | 2.87 | 0.17 | -0.45 |
| IPI00028553 | Isoform 2 of Multiple inositol polyphosphate phosphatase 1 precursor                 | K.TGPEM*QNILKK.V                             | 3 | 2.70 | 0.20 | -3.66 |
| IPI00028553 | Isoform 2 of Multiple inositol polyphosphate phosphatase 1 precursor                 | R.CM*DSSAAFLQGLWQHYHPGLPPPDVADM*EFGPPTVNDK.L | 4 | 4.55 | 0.29 | -2.05 |
| IPI00028553 | Isoform 2 of Multiple inositol polyphosphate phosphatase 1 precursor                 | R.DPVASSLSPYFGTK.T                           | 2 | 4.34 | 0.38 | -5.10 |
| IPI00028553 | Isoform 2 of Multiple inositol polyphosphate phosphatase 1 precursor                 | R.LASLFPALFSR.E                              | 1 | 2.01 | 0.21 | -3.33 |
| IPI00028553 | Isoform 2 of Multiple inositol polyphosphate phosphatase 1 precursor                 | R.LASLFPALFSR.E                              | 2 | 2.98 | 0.24 | -2.78 |
| IPI00028561 | Kinesin heavy chain isoform 5C                                                       | K.SEVKS LVNR.S                               | 2 | 2.71 | 0.07 |       |
| IPI00028600 | Isoform 1 of Kallikrein-7 precursor                                                  | K.M*NEYTVHLGSDTLGDRR.A                       | 3 | 3.02 | 0.12 | -3.40 |
| IPI00028601 | Putative metallothionein C20orf127                                                   | K.KSCCSCCPM*GCAKCAQGCVCCKGACSCCV.-           | 3 | 1.64 | 0.12 | 2.11  |
| IPI00028614 | erythrocyte membrane protein band 4.2 isoform 2                                      | K.AEQYQPLTASVSLQNSLDAPMEDCVISILGR.G          | 3 | 4.85 | 0.46 | -2.77 |
| IPI00028614 | erythrocyte membrane protein band 4.2 isoform 2                                      | K.EGTLGLTPAVSDLFAAINASCVVWK.C                | 2 | 5.27 | 0.60 | -4.43 |
| IPI00028614 | erythrocyte membrane protein band 4.2 isoform 2                                      | K.EGTLGLTPAVSDLFAAINASCVVWK.C                | 3 | 5.46 | 0.50 | -5.05 |
| IPI00028614 | erythrocyte membrane protein band 4.2 isoform 2                                      | L.IYLG TADCIQAESWDFGQFEGDVIDLSLR.L           | 3 | 5.00 | 0.45 | -5.32 |
| IPI00028614 | erythrocyte membrane protein band 4.2 isoform 2                                      | R.GRPVYDGGQAVVLA AVACTVLR.C                  | 2 | 4.34 | 0.43 | -4.51 |
| IPI00028614 | erythrocyte membrane protein band 4.2 isoform 2                                      | R.GRPVYDGGQAVVLA AVACTVLR.C                  | 3 | 2.85 | 0.23 | -5.57 |
| IPI00028614 | erythrocyte membrane protein band 4.2 isoform 2                                      | R.LTAMATHSESNLSCFAQEDIAICR.P                 | 3 | 3.53 | 0.31 | -2.75 |
| IPI00028614 | erythrocyte membrane protein band 4.2 isoform 2                                      | R.LTVEVDCNMFQNL TNYS.S                       | 2 | 5.22 | 0.46 | -4.65 |
| IPI00028614 | erythrocyte membrane protein band 4.2 isoform 2                                      | R.MEYLLNQNGLIYLG TADCIQAESWDFGQFEGDVIDLSLR.L | 3 | 5.80 | 0.60 | -4.22 |
| IPI00028614 | erythrocyte membrane protein band 4.2 isoform 2                                      | R.MEYLLNQNGLIYLG TADCIQAESWDFGQFEGDVIDLSLR.L | 4 | 3.47 | 0.19 | -1.94 |

|             |                                                 |                                              |   |      |      |       |
|-------------|-------------------------------------------------|----------------------------------------------|---|------|------|-------|
| IPI00028614 | erythrocyte membrane protein band 4.2 isoform 2 | R.PVYDGQAWVLAAVACTVLR.C                      | 2 | 5.16 | 0.54 | -4.18 |
| IPI00028714 | Matrix Gla protein precursor                    | R.NANTFISPQQR.W                              | 2 | 3.53 | 0.34 | -2.31 |
| IPI00028786 | Isoform 3 of Polycystin-1 precursor             | R.IPADATALDVSHNLLR.A                         | 3 | 3.29 | 0.35 | 0.91  |
| IPI00028908 | Nidogen-2 precursor                             | K.EGTSLSGEVGGPDLK.G                          | 2 | 3.11 | 0.25 | -3.10 |
| IPI00028908 | Nidogen-2 precursor                             | K.LANPLHFYEAR.F                              | 2 | 2.76 | 0.42 | -4.08 |
| IPI00028908 | Nidogen-2 precursor                             | K.VLFYTDLVNPR.A                              | 2 | 2.89 | 0.35 | -3.02 |
| IPI00028908 | Nidogen-2 precursor                             | R.AGLELGAEPETIVNSGLISPEGLAIDHIR.R            | 3 | 4.52 | 0.38 | -4.61 |
| IPI00028908 | Nidogen-2 precursor                             | R.DGVSVNKH.H                                 | 2 | 2.37 | 0.17 | -2.74 |
| IPI00028908 | Nidogen-2 precursor                             | R.EDTSPAVLGLAAR.Y                            | 2 | 3.88 | 0.30 | -1.20 |
| IPI00028908 | Nidogen-2 precursor                             | R.ETQYVDYDFPTDFPAIAPFLADIDTSHGR.G            | 3 | 6.35 | 0.56 | -7.40 |
| IPI00028908 | Nidogen-2 precursor                             | R.FSNLYVGTNGIISTQDFPR.E                      | 2 | 6.02 | 0.60 | -5.49 |
| IPI00028908 | Nidogen-2 precursor                             | R.FSNLYVGTNGIISTQDFPR.E                      | 3 | 4.51 | 0.39 | -3.87 |
| IPI00028908 | Nidogen-2 precursor                             | R.FTPTHAFLATWEQVGAYEEVKR.G                   | 3 | 2.99 | 0.32 | -4.59 |
| IPI00028908 | Nidogen-2 precursor                             | R.GALPSGELNTFQAVLASDGSYSALFLYPANGLQFLGTRPK.E | 3 | 6.36 | 0.61 | -4.84 |
| IPI00028908 | Nidogen-2 precursor                             | R.GALPSGELNTFQAVLASDGSYSALFLYPANGLQFLGTRPK.E | 4 | 4.97 | 0.43 | -4.93 |
| IPI00028908 | Nidogen-2 precursor                             | R.GEADDLKSEGPYFSLTSTEQSVK.N                  | 2 | 5.04 | 0.52 | -1.66 |
| IPI00028908 | Nidogen-2 precursor                             | R.GNLVYTDWNR.D                               | 2 | 2.70 | 0.29 | -1.23 |
| IPI00028908 | Nidogen-2 precursor                             | R.HAQAQYAYPGAR.F                             | 2 | 3.03 | 0.32 | -3.61 |
| IPI00028908 | Nidogen-2 precursor                             | R.ILINTDIGLPNGLTFDPFSK.L                     | 2 | 4.23 | 0.52 | -2.56 |
| IPI00028908 | Nidogen-2 precursor                             | R.KVLFYTDLVNPR.A                             | 2 | 4.06 | 0.39 | -2.68 |
| IPI00028908 | Nidogen-2 precursor                             | R.KVLFYTDLVNPR.A                             | 3 | 3.32 | 0.15 | -2.40 |
| IPI00028908 | Nidogen-2 precursor                             | R.VLYREDTSPAVLGLAAR.Y                        | 2 | 4.20 | 0.43 | -3.26 |
| IPI00028908 | Nidogen-2 precursor                             | R.VLYREDTSPAVLGLAAR.Y                        | 3 | 3.48 | 0.40 | -2.68 |
| IPI00028908 | Nidogen-2 precursor                             | W.GDQLLQEGDDESSAVVK.L                        | 2 | 4.81 | 0.43 | -2.72 |
| IPI00028911 | Dystroglycan precursor                          | C.AADEPVTVLTVILDADLTK.M                      | 2 | 4.36 | 0.45 | -2.63 |
| IPI00028911 | Dystroglycan precursor                          | C.AADEPVTVLTVILDADLTK.M                      | 3 | 4.62 | 0.39 | -3.10 |
| IPI00028911 | Dystroglycan precursor                          | I.PTDLIASSGDIK.V                             | 2 | 4.32 | 0.33 | -2.37 |
| IPI00028911 | Dystroglycan precursor                          | K.GVHYISVSATR.L                              | 1 | 3.11 | 0.42 | -4.74 |
| IPI00028911 | Dystroglycan precursor                          | K.GVHYISVSATR.L                              | 2 | 3.64 | 0.44 | -3.29 |
| IPI00028911 | Dystroglycan precursor                          | K.IPSDTFYDHEDTTDKLK.L                        | 3 | 2.17 | 0.17 | -2.88 |
| IPI00028911 | Dystroglycan precursor                          | K.LGCSLNQNSVPDIHGVEAPA.R                     | 2 | 5.39 | 0.52 | -2.49 |
| IPI00028911 | Dystroglycan precursor                          | K.LGCSLNQNSVPDIHGVEAPAR.E                    | 3 | 4.70 | 0.45 | -2.66 |
| IPI00028911 | Dystroglycan precursor                          | K.LREQQLVGEK.S                               | 2 | 2.28 | 0.10 | -0.11 |
| IPI00028911 | Dystroglycan precursor                          | K.LVPVNNR.L                                  | 1 | 2.39 | 0.18 | -1.59 |
| IPI00028911 | Dystroglycan precursor                          | K.LVPVNNR.L                                  | 2 | 1.48 | 0.17 | -1.74 |
| IPI00028911 | Dystroglycan precursor                          | K.VVENGALLSWK.L                              | 1 | 1.91 | 0.09 | -3.10 |
| IPI00028911 | Dystroglycan precursor                          | K.VVENGALLSWK.L                              | 2 | 3.69 | 0.41 | -1.21 |
| IPI00028911 | Dystroglycan precursor                          | R.EGAM*SAQLGYPVVGWHIANK.K                    | 2 | 5.09 | 0.50 | -2.44 |
| IPI00028911 | Dystroglycan precursor                          | R.EGAM*SAQLGYPVVGWHIANK.K                    | 3 | 3.37 | 0.43 | -2.80 |
| IPI00028911 | Dystroglycan precursor                          | R.RIAEDDGKPRPAFSNALEPDFK.A                   | 3 | 2.58 | 0.12 | -1.47 |
| IPI00028911 | Dystroglycan precursor                          | R.RIAEDDGKPRPAFSNALEPDFK.A                   | 4 | 2.34 | 0.20 | -0.92 |
| IPI00028911 | Dystroglycan precursor                          | R.SFRVTIPTDLIASSGDIK.V                       | 2 | 2.80 | 0.23 | -3.21 |

|             |                                                          |                                     |   |      |      |       |
|-------------|----------------------------------------------------------|-------------------------------------|---|------|------|-------|
| IPI00028911 | Dystroglycan precursor                                   | R.SFRVTIPTDLIASSGDIK.V              | 3 | 2.99 | 0.12 | -0.77 |
| IPI00028911 | Dystroglycan precursor                                   | R.SFSEVELHNM*K.L                    | 1 | 2.61 | 0.18 | -3.26 |
| IPI00028911 | Dystroglycan precursor                                   | R.SFSEVELHNM*K.L                    | 2 | 3.80 | 0.37 | -2.78 |
| IPI00028911 | Dystroglycan precursor                                   | R.TASPDPEVSSA.C                     | 2 | 2.96 | 0.38 | -0.97 |
| IPI00028911 | Dystroglycan precursor                                   | R.TASPDPEVSSACAADPEVTVLTVILDADLTK.M | 3 | 4.86 | 0.40 | -3.83 |
| IPI00028911 | Dystroglycan precursor                                   | R.VTIPTDLIASSGDIK.V                 | 2 | 5.50 | 0.57 | -4.96 |
| IPI00028911 | Dystroglycan precursor                                   | R.VTIPTDLIASSGDIK.V                 | 3 | 3.77 | 0.35 | -3.34 |
| IPI00028911 | Dystroglycan precursor                                   | W.DSQSHTLEGLPLDLDKGVHYISVSATR.L     | 3 | 5.65 | 0.56 | -3.93 |
| IPI00028911 | Dystroglycan precursor                                   | W.DSQSHTLEGLPLDLDKGVHYISVSATR.L     | 4 | 5.18 | 0.46 | -2.67 |
| IPI00028912 | zinc finger protein 161                                  | K.KTPTTVVPLISTIAGDSSR.T             | 3 | 3.34 | 0.11 |       |
| IPI00028931 | Desmoglein-2 precursor                                   | K.GITEPPFGIFVFNK.D                  | 2 | 3.19 | 0.35 | -1.09 |
| IPI00028931 | Desmoglein-2 precursor                                   | K.VLEGM*VEENQVNVEVTR.I              | 2 | 2.67 | 0.05 |       |
| IPI00028931 | Desmoglein-2 precursor                                   | R.GNNVEKPLELR.I                     | 3 | 2.36 | 0.13 | -3.61 |
| IPI00028932 | Microtubule-associated serine/threonine-protein kinase 3 | K.SRASSSGGSGGGSGGR.V                | 2 | 3.12 | 0.08 |       |
| IPI00029012 | Eukaryotic translation initiation factor 3 subunit A     | K.IDYFERAKRLEEIPLIK.S               | 2 | 2.79 | 0.12 |       |
| IPI00029046 | Uncharacterized protein KIAA0152 precursor               | K.FAEVYFAQSQK.V                     | 2 | 4.18 | 0.41 | -2.78 |
| IPI00029046 | Uncharacterized protein KIAA0152 precursor               | K.FAEVYFAQSQK.V                     | 3 | 3.40 | 0.29 | -4.27 |
| IPI00029046 | Uncharacterized protein KIAA0152 precursor               | K.LSVQGEVSTFTGK.L                   | 2 | 4.50 | 0.45 | -2.78 |
| IPI00029046 | Uncharacterized protein KIAA0152 precursor               | K.LYIEFVK.G                         | 2 | 2.20 | 0.11 | -2.31 |
| IPI00029046 | Uncharacterized protein KIAA0152 precursor               | K.VCALYIM*AGTVDDVPK.L               | 2 | 4.89 | 0.46 | -2.56 |
| IPI00029046 | Uncharacterized protein KIAA0152 precursor               | R.LNGHVVK.D                         | 2 | 2.54 | 0.25 | -5.01 |
| IPI00029046 | Uncharacterized protein KIAA0152 precursor               | R.SNPEDQILYQTER.Y                   | 2 | 4.40 | 0.41 | -4.15 |
| IPI00029046 | Uncharacterized protein KIAA0152 precursor               | R.YNEETFGYEVPIKEEGDYVLVK.F          | 3 | 5.15 | 0.47 | -1.90 |
| IPI00029050 | Isoform 1 of Glycosyltransferase-like protein LARGE1     | K.SVIQLDLANTKKAMIVPAFETLRYR.L       | 2 | 1.91 | 0.25 |       |
| IPI00029050 | Isoform 1 of Glycosyltransferase-like protein LARGE1     | K.TYSM*EEGTGDSENLR.A                | 2 | 4.28 | 0.43 | -5.72 |
| IPI00029061 | Selenoprotein P precursor                                | K.DDFLIYDR.C                        | 2 | 2.95 | 0.22 | -3.42 |
| IPI00029061 | Selenoprotein P precursor                                | K.LPTDSELAPR.S                      | 1 | 2.63 | 0.29 | -2.54 |
| IPI00029061 | Selenoprotein P precursor                                | K.LPTDSELAPR.S                      | 2 | 3.57 | 0.33 | -2.62 |
| IPI00029061 | Selenoprotein P precursor                                | L.PTDSELAPR.S                       | 2 | 2.96 | 0.31 | -2.25 |
| IPI00029061 | Selenoprotein P precursor                                | M.PASEDLQDLQK.K                     | 2 | 3.21 | 0.31 | -2.28 |
| IPI00029061 | Selenoprotein P precursor                                | R.DM*PASEDLQDLQK.K                  | 2 | 4.43 | 0.42 | -2.13 |
| IPI00029061 | Selenoprotein P precursor                                | R.DM*PASEDLQDLQK.K                  | 3 | 3.80 | 0.08 | -0.70 |
| IPI00029061 | Selenoprotein P precursor                                | R.LVYHLGLPFSFLTFPYVEEAIK.I          | 3 | 3.90 | 0.13 |       |
| IPI00029107 | Werner syndrome ATP-dependent helicase                   | K.MTQQVTGELRKLNLSCGTYHAGM*SFSTR.K   | 4 | 3.17 | 0.15 | -7.84 |
| IPI00029123 | Isoform A of Endothelin B receptor precursor             | R.SLAPAEVPKGDR.T                    | 2 | 2.67 | 0.27 | -2.17 |
| IPI00029131 | Neuroendocrine convertase 2 precursor                    | K.EELEEEELDEAVER.S                  | 2 | 4.76 | 0.41 | -4.42 |
| IPI00029131 | Neuroendocrine convertase 2 precursor                    | R.DM*QHLTVLTSK.R                    | 2 | 3.11 | 0.20 | 1.10  |
| IPI00029131 | Neuroendocrine convertase 2 precursor                    | R.QVAAEHGFGVR.K                     | 2 | 1.62 | 0.34 | -2.42 |
| IPI00029168 | Apolipoprotein                                           | K.CQSWSSM*TPHR.H                    | 2 | 2.49 | 0.16 |       |

|             |                                                        |                                   |   |      |      |       |
|-------------|--------------------------------------------------------|-----------------------------------|---|------|------|-------|
| IPI00029168 | Apolipoprotein                                         | K.CQSWSSM*TPHR.H                  | 3 | 3.09 | 0.19 |       |
| IPI00029168 | Apolipoprotein                                         | R.GTYSTTVTGR.T                    | 2 | 2.73 | 0.36 | -2.13 |
| IPI00029168 | Apolipoprotein                                         | R.NPDAVAAPYCYTR.D                 | 2 | 3.07 | 0.18 |       |
| IPI00029175 | Strumpellin                                            | S.SQPGAKRPSNYPESYFQR.V            | 2 | 3.33 | 0.19 | 0.71  |
| IPI00029193 | Hepatocyte growth factor activator precursor           | K.DSALSWEYCR.L                    | 2 | 3.36 | 0.29 | -1.49 |
| IPI00029193 | Hepatocyte growth factor activator precursor           | K.YIPYTLYSVFNPSDHDLVLIR.L         | 3 | 2.34 | 0.29 | -2.78 |
| IPI00029193 | Hepatocyte growth factor activator precursor           | R.EALVPLVADHK.C                   | 2 | 2.49 | 0.07 | -3.43 |
| IPI00029193 | Hepatocyte growth factor activator precursor           | R.LEACESLTR.V                     | 2 | 2.37 | 0.21 | -2.15 |
| IPI00029193 | Hepatocyte growth factor activator precursor           | R.TTDVTQTFGIEK.Y                  | 2 | 4.16 | 0.43 | -4.59 |
| IPI00029193 | Hepatocyte growth factor activator precursor           | R.VQLSPDLLATLPEPASPGR.Q           | 2 | 5.32 | 0.48 | -3.04 |
| IPI00029193 | Hepatocyte growth factor activator precursor           | R.VQLSPDLLATLPEPASPGR.Q           | 3 | 3.17 | 0.21 | -3.19 |
| IPI00029193 | Hepatocyte growth factor activator precursor           | W.GHLDENVSGYSSSLR.E               | 2 | 4.10 | 0.57 | -4.26 |
| IPI00029235 | Insulin-like growth factor-binding protein 6 precursor | H.LDSVLQQLQTEVYR.G                | 2 | 4.43 | 0.45 | -3.90 |
| IPI00029235 | Insulin-like growth factor-binding protein 6 precursor | R.APAVAEENPK.E                    | 1 | 2.81 | 0.40 | -2.99 |
| IPI00029235 | Insulin-like growth factor-binding protein 6 precursor | R.APAVAEENPK.E                    | 2 | 3.06 | 0.43 | -1.70 |
| IPI00029235 | Insulin-like growth factor-binding protein 6 precursor | R.APAVAEENPKESKPQAGTARPQDVN.R     | 3 | 4.90 | 0.33 | -3.48 |
| IPI00029235 | Insulin-like growth factor-binding protein 6 precursor | R.APAVAEENPKESKPQAGTARPQDVNR.R    | 4 | 2.56 | 0.19 | -3.22 |
| IPI00029235 | Insulin-like growth factor-binding protein 6 precursor | R.APAVAEENPKESKPQAGTARPQDVNRR.D   | 4 | 3.29 | 0.31 | -4.40 |
| IPI00029235 | Insulin-like growth factor-binding protein 6 precursor | R.DQQRNPGTSTTPSQNSAGVQDTEM*GPCR.R | 3 | 4.68 | 0.51 | -3.92 |
| IPI00029235 | Insulin-like growth factor-binding protein 6 precursor | R.GAQTLYVPNCDHR.G                 | 2 | 3.07 | 0.32 | -1.52 |
| IPI00029235 | Insulin-like growth factor-binding protein 6 precursor | R.HLDSVLQQLQTEVYR.G               | 2 | 5.97 | 0.56 | -4.50 |
| IPI00029235 | Insulin-like growth factor-binding protein 6 precursor | R.HLDSVLQQLQTEVYR.G               | 3 | 5.47 | 0.40 | -2.81 |
| IPI00029235 | Insulin-like growth factor-binding protein 6 precursor | R.NPGTSTTPSQNSAGVQDTEM*GPCR.R     | 3 | 5.12 | 0.45 | -2.07 |
| IPI00029235 | Insulin-like growth factor-binding protein 6 precursor | R.RHLDSVLQQLQTEVYR.G              | 3 | 4.39 | 0.31 | -3.51 |
| IPI00029236 | Insulin-like growth factor-binding protein 5 precursor | K.FVGGAEHTAHPR.I                  | 2 | 2.73 | 0.33 | -2.73 |
| IPI00029236 | Insulin-like growth factor-binding protein 5 precursor | R.EHEEPTTSEM*AEETYSPI             | 3 | 3.37 | 0.47 | -1.24 |
| IPI00029236 | Insulin-like growth factor-binding protein 5 precursor | R.IISAPEM*R.Q                     | 2 | 2.24 | 0.09 | -2.46 |

|             |                                                        |                                      |   |      |      |       |
|-------------|--------------------------------------------------------|--------------------------------------|---|------|------|-------|
| IPI00029236 | Insulin-like growth factor-binding protein 5 precursor | R.ISELKAEAV.K                        | 1 | 2.04 | 0.16 | -2.84 |
| IPI00029236 | Insulin-like growth factor-binding protein 5 precursor | R.ISELKAEAVKK.D                      | 2 | 3.58 | 0.12 | -3.72 |
| IPI00029236 | Insulin-like growth factor-binding protein 5 precursor | R.ISELKAEAVKK.D                      | 3 | 2.79 | 0.12 | -4.37 |
| IPI00029260 | Monocyte differentiation antigen CD14 precursor        | F.PALTSLDLSDNPGLGER.G                | 2 | 5.14 | 0.49 | -3.82 |
| IPI00029260 | Monocyte differentiation antigen CD14 precursor        | H.SLDLHNSLR.A                        | 1 | 2.30 | 0.24 | -4.14 |
| IPI00029260 | Monocyte differentiation antigen CD14 precursor        | K.ELTLEDLK.I                         | 2 | 2.47 | 0.15 | -3.17 |
| IPI00029260 | Monocyte differentiation antigen CD14 precursor        | K.FPAIQNLALR.N                       | 2 | 3.72 | 0.31 | -2.07 |
| IPI00029260 | Monocyte differentiation antigen CD14 precursor        | K.ITGTM*PPLPLEATGLALSSLR.L           | 2 | 4.72 | 0.56 | -6.08 |
| IPI00029260 | Monocyte differentiation antigen CD14 precursor        | K.ITGTM*PPLPLEATGLALSSLR.L           | 3 | 4.46 | 0.37 | -4.27 |
| IPI00029260 | Monocyte differentiation antigen CD14 precursor        | K.VLSIAQAHSPAFSCEQVR.A               | 2 | 4.49 | 0.43 | -1.91 |
| IPI00029260 | Monocyte differentiation antigen CD14 precursor        | K.VLSIAQAHSPAFSCEQVR.A               | 3 | 5.70 | 0.56 | -3.18 |
| IPI00029260 | Monocyte differentiation antigen CD14 precursor        | R.AFPALTSLDLSDNPGLGER.G              | 2 | 6.31 | 0.55 | -4.33 |
| IPI00029260 | Monocyte differentiation antigen CD14 precursor        | R.AFPALTSLDLSDNPGLGER.G              | 3 | 5.70 | 0.54 | -3.77 |
| IPI00029260 | Monocyte differentiation antigen CD14 precursor        | R.ATVNPSAPR.C                        | 1 | 1.79 | 0.08 | -2.96 |
| IPI00029260 | Monocyte differentiation antigen CD14 precursor        | R.ATVNPSAPR.C                        | 2 | 2.36 | 0.18 | -2.59 |
| IPI00029260 | Monocyte differentiation antigen CD14 precursor        | R.CM*WSSALNSLNSFAGLEQVPK.G           | 2 | 4.52 | 0.60 | -3.08 |
| IPI00029260 | Monocyte differentiation antigen CD14 precursor        | R.CM*WSSALNSLNSFAGLEQVPK.G           | 3 | 2.37 | 0.24 | -4.70 |
| IPI00029260 | Monocyte differentiation antigen CD14 precursor        | R.GLM*AALCPHKFPAIQNLALR.N            | 3 | 5.34 | 0.52 | -4.17 |
| IPI00029260 | Monocyte differentiation antigen CD14 precursor        | R.GLM*AALCPHKFPAIQNLALR.N            | 4 | 3.05 | 0.34 | -2.81 |
| IPI00029260 | Monocyte differentiation antigen CD14 precursor        | R.LKELTLEDLK.I                       | 1 | 3.04 | 0.18 | -4.21 |
| IPI00029260 | Monocyte differentiation antigen CD14 precursor        | R.LKELTLEDLK.I                       | 2 | 3.57 | 0.22 | -3.69 |
| IPI00029260 | Monocyte differentiation antigen CD14 precursor        | R.LKELTLEDLK.I                       | 3 | 3.81 | 0.10 | -3.80 |
| IPI00029260 | Monocyte differentiation antigen CD14 precursor        | R.LKELTLEDLKITGTM*PPLPLEATGLALSSLR.L | 3 | 4.05 | 0.38 | -2.78 |
| IPI00029260 | Monocyte differentiation antigen CD14 precursor        | R.LKELTLEDLKITGTM*PPLPLEATGLALSSLR.L | 4 | 3.10 | 0.23 | -2.67 |
| IPI00029260 | Monocyte differentiation antigen CD14 precursor        | R.LTVGAAQVPAQLLVGALR.V               | 2 | 5.01 | 0.49 | -4.93 |
| IPI00029260 | Monocyte differentiation antigen CD14 precursor        | R.LTVGAAQVPAQLLVGALR.V               | 3 | 5.05 | 0.27 | -2.48 |
| IPI00029260 | Monocyte differentiation antigen CD14 precursor        | R.NTGM*ETPTGVCAALAAAGVQPH.S          | 2 | 5.73 | 0.56 | -3.29 |
| IPI00029260 | Monocyte differentiation antigen CD14 precursor        | R.NTGM*ETPTGVCAALAAAGVQPH.S          | 3 | 3.87 | 0.37 | -4.66 |
| IPI00029260 | Monocyte differentiation antigen CD14 precursor        | R.NTGM*ETPTGVCAALAAAGVQPHSLDLHNSLR.A | 3 | 5.86 | 0.53 | -3.37 |
| IPI00029260 | Monocyte differentiation antigen CD14 precursor        | R.NTGM*ETPTGVCAALAAAGVQPHSLDLHNSLR.A | 4 | 7.12 | 0.58 | -1.67 |
| IPI00029260 | Monocyte differentiation antigen CD14 precursor        | R.RLTVGAAQVPAQLLVGALR.V              | 2 | 6.68 | 0.53 | -5.07 |
| IPI00029260 | Monocyte differentiation antigen CD14 precursor        | R.RLTVGAAQVPAQLLVGALR.V              | 3 | 5.07 | 0.44 | -4.49 |
| IPI00029260 | Monocyte differentiation antigen CD14 precursor        | R.SWLAEQQWLKPLK.V                    | 2 | 4.58 | 0.48 | -4.57 |
| IPI00029260 | Monocyte differentiation antigen CD14 precursor        | R.SWLAEQQWLKPLK.V                    | 3 | 2.82 | 0.25 | -4.04 |
| IPI00029260 | Monocyte differentiation antigen CD14 precursor        | R.VDADADPR.Q                         | 2 | 2.33 | 0.08 | -3.13 |
| IPI00029260 | Monocyte differentiation antigen CD14 precursor        | R.VLDLSCNR.L                         | 1 | 2.03 | 0.10 | -2.46 |
| IPI00029260 | Monocyte differentiation antigen CD14 precursor        | R.VLDLSCNR.L                         | 2 | 3.06 | 0.26 | -2.00 |
| IPI00029260 | Monocyte differentiation antigen CD14 precursor        | V.PAQLLVGALR.V                       | 1 | 2.73 | 0.25 | -4.35 |
| IPI00029260 | Monocyte differentiation antigen CD14 precursor        | W.LAEQQWLKPLK.V                      | 2 | 3.05 | 0.21 | -4.16 |

|             |                                                            |                                   |   |      |      |       |
|-------------|------------------------------------------------------------|-----------------------------------|---|------|------|-------|
| IPI00029273 | Isoform 1 of Hepatocyte growth factor receptor precursor   | K.AFFM*LDGILSK.Y                  | 2 | 3.08 | 0.34 | -3.15 |
| IPI00029273 | Isoform 1 of Hepatocyte growth factor receptor precursor   | K.EVFNILQAAYVSKPGAQLAR.Q          | 2 | 4.61 | 0.51 | -2.02 |
| IPI00029273 | Isoform 1 of Hepatocyte growth factor receptor precursor   | K.EVFNILQAAYVSKPGAQLAR.Q          | 3 | 4.04 | 0.44 | -2.81 |
| IPI00029273 | Isoform 1 of Hepatocyte growth factor receptor precursor   | K.GDLTIANLGTSEGR.F                | 2 | 4.23 | 0.45 | -3.54 |
| IPI00029273 | Isoform 1 of Hepatocyte growth factor receptor precursor   | K.NLNSVSVPR.M                     | 2 | 2.27 | 0.14 | 1.92  |
| IPI00029273 | Isoform 1 of Hepatocyte growth factor receptor precursor   | K.SFISGGSTITGVGK.N                | 2 | 2.60 | 0.32 | -3.02 |
| IPI00029273 | Isoform 1 of Hepatocyte growth factor receptor precursor   | R.FM*QVVVSR.S                     | 2 | 2.65 | 0.20 | -1.92 |
| IPI00029273 | Isoform 1 of Hepatocyte growth factor receptor precursor   | R.TEFTTALQR.V                     | 2 | 2.55 | 0.19 | -2.31 |
| IPI00029275 | Isoform 1 of Melanotransferrin precursor                   | K.HSTVLENTDGK.T                   | 2 | 2.19 | 0.36 | -2.82 |
| IPI00029275 | Isoform 1 of Melanotransferrin precursor                   | K.TLPSWGQALLSQDFELLCR.D           | 3 | 3.58 | 0.33 | -4.08 |
| IPI00029275 | Isoform 1 of Melanotransferrin precursor                   | R.ADTDGGLIFR.L                    | 2 | 2.75 | 0.31 | -3.54 |
| IPI00029275 | Isoform 1 of Melanotransferrin precursor                   | R.DSSHAFTLDEL.R.G                 | 2 | 2.89 | 0.12 | -2.19 |
| IPI00029275 | Isoform 1 of Melanotransferrin precursor                   | R.IQAEQVDAVTLSGEDIYTAGK.K         | 2 | 5.56 | 0.50 | -3.88 |
| IPI00029275 | Isoform 1 of Melanotransferrin precursor                   | R.VPAHAVVVR.A                     | 2 | 2.64 | 0.30 | -3.49 |
| IPI00029343 | Isoform 1 of Contactin-associated protein-like 2 precursor | K.DAGFLSYK.D                      | 2 | 2.48 | 0.17 | -1.33 |
| IPI00029343 | Isoform 1 of Contactin-associated protein-like 2 precursor | K.DAGFLSYKDHLVPSQVVVGDTDR.Q       | 3 | 4.64 | 0.38 | -5.05 |
| IPI00029343 | Isoform 1 of Contactin-associated protein-like 2 precursor | K.DAGFLSYKDHLVPSQVVVGDTDR.Q       | 4 | 2.81 | 0.12 | -2.86 |
| IPI00029343 | Isoform 1 of Contactin-associated protein-like 2 precursor | K.DAGFLSYKDHLVPSQVVVGDTDRQGSEAK.L | 4 | 3.93 | 0.24 | -1.13 |
| IPI00029343 | Isoform 1 of Contactin-associated protein-like 2 precursor | K.DVIALNFK.T                      | 1 | 2.21 | 0.14 | -3.51 |
| IPI00029343 | Isoform 1 of Contactin-associated protein-like 2 precursor | K.DVIALNFK.T                      | 2 | 2.75 | 0.08 | -1.28 |
| IPI00029343 | Isoform 1 of Contactin-associated protein-like 2 precursor | K.LDHYPVSVSYHLPSSDTLFSNPK.S       | 3 | 3.27 | 0.26 | -3.91 |
| IPI00029343 | Isoform 1 of Contactin-associated protein-like 2 precursor | K.M*SQIDISSGSGSLNDGQWHEVR.F       | 3 | 3.88 | 0.45 | -1.39 |
| IPI00029343 | Isoform 1 of Contactin-associated protein-like 2 precursor | K.QASLQVDRLPQQIR.K                | 2 | 2.86 | 0.17 | -2.85 |
| IPI00029343 | Isoform 1 of Contactin-associated protein-like 2 precursor | K.QISAIATQGR.Y                    | 1 | 2.00 | 0.21 | -2.75 |

|             |                                                            |                                   |   |      |      |       |
|-------------|------------------------------------------------------------|-----------------------------------|---|------|------|-------|
| IPI00029343 | Isoform 1 of Contactin-associated protein-like 2 precursor | K.TLKDVIALNFK.T                   | 2 | 3.70 | 0.42 | -2.88 |
| IPI00029343 | Isoform 1 of Contactin-associated protein-like 2 precursor | K.TLKDVIALNFK.T                   | 3 | 2.88 | 0.11 | -3.70 |
| IPI00029343 | Isoform 1 of Contactin-associated protein-like 2 precursor | K.VIETGKIDQEIHK.Y                 | 2 | 2.32 | 0.15 | -3.98 |
| IPI00029343 | Isoform 1 of Contactin-associated protein-like 2 precursor | K.YNTPGFTGCLSR.V                  | 2 | 2.55 | 0.31 | -3.00 |
| IPI00029343 | Isoform 1 of Contactin-associated protein-like 2 precursor | R.HELQHPIAR.Y                     | 2 | 2.44 | 0.29 | -4.22 |
| IPI00029343 | Isoform 1 of Contactin-associated protein-like 2 precursor | R.KDAGFLSYKDHLVPSQVVVGDTRQGSEAK.L | 4 | 4.18 | 0.33 | -2.13 |
| IPI00029343 | Isoform 1 of Contactin-associated protein-like 2 precursor | R.KQISAIATQGR.Y                   | 2 | 3.06 | 0.27 | -3.19 |
| IPI00029343 | Isoform 1 of Contactin-associated protein-like 2 precursor | R.LLNTPDGSPYTWWVGK.A              | 2 | 4.48 | 0.51 | -3.50 |
| IPI00029343 | Isoform 1 of Contactin-associated protein-like 2 precursor | R.M*LYSDTGR.N                     | 2 | 2.55 | 0.29 | -3.03 |
| IPI00029343 | Isoform 1 of Contactin-associated protein-like 2 precursor | R.M*NGVTLBLEER.A                  | 2 | 3.16 | 0.24 | -2.95 |
| IPI00029343 | Isoform 1 of Contactin-associated protein-like 2 precursor | R.TNSPLQVK.T                      | 2 | 2.08 | 0.07 | 0.02  |
| IPI00029343 | Isoform 1 of Contactin-associated protein-like 2 precursor | R.VDNAPDQQNSHPDLAQEEIR.F          | 3 | 2.64 | 0.27 | -1.54 |
| IPI00029343 | Isoform 1 of Contactin-associated protein-like 2 precursor | R.VQFNQIAPLK.A                    | 1 | 2.40 | 0.09 | -2.30 |
| IPI00029343 | Isoform 1 of Contactin-associated protein-like 2 precursor | R.VQFNQIAPLK.A                    | 2 | 3.07 | 0.19 | -2.84 |
| IPI00029343 | Isoform 1 of Contactin-associated protein-like 2 precursor | R.YNFQAPATNAR.D                   | 2 | 2.91 | 0.35 | -2.01 |
| IPI00029343 | Isoform 1 of Contactin-associated protein-like 2 precursor | R.YNLGGTREPYNIDVDHR.N             | 4 | 2.71 | 0.27 | -1.46 |
| IPI00029343 | Isoform 1 of Contactin-associated protein-like 2 precursor | R.YSSSDWVTQYR.M                   | 2 | 3.57 | 0.39 | -2.84 |
| IPI00029372 | Uncharacterized protein C4orf15                            | K.ISSLTSEIMK.L                    | 2 | 2.78 | 0.11 |       |
| IPI00029533 | Integrin beta-8 precursor                                  | K.M*AFFSRDFR.L                    | 2 | 2.27 | 0.15 |       |
| IPI00029556 | Uncharacterized protein C1orf105                           | K.MVQPRTMKIPDDPK.A                | 3 | 4.09 | 0.14 |       |
| IPI00029591 | P-selectin glycoprotein ligand 1 precursor                 | K.ALGPILLARD.R                    | 1 | 2.06 | 0.39 | -2.74 |
| IPI00029605 | N-acetylgalactosamine-6-sulfatase precursor                | K.LPLIFHLGR.D                     | 2 | 1.95 | 0.09 | -2.40 |
| IPI00029605 | N-acetylgalactosamine-6-sulfatase precursor                | R.AIDGLNLLPTLLQGR.L               | 2 | 4.21 | 0.40 | -2.33 |
| IPI00029605 | N-acetylgalactosamine-6-sulfatase precursor                | R.EIDDSIGK.I                      | 2 | 1.80 | 0.17 | -2.70 |
| IPI00029605 | N-acetylgalactosamine-6-sulfatase precursor                | R.LM*DRPIFYR.G                    | 3 | 3.03 | 0.10 | -2.48 |

|             |                                                                                   |                                |   |      |      |       |
|-------------|-----------------------------------------------------------------------------------|--------------------------------|---|------|------|-------|
| IPI00029605 | N-acetylgalactosamine-6-sulfatase precursor                                       | R.NAYTPQEIVGGIPDSEQLLPELLKK.A  | 3 | 3.10 | 0.33 | -1.20 |
| IPI00029605 | N-acetylgalactosamine-6-sulfatase precursor                                       | R.NGFYTTNAHAR.N                | 2 | 1.28 | 0.19 | -0.74 |
| IPI00029605 | N-acetylgalactosamine-6-sulfatase precursor                                       | R.YYEEFPINLK.T                 | 2 | 3.62 | 0.26 | -2.51 |
| IPI00029606 | Isoform B of ADAM 17 precursor                                                    | A.PRPDPDPGFGPHQR.L             | 3 | 3.72 | 0.38 | -2.31 |
| IPI00029606 | Isoform B of ADAM 17 precursor                                                    | K.LDSLLSDYDILSLSNIQQHSV.R      | 2 | 5.70 | 0.55 | -2.67 |
| IPI00029606 | Isoform B of ADAM 17 precursor                                                    | K.LDSLLSDYDILSLSNIQQHSV.R      | 3 | 5.40 | 0.50 | -3.96 |
| IPI00029606 | Isoform B of ADAM 17 precursor                                                    | R.LEKLDSSLSDYDILSLSNIQQHSV.R   | 2 | 5.06 | 0.44 | -4.02 |
| IPI00029606 | Isoform B of ADAM 17 precursor                                                    | R.LEKLDSSLSDYDILSLSNIQQHSV.R   | 3 | 4.88 | 0.49 | -4.46 |
| IPI00029606 | Isoform B of ADAM 17 precursor                                                    | R.LEKLDSSLSDYDILSLSNIQQHSVR.K  | 4 | 4.71 | 0.22 | -2.52 |
| IPI00029606 | Isoform B of ADAM 17 precursor                                                    | R.LEKLDSSLSDYDILSLSNIQQHSVRK.R | 4 | 4.20 | 0.41 | -5.51 |
| IPI00029623 | Proteasome subunit alpha type-6                                                   | K.AINQGGLTSAVAVR.G             | 2 | 3.09 | 0.28 | -0.88 |
| IPI00029623 | Proteasome subunit alpha type-6                                                   | R.ILTEAEIDAHLVALAERD.-         | 3 | 3.24 | 0.23 | -4.23 |
| IPI00029647 | Zymogen granule membrane protein 16 precursor                                     | R.SSSYSGEYSGGGGKR.F            | 2 | 2.71 | 0.31 |       |
| IPI00029658 | Isoform 1 of EGF-containing fibulin-like extracellular matrix protein 1 precursor | K.CVNHYGGYLCLPK.T              | 2 | 3.71 | 0.27 |       |
| IPI00029658 | Isoform 1 of EGF-containing fibulin-like extracellular matrix protein 1 precursor | K.CVNHYGGYLCLPK.T              | 3 | 4.24 | 0.20 |       |
| IPI00029658 | Isoform 1 of EGF-containing fibulin-like extracellular matrix protein 1 precursor | K.DIDECDIVPDACK.G              | 2 | 4.41 | 0.48 |       |
| IPI00029658 | Isoform 1 of EGF-containing fibulin-like extracellular matrix protein 1 precursor | K.DIDECDIVPDACKGGM*K.C         | 2 | 4.48 | 0.38 |       |
| IPI00029658 | Isoform 1 of EGF-containing fibulin-like extracellular matrix protein 1 precursor | K.FSCM*CPQGYQVVR.S             | 2 | 4.32 | 0.44 | -2.16 |
| IPI00029658 | Isoform 1 of EGF-containing fibulin-like extracellular matrix protein 1 precursor | K.FSCMCPQGYQVVR.S              | 2 | 3.50 | 0.37 |       |
| IPI00029658 | Isoform 1 of EGF-containing fibulin-like extracellular matrix protein 1 precursor | K.RGEQCVDIDECTIPPYCHQR.C       | 2 | 4.34 | 0.20 |       |
| IPI00029658 | Isoform 1 of EGF-containing fibulin-like extracellular matrix protein 1 precursor | K.RGEQCVDIDECTIPPYCHQR.C       | 3 | 4.29 | 0.15 |       |
| IPI00029658 | Isoform 1 of EGF-containing fibulin-like extracellular matrix protein 1 precursor | K.SGNENGEFYLR.Q                | 2 | 3.04 | 0.29 |       |
| IPI00029658 | Isoform 1 of EGF-containing fibulin-like extracellular matrix protein 1 precursor | R.ADQVCINLR.G                  | 1 | 2.07 | 0.06 |       |
| IPI00029658 | Isoform 1 of EGF-containing fibulin-like extracellular matrix protein 1 precursor | R.ADQVCINLR.G                  | 2 | 2.91 | 0.20 | -1.70 |
| IPI00029658 | Isoform 1 of EGF-containing fibulin-like extracellular matrix protein 1 precursor | R.CVCPVSNAM*CR.E               | 2 | 3.23 | 0.34 |       |
| IPI00029658 | Isoform 1 of EGF-containing fibulin-like extracellular matrix protein 1 precursor | R.CVCPVSNAMCR.E                | 2 | 2.68 | 0.21 |       |
| IPI00029658 | Isoform 1 of EGF-containing fibulin-like extracellular matrix protein 1 precursor | R.CYPRNPCQDPYILTPENR.C         | 2 | 3.97 | 0.31 |       |



|             |                                                                                   |                                     |   |      |      |       |
|-------------|-----------------------------------------------------------------------------------|-------------------------------------|---|------|------|-------|
| IPI00029658 | Isoform 1 of EGF-containing fibulin-like extracellular matrix protein 1 precursor | R.EHIVDLEM*LTVSSIGTFR.T             | 2 | 3.16 | 0.21 |       |
| IPI00029658 | Isoform 1 of EGF-containing fibulin-like extracellular matrix protein 1 precursor | R.ELPQSIVYK.Y                       | 1 | 2.75 | 0.18 |       |
| IPI00029658 | Isoform 1 of EGF-containing fibulin-like extracellular matrix protein 1 precursor | R.GEQCVDIDECTIPPYCHQR.C             | 2 | 4.99 | 0.33 |       |
| IPI00029658 | Isoform 1 of EGF-containing fibulin-like extracellular matrix protein 1 precursor | R.GSFACQCPPGYQK.R                   | 2 | 4.91 | 0.27 |       |
| IPI00029658 | Isoform 1 of EGF-containing fibulin-like extracellular matrix protein 1 precursor | R.IKSGNENGEFYLR.Q                   | 2 | 3.34 | 0.21 |       |
| IPI00029658 | Isoform 1 of EGF-containing fibulin-like extracellular matrix protein 1 precursor | R.IQCAAGYEQSEHNVCQDIDECTAGTHNCR.A   | 2 | 4.24 | 0.42 |       |
| IPI00029658 | Isoform 1 of EGF-containing fibulin-like extracellular matrix protein 1 precursor | R.IQCAAGYEQSEHNVCQDIDECTAGTHNCR.A   | 3 | 6.94 | 0.42 |       |
| IPI00029658 | Isoform 1 of EGF-containing fibulin-like extracellular matrix protein 1 precursor | R.NPADPQRIPSN.P                     | 2 | 3.02 | 0.38 | -3.01 |
| IPI00029658 | Isoform 1 of EGF-containing fibulin-like extracellular matrix protein 1 precursor | R.NPADPQRIPSNPSHR.I                 | 2 | 1.69 | 0.10 | -4.08 |
| IPI00029658 | Isoform 1 of EGF-containing fibulin-like extracellular matrix protein 1 precursor | R.NPADPQRIPSNPSHR.I                 | 3 | 3.20 | 0.38 | -3.16 |
| IPI00029658 | Isoform 1 of EGF-containing fibulin-like extracellular matrix protein 1 precursor | R.NPADPQRIPSNPSHR.I                 | 4 | 3.32 | 0.28 | -3.25 |
| IPI00029658 | Isoform 1 of EGF-containing fibulin-like extracellular matrix protein 1 precursor | R.NPCQDPYILTPENR.C                  | 2 | 4.67 | 0.35 | -3.49 |
| IPI00029658 | Isoform 1 of EGF-containing fibulin-like extracellular matrix protein 1 precursor | R.QQCKDIDECDIVPDAK.G                | 3 | 3.87 | 0.29 |       |
| IPI00029658 | Isoform 1 of EGF-containing fibulin-like extracellular matrix protein 1 precursor | R.QTSPVSAM*LVLVK.S                  | 2 | 3.01 | 0.32 |       |
| IPI00029658 | Isoform 1 of EGF-containing fibulin-like extracellular matrix protein 1 precursor | R.QTSPVSAMLVLVK.S                   | 2 | 2.85 | 0.26 |       |
| IPI00029658 | Isoform 1 of EGF-containing fibulin-like extracellular matrix protein 1 precursor | R.SVPSDIFQIQATTIYANTINTFR.I         | 2 | 4.42 | 0.48 | -4.20 |
| IPI00029658 | Isoform 1 of EGF-containing fibulin-like extracellular matrix protein 1 precursor | R.SVPSDIFQIQATTIYANTINTFR.I         | 3 | 4.19 | 0.34 |       |
| IPI00029658 | Isoform 1 of EGF-containing fibulin-like extracellular matrix protein 1 precursor | R.TCQDINECETTNECREDEM*CWNYHGGFR.C   | 3 | 5.25 | 0.43 |       |
| IPI00029658 | Isoform 1 of EGF-containing fibulin-like extracellular matrix protein 1 precursor | R.TSSYLQCQYQCVNEPGKFSCM*CPQGYQVVR.S | 3 | 5.20 | 0.46 |       |
| IPI00029693 | Isoform A22 of Neuropilin-2 precursor                                             | K.IVLNFNPHFEIEK.H                   | 3 | 1.63 | 0.10 | -1.30 |
| IPI00029693 | Isoform A22 of Neuropilin-2 precursor                                             | K.LHAPLLTR.F                        | 1 | 1.98 | 0.14 | -4.67 |
| IPI00029693 | Isoform A22 of Neuropilin-2 precursor                                             | K.VFQANNDATEVVLNK.L                 | 2 | 4.40 | 0.36 | -3.02 |
| IPI00029693 | Isoform A22 of Neuropilin-2 precursor                                             | K.YDWLDIWDGIPHVGPLIGK.Y             | 3 | 4.48 | 0.39 | -4.30 |

|             |                                                                |                                              |   |      |      |       |
|-------------|----------------------------------------------------------------|----------------------------------------------|---|------|------|-------|
| IPI00029693 | Isoform A22 of Neuropilin-2 precursor                          | R.DGDSEADLLGK.H                              | 2 | 3.94 | 0.37 | -2.23 |
| IPI00029693 | Isoform A22 of Neuropilin-2 precursor                          | R.FLTM*LTAIATQGAISR.E                        | 3 | 3.27 | 0.07 | -3.60 |
| IPI00029693 | Isoform A22 of Neuropilin-2 precursor                          | R.GGDSITAVEAR.A                              | 2 | 3.71 | 0.26 | -2.52 |
| IPI00029693 | Isoform A22 of Neuropilin-2 precursor                          | R.IANEQISASSTYSYDGR.W                        | 2 | 4.50 | 0.52 | -4.72 |
| IPI00029693 | Isoform A22 of Neuropilin-2 precursor                          | R.LELFGCR.V                                  | 2 | 2.46 | 0.16 | -1.26 |
| IPI00029693 | Isoform A22 of Neuropilin-2 precursor                          | R.SGEIAIDDIR.I                               | 2 | 3.54 | 0.20 | -5.71 |
| IPI00029693 | Isoform A22 of Neuropilin-2 precursor                          | R.SPVCM*EFQYQATGGR.G                         | 2 | 2.65 | 0.39 | -4.13 |
| IPI00029699 | Ribonuclease 4 precursor                                       | R.FNTFIHEDIWNIR.S                            | 2 | 4.03 | 0.36 |       |
| IPI00029699 | Ribonuclease 4 precursor                                       | R.FNTFIHEDIWNIR.S                            | 3 | 3.83 | 0.23 |       |
| IPI00029699 | Ribonuclease 4 precursor                                       | R.RVVIACEGNPQVPVHFDG.-                       | 2 | 3.31 | 0.31 |       |
| IPI00029699 | Ribonuclease 4 precursor                                       | R.SICSTTNIQCK.N                              | 2 | 3.49 | 0.29 |       |
| IPI00029699 | Ribonuclease 4 precursor                                       | R.YCNLM*M*QR.R                               | 2 | 2.28 | 0.25 |       |
| IPI00029700 | Isoform Long of Down syndrome cell adhesion molecule precursor | K.VSNDVGADVSK.S                              | 2 | 3.30 | 0.28 | -2.46 |
| IPI00029700 | Isoform Long of Down syndrome cell adhesion molecule precursor | R.VIGYPYYSIK.W                               | 2 | 2.25 | 0.18 | -2.81 |
| IPI00029722 | Kinesin heavy chain isoform 5A                                 | R.LRATAERVKALEGALKEAKEGAMKDKR.R              | 3 | 3.06 | 0.18 |       |
| IPI00029723 | Follistatin-related protein 1 precursor                        | K.CLNPSFNPPEK.K                              | 2 | 2.59 | 0.22 | -1.57 |
| IPI00029723 | Follistatin-related protein 1 precursor                        | K.GAQTQTEEM*TR.Y                             | 2 | 4.23 | 0.41 | -3.81 |
| IPI00029723 | Follistatin-related protein 1 precursor                        | K.GAQTQTEEM*TR.Y                             | 3 | 3.73 | 0.27 | -3.23 |
| IPI00029723 | Follistatin-related protein 1 precursor                        | K.GAQTQTEEM*TRYVQELQK.H                      | 3 | 2.74 | 0.28 | -2.08 |
| IPI00029723 | Follistatin-related protein 1 precursor                        | K.ICANVFCGAGR.E                              | 2 | 3.90 | 0.47 | -1.88 |
| IPI00029723 | Follistatin-related protein 1 precursor                        | K.LSFQEFLK.C                                 | 2 | 2.99 | 0.14 | -1.57 |
| IPI00029723 | Follistatin-related protein 1 precursor                        | K.NFDNGDSRLDSSEFLK.F                         | 2 | 4.21 | 0.40 | -4.00 |
| IPI00029723 | Follistatin-related protein 1 precursor                        | R.CVCACGNWVCTAM*TCDGK.N                      | 2 | 4.70 | 0.66 | -2.56 |
| IPI00029723 | Follistatin-related protein 1 precursor                        | R.DAACLTKGSK.I                               | 2 | 1.81 | 0.14 | -4.42 |
| IPI00029723 | Follistatin-related protein 1 precursor                        | R.YVQELQKHQETAEK.T                           | 2 | 4.48 | 0.42 | -4.98 |
| IPI00029723 | Follistatin-related protein 1 precursor                        | R.YVQELQKHQETAEK.T                           | 3 | 2.55 | 0.27 | -2.05 |
| IPI00029739 | Isoform 1 of Complement factor H precursor                     | K.AGEQVYTCATYYK.M                            | 2 | 4.95 | 0.53 | -2.13 |
| IPI00029739 | Isoform 1 of Complement factor H precursor                     | K.AGEQVYTCATYYK.M                            | 3 | 4.26 | 0.10 |       |
| IPI00029739 | Isoform 1 of Complement factor H precursor                     | K.AQTTVTCM*ENGWSPTPR.C                       | 2 | 4.82 | 0.42 |       |
| IPI00029739 | Isoform 1 of Complement factor H precursor                     | K.AQTTVTCMENGWSPTPR.C                        | 2 | 2.54 | 0.17 |       |
| IPI00029739 | Isoform 1 of Complement factor H precursor                     | K.AVYTCNEGYQLLGEINYR.E                       | 2 | 5.34 | 0.49 | -2.57 |
| IPI00029739 | Isoform 1 of Complement factor H precursor                     | K.AVYTCNEGYQLLGEINYR.E                       | 3 | 3.53 | 0.09 | -2.56 |
| IPI00029739 | Isoform 1 of Complement factor H precursor                     | K.AVYTCNEGYQLLGEINYPRECDTDGWTNDIPICEVVK.C    | 3 | 5.72 | 0.44 |       |
| IPI00029739 | Isoform 1 of Complement factor H precursor                     | K.CFEGFGIDGPAIAK.C                           | 1 | 3.29 | 0.33 |       |
| IPI00029739 | Isoform 1 of Complement factor H precursor                     | K.CFEGFGIDGPAIAK.C                           | 2 | 4.59 | 0.54 | -2.74 |
| IPI00029739 | Isoform 1 of Complement factor H precursor                     | K.CGPPPIDNGDITSFPLSVYAPASSVEYQCQNLYQLEGNKR.I | 3 | 5.17 | 0.49 | -3.33 |
| IPI00029739 | Isoform 1 of Complement factor H precursor                     | K.CLPVTAPENK.I                               | 1 | 2.54 | 0.15 |       |
| IPI00029739 | Isoform 1 of Complement factor H precursor                     | K.CLPVTAPENK.I                               | 2 | 3.06 | 0.24 |       |
| IPI00029739 | Isoform 1 of Complement factor H precursor                     | K.CNM*GYEYSER.G                              | 2 | 2.74 | 0.30 | -3.66 |
| IPI00029739 | Isoform 1 of Complement factor H precursor                     | K.CNM*GYEYSERGDVCTESGWRPLPSCEEK.S            | 3 | 4.54 | 0.33 |       |

|             |                                            |                                    |   |      |      |       |
|-------------|--------------------------------------------|------------------------------------|---|------|------|-------|
| IPI00029739 | Isoform 1 of Complement factor H precursor | K.CNMGYEYSERGDVCTESGWRPLPSCEEK.S   | 3 | 5.47 | 0.44 |       |
| IPI00029739 | Isoform 1 of Complement factor H precursor | K.CTSTGWIPAPR.C                    | 2 | 2.94 | 0.45 | -2.15 |
| IPI00029739 | Isoform 1 of Complement factor H precursor | K.CVEISCKSPDVINGSPISQK.I           | 2 | 6.46 | 0.45 |       |
| IPI00029739 | Isoform 1 of Complement factor H precursor | K.CVEISCKSPDVINGSPISQK.I           | 3 | 5.11 | 0.16 |       |
| IPI00029739 | Isoform 1 of Complement factor H precursor | K.CYFPYLENGYNQNYGR.K               | 2 | 4.76 | 0.43 |       |
| IPI00029739 | Isoform 1 of Complement factor H precursor | K.CYFPYLENGYNQNYGR.K               | 3 | 5.71 | 0.28 |       |
| IPI00029739 | Isoform 1 of Complement factor H precursor | K.DGWSAQPTCIK.S                    | 2 | 2.82 | 0.13 | -2.43 |
| IPI00029739 | Isoform 1 of Complement factor H precursor | K.DQYKVGVEVLK.F                    | 2 | 2.59 | 0.20 | -0.68 |
| IPI00029739 | Isoform 1 of Complement factor H precursor | K.EFDHNSNIR.Y                      | 2 | 2.11 | 0.14 | -3.36 |
| IPI00029739 | Isoform 1 of Complement factor H precursor | K.EGWIHTVCINGR.W                   | 2 | 2.50 | 0.30 |       |
| IPI00029739 | Isoform 1 of Complement factor H precursor | K.EKTKEEYGHSEVVEYYCNP.R.F          | 2 | 6.02 | 0.45 |       |
| IPI00029739 | Isoform 1 of Complement factor H precursor | K.EKTKEEYGHSEVVEYYCNP.R.F          | 3 | 5.55 | 0.32 |       |
| IPI00029739 | Isoform 1 of Complement factor H precursor | K.EQVQSCGPPPELLNGNVK.E             | 2 | 4.88 | 0.44 | -2.16 |
| IPI00029739 | Isoform 1 of Complement factor H precursor | K.EQVQSCGPPPELLNGNVK.E             | 3 | 4.08 | 0.39 | -3.31 |
| IPI00029739 | Isoform 1 of Complement factor H precursor | K.FSCKPGFTIVGPNSVQCYHFLSPDL.PICK.E | 3 | 4.87 | 0.34 |       |
| IPI00029739 | Isoform 1 of Complement factor H precursor | K.IDVHLPDR.K                       | 1 | 2.03 | 0.27 | -1.65 |
| IPI00029739 | Isoform 1 of Complement factor H precursor | K.IDVHLPDR.K                       | 2 | 2.49 | 0.29 | -2.14 |
| IPI00029739 | Isoform 1 of Complement factor H precursor | K.IIYKENER.F                       | 1 | 2.62 | 0.07 |       |
| IPI00029739 | Isoform 1 of Complement factor H precursor | K.IIYKENER.F                       | 2 | 2.39 | 0.18 | -3.55 |
| IPI00029739 | Isoform 1 of Complement factor H precursor | K.IIYKENERFQYK.C                   | 2 | 2.83 | 0.05 |       |
| IPI00029739 | Isoform 1 of Complement factor H precursor | K.IVSSAM*EPDR.E                    | 2 | 2.81 | 0.18 |       |
| IPI00029739 | Isoform 1 of Complement factor H precursor | K.IVSSAM*EPDREYHFGQAVR.F           | 2 | 1.86 | 0.22 | -4.73 |
| IPI00029739 | Isoform 1 of Complement factor H precursor | K.IVSSAM*EPDREYHFGQAVR.F           | 3 | 3.16 | 0.38 | -3.55 |
| IPI00029739 | Isoform 1 of Complement factor H precursor | K.LGYVTADGETSGSITCGK.D             | 2 | 5.71 | 0.50 |       |
| IPI00029739 | Isoform 1 of Complement factor H precursor | K.LGYVTADGETSGSITCGKDGWSAQPTCIK.S  | 3 | 6.54 | 0.56 |       |
| IPI00029739 | Isoform 1 of Complement factor H precursor | K.LSYTCEGGFR.I                     | 1 | 1.81 | 0.22 |       |
| IPI00029739 | Isoform 1 of Complement factor H precursor | K.LSYTCEGGFR.I                     | 2 | 3.13 | 0.42 | -2.74 |
| IPI00029739 | Isoform 1 of Complement factor H precursor | K.RPCGHPGDTPFGTFTLTGGNVFEYGVK.A    | 3 | 6.37 | 0.52 |       |
| IPI00029739 | Isoform 1 of Complement factor H precursor | K.SCDIPVFM*NAR.T                   | 2 | 2.94 | 0.15 |       |
| IPI00029739 | Isoform 1 of Complement factor H precursor | K.SCDIPVFMNAR.T                    | 2 | 3.35 | 0.26 |       |
| IPI00029739 | Isoform 1 of Complement factor H precursor | K.SCDNPYIPNGDYSPLR.I               | 2 | 4.05 | 0.42 | -1.90 |
| IPI00029739 | Isoform 1 of Complement factor H precursor | K.SIDVACHPGYALPK.A                 | 1 | 2.38 | 0.12 |       |
| IPI00029739 | Isoform 1 of Complement factor H precursor | K.SIDVACHPGYALPK.A                 | 2 | 3.96 | 0.28 |       |
| IPI00029739 | Isoform 1 of Complement factor H precursor | K.SPDVINGSPISQK.I                  | 2 | 4.04 | 0.29 | -1.68 |
| IPI00029739 | Isoform 1 of Complement factor H precursor | K.SPPEISHGVVAHM*SDSYQYGEVYK.C      | 3 | 6.35 | 0.48 |       |
| IPI00029739 | Isoform 1 of Complement factor H precursor | K.SPPEISHGVVAHM*SDSYQYGEVYK.C      | 3 | 4.27 | 0.28 |       |
| IPI00029739 | Isoform 1 of Complement factor H precursor | K.SSIDIENGFISESQYTYALK.E           | 2 | 6.00 | 0.46 |       |
| IPI00029739 | Isoform 1 of Complement factor H precursor | K.SSIDIENGFISESQYTYALKEK.A         | 3 | 3.33 | 0.08 |       |
| IPI00029739 | Isoform 1 of Complement factor H precursor | K.SSNLIILEEHLK.N                   | 1 | 3.59 | 0.31 |       |
| IPI00029739 | Isoform 1 of Complement factor H precursor | K.SSNLIILEEHLK.N                   | 2 | 3.81 | 0.32 | -2.64 |
| IPI00029739 | Isoform 1 of Complement factor H precursor | K.SSNLIILEEHLK.N                   | 3 | 3.54 | 0.14 | -2.54 |
| IPI00029739 | Isoform 1 of Complement factor H precursor | K.TDCLSLPSFENAIPM*GEK.K            | 2 | 3.76 | 0.22 |       |

|             |                                            |                                |   |      |      |       |
|-------------|--------------------------------------------|--------------------------------|---|------|------|-------|
| IPI00029739 | Isoform 1 of Complement factor H precursor | K.TDCLSLPSFENAIPM*GEKK.D       | 2 | 2.62 | 0.20 |       |
| IPI00029739 | Isoform 1 of Complement factor H precursor | K.TDCLSLPSFENAIPM*GEKK.D       | 3 | 3.28 | 0.31 |       |
| IPI00029739 | Isoform 1 of Complement factor H precursor | K.TKEEYGHSEVVEYYCNPR.F         | 2 | 6.47 | 0.50 |       |
| IPI00029739 | Isoform 1 of Complement factor H precursor | K.TKEEYGHSEVVEYYCNPR.F         | 3 | 5.89 | 0.33 |       |
| IPI00029739 | Isoform 1 of Complement factor H precursor | K.TKEEYGHSEVVEYYCNPR.F         | 4 | 3.01 | 0.33 | -3.01 |
| IPI00029739 | Isoform 1 of Complement factor H precursor | K.VSVLCQENYLIQEGEEITCK.D       | 2 | 4.95 | 0.33 |       |
| IPI00029739 | Isoform 1 of Complement factor H precursor | K.VSVLCQENYLIQEGEEITCK.D       | 3 | 5.17 | 0.23 |       |
| IPI00029739 | Isoform 1 of Complement factor H precursor | K.VSVLCQENYLIQEGEEITCKDGR.W    | 2 | 3.41 | 0.31 |       |
| IPI00029739 | Isoform 1 of Complement factor H precursor | K.VSVLCQENYLIQEGEEITCKDGR.W    | 3 | 3.36 | 0.24 |       |
| IPI00029739 | Isoform 1 of Complement factor H precursor | K.WSSPPQCEGLPCK.S              | 2 | 3.07 | 0.29 | -2.43 |
| IPI00029739 | Isoform 1 of Complement factor H precursor | R.CIRVKTCSSIDIENGFISESQTYALK.E | 3 | 3.64 | 0.19 |       |
| IPI00029739 | Isoform 1 of Complement factor H precursor | R.ECDTDGWTNDIPICEVVK.C         | 2 | 4.65 | 0.38 |       |
| IPI00029739 | Isoform 1 of Complement factor H precursor | R.ECELPKIDVHLPDR.K             | 2 | 3.44 | 0.30 |       |
| IPI00029739 | Isoform 1 of Complement factor H precursor | R.ECELPKIDVHLPDR.K             | 3 | 3.47 | 0.43 |       |
| IPI00029739 | Isoform 1 of Complement factor H precursor | R.EIM*ENYNIALR.W               | 2 | 2.73 | 0.35 | -4.22 |
| IPI00029739 | Isoform 1 of Complement factor H precursor | R.FVCNSGYK.I                   | 1 | 2.08 | 0.13 |       |
| IPI00029739 | Isoform 1 of Complement factor H precursor | R.FVCNSGYKIEGDEEM*HCSDDGFWSK.E | 3 | 4.93 | 0.39 |       |
| IPI00029739 | Isoform 1 of Complement factor H precursor | R.FVCNSGYKIEGDEEMHCSDDGFWSK.E  | 3 | 5.66 | 0.38 |       |
| IPI00029739 | Isoform 1 of Complement factor H precursor | R.GDAVCTESGWRPLPSCEEK.S        | 2 | 4.59 | 0.41 |       |
| IPI00029739 | Isoform 1 of Complement factor H precursor | R.GDAVCTESGWRPLPSCEEK.S        | 3 | 3.58 | 0.25 |       |
| IPI00029739 | Isoform 1 of Complement factor H precursor | R.KCYFPYLENGYNQNYGR.K          | 2 | 4.78 | 0.38 |       |
| IPI00029739 | Isoform 1 of Complement factor H precursor | R.KGEWVALNPLR.K                | 2 | 3.51 | 0.23 |       |
| IPI00029739 | Isoform 1 of Complement factor H precursor | R.KGEWVALNPLR.K                | 3 | 4.13 | 0.10 |       |
| IPI00029739 | Isoform 1 of Complement factor H precursor | R.NGFYPATR.G                   | 2 | 2.29 | 0.11 |       |
| IPI00029739 | Isoform 1 of Complement factor H precursor | R.NGQWSEPPKCLHPCVISR.E         | 3 | 3.60 | 0.35 |       |
| IPI00029739 | Isoform 1 of Complement factor H precursor | R.NTEILTGSWSDQTYPEGTQAIYK.C    | 2 | 4.68 | 0.58 | -3.39 |
| IPI00029739 | Isoform 1 of Complement factor H precursor | R.NTEILTGSWSDQTYPEGTQAIYK.C    | 3 | 3.65 | 0.38 | -5.24 |
| IPI00029739 | Isoform 1 of Complement factor H precursor | R.QMSKYPSEGER.V                | 2 | 2.87 | 0.22 |       |
| IPI00029739 | Isoform 1 of Complement factor H precursor | R.RNTEILTGSWSDQTYPEGTQAIYK.C   | 2 | 5.12 | 0.41 |       |
| IPI00029739 | Isoform 1 of Complement factor H precursor | R.RNTEILTGSWSDQTYPEGTQAIYK.C   | 3 | 3.88 | 0.25 |       |
| IPI00029739 | Isoform 1 of Complement factor H precursor | R.RPYFPVAVGK.Y                 | 1 | 1.68 | 0.07 | -2.78 |
| IPI00029739 | Isoform 1 of Complement factor H precursor | R.RPYFPVAVGK.Y                 | 2 | 3.15 | 0.20 | -3.65 |
| IPI00029739 | Isoform 1 of Complement factor H precursor | R.SITCIHGVWTQLPQCVAIDK.L       | 2 | 5.59 | 0.44 |       |
| IPI00029739 | Isoform 1 of Complement factor H precursor | R.SITCIHGVWTQLPQCVAIDK.L       | 3 | 2.84 | 0.07 | -3.05 |
| IPI00029739 | Isoform 1 of Complement factor H precursor | R.SITCIHGVWTQLPQCVAIDK.L       | 3 | 4.31 | 0.16 |       |
| IPI00029739 | Isoform 1 of Complement factor H precursor | R.SLGNVIM*VCR.K                | 2 | 2.91 | 0.37 | 0.97  |
| IPI00029739 | Isoform 1 of Complement factor H precursor | R.SLGNVIMVCR.K                 | 2 | 3.70 | 0.35 |       |
| IPI00029739 | Isoform 1 of Complement factor H precursor | R.SSQESYAHGTK.L                | 2 | 2.43 | 0.27 | -2.59 |
| IPI00029739 | Isoform 1 of Complement factor H precursor | R.TGESVEFVCK.R                 | 2 | 3.27 | 0.31 |       |
| IPI00029739 | Isoform 1 of Complement factor H precursor | R.TGESVEFVCKR.G                | 2 | 3.18 | 0.31 |       |
| IPI00029739 | Isoform 1 of Complement factor H precursor | R.TKNDFTWFK.L                  | 2 | 2.78 | 0.25 |       |
| IPI00029739 | Isoform 1 of Complement factor H precursor | R.TTCWDGKLEYPTCAK.R            | 2 | 4.43 | 0.42 |       |

|             |                                            |                                     |   |      |      |       |
|-------------|--------------------------------------------|-------------------------------------|---|------|------|-------|
| IPI00029739 | Isoform 1 of Complement factor H precursor | R.WQSIPLCVEK.I                      | 1 | 1.89 | 0.10 |       |
| IPI00029739 | Isoform 1 of Complement factor H precursor | R.WQSIPLCVEK.I                      | 2 | 2.71 | 0.20 | -2.73 |
| IPI00029739 | Isoform 1 of Complement factor H precursor | T.DTSCVNPPTVQNAYIVSR.Q              | 2 | 4.29 | 0.41 | -4.43 |
| IPI00029739 | Isoform 1 of Complement factor H precursor | T.DTSCVNPPTVQNAYIVSR.Q              | 3 | 3.75 | 0.42 | -4.38 |
| IPI00029751 | Isoform 1 of Contactin-1 precursor         | A.HSDGGDGVVSQVK.I                   | 2 | 3.98 | 0.52 | -2.43 |
| IPI00029751 | Isoform 1 of Contactin-1 precursor         | A.PSDVGGGGGR.N                      | 1 | 2.07 | 0.26 | -1.21 |
| IPI00029751 | Isoform 1 of Contactin-1 precursor         | D.GEYVVEVR.A                        | 2 | 2.93 | 0.31 | -0.95 |
| IPI00029751 | Isoform 1 of Contactin-1 precursor         | D.PPIIEGNM*EAAR.A                   | 2 | 3.27 | 0.37 | -1.55 |
| IPI00029751 | Isoform 1 of Contactin-1 precursor         | D.PPYHFPDDL.SYR.W                   | 2 | 4.01 | 0.38 | -4.53 |
| IPI00029751 | Isoform 1 of Contactin-1 precursor         | D.PPYHFPDDL.SYR.W                   | 3 | 4.63 | 0.43 | -1.13 |
| IPI00029751 | Isoform 1 of Contactin-1 precursor         | G.VSEEDKGFPIFEEQPINTIYPEESLEK.V     | 3 | 5.30 | 0.49 | -3.02 |
| IPI00029751 | Isoform 1 of Contactin-1 precursor         | H.SDGGDGVVSQVK.I                    | 2 | 3.90 | 0.28 | -3.16 |
| IPI00029751 | Isoform 1 of Contactin-1 precursor         | I.NSAQDAPSEAPTEVGK.V                | 2 | 4.33 | 0.45 | -2.78 |
| IPI00029751 | Isoform 1 of Contactin-1 precursor         | K.AFNKGDGPYSLVAVINSAQDAPSEAPTEVGK.V | 2 | 4.60 | 0.51 | -1.44 |
| IPI00029751 | Isoform 1 of Contactin-1 precursor         | K.AFNKGDGPYSLVAVINSAQDAPSEAPTEVGK.V | 3 | 6.51 | 0.57 | -2.78 |
| IPI00029751 | Isoform 1 of Contactin-1 precursor         | K.AFNKGDGPYSLVAVINSAQDAPSEAPTEVGK.V | 4 | 4.52 | 0.43 | -2.66 |
| IPI00029751 | Isoform 1 of Contactin-1 precursor         | K.AFNKGDGPYSLVAVINSAQDAPSEAPTEVGK.V | 5 | 2.79 | 0.16 | -1.25 |
| IPI00029751 | Isoform 1 of Contactin-1 precursor         | K.DAGIYYCLASNYYGM*VR.S              | 2 | 5.44 | 0.64 | -6.31 |
| IPI00029751 | Isoform 1 of Contactin-1 precursor         | K.DAGIYYCLASNYYGM*VR.S              | 3 | 5.41 | 0.51 | -4.89 |
| IPI00029751 | Isoform 1 of Contactin-1 precursor         | K.DAKTDPPIIEGNM*EAAR.A              | 2 | 3.84 | 0.41 | -3.77 |
| IPI00029751 | Isoform 1 of Contactin-1 precursor         | K.DAKTDPPIIEGNM*EAAR.A              | 3 | 4.72 | 0.18 | -2.84 |
| IPI00029751 | Isoform 1 of Contactin-1 precursor         | K.ENIHQR.N                          | 1 | 2.32 | 0.17 | 0.42  |
| IPI00029751 | Isoform 1 of Contactin-1 precursor         | K.FIPLIPER.T                        | 1 | 2.97 | 0.20 | -3.98 |
| IPI00029751 | Isoform 1 of Contactin-1 precursor         | K.FIPLIPER.T                        | 2 | 2.40 | 0.11 | -4.48 |
| IPI00029751 | Isoform 1 of Contactin-1 precursor         | K.GDGPYSLVAVINSAQDAPSEAPTEVGK.V     | 2 | 5.54 | 0.53 | -4.13 |
| IPI00029751 | Isoform 1 of Contactin-1 precursor         | K.GFGPIFEEQPINTIYPEESLEK.V          | 2 | 4.44 | 0.51 | -6.42 |
| IPI00029751 | Isoform 1 of Contactin-1 precursor         | K.GM*VLLCDPPYHFPDDL.SYR.W           | 2 | 4.37 | 0.58 | -3.90 |
| IPI00029751 | Isoform 1 of Contactin-1 precursor         | K.GM*VLLCDPPYHFPDDL.SYR.W           | 3 | 3.58 | 0.24 | -3.42 |
| IPI00029751 | Isoform 1 of Contactin-1 precursor         | K.GMVLLCDPPYHFPDDL.SYR.W            | 2 | 3.66 | 0.42 | -2.74 |
| IPI00029751 | Isoform 1 of Contactin-1 precursor         | K.HSIEVPIPR.D                       | 1 | 2.23 | 0.35 | -2.47 |
| IPI00029751 | Isoform 1 of Contactin-1 precursor         | K.HSIEVPIPR.D                       | 2 | 2.55 | 0.26 | -1.72 |
| IPI00029751 | Isoform 1 of Contactin-1 precursor         | K.HSIEVPIPRDGEYVVEVR.A              | 2 | 3.14 | 0.28 | -5.01 |
| IPI00029751 | Isoform 1 of Contactin-1 precursor         | K.HSIEVPIPRDGEYVVEVR.A              | 3 | 2.60 | 0.25 | -2.86 |
| IPI00029751 | Isoform 1 of Contactin-1 precursor         | K.HSIEVPIPRDGEYVVEVR.A              | 4 | 2.66 | 0.15 | -1.69 |
| IPI00029751 | Isoform 1 of Contactin-1 precursor         | K.IFNIQLEDEGIYECEAENIR.G            | 2 | 6.70 | 0.61 | -4.70 |
| IPI00029751 | Isoform 1 of Contactin-1 precursor         | K.IFNIQLEDEGIYECEAENIR.G            | 3 | 7.30 | 0.53 | -5.46 |
| IPI00029751 | Isoform 1 of Contactin-1 precursor         | K.IFNIQLEDEGIYECEAENIRGK.D          | 3 | 4.10 | 0.30 | -3.14 |
| IPI00029751 | Isoform 1 of Contactin-1 precursor         | K.ILALPTFEM*NPM*K.K                 | 2 | 3.94 | 0.42 | -4.24 |
| IPI00029751 | Isoform 1 of Contactin-1 precursor         | K.ILALPTFEM*NPM*K.K                 | 3 | 4.44 | 0.42 | -1.12 |
| IPI00029751 | Isoform 1 of Contactin-1 precursor         | K.ILALPTFEM*NPM*KK.K                | 2 | 2.34 | 0.21 | -1.95 |
| IPI00029751 | Isoform 1 of Contactin-1 precursor         | K.ILALPTFEMNPMK.K                   | 2 | 2.77 | 0.17 |       |
| IPI00029751 | Isoform 1 of Contactin-1 precursor         | K.IVESYQIR.Y                        | 1 | 2.41 | 0.16 | -2.56 |

|             |                                    |                                        |   |      |      |       |
|-------------|------------------------------------|----------------------------------------|---|------|------|-------|
| IPI00029751 | Isoform 1 of Contactin-1 precursor | K.IVESYQIR.Y                           | 2 | 3.21 | 0.24 | -1.44 |
| IPI00029751 | Isoform 1 of Contactin-1 precursor | K.KVTVTNPDTR.Y                         | 1 | 2.95 | 0.17 | -1.43 |
| IPI00029751 | Isoform 1 of Contactin-1 precursor | K.KVTVTNPDTR.Y                         | 2 | 3.06 | 0.33 | -2.74 |
| IPI00029751 | Isoform 1 of Contactin-1 precursor | K.NGYAYHKGELR.L                        | 2 | 3.40 | 0.42 | -2.79 |
| IPI00029751 | Isoform 1 of Contactin-1 precursor | K.TDGAAPNVAPSDVGGGGGR.N                | 2 | 4.30 | 0.50 | -2.88 |
| IPI00029751 | Isoform 1 of Contactin-1 precursor | K.TDGAAPNVAPSDVGGGGGR.N                | 3 | 3.88 | 0.41 | -2.35 |
| IPI00029751 | Isoform 1 of Contactin-1 precursor | K.TDPPHIEGNM*EAAR.A                    | 2 | 2.38 | 0.33 | -4.55 |
| IPI00029751 | Isoform 1 of Contactin-1 precursor | K.TDPPHIEGNM*EAAR.A                    | 3 | 2.82 | 0.33 | -2.11 |
| IPI00029751 | Isoform 1 of Contactin-1 precursor | K.TILSDDWK.D                           | 1 | 1.85 | 0.23 | -3.49 |
| IPI00029751 | Isoform 1 of Contactin-1 precursor | K.TILSDDWKDAKTDPPHIEGNM*EAAR.A         | 3 | 3.73 | 0.34 | -1.65 |
| IPI00029751 | Isoform 1 of Contactin-1 precursor | K.VKAFNNKGDGPYSLVAVINSAQDAPSEAPTEVGK.V | 3 | 5.40 | 0.40 | -3.93 |
| IPI00029751 | Isoform 1 of Contactin-1 precursor | K.VKAFNNKGDGPYSLVAVINSAQDAPSEAPTEVGK.V | 4 | 3.72 | 0.28 | -4.51 |
| IPI00029751 | Isoform 1 of Contactin-1 precursor | K.VLEPM*PSTAEISTSGAVLK.I               | 2 | 4.92 | 0.57 | -3.39 |
| IPI00029751 | Isoform 1 of Contactin-1 precursor | K.VLEPM*PSTAEISTSGAVLK.I               | 3 | 4.23 | 0.41 | -2.39 |
| IPI00029751 | Isoform 1 of Contactin-1 precursor | K.VLSSEISVHWEHVLEK.I                   | 2 | 4.49 | 0.33 | -4.44 |
| IPI00029751 | Isoform 1 of Contactin-1 precursor | K.VLSSEISVHWEHVLEK.I                   | 4 | 1.95 | 0.27 | -2.25 |
| IPI00029751 | Isoform 1 of Contactin-1 precursor | K.VLYRPDQHDGK.L                        | 2 | 3.46 | 0.43 | -3.29 |
| IPI00029751 | Isoform 1 of Contactin-1 precursor | K.VLYRPDQHDGK.L                        | 3 | 2.34 | 0.26 | -3.77 |
| IPI00029751 | Isoform 1 of Contactin-1 precursor | K.VLYRPDQHDGKLYSTHK.H                  | 3 | 3.41 | 0.23 | -3.38 |
| IPI00029751 | Isoform 1 of Contactin-1 precursor | K.VTVTNPDTR.Y                          | 2 | 3.47 | 0.35 | -3.99 |
| IPI00029751 | Isoform 1 of Contactin-1 precursor | K.YTIQTK.T                             | 1 | 2.16 | 0.11 | -1.94 |
| IPI00029751 | Isoform 1 of Contactin-1 precursor | L.VAVINSAQDAPSEAPTEVGK.V               | 2 | 6.50 | 0.61 | -3.45 |
| IPI00029751 | Isoform 1 of Contactin-1 precursor | L.VAVINSAQDAPSEAPTEVGK.V               | 3 | 4.24 | 0.37 | -4.56 |
| IPI00029751 | Isoform 1 of Contactin-1 precursor | N.SAQDAPSEAPTEVGK.V                    | 2 | 4.14 | 0.38 | -3.96 |
| IPI00029751 | Isoform 1 of Contactin-1 precursor | Q.DAPSEAPTEVGK.V                       | 2 | 3.07 | 0.26 | -2.63 |
| IPI00029751 | Isoform 1 of Contactin-1 precursor | R.AHSDGGDVVSQVK.I                      | 1 | 3.37 | 0.45 | -3.57 |
| IPI00029751 | Isoform 1 of Contactin-1 precursor | R.AHSDGGDVVSQVK.I                      | 2 | 4.26 | 0.60 | -4.41 |
| IPI00029751 | Isoform 1 of Contactin-1 precursor | R.AHSDGGDVVSQVK.I                      | 3 | 2.35 | 0.10 | -4.34 |
| IPI00029751 | Isoform 1 of Contactin-1 precursor | R.ASPFPVYK.W                           | 1 | 1.96 | 0.31 | -2.80 |
| IPI00029751 | Isoform 1 of Contactin-1 precursor | R.ATSVALTWSR.G                         | 1 | 2.00 | 0.14 | -3.13 |
| IPI00029751 | Isoform 1 of Contactin-1 precursor | R.ATSVALTWSR.G                         | 2 | 3.54 | 0.30 | -3.84 |
| IPI00029751 | Isoform 1 of Contactin-1 precursor | R.AVDLIPWM*EYEFR.V                     | 2 | 3.76 | 0.48 | -3.63 |
| IPI00029751 | Isoform 1 of Contactin-1 precursor | R.DGEYVVEVR.A                          | 1 | 2.60 | 0.18 | -3.49 |
| IPI00029751 | Isoform 1 of Contactin-1 precursor | R.DGEYVVEVR.A                          | 2 | 3.85 | 0.29 | -3.29 |
| IPI00029751 | Isoform 1 of Contactin-1 precursor | R.ELTITWAPLSR.E                        | 1 | 2.58 | 0.14 | -3.87 |
| IPI00029751 | Isoform 1 of Contactin-1 precursor | R.ELTITWAPLSR.E                        | 2 | 3.76 | 0.37 | -4.32 |
| IPI00029751 | Isoform 1 of Contactin-1 precursor | R.FVSQTNGNLYIANVEASDK.G                | 2 | 5.58 | 0.47 | -3.82 |
| IPI00029751 | Isoform 1 of Contactin-1 precursor | R.GEPSIPSNR.I                          | 2 | 1.72 | 0.07 | -1.71 |
| IPI00029751 | Isoform 1 of Contactin-1 precursor | R.GPPGPPGGLR.I                         | 1 | 2.67 | 0.21 | -1.32 |
| IPI00029751 | Isoform 1 of Contactin-1 precursor | R.GPPGPPGGLR.I                         | 2 | 2.81 | 0.19 | -0.40 |
| IPI00029751 | Isoform 1 of Contactin-1 precursor | R.GPPGPPGGLRIEDIR.A                    | 3 | 1.78 | 0.22 | -2.00 |
| IPI00029751 | Isoform 1 of Contactin-1 precursor | R.GSDNHSPISK.Y                         | 1 | 2.34 | 0.17 | -3.77 |

|             |                                    |                                          |   |      |      |       |
|-------------|------------------------------------|------------------------------------------|---|------|------|-------|
| IPI00029751 | Isoform 1 of Contactin-1 precursor | R.GSDNHSPISK.Y                           | 2 | 2.75 | 0.22 | -2.61 |
| IPI00029751 | Isoform 1 of Contactin-1 precursor | R.GSDNHSPISKYTIQTK.T                     | 2 | 3.14 | 0.28 | -3.80 |
| IPI00029751 | Isoform 1 of Contactin-1 precursor | R.IKTDGAAPNVAPSDVGGGGG.R                 | 2 | 4.76 | 0.34 | -3.40 |
| IPI00029751 | Isoform 1 of Contactin-1 precursor | R.IKTDGAAPNVAPSDVGGGGGR.N                | 2 | 5.38 | 0.54 | -3.07 |
| IPI00029751 | Isoform 1 of Contactin-1 precursor | R.IKTDGAAPNVAPSDVGGGGGR.N                | 3 | 3.38 | 0.41 | -1.32 |
| IPI00029751 | Isoform 1 of Contactin-1 precursor | R.KVLEPM*PSTAEISTSGAVLK.I                | 2 | 4.27 | 0.46 | -4.10 |
| IPI00029751 | Isoform 1 of Contactin-1 precursor | R.KVLEPM*PSTAEISTSGAVLK.I                | 3 | 4.35 | 0.35 | -4.11 |
| IPI00029751 | Isoform 1 of Contactin-1 precursor | R.LENLLPDTQYFIEVGACNSAGCGPPSDM*IEAFTKK.A | 3 | 4.51 | 0.41 | -5.26 |
| IPI00029751 | Isoform 1 of Contactin-1 precursor | R.LENLLPDTQYFIEVGACNSAGCGPPSDM*IEAFTKK.A | 4 | 5.14 | 0.42 | -4.91 |
| IPI00029751 | Isoform 1 of Contactin-1 precursor | R.LYDVTFENAGM*YQCIAENTYGAIYANAELK.I      | 3 | 6.34 | 0.54 | -4.40 |
| IPI00029751 | Isoform 1 of Contactin-1 precursor | R.LYDVTFENAGM*YQCIAENTYGAIYANAELK.I      | 4 | 5.31 | 0.41 | -4.23 |
| IPI00029751 | Isoform 1 of Contactin-1 precursor | R.M*NNGDVDLTSDR.Y                        | 1 | 2.01 | 0.24 | -4.44 |
| IPI00029751 | Isoform 1 of Contactin-1 precursor | R.M*NNGDVDLTSDR.Y                        | 2 | 4.16 | 0.30 | -6.15 |
| IPI00029751 | Isoform 1 of Contactin-1 precursor | R.M*NNGDVDLTSDRYSM*VGGNLVINNPDK.Q        | 3 | 5.64 | 0.54 | -3.35 |
| IPI00029751 | Isoform 1 of Contactin-1 precursor | R.M*NNGDVDLTSDRYSM*VGGNLVINNPDKQK.D      | 3 | 5.18 | 0.55 | -3.46 |
| IPI00029751 | Isoform 1 of Contactin-1 precursor | R.M*NNGDVDLTSDRYSM*VGGNLVINNPDKQK.D      | 4 | 5.10 | 0.47 | -0.93 |
| IPI00029751 | Isoform 1 of Contactin-1 precursor | R.NDGGIYTCFAENNR.G                       | 2 | 3.84 | 0.45 | -3.81 |
| IPI00029751 | Isoform 1 of Contactin-1 precursor | R.NFM*LDSNGELLIR.N                       | 2 | 4.95 | 0.47 | -6.88 |
| IPI00029751 | Isoform 1 of Contactin-1 precursor | R.NRELTITWAPLSR.E                        | 2 | 3.63 | 0.30 | -3.94 |
| IPI00029751 | Isoform 1 of Contactin-1 precursor | R.NRELTITWAPLSR.E                        | 3 | 4.14 | 0.23 | -3.17 |
| IPI00029751 | Isoform 1 of Contactin-1 precursor | R.RYGHGVSEEDKGFPIFEEQPINTIYPEESLEGK.V    | 3 | 6.66 | 0.61 | -4.84 |
| IPI00029751 | Isoform 1 of Contactin-1 precursor | R.RYGHGVSEEDKGFPIFEEQPINTIYPEESLEGK.V    | 4 | 4.51 | 0.42 | -4.21 |
| IPI00029751 | Isoform 1 of Contactin-1 precursor | R.RYGHGVSEEDKGFPIFEEQPINTIYPEESLEGK.V    | 5 | 3.74 | 0.28 | -5.48 |
| IPI00029751 | Isoform 1 of Contactin-1 precursor | R.STEATLSFGYLDPPPEERPEVR.V               | 2 | 4.04 | 0.44 | -2.76 |
| IPI00029751 | Isoform 1 of Contactin-1 precursor | R.STEATLSFGYLDPPPEERPEVR.V               | 3 | 5.04 | 0.54 | -7.39 |
| IPI00029751 | Isoform 1 of Contactin-1 precursor | R.STEATLSFGYLDPPPEERPEVR.V               | 4 | 3.77 | 0.29 | -2.07 |
| IPI00029751 | Isoform 1 of Contactin-1 precursor | R.TTKPYPADIVVQFK.D                       | 2 | 4.16 | 0.50 | -3.74 |
| IPI00029751 | Isoform 1 of Contactin-1 precursor | R.TTKPYPADIVVQFK.D                       | 3 | 5.11 | 0.40 | -2.87 |
| IPI00029751 | Isoform 1 of Contactin-1 precursor | R.VQVTSQEYSAR.L                          | 1 | 2.58 | 0.35 | -4.27 |
| IPI00029751 | Isoform 1 of Contactin-1 precursor | R.VQVTSQEYSAR.L                          | 2 | 4.22 | 0.40 | -4.15 |
| IPI00029751 | Isoform 1 of Contactin-1 precursor | R.VVATNTLGR.G                            | 1 | 1.78 | 0.14 | -2.37 |
| IPI00029751 | Isoform 1 of Contactin-1 precursor | R.VVATNTLGR.G                            | 2 | 2.59 | 0.31 | -2.51 |
| IPI00029751 | Isoform 1 of Contactin-1 precursor | R.VVATNTLGRGEPSIPSNR.I                   | 2 | 3.17 | 0.15 | -3.35 |
| IPI00029751 | Isoform 1 of Contactin-1 precursor | R.VVATNTLGRGEPSIPSNR.I                   | 3 | 4.06 | 0.19 | -3.63 |
| IPI00029751 | Isoform 1 of Contactin-1 precursor | R.WLLNEFPVFITM*DK.R                      | 2 | 5.48 | 0.46 | -6.56 |
| IPI00029751 | Isoform 1 of Contactin-1 precursor | R.WLLNEFPVFITM*DK.R                      | 3 | 5.36 | 0.40 | -3.05 |
| IPI00029751 | Isoform 1 of Contactin-1 precursor | R.WLLNEFPVFITM*DKR.R                     | 2 | 4.32 | 0.33 | -5.95 |
| IPI00029751 | Isoform 1 of Contactin-1 precursor | R.WLLNEFPVFITM*DKR.R                     | 3 | 3.64 | 0.37 | -2.34 |
| IPI00029751 | Isoform 1 of Contactin-1 precursor | R.WLLNEFPVFITMDK.R                       | 2 | 4.80 | 0.39 | -4.90 |
| IPI00029751 | Isoform 1 of Contactin-1 precursor | R.YGHGVSEEDKGFPIFEEQPINTIYPEESLEGK.V     | 3 | 7.58 | 0.60 | -4.26 |
| IPI00029751 | Isoform 1 of Contactin-1 precursor | R.YGHGVSEEDKGFPIFEEQPINTIYPEESLEGK.V     | 4 | 5.02 | 0.42 | -3.43 |
| IPI00029751 | Isoform 1 of Contactin-1 precursor | R.YSM*VGGNLVINNPDK.Q                     | 2 | 5.07 | 0.49 | -3.78 |

|             |                                                      |                                             |   |      |      |       |
|-------------|------------------------------------------------------|---------------------------------------------|---|------|------|-------|
| IPI00029751 | Isoform 1 of Contactin-1 precursor                   | R.YSM*VGGNLVINNPDKQK.D                      | 2 | 5.03 | 0.50 | -3.22 |
| IPI00029751 | Isoform 1 of Contactin-1 precursor                   | R.YSM*VGGNLVINNPDKQK.D                      | 3 | 3.61 | 0.37 | -2.29 |
| IPI00029751 | Isoform 1 of Contactin-1 precursor                   | R.YTCTAQTIVDNSSASADLVVR.G                   | 2 | 6.33 | 0.65 | -4.56 |
| IPI00029751 | Isoform 1 of Contactin-1 precursor                   | R.YTCTAQTIVDNSSASADLVVR.G                   | 3 | 4.88 | 0.50 | -3.22 |
| IPI00029751 | Isoform 1 of Contactin-1 precursor                   | R.YVHKDETM*SPST.A                           | 2 | 3.01 | 0.45 | -4.66 |
| IPI00029751 | Isoform 1 of Contactin-1 precursor                   | R.YVHKDETM*SPSTAFQVK.V                      | 2 | 5.22 | 0.52 | -2.74 |
| IPI00029751 | Isoform 1 of Contactin-1 precursor                   | R.YVHKDETM*SPSTAFQVK.V                      | 3 | 3.25 | 0.24 | -3.50 |
| IPI00029751 | Isoform 1 of Contactin-1 precursor                   | S.DGGDGVVSQVK.I                             | 2 | 3.84 | 0.39 | -1.88 |
| IPI00029751 | Isoform 1 of Contactin-1 precursor                   | S.EEDKGFQPIFEEQPINTIYPEESLEGK.V             | 3 | 4.04 | 0.28 | -2.88 |
| IPI00029751 | Isoform 1 of Contactin-1 precursor                   | V.INSAQDAPSEAPTEVGVK.V                      | 2 | 5.26 | 0.47 | -6.39 |
| IPI00029751 | Isoform 1 of Contactin-1 precursor                   | W.AAHDKEEAANRVQVTSQEYSAR.L                  | 3 | 4.08 | 0.42 | -4.18 |
| IPI00029756 | Proto-oncogene tyrosine-protein kinase MER precursor | K.INNEEIVSDPIYIEVQGLPHFTK.Q                 | 3 | 4.37 | 0.38 | -3.25 |
| IPI00029756 | Proto-oncogene tyrosine-protein kinase MER precursor | R.GGVGPFSDPVK.I                             | 2 | 2.82 | 0.23 | -2.13 |
| IPI00029817 | Sialidase-1 precursor                                | R.GTLFAFAEAR.K                              | 2 | 2.91 | 0.12 | -0.53 |
| IPI00029817 | Sialidase-1 precursor                                | R.NHYTESISVAK.I                             | 2 | 2.66 | 0.31 | -2.44 |
| IPI00029817 | Sialidase-1 precursor                                | R.QIGSVDTFRITLITATPR.G                      | 3 | 2.78 | 0.18 | -1.39 |
| IPI00029819 | Neurogenic locus notch homolog protein 3 precursor   | R.VASFYCACPM*GK.T                           | 2 | 3.16 | 0.40 | -3.13 |
| IPI00029863 | SERPINF2 protein                                     | K.EQQDSPGNKDFLQSLK.G                        | 2 | 2.83 | 0.30 | -3.02 |
| IPI00029863 | SERPINF2 protein                                     | K.FDPSLTQR.D                                | 2 | 2.28 | 0.12 |       |
| IPI00029863 | SERPINF2 protein                                     | K.GFPIKEDFLEQSEQLFGAKPVSLTGK.Q              | 3 | 4.01 | 0.45 | -3.17 |
| IPI00029863 | SERPINF2 protein                                     | K.GFPIKEDFLEQSEQLFGAKPVSLTGKQEDDLANINQWVK.E | 4 | 3.27 | 0.18 | -2.19 |
| IPI00029863 | SERPINF2 protein                                     | K.HQM*DLVATLSQLGLQELFQAPDLR.G               | 3 | 2.66 | 0.14 | -3.78 |
| IPI00029863 | SERPINF2 protein                                     | K.LGNQEPGGQTALK.S                           | 1 | 2.44 | 0.13 | -3.65 |
| IPI00029863 | SERPINF2 protein                                     | K.LGNQEPGGQTALK.S                           | 2 | 3.62 | 0.20 | -3.55 |
| IPI00029863 | SERPINF2 protein                                     | K.LGNQEPGGQTALKSPPGVCSR.D                   | 2 | 5.50 | 0.48 |       |
| IPI00029863 | SERPINF2 protein                                     | K.LGNQEPGGQTALKSPPGVCSR.D                   | 3 | 3.32 | 0.17 |       |
| IPI00029863 | SERPINF2 protein                                     | K.QEDDLANINQWVK.E                           | 2 | 2.91 | 0.16 |       |
| IPI00029863 | SERPINF2 protein                                     | K.SPPGVCSRDPTEQTHR.L                        | 3 | 3.55 | 0.20 |       |
| IPI00029863 | SERPINF2 protein                                     | P.NQEVSPLTLLK.L                             | 2 | 3.40 | 0.24 | -2.50 |
| IPI00029863 | SERPINF2 protein                                     | Q.DSPGNKDFLQSLK.G                           | 2 | 2.96 | 0.17 | -0.42 |
| IPI00029863 | SERPINF2 protein                                     | Q.LTSGPNQEQVSPLTLLK.L                       | 2 | 3.38 | 0.30 | -2.28 |
| IPI00029863 | SERPINF2 protein                                     | R.DSFHLDEQFTVPVEM*M*QAR.T                   | 2 | 3.76 | 0.39 | -4.02 |
| IPI00029863 | SERPINF2 protein                                     | R.DSFHLDEQFTVPVEM*M*QAR.T                   | 3 | 3.95 | 0.28 | -3.51 |
| IPI00029863 | SERPINF2 protein                                     | R.DSFHLDEQFTVPVEMM*QAR.T                    | 2 | 4.23 | 0.10 |       |
| IPI00029863 | SERPINF2 protein                                     | R.DSFHLDEQFTVPVEMMQAR.T                     | 2 | 6.02 | 0.40 |       |
| IPI00029863 | SERPINF2 protein                                     | R.ELKEQQDSPGNKDFLQSLK.G                     | 2 | 4.94 | 0.39 | -3.43 |
| IPI00029863 | SERPINF2 protein                                     | R.ELKEQQDSPGNKDFLQSLK.G                     | 3 | 4.20 | 0.31 |       |
| IPI00029863 | SERPINF2 protein                                     | R.ELKEQQDSPGNKDFLQSLKGFPR.G                 | 3 | 3.34 | 0.18 |       |
| IPI00029863 | SERPINF2 protein                                     | R.GDKLFGPDLK.L                              | 1 | 2.54 | 0.27 | -2.73 |



|             |                                                                              |                                         |   |      |      |       |
|-------------|------------------------------------------------------------------------------|-----------------------------------------|---|------|------|-------|
| IPI00029863 | SERPINF2 protein                                                             | R.GDKLFGPDLK.L                          | 2 | 2.63 | 0.19 | -2.55 |
| IPI00029863 | SERPINF2 protein                                                             | R.LCQDLGPGAFR.L                         | 2 | 3.79 | 0.36 | -7.07 |
| IPI00029863 | SERPINF2 protein                                                             | R.LQQVLHAGSGPCLPHLLSR.L                 | 2 | 6.09 | 0.41 |       |
| IPI00029863 | SERPINF2 protein                                                             | R.LQQVLHAGSGPCLPHLLSR.L                 | 3 | 4.06 | 0.31 |       |
| IPI00029863 | SERPINF2 protein                                                             | R.NKFDPSLTQR.D                          | 2 | 2.34 | 0.13 | -2.02 |
| IPI00029863 | SERPINF2 protein                                                             | R.QLTSGPNQEQVSPLTLLK.L                  | 2 | 5.01 | 0.46 | -2.40 |
| IPI00029863 | SERPINF2 protein                                                             | R.QLTSGPNQEQVSPLTLLK.L                  | 3 | 3.22 | 0.19 | -1.61 |
| IPI00029863 | SERPINF2 protein                                                             | R.WFLEQPEIQVAHFPPK.N                    | 2 | 4.75 | 0.37 | -2.59 |
| IPI00029863 | SERPINF2 protein                                                             | R.WFLEQPEIQVAHFPPK.N                    | 3 | 2.67 | 0.18 | -2.80 |
| IPI00029928 | Elastin                                                                      | K.LPYGYGPGGVAGAAGK.A                    | 2 | 3.69 | 0.26 | -2.64 |
| IPI00029928 | Elastin                                                                      | K.YGVGTAAAAAAK.A                        | 2 | 2.43 | 0.13 | -1.27 |
| IPI00029928 | Elastin                                                                      | R.FPGVGVLPGVPTGAGVKPK.A                 | 3 | 3.72 | 0.35 | -2.31 |
| IPI00029997 | 6-phosphogluconolactonase                                                    | R.ELPAAVAPAGPASLAR.W                    | 2 | 3.60 | 0.39 | -2.74 |
| IPI00029997 | 6-phosphogluconolactonase                                                    | R.ILEDQEENPLPAALVQPHTGK.L               | 3 | 3.94 | 0.32 | -2.52 |
| IPI00029997 | 6-phosphogluconolactonase                                                    | R.LPIPESQVITINPELPVEEAAEDYAK.K          | 3 | 4.61 | 0.30 | -4.31 |
| IPI00029997 | 6-phosphogluconolactonase                                                    | R.TVIFVATGEGK.A                         | 2 | 2.35 | 0.19 | -2.78 |
| IPI00029997 | 6-phosphogluconolactonase                                                    | R.VTLTLPVLNAAR.T                        | 2 | 3.69 | 0.43 | -3.30 |
| IPI00030009 | Isoform A of Bifunctional 3'-phosphoadenosine 5'-phosphosulfate synthetase 2 | K.KDLYEPTHGGKVLSMAPGLTSVEIIPFRVAAYNK.A  | 3 | 1.96 | 0.23 | -4.20 |
| IPI00030037 | Agouti-signaling protein precursor                                           | K.LRDDRSLRSNSSVNLLDVPSVSIVALNKKSKQIGR.K | 3 | 3.43 | 0.09 |       |
| IPI00030075 | Fibroleukin precursor                                                        | K.EVQNLKEIVNSLKK.S                      | 2 | 2.92 | 0.10 | -3.41 |
| IPI00030075 | Fibroleukin precursor                                                        | K.EVQNLKEIVNSLKK.S                      | 3 | 1.73 | 0.15 | -2.36 |
| IPI00030075 | Fibroleukin precursor                                                        | K.LNLVNM*NNIENYVDSK.V                   | 2 | 4.58 | 0.51 | -3.02 |
| IPI00030075 | Fibroleukin precursor                                                        | K.LQADDNGDPGR.N                         | 2 | 3.01 | 0.16 | -2.57 |
| IPI00030075 | Fibroleukin precursor                                                        | R.ELESEVNKLSSSELK.N                     | 2 | 3.93 | 0.26 | -1.90 |
| IPI00030075 | Fibroleukin precursor                                                        | R.IEEVFKEVQNLK.E                        | 2 | 4.89 | 0.15 | -2.60 |
| IPI00030075 | Fibroleukin precursor                                                        | R.IEEVFKEVQNLK.E                        | 3 | 3.36 | 0.14 | -1.44 |
| IPI00030075 | Fibroleukin precursor                                                        | R.IEEVFKEVQNLKEIVNSLKK.S                | 3 | 5.10 | 0.39 | -3.29 |
| IPI00030075 | Fibroleukin precursor                                                        | R.IEEVFKEVQNLKEIVNSLKK.S                | 4 | 4.01 | 0.42 | -3.17 |
| IPI00030075 | Fibroleukin precursor                                                        | R.VRELESEVNKLSSSELK.N                   | 3 | 2.72 | 0.07 | -0.59 |
| IPI00030075 | Fibroleukin precursor                                                        | R.VRELESEVNKLSSSELK.N                   | 4 | 3.29 | 0.38 | 0.03  |
| IPI00030111 | Growth/differentiation factor 11 precursor                                   | K.IPGM*VVDR.C                           | 2 | 2.30 | 0.24 | -3.33 |
| IPI00030111 | Growth/differentiation factor 11 precursor                                   | K.M*SPINM*LYFNDK.Q                      | 2 | 3.54 | 0.40 | -1.82 |
| IPI00030111 | Growth/differentiation factor 11 precursor                                   | K.YPHTHLVQQANPR.G                       | 2 | 3.02 | 0.41 | -3.79 |
| IPI00030205 | Ig kappa chain V-III region HAH precursor                                    | G.EIVLTQSPGTLTSLSPGER.A                 | 2 | 6.33 | 0.22 |       |
| IPI00030205 | Ig kappa chain V-III region HAH precursor                                    | R.ASQSVSSSYLAWYQQKPGQAPR.L              | 2 | 5.52 | 0.40 |       |
| IPI00030205 | Ig kappa chain V-III region HAH precursor                                    | R.ASQSVSSSYLAWYQQKPGQAPR.L              | 3 | 3.59 | 0.29 |       |
| IPI00030205 | Ig kappa chain V-III region HAH precursor                                    | R.ATGIPDRFSGSGSGTDFLTISR.L              | 2 | 4.84 | 0.38 |       |
| IPI00030205 | Ig kappa chain V-III region HAH precursor                                    | R.ATGIPDRFSGSGSGTDFLTISR.L              | 3 | 3.97 | 0.23 |       |
| IPI00030205 | Ig kappa chain V-III region HAH precursor                                    | R.FSGSGSGTDFLTISR.L                     | 1 | 2.55 | 0.22 |       |
| IPI00030205 | Ig kappa chain V-III region HAH precursor                                    | R.FSGSGSGTDFLTISR.L                     | 2 | 4.49 | 0.53 |       |
| IPI00030205 | Ig kappa chain V-III region HAH precursor                                    | R.LLIYGASSR.A                           | 2 | 3.35 | 0.21 |       |

|             |                                                                       |                                 |   |      |      |       |
|-------------|-----------------------------------------------------------------------|---------------------------------|---|------|------|-------|
| IPI00030255 | Procollagen-lysine,2-oxoglutarate 5-dioxygenase 3 precursor           | K.LSLNLDHK.S                    | 2 | 2.87 | 0.21 | -2.65 |
| IPI00030255 | Procollagen-lysine,2-oxoglutarate 5-dioxygenase 3 precursor           | K.LVGPEEALSPGEAR.D              | 2 | 3.40 | 0.36 | -3.82 |
| IPI00030255 | Procollagen-lysine,2-oxoglutarate 5-dioxygenase 3 precursor           | K.LWSNFWGALSPDEYYAR.S           | 2 | 3.79 | 0.19 | -3.75 |
| IPI00030255 | Procollagen-lysine,2-oxoglutarate 5-dioxygenase 3 precursor           | K.QVGYEDQWLQLLR.T               | 2 | 2.98 | 0.19 | -6.01 |
| IPI00030255 | Procollagen-lysine,2-oxoglutarate 5-dioxygenase 3 precursor           | R.AVM*NFVVR.Y                   | 2 | 2.29 | 0.15 | 0.99  |
| IPI00030255 | Procollagen-lysine,2-oxoglutarate 5-dioxygenase 3 precursor           | R.IFQNLNGALDEVVLK.F             | 2 | 4.36 | 0.20 | -3.25 |
| IPI00030255 | Procollagen-lysine,2-oxoglutarate 5-dioxygenase 3 precursor           | R.IFQNLNGALDEVVLKFDR.N          | 3 | 2.61 | 0.17 | -5.63 |
| IPI00030255 | Procollagen-lysine,2-oxoglutarate 5-dioxygenase 3 precursor           | R.IRNVAYDTLPVVHGNPPTK.L         | 3 | 4.78 | 0.37 | -3.96 |
| IPI00030255 | Procollagen-lysine,2-oxoglutarate 5-dioxygenase 3 precursor           | R.IRNVAYDTLPVVHGNPPTK.L         | 4 | 2.85 | 0.10 | -3.41 |
| IPI00030255 | Procollagen-lysine,2-oxoglutarate 5-dioxygenase 3 precursor           | R.LAGGYENVPTVDIHM*K.Q           | 2 | 3.84 | 0.33 | -2.25 |
| IPI00030255 | Procollagen-lysine,2-oxoglutarate 5-dioxygenase 3 precursor           | R.LAGGYENVPTVDIHM*K.Q           | 3 | 2.56 | 0.10 | -1.14 |
| IPI00030255 | Procollagen-lysine,2-oxoglutarate 5-dioxygenase 3 precursor           | R.LLFSAESFCWPEWGLAEQYPEVGTGKR.F | 3 | 3.25 | 0.20 | -1.73 |
| IPI00030255 | Procollagen-lysine,2-oxoglutarate 5-dioxygenase 3 precursor           | R.LYLDPGLR.E                    | 2 | 2.21 | 0.06 | -1.99 |
| IPI00030255 | Procollagen-lysine,2-oxoglutarate 5-dioxygenase 3 precursor           | R.SEDYVELVQR.K                  | 2 | 2.76 | 0.13 | -3.48 |
| IPI00030255 | Procollagen-lysine,2-oxoglutarate 5-dioxygenase 3 precursor           | R.TLGLGEEWR.G                   | 2 | 2.82 | 0.18 | -0.73 |
| IPI00030255 | Procollagen-lysine,2-oxoglutarate 5-dioxygenase 3 precursor           | R.YDCVISSPR.K                   | 2 | 3.32 | 0.35 | -2.43 |
| IPI00030319 | Forkhead box protein F2                                               | K.SAGGGGAGAGSGGAKKASSGLR.R      | 2 | 2.56 | 0.24 |       |
| IPI00030352 | Isoform 2 of Growth inhibition and differentiation-related protein 88 | K.EKQKESLSQKEVFK.D              | 2 | 1.77 | 0.19 |       |
| IPI00030431 | Isoform 1 of Anthrax toxin receptor 1 precursor                       | R.ASEQIYYENR.Q                  | 2 | 2.53 | 0.20 | -1.67 |
| IPI00030431 | Isoform 1 of Anthrax toxin receptor 1 precursor                       | R.M*SFIVFSTR.G                  | 2 | 3.10 | 0.25 | -0.36 |
| IPI00030634 | Isoform 1 of Gamma-glutamyltransferase 4 precursor                    | K.GLHEAHQLYGR.L                 | 3 | 2.67 | 0.29 | -6.13 |
| IPI00030634 | Isoform 1 of Gamma-glutamyltransferase 4 precursor                    | R.LHPDLQSNLLQVDSEFTEEEIEFLEAR.G | 3 | 5.15 | 0.43 | -3.54 |

|             |                                                         |                                       |   |      |      |       |
|-------------|---------------------------------------------------------|---------------------------------------|---|------|------|-------|
| IPI00030706 | Activator of 90 kDa heat shock protein ATPase homolog 1 | R.VFTTQELVQAFTHAPATLEADR.G            | 3 | 2.90 | 0.22 | -5.36 |
| IPI00030739 | Apolipoprotein M                                        | K.CVEEFKSLTSCLDLSDK.A                 | 2 | 3.58 | 0.30 |       |
| IPI00030739 | Apolipoprotein M                                        | K.SLTSCLDLSDK.A                       | 1 | 2.24 | 0.19 |       |
| IPI00030739 | Apolipoprotein M                                        | K.SLTSCLDLSDK.A                       | 2 | 2.49 | 0.16 |       |
| IPI00030739 | Apolipoprotein M                                        | K.WIYHLTEGSTDLR.T                     | 2 | 3.75 | 0.33 |       |
| IPI00030739 | Apolipoprotein M                                        | K.WIYHLTEGSTDLR.T                     | 3 | 3.21 | 0.22 |       |
| IPI00030741 | Uncharacterized protein C21orf13                        | K.GSEEPQSK.E                          | 2 | 1.67 | 0.19 |       |
| IPI00030757 | Isoform LpNPI of ADAMTS-2 precursor                     | R.RPPTSPPLGGPQALDTGASLDSLDSLRSR.A     | 3 | 5.56 | 0.53 | 0.34  |
| IPI00030847 | Transmembrane 9 superfamily member 3 precursor          | K.SISHYHETLGEALQGVELEFSGLDIK.F        | 3 | 2.93 | 0.23 | -4.06 |
| IPI00030847 | Transmembrane 9 superfamily member 3 precursor          | K.SISHYHETLGEALQGVELEFSGLDIK.F        | 4 | 3.08 | 0.15 | -3.36 |
| IPI00030847 | Transmembrane 9 superfamily member 3 precursor          | K.YFSLPFCVGSK.K                       | 2 | 2.42 | 0.20 | -2.45 |
| IPI00030847 | Transmembrane 9 superfamily member 3 precursor          | R.DAFVYAIK.N                          | 1 | 2.09 | 0.10 | -2.10 |
| IPI00030871 | Pantetheinase precursor                                 | R.FGQTPVQER.L                         | 2 | 2.48 | 0.15 | -1.74 |
| IPI00030871 | Pantetheinase precursor                                 | R.NLDILEGAITSAADQGAHIIVTPEDAIYGNFNR.D | 3 | 7.16 | 0.63 | -4.47 |
| IPI00030871 | Pantetheinase precursor                                 | R.YQYNTDVVFDSQGK.L                    | 2 | 4.39 | 0.49 | -1.08 |
| IPI00030876 | diaphanous 1 isoform 2                                  | R.VQLNVFDEQGEEDSYDLK.G                | 2 | 5.22 | 0.54 | -4.47 |
| IPI00030877 | 15 kDa selenoprotein isoform 1 precursor                | K.LGRFPQVQAFVR.S                      | 3 | 3.35 | 0.11 | -1.38 |
| IPI00030882 | Isoform Flop of Glutamate receptor 2 precursor          | R.DKVNDIVDQVITIGK.H                   | 2 | 4.42 | 0.50 | -1.76 |
| IPI00030882 | Isoform Flop of Glutamate receptor 2 precursor          | R.DKVNDIVDQVITIGK.H                   | 3 | 4.44 | 0.41 | -3.82 |
| IPI00030882 | Isoform Flop of Glutamate receptor 2 precursor          | R.VGM*VQFSTSEFR.L                     | 2 | 3.57 | 0.30 | -3.74 |
| IPI00030882 | Isoform Flop of Glutamate receptor 2 precursor          | S.NSIQIGGLFPR.G                       | 2 | 3.61 | 0.31 | -2.35 |
| IPI00030887 | Tyrosine-protein kinase receptor TYRO3 precursor        | K.DGAVVQNLDQLYIPVSEQHWIGFLSLK.S       | 3 | 6.08 | 0.43 | -7.46 |
| IPI00030887 | Tyrosine-protein kinase receptor TYRO3 precursor        | K.GLAPASAPQNLHAIR.T                   | 2 | 3.59 | 0.37 | -3.95 |
| IPI00030887 | Tyrosine-protein kinase receptor TYRO3 precursor        | K.GLAPASAPQNLHAIR.T                   | 3 | 2.08 | 0.27 | -2.74 |
| IPI00030887 | Tyrosine-protein kinase receptor TYRO3 precursor        | R.CANALGSPYADWVPFQTK.G                | 2 | 5.09 | 0.53 | -4.78 |
| IPI00030887 | Tyrosine-protein kinase receptor TYRO3 precursor        | R.TDSGLILEWEEVIPEAPLEGPLGPYK.L        | 2 | 3.56 | 0.32 | -2.50 |
| IPI00030887 | Tyrosine-protein kinase receptor TYRO3 precursor        | R.TDSGLILEWEEVIPEAPLEGPLGPYK.L        | 3 | 5.13 | 0.44 | -4.28 |
| IPI00030887 | Tyrosine-protein kinase receptor TYRO3 precursor        | W.LTVEGVFFFTVEPK.D                    | 2 | 3.54 | 0.30 | -0.99 |
| IPI00030887 | Tyrosine-protein kinase receptor TYRO3 precursor        | W.SQPLVSSHDR.A                        | 2 | 3.56 | 0.34 | -0.96 |

|             |                                                                 |                                            |   |      |      |       |
|-------------|-----------------------------------------------------------------|--------------------------------------------|---|------|------|-------|
| IPI00030919 | Mitogen-activated protein kinase kinase 1-interacting protein 1 | K.KLPSVEGLHAIVVSDRDGVPVIK.V                | 3 | 2.79 | 0.14 | -3.35 |
| IPI00031005 | Protein kinase-like protein SgK196                              | K.IPDISSFLLGHIEGSDM*VR.F                   | 3 | 2.33 | 0.06 | -1.88 |
| IPI00031008 | Isoform 1 of Tenascin precursor                                 | R.TAHISGLPPSTDFIVYLSGLAPSIR.T              | 3 | 2.32 | 0.15 | -2.28 |
| IPI00031019 | Cystatin-8 precursor                                            | R.SDCRKPLSTNEICAIQENSKLKR.K                | 3 | 3.59 | 0.05 |       |
| IPI00031030 | Isoform 1 of Amyloid-like protein 2 precursor                   | A.ANAGTGFAVAEPQIAM*FCGK.L                  | 2 | 5.32 | 0.52 | -3.16 |
| IPI00031030 | Isoform 1 of Amyloid-like protein 2 precursor                   | A.ANAGTGFAVAEPQIAM*FCGK.L                  | 3 | 4.62 | 0.16 | -2.12 |
| IPI00031030 | Isoform 1 of Amyloid-like protein 2 precursor                   | A.GYIEALAAANAGTGFAVAEPQIAM*FCGK.L          | 2 | 3.74 | 0.40 | -6.23 |
| IPI00031030 | Isoform 1 of Amyloid-like protein 2 precursor                   | A.GYIEALAAANAGTGFAVAEPQIAM*FCGK.L          | 3 | 6.12 | 0.45 | -3.89 |
| IPI00031030 | Isoform 1 of Amyloid-like protein 2 precursor                   | A.LAGYIEALAAANAGTGFAVAEPQIAM*FCGK.L        | 3 | 6.23 | 0.44 | -5.90 |
| IPI00031030 | Isoform 1 of Amyloid-like protein 2 precursor                   | E.ALAANAGTGFAVAEPQIAM*FCGK.L               | 2 | 5.93 | 0.59 | -3.35 |
| IPI00031030 | Isoform 1 of Amyloid-like protein 2 precursor                   | E.ALAANAGTGFAVAEPQIAM*FCGK.L               | 3 | 5.30 | 0.51 | -2.92 |
| IPI00031030 | Isoform 1 of Amyloid-like protein 2 precursor                   | K.ALEKEAASEK.Q                             | 2 | 2.73 | 0.21 | -2.34 |
| IPI00031030 | Isoform 1 of Amyloid-like protein 2 precursor                   | K.ALEKEAASEKQQLVETHLAR.V                   | 3 | 5.21 | 0.40 | -2.90 |
| IPI00031030 | Isoform 1 of Amyloid-like protein 2 precursor                   | K.ALEKEAASEKQQLVETHLAR.V                   | 4 | 3.10 | 0.29 | -1.92 |
| IPI00031030 | Isoform 1 of Amyloid-like protein 2 precursor                   | K.ALEKEAASEKQQLVETHLAR.V                   | 5 | 2.75 | 0.23 | -2.01 |
| IPI00031030 | Isoform 1 of Amyloid-like protein 2 precursor                   | K.AVCSQEAM*TGPCR.A                         | 2 | 3.91 | 0.40 | -3.29 |
| IPI00031030 | Isoform 1 of Amyloid-like protein 2 precursor                   | K.CLVGEFVSDVLLVPEK.C                       | 2 | 4.60 | 0.48 | -5.30 |
| IPI00031030 | Isoform 1 of Amyloid-like protein 2 precursor                   | K.CLVGEFVSDVLLVPEK.C                       | 3 | 3.67 | 0.27 | -3.27 |
| IPI00031030 | Isoform 1 of Amyloid-like protein 2 precursor                   | K.EAASEKQQLVETHLAR.V                       | 3 | 4.39 | 0.39 | -4.28 |
| IPI00031030 | Isoform 1 of Amyloid-like protein 2 precursor                   | K.EAQLTQGM*TLYSYGM*LLPCGVDQFHGTEYVCCPQTK.I | 3 | 5.51 | 0.55 | -3.23 |
| IPI00031030 | Isoform 1 of Amyloid-like protein 2 precursor                   | K.EAQLTQGM*TLYSYGM*LLPCGVDQFHGTEYVCCPQTK.I | 4 | 4.11 | 0.38 | -3.55 |
| IPI00031030 | Isoform 1 of Amyloid-like protein 2 precursor                   | K.EEVLQYQCQEM*YPELQITNVM*EANQR.V           | 3 | 5.55 | 0.51 | -4.59 |
| IPI00031030 | Isoform 1 of Amyloid-like protein 2 precursor                   | K.EM*IFNAER.V                              | 2 | 2.35 | 0.15 | -3.12 |
| IPI00031030 | Isoform 1 of Amyloid-like protein 2 precursor                   | K.GSGVGEQDGLIGAEK.V                        | 2 | 4.59 | 0.42 | -4.76 |
| IPI00031030 | Isoform 1 of Amyloid-like protein 2 precursor                   | K.GSGVGEQDGLIGAEK.V                        | 2 | 3.42 | 0.29 | -4.25 |
| IPI00031030 | Isoform 1 of Amyloid-like protein 2 precursor                   | K.GSGVGEQDGLIGAEK.V                        | 3 | 2.84 | 0.32 | -2.17 |
| IPI00031030 | Isoform 1 of Amyloid-like protein 2 precursor                   | K.IIGSVSK.E                                | 1 | 1.39 | 0.08 | -1.40 |
| IPI00031030 | Isoform 1 of Amyloid-like protein 2 precursor                   | K.KGSGVGEQDGLIGAEK.V                       | 2 | 5.35 | 0.34 | -3.07 |
| IPI00031030 | Isoform 1 of Amyloid-like protein 2 precursor                   | K.LNM*HVNIQTGK.W                           | 2 | 3.79 | 0.39 | -2.81 |
| IPI00031030 | Isoform 1 of Amyloid-like protein 2 precursor                   | K.LNM*HVNIQTGKWEPTDPTGTK.S                 | 4 | 3.20 | 0.18 | -2.52 |
| IPI00031030 | Isoform 1 of Amyloid-like protein 2 precursor                   | K.NKVDENM*VIDETL.D                         | 2 | 3.37 | 0.32 | -4.22 |
| IPI00031030 | Isoform 1 of Amyloid-like protein 2 precursor                   | K.QQLVETHLAR.V                             | 1 | 1.45 | 0.13 | -4.76 |
| IPI00031030 | Isoform 1 of Amyloid-like protein 2 precursor                   | K.QQLVETHLAR.V                             | 2 | 1.90 | 0.09 | -3.57 |
| IPI00031030 | Isoform 1 of Amyloid-like protein 2 precursor                   | K.SCFETKEEVLQYQCQEM*YPELQITNVM*EANQR.V     | 3 | 5.95 | 0.54 | -4.11 |
| IPI00031030 | Isoform 1 of Amyloid-like protein 2 precursor                   | K.SCFETKEEVLQYQCQEM*YPELQITNVM*EANQR.V     | 4 | 4.62 | 0.44 | -1.75 |
| IPI00031030 | Isoform 1 of Amyloid-like protein 2 precursor                   | K.VPYVAQEIQEEIDELLQEQR.A                   | 2 | 6.91 | 0.34 | -5.42 |
| IPI00031030 | Isoform 1 of Amyloid-like protein 2 precursor                   | K.VPYVAQEIQEEIDELLQEQR.A                   | 3 | 5.56 | 0.26 | -4.89 |
| IPI00031030 | Isoform 1 of Amyloid-like protein 2 precursor                   | K.VPYVAQEIQEEIDELLQEQR.A                   | 4 | 3.41 | 0.07 | -0.97 |
| IPI00031030 | Isoform 1 of Amyloid-like protein 2 precursor                   | L.DVKEM*IFNAER.V                           | 2 | 3.49 | 0.36 | -2.08 |
| IPI00031030 | Isoform 1 of Amyloid-like protein 2 precursor                   | Q.FTASISETPVDVR.V                          | 2 | 3.76 | 0.36 | -6.76 |
| IPI00031030 | Isoform 1 of Amyloid-like protein 2 precursor                   | R.ADM*DQFTASISETPVDVR.V                    | 2 | 5.80 | 0.65 | -6.64 |

|             |                                                        |                                            |   |      |      |       |
|-------------|--------------------------------------------------------|--------------------------------------------|---|------|------|-------|
| IPI00031030 | Isoform 1 of Amyloid-like protein 2 precursor          | R.ESVGPLREDFSLSSSA.L                       | 2 | 3.29 | 0.43 | -6.02 |
| IPI00031030 | Isoform 1 of Amyloid-like protein 2 precursor          | R.HYQHVLAVDPEK.A                           | 2 | 3.65 | 0.36 | -4.27 |
| IPI00031030 | Isoform 1 of Amyloid-like protein 2 precursor          | R.M*ALENYLAALQSDPPRPHR.I                   | 3 | 3.27 | 0.34 | -3.92 |
| IPI00031030 | Isoform 1 of Amyloid-like protein 2 precursor          | R.M*ALENYLAALQSDPPRPHR.I                   | 4 | 4.20 | 0.39 | -2.53 |
| IPI00031030 | Isoform 1 of Amyloid-like protein 2 precursor          | R.QTLIQHFQAM*VK.A                          | 2 | 1.79 | 0.23 | -3.65 |
| IPI00031030 | Isoform 1 of Amyloid-like protein 2 precursor          | R.VEAM*LNDR.R                              | 2 | 2.96 | 0.32 | -3.35 |
| IPI00031030 | Isoform 1 of Amyloid-like protein 2 precursor          | R.VGGLEEEER.E                              | 1 | 1.96 | 0.11 | -1.33 |
| IPI00031030 | Isoform 1 of Amyloid-like protein 2 precursor          | R.VGGLEEEER.E                              | 2 | 2.66 | 0.22 | -2.93 |
| IPI00031030 | Isoform 1 of Amyloid-like protein 2 precursor          | R.VGGLEEEERESVGP.L                         | 2 | 3.54 | 0.28 | -4.24 |
| IPI00031030 | Isoform 1 of Amyloid-like protein 2 precursor          | R.VGGLEEEERESVGPLR.E                       | 2 | 3.65 | 0.31 | -2.39 |
| IPI00031030 | Isoform 1 of Amyloid-like protein 2 precursor          | R.VGGLEEEERESVGPLR.E                       | 3 | 4.11 | 0.33 | -2.36 |
| IPI00031030 | Isoform 1 of Amyloid-like protein 2 precursor          | R.VGGLEEEERESVGPLRED.F                     | 2 | 3.63 | 0.34 | -1.92 |
| IPI00031030 | Isoform 1 of Amyloid-like protein 2 precursor          | R.VGGLEEEERESVGPLRED.F                     | 3 | 4.56 | 0.33 | -1.52 |
| IPI00031030 | Isoform 1 of Amyloid-like protein 2 precursor          | R.VGGLEEEERESVGPLREDF.S.L                  | 3 | 3.75 | 0.28 | -2.57 |
| IPI00031030 | Isoform 1 of Amyloid-like protein 2 precursor          | R.VGGLEEEERESVGPLREDFSLSSSA.L              | 2 | 3.09 | 0.34 | -2.69 |
| IPI00031030 | Isoform 1 of Amyloid-like protein 2 precursor          | R.VGGLEEEERESVGPLREDFSLSSSA.L              | 3 | 3.79 | 0.42 | -5.32 |
| IPI00031030 | Isoform 1 of Amyloid-like protein 2 precursor          | R.VSIDNWCR.R                               | 2 | 2.61 | 0.26 | -1.59 |
| IPI00031030 | Isoform 1 of Amyloid-like protein 2 precursor          | R.VSSEESSEIIPPFHPPFHPALPENEDTQPELYHPM*KK.G | 4 | 3.89 | 0.21 | -4.62 |
| IPI00031030 | Isoform 1 of Amyloid-like protein 2 precursor          | R.VSSEESSEIIPPFHPPFHPALPENEDTQPELYHPM*KK.G | 5 | 3.46 | 0.32 | -4.58 |
| IPI00031030 | Isoform 1 of Amyloid-like protein 2 precursor          | R.WYFDLSK.G                                | 1 | 1.97 | 0.06 | -3.26 |
| IPI00031030 | Isoform 1 of Amyloid-like protein 2 precursor          | R.WYFDLSK.G                                | 2 | 2.07 | 0.20 | -2.20 |
| IPI00031086 | Insulin-like growth factor-binding protein 1 precursor | R.IPGSPEIR.G                               | 2 | 2.19 | 0.08 | -1.81 |
| IPI00031121 | Carboxypeptidase E precursor                           | K.AASQPGEKDWVGR.S                          | 2 | 3.39 | 0.36 |       |
| IPI00031121 | Carboxypeptidase E precursor                           | K.AASQPGEKDWVGR.S                          | 3 | 2.34 | 0.13 | -2.84 |
| IPI00031121 | Carboxypeptidase E precursor                           | K.AVIHWIM*DIPFVLSANLHGGDLVANYPYDETR.S      | 3 | 5.11 | 0.45 | -2.31 |
| IPI00031121 | Carboxypeptidase E precursor                           | K.AVIHWIM*DIPFVLSANLHGGDLVANYPYDETR.S      | 4 | 3.27 | 0.23 | -2.42 |
| IPI00031121 | Carboxypeptidase E precursor                           | K.DGDYWR.L                                 | 2 | 2.23 | 0.10 | -3.05 |
| IPI00031121 | Carboxypeptidase E precursor                           | K.EGGPNNHLLK.N                             | 1 | 2.12 | 0.17 | -4.07 |
| IPI00031121 | Carboxypeptidase E precursor                           | K.GNETIVNLIHSTR.I                          | 3 | 2.71 | 0.26 | -2.32 |
| IPI00031121 | Carboxypeptidase E precursor                           | K.KVAVPYSPAAGVDFELESF.SER.K                | 2 | 5.05 | 0.59 | -3.14 |
| IPI00031121 | Carboxypeptidase E precursor                           | K.KVAVPYSPAAGVDFELESF.SER.K                | 3 | 5.11 | 0.52 | -5.67 |
| IPI00031121 | Carboxypeptidase E precursor                           | K.LTASAPGYLAITK.K                          | 1 | 1.81 | 0.24 | -2.69 |
| IPI00031121 | Carboxypeptidase E precursor                           | K.LTASAPGYLAITK.K                          | 2 | 4.13 | 0.37 | -2.82 |
| IPI00031121 | Carboxypeptidase E precursor                           | K.LTASAPGYLAITK.K                          | 3 | 4.43 | 0.35 | -2.74 |
| IPI00031121 | Carboxypeptidase E precursor                           | K.LTASAPGYLAITKK.V                         | 1 | 1.62 | 0.09 | -4.68 |
| IPI00031121 | Carboxypeptidase E precursor                           | K.LTASAPGYLAITKK.V                         | 2 | 3.12 | 0.37 | -3.93 |
| IPI00031121 | Carboxypeptidase E precursor                           | K.LTASAPGYLAITKK.V                         | 3 | 1.89 | 0.28 | -2.15 |
| IPI00031121 | Carboxypeptidase E precursor                           | K.NSLISYLEQIHR.G                           | 2 | 3.14 | 0.41 | -3.13 |
| IPI00031121 | Carboxypeptidase E precursor                           | K.NSLISYLEQIHR.G                           | 3 | 2.64 | 0.19 | -2.63 |
| IPI00031121 | Carboxypeptidase E precursor                           | K.TYWEDNKNSLISYLEQIHR.G                    | 4 | 2.97 | 0.22 | -3.11 |
| IPI00031121 | Carboxypeptidase E precursor                           | K.VAVPYSPAAGVDFELESF.SER.K                 | 2 | 4.96 | 0.59 | -8.60 |

|             |                                                     |                              |   |      |      |       |
|-------------|-----------------------------------------------------|------------------------------|---|------|------|-------|
| IPI00031121 | Carboxypeptidase E precursor                        | K.VAVPYSPAAGVDFELESFSEK.K    | 3 | 3.35 | 0.35 | -4.58 |
| IPI00031121 | Carboxypeptidase E precursor                        | K.YIGNM*HGNEAVGR.E           | 2 | 3.66 | 0.47 | -3.91 |
| IPI00031121 | Carboxypeptidase E precursor                        | R.EALVSVWLQCTAIR.I           | 2 | 4.83 | 0.52 | -5.51 |
| IPI00031121 | Carboxypeptidase E precursor                        | R.ELLIFLAQYLCNEYQK.G         | 2 | 5.53 | 0.45 | -6.58 |
| IPI00031121 | Carboxypeptidase E precursor                        | R.ELLIFLAQYLCNEYQK.G         | 3 | 4.73 | 0.40 | -4.25 |
| IPI00031121 | Carboxypeptidase E precursor                        | R.ELLVIELSDNPGVHEPGEPEFK.Y   | 2 | 4.96 | 0.58 | -5.66 |
| IPI00031121 | Carboxypeptidase E precursor                        | R.ELLVIELSDNPGVHEPGEPEFK.Y   | 3 | 4.76 | 0.47 | -8.88 |
| IPI00031121 | Carboxypeptidase E precursor                        | R.IHIM*PSLNPDPGFEK.A         | 2 | 3.43 | 0.35 | -3.59 |
| IPI00031121 | Carboxypeptidase E precursor                        | R.IHIM*PSLNPDPGFEK.A         | 3 | 3.55 | 0.20 | -3.16 |
| IPI00031121 | Carboxypeptidase E precursor                        | R.IVYVNEK.E                  | 2 | 2.18 | 0.15 | -2.57 |
| IPI00031121 | Carboxypeptidase E precursor                        | R.IVYVNEKEGGPNNHLLK.N        | 2 | 5.05 | 0.41 | -3.82 |
| IPI00031121 | Carboxypeptidase E precursor                        | R.IVYVNEKEGGPNNHLLK.N        | 3 | 3.20 | 0.29 | -2.99 |
| IPI00031121 | Carboxypeptidase E precursor                        | R.KNDDSSFDVGT.N              | 2 | 3.07 | 0.39 | -3.14 |
| IPI00031121 | Carboxypeptidase E precursor                        | R.LQQEDGISFEYHR.Y            | 2 | 4.26 | 0.50 | -3.94 |
| IPI00031121 | Carboxypeptidase E precursor                        | R.LQQEDGISFEYHR.Y            | 3 | 3.57 | 0.33 | -3.05 |
| IPI00031121 | Carboxypeptidase E precursor                        | R.LQQEDGISFEYHRYPELR.E       | 2 | 2.74 | 0.20 | -3.87 |
| IPI00031121 | Carboxypeptidase E precursor                        | R.NFPDLDR.I                  | 1 | 1.60 | 0.05 | -2.79 |
| IPI00031121 | Carboxypeptidase E precursor                        | R.NFPDLDRIVYVNEK.E           | 2 | 4.09 | 0.30 | -1.66 |
| IPI00031121 | Carboxypeptidase E precursor                        | R.NFPDLDRIVYVNEK.E           | 3 | 1.52 | 0.12 | -2.16 |
| IPI00031121 | Carboxypeptidase E precursor                        | R.NFPDLDRIVYVNEKEGGPNNHLLK.N | 3 | 5.09 | 0.38 | -2.22 |
| IPI00031121 | Carboxypeptidase E precursor                        | R.NFPDLDRIVYVNEKEGGPNNHLLK.N | 4 | 1.49 | 0.19 | -1.47 |
| IPI00031121 | Carboxypeptidase E precursor                        | R.RLQQEDGISFEYHR.Y           | 2 | 4.20 | 0.47 | -4.25 |
| IPI00031121 | Carboxypeptidase E precursor                        | R.RLQQEDGISFEYHR.Y           | 3 | 4.65 | 0.38 | -3.93 |
| IPI00031121 | Carboxypeptidase E precursor                        | R.RLQQEDGISFEYHRYPELR.E      | 4 | 2.94 | 0.32 | -3.28 |
| IPI00031121 | Carboxypeptidase E precursor                        | R.SGSAHEYSSSPDDAIFQSLA.R     | 2 | 3.61 | 0.30 | -1.85 |
| IPI00031121 | Carboxypeptidase E precursor                        | R.SGSAHEYSSSPDDAIFQSLAR.A    | 2 | 6.29 | 0.56 | -5.15 |
| IPI00031121 | Carboxypeptidase E precursor                        | R.SGSAHEYSSSPDDAIFQSLAR.A    | 3 | 4.75 | 0.42 | -3.78 |
| IPI00031121 | Carboxypeptidase E precursor                        | R.SNAQGIDLNR.N               | 2 | 4.02 | 0.30 | -2.06 |
| IPI00031121 | Carboxypeptidase E precursor                        | W.EDNKNSLISYLEQIHR.G         | 2 | 3.48 | 0.32 | -2.77 |
| IPI00031121 | Carboxypeptidase E precursor                        | W.EDNKNSLISYLEQIHR.G         | 3 | 3.99 | 0.31 | -3.16 |
| IPI00031121 | Carboxypeptidase E precursor                        | Y.KLTASAPGYLAITK.K           | 2 | 4.39 | 0.46 | -0.75 |
| IPI00031121 | Carboxypeptidase E precursor                        | Y.KLTASAPGYLAITK.K           | 3 | 4.15 | 0.34 | -2.41 |
| IPI00031131 | Adipocyte plasma membrane-associated protein        | R.YSLVLELSDSGAFR.R           | 2 | 3.21 | 0.07 |       |
| IPI00031411 | Cadherin-related tumor suppressor homolog precursor | R.LPEREKPDR.E                | 2 | 3.20 | 0.07 |       |
| IPI00031461 | Rab GDP dissociation inhibitor beta                 | K.DLGTESQIFISR.T             | 2 | 4.05 | 0.35 | -3.47 |
| IPI00031461 | Rab GDP dissociation inhibitor beta                 | K.FDLGQDVIDFTGHALALYR.T      | 2 | 4.85 | 0.52 | -4.24 |
| IPI00031461 | Rab GDP dissociation inhibitor beta                 | K.FDLGQDVIDFTGHALALYR.T      | 3 | 4.02 | 0.36 | -3.60 |
| IPI00031461 | Rab GDP dissociation inhibitor beta                 | K.FLM*ANGLVK.M               | 2 | 2.34 | 0.08 | -0.96 |
| IPI00031461 | Rab GDP dissociation inhibitor beta                 | K.FVSISDLLVPK.D              | 2 | 2.57 | 0.19 | -3.21 |
| IPI00031461 | Rab GDP dissociation inhibitor beta                 | K.IYKVPSTEAEALASSLM*GLFEK.R  | 3 | 2.77 | 0.37 | -2.15 |
| IPI00031461 | Rab GDP dissociation inhibitor beta                 | K.LYSESLAR.Y                 | 1 | 1.68 | 0.11 | -2.03 |

|             |                                                                                |                                   |   |      |      |       |
|-------------|--------------------------------------------------------------------------------|-----------------------------------|---|------|------|-------|
| IPI00031461 | Rab GDP dissociation inhibitor beta                                            | K.LYSESLAR.Y                      | 2 | 2.53 | 0.20 | -3.09 |
| IPI00031461 | Rab GDP dissociation inhibitor beta                                            | K.NTNDANSCQIIPQNQVNR.K            | 2 | 3.37 | 0.33 | -3.67 |
| IPI00031461 | Rab GDP dissociation inhibitor beta                                            | K.SPYLYPLYGLGELPQGFAR.L           | 2 | 6.04 | 0.56 | -4.21 |
| IPI00031461 | Rab GDP dissociation inhibitor beta                                            | K.SPYLYPLYGLGELPQGFAR.L           | 3 | 4.46 | 0.33 | -4.06 |
| IPI00031461 | Rab GDP dissociation inhibitor beta                                            | R.IKLYSESLAR.Y                    | 1 | 2.49 | 0.27 | -1.77 |
| IPI00031461 | Rab GDP dissociation inhibitor beta                                            | R.IKLYSESLAR.Y                    | 2 | 2.49 | 0.18 | -1.31 |
| IPI00031461 | Rab GDP dissociation inhibitor beta                                            | R.KFDLGQDVIDFTGHALALYR.T          | 2 | 4.71 | 0.49 | -7.20 |
| IPI00031461 | Rab GDP dissociation inhibitor beta                                            | R.KFDLGQDVIDFTGHALALYR.T          | 3 | 7.26 | 0.56 | -6.47 |
| IPI00031461 | Rab GDP dissociation inhibitor beta                                            | R.KFDLGQDVIDFTGHALALYR.T          | 4 | 5.53 | 0.42 | -3.92 |
| IPI00031461 | Rab GDP dissociation inhibitor beta                                            | R.LSAIYGGTYM*LNKPIEEIIVQNGK.V     | 3 | 4.80 | 0.50 | -1.98 |
| IPI00031461 | Rab GDP dissociation inhibitor beta                                            | R.TDDYLDQPCYETINR.I               | 2 | 4.40 | 0.45 | -6.23 |
| IPI00031461 | Rab GDP dissociation inhibitor beta                                            | R.TFEGIDPK.K                      | 2 | 2.64 | 0.18 | -3.34 |
| IPI00031485 | Mitochondrial ribosomal protein 63                                             | R.EQERGHAAVR.R                    | 2 | 1.72 | 0.16 |       |
| IPI00031506 | Potassium/sodium hyperpolarization-activated cyclic nucleotide-gated channel 1 | K.STQALHNTNLTR.E                  | 2 | 3.19 | 0.25 | -1.69 |
| IPI00031506 | Potassium/sodium hyperpolarization-activated cyclic nucleotide-gated channel 1 | R.ESSSVLNTDPDAEKPR.F              | 2 | 3.79 | 0.33 | -2.56 |
| IPI00031506 | Potassium/sodium hyperpolarization-activated cyclic nucleotide-gated channel 1 | R.GVPPAPPPPAALPR.E                | 2 | 1.74 | 0.15 | -3.42 |
| IPI00031510 | Semaphorin-3A precursor                                                        | K.DLPDDVITFAR.S                   | 2 | 2.49 | 0.34 | -2.96 |
| IPI00031510 | Semaphorin-3A precursor                                                        | K.NPVVYGVFTTSSNIFK.G              | 2 | 3.95 | 0.48 | -4.42 |
| IPI00031510 | Semaphorin-3A precursor                                                        | K.QQQLYIGSTAGVAQLPLHR.C           | 3 | 3.08 | 0.41 | -3.12 |
| IPI00031510 | Semaphorin-3A precursor                                                        | K.TFGGFSTKDLPDDVITFAR.S           | 3 | 4.11 | 0.34 | -3.23 |
| IPI00031510 | Semaphorin-3A precursor                                                        | R.DPYCAWDGSACSR.Y                 | 2 | 2.63 | 0.31 | -4.49 |
| IPI00031534 | Alpha-N-acetylgalactosaminide alpha-2,6-sialyltransferase 1                    | K.GYEQDVGTR.T                     | 2 | 3.02 | 0.33 | -2.09 |
| IPI00031534 | Alpha-N-acetylgalactosaminide alpha-2,6-sialyltransferase 1                    | K.VVTRFPPVPPQQLLLASLPAGSLR.C      | 3 | 3.15 | 0.42 | -2.64 |
| IPI00031534 | Alpha-N-acetylgalactosaminide alpha-2,6-sialyltransferase 1                    | R.GKEANQAPPEEQDKVPHTAQR.A         | 3 | 4.86 | 0.39 | -4.10 |
| IPI00031534 | Alpha-N-acetylgalactosaminide alpha-2,6-sialyltransferase 1                    | R.GKEANQAPPEEQDKVPHTAQR.A         | 4 | 4.18 | 0.39 | -3.69 |
| IPI00031534 | Alpha-N-acetylgalactosaminide alpha-2,6-sialyltransferase 1                    | R.RTTIYAEPVPENNALNTQTQPKAHTTGDR.G | 3 | 3.04 | 0.17 |       |
| IPI00031547 | Desmoglein-3 precursor                                                         | K.GQYDEEEM*TM*QQAQ.R              | 2 | 2.79 | 0.24 | -1.21 |
| IPI00031549 | Isoform 3A of Desmocollin-3 precursor                                          | K.VILNVPSKLEADKIIGR.V             | 2 | 4.12 | 0.42 | -1.57 |
| IPI00031549 | Isoform 3A of Desmocollin-3 precursor                                          | K.VILNVPSKLEADKIIGR.V             | 3 | 4.00 | 0.41 | -3.85 |
| IPI00031549 | Isoform 3A of Desmocollin-3 precursor                                          | R.SFTIWLSDK.R                     | 2 | 2.55 | 0.12 | -2.26 |
| IPI00031549 | Isoform 3A of Desmocollin-3 precursor                                          | R.VLNDGSVYTAR.A                   | 2 | 3.24 | 0.27 | -3.38 |
| IPI00031564 | Uncharacterized protein C7orf24                                                | K.AIEPNDYTGKVSSEIEDIIK.K          | 3 | 3.20 | 0.12 | -6.03 |
| IPI00031564 | Uncharacterized protein C7orf24                                                | K.ENGLPLEYQEK.L                   | 2 | 2.94 | 0.21 | -2.64 |
| IPI00031564 | Uncharacterized protein C7orf24                                                | R.LQDFKLDGNSQGK.T                 | 2 | 3.56 | 0.34 | -2.81 |

|             |                                                                 |                                              |   |      |      |       |
|-------------|-----------------------------------------------------------------|----------------------------------------------|---|------|------|-------|
| IPI00031564 | Uncharacterized protein C7orf24                                 | R.LQDFKLDGNSQGK.T                            | 3 | 3.19 | 0.37 | -1.85 |
| IPI00031564 | Uncharacterized protein C7orf24                                 | R.NPSAAFFCVAR.L                              | 2 | 4.23 | 0.38 | -2.04 |
| IPI00031564 | Uncharacterized protein C7orf24                                 | R.SYLM*TNYESAPSPQYK.K                        | 2 | 4.29 | 0.49 | -3.33 |
| IPI00031627 | DNA-directed RNA polymerase II subunit RPB1                     | R.AEIQELAM*VPRM*IVTPQSNRPVMGIVQDTLTAVRKFTK.R | 4 | 3.30 | 0.07 | -1.12 |
| IPI00031696 | FAST kinase domain-containing protein 3                         | K.ESHLDTLSR.A                                | 2 | 2.28 | 0.06 | -0.22 |
| IPI00031708 | Fumarylacetoacetase                                             | R.ASSVVVSGTPIR.R                             | 2 | 2.87 | 0.18 | -1.91 |
| IPI00031708 | Fumarylacetoacetase                                             | R.IGVAIGDQILDLSIK.H                          | 2 | 4.85 | 0.45 | -4.96 |
| IPI00031708 | Fumarylacetoacetase                                             | R.VFLQNLLSVSQAR.L                            | 2 | 4.21 | 0.30 | -3.01 |
| IPI00031718 | Isoform 1 of Ectonucleoside triphosphate diphosphohydrolase 4   | K.VSDYISPLLNFAAEHVPR.A                       | 3 | 2.51 | 0.18 | -3.36 |
| IPI00031718 | Isoform 1 of Ectonucleoside triphosphate diphosphohydrolase 4   | R.M*GGDYNAAK.F                               | 2 | 1.76 | 0.08 | -2.94 |
| IPI00031765 | Isoform 2 of Protocadherin gamma C4 precursor                   | R.DVNDHAPR.F                                 | 2 | 2.08 | 0.06 | -0.87 |
| IPI00031769 | Esophageal cancer-related gene 4 protein precursor              | K.AKEFLGSLK.R                                | 1 | 2.45 | 0.14 | -2.79 |
| IPI00031769 | Esophageal cancer-related gene 4 protein precursor              | K.AKEFLGSLK.R                                | 2 | 2.38 | 0.21 | -1.90 |
| IPI00031769 | Esophageal cancer-related gene 4 protein precursor              | K.AKEFLGSLKR.Q                               | 2 | 2.35 | 0.16 | -3.02 |
| IPI00031769 | Esophageal cancer-related gene 4 protein precursor              | K.EFLGSLK.R                                  | 1 | 2.51 | 0.10 | -2.94 |
| IPI00031769 | Esophageal cancer-related gene 4 protein precursor              | K.TKVAVDENKAKE.F                             | 2 | 3.74 | 0.35 | -2.79 |
| IPI00031769 | Esophageal cancer-related gene 4 protein precursor              | K.VAVDENKAK.E                                | 2 | 2.43 | 0.24 | -1.17 |
| IPI00031769 | Esophageal cancer-related gene 4 protein precursor              | K.VAVDENKAKEFLGSLK.R                         | 2 | 5.01 | 0.52 | -3.51 |
| IPI00031769 | Esophageal cancer-related gene 4 protein precursor              | K.VAVDENKAKEFLGSLK.R                         | 3 | 3.10 | 0.40 | -2.72 |
| IPI00031769 | Esophageal cancer-related gene 4 protein precursor              | R.EAPVPTK.T                                  | 1 | 1.50 | 0.13 | -2.78 |
| IPI00031789 | Isoform 1 of Interleukin-1 receptor accessory protein precursor | K.DSCFNPM*K.L                                | 2 | 2.74 | 0.20 | -0.86 |
| IPI00031789 | Isoform 1 of Interleukin-1 receptor accessory protein precursor | K.FNYSTAHSAGLTLIYWTR.Q                       | 3 | 3.46 | 0.16 |       |
| IPI00031789 | Isoform 1 of Interleukin-1 receptor accessory protein precursor | K.VAFPLEVVQK.D                               | 1 | 1.77 | 0.15 | -3.02 |
| IPI00031789 | Isoform 1 of Interleukin-1 receptor accessory protein precursor | K.VAFPLEVVQK.D                               | 2 | 2.83 | 0.32 | -1.67 |
| IPI00031789 | Isoform 1 of Interleukin-1 receptor accessory protein precursor | R.DLEEPINFR.L                                | 2 | 2.35 | 0.23 | -3.86 |
| IPI00031821 | Integral membrane protein 2B                                    | K.IFEEEEVEFISVPVPEFADSDPANIVHDFNKK.L         | 4 | 2.79 | 0.12 | -2.58 |



|             |                                                  |                                  |   |      |      |       |
|-------------|--------------------------------------------------|----------------------------------|---|------|------|-------|
| IPI00031821 | Integral membrane protein 2B                     | K.VTFNSALAQK.E                   | 2 | 2.66 | 0.30 | -2.20 |
| IPI00031821 | Integral membrane protein 2B                     | K.YIKDDVILNEPSADAPAA.L           | 2 | 4.21 | 0.45 | -6.00 |
| IPI00031821 | Integral membrane protein 2B                     | R.EASNCFAIR.H                    | 1 | 1.81 | 0.07 | -1.94 |
| IPI00031821 | Integral membrane protein 2B                     | R.EASNCFAIR.H                    | 2 | 2.37 | 0.14 | -0.97 |
| IPI00031821 | Integral membrane protein 2B                     | R.NLELLINIK.A                    | 2 | 3.53 | 0.16 | -2.02 |
| IPI00031907 | Isoform 1 of Transmembrane protein 108 precursor | R.GRNPSSTPLGQK.R                 | 2 | 3.42 | 0.36 | -3.70 |
| IPI00031907 | Isoform 1 of Transmembrane protein 108 precursor | R.NPSSTPLGQK.R                   | 2 | 2.14 | 0.07 | -0.64 |
| IPI00032050 | WW domain-binding protein 2                      | K.AAEAAAASAYNPGNPHN.V            | 2 | 3.98 | 0.56 | -5.41 |
| IPI00032050 | WW domain-binding protein 2                      | K.KGTVYLTPYR.V                   | 2 | 2.46 | 0.21 | -3.68 |
| IPI00032050 | WW domain-binding protein 2                      | R.M*LQVASQASR.G                  | 2 | 2.69 | 0.17 | -1.16 |
| IPI00032063 | Similar to Candidate tumor suppressor protein    | K.AIAVDPIAGK.L                   | 2 | 2.60 | 0.13 | -3.10 |
| IPI00032063 | Similar to Candidate tumor suppressor protein    | K.IADEYM*PIENLVNPR.A             | 2 | 3.71 | 0.32 | 1.48  |
| IPI00032063 | Similar to Candidate tumor suppressor protein    | K.ILFQNKQKPVGLSIDYVENK.L         | 3 | 3.01 | 0.24 | -3.26 |
| IPI00032063 | Similar to Candidate tumor suppressor protein    | K.LFFTDYGNVAK.V                  | 2 | 3.38 | 0.27 | -6.65 |
| IPI00032063 | Similar to Candidate tumor suppressor protein    | K.NELFLFYGK.G                    | 2 | 2.54 | 0.25 | -1.58 |
| IPI00032063 | Similar to Candidate tumor suppressor protein    | K.SIHLSDETNLNSPIRPYENPR.Y        | 4 | 3.24 | 0.23 | -3.29 |
| IPI00032063 | Similar to Candidate tumor suppressor protein    | R.IESASM*SGAGR.K                 | 2 | 3.39 | 0.49 | -1.06 |
| IPI00032063 | Similar to Candidate tumor suppressor protein    | R.NLYFVDHVGDR.I                  | 2 | 1.90 | 0.09 | -2.37 |
| IPI00032063 | Similar to Candidate tumor suppressor protein    | R.QIFVTSK.M                      | 2 | 1.38 | 0.09 | -2.67 |
| IPI00032063 | Similar to Candidate tumor suppressor protein    | R.SIAVHPEK.G                     | 2 | 2.26 | 0.18 | -1.50 |
| IPI00032063 | Similar to Candidate tumor suppressor protein    | R.TGFNLGSDGR.S                   | 2 | 3.14 | 0.31 | -0.65 |
| IPI00032063 | Similar to Candidate tumor suppressor protein    | R.TTLIAGAM*EHPR.A                | 3 | 2.41 | 0.12 | -2.46 |
| IPI00032179 | Antithrombin III variant                         | A.EGTQVLELFPKGGDDITM*VLILPKPEK.S | 3 | 3.56 | 0.32 | -1.94 |
| IPI00032179 | Antithrombin III variant                         | H.LADSKNDNDNIFLSPLSISTAFAM*TK.L  | 3 | 4.76 | 0.36 | -3.54 |
| IPI00032179 | Antithrombin III variant                         | K.ADGESCSASM*M*YQEGK.F           | 2 | 4.51 | 0.57 | -4.18 |
| IPI00032179 | Antithrombin III variant                         | K.ADGESCSASM*M*YQEGK.F           | 3 | 4.58 | 0.56 | -3.00 |
| IPI00032179 | Antithrombin III variant                         | K.ADGESCSASM*MYQEGK.F            | 2 | 4.40 | 0.07 |       |
| IPI00032179 | Antithrombin III variant                         | K.ADGESCSASMM*YQEGK.F            | 2 | 4.90 | 0.08 |       |
| IPI00032179 | Antithrombin III variant                         | K.ADGESCSASMMYQEGK.F             | 2 | 4.41 | 0.41 |       |
| IPI00032179 | Antithrombin III variant                         | K.AFLEVNEEGSEAAASTAVVIAGR.S      | 2 | 6.93 | 0.56 | -7.77 |
| IPI00032179 | Antithrombin III variant                         | K.AFLEVNEEGSEAAASTAVVIAGR.S      | 3 | 5.58 | 0.51 | -5.54 |
| IPI00032179 | Antithrombin III variant                         | K.ELFYKADGESCSASM*M*YQEGK.F      | 2 | 4.65 | 0.56 | -2.65 |
| IPI00032179 | Antithrombin III variant                         | K.ELFYKADGESCSASMMYQEGK.F        | 2 | 5.35 | 0.41 |       |
| IPI00032179 | Antithrombin III variant                         | K.ELFYKADGESCSASMMYQEGK.F        | 3 | 4.27 | 0.23 |       |
| IPI00032179 | Antithrombin III variant                         | K.ELTPEVLQEWLDELEEM*M*LVVHM*PR.F | 3 | 2.84 | 0.13 | -4.94 |
| IPI00032179 | Antithrombin III variant                         | K.EQLQDM*GLVDFLFSPEK.S           | 2 | 4.67 | 0.44 | -4.79 |
| IPI00032179 | Antithrombin III variant                         | K.EQLQDM*GLVDFLFSPEK.S           | 3 | 3.98 | 0.33 | -4.18 |
| IPI00032179 | Antithrombin III variant                         | K.EQLQDMGLVDFLFSPEK.S            | 2 | 4.48 | 0.47 |       |
| IPI00032179 | Antithrombin III variant                         | K.GDDITM*VLILPKPEK.S             | 3 | 3.34 | 0.31 | -2.67 |
| IPI00032179 | Antithrombin III variant                         | K.LPGIVAEGR.D                    | 2 | 2.20 | 0.20 | -1.59 |

|             |                          |                                         |   |      |      |       |
|-------------|--------------------------|-----------------------------------------|---|------|------|-------|
| IPI00032179 | Antithrombin III variant | K.LPGIVAEGRDDLYVSDAFHK.A                | 3 | 4.15 | 0.48 | -5.59 |
| IPI00032179 | Antithrombin III variant | K.LPGIVAEGRDDLYVSDAFHK.A                | 4 | 3.41 | 0.33 | -2.82 |
| IPI00032179 | Antithrombin III variant | K.LQPLDFK.E                             | 1 | 1.41 | 0.09 | -3.27 |
| IPI00032179 | Antithrombin III variant | K.LQPLDFKENAEQSR.A                      | 1 | 3.28 | 0.29 |       |
| IPI00032179 | Antithrombin III variant | K.LQPLDFKENAEQSR.A                      | 2 | 3.88 | 0.43 | -3.29 |
| IPI00032179 | Antithrombin III variant | K.LQPLDFKENAEQSR.A                      | 3 | 1.77 | 0.19 | -3.11 |
| IPI00032179 | Antithrombin III variant | K.LVSANRLFQDK.S                         | 2 | 2.72 | 0.34 | -3.30 |
| IPI00032179 | Antithrombin III variant | K.NDNDNIFLSPLSISTAFAM*TK.L              | 2 | 6.37 | 0.59 | -4.78 |
| IPI00032179 | Antithrombin III variant | K.NDNDNIFLSPLSISTAFAM*TK.L              | 3 | 5.71 | 0.56 | -4.04 |
| IPI00032179 | Antithrombin III variant | K.NDNDNIFLSPLSISTAFAMTK.L               | 2 | 4.89 | 0.45 |       |
| IPI00032179 | Antithrombin III variant | K.SKFSPESTR.K                           | 1 | 2.04 | 0.13 | -4.60 |
| IPI00032179 | Antithrombin III variant | K.SKFSPESTR.K                           | 2 | 2.44 | 0.08 | -2.60 |
| IPI00032179 | Antithrombin III variant | K.SKLPGIVAEGR.D                         | 1 | 2.51 | 0.33 | -2.84 |
| IPI00032179 | Antithrombin III variant | K.SKLPGIVAEGR.D                         | 2 | 3.32 | 0.38 | -1.40 |
| IPI00032179 | Antithrombin III variant | K.SKLPGIVAEGRDDLYVSDAFHK.A              | 2 | 5.01 | 0.60 | -3.67 |
| IPI00032179 | Antithrombin III variant | K.SKLPGIVAEGRDDLYVSDAFHK.A              | 3 | 3.73 | 0.47 | -3.50 |
| IPI00032179 | Antithrombin III variant | K.SKLPGIVAEGRDDLYVSDAFHK.A              | 4 | 5.21 | 0.54 | -4.04 |
| IPI00032179 | Antithrombin III variant | K.SKLPGIVAEGRDDLYVSDAFHK.A              | 5 | 3.18 | 0.39 | -1.32 |
| IPI00032179 | Antithrombin III variant | K.TSDQIHFFFAK.L                         | 1 | 2.99 | 0.30 | -3.49 |
| IPI00032179 | Antithrombin III variant | K.TSDQIHFFFAK.L                         | 2 | 3.80 | 0.43 | -4.59 |
| IPI00032179 | Antithrombin III variant | K.TSDQIHFFFAK.L                         | 3 | 2.28 | 0.19 | -3.19 |
| IPI00032179 | Antithrombin III variant | Q.PLDFKENAEQSR.A                        | 2 | 4.00 | 0.45 | -3.06 |
| IPI00032179 | Antithrombin III variant | R.DDLYVSDAFHK.A                         | 2 | 2.87 | 0.27 | -3.09 |
| IPI00032179 | Antithrombin III variant | R.DDLYVSDAFHK.A                         | 3 | 2.51 | 0.18 | -3.16 |
| IPI00032179 | Antithrombin III variant | R.DIPM*NPM*CIYR.S                       | 2 | 2.00 | 0.29 | -7.71 |
| IPI00032179 | Antithrombin III variant | R.DIPM*NPM*CIYR.S                       | 3 | 1.82 | 0.28 | -2.61 |
| IPI00032179 | Antithrombin III variant | R.EVPLNTIIFM*GR.V                       | 2 | 3.83 | 0.41 | -4.57 |
| IPI00032179 | Antithrombin III variant | R.EVPLNTIIFMGR.V                        | 1 | 2.93 | 0.25 | -1.66 |
| IPI00032179 | Antithrombin III variant | R.EVPLNTIIFMGR.V                        | 2 | 3.07 | 0.49 | -4.19 |
| IPI00032179 | Antithrombin III variant | R.FATTFYQHLADSK.N                       | 2 | 4.15 | 0.37 | -3.74 |
| IPI00032179 | Antithrombin III variant | R.FATTFYQHLADSKNDNDNIFLSPLSISTAF.A      | 3 | 3.56 | 0.30 | -3.68 |
| IPI00032179 | Antithrombin III variant | R.FATTFYQHLADSKNDNDNIFLSPLSISTAFAM*TK.L | 3 | 6.12 | 0.58 | -5.06 |
| IPI00032179 | Antithrombin III variant | R.FATTFYQHLADSKNDNDNIFLSPLSISTAFAM*TK.L | 4 | 4.63 | 0.43 | -5.03 |
| IPI00032179 | Antithrombin III variant | R.FRIEDGFSLK.E                          | 2 | 3.37 | 0.31 | -7.00 |
| IPI00032179 | Antithrombin III variant | R.FRIEDGFSLK.E                          | 3 | 4.32 | 0.40 | -5.24 |
| IPI00032179 | Antithrombin III variant | R.FRIEDGFSLKEQLQDM*GLVDLFSPEK.S         | 3 | 5.58 | 0.35 |       |
| IPI00032179 | Antithrombin III variant | R.FRIEDGFSLKEQLQDMGLVDLFSPEK.S          | 3 | 5.13 | 0.36 |       |
| IPI00032179 | Antithrombin III variant | R.IEDGFSLK.E                            | 2 | 2.05 | 0.19 | -2.90 |
| IPI00032179 | Antithrombin III variant | R.IEDGFSLKEQLQDM*GLVDLFSPEK.S           | 3 | 4.19 | 0.39 | -8.58 |
| IPI00032179 | Antithrombin III variant | R.ITDVIPSEAINELTVLVLVNTIYFK.G           | 2 | 4.79 | 0.49 | -3.06 |
| IPI00032179 | Antithrombin III variant | R.ITDVIPSEAINELTVLVLVNTIYFK.G           | 3 | 5.73 | 0.49 | -5.53 |
| IPI00032179 | Antithrombin III variant | R.RVAEGTQVLELPPFKGDDITM*VLILPKPEK.S     | 3 | 6.15 | 0.55 | -5.59 |

|             |                           |                                        |   |      |      |       |
|-------------|---------------------------|----------------------------------------|---|------|------|-------|
| IPI00032179 | Antithrombin III variant  | R.RVAEGTQVLELPPFKGDDITM*VLILPKPEK.S    | 4 | 5.65 | 0.50 | -4.99 |
| IPI00032179 | Antithrombin III variant  | R.RVAEGTQVLELPPFKGDDITM*VLILPKPEK.S    | 5 | 2.98 | 0.23 | -3.18 |
| IPI00032179 | Antithrombin III variant  | R.SLNPNRVTFK.A                         | 1 | 2.17 | 0.28 | -4.99 |
| IPI00032179 | Antithrombin III variant  | R.SLNPNRVTFK.A                         | 2 | 2.50 | 0.28 | -3.66 |
| IPI00032179 | Antithrombin III variant  | R.VAEGTQVLELPPFK.G                     | 2 | 3.46 | 0.31 | -3.45 |
| IPI00032179 | Antithrombin III variant  | R.VAEGTQVLELPPFKGDDITM*VLILPKPEK.S     | 2 | 4.06 | 0.42 | -4.30 |
| IPI00032179 | Antithrombin III variant  | R.VAEGTQVLELPPFKGDDITM*VLILPKPEK.S     | 3 | 5.97 | 0.53 | -6.53 |
| IPI00032179 | Antithrombin III variant  | R.VAEGTQVLELPPFKGDDITM*VLILPKPEK.S     | 4 | 3.75 | 0.41 | -4.81 |
| IPI00032179 | Antithrombin III variant  | R.VAEGTQVLELPPFKGDDITM*VLILPKPEKSLAK.V | 5 | 4.22 | 0.42 | -3.79 |
| IPI00032179 | Antithrombin III variant  | R.VAEGTQVLELPPFKGDDITMVLILPKPEK.S      | 2 | 4.70 | 0.38 |       |
| IPI00032179 | Antithrombin III variant  | R.VAEGTQVLELPPFKGDDITMVLILPKPEK.S      | 3 | 6.21 | 0.49 |       |
| IPI00032179 | Antithrombin III variant  | T.SDQIHFFFAK.L                         | 2 | 3.26 | 0.24 | -2.59 |
| IPI00032179 | Antithrombin III variant  | V.PLNTIIFM*GR.V                        | 2 | 3.65 | 0.36 | -3.75 |
| IPI00032187 | nischarin                 | K.ADFNPM*PNRGTHNCRNRNSFK.L             | 3 | 2.91 | 0.18 | -5.87 |
| IPI00032220 | Angiotensinogen precursor | A.DSQAQLLLSTVVGVTAPGLHLK.Q             | 2 | 4.90 | 0.50 | -3.35 |
| IPI00032220 | Angiotensinogen precursor | A.DSQAQLLLSTVVGVTAPGLHLK.Q             | 3 | 5.64 | 0.49 | -5.74 |
| IPI00032220 | Angiotensinogen precursor | A.LQDQLVLAQA.L                         | 2 | 3.61 | 0.26 | -2.00 |
| IPI00032220 | Angiotensinogen precursor | A.NAGKPKDPTFIPAPIQAK.T                 | 2 | 4.51 | 0.47 | -3.12 |
| IPI00032220 | Angiotensinogen precursor | A.NAGKPKDPTFIPAPIQAK.T                 | 3 | 3.92 | 0.27 | -3.19 |
| IPI00032220 | Angiotensinogen precursor | A.VQGLLVAQGR.A                         | 1 | 1.99 | 0.25 | -3.13 |
| IPI00032220 | Angiotensinogen precursor | D.FTELDVAAEKIDR.F                      | 2 | 4.14 | 0.45 | -2.07 |
| IPI00032220 | Angiotensinogen precursor | E.KALQDQLVLAQA.L                       | 3 | 3.83 | 0.18 | -2.61 |
| IPI00032220 | Angiotensinogen precursor | F.AVYDQSATALHFLGR.V                    | 2 | 4.50 | 0.45 | -2.40 |
| IPI00032220 | Angiotensinogen precursor | F.VQGLALYTPVVLPR.S                     | 2 | 4.76 | 0.50 | -3.82 |
| IPI00032220 | Angiotensinogen precursor | G.LALYTPVVLPR.S                        | 2 | 3.17 | 0.32 | -4.11 |
| IPI00032220 | Angiotensinogen precursor | H.KVLSALQAVQGLLVAQGR.A                 | 3 | 4.01 | 0.30 | -4.07 |
| IPI00032220 | Angiotensinogen precursor | H.YASDLKVEGLTFQQNSLNWM*K.K             | 2 | 5.80 | 0.53 | -3.81 |
| IPI00032220 | Angiotensinogen precursor | H.YASDLKVEGLTFQQNSLNWM*K.K             | 3 | 5.78 | 0.53 | -3.47 |
| IPI00032220 | Angiotensinogen precursor | K.ALQDQLVLAQA.L                        | 1 | 2.94 | 0.33 | -3.57 |
| IPI00032220 | Angiotensinogen precursor | K.ALQDQLVLAQA.L                        | 2 | 4.36 | 0.47 | -4.68 |
| IPI00032220 | Angiotensinogen precursor | K.ALQDQLVLAQA.L                        | 3 | 4.20 | 0.23 | -2.32 |
| IPI00032220 | Angiotensinogen precursor | K.ALQDQLVLAAKLDTEDK.L                  | 2 | 4.53 | 0.52 | -3.00 |
| IPI00032220 | Angiotensinogen precursor | K.ALQDQLVLAAKLDTEDK.L                  | 3 | 2.25 | 0.23 | -3.58 |
| IPI00032220 | Angiotensinogen precursor | K.ALQDQLVLAAKLDTEDKLR.A                | 2 | 2.89 | 0.48 | -1.62 |
| IPI00032220 | Angiotensinogen precursor | K.ALQDQLVLAAKLDTEDKLR.A                | 3 | 4.26 | 0.57 | -4.96 |
| IPI00032220 | Angiotensinogen precursor | K.ALQDQLVLAAKLDTEDKLR.A                | 4 | 3.05 | 0.53 | -4.03 |
| IPI00032220 | Angiotensinogen precursor | K.ANAGKPKDPTFIPAPIQAK.T                | 2 | 5.04 | 0.50 | -4.41 |
| IPI00032220 | Angiotensinogen precursor | K.ANAGKPKDPTFIPAPIQAK.T                | 3 | 5.08 | 0.45 | -3.37 |
| IPI00032220 | Angiotensinogen precursor | K.DPTFIPAPIQAK.T                       | 1 | 3.03 | 0.38 | -4.13 |
| IPI00032220 | Angiotensinogen precursor | K.DPTFIPAPIQAK.T                       | 2 | 3.68 | 0.36 | -4.03 |
| IPI00032220 | Angiotensinogen precursor | K.DPTFIPAPIQAK.T                       | 3 | 2.76 | 0.10 | -2.91 |
| IPI00032220 | Angiotensinogen precursor | K.IDRFM*QAVTGWK.T                      | 2 | 2.77 | 0.17 | -4.58 |

|             |                           |                                              |   |      |      |       |
|-------------|---------------------------|----------------------------------------------|---|------|------|-------|
| IPI00032220 | Angiotensinogen precursor | K.IDRFM*QAVTGWK.T                            | 3 | 2.81 | 0.17 | -1.65 |
| IPI00032220 | Angiotensinogen precursor | K.LDTEDKLR.A                                 | 1 | 2.07 | 0.19 | -4.05 |
| IPI00032220 | Angiotensinogen precursor | K.LDTEDKLR.A                                 | 2 | 3.08 | 0.17 | -1.36 |
| IPI00032220 | Angiotensinogen precursor | K.LDTEDKLRAAM*VGM*LANFLGFR.I                 | 4 | 3.86 | 0.37 | -1.63 |
| IPI00032220 | Angiotensinogen precursor | K.PKDPTFIPAPIQAK.T                           | 2 | 3.88 | 0.36 | -2.31 |
| IPI00032220 | Angiotensinogen precursor | K.QPFVQGLALYTPVVLPR.S                        | 2 | 4.94 | 0.51 | -6.74 |
| IPI00032220 | Angiotensinogen precursor | K.QPFVQGLALYTPVVLPR.S                        | 3 | 5.43 | 0.51 | -7.04 |
| IPI00032220 | Angiotensinogen precursor | K.TGCSLM*GASVDSTLAFNTYVHFQGK.M               | 3 | 3.23 | 0.29 | -2.08 |
| IPI00032220 | Angiotensinogen precursor | K.TSPVDEKALQDQLVLAALK.L                      | 2 | 5.72 | 0.51 | -3.50 |
| IPI00032220 | Angiotensinogen precursor | K.TSPVDEKALQDQLVLAALK.L                      | 3 | 3.29 | 0.43 | -3.19 |
| IPI00032220 | Angiotensinogen precursor | K.TSPVDEKALQDQLVLAALKLDTEDKLR.A              | 3 | 4.54 | 0.45 | -3.48 |
| IPI00032220 | Angiotensinogen precursor | K.VEGLTFQQNSLNWM*K.K                         | 2 | 4.50 | 0.38 | -3.42 |
| IPI00032220 | Angiotensinogen precursor | K.VLSALQAVQGLLVAQGR.A                        | 1 | 1.84 | 0.30 | -3.10 |
| IPI00032220 | Angiotensinogen precursor | K.VLSALQAVQGLLVAQGR.A                        | 2 | 5.09 | 0.51 | -7.40 |
| IPI00032220 | Angiotensinogen precursor | K.VLSALQAVQGLLVAQGR.A                        | 3 | 5.52 | 0.47 | -8.83 |
| IPI00032220 | Angiotensinogen precursor | L.DAHKVLSALQAVQGLLVAQGR.A                    | 2 | 6.80 | 0.68 | -4.13 |
| IPI00032220 | Angiotensinogen precursor | L.DAHKVLSALQAVQGLLVAQGR.A                    | 3 | 5.04 | 0.52 | -4.15 |
| IPI00032220 | Angiotensinogen precursor | L.DFTELDVAAEKIDR.F                           | 2 | 4.74 | 0.49 | -2.95 |
| IPI00032220 | Angiotensinogen precursor | L.DVAAEKIDR.F                                | 1 | 2.64 | 0.22 | -2.22 |
| IPI00032220 | Angiotensinogen precursor | L.LLSTVVGVTAPGLHLK.Q                         | 2 | 4.30 | 0.50 | -4.35 |
| IPI00032220 | Angiotensinogen precursor | L.SALQAVQGLLVAQGR.A                          | 2 | 3.53 | 0.38 | -2.60 |
| IPI00032220 | Angiotensinogen precursor | L.STVVGVTAPGLHLK.Q                           | 2 | 3.17 | 0.36 | -5.39 |
| IPI00032220 | Angiotensinogen precursor | M.PQLVLQGSYDLQDLLAQAEIPAILHTELNLQK.L         | 3 | 6.35 | 0.64 | -3.32 |
| IPI00032220 | Angiotensinogen precursor | N.AGKPKDPTFIPAPIQAK.T                        | 2 | 3.39 | 0.38 | -2.76 |
| IPI00032220 | Angiotensinogen precursor | P.FVQGLALYTPVVLPR.S                          | 2 | 4.93 | 0.48 | -2.85 |
| IPI00032220 | Angiotensinogen precursor | P.FVQGLALYTPVVLPR.S                          | 3 | 3.96 | 0.42 | -3.16 |
| IPI00032220 | Angiotensinogen precursor | Q.AVQGLLVAQGR.A                              | 1 | 2.37 | 0.22 | -3.35 |
| IPI00032220 | Angiotensinogen precursor | Q.DQLVLAALK.L                                | 1 | 2.58 | 0.25 | -2.32 |
| IPI00032220 | Angiotensinogen precursor | Q.GSYDLQDLLAQAEIPAILHTELNLQK.L               | 3 | 4.64 | 0.41 | -2.50 |
| IPI00032220 | Angiotensinogen precursor | R.AAM*VGM*LANFLGFR.I                         | 2 | 4.77 | 0.48 | -4.50 |
| IPI00032220 | Angiotensinogen precursor | R.AAM*VGM*LANFLGFR.I                         | 3 | 5.12 | 0.37 | -3.11 |
| IPI00032220 | Angiotensinogen precursor | R.AAM*VGMLANFLGFR.I                          | 2 | 3.35 | 0.05 | -4.02 |
| IPI00032220 | Angiotensinogen precursor | R.ADSQAQLLLSTVVGVTAPGLHLK.Q                  | 2 | 5.34 | 0.61 | -4.90 |
| IPI00032220 | Angiotensinogen precursor | R.ADSQAQLLLSTVVGVTAPGLHLK.Q                  | 3 | 7.24 | 0.59 | -5.90 |
| IPI00032220 | Angiotensinogen precursor | R.ADSQAQLLLSTVVGVTAPGLHLK.Q                  | 4 | 3.84 | 0.39 | -4.11 |
| IPI00032220 | Angiotensinogen precursor | R.ADSQAQLLLSTVVGVTAPGLHLKQPFVQGLALYTPVVLPR.S | 3 | 5.14 | 0.56 | -3.26 |
| IPI00032220 | Angiotensinogen precursor | R.ADSQAQLLLSTVVGVTAPGLHLKQPFVQGLALYTPVVLPR.S | 4 | 5.46 | 0.60 | -3.61 |
| IPI00032220 | Angiotensinogen precursor | R.ADSQAQLLLSTVVGVTAPGLHLKQPFVQGLALYTPVVLPR.S | 5 | 4.04 | 0.41 | -3.51 |
| IPI00032220 | Angiotensinogen precursor | R.EPTSTQQLNKPEVLEVTLNRPFLFAVYDQSATALHFLGR.V  | 4 | 6.76 | 0.53 | -4.42 |
| IPI00032220 | Angiotensinogen precursor | R.FM*QAVTGWK.T                               | 1 | 2.37 | 0.21 | -3.12 |
| IPI00032220 | Angiotensinogen precursor | R.FM*QAVTGWK.T                               | 2 | 3.01 | 0.29 | -2.60 |
| IPI00032220 | Angiotensinogen precursor | R.LDAHKVLSALQAVQGLLVAQGR.A                   | 2 | 7.59 | 0.66 | -5.25 |

|             |                           |                                             |   |      |      |       |
|-------------|---------------------------|---------------------------------------------|---|------|------|-------|
| IPI00032220 | Angiotensinogen precursor | R.LDAHKVLSALQAVQGLLVAQGR.A                  | 3 | 5.05 | 0.58 | -6.81 |
| IPI00032220 | Angiotensinogen precursor | R.LDAHKVLSALQAVQGLLVAQGR.A                  | 4 | 3.88 | 0.37 | -4.51 |
| IPI00032220 | Angiotensinogen precursor | R.LQALGVPWK.D                               | 2 | 3.65 | 0.36 | -1.98 |
| IPI00032220 | Angiotensinogen precursor | R.SLDFTELDVAAEK.I                           | 1 | 3.41 | 0.39 | -2.08 |
| IPI00032220 | Angiotensinogen precursor | R.SLDFTELDVAAEK.I                           | 2 | 5.25 | 0.47 | -5.58 |
| IPI00032220 | Angiotensinogen precursor | R.SLDFTELDVAAEK.I                           | 3 | 4.79 | 0.35 | -1.65 |
| IPI00032220 | Angiotensinogen precursor | R.SLDFTELDVAAEKIDR.F                        | 2 | 5.41 | 0.52 | -7.26 |
| IPI00032220 | Angiotensinogen precursor | R.SLDFTELDVAAEKIDR.F                        | 3 | 4.46 | 0.50 | -4.90 |
| IPI00032220 | Angiotensinogen precursor | R.TIHLTM*PQLVLQGSYDLQDLLAQAEIPAILHTELNLQK.L | 3 | 6.56 | 0.65 | -4.37 |
| IPI00032220 | Angiotensinogen precursor | R.TIHLTM*PQLVLQGSYDLQDLLAQAEIPAILHTELNLQK.L | 4 | 9.25 | 0.63 | -5.57 |
| IPI00032220 | Angiotensinogen precursor | R.TIHLTM*PQLVLQGSYDLQDLLAQAEIPAILHTELNLQK.L | 5 | 5.70 | 0.40 | -3.76 |
| IPI00032220 | Angiotensinogen precursor | R.TIHLTM*PQLVLQGSYDLQDLLAQAEIPAILHTELNLQK.L | 6 | 4.51 | 0.31 | -2.42 |
| IPI00032220 | Angiotensinogen precursor | R.VANPLSTA.-                                | 1 | 1.79 | 0.38 | -4.14 |
| IPI00032220 | Angiotensinogen precursor | R.VGEVLNSIFFELEADER.E                       | 2 | 5.99 | 0.55 | -6.94 |
| IPI00032220 | Angiotensinogen precursor | R.VGEVLNSIFFELEADER.E                       | 3 | 5.06 | 0.40 | -4.26 |
| IPI00032220 | Angiotensinogen precursor | R.VGEVLNSIFFELEADEREPTTESTQQLN.K            | 3 | 4.06 | 0.25 | -5.05 |
| IPI00032220 | Angiotensinogen precursor | R.VGEVLNSIFFELEADEREPTTESTQQLNKPEVLEVTLNR.P | 4 | 4.49 | 0.22 | -4.40 |
| IPI00032220 | Angiotensinogen precursor | S.LDFTELDVAAEKIDR.F                         | 2 | 3.50 | 0.45 | -3.69 |
| IPI00032220 | Angiotensinogen precursor | S.PVDEKALQDQLVLAOK.L                        | 3 | 4.85 | 0.51 | -2.89 |
| IPI00032220 | Angiotensinogen precursor | V.GVFTAPGLHLK.Q                             | 1 | 1.87 | 0.22 | 0.01  |
| IPI00032220 | Angiotensinogen precursor | V.LSALQAVQGLLVAQGR.A                        | 2 | 3.74 | 0.47 | -5.54 |
| IPI00032220 | Angiotensinogen precursor | V.LSALQAVQGLLVAQGR.A                        | 3 | 3.93 | 0.30 | -3.45 |
| IPI00032220 | Angiotensinogen precursor | V.VGVFTAPGLHLK.Q                            | 2 | 2.96 | 0.34 | -2.73 |
| IPI00032227 | Isoform 1 of Rabphilin-3A | K.HWYECLKNKDK.K                             | 2 | 3.39 | 0.19 |       |
| IPI00032227 | Isoform 1 of Rabphilin-3A | K.SNDYIGGCQLGISAKGERLKHWYECLK.N             | 3 | 3.49 | 0.19 |       |
| IPI00032258 | Complement C4-A precursor | A.PFLQALVR.E                                | 2 | 3.53 | 0.25 | -4.36 |
| IPI00032258 | Complement C4-A precursor | A.PKVVEEQESR.V                              | 2 | 3.04 | 0.29 | -1.03 |
| IPI00032258 | Complement C4-A precursor | D.DPDAPLQPVTPPLQLFEGR.R                     | 2 | 3.34 | 0.40 | -3.65 |
| IPI00032258 | Complement C4-A precursor | D.DPDAPLQPVTPPLQLFEGR.R                     | 3 | 4.88 | 0.46 | -2.11 |
| IPI00032258 | Complement C4-A precursor | D.HAVDLIQK.G                                | 2 | 2.94 | 0.27 | -0.14 |
| IPI00032258 | Complement C4-A precursor | D.PLDTLGSEGALSPGGVASLLR.L                   | 2 | 5.16 | 0.52 | -3.43 |
| IPI00032258 | Complement C4-A precursor | D.PLDTLGSEGALSPGGVASLLR.L                   | 3 | 5.06 | 0.42 | -2.98 |
| IPI00032258 | Complement C4-A precursor | E.APKVVEEQESR.V                             | 2 | 3.24 | 0.37 | -3.22 |
| IPI00032258 | Complement C4-A precursor | E.APKVVEEQESR.V                             | 3 | 3.64 | 0.30 | -2.42 |
| IPI00032258 | Complement C4-A precursor | F.LSCCQFAESLR.K                             | 2 | 3.54 | 0.35 | -2.59 |
| IPI00032258 | Complement C4-A precursor | K.ADGSYAAWLSR.D                             | 2 | 3.01 | 0.24 |       |
| IPI00032258 | Complement C4-A precursor | K.AEFQDALEK.L                               | 1 | 2.52 | 0.13 | -4.21 |
| IPI00032258 | Complement C4-A precursor | K.AEFQDALEK.L                               | 2 | 3.23 | 0.16 | -3.14 |
| IPI00032258 | Complement C4-A precursor | K.AEFQDALEKLNLM*GITDLQGLR.L                 | 2 | 4.80 | 0.57 | -3.22 |
| IPI00032258 | Complement C4-A precursor | K.AEFQDALEKLNLM*GITDLQGLR.L                 | 3 | 6.42 | 0.49 | -5.12 |
| IPI00032258 | Complement C4-A precursor | K.AEFQDALEKLNLM*GITDLQGLR.L                 | 4 | 4.59 | 0.32 | -2.23 |
| IPI00032258 | Complement C4-A precursor | K.AEFQDALEKLNMGITDLQGLR.L                   | 2 | 3.83 | 0.32 |       |

|             |                           |                                 |   |      |      |       |
|-------------|---------------------------|---------------------------------|---|------|------|-------|
| IPI00032258 | Complement C4-A precursor | K.AEFQDALEKLNMGITDLQGLR.L       | 3 | 5.14 | 0.35 | -4.61 |
| IPI00032258 | Complement C4-A precursor | K.AEM*ADQASAWLTR.Q              | 2 | 3.96 | 0.36 | -3.82 |
| IPI00032258 | Complement C4-A precursor | K.ANSFLGEK.A                    | 1 | 1.80 | 0.12 | -2.75 |
| IPI00032258 | Complement C4-A precursor | K.ANSFLGEK.A                    | 2 | 2.61 | 0.23 | -3.14 |
| IPI00032258 | Complement C4-A precursor | K.DDPDAPLQPVTPLQLFEGR.R         | 2 | 4.90 | 0.57 | -4.98 |
| IPI00032258 | Complement C4-A precursor | K.DDPDAPLQPVTPLQLFEGR.R         | 3 | 3.93 | 0.32 | -3.18 |
| IPI00032258 | Complement C4-A precursor | K.DDPDAPLQPVTPLQLFEGRR.N        | 3 | 2.03 | 0.14 | -4.63 |
| IPI00032258 | Complement C4-A precursor | K.DHAVDLIQK.G                   | 1 | 3.03 | 0.30 | -2.14 |
| IPI00032258 | Complement C4-A precursor | K.DHAVDLIQK.G                   | 2 | 2.76 | 0.32 | -2.89 |
| IPI00032258 | Complement C4-A precursor | K.DVKAANQM*R.N                  | 2 | 2.64 | 0.13 | -1.54 |
| IPI00032258 | Complement C4-A precursor | K.EGAIHREELVYELNPLDHR.G         | 2 | 4.35 | 0.44 | -4.58 |
| IPI00032258 | Complement C4-A precursor | K.EGAIHREELVYELNPLDHR.G         | 3 | 5.45 | 0.39 | -4.68 |
| IPI00032258 | Complement C4-A precursor | K.EGAIHREELVYELNPLDHR.G         | 4 | 2.47 | 0.18 | -2.23 |
| IPI00032258 | Complement C4-A precursor | K.EGAIHREELVYELNPLDHR.G         | 5 | 2.71 | 0.21 | -3.27 |
| IPI00032258 | Complement C4-A precursor | K.EGAIHREELVYELNPLDHRG.R        | 3 | 4.71 | 0.30 | -2.28 |
| IPI00032258 | Complement C4-A precursor | K.EVYM*PSSIFQDDFVIPDISEPGTWK.I  | 2 | 4.19 | 0.53 | -3.32 |
| IPI00032258 | Complement C4-A precursor | K.EVYM*PSSIFQDDFVIPDISEPGTWK.I  | 3 | 2.90 | 0.17 | -4.23 |
| IPI00032258 | Complement C4-A precursor | K.FACYYPV.V                     | 1 | 1.88 | 0.26 | -1.69 |
| IPI00032258 | Complement C4-A precursor | K.FACYYPV.V                     | 2 | 2.69 | 0.29 | -1.19 |
| IPI00032258 | Complement C4-A precursor | K.GLCVATPVQLR.V                 | 1 | 2.09 | 0.28 | -4.05 |
| IPI00032258 | Complement C4-A precursor | K.GLCVATPVQLR.V                 | 2 | 3.26 | 0.21 | -2.73 |
| IPI00032258 | Complement C4-A precursor | K.GSVFLRNPGR.N                  | 2 | 2.67 | 0.15 | -3.14 |
| IPI00032258 | Complement C4-A precursor | K.INVKVGGNSK.G                  | 2 | 2.52 | 0.17 | -2.51 |
| IPI00032258 | Complement C4-A precursor | K.ITPGKPYILTVPGHLD*QLDIQAR.Y    | 2 | 3.47 | 0.45 | -1.39 |
| IPI00032258 | Complement C4-A precursor | K.ITPGKPYILTVPGHLD*QLDIQAR.Y    | 3 | 4.87 | 0.51 | -4.46 |
| IPI00032258 | Complement C4-A precursor | K.ITPGKPYILTVPGHLD*QLDIQAR.Y    | 4 | 3.95 | 0.28 | -4.16 |
| IPI00032258 | Complement C4-A precursor | K.ITPGKPYILTVPGHLD*QLDIQAR.Y    | 3 | 4.61 | 0.41 |       |
| IPI00032258 | Complement C4-A precursor | K.ITQVLHFTK.D                   | 1 | 2.24 | 0.30 | -4.38 |
| IPI00032258 | Complement C4-A precursor | K.ITQVLHFTK.D                   | 2 | 3.30 | 0.38 | -3.07 |
| IPI00032258 | Complement C4-A precursor | K.ITQVLHFTKDVK.A                | 2 | 4.04 | 0.36 | -4.01 |
| IPI00032258 | Complement C4-A precursor | K.KEVYM*PSSIFQDDFVIPDISEPGTWK.I | 3 | 4.00 | 0.29 | -1.31 |
| IPI00032258 | Complement C4-A precursor | K.KYVLPNFEVK.I                  | 1 | 3.22 | 0.21 | -1.97 |
| IPI00032258 | Complement C4-A precursor | K.KYVLPNFEVK.I                  | 2 | 3.37 | 0.31 | -2.23 |
| IPI00032258 | Complement C4-A precursor | K.KYVLPNFEVK.I                  | 3 | 3.87 | 0.27 | -2.87 |
| IPI00032258 | Complement C4-A precursor | K.LELSVDGAK.Q                   | 1 | 2.07 | 0.11 | -3.30 |
| IPI00032258 | Complement C4-A precursor | K.LELSVDGAK.Q                   | 2 | 2.62 | 0.05 | -1.34 |
| IPI00032258 | Complement C4-A precursor | K.LGQYASPTAK.R                  | 1 | 2.38 | 0.30 | -3.94 |
| IPI00032258 | Complement C4-A precursor | K.LGQYASPTAK.R                  | 2 | 3.64 | 0.30 | -2.10 |
| IPI00032258 | Complement C4-A precursor | K.LGQYASPTAKR.C                 | 2 | 3.20 | 0.31 | -1.92 |
| IPI00032258 | Complement C4-A precursor | K.LHLETDSLALVALGALDTALYAAGSK.S  | 2 | 7.37 | 0.59 | -4.74 |
| IPI00032258 | Complement C4-A precursor | K.LHLETDSLALVALGALDTALYAAGSK.S  | 3 | 5.93 | 0.57 | -5.66 |
| IPI00032258 | Complement C4-A precursor | K.LHLETDSLALVALGALDTALYAAGSK.S  | 4 | 5.53 | 0.57 | -3.35 |

|             |                           |                                                  |   |      |      |       |
|-------------|---------------------------|--------------------------------------------------|---|------|------|-------|
| IPI00032258 | Complement C4-A precursor | K.LNM*GITDLQGLR.L                                | 2 | 3.92 | 0.39 | -2.16 |
| IPI00032258 | Complement C4-A precursor | K.LQETSNWLLSQQQADGSFQDPCPVLD.R.S                 | 3 | 4.75 | 0.45 | -5.13 |
| IPI00032258 | Complement C4-A precursor | K.LTSLSDRYVSHFETEGPHVLLYFDSVPTSR.E               | 3 | 7.13 | 0.54 | -4.58 |
| IPI00032258 | Complement C4-A precursor | K.LTSLSDRYVSHFETEGPHVLLYFDSVPTSR.E               | 4 | 4.45 | 0.37 | -4.48 |
| IPI00032258 | Complement C4-A precursor | K.LVNGQSHISLSK.A                                 | 1 | 2.64 | 0.24 | -2.75 |
| IPI00032258 | Complement C4-A precursor | K.LVNGQSHISLSK.A                                 | 2 | 3.80 | 0.42 | -2.64 |
| IPI00032258 | Complement C4-A precursor | K.LVNGQSHISLSKAEFQDALEK.L                        | 3 | 3.24 | 0.40 | -3.17 |
| IPI00032258 | Complement C4-A precursor | K.M*RPSTDTITVM*VENSHGLR.V                        | 2 | 1.97 | 0.31 | -5.48 |
| IPI00032258 | Complement C4-A precursor | K.M*RPSTDTITVM*VENSHGLR.V                        | 3 | 5.50 | 0.52 | -3.54 |
| IPI00032258 | Complement C4-A precursor | K.M*RPSTDTITVM*VENSHGLR.V                        | 4 | 4.69 | 0.46 | -3.02 |
| IPI00032258 | Complement C4-A precursor | K.PVQGVAYVR.F                                    | 1 | 2.57 | 0.14 | -3.21 |
| IPI00032258 | Complement C4-A precursor | K.QRVEASISK.A                                    | 2 | 2.72 | 0.08 | -2.72 |
| IPI00032258 | Complement C4-A precursor | K.RCCQDGVTR.L                                    | 2 | 2.98 | 0.12 |       |
| IPI00032258 | Complement C4-A precursor | K.RHLPVGPAPFLQALVR.E                             | 3 | 3.46 | 0.30 | -4.10 |
| IPI00032258 | Complement C4-A precursor | K.SCGLHQLLR.G                                    | 1 | 2.27 | 0.15 |       |
| IPI00032258 | Complement C4-A precursor | K.SCGLHQLLR.G                                    | 2 | 2.91 | 0.22 |       |
| IPI00032258 | Complement C4-A precursor | K.SHALQLNNR.Q                                    | 1 | 2.62 | 0.26 | -4.91 |
| IPI00032258 | Complement C4-A precursor | K.SHALQLNNR.Q                                    | 2 | 2.98 | 0.28 | -1.91 |
| IPI00032258 | Complement C4-A precursor | K.VDFTLSSER.D                                    | 1 | 2.05 | 0.17 | -3.10 |
| IPI00032258 | Complement C4-A precursor | K.VDFTLSSER.D                                    | 2 | 3.34 | 0.38 | -4.33 |
| IPI00032258 | Complement C4-A precursor | K.VDFTLSSERDFALLSLQVPLK.D                        | 3 | 3.10 | 0.18 | -3.13 |
| IPI00032258 | Complement C4-A precursor | K.VDFTLSSERDFALLSLQVPLKDAK.S                     | 2 | 3.81 | 0.45 | -2.80 |
| IPI00032258 | Complement C4-A precursor | K.VDFTLSSERDFALLSLQVPLKDAK.S                     | 3 | 5.14 | 0.47 | -7.67 |
| IPI00032258 | Complement C4-A precursor | K.VDFTLSSERDFALLSLQVPLKDAK.S                     | 4 | 3.73 | 0.47 | -4.64 |
| IPI00032258 | Complement C4-A precursor | K.VFEAM*NSYDLGCGPGGGDSALQVFQAAGLAFSDGDQWTLR.K    | 3 | 6.49 | 0.53 |       |
| IPI00032258 | Complement C4-A precursor | K.VFEAMNSYDLGCGPGGGDSALQVFQAAGLAFSDGDQWTLR.K     | 3 | 5.40 | 0.36 |       |
| IPI00032258 | Complement C4-A precursor | K.VGLSGM*AIADVTLLSGFHAR.A                        | 2 | 3.01 | 0.31 | 0.29  |
| IPI00032258 | Complement C4-A precursor | K.VGLSGM*AIADVTLLSGFHAR.A                        | 3 | 6.65 | 0.56 | -4.52 |
| IPI00032258 | Complement C4-A precursor | K.VGLSGM*AIADVTLLSGFHARADLEK.L                   | 4 | 4.38 | 0.43 | -2.71 |
| IPI00032258 | Complement C4-A precursor | K.VGLSGMAIADVTLLSGFHAR.A                         | 3 | 4.19 | 0.36 |       |
| IPI00032258 | Complement C4-A precursor | K.VLQIEKEGAIHR.E                                 | 2 | 4.22 | 0.27 | -4.02 |
| IPI00032258 | Complement C4-A precursor | K.VLQIEKEGAIHR.E                                 | 3 | 3.75 | 0.31 | -3.15 |
| IPI00032258 | Complement C4-A precursor | K.VLQIEKEGAIHREELVYELNPLDHR.G                    | 3 | 6.23 | 0.59 | -4.44 |
| IPI00032258 | Complement C4-A precursor | K.VLQIEKEGAIHREELVYELNPLDHR.G                    | 4 | 4.48 | 0.36 | -4.52 |
| IPI00032258 | Complement C4-A precursor | K.VLQIEKEGAIHREELVYELNPLDHR.G                    | 5 | 4.06 | 0.36 | -4.16 |
| IPI00032258 | Complement C4-A precursor | K.VLQIEKEGAIHREELVYELNPLDHR.G                    | 6 | 3.33 | 0.27 | -2.77 |
| IPI00032258 | Complement C4-A precursor | K.VLSLAQEQVGGGSPEK.L                             | 1 | 3.34 | 0.49 | -1.95 |
| IPI00032258 | Complement C4-A precursor | K.VLSLAQEQVGGGSPEK.L                             | 2 | 5.17 | 0.51 | -4.87 |
| IPI00032258 | Complement C4-A precursor | K.VLSLAQEQVGGGSPEK.L                             | 3 | 3.53 | 0.32 | -1.80 |
| IPI00032258 | Complement C4-A precursor | K.VLSLAQEQVGGGSPEKLQETSNWLLSQQQADGSFQDPCPVLD.R.S | 3 | 6.96 | 0.57 | -4.05 |
| IPI00032258 | Complement C4-A precursor | K.VLSLAQEQVGGGSPEKLQETSNWLLSQQQADGSFQDPCPVLD.R.S | 4 | 5.16 | 0.43 | -4.93 |
| IPI00032258 | Complement C4-A precursor | K.VLSLAQEQVGGGSPEKLQETSNWLLSQQQADGSFQDPCPVLD.R.S | 5 | 6.08 | 0.46 | -3.10 |

|             |                           |                                         |   |      |      |       |
|-------------|---------------------------|-----------------------------------------|---|------|------|-------|
| IPI00032258 | Complement C4-A precursor | K.YVLPNFEVK.I                           | 1 | 2.71 | 0.17 | -3.38 |
| IPI00032258 | Complement C4-A precursor | K.YVLPNFEVK.I                           | 2 | 2.55 | 0.19 | -1.83 |
| IPI00032258 | Complement C4-A precursor | L.GQYASPTAK.R                           | 1 | 1.90 | 0.19 | -2.03 |
| IPI00032258 | Complement C4-A precursor | L.SPGGVASLLR.L                          | 2 | 4.09 | 0.30 | -2.65 |
| IPI00032258 | Complement C4-A precursor | L.VNGQSHISLSK.A                         | 2 | 3.56 | 0.35 | -0.30 |
| IPI00032258 | Complement C4-A precursor | R.AACAQLNDFLQEYGTQGCQV.-                | 2 | 3.35 | 0.53 | -2.34 |
| IPI00032258 | Complement C4-A precursor | R.ADLEKLTSLSDR.Y                        | 2 | 3.07 | 0.34 | -2.75 |
| IPI00032258 | Complement C4-A precursor | R.ADLEKLTSLSDR.Y                        | 3 | 2.72 | 0.32 | -0.64 |
| IPI00032258 | Complement C4-A precursor | R.ADLEKLTSLSDRYVSHFETEGPHVLLYFDSVPTSR.E | 4 | 2.84 | 0.13 | -3.78 |
| IPI00032258 | Complement C4-A precursor | R.ALEILQEEDLIDEDDIPVR.S                 | 2 | 5.55 | 0.43 | -5.78 |
| IPI00032258 | Complement C4-A precursor | R.ALEILQEEDLIDEDDIPVR.S                 | 3 | 4.88 | 0.38 | -5.46 |
| IPI00032258 | Complement C4-A precursor | R.ALEILQEEDLIDEDDIPVRSFFPENWLWR.V       | 3 | 4.69 | 0.52 | -3.20 |
| IPI00032258 | Complement C4-A precursor | R.AVGSGATFSHYYYM*ILSR.G                 | 2 | 4.81 | 0.53 | -5.30 |
| IPI00032258 | Complement C4-A precursor | R.AVGSGATFSHYYYM*ILSR.G                 | 3 | 4.04 | 0.48 | -4.94 |
| IPI00032258 | Complement C4-A precursor | R.AVGSGATFSHYYYMILSR.G                  | 3 | 3.29 | 0.25 |       |
| IPI00032258 | Complement C4-A precursor | R.CSVFYGAPSK.S                          | 1 | 2.55 | 0.31 | -3.16 |
| IPI00032258 | Complement C4-A precursor | R.CSVFYGAPSK.S                          | 2 | 3.72 | 0.39 | -2.36 |
| IPI00032258 | Complement C4-A precursor | R.DFALLSLQVPLK.D                        | 2 | 4.18 | 0.45 | -4.86 |
| IPI00032258 | Complement C4-A precursor | R.DFALLSLQVPLKDAK.S                     | 2 | 4.57 | 0.46 | -4.35 |
| IPI00032258 | Complement C4-A precursor | R.DFALLSLQVPLKDAK.S                     | 3 | 3.48 | 0.43 | -3.14 |
| IPI00032258 | Complement C4-A precursor | R.DKGQAGLQR.A                           | 2 | 2.59 | 0.10 | -2.19 |
| IPI00032258 | Complement C4-A precursor | R.DSSTWLTAFLVK.V                        | 1 | 2.40 | 0.34 | -3.95 |
| IPI00032258 | Complement C4-A precursor | R.DSSTWLTAFLVK.V                        | 2 | 4.09 | 0.39 | -6.78 |
| IPI00032258 | Complement C4-A precursor | R.EAPKVVEEQESR.V                        | 1 | 2.24 | 0.07 |       |
| IPI00032258 | Complement C4-A precursor | R.EAPKVVEEQESR.V                        | 2 | 2.88 | 0.34 | -3.16 |
| IPI00032258 | Complement C4-A precursor | R.EAPKVVEEQESR.V                        | 3 | 2.63 | 0.22 | -2.45 |
| IPI00032258 | Complement C4-A precursor | R.ECVGFEAVQEVVGLVQPASATLYDYYPERR.R      | 2 | 4.27 | 0.49 |       |
| IPI00032258 | Complement C4-A precursor | R.ECVGFEAVQEVVGLVQPASATLYDYYPERR.R      | 3 | 4.22 | 0.31 | -3.37 |
| IPI00032258 | Complement C4-A precursor | R.ECVGFEAVQEVVGLVQPASATLYDYYPERR.C      | 3 | 6.63 | 0.58 | -5.53 |
| IPI00032258 | Complement C4-A precursor | R.ECVGFEAVQEVVGLVQPASATLYDYYPERR.C      | 4 | 4.03 | 0.46 | -3.98 |
| IPI00032258 | Complement C4-A precursor | R.ECVGFEAVQEVVGLVQPASATLYDYYPERR.C      | 5 | 2.74 | 0.24 | -2.59 |
| IPI00032258 | Complement C4-A precursor | R.EELVYELNPLDHR.G                       | 2 | 3.88 | 0.48 | -2.39 |
| IPI00032258 | Complement C4-A precursor | R.EFHLHLR.L                             | 1 | 2.09 | 0.11 | -4.66 |
| IPI00032258 | Complement C4-A precursor | R.EM*SGSPASGIPVK.V                      | 1 | 1.99 | 0.24 | -3.90 |
| IPI00032258 | Complement C4-A precursor | R.EM*SGSPASGIPVK.V                      | 2 | 2.30 | 0.12 | -3.94 |
| IPI00032258 | Complement C4-A precursor | R.EPFLSCCQFAESLR.K                      | 2 | 4.10 | 0.31 | -5.14 |
| IPI00032258 | Complement C4-A precursor | R.EPFLSCCQFAESLR.K                      | 3 | 4.17 | 0.26 |       |
| IPI00032258 | Complement C4-A precursor | R.EPFLSCCQFAESLR.K                      | 2 | 2.78 | 0.21 | -2.63 |
| IPI00032258 | Complement C4-A precursor | R.FGLLDEDGK.K                           | 2 | 3.33 | 0.14 | -3.04 |
| IPI00032258 | Complement C4-A precursor | R.FGLLDEDGK.K                           | 1 | 3.16 | 0.22 | -2.26 |
| IPI00032258 | Complement C4-A precursor | R.FGLLDEDGK.K                           | 2 | 3.16 | 0.21 | -1.47 |
| IPI00032258 | Complement C4-A precursor | R.FGLLDEDGKKTFFR.G                      | 2 | 4.33 | 0.50 | -4.76 |



|             |                           |                                     |   |      |      |       |
|-------------|---------------------------|-------------------------------------|---|------|------|-------|
| IPI00032258 | Complement C4-A precursor | R.FGLLEDGKKTFFR.G                   | 3 | 4.11 | 0.31 | -4.83 |
| IPI00032258 | Complement C4-A precursor | R.FGLLEDGKKTFFR.G                   | 4 | 3.11 | 0.18 | -4.04 |
| IPI00032258 | Complement C4-A precursor | R.FGLLEDGKKTFFRGLSESQTK.L           | 3 | 2.75 | 0.25 | -0.71 |
| IPI00032258 | Complement C4-A precursor | R.GCGEQTM*IYLAPTLAASR.Y             | 2 | 5.38 | 0.50 | -3.89 |
| IPI00032258 | Complement C4-A precursor | R.GCGEQTM*IYLAPTLAASR.Y             | 3 | 3.62 | 0.34 | -3.87 |
| IPI00032258 | Complement C4-A precursor | R.GCGEQTMIIYLAPTLAASR.Y             | 2 | 4.91 | 0.39 |       |
| IPI00032258 | Complement C4-A precursor | R.GHLFLQTDQPIYNPGR.V                | 2 | 6.47 | 0.60 | -4.40 |
| IPI00032258 | Complement C4-A precursor | R.GHLFLQTDQPIYNPGR.V                | 3 | 5.34 | 0.44 | -3.84 |
| IPI00032258 | Complement C4-A precursor | R.GLEELQFSLGSK.I                    | 1 | 3.08 | 0.37 | -4.48 |
| IPI00032258 | Complement C4-A precursor | R.GLEELQFSLGSK.I                    | 2 | 4.92 | 0.52 | -7.24 |
| IPI00032258 | Complement C4-A precursor | R.GLQDEDGYR.M                       | 1 | 1.85 | 0.22 | -4.44 |
| IPI00032258 | Complement C4-A precursor | R.GLQDEDGYR.M                       | 2 | 3.43 | 0.37 | -2.87 |
| IPI00032258 | Complement C4-A precursor | R.GLQDEDGYRM*K.F                    | 2 | 2.40 | 0.12 | -4.36 |
| IPI00032258 | Complement C4-A precursor | R.GPEVQLVAHSPWLK.D                  | 1 | 2.62 | 0.14 |       |
| IPI00032258 | Complement C4-A precursor | R.GPEVQLVAHSPWLK.D                  | 2 | 4.57 | 0.50 | -3.48 |
| IPI00032258 | Complement C4-A precursor | R.GPEVQLVAHSPWLK.D                  | 3 | 3.80 | 0.40 | -2.36 |
| IPI00032258 | Complement C4-A precursor | R.GPEVQLVAHSPWLKDSLRS.T             | 3 | 3.77 | 0.33 |       |
| IPI00032258 | Complement C4-A precursor | R.GPEVQLVAHSPWLKDSLRS.T             | 4 | 2.32 | 0.16 | -4.40 |
| IPI00032258 | Complement C4-A precursor | R.GQIVFM*NR.E                       | 2 | 2.63 | 0.24 | -1.45 |
| IPI00032258 | Complement C4-A precursor | R.GQIVFM*NREPK.R                    | 2 | 2.49 | 0.21 |       |
| IPI00032258 | Complement C4-A precursor | R.GRTLEIPGNSDPNM*IPDGFNSYVR.V       | 2 | 2.68 | 0.41 | -2.81 |
| IPI00032258 | Complement C4-A precursor | R.GRTLEIPGNSDPNM*IPDGFNSYVR.V       | 3 | 5.17 | 0.43 | -2.92 |
| IPI00032258 | Complement C4-A precursor | R.GSFEFPVGDAVSK.V                   | 1 | 2.92 | 0.49 | -2.86 |
| IPI00032258 | Complement C4-A precursor | R.GSFEFPVGDAVSK.V                   | 2 | 3.74 | 0.39 | -2.64 |
| IPI00032258 | Complement C4-A precursor | R.GSFEFPVGDAVSKVLQIEK.E             | 2 | 4.00 | 0.42 | -3.93 |
| IPI00032258 | Complement C4-A precursor | R.GSFEFPVGDAVSKVLQIEK.E             | 3 | 2.60 | 0.31 | -3.56 |
| IPI00032258 | Complement C4-A precursor | R.GSFEFPVGDAVSKVLQIEKEGAIHR.E       | 3 | 3.97 | 0.34 | -4.01 |
| IPI00032258 | Complement C4-A precursor | R.GSFEFPVGDAVSKVLQIEKEGAIHR.E       | 4 | 2.91 | 0.22 | -5.74 |
| IPI00032258 | Complement C4-A precursor | R.GSFEFPVGDAVSKVLQIEKEGAIHR.E       | 5 | 2.91 | 0.26 | -3.00 |
| IPI00032258 | Complement C4-A precursor | R.HLVPGAPFLLQALVR.E                 | 2 | 3.09 | 0.39 | -5.37 |
| IPI00032258 | Complement C4-A precursor | R.HLVPGAPFLLQALVR.E                 | 3 | 4.01 | 0.30 | -4.25 |
| IPI00032258 | Complement C4-A precursor | R.KADGSYAAWLSR.D                    | 2 | 3.86 | 0.37 | -4.03 |
| IPI00032258 | Complement C4-A precursor | R.KADGSYAAWLSR.D                    | 3 | 3.49 | 0.11 | -3.51 |
| IPI00032258 | Complement C4-A precursor | R.KKEVYM*PSSIFQDDFVIPDISEPGTWK.I    | 3 | 4.52 | 0.39 | -5.33 |
| IPI00032258 | Complement C4-A precursor | R.LLATLCSAEVCQCAEGK.C               | 2 | 5.88 | 0.56 | -6.70 |
| IPI00032258 | Complement C4-A precursor | R.LLATLCSAEVCQCAEGK.C               | 3 | 6.16 | 0.43 | -6.82 |
| IPI00032258 | Complement C4-A precursor | R.LLATLCSAEVCQCAEGKCPR.Q            | 3 | 2.96 | 0.16 |       |
| IPI00032258 | Complement C4-A precursor | R.LLLFSPSVVHLGVPL.S                 | 2 | 2.99 | 0.29 | -3.96 |
| IPI00032258 | Complement C4-A precursor | R.LLLFSPSVVHLGVPLSVGVQLQDVPR.G      | 2 | 4.47 | 0.64 | -1.36 |
| IPI00032258 | Complement C4-A precursor | R.LLLFSPSVVHLGVPLSVGVQLQDVPR.G      | 3 | 6.08 | 0.58 | -4.45 |
| IPI00032258 | Complement C4-A precursor | R.LLLFSPSVVHLGVPLSVGVQLQDVPR.G      | 4 | 3.95 | 0.40 | -2.47 |
| IPI00032258 | Complement C4-A precursor | R.LLLFSPSVVHLGVPLSVGVQLQDVPRGQVVK.G | 3 | 3.59 | 0.27 |       |

|             |                           |                                                   |   |      |      |       |
|-------------|---------------------------|---------------------------------------------------|---|------|------|-------|
| IPI00032258 | Complement C4-A precursor | R.LRLEPGKEYLIM*GLDGATYDLEGHPQYLLDSNSWIEEM*PSEER.L | 4 | 4.21 | 0.35 | -3.19 |
| IPI00032258 | Complement C4-A precursor | R.LTVAAPPSGGPGFLSIER.P                            | 2 | 4.29 | 0.44 | -4.43 |
| IPI00032258 | Complement C4-A precursor | R.LTVAAPPSGGPGFLSIERPDSRPPR.V                     | 2 | 2.42 | 0.25 | -3.99 |
| IPI00032258 | Complement C4-A precursor | R.LTVAAPPSGGPGFLSIERPDSRPPR.V                     | 3 | 2.34 | 0.17 | -2.13 |
| IPI00032258 | Complement C4-A precursor | R.LTVAAPPSGGPGFLSIERPDSRPPR.V                     | 4 | 2.19 | 0.18 | -3.67 |
| IPI00032258 | Complement C4-A precursor | R.M*KFACYYP.V                                     | 2 | 2.54 | 0.10 |       |
| IPI00032258 | Complement C4-A precursor | R.NGESVKLHLETDSLALVALGALDTALYAAGSK.S              | 3 | 3.44 | 0.36 | -6.33 |
| IPI00032258 | Complement C4-A precursor | R.NGESVKLHLETDSLALVALGALDTALYAAGSK.S              | 4 | 4.01 | 0.25 | -3.24 |
| IPI00032258 | Complement C4-A precursor | R.NGFKSHALQLNNR.Q                                 | 3 | 3.18 | 0.31 | -2.45 |
| IPI00032258 | Complement C4-A precursor | R.PVAFSVVPTAAAAVSLK.V                             | 2 | 4.50 | 0.50 | -5.05 |
| IPI00032258 | Complement C4-A precursor | R.PVAFSVVPTAAAAVSLK.V                             | 3 | 4.18 | 0.38 | -3.45 |
| IPI00032258 | Complement C4-A precursor | R.QGSFQGGFR.S                                     | 1 | 1.45 | 0.05 | -3.46 |
| IPI00032258 | Complement C4-A precursor | R.QGSFQGGFR.S                                     | 2 | 2.28 | 0.34 | -2.13 |
| IPI00032258 | Complement C4-A precursor | R.RCSVFGAPSK.S                                    | 2 | 3.45 | 0.20 |       |
| IPI00032258 | Complement C4-A precursor | R.RGHLFLQTDQPIYNPGQR.V                            | 2 | 4.58 | 0.46 | -4.28 |
| IPI00032258 | Complement C4-A precursor | R.RGHLFLQTDQPIYNPGQR.V                            | 3 | 4.79 | 0.33 | -4.04 |
| IPI00032258 | Complement C4-A precursor | R.RGHLFLQTDQPIYNPGQR.V                            | 4 | 2.32 | 0.16 | -3.53 |
| IPI00032258 | Complement C4-A precursor | R.SFFPENWLWR.V                                    | 1 | 2.05 | 0.24 | -2.53 |
| IPI00032258 | Complement C4-A precursor | R.SFFPENWLWR.V                                    | 2 | 3.48 | 0.34 | -4.33 |
| IPI00032258 | Complement C4-A precursor | R.SM*QGGLVGNDETVALTAFVTIALHHGLAVFQDEGAEPLK.Q      | 3 | 6.29 | 0.60 | -2.32 |
| IPI00032258 | Complement C4-A precursor | R.SM*QGGLVGNDETVALTAFVTIALHHGLAVFQDEGAEPLK.Q      | 4 | 6.42 | 0.50 | -8.14 |
| IPI00032258 | Complement C4-A precursor | R.SM*QGGLVGNDETVALTAFVTIALHHGLAVFQDEGAEPLKQR.V    | 3 | 4.14 | 0.45 | -5.18 |
| IPI00032258 | Complement C4-A precursor | R.SM*QGGLVGNDETVALTAFVTIALHHGLAVFQDEGAEPLKQR.V    | 4 | 5.33 | 0.48 | -4.07 |
| IPI00032258 | Complement C4-A precursor | R.SM*QGGLVGNDETVALTAFVTIALHHGLAVFQDEGAEPLKQR.V    | 5 | 4.32 | 0.39 | -3.55 |
| IPI00032258 | Complement C4-A precursor | R.STQDTVIALDALSAYWIASHTTEER.G                     | 2 | 5.04 | 0.55 | -3.85 |
| IPI00032258 | Complement C4-A precursor | R.STQDTVIALDALSAYWIASHTTEER.G                     | 3 | 5.04 | 0.49 | -4.72 |
| IPI00032258 | Complement C4-A precursor | R.STQDTVIALDALSAYWIASHTTEER.G                     | 3 | 3.66 | 0.35 | -3.92 |
| IPI00032258 | Complement C4-A precursor | R.TLEIPGNSDPNM*IPDGFNSYVR.V                       | 2 | 4.01 | 0.46 | -5.73 |
| IPI00032258 | Complement C4-A precursor | R.TLEIPGNSDPNM*IPDGFNSYVR.V                       | 3 | 3.90 | 0.23 | -6.50 |
| IPI00032258 | Complement C4-A precursor | R.TTNIQGINLLFSSR.R                                | 1 | 2.76 | 0.37 | -2.92 |
| IPI00032258 | Complement C4-A precursor | R.TTNIQGINLLFSSR.R                                | 2 | 4.92 | 0.49 | -5.94 |
| IPI00032258 | Complement C4-A precursor | R.TTNIQGINLLFSSR.R                                | 3 | 3.10 | 0.21 | -1.09 |
| IPI00032258 | Complement C4-A precursor | R.TTNIQGINLLFSSRR.G                               | 3 | 1.87 | 0.16 | -3.72 |
| IPI00032258 | Complement C4-A precursor | R.TYNVLDM*K.N                                     | 1 | 2.12 | 0.06 | -3.59 |
| IPI00032258 | Complement C4-A precursor | R.TYNVLDM*K.N                                     | 2 | 3.22 | 0.28 | -0.99 |
| IPI00032258 | Complement C4-A precursor | R.VDVQAGACEGK.L                                   | 2 | 3.75 | 0.38 | -3.30 |
| IPI00032258 | Complement C4-A precursor | R.VDVQAGACEGKLELSVDGAK.Q                          | 2 | 5.46 | 0.53 | -5.36 |
| IPI00032258 | Complement C4-A precursor | R.VDVQAGACEGKLELSVDGAK.Q                          | 3 | 4.72 | 0.49 | -4.50 |
| IPI00032258 | Complement C4-A precursor | R.VEASISK.A                                       | 1 | 2.35 | 0.16 | -2.43 |
| IPI00032258 | Complement C4-A precursor | R.VEASISKANSFLGEK.A                               | 2 | 3.61 | 0.38 | -2.51 |
| IPI00032258 | Complement C4-A precursor | R.VEASISKANSFLGEK.A                               | 3 | 2.97 | 0.21 |       |
| IPI00032258 | Complement C4-A precursor | R.VEYGFQVK.V                                      | 1 | 2.17 | 0.15 | -3.54 |

|             |                                             |                                    |   |      |      |       |
|-------------|---------------------------------------------|------------------------------------|---|------|------|-------|
| IPI00032258 | Complement C4-A precursor                   | R.VEYGFQVK.V                       | 2 | 2.70 | 0.29 | -2.50 |
| IPI00032258 | Complement C4-A precursor                   | R.VFALDQK.M                        | 1 | 2.15 | 0.11 | -3.54 |
| IPI00032258 | Complement C4-A precursor                   | R.VFALDQK.M                        | 2 | 2.72 | 0.12 | -4.54 |
| IPI00032258 | Complement C4-A precursor                   | R.VFREFHLHLR.L                     | 3 | 3.52 | 0.16 | -2.35 |
| IPI00032258 | Complement C4-A precursor                   | R.VGDTLNLNLR.A                     | 1 | 2.45 | 0.19 | -3.63 |
| IPI00032258 | Complement C4-A precursor                   | R.VGDTLNLNLR.A                     | 2 | 3.88 | 0.28 | -4.23 |
| IPI00032258 | Complement C4-A precursor                   | R.VQQPDCREPFLSCCQFAESLR.K          | 2 | 3.08 | 0.31 |       |
| IPI00032258 | Complement C4-A precursor                   | R.VQQPDCREPFLSCCQFAESLR.K          | 3 | 5.06 | 0.53 | -2.44 |
| IPI00032258 | Complement C4-A precursor                   | R.VQQPDCREPFLSCCQFAESLRK.K         | 3 | 5.12 | 0.27 |       |
| IPI00032258 | Complement C4-A precursor                   | R.VTASDPLDTLGSEGALSPGGVASLLR.L     | 2 | 6.71 | 0.56 | -5.11 |
| IPI00032258 | Complement C4-A precursor                   | R.VTASDPLDTLGSEGALSPGGVASLLR.L     | 3 | 7.64 | 0.51 | -6.95 |
| IPI00032258 | Complement C4-A precursor                   | R.VTASDPLDTLGSEGALSPGGVASLLR.LPR.G | 3 | 4.78 | 0.50 | -3.68 |
| IPI00032258 | Complement C4-A precursor                   | R.VTASDPLDTLGSEGALSPGGVASLLR.LPR.G | 4 | 3.56 | 0.41 | -3.75 |
| IPI00032258 | Complement C4-A precursor                   | R.YIYGKPVQGVAY.V                   | 2 | 3.06 | 0.41 | -3.37 |
| IPI00032258 | Complement C4-A precursor                   | R.YIYGKPVQGVAYVR.F                 | 2 | 4.19 | 0.54 | -4.05 |
| IPI00032258 | Complement C4-A precursor                   | R.YIYGKPVQGVAYVR.F                 | 3 | 3.33 | 0.48 | -2.45 |
| IPI00032258 | Complement C4-A precursor                   | R.YLDKTEQWSTLPPETK.D               | 2 | 3.68 | 0.45 | -4.38 |
| IPI00032258 | Complement C4-A precursor                   | R.YLDKTEQWSTLPPETK.D               | 3 | 3.49 | 0.28 | -2.04 |
| IPI00032258 | Complement C4-A precursor                   | R.YRVFALDQK.M                      | 1 | 2.09 | 0.16 | -2.31 |
| IPI00032258 | Complement C4-A precursor                   | R.YRVFALDQK.M                      | 2 | 2.64 | 0.14 | -0.54 |
| IPI00032258 | Complement C4-A precursor                   | R.YVSHFETEGPHVLLYFDSVPTSR.E        | 2 | 5.75 | 0.62 | -4.15 |
| IPI00032258 | Complement C4-A precursor                   | R.YVSHFETEGPHVLLYFDSVPTSR.E        | 3 | 5.10 | 0.55 | -6.74 |
| IPI00032258 | Complement C4-A precursor                   | S.PGGVASLLR.L                      | 2 | 3.15 | 0.15 | -3.95 |
| IPI00032258 | Complement C4-A precursor                   | T.PGKPYILTVPGHLDLDEM*QLDIQAR.Y     | 3 | 4.71 | 0.40 | -2.09 |
| IPI00032258 | Complement C4-A precursor                   | V.DFTLSSERDFALLSLQVPLKDAK.S        | 3 | 4.21 | 0.29 | -2.73 |
| IPI00032258 | Complement C4-A precursor                   | V.GSGATFSHYYYM*ILSR.G              | 2 | 3.83 | 0.43 | -4.82 |
| IPI00032258 | Complement C4-A precursor                   | V.PGAPFLQALVR.E                    | 1 | 2.24 | 0.19 | -4.50 |
| IPI00032258 | Complement C4-A precursor                   | W.YFVSSPFLDLK.T                    | 2 | 3.03 | 0.25 | -0.93 |
| IPI00032258 | Complement C4-A precursor                   | Y.ILTVPGLHDEM*QLDIQAR.Y            | 2 | 3.61 | 0.28 | -1.12 |
| IPI00032288 | MANSC domain-containing protein 1 precursor | K.FGSSDHLEK.L                      | 2 | 2.76 | 0.18 | -2.16 |
| IPI00032288 | MANSC domain-containing protein 1 precursor | K.M*DEASAQLLAYK.E                  | 2 | 3.88 | 0.42 | -3.09 |
| IPI00032288 | MANSC domain-containing protein 1 precursor | K.M*DEASAQLLAYKEK.G                | 2 | 3.87 | 0.39 | -2.43 |
| IPI00032288 | MANSC domain-containing protein 1 precursor | K.M*DEASAQLLAYKEK.G                | 3 | 3.64 | 0.41 | -0.91 |
| IPI00032288 | MANSC domain-containing protein 1 precursor | K.SLEDVVIDIQSSLSK.G                | 2 | 5.24 | 0.36 | -4.24 |
| IPI00032288 | MANSC domain-containing protein 1 precursor | K.SLEDVVIDIQSSLSK.G                | 3 | 5.48 | 0.34 | -2.86 |
| IPI00032288 | MANSC domain-containing protein 1 precursor | R.IITDFPSLTR.N                     | 2 | 1.52 | 0.07 | -4.33 |
| IPI00032291 | Complement C5 precursor                     | K.AFTECCVVASQLR.A                  | 2 | 4.02 | 0.41 | -2.94 |
| IPI00032291 | Complement C5 precursor                     | K.ALLVGEHLNIIVTPK.S                | 3 | 3.28 | 0.36 | -1.73 |
| IPI00032291 | Complement C5 precursor                     | K.ALVEGVLDLFTDYQIK.D               | 2 | 5.14 | 0.50 | -5.57 |
| IPI00032291 | Complement C5 precursor                     | K.ATLLDIYK.T                       | 2 | 1.88 | 0.09 | -2.43 |
| IPI00032291 | Complement C5 precursor                     | K.CCYDGACVNNDETCEQR.A              | 2 | 6.02 | 0.65 | -4.87 |
| IPI00032291 | Complement C5 precursor                     | K.DGHVILQLNSIPSSDFLCVR.F           | 3 | 2.74 | 0.08 | -3.38 |

|             |                         |                                      |   |      |      |       |
|-------------|-------------------------|--------------------------------------|---|------|------|-------|
| IPI00032291 | Complement C5 precursor | K.DINYVNPVIK.W                       | 1 | 3.39 | 0.28 | -2.26 |
| IPI00032291 | Complement C5 precursor | K.DINYVNPVIK.W                       | 2 | 3.27 | 0.26 | -1.09 |
| IPI00032291 | Complement C5 precursor | K.DNLQHKDSSVPNTGTAR.M                | 3 | 3.82 | 0.27 | -4.21 |
| IPI00032291 | Complement C5 precursor | K.DSEITFIKK.V                        | 2 | 2.16 | 0.17 | -1.12 |
| IPI00032291 | Complement C5 precursor | K.DSLDQLVGGVPVTLNAQTIDVNQETSDDLDPK.S | 3 | 2.67 | 0.14 | -4.63 |
| IPI00032291 | Complement C5 precursor | K.DSSVPNTGTAR.M                      | 1 | 1.99 | 0.11 | -1.97 |
| IPI00032291 | Complement C5 precursor | K.DSSVPNTGTAR.M                      | 2 | 2.50 | 0.13 | -1.01 |
| IPI00032291 | Complement C5 precursor | K.EFPYRIPLDLVPKTEIKR.I               | 4 | 2.42 | 0.22 | -2.30 |
| IPI00032291 | Complement C5 precursor | K.ENSQYQPIKLGQTLPEAR.E               | 3 | 3.34 | 0.28 | -2.68 |
| IPI00032291 | Complement C5 precursor | K.FQNSAILTIQPK.Q                     | 2 | 4.71 | 0.37 | -1.77 |
| IPI00032291 | Complement C5 precursor | K.FSDASYQSINIPVTQNM*VPSSR.L          | 2 | 4.07 | 0.53 | -4.11 |
| IPI00032291 | Complement C5 precursor | K.FSDASYQSINIPVTQNM*VPSSR.L          | 3 | 3.91 | 0.46 | -3.20 |
| IPI00032291 | Complement C5 precursor | K.GGSASTWLTAFALR.V                   | 2 | 4.62 | 0.42 | -0.74 |
| IPI00032291 | Complement C5 precursor | K.GTVVNYR.T                          | 2 | 2.31 | 0.29 | -1.46 |
| IPI00032291 | Complement C5 precursor | K.IDTQDIEASHYR.G                     | 2 | 3.96 | 0.47 | -1.23 |
| IPI00032291 | Complement C5 precursor | K.IDTQDIEASHYR.G                     | 3 | 2.71 | 0.15 | -1.31 |
| IPI00032291 | Complement C5 precursor | K.ITHYNYLILSK.G                      | 2 | 3.91 | 0.34 | -2.90 |
| IPI00032291 | Complement C5 precursor | K.KIEEIAAK.Y                         | 1 | 2.09 | 0.08 | -3.90 |
| IPI00032291 | Complement C5 precursor | K.KIEEIAAK.Y                         | 2 | 2.74 | 0.07 | -3.30 |
| IPI00032291 | Complement C5 precursor | K.LNLVATPLFLKPGIPYPIK.V              | 3 | 4.09 | 0.45 | -2.97 |
| IPI00032291 | Complement C5 precursor | K.LNLVATPLFLKPGIPYPIKVQVK.D          | 3 | 3.68 | 0.44 | -4.26 |
| IPI00032291 | Complement C5 precursor | K.LNLVATPLFLKPGIPYPIKVQVK.D          | 4 | 3.00 | 0.40 | -4.69 |
| IPI00032291 | Complement C5 precursor | K.LQGTLPEAR.E                        | 2 | 2.85 | 0.29 | -2.38 |
| IPI00032291 | Complement C5 precursor | K.M*SAVEGICTSESPVIDHQGTK.S           | 3 | 3.08 | 0.32 | -2.95 |
| IPI00032291 | Complement C5 precursor | K.NFKNFEITIK.A                       | 3 | 2.46 | 0.07 | -1.51 |
| IPI00032291 | Complement C5 precursor | K.QCTM*FYSTSNIK.I                    | 2 | 3.09 | 0.43 | -1.53 |
| IPI00032291 | Complement C5 precursor | K.QLPGGQNPVSYVYLEVVSK.H              | 2 | 4.11 | 0.53 | -3.94 |
| IPI00032291 | Complement C5 precursor | K.QLPGGQNPVSYVYLEVVSK.H              | 3 | 3.46 | 0.38 | -3.78 |
| IPI00032291 | Complement C5 precursor | K.RM*PITYDNGFLFIHTDKPVYTPDQSVK.V     | 4 | 3.94 | 0.27 | -4.46 |
| IPI00032291 | Complement C5 precursor | K.SPYIDKITHYNYLILSK.G                | 2 | 5.16 | 0.41 | -2.65 |
| IPI00032291 | Complement C5 precursor | K.SPYIDKITHYNYLILSK.G                | 3 | 4.00 | 0.34 | -3.30 |
| IPI00032291 | Complement C5 precursor | K.SPYIDKITHYNYLILSK.G                | 4 | 3.64 | 0.31 | 0.72  |
| IPI00032291 | Complement C5 precursor | K.TDAPDLPEENQAR.E                    | 2 | 3.94 | 0.37 | -3.97 |
| IPI00032291 | Complement C5 precursor | K.TGEVAEKDSEITFIK.K                  | 2 | 4.75 | 0.43 | -2.18 |
| IPI00032291 | Complement C5 precursor | K.TGEVAEKDSEITFIK.K                  | 3 | 3.31 | 0.35 | -2.00 |
| IPI00032291 | Complement C5 precursor | K.TGEVAEKDSEITFIKK.V                 | 2 | 5.30 | 0.54 | -3.80 |
| IPI00032291 | Complement C5 precursor | K.TGEVAEKDSEITFIKK.V                 | 3 | 4.59 | 0.49 | -2.56 |
| IPI00032291 | Complement C5 precursor | K.TGEVAEKDSEITFIKK.V                 | 4 | 3.16 | 0.25 | -3.10 |
| IPI00032291 | Complement C5 precursor | K.TLLPVSKPEIR.S                      | 2 | 2.58 | 0.21 | -2.16 |
| IPI00032291 | Complement C5 precursor | K.VFKDVLEM*NIPYSVVR.G                | 2 | 5.44 | 0.43 | -2.79 |
| IPI00032291 | Complement C5 precursor | K.VFKDVLEM*NIPYSVVR.G                | 3 | 5.03 | 0.34 | -1.92 |
| IPI00032291 | Complement C5 precursor | K.VFKDVLEM*NIPYSVVRGEQIQLK.G         | 3 | 4.21 | 0.42 | -3.36 |

|             |                                         |                                              |   |      |      |       |
|-------------|-----------------------------------------|----------------------------------------------|---|------|------|-------|
| IPI00032291 | Complement C5 precursor                 | K.VSITSITVENVFK.Y                            | 2 | 4.10 | 0.46 | -4.14 |
| IPI00032291 | Complement C5 precursor                 | K.VTCTNAELVK.G                               | 2 | 2.70 | 0.26 | -1.83 |
| IPI00032291 | Complement C5 precursor                 | K.YKATLLDIYK.T                               | 2 | 2.56 | 0.28 | -3.43 |
| IPI00032291 | Complement C5 precursor                 | K.YKATLLDIYK.T                               | 3 | 3.02 | 0.17 | -3.96 |
| IPI00032291 | Complement C5 precursor                 | K.YKATLLDIYKTGEAFAEKDSEITFIK.K               | 3 | 5.21 | 0.59 | -3.75 |
| IPI00032291 | Complement C5 precursor                 | K.YKATLLDIYKTGEAFAEKDSEITFIK.K               | 4 | 3.11 | 0.12 | -4.11 |
| IPI00032291 | Complement C5 precursor                 | K.YKATLLDIYKTGEAFAEKDSEITFIK.K               | 5 | 3.15 | 0.21 | -4.17 |
| IPI00032291 | Complement C5 precursor                 | K.YKATLLDIYKTGEAFAEKDSEITFIKK.V              | 5 | 4.14 | 0.29 | -2.39 |
| IPI00032291 | Complement C5 precursor                 | K.YNFSFR.Y                                   | 1 | 1.42 | 0.16 | -2.03 |
| IPI00032291 | Complement C5 precursor                 | K.YNFSFR.Y                                   | 2 | 1.85 | 0.20 | -2.23 |
| IPI00032291 | Complement C5 precursor                 | K.YVLSPYK.L                                  | 1 | 1.99 | 0.18 | -1.91 |
| IPI00032291 | Complement C5 precursor                 | R.EKFSDASYQSINIPVTQNM*VPSSR.L                | 3 | 5.27 | 0.48 | -2.26 |
| IPI00032291 | Complement C5 precursor                 | R.ESYSGVTLDP.R                               | 2 | 2.42 | 0.25 | -2.33 |
| IPI00032291 | Complement C5 precursor                 | R.ETVLTFFIDPEGSEVDM*VEEIDHIGIISFPDFK.I       | 3 | 4.05 | 0.38 | -5.95 |
| IPI00032291 | Complement C5 precursor                 | R.ETVLTFFIDPEGSEVDM*VEEIDHIGIISFPDFKIPSNPR.Y | 4 | 3.42 | 0.29 | -4.20 |
| IPI00032291 | Complement C5 precursor                 | R.IPLDLVPK.T                                 | 2 | 2.40 | 0.23 | -2.93 |
| IPI00032291 | Complement C5 precursor                 | R.LSM*DIVSYK.H                               | 2 | 2.78 | 0.27 | -2.01 |
| IPI00032291 | Complement C5 precursor                 | R.M*PITYDNGFLFIHTDKPVYTPDQSVK.V              | 3 | 5.38 | 0.56 | -1.62 |
| IPI00032291 | Complement C5 precursor                 | R.M*VETTAYALLTSLNLK.D                        | 2 | 4.88 | 0.43 | -3.94 |
| IPI00032291 | Complement C5 precursor                 | R.M*VETTAYALLTSLNLK.D                        | 3 | 4.00 | 0.34 | -3.37 |
| IPI00032291 | Complement C5 precursor                 | R.M*VETTAYALLTSLNLKDINYVNPVIK.W              | 3 | 7.36 | 0.60 | -3.81 |
| IPI00032291 | Complement C5 precursor                 | R.M*VETTAYALLTSLNLKDINYVNPVIK.W              | 4 | 4.79 | 0.31 | -3.37 |
| IPI00032291 | Complement C5 precursor                 | R.NADYSYSVWK.G                               | 2 | 2.68 | 0.20 | -3.19 |
| IPI00032291 | Complement C5 precursor                 | R.SIVSALKR.E                                 | 2 | 2.12 | 0.17 | -2.44 |
| IPI00032291 | Complement C5 precursor                 | R.VVPEGVKR.E                                 | 2 | 1.57 | 0.07 | -1.94 |
| IPI00032291 | Complement C5 precursor                 | R.VYSLNDDLKPAKR.E                            | 2 | 4.51 | 0.41 | -3.78 |
| IPI00032291 | Complement C5 precursor                 | R.YGGGFYSTQDTINAIEGLTEYSLLVK.Q               | 2 | 5.50 | 0.64 | -4.40 |
| IPI00032291 | Complement C5 precursor                 | R.YGGGFYSTQDTINAIEGLTEYSLLVK.Q               | 3 | 5.71 | 0.50 | -9.09 |
| IPI00032291 | Complement C5 precursor                 | R.YIYPLDSLTIWIEWPR.D                         | 2 | 4.47 | 0.52 | -4.43 |
| IPI00032291 | Complement C5 precursor                 | R.YIYPLDSLTIWIEWPR.D                         | 3 | 3.58 | 0.21 | -4.40 |
| IPI00032292 | Metalloproteinase inhibitor 1 precursor | K.GFQALGDAADIR.F                             | 1 | 2.23 | 0.15 | -2.08 |
| IPI00032292 | Metalloproteinase inhibitor 1 precursor | K.GFQALGDAADIR.F                             | 2 | 4.00 | 0.33 | -2.13 |
| IPI00032292 | Metalloproteinase inhibitor 1 precursor | K.LQDGLLHITTCFVAPWNSLSLAQR.R                 | 2 | 4.85 | 0.50 | -3.41 |
| IPI00032292 | Metalloproteinase inhibitor 1 precursor | K.LQDGLLHITTCFVAPWNSLSLAQR.R                 | 3 | 4.86 | 0.30 | -3.51 |
| IPI00032292 | Metalloproteinase inhibitor 1 precursor | K.LQSGTHCLWTDQLLQSGEK.G                      | 3 | 3.19 | 0.20 |       |
| IPI00032292 | Metalloproteinase inhibitor 1 precursor | K.M*YKGFQALGDAADIR.F                         | 2 | 3.71 | 0.40 | -4.34 |
| IPI00032292 | Metalloproteinase inhibitor 1 precursor | K.M*YKGFQALGDAADIR.F                         | 3 | 2.81 | 0.20 | -1.75 |
| IPI00032292 | Metalloproteinase inhibitor 1 precursor | K.TYTVGCEECTVFPCLSIK.L                       | 2 | 3.94 | 0.49 | -3.26 |
| IPI00032292 | Metalloproteinase inhibitor 1 precursor | R.EPGLCTWQSLR.S                              | 2 | 2.34 | 0.29 | -2.82 |
| IPI00032292 | Metalloproteinase inhibitor 1 precursor | R.FVYTPAM*ESVCGYFHR.S                        | 2 | 3.62 | 0.40 |       |
| IPI00032292 | Metalloproteinase inhibitor 1 precursor | R.SEEFLIAGK.L                                | 2 | 3.08 | 0.20 | -2.27 |
| IPI00032293 | Cystatin-C precursor                    | A.AGSSPGKPPR.L                               | 1 | 1.91 | 0.23 | -0.69 |

|             |                      |                           |   |      |      |       |
|-------------|----------------------|---------------------------|---|------|------|-------|
| IPI00032293 | Cystatin-C precursor | A.FCSFQIYAVPWQGTMTLSK.S   | 2 | 5.14 | 0.55 | -4.87 |
| IPI00032293 | Cystatin-C precursor | A.FCSFQIYAVPWQGTMTLSK.S   | 3 | 4.55 | 0.36 | -3.55 |
| IPI00032293 | Cystatin-C precursor | A.GSSPGKPPR.L             | 1 | 1.89 | 0.17 | -0.66 |
| IPI00032293 | Cystatin-C precursor | A.GVNYFLDVELGR.T          | 2 | 3.69 | 0.32 | -6.69 |
| IPI00032293 | Cystatin-C precursor | A.LDFAVGEYNK.A            | 1 | 2.41 | 0.25 | -4.01 |
| IPI00032293 | Cystatin-C precursor | A.LDFAVGEYNK.A            | 2 | 3.31 | 0.41 | -4.70 |
| IPI00032293 | Cystatin-C precursor | A.VSPAAGSSPGKPPR.L        | 1 | 3.65 | 0.38 | 0.34  |
| IPI00032293 | Cystatin-C precursor | A.VSPAAGSSPGKPPR.L        | 2 | 3.47 | 0.49 | -3.43 |
| IPI00032293 | Cystatin-C precursor | C.PFHDQPHLK.R             | 2 | 3.13 | 0.29 | -1.17 |
| IPI00032293 | Cystatin-C precursor | C.SFQIYAVPWQGTMTLSK.S     | 2 | 5.08 | 0.42 | -4.25 |
| IPI00032293 | Cystatin-C precursor | C.SFQIYAVPWQGTMTLSK.S     | 2 | 4.65 | 0.47 | -4.21 |
| IPI00032293 | Cystatin-C precursor | F.CSFQIYAVPWQGTMTLSK.S    | 2 | 4.32 | 0.44 | -3.71 |
| IPI00032293 | Cystatin-C precursor | F.QIYAVPWQGTMTLSK.S       | 2 | 3.01 | 0.35 | -2.77 |
| IPI00032293 | Cystatin-C precursor | G.GPM*DASVEEEGVR.R        | 2 | 3.85 | 0.36 | -3.93 |
| IPI00032293 | Cystatin-C precursor | G.PM*DASVEEEGVR.R         | 2 | 4.03 | 0.37 | -2.02 |
| IPI00032293 | Cystatin-C precursor | G.VNYFLDVELGR.T           | 2 | 3.83 | 0.41 | -4.09 |
| IPI00032293 | Cystatin-C precursor | K.AFCSFQIYAVPWQGTMTLSK.S  | 2 | 4.77 | 0.55 | -6.47 |
| IPI00032293 | Cystatin-C precursor | K.AFCSFQIYAVPWQGTMTLSK.S  | 3 | 6.22 | 0.50 | -5.58 |
| IPI00032293 | Cystatin-C precursor | K.AFCSFQIYAVPWQGTMTLSK.S  | 2 | 5.01 | 0.60 | -4.51 |
| IPI00032293 | Cystatin-C precursor | K.AFCSFQIYAVPWQGTMTLSK.S  | 3 | 4.96 | 0.46 | -3.85 |
| IPI00032293 | Cystatin-C precursor | K.QIVAGVNY.F              | 1 | 2.30 | 0.32 | -2.75 |
| IPI00032293 | Cystatin-C precursor | K.QIVAGVNYFLDVELGR.T      | 2 | 5.62 | 0.64 | -7.57 |
| IPI00032293 | Cystatin-C precursor | K.QIVAGVNYFLDVELGR.T      | 3 | 6.43 | 0.46 | -8.15 |
| IPI00032293 | Cystatin-C precursor | K.TQPNLDNCPFHDPHLK.R      | 2 | 4.23 | 0.52 | -4.79 |
| IPI00032293 | Cystatin-C precursor | K.TQPNLDNCPFHDPHLK.R      | 4 | 2.73 | 0.38 | -3.64 |
| IPI00032293 | Cystatin-C precursor | L.DFAVGEYNK.A             | 1 | 2.47 | 0.32 | -4.32 |
| IPI00032293 | Cystatin-C precursor | L.VGGPM*DASVEEEGVR.R      | 2 | 3.70 | 0.38 | -2.77 |
| IPI00032293 | Cystatin-C precursor | N.YFLDVELGR.T             | 2 | 3.63 | 0.35 | -2.85 |
| IPI00032293 | Cystatin-C precursor | P.AAGSSPGKPPR.L           | 1 | 2.12 | 0.27 | -0.32 |
| IPI00032293 | Cystatin-C precursor | P.RLVGGPM*DASVEEEGVR.R    | 3 | 4.75 | 0.28 | -1.69 |
| IPI00032293 | Cystatin-C precursor | R.ALDFAVGEY.N             | 1 | 2.00 | 0.27 | -1.22 |
| IPI00032293 | Cystatin-C precursor | R.ALDFAVGEYNK.A           | 1 | 3.03 | 0.46 | -4.71 |
| IPI00032293 | Cystatin-C precursor | R.ALDFAVGEYNK.A           | 2 | 4.20 | 0.47 | -5.21 |
| IPI00032293 | Cystatin-C precursor | R.KAFCSFQIY.A             | 1 | 1.82 | 0.24 | -3.27 |
| IPI00032293 | Cystatin-C precursor | R.KAFCSFQIYAVPWQGTMTLSK.S | 2 | 5.49 | 0.51 | -4.80 |
| IPI00032293 | Cystatin-C precursor | R.KAFCSFQIYAVPWQGTMTLSK.S | 3 | 4.36 | 0.48 | -5.58 |
| IPI00032293 | Cystatin-C precursor | R.KQIVAGVNY.F             | 1 | 2.81 | 0.40 | -3.05 |
| IPI00032293 | Cystatin-C precursor | R.KQIVAGVNYFLDVELGR.T     | 2 | 6.50 | 0.65 | -8.05 |
| IPI00032293 | Cystatin-C precursor | R.KQIVAGVNYFLDVELGR.T     | 3 | 5.84 | 0.41 | -5.89 |
| IPI00032293 | Cystatin-C precursor | R.LVGGPM*DASVEEEGVR.R     | 2 | 5.57 | 0.50 | -4.98 |
| IPI00032293 | Cystatin-C precursor | R.LVGGPM*DASVEEEGVR.R     | 3 | 5.41 | 0.29 | -2.79 |
| IPI00032293 | Cystatin-C precursor | R.LVGGPM*DASVEEEGVR.R.A   | 2 | 2.63 | 0.21 | -3.55 |

|             |                                              |                                                 |   |      |      |       |
|-------------|----------------------------------------------|-------------------------------------------------|---|------|------|-------|
| IPI00032293 | Cystatin-C precursor                         | R.LVGGPMDASVEEEGV.R                             | 2 | 3.57 | 0.34 |       |
| IPI00032293 | Cystatin-C precursor                         | R.RALDFAVGEYNK.A                                | 1 | 3.42 | 0.52 | -5.06 |
| IPI00032293 | Cystatin-C precursor                         | R.RALDFAVGEYNK.A                                | 2 | 4.04 | 0.46 | -4.51 |
| IPI00032293 | Cystatin-C precursor                         | R.RALDFAVGEYNK.A                                | 3 | 3.30 | 0.28 | -4.57 |
| IPI00032293 | Cystatin-C precursor                         | S.FQIYAVPWQGTMTLSK.S                            | 2 | 4.89 | 0.47 | -3.95 |
| IPI00032293 | Cystatin-C precursor                         | S.FQIYAVPWQGTMTLSK.S                            | 3 | 3.56 | 0.33 | -3.00 |
| IPI00032293 | Cystatin-C precursor                         | S.FQIYAVPWQGTMTLSK.S                            | 2 | 3.81 | 0.35 | -3.14 |
| IPI00032293 | Cystatin-C precursor                         | S.PAAGSSPGKPPR.L                                | 2 | 3.53 | 0.43 | -1.70 |
| IPI00032293 | Cystatin-C precursor                         | V.GGPM*DAVEEEGV.R                               | 2 | 3.96 | 0.39 | -3.72 |
| IPI00032293 | Cystatin-C precursor                         | V.PWQGTMTLSK.S                                  | 1 | 2.34 | 0.26 | -5.76 |
| IPI00032293 | Cystatin-C precursor                         | V.PWQGTMTLSK.S                                  | 2 | 2.98 | 0.28 | -1.94 |
| IPI00032293 | Cystatin-C precursor                         | V.SPAAGSSPGKPPR.L                               | 2 | 4.12 | 0.40 | -2.31 |
| IPI00032293 | Cystatin-C precursor                         | Y.AVPWQGTMTLSK.S                                | 1 | 2.05 | 0.24 | -3.18 |
| IPI00032293 | Cystatin-C precursor                         | Y.AVPWQGTMTLSK.S                                | 2 | 2.98 | 0.42 | -3.20 |
| IPI00032311 | Lipopolysaccharide-binding protein precursor | K.GLQYAAQEGLLALQSELLR.I                         | 2 | 5.68 | 0.39 |       |
| IPI00032311 | Lipopolysaccharide-binding protein precursor | K.GLQYAAQEGLLALQSELLR.I                         | 3 | 4.91 | 0.42 | -5.19 |
| IPI00032311 | Lipopolysaccharide-binding protein precursor | K.SVSSDLQPYLQTLPTTEIDSFADIDYSLVEAPR.A           | 3 | 5.05 | 0.33 |       |
| IPI00032311 | Lipopolysaccharide-binding protein precursor | R.ITDKGLQYAAQEGLLALQSELLR.I                     | 2 | 4.85 | 0.46 |       |
| IPI00032311 | Lipopolysaccharide-binding protein precursor | R.ITDKGLQYAAQEGLLALQSELLR.I                     | 3 | 3.06 | 0.20 | -2.51 |
| IPI00032311 | Lipopolysaccharide-binding protein precursor | R.SPVTLAAVM*SLPEEHNK.M                          | 3 | 3.86 | 0.35 | -1.48 |
| IPI00032311 | Lipopolysaccharide-binding protein precursor | R.SPVTLAAVMSLPEEHNK.M                           | 3 | 4.73 | 0.36 |       |
| IPI00032313 | Protein S100-A4                              | R.ELPSFLGK.R                                    | 2 | 1.42 | 0.18 | -2.81 |
| IPI00032328 | Isoform HMW of Kininogen-1 precursor         | C.VHPISTQSPDLEPILR.H                            | 3 | 3.83 | 0.27 | 0.40  |
| IPI00032328 | Isoform HMW of Kininogen-1 precursor         | D.IPTNSPELEETLTHITK.L                           | 3 | 4.68 | 0.54 | -3.17 |
| IPI00032328 | Isoform HMW of Kininogen-1 precursor         | I.PTNSPELEETLTHITK.L                            | 2 | 5.22 | 0.57 | -3.52 |
| IPI00032328 | Isoform HMW of Kininogen-1 precursor         | I.PTNSPELEETLTHITK.L                            | 3 | 4.29 | 0.40 | -3.93 |
| IPI00032328 | Isoform HMW of Kininogen-1 precursor         | K.AATGECTATVGK.R                                | 2 | 3.81 | 0.46 | -4.72 |
| IPI00032328 | Isoform HMW of Kininogen-1 precursor         | K.AATGECTATVGKR.S                               | 2 | 3.43 | 0.38 | -4.18 |
| IPI00032328 | Isoform HMW of Kininogen-1 precursor         | K.AVDAALKK.Y                                    | 2 | 2.72 | 0.20 | -4.79 |
| IPI00032328 | Isoform HMW of Kininogen-1 precursor         | K.DFVQPPTK.I                                    | 1 | 1.67 | 0.06 | -2.56 |
| IPI00032328 | Isoform HMW of Kininogen-1 precursor         | K.DFVQPPTK.I                                    | 2 | 2.48 | 0.15 | -4.19 |
| IPI00032328 | Isoform HMW of Kininogen-1 precursor         | K.ENFLFLTPDCK.S                                 | 1 | 3.27 | 0.29 | -3.78 |
| IPI00032328 | Isoform HMW of Kininogen-1 precursor         | K.ENFLFLTPDCK.S                                 | 2 | 4.01 | 0.31 | -3.73 |
| IPI00032328 | Isoform HMW of Kininogen-1 precursor         | K.FSVATQTCQITPAEGPVVTAQYDCLGCVHPISTQSPDLEPILR.H | 3 | 4.34 | 0.53 | -3.40 |
| IPI00032328 | Isoform HMW of Kininogen-1 precursor         | K.FSVATQTCQITPAEGPVVTAQYDCLGCVHPISTQSPDLEPILR.H | 4 | 5.64 | 0.52 | -2.18 |
| IPI00032328 | Isoform HMW of Kininogen-1 precursor         | K.IYPTVNCQPLGM*ISLM*K.R                         | 2 | 5.10 | 0.49 | -3.81 |
| IPI00032328 | Isoform HMW of Kininogen-1 precursor         | K.IYPTVNCQPLGM*ISLM*K.R                         | 3 | 3.71 | 0.45 | -6.75 |
| IPI00032328 | Isoform HMW of Kininogen-1 precursor         | K.IYPTVNCQPLGMISLM*K.R                          | 2 | 5.46 | 0.17 |       |
| IPI00032328 | Isoform HMW of Kininogen-1 precursor         | K.IYPTVNCQPLGMISLMK.R                           | 2 | 3.48 | 0.29 |       |
| IPI00032328 | Isoform HMW of Kininogen-1 precursor         | K.KIYPTVNCQPLGM*ISLM*.K                         | 2 | 4.17 | 0.47 | -2.21 |
| IPI00032328 | Isoform HMW of Kininogen-1 precursor         | K.KIYPTVNCQPLGM*ISLM*K.R                        | 2 | 3.85 | 0.42 | -4.40 |
| IPI00032328 | Isoform HMW of Kininogen-1 precursor         | K.KIYPTVNCQPLGM*ISLM*K.R                        | 3 | 4.31 | 0.31 | -5.44 |

|             |                                                         |                                 |   |      |      |       |
|-------------|---------------------------------------------------------|---------------------------------|---|------|------|-------|
| IPI00032328 | Isoform HMW of Kininogen-1 precursor                    | K.KLGQSLDCNAEYVVPWEK.K          | 2 | 4.84 | 0.35 |       |
| IPI00032328 | Isoform HMW of Kininogen-1 precursor                    | K.KLGQSLDCNAEYVVPWEKK.I         | 3 | 4.40 | 0.28 |       |
| IPI00032328 | Isoform HMW of Kininogen-1 precursor                    | K.KYFIDFVAR.E                   | 1 | 2.82 | 0.27 | -3.27 |
| IPI00032328 | Isoform HMW of Kininogen-1 precursor                    | K.KYFIDFVAR.E                   | 2 | 3.13 | 0.35 | -3.25 |
| IPI00032328 | Isoform HMW of Kininogen-1 precursor                    | K.KYNSQNSNNQFVLYR.I             | 2 | 5.50 | 0.47 | -4.39 |
| IPI00032328 | Isoform HMW of Kininogen-1 precursor                    | K.KYNSQNSNNQFVLYR.I             | 3 | 4.59 | 0.43 | -2.89 |
| IPI00032328 | Isoform HMW of Kininogen-1 precursor                    | K.LDDDLEHQGGHVLDHGHK.H          | 3 | 2.68 | 0.16 | -3.43 |
| IPI00032328 | Isoform HMW of Kininogen-1 precursor                    | K.LDDDLEHQGGHVLDHGHKHKHGHGHGK.H | 7 | 2.22 | 0.10 | -3.65 |
| IPI00032328 | Isoform HMW of Kininogen-1 precursor                    | K.LGQSLDCNAEYVVPWEK.K           | 2 | 5.04 | 0.47 | -5.49 |
| IPI00032328 | Isoform HMW of Kininogen-1 precursor                    | K.LGQSLDCNAEYVVPWEKK.I          | 3 | 4.20 | 0.37 | -1.56 |
| IPI00032328 | Isoform HMW of Kininogen-1 precursor                    | K.RPPGFSPFR.S                   | 1 | 1.59 | 0.30 | -5.39 |
| IPI00032328 | Isoform HMW of Kininogen-1 precursor                    | K.RPPGFSPFR.S                   | 2 | 2.67 | 0.22 | -3.42 |
| IPI00032328 | Isoform HMW of Kininogen-1 precursor                    | K.SLWNGDTGECTDNAYIDIQLR.I       | 2 | 5.24 | 0.56 | -4.45 |
| IPI00032328 | Isoform HMW of Kininogen-1 precursor                    | K.SLWNGDTGECTDNAYIDIQLR.I       | 3 | 3.79 | 0.06 |       |
| IPI00032328 | Isoform HMW of Kininogen-1 precursor                    | K.TVGSDFYFSFK.Y                 | 1 | 2.61 | 0.30 | -1.83 |
| IPI00032328 | Isoform HMW of Kininogen-1 precursor                    | K.TVGSDFYFSFK.Y                 | 2 | 3.86 | 0.46 | -1.80 |
| IPI00032328 | Isoform HMW of Kininogen-1 precursor                    | K.TVGSDFYFSFKYEIK.E             | 2 | 4.11 | 0.39 | -4.98 |
| IPI00032328 | Isoform HMW of Kininogen-1 precursor                    | K.TWQDCEYK.D                    | 2 | 2.03 | 0.11 | -2.56 |
| IPI00032328 | Isoform HMW of Kininogen-1 precursor                    | K.TWQDCEYKDAK.A                 | 2 | 3.78 | 0.23 |       |
| IPI00032328 | Isoform HMW of Kininogen-1 precursor                    | K.YEIKEGDCPVQSGK.T              | 2 | 4.78 | 0.36 |       |
| IPI00032328 | Isoform HMW of Kininogen-1 precursor                    | K.YFIDFVAR.E                    | 1 | 2.65 | 0.33 | -4.15 |
| IPI00032328 | Isoform HMW of Kininogen-1 precursor                    | K.YFIDFVAR.E                    | 2 | 3.44 | 0.35 | -3.76 |
| IPI00032328 | Isoform HMW of Kininogen-1 precursor                    | K.YNSQNSNNQFVLYR.I              | 2 | 4.61 | 0.38 | -3.21 |
| IPI00032328 | Isoform HMW of Kininogen-1 precursor                    | K.YNSQNSNNQFVLYR.I              | 3 | 5.37 | 0.47 | -3.89 |
| IPI00032328 | Isoform HMW of Kininogen-1 precursor                    | R.DIPTNSPELEETLTHITK.L          | 2 | 4.59 | 0.51 | -4.42 |
| IPI00032328 | Isoform HMW of Kininogen-1 precursor                    | R.IASFSQNCDIYPGKDFVQPPTK.I      | 2 | 4.15 | 0.55 | -2.76 |
| IPI00032328 | Isoform HMW of Kininogen-1 precursor                    | R.IASFSQNCDIYPGKDFVQPPTK.I      | 3 | 4.84 | 0.54 | -4.44 |
| IPI00032328 | Isoform HMW of Kininogen-1 precursor                    | R.IASFSQNCDIYPGKDFVQPPTK.I      | 4 | 3.08 | 0.17 | -3.36 |
| IPI00032328 | Isoform HMW of Kininogen-1 precursor                    | R.KHNLGHGKHERD                  | 3 | 1.96 | 0.16 | -1.52 |
| IPI00032328 | Isoform HMW of Kininogen-1 precursor                    | R.KHNLGHGKHERDQGHGHR.G          | 3 | 2.84 | 0.32 | -4.15 |
| IPI00032328 | Isoform HMW of Kininogen-1 precursor                    | R.KHNLGHGKHERDQGHGHR.G          | 4 | 2.87 | 0.40 | -3.92 |
| IPI00032328 | Isoform HMW of Kininogen-1 precursor                    | R.KHNLGHGKHERDQGHGHR.G          | 5 | 2.32 | 0.33 | -2.83 |
| IPI00032328 | Isoform HMW of Kininogen-1 precursor                    | R.QVVAGLNFR.I                   | 1 | 1.97 | 0.18 | -1.97 |
| IPI00032328 | Isoform HMW of Kininogen-1 precursor                    | R.QVVAGLNFR.I                   | 2 | 2.47 | 0.33 | -3.28 |
| IPI00032328 | Isoform HMW of Kininogen-1 precursor                    | R.QVVAGK.K                      | 1 | 2.43 | 0.10 | -3.23 |
| IPI00032338 | kelch-like 20                                           | R.AM*FTGELAESRQTEVVIR.D         | 2 | 1.96 | 0.12 | -4.05 |
| IPI00032405 | Endothelin B receptor-like protein 2 precursor          | R.VSGGAPLHLGR.H                 | 1 | 2.20 | 0.11 | -2.23 |
| IPI00032405 | Endothelin B receptor-like protein 2 precursor          | R.VSGGAPLHLGR.H                 | 2 | 3.92 | 0.42 | -2.16 |
| IPI00032416 | Isoform Long of Protein jagged-2 precursor              | R.DLPDSSLIQGAHAIVAAITQR.G       | 3 | 2.35 | 0.08 | -3.65 |
| IPI00032425 | Receptor activity-modifying protein 3 precursor         | K.AFADM*M*GK.V                  | 2 | 2.35 | 0.18 | -3.04 |
| IPI00032532 | Isoform 2 of Growth arrest-specific protein 6 precursor | K.YGSPYTK.N                     | 1 | 1.65 | 0.23 | -3.03 |



|             |                                                                         |                               |   |      |      |       |
|-------------|-------------------------------------------------------------------------|-------------------------------|---|------|------|-------|
| IPI00032532 | Isoform 2 of Growth arrest-specific protein 6 precursor                 | R.AVPLSVALVDYHSTK.K           | 2 | 4.50 | 0.50 | -2.71 |
| IPI00032532 | Isoform 2 of Growth arrest-specific protein 6 precursor                 | R.CEQVCVNSPGSYTCHCDGR.G       | 3 | 3.73 | 0.26 |       |
| IPI00032532 | Isoform 2 of Growth arrest-specific protein 6 precursor                 | R.DGEATLEVDGTR.G              | 2 | 2.31 | 0.26 | -2.04 |
| IPI00032532 | Isoform 2 of Growth arrest-specific protein 6 precursor                 | R.DVDECLQGR.C                 | 2 | 2.81 | 0.32 | -4.21 |
| IPI00032532 | Isoform 2 of Growth arrest-specific protein 6 precursor                 | R.GQSEVSAAQLQER.L             | 2 | 4.11 | 0.34 | -2.46 |
| IPI00032532 | Isoform 2 of Growth arrest-specific protein 6 precursor                 | R.GSFYPGSGFAFYSLDYM*R.T       | 2 | 4.42 | 0.57 | -3.20 |
| IPI00032532 | Isoform 2 of Growth arrest-specific protein 6 precursor                 | R.LLDLDEAAYK.H                | 2 | 3.06 | 0.24 | -1.72 |
| IPI00032532 | Isoform 2 of Growth arrest-specific protein 6 precursor                 | R.M*QCFSVTER.G                | 2 | 2.13 | 0.08 | -3.74 |
| IPI00032532 | Isoform 2 of Growth arrest-specific protein 6 precursor                 | R.SPVLTFAGGLPDVPVTSAPVTAFYR.G | 2 | 5.73 | 0.61 | -5.27 |
| IPI00032532 | Isoform 2 of Growth arrest-specific protein 6 precursor                 | R.SPVLTFAGGLPDVPVTSAPVTAFYR.G | 3 | 4.41 | 0.41 | -4.69 |
| IPI00032532 | Isoform 2 of Growth arrest-specific protein 6 precursor                 | R.YLDCINK.Y                   | 2 | 1.94 | 0.08 | -1.58 |
| IPI00032597 | RNA-binding motif protein, X-linked 2                                   | K.SRTAYSGGAEDLERELKKEKPK.H    | 3 | 2.90 | 0.11 |       |
| IPI00032826 | Hsc70-interacting protein                                               | K.AIDLFTDAIK.L                | 2 | 2.46 | 0.27 | -2.99 |
| IPI00032830 | Isoform 1 of Oligoribonuclease, mitochondrial precursor (Fragment)      | R.ALDDISESIKELQFYR.N          | 3 | 3.36 | 0.29 | -1.68 |
| IPI00032904 | Beta-synuclein                                                          | K.AKEGVVAAAEEK.T              | 2 | 2.05 | 0.05 | 2.33  |
| IPI00033030 | Protein ADRM1                                                           | R.SQSAAVTPSSTTSSTR.A          | 2 | 3.31 | 0.38 | -2.03 |
| IPI00033419 | Protein Fem-1 homolog b                                                 | R.STPLIIAARNGHAK.V            | 2 | 2.63 | 0.06 |       |
| IPI00033466 | C-type lectin domain family 11 member A precursor                       | R.DAVQALQEAQGR.A              | 2 | 2.82 | 0.26 | -3.81 |
| IPI00033466 | C-type lectin domain family 11 member A precursor                       | R.DFEAQAAAQAR.C               | 2 | 3.84 | 0.24 |       |
| IPI00033560 | Isoform Alpha of Receptor-type tyrosine-protein phosphatase R precursor | K.NSIELFVSPINRK.T             | 2 | 3.37 | 0.19 | -3.79 |
| IPI00033560 | Isoform Alpha of Receptor-type tyrosine-protein phosphatase R precursor | K.SGKPVFIYK.H                 | 1 | 1.95 | 0.18 | -4.12 |
| IPI00033560 | Isoform Alpha of Receptor-type tyrosine-protein phosphatase R precursor | K.SGKPVFIYK.H                 | 2 | 2.21 | 0.11 | 1.52  |
| IPI00033560 | Isoform Alpha of Receptor-type tyrosine-protein phosphatase R precursor | K.TGISDALPSEEVL.R.S           | 2 | 4.06 | 0.30 | -1.58 |

|             |                                                                                                                   |                                         |   |      |      |       |
|-------------|-------------------------------------------------------------------------------------------------------------------|-----------------------------------------|---|------|------|-------|
| IPI00033560 | Isoform Alpha of Receptor-type tyrosine-protein phosphatase R precursor                                           | R.QGVAAALGLLPQQVHINR.L                  | 2 | 4.01 | 0.50 | -4.42 |
| IPI00033560 | Isoform Alpha of Receptor-type tyrosine-protein phosphatase R precursor                                           | R.QGVAAALGLLPQQVHINR.L                  | 3 | 3.84 | 0.37 | -4.11 |
| IPI00033600 | Isoform 1 of Protein phosphatase 1 regulatory subunit 7                                                           | R.AIENIDTLTNLESFLGK.N                   | 2 | 5.38 | 0.52 | -5.35 |
| IPI00034006 | Tyrosine-protein phosphatase non-receptor type 23                                                                 | R.M*PMIWLDLK.E                          | 2 | 2.68 | 0.07 |       |
| IPI00034319 | Isoform A of Protein CutA precursor                                                                               | K.GKIEEDSEVLM*M*IK.T                    | 2 | 4.88 | 0.46 | -3.22 |
| IPI00034319 | Isoform A of Protein CutA precursor                                                                               | K.GKIEEDSEVLM*M*IK.T                    | 3 | 3.37 | 0.23 | -2.58 |
| IPI00034319 | Isoform A of Protein CutA precursor                                                                               | K.TQSSLVPALTDVFR.S                      | 1 | 1.48 | 0.27 | -3.75 |
| IPI00034319 | Isoform A of Protein CutA precursor                                                                               | K.TQSSLVPALTDVFR.S                      | 2 | 4.24 | 0.46 | -3.86 |
| IPI00034319 | Isoform A of Protein CutA precursor                                                                               | K.TQSSLVPALTDVFR.S                      | 3 | 2.87 | 0.15 | -2.47 |
| IPI00034319 | Isoform A of Protein CutA precursor                                                                               | R.LAACVNLIPIQITSIYEWK.G                 | 2 | 5.35 | 0.53 | -4.12 |
| IPI00034319 | Isoform A of Protein CutA precursor                                                                               | R.LAACVNLIPIQITSIYEWK.G                 | 3 | 5.21 | 0.43 | -3.56 |
| IPI00034319 | Isoform A of Protein CutA precursor                                                                               | R.SVHPYEVAEVIALPVEQGNFPYLQWVR.Q         | 3 | 6.20 | 0.49 | -3.83 |
| IPI00034319 | Isoform A of Protein CutA precursor                                                                               | Y.EVAEVIALPVEQGNFPYLQWVR.Q              | 2 | 3.73 | 0.38 | -2.75 |
| IPI00038378 | Isoform 1 of Enolase-phosphatase E1                                                                               | K.LLFGHSTEGDILELVDGHFDTK.I              | 3 | 3.89 | 0.18 | -1.30 |
| IPI00040730 | protocadherin 21 precursor                                                                                        | K.IDITDAETLSR.S                         | 2 | 3.98 | 0.24 | -2.90 |
| IPI00040900 | Isoform 2 of Heparan sulfate 2-O-sulfotransferase 1                                                               | R.HEVREIEQRHTM*DGPRQDATLDEEEDM*VIIYNR.V | 5 | 3.06 | 0.06 | 1.82  |
| IPI00043201 | Centromere protein J                                                                                              | R.IEEFKKEEM*RKLQK.E                     | 2 | 2.23 | 0.21 |       |
| IPI00043215 | immunoglobulin superfamily, member 1 isoform 1                                                                    | K.EGAQEPLQQRPSGYR.A                     | 2 | 1.74 | 0.08 | -1.68 |
| IPI00043215 | immunoglobulin superfamily, member 1 isoform 1                                                                    | K.EGAQEPLQQRPSGYR.A                     | 3 | 2.01 | 0.13 | -1.46 |
| IPI00043215 | immunoglobulin superfamily, member 1 isoform 1                                                                    | K.EGEQEPVQQLGAVGR.E                     | 2 | 3.99 | 0.40 | -2.67 |
| IPI00043215 | immunoglobulin superfamily, member 1 isoform 1                                                                    | K.TWASPVVTPGAR.V                        | 2 | 2.79 | 0.16 | -1.33 |
| IPI00043215 | immunoglobulin superfamily, member 1 isoform 1                                                                    | K.WSEPSEPLELVIK.E                       | 2 | 3.58 | 0.34 | -3.47 |
| IPI00043215 | immunoglobulin superfamily, member 1 isoform 1                                                                    | R.FALLQEGAHVPLQFR.S                     | 2 | 3.70 | 0.38 | -1.73 |
| IPI00043215 | immunoglobulin superfamily, member 1 isoform 1                                                                    | R.FALLQEGAHVPLQFR.S                     | 3 | 3.35 | 0.26 | -1.97 |
| IPI00043731 | CDNA FLJ30671 fis, clone FCBBF1000687, moderately similar to Mus musculus Rap2 interacting protein 8 (RPIP8) mRNA | R.VACRKVSQNCICSINMENVSSRAKGR.A          | 3 | 2.37 | 0.06 | -0.19 |
| IPI00043756 | Isoform 3 of Zinc transporter ZIP12                                                                               | K.GLSLISKEDFK.Q                         | 2 | 2.44 | 0.25 | -3.30 |
| IPI00043756 | Isoform 3 of Zinc transporter ZIP12                                                                               | K.QM*SPGIIQQLLSCSCHLPK.D                | 3 | 3.22 | 0.29 | -4.45 |
| IPI00043756 | Isoform 3 of Zinc transporter ZIP12                                                                               | K.SPEDSQAEM*PIGSM*TASNR.K               | 2 | 4.66 | 0.57 | -1.45 |
| IPI00043756 | Isoform 3 of Zinc transporter ZIP12                                                                               | K.SPEDSQAEM*PIGSM*TASNR.K               | 3 | 2.40 | 0.14 | -2.89 |
| IPI00043756 | Isoform 3 of Zinc transporter ZIP12                                                                               | K.SPEDSQAEM*PIGSM*TASNR.C               | 3 | 3.57 | 0.41 | -4.56 |
| IPI00043756 | Isoform 3 of Zinc transporter ZIP12                                                                               | R.LSELDQLLNTLWTR.S                      | 2 | 4.65 | 0.35 | -4.63 |
| IPI00043756 | Isoform 3 of Zinc transporter ZIP12                                                                               | R.QLVEIFLQK.G                           | 2 | 2.65 | 0.15 | -2.23 |
| IPI00043756 | Isoform 3 of Zinc transporter ZIP12                                                                               | R.QYFDTSQSQCM*ETK.T                     | 2 | 4.23 | 0.50 | -4.64 |
| IPI00043756 | Isoform 3 of Zinc transporter ZIP12                                                                               | Y.FDTSQSQCM*ETK.T                       | 2 | 4.04 | 0.46 | -3.61 |
| IPI00043810 | Isoform 1 of Proline-rich transmembrane protein 1                                                                 | R.LGAGGLASSAATAQR.G                     | 2 | 4.64 | 0.44 | -2.02 |

|             |                                                           |                                 |   |      |      |       |
|-------------|-----------------------------------------------------------|---------------------------------|---|------|------|-------|
| IPI00043810 | Isoform 1 of Proline-rich transmembrane protein 1         | R.M*PPDPYLQETR.F                | 2 | 2.76 | 0.29 | -3.91 |
| IPI00043978 | Isoform 1 of Partitioning-defective 3 homolog B           | R.SSDPVPGPPADTQPSASHPGGQSLK.L   | 3 | 2.67 | 0.06 | 1.09  |
| IPI00044326 | Carbohydrate sulfotransferase 14                          | R.AGDADLQVR.Q                   | 2 | 3.24 | 0.12 | -2.68 |
| IPI00044369 | Isoform 1 of Plexin domain-containing protein 2 precursor | K.EIPVLVTQISSTNHPVK.V           | 2 | 4.49 | 0.47 | -1.40 |
| IPI00044369 | Isoform 1 of Plexin domain-containing protein 2 precursor | K.EIPVLVTQISSTNHPVK.V           | 3 | 1.84 | 0.28 | -3.55 |
| IPI00044369 | Isoform 1 of Plexin domain-containing protein 2 precursor | K.VGLSDAFVVVHR.I                | 2 | 3.61 | 0.46 | -3.43 |
| IPI00044369 | Isoform 1 of Plexin domain-containing protein 2 precursor | K.VGLSDAFVVVHR.I                | 3 | 4.64 | 0.49 | -3.11 |
| IPI00044369 | Isoform 1 of Plexin domain-containing protein 2 precursor | R.ASVGQDSPEPR.S                 | 2 | 3.32 | 0.34 | -2.79 |
| IPI00044369 | Isoform 1 of Plexin domain-containing protein 2 precursor | R.IIFGYKEIPVLVTQISSTNHPVK.V     | 3 | 4.59 | 0.46 | -3.81 |
| IPI00044369 | Isoform 1 of Plexin domain-containing protein 2 precursor | R.IYGPSDSASR.D                  | 1 | 1.42 | 0.08 | -3.74 |
| IPI00044369 | Isoform 1 of Plexin domain-containing protein 2 precursor | R.IYGPSDSASR.D                  | 2 | 3.10 | 0.23 | -4.22 |
| IPI00044369 | Isoform 1 of Plexin domain-containing protein 2 precursor | R.M*LTATQYIAPLM*ANFDPSVSR.N     | 2 | 4.68 | 0.48 | -4.34 |
| IPI00044369 | Isoform 1 of Plexin domain-containing protein 2 precursor | R.TIYEYHRVELQM*SK.I             | 2 | 3.01 | 0.28 | -3.13 |
| IPI00044369 | Isoform 1 of Plexin domain-containing protein 2 precursor | R.VELQM*SK.I                    | 2 | 2.31 | 0.06 | -3.44 |
| IPI00044600 | VPS10 domain-containing receptor SorCS2 precursor         | K.MLTAPFAGPIDHGSLTVQDDYIFFK.A   | 3 | 3.13 | 0.13 |       |
| IPI00044600 | VPS10 domain-containing receptor SorCS2 precursor         | R.LGPHAQLTR.V                   | 1 | 2.43 | 0.09 | -4.50 |
| IPI00044600 | VPS10 domain-containing receptor SorCS2 precursor         | R.LGPHAQLTR.V                   | 2 | 2.72 | 0.23 | -2.66 |
| IPI00044607 | Protein phosphatase inhibitor 2-like protein 1            | K.KSQKWDEM*NILATYRPADKDYGLMK.I  | 3 | 3.38 | 0.11 |       |
| IPI00044707 | Hyaluronan and proteoglycan link protein 4 precursor      | K.VVDPLAFTDVFVALGPQHR.A         | 2 | 5.21 | 0.59 | -3.10 |
| IPI00044707 | Hyaluronan and proteoglycan link protein 4 precursor      | K.VVDPLAFTDVFVALGPQHR.A         | 3 | 3.34 | 0.46 | -4.19 |
| IPI00044707 | Hyaluronan and proteoglycan link protein 4 precursor      | R.AELQGDGPGDASLVL.R.N           | 2 | 4.03 | 0.40 | -2.86 |
| IPI00044743 | Isoform 1 of Transmembrane protein 132B                   | K.FSSLPAYLPTNLHISNAEESFFLK.E    | 3 | 2.77 | 0.07 | -7.87 |
| IPI00044743 | Isoform 1 of Transmembrane protein 132B                   | K.IAQLQDGR.T                    | 2 | 2.68 | 0.17 | -0.94 |
| IPI00044743 | Isoform 1 of Transmembrane protein 132B                   | R.IKAAAGVK.I                    | 1 | 1.79 | 0.14 |       |
| IPI00044743 | Isoform 1 of Transmembrane protein 132B                   | R.TLAGREPGITTVQVLSPLSDSILA.EK.T | 3 | 4.71 | 0.37 | -3.18 |

|             |                                                                            |                                         |   |      |      |       |
|-------------|----------------------------------------------------------------------------|-----------------------------------------|---|------|------|-------|
| IPI00044743 | Isoform 1 of Transmembrane protein 132B                                    | R.VEPFFIYR.A                            | 2 | 1.80 | 0.22 | -1.99 |
| IPI00044751 | Isoform 1 of M-phase phosphoprotein 1                                      | K.EIVKASSKKSHQIEELEQQIEK.L              | 3 | 2.94 | 0.18 |       |
| IPI00044842 | Isoform 2 of RAB3A-interacting protein                                     | K.ASAVECGGPK.K                          | 2 | 2.04 | 0.13 | 1.44  |
| IPI00045219 | Sorting nexin-18                                                           | R.APEPGPAGDGGPGAPAR.Y                   | 2 | 2.50 | 0.22 | -4.27 |
| IPI00045360 | Capicua-like protein/double homeodomain 4 fusion protein                   | K.VRPPPLKK.T                            | 2 | 1.84 | 0.16 |       |
| IPI00045511 | Isoform 1 of Chloride channel CLIC-like protein 1 precursor                | K.IDECEKK.K                             | 2 | 1.67 | 0.06 | -1.04 |
| IPI00045536 | Isoform 3 of Chitinase domain-containing protein 1 precursor               | K.FTQISPVWLQLK.R                        | 2 | 3.96 | 0.33 | -3.05 |
| IPI00045536 | Isoform 3 of Chitinase domain-containing protein 1 precursor               | K.SQFSDKPVQDR.G                         | 2 | 3.08 | 0.34 | -3.69 |
| IPI00045839 | Isoform 3 of Prolyl 3-hydroxylase 1 precursor                              | R.SPYNYLQVAYFKINK.L                     | 2 | 2.95 | 0.08 |       |
| IPI00045841 | Isoform 1 of Low-density lipoprotein receptor-related protein 11 precursor | K.AGQDVVHLPTDGVVLDGR.E                  | 2 | 4.54 | 0.53 | -2.62 |
| IPI00045841 | Isoform 1 of Low-density lipoprotein receptor-related protein 11 precursor | K.AGQDVVHLPTDGVVLDGR.E                  | 3 | 5.08 | 0.45 | -2.06 |
| IPI00045841 | Isoform 1 of Low-density lipoprotein receptor-related protein 11 precursor | K.FALHSGYSSYSLSR.A                      | 2 | 3.68 | 0.44 | -2.94 |
| IPI00045841 | Isoform 1 of Low-density lipoprotein receptor-related protein 11 precursor | K.FALHSGYSSYSLSR.A                      | 3 | 4.02 | 0.14 | -1.49 |
| IPI00045841 | Isoform 1 of Low-density lipoprotein receptor-related protein 11 precursor | R.AAYSTGGCLHTCSR.Y                      | 2 | 2.52 | 0.30 |       |
| IPI00045841 | Isoform 1 of Low-density lipoprotein receptor-related protein 11 precursor | R.APDGAALATAR.A                         | 2 | 3.20 | 0.28 | -2.43 |
| IPI00045841 | Isoform 1 of Low-density lipoprotein receptor-related protein 11 precursor | R.CSVAVVELPR.R                          | 2 | 2.78 | 0.31 | -1.52 |
| IPI00045841 | Isoform 1 of Low-density lipoprotein receptor-related protein 11 precursor | R.TKDSLAAAGASFLR.A                      | 2 | 3.18 | 0.31 | -3.68 |
| IPI00045841 | Isoform 1 of Low-density lipoprotein receptor-related protein 11 precursor | R.TTGPSDAGGDSLVEK.S                     | 2 | 4.31 | 0.37 | -2.31 |
| IPI00045928 | Sodium/hydrogen exchanger 7                                                | K.SLSCTQEDRAFSTLLVNVSGKFFEYTLKGEISPGK.I | 3 | 3.57 | 0.07 |       |
| IPI00045939 | 2-aminoethanethiol dioxygenase                                             | R.DCHYRVLEPVRPKEASSSACDLPR.E            | 4 | 2.30 | 0.13 | 0.68  |
| IPI00046057 | Isoform 2 of Syntaxin-binding protein 1                                    | R.VKEVLLDEDDLWIALR.H                    | 2 | 5.66 | 0.51 | -2.73 |
| IPI00056314 | Pre-rRNA-processing protein TSR2 homolog                                   | R.EM*ASCITQR.K                          | 2 | 2.28 | 0.25 | -2.58 |
| IPI00056357 | Uncharacterized protein C19orf10 precursor                                 | K.SYLYFTQFK.A                           | 1 | 2.41 | 0.32 | -3.42 |
| IPI00056357 | Uncharacterized protein C19orf10 precursor                                 | K.SYLYFTQFK.A                           | 2 | 2.99 | 0.36 | -3.24 |
| IPI00056357 | Uncharacterized protein C19orf10 precursor                                 | K.TAVAHRPGAFK.A                         | 2 | 3.24 | 0.31 | -2.88 |
| IPI00056357 | Uncharacterized protein C19orf10 precursor                                 | K.TAVAHRPGAFKAELSK.L                    | 3 | 2.18 | 0.11 | -3.50 |
| IPI00056357 | Uncharacterized protein C19orf10 precursor                                 | R.ESDVPLKTEEFVTK.T                      | 2 | 3.92 | 0.50 | -4.40 |
| IPI00056357 | Uncharacterized protein C19orf10 precursor                                 | R.GAEIEYAM*AYSK.A                       | 2 | 4.16 | 0.45 | -2.59 |

|             |                                                            |                         |   |      |      |       |
|-------------|------------------------------------------------------------|-------------------------|---|------|------|-------|
| IPI00056478 | Isoform 1 of Immunoglobulin superfamily member 8 precursor | A.REVLVPEGPLYR.V        | 2 | 3.79 | 0.38 | -3.62 |
| IPI00056478 | Isoform 1 of Immunoglobulin superfamily member 8 precursor | K.DTQFSYAVFK.S          | 1 | 2.84 | 0.35 | -4.47 |
| IPI00056478 | Isoform 1 of Immunoglobulin superfamily member 8 precursor | K.DTQFSYAVFK.S          | 2 | 3.82 | 0.36 | -3.21 |
| IPI00056478 | Isoform 1 of Immunoglobulin superfamily member 8 precursor | K.SRVVAGEVQVQR.L        | 2 | 4.09 | 0.39 | -3.26 |
| IPI00056478 | Isoform 1 of Immunoglobulin superfamily member 8 precursor | K.SRVVAGEVQVQR.L        | 3 | 3.54 | 0.10 | -2.43 |
| IPI00056478 | Isoform 1 of Immunoglobulin superfamily member 8 precursor | R.LEAAPRGDAGTYR.C       | 2 | 2.41 | 0.19 | -1.13 |
| IPI00056478 | Isoform 1 of Immunoglobulin superfamily member 8 precursor | R.LQAQDAGIYECHTPSTDTR.Y | 2 | 4.41 | 0.46 | -2.86 |
| IPI00056478 | Isoform 1 of Immunoglobulin superfamily member 8 precursor | R.LQAQDAGIYECHTPSTDTR.Y | 3 | 2.75 | 0.28 | -2.44 |
| IPI00056478 | Isoform 1 of Immunoglobulin superfamily member 8 precursor | R.LQGDVVLK.I            | 1 | 1.92 | 0.20 | -3.56 |
| IPI00056478 | Isoform 1 of Immunoglobulin superfamily member 8 precursor | R.LRLEAAPRGDAGTYR.C     | 2 | 2.33 | 0.22 | -2.62 |
| IPI00056478 | Isoform 1 of Immunoglobulin superfamily member 8 precursor | R.LRLEAAPRGDAGTYR.C     | 3 | 2.43 | 0.05 | -2.90 |
| IPI00056478 | Isoform 1 of Immunoglobulin superfamily member 8 precursor | R.M*TVHEGQELALGCLAR.T   | 2 | 4.30 | 0.47 | -2.78 |
| IPI00056478 | Isoform 1 of Immunoglobulin superfamily member 8 precursor | R.M*TVHEGQELALGCLAR.T   | 3 | 2.91 | 0.28 | -1.13 |
| IPI00056478 | Isoform 1 of Immunoglobulin superfamily member 8 precursor | R.SDLAVEAGAPYAER.L      | 2 | 4.28 | 0.48 | -3.02 |
| IPI00056478 | Isoform 1 of Immunoglobulin superfamily member 8 precursor | R.STLQEVVGIR.S          | 1 | 2.05 | 0.20 | -2.97 |
| IPI00056478 | Isoform 1 of Immunoglobulin superfamily member 8 precursor | R.STLQEVVGIR.S          | 2 | 3.76 | 0.30 | -2.93 |
| IPI00056478 | Isoform 1 of Immunoglobulin superfamily member 8 precursor | R.VLPDVLQVSAAPPGPR.G    | 2 | 2.04 | 0.33 | -2.84 |
| IPI00056478 | Isoform 1 of Immunoglobulin superfamily member 8 precursor | R.VLPDVLQVSAAPPGPR.G    | 3 | 3.70 | 0.24 | -2.30 |
| IPI00056478 | Isoform 1 of Immunoglobulin superfamily member 8 precursor | R.VVAGEVQVQR.L          | 2 | 3.78 | 0.28 | -3.62 |
| IPI00056478 | Isoform 1 of Immunoglobulin superfamily member 8 precursor | R.YLGSYSYGK.V           | 1 | 1.86 | 0.31 | -1.93 |
| IPI00056478 | Isoform 1 of Immunoglobulin superfamily member 8 precursor | R.YLGSYSYGKVELR.V       | 2 | 2.85 | 0.29 | -3.33 |

|             |                                                                                |                                                     |   |      |      |       |
|-------------|--------------------------------------------------------------------------------|-----------------------------------------------------|---|------|------|-------|
| IPI00056478 | Isoform 1 of Immunoglobulin superfamily member 8 precursor                     | W.FLYRPEAPDTALGIVSTK.D                              | 3 | 3.88 | 0.33 | -1.92 |
| IPI00059164 | Galactose-3-O-sulfotransferase 3                                               | R.ARPEPVLNPPRRPIR.V                                 | 3 | 2.85 | 0.21 | -3.36 |
| IPI00059395 | Kinesin-like protein KIFC2                                                     | R.SPPTRARPPAPLARRSPRRISGR.Q                         | 3 | 3.45 | 0.17 |       |
| IPI00060146 | Isoform 1 of Smith-Magenis syndrome chromosome region candidate gene 7 protein | K.RFIDRATSPRDEDDTKADSWK.E                           | 2 | 2.13 | 0.09 | 2.47  |
| IPI00060265 | Zinc finger protein 775                                                        | R.FSQKPNLTRHLR.N                                    | 2 | 2.09 | 0.19 |       |
| IPI00060308 | Isoform 6 of PDZ and LIM domain protein 7                                      | R.ILAHLTGTEFM*QDPDEEHLKKSREK.Y                      | 3 | 2.34 | 0.05 | -4.65 |
| IPI00060310 | Phospholipase D4                                                               | K.FWVVDGR.H                                         | 1 | 1.86 | 0.12 | -2.18 |
| IPI00060310 | Phospholipase D4                                                               | K.TFQTYWVLGVPK.A                                    | 2 | 4.13 | 0.38 | -3.68 |
| IPI00060310 | Phospholipase D4                                                               | R.FQPFHGLFDGVPPTTAYFSASPPALCPQGR.T                  | 3 | 3.79 | 0.31 |       |
| IPI00060310 | Phospholipase D4                                                               | R.LLVGCGLNTDPTM*FPYLR.S                             | 2 | 4.37 | 0.42 | -4.81 |
| IPI00060310 | Phospholipase D4                                                               | R.LLVGCGLNTDPTM*FPYLR.S                             | 3 | 3.10 | 0.31 | -4.46 |
| IPI00060310 | Phospholipase D4                                                               | R.TSTDQLVLAAR.G                                     | 2 | 3.95 | 0.33 | -3.15 |
| IPI00060310 | Phospholipase D4                                                               | R.YWPVLDNALR.A                                      | 2 | 2.08 | 0.13 | -4.17 |
| IPI00060546 | Uncharacterized protein C10orf35                                               | R.LGAAQSPFNLDNR.Q                                   | 2 | 3.94 | 0.35 | -3.26 |
| IPI00060715 | BTB/POZ domain-containing protein KCTD12                                       | R.DLQLVLPDYFPER.S                                   | 2 | 3.21 | 0.34 | -5.31 |
| IPI00060715 | BTB/POZ domain-containing protein KCTD12                                       | R.LGAPQQPGPGPPSR.R                                  | 2 | 3.15 | 0.41 | -3.95 |
| IPI00060715 | BTB/POZ domain-containing protein KCTD12                                       | R.RLGAPQQPGPGPPSR.R                                 | 3 | 3.49 | 0.21 | -2.22 |
| IPI00060715 | BTB/POZ domain-containing protein KCTD12                                       | R.SGYITIGYR.G                                       | 2 | 2.05 | 0.17 | -1.55 |
| IPI00060715 | BTB/POZ domain-containing protein KCTD12                                       | R.SPSGGAAGPLLTSPQSLDGSRR.S                          | 3 | 3.46 | 0.34 | -2.47 |
| IPI00060715 | BTB/POZ domain-containing protein KCTD12                                       | R.YILDYLR.D                                         | 2 | 2.27 | 0.14 | -1.81 |
| IPI00061354 | Isoform 2 of Bromodomain adjacent to zinc finger domain protein 2B             | R.KLQAQEIAR.Q                                       | 1 | 2.23 | 0.05 |       |
| IPI00061354 | Isoform 2 of Bromodomain adjacent to zinc finger domain protein 2B             | R.QAAQIKLLRKLQKQEQARVAKEAKKQQAIM*AAEEK.R            | 3 | 3.71 | 0.18 |       |
| IPI00061448 | 13 kDa protein                                                                 | R.TIAVLLDDILQR.L                                    | 2 | 4.50 | 0.35 | -4.05 |
| IPI00061507 | Isoform 3 of Ester hydrolase C11orf54                                          | R.IAEVGGVPYLLPLVNQK.K                               | 2 | 2.56 | 0.28 | -3.28 |
| IPI00061520 | hypothetical protein LOC84752                                                  | R.GAGSGGADEVGEGAR.T                                 | 2 | 3.46 | 0.36 | -2.55 |
| IPI00061520 | hypothetical protein LOC84752                                                  | R.VFLLGVPR.G                                        | 2 | 2.50 | 0.13 | -0.67 |
| IPI00061977 | IGHA1 protein                                                                  | K.GTTVTVSSASPTSPK.V                                 | 1 | 2.33 | 0.24 |       |
| IPI00061977 | IGHA1 protein                                                                  | K.SAVQGPPDR.D                                       | 2 | 2.59 | 0.20 |       |
| IPI00061977 | IGHA1 protein                                                                  | K.SAVQGPPDRDLGCGYSVSSVLSGCAEPWNHGK.T                | 3 | 5.00 | 0.30 |       |
| IPI00061977 | IGHA1 protein                                                                  | K.SGNTFRPEVHLLPPPSEELALNELVTLTCLAR.G                | 2 | 4.32 | 0.41 |       |
| IPI00061977 | IGHA1 protein                                                                  | K.SGNTFRPEVHLLPPPSEELALNELVTLTCLAR.G                | 3 | 6.86 | 0.60 |       |
| IPI00061977 | IGHA1 protein                                                                  | K.TFTCTAAYPESK.T                                    | 1 | 2.27 | 0.26 |       |
| IPI00061977 | IGHA1 protein                                                                  | K.TFTCTAAYPESK.T                                    | 2 | 4.10 | 0.40 |       |
| IPI00061977 | IGHA1 protein                                                                  | K.TFTCTAAYPESKTPLTATLSK.S                           | 2 | 4.13 | 0.39 |       |
| IPI00061977 | IGHA1 protein                                                                  | K.TFTCTAAYPESKTPLTATLSK.S                           | 3 | 4.01 | 0.44 |       |
| IPI00061977 | IGHA1 protein                                                                  | K.TPLTATLSK.S                                       | 1 | 2.18 | 0.20 |       |
| IPI00061977 | IGHA1 protein                                                                  | K.TPLTATLSK.S                                       | 2 | 2.50 | 0.14 |       |
| IPI00061977 | IGHA1 protein                                                                  | K.VFPLSLCSTQPDGNVVIACLVLQGGFFPQEPLSVTWSESGQGV.TAR.N | 3 | 3.85 | 0.24 |       |

|             |                                                             |                                    |   |      |      |       |
|-------------|-------------------------------------------------------------|------------------------------------|---|------|------|-------|
| IPI00061977 | IGHA1 protein                                               | K.YLTWASR.Q                        | 1 | 1.98 | 0.18 |       |
| IPI00061977 | IGHA1 protein                                               | K.YLTWASR.Q                        | 2 | 1.93 | 0.24 |       |
| IPI00061977 | IGHA1 protein                                               | Q.EPSQGTTFVAVTSILR.V               | 2 | 3.82 | 0.43 | -5.84 |
| IPI00061977 | IGHA1 protein                                               | R.DASGVFTWTPSSGK.S                 | 1 | 3.53 | 0.45 |       |
| IPI00061977 | IGHA1 protein                                               | R.DASGVFTWTPSSGK.S                 | 2 | 5.30 | 0.49 |       |
| IPI00061977 | IGHA1 protein                                               | R.EKYLTWASR.Q                      | 1 | 2.49 | 0.27 |       |
| IPI00061977 | IGHA1 protein                                               | R.GFSPKDVLR.W                      | 2 | 2.81 | 0.13 |       |
| IPI00061977 | IGHA1 protein                                               | R.NFPPSQDASGDLYTTSSQLTLPATQCLAGK.S | 2 | 4.34 | 0.48 |       |
| IPI00061977 | IGHA1 protein                                               | R.NFPPSQDASGDLYTTSSQLTLPATQCLAGK.S | 3 | 5.77 | 0.57 |       |
| IPI00061977 | IGHA1 protein                                               | R.QEPSQGTTFVAVTSILR.V              | 2 | 4.27 | 0.52 |       |
| IPI00061977 | IGHA1 protein                                               | R.QEPSQGTTFVAVTSILR.V              | 3 | 4.05 | 0.27 |       |
| IPI00061977 | IGHA1 protein                                               | R.SDDTAVYYCAR.R                    | 2 | 3.57 | 0.35 |       |
| IPI00061977 | IGHA1 protein                                               | R.SLRSDDTAVYYCAR.R                 | 2 | 4.54 | 0.26 |       |
| IPI00061977 | IGHA1 protein                                               | R.VAAEDWK.K                        | 2 | 2.23 | 0.16 |       |
| IPI00061977 | IGHA1 protein                                               | R.WLQGSQELPR.E                     | 1 | 3.00 | 0.19 |       |
| IPI00061977 | IGHA1 protein                                               | R.WLQGSQELPR.E                     | 2 | 3.80 | 0.33 |       |
| IPI00061977 | IGHA1 protein                                               | R.WLQGSQELPREK.Y                   | 2 | 2.71 | 0.15 |       |
| IPI00062037 | Dynein light chain 2, cytoplasmic                           | K.YNIEKDIAAYIK.K                   | 2 | 4.01 | 0.37 | -3.32 |
| IPI00062037 | Dynein light chain 2, cytoplasmic                           | K.YNIEKDIAAYIK.K                   | 3 | 3.44 | 0.28 | -2.04 |
| IPI00062037 | Dynein light chain 2, cytoplasmic                           | K.YNIEKDIAAYIKK.E                  | 2 | 4.14 | 0.33 | -3.18 |
| IPI00062037 | Dynein light chain 2, cytoplasmic                           | K.YNIEKDIAAYIKK.E                  | 3 | 3.85 | 0.34 | -2.24 |
| IPI00062037 | Dynein light chain 2, cytoplasmic                           | R.NFGSYVTHETK.H                    | 2 | 2.51 | 0.18 | -2.18 |
| IPI00062730 | Uncharacterized protein C16orf45                            | -.M*ELKQSLSTHLEAEKPLR.R            | 2 | 2.67 | 0.10 |       |
| IPI00063048 | Isoform 2 of Beta-galactoside alpha-2,6-sialyltransferase 2 | K.EFFSSQVGR.K                      | 1 | 2.89 | 0.26 | -2.35 |
| IPI00063048 | Isoform 2 of Beta-galactoside alpha-2,6-sialyltransferase 2 | K.EFFSSQVGR.K                      | 2 | 2.11 | 0.11 | -2.19 |
| IPI00063048 | Isoform 2 of Beta-galactoside alpha-2,6-sialyltransferase 2 | R.AHPAGSFHAGPGDLQK.W               | 2 | 4.38 | 0.57 | -4.76 |
| IPI00063048 | Isoform 2 of Beta-galactoside alpha-2,6-sialyltransferase 2 | R.AHPAGSFHAGPGDLQK.W               | 3 | 2.24 | 0.17 | -2.03 |
| IPI00063048 | Isoform 2 of Beta-galactoside alpha-2,6-sialyltransferase 2 | R.EGAFPAAQVQR.R                    | 1 | 2.53 | 0.27 | -3.54 |
| IPI00063048 | Isoform 2 of Beta-galactoside alpha-2,6-sialyltransferase 2 | R.EGAFPAAQVQR.R                    | 2 | 3.43 | 0.28 | -3.65 |
| IPI00063048 | Isoform 2 of Beta-galactoside alpha-2,6-sialyltransferase 2 | R.LLPVQGK.Q                        | 1 | 1.65 | 0.11 | -1.90 |
| IPI00063048 | Isoform 2 of Beta-galactoside alpha-2,6-sialyltransferase 2 | R.RLLPVQGK.Q                       | 2 | 2.55 | 0.19 | -5.02 |
| IPI00063827 | Isoform 1 of Abhydrolase domain-containing protein 14B      | K.TPALIVYGDQDPM*GQTSFEHLK.Q        | 3 | 3.29 | 0.42 | -1.54 |
| IPI00064241 | Isoform 1 of Zinc finger protein Eos                        | -.MHTPPALPRRFQGGGR.V               | 2 | 2.23 | 0.06 | -6.19 |

|             |                                                                         |                                 |   |      |      |       |
|-------------|-------------------------------------------------------------------------|---------------------------------|---|------|------|-------|
| IPI00064296 | PRO0633                                                                 | R.DIM*LYLQRAINTAM*YHIMM*FQLVK.D | 3 | 2.61 | 0.11 | -0.92 |
| IPI00064377 | Tumor necrosis factor receptor superfamily member 19L precursor         | R.GVEVAAGASSGGETR.Q             | 2 | 3.89 | 0.46 | -3.10 |
| IPI00064377 | Tumor necrosis factor receptor superfamily member 19L precursor         | R.RLEAQVGM*ATR.D                | 3 | 3.27 | 0.21 | 0.14  |
| IPI00064607 | Isoform 1 of Multiple epidermal growth factor-like domains 10 precursor | K.CELPCQDGTYGLNCAER.C           | 2 | 5.20 | 0.49 | -4.18 |
| IPI00064607 | Isoform 1 of Multiple epidermal growth factor-like domains 10 precursor | K.CTPGWTGLYCTQR.C               | 2 | 3.84 | 0.51 | -2.78 |
| IPI00064607 | Isoform 1 of Multiple epidermal growth factor-like domains 10 precursor | K.CYHVSGACLCEAGFAGER.C          | 3 | 2.49 | 0.12 | -3.38 |
| IPI00064607 | Isoform 1 of Multiple epidermal growth factor-like domains 10 precursor | K.NDAVCSPVDGSCTCK.A             | 2 | 3.90 | 0.53 | -4.20 |
| IPI00064607 | Isoform 1 of Multiple epidermal growth factor-like domains 10 precursor | K.NGASCSPDDGICECAPGFR.G         | 2 | 5.48 | 0.63 | -4.65 |
| IPI00064607 | Isoform 1 of Multiple epidermal growth factor-like domains 10 precursor | K.NGASCSPDDGICECAPGFR.G         | 3 | 4.64 | 0.51 | -3.90 |
| IPI00064607 | Isoform 1 of Multiple epidermal growth factor-like domains 10 precursor | R.CDQAGVIIVGNLNLSR.T            | 2 | 5.32 | 0.49 | -3.64 |
| IPI00064607 | Isoform 1 of Multiple epidermal growth factor-like domains 10 precursor | R.CPPGYTGAFCEDLCPPGK.H          | 2 | 4.55 | 0.57 | -3.08 |
| IPI00064607 | Isoform 1 of Multiple epidermal growth factor-like domains 10 precursor | R.CQDECPVGTYGVLCAETCQCQVNGGK.C  | 3 | 7.55 | 0.59 | -3.21 |
| IPI00064607 | Isoform 1 of Multiple epidermal growth factor-like domains 10 precursor | R.LCPEGLYGIK.C                  | 1 | 1.69 | 0.11 | -1.72 |
| IPI00064607 | Isoform 1 of Multiple epidermal growth factor-like domains 10 precursor | R.LCPEGLYGIK.C                  | 2 | 1.58 | 0.11 | -2.82 |
| IPI00064652 | vascular endothelial growth factor A isoform e precursor                | K.FM*DVYQR.S                    | 2 | 1.79 | 0.12 | -1.57 |
| IPI00064652 | vascular endothelial growth factor A isoform e precursor                | R.GAEESGPPHSPSR.R               | 2 | 2.06 | 0.19 |       |
| IPI00064667 | Beta-Ala-His dipeptidase precursor                                      | I.PLGAVDDGEHSQNEK.I             | 2 | 4.78 | 0.61 | -3.30 |
| IPI00064667 | Beta-Ala-His dipeptidase precursor                                      | I.PPVILAELGSDPTK.G              | 1 | 3.51 | 0.37 | -1.03 |
| IPI00064667 | Beta-Ala-His dipeptidase precursor                                      | I.PPVILAELGSDPTK.G              | 2 | 4.27 | 0.45 | -2.47 |
| IPI00064667 | Beta-Ala-His dipeptidase precursor                                      | K.AIHLDLEEYR.N                  | 1 | 2.84 | 0.32 | -3.63 |
| IPI00064667 | Beta-Ala-His dipeptidase precursor                                      | K.AIHLDLEEYR.N                  | 2 | 2.92 | 0.39 | -3.42 |
| IPI00064667 | Beta-Ala-His dipeptidase precursor                                      | K.AIHLDLEEYR.N                  | 3 | 2.87 | 0.11 | -3.83 |
| IPI00064667 | Beta-Ala-His dipeptidase precursor                                      | K.EEILM*HLWR.Y                  | 2 | 2.39 | 0.20 | -2.58 |
| IPI00064667 | Beta-Ala-His dipeptidase precursor                                      | K.EWVAIESDSVQPVP.R.F            | 1 | 1.25 | 0.21 | -2.88 |
| IPI00064667 | Beta-Ala-His dipeptidase precursor                                      | K.EWVAIESDSVQPVP.R.F            | 2 | 5.69 | 0.52 | -5.76 |
| IPI00064667 | Beta-Ala-His dipeptidase precursor                                      | K.EWVAIESDSVQPVP.R.F            | 3 | 4.38 | 0.27 | -2.51 |
| IPI00064667 | Beta-Ala-His dipeptidase precursor                                      | K.FIIEGM*EEAGSVALEELVEK.E       | 2 | 4.51 | 0.22 | -3.80 |



|             |                                    |                                      |   |      |      |       |
|-------------|------------------------------------|--------------------------------------|---|------|------|-------|
| IPI00064667 | Beta-Ala-His dipeptidase precursor | K.FIIEGM*EEAGSVALEELVEK.E            | 3 | 4.44 | 0.27 | -5.24 |
| IPI00064667 | Beta-Ala-His dipeptidase precursor | K.FIIEGM*EEAGSVALEELVEKEK.D          | 3 | 2.85 | 0.14 | -2.18 |
| IPI00064667 | Beta-Ala-His dipeptidase precursor | K.FIIEGM*EEAGSVALEELVEKEKDR.F        | 3 | 3.26 | 0.21 | -4.04 |
| IPI00064667 | Beta-Ala-His dipeptidase precursor | K.FIIEGM*EEAGSVALEELVEKEKDR.F        | 4 | 3.64 | 0.37 | -5.26 |
| IPI00064667 | Beta-Ala-His dipeptidase precursor | K.FLFDTKEEILM*HLWR.Y                 | 3 | 3.06 | 0.27 | -3.07 |
| IPI00064667 | Beta-Ala-His dipeptidase precursor | K.GPVLAWINAVSAFR.A                   | 2 | 5.16 | 0.52 | -5.14 |
| IPI00064667 | Beta-Ala-His dipeptidase precursor | K.GPVLAWINAVSAFR.A                   | 3 | 3.74 | 0.33 | -2.81 |
| IPI00064667 | Beta-Ala-His dipeptidase precursor | K.GTVCFYGHLDVQPADR.G                 | 3 | 3.48 | 0.29 | -1.99 |
| IPI00064667 | Beta-Ala-His dipeptidase precursor | K.GTVCFYGHLDVQPADRGDGLTDPYVLTEVDGK.L | 3 | 5.12 | 0.41 | -4.07 |
| IPI00064667 | Beta-Ala-His dipeptidase precursor | K.GTVCFYGHLDVQPADRGDGLTDPYVLTEVDGK.L | 4 | 5.59 | 0.50 | -5.61 |
| IPI00064667 | Beta-Ala-His dipeptidase precursor | K.LFAAFFLEM*AQLH.-                   | 2 | 5.26 | 0.60 | -7.97 |
| IPI00064667 | Beta-Ala-His dipeptidase precursor | K.LFAAFFLEM*AQLH.-                   | 3 | 5.24 | 0.49 | -4.84 |
| IPI00064667 | Beta-Ala-His dipeptidase precursor | K.LFAAFFLEMAQLH.-                    | 2 | 4.88 | 0.52 | -3.75 |
| IPI00064667 | Beta-Ala-His dipeptidase precursor | K.LFAAFFLEMAQLH.-                    | 3 | 4.41 | 0.34 | -1.95 |
| IPI00064667 | Beta-Ala-His dipeptidase precursor | K.M*FQEIVHK.S                        | 1 | 2.26 | 0.22 | -5.37 |
| IPI00064667 | Beta-Ala-His dipeptidase precursor | K.M*FQEIVHK.S                        | 2 | 2.88 | 0.28 | -4.26 |
| IPI00064667 | Beta-Ala-His dipeptidase precursor | K.M*VVSM*TLGLHPWIANIDDTQYLAAK.R      | 2 | 3.33 | 0.42 | -1.35 |
| IPI00064667 | Beta-Ala-His dipeptidase precursor | K.M*VVSM*TLGLHPWIANIDDTQYLAAK.R      | 3 | 5.98 | 0.57 | -5.94 |
| IPI00064667 | Beta-Ala-His dipeptidase precursor | K.M*VVSM*TLGLHPWIANIDDTQYLAAKR.A     | 4 | 3.78 | 0.28 | -2.89 |
| IPI00064667 | Beta-Ala-His dipeptidase precursor | K.M*VVSMTLGLHPWIANIDDTQYLAAK.R       | 3 | 5.47 | 0.19 | -2.50 |
| IPI00064667 | Beta-Ala-His dipeptidase precursor | K.SVVLIPLGAVDDGEHSQNEK.I             | 2 | 5.89 | 0.61 | -5.63 |
| IPI00064667 | Beta-Ala-His dipeptidase precursor | K.SVVLIPLGAVDDGEHSQNEK.I             | 3 | 2.43 | 0.18 | -2.85 |
| IPI00064667 | Beta-Ala-His dipeptidase precursor | K.SVVLIPLGAVDDGEHSQNEKINR.W          | 2 | 4.18 | 0.59 | -4.14 |
| IPI00064667 | Beta-Ala-His dipeptidase precursor | K.SVVLIPLGAVDDGEHSQNEKINR.W          | 3 | 2.55 | 0.26 | -2.22 |
| IPI00064667 | Beta-Ala-His dipeptidase precursor | K.SVVLIPLGAVDDGEHSQNEKINR.W          | 4 | 2.57 | 0.29 | -2.68 |
| IPI00064667 | Beta-Ala-His dipeptidase precursor | K.VFQYIDLHQDEFVQTLK.E                | 2 | 6.52 | 0.56 | -5.93 |
| IPI00064667 | Beta-Ala-His dipeptidase precursor | K.VFQYIDLHQDEFVQTLK.E                | 3 | 5.55 | 0.51 | -4.75 |
| IPI00064667 | Beta-Ala-His dipeptidase precursor | K.VFQYIDLHQDEFVQTLKEWVAIESDSVQPVPR.F | 3 | 6.72 | 0.64 | -3.27 |
| IPI00064667 | Beta-Ala-His dipeptidase precursor | K.VFQYIDLHQDEFVQTLKEWVAIESDSVQPVPR.F | 4 | 4.45 | 0.39 | -3.48 |
| IPI00064667 | Beta-Ala-His dipeptidase precursor | L.IPLGAVDDGEHSQNEK.I                 | 2 | 5.03 | 0.52 | -2.81 |
| IPI00064667 | Beta-Ala-His dipeptidase precursor | L.TDPYVLTEVDGK.L                     | 2 | 3.37 | 0.41 | -0.63 |
| IPI00064667 | Beta-Ala-His dipeptidase precursor | M.GPQQLPDGQSLPIPPVILAELGSDPTK.G      | 3 | 3.65 | 0.35 | -3.56 |
| IPI00064667 | Beta-Ala-His dipeptidase precursor | P.SLSIHGIEGAFDEPGTK.T                | 2 | 4.14 | 0.44 | -2.56 |
| IPI00064667 | Beta-Ala-His dipeptidase precursor | P.SLSIHGIEGAFDEPGTK.T                | 3 | 4.55 | 0.33 | -2.51 |
| IPI00064667 | Beta-Ala-His dipeptidase precursor | P.SPPPALLEK.V                        | 1 | 2.76 | 0.11 | -2.61 |
| IPI00064667 | Beta-Ala-His dipeptidase precursor | Q.YIDLHQDEFVQTLK.E                   | 2 | 4.96 | 0.43 | -2.72 |
| IPI00064667 | Beta-Ala-His dipeptidase precursor | R.ALEQDLPVNIK.F                      | 1 | 3.09 | 0.27 | -4.33 |
| IPI00064667 | Beta-Ala-His dipeptidase precursor | R.ALEQDLPVNIK.F                      | 2 | 3.96 | 0.29 | -3.30 |
| IPI00064667 | Beta-Ala-His dipeptidase precursor | R.DGSTIPIAK.M                        | 1 | 1.97 | 0.22 | -3.24 |
| IPI00064667 | Beta-Ala-His dipeptidase precursor | R.DGSTIPIAK.M                        | 2 | 2.84 | 0.25 | -4.01 |
| IPI00064667 | Beta-Ala-His dipeptidase precursor | R.GATDNKGPVLAWINAVSAFR.A             | 2 | 5.09 | 0.58 | -6.27 |
| IPI00064667 | Beta-Ala-His dipeptidase precursor | R.GATDNKGPVLAWINAVSAFR.A             | 3 | 5.25 | 0.51 | -5.12 |

|             |                                                                                    |                                             |   |      |      |       |
|-------------|------------------------------------------------------------------------------------|---------------------------------------------|---|------|------|-------|
| IPI00064667 | Beta-Ala-His dipeptidase precursor                                                 | R.GDGWLTPYPVLTEVDGK.L                       | 2 | 3.47 | 0.18 | -5.11 |
| IPI00064667 | Beta-Ala-His dipeptidase precursor                                                 | R.GNSYFM*VEVK.C                             | 1 | 2.32 | 0.21 | -2.22 |
| IPI00064667 | Beta-Ala-His dipeptidase precursor                                                 | R.GNSYFM*VEVK.C                             | 2 | 3.83 | 0.50 | -4.07 |
| IPI00064667 | Beta-Ala-His dipeptidase precursor                                                 | R.GNSYFMVEVK.C                              | 2 | 3.63 | 0.34 | -1.25 |
| IPI00064667 | Beta-Ala-His dipeptidase precursor                                                 | R.HLEDVFSK.R                                | 1 | 2.35 | 0.20 | -2.28 |
| IPI00064667 | Beta-Ala-His dipeptidase precursor                                                 | R.HLEDVFSK.R                                | 2 | 3.38 | 0.27 | -2.92 |
| IPI00064667 | Beta-Ala-His dipeptidase precursor                                                 | R.HLEDVFSKR.N                               | 1 | 2.73 | 0.39 | -5.51 |
| IPI00064667 | Beta-Ala-His dipeptidase precursor                                                 | R.HLEDVFSKR.N                               | 2 | 3.10 | 0.29 | -1.94 |
| IPI00064667 | Beta-Ala-His dipeptidase precursor                                                 | R.KPAITYGTR.G                               | 1 | 2.57 | 0.26 | -5.22 |
| IPI00064667 | Beta-Ala-His dipeptidase precursor                                                 | R.KPAITYGTR.G                               | 2 | 2.54 | 0.29 | -2.96 |
| IPI00064667 | Beta-Ala-His dipeptidase precursor                                                 | R.M*M*AVAADTLQR.L                           | 1 | 1.08 | 0.17 | -3.11 |
| IPI00064667 | Beta-Ala-His dipeptidase precursor                                                 | R.M*M*AVAADTLQR.L                           | 2 | 3.98 | 0.47 | -3.72 |
| IPI00064667 | Beta-Ala-His dipeptidase precursor                                                 | R.TVFGTEPDM*IR.D                            | 2 | 3.05 | 0.30 | -3.70 |
| IPI00064667 | Beta-Ala-His dipeptidase precursor                                                 | R.TVFGTEPDM*IRDGSTIPIAK.M                   | 2 | 3.39 | 0.49 | -4.10 |
| IPI00064667 | Beta-Ala-His dipeptidase precursor                                                 | R.TVFGTEPDM*IRDGSTIPIAK.M                   | 3 | 2.51 | 0.37 | -4.16 |
| IPI00064667 | Beta-Ala-His dipeptidase precursor                                                 | R.VASVDM*GPQQLPDGQSLPIPPVILAEFGSDPTK.G      | 3 | 5.24 | 0.44 | -6.13 |
| IPI00064667 | Beta-Ala-His dipeptidase precursor                                                 | R.WNYIEGTK.L                                | 1 | 2.25 | 0.21 | -2.65 |
| IPI00064667 | Beta-Ala-His dipeptidase precursor                                                 | R.WNYIEGTK.L                                | 2 | 2.43 | 0.21 | -1.87 |
| IPI00064667 | Beta-Ala-His dipeptidase precursor                                                 | R.YPSLSIHGIEGAFDEPGTK.T                     | 2 | 5.74 | 0.57 | -3.76 |
| IPI00064667 | Beta-Ala-His dipeptidase precursor                                                 | R.YPSLSIHGIEGAFDEPGTK.T                     | 3 | 6.05 | 0.53 | -4.31 |
| IPI00064667 | Beta-Ala-His dipeptidase precursor                                                 | R.YPSLSIHGIEGAFDEPGTKTVIPGR.V               | 4 | 3.65 | 0.34 | -3.86 |
| IPI00064667 | Beta-Ala-His dipeptidase precursor                                                 | S.SPSPPPALLEK.V                             | 1 | 2.44 | 0.31 | -3.71 |
| IPI00064667 | Beta-Ala-His dipeptidase precursor                                                 | V.AIESDSVQPVPR.F                            | 2 | 2.95 | 0.17 | -3.05 |
| IPI00064667 | Beta-Ala-His dipeptidase precursor                                                 | V.FGTEPDM*IRDGSTIPIAK.M                     | 2 | 2.97 | 0.25 | -2.46 |
| IPI00064667 | Beta-Ala-His dipeptidase precursor                                                 | V.FQYIDLHQDEFVQTLK.E                        | 2 | 5.44 | 0.54 | -2.54 |
| IPI00064667 | Beta-Ala-His dipeptidase precursor                                                 | V.LIPLGAVDDGEHSQNEK.I                       | 2 | 4.52 | 0.50 | -3.40 |
| IPI00064667 | Beta-Ala-His dipeptidase precursor                                                 | V.VLIPLGAVDDGEHSQNEK.I                      | 2 | 3.16 | 0.41 | -2.72 |
| IPI00064667 | Beta-Ala-His dipeptidase precursor                                                 | W.IANIDDTQYLAAK.R                           | 2 | 4.22 | 0.44 | -3.73 |
| IPI00064667 | Beta-Ala-His dipeptidase precursor                                                 | W.LTDPYPVLTEVDGK.L                          | 2 | 4.27 | 0.49 | -4.25 |
| IPI00064667 | Beta-Ala-His dipeptidase precursor                                                 | W.NYIEGTK.L                                 | 1 | 2.08 | 0.18 | -4.41 |
| IPI00064667 | Beta-Ala-His dipeptidase precursor                                                 | W.VAIESDSVQPVPR.F                           | 2 | 3.65 | 0.38 | -3.22 |
| IPI00064667 | Beta-Ala-His dipeptidase precursor                                                 | Y.PLSLSIHGIEGAFDEPGTK.T                     | 2 | 4.25 | 0.45 | -2.29 |
| IPI00064667 | Beta-Ala-His dipeptidase precursor                                                 | Y.PLSLSIHGIEGAFDEPGTK.T                     | 3 | 5.35 | 0.45 | -1.90 |
| IPI00064935 | Alpha-protein kinase 3                                                             | K.VRAAGDGEATTPEERESPTVSPRGPRKSLVPGSPGTPGR.E | 3 | 3.82 | 0.12 |       |
| IPI00065276 | Isoform 2 of Tether containing UBX domain for GLUT4                                | K.TVLDHTQTLFQPQLGDR.V                       | 4 | 2.90 | 0.19 | -7.48 |
| IPI00065312 | N-acetyl-beta-glucosaminyl-glycoprotein 4-beta-N-acetylgalactosaminyltransferase 1 | R.DLDM*LFPGGAGR.L                           | 2 | 3.46 | 0.34 | -4.41 |
| IPI00065312 | N-acetyl-beta-glucosaminyl-glycoprotein 4-beta-N-acetylgalactosaminyltransferase 1 | R.DTFFLTPR.M                                | 2 | 2.38 | 0.32 | -1.56 |
| IPI00065931 | Isoform 2 of A-kinase anchor protein 13                                            | K.SGQM*FAKEDLKRKLVLDGVSFLK.N                | 3 | 3.91 | 0.15 |       |
| IPI00069058 | VGF nerve growth factor inducible precursor                                        | A.APPGRPEAQPPLSSEHKPEVAGDAVPGPK.D           | 2 | 3.86 | 0.56 | -3.46 |

|             |                                             |                                                |   |      |      |       |
|-------------|---------------------------------------------|------------------------------------------------|---|------|------|-------|
| IPI00069058 | VGf nerve growth factor inducible precursor | A.APPGRPEAQPPPLSSEHKEPVAGDAVPGPK.D             | 3 | 5.74 | 0.55 | -4.83 |
| IPI00069058 | VGf nerve growth factor inducible precursor | A.APPGRPEAQPPPLSSEHKEPVAGDAVPGPKDGSAPFVR.G     | 4 | 5.62 | 0.48 | -4.09 |
| IPI00069058 | VGf nerve growth factor inducible precursor | A.AVLLQALDRPASPPAPSGSQGPEEEAAEALLTETVR.S       | 3 | 6.61 | 0.57 | -2.86 |
| IPI00069058 | VGf nerve growth factor inducible precursor | A.DLASDLLLLQYLLQGGAR.Q                         | 2 | 5.03 | 0.40 | -3.41 |
| IPI00069058 | VGf nerve growth factor inducible precursor | A.DLASDLLLLQYLLQGGAR.Q                         | 3 | 5.23 | 0.33 | -1.30 |
| IPI00069058 | VGf nerve growth factor inducible precursor | A.LAAVLLQALDRPASPPAPSGSQGPEEEAAEALLTETVR.S     | 4 | 4.75 | 0.41 | -4.82 |
| IPI00069058 | VGf nerve growth factor inducible precursor | A.LDRPASPPAPSGSQGPEEEAAEALLTETVR.S             | 3 | 6.57 | 0.52 | -4.81 |
| IPI00069058 | VGf nerve growth factor inducible precursor | A.PPGRPEAQPPPLSSEHKEPVAGDAVPGPK.D              | 3 | 6.01 | 0.49 | -4.55 |
| IPI00069058 | VGf nerve growth factor inducible precursor | A.PPGRPEAQPPPLSSEHKEPVAGDAVPGPK.D              | 4 | 4.94 | 0.40 | -4.26 |
| IPI00069058 | VGf nerve growth factor inducible precursor | A.PPGRPEAQPPPLSSEHKEPVAGDAVPGPKDGSAPFVR.G      | 4 | 5.00 | 0.43 | -4.26 |
| IPI00069058 | VGf nerve growth factor inducible precursor | A.SDLLLLQYLLQGGAR.Q                            | 2 | 4.18 | 0.35 | -3.86 |
| IPI00069058 | VGf nerve growth factor inducible precursor | A.VLLQALDRPASPPAPSGSQGPEEEAAEALLTETVR.S        | 4 | 4.93 | 0.37 | -4.31 |
| IPI00069058 | VGf nerve growth factor inducible precursor | D.PSEEEALASLLQELR.D                            | 2 | 4.82 | 0.29 | -4.73 |
| IPI00069058 | VGf nerve growth factor inducible precursor | D.PSEEEALASLLQELR.D                            | 3 | 4.35 | 0.13 | -2.64 |
| IPI00069058 | VGf nerve growth factor inducible precursor | G.RPEAQPPPLSSEHKEPVAGDAVPGPK.D                 | 3 | 5.38 | 0.49 | -3.83 |
| IPI00069058 | VGf nerve growth factor inducible precursor | G.RPEAQPPPLSSEHKEPVAGDAVPGPK.D                 | 4 | 6.17 | 0.57 | -4.29 |
| IPI00069058 | VGf nerve growth factor inducible precursor | H.SLPAPESPEPAAPPRPQTPENGPEASDPSEEEALASLLQELR.D | 3 | 4.87 | 0.57 | -4.68 |
| IPI00069058 | VGf nerve growth factor inducible precursor | H.SLPAPESPEPAAPPRPQTPENGPEASDPSEEEALASLLQELR.D | 4 | 4.84 | 0.38 | -2.95 |
| IPI00069058 | VGf nerve growth factor inducible precursor | K.ARRPESALLGGSEAGER.L                          | 2 | 3.02 | 0.21 | -4.02 |
| IPI00069058 | VGf nerve growth factor inducible precursor | K.AYQGVAAFPFK.A                                | 1 | 2.71 | 0.37 | -2.95 |
| IPI00069058 | VGf nerve growth factor inducible precursor | K.AYQGVAAFPFK.A                                | 2 | 3.94 | 0.38 | -2.88 |
| IPI00069058 | VGf nerve growth factor inducible precursor | K.AYQGVAAFPFK.A.R                              | 1 | 2.62 | 0.34 | -1.51 |
| IPI00069058 | VGf nerve growth factor inducible precursor | K.AYQGVAAFPFK.A.R                              | 2 | 4.51 | 0.44 | -1.69 |
| IPI00069058 | VGf nerve growth factor inducible precursor | K.DGSAPFVR.G                                   | 1 | 1.55 | 0.19 | -2.72 |
| IPI00069058 | VGf nerve growth factor inducible precursor | K.DGSAPFVR.G                                   | 2 | 2.38 | 0.22 | -3.92 |
| IPI00069058 | VGf nerve growth factor inducible precursor | K.FGEGVSSPK.T                                  | 1 | 1.94 | 0.11 | -3.61 |
| IPI00069058 | VGf nerve growth factor inducible precursor | K.FGEGVSSPK.T                                  | 2 | 3.60 | 0.25 | -3.25 |
| IPI00069058 | VGf nerve growth factor inducible precursor | K.KNAPPEPVPPR.A                                | 2 | 2.65 | 0.40 | -1.10 |
| IPI00069058 | VGf nerve growth factor inducible precursor | K.LHLPADDVVS.I                                 | 1 | 1.85 | 0.28 | -1.93 |
| IPI00069058 | VGf nerve growth factor inducible precursor | K.LHLPADDVVSIIIEV.E                            | 2 | 3.09 | 0.26 | -5.65 |
| IPI00069058 | VGf nerve growth factor inducible precursor | K.LHLPADDVVSIIIEV.E                            | 2 | 3.80 | 0.34 | -5.08 |
| IPI00069058 | VGf nerve growth factor inducible precursor | K.LHLPADDVVSIIIEVEE.K                          | 2 | 4.79 | 0.44 | -8.31 |
| IPI00069058 | VGf nerve growth factor inducible precursor | K.LHLPADDVVSIIIEVEE.K                          | 3 | 3.67 | 0.31 | -1.97 |
| IPI00069058 | VGf nerve growth factor inducible precursor | K.LHLPADDVVSIIIEVEEK.R                         | 3 | 3.95 | 0.31 | -4.91 |
| IPI00069058 | VGf nerve growth factor inducible precursor | K.NAPPEPVPPR.A                                 | 1 | 2.34 | 0.28 | -3.43 |
| IPI00069058 | VGf nerve growth factor inducible precursor | K.NAPPEPVPPR.A                                 | 2 | 2.05 | 0.20 | -3.21 |
| IPI00069058 | VGf nerve growth factor inducible precursor | K.RQETAAAETETR.T                               | 2 | 3.93 | 0.33 | -2.09 |
| IPI00069058 | VGf nerve growth factor inducible precursor | K.THLGEALAPLSK.A                               | 1 | 3.32 | 0.34 | -3.16 |
| IPI00069058 | VGf nerve growth factor inducible precursor | K.THLGEALAPLSK.A                               | 2 | 3.55 | 0.48 | -2.99 |
| IPI00069058 | VGf nerve growth factor inducible precursor | K.THLGEALAPLSK.A                               | 3 | 3.56 | 0.08 | -4.04 |
| IPI00069058 | VGf nerve growth factor inducible precursor | K.THLGEALAPLSK.A.Y                             | 2 | 3.28 | 0.43 | -3.50 |
| IPI00069058 | VGf nerve growth factor inducible precursor | L.ADLASDLLLLQYLLQGGAR.Q                        | 3 | 5.32 | 0.37 | -4.14 |

|             |                                             |                                                |   |      |      |       |
|-------------|---------------------------------------------|------------------------------------------------|---|------|------|-------|
| IPI00069058 | VGf nerve growth factor inducible precursor | L.ASDLLLQYLLQGGAR.Q                            | 2 | 4.86 | 0.34 | -3.64 |
| IPI00069058 | VGf nerve growth factor inducible precursor | L.DRPASPPAPSGSQQGPEEEAAEALLTETVR.S             | 3 | 5.88 | 0.49 | -4.28 |
| IPI00069058 | VGf nerve growth factor inducible precursor | L.LQALDRPASPPAPSGSQQGPEEEAAEALLTETVR.S         | 3 | 5.38 | 0.55 | -4.09 |
| IPI00069058 | VGf nerve growth factor inducible precursor | L.SKAYQGVAAPFPK.A                              | 2 | 4.07 | 0.39 | -3.01 |
| IPI00069058 | VGf nerve growth factor inducible precursor | N.GPEASDPSEELEALASLLQELR.D                     | 2 | 5.41 | 0.53 | -5.31 |
| IPI00069058 | VGf nerve growth factor inducible precursor | N.GPEASDPSEELEALASLLQELR.D                     | 3 | 4.09 | 0.30 | -5.25 |
| IPI00069058 | VGf nerve growth factor inducible precursor | N.SEPQDEGELFQGVDP.R.A                          | 2 | 4.65 | 0.35 | -5.02 |
| IPI00069058 | VGf nerve growth factor inducible precursor | N.SEPQDEGELFQGVDP.R.A                          | 3 | 3.82 | 0.35 | -3.16 |
| IPI00069058 | VGf nerve growth factor inducible precursor | P.DSGPLPETHKFGEGVSSPK.T                        | 2 | 3.82 | 0.49 | -3.92 |
| IPI00069058 | VGf nerve growth factor inducible precursor | P.EASDPSEELEALASLLQELR.D                       | 2 | 4.94 | 0.43 | -2.85 |
| IPI00069058 | VGf nerve growth factor inducible precursor | P.ERAPLPPPAPSQFQAR.M                           | 3 | 4.67 | 0.33 | -2.23 |
| IPI00069058 | VGf nerve growth factor inducible precursor | P.ETHKFGEGVSSPK.T                              | 2 | 3.16 | 0.28 | -3.92 |
| IPI00069058 | VGf nerve growth factor inducible precursor | P.GRPEAQPPPLSSEHKEPVAGDAVPGPK.D                | 2 | 4.22 | 0.51 | -3.59 |
| IPI00069058 | VGf nerve growth factor inducible precursor | P.GRPEAQPPPLSSEHKEPVAGDAVPGPK.D                | 3 | 5.49 | 0.44 | -4.07 |
| IPI00069058 | VGf nerve growth factor inducible precursor | P.GRPEAQPPPLSSEHKEPVAGDAVPGPK.D                | 4 | 6.54 | 0.53 | -3.66 |
| IPI00069058 | VGf nerve growth factor inducible precursor | P.GRPEAQPPPLSSEHKEPVAGDAVPGPKDGSAP.EVR.G       | 3 | 6.80 | 0.58 | 0.47  |
| IPI00069058 | VGf nerve growth factor inducible precursor | P.GRPEAQPPPLSSEHKEPVAGDAVPGPKDGSAP.EVR.G       | 4 | 5.08 | 0.51 | -2.47 |
| IPI00069058 | VGf nerve growth factor inducible precursor | P.PGRPEAQPPPLSSEHKEPVAGDAVPGPK.D               | 3 | 5.89 | 0.53 | -4.37 |
| IPI00069058 | VGf nerve growth factor inducible precursor | P.PGRPEAQPPPLSSEHKEPVAGDAVPGPK.D               | 4 | 6.32 | 0.51 | -3.60 |
| IPI00069058 | VGf nerve growth factor inducible precursor | P.PLSSEHKEPVAGDAVPGPK.D                        | 2 | 4.44 | 0.46 | -2.70 |
| IPI00069058 | VGf nerve growth factor inducible precursor | P.PPLSSEHKEPVAGDAVPGPK.D                       | 2 | 4.43 | 0.51 | -3.12 |
| IPI00069058 | VGf nerve growth factor inducible precursor | P.PPLSSEHKEPVAGDAVPGPK.D                       | 3 | 4.50 | 0.29 | -2.42 |
| IPI00069058 | VGf nerve growth factor inducible precursor | Q.ALDRPASPPAPSGSQQGPEEEAAEALLTETVR.S           | 3 | 6.00 | 0.54 | -3.02 |
| IPI00069058 | VGf nerve growth factor inducible precursor | Q.ARVPERAPLPPPAPSQFQAR.M                       | 3 | 4.85 | 0.36 | -4.04 |
| IPI00069058 | VGf nerve growth factor inducible precursor | Q.DEGELFQGVDP.R.A                              | 2 | 3.61 | 0.27 | -2.97 |
| IPI00069058 | VGf nerve growth factor inducible precursor | Q.TPENGPEASDPSEELEALASLLQELR.D                 | 3 | 3.81 | 0.26 | -2.64 |
| IPI00069058 | VGf nerve growth factor inducible precursor | R.AAPATHVR.S                                   | 1 | 1.54 | 0.15 | -3.29 |
| IPI00069058 | VGf nerve growth factor inducible precursor | R.AAPATHVR.S                                   | 2 | 1.83 | 0.44 | -2.96 |
| IPI00069058 | VGf nerve growth factor inducible precursor | R.ALAAVLLQALDR.P                               | 2 | 3.93 | 0.40 | -3.61 |
| IPI00069058 | VGf nerve growth factor inducible precursor | R.ALAAVLLQALDRPASPPAPSGSQQGPEEEAAEALLTET.V     | 3 | 3.80 | 0.40 | -2.63 |
| IPI00069058 | VGf nerve growth factor inducible precursor | R.ALAAVLLQALDRPASPPAPSGSQQGPEEEAAEALLTET.V.R   | 3 | 6.07 | 0.58 | -4.30 |
| IPI00069058 | VGf nerve growth factor inducible precursor | R.ALAAVLLQALDRPASPPAPSGSQQGPEEEAAEALLTET.V.R   | 4 | 5.00 | 0.36 | -3.96 |
| IPI00069058 | VGf nerve growth factor inducible precursor | R.ALAAVLLQALDRPASPPAPSGSQQGPEEEAAEALLTET.V.R.S | 3 | 6.50 | 0.61 | -4.77 |
| IPI00069058 | VGf nerve growth factor inducible precursor | R.ALAAVLLQALDRPASPPAPSGSQQGPEEEAAEALLTET.V.R.S | 4 | 5.11 | 0.53 | -6.79 |
| IPI00069058 | VGf nerve growth factor inducible precursor | R.ALAAVLLQALDRPASPPAPSGSQQGPEEEAAEALLTET.V.R.S | 5 | 5.50 | 0.50 | -5.50 |
| IPI00069058 | VGf nerve growth factor inducible precursor | R.ALAAVLLQALDRPASPPAPSGSQQGPEEEAAEALLTET.V.R.S | 6 | 4.34 | 0.31 | -4.41 |
| IPI00069058 | VGf nerve growth factor inducible precursor | R.APLPPPAPSQFQAR.M                             | 2 | 2.48 | 0.28 | -5.81 |
| IPI00069058 | VGf nerve growth factor inducible precursor | R.ARQNALLFAEEEDGEAGA.E                         | 2 | 5.01 | 0.60 | -3.43 |
| IPI00069058 | VGf nerve growth factor inducible precursor | R.ARQNALLFAEEEDGEAGA.E.D                       | 2 | 4.24 | 0.49 | 1.05  |
| IPI00069058 | VGf nerve growth factor inducible precursor | R.ARQNALLFAEEEDGEAGA.E.D.K                     | 2 | 6.07 | 0.55 | -3.37 |
| IPI00069058 | VGf nerve growth factor inducible precursor | R.ASWGEFQAR.V                                  | 2 | 2.95 | 0.27 | -2.89 |
| IPI00069058 | VGf nerve growth factor inducible precursor | R.DFSPSSAK.R                                   | 1 | 1.73 | 0.18 | -3.28 |

|             |                                             |                                        |   |      |      |       |
|-------------|---------------------------------------------|----------------------------------------|---|------|------|-------|
| IPI00069058 | VGf nerve growth factor inducible precursor | R.DFSPSSAKR.Q                          | 2 | 1.87 | 0.16 | -2.23 |
| IPI00069058 | VGf nerve growth factor inducible precursor | R.ESAREEEEEAEQERR.G                    | 3 | 3.46 | 0.23 | -3.27 |
| IPI00069058 | VGf nerve growth factor inducible precursor | R.GGEERVGEEDEEEAAEAEAEAEER.A           | 3 | 5.09 | 0.51 | -2.98 |
| IPI00069058 | VGf nerve growth factor inducible precursor | R.GGEERVGEEDEEEAAEAEAEAEERAR.Q         | 3 | 5.96 | 0.46 | -1.42 |
| IPI00069058 | VGf nerve growth factor inducible precursor | R.GGEERVGEEDEEEAAEAEAEAEERAR.Q         | 4 | 4.99 | 0.43 | -2.80 |
| IPI00069058 | VGf nerve growth factor inducible precursor | R.GLQEAEEER.E                          | 1 | 2.13 | 0.07 | -2.29 |
| IPI00069058 | VGf nerve growth factor inducible precursor | R.GLQEAEEER.E                          | 2 | 2.42 | 0.07 | -0.27 |
| IPI00069058 | VGf nerve growth factor inducible precursor | R.GLQEAEEERESAREEEEEAEQE.R             | 2 | 2.98 | 0.37 | -3.30 |
| IPI00069058 | VGf nerve growth factor inducible precursor | R.GLQEAEEERESAREEEEEAEQE.R             | 3 | 3.62 | 0.33 | 0.13  |
| IPI00069058 | VGf nerve growth factor inducible precursor | R.GLQEAEEERESAREEEEEAEQERR.R           | 3 | 3.92 | 0.28 | -3.12 |
| IPI00069058 | VGf nerve growth factor inducible precursor | R.GLQEAEEERESAREEEEEAEQERR.G           | 3 | 3.99 | 0.28 | -3.68 |
| IPI00069058 | VGf nerve growth factor inducible precursor | R.GLQEAEEERESAREEEEEAEQERR.G           | 4 | 2.81 | 0.14 | -4.23 |
| IPI00069058 | VGf nerve growth factor inducible precursor | R.KKNAPPEPVPPPR.A                      | 2 | 3.53 | 0.32 | -4.07 |
| IPI00069058 | VGf nerve growth factor inducible precursor | R.LADLASDLLLQYLLQGGAR.Q                | 2 | 5.69 | 0.42 | -7.37 |
| IPI00069058 | VGf nerve growth factor inducible precursor | R.LADLASDLLLQYLLQGGAR.Q                | 3 | 5.87 | 0.41 | -4.13 |
| IPI00069058 | VGf nerve growth factor inducible precursor | R.LADLASDLLLQYLLQGGAR.Q                | 2 | 4.47 | 0.33 | -4.21 |
| IPI00069058 | VGf nerve growth factor inducible precursor | R.LADLASDLLLQYLLQGGAR.Q                | 3 | 5.00 | 0.41 | -4.42 |
| IPI00069058 | VGf nerve growth factor inducible precursor | R.LLQQGLAQVEAG.R                       | 2 | 3.38 | 0.25 | -3.87 |
| IPI00069058 | VGf nerve growth factor inducible precursor | R.LLQQGLAQVEAGR.R                      | 2 | 3.90 | 0.42 | -3.05 |
| IPI00069058 | VGf nerve growth factor inducible precursor | R.LQEQEELENYIEHVLLR.R                  | 3 | 2.77 | 0.14 | -2.56 |
| IPI00069058 | VGf nerve growth factor inducible precursor | R.M*PDSGPLPETH.K                       | 2 | 3.26 | 0.47 | -2.56 |
| IPI00069058 | VGf nerve growth factor inducible precursor | R.M*PDSGPLPETHK.F                      | 1 | 1.93 | 0.26 | -3.75 |
| IPI00069058 | VGf nerve growth factor inducible precursor | R.M*PDSGPLPETHK.F                      | 2 | 3.60 | 0.35 | -3.05 |
| IPI00069058 | VGf nerve growth factor inducible precursor | R.M*PDSGPLPETHK.F                      | 3 | 2.84 | 0.16 | -3.75 |
| IPI00069058 | VGf nerve growth factor inducible precursor | R.M*PDSGPLPETHKFGEGVSSPK.T             | 2 | 4.21 | 0.50 | -4.75 |
| IPI00069058 | VGf nerve growth factor inducible precursor | R.M*PDSGPLPETHKFGEGVSSPK.T             | 3 | 3.17 | 0.36 | -2.85 |
| IPI00069058 | VGf nerve growth factor inducible precursor | R.M*PDSGPLPETHKFGEGVSSPK.T             | 4 | 2.81 | 0.23 | -2.98 |
| IPI00069058 | VGf nerve growth factor inducible precursor | R.NSEPQDEGELFQGVDPRA                   | 2 | 4.47 | 0.43 | -4.88 |
| IPI00069058 | VGf nerve growth factor inducible precursor | R.NSEPQDEGELFQGVDPRA                   | 3 | 4.18 | 0.42 | -4.02 |
| IPI00069058 | VGf nerve growth factor inducible precursor | R.QAAAQEERLADLASDLLLQYLLQGGAR.Q        | 3 | 3.76 | 0.12 |       |
| IPI00069058 | VGf nerve growth factor inducible precursor | R.QNALLFAEEEDGEAGA.E                   | 2 | 2.91 | 0.29 | -3.80 |
| IPI00069058 | VGf nerve growth factor inducible precursor | R.QNALLFAEEEDGEAGAED.K                 | 2 | 4.73 | 0.53 | -4.03 |
| IPI00069058 | VGf nerve growth factor inducible precursor | R.QNALLFAEEEDGEAGAEDKR.S               | 3 | 3.35 | 0.40 | -1.72 |
| IPI00069058 | VGf nerve growth factor inducible precursor | R.QQETAAAETETR.T                       | 2 | 3.09 | 0.47 | -3.26 |
| IPI00069058 | VGf nerve growth factor inducible precursor | R.RKEAEGTEEGGEEEDDEEM*DPQTIDSLIEL.S    | 3 | 4.02 | 0.38 | -4.65 |
| IPI00069058 | VGf nerve growth factor inducible precursor | R.RKEAEGTEEGGEEEDDEEM*DPQTIDSLIELSTK.L | 3 | 5.88 | 0.58 | -5.21 |
| IPI00069058 | VGf nerve growth factor inducible precursor | R.RKEAEGTEEGGEEEDDEEM*DPQTIDSLIELSTK.L | 4 | 4.87 | 0.45 | -5.08 |
| IPI00069058 | VGf nerve growth factor inducible precursor | R.RLQEQEELENYIEHVLLR.R                 | 3 | 5.85 | 0.40 | -4.66 |
| IPI00069058 | VGf nerve growth factor inducible precursor | R.RLQEQEELENYIEHVLLR.R                 | 4 | 5.49 | 0.34 | -3.42 |
| IPI00069058 | VGf nerve growth factor inducible precursor | R.RPESALLGGSEAGE.R                     | 2 | 4.36 | 0.50 | -1.49 |
| IPI00069058 | VGf nerve growth factor inducible precursor | R.RPESALLGGSEAGER.L                    | 2 | 3.64 | 0.35 | -4.70 |
| IPI00069058 | VGf nerve growth factor inducible precursor | R.RPESALLGGSEAGER.L                    | 3 | 3.92 | 0.36 | -2.91 |

|             |                                                               |                                                     |   |      |      |       |
|-------------|---------------------------------------------------------------|-----------------------------------------------------|---|------|------|-------|
| IPI00069058 | VGf nerve growth factor inducible precursor                   | R.SPQPPPPAPAPARDEL.P.D                              | 2 | 3.50 | 0.44 | -3.67 |
| IPI00069058 | VGf nerve growth factor inducible precursor                   | R.SPQPPPPAPAPARDEL.PD.W                             | 2 | 3.72 | 0.50 | -4.31 |
| IPI00069058 | VGf nerve growth factor inducible precursor                   | R.SPQPPPPAPAPARDEL.PDWN.E                           | 2 | 3.01 | 0.37 | -2.75 |
| IPI00069058 | VGf nerve growth factor inducible precursor                   | R.SPQPPPPAPAPARDEL.PDWN.EV.LPPWDREED.E              | 3 | 4.19 | 0.48 | -3.69 |
| IPI00069058 | VGf nerve growth factor inducible precursor                   | R.SQTHSLPAPESPEPAAPPRPQTPENGPE.A                    | 3 | 3.82 | 0.46 | -2.25 |
| IPI00069058 | VGf nerve growth factor inducible precursor                   | R.SQTHSLPAPESPEPAAPPRPQTPENGPEASD.P                 | 3 | 4.84 | 0.38 | -1.09 |
| IPI00069058 | VGf nerve growth factor inducible precursor                   | R.SQTHSLPAPESPEPAAPPRPQTPENGPEASDPSEE.L             | 3 | 5.18 | 0.50 | -2.18 |
| IPI00069058 | VGf nerve growth factor inducible precursor                   | R.SQTHSLPAPESPEPAAPPRPQTPENGPEASDPSEEL.E            | 3 | 4.38 | 0.52 | -2.97 |
| IPI00069058 | VGf nerve growth factor inducible precursor                   | R.SQTHSLPAPESPEPAAPPRPQTPENGPEASDPSEEELEALAS.L      | 3 | 4.06 | 0.41 | -2.38 |
| IPI00069058 | VGf nerve growth factor inducible precursor                   | R.SQTHSLPAPESPEPAAPPRPQTPENGPEASDPSEEELEALAS.L      | 3 | 4.29 | 0.44 | -2.68 |
| IPI00069058 | VGf nerve growth factor inducible precursor                   | R.SQTHSLPAPESPEPAAPPRPQTPENGPEASDPSEEELEALAS.LLQE.L | 3 | 4.84 | 0.53 | -3.57 |
| IPI00069058 | VGf nerve growth factor inducible precursor                   | R.VGEEDEEAAEAEAEAEAEER.A                            | 2 | 7.22 | 0.49 | -4.71 |
| IPI00069058 | VGf nerve growth factor inducible precursor                   | R.VGEEDEEAAEAEAEAEAEER.A                            | 3 | 5.36 | 0.41 | -4.96 |
| IPI00069058 | VGf nerve growth factor inducible precursor                   | R.VGEEDEEAAEAEAEAEAEERAR.Q                          | 2 | 5.10 | 0.47 | -3.80 |
| IPI00069058 | VGf nerve growth factor inducible precursor                   | R.VGEEDEEAAEAEAEAEAEERAR.Q                          | 3 | 3.50 | 0.25 | -3.36 |
| IPI00069058 | VGf nerve growth factor inducible precursor                   | R.VNLESPGPER.V                                      | 1 | 1.92 | 0.26 | -2.69 |
| IPI00069058 | VGf nerve growth factor inducible precursor                   | R.VNLESPGPER.V                                      | 2 | 3.05 | 0.24 | -1.99 |
| IPI00069058 | VGf nerve growth factor inducible precursor                   | R.VNLESPGPER.VW.R                                   | 2 | 4.06 | 0.49 | -2.74 |
| IPI00069058 | VGf nerve growth factor inducible precursor                   | R.VPERAPLPPPAPSQFQA.R                               | 2 | 3.21 | 0.33 | -2.34 |
| IPI00069058 | VGf nerve growth factor inducible precursor                   | R.VPERAPLPPPAPSQFQAR.M                              | 2 | 3.86 | 0.46 | -3.44 |
| IPI00069058 | VGf nerve growth factor inducible precursor                   | R.VPERAPLPPPAPSQFQAR.M                              | 3 | 4.17 | 0.36 | -3.59 |
| IPI00069058 | VGf nerve growth factor inducible precursor                   | S.EPQDEGELFQGVDP.R.A                                | 2 | 3.48 | 0.43 | -3.86 |
| IPI00071185 | Isoform SV1 of PITSLRE serine/threonine-protein kinase CDC2L1 | R.REVSAHHRMTREDYSDKVK.A                             | 3 | 2.32 | 0.11 | -5.88 |
| IPI00071824 | Isoform 1 of Cytoskeleton-associated protein 2                | R.HTIVDILTMK.S                                      | 2 | 1.50 | 0.07 | -0.17 |
| IPI00072917 | alpha 3 type VI collagen isoform 3 precursor                  | K.ALNLGYALDYAQR.Y                                   | 2 | 4.20 | 0.44 | -4.07 |
| IPI00072917 | alpha 3 type VI collagen isoform 3 precursor                  | K.ALNLGYALDYAQR.Y                                   | 3 | 5.34 | 0.31 | -2.63 |
| IPI00072917 | alpha 3 type VI collagen isoform 3 precursor                  | K.EVYTFASEPNDVFFK.L                                 | 2 | 4.22 | 0.48 | -3.28 |
| IPI00072917 | alpha 3 type VI collagen isoform 3 precursor                  | K.GADQAELEEIAFDSSSLVFIPAEFR.A                       | 2 | 3.69 | 0.43 | -4.11 |
| IPI00072917 | alpha 3 type VI collagen isoform 3 precursor                  | K.GADQAELEEIAFDSSSLVFIPAEFR.A                       | 3 | 3.77 | 0.34 | -0.72 |
| IPI00072917 | alpha 3 type VI collagen isoform 3 precursor                  | K.IASNSATAFR.V                                      | 2 | 2.75 | 0.34 | 0.50  |
| IPI00072917 | alpha 3 type VI collagen isoform 3 precursor                  | K.IGDLHPQIVNLLK.S                                   | 3 | 2.85 | 0.27 | -1.55 |
| IPI00072917 | alpha 3 type VI collagen isoform 3 precursor                  | K.KSQPPPPQPAR.S                                     | 3 | 2.54 | 0.13 | -3.74 |
| IPI00072917 | alpha 3 type VI collagen isoform 3 precursor                  | K.LLPYIVGVAQR.H                                     | 2 | 3.30 | 0.31 | -3.80 |
| IPI00072917 | alpha 3 type VI collagen isoform 3 precursor                  | K.LLTPITTLTSEIQIK.L                                 | 2 | 4.23 | 0.49 | -2.09 |
| IPI00072917 | alpha 3 type VI collagen isoform 3 precursor                  | K.LLVLITGGK.S                                       | 2 | 3.34 | 0.11 | -3.10 |
| IPI00072917 | alpha 3 type VI collagen isoform 3 precursor                  | K.LSDAGITPLFLTR.Q                                   | 2 | 3.63 | 0.30 | -3.51 |
| IPI00072917 | alpha 3 type VI collagen isoform 3 precursor                  | K.LVDFLSR.G                                         | 1 | 2.13 | 0.06 | -4.27 |
| IPI00072917 | alpha 3 type VI collagen isoform 3 precursor                  | K.LVDFLSR.G                                         | 2 | 2.20 | 0.08 | -3.42 |
| IPI00072917 | alpha 3 type VI collagen isoform 3 precursor                  | K.LVDKSTELNNEEPLM*R.F                               | 2 | 4.31 | 0.37 | -1.31 |
| IPI00072917 | alpha 3 type VI collagen isoform 3 precursor                  | K.LVDKSTELNNEEPLM*R.F                               | 3 | 4.77 | 0.20 | -1.18 |
| IPI00072917 | alpha 3 type VI collagen isoform 3 precursor                  | K.M*KPLDGSALYTGSAIDFVR.N                            | 2 | 4.47 | 0.46 | -0.88 |

|             |                                              |                                   |   |      |      |       |
|-------------|----------------------------------------------|-----------------------------------|---|------|------|-------|
| IPI00072917 | alpha 3 type VI collagen isoform 3 precursor | K.M*KPLDGSALYTGSAIDFVR.N          | 3 | 3.56 | 0.16 | -1.97 |
| IPI00072917 | alpha 3 type VI collagen isoform 3 precursor | K.NADPAELEQIVLSPAFILAAESLPK.I     | 2 | 5.33 | 0.45 | -2.60 |
| IPI00072917 | alpha 3 type VI collagen isoform 3 precursor | K.NADPAELEQIVLSPAFILAAESLPK.I     | 3 | 8.08 | 0.58 | -3.61 |
| IPI00072917 | alpha 3 type VI collagen isoform 3 precursor | K.QDVVNAVR.Q                      | 2 | 2.18 | 0.24 | -3.25 |
| IPI00072917 | alpha 3 type VI collagen isoform 3 precursor | K.QFGVAPFTIAR.N                   | 2 | 2.56 | 0.23 | -2.01 |
| IPI00072917 | alpha 3 type VI collagen isoform 3 precursor | K.QSGVVPFIFQAK.N                  | 2 | 3.11 | 0.24 | -3.88 |
| IPI00072917 | alpha 3 type VI collagen isoform 3 precursor | K.SDDEVDDPAVELK.Q                 | 2 | 3.76 | 0.26 | -1.88 |
| IPI00072917 | alpha 3 type VI collagen isoform 3 precursor | K.SLDEISQPAQELKR.S                | 2 | 3.87 | 0.30 | -1.61 |
| IPI00072917 | alpha 3 type VI collagen isoform 3 precursor | K.STELNEEPLM*R.F                  | 2 | 3.25 | 0.24 | -3.07 |
| IPI00072917 | alpha 3 type VI collagen isoform 3 precursor | K.SVEDAQDVSLALTQR.G               | 2 | 3.26 | 0.29 | -5.18 |
| IPI00072917 | alpha 3 type VI collagen isoform 3 precursor | K.VCAPVLAKPGVISVM*GT.-            | 2 | 4.30 | 0.40 | -3.35 |
| IPI00072917 | alpha 3 type VI collagen isoform 3 precursor | K.VNIKEVYTFASEPNDVFFK.L           | 3 | 3.25 | 0.24 | -3.33 |
| IPI00072917 | alpha 3 type VI collagen isoform 3 precursor | K.WYYDPNTK.S                      | 1 | 1.95 | 0.06 | -3.03 |
| IPI00072917 | alpha 3 type VI collagen isoform 3 precursor | K.WYYDPNTK.S                      | 2 | 1.90 | 0.17 | -1.49 |
| IPI00072917 | alpha 3 type VI collagen isoform 3 precursor | K.YIAYLVR.Q                       | 1 | 1.88 | 0.15 | -2.69 |
| IPI00072917 | alpha 3 type VI collagen isoform 3 precursor | K.YIAYLVR.Q                       | 2 | 2.62 | 0.16 | -2.03 |
| IPI00072917 | alpha 3 type VI collagen isoform 3 precursor | R.AAPLQGM*LPGLLAPLR.T             | 2 | 3.19 | 0.39 | -4.76 |
| IPI00072917 | alpha 3 type VI collagen isoform 3 precursor | R.ALGSAIEYTIENVFESAPNPR.D         | 2 | 5.46 | 0.53 | -4.77 |
| IPI00072917 | alpha 3 type VI collagen isoform 3 precursor | R.ALGSAIEYTIENVFESAPNPR.D         | 3 | 4.09 | 0.31 | -5.37 |
| IPI00072917 | alpha 3 type VI collagen isoform 3 precursor | R.ALGSAIEYTIENVFESAPNPR.D         | 4 | 3.41 | 0.44 | -2.78 |
| IPI00072917 | alpha 3 type VI collagen isoform 3 precursor | R.ALILVGLER.V                     | 2 | 2.96 | 0.18 | -1.85 |
| IPI00072917 | alpha 3 type VI collagen isoform 3 precursor | R.DSFQEVLR.F                      | 2 | 2.82 | 0.19 | -1.38 |
| IPI00072917 | alpha 3 type VI collagen isoform 3 precursor | R.DVVFLIDGSQSAGPEFQYVR.T          | 2 | 5.11 | 0.57 | -2.64 |
| IPI00072917 | alpha 3 type VI collagen isoform 3 precursor | R.DVVFLIDGSQSAGPEFQYVR.T          | 3 | 5.06 | 0.54 | -2.25 |
| IPI00072917 | alpha 3 type VI collagen isoform 3 precursor | R.FDEHQSKPEILNLVK.R               | 3 | 3.53 | 0.30 | -3.82 |
| IPI00072917 | alpha 3 type VI collagen isoform 3 precursor | R.GM*TQLQGTR.A                    | 2 | 3.08 | 0.21 | -2.16 |
| IPI00072917 | alpha 3 type VI collagen isoform 3 precursor | R.IAVAQYSDDVK.V                   | 2 | 3.47 | 0.42 | -2.18 |
| IPI00072917 | alpha 3 type VI collagen isoform 3 precursor | R.IAVAQYSDDVKVESR.F               | 3 | 3.26 | 0.46 | -1.68 |
| IPI00072917 | alpha 3 type VI collagen isoform 3 precursor | R.IEDGVPQHLVVLGGK.S               | 3 | 2.56 | 0.30 | -1.60 |
| IPI00072917 | alpha 3 type VI collagen isoform 3 precursor | R.IEEGVPQFLVLISGK.S               | 2 | 3.45 | 0.33 | -2.76 |
| IPI00072917 | alpha 3 type VI collagen isoform 3 precursor | R.ITEGVPQLLIVLTADR.S              | 2 | 4.65 | 0.40 | -0.44 |
| IPI00072917 | alpha 3 type VI collagen isoform 3 precursor | R.ITEGVPQLLIVLTADR.S              | 3 | 2.46 | 0.27 | -2.28 |
| IPI00072917 | alpha 3 type VI collagen isoform 3 precursor | R.KVNIKEVYTFASEPNDVFFK.L          | 2 | 6.49 | 0.59 | -3.61 |
| IPI00072917 | alpha 3 type VI collagen isoform 3 precursor | R.KVNIKEVYTFASEPNDVFFK.L          | 3 | 4.91 | 0.47 | -3.73 |
| IPI00072917 | alpha 3 type VI collagen isoform 3 precursor | R.LEIGQDLIQVAQYADTVRPEFYFNTHPTK.R | 4 | 3.83 | 0.28 | -3.53 |
| IPI00072917 | alpha 3 type VI collagen isoform 3 precursor | R.LLPSFVSSENAFYLSPIR.K            | 2 | 4.61 | 0.45 | -4.66 |
| IPI00072917 | alpha 3 type VI collagen isoform 3 precursor | R.LLPSFVSSENAFYLSPIR.K            | 3 | 3.92 | 0.43 | -5.46 |
| IPI00072917 | alpha 3 type VI collagen isoform 3 precursor | R.LLPSFVSSENAFYLSPIR.Q            | 2 | 3.61 | 0.42 | -2.13 |
| IPI00072917 | alpha 3 type VI collagen isoform 3 precursor | R.LNLLLDLYELAEQLDNIAEK.A          | 2 | 6.10 | 0.49 | -4.80 |
| IPI00072917 | alpha 3 type VI collagen isoform 3 precursor | R.LNLLLDLYELAEQLDNIAEK.A          | 3 | 3.98 | 0.33 | -2.49 |
| IPI00072917 | alpha 3 type VI collagen isoform 3 precursor | R.LQPVLQPLPSPGVGGK.R              | 2 | 3.96 | 0.42 | -3.58 |
| IPI00072917 | alpha 3 type VI collagen isoform 3 precursor | R.LQPVLQPLPSPGVGGK.R.D            | 2 | 2.81 | 0.29 | -2.00 |

|             |                                                                    |                                         |   |      |      |       |
|-------------|--------------------------------------------------------------------|-----------------------------------------|---|------|------|-------|
| IPI00072917 | alpha 3 type VI collagen isoform 3 precursor                       | R.NIDRTELQITNDPR.L                      | 3 | 2.82 | 0.23 | -1.75 |
| IPI00072917 | alpha 3 type VI collagen isoform 3 precursor                       | R.NILVSSAGSR.I                          | 2 | 2.78 | 0.19 | -2.24 |
| IPI00072917 | alpha 3 type VI collagen isoform 3 precursor                       | R.NNLFSSAGYR.A                          | 2 | 3.14 | 0.37 | -1.42 |
| IPI00072917 | alpha 3 type VI collagen isoform 3 precursor                       | R.QINVGNALEYVSR.N                       | 2 | 3.71 | 0.41 | -2.68 |
| IPI00072917 | alpha 3 type VI collagen isoform 3 precursor                       | R.QLGTVQQVISER.V                        | 2 | 3.04 | 0.35 | -2.76 |
| IPI00072917 | alpha 3 type VI collagen isoform 3 precursor                       | R.QLTLLGGPTPNTGAALEFVLR.N               | 2 | 4.06 | 0.48 | -3.10 |
| IPI00072917 | alpha 3 type VI collagen isoform 3 precursor                       | R.QLTLLGGPTPNTGAALEFVLR.N               | 3 | 5.16 | 0.46 | -3.47 |
| IPI00072917 | alpha 3 type VI collagen isoform 3 precursor                       | R.SASSTINLM*VSTEPLALTEIDICKLPK.D        | 3 | 3.72 | 0.27 | -2.09 |
| IPI00072917 | alpha 3 type VI collagen isoform 3 precursor                       | R.SGDDVRNPSVVVK.R                       | 3 | 1.66 | 0.11 | -0.60 |
| IPI00072917 | alpha 3 type VI collagen isoform 3 precursor                       | R.SGDDVRNPSVVVKR.G                      | 3 | 2.66 | 0.27 | 0.20  |
| IPI00072917 | alpha 3 type VI collagen isoform 3 precursor                       | R.SSDRDVGPNLQ                           | 2 | 2.87 | 0.06 | -1.47 |
| IPI00072917 | alpha 3 type VI collagen isoform 3 precursor                       | R.SSGIVSLGVGDR.N                        | 2 | 3.06 | 0.24 | -2.71 |
| IPI00072917 | alpha 3 type VI collagen isoform 3 precursor                       | R.SSIM*AFAIGNK.G                        | 2 | 3.16 | 0.36 | -0.73 |
| IPI00072917 | alpha 3 type VI collagen isoform 3 precursor                       | R.TRPEFYLNLSYM*NKQDVVNAVR.Q             | 3 | 4.47 | 0.51 | -3.31 |
| IPI00072917 | alpha 3 type VI collagen isoform 3 precursor                       | R.TRPEFYLNLSYM*NKQDVVNAVR.Q             | 4 | 3.65 | 0.28 | 1.05  |
| IPI00072917 | alpha 3 type VI collagen isoform 3 precursor                       | R.VAVVQYSDR.T                           | 2 | 3.07 | 0.23 | -1.69 |
| IPI00072917 | alpha 3 type VI collagen isoform 3 precursor                       | R.VNHVPEAGSR.L                          | 2 | 2.43 | 0.23 | -0.11 |
| IPI00072917 | alpha 3 type VI collagen isoform 3 precursor                       | R.VVESLDVQDR.V                          | 2 | 3.24 | 0.38 | -2.67 |
| IPI00072917 | alpha 3 type VI collagen isoform 3 precursor                       | R.YPPPAVESDAADIVFLIDSSSEGVPRPDGFAHIR.D  | 4 | 4.49 | 0.40 | -3.68 |
| IPI00073763 | Semaphorin-4C precursor                                            | K.LLFAGRSRQLVQLPVADCMKYR.S              | 3 | 2.95 | 0.20 |       |
| IPI00075013 | Complement C1q tumor necrosis factor-related protein 1 precursor   | K.SHYAAFSVGR.K                          | 2 | 2.00 | 0.26 |       |
| IPI00075013 | Complement C1q tumor necrosis factor-related protein 1 precursor   | K.YRPSQDQGLPASR.C                       | 2 | 2.21 | 0.14 | -1.38 |
| IPI00075248 | Calmodulin                                                         | K.EAFSLFDKDGDTITTK.E                    | 2 | 4.49 | 0.40 | -1.90 |
| IPI00075248 | Calmodulin                                                         | K.EAFSLFDKDGDTITTK.E                    | 3 | 2.62 | 0.19 | -0.88 |
| IPI00075248 | Calmodulin                                                         | L.FDKDGDTITTK.E                         | 2 | 3.05 | 0.35 | -1.16 |
| IPI00075248 | Calmodulin                                                         | R.EADIDGDGQVNYEEFVQMMTAK.-              | 2 | 4.65 | 0.59 | -2.24 |
| IPI00075248 | Calmodulin                                                         | R.EADIDGDGQVNYEEFVQMMTAK.-              | 3 | 3.15 | 0.38 | -2.41 |
| IPI00075248 | Calmodulin                                                         | R.VFDKDGNGYISAAELR.H                    | 2 | 4.15 | 0.40 | 0.94  |
| IPI00075248 | Calmodulin                                                         | R.VFDKDGNGYISAAELR.H                    | 3 | 2.67 | 0.18 | -0.23 |
| IPI00081836 | Histone H2A type 1-H                                               | R.AGLQFPVGR.I                           | 2 | 2.49 | 0.10 | -2.97 |
| IPI00081836 | Histone H2A type 1-H                                               | R.HLQLAIRNDEELNKLKLVIAQGGVLPNIQAVLLPK.K | 4 | 3.02 | 0.27 | -2.89 |
| IPI00081836 | Histone H2A type 1-H                                               | R.HLQLAIRNDEELNKLKLVIAQGGVLPNIQAVLLPK.K | 5 | 2.23 | 0.19 | -3.80 |
| IPI00081836 | Histone H2A type 1-H                                               | R.VTIAQGGVLPNIQAVLLPK.K                 | 2 | 4.34 | 0.48 | -3.79 |
| IPI00090764 | Toll-like receptor 1 precursor                                     | K.NFTVSGTRM*VHMLCPSK.I                  | 2 | 2.49 | 0.17 |       |
| IPI00098902 | 2-oxoglutarate dehydrogenase E1 component, mitochondrial precursor | R.TVDWALAEYMAFGSLK.E                    | 3 | 2.51 | 0.10 | -1.27 |
| IPI00099650 | Protein jagged-1 precursor                                         | K.IIDLVSKR.D                            | 2 | 2.19 | 0.10 | -4.56 |
| IPI00099650 | Protein jagged-1 precursor                                         | R.IVLPFSFAWPR.S                         | 2 | 3.09 | 0.26 | -3.35 |
| IPI00099670 | carboxyl ester lipase precursor                                    | K.LGAVYTEGGFVEGVNKK.L                   | 3 | 2.39 | 0.08 | -1.81 |
| IPI00099670 | carboxyl ester lipase precursor                                    | K.TYAYLFSHPSR.M                         | 2 | 3.48 | 0.45 | -2.37 |



|             |                                                                     |                                               |   |      |      |       |
|-------------|---------------------------------------------------------------------|-----------------------------------------------|---|------|------|-------|
| IPI00099670 | carboxyl ester lipase precursor                                     | K.VGCPVGDAAAR.M                               | 2 | 2.20 | 0.12 | 0.21  |
| IPI00099670 | carboxyl ester lipase precursor                                     | K.VTEEDFYKLVSEFTITK.G                         | 3 | 3.02 | 0.15 | -3.53 |
| IPI00099838 | Isoform 1 of Lysophosphatidic acid phosphatase type 6 precursor     | K.NYVEDIPFLSPTFNPQEVFIR.S                     | 3 | 2.64 | 0.17 | -5.20 |
| IPI00100154 | Toll-interacting protein                                            | R.GNKDAAINSLQM*GEEP.-                         | 2 | 4.05 | 0.28 | -2.59 |
| IPI00100154 | Toll-interacting protein                                            | R.GPVYIGELPQDFLR.I                            | 2 | 4.12 | 0.42 | -3.24 |
| IPI00100980 | EH domain-containing protein 2                                      | R.LVRVHAYIISYLKKEMPSVFGK.E                    | 3 | 3.55 | 0.08 |       |
| IPI00101608 | Isoform 2 of Cysteine-rich with EGF-like domain protein 1 precursor | K.QQEAPDLFQWLCSDSLK.L                         | 2 | 3.28 | 0.32 | -4.69 |
| IPI00101608 | Isoform 2 of Cysteine-rich with EGF-like domain protein 1 precursor | K.QQEAPDLFQWLCSDSLK.L                         | 3 | 3.55 | 0.27 | -3.55 |
| IPI00101608 | Isoform 2 of Cysteine-rich with EGF-like domain protein 1 precursor | R.DEATFPGLYGK.Q                               | 2 | 2.29 | 0.26 | -2.65 |
| IPI00101608 | Isoform 2 of Cysteine-rich with EGF-like domain protein 1 precursor | R.GLVDSFNK.G                                  | 1 | 2.05 | 0.16 | -3.02 |
| IPI00101608 | Isoform 2 of Cysteine-rich with EGF-like domain protein 1 precursor | R.TIRDNFGGGNTAWEEENLSKYK.D                    | 3 | 2.18 | 0.14 | -1.36 |
| IPI00101927 | Leucine zipper putative tumor suppressor 2                          | K.QLQHNYIQMYRRNRQLEQELQQLSLELEAR.E            | 3 | 1.64 | 0.20 | 1.96  |
| IPI00102435 | collagen, type XXI, alpha 1 precursor                               | K.AIQFALDYLFK.S                               | 2 | 3.59 | 0.42 | -4.28 |
| IPI00102435 | collagen, type XXI, alpha 1 precursor                               | K.IAVVLTGDK.S                                 | 2 | 2.91 | 0.29 | -2.97 |
| IPI00102435 | collagen, type XXI, alpha 1 precursor                               | K.IAVVLTGDKSQDDVKDAAQAAR.D                    | 3 | 3.72 | 0.46 | -3.04 |
| IPI00102435 | collagen, type XXI, alpha 1 precursor                               | K.SQDDVKDAAQAAR.D                             | 2 | 4.05 | 0.42 | -2.10 |
| IPI00102435 | collagen, type XXI, alpha 1 precursor                               | K.VDLSELTSNVFPEGLPPSYVVFSTQR.F                | 3 | 3.99 | 0.42 | -3.64 |
| IPI00102435 | collagen, type XXI, alpha 1 precursor                               | K.YSGKEETVQFDVQK.L                            | 2 | 4.18 | 0.32 | -2.43 |
| IPI00102435 | collagen, type XXI, alpha 1 precursor                               | K.YSGKEETVQFDVQK.L                            | 3 | 3.68 | 0.30 | -1.21 |
| IPI00102543 | SLIT and NTRK-like protein 1 precursor                              | K.DFM*LLSNDEICPQLYAR.I                        | 2 | 4.71 | 0.49 | -1.71 |
| IPI00102543 | SLIT and NTRK-like protein 1 precursor                              | K.KGFTSLQR.F                                  | 1 | 2.14 | 0.17 | -5.16 |
| IPI00102543 | SLIT and NTRK-like protein 1 precursor                              | K.LSNVQELFLR.D                                | 2 | 4.22 | 0.28 | -2.09 |
| IPI00102543 | SLIT and NTRK-like protein 1 precursor                              | K.LSNVQELFLRDNK.I                             | 3 | 2.61 | 0.17 | -2.75 |
| IPI00102543 | SLIT and NTRK-like protein 1 precursor                              | K.QTFLGLDDLEYLQADFNLRL.D                      | 2 | 6.32 | 0.55 | -7.28 |
| IPI00102543 | SLIT and NTRK-like protein 1 precursor                              | K.QTFLGLDDLEYLQADFNLRL.D                      | 3 | 6.31 | 0.42 | -6.18 |
| IPI00102543 | SLIT and NTRK-like protein 1 precursor                              | K.SHFVDYK.N                                   | 1 | 2.21 | 0.09 | -3.33 |
| IPI00102543 | SLIT and NTRK-like protein 1 precursor                              | R.DIDPGAFQDLNK.L                              | 2 | 3.11 | 0.36 | -2.07 |
| IPI00102543 | SLIT and NTRK-like protein 1 precursor                              | R.DIDPGAFQDLNKLEVLILNDNLISTLPANVFQYVPITHDLR.G | 3 | 3.41 | 0.39 | -4.22 |
| IPI00102543 | SLIT and NTRK-like protein 1 precursor                              | R.DIDPGAFQDLNKLEVLILNDNLISTLPANVFQYVPITHDLR.G | 4 | 5.13 | 0.48 | -4.35 |
| IPI00102543 | SLIT and NTRK-like protein 1 precursor                              | R.FTAPTSQFYHLFLHGNSLTR.L                      | 2 | 4.97 | 0.45 | -4.70 |
| IPI00102543 | SLIT and NTRK-like protein 1 precursor                              | R.FTAPTSQFYHLFLHGNSLTR.L                      | 3 | 3.03 | 0.30 | -4.55 |
| IPI00102543 | SLIT and NTRK-like protein 1 precursor                              | R.FTAPTSQFYHLFLHGNSLTR.L                      | 4 | 2.25 | 0.25 | -3.52 |
| IPI00102543 | SLIT and NTRK-like protein 1 precursor                              | R.IILNLLR.S                                   | 2 | 3.27 | 0.16 | -2.04 |
| IPI00102543 | SLIT and NTRK-like protein 1 precursor                              | R.KQTFGLDDLEYLQADFNLRL.D                      | 2 | 5.31 | 0.49 | -1.47 |
| IPI00102543 | SLIT and NTRK-like protein 1 precursor                              | R.KQTFGLDDLEYLQADFNLRL.D                      | 3 | 4.29 | 0.35 | -5.40 |
| IPI00102543 | SLIT and NTRK-like protein 1 precursor                              | R.LGSEVLM*SDLKCETPVNFRR.K                     | 3 | 4.71 | 0.54 | -3.36 |

|             |                                                       |                                        |   |      |      |       |
|-------------|-------------------------------------------------------|----------------------------------------|---|------|------|-------|
| IPI00102543 | SLIT and NTRK-like protein 1 precursor                | R.SLPVDVFAGVLSK.L                      | 2 | 3.96 | 0.35 | -3.21 |
| IPI00102543 | SLIT and NTRK-like protein 1 precursor                | R.VVCEAPTR.L                           | 1 | 1.38 | 0.10 | -2.32 |
| IPI00102543 | SLIT and NTRK-like protein 1 precursor                | R.VVCEAPTR.L                           | 2 | 2.64 | 0.33 | -2.00 |
| IPI00102543 | SLIT and NTRK-like protein 1 precursor                | R.WLYM*DSNYLDTLSR.E                    | 2 | 4.76 | 0.48 | -5.77 |
| IPI00102575 | ATPase family, AAA domain containing 5                | K.AKALHISRKVTTEEIAIPLR.R               | 3 | 2.17 | 0.21 |       |
| IPI00102575 | ATPase family, AAA domain containing 5                | R.KTSIPVKDIKLTQSKAESEASLLNVSTPK.S      | 2 | 1.23 | 0.10 | 1.59  |
| IPI00102575 | ATPase family, AAA domain containing 5                | T.TSHANSRDNVTEAAQLNDSIITVSYEEFLKSHK.E  | 3 | 3.95 | 0.17 | -1.82 |
| IPI00102678 | Isoform 1 of Pecanex-like protein 1                   | K.SKPLKAEKSM*DSLRSLSR.S                | 2 | 2.26 | 0.07 | -4.09 |
| IPI00102808 | Isoform 1 of Dual specificity protein phosphatase 19  | K.NARPSICPNSGFM*EQLRTYQEGKESNK.C       | 3 | 2.84 | 0.05 | -8.44 |
| IPI00103175 | Isoform 1 of Soluble calcium-activated nucleotidase 1 | K.AEWLAVKDER.L                         | 2 | 2.51 | 0.09 | -2.16 |
| IPI00103175 | Isoform 1 of Soluble calcium-activated nucleotidase 1 | K.AEWLAVKDER.L                         | 3 | 2.40 | 0.16 | -3.31 |
| IPI00103175 | Isoform 1 of Soluble calcium-activated nucleotidase 1 | K.AVPWVILSDGDGTVEK.G                   | 2 | 4.41 | 0.48 | -2.97 |
| IPI00103175 | Isoform 1 of Soluble calcium-activated nucleotidase 1 | K.GANLLLSASPDFGDIAVSHVGAVVPTHGFSSFK.F  | 4 | 3.26 | 0.18 | -2.85 |
| IPI00103175 | Isoform 1 of Soluble calcium-activated nucleotidase 1 | K.IGSVKYEIEFI.-                        | 2 | 3.73 | 0.38 | -3.63 |
| IPI00103175 | Isoform 1 of Soluble calcium-activated nucleotidase 1 | K.LYSVDDR.T                            | 1 | 1.65 | 0.08 | -3.47 |
| IPI00103175 | Isoform 1 of Soluble calcium-activated nucleotidase 1 | K.LYSVDDR.T                            | 2 | 2.07 | 0.20 | -3.62 |
| IPI00103175 | Isoform 1 of Soluble calcium-activated nucleotidase 1 | K.YEGIEFI.-                            | 1 | 1.73 | 0.19 | -2.73 |
| IPI00103175 | Isoform 1 of Soluble calcium-activated nucleotidase 1 | R.AQEENTWFSYLK.K                       | 2 | 2.99 | 0.35 | -4.05 |
| IPI00103175 | Isoform 1 of Soluble calcium-activated nucleotidase 1 | R.GM*ELSDLIVFNGK.L                     | 2 | 3.58 | 0.26 | -2.95 |
| IPI00103175 | Isoform 1 of Soluble calcium-activated nucleotidase 1 | R.IAVIADLDTESR.A                       | 2 | 4.32 | 0.47 | -3.21 |
| IPI00103175 | Isoform 1 of Soluble calcium-activated nucleotidase 1 | R.KGANLLLSASPDFGDIAVSHVGAVVPTHGFSSFK.F | 4 | 3.21 | 0.33 | -2.84 |
| IPI00103175 | Isoform 1 of Soluble calcium-activated nucleotidase 1 | R.LYVGGLGK.E                           | 1 | 2.20 | 0.15 | -3.08 |
| IPI00103175 | Isoform 1 of Soluble calcium-activated nucleotidase 1 | R.TGVVYQIEGSK.A                        | 1 | 2.42 | 0.20 | -3.57 |
| IPI00103175 | Isoform 1 of Soluble calcium-activated nucleotidase 1 | R.TGVVYQIEGSK.A                        | 2 | 3.70 | 0.44 | -2.81 |
| IPI00103175 | Isoform 1 of Soluble calcium-activated nucleotidase 1 | R.VASYIM*AFTLDGR.F                     | 2 | 4.18 | 0.44 | -4.39 |

|             |                                                                          |                                    |   |      |      |       |
|-------------|--------------------------------------------------------------------------|------------------------------------|---|------|------|-------|
| IPI00103175 | Isoform 1 of Soluble calcium-activated nucleotidase 1                    | R.VASYIMAFTLDGR.F                  | 2 | 3.75 | 0.51 | -4.50 |
| IPI00103471 | Thioredoxin-like selenoprotein M precursor                               | K.AFVTQDIPFYHNLVM*K.H              | 2 | 3.97 | 0.38 | -3.10 |
| IPI00103471 | Thioredoxin-like selenoprotein M precursor                               | K.AFVTQDIPFYHNLVM*K.H              | 3 | 2.61 | 0.23 | -2.30 |
| IPI00103471 | Thioredoxin-like selenoprotein M precursor                               | R.EEINALVQELGFYR.K                 | 2 | 4.80 | 0.36 | -3.58 |
| IPI00103471 | Thioredoxin-like selenoprotein M precursor                               | R.EEINALVQELGFYR.K                 | 3 | 2.62 | 0.25 | -2.62 |
| IPI00103471 | Thioredoxin-like selenoprotein M precursor                               | R.IPLSEM*TREEINALVQELGFYR.K        | 3 | 4.64 | 0.36 | -2.12 |
| IPI00103471 | Thioredoxin-like selenoprotein M precursor                               | R.IPLSEM*TREEINALVQELGFYR.K        | 4 | 2.72 | 0.21 | -4.46 |
| IPI00103471 | Thioredoxin-like selenoprotein M precursor                               | R.RYEELER.I                        | 2 | 1.97 | 0.06 | 0.48  |
| IPI00103471 | Thioredoxin-like selenoprotein M precursor                               | R.RYEELERIPLSEM*TR.E               | 3 | 2.20 | 0.30 | -0.46 |
| IPI00103471 | Thioredoxin-like selenoprotein M precursor                               | R.RYEELERIPLSEM*TR.E               | 4 | 2.36 | 0.15 | -0.68 |
| IPI00103510 | Relaxin receptor 2                                                       | R.KSIFKIKKKSLSTSIVWIEDSSSLK.L      | 3 | 2.99 | 0.12 |       |
| IPI00103552 | Mucin-16                                                                 | R.FPQSVVTPM*SR.G                   | 2 | 1.95 | 0.19 |       |
| IPI00103597 | Isoform 1 of VPS10 domain-containing receptor SorCS1 precursor           | K.SIFDRRCAEDYRPWQLHSQGEACIMGAK.R   | 3 | 1.75 | 0.21 | 1.44  |
| IPI00103597 | Isoform 1 of VPS10 domain-containing receptor SorCS1 precursor           | K.TIAVYEEFR.S                      | 2 | 2.97 | 0.37 | -2.27 |
| IPI00103597 | Isoform 1 of VPS10 domain-containing receptor SorCS1 precursor           | K.TILSYLYVCPTNK.R                  | 2 | 3.79 | 0.38 | -5.24 |
| IPI00103597 | Isoform 1 of VPS10 domain-containing receptor SorCS1 precursor           | K.VSENPYTSIIASK.D                  | 2 | 4.10 | 0.49 | -2.55 |
| IPI00103597 | Isoform 1 of VPS10 domain-containing receptor SorCS1 precursor           | R.GTGASM*AVAAR.S                   | 2 | 3.51 | 0.34 | -3.47 |
| IPI00103597 | Isoform 1 of VPS10 domain-containing receptor SorCS1 precursor           | R.NAFAQM*K.L                       | 1 | 1.83 | 0.08 | -3.12 |
| IPI00103597 | Isoform 1 of VPS10 domain-containing receptor SorCS1 precursor           | R.STDDLEQISELLIHTLNQNSVHFELKPGVR.V | 3 | 6.64 | 0.59 | -4.57 |
| IPI00103597 | Isoform 1 of VPS10 domain-containing receptor SorCS1 precursor           | R.STDDLEQISELLIHTLNQNSVHFELKPGVR.V | 4 | 4.36 | 0.27 | -3.32 |
| IPI00103597 | Isoform 1 of VPS10 domain-containing receptor SorCS1 precursor           | R.STDDLEQISELLIHTLNQNSVHFELKPGVR.V | 5 | 3.35 | 0.23 | -2.29 |
| IPI00103597 | Isoform 1 of VPS10 domain-containing receptor SorCS1 precursor           | R.STDYGTTYEK.L                     | 2 | 3.12 | 0.29 | -2.90 |
| IPI00103597 | Isoform 1 of VPS10 domain-containing receptor SorCS1 precursor           | R.STDYGTTYEK.LNDK.V                | 2 | 3.71 | 0.51 | 0.07  |
| IPI00103597 | Isoform 1 of VPS10 domain-containing receptor SorCS1 precursor           | R.WQLIQEGVVPNR.F                   | 2 | 3.36 | 0.28 | -3.64 |
| IPI00103630 | Isoform 2 of Protein phosphatase 1E                                      | R.FNPKFYSFLSAQEPSHK.I              | 2 | 2.32 | 0.13 |       |
| IPI00103755 | Isoform 2 of Netrin receptor UNC5D precursor                             | R.ADHNLIR.Q                        | 2 | 2.05 | 0.08 | -3.20 |
| IPI00103755 | Isoform 2 of Netrin receptor UNC5D precursor                             | R.KNFEQDPQGR.E                     | 2 | 2.03 | 0.21 | -1.65 |
| IPI00103853 | Isoform 1 of Putative ribosome-binding factor A, mitochondrial precursor | L.YDLNVELSK.V                      | 2 | 3.03 | 0.24 | -1.51 |

|             |                                                                             |                                          |   |      |      |       |
|-------------|-----------------------------------------------------------------------------|------------------------------------------|---|------|------|-------|
| IPI00103871 | Isoform 1 of Roundabout homolog 4 precursor                                 | K.VSGPAAPAQSYTALFR.T                     | 2 | 4.08 | 0.46 | -4.49 |
| IPI00103871 | Isoform 1 of Roundabout homolog 4 precursor                                 | R.ARGPDSNVLLLR.L                         | 2 | 2.25 | 0.15 | -3.14 |
| IPI00103871 | Isoform 1 of Roundabout homolog 4 precursor                                 | R.LSVAVLREDFQIQPR.D                      | 3 | 4.26 | 0.41 | -3.60 |
| IPI00103871 | Isoform 1 of Roundabout homolog 4 precursor                                 | R.VSIQEPQDYTEPVELLAVR.I                  | 2 | 5.14 | 0.44 | -5.86 |
| IPI00103874 | Isoform 1 of Zinc finger FYVE domain-containing protein 1                   | K.RTHSGGNK.R                             | 2 | 1.54 | 0.09 | 2.76  |
| IPI00103891 | Putative uncharacterized protein                                            | R.SANSGSLKKEPLILSTECPLEPATTLR.G          | 4 | 2.83 | 0.15 | 1.61  |
| IPI00104074 | Isoform 1 of Scavenger receptor cysteine-rich type 1 protein M130 precursor | K.AM*SIPM*WVDNVQCPK.G                    | 2 | 3.40 | 0.44 | -2.42 |
| IPI00104074 | Isoform 1 of Scavenger receptor cysteine-rich type 1 protein M130 precursor | K.CGVALSTPGGAR.F                         | 2 | 2.47 | 0.17 | -1.97 |
| IPI00104074 | Isoform 1 of Scavenger receptor cysteine-rich type 1 protein M130 precursor | K.GKINPASLDK.A                           | 2 | 2.23 | 0.13 | -1.96 |
| IPI00104074 | Isoform 1 of Scavenger receptor cysteine-rich type 1 protein M130 precursor | K.INPASLDK.A                             | 1 | 1.75 | 0.10 | -1.98 |
| IPI00104074 | Isoform 1 of Scavenger receptor cysteine-rich type 1 protein M130 precursor | K.SSM*SETTVGVVCR.Q                       | 2 | 3.67 | 0.45 | -1.94 |
| IPI00104074 | Isoform 1 of Scavenger receptor cysteine-rich type 1 protein M130 precursor | K.TSYQVYSK.I                             | 1 | 1.96 | 0.10 | -1.98 |
| IPI00104074 | Isoform 1 of Scavenger receptor cysteine-rich type 1 protein M130 precursor | K.TSYQVYSK.I                             | 2 | 2.97 | 0.30 | 1.06  |
| IPI00104074 | Isoform 1 of Scavenger receptor cysteine-rich type 1 protein M130 precursor | R.CAGTVEVEIQR.L                          | 2 | 3.69 | 0.31 | -3.13 |
| IPI00104074 | Isoform 1 of Scavenger receptor cysteine-rich type 1 protein M130 precursor | R.DVGVVCSR.Y                             | 2 | 2.60 | 0.36 | -3.86 |
| IPI00104074 | Isoform 1 of Scavenger receptor cysteine-rich type 1 protein M130 precursor | R.HKEDAGVICSEFM*SLR.L                    | 3 | 3.41 | 0.23 | -3.49 |
| IPI00104074 | Isoform 1 of Scavenger receptor cysteine-rich type 1 protein M130 precursor | R.LASPSEETWITCDNK.I                      | 2 | 4.62 | 0.51 | -2.69 |
| IPI00104074 | Isoform 1 of Scavenger receptor cysteine-rich type 1 protein M130 precursor | R.LQEGPTSCSGR.V                          | 2 | 2.82 | 0.32 | -1.55 |
| IPI00104074 | Isoform 1 of Scavenger receptor cysteine-rich type 1 protein M130 precursor | R.LVGGDIPCSGR.V                          | 2 | 3.18 | 0.35 | -2.12 |
| IPI00104074 | Isoform 1 of Scavenger receptor cysteine-rich type 1 protein M130 precursor | R.VEIHGGSWGTVCDSDWLDLDDAQVVCQQLGCGPALK.A | 3 | 5.90 | 0.52 | -5.52 |
| IPI00104074 | Isoform 1 of Scavenger receptor cysteine-rich type 1 protein M130 precursor | R.VEIHGGSWGTVCDSDWLDLDDAQVVCQQLGCGPALK.A | 4 | 4.25 | 0.37 | -4.33 |
| IPI00104074 | Isoform 1 of Scavenger receptor cysteine-rich type 1 protein M130 precursor | R.WGTVCDNFNIDHASVICR.Q                   | 3 | 3.19 | 0.44 | -2.16 |
| IPI00104907 | Isoform 1 of Uncharacterized potential DNA-binding protein C14orf106        | K.MTTFNK.N                               | 2 | 1.64 | 0.08 | -3.20 |
| IPI00106502 | Kelch-like ECH-associated protein 1                                         | R.LLYAVGGFDGTNR.L                        | 2 | 3.11 | 0.14 |       |

|             |                                                                                                       |                                |   |      |      |       |
|-------------|-------------------------------------------------------------------------------------------------------|--------------------------------|---|------|------|-------|
| IPI00106506 | Isoform 1 of Evolutionarily conserved signaling intermediate in Toll pathway, mitochondrial precursor | R.LAGSTR.E                     | 1 | 1.60 | 0.11 | -8.34 |
| IPI00106646 | 45 kDa calcium-binding protein precursor                                                              | K.DLGGFDEDAEPR.R               | 1 | 2.55 | 0.31 | -1.91 |
| IPI00106646 | 45 kDa calcium-binding protein precursor                                                              | K.DLGGFDEDAEPR.R               | 2 | 4.24 | 0.39 | -2.54 |
| IPI00106646 | 45 kDa calcium-binding protein precursor                                                              | K.DLGGFDEDAEPRR.S              | 2 | 2.21 | 0.14 | -2.39 |
| IPI00106646 | 45 kDa calcium-binding protein precursor                                                              | K.GHSEKEVADAIR.L               | 2 | 3.48 | 0.37 |       |
| IPI00106646 | 45 kDa calcium-binding protein precursor                                                              | K.LEM*DGHLNR.G                 | 2 | 3.00 | 0.16 | -2.43 |
| IPI00106646 | 45 kDa calcium-binding protein precursor                                                              | R.ERVANREENEILPPDHLNGVK.L      | 3 | 3.66 | 0.19 | -3.68 |
| IPI00106646 | 45 kDa calcium-binding protein precursor                                                              | R.GFHQEVFLGK.D                 | 1 | 2.33 | 0.14 | -4.14 |
| IPI00106646 | 45 kDa calcium-binding protein precursor                                                              | R.GFHQEVFLGK.D                 | 2 | 3.43 | 0.29 | -4.93 |
| IPI00106646 | 45 kDa calcium-binding protein precursor                                                              | R.GFHQEVFLGKDLGGFDEDAEPR.R     | 3 | 3.26 | 0.38 | -3.55 |
| IPI00106646 | 45 kDa calcium-binding protein precursor                                                              | R.GFHQEVFLGKDLGGFDEDAEPR.R     | 4 | 3.10 | 0.14 | -3.63 |
| IPI00106646 | 45 kDa calcium-binding protein precursor                                                              | R.GFHQEVFLGKDLGGFDEDAEPRR.S    | 3 | 3.61 | 0.20 | -4.16 |
| IPI00106646 | 45 kDa calcium-binding protein precursor                                                              | R.GFHQEVFLGKDLGGFDEDAEPRR.S    | 4 | 3.55 | 0.22 | -3.90 |
| IPI00106646 | 45 kDa calcium-binding protein precursor                                                              | R.VANREENEILPPDHLNGVK.L        | 3 | 3.02 | 0.11 | -2.34 |
| IPI00107731 | Isoform 6 of Osteoclast associated immunoglobulin-like receptor precursor                             | R.DVSSELAEFFLEEVTQAQGGSYR.C    | 2 | 4.82 | 0.48 | -3.23 |
| IPI00107731 | Isoform 6 of Osteoclast associated immunoglobulin-like receptor precursor                             | R.DVSSELAEFFLEEVTQAQGGSYR.C    | 3 | 5.49 | 0.45 | -2.96 |
| IPI00107731 | Isoform 6 of Osteoclast associated immunoglobulin-like receptor precursor                             | R.EGVAAPLQYR.H                 | 2 | 2.57 | 0.21 | -2.34 |
| IPI00107731 | Isoform 6 of Osteoclast associated immunoglobulin-like receptor precursor                             | R.FGLFKPGEIAPLLFR.D            | 3 | 3.00 | 0.29 | -2.27 |
| IPI00107831 | Receptor-type tyrosine-protein phosphatase F precursor                                                | K.DFLPVDPATSNR.I               | 2 | 2.71 | 0.21 | -5.46 |
| IPI00107831 | Receptor-type tyrosine-protein phosphatase F precursor                                                | K.GSGPLSPSIQSR.T               | 2 | 2.96 | 0.23 | -1.81 |
| IPI00107831 | Receptor-type tyrosine-protein phosphatase F precursor                                                | K.LIADLQPNTSEYFVLM*NR.G        | 2 | 4.72 | 0.53 | -3.51 |
| IPI00107831 | Receptor-type tyrosine-protein phosphatase F precursor                                                | K.LIADLQPNTSEYFVLM*NR.G        | 3 | 4.40 | 0.48 | -2.30 |
| IPI00107831 | Receptor-type tyrosine-protein phosphatase F precursor                                                | K.LSVLEEEQLPPGFPSIDM*GPQLK.V   | 2 | 3.51 | 0.35 | -3.62 |
| IPI00107831 | Receptor-type tyrosine-protein phosphatase F precursor                                                | K.VM*CVSM*GSTTVR.V             | 2 | 1.50 | 0.20 | -1.40 |
| IPI00107831 | Receptor-type tyrosine-protein phosphatase F precursor                                                | K.VPEDQTGLSGGVASFVCQATGEPKPR.I | 3 | 5.11 | 0.56 | -5.54 |
| IPI00107831 | Receptor-type tyrosine-protein phosphatase F precursor                                                | K.VSSQRFEVIEFDDGAGSVLR.I       | 3 | 4.51 | 0.32 | -0.86 |
| IPI00107831 | Receptor-type tyrosine-protein phosphatase F precursor                                                | K.VTFDPTSSYTLEDLKPDTLYR.F      | 3 | 2.65 | 0.28 | -3.95 |

|             |                                                        |                                       |   |      |      |       |
|-------------|--------------------------------------------------------|---------------------------------------|---|------|------|-------|
| IPI00107831 | Receptor-type tyrosine-protein phosphatase F precursor | R.AAGTEGPFQEVDGVATTR.Y                | 2 | 4.64 | 0.45 | -2.77 |
| IPI00107831 | Receptor-type tyrosine-protein phosphatase F precursor | R.AHTDVGPGPESSPVLVR.T                 | 2 | 4.40 | 0.45 | -1.90 |
| IPI00107831 | Receptor-type tyrosine-protein phosphatase F precursor | R.AHTDVGPGPESSPVLVR.T                 | 3 | 4.45 | 0.31 | -0.88 |
| IPI00107831 | Receptor-type tyrosine-protein phosphatase F precursor | R.DEAIYECTATNSLGEINTSAK.L             | 2 | 5.43 | 0.52 | -2.58 |
| IPI00107831 | Receptor-type tyrosine-protein phosphatase F precursor | R.FEVIEFDDGAGSVLR.I                   | 2 | 5.17 | 0.53 | -4.04 |
| IPI00107831 | Receptor-type tyrosine-protein phosphatase F precursor | R.FTLTGLKPDTTYDIK.V                   | 3 | 2.91 | 0.16 | -2.43 |
| IPI00107831 | Receptor-type tyrosine-protein phosphatase F precursor | R.GFYNRPLSPDLSYQCFVLASLKEPM*DQKR.Y    | 5 | 3.09 | 0.27 | -2.96 |
| IPI00107831 | Receptor-type tyrosine-protein phosphatase F precursor | R.GPPSEAVR.A                          | 2 | 1.65 | 0.12 | -3.49 |
| IPI00107831 | Receptor-type tyrosine-protein phosphatase F precursor | R.GYQVTVVR.L                          | 2 | 2.73 | 0.33 | -1.26 |
| IPI00107831 | Receptor-type tyrosine-protein phosphatase F precursor | R.IISYTVVFR.D                         | 2 | 1.94 | 0.09 | -2.44 |
| IPI00107831 | Receptor-type tyrosine-protein phosphatase F precursor | R.NVLELSNVVR.S                        | 1 | 2.98 | 0.32 | -4.23 |
| IPI00107831 | Receptor-type tyrosine-protein phosphatase F precursor | R.NVLELSNVVR.S                        | 2 | 3.57 | 0.26 | -2.44 |
| IPI00107831 | Receptor-type tyrosine-protein phosphatase F precursor | R.SDM*GVGVFTPTIEAR.T                  | 2 | 4.07 | 0.43 | -3.03 |
| IPI00107831 | Receptor-type tyrosine-protein phosphatase F precursor | R.TATM*LCAAGGNPDPEISWFKDFLPVDPATSNR.I | 3 | 4.82 | 0.52 | -3.38 |
| IPI00107831 | Receptor-type tyrosine-protein phosphatase F precursor | R.TATM*LCAAGGNPDPEISWFKDFLPVDPATSNR.I | 4 | 3.24 | 0.26 | -2.71 |
| IPI00107831 | Receptor-type tyrosine-protein phosphatase F precursor | R.TGEQAPSSPPR.R                       | 2 | 2.74 | 0.23 | -2.51 |
| IPI00107831 | Receptor-type tyrosine-protein phosphatase F precursor | R.TGEQAPSSPPRR.V                      | 3 | 2.68 | 0.27 | -4.27 |
| IPI00107831 | Receptor-type tyrosine-protein phosphatase F precursor | R.TM*PVEQVFAK.N                       | 2 | 2.01 | 0.17 | -2.25 |
| IPI00107831 | Receptor-type tyrosine-protein phosphatase F precursor | R.VGGSM*LTTPR.W                       | 2 | 3.09 | 0.22 | -3.15 |
| IPI00107831 | Receptor-type tyrosine-protein phosphatase F precursor | R.VLAFTAVGDGPPSPTIQVK.T               | 3 | 4.83 | 0.50 | -4.50 |
| IPI00107831 | Receptor-type tyrosine-protein phosphatase F precursor | R.VLAVNSIGR.G                         | 1 | 1.87 | 0.07 | -1.34 |

|             |                                                                 |                                      |   |      |      |       |
|-------------|-----------------------------------------------------------------|--------------------------------------|---|------|------|-------|
| IPI00107831 | Receptor-type tyrosine-protein phosphatase F precursor          | R.VLAVNSIGR.G                        | 2 | 2.99 | 0.36 | -1.27 |
| IPI00107831 | Receptor-type tyrosine-protein phosphatase F precursor          | R.VLAVNSIGRGGPPSEAVR.A               | 3 | 3.45 | 0.38 | -2.87 |
| IPI00107831 | Receptor-type tyrosine-protein phosphatase F precursor          | R.VYYTPDSR.R                         | 2 | 2.18 | 0.31 | -3.29 |
| IPI00107831 | Receptor-type tyrosine-protein phosphatase F precursor          | R.WFYIVVVPIDR.V                      | 2 | 3.76 | 0.45 | -3.33 |
| IPI00107831 | Receptor-type tyrosine-protein phosphatase F precursor          | R.YSAPANLYVR.E                       | 1 | 1.79 | 0.17 | -2.65 |
| IPI00107831 | Receptor-type tyrosine-protein phosphatase F precursor          | R.YSAPANLYVR.E                       | 2 | 2.87 | 0.33 | -2.22 |
| IPI00107831 | Receptor-type tyrosine-protein phosphatase F precursor          | R.YSIGGLSPFSEYAFR.V                  | 2 | 4.41 | 0.51 | -4.96 |
| IPI00107831 | Receptor-type tyrosine-protein phosphatase F precursor          | S.GALQIESSEESDQGYECVATNSAGTR.Y       | 3 | 6.82 | 0.64 | -2.52 |
| IPI00107886 | Semaphorin 6B isoform 2                                         | G.LFPEEPPPLSVAPR.D                   | 2 | 3.02 | 0.33 | -3.29 |
| IPI00107886 | Semaphorin 6B isoform 2                                         | R.DYLNHYVPVFGSGPGR.L                 | 2 | 3.81 | 0.31 | -1.90 |
| IPI00107886 | Semaphorin 6B isoform 2                                         | R.DYLNHYVPVFGSGPGR.L                 | 3 | 3.01 | 0.09 | -2.53 |
| IPI00107886 | Semaphorin 6B isoform 2                                         | R.LTPAEGADDLNIQR.V                   | 2 | 4.23 | 0.38 | -2.86 |
| IPI00107886 | Semaphorin 6B isoform 2                                         | R.SNPSDINVCR.M                       | 2 | 1.97 | 0.25 | -2.58 |
| IPI00107886 | Semaphorin 6B isoform 2                                         | R.VELEPPTSTELR.Y                     | 2 | 2.59 | 0.18 | -2.87 |
| IPI00141938 | H2A histone family, member V isoform 2                          | R.AGLQFPVGR.I                        | 2 | 2.49 | 0.10 | -2.97 |
| IPI00143753 | Isoform 1 of U2-associated protein SR140                        | R.LKNPNAPMLPPP.K                     | 2 | 2.32 | 0.14 |       |
| IPI00144243 | Human immunodeficiency virus type I enhancer-binding protein 2  | K.CLELGVSM*TSVDDTETEEAENLEDLHKAAEK.H | 4 | 2.35 | 0.12 | -4.81 |
| IPI00145805 | Isoform 1 of TRAF2 and NCK-interacting protein kinase           | R.AQRLKFLCER.N                       | 2 | 2.25 | 0.06 | -0.05 |
| IPI00149044 | Isoform 2 of Suppressor of hairy wing homolog 4                 | R.ACPKCNHFNLLDPLK.N                  | 2 | 2.42 | 0.10 | -2.61 |
| IPI00149097 | Semaphorin-4A precursor                                         | K.GLQDFDTLLLSGDGNTLYVGAR.E           | 2 | 4.34 | 0.46 | -4.84 |
| IPI00149097 | Semaphorin-4A precursor                                         | R.ALSFFHQK.G                         | 2 | 1.57 | 0.16 | -3.09 |
| IPI00149375 | Isoform 2 of Uncharacterized protein C11orf56                   | R.QPLLRHGPVR.E                       | 2 | 2.22 | 0.05 | -7.29 |
| IPI00150881 | Isoform 1 of Coiled-coil domain-containing protein C6orf204     | R.M*ILEIQSM*QGKLSK.E                 | 2 | 3.33 | 0.12 |       |
| IPI00151036 | RING finger protein 13                                          | K.DQLKKLPVHKFK.K                     | 3 | 2.76 | 0.25 |       |
| IPI00151036 | RING finger protein 13                                          | K.KIDIPSVFIGESSANSLKDEFTYEK.G        | 3 | 4.73 | 0.25 |       |
| IPI00151990 | Isoform 1 of Thioredoxin domain-containing protein 15 precursor | R.FSASLAPHFNSLPR.A                   | 3 | 2.95 | 0.33 | -0.29 |
| IPI00152050 | ataxin 2-binding protein 1 isoform 3                            | R.KIEVNNATARVM*TNK.K                 | 2 | 1.13 | 0.09 | 1.70  |
| IPI00152072 | hypothetical protein LOC387758                                  | K.SISYDLGDGEESYGK.Y                  | 2 | 2.40 | 0.13 |       |
| IPI00152145 | Protein odd-skipped-related 1                                   | K.LGRGEGPGSPAGGLGALLDVTKLSPEKKPTR.G  | 3 | 3.20 | 0.12 |       |
| IPI00152182 | Isoform 1 of Kelch domain-containing protein 4                  | K.EVVAEDGTVVTK.Q                     | 2 | 3.05 | 0.24 |       |

|             |                                                              |                                       |   |      |      |       |
|-------------|--------------------------------------------------------------|---------------------------------------|---|------|------|-------|
| IPI00152216 | Isoform 1 of Protein RIC-3 precursor                         | R.SHLAEFAK.A                          | 2 | 2.13 | 0.15 | -1.65 |
| IPI00152326 | glutathione S-transferase M1 isoform 2                       | K.LGLDFPNLPYLIDGAHK.I                 | 3 | 3.23 | 0.40 | -2.11 |
| IPI00152344 | Pyridoxal phosphate phosphatase PHOSPHO2                     | Q.QGVNYTQIVYIGDGGNDVCPVTLKNDDVAM*PR.K | 3 | 3.75 | 0.17 | -8.00 |
| IPI00152418 | Decay-accelerating factor splicing variant 4                 | K.CEESFVK.I                           | 1 | 2.03 | 0.16 | -3.40 |
| IPI00152418 | Decay-accelerating factor splicing variant 4                 | K.GFTM*IGEHSIYCTVNNDEGEWSGPPPECR.G    | 3 | 7.28 | 0.55 | -2.41 |
| IPI00152418 | Decay-accelerating factor splicing variant 4                 | K.GFTM*IGEHSIYCTVNNDEGEWSGPPPECR.G    | 4 | 3.73 | 0.40 | -2.19 |
| IPI00152418 | Decay-accelerating factor splicing variant 4                 | K.LTCLQNLK.W                          | 2 | 2.67 | 0.06 | 0.33  |
| IPI00152418 | Decay-accelerating factor splicing variant 4                 | K.QPYITQNYFPVGTVVEY.E                 | 2 | 3.21 | 0.43 | 0.13  |
| IPI00152418 | Decay-accelerating factor splicing variant 4                 | K.QPYITQNYFPVGTVVEYECRPGYR.R          | 3 | 2.86 | 0.28 | -2.13 |
| IPI00152418 | Decay-accelerating factor splicing variant 4                 | K.WSTAVEFCK.K                         | 2 | 3.11 | 0.43 | -1.42 |
| IPI00152418 | Decay-accelerating factor splicing variant 4                 | R.DHYGYR.Q                            | 1 | 1.97 | 0.22 | -5.19 |
| IPI00152418 | Decay-accelerating factor splicing variant 4                 | R.DHYGYR.Q                            | 2 | 1.55 | 0.08 | -4.98 |
| IPI00152418 | Decay-accelerating factor splicing variant 4                 | R.EIYCPAPPQIDNGIIGGER.D               | 2 | 3.99 | 0.55 | -4.78 |
| IPI00152418 | Decay-accelerating factor splicing variant 4                 | R.EPSLSPK.L                           | 1 | 2.26 | 0.14 | -3.11 |
| IPI00152418 | Decay-accelerating factor splicing variant 4                 | R.LNSASLKQPYITQNYFPVGTVVEYECRPGYR.R   | 3 | 4.12 | 0.36 | -5.02 |
| IPI00152418 | Decay-accelerating factor splicing variant 4                 | R.LNSASLKQPYITQNYFPVGTVVEYECRPGYR.R   | 4 | 3.44 | 0.23 | -2.86 |
| IPI00152418 | Decay-accelerating factor splicing variant 4                 | R.QSVTYACNK.G                         | 2 | 1.95 | 0.26 | 0.49  |
| IPI00152418 | Decay-accelerating factor splicing variant 4                 | R.REPSLSPK.L                          | 2 | 2.78 | 0.20 | -3.72 |
| IPI00152418 | Decay-accelerating factor splicing variant 4                 | R.TSFPEDTVITYK.C                      | 2 | 3.08 | 0.48 | -4.46 |
| IPI00152470 | Prokineticin receptor 1                                      | K.SSADLDLKTIGMPATEEVCIR.L             | 3 | 2.85 | 0.10 | 0.81  |
| IPI00152524 | Isoform 3 of Neuropilin and tolloid-like protein 1 precursor | K.FFADGELESM*GFSAR.Y                  | 2 | 4.75 | 0.54 | -2.68 |
| IPI00152524 | Isoform 3 of Neuropilin and tolloid-like protein 1 precursor | R.DGPFGFSPIIGR.F                      | 2 | 3.11 | 0.22 | -5.28 |
| IPI00152540 | Isoform 1 of CD109 antigen precursor                         | K.ALSEFAALM*NTER.T                    | 2 | 2.77 | 0.27 | -2.70 |
| IPI00152540 | Isoform 1 of CD109 antigen precursor                         | K.FLIDTHNR.L                          | 2 | 2.60 | 0.13 | -3.36 |
| IPI00152540 | Isoform 1 of CD109 antigen precursor                         | K.IPVQLVFK.N                          | 2 | 2.51 | 0.08 | -1.90 |
| IPI00152540 | Isoform 1 of CD109 antigen precursor                         | K.LSDSWQPR.S                          | 2 | 2.31 | 0.19 | -1.34 |
| IPI00152540 | Isoform 1 of CD109 antigen precursor                         | K.SNLIQQWLSQQSDLGVISK.T               | 2 | 6.11 | 0.46 | -5.73 |
| IPI00152540 | Isoform 1 of CD109 antigen precursor                         | K.SNLIQQWLSQQSDLGVISK.T               | 3 | 4.06 | 0.46 | -2.54 |
| IPI00152540 | Isoform 1 of CD109 antigen precursor                         | K.SYSQSILLDLTDNR.L                    | 2 | 4.41 | 0.40 | -3.29 |
| IPI00152540 | Isoform 1 of CD109 antigen precursor                         | K.TLTLPSLPLNSADEIYELR.V               | 2 | 4.37 | 0.49 | -4.91 |
| IPI00152540 | Isoform 1 of CD109 antigen precursor                         | K.TLTLPSLPLNSADEIYELR.V               | 3 | 4.78 | 0.34 | -5.02 |
| IPI00152540 | Isoform 1 of CD109 antigen precursor                         | K.VSNTQDASVSIVDYEPR.R                 | 2 | 2.65 | 0.31 | 1.63  |
| IPI00152540 | Isoform 1 of CD109 antigen precursor                         | K.YTYGKPVK.G                          | 2 | 2.13 | 0.10 | -2.74 |
| IPI00152540 | Isoform 1 of CD109 antigen precursor                         | R.ADGNQLTLEER.R                       | 2 | 2.46 | 0.08 | -2.97 |
| IPI00152540 | Isoform 1 of CD109 antigen precursor                         | R.ISVFIQTDK.A                         | 2 | 3.04 | 0.32 | -1.73 |
| IPI00152540 | Isoform 1 of CD109 antigen precursor                         | R.KYQPNIDVQESIHFLESEFSR.G             | 3 | 4.79 | 0.43 | -3.60 |
| IPI00152540 | Isoform 1 of CD109 antigen precursor                         | R.LKELSYM*VVS.R.G                     | 2 | 2.85 | 0.27 | -3.13 |
| IPI00152540 | Isoform 1 of CD109 antigen precursor                         | R.LKELSYM*VVS.R.G                     | 3 | 2.39 | 0.09 | -3.09 |
| IPI00152540 | Isoform 1 of CD109 antigen precursor                         | R.TNIQVTVTGPSSPSPVK.F                 | 2 | 2.59 | 0.37 | -3.64 |
| IPI00152540 | Isoform 1 of CD109 antigen precursor                         | R.VIHSELQGGNK.S                       | 2 | 2.59 | 0.22 | 0.10  |



|             |                                                                                  |                                    |   |      |      |       |
|-------------|----------------------------------------------------------------------------------|------------------------------------|---|------|------|-------|
| IPI00152540 | Isoform 1 of CD109 antigen precursor                                             | R.VQITAIGDVLGPSINGLASLIR.M         | 3 | 4.77 | 0.33 | -2.69 |
| IPI00152769 | Isoform 1 of Trpc4-associated protein                                            | R.KERLPLYLRLLRMEHSK.K              | 3 | 3.43 | 0.09 |       |
| IPI00152847 | WAP, kazal, immunoglobulin, kunitz and NTR domain-containing protein 2 precursor | K.GITLAVVTCR.Y                     | 1 | 1.74 | 0.16 | -2.22 |
| IPI00152847 | WAP, kazal, immunoglobulin, kunitz and NTR domain-containing protein 2 precursor | K.GITLAVVTCR.Y                     | 2 | 3.95 | 0.40 | -2.19 |
| IPI00152847 | WAP, kazal, immunoglobulin, kunitz and NTR domain-containing protein 2 precursor | K.TCDVLKEFLGLH.-                   | 2 | 3.45 | 0.39 | -1.97 |
| IPI00152847 | WAP, kazal, immunoglobulin, kunitz and NTR domain-containing protein 2 precursor | K.TCDVLKEFLGLH.-                   | 3 | 3.20 | 0.24 | -0.50 |
| IPI00152847 | WAP, kazal, immunoglobulin, kunitz and NTR domain-containing protein 2 precursor | R.ADFPLSVVR.G                      | 2 | 3.05 | 0.28 | -4.23 |
| IPI00152847 | WAP, kazal, immunoglobulin, kunitz and NTR domain-containing protein 2 precursor | R.ALVTVDEVLKDEK.M                  | 2 | 2.91 | 0.23 | -2.92 |
| IPI00152847 | WAP, kazal, immunoglobulin, kunitz and NTR domain-containing protein 2 precursor | R.ALVTVDEVLKDEK.M                  | 3 | 2.24 | 0.21 | -1.35 |
| IPI00152847 | WAP, kazal, immunoglobulin, kunitz and NTR domain-containing protein 2 precursor | R.CYM*DAEACSK.G                    | 2 | 3.50 | 0.60 | -2.75 |
| IPI00152847 | WAP, kazal, immunoglobulin, kunitz and NTR domain-containing protein 2 precursor | R.GNVVVVFNIAQLVIYNAQLQDAGIYTCTAR.N | 3 | 5.72 | 0.53 | -4.81 |
| IPI00152847 | WAP, kazal, immunoglobulin, kunitz and NTR domain-containing protein 2 precursor | R.SDFVILGR.V                       | 2 | 2.71 | 0.29 | -2.75 |
| IPI00152847 | WAP, kazal, immunoglobulin, kunitz and NTR domain-containing protein 2 precursor | R.VSELTEEPDSGR.A                   | 2 | 3.94 | 0.34 | -3.52 |
| IPI00152849 | Isoform 1 of G2/mitotic-specific cyclin-B3                                       | K.RKHATQGTM*SHLKKPLILQTTSGEK.S     | 4 | 2.63 | 0.14 | -5.82 |
| IPI00152850 | junctional adhesion molecule 3 precursor                                         | K.IQDEQTTYVFFDNK.I                 | 2 | 4.44 | 0.37 | -3.12 |
| IPI00152850 | junctional adhesion molecule 3 precursor                                         | R.DSALYR.C                         | 1 | 1.63 | 0.16 | -4.17 |
| IPI00152850 | junctional adhesion molecule 3 precursor                                         | R.NDVPLPTDSR.A                     | 2 | 2.02 | 0.10 | -2.50 |
| IPI00152850 | junctional adhesion molecule 3 precursor                                         | R.RDSALYR.C                        | 2 | 2.38 | 0.14 | -4.84 |
| IPI00153049 | Isoform 2 of Matrix-remodeling-associated protein 8 precursor                    | R.AYGPLFLR.D                       | 2 | 1.78 | 0.09 | -1.46 |
| IPI00153049 | Isoform 2 of Matrix-remodeling-associated protein 8 precursor                    | R.GAPALLTCVNR.G                    | 2 | 2.87 | 0.12 | -1.94 |
| IPI00153049 | Isoform 2 of Matrix-remodeling-associated protein 8 precursor                    | R.LLDLYSAGEQR.V                    | 2 | 3.85 | 0.41 | -4.87 |
| IPI00153049 | Isoform 2 of Matrix-remodeling-associated protein 8 precursor                    | R.VAVGADAFER.G                     | 2 | 2.77 | 0.27 | -3.95 |
| IPI00154528 | Isoform 1 of Structural maintenance of chromosomes protein 6                     | K.FFMKATQLEQM*KEDYSYIMETK.E        | 3 | 2.36 | 0.08 | 0.38  |
| IPI00154734 | seizure related 6 homolog isoform 1                                              | K.EGPWSPESSESPM*LR.I               | 2 | 1.97 | 0.11 | -3.47 |
| IPI00154734 | seizure related 6 homolog isoform 1                                              | K.HFFVELSTDSSGAAAGM*ALR.Y          | 2 | 4.92 | 0.44 | -6.67 |
| IPI00154734 | seizure related 6 homolog isoform 1                                              | K.HFFVELSTDSSGAAAGM*ALR.Y          | 3 | 2.64 | 0.12 | -2.65 |

|             |                                     |                                    |   |      |      |       |
|-------------|-------------------------------------|------------------------------------|---|------|------|-------|
| IPI00154734 | seizure related 6 homolog isoform 1 | K.LLNHHPLLEE.F                     | 1 | 2.53 | 0.16 | -1.99 |
| IPI00154734 | seizure related 6 homolog isoform 1 | K.LLNHHPLLEEFQEGLEK.G              | 3 | 6.16 | 0.51 | -2.95 |
| IPI00154734 | seizure related 6 homolog isoform 1 | K.LLNHHPLLEEFQEGLEK.G              | 4 | 3.62 | 0.19 | -0.61 |
| IPI00154734 | seizure related 6 homolog isoform 1 | K.VSLAEDDDR.L                      | 2 | 3.17 | 0.32 | -3.34 |
| IPI00154734 | seizure related 6 homolog isoform 1 | K.VSLAEDDDRLIIR.N                  | 2 | 3.35 | 0.24 | -2.15 |
| IPI00154734 | seizure related 6 homolog isoform 1 | K.VSLAEDDDRLIIR.N                  | 3 | 2.76 | 0.30 | -1.74 |
| IPI00154734 | seizure related 6 homolog isoform 1 | L.SLEAPTVGK.G                      | 1 | 1.93 | 0.18 | -2.19 |
| IPI00154734 | seizure related 6 homolog isoform 1 | R.AASLDGFYNS.R                     | 1 | 2.20 | 0.29 | -4.01 |
| IPI00154734 | seizure related 6 homolog isoform 1 | R.AASLDGFYNSR.S                    | 1 | 2.01 | 0.33 | -3.72 |
| IPI00154734 | seizure related 6 homolog isoform 1 | R.AASLDGFYNSR.S                    | 2 | 3.63 | 0.40 | -4.80 |
| IPI00154734 | seizure related 6 homolog isoform 1 | R.QQDCIWGVHVEEDKR.I                | 4 | 2.58 | 0.17 | -2.79 |
| IPI00154734 | seizure related 6 homolog isoform 1 | R.IGPGDVLTFYDGGDLTAR.V             | 2 | 5.82 | 0.61 | -5.42 |
| IPI00154734 | seizure related 6 homolog isoform 1 | R.IGPGDVLTFYDGGDLTAR.V             | 3 | 4.93 | 0.46 | -4.05 |
| IPI00154734 | seizure related 6 homolog isoform 1 | R.NGDNVEAPPVYDSYEVEYLPIEGLLSSGK.H  | 2 | 4.02 | 0.54 | -4.23 |
| IPI00154734 | seizure related 6 homolog isoform 1 | R.NGDNVEAPPVYDSYEVEYLPIEGLLSSGK.H  | 3 | 6.00 | 0.45 | -4.55 |
| IPI00154734 | seizure related 6 homolog isoform 1 | R.RLISSPK.F                        | 1 | 1.76 | 0.15 | -4.10 |
| IPI00154734 | seizure related 6 homolog isoform 1 | R.RPAYGDVTVTSLHPGGSAR.F            | 2 | 3.61 | 0.40 | -4.57 |
| IPI00154734 | seizure related 6 homolog isoform 1 | R.RPAYGDVTVTSLHPGGSAR.F            | 3 | 4.78 | 0.43 | -3.74 |
| IPI00154734 | seizure related 6 homolog isoform 1 | R.VLGQYSGPR.S                      | 1 | 2.15 | 0.15 | -0.94 |
| IPI00154734 | seizure related 6 homolog isoform 1 | R.VLGQYSGPR.S                      | 2 | 2.70 | 0.33 | -2.47 |
| IPI00154734 | seizure related 6 homolog isoform 1 | R.YEAFQQGHICYEPVK.Y                | 2 | 4.35 | 0.45 | -4.11 |
| IPI00154742 | IGL@ protein                        | K.AAPSVTLFPPSSEELQANK.A            | 1 | 4.04 | 0.50 |       |
| IPI00154742 | IGL@ protein                        | K.AAPSVTLFPPSSEELQANK.A            | 2 | 3.15 | 0.34 | -1.50 |
| IPI00154742 | IGL@ protein                        | K.AAPSVTLFPPSSEELQANK.A            | 3 | 3.32 | 0.13 |       |
| IPI00154742 | IGL@ protein                        | K.ADSSPVKAGVETTTPSK.Q              | 1 | 3.85 | 0.37 |       |
| IPI00154742 | IGL@ protein                        | K.ADSSPVKAGVETTTPSK.Q              | 2 | 3.50 | 0.38 |       |
| IPI00154742 | IGL@ protein                        | K.ADSSPVKAGVETTTPSK.Q              | 3 | 3.46 | 0.35 |       |
| IPI00154742 | IGL@ protein                        | K.ADSSPVKAGVETTTPSKQSNNK.Y         | 2 | 5.35 | 0.42 |       |
| IPI00154742 | IGL@ protein                        | K.ADSSPVKAGVETTTPSKQSNNK.Y         | 3 | 4.61 | 0.23 |       |
| IPI00154742 | IGL@ protein                        | K.AGVETTTPSK.Q                     | 2 | 2.62 | 0.09 | -3.23 |
| IPI00154742 | IGL@ protein                        | K.AGVETTTPSKQSNNK.Y                | 2 | 4.14 | 0.32 |       |
| IPI00154742 | IGL@ protein                        | K.AGVETTTPSKQSNNKYAASSYLSLTPEQWK.S | 3 | 5.47 | 0.40 |       |
| IPI00154742 | IGL@ protein                        | K.ATLVCLISDFYPGAVTVAWK.A           | 2 | 5.07 | 0.50 |       |
| IPI00154742 | IGL@ protein                        | K.ATLVCLISDFYPGAVTVAWK.A           | 3 | 3.53 | 0.31 | -3.63 |
| IPI00154742 | IGL@ protein                        | K.ATLVCLISDFYPGAVTVAWKADSSPVK.A    | 3 | 3.81 | 0.20 |       |
| IPI00154742 | IGL@ protein                        | K.QSNNKYAASSYLSLTPEQWK.S           | 2 | 5.38 | 0.37 |       |
| IPI00154742 | IGL@ protein                        | K.QSNNKYAASSYLSLTPEQWK.S           | 3 | 4.26 | 0.33 |       |
| IPI00154742 | IGL@ protein                        | K.YAASSYLSLTPEQWK.S                | 1 | 3.49 | 0.43 |       |
| IPI00154742 | IGL@ protein                        | K.YAASSYLSLTPEQWK.S                | 2 | 5.52 | 0.47 |       |
| IPI00154742 | IGL@ protein                        | K.YAASSYLSLTPEQWK.S                | 3 | 3.44 | 0.22 |       |
| IPI00154742 | IGL@ protein                        | R.FSGNSGNTATLTISR.V                | 1 | 3.22 | 0.40 |       |
| IPI00154742 | IGL@ protein                        | R.FSGNSGNTATLTISR.V                | 2 | 4.32 | 0.38 |       |

|             |                                                                                         |                                    |   |      |      |       |
|-------------|-----------------------------------------------------------------------------------------|------------------------------------|---|------|------|-------|
| IPI00154742 | IGL@ protein                                                                            | R.ITCGGNNIGSK.S                    | 2 | 2.81 | 0.18 |       |
| IPI00154742 | IGL@ protein                                                                            | R.SYSCQVTHEGSTVEK.T                | 1 | 3.84 | 0.43 |       |
| IPI00154742 | IGL@ protein                                                                            | R.SYSCQVTHEGSTVEK.T                | 2 | 3.17 | 0.41 | -4.10 |
| IPI00154742 | IGL@ protein                                                                            | R.SYSCQVTHEGSTVEKTVAPTECS.-        | 2 | 5.35 | 0.45 |       |
| IPI00154742 | IGL@ protein                                                                            | R.SYSCQVTHEGSTVEKTVAPTECS.-        | 3 | 2.78 | 0.26 |       |
| IPI00154858 | Platelet endothelial aggregation receptor 1 precursor                                   | R.FGQDCAETCDCAPDAR.C               | 1 | 2.14 | 0.05 |       |
| IPI00155447 | MMP28 protein                                                                           | K.YGYLNEQVPK.A                     | 2 | 1.98 | 0.16 | -2.82 |
| IPI00155729 | Plexin-B3 precursor                                                                     | K.LGQPVSVAALQADGHM*IAFLGDTQQQLYK.V | 3 | 4.87 | 0.49 | -2.49 |
| IPI00155729 | Plexin-B3 precursor                                                                     | R.ELPVIYVTQGEAQR.L                 | 2 | 3.55 | 0.39 | -2.43 |
| IPI00155729 | Plexin-B3 precursor                                                                     | R.QEQGQVTLSPR.L                    | 2 | 2.76 | 0.20 | -1.87 |
| IPI00155729 | Plexin-B3 precursor                                                                     | R.QLAGSQPFSSEGLGR.L                | 2 | 3.86 | 0.48 | -2.99 |
| IPI00155729 | Plexin-B3 precursor                                                                     | R.TLLASPFR.Y                       | 2 | 2.09 | 0.16 | -0.96 |
| IPI00155729 | Plexin-B3 precursor                                                                     | R.TRPQAAPGEAAVLVVFHGAQR.T          | 3 | 6.13 | 0.53 | -4.72 |
| IPI00155729 | Plexin-B3 precursor                                                                     | R.TRPQAAPGEAAVLVVFHGAQR.T          | 4 | 2.82 | 0.27 | -2.88 |
| IPI00156171 | Isoform 1 of Ectonucleotide pyrophosphatase/phosphodiesterase family member 2 precursor | C.PAGFVRPPLIIFSVDGFR.A             | 3 | 3.90 | 0.36 | -4.42 |
| IPI00156171 | Isoform 1 of Ectonucleotide pyrophosphatase/phosphodiesterase family member 2 precursor | F.DYDYDGLHDTEDKIK.Q                | 2 | 3.46 | 0.44 | -1.88 |
| IPI00156171 | Isoform 1 of Ectonucleotide pyrophosphatase/phosphodiesterase family member 2 precursor | F.LSNYLTNVDDITLVPGLGR.I            | 2 | 3.89 | 0.48 | -2.95 |
| IPI00156171 | Isoform 1 of Ectonucleotide pyrophosphatase/phosphodiesterase family member 2 precursor | I.DKIVGQLM*DGLK.Q                  | 2 | 2.98 | 0.32 | -1.95 |
| IPI00156171 | Isoform 1 of Ectonucleotide pyrophosphatase/phosphodiesterase family member 2 precursor | I.FDYDYDGLHDTEDKIK.Q               | 2 | 3.44 | 0.37 | -5.92 |
| IPI00156171 | Isoform 1 of Ectonucleotide pyrophosphatase/phosphodiesterase family member 2 precursor | K.AAECAPAGFVRPPLIIFSVDGFR.A        | 2 | 3.41 | 0.48 | -3.20 |
| IPI00156171 | Isoform 1 of Ectonucleotide pyrophosphatase/phosphodiesterase family member 2 precursor | K.AAECAPAGFVRPPLIIFSVDGFR.A        | 3 | 5.07 | 0.54 | -6.71 |
| IPI00156171 | Isoform 1 of Ectonucleotide pyrophosphatase/phosphodiesterase family member 2 precursor | K.AGTFFWSVVIPHER.R                 | 2 | 3.88 | 0.50 | -4.30 |
| IPI00156171 | Isoform 1 of Ectonucleotide pyrophosphatase/phosphodiesterase family member 2 precursor | K.AGTFFWSVVIPHER.R                 | 3 | 3.64 | 0.38 | -3.43 |

|             |                                                                                         |                                   |   |      |      |       |
|-------------|-----------------------------------------------------------------------------------------|-----------------------------------|---|------|------|-------|
| IPI00156171 | Isoform 1 of Ectonucleotide pyrophosphatase/phosphodiesterase family member 2 precursor | K.AGTFFWSVVIPHERR.I               | 3 | 2.36 | 0.24 | -5.42 |
| IPI00156171 | Isoform 1 of Ectonucleotide pyrophosphatase/phosphodiesterase family member 2 precursor | K.CFFQGDHGFNDK.V                  | 2 | 3.96 | 0.46 | -2.89 |
| IPI00156171 | Isoform 1 of Ectonucleotide pyrophosphatase/phosphodiesterase family member 2 precursor | K.CFFQGDHGFNDK/NSM*QTVFVGYGPTFK.Y | 3 | 3.99 | 0.37 | -3.45 |
| IPI00156171 | Isoform 1 of Ectonucleotide pyrophosphatase/phosphodiesterase family member 2 precursor | K.CFFQGDHGFNDK/NSM*QTVFVGYGPTFK.Y | 4 | 3.01 | 0.15 | -4.96 |
| IPI00156171 | Isoform 1 of Ectonucleotide pyrophosphatase/phosphodiesterase family member 2 precursor | K.IVGQLM*DGLK.Q                   | 1 | 1.92 | 0.16 | -4.37 |
| IPI00156171 | Isoform 1 of Ectonucleotide pyrophosphatase/phosphodiesterase family member 2 precursor | K.IVGQLM*DGLK.Q                   | 2 | 3.43 | 0.36 | -3.09 |
| IPI00156171 | Isoform 1 of Ectonucleotide pyrophosphatase/phosphodiesterase family member 2 precursor | K.KPDQHFKPYLK.Q                   | 2 | 3.78 | 0.19 | -4.92 |
| IPI00156171 | Isoform 1 of Ectonucleotide pyrophosphatase/phosphodiesterase family member 2 precursor | K.KPDQHFKPYLK.Q                   | 3 | 2.76 | 0.20 | -4.13 |
| IPI00156171 | Isoform 1 of Ectonucleotide pyrophosphatase/phosphodiesterase family member 2 precursor | K.NDKQM*SYGFLFPPYLSSSPEAK.Y       | 2 | 5.27 | 0.57 | -4.39 |
| IPI00156171 | Isoform 1 of Ectonucleotide pyrophosphatase/phosphodiesterase family member 2 precursor | K.NDKQM*SYGFLFPPYLSSSPEAK.Y       | 3 | 4.41 | 0.46 | -3.41 |
| IPI00156171 | Isoform 1 of Ectonucleotide pyrophosphatase/phosphodiesterase family member 2 precursor | K.NKLDELNKR.L                     | 2 | 2.97 | 0.13 | -3.10 |
| IPI00156171 | Isoform 1 of Ectonucleotide pyrophosphatase/phosphodiesterase family member 2 precursor | K.QAEVSSVPDHLTSCVRPDVR.V          | 2 | 2.45 | 0.18 | -3.52 |
| IPI00156171 | Isoform 1 of Ectonucleotide pyrophosphatase/phosphodiesterase family member 2 precursor | K.QGVKAGTFWVSVIPHER.R             | 4 | 3.38 | 0.24 | -2.10 |
| IPI00156171 | Isoform 1 of Ectonucleotide pyrophosphatase/phosphodiesterase family member 2 precursor | K.QM*SYGFLFPPYLSSSPEAK.Y          | 2 | 4.95 | 0.54 | -4.82 |

|             |                                                                                         |                                          |   |      |      |       |
|-------------|-----------------------------------------------------------------------------------------|------------------------------------------|---|------|------|-------|
| IPI00156171 | Isoform 1 of Ectonucleotide pyrophosphatase/phosphodiesterase family member 2 precursor | K.QM*SYGFLFPPYLSSSPEAK.Y                 | 3 | 3.71 | 0.15 | -4.41 |
| IPI00156171 | Isoform 1 of Ectonucleotide pyrophosphatase/phosphodiesterase family member 2 precursor | K.QYVEGSSIPVPTHYYSIITSCLDFTQPADK.C       | 3 | 4.55 | 0.42 | -4.45 |
| IPI00156171 | Isoform 1 of Ectonucleotide pyrophosphatase/phosphodiesterase family member 2 precursor | K.SYTSCCHDFDELCLK.T                      | 2 | 4.55 | 0.46 | -0.09 |
| IPI00156171 | Isoform 1 of Ectonucleotide pyrophosphatase/phosphodiesterase family member 2 precursor | K.SYTSCCHDFDELCLK.T                      | 3 | 2.16 | 0.22 | -1.69 |
| IPI00156171 | Isoform 1 of Ectonucleotide pyrophosphatase/phosphodiesterase family member 2 precursor | K.TFPNLYTLATGLYPESH.G                    | 2 | 3.51 | 0.35 | -3.72 |
| IPI00156171 | Isoform 1 of Ectonucleotide pyrophosphatase/phosphodiesterase family member 2 precursor | K.TFPNLYTLATGLYPESHGIVGN.S               | 2 | 4.19 | 0.52 | -5.02 |
| IPI00156171 | Isoform 1 of Ectonucleotide pyrophosphatase/phosphodiesterase family member 2 precursor | K.TFPNLYTLATGLYPESHGIVGNM*YDPVDFATFHLR.G | 3 | 5.63 | 0.50 | -3.56 |
| IPI00156171 | Isoform 1 of Ectonucleotide pyrophosphatase/phosphodiesterase family member 2 precursor | K.TFPNLYTLATGLYPESHGIVGNM*YDPVDFATFHLR.G | 4 | 2.73 | 0.42 | -4.05 |
| IPI00156171 | Isoform 1 of Ectonucleotide pyrophosphatase/phosphodiesterase family member 2 precursor | K.TYLHTYESEI.-                           | 1 | 2.74 | 0.38 | -4.10 |
| IPI00156171 | Isoform 1 of Ectonucleotide pyrophosphatase/phosphodiesterase family member 2 precursor | K.TYLHTYESEI.-                           | 2 | 3.08 | 0.36 | -2.57 |
| IPI00156171 | Isoform 1 of Ectonucleotide pyrophosphatase/phosphodiesterase family member 2 precursor | K.VNSM*QTVFVGYPGPTFK.Y                   | 2 | 4.57 | 0.51 | -4.65 |
| IPI00156171 | Isoform 1 of Ectonucleotide pyrophosphatase/phosphodiesterase family member 2 precursor | K.YDAFLVTNM*VPM*YPA.F                    | 2 | 4.18 | 0.44 | -1.28 |
| IPI00156171 | Isoform 1 of Ectonucleotide pyrophosphatase/phosphodiesterase family member 2 precursor | K.YDAFLVTNM*VPM*YPAF.K                   | 2 | 4.11 | 0.56 | -3.03 |
| IPI00156171 | Isoform 1 of Ectonucleotide pyrophosphatase/phosphodiesterase family member 2 precursor | K.YDAFLVTNM*VPM*YPAFK.R                  | 2 | 5.18 | 0.54 | -5.59 |

|             |                                                                                         |                                    |   |      |      |       |
|-------------|-----------------------------------------------------------------------------------------|------------------------------------|---|------|------|-------|
| IPI00156171 | Isoform 1 of Ectonucleotide pyrophosphatase/phosphodiesterase family member 2 precursor | K.YDAFLVTNM*VPM*YPAFK.R            | 3 | 3.31 | 0.34 | -3.66 |
| IPI00156171 | Isoform 1 of Ectonucleotide pyrophosphatase/phosphodiesterase family member 2 precursor | K.YDAFLVTNM*VPM*YPAFKR.V           | 2 | 3.55 | 0.49 | -4.73 |
| IPI00156171 | Isoform 1 of Ectonucleotide pyrophosphatase/phosphodiesterase family member 2 precursor | K.YDAFLVTNM*VPM*YPAFKR.V           | 3 | 5.03 | 0.51 | -4.07 |
| IPI00156171 | Isoform 1 of Ectonucleotide pyrophosphatase/phosphodiesterase family member 2 precursor | K.YGPFPGPEM*TNPLR.E                | 2 | 3.34 | 0.40 | -3.44 |
| IPI00156171 | Isoform 1 of Ectonucleotide pyrophosphatase/phosphodiesterase family member 2 precursor | K.YGPFPGPEM*TNPLREIDK.I            | 2 | 3.20 | 0.23 | -3.41 |
| IPI00156171 | Isoform 1 of Ectonucleotide pyrophosphatase/phosphodiesterase family member 2 precursor | K.YGPFPGPEM*TNPLREIDK.I            | 3 | 1.80 | 0.16 | -1.64 |
| IPI00156171 | Isoform 1 of Ectonucleotide pyrophosphatase/phosphodiesterase family member 2 precursor | K.YGPFPGPEM*TNPLREIDKIVGQLM*DGLK.Q | 3 | 4.89 | 0.35 | -4.93 |
| IPI00156171 | Isoform 1 of Ectonucleotide pyrophosphatase/phosphodiesterase family member 2 precursor | K.YGPFPGPEM*TNPLREIDKIVGQLM*DGLK.Q | 4 | 2.75 | 0.25 | -4.03 |
| IPI00156171 | Isoform 1 of Ectonucleotide pyrophosphatase/phosphodiesterase family member 2 precursor | M.SYGFLFPPYLSSSPEAK.Y              | 2 | 3.49 | 0.41 | -5.28 |
| IPI00156171 | Isoform 1 of Ectonucleotide pyrophosphatase/phosphodiesterase family member 2 precursor | R.CFELQEAGPPDCR.C                  | 2 | 5.22 | 0.56 | -3.33 |
| IPI00156171 | Isoform 1 of Ectonucleotide pyrophosphatase/phosphodiesterase family member 2 precursor | R.CVNVIFVGDHGM*EDVTCDR.T           | 2 | 5.49 | 0.58 | -2.79 |
| IPI00156171 | Isoform 1 of Ectonucleotide pyrophosphatase/phosphodiesterase family member 2 precursor | R.CVNVIFVGDHGM*EDVTCDR.T           | 3 | 3.67 | 0.34 | -3.25 |
| IPI00156171 | Isoform 1 of Ectonucleotide pyrophosphatase/phosphodiesterase family member 2 precursor | R.DIEHLTSLDFFR.K                   | 1 | 3.49 | 0.53 | -2.14 |
| IPI00156171 | Isoform 1 of Ectonucleotide pyrophosphatase/phosphodiesterase family member 2 precursor | R.DIEHLTSLDFFR.K                   | 2 | 4.04 | 0.46 | -5.32 |

|             |                                                                                         |                       |   |      |      |       |
|-------------|-----------------------------------------------------------------------------------------|-----------------------|---|------|------|-------|
| IPI00156171 | Isoform 1 of Ectonucleotide pyrophosphatase/phosphodiesterase family member 2 precursor | R.DIEHLTSLDFFR.K      | 3 | 4.67 | 0.29 | -1.15 |
| IPI00156171 | Isoform 1 of Ectonucleotide pyrophosphatase/phosphodiesterase family member 2 precursor | R.DIEHLTSLDFFR.T      | 2 | 3.78 | 0.40 | -3.88 |
| IPI00156171 | Isoform 1 of Ectonucleotide pyrophosphatase/phosphodiesterase family member 2 precursor | R.DIEHLTSLDFFR.T      | 3 | 3.52 | 0.40 | -1.84 |
| IPI00156171 | Isoform 1 of Ectonucleotide pyrophosphatase/phosphodiesterase family member 2 precursor | R.DIEHLTSLDFFR.T      | 4 | 2.09 | 0.27 | -3.04 |
| IPI00156171 | Isoform 1 of Ectonucleotide pyrophosphatase/phosphodiesterase family member 2 precursor | R.EIDKIVGQLM*DGLK.Q   | 2 | 4.20 | 0.41 | -3.54 |
| IPI00156171 | Isoform 1 of Ectonucleotide pyrophosphatase/phosphodiesterase family member 2 precursor | R.EIDKIVGQLM*DGLK.Q   | 3 | 2.93 | 0.31 | -2.19 |
| IPI00156171 | Isoform 1 of Ectonucleotide pyrophosphatase/phosphodiesterase family member 2 precursor | R.EIDKIVGQLM*DGLKQL.L | 3 | 2.65 | 0.17 | -3.22 |
| IPI00156171 | Isoform 1 of Ectonucleotide pyrophosphatase/phosphodiesterase family member 2 precursor | R.GDCCTNYQVVCK.G      | 2 | 3.61 | 0.41 | -2.75 |
| IPI00156171 | Isoform 1 of Ectonucleotide pyrophosphatase/phosphodiesterase family member 2 precursor | R.IEDIHLLVER.R        | 1 | 2.56 | 0.26 | -2.97 |
| IPI00156171 | Isoform 1 of Ectonucleotide pyrophosphatase/phosphodiesterase family member 2 precursor | R.IEDIHLLVER.R        | 2 | 3.91 | 0.27 | -1.16 |
| IPI00156171 | Isoform 1 of Ectonucleotide pyrophosphatase/phosphodiesterase family member 2 precursor | R.IEDIHLLVER.R        | 3 | 3.76 | 0.32 | -2.93 |
| IPI00156171 | Isoform 1 of Ectonucleotide pyrophosphatase/phosphodiesterase family member 2 precursor | R.KPLDVYK.K           | 1 | 2.48 | 0.15 | -2.51 |
| IPI00156171 | Isoform 1 of Ectonucleotide pyrophosphatase/phosphodiesterase family member 2 precursor | R.KPLDVYK.K           | 2 | 2.76 | 0.11 | -2.47 |
| IPI00156171 | Isoform 1 of Ectonucleotide pyrophosphatase/phosphodiesterase family member 2 precursor | R.KPLDVYKKPSGK.C      | 2 | 3.36 | 0.41 | -3.88 |

|             |                                                                                         |                                                |   |      |      |       |
|-------------|-----------------------------------------------------------------------------------------|------------------------------------------------|---|------|------|-------|
| IPI00156171 | Isoform 1 of Ectonucleotide pyrophosphatase/phosphodiesterase family member 2 precursor | R.NGVNVISGPIFDYDYDGLHDTEDK.I                   | 2 | 5.15 | 0.56 | -3.76 |
| IPI00156171 | Isoform 1 of Ectonucleotide pyrophosphatase/phosphodiesterase family member 2 precursor | R.NGVNVISGPIFDYDYDGLHDTEDK.I                   | 3 | 3.48 | 0.25 | -5.19 |
| IPI00156171 | Isoform 1 of Ectonucleotide pyrophosphatase/phosphodiesterase family member 2 precursor | R.NGVNVISGPIFDYDYDGLHDTEDKIK.Q                 | 2 | 4.95 | 0.52 | -6.73 |
| IPI00156171 | Isoform 1 of Ectonucleotide pyrophosphatase/phosphodiesterase family member 2 precursor | R.NGVNVISGPIFDYDYDGLHDTEDKIK.Q                 | 3 | 4.82 | 0.49 | -4.02 |
| IPI00156171 | Isoform 1 of Ectonucleotide pyrophosphatase/phosphodiesterase family member 2 precursor | R.NGVNVISGPIFDYDYDGLHDTEDKIK.Q                 | 4 | 4.22 | 0.33 | -4.38 |
| IPI00156171 | Isoform 1 of Ectonucleotide pyrophosphatase/phosphodiesterase family member 2 precursor | R.RIEDIHLVER.R                                 | 1 | 2.06 | 0.22 | -3.60 |
| IPI00156171 | Isoform 1 of Ectonucleotide pyrophosphatase/phosphodiesterase family member 2 precursor | R.RIEDIHLVER.R                                 | 2 | 3.83 | 0.34 | -4.33 |
| IPI00156171 | Isoform 1 of Ectonucleotide pyrophosphatase/phosphodiesterase family member 2 precursor | R.RIEDIHLVER.R                                 | 3 | 2.87 | 0.25 | -2.87 |
| IPI00156171 | Isoform 1 of Ectonucleotide pyrophosphatase/phosphodiesterase family member 2 precursor | R.RIEDIHLVERR.W                                | 2 | 2.64 | 0.25 | -4.85 |
| IPI00156171 | Isoform 1 of Ectonucleotide pyrophosphatase/phosphodiesterase family member 2 precursor | R.SYPEILTK.T                                   | 2 | 2.48 | 0.10 | -2.75 |
| IPI00156171 | Isoform 1 of Ectonucleotide pyrophosphatase/phosphodiesterase family member 2 precursor | R.TEFLSNYLTVDDITLVPGTLGR.I                     | 2 | 4.76 | 0.50 | -5.12 |
| IPI00156171 | Isoform 1 of Ectonucleotide pyrophosphatase/phosphodiesterase family member 2 precursor | R.TEFLSNYLTVDDITLVPGTLGR.I                     | 3 | 4.27 | 0.42 | -3.30 |
| IPI00156171 | Isoform 1 of Ectonucleotide pyrophosphatase/phosphodiesterase family member 2 precursor | R.TEFLSNYLTVDDITLVPGTLGR.I                     | 4 | 3.41 | 0.24 | -4.35 |
| IPI00156171 | Isoform 1 of Ectonucleotide pyrophosphatase/phosphodiesterase family member 2 precursor | R.TNTFRPTM*PEEVTRPNYPGIM*YMQSDFDLGCTCDDKVEPK.N | 4 | 3.52 | 0.18 | -3.53 |



|             |                                                                                         |                                               |   |      |      |       |
|-------------|-----------------------------------------------------------------------------------------|-----------------------------------------------|---|------|------|-------|
| IPI00156171 | Isoform 1 of Ectonucleotide pyrophosphatase/phosphodiesterase family member 2 precursor | R.TNTRPTM*PEEVTRPNYPGIM*YLRQDFDLGCTCDDKVEPK.N | 5 | 4.96 | 0.39 | -0.26 |
| IPI00156171 | Isoform 1 of Ectonucleotide pyrophosphatase/phosphodiesterase family member 2 precursor | R.VRDIEHLTSLDFFR.K                            | 2 | 4.23 | 0.45 | -5.60 |
| IPI00156171 | Isoform 1 of Ectonucleotide pyrophosphatase/phosphodiesterase family member 2 precursor | R.VRDIEHLTSLDFFR.K                            | 3 | 3.93 | 0.47 | -5.61 |
| IPI00156171 | Isoform 1 of Ectonucleotide pyrophosphatase/phosphodiesterase family member 2 precursor | R.VRDIEHLTSLDFFR.K                            | 4 | 3.05 | 0.18 | -4.53 |
| IPI00156171 | Isoform 1 of Ectonucleotide pyrophosphatase/phosphodiesterase family member 2 precursor | R.VRDIEHLTSLDFFR.K.T                          | 2 | 2.77 | 0.32 | -5.23 |
| IPI00156171 | Isoform 1 of Ectonucleotide pyrophosphatase/phosphodiesterase family member 2 precursor | R.VRDIEHLTSLDFFR.K.T                          | 3 | 4.98 | 0.47 | -4.38 |
| IPI00156171 | Isoform 1 of Ectonucleotide pyrophosphatase/phosphodiesterase family member 2 precursor | R.VRDIEHLTSLDFFR.K.T                          | 4 | 4.25 | 0.44 | -5.05 |
| IPI00156171 | Isoform 1 of Ectonucleotide pyrophosphatase/phosphodiesterase family member 2 precursor | R.VSPSFSQNCLAYK.N                             | 1 | 1.90 | 0.33 | 1.67  |
| IPI00156171 | Isoform 1 of Ectonucleotide pyrophosphatase/phosphodiesterase family member 2 precursor | R.VSPSFSQNCLAYK.N                             | 2 | 4.15 | 0.47 | -2.45 |
| IPI00156171 | Isoform 1 of Ectonucleotide pyrophosphatase/phosphodiesterase family member 2 precursor | R.VSPSFSQNCLAYKNDK.Q                          | 2 | 4.72 | 0.41 | -4.90 |
| IPI00156171 | Isoform 1 of Ectonucleotide pyrophosphatase/phosphodiesterase family member 2 precursor | R.VWNYFQR.V                                   | 1 | 2.16 | 0.18 | -1.43 |
| IPI00156171 | Isoform 1 of Ectonucleotide pyrophosphatase/phosphodiesterase family member 2 precursor | R.VWNYFQR.V                                   | 2 | 2.26 | 0.08 | -0.39 |
| IPI00156171 | Isoform 1 of Ectonucleotide pyrophosphatase/phosphodiesterase family member 2 precursor | R.WWGGQPLWITATK.Q                             | 1 | 2.38 | 0.42 | -2.22 |
| IPI00156171 | Isoform 1 of Ectonucleotide pyrophosphatase/phosphodiesterase family member 2 precursor | R.WWGGQPLWITATK.Q                             | 2 | 4.32 | 0.46 | -3.60 |

|             |                                                                                         |                                 |   |      |      |       |
|-------------|-----------------------------------------------------------------------------------------|---------------------------------|---|------|------|-------|
| IPI00156171 | Isoform 1 of Ectonucleotide pyrophosphatase/phosphodiesterase family member 2 precursor | R.WWGGQPLWITATK.Q               | 3 | 2.44 | 0.11 | -1.72 |
| IPI00156171 | Isoform 1 of Ectonucleotide pyrophosphatase/phosphodiesterase family member 2 precursor | V.RDIEHLTSLDFFR.K               | 2 | 2.98 | 0.25 | -2.44 |
| IPI00156171 | Isoform 1 of Ectonucleotide pyrophosphatase/phosphodiesterase family member 2 precursor | Y.GFLFPPYLSSSPEAK.Y             | 2 | 3.22 | 0.38 | -2.53 |
| IPI00157414 | Ectonucleotide pyrophosphatase/phosphodiesterase family member 6 precursor              | K.DALKAVDTVLK.Y                 | 2 | 2.76 | 0.10 | -1.76 |
| IPI00157414 | Ectonucleotide pyrophosphatase/phosphodiesterase family member 6 precursor              | K.FVSPLTLVADEGWFITENR.E         | 2 | 4.52 | 0.50 | -4.89 |
| IPI00157414 | Ectonucleotide pyrophosphatase/phosphodiesterase family member 6 precursor              | K.FVSPLTLVADEGWFITENR.E         | 3 | 5.14 | 0.41 | -3.88 |
| IPI00157414 | Ectonucleotide pyrophosphatase/phosphodiesterase family member 6 precursor              | K.HSEIYNK.L                     | 2 | 2.42 | 0.11 | -3.31 |
| IPI00157414 | Ectonucleotide pyrophosphatase/phosphodiesterase family member 6 precursor              | K.LLVFLLDGFR.S                  | 2 | 3.78 | 0.46 | -3.63 |
| IPI00157414 | Ectonucleotide pyrophosphatase/phosphodiesterase family member 6 precursor              | K.NVPTDINFANAVSDALDSFK.S        | 2 | 6.52 | 0.62 | -3.85 |
| IPI00157414 | Ectonucleotide pyrophosphatase/phosphodiesterase family member 6 precursor              | K.YISLNDLQQVK.D                 | 2 | 3.35 | 0.31 | -3.30 |
| IPI00157414 | Ectonucleotide pyrophosphatase/phosphodiesterase family member 6 precursor              | R.ADLAAIYHER.I                  | 2 | 3.41 | 0.25 | -1.70 |
| IPI00157414 | Ectonucleotide pyrophosphatase/phosphodiesterase family member 6 precursor              | R.GIFLAFGPDFK.S                 | 2 | 3.29 | 0.36 | -3.22 |
| IPI00157414 | Ectonucleotide pyrophosphatase/phosphodiesterase family member 6 precursor              | R.GVKVDYLTPDFPSLSYPNYITLM*TGR.H | 3 | 4.98 | 0.48 | -3.43 |
| IPI00157414 | Ectonucleotide pyrophosphatase/phosphodiesterase family member 6 precursor              | R.IDVEGHHYGPASPQRK.D            | 3 | 3.25 | 0.23 | -3.72 |

|             |                                                                            |                                    |   |      |      |       |
|-------------|----------------------------------------------------------------------------|------------------------------------|---|------|------|-------|
| IPI00157414 | Ectonucleotide pyrophosphatase/phosphodiesterase family member 6 precursor | R.SDYISDEALESPLPGFK.E              | 2 | 3.77 | 0.30 | -5.41 |
| IPI00157414 | Ectonucleotide pyrophosphatase/phosphodiesterase family member 6 precursor | R.SDYISDEALESPLPGFKEIVSR.G         | 2 | 4.27 | 0.42 | -5.21 |
| IPI00157414 | Ectonucleotide pyrophosphatase/phosphodiesterase family member 6 precursor | R.SDYISDEALESPLPGFKEIVSR.G         | 3 | 3.76 | 0.48 | -5.51 |
| IPI00157454 | Isoform 1 of Heparan-sulfate 6-O-sulfotransferase 2                        | K.TGGTTFGR.H                       | 1 | 1.24 | 0.17 | -0.11 |
| IPI00157454 | Isoform 1 of Heparan-sulfate 6-O-sulfotransferase 2                        | R.ETWLFGR.F                        | 1 | 1.99 | 0.19 | -2.50 |
| IPI00157454 | Isoform 1 of Heparan-sulfate 6-O-sulfotransferase 2                        | R.KTQYLFEK.T                       | 2 | 2.11 | 0.07 | 2.51  |
| IPI00158992 | snRNA-activating protein complex subunit 4                                 | R.SGSQCLSKWKIM*M*GKKQGLRR.R        | 2 | 1.70 | 0.18 |       |
| IPI00159049 | SET-binding protein                                                        | K.ERSSYDSSMSPGMPSPHLK.V            | 2 | 2.67 | 0.22 | 2.09  |
| IPI00159927 | Neurocan core protein precursor                                            | A.M*AVTEM*LGSGQSR.S                | 2 | 3.99 | 0.46 | -2.68 |
| IPI00159927 | Neurocan core protein precursor                                            | A.VTEM*LGSGQSR.S                   | 2 | 2.91 | 0.27 | -3.06 |
| IPI00159927 | Neurocan core protein precursor                                            | G.EQGTQDITDASER.G                  | 2 | 3.64 | 0.52 | -4.05 |
| IPI00159927 | Neurocan core protein precursor                                            | K.GTVLCGPPPAVENASLIGAR.K           | 2 | 5.32 | 0.49 | -4.32 |
| IPI00159927 | Neurocan core protein precursor                                            | K.GTVLCGPPPAVENASLIGAR.K           | 3 | 5.35 | 0.43 | -1.28 |
| IPI00159927 | Neurocan core protein precursor                                            | K.LGSGSVQAALAEVALPCLFTLQPR.P       | 2 | 3.86 | 0.45 | -2.16 |
| IPI00159927 | Neurocan core protein precursor                                            | K.LGSGSVQAALAEVALPCLFTLQPR.P       | 3 | 3.90 | 0.33 | -4.24 |
| IPI00159927 | Neurocan core protein precursor                                            | K.YNVHATVR.Y                       | 1 | 2.52 | 0.22 | -4.90 |
| IPI00159927 | Neurocan core protein precursor                                            | K.YNVHATVR.Y                       | 2 | 2.33 | 0.23 | -3.46 |
| IPI00159927 | Neurocan core protein precursor                                            | Q.GTQDITDASER.G                    | 2 | 3.57 | 0.28 | -3.05 |
| IPI00159927 | Neurocan core protein precursor                                            | R.AHHPTSQHGDLTPSSGDEGEILSAEGPPVR.E | 3 | 6.10 | 0.54 | -5.19 |
| IPI00159927 | Neurocan core protein precursor                                            | R.APVLELEK.A                       | 1 | 2.05 | 0.09 | -3.18 |
| IPI00159927 | Neurocan core protein precursor                                            | R.ASDSGLYR.C                       | 1 | 1.48 | 0.23 | -2.48 |
| IPI00159927 | Neurocan core protein precursor                                            | R.ASDSGLYR.C                       | 2 | 3.13 | 0.19 | -2.56 |
| IPI00159927 | Neurocan core protein precursor                                            | R.CGGPAPGVR.T                      | 2 | 2.54 | 0.18 | -2.89 |
| IPI00159927 | Neurocan core protein precursor                                            | R.DFQWTDNTGLQFENWR.E               | 3 | 5.09 | 0.37 | -3.63 |
| IPI00159927 | Neurocan core protein precursor                                            | R.DRYALTFAEAQEACR.L                | 2 | 4.51 | 0.49 | -2.89 |
| IPI00159927 | Neurocan core protein precursor                                            | R.DRYALTFAEAQEACR.L                | 3 | 3.90 | 0.29 | 0.54  |
| IPI00159927 | Neurocan core protein precursor                                            | R.ELGGEVFYVGPARR.R                 | 1 | 2.88 | 0.48 | -3.57 |
| IPI00159927 | Neurocan core protein precursor                                            | R.ELGGEVFYVGPARR.R                 | 2 | 4.25 | 0.45 | -4.05 |
| IPI00159927 | Neurocan core protein precursor                                            | R.ELGGEVFYVGPARR.L                 | 3 | 1.80 | 0.16 | -1.44 |
| IPI00159927 | Neurocan core protein precursor                                            | R.ENQPDNFFAGGEDCVVM*VAHESGR.W      | 3 | 1.84 | 0.21 | -5.09 |
| IPI00159927 | Neurocan core protein precursor                                            | R.GIEDEQDLVPLEVTGVVFHYR.S          | 2 | 5.30 | 0.57 | -4.03 |
| IPI00159927 | Neurocan core protein precursor                                            | R.GIEDEQDLVPLEVTGVVFHYR.S          | 3 | 4.65 | 0.46 | -4.65 |
| IPI00159927 | Neurocan core protein precursor                                            | R.LSSAIIAAPR.H                     | 1 | 2.77 | 0.18 | -2.31 |

|             |                                                 |                             |   |      |      |       |
|-------------|-------------------------------------------------|-----------------------------|---|------|------|-------|
| IPI00159927 | Neurocan core protein precursor                 | R.LSSAIIAAPR.H              | 2 | 3.68 | 0.18 | -1.75 |
| IPI00159927 | Neurocan core protein precursor                 | R.NPQELYDVYCFAR.E           | 2 | 4.80 | 0.51 | -4.43 |
| IPI00159927 | Neurocan core protein precursor                 | R.NPQELYDVYCFAR.E           | 3 | 2.68 | 0.11 | -1.44 |
| IPI00159927 | Neurocan core protein precursor                 | R.QDLPILVAK.D               | 2 | 1.76 | 0.15 | -1.75 |
| IPI00159927 | Neurocan core protein precursor                 | R.QDLPILVAKDNVVR.V          | 2 | 2.06 | 0.21 | -2.55 |
| IPI00159927 | Neurocan core protein precursor                 | R.RLTLAGAR.A                | 2 | 3.35 | 0.11 | -4.82 |
| IPI00159927 | Neurocan core protein precursor                 | R.RNPQELYDVYCFAR.E          | 3 | 3.21 | 0.23 | -3.99 |
| IPI00159927 | Neurocan core protein precursor                 | R.TASGQRQDLPILVAK.D         | 3 | 2.15 | 0.12 | -1.54 |
| IPI00159927 | Neurocan core protein precursor                 | R.TGFPSPAER.F               | 1 | 2.10 | 0.11 | -2.53 |
| IPI00159927 | Neurocan core protein precursor                 | R.TGFPSPAER.F               | 2 | 2.37 | 0.15 | -2.48 |
| IPI00159927 | Neurocan core protein precursor                 | R.VSLPSYPR.R                | 1 | 1.47 | 0.11 | -3.24 |
| IPI00159927 | Neurocan core protein precursor                 | R.VSLPSYPR.R                | 2 | 2.49 | 0.23 | -2.19 |
| IPI00159927 | Neurocan core protein precursor                 | R.WNDVPCNYNLPYVCK.K         | 2 | 4.46 | 0.53 | -4.15 |
| IPI00159927 | Neurocan core protein precursor                 | R.YALTFAEAQEACR.L           | 2 | 4.49 | 0.43 | -2.88 |
| IPI00159927 | Neurocan core protein precursor                 | R.YPIQTPR.R                 | 2 | 2.02 | 0.09 | -2.89 |
| IPI00160369 | PRKCA-binding protein                           | K.VKHRLVENM*SSGTADALGLSR.A  | 3 | 3.37 | 0.17 |       |
| IPI00160552 | Isoform 1 of Tenascin-R precursor               | K.ASGPIDHYR.I               | 1 | 1.64 | 0.08 | -3.08 |
| IPI00160552 | Isoform 1 of Tenascin-R precursor               | K.EQPVVFNHVYNI.N            | 2 | 2.98 | 0.37 | -2.45 |
| IPI00160552 | Isoform 1 of Tenascin-R precursor               | K.GHEFSIPFVEM*K.M           | 2 | 3.68 | 0.46 | -3.59 |
| IPI00160552 | Isoform 1 of Tenascin-R precursor               | K.VATHLSTPQGLQFK.T          | 2 | 3.41 | 0.36 | -2.88 |
| IPI00160552 | Isoform 1 of Tenascin-R precursor               | K.VATHLSTPQGLQFK.T          | 3 | 3.35 | 0.39 | -1.74 |
| IPI00160552 | Isoform 1 of Tenascin-R precursor               | K.VDFILLK.Y                 | 2 | 3.13 | 0.11 | -3.66 |
| IPI00160552 | Isoform 1 of Tenascin-R precursor               | K.VVYSTLAGEQYHEVLVPR.G      | 2 | 4.36 | 0.48 | -2.20 |
| IPI00160552 | Isoform 1 of Tenascin-R precursor               | K.VVYSTLAGEQYHEVLVPR.G      | 3 | 4.95 | 0.54 | -1.57 |
| IPI00160552 | Isoform 1 of Tenascin-R precursor               | R.AKVDFILLK.Y               | 2 | 2.56 | 0.20 | -1.41 |
| IPI00160552 | Isoform 1 of Tenascin-R precursor               | R.DGQEAASFASYDR.F           | 2 | 4.09 | 0.52 | -2.83 |
| IPI00160552 | Isoform 1 of Tenascin-R precursor               | R.GRQQSLESTVDAFTGFRPISHL.H  | 3 | 4.10 | 0.37 | -1.32 |
| IPI00160552 | Isoform 1 of Tenascin-R precursor               | R.ITFTPSSGIASEVTVPK.D       | 2 | 4.16 | 0.38 | -2.42 |
| IPI00160552 | Isoform 1 of Tenascin-R precursor               | R.LDSSVVPNTVTEFTITR.L       | 2 | 3.95 | 0.42 | -4.66 |
| IPI00160552 | Isoform 1 of Tenascin-R precursor               | R.LNPATEYEISLNSVR.G         | 2 | 5.10 | 0.51 | -3.31 |
| IPI00160552 | Isoform 1 of Tenascin-R precursor               | R.LNPATEYEISLNSVR.G         | 3 | 2.97 | 0.23 | -2.30 |
| IPI00160552 | Isoform 1 of Tenascin-R precursor               | R.QSALISWQPPR.A             | 2 | 2.65 | 0.23 | -4.06 |
| IPI00160552 | Isoform 1 of Tenascin-R precursor               | R.QSALISWQPPRAEIENYVLTYK.S  | 3 | 3.24 | 0.31 | -2.44 |
| IPI00160552 | Isoform 1 of Tenascin-R precursor               | R.RQNGQTDFFR.K              | 2 | 2.25 | 0.06 | -3.28 |
| IPI00160552 | Isoform 1 of Tenascin-R precursor               | R.SPPTSASVSTVIDGPTQILVR.D   | 2 | 4.24 | 0.35 | -1.62 |
| IPI00160552 | Isoform 1 of Tenascin-R precursor               | R.TSYTLTDLEPGAIEYIISVTAER.G | 2 | 4.82 | 0.55 | -5.22 |
| IPI00160552 | Isoform 1 of Tenascin-R precursor               | R.VGFGNVEDEFWLGLDNIHR.I     | 2 | 4.81 | 0.49 | -1.27 |
| IPI00160552 | Isoform 1 of Tenascin-R precursor               | R.VGFGNVEDEFWLGLDNIHR.I     | 3 | 5.58 | 0.53 | -3.95 |
| IPI00160552 | Isoform 1 of Tenascin-R precursor               | R.VSYRPTQVGR.L              | 2 | 2.98 | 0.11 | -0.60 |
| IPI00160552 | Isoform 1 of Tenascin-R precursor               | R.YEVSVSAVR.G               | 2 | 2.34 | 0.17 | -2.90 |
| IPI00161119 | Isoform 1 of NF-kappa-B inhibitor beta          | R.TPLGSAMLRPNPILAR.L        | 2 | 2.41 | 0.15 |       |
| IPI00162329 | Isoform 1 of Transmembrane protein 25 precursor | G.ELEPQIDGQTWAER.A          | 2 | 3.69 | 0.49 | -3.41 |

|             |                                                 |                                 |   |      |      |       |
|-------------|-------------------------------------------------|---------------------------------|---|------|------|-------|
| IPI00162329 | Isoform 1 of Transmembrane protein 25 precursor | R.HPSLISSDSNNLK.L               | 2 | 1.85 | 0.07 | -2.18 |
| IPI00162329 | Isoform 1 of Transmembrane protein 25 precursor | R.LAWYLDGQLQEASTSR.L            | 2 | 4.71 | 0.33 | -1.71 |
| IPI00162329 | Isoform 1 of Transmembrane protein 25 precursor | R.VAGGPGTPR.L                   | 2 | 2.27 | 0.32 | -2.70 |
| IPI00162547 | latrophilin 3 precursor                         | K.DSLVDVPPFNSYQYIAAVDYNPR.D     | 2 | 4.00 | 0.47 | -2.01 |
| IPI00162547 | latrophilin 3 precursor                         | K.DSLVDVPPFNSYQYIAAVDYNPR.D     | 3 | 4.00 | 0.35 | -1.19 |
| IPI00162547 | latrophilin 3 precursor                         | K.LPHRVDGTGFVVYDGFALFFNKER.T    | 4 | 3.06 | 0.16 | -2.36 |
| IPI00162547 | latrophilin 3 precursor                         | K.SGEAIIANANYHDTSPYR.W          | 2 | 4.98 | 0.55 | -2.43 |
| IPI00162547 | latrophilin 3 precursor                         | K.SGEAIIANANYHDTSPYR.W          | 3 | 2.74 | 0.31 | -1.88 |
| IPI00162547 | latrophilin 3 precursor                         | K.YLEVQYECVPYKVEQK.V            | 2 | 4.70 | 0.41 | -1.37 |
| IPI00162547 | latrophilin 3 precursor                         | K.YLEVQYECVPYKVEQK.V            | 3 | 2.88 | 0.11 | -1.68 |
| IPI00162547 | latrophilin 3 precursor                         | M.IVISQLNPYTLR.F                | 1 | 2.56 | 0.17 | -1.54 |
| IPI00162547 | latrophilin 3 precursor                         | M.IVISQLNPYTLR.F                | 2 | 3.88 | 0.38 | -4.45 |
| IPI00162547 | latrophilin 3 precursor                         | R.CPGTDVIM*IESANYGR.T           | 2 | 3.68 | 0.30 | -2.71 |
| IPI00162547 | latrophilin 3 precursor                         | R.CPGTDVIM*IESANYGR.T           | 3 | 4.20 | 0.32 | -3.93 |
| IPI00162547 | latrophilin 3 precursor                         | R.DNLLYVWNNYHVVK.Y              | 2 | 3.62 | 0.36 | -1.84 |
| IPI00162547 | latrophilin 3 precursor                         | R.DNLLYVWNNYHVVK.Y              | 3 | 3.03 | 0.13 | 0.34  |
| IPI00162547 | latrophilin 3 precursor                         | R.IKSGEAIIANANYHDTSPYR.W        | 2 | 5.85 | 0.62 | -2.28 |
| IPI00162547 | latrophilin 3 precursor                         | R.IKSGEAIIANANYHDTSPYR.W        | 3 | 3.35 | 0.33 | -2.35 |
| IPI00162547 | latrophilin 3 precursor                         | R.TDDKICSDPAQM*ENIR.C           | 3 | 4.29 | 0.40 | -2.56 |
| IPI00162547 | latrophilin 3 precursor                         | R.TDTLTEYSSKDDFIAGRPTTTYK.L     | 3 | 4.73 | 0.34 | -3.96 |
| IPI00162547 | latrophilin 3 precursor                         | R.TDTLTEYSSKDDFIAGRPTTTYKLPHR.V | 3 | 5.59 | 0.41 | -3.99 |
| IPI00162547 | latrophilin 3 precursor                         | R.TDTLTEYSSKDDFIAGRPTTTYKLPHR.V | 4 | 4.57 | 0.47 | -2.70 |
| IPI00162547 | latrophilin 3 precursor                         | R.VDGTGFVVYDGFALFFNKER.T        | 3 | 3.16 | 0.27 | -2.55 |
| IPI00162735 | Isoform 2 of Attractin precursor                | K.CFSSDFM*AYDIACDR.W            | 2 | 3.79 | 0.38 |       |
| IPI00162735 | Isoform 2 of Attractin precursor                | K.CTWLIEGQPNR.I                 | 2 | 2.52 | 0.25 | -1.78 |
| IPI00162735 | Isoform 2 of Attractin precursor                | K.DSFSNEKFDFR.N                 | 2 | 2.13 | 0.15 | -1.18 |
| IPI00162735 | Isoform 2 of Attractin precursor                | K.EQYAVVGHSAHIVTLK.N            | 2 | 4.01 | 0.38 | -3.27 |
| IPI00162735 | Isoform 2 of Attractin precursor                | K.GVKGDECQLCEVENR.Y             | 2 | 4.88 | 0.47 |       |
| IPI00162735 | Isoform 2 of Attractin precursor                | K.GVKGDECQLCEVENR.Y             | 3 | 4.39 | 0.14 |       |
| IPI00162735 | Isoform 2 of Attractin precursor                | K.HCETCISGFYGDPTNGGK.C          | 2 | 4.94 | 0.43 |       |
| IPI00162735 | Isoform 2 of Attractin precursor                | K.ITTAKENYDNAK.L                | 2 | 3.94 | 0.45 | -3.21 |
| IPI00162735 | Isoform 2 of Attractin precursor                | K.LTLTPWVGLR.K                  | 2 | 2.62 | 0.22 | -2.41 |
| IPI00162735 | Isoform 2 of Attractin precursor                | K.TNIKEYKDSFSNEK.F              | 2 | 4.56 | 0.37 | -3.45 |
| IPI00162735 | Isoform 2 of Attractin precursor                | K.TNIKEYKDSFSNEK.F              | 3 | 3.87 | 0.39 | -2.55 |
| IPI00162735 | Isoform 2 of Attractin precursor                | K.TNIKEYKDSFSNEKFDFR.N          | 3 | 2.66 | 0.19 | -4.84 |
| IPI00162735 | Isoform 2 of Attractin precursor                | K.TNIKEYKDSFSNEKFDFR.N          | 4 | 2.41 | 0.10 | -4.54 |
| IPI00162735 | Isoform 2 of Attractin precursor                | R.ALYVHGGYK.A                   | 1 | 2.29 | 0.32 | -3.97 |
| IPI00162735 | Isoform 2 of Attractin precursor                | R.ALYVHGGYK.A                   | 2 | 1.94 | 0.12 | -1.44 |
| IPI00162735 | Isoform 2 of Attractin precursor                | R.CNPGTGQCVCAGWVGEQCQHCGR.F     | 3 | 3.63 | 0.31 |       |
| IPI00162735 | Isoform 2 of Attractin precursor                | R.DLDM*FINASK.N                 | 2 | 3.25 | 0.39 | -3.44 |
| IPI00162735 | Isoform 2 of Attractin precursor                | R.FRLTGSSGFVTDGPGNYKYK.T        | 3 | 3.32 | 0.22 |       |
| IPI00162735 | Isoform 2 of Attractin precursor                | R.LADDLYR.Y                     | 2 | 2.64 | 0.22 | -5.11 |

|             |                                                           |                                 |   |      |      |       |
|-------------|-----------------------------------------------------------|---------------------------------|---|------|------|-------|
| IPI00162735 | Isoform 2 of Attractin precursor                          | R.LADDLYRYDVTQM*WTILK.D         | 3 | 2.78 | 0.12 | -3.63 |
| IPI00162735 | Isoform 2 of Attractin precursor                          | R.LTGSSGFVTDGPGNYK.Y            | 2 | 4.63 | 0.44 | -4.40 |
| IPI00162735 | Isoform 2 of Attractin precursor                          | R.NHNALLASLTQK.K                | 2 | 4.25 | 0.53 | -4.61 |
| IPI00162735 | Isoform 2 of Attractin precursor                          | R.SCALDQNCQWEPR.N               | 2 | 3.47 | 0.28 |       |
| IPI00162735 | Isoform 2 of Attractin precursor                          | R.SEAACLAAGPGIR.C               | 2 | 3.70 | 0.16 | -3.73 |
| IPI00162735 | Isoform 2 of Attractin precursor                          | R.SVNNVVVR.Y                    | 1 | 1.64 | 0.20 | -2.12 |
| IPI00162735 | Isoform 2 of Attractin precursor                          | R.SVNNVVVR.Y                    | 2 | 2.61 | 0.08 | -1.63 |
| IPI00162735 | Isoform 2 of Attractin precursor                          | R.YGHSLALYKDK.I                 | 2 | 2.82 | 0.06 | -3.70 |
| IPI00162735 | Isoform 2 of Attractin precursor                          | R.YGHSLALYKDK.I                 | 3 | 2.72 | 0.09 | -4.07 |
| IPI00162735 | Isoform 2 of Attractin precursor                          | R.YQGNPLR.G                     | 2 | 1.58 | 0.12 | -3.11 |
| IPI00163187 | Fascin                                                    | K.LINRPIIVFR.G                  | 2 | 2.34 | 0.26 | -3.61 |
| IPI00163187 | Fascin                                                    | K.LINRPIIVFR.G                  | 3 | 2.20 | 0.29 | -4.19 |
| IPI00163187 | Fascin                                                    | K.VNASASSLKK.K                  | 2 | 2.56 | 0.18 | -2.16 |
| IPI00163187 | Fascin                                                    | K.YLTAEAFGFK.V                  | 2 | 2.96 | 0.21 | -2.88 |
| IPI00163187 | Fascin                                                    | R.KVTGTL DANR.S                 | 2 | 2.45 | 0.30 | -0.35 |
| IPI00163187 | Fascin                                                    | R.LVARPEPATGYTLEFR.S            | 2 | 3.01 | 0.31 | -3.34 |
| IPI00163187 | Fascin                                                    | R.LVARPEPATGYTLEFR.S            | 3 | 5.26 | 0.48 | -2.62 |
| IPI00163187 | Fascin                                                    | R.PADEIAVDRDVPWGVDSLITLAFQDQR.Y | 3 | 4.63 | 0.42 | -6.20 |
| IPI00163187 | Fascin                                                    | R.YFGGTEDR.L                    | 2 | 1.72 | 0.20 | -0.77 |
| IPI00163187 | Fascin                                                    | R.YLAPSGPSGTLK.A                | 2 | 2.45 | 0.12 | -0.75 |
| IPI00163187 | Fascin                                                    | R.YLKGDHAGVLK.A                 | 2 | 2.29 | 0.25 | -3.44 |
| IPI00163187 | Fascin                                                    | R.YSVQTADHR.F                   | 2 | 2.40 | 0.29 | -3.56 |
| IPI00163207 | Isoform 1 of N-acetylmuramoyl-L-alanine amidase precursor | A.SLPLLM*DSVIQALAELEQK.V        | 2 | 6.11 | 0.46 | -4.29 |
| IPI00163207 | Isoform 1 of N-acetylmuramoyl-L-alanine amidase precursor | A.SLPLLM*DSVIQALAELEQK.V        | 3 | 5.28 | 0.35 | -3.10 |
| IPI00163207 | Isoform 1 of N-acetylmuramoyl-L-alanine amidase precursor | A.SLPLLM*DSVIQALAELEQKVPAAK.T   | 2 | 4.82 | 0.48 | -4.58 |
| IPI00163207 | Isoform 1 of N-acetylmuramoyl-L-alanine amidase precursor | A.SLPLLM*DSVIQALAELEQKVPAAK.T   | 4 | 4.95 | 0.44 | -2.28 |
| IPI00163207 | Isoform 1 of N-acetylmuramoyl-L-alanine amidase precursor | A.SLPLLMDSVIQALAELEQK.V         | 2 | 4.45 | 0.41 | -2.33 |
| IPI00163207 | Isoform 1 of N-acetylmuramoyl-L-alanine amidase precursor | A.SLPLLMDSVIQALAELEQKVPAAK.T    | 2 | 5.34 | 0.38 | -4.42 |
| IPI00163207 | Isoform 1 of N-acetylmuramoyl-L-alanine amidase precursor | D.GSPDVTADIGANTPDATK.G          | 2 | 4.15 | 0.51 | -2.32 |
| IPI00163207 | Isoform 1 of N-acetylmuramoyl-L-alanine amidase precursor | E.TGDTFPDVVAIPDVR.A             | 2 | 2.90 | 0.16 | -4.28 |
| IPI00163207 | Isoform 1 of N-acetylmuramoyl-L-alanine amidase precursor | K.ASLTLM*AFLNGALDGVILGDYLSR.T   | 2 | 5.56 | 0.51 | -5.10 |
| IPI00163207 | Isoform 1 of N-acetylmuramoyl-L-alanine amidase precursor | K.EFTEAFLGCPAIHPR.C             | 3 | 2.72 | 0.38 | -2.71 |

|             |                                                           |                                      |   |      |      |       |
|-------------|-----------------------------------------------------------|--------------------------------------|---|------|------|-------|
| IPI00163207 | Isoform 1 of N-acetylmuramoyl-L-alanine amidase precursor | K.EYGVVLAPDGSTVAVEPLLAGLEAGLQGR.R    | 2 | 5.16 | 0.59 | -2.92 |
| IPI00163207 | Isoform 1 of N-acetylmuramoyl-L-alanine amidase precursor | K.EYGVVLAPDGSTVAVEPLLAGLEAGLQGR.R    | 3 | 6.62 | 0.54 | -4.62 |
| IPI00163207 | Isoform 1 of N-acetylmuramoyl-L-alanine amidase precursor | K.GCPDVQASLPDAK.A                    | 2 | 2.72 | 0.30 | -2.48 |
| IPI00163207 | Isoform 1 of N-acetylmuramoyl-L-alanine amidase precursor | K.LLQLPLGFLYVHHTYVPAPPCTDFTR.C       | 3 | 3.87 | 0.33 | -4.57 |
| IPI00163207 | Isoform 1 of N-acetylmuramoyl-L-alanine amidase precursor | K.LLQLPLGFLYVHHTYVPAPPCTDFTR.C       | 4 | 2.63 | 0.10 | -4.36 |
| IPI00163207 | Isoform 1 of N-acetylmuramoyl-L-alanine amidase precursor | L.PLLM*DSVIQALAELEQKVPAAK.T          | 3 | 3.98 | 0.43 | -1.03 |
| IPI00163207 | Isoform 1 of N-acetylmuramoyl-L-alanine amidase precursor | M.AFLNGALDGVILGDYLSR.T               | 2 | 5.52 | 0.53 | -6.31 |
| IPI00163207 | Isoform 1 of N-acetylmuramoyl-L-alanine amidase precursor | M.AFLNGALDGVILGDYLSR.T               | 3 | 4.19 | 0.29 | -3.82 |
| IPI00163207 | Isoform 1 of N-acetylmuramoyl-L-alanine amidase precursor | R.AGLLRPDYALLGHR.Q                   | 2 | 3.86 | 0.46 | -2.08 |
| IPI00163207 | Isoform 1 of N-acetylmuramoyl-L-alanine amidase precursor | R.AGLLRPDYALLGHR.Q                   | 3 | 4.59 | 0.35 | -2.91 |
| IPI00163207 | Isoform 1 of N-acetylmuramoyl-L-alanine amidase precursor | R.DGSPDVTTADIGANTPDATK.G             | 2 | 6.12 | 0.59 | -2.87 |
| IPI00163207 | Isoform 1 of N-acetylmuramoyl-L-alanine amidase precursor | R.DGSPDVTTADIGANTPDATK.G             | 3 | 3.31 | 0.35 | -1.24 |
| IPI00163207 | Isoform 1 of N-acetylmuramoyl-L-alanine amidase precursor | R.DTLPSCAVR.A                        | 2 | 2.69 | 0.27 | -3.42 |
| IPI00163207 | Isoform 1 of N-acetylmuramoyl-L-alanine amidase precursor | R.EGKEYGVVLAPDGSTVAVEPLLAGLEAGLQGR.R | 2 | 3.34 | 0.52 | -3.71 |
| IPI00163207 | Isoform 1 of N-acetylmuramoyl-L-alanine amidase precursor | R.EGKEYGVVLAPDGSTVAVEPLLAGLEAGLQGR.R | 3 | 7.36 | 0.64 | -4.83 |
| IPI00163207 | Isoform 1 of N-acetylmuramoyl-L-alanine amidase precursor | R.PSLSHLLSQYYGAGVAR.D                | 2 | 4.86 | 0.49 | -5.19 |
| IPI00163207 | Isoform 1 of N-acetylmuramoyl-L-alanine amidase precursor | R.PSLSHLLSQYYGAGVAR.D                | 3 | 5.19 | 0.39 | -4.26 |
| IPI00163207 | Isoform 1 of N-acetylmuramoyl-L-alanine amidase precursor | R.QNGAALTSASILAQQVWGTLVLLQR.L        | 3 | 4.32 | 0.19 | -3.01 |
| IPI00163207 | Isoform 1 of N-acetylmuramoyl-L-alanine amidase precursor | R.QNGAALTSASILAQQVWGTLVLLQR.L        | 4 | 2.99 | 0.13 | -0.95 |
| IPI00163207 | Isoform 1 of N-acetylmuramoyl-L-alanine amidase precursor | R.RVINLPLDSM*AAPWETGDTFPDVVAIAPDVR.A | 3 | 5.87 | 0.53 | -3.82 |
| IPI00163207 | Isoform 1 of N-acetylmuramoyl-L-alanine amidase precursor | R.TDCPGDALFDLLR.T                    | 2 | 3.97 | 0.36 | -3.05 |

|             |                                                           |                                  |   |      |      |       |
|-------------|-----------------------------------------------------------|----------------------------------|---|------|------|-------|
| IPI00163207 | Isoform 1 of N-acetylmuramoyl-L-alanine amidase precursor | R.TFTLLDPK.A                     | 2 | 2.53 | 0.25 | -2.38 |
| IPI00163207 | Isoform 1 of N-acetylmuramoyl-L-alanine amidase precursor | R.TPEPRPSLSHLLSQYYGAGVAR.D       | 2 | 3.46 | 0.36 | -4.66 |
| IPI00163207 | Isoform 1 of N-acetylmuramoyl-L-alanine amidase precursor | R.TPEPRPSLSHLLSQYYGAGVAR.D       | 3 | 5.70 | 0.49 | -4.27 |
| IPI00163207 | Isoform 1 of N-acetylmuramoyl-L-alanine amidase precursor | R.TPEPRPSLSHLLSQYYGAGVAR.D       | 4 | 3.73 | 0.36 | -3.26 |
| IPI00163207 | Isoform 1 of N-acetylmuramoyl-L-alanine amidase precursor | S.LPLLM*DSVIQALAELEQKVPAAK.T     | 3 | 5.73 | 0.49 | -3.66 |
| IPI00163207 | Isoform 1 of N-acetylmuramoyl-L-alanine amidase precursor | W.ETGDTFPDVVAIAPDVR.A            | 2 | 3.69 | 0.41 | -2.18 |
| IPI00163207 | Isoform 1 of N-acetylmuramoyl-L-alanine amidase precursor | W.ETGDTFPDVVAIAPDVR.A            | 3 | 3.98 | 0.20 | -2.12 |
| IPI00163391 | Isoform 1 of Putative methyltransferase METT10D           | R.RPPPSSVNTGGITEIMAEGGELEFVKR.I  | 3 | 3.08 | 0.13 |       |
| IPI00163446 | IGHD protein                                              | K.CVVQHTASK.S                    | 2 | 2.61 | 0.10 |       |
| IPI00163446 | IGHD protein                                              | K.NSLYLQM*NSLR.A                 | 2 | 3.76 | 0.14 |       |
| IPI00163446 | IGHD protein                                              | K.NSLYLQMNSLR.A                  | 1 | 3.55 | 0.11 |       |
| IPI00163446 | IGHD protein                                              | K.NSLYLQMNSLR.A                  | 2 | 4.01 | 0.17 |       |
| IPI00163446 | IGHD protein                                              | K.VPTGGVEEGLLER.H                | 2 | 4.05 | 0.41 |       |
| IPI00163446 | IGHD protein                                              | R.AEDTALYCAK.H                   | 2 | 3.60 | 0.41 |       |
| IPI00163446 | IGHD protein                                              | R.DNAKNSLYLQM*NSLR.A             | 2 | 4.82 | 0.44 |       |
| IPI00163446 | IGHD protein                                              | R.DNAKNSLYLQM*NSLR.A             | 3 | 4.39 | 0.37 |       |
| IPI00163446 | IGHD protein                                              | R.LSCAASGFTFDDYAMHWVR.Q          | 2 | 2.32 | 0.18 |       |
| IPI00163446 | IGHD protein                                              | R.LSCAASGFTFDDYAMHWVR.Q          | 3 | 3.33 | 0.17 |       |
| IPI00163446 | IGHD protein                                              | R.SLWNAGTSVTCTLNHPSLPPQR.L       | 2 | 3.03 | 0.14 |       |
| IPI00163446 | IGHD protein                                              | R.VPAPPSPQPATYTCVVSHEDSR.T       | 3 | 4.12 | 0.39 |       |
| IPI00163563 | PEBP family protein precursor                             | K.FPGAVDGATYILVM*VDPDAPSR.A      | 2 | 5.45 | 0.57 | -2.76 |
| IPI00163563 | PEBP family protein precursor                             | K.FPGAVDGATYILVM*VDPDAPSR.A      | 3 | 5.10 | 0.41 | -4.98 |
| IPI00163563 | PEBP family protein precursor                             | K.FPGAVDGATYILVM*VDPDAPSRAEPR.Q  | 3 | 4.10 | 0.44 | -4.59 |
| IPI00163563 | PEBP family protein precursor                             | K.FPGAVDGATYILVM*VDPDAPSRAEPR.Q  | 4 | 3.53 | 0.27 | -4.14 |
| IPI00163563 | PEBP family protein precursor                             | K.GKIQQQELSAYQAPSPPAHSGFHR.Y     | 4 | 3.25 | 0.24 | -3.02 |
| IPI00163563 | PEBP family protein precursor                             | K.IQQQELSAYQAPSPPAHSGFHR.Y       | 2 | 4.90 | 0.56 | -3.16 |
| IPI00163563 | PEBP family protein precursor                             | K.IQQQELSAYQAPSPPAHSGFHR.Y       | 3 | 4.32 | 0.53 | -2.69 |
| IPI00163563 | PEBP family protein precursor                             | K.IQQQELSAYQAPSPPAHSGFHR.Y       | 4 | 3.47 | 0.30 | -1.77 |
| IPI00163563 | PEBP family protein precursor                             | K.ITSWM*EPIVK.F                  | 2 | 2.56 | 0.33 | -2.90 |
| IPI00163563 | PEBP family protein precursor                             | K.VISLLPKENK.T                   | 2 | 2.79 | 0.19 | -2.79 |
| IPI00163563 | PEBP family protein precursor                             | Q.NYQDSPTLQAPR.E                 | 2 | 4.18 | 0.49 | 1.10  |
| IPI00163563 | PEBP family protein precursor                             | R.FHLGEPEASTQFM*TQN.N            | 2 | 4.05 | 0.51 | -2.41 |
| IPI00163563 | PEBP family protein precursor                             | R.FHLGEPEASTQFM*TQNY.Y           | 2 | 3.66 | 0.46 | -2.83 |
| IPI00163563 | PEBP family protein precursor                             | R.FHLGEPEASTQFM*TQNY.Q           | 2 | 4.43 | 0.59 | -1.65 |
| IPI00163563 | PEBP family protein precursor                             | R.FHLGEPEASTQFM*TQNYQDSPTLQAPR.E | 2 | 4.39 | 0.59 | -0.29 |



|             |                                                                                |                                               |   |      |      |       |
|-------------|--------------------------------------------------------------------------------|-----------------------------------------------|---|------|------|-------|
| IPI00163563 | PEBP family protein precursor                                                  | R.FHLGEPEASTQFM*TQNYQDSPTLQAPR.E              | 3 | 6.95 | 0.60 | -6.37 |
| IPI00163563 | PEBP family protein precursor                                                  | R.FHLGEPEASTQFM*TQNYQDSPTLQAPR.E              | 4 | 4.13 | 0.37 | -1.34 |
| IPI00163563 | PEBP family protein precursor                                                  | R.HWLVTDIK.G                                  | 2 | 1.97 | 0.15 | 1.10  |
| IPI00163563 | PEBP family protein precursor                                                  | R.YQFFVYLQEGK.V                               | 1 | 3.15 | 0.29 | -2.29 |
| IPI00163563 | PEBP family protein precursor                                                  | R.YQFFVYLQEGK.V                               | 2 | 4.55 | 0.44 | -5.10 |
| IPI00163601 | Putative uncharacterized protein FLJ10213                                      | -.M*GYFLKLYAVVNSHSLFVWVCDRSYKR.S              | 3 | 3.46 | 0.12 |       |
| IPI00163724 | Potassium/sodium hyperpolarization-activated cyclic nucleotide-gated channel 3 | R.EEIINFPCR.G                                 | 2 | 2.78 | 0.06 |       |
| IPI00163851 | Isoform 1 of Eukaryotic translation initiation factor 2-alpha kinase 4         | -.M*AGGRGAPGR.G                               | 2 | 1.90 | 0.16 |       |
| IPI00164066 | Isoform 4 of Coiled-coil domain-containing protein 136                         | K.EQCGDELVAEPADPEEAK.S                        | 2 | 1.69 | 0.09 | -1.24 |
| IPI00164861 | Isoform 3 of Kinesin-like protein KIF13A                                       | R.KRGAVSEPAIQVRRK.G                           | 2 | 2.16 | 0.17 |       |
| IPI00164949 | Isoform NELF-C of Negative elongation factor C/D                               | K.AVETVHNLCCNENKGASELVAELSTLYQCIRFPVAM*GVLK.W | 5 | 3.37 | 0.13 | -7.81 |
| IPI00165009 | Isoform 3 of MBT domain-containing protein 1                                   | K.WFDYLR.E                                    | 1 | 1.83 | 0.08 | -2.52 |
| IPI00165044 | Isoform 2 of Uncharacterized protein C4orf18                                   | R.AGGPDFLQPSSR.E                              | 2 | 2.81 | 0.10 | -2.49 |
| IPI00165044 | Isoform 2 of Uncharacterized protein C4orf18                                   | R.ASLQHGGAAEKGPHR.S                           | 2 | 3.66 | 0.29 | -4.38 |
| IPI00165044 | Isoform 2 of Uncharacterized protein C4orf18                                   | R.ASLQHGGAAEKGPHR.S                           | 3 | 3.50 | 0.24 | -2.81 |
| IPI00165044 | Isoform 2 of Uncharacterized protein C4orf18                                   | R.EADAVAPGYAQGANLVK.I                         | 2 | 4.43 | 0.44 | -3.25 |
| IPI00165044 | Isoform 2 of Uncharacterized protein C4orf18                                   | R.LLVLEGGAPGAVLR.C                            | 2 | 3.83 | 0.43 | -2.94 |
| IPI00165044 | Isoform 2 of Uncharacterized protein C4orf18                                   | R.LTWGTYQQLLQ.Q                               | 2 | 3.34 | 0.25 | -2.30 |
| IPI00165125 | Isoform 1 of Uncharacterized protein C14orf37 precursor                        | K.EM*LTTNPK.T                                 | 2 | 1.66 | 0.13 | -2.06 |
| IPI00165125 | Isoform 1 of Uncharacterized protein C14orf37 precursor                        | K.LGDNEETQVR.T                                | 2 | 3.87 | 0.37 | -0.64 |
| IPI00165125 | Isoform 1 of Uncharacterized protein C14orf37 precursor                        | K.TEKFEADTDHR.T                               | 2 | 3.10 | 0.39 | -3.52 |
| IPI00165229 | proprotein convertase subtilisin/kexin type 5 preproprotein                    | T.ILDDGIER.N                                  | 2 | 3.02 | 0.19 | -3.22 |
| IPI00165438 | Muscle type neuropilin 1                                                       | K.EGNKPVLFGQNTNPTDVVVAVFPKPLITR.F             | 3 | 3.04 | 0.35 | -4.25 |
| IPI00165438 | Muscle type neuropilin 1                                                       | K.EGNKPVLFGQNTNPTDVVVAVFPKPLITR.F             | 4 | 3.51 | 0.30 | -2.50 |
| IPI00165438 | Muscle type neuropilin 1                                                       | K.FVSDYETHGAGFSIR.Y                           | 2 | 4.43 | 0.47 | -4.03 |
| IPI00165438 | Muscle type neuropilin 1                                                       | K.IAPPPVVSSGPFLFIK.F                          | 2 | 1.36 | 0.49 | -3.69 |
| IPI00165438 | Muscle type neuropilin 1                                                       | K.IAPPPVVSSGPFLFIK.F                          | 3 | 4.77 | 0.46 | -1.49 |
| IPI00165438 | Muscle type neuropilin 1                                                       | K.SFEGNNNYDTPELR.T                            | 2 | 3.75 | 0.46 | -4.94 |
| IPI00165438 | Muscle type neuropilin 1                                                       | K.SPGFPEKYPNSLECTYIVFAPK.M                    | 2 | 2.39 | 0.31 | -1.23 |
| IPI00165438 | Muscle type neuropilin 1                                                       | K.SPGFPEKYPNSLECTYIVFAPK.M                    | 3 | 5.47 | 0.49 | -1.99 |
| IPI00165438 | Muscle type neuropilin 1                                                       | R.EWIVQVDLGLLR.F                              | 2 | 3.02 | 0.36 | -2.23 |
| IPI00165438 | Muscle type neuropilin 1                                                       | R.FVTAVGTQGAISK.E                             | 2 | 4.71 | 0.37 | -3.52 |
| IPI00165438 | Muscle type neuropilin 1                                                       | R.IM*INFNPHFDELR.D                            | 3 | 3.14 | 0.19 | -3.83 |
| IPI00165936 | Isoform A of Chloride intracellular channel 6                                  | K.LGTQHPESENSAGNDVFAK.F                       | 3 | 2.46 | 0.21 | -2.03 |
| IPI00165936 | Isoform A of Chloride intracellular channel 6                                  | R.VGDSVDAEGPAGDSVDAEGR.V                      | 2 | 5.08 | 0.59 | -2.52 |

|             |                                                     |                                |   |      |      |       |
|-------------|-----------------------------------------------------|--------------------------------|---|------|------|-------|
| IPI00165949 | Isoform 2 of Endoplasmic reticulum aminopeptidase 1 | K.FELGSSSIAHM*VM*GTTNQFSTR.T   | 3 | 3.40 | 0.34 | -1.64 |
| IPI00165949 | Isoform 2 of Endoplasmic reticulum aminopeptidase 1 | K.GFFSSLKENGSQLR.C             | 2 | 3.77 | 0.44 | -2.32 |
| IPI00165949 | Isoform 2 of Endoplasmic reticulum aminopeptidase 1 | K.GFFSSLKENGSQLR.C             | 3 | 2.20 | 0.23 | -1.65 |
| IPI00165949 | Isoform 2 of Endoplasmic reticulum aminopeptidase 1 | K.IKTQEFPQILTLIGR.N            | 3 | 3.45 | 0.35 | -3.39 |
| IPI00165949 | Isoform 2 of Endoplasmic reticulum aminopeptidase 1 | K.SGIVQYLQK.H                  | 2 | 3.07 | 0.11 | -0.78 |
| IPI00165949 | Isoform 2 of Endoplasmic reticulum aminopeptidase 1 | K.SQIEFALCR.T                  | 2 | 2.93 | 0.33 | -0.89 |
| IPI00165949 | Isoform 2 of Endoplasmic reticulum aminopeptidase 1 | K.TQEFPQILTLIGR.N              | 2 | 4.22 | 0.46 | -3.34 |
| IPI00165949 | Isoform 2 of Endoplasmic reticulum aminopeptidase 1 | K.VGDYFFGK.C                   | 2 | 2.98 | 0.25 | -1.91 |
| IPI00165949 | Isoform 2 of Endoplasmic reticulum aminopeptidase 1 | K.YQFSLSTEK.S                  | 2 | 2.62 | 0.30 | -1.75 |
| IPI00165949 | Isoform 2 of Endoplasmic reticulum aminopeptidase 1 | R.ASLINNAFQLVLSIGK.L           | 2 | 4.93 | 0.48 | -2.73 |
| IPI00165949 | Isoform 2 of Endoplasmic reticulum aminopeptidase 1 | R.DM*NEVETQFK.A                | 2 | 3.82 | 0.31 | -1.45 |
| IPI00165949 | Isoform 2 of Endoplasmic reticulum aminopeptidase 1 | R.EM*FDDVSYDK.G                | 2 | 2.16 | 0.17 | -3.51 |
| IPI00165949 | Isoform 2 of Endoplasmic reticulum aminopeptidase 1 | R.ESALLFDAEK.S                 | 2 | 2.00 | 0.12 | -1.84 |
| IPI00165949 | Isoform 2 of Endoplasmic reticulum aminopeptidase 1 | R.ILASTQFEPTAAR.M              | 2 | 4.89 | 0.48 | -4.07 |
| IPI00165949 | Isoform 2 of Endoplasmic reticulum aminopeptidase 1 | R.LSEEPLQVLEHPR.Q              | 3 | 3.30 | 0.36 | -1.55 |
| IPI00165949 | Isoform 2 of Endoplasmic reticulum aminopeptidase 1 | R.NPVGYPPLAWQFLR.K             | 2 | 3.60 | 0.41 | -4.46 |
| IPI00165972 | Complement factor D preproprotein                   | K.VQVLLGAHLSLQPEPSK.R          | 3 | 3.12 | 0.34 | -0.80 |
| IPI00165972 | Complement factor D preproprotein                   | K.VQVLLGAHLSLQPEPSK.R.L        | 2 | 5.48 | 0.57 | -3.27 |
| IPI00165972 | Complement factor D preproprotein                   | K.VQVLLGAHLSLQPEPSK.R.L        | 3 | 4.70 | 0.49 | -2.78 |
| IPI00165972 | Complement factor D preproprotein                   | R.AVPHPDSPDPTIDHLLLLQLSEK.A    | 2 | 4.89 | 0.49 | -2.70 |
| IPI00165972 | Complement factor D preproprotein                   | R.AVPHPDSPDPTIDHLLLLQLSEK.A    | 3 | 4.16 | 0.41 | -4.24 |
| IPI00165972 | Complement factor D preproprotein                   | R.AVPHPDSPDPTIDHLLLLQLSEK.A    | 4 | 3.36 | 0.20 | -2.42 |
| IPI00165972 | Complement factor D preproprotein                   | R.DSCKGDSGGPLVCGGVLEGVVTSGSR.V | 2 | 5.30 | 0.58 | -3.24 |
| IPI00165972 | Complement factor D preproprotein                   | R.DSCKGDSGGPLVCGGVLEGVVTSGSR.V | 3 | 5.11 | 0.49 | -2.05 |
| IPI00165972 | Complement factor D preproprotein                   | R.KKPGIYTR.V                   | 2 | 1.96 | 0.12 | -2.36 |
| IPI00165972 | Complement factor D preproprotein                   | R.RPDSLQHVLLPVLDR.A            | 2 | 3.65 | 0.41 | -2.29 |

|             |                                                                     |                                           |   |      |      |       |
|-------------|---------------------------------------------------------------------|-------------------------------------------|---|------|------|-------|
| IPI00165972 | Complement factor D preproprotein                                   | R.RPDSLQHVLLPVLDR.A                       | 3 | 4.56 | 0.41 | -2.58 |
| IPI00165972 | Complement factor D preproprotein                                   | R.RPDSLQHVLLPVLDR.A                       | 4 | 2.96 | 0.28 | -1.50 |
| IPI00165972 | Complement factor D preproprotein                                   | R.VDRDVAPGTLCDVAGWGIVNHAGR.R              | 3 | 6.32 | 0.53 | -3.12 |
| IPI00165972 | Complement factor D preproprotein                                   | R.VDRDVAPGTLCDVAGWGIVNHAGR.R              | 4 | 4.32 | 0.35 | -2.26 |
| IPI00165975 | Cysteine-rich flanking region, C-terminal domain containing protein | K.HAPGAGGEPDGQAPTSEK.K                    | 3 | 2.86 | 0.11 | -0.73 |
| IPI00165975 | Cysteine-rich flanking region, C-terminal domain containing protein | K.HAPGAGGEPDGQAPTSEK.S                    | 3 | 1.71 | 0.12 | -3.07 |
| IPI00165975 | Cysteine-rich flanking region, C-terminal domain containing protein | R.AGLAFVLHCIADGHPTPR.L                    | 3 | 3.67 | 0.46 | -2.20 |
| IPI00165975 | Cysteine-rich flanking region, C-terminal domain containing protein | R.LPALPCAPPSVHLSAEPPLAEPGTPLR.A           | 3 | 4.87 | 0.52 | -3.19 |
| IPI00165975 | Cysteine-rich flanking region, C-terminal domain containing protein | R.TVEPGALAVLSQLK.N                        | 2 | 4.54 | 0.35 | -3.69 |
| IPI00165975 | Cysteine-rich flanking region, C-terminal domain containing protein | R.TVEPGALAVLSQLK.N                        | 3 | 4.08 | 0.26 | -2.21 |
| IPI00165975 | Cysteine-rich flanking region, C-terminal domain containing protein | R.VAVAATGPPK.H                            | 1 | 1.92 | 0.29 | -2.65 |
| IPI00166010 | Isoform 1 of CCR4-NOT transcription complex subunit 1               | R.EVFNCLRNLFEEYRFFPQYDPK.E                | 3 | 3.45 | 0.06 |       |
| IPI00166039 | Isoform 1 of Scotin precursor                                       | R.GLSLFPESCPDFCCGTCDDQYCCSDVLKK.F         | 3 | 2.54 | 0.10 | -1.89 |
| IPI00166048 | Isoform 1 of Cell adhesion molecule 3 precursor                     | K.AYYTLNVNDPSPVP.S                        | 2 | 3.17 | 0.24 | -2.71 |
| IPI00166048 | Isoform 1 of Cell adhesion molecule 3 precursor                     | K.CQVKDHEDSSLQWSNPAQQTLYFGEK.R            | 4 | 2.67 | 0.10 | -3.09 |
| IPI00166048 | Isoform 1 of Cell adhesion molecule 3 precursor                     | K.DTATLNCQSSGSKPAAR.L                     | 2 | 3.82 | 0.32 | -2.03 |
| IPI00166048 | Isoform 1 of Cell adhesion molecule 3 precursor                     | K.EGSVPPLK.M                              | 1 | 1.99 | 0.17 | -3.50 |
| IPI00166048 | Isoform 1 of Cell adhesion molecule 3 precursor                     | K.EGSVPPLK.M                              | 2 | 1.92 | 0.08 | -3.48 |
| IPI00166048 | Isoform 1 of Cell adhesion molecule 3 precursor                     | K.LLLHCEGR.G                              | 2 | 1.98 | 0.05 | -2.68 |
| IPI00166048 | Isoform 1 of Cell adhesion molecule 3 precursor                     | K.SDSGTYGCTATSNM*GSYK.A                   | 2 | 5.02 | 0.64 | -4.11 |
| IPI00166048 | Isoform 1 of Cell adhesion molecule 3 precursor                     | K.SDSGTYGCTATSNM*GSYK.A.Y                 | 2 | 4.90 | 0.62 | -3.61 |
| IPI00166048 | Isoform 1 of Cell adhesion molecule 3 precursor                     | K.SLVTVLGIPQKPIITG.Y                      | 2 | 3.37 | 0.34 | -4.54 |
| IPI00166048 | Isoform 1 of Cell adhesion molecule 3 precursor                     | K.SLVTVLGIPQKPIITGY.K                     | 2 | 4.27 | 0.52 | -4.60 |
| IPI00166048 | Isoform 1 of Cell adhesion molecule 3 precursor                     | K.SLVTVLGIPQKPIITGYK.S                    | 2 | 4.34 | 0.51 | -2.97 |
| IPI00166048 | Isoform 1 of Cell adhesion molecule 3 precursor                     | K.SLVTVLGIPQKPIITGYK.S                    | 3 | 3.82 | 0.46 | -1.83 |
| IPI00166048 | Isoform 1 of Cell adhesion molecule 3 precursor                     | K.TFTVSSSVTFQVTR.E                        | 2 | 4.10 | 0.49 | -6.57 |
| IPI00166048 | Isoform 1 of Cell adhesion molecule 3 precursor                     | L.VTVLGIPQKPIITGYK.S                      | 2 | 3.36 | 0.48 | -2.53 |
| IPI00166048 | Isoform 1 of Cell adhesion molecule 3 precursor                     | R.EDDGASIVCSVNHESLK.G                     | 2 | 4.36 | 0.45 | -3.36 |
| IPI00166048 | Isoform 1 of Cell adhesion molecule 3 precursor                     | R.EKDATLNCQSSGSKPAAR.L                    | 3 | 3.30 | 0.41 | -2.49 |
| IPI00166048 | Isoform 1 of Cell adhesion molecule 3 precursor                     | R.GNPVPQQYLWEK.E                          | 2 | 3.17 | 0.47 | -3.57 |
| IPI00166048 | Isoform 1 of Cell adhesion molecule 3 precursor                     | R.IEVLYTPTAM*IRPDPPHPR.E                  | 3 | 3.75 | 0.45 | -5.47 |
| IPI00166048 | Isoform 1 of Cell adhesion molecule 3 precursor                     | R.IEVLYTPTAM*IRPDPPHPR.E                  | 4 | 3.39 | 0.41 | -3.52 |
| IPI00166048 | Isoform 1 of Cell adhesion molecule 3 precursor                     | R.IQLVTSTPHELSISISNVALADEGEYTCISFTM*PVR.T | 3 | 4.31 | 0.30 | -1.00 |
| IPI00166048 | Isoform 1 of Cell adhesion molecule 3 precursor                     | R.KGDQELHGEPTTR.I                         | 2 | 3.96 | 0.41 | -3.47 |

|             |                                                                                    |                                        |   |      |      |       |
|-------------|------------------------------------------------------------------------------------|----------------------------------------|---|------|------|-------|
| IPI00166048 | Isoform 1 of Cell adhesion molecule 3 precursor                                    | R.KGDQELHGEPTR.I                       | 3 | 3.04 | 0.25 | -3.14 |
| IPI00166048 | Isoform 1 of Cell adhesion molecule 3 precursor                                    | R.STSQRIEVLYTPTAM*.I                   | 2 | 3.17 | 0.35 | -3.24 |
| IPI00166048 | Isoform 1 of Cell adhesion molecule 3 precursor                                    | R.STSQRIEVLYTPTAM*IRDPDPPHR.E          | 4 | 3.61 | 0.15 | -4.58 |
| IPI00166048 | Isoform 1 of Cell adhesion molecule 3 precursor                                    | W.SNPAQQTLYFGEK.R                      | 2 | 3.38 | 0.45 | -7.03 |
| IPI00166048 | Isoform 1 of Cell adhesion molecule 3 precursor                                    | W.SNPAQQTLYFGEK.R.A                    | 2 | 3.74 | 0.40 | -3.39 |
| IPI00166071 | B-cell CLL/lymphoma 6 member B protein                                             | R.IHTGEKPYHCDPCGLHFR.H                 | 3 | 3.22 | 0.16 |       |
| IPI00166075 | Leucine-rich repeat LGI family member 3 precursor                                  | R.DTAFCVDSK.A                          | 2 | 2.91 | 0.27 | -2.44 |
| IPI00166161 | Protein SIX6OS1                                                                    | K.FMQVRLLPQKQSNQWSEKGDK.D              | 3 | 1.77 | 0.18 | 0.01  |
| IPI00166257 | CDNA FLJ37614 fis, clone BRCOC2011769                                              | R.SWQPGPGSLAFTPR.Q                     | 2 | 2.04 | 0.17 |       |
| IPI00166339 | Isoform 1 of Ephrin type-A receptor 10 precursor                                   | K.IDTIAADESFTQGDLGER.K                 | 2 | 5.91 | 0.62 | -4.77 |
| IPI00166339 | Isoform 1 of Ephrin type-A receptor 10 precursor                                   | K.IDTIAADESFTQGDLGER.K                 | 3 | 4.34 | 0.46 | -4.05 |
| IPI00166339 | Isoform 1 of Ephrin type-A receptor 10 precursor                                   | R.DLQYLSR.S                            | 2 | 2.50 | 0.06 | 0.17  |
| IPI00166339 | Isoform 1 of Ephrin type-A receptor 10 precursor                                   | R.GLATFPATAAESAFSTLVEVAGTCVAHSEGEPPR.M | 3 | 2.41 | 0.15 | -3.63 |
| IPI00166339 | Isoform 1 of Ephrin type-A receptor 10 precursor                                   | R.GLATFPATAAESAFSTLVEVAGTCVAHSEGEPPR.M | 4 | 3.33 | 0.29 | -4.33 |
| IPI00166339 | Isoform 1 of Ephrin type-A receptor 10 precursor                                   | V.KIDTIAADESFTQGDLGER.K                | 2 | 6.39 | 0.61 | -1.98 |
| IPI00166339 | Isoform 1 of Ephrin type-A receptor 10 precursor                                   | V.KIDTIAADESFTQGDLGER.K                | 3 | 4.38 | 0.36 | -1.48 |
| IPI00166392 | Immunoglobulin superfamily member 4                                                | E.LDSEDLSDSR.A                         | 2 | 3.40 | 0.41 | -1.92 |
| IPI00166392 | Immunoglobulin superfamily member 4                                                | K.AHSDYM*L.Y                           | 1 | 1.98 | 0.22 | -3.59 |
| IPI00166392 | Immunoglobulin superfamily member 4                                                | K.SDDSVIQLLNPNR.Q                      | 2 | 3.70 | 0.29 | -3.69 |
| IPI00166392 | Immunoglobulin superfamily member 4                                                | N.SAEELDSEDLSDSR.A                     | 2 | 4.90 | 0.54 | -4.71 |
| IPI00166392 | Immunoglobulin superfamily member 4                                                | R.AVDHAVIGVVA.V                        | 1 | 2.31 | 0.40 | -0.91 |
| IPI00166392 | Immunoglobulin superfamily member 4                                                | R.CEASNIVGK.A                          | 1 | 2.64 | 0.28 | -2.53 |
| IPI00166392 | Immunoglobulin superfamily member 4                                                | R.CEASNIVGK.A                          | 2 | 2.77 | 0.28 | -1.47 |
| IPI00166392 | Immunoglobulin superfamily member 4                                                | R.DFRPLKDSR.F                          | 2 | 2.10 | 0.13 | -2.82 |
| IPI00166392 | Immunoglobulin superfamily member 4                                                | R.EGDALELTCEAIGKPQPVMTWVR.V            | 2 | 4.29 | 0.44 | -3.67 |
| IPI00166392 | Immunoglobulin superfamily member 4                                                | R.EGDALELTCEAIGKPQPVMTWVR.V            | 3 | 5.86 | 0.48 | -3.55 |
| IPI00166392 | Immunoglobulin superfamily member 4                                                | R.NLM*IDIQK.D                          | 1 | 2.81 | 0.11 | -3.72 |
| IPI00166392 | Immunoglobulin superfamily member 4                                                | R.NLM*IDIQK.D                          | 2 | 2.82 | 0.05 | -1.88 |
| IPI00166392 | Immunoglobulin superfamily member 4                                                | R.QTIYFR.D                             | 2 | 1.24 | 0.06 | -2.35 |
| IPI00166392 | Immunoglobulin superfamily member 4                                                | R.VDDEM*PQHAVLSPNLFINLNK.T             | 3 | 6.32 | 0.43 | -3.17 |
| IPI00166392 | Immunoglobulin superfamily member 4                                                | R.YFCQLYTDPPQESYTTITVLVPPR.N           | 2 | 4.32 | 0.57 | -3.87 |
| IPI00166392 | Immunoglobulin superfamily member 4                                                | R.YFCQLYTDPPQESYTTITVLVPPR.N           | 3 | 3.15 | 0.32 | -3.46 |
| IPI00166392 | Immunoglobulin superfamily member 4                                                | R.YFCQLYTDPPQESYTTITVLVPPR.N           | 4 | 4.48 | 0.38 | -4.83 |
| IPI00166392 | Immunoglobulin superfamily member 4                                                | R.YLEVQYKQVHIQM*TYPLQGLTR.E            | 2 | 4.03 | 0.59 | -3.95 |
| IPI00166392 | Immunoglobulin superfamily member 4                                                | R.YLEVQYKQVHIQM*TYPLQGLTR.E            | 3 | 5.85 | 0.50 | -6.84 |
| IPI00166392 | Immunoglobulin superfamily member 4                                                | R.YLEVQYKQVHIQM*TYPLQGLTR.E            | 4 | 3.41 | 0.34 | -5.00 |
| IPI00166553 | Isoform 1 of Protein FAM19A2 precursor                                             | R.AAPSCVDASIVEQK.W                     | 2 | 3.77 | 0.41 | -3.05 |
| IPI00166613 | Isoform 1 of Putative polypeptide N-acetylgalactosaminyltransferase-like protein 1 | K.AGEDPYRQHAFNQLSDKLSRPI.R             | 3 | 5.49 | 0.34 | -3.74 |
| IPI00166613 | Isoform 1 of Putative polypeptide N-acetylgalactosaminyltransferase-like protein 1 | K.AGEDPYRQHAFNQLSDKLSRPI.R             | 4 | 5.85 | 0.43 | -2.54 |

|             |                                                                                    |                                        |   |      |      |       |
|-------------|------------------------------------------------------------------------------------|----------------------------------------|---|------|------|-------|
| IPI00166613 | Isoform 1 of Putative polypeptide N-acetylgalactosaminyltransferase-like protein 1 | R.QHAFNQLESCLKSPDRPI.R                 | 2 | 3.43 | 0.35 | -2.30 |
| IPI00166619 | Isoform 2 of Putative transporter SVOPL                                            | K.YRGYMLPLSQVFWLAGSLLIIGLASVIIPTIGWR.W | 3 | 2.43 | 0.27 | -0.25 |
| IPI00166622 | similar to CG14446-PA                                                              | G.HGVTDNQR.F                           | 2 | 2.90 | 0.39 | -1.25 |
| IPI00166622 | similar to CG14446-PA                                                              | K.DFSLAATSQDEAVVSVQPR.S                | 2 | 2.62 | 0.26 | -0.78 |
| IPI00166622 | similar to CG14446-PA                                                              | K.KGVNLSAQTR.E                         | 2 | 3.14 | 0.30 | -3.42 |
| IPI00166622 | similar to CG14446-PA                                                              | K.LEEPHVATLQDSR.V                      | 2 | 3.80 | 0.44 | -2.72 |
| IPI00166622 | similar to CG14446-PA                                                              | K.LEEPHVATLQDSR.V                      | 3 | 4.12 | 0.34 | -0.53 |
| IPI00166622 | similar to CG14446-PA                                                              | K.SILAVGVGNVR.V                        | 1 | 1.78 | 0.11 | -2.93 |
| IPI00166622 | similar to CG14446-PA                                                              | K.SILAVGVGNVR.V                        | 2 | 2.97 | 0.29 | -2.41 |
| IPI00166622 | similar to CG14446-PA                                                              | K.SM*DQPEGTPVELYTYVHPGNER.G            | 3 | 2.72 | 0.14 | -2.08 |
| IPI00166622 | similar to CG14446-PA                                                              | K.STDEDVIKVSER.C                       | 2 | 3.16 | 0.29 | -1.99 |
| IPI00166622 | similar to CG14446-PA                                                              | K.TITVLDK.V                            | 2 | 1.88 | 0.10 | -2.35 |
| IPI00166622 | similar to CG14446-PA                                                              | K.VVPLDLM*LTSNFLGPTNK.F                | 2 | 3.58 | 0.25 | -3.95 |
| IPI00166622 | similar to CG14446-PA                                                              | R.AETSFFLK.E                           | 1 | 1.75 | 0.11 | -2.26 |
| IPI00166622 | similar to CG14446-PA                                                              | R.AQDSAQLSEL.R.L                       | 2 | 4.03 | 0.28 | -2.37 |
| IPI00166622 | similar to CG14446-PA                                                              | R.EVGM*TTIQVLSPLSDSILA.EK.T            | 2 | 5.49 | 0.41 | -4.37 |
| IPI00166622 | similar to CG14446-PA                                                              | R.EVGM*TTIQVLSPLSDSILA.EK.T            | 3 | 5.46 | 0.38 | -3.85 |
| IPI00166622 | similar to CG14446-PA                                                              | R.FSSLPPYLPVSYHILR.A                   | 3 | 2.02 | 0.13 | -2.96 |
| IPI00166622 | similar to CG14446-PA                                                              | R.KSILAVGVGNVR.V                       | 2 | 2.90 | 0.22 | -2.84 |
| IPI00166622 | similar to CG14446-PA                                                              | R.KSILAVGVGNVR.V                       | 3 | 3.56 | 0.11 | -3.94 |
| IPI00166622 | similar to CG14446-PA                                                              | R.LAGEGQLQNIPIDFTNFAHVDPK.A            | 3 | 5.69 | 0.43 | -4.05 |
| IPI00166622 | similar to CG14446-PA                                                              | R.LPLQIEVSDTELSQIK.G                   | 2 | 5.30 | 0.42 | -3.76 |
| IPI00166622 | similar to CG14446-PA                                                              | R.TGQDGHLYGSSPVER.E                    | 3 | 3.09 | 0.34 | -1.08 |
| IPI00166622 | similar to CG14446-PA                                                              | R.VDM*TIAEACQK.S                       | 2 | 3.70 | 0.35 | -1.76 |
| IPI00166622 | similar to CG14446-PA                                                              | R.VESFFTYK.T                           | 1 | 1.98 | 0.25 | -3.32 |
| IPI00166622 | similar to CG14446-PA                                                              | R.VESFFTYK.T                           | 2 | 2.76 | 0.28 | -1.49 |
| IPI00166622 | similar to CG14446-PA                                                              | R.WPVVVAEGEGQGGLIR.V                   | 2 | 4.80 | 0.38 | -4.07 |
| IPI00166622 | similar to CG14446-PA                                                              | W.GVKQEVGSGGK.H                        | 2 | 3.17 | 0.23 | -1.05 |
| IPI00166729 | alpha-2-glycoprotein 1, zinc                                                       | K.AREDIFM*ETLK.D                       | 2 | 2.98 | 0.18 |       |
| IPI00166729 | alpha-2-glycoprotein 1, zinc                                                       | K.AYLEEECPATLR.K                       | 2 | 4.41 | 0.38 |       |
| IPI00166729 | alpha-2-glycoprotein 1, zinc                                                       | K.CLAYDFYPGK.I                         | 1 | 2.87 | 0.26 |       |
| IPI00166729 | alpha-2-glycoprotein 1, zinc                                                       | K.CLAYDFYPGK.I                         | 2 | 3.57 | 0.36 |       |
| IPI00166729 | alpha-2-glycoprotein 1, zinc                                                       | K.EIPAWVPFDPAQITK.Q                    | 2 | 3.04 | 0.31 |       |
| IPI00166729 | alpha-2-glycoprotein 1, zinc                                                       | K.HVEDVPAFQALGSLNDLQFFR.Y              | 2 | 5.77 | 0.42 |       |
| IPI00166729 | alpha-2-glycoprotein 1, zinc                                                       | K.HVEDVPAFQALGSLNDLQFFR.Y              | 3 | 2.30 | 0.13 | -5.40 |
| IPI00166729 | alpha-2-glycoprotein 1, zinc                                                       | K.NILDRQDPPSVVVTSHQAPGEK.K             | 2 | 4.63 | 0.39 |       |
| IPI00166729 | alpha-2-glycoprotein 1, zinc                                                       | K.NILDRQDPPSVVVTSHQAPGEK.K             | 3 | 6.55 | 0.43 |       |
| IPI00166729 | alpha-2-glycoprotein 1, zinc                                                       | K.NILDRQDPPSVVVTSHQAPGEK.K             | 3 | 5.42 | 0.42 |       |
| IPI00166729 | alpha-2-glycoprotein 1, zinc                                                       | K.QKWEAEPVYVQR.A                       | 2 | 2.35 | 0.21 |       |
| IPI00166729 | alpha-2-glycoprotein 1, zinc                                                       | K.YYYDGKDYIEFNK.E                      | 1 | 3.50 | 0.33 |       |
| IPI00166729 | alpha-2-glycoprotein 1, zinc                                                       | K.YYYDGKDYIEFNK.E                      | 2 | 4.53 | 0.32 |       |

|             |                                               |                                   |   |      |      |       |
|-------------|-----------------------------------------------|-----------------------------------|---|------|------|-------|
| IPI00166729 | alpha-2-glycoprotein 1, zinc                  | K.YYYDGKDYIEFNK.E                 | 3 | 2.68 | 0.23 |       |
| IPI00166729 | alpha-2-glycoprotein 1, zinc                  | K.YYYDGKDYIEFNKEIPAWVPFDPAAQITK.Q | 3 | 5.32 | 0.31 |       |
| IPI00166729 | alpha-2-glycoprotein 1, zinc                  | R.AGEVQPELR.G                     | 2 | 3.54 | 0.09 |       |
| IPI00166729 | alpha-2-glycoprotein 1, zinc                  | R.AKAYLEEECPATLR.K                | 2 | 4.88 | 0.41 |       |
| IPI00166729 | alpha-2-glycoprotein 1, zinc                  | R.AKAYLEEECPATLRK.Y               | 2 | 4.80 | 0.30 |       |
| IPI00166729 | alpha-2-glycoprotein 1, zinc                  | R.AKAYLEEECPATLRK.Y               | 3 | 3.76 | 0.33 |       |
| IPI00166729 | alpha-2-glycoprotein 1, zinc                  | R.QDPPSVVVTSHQAPGEK.K             | 2 | 1.75 | 0.18 |       |
| IPI00166729 | alpha-2-glycoprotein 1, zinc                  | R.QVEGM*EDWKQDSQLQK.A             | 2 | 3.40 | 0.24 |       |
| IPI00166729 | alpha-2-glycoprotein 1, zinc                  | R.QVEGMEDWKQDSQLQK.A              | 2 | 3.02 | 0.31 |       |
| IPI00166729 | alpha-2-glycoprotein 1, zinc                  | R.YSLTYIYTGLSK.H                  | 1 | 3.00 | 0.40 |       |
| IPI00166729 | alpha-2-glycoprotein 1, zinc                  | R.YSLTYIYTGLSK.H                  | 2 | 4.82 | 0.43 |       |
| IPI00166766 | hypothetical protein LOC146556 isoform 2      | A.TIADLILSALER.A                  | 2 | 3.82 | 0.33 | -3.11 |
| IPI00166766 | hypothetical protein LOC146556 isoform 2      | K.AIQYQQHFSR.R                    | 1 | 2.66 | 0.22 | -3.36 |
| IPI00166766 | hypothetical protein LOC146556 isoform 2      | K.AIQYQQHFSR.R                    | 2 | 3.76 | 0.41 | -2.81 |
| IPI00166766 | hypothetical protein LOC146556 isoform 2      | K.ATIADLILSALER.A                 | 1 | 2.12 | 0.31 | -2.10 |
| IPI00166766 | hypothetical protein LOC146556 isoform 2      | K.ATIADLILSALER.A                 | 2 | 4.11 | 0.38 | -5.84 |
| IPI00166766 | hypothetical protein LOC146556 isoform 2      | K.ATIADLILSALER.A                 | 3 | 5.66 | 0.25 | -4.53 |
| IPI00166766 | hypothetical protein LOC146556 isoform 2      | K.WAQEPLLQPLSLR.V                 | 2 | 3.92 | 0.37 | -5.08 |
| IPI00166766 | hypothetical protein LOC146556 isoform 2      | R.AEAIGYAYPTR.D                   | 1 | 2.57 | 0.21 | -3.68 |
| IPI00166766 | hypothetical protein LOC146556 isoform 2      | R.AEAIGYAYPTR.D                   | 2 | 3.21 | 0.30 | -2.78 |
| IPI00166766 | hypothetical protein LOC146556 isoform 2      | R.ATVFLEQR.L                      | 1 | 2.10 | 0.06 | -2.47 |
| IPI00166766 | hypothetical protein LOC146556 isoform 2      | R.ATVFLEQR.L                      | 2 | 2.85 | 0.22 | -2.21 |
| IPI00166766 | hypothetical protein LOC146556 isoform 2      | R.EFQLTLQPGFWK.L                  | 2 | 3.75 | 0.30 | -4.85 |
| IPI00166766 | hypothetical protein LOC146556 isoform 2      | R.GCTQGPLQQSQDYINLFCANM*M*DLNR.R  | 3 | 5.65 | 0.48 | -4.23 |
| IPI00166766 | hypothetical protein LOC146556 isoform 2      | R.GCTQGPLQQSQDYINLFCANM*M*DLNRR.A | 3 | 3.13 | 0.24 | -3.67 |
| IPI00166766 | hypothetical protein LOC146556 isoform 2      | R.LPEINLDGM*VGVV.V                | 2 | 4.71 | 0.41 | -4.78 |
| IPI00166766 | hypothetical protein LOC146556 isoform 2      | R.RAEAIGYAYPTR.D                  | 2 | 4.43 | 0.45 | -1.79 |
| IPI00166766 | hypothetical protein LOC146556 isoform 2      | R.VGM*LGEKLEAAIQR.S               | 3 | 4.37 | 0.27 | -2.14 |
| IPI00166766 | hypothetical protein LOC146556 isoform 2      | S.SSLPGLDTAESK.A                  | 1 | 2.46 | 0.30 | -4.30 |
| IPI00166766 | hypothetical protein LOC146556 isoform 2      | S.SSLPGLDTAESKATIADLILSALER.A     | 2 | 5.02 | 0.50 | -3.96 |
| IPI00166766 | hypothetical protein LOC146556 isoform 2      | S.SSLPGLDTAESKATIADLILSALER.A     | 3 | 3.92 | 0.27 | -5.01 |
| IPI00166766 | hypothetical protein LOC146556 isoform 2      | T.IADLILSALER.A                   | 2 | 3.12 | 0.37 | -4.70 |
| IPI00166766 | hypothetical protein LOC146556 isoform 2      | W.AQEPLLQPLSLR.V                  | 2 | 3.06 | 0.32 | -2.50 |
| IPI00166776 | Protein CREG2 precursor                       | K.NIVDPEDPR.C                     | 2 | 2.20 | 0.33 | -2.56 |
| IPI00166807 | Isoform 3 of Oxidation resistance protein 1   | R.IRDAGNDSASTAPR.S                | 3 | 2.22 | 0.11 | -2.37 |
| IPI00166817 | Zinc finger protein 561                       | -.M*AAIYLSR.G                     | 2 | 2.00 | 0.07 | 2.13  |
| IPI00166865 | CDGSH iron sulfur domain-containing protein 2 | -.M*VLESVAR.I                     | 2 | 1.78 | 0.05 | 3.10  |
| IPI00166892 | DPPY splice variant c                         | K.DVVYK.N                         | 1 | 1.46 | 0.08 | -3.57 |
| IPI00166892 | DPPY splice variant c                         | K.ILHIDDYELPLQLSLPK.D             | 3 | 2.94 | 0.16 | -3.67 |
| IPI00166892 | DPPY splice variant c                         | K.LYASAFSER.Y                     | 2 | 2.98 | 0.29 | -1.06 |
| IPI00166892 | DPPY splice variant c                         | R.FTGALYPK.G                      | 2 | 1.95 | 0.11 | -0.09 |
| IPI00166892 | DPPY splice variant c                         | R.KDFVLHDPEAR.W                   | 3 | 2.84 | 0.08 | -0.63 |

|             |                                                                             |                                              |   |      |      |       |
|-------------|-----------------------------------------------------------------------------|----------------------------------------------|---|------|------|-------|
| IPI00166892 | DPPY splice variant c                                                       | R.LSLEDLFR.K                                 | 2 | 2.19 | 0.17 | -2.40 |
| IPI00166892 | DPPY splice variant c                                                       | R.QLYASTEGLLNR.Q                             | 2 | 2.45 | 0.18 | -3.97 |
| IPI00167006 | Uncharacterized protein C13orf26                                            | G.LVPSVLHSLRNQEHTKK.Q                        | 3 | 3.57 | 0.28 | -4.36 |
| IPI00167089 | Isoform 2 of Activated CDC42 kinase 1                                       | R.EACASDPRLHPVSSR.T                          | 3 | 3.01 | 0.15 |       |
| IPI00167093 | complement factor H-related 1                                               | K.CGPPPIDNGDITSFPLSVYAPASSVEYQCQNLYQLEGNKR.I | 3 | 5.17 | 0.49 | -3.33 |
| IPI00167093 | complement factor H-related 1                                               | K.INHGILYDEEK.Y                              | 2 | 3.57 | 0.37 | -3.89 |
| IPI00167093 | complement factor H-related 1                                               | K.YKPFQVPTGEVFFYYSCEYNFVSPSK.S               | 3 | 4.07 | 0.27 |       |
| IPI00167093 | complement factor H-related 1                                               | R.EIM*ENYNIALR.W                             | 2 | 2.73 | 0.35 | -4.22 |
| IPI00167093 | complement factor H-related 1                                               | R.LCFFPFVENGHSESSGQTHLEGDTVQIICNTGYR.L       | 3 | 5.60 | 0.33 |       |
| IPI00167093 | complement factor H-related 1                                               | R.LQNNENNISCVER.G                            | 2 | 3.88 | 0.44 | -0.87 |
| IPI00167093 | complement factor H-related 1                                               | R.NGQWSEPPKCLHPCVISR.E                       | 3 | 3.60 | 0.35 |       |
| IPI00167093 | complement factor H-related 1                                               | R.QMSKYPSEGER.V                              | 2 | 2.87 | 0.22 |       |
| IPI00167093 | complement factor H-related 1                                               | R.STDTSCVNPPTVQNAHILSR.Q                     | 2 | 4.34 | 0.38 |       |
| IPI00167093 | complement factor H-related 1                                               | R.STDTSCVNPPTVQNAHILSR.Q                     | 3 | 4.07 | 0.31 |       |
| IPI00167093 | complement factor H-related 1                                               | R.TGESAEFVCKR.R                              | 2 | 2.87 | 0.29 |       |
| IPI00167093 | complement factor H-related 1                                               | R.TGESAEFVCKR.G                              | 2 | 3.12 | 0.23 |       |
| IPI00167093 | complement factor H-related 1                                               | R.TGESAEFVCKR.G                              | 3 | 2.46 | 0.18 |       |
| IPI00167093 | complement factor H-related 1                                               | R.TTCWDGKLEYPTCAK.R                          | 2 | 4.43 | 0.42 |       |
| IPI00167137 | Isoform 3 of SLAM family member 7 precursor                                 | K.YGLLHCGNTEKDGKSPLTAHDAR.H                  | 3 | 2.75 | 0.06 | -1.61 |
| IPI00167154 | Uncharacterized protein MAPKBP1                                             | R.AQESVGFDPAPAPANPGR.R                       | 3 | 2.43 | 0.10 | -3.69 |
| IPI00167215 | Isoform 1 of Hepatocyte cell adhesion molecule precursor                    | K.DKDSPETEENPAPEPR.S                         | 3 | 3.68 | 0.20 | -3.16 |
| IPI00167215 | Isoform 1 of Hepatocyte cell adhesion molecule precursor                    | K.DSPETEENPAPEPR.S                           | 2 | 2.86 | 0.33 | -0.86 |
| IPI00167215 | Isoform 1 of Hepatocyte cell adhesion molecule precursor                    | R.DKPVTVVQSIGTEVIGTLRPDYR.D                  | 3 | 2.66 | 0.10 | -2.53 |
| IPI00167215 | Isoform 1 of Hepatocyte cell adhesion molecule precursor                    | R.DKPVTVVQSIGTEVIGTLRPDYRDR.I                | 4 | 2.49 | 0.12 | -3.71 |
| IPI00167215 | Isoform 1 of Hepatocyte cell adhesion molecule precursor                    | R.LIHGTVGK.S                                 | 1 | 1.83 | 0.08 | -3.97 |
| IPI00167215 | Isoform 1 of Hepatocyte cell adhesion molecule precursor                    | R.LIHGTVGK.S                                 | 2 | 2.18 | 0.10 | -5.40 |
| IPI00167215 | Isoform 1 of Hepatocyte cell adhesion molecule precursor                    | R.SATEPGPPGYSVSPAVPGR.S                      | 2 | 4.38 | 0.54 | -2.20 |
| IPI00167215 | Isoform 1 of Hepatocyte cell adhesion molecule precursor                    | Y.ILKDKDSPETEENPAPEPR.S                      | 3 | 4.79 | 0.44 | -2.72 |
| IPI00167254 | Isoform 4 of Inactive phospholipase D5                                      | F.SAVDIM*GEDEDGLSEK.N                        | 2 | 3.98 | 0.49 | -4.35 |
| IPI00167560 | PAP-associated domain-containing protein 4                                  | R.GRKRLSDEKNPLDGK.R                          | 2 | 2.51 | 0.11 |       |
| IPI00167619 | Leucine-rich repeat and transmembrane domain-containing protein 2 precursor | R.LDLSNNFLDR.L                               | 2 | 3.46 | 0.33 | -3.43 |
| IPI00167638 | Isoform 1 of GTP-binding protein 10                                         | K.DRYPRKRFVAGVGANSK.I                        | 3 | 2.47 | 0.06 | -5.47 |
| IPI00167710 | Isoform 1 of Fibulin-7 precursor                                            | K.TISFHLYSLPSNLK.T                           | 2 | 3.75 | 0.43 | -4.91 |

|             |                                                                                    |                                           |   |      |      |       |
|-------------|------------------------------------------------------------------------------------|-------------------------------------------|---|------|------|-------|
| IPI00167710 | Isoform 1 of Fibulin-7 precursor                                                   | K.TPITLFR.M                               | 2 | 2.02 | 0.13 | -2.42 |
| IPI00167710 | Isoform 1 of Fibulin-7 precursor                                                   | R.FGIVGGNSR.G                             | 1 | 1.23 | 0.21 | -0.94 |
| IPI00167710 | Isoform 1 of Fibulin-7 precursor                                                   | R.M*ATASAPGR.A                            | 2 | 2.42 | 0.18 | -4.54 |
| IPI00167941 | Midasin                                                                            | R.LNAALATPAKEM*GM*GNVERCR.G               | 2 | 2.28 | 0.13 |       |
| IPI00168404 | Zinc finger and BTB domain containing 34                                           | R.METTPSKALRSRLQEEGHSDR.G                 | 3 | 2.61 | 0.11 | -0.10 |
| IPI00168479 | Isoform 1 of Apolipoprotein A-I-binding protein precursor                          | K.GDVREPFHSILSVLK.G                       | 2 | 2.74 | 0.19 | -5.26 |
| IPI00168479 | Isoform 1 of Apolipoprotein A-I-binding protein precursor                          | K.GDVREPFHSILSVLK.G                       | 3 | 2.08 | 0.20 | -3.05 |
| IPI00168479 | Isoform 1 of Apolipoprotein A-I-binding protein precursor                          | K.GDVREPFHSILSVLK.G                       | 4 | 2.57 | 0.17 | -2.92 |
| IPI00168479 | Isoform 1 of Apolipoprotein A-I-binding protein precursor                          | K.GLTVPIASIDIPSGWDVEK.G                   | 2 | 4.02 | 0.35 | -4.09 |
| IPI00168479 | Isoform 1 of Apolipoprotein A-I-binding protein precursor                          | K.GLTVPIASIDIPSGWDVEKGNAGGIQPDLLISLTAPK.K | 3 | 4.54 | 0.46 | -5.05 |
| IPI00168479 | Isoform 1 of Apolipoprotein A-I-binding protein precursor                          | K.GLTVPIASIDIPSGWDVEKGNAGGIQPDLLISLTAPK.K | 4 | 3.25 | 0.16 | -4.02 |
| IPI00168479 | Isoform 1 of Apolipoprotein A-I-binding protein precursor                          | K.GNAGGIQPDLLISLTAPK.K                    | 2 | 3.76 | 0.42 | -3.99 |
| IPI00168479 | Isoform 1 of Apolipoprotein A-I-binding protein precursor                          | K.LFGYEPTIYYPK.R                          | 2 | 3.76 | 0.35 | -3.93 |
| IPI00168479 | Isoform 1 of Apolipoprotein A-I-binding protein precursor                          | K.SATQFTGR.Y                              | 2 | 2.02 | 0.39 | -1.93 |
| IPI00168479 | Isoform 1 of Apolipoprotein A-I-binding protein precursor                          | R.SPPTVLVICGPGNNGDGLVCAR.H                | 2 | 5.81 | 0.63 | -2.98 |
| IPI00168479 | Isoform 1 of Apolipoprotein A-I-binding protein precursor                          | R.SPPTVLVICGPGNNGDGLVCAR.H                | 3 | 2.84 | 0.19 | -2.95 |
| IPI00168520 | Isoform 2 of Matrilin-2 precursor                                                  | R.GYTLDPNGK.T                             | 2 | 1.63 | 0.27 | -2.93 |
| IPI00168520 | Isoform 2 of Matrilin-2 precursor                                                  | R.M*EALENR.L                              | 2 | 2.50 | 0.08 | -3.21 |
| IPI00168520 | Isoform 2 of Matrilin-2 precursor                                                  | R.SVNTHDYAK.V                             | 2 | 2.45 | 0.28 | -1.49 |
| IPI00168520 | Isoform 2 of Matrilin-2 precursor                                                  | R.VIM*IVTDGRPQDSVAEVAAK.A                 | 2 | 2.86 | 0.37 | -2.23 |
| IPI00168626 | Isoform 1 of Putative polypeptide N-acetylgalactosaminyltransferase-like protein 4 | K.IIERLDHLENIK.Q                          | 2 | 3.19 | 0.19 | -3.62 |
| IPI00168626 | Isoform 1 of Putative polypeptide N-acetylgalactosaminyltransferase-like protein 4 | K.IIERLDHLENIK.Q                          | 3 | 3.26 | 0.24 | -2.44 |
| IPI00168626 | Isoform 1 of Putative polypeptide N-acetylgalactosaminyltransferase-like protein 4 | K.LEEDKGDTLK.I                            | 2 | 2.54 | 0.23 | -1.12 |
| IPI00168626 | Isoform 1 of Putative polypeptide N-acetylgalactosaminyltransferase-like protein 4 | K.LTEYVDKVNQKPGFIK.V                      | 2 | 4.34 | 0.44 | -3.97 |
| IPI00168626 | Isoform 1 of Putative polypeptide N-acetylgalactosaminyltransferase-like protein 4 | K.LTEYVDKVNQKPGFIK.V                      | 3 | 2.88 | 0.34 | -3.85 |



|             |                                                                                    |                                  |   |      |      |       |
|-------------|------------------------------------------------------------------------------------|----------------------------------|---|------|------|-------|
| IPI00168626 | Isoform 1 of Putative polypeptide N-acetylgalactosaminyltransferase-like protein 4 | R.LIECSYAK.A                     | 1 | 1.35 | 0.09 | -2.75 |
| IPI00168626 | Isoform 1 of Putative polypeptide N-acetylgalactosaminyltransferase-like protein 4 | R.LIECSYAK.A                     | 2 | 2.25 | 0.07 | -1.57 |
| IPI00168626 | Isoform 1 of Putative polypeptide N-acetylgalactosaminyltransferase-like protein 4 | R.M*YSDIIAYGVLQNSLK.T            | 2 | 6.05 | 0.51 | -3.24 |
| IPI00168626 | Isoform 1 of Putative polypeptide N-acetylgalactosaminyltransferase-like protein 4 | R.SPALIGCFIVDR.Q                 | 2 | 3.40 | 0.37 | -4.37 |
| IPI00168626 | Isoform 1 of Putative polypeptide N-acetylgalactosaminyltransferase-like protein 4 | R.WYLVSVYPEM*R.M                 | 2 | 3.00 | 0.23 | -4.76 |
| IPI00168806 | Isoform 1 of Myeloid/lymphoid or mixed-lineage leukemia protein 3 homolog          | R.CTNIYHFTCAIKAQCM*FFK.D         | 2 | 1.09 | 0.07 | -5.82 |
| IPI00168847 | Isoform 2 of Hyaluronidase-1 precursor                                             | R.ALVQAQHPDWPAPQVEAVAQDQFQGAAR.A | 3 | 3.58 | 0.17 |       |
| IPI00168847 | Isoform 2 of Hyaluronidase-1 precursor                                             | R.ALYPsiYM*PAVLEGTGK.S           | 2 | 3.50 | 0.40 |       |
| IPI00168847 | Isoform 2 of Hyaluronidase-1 precursor                                             | R.AWM*AGTLQLGR.A                 | 2 | 2.94 | 0.07 |       |
| IPI00168862 | Conserved hypothetical protein                                                     | -.M*KKKHdGIVYETK.E               | 2 | 2.65 | 0.14 | -1.70 |
| IPI00168866 | MAM domain containing glycosylphosphatidylinositol anchor 1                        | K.GQLLEYILTDLR.V                 | 2 | 4.13 | 0.34 | -3.68 |
| IPI00168866 | MAM domain containing glycosylphosphatidylinositol anchor 1                        | K.GQLLEYILTDLRVPHSYEVR.L         | 3 | 4.11 | 0.38 | -6.21 |
| IPI00168866 | MAM domain containing glycosylphosphatidylinositol anchor 1                        | R.FKGQLLPPPPVVPAAAEAPDHAELR.L    | 3 | 4.17 | 0.31 | -3.25 |
| IPI00168866 | MAM domain containing glycosylphosphatidylinositol anchor 1                        | R.VDKEAALLPSGLPLEETPDGK.L        | 3 | 4.21 | 0.33 | -2.99 |
| IPI00168866 | MAM domain containing glycosylphosphatidylinositol anchor 1                        | R.VDKEAALLPSGLPLEETPDGKLR.L      | 3 | 3.46 | 0.34 | -2.77 |
| IPI00168866 | MAM domain containing glycosylphosphatidylinositol anchor 1                        | R.VDVQYLDEPM*LTVHQTVDVR.G        | 3 | 2.86 | 0.16 | -2.97 |
| IPI00168884 | Renin receptor precursor                                                           | K.DHSPDLYSLELAGLDEIGKR.Y         | 3 | 4.05 | 0.55 | -1.85 |
| IPI00168884 | Renin receptor precursor                                                           | K.DHSPDLYSLELAGLDEIGKR.Y         | 4 | 3.23 | 0.23 | -0.83 |
| IPI00168884 | Renin receptor precursor                                                           | K.FADDM*YSLYGGNAVVELVTVK.S       | 2 | 3.58 | 0.16 |       |
| IPI00168884 | Renin receptor precursor                                                           | K.SFDTSLIR.K                     | 2 | 2.81 | 0.18 | -2.26 |
| IPI00168884 | Renin receptor precursor                                                           | R.IPDVAALSMGFsvK.E               | 2 | 3.71 | 0.32 |       |
| IPI00168884 | Renin receptor precursor                                                           | R.LFQENSVLSSPLNLSR.N             | 2 | 2.84 | 0.34 | -4.32 |
| IPI00168884 | Renin receptor precursor                                                           | R.NNEVDLLFLSELQVLHDISSLLSR.H     | 3 | 3.98 | 0.21 |       |
| IPI00168884 | Renin receptor precursor                                                           | R.YGEDSEQFRDASK.I                | 3 | 2.16 | 0.13 | 0.78  |
| IPI00168885 | Isoform 1 of Putative ATP-dependent RNA helicase DHX57                             | K.RYDWQAKSVHAENGK.I              | 2 | 2.22 | 0.27 |       |
| IPI00168920 | collagen, type XXIV, alpha 1                                                       | R.EGIIGPTGR.T                    | 2 | 1.58 | 0.16 |       |
| IPI00168920 | collagen, type XXIV, alpha 1                                                       | R.GIPGPHGNPGLPGLPGPKGPK.G        | 2 | 1.89 | 0.17 |       |
| IPI00168921 | Putative polypeptide N-acetylgalactosaminyltransferase-like protein 3              | K.EGFLHLGALGTTLLPDTR.C           | 3 | 3.52 | 0.31 | -2.14 |

|             |                                                                       |                                         |   |      |      |       |
|-------------|-----------------------------------------------------------------------|-----------------------------------------|---|------|------|-------|
| IPI00168921 | Putative polypeptide N-acetylgalactosaminyltransferase-like protein 3 | R.SGDADFHEIRPR.A                        | 3 | 2.51 | 0.20 | -4.10 |
| IPI00168921 | Putative polypeptide N-acetylgalactosaminyltransferase-like protein 3 | R.VILPSIDNIKQDNFEVQR.Y                  | 3 | 1.96 | 0.13 | -2.58 |
| IPI00169115 | Olfactory receptor OR9-8                                              | R.NISFSGCAVQMFFGFAM*GSTECLLLGM*M*AFDR.Y | 3 | 2.91 | 0.11 |       |
| IPI00169259 | Small VCP/p97-interacting protein                                     | R.GILDVQSVQEK.R                         | 2 | 3.39 | 0.28 | -4.46 |
| IPI00169285 | Putative phospholipase B-like 2 precursor                             | K.GLEDSYEGR.V                           | 2 | 2.84 | 0.36 | -2.06 |
| IPI00169285 | Putative phospholipase B-like 2 precursor                             | R.VLTILEQIPGM*VVVADKTSELYQK.T           | 3 | 4.29 | 0.34 | -1.30 |
| IPI00169285 | Putative phospholipase B-like 2 precursor                             | R.VLTILEQIPGMVVVADKTSELYQK.T            | 3 | 2.69 | 0.11 | -3.94 |
| IPI00169331 | Phosphatidylcholine:ceramide cholinephosphotransferase 2              | K.KYSRVQK.I                             | 2 | 2.70 | 0.14 |       |
| IPI00169383 | Phosphoglycerate kinase 1                                             | K.ACANPAAGSVILLENLR.F                   | 2 | 4.96 | 0.46 | -3.84 |
| IPI00169383 | Phosphoglycerate kinase 1                                             | K.AEPAKIEAFR.A                          | 2 | 2.49 | 0.10 | -3.23 |
| IPI00169383 | Phosphoglycerate kinase 1                                             | K.ALESPERPFLLAILGGAK.V                  | 3 | 3.19 | 0.34 | -2.49 |
| IPI00169383 | Phosphoglycerate kinase 1                                             | K.ALM*DEVVK.A                           | 2 | 2.65 | 0.10 | -2.72 |
| IPI00169383 | Phosphoglycerate kinase 1                                             | K.DVLFLKDCVGPVEVK.A                     | 3 | 2.95 | 0.21 | -1.88 |
| IPI00169383 | Phosphoglycerate kinase 1                                             | K.ELNYFAK.A                             | 2 | 1.45 | 0.20 | -2.85 |
| IPI00169383 | Phosphoglycerate kinase 1                                             | K.ITLPVDFVTADKFDENAK.T                  | 2 | 4.54 | 0.49 | -4.00 |
| IPI00169383 | Phosphoglycerate kinase 1                                             | K.KYAEAVTR.A                            | 2 | 1.91 | 0.16 | -2.32 |
| IPI00169383 | Phosphoglycerate kinase 1                                             | K.LGDVYVNDAFGTAHR.A                     | 2 | 4.08 | 0.49 | -3.82 |
| IPI00169383 | Phosphoglycerate kinase 1                                             | K.LGDVYVNDAFGTAHR.A                     | 3 | 3.83 | 0.44 | -1.30 |
| IPI00169383 | Phosphoglycerate kinase 1                                             | K.LTLDKLDVK.G                           | 2 | 2.25 | 0.10 | -0.89 |
| IPI00169383 | Phosphoglycerate kinase 1                                             | K.NNQITNNQR.I                           | 2 | 2.35 | 0.08 | -1.61 |
| IPI00169383 | Phosphoglycerate kinase 1                                             | K.QIVWNGPVGVFWEAFAR.G                   | 2 | 4.74 | 0.55 | -3.28 |
| IPI00169383 | Phosphoglycerate kinase 1                                             | K.QIVWNGPVGVFWEAFAR.G                   | 3 | 4.98 | 0.37 | -3.86 |
| IPI00169383 | Phosphoglycerate kinase 1                                             | K.SLLGKDVFLK.D                          | 3 | 2.06 | 0.11 | -3.04 |
| IPI00169383 | Phosphoglycerate kinase 1                                             | K.SVVLM*SHLGRPDGVPM*PDKYSLEPVAVELK.S    | 4 | 4.52 | 0.44 | -1.89 |
| IPI00169383 | Phosphoglycerate kinase 1                                             | K.VKAEPKIEAFR.A                         | 2 | 2.64 | 0.27 | -3.58 |
| IPI00169383 | Phosphoglycerate kinase 1                                             | K.VLNNM*EIGTSLFDEEGAK.I                 | 2 | 4.86 | 0.45 | -3.28 |
| IPI00169383 | Phosphoglycerate kinase 1                                             | K.YAEAVTR.A                             | 1 | 2.06 | 0.07 | -3.57 |
| IPI00169383 | Phosphoglycerate kinase 1                                             | K.YAEAVTR.A                             | 2 | 2.47 | 0.07 | -4.42 |
| IPI00169383 | Phosphoglycerate kinase 1                                             | R.VDFNVPM*K.N                           | 2 | 2.54 | 0.19 | -2.61 |
| IPI00169383 | Phosphoglycerate kinase 1                                             | R.VDFNVPM*KNNQITNNQR.I                  | 3 | 3.01 | 0.25 | -1.70 |
| IPI00169426 | Isoform 2 of Cytosolic 5'-nucleotidase 1B                             | K.LPSSSTSSR.T                           | 1 | 1.75 | 0.17 | -1.71 |
| IPI00170635 | Secreted and transmembrane protein 1 precursor                        | R.AHGQESAIFNEVAPGYFSR.D                 | 2 | 5.43 | 0.62 | -4.31 |
| IPI00170635 | Secreted and transmembrane protein 1 precursor                        | R.AHGQESAIFNEVAPGYFSR.D                 | 3 | 3.97 | 0.33 | -3.85 |
| IPI00170692 | Vesicle-associated membrane protein-associated protein A              | K.EAKPELM*DSK.L                         | 2 | 1.71 | 0.13 | -2.71 |
| IPI00170692 | Vesicle-associated membrane protein-associated protein A              | K.FKGPFTDVVTTNLK.L                      | 2 | 4.04 | 0.37 | -3.84 |
| IPI00170766 | Isoform 2 of Protein CASC5                                            | K.KTCTTQHQLPK.M                         | 2 | 2.82 | 0.06 |       |

|             |                                                         |                                       |   |      |      |       |
|-------------|---------------------------------------------------------|---------------------------------------|---|------|------|-------|
| IPI00170814 | PTK7 protein tyrosine kinase 7 isoform b precursor      | R.VFTAGSEER.V                         | 2 | 2.39 | 0.21 | -1.28 |
| IPI00170814 | PTK7 protein tyrosine kinase 7 isoform b precursor      | R.VVLAPQDVVVAR.Y                      | 2 | 3.00 | 0.36 | -3.84 |
| IPI00171196 | keratin 13 isoform b                                    | R.LAADDFR.L                           | 2 | 2.47 | 0.23 | -3.76 |
| IPI00171199 | Isoform 2 of Proteasome subunit alpha type-3            | K.AVENSSTAIGIR.C                      | 2 | 2.17 | 0.08 | -1.98 |
| IPI00171199 | Isoform 2 of Proteasome subunit alpha type-3            | R.VFQVEYAM*K.A                        | 2 | 2.53 | 0.13 | -2.42 |
| IPI00171230 | Isoform 2 of ELKS/RAB6-interacting/CAST family member 1 | R.TNSTGGSSGSSVGGGSGK.T                | 2 | 2.30 | 0.11 |       |
| IPI00171410 | Isoform 1 of Uncharacterized protein C3orf21            | K.TNIRELFEEDSFLPGAIIGIAR.E            | 3 | 4.56 | 0.34 | -2.54 |
| IPI00171410 | Isoform 1 of Uncharacterized protein C3orf21            | R.DHGYSDFEAYFR.C                      | 2 | 2.45 | 0.28 | -5.04 |
| IPI00171410 | Isoform 1 of Uncharacterized protein C3orf21            | R.DHGYSDFEAYFR.C                      | 3 | 3.51 | 0.22 | -0.92 |
| IPI00171410 | Isoform 1 of Uncharacterized protein C3orf21            | R.ELFEEDSFLPGAIIGIAR.E                | 2 | 5.11 | 0.41 | -2.80 |
| IPI00171410 | Isoform 1 of Uncharacterized protein C3orf21            | R.ELFEEDSFLPGAIIGIAR.E                | 3 | 4.77 | 0.15 | -2.78 |
| IPI00171410 | Isoform 1 of Uncharacterized protein C3orf21            | R.ETFSSATKR.L                         | 2 | 1.84 | 0.14 | -2.37 |
| IPI00171410 | Isoform 1 of Uncharacterized protein C3orf21            | R.LLEPAQVQQLADK.Y                     | 2 | 3.16 | 0.26 | -3.02 |
| IPI00171410 | Isoform 1 of Uncharacterized protein C3orf21            | R.LLEPAQVQQLADKYHFR.G                 | 3 | 2.16 | 0.23 | -2.53 |
| IPI00171410 | Isoform 1 of Uncharacterized protein C3orf21            | R.VGGPPPEGLPGFNSGVM*LLNLEAM*R.Q       | 2 | 2.50 | 0.08 | -4.96 |
| IPI00171411 | Golgi phosphoprotein 2                                  | A.LSVSQENPEM*EGPER.D                  | 2 | 3.47 | 0.36 | -3.23 |
| IPI00171411 | Golgi phosphoprotein 2                                  | K.FSYDLSQCINQM*K.E                    | 2 | 4.00 | 0.44 | -2.78 |
| IPI00171411 | Golgi phosphoprotein 2                                  | K.GNVLGNSK.S                          | 1 | 1.90 | 0.23 | -2.91 |
| IPI00171411 | Golgi phosphoprotein 2                                  | K.IQSSHNFQLESVNK.L                    | 2 | 4.23 | 0.37 | -2.90 |
| IPI00171411 | Golgi phosphoprotein 2                                  | K.IQSSHNFQLESVNK.L                    | 3 | 3.71 | 0.36 | -5.24 |
| IPI00171411 | Golgi phosphoprotein 2                                  | K.IQSSHNFQLESVNKLYQDEK.A              | 3 | 4.51 | 0.38 | -1.79 |
| IPI00171411 | Golgi phosphoprotein 2                                  | K.KNEFQGELEK.Q                        | 2 | 2.57 | 0.15 | -3.19 |
| IPI00171411 | Golgi phosphoprotein 2                                  | K.KNEFQGELEK.Q                        | 3 | 3.35 | 0.07 | -4.16 |
| IPI00171411 | Golgi phosphoprotein 2                                  | K.RQVEKEETNEIQVVNEEPQR.D              | 3 | 5.29 | 0.35 | -3.48 |
| IPI00171411 | Golgi phosphoprotein 2                                  | K.RQVEKEETNEIQVVNEEPQR.D              | 4 | 3.23 | 0.24 | -3.37 |
| IPI00171411 | Golgi phosphoprotein 2                                  | K.RQVEKEETNEIQVVNEEPQRDR.L            | 3 | 3.68 | 0.20 | -3.13 |
| IPI00171411 | Golgi phosphoprotein 2                                  | K.RQVEKEETNEIQVVNEEPQRDR.L            | 4 | 3.43 | 0.18 | -2.06 |
| IPI00171411 | Golgi phosphoprotein 2                                  | R.DQLVIPDGQEEEQEAAGEGR.N              | 2 | 4.47 | 0.46 | -3.91 |
| IPI00171411 | Golgi phosphoprotein 2                                  | R.DQLVIPDGQEEEQEAAGEGR.N              | 3 | 3.57 | 0.41 | -2.33 |
| IPI00171411 | Golgi phosphoprotein 2                                  | R.DRLPQEPGREQVVEDRPVGGGR.G            | 3 | 3.19 | 0.17 | -3.48 |
| IPI00171411 | Golgi phosphoprotein 2                                  | R.DRLPQEPGREQVVEDRPVGGGR.G            | 4 | 2.60 | 0.13 | -1.96 |
| IPI00171411 | Golgi phosphoprotein 2                                  | R.DTINLLDQR.E                         | 1 | 2.89 | 0.22 | -4.33 |
| IPI00171411 | Golgi phosphoprotein 2                                  | R.DTINLLDQR.E                         | 2 | 3.56 | 0.20 | -2.62 |
| IPI00171411 | Golgi phosphoprotein 2                                  | R.DTINLLDQRE.K                        | 2 | 3.20 | 0.18 | -3.02 |
| IPI00171411 | Golgi phosphoprotein 2                                  | R.EQLDKIQSSHNFQLESVNK.L               | 2 | 4.60 | 0.50 | -3.38 |
| IPI00171411 | Golgi phosphoprotein 2                                  | R.EQLDKIQSSHNFQLESVNK.L               | 3 | 3.30 | 0.26 | -3.10 |
| IPI00171411 | Golgi phosphoprotein 2                                  | R.EQVVEDRPVGGGR.G                     | 2 | 1.68 | 0.05 | -2.28 |
| IPI00171411 | Golgi phosphoprotein 2                                  | R.GFGGAGELGQTPQVQAALSVSQENPEM*EGPER.D | 3 | 6.13 | 0.49 | -4.33 |
| IPI00171411 | Golgi phosphoprotein 2                                  | R.KFSYDLSQCINQM*K.E                   | 3 | 2.65 | 0.22 | -2.67 |

|             |                                                                      |                                      |   |      |      |       |
|-------------|----------------------------------------------------------------------|--------------------------------------|---|------|------|-------|
| IPI00171411 | Golgi phosphoprotein 2                                               | R.LPQEPGREQVVEDRPVGGGR.G             | 2 | 2.14 | 0.08 | -4.72 |
| IPI00171411 | Golgi phosphoprotein 2                                               | R.LPQEPGREQVVEDRPVGGGR.G             | 3 | 3.43 | 0.34 | -4.90 |
| IPI00171411 | Golgi phosphoprotein 2                                               | R.NIDVFNVEDQKR.D                     | 2 | 3.42 | 0.39 | -2.74 |
| IPI00171411 | Golgi phosphoprotein 2                                               | R.QQLQALSEPQPR.L                     | 2 | 3.01 | 0.39 | -3.15 |
| IPI00171411 | Golgi phosphoprotein 2                                               | R.QVEKEETNEIQVVNEEPQRDR.L            | 3 | 2.86 | 0.22 | -3.61 |
| IPI00171412 | Isoform 1 of Sulfatase-modifying factor 2 precursor                  | K.SVLWWLPVEK.A                       | 2 | 3.48 | 0.23 | -2.80 |
| IPI00171412 | Isoform 1 of Sulfatase-modifying factor 2 precursor                  | R.EATVKPFAIDIFPVTNK.D                | 3 | 2.44 | 0.06 | -3.14 |
| IPI00171412 | Isoform 1 of Sulfatase-modifying factor 2 precursor                  | R.MGNTPDSASDNLGFR.C                  | 2 | 1.97 | 0.11 | -2.20 |
| IPI00171412 | Isoform 1 of Sulfatase-modifying factor 2 precursor                  | W.IDTADGSANHR.A                      | 2 | 2.96 | 0.23 | -1.33 |
| IPI00171438 | Thioredoxin domain-containing protein 5 precursor                    | K.LFKPGQEAVK.Y                       | 2 | 2.23 | 0.11 | -1.84 |
| IPI00171438 | Thioredoxin domain-containing protein 5 precursor                    | R.DLESLREYVESQLQR.T                  | 2 | 3.74 | 0.25 | -3.39 |
| IPI00171438 | Thioredoxin domain-containing protein 5 precursor                    | R.DLESLREYVESQLQR.T                  | 3 | 4.47 | 0.29 | -2.78 |
| IPI00171438 | Thioredoxin domain-containing protein 5 precursor                    | R.EYVESQLQR.T                        | 2 | 2.52 | 0.11 | -1.44 |
| IPI00171473 | Spondin-1 precursor                                                  | K.AQWPAWQPLNVR.A                     | 2 | 3.38 | 0.32 | -2.13 |
| IPI00171473 | Spondin-1 precursor                                                  | K.IRPLTSLDHPQSPFYDPEGGSITQVAR.V      | 3 | 5.91 | 0.53 | -3.61 |
| IPI00171473 | Spondin-1 precursor                                                  | K.IRPLTSLDHPQSPFYDPEGGSITQVAR.V      | 4 | 3.41 | 0.21 | -3.29 |
| IPI00171473 | Spondin-1 precursor                                                  | K.SLAELGDCNEDLEQVEK.C                | 2 | 4.83 | 0.44 | -5.41 |
| IPI00171473 | Spondin-1 precursor                                                  | R.AAPSAEFSVDR.T                      | 2 | 3.39 | 0.46 | -4.07 |
| IPI00171473 | Spondin-1 precursor                                                  | R.EGYTEFSLR.V                        | 2 | 2.45 | 0.24 |       |
| IPI00171473 | Spondin-1 precursor                                                  | R.GFTLIALR.E                         | 2 | 2.62 | 0.13 | -2.27 |
| IPI00171473 | Spondin-1 precursor                                                  | R.VTLSAAPPYFR.G                      | 2 | 3.11 | 0.37 | -4.42 |
| IPI00171611 | Histone H3.2                                                         | R.FQSSAVMALQEASEAYLVGLFEDTNLCAIHAK.R | 3 | 3.58 | 0.38 | -1.97 |
| IPI00171647 | Isoform 1 of Sialic acid-binding Ig-like lectin 8 precursor          | R.SCRKKSARPAAGVGDGTGMEDAKAIR.G       | 2 | 1.63 | 0.17 |       |
| IPI00171678 | Dopamine beta-hydroxylase                                            | R.TPEGLTLLFK.R                       | 2 | 3.47 | 0.41 | -2.04 |
| IPI00171737 | Isoform 2 of Leucine-rich repeat and death domain-containing protein | R.MGLAPKDPALPGSSAPQPPEPAQA.-         | 3 | 2.35 | 0.10 | -4.26 |
| IPI00171874 | Ras guanyl-releasing protein 3                                       | R.M*TEEFREVASQLGYEK.H                | 2 | 2.56 | 0.17 |       |
| IPI00171928 | Angiopoietin-related protein 7 precursor                             | A.AQTVTQTSADAIYDCSSLYQK.N            | 2 | 5.91 | 0.63 | -3.92 |
| IPI00171928 | Angiopoietin-related protein 7 precursor                             | A.AQTVTQTSADAIYDCSSLYQK.N            | 3 | 5.42 | 0.41 | -2.70 |
| IPI00171928 | Angiopoietin-related protein 7 precursor                             | K.SGLVSFYR.D                         | 2 | 2.81 | 0.08 | -2.77 |
| IPI00171928 | Angiopoietin-related protein 7 precursor                             | R.LRVEM*EDWEGNLR.Y                   | 3 | 2.60 | 0.09 | -1.85 |
| IPI00171928 | Angiopoietin-related protein 7 precursor                             | R.VEM*EDWEGNLR.Y                     | 2 | 2.76 | 0.27 | -3.69 |
| IPI00171928 | Angiopoietin-related protein 7 precursor                             | R.YAEYSHFVLGNELNSYR.L                | 2 | 5.88 | 0.61 | -3.27 |
| IPI00171928 | Angiopoietin-related protein 7 precursor                             | R.YAEYSHFVLGNELNSYR.L                | 3 | 4.55 | 0.37 | -3.11 |
| IPI00174976 | Isoform 1 of MAGUK p55 subfamily member 5                            | -.MTTSHMNGHVTEESDSEVK.N              | 3 | 2.84 | 0.17 | -6.57 |
| IPI00175019 | similar to Temporarily Assigned Gene name family member              | K.ANLTDMESGSSNAM*NMNVQHEREDKNIQK.M   | 3 | 3.96 | 0.21 |       |

|             |                                                     |                          |   |      |      |       |
|-------------|-----------------------------------------------------|--------------------------|---|------|------|-------|
| IPI00175654 | Probable mast cell antigen 32 homolog precursor     | K.SLQITYSLFR.R           | 2 | 2.71 | 0.30 | -0.82 |
| IPI00175989 | Rho family guanine-nucleotide exchange factor       | K.EDLQIYFKYHK.N          | 3 | 3.20 | 0.11 |       |
| IPI00175989 | Rho family guanine-nucleotide exchange factor       | K.KLEEKSQEPLEK.A         | 2 | 2.58 | 0.18 |       |
| IPI00176104 | Isoform 1 of SLIT and NTRK-like protein 2 precursor | K.LLFLNNNLLR.T           | 2 | 2.74 | 0.20 | -2.38 |
| IPI00176104 | Isoform 1 of SLIT and NTRK-like protein 2 precursor | K.VLILNDNLLLSLPSNVFR.F   | 3 | 3.85 | 0.25 | -3.30 |
| IPI00176193 | Isoform 1 of Collagen alpha-1(XIV) chain precursor  | K.ASAHAITGPPELITSEVTAR.S | 3 | 2.77 | 0.17 | -2.92 |
| IPI00176193 | Isoform 1 of Collagen alpha-1(XIV) chain precursor  | K.LQEIEGPSVSIM*EK.T      | 2 | 4.41 | 0.34 | -3.85 |
| IPI00176193 | Isoform 1 of Collagen alpha-1(XIV) chain precursor  | K.TKETLLDAIK.H           | 2 | 2.76 | 0.13 | -2.79 |
| IPI00176193 | Isoform 1 of Collagen alpha-1(XIV) chain precursor  | K.TLFLGVTNLQAK.H         | 2 | 4.11 | 0.35 | -3.78 |
| IPI00176193 | Isoform 1 of Collagen alpha-1(XIV) chain precursor  | K.TNQLNLQNTATK.A         | 2 | 4.25 | 0.43 | -1.99 |
| IPI00176193 | Isoform 1 of Collagen alpha-1(XIV) chain precursor  | K.VIVVITDGR.S            | 2 | 2.77 | 0.17 | -1.79 |
| IPI00176193 | Isoform 1 of Collagen alpha-1(XIV) chain precursor  | R.DTLFTAESGTR.R          | 2 | 3.95 | 0.44 | -3.82 |
| IPI00176193 | Isoform 1 of Collagen alpha-1(XIV) chain precursor  | R.ILPDTQPFPALWEILNK.N    | 2 | 3.94 | 0.37 | -4.75 |
| IPI00176193 | Isoform 1 of Collagen alpha-1(XIV) chain precursor  | R.ILPDTQPFPALWEILNK.N    | 3 | 3.82 | 0.16 | -4.42 |
| IPI00176193 | Isoform 1 of Collagen alpha-1(XIV) chain precursor  | R.ISNVGSNSAR.L           | 2 | 2.94 | 0.32 | -0.73 |
| IPI00176193 | Isoform 1 of Collagen alpha-1(XIV) chain precursor  | R.VVYYPTR.G              | 2 | 1.80 | 0.10 | -1.77 |
| IPI00176221 | Neuronal growth regulator 1 precursor               | C.SAENDVSFPDVR.K         | 2 | 3.16 | 0.23 | -2.35 |
| IPI00176221 | Neuronal growth regulator 1 precursor               | K.GDTAVLR.C              | 1 | 1.55 | 0.09 | -1.71 |
| IPI00176221 | Neuronal growth regulator 1 precursor               | K.KLFNGQQGIIIQNF.S       | 2 | 3.46 | 0.25 | -4.00 |
| IPI00176221 | Neuronal growth regulator 1 precursor               | K.KLFNGQQGIIIQNFSTR.S    | 2 | 5.70 | 0.59 | -4.73 |
| IPI00176221 | Neuronal growth regulator 1 precursor               | K.KLFNGQQGIIIQNFSTR.S    | 3 | 4.54 | 0.29 | -4.61 |
| IPI00176221 | Neuronal growth regulator 1 precursor               | K.LFNGQQGIIIQNFSTR.S     | 2 | 5.43 | 0.46 | -3.46 |
| IPI00176221 | Neuronal growth regulator 1 precursor               | K.LFNGQQGIIIQNFSTR.S     | 3 | 5.27 | 0.35 | -3.28 |
| IPI00176221 | Neuronal growth regulator 1 precursor               | K.VKVVVNFAPTIQEIK.S      | 3 | 3.24 | 0.34 | -3.43 |
| IPI00176221 | Neuronal growth regulator 1 precursor               | K.VVVNFAPTIQEIK.S        | 1 | 3.02 | 0.39 | -2.92 |
| IPI00176221 | Neuronal growth regulator 1 precursor               | K.VVVNFAPTIQEIK.S        | 2 | 4.07 | 0.34 | -3.69 |
| IPI00176221 | Neuronal growth regulator 1 precursor               | N.GQQGIIIQNFSTR.S        | 2 | 3.84 | 0.47 | -1.26 |
| IPI00176221 | Neuronal growth regulator 1 precursor               | P.AGQSVDFPWAAVDNM*M*VR.K | 2 | 4.98 | 0.60 | -2.57 |
| IPI00176221 | Neuronal growth regulator 1 precursor               | P.AGQSVDFPWAAVDNM*M*VR.K | 3 | 5.94 | 0.51 | -1.98 |

|             |                                                     |                                         |   |      |      |       |
|-------------|-----------------------------------------------------|-----------------------------------------|---|------|------|-------|
| IPI00176221 | Neuronal growth regulator 1 precursor               | R.CYLEDGASK.G                           | 1 | 2.76 | 0.24 | -4.71 |
| IPI00176221 | Neuronal growth regulator 1 precursor               | R.CYLEDGASK.G                           | 2 | 3.06 | 0.41 | -2.96 |
| IPI00176221 | Neuronal growth regulator 1 precursor               | R.DQAGEYECSAENDVSFPDVR.K                | 2 | 5.11 | 0.53 | -3.43 |
| IPI00176221 | Neuronal growth regulator 1 precursor               | R.DQAGEYECSAENDVSFPDVRK.V               | 2 | 4.82 | 0.57 | -3.04 |
| IPI00176221 | Neuronal growth regulator 1 precursor               | R.DQAGEYECSAENDVSFPDVRK.V               | 3 | 5.15 | 0.51 | -3.91 |
| IPI00176221 | Neuronal growth regulator 1 precursor               | R.DYSLQIQNVDTVDDGPYTCSVQTQHTPR.T        | 3 | 6.36 | 0.52 | -3.66 |
| IPI00176221 | Neuronal growth regulator 1 precursor               | R.DYSLQIQNVDTVDDGPYTCSVQTQHTPR.T        | 4 | 3.40 | 0.19 | -2.07 |
| IPI00176221 | Neuronal growth regulator 1 precursor               | R.HISPSAKPFENGQYLDIYGITR.D              | 2 | 4.75 | 0.43 | -3.73 |
| IPI00176221 | Neuronal growth regulator 1 precursor               | R.HISPSAKPFENGQYLDIYGITR.D              | 3 | 5.27 | 0.53 | -4.51 |
| IPI00176221 | Neuronal growth regulator 1 precursor               | R.HISPSAKPFENGQYLDIYGITR.D              | 4 | 3.46 | 0.27 | -3.61 |
| IPI00176221 | Neuronal growth regulator 1 precursor               | R.KGDTAVLR.C                            | 1 | 2.01 | 0.05 | -1.13 |
| IPI00176221 | Neuronal growth regulator 1 precursor               | R.KGDTAVLR.C                            | 2 | 2.93 | 0.11 | -2.46 |
| IPI00176221 | Neuronal growth regulator 1 precursor               | R.SSIIFAGGDK.W                          | 1 | 2.49 | 0.22 | -2.75 |
| IPI00176221 | Neuronal growth regulator 1 precursor               | R.SSIIFAGGDK.W                          | 2 | 3.11 | 0.19 | -2.11 |
| IPI00176221 | Neuronal growth regulator 1 precursor               | R.TM*QVHLTVQVPPK.I                      | 2 | 4.06 | 0.50 | -4.74 |
| IPI00176221 | Neuronal growth regulator 1 precursor               | R.TM*QVHLTVQVPPK.I                      | 3 | 4.96 | 0.49 | -4.33 |
| IPI00176221 | Neuronal growth regulator 1 precursor               | R.VSISTLNKR.D                           | 2 | 2.45 | 0.12 | -3.07 |
| IPI00176398 | Isoform 1 of SLIT and NTRK-like protein 6 precursor | K.VLILNDNAIESLPPNIFR.F                  | 2 | 4.49 | 0.43 | -3.93 |
| IPI00176398 | Isoform 1 of SLIT and NTRK-like protein 6 precursor | R.FVPLTHLCLR.G                          | 2 | 2.17 | 0.11 | -3.84 |
| IPI00176398 | Isoform 1 of SLIT and NTRK-like protein 6 precursor | R.GNQLQTLPHYVGFLEHIGR.I                 | 2 | 2.49 | 0.41 | -2.95 |
| IPI00176424 | Neuroigin-2 precursor                               | K.GNYGLLDQIQALR.W                       | 2 | 3.90 | 0.15 | -2.82 |
| IPI00176424 | Neuroigin-2 precursor                               | K.TLLALFTDHQWVAPAVATAK.L                | 3 | 3.21 | 0.23 | -3.33 |
| IPI00176424 | Neuroigin-2 precursor                               | Q.RGGGGPGGGAPGGPGLGLGSLGEERFPVVNTAYGR.V | 3 | 6.71 | 0.60 | -1.07 |
| IPI00176424 | Neuroigin-2 precursor                               | R.ELNNEILGPVVQFLGVPYATPPLGAR.R          | 3 | 4.20 | 0.41 | -2.53 |
| IPI00176424 | Neuroigin-2 precursor                               | R.ELVDQDVQPAR.Y                         | 2 | 3.12 | 0.18 | -2.14 |
| IPI00176424 | Neuroigin-2 precursor                               | R.LGVLGFLSTGDQAAK.G                     | 2 | 5.01 | 0.48 | -3.60 |
| IPI00176427 | Cell adhesion molecule 4 precursor                  | K.DDGGIICEAQNALPSGHSK.Q                 | 2 | 4.23 | 0.51 | -5.11 |
| IPI00176427 | Cell adhesion molecule 4 precursor                  | K.ELKGVSSSQENGV.V                       | 2 | 2.83 | 0.32 | -5.57 |
| IPI00176427 | Cell adhesion molecule 4 precursor                  | K.GVSSSQENGVVSVASTVR.F                  | 2 | 4.87 | 0.49 | -3.57 |
| IPI00176427 | Cell adhesion molecule 4 precursor                  | K.GVSSSQENGVVSVASTVR.F                  | 3 | 3.83 | 0.36 | -3.41 |
| IPI00176427 | Cell adhesion molecule 4 precursor                  | K.QTQYVLDVQYSPTAR.I                     | 2 | 4.43 | 0.46 | -5.61 |
| IPI00176427 | Cell adhesion molecule 4 precursor                  | K.VVSVASTVR.F                           | 2 | 2.88 | 0.11 | -1.70 |
| IPI00176427 | Cell adhesion molecule 4 precursor                  | L.TVLVAPENPVVEVR.E                      | 2 | 3.53 | 0.30 | -1.89 |
| IPI00176427 | Cell adhesion molecule 4 precursor                  | R.EGDTLVLTCAVTGNPRPNQIR.W               | 3 | 4.69 | 0.54 | -2.56 |
| IPI00176427 | Cell adhesion molecule 4 precursor                  | R.EQAVEGGEVELSCLVPR.S                   | 2 | 5.35 | 0.53 | -4.69 |
| IPI00176427 | Cell adhesion molecule 4 precursor                  | R.EQAVEGGEVELSCLVPR.S                   | 3 | 3.22 | 0.21 | -2.48 |
| IPI00176427 | Cell adhesion molecule 4 precursor                  | R.FQLEEFSPR.R                           | 1 | 2.43 | 0.16 | -3.49 |
| IPI00176427 | Cell adhesion molecule 4 precursor                  | R.FQLEEFSPR.R                           | 2 | 3.53 | 0.22 | -2.28 |
| IPI00176427 | Cell adhesion molecule 4 precursor                  | R.FQLEEFSPRR.V                          | 2 | 2.50 | 0.12 | -4.42 |

|             |                                                                        |                                       |   |      |      |       |
|-------------|------------------------------------------------------------------------|---------------------------------------|---|------|------|-------|
| IPI00176427 | Cell adhesion molecule 4 precursor                                     | R.IHASQAVVR.E                         | 2 | 2.10 | 0.21 |       |
| IPI00176427 | Cell adhesion molecule 4 precursor                                     | R.KDDGGIIICEAQNQALPSGHSK.Q            | 3 | 6.09 | 0.45 | -3.03 |
| IPI00176427 | Cell adhesion molecule 4 precursor                                     | R.KDDGGIIICEAQNQALPSGHSK.Q            | 4 | 3.36 | 0.22 | -3.01 |
| IPI00176427 | Cell adhesion molecule 4 precursor                                     | R.LHQYDGSIVVIQNPARG.Q                 | 2 | 5.61 | 0.57 | -4.05 |
| IPI00176427 | Cell adhesion molecule 4 precursor                                     | R.LHQYDGSIVVIQNPARG.Q                 | 3 | 5.29 | 0.24 | -2.76 |
| IPI00176458 | protocadherin 1 isoform 2 precursor                                    | A.TRVVYKVPEEQPPNTLIGSLAADYGFPDVGHLK.L | 4 | 6.01 | 0.51 | -4.20 |
| IPI00176458 | protocadherin 1 isoform 2 precursor                                    | K.ANDSQGANAEIEYTFHQAPEVVR.R           | 3 | 3.67 | 0.41 | -4.56 |
| IPI00176458 | protocadherin 1 isoform 2 precursor                                    | K.DM*NDNAPTIEIR.G                     | 2 | 3.71 | 0.33 | -4.70 |
| IPI00176458 | protocadherin 1 isoform 2 precursor                                    | K.GLFTISPETGEIQVK.T                   | 2 | 2.88 | 0.28 | -5.85 |
| IPI00176458 | protocadherin 1 isoform 2 precursor                                    | K.LEVGAPYLR.V                         | 2 | 2.77 | 0.21 | -1.17 |
| IPI00176458 | protocadherin 1 isoform 2 precursor                                    | K.TGDIFTTETSIDR.E                     | 2 | 3.85 | 0.22 | -1.60 |
| IPI00176458 | protocadherin 1 isoform 2 precursor                                    | K.TGDIFTTETSIDREGLR.E                 | 2 | 3.24 | 0.27 | -3.04 |
| IPI00176458 | protocadherin 1 isoform 2 precursor                                    | K.TGDIFTTETSIDREGLR.E                 | 3 | 2.76 | 0.24 | -2.48 |
| IPI00176458 | protocadherin 1 isoform 2 precursor                                    | K.VPEEQPPNTLIGSLAADYGFPDVGHLK.L       | 3 | 7.65 | 0.62 | -3.38 |
| IPI00176458 | protocadherin 1 isoform 2 precursor                                    | K.YFLQTTTPLDYEK.V                     | 2 | 2.54 | 0.30 | -5.06 |
| IPI00176458 | protocadherin 1 isoform 2 precursor                                    | R.EQQSTYTFQLK.A                       | 2 | 2.50 | 0.23 | -3.35 |
| IPI00176458 | protocadherin 1 isoform 2 precursor                                    | R.GGQEPAGAGSPSPEDR.N                  | 2 | 4.30 | 0.46 | -2.92 |
| IPI00176458 | protocadherin 1 isoform 2 precursor                                    | R.NTGLITVQGPVDREDLSTLR.F              | 2 | 4.03 | 0.39 | -3.89 |
| IPI00176458 | protocadherin 1 isoform 2 precursor                                    | R.NTGLITVQGPVDREDLSTLR.F              | 3 | 3.62 | 0.41 | -2.87 |
| IPI00176458 | protocadherin 1 isoform 2 precursor                                    | R.TLLETLLGHSLDTPLDIDIAGDPEYER.S       | 3 | 3.45 | 0.31 | -5.30 |
| IPI00176458 | protocadherin 1 isoform 2 precursor                                    | R.VVYKVPEEQPPNTLIGSLAADYGFPDVGHLK.L   | 3 | 5.12 | 0.57 | -2.94 |
| IPI00176458 | protocadherin 1 isoform 2 precursor                                    | R.WDSYDLTIK.V                         | 2 | 2.07 | 0.24 | -1.48 |
| IPI00176581 | Isoform 1 of Fanconi anemia group M protein                            | R.LWQDHPLPTHQVDHSDR.C                 | 3 | 2.90 | 0.19 | -3.61 |
| IPI00176581 | Isoform 1 of Fanconi anemia group M protein                            | R.STFIAPR.K                           | 1 | 1.69 | 0.18 | -1.09 |
| IPI00176920 | Nephrocystin-4                                                         | K.QPAEAVSATEPVTFNPQK.E                | 2 | 2.68 | 0.15 | -7.95 |
| IPI00177543 | peptidylglycine alpha-amidating monooxygenase isoform a, preproprotein | D.PNNKEGPVLILGR.S                     | 3 | 3.59 | 0.20 | -0.71 |
| IPI00177543 | peptidylglycine alpha-amidating monooxygenase isoform a, preproprotein | G.ADSEHKLETSSGR.V                     | 2 | 3.50 | 0.42 | -1.26 |
| IPI00177543 | peptidylglycine alpha-amidating monooxygenase isoform a, preproprotein | I.PVDEEAFVIDFKPR.A                    | 3 | 5.08 | 0.47 | -2.28 |
| IPI00177543 | peptidylglycine alpha-amidating monooxygenase isoform a, preproprotein | K.AGIEVQEIK.E                         | 1 | 2.05 | 0.06 | -3.46 |
| IPI00177543 | peptidylglycine alpha-amidating monooxygenase isoform a, preproprotein | K.AGIEVQEIK.E                         | 2 | 2.87 | 0.11 | -1.75 |
| IPI00177543 | peptidylglycine alpha-amidating monooxygenase isoform a, preproprotein | K.AGIEVQEIKEAEAVVETK.M                | 2 | 4.83 | 0.43 | -4.29 |
| IPI00177543 | peptidylglycine alpha-amidating monooxygenase isoform a, preproprotein | K.AGIEVQEIKEAEAVVETK.M                | 3 | 4.16 | 0.37 | -4.08 |
| IPI00177543 | peptidylglycine alpha-amidating monooxygenase isoform a, preproprotein | K.ANILYAWAR.N                         | 2 | 3.66 | 0.33 | -0.81 |

|             |                                                                        |                                             |   |      |      |       |
|-------------|------------------------------------------------------------------------|---------------------------------------------|---|------|------|-------|
| IPI00177543 | peptidylglycine alpha-amidating monooxygenase isoform a, preproprotein | K.DGNYWVTDVALHQVFK.L                        | 3 | 3.05 | 0.39 | -3.20 |
| IPI00177543 | peptidylglycine alpha-amidating monooxygenase isoform a, preproprotein | K.EAEAVVETK.M                               | 2 | 2.24 | 0.19 | -2.00 |
| IPI00177543 | peptidylglycine alpha-amidating monooxygenase isoform a, preproprotein | K.EGPVLILGR.S                               | 2 | 1.99 | 0.05 | -0.91 |
| IPI00177543 | peptidylglycine alpha-amidating monooxygenase isoform a, preproprotein | K.ETEKDKIPLLQQPK.R                          | 2 | 4.24 | 0.38 | -4.61 |
| IPI00177543 | peptidylglycine alpha-amidating monooxygenase isoform a, preproprotein | K.FITQWGEESSGSSPLPGQFTVPHSLALVPLLQQLCVADR.E | 3 | 6.02 | 0.56 | -2.67 |
| IPI00177543 | peptidylglycine alpha-amidating monooxygenase isoform a, preproprotein | K.FITQWGEESSGSSPLPGQFTVPHSLALVPLLQQLCVADR.E | 4 | 4.41 | 0.36 | -2.40 |
| IPI00177543 | peptidylglycine alpha-amidating monooxygenase isoform a, preproprotein | K.FTLTEKLEHR.S                              | 2 | 3.00 | 0.31 | -4.14 |
| IPI00177543 | peptidylglycine alpha-amidating monooxygenase isoform a, preproprotein | K.FTLTEKLEHR.S                              | 3 | 2.73 | 0.27 | -4.40 |
| IPI00177543 | peptidylglycine alpha-amidating monooxygenase isoform a, preproprotein | K.FVYQQIGLPIEEDTILVIDPNNAAVLQSSGK.N         | 2 | 3.10 | 0.58 | -2.93 |
| IPI00177543 | peptidylglycine alpha-amidating monooxygenase isoform a, preproprotein | K.FVYQQIGLPIEEDTILVIDPNNAAVLQSSGK.N         | 3 | 7.50 | 0.62 | -5.69 |
| IPI00177543 | peptidylglycine alpha-amidating monooxygenase isoform a, preproprotein | K.FVYQQIGLPIEEDTILVIDPNNAAVLQSSGK.N         | 4 | 4.72 | 0.40 | -3.52 |
| IPI00177543 | peptidylglycine alpha-amidating monooxygenase isoform a, preproprotein | K.GSGGLNLGNFFASR.K                          | 2 | 4.19 | 0.40 | -2.67 |
| IPI00177543 | peptidylglycine alpha-amidating monooxygenase isoform a, preproprotein | K.HAVSFM*TCTQNVAPDM*FR.T                    | 2 | 5.15 | 0.58 | -3.91 |
| IPI00177543 | peptidylglycine alpha-amidating monooxygenase isoform a, preproprotein | K.IPLLQQPK.R                                | 2 | 2.50 | 0.13 | -0.92 |
| IPI00177543 | peptidylglycine alpha-amidating monooxygenase isoform a, preproprotein | K.KAGIEVQEIK.E                              | 2 | 2.77 | 0.18 | -0.24 |
| IPI00177543 | peptidylglycine alpha-amidating monooxygenase isoform a, preproprotein | K.LDPNNKEGPVLILGR.S                         | 2 | 3.26 | 0.32 | -2.86 |
| IPI00177543 | peptidylglycine alpha-amidating monooxygenase isoform a, preproprotein | K.LDPNNKEGPVLILGR.S                         | 3 | 4.10 | 0.41 | -1.88 |
| IPI00177543 | peptidylglycine alpha-amidating monooxygenase isoform a, preproprotein | K.LIKEPGSGVPVVL.I                           | 2 | 3.06 | 0.40 | -3.41 |
| IPI00177543 | peptidylglycine alpha-amidating monooxygenase isoform a, preproprotein | K.LIKEPGSGVPVVL.I.T                         | 2 | 3.04 | 0.36 | -2.06 |
| IPI00177543 | peptidylglycine alpha-amidating monooxygenase isoform a, preproprotein | K.LIKEPGSGVPVVLIT.T                         | 2 | 3.58 | 0.41 | -3.08 |
| IPI00177543 | peptidylglycine alpha-amidating monooxygenase isoform a, preproprotein | K.LLGEREDVVHVHK.Y                           | 2 | 2.76 | 0.29 | -2.89 |



|             |                                                                        |                            |   |      |      |       |
|-------------|------------------------------------------------------------------------|----------------------------|---|------|------|-------|
| IPI00177543 | peptidylglycine alpha-amidating monooxygenase isoform a, preproprotein | K.LLGEREDVVHVHK.Y          | 3 | 3.30 | 0.38 | -2.36 |
| IPI00177543 | peptidylglycine alpha-amidating monooxygenase isoform a, preproprotein | K.M*ENKPTSSELQ.K           | 2 | 3.29 | 0.17 | -1.04 |
| IPI00177543 | peptidylglycine alpha-amidating monooxygenase isoform a, preproprotein | K.M*ENKPTSSELQK.M          | 2 | 3.52 | 0.25 | -3.90 |
| IPI00177543 | peptidylglycine alpha-amidating monooxygenase isoform a, preproprotein | K.M*ENKPTSSELQK.M          | 3 | 2.51 | 0.06 | -1.91 |
| IPI00177543 | peptidylglycine alpha-amidating monooxygenase isoform a, preproprotein | K.NLFYLPGLSIDK.D           | 2 | 2.86 | 0.20 | -2.77 |
| IPI00177543 | peptidylglycine alpha-amidating monooxygenase isoform a, preproprotein | K.NNLVIFHR.G               | 1 | 2.60 | 0.12 | -0.99 |
| IPI00177543 | peptidylglycine alpha-amidating monooxygenase isoform a, preproprotein | K.NNLVIFHR.G               | 2 | 2.82 | 0.17 | 0.64  |
| IPI00177543 | peptidylglycine alpha-amidating monooxygenase isoform a, preproprotein | K.NYPM*HVFAJR.V            | 2 | 2.15 | 0.16 | -0.94 |
| IPI00177543 | peptidylglycine alpha-amidating monooxygenase isoform a, preproprotein | K.QSDTYFCM*SM*R.I          | 2 | 2.86 | 0.44 | -3.09 |
| IPI00177543 | peptidylglycine alpha-amidating monooxygenase isoform a, preproprotein | K.REEEEVLDQGDYFYSLLSK.L    | 2 | 5.61 | 0.52 | -5.66 |
| IPI00177543 | peptidylglycine alpha-amidating monooxygenase isoform a, preproprotein | K.REEEEVLDQGDYFYSLLSK.L    | 3 | 5.34 | 0.38 | -4.43 |
| IPI00177543 | peptidylglycine alpha-amidating monooxygenase isoform a, preproprotein | K.TDTKEFVR.E               | 1 | 2.09 | 0.23 | -2.78 |
| IPI00177543 | peptidylglycine alpha-amidating monooxygenase isoform a, preproprotein | K.TDTKEFVR.E               | 2 | 2.18 | 0.19 | -2.34 |
| IPI00177543 | peptidylglycine alpha-amidating monooxygenase isoform a, preproprotein | K.VVSGYR.V                 | 1 | 1.17 | 0.08 | -2.62 |
| IPI00177543 | peptidylglycine alpha-amidating monooxygenase isoform a, preproprotein | K.YNPTEKAESESDLVAEIANVVQ.K | 2 | 4.87 | 0.46 | -0.06 |
| IPI00177543 | peptidylglycine alpha-amidating monooxygenase isoform a, preproprotein | L.DPNNKEGPVLILGR.S         | 3 | 3.85 | 0.35 | -0.73 |
| IPI00177543 | peptidylglycine alpha-amidating monooxygenase isoform a, preproprotein | P.QAFYPVGHVPDVSFGDLLAAR.C  | 3 | 3.88 | 0.39 | -3.12 |
| IPI00177543 | peptidylglycine alpha-amidating monooxygenase isoform a, preproprotein | R.EDVVHVHK.Y               | 2 | 2.20 | 0.27 | -2.42 |
| IPI00177543 | peptidylglycine alpha-amidating monooxygenase isoform a, preproprotein | R.EEEEEVLDQGDYFYSLLSK.L    | 2 | 5.52 | 0.53 | -4.70 |
| IPI00177543 | peptidylglycine alpha-amidating monooxygenase isoform a, preproprotein | R.EEEEEVLDQGDYFYSLLSK.L    | 3 | 5.40 | 0.45 | -3.25 |
| IPI00177543 | peptidylglycine alpha-amidating monooxygenase isoform a, preproprotein | R.EGAEHERGNAILVR.D         | 2 | 2.14 | 0.09 | -2.81 |

|             |                                                                        |                                           |   |      |      |       |
|-------------|------------------------------------------------------------------------|-------------------------------------------|---|------|------|-------|
| IPI00177543 | peptidylglycine alpha-amidating monooxygenase isoform a, preproprotein | R.GKGSGGLNLGNFFASR.K                      | 2 | 5.47 | 0.55 | -4.07 |
| IPI00177543 | peptidylglycine alpha-amidating monooxygenase isoform a, preproprotein | R.GKGSGGLNLGNFFASR.K                      | 3 | 4.18 | 0.39 | -2.26 |
| IPI00177543 | peptidylglycine alpha-amidating monooxygenase isoform a, preproprotein | R.IPVDEEAFVIDFKPR.A                       | 2 | 4.95 | 0.56 | -6.23 |
| IPI00177543 | peptidylglycine alpha-amidating monooxygenase isoform a, preproprotein | R.IPVDEEAFVIDFKPR.A                       | 3 | 4.65 | 0.48 | -4.22 |
| IPI00177543 | peptidylglycine alpha-amidating monooxygenase isoform a, preproprotein | R.IVQFSPSGK.F                             | 1 | 2.27 | 0.17 | -3.21 |
| IPI00177543 | peptidylglycine alpha-amidating monooxygenase isoform a, preproprotein | R.IVQFSPSGK.F                             | 2 | 2.61 | 0.22 | -2.07 |
| IPI00177543 | peptidylglycine alpha-amidating monooxygenase isoform a, preproprotein | R.LSTEGSDQEKKDDGSESEEEYSAPLPALAPSSS.-     | 3 | 3.29 | 0.39 | -0.99 |
| IPI00177543 | peptidylglycine alpha-amidating monooxygenase isoform a, preproprotein | R.M*PGVTPK.Q                              | 1 | 1.96 | 0.06 | -2.26 |
| IPI00177543 | peptidylglycine alpha-amidating monooxygenase isoform a, preproprotein | R.NAPPTRLPK.G                             | 2 | 2.59 | 0.14 | -2.09 |
| IPI00177543 | peptidylglycine alpha-amidating monooxygenase isoform a, preproprotein | R.NGQWTLIGR.Q                             | 1 | 2.01 | 0.11 | -2.79 |
| IPI00177543 | peptidylglycine alpha-amidating monooxygenase isoform a, preproprotein | R.NGQWTLIGR.Q                             | 2 | 3.26 | 0.29 | -0.53 |
| IPI00177543 | peptidylglycine alpha-amidating monooxygenase isoform a, preproprotein | R.QSPQLPQAFYPVGHVPDVVSFGDLLAAR.C          | 2 | 3.13 | 0.49 | -6.57 |
| IPI00177543 | peptidylglycine alpha-amidating monooxygenase isoform a, preproprotein | R.QSPQLPQAFYPVGHVPDVVSFGDLLAAR.C          | 3 | 4.67 | 0.54 | -4.57 |
| IPI00177543 | peptidylglycine alpha-amidating monooxygenase isoform a, preproprotein | R.QSPQLPQAFYPVGHVPDVVSFGDLLAAR.C          | 4 | 4.72 | 0.53 | -3.46 |
| IPI00177543 | peptidylglycine alpha-amidating monooxygenase isoform a, preproprotein | R.SM*QPGSDQNHFCQPTDVAVDPGTGAIYVSDGYCNSR.I | 3 | 6.06 | 0.62 | -4.42 |
| IPI00177543 | peptidylglycine alpha-amidating monooxygenase isoform a, preproprotein | R.SM*QPGSDQNHFCQPTDVAVDPGTGAIYVSDGYCNSR.I | 4 | 4.81 | 0.43 | -5.02 |
| IPI00177543 | peptidylglycine alpha-amidating monooxygenase isoform a, preproprotein | R.TEATHIGGTSSDEM*CNLYIM*YYM*EAK.H         | 3 | 4.79 | 0.45 | -3.46 |
| IPI00177543 | peptidylglycine alpha-amidating monooxygenase isoform a, preproprotein | W.PGVYLLPGQVSGVALDPK.N                    | 2 | 4.54 | 0.42 | -2.14 |
| IPI00177878 | Isoform 3 of Transmembrane protein 16D                                 | -.M*EASSSGITNGK.T                         | 2 | 1.62 | 0.09 | 2.62  |
| IPI00178302 | Isoform 4 of Semaphorin-6D precursor                                   | A.VSFPEDDEPLNTVDYHYSR.Q                   | 2 | 4.12 | 0.51 | -2.83 |
| IPI00178302 | Isoform 4 of Semaphorin-6D precursor                                   | K.HGLAEAYK.T                              | 1 | 2.23 | 0.32 | -3.64 |
| IPI00178302 | Isoform 4 of Semaphorin-6D precursor                                   | K.HGLAEAYK.T                              | 2 | 2.78 | 0.23 | -2.78 |
| IPI00178302 | Isoform 4 of Semaphorin-6D precursor                                   | K.HGLAEAYKTSIDFPDETLSFIK.S                | 3 | 3.43 | 0.42 | -4.69 |
| IPI00178302 | Isoform 4 of Semaphorin-6D precursor                                   | K.IRDTLYIAGR.D                            | 2 | 3.07 | 0.18 | -2.17 |

|             |                                                           |                                         |   |      |      |       |
|-------------|-----------------------------------------------------------|-----------------------------------------|---|------|------|-------|
| IPI00178302 | Isoform 4 of Semaphorin-6D precursor                      | K.LYSATVADFLASDAVIYR.S                  | 2 | 5.52 | 0.49 | -4.89 |
| IPI00178302 | Isoform 4 of Semaphorin-6D precursor                      | K.LYSATVADFLASDAVIYR.S                  | 3 | 2.17 | 0.12 | -3.52 |
| IPI00178302 | Isoform 4 of Semaphorin-6D precursor                      | K.TSIDFPDETLSEFIK.S                     | 2 | 3.29 | 0.29 | -4.41 |
| IPI00178302 | Isoform 4 of Semaphorin-6D precursor                      | Q.DDPNTSDFTDPLSGIPK.G                   | 2 | 4.61 | 0.55 | -1.45 |
| IPI00178302 | Isoform 4 of Semaphorin-6D precursor                      | R.DQVYTVNLNEM*PK.T                      | 2 | 4.45 | 0.39 | -3.79 |
| IPI00178302 | Isoform 4 of Semaphorin-6D precursor                      | R.DQVYTVNLNEM*PKTEVIPNKK.L              | 3 | 3.76 | 0.39 | -2.87 |
| IPI00178302 | Isoform 4 of Semaphorin-6D precursor                      | R.DTLYIAGR.D                            | 2 | 2.53 | 0.08 | -2.74 |
| IPI00178302 | Isoform 4 of Semaphorin-6D precursor                      | R.EIAVEHNNLGK.A                         | 3 | 2.79 | 0.17 | -2.90 |
| IPI00178302 | Isoform 4 of Semaphorin-6D precursor                      | R.KFVVQDDPNTSDFTDPLSGIPK.G              | 3 | 3.37 | 0.32 | -2.77 |
| IPI00178302 | Isoform 4 of Semaphorin-6D precursor                      | R.LSTLEYDGEISGLAR.C                     | 2 | 4.38 | 0.51 | -3.19 |
| IPI00178302 | Isoform 4 of Semaphorin-6D precursor                      | R.QTNVALFADGK.L                         | 1 | 2.11 | 0.28 | -2.37 |
| IPI00178302 | Isoform 4 of Semaphorin-6D precursor                      | R.QTNVALFADGK.L                         | 2 | 2.91 | 0.43 | -3.15 |
| IPI00178302 | Isoform 4 of Semaphorin-6D precursor                      | R.SM*GDGSALR.T                          | 2 | 2.44 | 0.34 | -3.79 |
| IPI00178352 | Isoform 1 of Filamin-C                                    | K.AFGPGLEPTGCIVDKPAEFTIDAR.A            | 3 | 2.26 | 0.17 | -2.10 |
| IPI00178352 | Isoform 1 of Filamin-C                                    | R.TGVEVGKPTHFTVLTK.G                    | 3 | 2.08 | 0.13 | -1.45 |
| IPI00178352 | Isoform 1 of Filamin-C                                    | R.TGVEVGKPTHFTVLTK.G                    | 4 | 2.95 | 0.16 | -2.66 |
| IPI00178727 | Novel protein                                             | K.DICNAM*GSKLTCEKIVKERYENM*MQQQK.L      | 3 | 2.65 | 0.15 | 1.82  |
| IPI00178727 | Novel protein                                             | K.KVASM*M*ESK.D                         | 1 | 1.32 | 0.17 | -3.20 |
| IPI00178767 | Acid sphingomyelinase-like phosphodiesterase 3a precursor | K.GSPVNSLFVAPAVTPVK.S                   | 2 | 3.41 | 0.42 | -4.76 |
| IPI00178767 | Acid sphingomyelinase-like phosphodiesterase 3a precursor | K.KGSPVNSLFVAPAVTPVK.S                  | 2 | 4.30 | 0.42 | -4.17 |
| IPI00178767 | Acid sphingomyelinase-like phosphodiesterase 3a precursor | K.LEYILTQTYDIEDLQPESLYGLAK.Q            | 3 | 3.75 | 0.15 | -5.33 |
| IPI00178767 | Acid sphingomyelinase-like phosphodiesterase 3a precursor | K.QFTILDSK.Q                            | 2 | 1.85 | 0.19 | -1.84 |
| IPI00178767 | Acid sphingomyelinase-like phosphodiesterase 3a precursor | K.VTTNPNLR.I                            | 2 | 2.09 | 0.07 | -1.92 |
| IPI00178767 | Acid sphingomyelinase-like phosphodiesterase 3a precursor | K.YSDVIAGQFYGHTHR.D                     | 2 | 4.13 | 0.54 | -4.05 |
| IPI00178767 | Acid sphingomyelinase-like phosphodiesterase 3a precursor | K.YSDVIAGQFYGHTHR.D                     | 4 | 3.58 | 0.23 | -4.26 |
| IPI00178767 | Acid sphingomyelinase-like phosphodiesterase 3a precursor | R.DSIM*VLSDK.K                          | 2 | 3.06 | 0.11 | -0.03 |
| IPI00178894 | Zinc finger and BTB domain-containing protein 20          | R.SFYSGAM*VSHHETALGLPRDHHMEDPSWITR.I    | 4 | 3.13 | 0.18 | 1.36  |
| IPI00178926 | immunoglobulin J chain                                    | K.CDPTEVELDNQIVTATQSNICDEDSATETCYTYDR.N | 3 | 6.55 | 0.39 |       |
| IPI00178926 | immunoglobulin J chain                                    | K.CYTAVVPLVYGGETK.M                     | 2 | 4.60 | 0.39 |       |
| IPI00178926 | immunoglobulin J chain                                    | R.FVYHLSLCK.K                           | 2 | 3.11 | 0.28 |       |
| IPI00178926 | immunoglobulin J chain                                    | R.SSEDPNEDIVER.N                        | 2 | 3.03 | 0.12 |       |
| IPI00179473 | Isoform 1 of Sequestosome-1                               | R.LTPVSPESSTEELK.S                      | 2 | 2.21 | 0.31 | -5.28 |
| IPI00179589 | Myotrophin                                                | R.KPLHYAADCGQLEIFLLK.G                  | 3 | 3.69 | 0.24 | -1.36 |
| IPI00179851 | NDT80/PhoG like DNA-binding family protein                | K.NSPSLGFHGR.A                          | 2 | 2.10 | 0.12 | -2.48 |

|             |                                                                     |                                 |   |      |      |       |
|-------------|---------------------------------------------------------------------|---------------------------------|---|------|------|-------|
| IPI00179851 | NDT80/PhoG like DNA-binding family protein                          | R.SGPSQM*ALLPVTNIR.A            | 2 | 3.23 | 0.26 | -3.13 |
| IPI00179851 | NDT80/PhoG like DNA-binding family protein                          | R.WPITILSFR.E                   | 2 | 2.91 | 0.23 | -2.82 |
| IPI00180240 | thymosin-like 3                                                     | K.ETIEQEKKQAGES.-               | 2 | 3.61 | 0.29 | -2.72 |
| IPI00180240 | thymosin-like 3                                                     | K.KTETQEKNPLPSK.E               | 2 | 2.99 | 0.35 | -4.88 |
| IPI00180240 | thymosin-like 3                                                     | K.KTETQEKNPLPSKET.I             | 3 | 3.58 | 0.31 | -3.44 |
| IPI00180240 | thymosin-like 3                                                     | K.KTETQEKNPLPSKETIEQEK.Q        | 3 | 2.96 | 0.08 | -4.80 |
| IPI00180240 | thymosin-like 3                                                     | K.KTETQEKNPLPSKETIEQEKQ.A       | 3 | 4.82 | 0.47 | -3.70 |
| IPI00180240 | thymosin-like 3                                                     | K.KTETQEKNPLPSKETIEQEKQAG.E     | 3 | 3.59 | 0.27 | -3.04 |
| IPI00180240 | thymosin-like 3                                                     | K.KTETQEKNPLPSKETIEQEKQAGES.-   | 2 | 3.61 | 0.48 | -4.33 |
| IPI00180240 | thymosin-like 3                                                     | K.KTETQEKNPLPSKETIEQEKQAGES.-   | 3 | 5.43 | 0.49 | -3.86 |
| IPI00180240 | thymosin-like 3                                                     | K.KTETQEKNPLPSKETIEQEKQAGES.-   | 4 | 3.60 | 0.28 | -3.96 |
| IPI00180240 | thymosin-like 3                                                     | K.LKKTETQEKNPLPSKETIEQEKQAGES.- | 4 | 5.38 | 0.48 | -4.34 |
| IPI00180240 | thymosin-like 3                                                     | K.NPLPSKETIEQEK.Q               | 3 | 2.26 | 0.22 | -1.61 |
| IPI00180240 | thymosin-like 3                                                     | K.NPLPSKETIEQEKQ.A              | 2 | 3.30 | 0.37 | -2.04 |
| IPI00180240 | thymosin-like 3                                                     | K.NPLPSKETIEQEKQAGES.-          | 2 | 3.59 | 0.39 | -3.10 |
| IPI00180240 | thymosin-like 3                                                     | K.NPLPSKETIEQEKQAGES.-          | 3 | 2.94 | 0.35 | -2.16 |
| IPI00180240 | thymosin-like 3                                                     | K.TETQEKNPLPSK.E                | 2 | 3.81 | 0.38 | -3.95 |
| IPI00180240 | thymosin-like 3                                                     | K.TETQEKNPLPSK.E                | 3 | 2.64 | 0.13 | -2.28 |
| IPI00180240 | thymosin-like 3                                                     | K.TETQEKNPLPSKETIEQ.E           | 2 | 3.93 | 0.33 | -3.08 |
| IPI00180240 | thymosin-like 3                                                     | K.TETQEKNPLPSKETIEQEK.Q         | 2 | 5.04 | 0.43 | -3.70 |
| IPI00180240 | thymosin-like 3                                                     | K.TETQEKNPLPSKETIEQEK.Q         | 3 | 4.32 | 0.40 | -4.31 |
| IPI00180240 | thymosin-like 3                                                     | K.TETQEKNPLPSKETIEQEKQ.A        | 3 | 4.09 | 0.34 | -3.58 |
| IPI00180240 | thymosin-like 3                                                     | K.TETQEKNPLPSKETIEQEKQAGES.-    | 2 | 4.30 | 0.50 | -3.66 |
| IPI00180240 | thymosin-like 3                                                     | K.TETQEKNPLPSKETIEQEKQAGES.-    | 3 | 4.55 | 0.40 | -4.15 |
| IPI00180384 | dynein, axonemal, heavy chain 7                                     | K.WLIFDGPVDAVWIENMNTVLDDNK.K    | 3 | 3.48 | 0.11 |       |
| IPI00180386 | Isoform GN-1L of Glycogenin-1                                       | K.VVHFLGR.V                     | 2 | 1.84 | 0.17 | -3.91 |
| IPI00180426 | Isoform 3 of G protein-coupled receptor kinase 4                    | R.IKRRKGEAM*ALNEKR.I            | 2 | 2.07 | 0.19 |       |
| IPI00180707 | Isoform 1 of FRAS1-related extracellular matrix protein 2 precursor | K.AFQELGVR.Y                    | 2 | 2.44 | 0.06 | -2.40 |
| IPI00180707 | Isoform 1 of FRAS1-related extracellular matrix protein 2 precursor | R.ALLSPGLAGAAGVPAEEAIVLANR.G    | 3 | 4.80 | 0.46 | -4.15 |
| IPI00180707 | Isoform 1 of FRAS1-related extracellular matrix protein 2 precursor | R.NLPLVVEELLGTSNALDAR.S         | 3 | 4.93 | 0.50 | -3.65 |
| IPI00180707 | Isoform 1 of FRAS1-related extracellular matrix protein 2 precursor | R.VGILSGLGALPR.Y                | 2 | 3.48 | 0.26 | -2.27 |
| IPI00181079 | Meteorin-like protein precursor                                     | R.GSIQQVTHEPERQDSAIHLR.V        | 3 | 3.42 | 0.24 | -5.53 |
| IPI00181079 | Meteorin-like protein precursor                                     | R.GSIQQVTHEPERQDSAIHLR.V        | 4 | 3.09 | 0.24 | -2.50 |
| IPI00181079 | Meteorin-like protein precursor                                     | R.SFTDSSGANIYLEK.T              | 2 | 4.56 | 0.31 |       |
| IPI00181174 | Isoform 1 of Neuroligin-4, X-linked precursor                       | K.GNYGLLDQIQLR.W                | 2 | 3.90 | 0.15 | -2.82 |
| IPI00181174 | Isoform 1 of Neuroligin-4, X-linked precursor                       | R.ILADKVGCNM*LDTTDM*VECLR.N     | 3 | 4.22 | 0.46 | -3.11 |
| IPI00181174 | Isoform 1 of Neuroligin-4, X-linked precursor                       | R.LGILGFLSTGDQAAK.G             | 2 | 4.85 | 0.55 | -3.56 |
| IPI00181174 | Isoform 1 of Neuroligin-4, X-linked precursor                       | R.TPLPNEILGPVEQYLGVYPASPPTGER.R | 3 | 3.18 | 0.26 | -4.02 |

|             |                                                                             |                                  |   |      |      |       |
|-------------|-----------------------------------------------------------------------------|----------------------------------|---|------|------|-------|
| IPI00181174 | Isoform 1 of Neuroligin-4, X-linked precursor                               | R.TPLPNEILGPVEQYLGVPYASPTGERR.F  | 3 | 3.62 | 0.42 | -2.09 |
| IPI00181743 | Isoform 1 of BAI1-associated protein 3                                      | K.CLGKQLFQPSFEICPFESLNMDIAAALK.R | 3 | 3.29 | 0.12 |       |
| IPI00181743 | Isoform 1 of BAI1-associated protein 3                                      | R.FGRLSVRCHYEAAEQR.L             | 2 | 2.95 | 0.06 |       |
| IPI00182138 | Isoform 2 of Granulins precursor                                            | K.APAHLSLPDPQALKR.D              | 3 | 2.86 | 0.30 | -1.10 |
| IPI00182138 | Isoform 2 of Granulins precursor                                            | R.CPDGSTCCELPSPGK.Y              | 2 | 3.06 | 0.33 | -4.26 |
| IPI00182138 | Isoform 2 of Granulins precursor                                            | R.SRCPDGSTCCELPSPGK.Y            | 3 | 3.61 | 0.32 |       |
| IPI00182194 | Teneurin-2                                                                  | R.DYDVLAGR.W                     | 2 | 2.77 | 0.19 | -3.00 |
| IPI00182194 | Teneurin-2                                                                  | R.IASIKPVISETPLPVDLYR.Y          | 2 | 3.05 | 0.44 | -3.86 |
| IPI00182194 | Teneurin-2                                                                  | R.IASIKPVISETPLPVDLYR.Y          | 3 | 2.73 | 0.13 | -2.95 |
| IPI00182438 | Isoform 2 of Contactin-5 precursor                                          | K.FIYRDESVPLTPFEVK.V             | 3 | 2.73 | 0.27 | -2.16 |
| IPI00182438 | Isoform 2 of Contactin-5 precursor                                          | K.IEVHFPFTVTAAG.G                | 3 | 2.51 | 0.18 | -1.13 |
| IPI00182438 | Isoform 2 of Contactin-5 precursor                                          | R.AQASSADLM*IR.N                 | 2 | 2.81 | 0.25 | -0.61 |
| IPI00182438 | Isoform 2 of Contactin-5 precursor                                          | R.NDGVM*GEYEPK.I                 | 2 | 3.10 | 0.35 | -3.94 |
| IPI00182438 | Isoform 2 of Contactin-5 precursor                                          | R.SPFSLGWQTVK.T                  | 2 | 3.74 | 0.33 | -0.70 |
| IPI00182438 | Isoform 2 of Contactin-5 precursor                                          | R.VVATNPIGTGDPSTPSR.M            | 2 | 4.73 | 0.47 | -3.11 |
| IPI00182944 | Isoform 3 of Calcium/calmodulin-dependent protein kinase type II beta chain | K.ICDPGLTSFEPEALGNLVEGMDFHR.F    | 3 | 4.55 | 0.31 |       |
| IPI00182944 | Isoform 3 of Calcium/calmodulin-dependent protein kinase type II beta chain | K.TTEQLIEAVNNGDFEAYAK.I          | 2 | 4.90 | 0.53 | -1.54 |
| IPI00182944 | Isoform 3 of Calcium/calmodulin-dependent protein kinase type II beta chain | R.FYFENLLAK.N                    | 2 | 2.81 | 0.14 | -2.98 |
| IPI00182944 | Isoform 3 of Calcium/calmodulin-dependent protein kinase type II beta chain | R.LTQYIDGQGRPR.T                 | 2 | 2.94 | 0.17 | -3.26 |
| IPI00183002 | Isoform 1 of Protein phosphatase 1 regulatory subunit 12A                   | R.ISEM*EEELKM*LPDLK.A            | 2 | 2.20 | 0.15 |       |
| IPI00183206 | Isoform 1 of RIM-binding protein 2                                          | R.KITLIKQLAK.S                   | 2 | 2.50 | 0.16 |       |
| IPI00183321 | Isoform 1 of N-acetylgalactosamine 4-sulfate 6-O-sulfotransferase           | K.LIINSITTR.I                    | 2 | 3.08 | 0.13 | -0.75 |
| IPI00183321 | Isoform 1 of N-acetylgalactosamine 4-sulfate 6-O-sulfotransferase           | K.VFQFLNLGPLSEK.Q                | 2 | 4.16 | 0.44 | -6.63 |
| IPI00183321 | Isoform 1 of N-acetylgalactosamine 4-sulfate 6-O-sulfotransferase           | K.VFQFLNLGPLSEKQEALM*TK.S        | 2 | 2.93 | 0.40 | 0.90  |
| IPI00183321 | Isoform 1 of N-acetylgalactosamine 4-sulfate 6-O-sulfotransferase           | R.DRYPVEDYLDLFDLAAHQHQGLQASSAK.E | 4 | 5.64 | 0.51 | -4.35 |
| IPI00183321 | Isoform 1 of N-acetylgalactosamine 4-sulfate 6-O-sulfotransferase           | R.LEDHASNVK.Y                    | 2 | 2.86 | 0.22 | -2.12 |
| IPI00183321 | Isoform 1 of N-acetylgalactosamine 4-sulfate 6-O-sulfotransferase           | R.STFDALRK.A                     | 2 | 2.53 | 0.19 | -3.48 |
| IPI00183321 | Isoform 1 of N-acetylgalactosamine 4-sulfate 6-O-sulfotransferase           | R.YPVEDYLDLFDLAAHQHQGLQASSAK.E   | 4 | 3.59 | 0.14 | -3.29 |
| IPI00183445 | Isoform 1 of Latrophilin-1 precursor                                        | K.LM*EQLLDILDAQLRPIER.E          | 3 | 2.99 | 0.11 | -4.10 |
| IPI00183445 | Isoform 1 of Latrophilin-1 precursor                                        | K.SGETVINTANYHDTSPYR.W           | 2 | 5.31 | 0.62 | -3.33 |

|             |                                                                         |                                        |   |      |      |       |
|-------------|-------------------------------------------------------------------------|----------------------------------------|---|------|------|-------|
| IPI00183445 | Isoform 1 of Latrophilin-1 precursor                                    | K.VFVCPGTLQK.V                         | 2 | 2.78 | 0.28 | -2.33 |
| IPI00183445 | Isoform 1 of Latrophilin-1 precursor                                    | K.YLEVQYDCVPYK.V                       | 2 | 4.09 | 0.36 | -3.40 |
| IPI00183445 | Isoform 1 of Latrophilin-1 precursor                                    | K.YLEVQYDCVPYKVEQK.V                   | 3 | 3.49 | 0.22 | -3.08 |
| IPI00183445 | Isoform 1 of Latrophilin-1 precursor                                    | R.AGLPFGLM*R.R                         | 2 | 2.48 | 0.17 | -1.32 |
| IPI00183445 | Isoform 1 of Latrophilin-1 precursor                                    | R.CPGSDVIM*VENANYGR.T                  | 2 | 4.08 | 0.33 | -5.50 |
| IPI00183445 | Isoform 1 of Latrophilin-1 precursor                                    | R.EEPVSLTFPNPYQFISSVDYNPR.D            | 3 | 4.39 | 0.46 | -4.12 |
| IPI00183445 | Isoform 1 of Latrophilin-1 precursor                                    | R.ELACEGYPIELR.C                       | 1 | 1.78 | 0.35 | -3.29 |
| IPI00183445 | Isoform 1 of Latrophilin-1 precursor                                    | R.ELACEGYPIELR.C                       | 2 | 3.96 | 0.38 | -4.14 |
| IPI00183445 | Isoform 1 of Latrophilin-1 precursor                                    | R.IKSGETVINTANYHDTSPYR.W               | 2 | 5.95 | 0.60 | -1.83 |
| IPI00183445 | Isoform 1 of Latrophilin-1 precursor                                    | R.IKSGETVINTANYHDTSPYR.W               | 3 | 4.23 | 0.45 | -0.15 |
| IPI00183445 | Isoform 1 of Latrophilin-1 precursor                                    | R.IYVM*PWIPYR.T                        | 2 | 2.78 | 0.19 | -2.17 |
| IPI00183445 | Isoform 1 of Latrophilin-1 precursor                                    | R.LPNRV DGTGFVYD GAVFYNKER.T           | 4 | 3.21 | 0.20 | -3.35 |
| IPI00183445 | Isoform 1 of Latrophilin-1 precursor                                    | R.LVVSQLNPYTLR.F                       | 1 | 2.49 | 0.20 | -2.41 |
| IPI00183445 | Isoform 1 of Latrophilin-1 precursor                                    | R.LVVSQLNPYTLR.F                       | 2 | 4.31 | 0.40 | -3.40 |
| IPI00183445 | Isoform 1 of Latrophilin-1 precursor                                    | R.SVYVDDDSEAAAGNR.V                    | 2 | 3.58 | 0.54 | -3.78 |
| IPI00183445 | Isoform 1 of Latrophilin-1 precursor                                    | R.SVYVDDDSEAAAGNRVDYAFNTNANR.E         | 3 | 3.69 | 0.45 | -3.03 |
| IPI00183445 | Isoform 1 of Latrophilin-1 precursor                                    | R.TDDKICDADPFQM*ENVQCYL PDAFK.I        | 3 | 5.37 | 0.57 | -3.51 |
| IPI00183445 | Isoform 1 of Latrophilin-1 precursor                                    | R.TDLTEYASWEDYVAAR.H                   | 2 | 5.22 | 0.58 | -4.64 |
| IPI00183445 | Isoform 1 of Latrophilin-1 precursor                                    | R.TQCVV VAGSDAFPDPCPGTYK.Y             | 2 | 5.27 | 0.57 | -3.64 |
| IPI00183445 | Isoform 1 of Latrophilin-1 precursor                                    | R.TQCVV VAGSDAFPDPCPGTYK.Y             | 3 | 2.89 | 0.19 | -3.30 |
| IPI00183445 | Isoform 1 of Latrophilin-1 precursor                                    | R.VDYAFNTNANREEPVSLTFPNPYQFISSVDYNPR.D | 3 | 4.06 | 0.43 | -1.56 |
| IPI00183487 | Xylosyltransferase 1                                                    | K.FLVAPLTFSNR.Q                        | 2 | 3.60 | 0.32 | -2.54 |
| IPI00183487 | Xylosyltransferase 1                                                    | L.VVWNFSSLD SGAGER.R                   | 2 | 4.06 | 0.43 | -3.97 |
| IPI00183487 | Xylosyltransferase 1                                                    | N.FSSLD SGAGER.R                       | 2 | 3.08 | 0.24 | -3.34 |
| IPI00183487 | Xylosyltransferase 1                                                    | R.DLPAEPAAAR.G                         | 2 | 1.87 | 0.12 | -2.42 |
| IPI00183487 | Xylosyltransferase 1                                                    | R.FQQTARPTFFAR.K                       | 2 | 2.41 | 0.22 | -0.84 |
| IPI00183487 | Xylosyltransferase 1                                                    | R.GGAAVGGGEQPPPAPAPR.R                 | 2 | 5.08 | 0.58 | -4.56 |
| IPI00183487 | Xylosyltransferase 1                                                    | R.NAYM*EQSFQSLNPVLSLPINPAQVEQAR.R      | 3 | 4.88 | 0.32 | -4.33 |
| IPI00183487 | Xylosyltransferase 1                                                    | R.RGGAAVGGGEQPPPAPAPR.R                | 2 | 5.81 | 0.62 | -7.49 |
| IPI00183487 | Xylosyltransferase 1                                                    | R.RGGAAVGGGEQPPPAPAPR.R                | 3 | 4.10 | 0.39 | -3.70 |
| IPI00183487 | Xylosyltransferase 1                                                    | R.TNDQLVAFLSR.Y                        | 2 | 3.97 | 0.34 | -3.74 |
| IPI00184019 | Isoform 3 of Paired immunoglobulin-like type 2 receptor alpha precursor | G.SGPSYLYGVTQPK.H                      | 2 | 3.52 | 0.25 | -1.48 |
| IPI00184019 | Isoform 3 of Paired immunoglobulin-like type 2 receptor alpha precursor | K.LSITQGQQR.T                          | 2 | 2.95 | 0.16 | -0.10 |
| IPI00184019 | Isoform 3 of Paired immunoglobulin-like type 2 receptor alpha precursor | R.QQWQSIEGTK.L                         | 2 | 1.78 | 0.19 | -2.17 |
| IPI00184094 | UDP-GlcNAc:betaGal beta-1,3-N-acetylglucosaminyltransferase 8           | R.AQDDAFVHTPALLAHLR.A                  | 3 | 3.33 | 0.34 | -2.13 |
| IPI00184094 | UDP-GlcNAc:betaGal beta-1,3-N-acetylglucosaminyltransferase 8           | R.AQDDAFVHTPALLAHLR.A                  | 4 | 2.43 | 0.26 | -2.09 |

|             |                                                                                         |                                    |   |      |      |       |
|-------------|-----------------------------------------------------------------------------------------|------------------------------------|---|------|------|-------|
| IPI00184094 | UDP-GlcNAc:betaGal beta-1,3-N-acetylglucosaminyltransferase 8                           | R.NLLLVRLPQPASIR.L                 | 3 | 2.62 | 0.27 | -3.12 |
| IPI00184094 | UDP-GlcNAc:betaGal beta-1,3-N-acetylglucosaminyltransferase 8                           | W.GAAAATEIPDFASYPK.D               | 2 | 2.99 | 0.30 | -2.49 |
| IPI00184650 | Class B basic helix-loop-helix protein 4                                                | R.SRLSINARERR.R                    | 3 | 2.28 | 0.18 |       |
| IPI00184851 | Type 2 lactosamine alpha-2,3-sialyltransferase                                          | K.CVVVGNGGVLNKTLGEK.I              | 2 | 2.32 | 0.11 |       |
| IPI00184851 | Type 2 lactosamine alpha-2,3-sialyltransferase                                          | K.IASLYGSDKFDLPYGM*R.T             | 3 | 3.39 | 0.30 | -1.32 |
| IPI00184851 | Type 2 lactosamine alpha-2,3-sialyltransferase                                          | R.ILDPPFIIR.T                      | 2 | 2.64 | 0.16 | -1.72 |
| IPI00184884 | Non-structural maintenance of chromosomes element 1 homolog                             | K.VFDPEKERESGVLSNK.K               | 2 | 2.17 | 0.10 | -7.39 |
| IPI00184997 | cDNA FLJ78771, highly similar to Homo sapiens discs, large homolog 7 (Drosophila), mRNA | K.DISTEMIRTKIAHRKLSLQKENR.H        | 3 | 3.56 | 0.09 |       |
| IPI00185088 | immunoglobulin superfamily, member 11 isoform b                                         | S.LEVSESPGSIQVAR.G                 | 2 | 4.75 | 0.39 | -1.82 |
| IPI00185146 | Importin-9                                                                              | R.VLTEFTREVTDQM*PLVAPVILPEMYK.I    | 3 | 2.91 | 0.14 |       |
| IPI00185661 | Ubiquitin carboxyl-terminal hydrolase 32                                                | K.KMADTSSMDEDFESDYKK.Y             | 3 | 2.19 | 0.18 | -2.49 |
| IPI00186004 | hypothetical protein LOC57730                                                           | R.QRLETEM*QSYRCRLNAARCDHDQSHSSKR.D | 3 | 3.31 | 0.05 |       |
| IPI00186581 | amplified in osteosarcoma isoform 2 precursor                                           | K.AGM*ERELENIQETEK.E               | 2 | 1.90 | 0.06 | -3.01 |
| IPI00186621 | Orofacial clefting chromosomal breakpoint region 1                                      | K.GNEYGRNYFDPLMDEEINPRQCATEVSR.E   | 3 | 3.52 | 0.05 |       |
| IPI00186826 | Ephrin receptor                                                                         | K.VDTVAEHLTR.K                     | 3 | 2.07 | 0.30 | -0.84 |
| IPI00186903 | Isoform 2 of Apolipoprotein-L1 precursor                                                | K.ILQADQEL.-                       | 2 | 2.63 | 0.05 |       |
| IPI00186903 | Isoform 2 of Apolipoprotein-L1 precursor                                                | K.LNILNNNYK.I                      | 2 | 2.84 | 0.09 |       |
| IPI00186903 | Isoform 2 of Apolipoprotein-L1 precursor                                                | K.VAQELEEKLNILNNNYK.I              | 2 | 5.74 | 0.34 |       |
| IPI00186903 | Isoform 2 of Apolipoprotein-L1 precursor                                                | R.VTEPISAESGEQVER.V                | 2 | 4.23 | 0.42 |       |
| IPI00186903 | Isoform 2 of Apolipoprotein-L1 precursor                                                | R.VTEPISAESGEQVERVNEPSILEM*SR.G    | 3 | 4.86 | 0.34 |       |
| IPI00186966 | Isoform IIA of Myc box-dependent-interacting protein 1                                  | K.VQAQHDYTATDDELQLK.A              | 3 | 3.62 | 0.40 | -2.77 |
| IPI00187143 | Isoform 2 of Ras-related protein Rab-4B                                                 | R.FAQENELM*FLETSALTGENVEEAFLK.C    | 3 | 3.78 | 0.12 |       |
| IPI00215610 | 55 kDa erythrocyte membrane protein                                                     | R.NISANEFLEFGSYQGNMFGTK.F          | 2 | 5.25 | 0.57 | -3.18 |
| IPI00215746 | Fatty acid-binding protein, adipocyte                                                   | K.LVSSNFDDYM*KEVGVGFATR.K          | 3 | 3.41 | 0.31 | -1.65 |
| IPI00215767 | Isoform Long of Beta-1,4-galactosyltransferase 1                                        | K.FGFSLPYVQYFGGVLSLSK.Q            | 2 | 3.77 | 0.45 | -1.61 |
| IPI00215767 | Isoform Long of Beta-1,4-galactosyltransferase 1                                        | Q.LVGVSTPLQGGNSAAAIGQSSGELR.T      | 3 | 3.58 | 0.26 | -2.09 |
| IPI00215767 | Isoform Long of Beta-1,4-galactosyltransferase 1                                        | R.QQLDYGIVINQAGDTIFNR.A            | 3 | 4.72 | 0.33 | -5.82 |
| IPI00215767 | Isoform Long of Beta-1,4-galactosyltransferase 1                                        | W.GGEDDDIFNR.I                     | 2 | 3.47 | 0.35 | -2.24 |
| IPI00215777 | Isoform B of Phosphate carrier protein, mitochondrial precursor                         | K.YYALCGFGGVLSCGLTHTAVVPLDLVK.C    | 3 | 2.41 | 0.10 | -2.78 |
| IPI00215894 | Isoform LMW of Kininogen-1 precursor                                                    | C.VHPISTQSPDLEPILR.H               | 3 | 3.83 | 0.27 | 0.40  |
| IPI00215894 | Isoform LMW of Kininogen-1 precursor                                                    | D.IPTNSPELEETLTHITK.L              | 3 | 4.68 | 0.54 | -3.17 |
| IPI00215894 | Isoform LMW of Kininogen-1 precursor                                                    | I.GEIKEETTSHLR.S                   | 2 | 3.10 | 0.30 | -0.91 |
| IPI00215894 | Isoform LMW of Kininogen-1 precursor                                                    | I.GEIKEETTSHLR.S                   | 3 | 3.87 | 0.42 | -3.02 |
| IPI00215894 | Isoform LMW of Kininogen-1 precursor                                                    | I.PTNSPELEETLTHITK.L               | 2 | 5.22 | 0.57 | -3.52 |
| IPI00215894 | Isoform LMW of Kininogen-1 precursor                                                    | I.PTNSPELEETLTHITK.L               | 3 | 4.29 | 0.40 | -3.93 |

|             |                                      |                                                 |   |      |      |       |
|-------------|--------------------------------------|-------------------------------------------------|---|------|------|-------|
| IPI00215894 | Isoform LMW of Kininogen-1 precursor | K.AATGECTATVGK.R                                | 2 | 3.81 | 0.46 | -4.72 |
| IPI00215894 | Isoform LMW of Kininogen-1 precursor | K.AATGECTATVGK.R.S                              | 2 | 3.43 | 0.38 | -4.18 |
| IPI00215894 | Isoform LMW of Kininogen-1 precursor | K.AGAEPASEREVS.-                                | 1 | 1.82 | 0.29 | -3.65 |
| IPI00215894 | Isoform LMW of Kininogen-1 precursor | K.AGAEPASEREVS.-                                | 2 | 2.91 | 0.35 | -3.10 |
| IPI00215894 | Isoform LMW of Kininogen-1 precursor | K.AVDAALKK.Y                                    | 2 | 2.72 | 0.20 | -4.79 |
| IPI00215894 | Isoform LMW of Kininogen-1 precursor | K.DFVQPPTK.I                                    | 1 | 1.67 | 0.06 | -2.56 |
| IPI00215894 | Isoform LMW of Kininogen-1 precursor | K.DFVQPPTK.I                                    | 2 | 2.48 | 0.15 | -4.19 |
| IPI00215894 | Isoform LMW of Kininogen-1 precursor | K.EETTSHLR.S                                    | 1 | 1.86 | 0.21 | -2.16 |
| IPI00215894 | Isoform LMW of Kininogen-1 precursor | K.ENFLFLTPDCK.S                                 | 1 | 3.27 | 0.29 | -3.78 |
| IPI00215894 | Isoform LMW of Kininogen-1 precursor | K.ENFLFLTPDCK.S                                 | 2 | 4.01 | 0.31 | -3.73 |
| IPI00215894 | Isoform LMW of Kininogen-1 precursor | K.FSVATQTCQITPAEGPVVTAQYDCLGCVHPISTQSPDLEPILR.H | 3 | 4.34 | 0.53 | -3.40 |
| IPI00215894 | Isoform LMW of Kininogen-1 precursor | K.FSVATQTCQITPAEGPVVTAQYDCLGCVHPISTQSPDLEPILR.H | 4 | 5.64 | 0.52 | -2.18 |
| IPI00215894 | Isoform LMW of Kininogen-1 precursor | K.GRPPKAGAEPASER.E                              | 3 | 2.65 | 0.24 | -2.15 |
| IPI00215894 | Isoform LMW of Kininogen-1 precursor | K.GRPPKAGAEPASEREVS.-                           | 2 | 2.17 | 0.35 | -5.18 |
| IPI00215894 | Isoform LMW of Kininogen-1 precursor | K.IYPTVNCQPLGM*ISLM*K.R                         | 2 | 5.10 | 0.49 | -3.81 |
| IPI00215894 | Isoform LMW of Kininogen-1 precursor | K.IYPTVNCQPLGM*ISLM*K.R                         | 3 | 3.71 | 0.45 | -6.75 |
| IPI00215894 | Isoform LMW of Kininogen-1 precursor | K.IYPTVNCQPLGMISLM*K.R                          | 2 | 5.46 | 0.17 |       |
| IPI00215894 | Isoform LMW of Kininogen-1 precursor | K.IYPTVNCQPLGMISLMK.R                           | 2 | 3.48 | 0.29 |       |
| IPI00215894 | Isoform LMW of Kininogen-1 precursor | K.KIYPTVNCQPLGM*ISLM*.K                         | 2 | 4.17 | 0.47 | -2.21 |
| IPI00215894 | Isoform LMW of Kininogen-1 precursor | K.KIYPTVNCQPLGM*ISLM*K.R                        | 2 | 3.85 | 0.42 | -4.40 |
| IPI00215894 | Isoform LMW of Kininogen-1 precursor | K.KIYPTVNCQPLGM*ISLM*K.R                        | 3 | 4.31 | 0.31 | -5.44 |
| IPI00215894 | Isoform LMW of Kininogen-1 precursor | K.KLGQSLDCNAEVYVVPWEK.K                         | 2 | 4.84 | 0.35 |       |
| IPI00215894 | Isoform LMW of Kininogen-1 precursor | K.KLGQSLDCNAEVYVVPWEK.I                         | 3 | 4.40 | 0.28 |       |
| IPI00215894 | Isoform LMW of Kininogen-1 precursor | K.KYFIDFVAR.E                                   | 1 | 2.82 | 0.27 | -3.27 |
| IPI00215894 | Isoform LMW of Kininogen-1 precursor | K.KYFIDFVAR.E                                   | 2 | 3.13 | 0.35 | -3.25 |
| IPI00215894 | Isoform LMW of Kininogen-1 precursor | K.KYNSQNSNNQFVLYR.I                             | 2 | 5.50 | 0.47 | -4.39 |
| IPI00215894 | Isoform LMW of Kininogen-1 precursor | K.KYNSQNSNNQFVLYR.I                             | 3 | 4.59 | 0.43 | -2.89 |
| IPI00215894 | Isoform LMW of Kininogen-1 precursor | K.LGQSLDCNAEVYVVPWEK.K                          | 2 | 5.04 | 0.47 | -5.49 |
| IPI00215894 | Isoform LMW of Kininogen-1 precursor | K.LGQSLDCNAEVYVVPWEK.I                          | 3 | 4.20 | 0.37 | -1.56 |
| IPI00215894 | Isoform LMW of Kininogen-1 precursor | K.RPPGFSPFR.S                                   | 1 | 1.59 | 0.30 | -5.39 |
| IPI00215894 | Isoform LMW of Kininogen-1 precursor | K.RPPGFSPFR.S                                   | 2 | 2.67 | 0.22 | -3.42 |
| IPI00215894 | Isoform LMW of Kininogen-1 precursor | K.SLWNGDTGECTDNAYIDIQLR.I                       | 2 | 5.24 | 0.56 | -4.45 |
| IPI00215894 | Isoform LMW of Kininogen-1 precursor | K.SLWNGDTGECTDNAYIDIQLR.I                       | 3 | 3.79 | 0.06 |       |
| IPI00215894 | Isoform LMW of Kininogen-1 precursor | K.TVGSDFYSFK.Y                                  | 1 | 2.61 | 0.30 | -1.83 |
| IPI00215894 | Isoform LMW of Kininogen-1 precursor | K.TVGSDFYSFK.Y                                  | 2 | 3.86 | 0.46 | -1.80 |
| IPI00215894 | Isoform LMW of Kininogen-1 precursor | K.TVGSDFYSFKYEIK.E                              | 2 | 4.11 | 0.39 | -4.98 |
| IPI00215894 | Isoform LMW of Kininogen-1 precursor | K.TWQDCEYK.D                                    | 2 | 2.03 | 0.11 | -2.56 |
| IPI00215894 | Isoform LMW of Kininogen-1 precursor | K.TWQDCEYKDAK.A                                 | 2 | 3.78 | 0.23 |       |
| IPI00215894 | Isoform LMW of Kininogen-1 precursor | K.YEIKEGDCPVQSGK.T                              | 2 | 4.78 | 0.36 |       |
| IPI00215894 | Isoform LMW of Kininogen-1 precursor | K.YFIDFVAR.E                                    | 1 | 2.65 | 0.33 | -4.15 |
| IPI00215894 | Isoform LMW of Kininogen-1 precursor | K.YFIDFVAR.E                                    | 2 | 3.44 | 0.35 | -3.76 |
| IPI00215894 | Isoform LMW of Kininogen-1 precursor | K.YNSQNSNNQFVLYR.I                              | 2 | 4.61 | 0.38 | -3.21 |



|             |                                                                  |                                |   |      |      |       |
|-------------|------------------------------------------------------------------|--------------------------------|---|------|------|-------|
| IPI00215894 | Isoform LMW of Kininogen-1 precursor                             | K.YNSQNSNNQFVLYR.I             | 3 | 5.37 | 0.47 | -3.89 |
| IPI00215894 | Isoform LMW of Kininogen-1 precursor                             | R.DIPTNSPELEETLTHITK.L         | 2 | 4.59 | 0.51 | -4.42 |
| IPI00215894 | Isoform LMW of Kininogen-1 precursor                             | R.IASFQNCDIYPGKDFVQPPTK.I      | 2 | 4.15 | 0.55 | -2.76 |
| IPI00215894 | Isoform LMW of Kininogen-1 precursor                             | R.IASFQNCDIYPGKDFVQPPTK.I      | 3 | 4.84 | 0.54 | -4.44 |
| IPI00215894 | Isoform LMW of Kininogen-1 precursor                             | R.IASFQNCDIYPGKDFVQPPTK.I      | 4 | 3.08 | 0.17 | -3.36 |
| IPI00215894 | Isoform LMW of Kininogen-1 precursor                             | R.IGEIKEETTSHLR.S              | 1 | 3.59 | 0.38 | -1.49 |
| IPI00215894 | Isoform LMW of Kininogen-1 precursor                             | R.IGEIKEETTSHLR.S              | 2 | 4.13 | 0.39 | -6.10 |
| IPI00215894 | Isoform LMW of Kininogen-1 precursor                             | R.IGEIKEETTSHLR.S              | 3 | 5.01 | 0.42 | -3.12 |
| IPI00215894 | Isoform LMW of Kininogen-1 precursor                             | R.QVVAGLNFR.I                  | 1 | 1.97 | 0.18 | -1.97 |
| IPI00215894 | Isoform LMW of Kininogen-1 precursor                             | R.QVVAGLNFR.I                  | 2 | 2.47 | 0.33 | -3.28 |
| IPI00215894 | Isoform LMW of Kininogen-1 precursor                             | R.VQVVAGK.K                    | 1 | 2.43 | 0.10 | -3.23 |
| IPI00215899 | Isoform 2 of Sushi repeat-containing protein SRPX precursor      | R.DTADGILTDVILK.G              | 2 | 4.45 | 0.36 | -4.61 |
| IPI00215914 | ADP-ribosylation factor 1                                        | R.MLAEDELRDVLLVFANK.Q          | 2 | 2.94 | 0.39 | -3.07 |
| IPI00215914 | ADP-ribosylation factor 1                                        | R.MLAEDELRDVLLVFANK.Q          | 3 | 4.19 | 0.33 | -1.90 |
| IPI00215979 | Bisphosphoglycerate mutase                                       | R.AVGPHQLGDQEAIAQAIK.K         | 3 | 2.63 | 0.13 | -1.87 |
| IPI00215980 | Isoform Alpha of Poliovirus receptor-related protein 2 precursor | R.FTLVPSGR.A                   | 2 | 2.27 | 0.12 | -2.66 |
| IPI00215980 | Isoform Alpha of Poliovirus receptor-related protein 2 precursor | R.TDATALSCDVR.S                | 2 | 3.24 | 0.21 | -3.61 |
| IPI00215983 | Carbonic anhydrase 1                                             | K.ADGLAVIGVLM*K.V              | 2 | 3.09 | 0.34 | -3.20 |
| IPI00215983 | Carbonic anhydrase 1                                             | K.EIINVGHSFHVNFEDNDNR.S        | 2 | 4.28 | 0.39 | -4.05 |
| IPI00215983 | Carbonic anhydrase 1                                             | K.EIINVGHSFHVNFEDNDNR.S        | 3 | 2.74 | 0.27 | -4.54 |
| IPI00215983 | Carbonic anhydrase 1                                             | K.ESISVSSEQLAQFR.S             | 2 | 3.33 | 0.32 | -4.54 |
| IPI00215983 | Carbonic anhydrase 1                                             | K.GGPFSDSYR.L                  | 2 | 2.37 | 0.15 | -0.92 |
| IPI00215983 | Carbonic anhydrase 1                                             | K.LYPIANGNNQSPVDIK.T           | 2 | 4.20 | 0.33 | -4.55 |
| IPI00215983 | Carbonic anhydrase 1                                             | K.TSETKHDTSLKPISVSYNPATAK.E    | 2 | 5.19 | 0.50 | -3.58 |
| IPI00215983 | Carbonic anhydrase 1                                             | K.TSETKHDTSLKPISVSYNPATAK.E    | 3 | 4.53 | 0.46 | -3.54 |
| IPI00215983 | Carbonic anhydrase 1                                             | K.VLDALQAIK.T                  | 2 | 3.86 | 0.26 | -1.76 |
| IPI00215983 | Carbonic anhydrase 1                                             | K.YSSLAEAASK.A                 | 1 | 2.57 | 0.32 | -1.98 |
| IPI00215983 | Carbonic anhydrase 1                                             | R.SLLSNVEGDNAVPM*QHNNRPTQPLK.G | 3 | 3.99 | 0.35 | -3.39 |
| IPI00215997 | CD9 antigen                                                      | K.KDVLETFTVK.S                 | 2 | 2.90 | 0.18 | -2.72 |
| IPI00215997 | CD9 antigen                                                      | K.TKDEPQRETLK.A                | 2 | 3.26 | 0.13 | -3.50 |
| IPI00216049 | Isoform 1 of Heterogeneous nuclear ribonucleoprotein K           | K.LFQECCPHSTDRVVLIGGKPD.R.V    | 3 | 2.25 | 0.19 | -6.53 |
| IPI00216106 | Isoform 3 of Obg-like ATPase 1                                   | K.IPAFLNVVDIAGLVK.G            | 2 | 4.70 | 0.35 | -4.39 |
| IPI00216138 | Transgelin                                                       | K.IEKKYDEELEER.L               | 3 | 4.10 | 0.36 | -2.52 |
| IPI00216138 | Transgelin                                                       | K.LVNSLYPDGSKPVKVPENPPSM*VFK.Q | 3 | 4.75 | 0.47 | -3.95 |
| IPI00216138 | Transgelin                                                       | K.QM*EQVAQFLK.A                | 2 | 2.64 | 0.11 | -4.04 |
| IPI00216138 | Transgelin                                                       | R.EFTESQLQEGK.H                | 2 | 2.62 | 0.19 | -2.26 |
| IPI00216138 | Transgelin                                                       | R.GASQAGM*TTYGR.P              | 2 | 3.10 | 0.25 | -3.14 |
| IPI00216171 | Gamma-enolase                                                    | K.ACNCLLLK.V                   | 2 | 2.34 | 0.07 | -0.79 |

|             |                                           |                                              |   |      |      |       |
|-------------|-------------------------------------------|----------------------------------------------|---|------|------|-------|
| IPI00216171 | Gamma-enolase                             | K.AVDHINSTIAPALISSGLSVVEQEKLNDLM*LELDGTENK.S | 4 | 6.14 | 0.49 | -5.34 |
| IPI00216171 | Gamma-enolase                             | K.DATNVGDEGGFAPNILENSEALELVK.E               | 2 | 5.19 | 0.52 | -1.08 |
| IPI00216171 | Gamma-enolase                             | K.DATNVGDEGGFAPNILENSEALELVK.E               | 3 | 3.99 | 0.40 | -2.48 |
| IPI00216171 | Gamma-enolase                             | K.DATNVGDEGGFAPNILENSEALELVKEAIDKAGYTEK.I    | 4 | 3.49 | 0.31 | -4.15 |
| IPI00216171 | Gamma-enolase                             | K.DKYGKDATNVGDEGGFAPNILENSEALELVK.E          | 3 | 3.69 | 0.30 | -0.69 |
| IPI00216171 | Gamma-enolase                             | K.EAIDKAGYTEK.I                              | 2 | 1.95 | 0.17 | -4.10 |
| IPI00216171 | Gamma-enolase                             | K.FTANVGIVGDDLTVTNPK.R                       | 2 | 4.76 | 0.50 | -4.69 |
| IPI00216171 | Gamma-enolase                             | K.FTANVGIVGDDLTVTNPK.R                       | 3 | 3.80 | 0.37 | -3.84 |
| IPI00216171 | Gamma-enolase                             | K.IVIGM*DVAASEFYR.D                          | 2 | 4.12 | 0.46 | -4.55 |
| IPI00216171 | Gamma-enolase                             | K.LAM*QEFM*ILPVGAEFR.D                       | 3 | 3.67 | 0.33 | -2.83 |
| IPI00216171 | Gamma-enolase                             | K.LAQENGWGVV*VSHR.S                          | 2 | 2.73 | 0.33 | -1.76 |
| IPI00216171 | Gamma-enolase                             | K.VNQIGSVTEAIQACK.L                          | 2 | 3.77 | 0.45 | -2.39 |
| IPI00216171 | Gamma-enolase                             | K.YGKDATNVGDEGGFAPNILENSEALELVK.E            | 3 | 5.81 | 0.56 | -2.59 |
| IPI00216171 | Gamma-enolase                             | K.YNQLM*R.I                                  | 2 | 2.01 | 0.11 | -2.49 |
| IPI00216171 | Gamma-enolase                             | R.AAVPSGASTGIYEALR.D                         | 2 | 5.65 | 0.33 | -8.46 |
| IPI00216171 | Gamma-enolase                             | R.AAVPSGASTGIYEALR.D                         | 3 | 4.37 | 0.39 | -3.26 |
| IPI00216171 | Gamma-enolase                             | R.DGKYDLDFK.S                                | 2 | 2.31 | 0.19 | -1.26 |
| IPI00216171 | Gamma-enolase                             | R.DGKYDLDFKSPTDPSR.Y                         | 3 | 3.02 | 0.36 | -2.07 |
| IPI00216171 | Gamma-enolase                             | R.FAGHNFR.N                                  | 2 | 1.79 | 0.05 | -3.59 |
| IPI00216171 | Gamma-enolase                             | R.GNPTVEVDLYTAK.G                            | 1 | 2.42 | 0.11 | -3.08 |
| IPI00216171 | Gamma-enolase                             | R.GNPTVEVDLYTAK.G                            | 2 | 3.65 | 0.23 | -3.79 |
| IPI00216171 | Gamma-enolase                             | R.HIAQLAGNSDLILPVPFNVINGGSHAGNK.L            | 3 | 4.96 | 0.38 | -6.02 |
| IPI00216171 | Gamma-enolase                             | R.IEEELGDEAR.F                               | 2 | 3.97 | 0.12 | -1.74 |
| IPI00216171 | Gamma-enolase                             | R.LGAEVYHTLK.G                               | 2 | 3.51 | 0.26 | -3.28 |
| IPI00216171 | Gamma-enolase                             | R.SGETEDTFIADLVVGLCTGQIK.T                   | 2 | 5.97 | 0.60 | -5.74 |
| IPI00216171 | Gamma-enolase                             | R.SGETEDTFIADLVVGLCTGQIK.T                   | 3 | 4.50 | 0.40 | -3.18 |
| IPI00216171 | Gamma-enolase                             | R.YITGDQLGALYQDFVR.D                         | 2 | 6.01 | 0.55 | -3.48 |
| IPI00216171 | Gamma-enolase                             | R.YITGDQLGALYQDFVR.D                         | 3 | 5.86 | 0.28 | -2.93 |
| IPI00216171 | Gamma-enolase                             | T.IAPALISSGLSVVEQEKLNDLMLELDGTENK.S          | 3 | 5.44 | 0.45 | -2.67 |
| IPI00216288 | Isoform 3 of Lethal                       | R.VGDRAGVTVLKTAGSRCPPQR.H                    | 3 | 2.48 | 0.20 |       |
| IPI00216298 | Thioredoxin                               | K.CM*PTFQFFK.K                               | 2 | 2.29 | 0.22 | -1.07 |
| IPI00216298 | Thioredoxin                               | K.EKLEATINELV.-                              | 2 | 3.52 | 0.36 | -2.62 |
| IPI00216298 | Thioredoxin                               | K.LEATINELV.-                                | 2 | 2.49 | 0.06 | -2.49 |
| IPI00216298 | Thioredoxin                               | K.M*IKPFFHSLSEK.Y                            | 2 | 2.70 | 0.15 | -3.33 |
| IPI00216298 | Thioredoxin                               | K.TAFQEALDAAGDK.L                            | 2 | 4.13 | 0.31 | -3.26 |
| IPI00216298 | Thioredoxin                               | K.VGEFSGANK.E                                | 1 | 2.29 | 0.25 | -2.85 |
| IPI00216298 | Thioredoxin                               | K.VGEFSGANKEK.L                              | 2 | 2.71 | 0.19 | -3.61 |
| IPI00216318 | Isoform Long of 14-3-3 protein beta/alpha | K.AVTEQGHLSNEER.N                            | 2 | 4.58 | 0.48 | -2.63 |
| IPI00216318 | Isoform Long of 14-3-3 protein beta/alpha | K.AVTEQGHLSNEER.N                            | 3 | 2.78 | 0.36 | -2.03 |
| IPI00216318 | Isoform Long of 14-3-3 protein beta/alpha | K.IEAELQDICNDVLELLDKYLIPNATQPESK.V           | 3 | 3.87 | 0.27 | -3.54 |
| IPI00216318 | Isoform Long of 14-3-3 protein beta/alpha | K.TAFDEAIAELDTLNEESYKDSTLIM*QLLR.D           | 3 | 5.69 | 0.50 | -4.96 |
| IPI00216318 | Isoform Long of 14-3-3 protein beta/alpha | K.TAFDEAIAELDTLNEESYKDSTLIM*QLLR.D           | 4 | 5.37 | 0.43 | -4.47 |

|             |                                                                    |                                         |   |      |      |       |
|-------------|--------------------------------------------------------------------|-----------------------------------------|---|------|------|-------|
| IPI00216318 | Isoform Long of 14-3-3 protein beta/alpha                          | K.TAFDEAIAELDTLNESYKDSTLIMQLLR.D        | 3 | 2.32 | 0.14 | -1.58 |
| IPI00216318 | Isoform Long of 14-3-3 protein beta/alpha                          | R.DNLTWLTSENQGDGEGEEN.-                 | 2 | 3.71 | 0.56 | -5.42 |
| IPI00216318 | Isoform Long of 14-3-3 protein beta/alpha                          | R.EKIEAELQDICNDVLELLDK.Y                | 3 | 5.24 | 0.37 | -2.90 |
| IPI00216318 | Isoform Long of 14-3-3 protein beta/alpha                          | R.LGLALNFSVFYYEILNSPEK.A                | 2 | 4.16 | 0.55 | -2.27 |
| IPI00216318 | Isoform Long of 14-3-3 protein beta/alpha                          | R.NLLSVAYK.N                            | 1 | 1.68 | 0.08 | -2.46 |
| IPI00216318 | Isoform Long of 14-3-3 protein beta/alpha                          | R.NLLSVAYK.N                            | 2 | 2.28 | 0.09 | -1.47 |
| IPI00216318 | Isoform Long of 14-3-3 protein beta/alpha                          | R.YDDM*AAAM*K.A                         | 2 | 3.02 | 0.26 | -2.31 |
| IPI00216318 | Isoform Long of 14-3-3 protein beta/alpha                          | R.YLSEVASGDNK.Q                         | 2 | 3.19 | 0.23 | -3.83 |
| IPI00216318 | Isoform Long of 14-3-3 protein beta/alpha                          | R.YLSEVASGDNKQTTVSNSQQAYQEAFFEISKK.E    | 4 | 3.28 | 0.11 | -2.05 |
| IPI00216319 | 14-3-3 protein eta                                                 | K.AVTELNEPLSNEDRNLLSVAYK.N              | 3 | 3.30 | 0.10 | -3.04 |
| IPI00216319 | 14-3-3 protein eta                                                 | K.M*KGDYYR.Y                            | 2 | 2.25 | 0.17 | -2.86 |
| IPI00216319 | 14-3-3 protein eta                                                 | K.QAFDDAIAELDTLNEDSYKDSTLIM*QLLR.D      | 3 | 4.41 | 0.42 | -4.45 |
| IPI00216319 | 14-3-3 protein eta                                                 | R.DNLTWLTSDQQDEEAGEGN.-                 | 2 | 4.24 | 0.43 | -3.86 |
| IPI00216319 | 14-3-3 protein eta                                                 | R.NLLSVAYK.N                            | 1 | 1.68 | 0.08 | -2.46 |
| IPI00216319 | 14-3-3 protein eta                                                 | R.NLLSVAYK.N                            | 2 | 2.28 | 0.09 | -1.47 |
| IPI00216319 | 14-3-3 protein eta                                                 | R.YDDM*ASAM*K.A                         | 2 | 3.30 | 0.37 | -2.32 |
| IPI00216348 | Isoform 2C of Cytoplasmic dynein 1 intermediate chain 2            | K.SVSTPSEAGSQDSGDGAVGSR.R               | 2 | 4.19 | 0.50 | -2.81 |
| IPI00216348 | Isoform 2C of Cytoplasmic dynein 1 intermediate chain 2            | R.LAQIREEK.K                            | 2 | 2.09 | 0.09 | -2.32 |
| IPI00216457 | Histone H2A type 2-A                                               | R.AGLQFPVGR.I                           | 2 | 2.49 | 0.10 | -2.97 |
| IPI00216457 | Histone H2A type 2-A                                               | R.HLQLAIRNDEELNKLKLVIAQGGVLPNIQAVLLPK.K | 4 | 3.02 | 0.27 | -2.89 |
| IPI00216457 | Histone H2A type 2-A                                               | R.HLQLAIRNDEELNKLKLVIAQGGVLPNIQAVLLPK.K | 5 | 2.23 | 0.19 | -3.80 |
| IPI00216457 | Histone H2A type 2-A                                               | R.VGAGAPVYMAAVLEYLTAIEILELAGNAARDNKK.T  | 4 | 5.34 | 0.49 | -4.54 |
| IPI00216457 | Histone H2A type 2-A                                               | R.VGAGAPVYMAAVLEYLTAIEILELAGNAARDNKK.T  | 5 | 3.60 | 0.15 | -4.19 |
| IPI00216457 | Histone H2A type 2-A                                               | R.VTIAQGGVLPNIQAVLLPK.K                 | 2 | 4.34 | 0.48 | -3.79 |
| IPI00216461 | Acylophosphatase-2                                                 | R.M*YTEDEAR.K                           | 2 | 2.12 | 0.17 | -0.63 |
| IPI00216461 | Acylophosphatase-2                                                 | R.M*YTEDEARK.I                          | 2 | 1.88 | 0.07 | -0.83 |
| IPI00216470 | Isoform 1 of Phosphatidylinositol-5-phosphate 4-kinase type-2 beta | -.MSSNCTSTTAVAVAPLSASKTKTK.K            | 3 | 2.77 | 0.18 |       |
| IPI00216508 | Isoform 2 of Sorting nexin-3                                       | K.VAGHPLAQNER.C                         | 2 | 2.50 | 0.36 | -1.72 |
| IPI00216572 | BarH-like homeobox 2                                               | K.WKKMVLKGGQEAPTKPK.G                   | 2 | 2.71 | 0.05 | -8.59 |
| IPI00216592 | Isoform C1 of Heterogeneous nuclear ribonucleoproteins C1/C2       | K.GFAFVQYVNER.N                         | 2 | 1.70 | 0.06 | -2.77 |
| IPI00216602 | Isoform 5 of Fibroblast growth factor receptor 2 precursor         | K.DAAVISWTK.D                           | 1 | 2.19 | 0.18 | -1.51 |
| IPI00216602 | Isoform 5 of Fibroblast growth factor receptor 2 precursor         | K.DAAVISWTK.D                           | 2 | 3.28 | 0.24 | -0.79 |
| IPI00216602 | Isoform 5 of Fibroblast growth factor receptor 2 precursor         | R.CLLKDAAVISWTK.D                       | 2 | 3.61 | 0.32 | -3.62 |
| IPI00216602 | Isoform 5 of Fibroblast growth factor receptor 2 precursor         | R.CPAGGNPM*PTM*R.W                      | 2 | 2.89 | 0.28 | -2.76 |

|             |                                                            |                                               |   |      |      |       |
|-------------|------------------------------------------------------------|-----------------------------------------------|---|------|------|-------|
| IPI00216602 | Isoform 5 of Fibroblast growth factor receptor 2 precursor | R.DSGLYACTASR.T                               | 1 | 2.65 | 0.39 | -2.66 |
| IPI00216602 | Isoform 5 of Fibroblast growth factor receptor 2 precursor | R.DSGLYACTASR.T                               | 2 | 3.92 | 0.46 | -1.83 |
| IPI00216602 | Isoform 5 of Fibroblast growth factor receptor 2 precursor | R.LHAVPAANTVK.F                               | 1 | 2.52 | 0.25 | -3.72 |
| IPI00216602 | Isoform 5 of Fibroblast growth factor receptor 2 precursor | R.TVLIGEYLQIK.G                               | 1 | 2.72 | 0.20 | -4.20 |
| IPI00216602 | Isoform 5 of Fibroblast growth factor receptor 2 precursor | R.TVLIGEYLQIK.G                               | 2 | 3.72 | 0.31 | -5.86 |
| IPI00216651 | Isoform 1 of Interleukin-28 receptor alpha chain precursor | K.YEVAFWK.E                                   | 2 | 1.13 | 0.07 | 2.44  |
| IPI00216683 | M-phase inducer phosphatase 3                              | K.FLGDSANLSILSGGTPKR.C                        | 2 | 2.16 | 0.16 |       |
| IPI00216691 | Profilin-1                                                 | K.DSPSVWAAVPGK.T                              | 2 | 2.53 | 0.18 | -3.33 |
| IPI00216691 | Profilin-1                                                 | K.STGGAPTFNVTVTK.T                            | 2 | 3.53 | 0.35 | -2.61 |
| IPI00216691 | Profilin-1                                                 | K.TDKTLVLLM*GK.E                              | 2 | 3.28 | 0.33 | -2.72 |
| IPI00216691 | Profilin-1                                                 | K.TDKTLVLLM*GK.E                              | 3 | 3.41 | 0.14 | -3.30 |
| IPI00216691 | Profilin-1                                                 | K.TFVNITPAEVGVLVGK.D                          | 2 | 2.48 | 0.17 | -3.95 |
| IPI00216691 | Profilin-1                                                 | K.TFVNITPAEVGVLVGKDR.S                        | 2 | 4.24 | 0.36 | -2.80 |
| IPI00216691 | Profilin-1                                                 | K.TLVLLM*GK.E                                 | 2 | 2.88 | 0.26 | -2.56 |
| IPI00216691 | Profilin-1                                                 | R.DSLLQDGEFSM*DLR.T                           | 3 | 3.41 | 0.20 | -3.05 |
| IPI00216691 | Profilin-1                                                 | R.DSLLQDGEFSMDLR.T                            | 2 | 4.91 | 0.48 | -3.71 |
| IPI00216691 | Profilin-1                                                 | R.TKSTGGAPTFNVTVTK.T                          | 3 | 3.05 | 0.34 | 1.76  |
| IPI00216694 | plastin 3                                                  | K.M*INLSVPTIDER.T                             | 2 | 3.99 | 0.32 | -2.96 |
| IPI00216694 | plastin 3                                                  | R.AESM*LQQADK.L                               | 2 | 2.38 | 0.06 | -2.25 |
| IPI00216697 | Isoform Er1 of Ankyrin-1                                   | K.FLLENGANQNVATEDGFTPLAVALQQGHENVVAHLINYGTK.G | 4 | 3.30 | 0.09 | -5.18 |
| IPI00216697 | Isoform Er1 of Ankyrin-1                                   | K.LVYANECANFTTNVSAR.F                         | 2 | 2.94 | 0.20 | -5.01 |
| IPI00216697 | Isoform Er1 of Ankyrin-1                                   | K.MAVISEHLGLSWAELAR.E                         | 2 | 4.56 | 0.53 | -7.68 |
| IPI00216697 | Isoform Er1 of Ankyrin-1                                   | K.MAVISEHLGLSWAELAR.E                         | 3 | 5.74 | 0.48 | -5.66 |
| IPI00216697 | Isoform Er1 of Ankyrin-1                                   | K.TGASIDAVTESGLTPLHVASFMGHLPVK.N              | 3 | 4.08 | 0.40 | -3.47 |
| IPI00216697 | Isoform Er1 of Ankyrin-1                                   | K.TGASIDAVTESGLTPLHVASFMGHLPVK.N              | 4 | 4.55 | 0.43 | -3.53 |
| IPI00216697 | Isoform Er1 of Ankyrin-1                                   | K.TGFTPLHIAAHYENLNVAQLLLNR.G                  | 2 | 5.27 | 0.55 | -3.28 |
| IPI00216697 | Isoform Er1 of Ankyrin-1                                   | K.TGFTPLHIAAHYENLNVAQLLLNR.G                  | 3 | 7.07 | 0.54 | -4.83 |
| IPI00216697 | Isoform Er1 of Ankyrin-1                                   | K.TGFTPLHIAAHYENLNVAQLLLNR.G                  | 4 | 4.24 | 0.32 | -7.72 |
| IPI00216697 | Isoform Er1 of Ankyrin-1                                   | K.VVTDETSFVLVSDK.H                            | 2 | 4.30 | 0.45 | -1.71 |
| IPI00216697 | Isoform Er1 of Ankyrin-1                                   | R.DIEVLEGM*SLFAELSGNLVPVK.K                   | 2 | 4.13 | 0.47 | -5.42 |
| IPI00216697 | Isoform Er1 of Ankyrin-1                                   | R.DIEVLEGM*SLFAELSGNLVPVK.K                   | 3 | 2.40 | 0.11 | -4.66 |
| IPI00216697 | Isoform Er1 of Ankyrin-1                                   | R.DIEVLEGM*SLFAELSGNLVPVKK.A                  | 3 | 3.27 | 0.27 | -5.55 |
| IPI00216697 | Isoform Er1 of Ankyrin-1                                   | R.DIEVLEGM*SLFAELSGNLVPVK.K                   | 2 | 5.21 | 0.55 | -5.79 |
| IPI00216697 | Isoform Er1 of Ankyrin-1                                   | R.DIEVLEGM*SLFAELSGNLVPVK.K                   | 3 | 4.75 | 0.42 | -4.79 |
| IPI00216697 | Isoform Er1 of Ankyrin-1                                   | R.DIEVLEGM*SLFAELSGNLVPVKK.A                  | 2 | 4.13 | 0.50 | -4.53 |
| IPI00216697 | Isoform Er1 of Ankyrin-1                                   | R.DIEVLEGM*SLFAELSGNLVPVKK.A                  | 3 | 4.09 | 0.40 | -6.18 |

|             |                                               |                                                |   |      |      |       |
|-------------|-----------------------------------------------|------------------------------------------------|---|------|------|-------|
| IPI00216697 | Isoform Er1 of Ankyrin-1                      | R.ELVNYGANVNAQSQK.G                            | 2 | 3.61 | 0.32 | -2.04 |
| IPI00216697 | Isoform Er1 of Ankyrin-1                      | R.IIALGPTGAQFLSPVIVEIPHFASHGR.G                | 4 | 4.25 | 0.38 | -2.85 |
| IPI00216697 | Isoform Er1 of Ankyrin-1                      | R.LLCSVIGGTDQAQWEDITGTTK.L                     | 2 | 6.06 | 0.61 | -5.64 |
| IPI00216697 | Isoform Er1 of Ankyrin-1                      | R.LLCSVIGGTDQAQWEDITGTTK.L                     | 3 | 2.90 | 0.26 | -3.87 |
| IPI00216697 | Isoform Er1 of Ankyrin-1                      | R.LLLQYDAEIDDITLDHLTPL.H                       | 2 | 3.77 | 0.45 | -3.48 |
| IPI00216697 | Isoform Er1 of Ankyrin-1                      | R.LLLQYDAEIDDITLDHLTPLHVAHCGHHR.V              | 3 | 3.37 | 0.31 | -4.71 |
| IPI00216697 | Isoform Er1 of Ankyrin-1                      | R.LLLQYDAEIDDITLDHLTPLHVAHCGHHR.V              | 5 | 3.76 | 0.36 | -4.22 |
| IPI00216697 | Isoform Er1 of Ankyrin-1                      | R.LLLQYDAEIDDITLDHLTPLHVAHCGHHR.V              | 6 | 3.88 | 0.35 | -4.48 |
| IPI00216697 | Isoform Er1 of Ankyrin-1                      | R.SLLQYGGSSANAESVQGVTPHLHAAQEGHAEM*VALLLSK.Q   | 4 | 3.28 | 0.14 | -4.71 |
| IPI00216697 | Isoform Er1 of Ankyrin-1                      | R.SLLQYGGSSANAESVQGVTPHLHAAQEGHAEMVALLLSK.Q    | 3 | 6.84 | 0.63 | -6.56 |
| IPI00216697 | Isoform Er1 of Ankyrin-1                      | R.SLLQYGGSSANAESVQGVTPHLHAAQEGHAEMVALLLSK.Q    | 4 | 4.19 | 0.42 | -4.90 |
| IPI00216697 | Isoform Er1 of Ankyrin-1                      | R.SRDIEVLEGMSLFAELSGNLVPVK.K                   | 2 | 4.47 | 0.48 | -5.20 |
| IPI00216697 | Isoform Er1 of Ankyrin-1                      | R.SRDIEVLEGMSLFAELSGNLVPVK.K                   | 3 | 2.98 | 0.31 | -4.68 |
| IPI00216697 | Isoform Er1 of Ankyrin-1                      | R.SRDIEVLEGMSLFAELSGNLVPVKK.A                  | 3 | 5.76 | 0.48 | -7.02 |
| IPI00216697 | Isoform Er1 of Ankyrin-1                      | R.SRDIEVLEGMSLFAELSGNLVPVKK.A                  | 4 | 4.16 | 0.31 | -3.33 |
| IPI00216697 | Isoform Er1 of Ankyrin-1                      | R.VENPNSLLEQSVALLNLWVIR.E                      | 2 | 4.37 | 0.48 | -4.65 |
| IPI00216697 | Isoform Er1 of Ankyrin-1                      | R.VENPNSLLEQSVALLNLWVIR.E                      | 3 | 3.44 | 0.24 | -5.84 |
| IPI00216699 | Isoform 2 of Unc-112-related protein 2        | R.GEELDEDLFLQLTGGHEAF.-                        | 2 | 2.75 | 0.25 | -2.99 |
| IPI00216699 | Isoform 2 of Unc-112-related protein 2        | R.ILEAHQNVAQLSLAEALR.F                         | 3 | 4.22 | 0.35 | -4.02 |
| IPI00216704 | Isoform 2 of Spectrin beta chain, erythrocyte | F.VAELASHEGWLENIDAEGK.Q                        | 3 | 3.63 | 0.21 | -5.56 |
| IPI00216704 | Isoform 2 of Spectrin beta chain, erythrocyte | K.DGLNEMWADLLELIDTR.M                          | 2 | 5.41 | 0.46 | -3.72 |
| IPI00216704 | Isoform 2 of Spectrin beta chain, erythrocyte | K.DGLNEMWADLLELIDTR.M                          | 3 | 3.99 | 0.22 | -2.40 |
| IPI00216704 | Isoform 2 of Spectrin beta chain, erythrocyte | K.EQEVSAAWQALLDACAGR.R                         | 2 | 6.06 | 0.61 | -5.97 |
| IPI00216704 | Isoform 2 of Spectrin beta chain, erythrocyte | K.EQEVSAAWQALLDACAGR.R                         | 3 | 3.46 | 0.36 | -3.61 |
| IPI00216704 | Isoform 2 of Spectrin beta chain, erythrocyte | K.FFWEMDEAESWIK.E                              | 2 | 4.23 | 0.35 | -5.55 |
| IPI00216704 | Isoform 2 of Spectrin beta chain, erythrocyte | K.GNLEVLLFTIQSR.M                              | 2 | 3.04 | 0.26 | -3.75 |
| IPI00216704 | Isoform 2 of Spectrin beta chain, erythrocyte | K.GNLEVLLFTIQSR.M                              | 3 | 2.73 | 0.27 | -2.14 |
| IPI00216704 | Isoform 2 of Spectrin beta chain, erythrocyte | K.HQAFVAELASHEGWLENIDAEGK.Q                    | 2 | 5.79 | 0.59 | -3.51 |
| IPI00216704 | Isoform 2 of Spectrin beta chain, erythrocyte | K.HQAFVAELASHEGWLENIDAEGK.Q                    | 3 | 6.29 | 0.58 | -3.16 |
| IPI00216704 | Isoform 2 of Spectrin beta chain, erythrocyte | K.HQAFVAELASHEGWLENIDAEGK.Q                    | 4 | 2.99 | 0.23 | -3.06 |
| IPI00216704 | Isoform 2 of Spectrin beta chain, erythrocyte | K.NFSACLELGESLLQR.Q                            | 2 | 5.07 | 0.48 | -7.21 |
| IPI00216704 | Isoform 2 of Spectrin beta chain, erythrocyte | K.NFSACLELGESLLQR.Q                            | 3 | 2.67 | 0.18 | -5.33 |
| IPI00216704 | Isoform 2 of Spectrin beta chain, erythrocyte | Q.SLQGGEDLLGEVSQLQAFQLDLDFFQAWLSITQK.A         | 3 | 7.17 | 0.63 | -2.22 |
| IPI00216704 | Isoform 2 of Spectrin beta chain, erythrocyte | R.DANEAQQYYLDADEAEAWIGEQLYVISDEIPKDEEGAIVMLK.R | 3 | 3.88 | 0.55 | -3.48 |
| IPI00216704 | Isoform 2 of Spectrin beta chain, erythrocyte | R.DANEAQQYYLDADEAEAWIGEQLYVISDEIPKDEEGAIVMLK.R | 4 | 5.29 | 0.52 | -4.03 |
| IPI00216704 | Isoform 2 of Spectrin beta chain, erythrocyte | R.DASVAEAWLIAQEPYLASGDFGHTVDSVEK.L             | 3 | 4.63 | 0.41 | -5.30 |
| IPI00216704 | Isoform 2 of Spectrin beta chain, erythrocyte | R.DLLSWMESIIR.Q                                | 2 | 3.79 | 0.32 | -4.22 |
| IPI00216704 | Isoform 2 of Spectrin beta chain, erythrocyte | R.DNLELQNFLQNCQELTLWINDK.L                     | 2 | 5.05 | 0.54 | -4.37 |
| IPI00216704 | Isoform 2 of Spectrin beta chain, erythrocyte | R.DNLELQNFLQNCQELTLWINDK.L                     | 3 | 6.52 | 0.51 | -5.54 |
| IPI00216704 | Isoform 2 of Spectrin beta chain, erythrocyte | R.ELHLLGVQVQQFQDVATR.L                         | 3 | 4.97 | 0.38 | -3.45 |
| IPI00216704 | Isoform 2 of Spectrin beta chain, erythrocyte | R.ELYQQVVAQADLR.Q                              | 2 | 3.98 | 0.23 | -2.66 |
| IPI00216704 | Isoform 2 of Spectrin beta chain, erythrocyte | R.GQQLVEAAEIDCQDLEER.L                         | 2 | 6.01 | 0.61 | -3.65 |

|             |                                               |                                 |   |      |      |       |
|-------------|-----------------------------------------------|---------------------------------|---|------|------|-------|
| IPI00216704 | Isoform 2 of Spectrin beta chain, erythrocyte | R.KEELGELFAQVPSMGEEGGDADLSIEK.R | 3 | 5.55 | 0.47 | -1.22 |
| IPI00216704 | Isoform 2 of Spectrin beta chain, erythrocyte | R.LIDAGHSEAAITAEWK.D            | 3 | 2.93 | 0.20 | -2.76 |
| IPI00216704 | Isoform 2 of Spectrin beta chain, erythrocyte | R.LQEALDLYTVFGETDACELWM*GEK.E   | 2 | 4.54 | 0.58 | -4.99 |
| IPI00216704 | Isoform 2 of Spectrin beta chain, erythrocyte | R.LQEALDLYTVFGETDACELWM*GEK.E   | 3 | 3.15 | 0.33 | -3.95 |
| IPI00216704 | Isoform 2 of Spectrin beta chain, erythrocyte | R.LQEALDLYTVFGETDACELWMGEK.E    | 2 | 5.20 | 0.64 | -4.82 |
| IPI00216704 | Isoform 2 of Spectrin beta chain, erythrocyte | R.LQEALDLYTVFGETDACELWMGEK.E    | 3 | 5.56 | 0.57 | -6.14 |
| IPI00216704 | Isoform 2 of Spectrin beta chain, erythrocyte | R.LVAQDNFGYDLAAVEAAK.K          | 2 | 5.35 | 0.49 | -4.38 |
| IPI00216704 | Isoform 2 of Spectrin beta chain, erythrocyte | R.YFYTGAEILGLIDEK.H             | 2 | 5.13 | 0.46 | -5.05 |
| IPI00216704 | Isoform 2 of Spectrin beta chain, erythrocyte | R.YFYTGAEILGLIDEK.H             | 3 | 2.92 | 0.19 | -3.76 |
| IPI00216728 | Neurexin 3-alpha                              | A.PGLGDFLQLHIEQGK.I             | 2 | 3.08 | 0.35 | -4.17 |
| IPI00216728 | Neurexin 3-alpha                              | G.LEFM*GLPNQWAR.Y               | 2 | 4.31 | 0.34 | -3.18 |
| IPI00216728 | Neurexin 3-alpha                              | K.AREENVATFR.G                  | 2 | 3.72 | 0.23 | -2.99 |
| IPI00216728 | Neurexin 3-alpha                              | K.CENVATLDPINFETPEAYISLPK.W     | 2 | 5.59 | 0.47 | -5.72 |
| IPI00216728 | Neurexin 3-alpha                              | K.DGAVSLVINLGSFAFEAIVEPVNGK.F   | 3 | 3.16 | 0.21 | -6.08 |
| IPI00216728 | Neurexin 3-alpha                              | K.EVVYKNNDIR.L                  | 2 | 2.17 | 0.11 | -0.62 |
| IPI00216728 | Neurexin 3-alpha                              | K.EVVYKNNDIR.L                  | 3 | 2.10 | 0.14 | -2.04 |
| IPI00216728 | Neurexin 3-alpha                              | K.GDLYM*AGLAQGM*YSNLPK.L        | 2 | 5.40 | 0.57 | -3.13 |
| IPI00216728 | Neurexin 3-alpha                              | K.GDLYM*AGLAQGM*YSNLPK.L        | 3 | 3.88 | 0.45 | -2.41 |
| IPI00216728 | Neurexin 3-alpha                              | K.GPETLYAGQK.L                  | 1 | 2.11 | 0.26 | -1.68 |
| IPI00216728 | Neurexin 3-alpha                              | K.GPETLYAGQK.L                  | 2 | 2.94 | 0.21 | 0.06  |
| IPI00216728 | Neurexin 3-alpha                              | K.GRLFQQQLSGLYYDGLK.V           | 3 | 4.55 | 0.43 | -3.36 |
| IPI00216728 | Neurexin 3-alpha                              | K.GYIHVYFDLGNPNVIK.G            | 2 | 4.55 | 0.44 | -1.43 |
| IPI00216728 | Neurexin 3-alpha                              | K.GYIHVYFDLGNPNVIK.G            | 3 | 3.88 | 0.22 | -3.69 |
| IPI00216728 | Neurexin 3-alpha                              | K.IIM*PM*VM*HTEAEDVSFR.F        | 2 | 4.07 | 0.50 | -3.30 |
| IPI00216728 | Neurexin 3-alpha                              | K.IIM*PM*VM*HTEAEDVSFR.F        | 3 | 2.09 | 0.32 | -2.29 |
| IPI00216728 | Neurexin 3-alpha                              | K.IYGEVVK.C                     | 1 | 2.06 | 0.22 | -2.31 |
| IPI00216728 | Neurexin 3-alpha                              | K.IYGEVVK.C                     | 2 | 1.55 | 0.06 | -1.54 |
| IPI00216728 | Neurexin 3-alpha                              | K.LM*VNLGKGPETLYAGQK.L          | 3 | 3.03 | 0.26 | -1.32 |
| IPI00216728 | Neurexin 3-alpha                              | K.NLDLKGDLYM*AGLAQGM*YSNLPK.L   | 2 | 4.64 | 0.51 | -3.72 |
| IPI00216728 | Neurexin 3-alpha                              | K.NLDLKGDLYM*AGLAQGM*YSNLPK.L   | 3 | 5.76 | 0.43 | -3.66 |
| IPI00216728 | Neurexin 3-alpha                              | K.SADYVNLALK.D                  | 1 | 2.35 | 0.24 | -3.84 |
| IPI00216728 | Neurexin 3-alpha                              | K.SADYVNLALK.D                  | 2 | 3.96 | 0.37 | -1.89 |
| IPI00216728 | Neurexin 3-alpha                              | K.SGGLILYTPANDRPSTR.S           | 2 | 2.76 | 0.21 | -3.81 |
| IPI00216728 | Neurexin 3-alpha                              | K.SGGLILYTPANDRPSTR.S           | 3 | 2.88 | 0.35 | -3.79 |
| IPI00216728 | Neurexin 3-alpha                              | K.TTSPDGFILFNSGDGNDFIARELVK.G   | 2 | 4.16 | 0.50 | -4.19 |
| IPI00216728 | Neurexin 3-alpha                              | K.TTSPDGFILFNSGDGNDFIARELVK.G   | 3 | 3.53 | 0.34 | -4.27 |
| IPI00216728 | Neurexin 3-alpha                              | K.VLNM*AAENNPNIK.I              | 2 | 4.53 | 0.36 | -2.56 |
| IPI00216728 | Neurexin 3-alpha                              | K.VLNM*AAENNPNIK.I              | 3 | 3.80 | 0.23 | -0.76 |
| IPI00216728 | Neurexin 3-alpha                              | K.VVTQVINGAK.N                  | 1 | 2.30 | 0.15 | -1.44 |
| IPI00216728 | Neurexin 3-alpha                              | K.VVTQVINGAK.N                  | 2 | 2.99 | 0.14 | -2.87 |
| IPI00216728 | Neurexin 3-alpha                              | K.YGNSEPR.L                     | 2 | 1.92 | 0.25 | -1.41 |
| IPI00216728 | Neurexin 3-alpha                              | R.AYGLLVATTSR.D                 | 1 | 2.21 | 0.33 | -3.49 |

|             |                  |                                              |   |      |      |       |
|-------------|------------------|----------------------------------------------|---|------|------|-------|
| IPI00216728 | Neurexin 3-alpha | R.AYGLLVATTSR.D                              | 2 | 4.29 | 0.40 | -3.80 |
| IPI00216728 | Neurexin 3-alpha | R.DGFQGGCLASVDLNGR.L                         | 2 | 4.89 | 0.57 | -5.11 |
| IPI00216728 | Neurexin 3-alpha | R.DGFQGGCLASVDLNGRLPDLINDALHR.S              | 3 | 5.12 | 0.47 | -2.78 |
| IPI00216728 | Neurexin 3-alpha | R.DLFIDGR.S                                  | 1 | 2.11 | 0.13 | -1.89 |
| IPI00216728 | Neurexin 3-alpha | R.DNSNTHSLKVDTK.V                            | 2 | 3.62 | 0.42 | -3.87 |
| IPI00216728 | Neurexin 3-alpha | R.DSADTLRLELDGGR.V                           | 3 | 2.60 | 0.27 | -2.05 |
| IPI00216728 | Neurexin 3-alpha | R.DSADTLRLELDGGRVK.L                         | 3 | 4.11 | 0.27 | -1.81 |
| IPI00216728 | Neurexin 3-alpha | R.EASILSYDGS*YM*K.I                          | 2 | 4.21 | 0.13 | -1.99 |
| IPI00216728 | Neurexin 3-alpha | R.EENVATFR.G                                 | 1 | 2.23 | 0.18 | -3.61 |
| IPI00216728 | Neurexin 3-alpha | R.EENVATFR.G                                 | 2 | 2.00 | 0.23 | -3.05 |
| IPI00216728 | Neurexin 3-alpha | R.FSM*DCAETAVLSNK.Q                          | 2 | 4.81 | 0.52 | -4.57 |
| IPI00216728 | Neurexin 3-alpha | R.FSM*DCAETAVLSNK.Q                          | 3 | 2.84 | 0.28 | -3.73 |
| IPI00216728 | Neurexin 3-alpha | R.GSEYLCYDLSQNPISQSSSDEITLSFK.T              | 2 | 4.47 | 0.54 | -4.80 |
| IPI00216728 | Neurexin 3-alpha | R.GVQM*DAEGPCGERPCENGGICFLLDGHPTCDCSTTGYGK.L | 4 | 4.67 | 0.45 | -2.22 |
| IPI00216728 | Neurexin 3-alpha | R.IDSAPGLGDFLQLHIEQGK.I                      | 2 | 5.03 | 0.43 | -2.90 |
| IPI00216728 | Neurexin 3-alpha | R.IDSAPGLGDFLQLHIEQGK.I                      | 3 | 2.74 | 0.34 | -3.15 |
| IPI00216728 | Neurexin 3-alpha | R.LAVGFSTTVK.D                               | 2 | 2.73 | 0.28 | -1.95 |
| IPI00216728 | Neurexin 3-alpha | R.LAVGFSTTVKDGILVR.I                         | 3 | 2.19 | 0.19 | -2.27 |
| IPI00216728 | Neurexin 3-alpha | R.LEFHNIETGIM*TEK.R                          | 2 | 4.01 | 0.36 | -2.47 |
| IPI00216728 | Neurexin 3-alpha | R.LEFHNIETGIM*TEK.R                          | 3 | 3.67 | 0.33 | -3.05 |
| IPI00216728 | Neurexin 3-alpha | R.LEFHNIETGIM*TEKR.Y                         | 2 | 3.67 | 0.38 | -3.02 |
| IPI00216728 | Neurexin 3-alpha | R.LEFHNIETGIM*TEKR.Y                         | 3 | 3.74 | 0.43 | -2.30 |
| IPI00216728 | Neurexin 3-alpha | R.LFQQQLSGLYYDGLK.V                          | 2 | 5.21 | 0.39 | -6.20 |
| IPI00216728 | Neurexin 3-alpha | R.LFQQQLSGLYYDGLK.V                          | 3 | 4.24 | 0.36 | -3.34 |
| IPI00216728 | Neurexin 3-alpha | R.LPDLINDALHR.S                              | 2 | 3.78 | 0.36 | -2.41 |
| IPI00216728 | Neurexin 3-alpha | R.LPDLINDALHR.S                              | 3 | 4.14 | 0.33 | -2.11 |
| IPI00216728 | Neurexin 3-alpha | R.M*GSISFDFR.T                               | 1 | 1.31 | 0.22 | -3.10 |
| IPI00216728 | Neurexin 3-alpha | R.M*GSISFDFR.T                               | 2 | 3.82 | 0.38 | -2.50 |
| IPI00216728 | Neurexin 3-alpha | R.NGLLHTGK.S                                 | 1 | 2.65 | 0.14 | -3.65 |
| IPI00216728 | Neurexin 3-alpha | R.NGLLHTGK.S                                 | 2 | 2.77 | 0.15 | -1.89 |
| IPI00216728 | Neurexin 3-alpha | R.NIIADPVTFK.T                               | 1 | 2.97 | 0.31 | -2.13 |
| IPI00216728 | Neurexin 3-alpha | R.NIIADPVTFK.T                               | 2 | 2.61 | 0.15 | -2.52 |
| IPI00216728 | Neurexin 3-alpha | R.QLAEM*QNAAGVK.S                            | 1 | 1.24 | 0.11 | -2.06 |
| IPI00216728 | Neurexin 3-alpha | R.QLAEM*QNAAGVK.S                            | 2 | 2.93 | 0.37 | -3.09 |
| IPI00216728 | Neurexin 3-alpha | R.QLTIFNTQAQIAIGGK.D                         | 2 | 4.62 | 0.44 | -6.95 |
| IPI00216728 | Neurexin 3-alpha | R.QLTIFNTQAQIAIGGKDK.G                       | 3 | 2.53 | 0.33 | -4.21 |
| IPI00216728 | Neurexin 3-alpha | R.RTPFTASGESEILDLEGDM*YLGGLPENR.A            | 3 | 3.70 | 0.29 | -1.88 |
| IPI00216728 | Neurexin 3-alpha | R.SDLSFQFK.T                                 | 1 | 2.63 | 0.17 | -2.25 |
| IPI00216728 | Neurexin 3-alpha | R.SDLSFQFK.T                                 | 2 | 2.55 | 0.09 | -2.93 |
| IPI00216728 | Neurexin 3-alpha | R.SGTISVNSR.R                                | 1 | 2.12 | 0.18 | -1.75 |
| IPI00216728 | Neurexin 3-alpha | R.SGTISVNSR.R                                | 2 | 2.13 | 0.07 | -0.95 |
| IPI00216728 | Neurexin 3-alpha | R.SKAREENVATFR.G                             | 3 | 2.06 | 0.13 | -2.77 |

|             |                                                                |                                         |   |      |      |       |
|-------------|----------------------------------------------------------------|-----------------------------------------|---|------|------|-------|
| IPI00216728 | Neurexin 3-alpha                                               | R.TPFTASGESEILDLEGDM*YLGGLPENR.A        | 2 | 4.48 | 0.55 | -4.54 |
| IPI00216728 | Neurexin 3-alpha                                               | R.TPFTASGESEILDLEGDM*YLGGLPENR.A        | 3 | 4.09 | 0.37 | -4.17 |
| IPI00216728 | Neurexin 3-alpha                                               | R.TPVNDGKYHVVR.F                        | 2 | 3.84 | 0.11 | -4.34 |
| IPI00216728 | Neurexin 3-alpha                                               | R.TTEPNGLILFTHGKPQER.K                  | 2 | 3.21 | 0.37 | -3.92 |
| IPI00216728 | Neurexin 3-alpha                                               | R.TTEPNGLILFTHGKPQER.K                  | 3 | 2.43 | 0.09 | -0.33 |
| IPI00216728 | Neurexin 3-alpha                                               | R.TTEPNGLILFTHGKPQER.K                  | 4 | 3.21 | 0.32 | -0.66 |
| IPI00216728 | Neurexin 3-alpha                                               | W.PVNEHYPTGNTDNER.F                     | 3 | 3.78 | 0.46 | -1.79 |
| IPI00216774 | Cerebellin-2                                                   | R.EAASNGVLLLM*ER.E                      | 2 | 4.00 | 0.29 | -1.19 |
| IPI00216780 | Cartilage intermediate layer protein 2 precursor               | R.EM*SEAAQAQAR.A                        | 2 | 2.76 | 0.19 | -3.36 |
| IPI00216882 | mannan-binding lectin serine protease 1 isoform 3              | K.APEPISTQSHSVLILFHSDNSGENR.G           | 4 | 3.04 | 0.14 | -1.53 |
| IPI00216882 | mannan-binding lectin serine protease 1 isoform 3              | K.DNVEM*DTFQIECLK.D                     | 2 | 3.06 | 0.22 |       |
| IPI00216882 | mannan-binding lectin serine protease 1 isoform 3              | K.DQVLVSCDTGYK.V                        | 2 | 3.81 | 0.34 | -3.52 |
| IPI00216882 | mannan-binding lectin serine protease 1 isoform 3              | K.SDFSNEER.F                            | 2 | 2.18 | 0.17 | -2.43 |
| IPI00216882 | mannan-binding lectin serine protease 1 isoform 3              | R.AAGNECPQLQPPVHGK.I                    | 2 | 2.11 | 0.25 |       |
| IPI00216882 | mannan-binding lectin serine protease 1 isoform 3              | R.ETTDTEQTPGQEVVLSPGSFM*SITFR.S         | 3 | 4.46 | 0.32 | -5.59 |
| IPI00216882 | mannan-binding lectin serine protease 1 isoform 3              | R.TGVITSPDFPNPYPK.S                     | 2 | 3.60 | 0.27 |       |
| IPI00216914 | Vitelline membrane outer layer protein 1 homolog precursor     | R.GLGDDTALNDAR.L                        | 2 | 3.87 | 0.35 | -2.52 |
| IPI00216921 | Isoform 2 of Stathmin-4                                        | R.ERRAQADTVDLNWCVISDMEVIELNK.C          | 3 | 2.50 | 0.08 | -3.16 |
| IPI00216963 | Isoform 9 of CASP8 and FADD-like apoptosis regulator precursor | R.GPAGGQQPLGGGWASDEECGIQGGSEARAVHSSPR.S | 3 | 1.44 | 0.21 | 1.08  |
| IPI00216983 | Carbonic anhydrase 3                                           | K.EPM*TVSSDQM*AK.L                      | 2 | 2.30 | 0.40 | -3.65 |
| IPI00216983 | Carbonic anhydrase 3                                           | K.GENQSPVELHTK.D                        | 2 | 2.89 | 0.24 | -2.76 |
| IPI00216983 | Carbonic anhydrase 3                                           | K.GKEAPFTK.F                            | 2 | 2.00 | 0.06 | -3.54 |
| IPI00216983 | Carbonic anhydrase 3                                           | K.IGHENGEFQIFLDALDK.I                   | 3 | 4.07 | 0.11 | -2.49 |
| IPI00216983 | Carbonic anhydrase 3                                           | K.IGHENGEFQIFLDALDKIK.T                 | 2 | 5.26 | 0.47 | -5.18 |
| IPI00216983 | Carbonic anhydrase 3                                           | K.IGHENGEFQIFLDALDKIK.T                 | 3 | 5.31 | 0.50 | -3.86 |
| IPI00216983 | Carbonic anhydrase 3                                           | K.IGHENGEFQIFLDALDKIK.T                 | 4 | 5.76 | 0.37 | -4.07 |
| IPI00216983 | Carbonic anhydrase 3                                           | K.YNTFKEALK.Q                           | 2 | 2.19 | 0.19 | 0.87  |
| IPI00216983 | Carbonic anhydrase 3                                           | R.VVFDPTYDR.S                           | 2 | 1.54 | 0.11 | -3.43 |
| IPI00217005 | Ankyrin repeat domain-containing protein 18A                   | K.EAFAGAVKANNSMSKK.L                    | 2 | 3.09 | 0.16 |       |
| IPI00217005 | Ankyrin repeat domain-containing protein 18A                   | R.NDNQETAAMKPANLKKRK.E                  | 2 | 2.09 | 0.11 | -7.93 |
| IPI00217012 | pleckstrin and Sec7 domain containing                          | K.VHADPDCRKTPRGKR.G                     | 3 | 2.11 | 0.14 | -1.22 |
| IPI00217023 | MMAA protein                                                   | R.EQIPLLEQKVLIGA.L                      | 1 | 3.64 | 0.07 |       |
| IPI00217146 | SLIT and NTRK-like protein 4 precursor                         | K.AWLENMPYNIYIGEACETPSDLYGRLLKET.N      | 3 | 3.88 | 0.11 | 3.01  |
| IPI00217146 | SLIT and NTRK-like protein 4 precursor                         | K.LPYIGVLEHIGR.V                        | 3 | 2.60 | 0.15 | -3.16 |
| IPI00217146 | SLIT and NTRK-like protein 4 precursor                         | K.LQNIEGGAFGLSALK.Q                     | 2 | 5.39 | 0.53 | -3.77 |
| IPI00217146 | SLIT and NTRK-like protein 4 precursor                         | K.LSDGIVVK.E                            | 2 | 2.16 | 0.07 | -3.00 |
| IPI00217146 | SLIT and NTRK-like protein 4 precursor                         | K.VLILNDNLISFLPDNIFR.F                  | 2 | 5.70 | 0.47 | -5.12 |
| IPI00217146 | SLIT and NTRK-like protein 4 precursor                         | R.ADTFLGIENLEYLQADYNLIK.Y               | 2 | 4.96 | 0.52 | -4.51 |
| IPI00217146 | SLIT and NTRK-like protein 4 precursor                         | R.ADTFLGIENLEYLQADYNLIK.Y               | 3 | 4.65 | 0.42 | -5.92 |
| IPI00217146 | SLIT and NTRK-like protein 4 precursor                         | R.FASLTHLDIR.G                          | 2 | 2.95 | 0.24 | -3.25 |



|             |                                                                            |                             |   |      |      |       |
|-------------|----------------------------------------------------------------------------|-----------------------------|---|------|------|-------|
| IPI00217146 | SLIT and NTRK-like protein 4 precursor                                     | R.IQKLPYIGVLEHIGR.V         | 3 | 4.24 | 0.31 | -3.61 |
| IPI00217146 | SLIT and NTRK-like protein 4 precursor                                     | R.IQKLPYIGVLEHIGR.V         | 4 | 4.81 | 0.33 | -3.40 |
| IPI00217236 | Tubulin-specific chaperone A                                               | K.M*RAEDGENYDIKK.Q          | 3 | 3.07 | 0.22 | -2.12 |
| IPI00217236 | Tubulin-specific chaperone A                                               | R.ILENEKDLEEAEYKEAR.L       | 4 | 2.23 | 0.12 | -1.96 |
| IPI00217236 | Tubulin-specific chaperone A                                               | R.M*M*IPDCQR.R              | 2 | 2.10 | 0.09 | -2.16 |
| IPI00217236 | Tubulin-specific chaperone A                                               | R.RLEAAYLDLQR.I             | 3 | 3.45 | 0.11 | -4.18 |
| IPI00217258 | CCDC100 protein                                                            | -.MVSKSDQLLIVVSILEGRHFPK.R  | 2 | 1.06 | 0.18 | -6.56 |
| IPI00217264 | Isoform 3 of MAP7 domain-containing protein 3                              | K.EAVGGQAEDHLK.L            | 3 | 1.68 | 0.11 | 1.00  |
| IPI00217345 | Isoform 2 of UDP-GlcNAc:betaGal beta-1,3-N-acetylglucosaminyltransferase 2 | K.SLTPHFAR.R                | 2 | 1.41 | 0.18 | -3.32 |
| IPI00217345 | Isoform 2 of UDP-GlcNAc:betaGal beta-1,3-N-acetylglucosaminyltransferase 2 | R.FKDFLLYLR.C               | 2 | 3.38 | 0.27 | -4.55 |
| IPI00217345 | Isoform 2 of UDP-GlcNAc:betaGal beta-1,3-N-acetylglucosaminyltransferase 2 | R.VFLLGQTTPPEDNHPDLSDM*LK.F | 3 | 2.93 | 0.23 | -3.55 |
| IPI00217345 | Isoform 2 of UDP-GlcNAc:betaGal beta-1,3-N-acetylglucosaminyltransferase 2 | R.VTSVVTGFNNLPDR.F          | 2 | 4.38 | 0.45 | -2.01 |
| IPI00217376 | Isoform 1 of Sodium channel subunit beta-4 precursor                       | K.ILIEGTVKNEK.S             | 2 | 2.77 | 0.25 | -2.86 |
| IPI00217376 | Isoform 1 of Sodium channel subunit beta-4 precursor                       | R.DLEFSDTGK.Y               | 2 | 2.40 | 0.26 | -2.36 |
| IPI00217376 | Isoform 1 of Sodium channel subunit beta-4 precursor                       | R.ITLVGSK.E                 | 2 | 1.75 | 0.08 | -3.07 |
| IPI00217405 | Isoform 1 of E3 ubiquitin-protein ligase UBR1                              | K.ILTCM*QGMEIR.R            | 2 | 2.53 | 0.17 | 2.31  |
| IPI00217435 | Signal peptide, CUB and EGF-like domain-containing protein 1 precursor     | K.YALHSDGR.T                | 2 | 2.32 | 0.29 | -3.08 |
| IPI00217465 | Histone H1.2                                                               | K.KAKKPAAATVTKK.V           | 2 | 2.97 | 0.29 | -2.90 |
| IPI00217465 | Histone H1.2                                                               | R.KASGPPVSELITK.A           | 3 | 3.71 | 0.18 | -3.59 |
| IPI00217465 | Histone H1.2                                                               | R.SGVSLAALK.K               | 2 | 2.29 | 0.08 | -2.33 |
| IPI00217465 | Histone H1.2                                                               | R.SGVSLAALKK.A              | 2 | 3.07 | 0.16 | 0.78  |
| IPI00217466 | Histone H1.3                                                               | K.KVKKPATAAGTKK.V           | 2 | 3.00 | 0.15 | -3.00 |
| IPI00217466 | Histone H1.3                                                               | K.KVKKPATAAGTKK.V           | 3 | 3.40 | 0.22 | -2.84 |
| IPI00217466 | Histone H1.3                                                               | R.KASGPPVSELITK.A           | 3 | 3.71 | 0.18 | -3.59 |
| IPI00217466 | Histone H1.3                                                               | R.SGVSLAALK.K               | 2 | 2.29 | 0.08 | -2.33 |
| IPI00217466 | Histone H1.3                                                               | R.SGVSLAALKK.A              | 2 | 3.07 | 0.16 | 0.78  |
| IPI00217467 | Histone H1.4                                                               | K.AKKPAGAANKPK.K            | 2 | 2.72 | 0.32 | -3.80 |
| IPI00217467 | Histone H1.4                                                               | R.KASGPPVSELITK.A           | 3 | 3.71 | 0.18 | -3.59 |
| IPI00217467 | Histone H1.4                                                               | R.SGVSLAALK.K               | 2 | 2.29 | 0.08 | -2.33 |
| IPI00217467 | Histone H1.4                                                               | R.SGVSLAALKK.A              | 2 | 3.07 | 0.16 | 0.78  |
| IPI00217493 | Myoglobin                                                                  | H.GATVLTALGGILK.K           | 2 | 3.23 | 0.20 | -1.15 |
| IPI00217493 | Myoglobin                                                                  | K.DM*ASNYKELGFQG.-          | 2 | 3.77 | 0.44 | -3.76 |
| IPI00217493 | Myoglobin                                                                  | K.GHPETLEKFDK.F             | 2 | 2.83 | 0.29 | -3.30 |
| IPI00217493 | Myoglobin                                                                  | K.HGATVLTALGGILK.K          | 2 | 4.44 | 0.50 | -1.68 |

|             |                                                                        |                                   |   |      |      |       |
|-------------|------------------------------------------------------------------------|-----------------------------------|---|------|------|-------|
| IPI00217493 | Myoglobin                                                              | K.HGATVLTALGGILK.K                | 3 | 3.08 | 0.14 | -0.87 |
| IPI00217493 | Myoglobin                                                              | K.HPGDFGADAQGAM*NK.A              | 2 | 2.84 | 0.26 | -3.03 |
| IPI00217493 | Myoglobin                                                              | K.HPGDFGADAQGAM*NK.A              | 3 | 4.04 | 0.26 | -1.32 |
| IPI00217493 | Myoglobin                                                              | K.SEDEM*KASEDLKK.H                | 3 | 2.68 | 0.12 | -1.86 |
| IPI00217493 | Myoglobin                                                              | K.VEADIPGHGQEVLR.L                | 2 | 2.53 | 0.21 | -2.78 |
| IPI00217493 | Myoglobin                                                              | K.VEADIPGHGQEVLR.L                | 3 | 3.49 | 0.40 | -1.31 |
| IPI00217493 | Myoglobin                                                              | P.GDFGADAQGAM*NK.A                | 2 | 3.62 | 0.42 | -4.55 |
| IPI00217537 | Isoform 1 of Putative Polycomb group protein ASXL1                     | K.KKTGVM*LPRVVLPLK.V              | 2 | 2.64 | 0.11 |       |
| IPI00217617 | palmitoylated membrane protein 7                                       | K.IIRLVKNREPLGATIKK.D             | 2 | 1.49 | 0.17 | -8.73 |
| IPI00217652 | Isoform 1 of Glycosyltransferase 8 domain-containing protein 3         | R.SLLKPLELELQK.T                  | 3 | 3.09 | 0.09 | -1.97 |
| IPI00217740 | C20orf12 protein                                                       | K.SDTPDVNIYYTLDGSKPEFLK.R         | 2 | 1.16 | 0.18 | 2.21  |
| IPI00217759 | Isoform 1 of Alpha-(1,3)-fucosyltransferase 11                         | K.QPGGITNQFLDSLK.H                | 2 | 3.05 | 0.39 | -3.88 |
| IPI00217759 | Isoform 1 of Alpha-(1,3)-fucosyltransferase 11                         | R.ALLFYGTDFR.A                    | 2 | 3.20 | 0.29 | -3.57 |
| IPI00217759 | Isoform 1 of Alpha-(1,3)-fucosyltransferase 11                         | R.EEAGDLPVLLWWSPGLFPHFPGDSER.I    | 3 | 2.83 | 0.38 | -3.37 |
| IPI00217759 | Isoform 1 of Alpha-(1,3)-fucosyltransferase 11                         | R.LQDTATATTEDPELLAFLSR.Y          | 2 | 6.58 | 0.62 | -4.31 |
| IPI00217759 | Isoform 1 of Alpha-(1,3)-fucosyltransferase 11                         | R.LQDTATATTEDPELLAFLSR.Y          | 3 | 5.38 | 0.26 | -3.40 |
| IPI00217781 | Similar to expressed sequence AI593442                                 | R.TFASPNASGSGNTGAR.G              | 2 | 4.28 | 0.39 | -2.26 |
| IPI00217791 | Coiled-coil domain-containing protein 105                              | K.TLASCRTLNFCFKERLQAVDLM*NQPLDK.V | 3 | 2.48 | 0.09 | 1.07  |
| IPI00217831 | Ankyrin repeat domain-containing protein 13A                           | R.TDKAEVNGYEAKVYTVNNVNVTIKR.T     | 3 | 2.93 | 0.10 | -8.33 |
| IPI00217831 | Ankyrin repeat domain-containing protein 13A                           | R.TDKAEVNGYEAKVYTVNNVNVTIKR.T     | 4 | 3.08 | 0.25 | -8.45 |
| IPI00217871 | Delta-1-pyrroline-5-carboxylate dehydrogenase, mitochondrial precursor | K.TVIQAEIDAAAELIDFFR.F            | 3 | 3.04 | 0.32 | -2.78 |
| IPI00217882 | Sortilin precursor                                                     | K.ADLGALELWR.T                    | 2 | 2.44 | 0.13 | -2.07 |
| IPI00217882 | Sortilin precursor                                                     | K.VVLTAEVSGGSR.G                  | 2 | 3.06 | 0.36 |       |
| IPI00217882 | Sortilin precursor                                                     | R.LDAPPPPAAPLPR.W                 | 2 | 2.37 | 0.32 | -3.56 |
| IPI00217882 | Sortilin precursor                                                     | R.TEFGM*AIGPENSGK.V               | 2 | 4.15 | 0.46 | -3.68 |
| IPI00217948 | FRMD4B protein                                                         | R.SLDEIAM*DLTETGTQRASKLVLETQSQ.F  | 3 | 3.55 | 0.24 | -3.55 |
| IPI00217963 | Keratin, type I cytoskeletal 16                                        | R.LAADDFR.L                       | 2 | 2.47 | 0.23 | -3.76 |
| IPI00217963 | Keratin, type I cytoskeletal 16                                        | R.LASYLDKVR.A                     | 2 | 2.65 | 0.13 | -3.49 |
| IPI00217966 | Isoform 1 of L-lactate dehydrogenase A chain                           | K.DLADELALVDVIEDK.L               | 2 | 4.75 | 0.48 | -3.51 |
| IPI00217966 | Isoform 1 of L-lactate dehydrogenase A chain                           | K.DQLIYNLLKEEQTPQNK.I             | 2 | 4.91 | 0.27 | -2.73 |
| IPI00217966 | Isoform 1 of L-lactate dehydrogenase A chain                           | K.DQLIYNLLKEEQTPQNK.I             | 3 | 4.59 | 0.24 | -2.30 |
| IPI00217966 | Isoform 1 of L-lactate dehydrogenase A chain                           | K.DYNVTANSK.L                     | 2 | 2.82 | 0.33 | -3.30 |
| IPI00217966 | Isoform 1 of L-lactate dehydrogenase A chain                           | K.FIIPNVVK.Y                      | 2 | 2.46 | 0.09 | -1.44 |
| IPI00217966 | Isoform 1 of L-lactate dehydrogenase A chain                           | K.GLYGIKDDVFLSVPCILGQNGISDLVK.V   | 3 | 3.30 | 0.33 | -3.40 |
| IPI00217966 | Isoform 1 of L-lactate dehydrogenase A chain                           | K.GYTSWAIGLSVADLAESIMK.N          | 2 | 3.13 | 0.43 | -2.46 |
| IPI00217966 | Isoform 1 of L-lactate dehydrogenase A chain                           | K.IVSGKDYNVTANSK.L                | 2 | 4.18 | 0.44 | -2.99 |
| IPI00217966 | Isoform 1 of L-lactate dehydrogenase A chain                           | K.IVSGKDYNVTANSK.L                | 3 | 2.89 | 0.33 | -1.83 |
| IPI00217966 | Isoform 1 of L-lactate dehydrogenase A chain                           | K.VTLTSEEEAR.L                    | 2 | 3.49 | 0.25 | -3.36 |
| IPI00217966 | Isoform 1 of L-lactate dehydrogenase A chain                           | N.LVIITAGAR.Q                     | 2 | 3.11 | 0.22 | -1.00 |

|             |                                                                             |                                 |   |      |      |       |
|-------------|-----------------------------------------------------------------------------|---------------------------------|---|------|------|-------|
| IPI00217966 | Isoform 1 of L-lactate dehydrogenase A chain                                | R.NVNIFKFIIPNVVK.Y              | 3 | 3.16 | 0.23 | -2.65 |
| IPI00217966 | Isoform 1 of L-lactate dehydrogenase A chain                                | R.VIGSGCNLDSAR.F                | 1 | 2.49 | 0.27 | -2.12 |
| IPI00217966 | Isoform 1 of L-lactate dehydrogenase A chain                                | R.VIGSGCNLDSAR.F                | 2 | 3.57 | 0.37 | -2.86 |
| IPI00217989 | Isoform 1 of Protein-associating with the carboxyl-terminal domain of ezrin | K.LGGM*ETVCKVSQATPEFLR.S        | 2 | 2.17 | 0.07 | -7.56 |
| IPI00218046 | Heparan-sulfate 6-O-sulfotransferase 3                                      | K.NM*AFFGLTEFQR.K               | 2 | 3.17 | 0.34 | -6.41 |
| IPI00218046 | Heparan-sulfate 6-O-sulfotransferase 3                                      | K.TGGTTFGR.H                    | 1 | 1.24 | 0.17 | -0.11 |
| IPI00218046 | Heparan-sulfate 6-O-sulfotransferase 3                                      | K.TQFLFER.T                     | 2 | 1.77 | 0.08 | -1.10 |
| IPI00218046 | Heparan-sulfate 6-O-sulfotransferase 3                                      | R.AGEAGPPAVPGPAR.R              | 2 | 3.17 | 0.30 | -3.71 |
| IPI00218046 | Heparan-sulfate 6-O-sulfotransferase 3                                      | R.AGEAGPPAVPGPARR.A             | 3 | 2.45 | 0.23 | -2.76 |
| IPI00218046 | Heparan-sulfate 6-O-sulfotransferase 3                                      | R.ASNVEINEGAR.Q                 | 2 | 4.11 | 0.37 | -1.52 |
| IPI00218046 | Heparan-sulfate 6-O-sulfotransferase 3                                      | R.EFM*DCTYNLANNR.Q              | 2 | 1.94 | 0.17 | -3.21 |
| IPI00218046 | Heparan-sulfate 6-O-sulfotransferase 3                                      | R.ETWLFGR.F                     | 1 | 1.99 | 0.19 | -2.50 |
| IPI00218046 | Heparan-sulfate 6-O-sulfotransferase 3                                      | R.FSTGWSCGLHADWTELTNCVPAIM*EK.K | 3 | 2.99 | 0.33 | -4.92 |
| IPI00218046 | Heparan-sulfate 6-O-sulfotransferase 3                                      | R.GAAAPEEEEDEEPGDPR.E           | 2 | 3.20 | 0.41 | -4.02 |
| IPI00218046 | Heparan-sulfate 6-O-sulfotransferase 3                                      | R.IEDLNFLDM*QLYEYAK.D           | 2 | 5.12 | 0.50 | -4.73 |
| IPI00218046 | Heparan-sulfate 6-O-sulfotransferase 3                                      | R.KTQFLFER.T                    | 2 | 2.83 | 0.21 | -2.44 |
| IPI00218046 | Heparan-sulfate 6-O-sulfotransferase 3                                      | R.NFYIYTM*LR.D                  | 2 | 2.91 | 0.24 | -0.96 |
| IPI00218046 | Heparan-sulfate 6-O-sulfotransferase 3                                      | R.QRIEDLNFLDM*QLYEYAK.D         | 2 | 3.54 | 0.38 | -2.42 |
| IPI00218046 | Heparan-sulfate 6-O-sulfotransferase 3                                      | R.QRIEDLNFLDM*QLYEYAK.D         | 3 | 3.79 | 0.29 | -1.54 |
| IPI00218075 | Protein FAM9B                                                               | K.MDKTCSKTK.N                   | 1 | 2.22 | 0.06 | -3.66 |
| IPI00218130 | Glycogen phosphorylase, muscle form                                         | R.LKQEYFVVAATLQDIIR.R           | 3 | 3.33 | 0.27 | -2.88 |
| IPI00218131 | Protein S100-A12                                                            | M.TKLEEHLEGIVNIFHQYSVR.K        | 3 | 5.34 | 0.39 | -3.15 |
| IPI00218192 | Isoform 2 of Inter-alpha-trypsin inhibitor heavy chain H4 precursor         | A.EKNGIDIYSLTVDSR.V             | 2 | 4.52 | 0.51 | -2.76 |
| IPI00218192 | Isoform 2 of Inter-alpha-trypsin inhibitor heavy chain H4 precursor         | K.AEAQAQYSAAVAK.G               | 1 | 3.20 | 0.31 | -3.17 |
| IPI00218192 | Isoform 2 of Inter-alpha-trypsin inhibitor heavy chain H4 precursor         | K.AEAQAQYSAAVAK.G               | 2 | 4.88 | 0.46 | -5.13 |
| IPI00218192 | Isoform 2 of Inter-alpha-trypsin inhibitor heavy chain H4 precursor         | K.AGFSWIEVTFK.N                 | 2 | 3.83 | 0.37 | -3.40 |
| IPI00218192 | Isoform 2 of Inter-alpha-trypsin inhibitor heavy chain H4 precursor         | K.EKAEQAQYSAAVAK.G              | 2 | 4.70 | 0.52 | -3.59 |
| IPI00218192 | Isoform 2 of Inter-alpha-trypsin inhibitor heavy chain H4 precursor         | K.EKAEQAQYSAAVAK.G              | 3 | 2.95 | 0.20 | -1.30 |
| IPI00218192 | Isoform 2 of Inter-alpha-trypsin inhibitor heavy chain H4 precursor         | K.ETLFSVM*PGLK.M                | 2 | 3.05 | 0.37 | -2.95 |
| IPI00218192 | Isoform 2 of Inter-alpha-trypsin inhibitor heavy chain H4 precursor         | K.GSEM*VVAGK.L                  | 1 | 2.36 | 0.16 | -2.42 |
| IPI00218192 | Isoform 2 of Inter-alpha-trypsin inhibitor heavy chain H4 precursor         | K.GSEM*VVAGK.L                  | 2 | 3.20 | 0.25 | -3.04 |

|             |                                                                     |                                        |   |      |      |       |
|-------------|---------------------------------------------------------------------|----------------------------------------|---|------|------|-------|
| IPI00218192 | Isoform 2 of Inter-alpha-trypsin inhibitor heavy chain H4 precursor | K.ILDDLSPRDQFNLIWFSTEQWRPSLVPASAENVK.A | 4 | 3.61 | 0.24 | -3.03 |
| IPI00218192 | Isoform 2 of Inter-alpha-trypsin inhibitor heavy chain H4 precursor | K.ITFELVYEELLK.R                       | 2 | 4.90 | 0.43 | -6.82 |
| IPI00218192 | Isoform 2 of Inter-alpha-trypsin inhibitor heavy chain H4 precursor | K.ITFELVYEELLKR.R                      | 2 | 3.24 | 0.31 | -3.11 |
| IPI00218192 | Isoform 2 of Inter-alpha-trypsin inhibitor heavy chain H4 precursor | K.ITFELVYEELLKR.R                      | 3 | 2.51 | 0.18 | -4.10 |
| IPI00218192 | Isoform 2 of Inter-alpha-trypsin inhibitor heavy chain H4 precursor | K.LALDNGGLAR.R                         | 1 | 2.35 | 0.24 | -3.22 |
| IPI00218192 | Isoform 2 of Inter-alpha-trypsin inhibitor heavy chain H4 precursor | K.LALDNGGLAR.R                         | 2 | 3.38 | 0.30 | -2.67 |
| IPI00218192 | Isoform 2 of Inter-alpha-trypsin inhibitor heavy chain H4 precursor | K.LQDRGPDVLTATVSGK.L                   | 2 | 4.29 | 0.52 | -2.31 |
| IPI00218192 | Isoform 2 of Inter-alpha-trypsin inhibitor heavy chain H4 precursor | K.LQDRGPDVLTATVSGK.L                   | 3 | 4.37 | 0.31 | -3.49 |
| IPI00218192 | Isoform 2 of Inter-alpha-trypsin inhibitor heavy chain H4 precursor | K.NGIDIYSLTVDSR.V                      | 2 | 4.00 | 0.40 | -2.27 |
| IPI00218192 | Isoform 2 of Inter-alpha-trypsin inhibitor heavy chain H4 precursor | K.NPLVWVHASPEHVVTR.N                   | 3 | 5.38 | 0.52 | -5.11 |
| IPI00218192 | Isoform 2 of Inter-alpha-trypsin inhibitor heavy chain H4 precursor | K.NVVFVIDK.S                           | 1 | 2.65 | 0.17 | -3.16 |
| IPI00218192 | Isoform 2 of Inter-alpha-trypsin inhibitor heavy chain H4 precursor | K.NVVFVIDK.S                           | 2 | 2.33 | 0.25 | -2.47 |
| IPI00218192 | Isoform 2 of Inter-alpha-trypsin inhibitor heavy chain H4 precursor | K.NVVFVIDKSGSM*SGR.K                   | 2 | 3.23 | 0.30 | -0.83 |
| IPI00218192 | Isoform 2 of Inter-alpha-trypsin inhibitor heavy chain H4 precursor | K.NVVFVIDKSGSM*SGR.K                   | 3 | 2.51 | 0.33 | 0.12  |
| IPI00218192 | Isoform 2 of Inter-alpha-trypsin inhibitor heavy chain H4 precursor | K.NVVFVIDKSGSM*SGRK.I                  | 3 | 2.46 | 0.25 | -2.31 |
| IPI00218192 | Isoform 2 of Inter-alpha-trypsin inhibitor heavy chain H4 precursor | K.SPEQQETVLDGNLIIR.Y                   | 2 | 5.01 | 0.44 | -6.49 |
| IPI00218192 | Isoform 2 of Inter-alpha-trypsin inhibitor heavy chain H4 precursor | K.SPEQQETVLDGNLIIR.Y                   | 3 | 4.19 | 0.20 | -4.28 |
| IPI00218192 | Isoform 2 of Inter-alpha-trypsin inhibitor heavy chain H4 precursor | K.TGLLLLSDPKVTIGLLFWDGR.G              | 3 | 2.86 | 0.28 | -4.01 |
| IPI00218192 | Isoform 2 of Inter-alpha-trypsin inhibitor heavy chain H4 precursor | K.TGLLLLSDPKVTIGLLFWDGRGEGLR.L         | 4 | 3.72 | 0.15 | -1.76 |
| IPI00218192 | Isoform 2 of Inter-alpha-trypsin inhibitor heavy chain H4 precursor | K.WKETLFSVM*PGLK.M                     | 2 | 4.00 | 0.38 | -2.92 |
| IPI00218192 | Isoform 2 of Inter-alpha-trypsin inhibitor heavy chain H4 precursor | K.WKETLFSVM*PGLK.M                     | 3 | 4.12 | 0.26 | -2.35 |

|             |                                                                     |                                       |   |      |      |       |
|-------------|---------------------------------------------------------------------|---------------------------------------|---|------|------|-------|
| IPI00218192 | Isoform 2 of Inter-alpha-trypsin inhibitor heavy chain H4 precursor | K.YIFHNFM*ER.L                        | 2 | 2.20 | 0.19 | -0.59 |
| IPI00218192 | Isoform 2 of Inter-alpha-trypsin inhibitor heavy chain H4 precursor | R.AISGGSIQIENGYFVHYFAPEGLTTM*PK.N     | 2 | 4.26 | 0.53 | -2.44 |
| IPI00218192 | Isoform 2 of Inter-alpha-trypsin inhibitor heavy chain H4 precursor | R.AISGGSIQIENGYFVHYFAPEGLTTM*PK.N     | 3 | 5.62 | 0.55 | -4.13 |
| IPI00218192 | Isoform 2 of Inter-alpha-trypsin inhibitor heavy chain H4 precursor | R.ANTVQEATFQM*ELPK.K                  | 2 | 5.10 | 0.41 | -4.19 |
| IPI00218192 | Isoform 2 of Inter-alpha-trypsin inhibitor heavy chain H4 precursor | R.ANTVQEATFQM*ELPKK.A                 | 2 | 4.67 | 0.47 | -3.41 |
| IPI00218192 | Isoform 2 of Inter-alpha-trypsin inhibitor heavy chain H4 precursor | R.ANTVQEATFQMELPK.K                   | 2 | 2.99 | 0.34 |       |
| IPI00218192 | Isoform 2 of Inter-alpha-trypsin inhibitor heavy chain H4 precursor | R.DQFNLIVFSTEATQWRPSLVPASAENVK.A      | 2 | 2.36 | 0.40 | -1.90 |
| IPI00218192 | Isoform 2 of Inter-alpha-trypsin inhibitor heavy chain H4 precursor | R.DQFNLIVFSTEATQWRPSLVPASAENVK.A      | 3 | 6.22 | 0.54 | -3.80 |
| IPI00218192 | Isoform 2 of Inter-alpha-trypsin inhibitor heavy chain H4 precursor | R.DQFNLIVFSTEATQWRPSLVPASAENVK.A      | 4 | 6.02 | 0.46 | -3.05 |
| IPI00218192 | Isoform 2 of Inter-alpha-trypsin inhibitor heavy chain H4 precursor | R.DTDRFSSHVGGTLGQFYQEVLWGSPAASDDGRR.T | 5 | 3.34 | 0.21 | -2.57 |
| IPI00218192 | Isoform 2 of Inter-alpha-trypsin inhibitor heavy chain H4 precursor | R.FAHTVVTSR.V                         | 1 | 2.67 | 0.27 | -4.67 |
| IPI00218192 | Isoform 2 of Inter-alpha-trypsin inhibitor heavy chain H4 precursor | R.FAHTVVTSR.V                         | 2 | 2.70 | 0.32 | -2.52 |
| IPI00218192 | Isoform 2 of Inter-alpha-trypsin inhibitor heavy chain H4 precursor | R.FKPTLSQQQK.S                        | 2 | 2.83 | 0.27 | -3.54 |
| IPI00218192 | Isoform 2 of Inter-alpha-trypsin inhibitor heavy chain H4 precursor | R.FKPTLSQQQK.S                        | 3 | 3.30 | 0.14 | -5.23 |
| IPI00218192 | Isoform 2 of Inter-alpha-trypsin inhibitor heavy chain H4 precursor | R.FSSHVGGTLGQFYQEVLWGSPAASDDGRR.T     | 3 | 3.72 | 0.39 | -4.40 |
| IPI00218192 | Isoform 2 of Inter-alpha-trypsin inhibitor heavy chain H4 precursor | R.GPDVLTATVSGK.L                      | 1 | 2.08 | 0.17 | -3.32 |
| IPI00218192 | Isoform 2 of Inter-alpha-trypsin inhibitor heavy chain H4 precursor | R.GPDVLTATVSGK.L                      | 2 | 3.79 | 0.42 | -2.48 |
| IPI00218192 | Isoform 2 of Inter-alpha-trypsin inhibitor heavy chain H4 precursor | R.HRQGPVNLLSDPEQGVVETGQYER.E          | 3 | 5.93 | 0.53 | -1.50 |
| IPI00218192 | Isoform 2 of Inter-alpha-trypsin inhibitor heavy chain H4 precursor | R.HRQGPVNLLSDPEQGVVETGQYER.E          | 4 | 4.28 | 0.39 | -3.92 |
| IPI00218192 | Isoform 2 of Inter-alpha-trypsin inhibitor heavy chain H4 precursor | R.LGVYELLK.V                          | 2 | 3.56 | 0.37 | -2.77 |
| IPI00218192 | Isoform 2 of Inter-alpha-trypsin inhibitor heavy chain H4 precursor | R.LPEGSVSLIILLTDGDPTVGETNPR.S         | 3 | 4.34 | 0.37 | -2.85 |

|             |                                                                     |                                         |   |      |      |       |
|-------------|---------------------------------------------------------------------|-----------------------------------------|---|------|------|-------|
| IPI00218192 | Isoform 2 of Inter-alpha-trypsin inhibitor heavy chain H4 precursor | R.LWAYLTIQQLLEQTVSASDADQQALR.N          | 3 | 5.64 | 0.45 | -6.69 |
| IPI00218192 | Isoform 2 of Inter-alpha-trypsin inhibitor heavy chain H4 precursor | R.M*NFRPGVLSSR.L                        | 2 | 1.63 | 0.05 | -3.59 |
| IPI00218192 | Isoform 2 of Inter-alpha-trypsin inhibitor heavy chain H4 precursor | R.NM*EQFQVSVSVAPNAK.I                   | 2 | 4.78 | 0.45 | -2.79 |
| IPI00218192 | Isoform 2 of Inter-alpha-trypsin inhibitor heavy chain H4 precursor | R.QGPVNLLSDPEQGVEVTGQYER.E              | 2 | 4.85 | 0.50 | -4.06 |
| IPI00218192 | Isoform 2 of Inter-alpha-trypsin inhibitor heavy chain H4 precursor | R.QGPVNLLSDPEQGVEVTGQYER.E              | 3 | 4.86 | 0.43 | -4.91 |
| IPI00218192 | Isoform 2 of Inter-alpha-trypsin inhibitor heavy chain H4 precursor | R.QGPVNLLSDPEQGVEVTGQYER.EK.A           | 3 | 3.33 | 0.24 | -2.48 |
| IPI00218192 | Isoform 2 of Inter-alpha-trypsin inhibitor heavy chain H4 precursor | R.RLDYQEGPPGVEISCWSVEL.-                | 2 | 5.37 | 0.61 | -4.23 |
| IPI00218192 | Isoform 2 of Inter-alpha-trypsin inhibitor heavy chain H4 precursor | R.RLDYQEGPPGVEISCWSVEL.-                | 3 | 4.45 | 0.40 | -3.75 |
| IPI00218192 | Isoform 2 of Inter-alpha-trypsin inhibitor heavy chain H4 precursor | R.RLGVYELLLK.V                          | 2 | 2.32 | 0.09 | -1.65 |
| IPI00218192 | Isoform 2 of Inter-alpha-trypsin inhibitor heavy chain H4 precursor | R.RLGVYELLLK.V                          | 3 | 3.85 | 0.23 | -2.19 |
| IPI00218192 | Isoform 2 of Inter-alpha-trypsin inhibitor heavy chain H4 precursor | R.SFAAGIQALGGTNINDAM*LM*AVQLLDSSNQEER.L | 3 | 3.68 | 0.28 | -7.00 |
| IPI00218192 | Isoform 2 of Inter-alpha-trypsin inhibitor heavy chain H4 precursor | R.SFAAGIQALGGTNINDAM*LM*AVQLLDSSNQEER.L | 4 | 5.25 | 0.47 | -4.79 |
| IPI00218192 | Isoform 2 of Inter-alpha-trypsin inhibitor heavy chain H4 precursor | R.SIQNNVR.E                             | 1 | 1.62 | 0.12 | -4.71 |
| IPI00218192 | Isoform 2 of Inter-alpha-trypsin inhibitor heavy chain H4 precursor | W.VHASPEHVVVTR.N                        | 2 | 3.07 | 0.42 | -1.67 |
| IPI00218292 | Isoform Short of Ubiquitin fusion degradation protein 1 homolog     | R.LNITYPM*LFK.L                         | 2 | 2.33 | 0.25 | -3.68 |
| IPI00218319 | Isoform 2 of Tropomyosin alpha-3 chain                              | K.IQVLQQQADDAEER.A                      | 2 | 4.75 | 0.49 | -4.03 |
| IPI00218319 | Isoform 2 of Tropomyosin alpha-3 chain                              | R.LATALQKLEEAKEADESER.G                 | 3 | 3.26 | 0.29 | -3.58 |
| IPI00218345 | Isoform 2 of Tubulin alpha-3C/D chain                               | K.AYHEQLSVAEITNACFEPANQMVK.C            | 3 | 3.76 | 0.34 | -2.56 |
| IPI00218345 | Isoform 2 of Tubulin alpha-3C/D chain                               | R.AVCMLSNTTAAIEAWAR.L                   | 2 | 4.25 | 0.45 | -1.86 |
| IPI00218345 | Isoform 2 of Tubulin alpha-3C/D chain                               | R.AVCMLSNTTAAIEAWAR.L                   | 3 | 3.49 | 0.23 | -0.91 |
| IPI00218345 | Isoform 2 of Tubulin alpha-3C/D chain                               | R.FDGALNVDLTFEQTNLVYPR.I                | 2 | 5.18 | 0.51 | -1.99 |
| IPI00218345 | Isoform 2 of Tubulin alpha-3C/D chain                               | R.FDGALNVDLTFEQTNLVYPR.I                | 3 | 2.65 | 0.18 | -2.07 |
| IPI00218345 | Isoform 2 of Tubulin alpha-3C/D chain                               | R.LIGQIVSSITASLR.F                      | 2 | 3.90 | 0.47 | -2.68 |
| IPI00218345 | Isoform 2 of Tubulin alpha-3C/D chain                               | R.LIGQIVSSITASLR.F                      | 3 | 2.79 | 0.15 | -0.10 |
| IPI00218398 | Matrix metalloproteinase-14 precursor                               | K.FYGLQVTGK.A                           | 2 | 1.82 | 0.17 | -2.15 |
| IPI00218407 | Fructose-bisphosphate aldolase B                                    | K.VLAAVYK.A                             | 1 | 2.13 | 0.18 | -2.77 |
| IPI00218413 | biotinidase precursor                                               | K.DAQEVHCDEATK.W                        | 2 | 3.79 | 0.44 | -2.50 |

|             |                                                   |                                       |   |      |      |       |
|-------------|---------------------------------------------------|---------------------------------------|---|------|------|-------|
| IPI00218413 | biotinidase precursor                             | K.EGYLHVCSNGLCCYLLYERPTLSK.E          | 3 | 3.64 | 0.32 | -0.21 |
| IPI00218413 | biotinidase precursor                             | K.HVVYPTAWM*NQLPLLAIEIQK.A            | 3 | 3.93 | 0.40 | -6.14 |
| IPI00218413 | biotinidase precursor                             | K.NPVGLIGAENATGETDPSHSK.F             | 3 | 3.66 | 0.43 | -3.05 |
| IPI00218413 | biotinidase precursor                             | K.SHLIIAQVAK.N                        | 1 | 3.17 | 0.23 | -3.88 |
| IPI00218413 | biotinidase precursor                             | K.SHLIIAQVAK.N                        | 2 | 3.04 | 0.29 | -4.69 |
| IPI00218413 | biotinidase precursor                             | K.SRLSSGLVTAALYGR.L                   | 2 | 4.59 | 0.54 | -3.34 |
| IPI00218413 | biotinidase precursor                             | K.VDLITFDTPFAGR.F                     | 2 | 3.81 | 0.48 | -3.62 |
| IPI00218413 | biotinidase precursor                             | R.GDM*FLVANLGTK.E                     | 1 | 2.77 | 0.37 | -1.96 |
| IPI00218413 | biotinidase precursor                             | R.GDM*FLVANLGTK.E                     | 2 | 3.19 | 0.38 | -0.30 |
| IPI00218413 | biotinidase precursor                             | R.LSCM*AIR.G                          | 2 | 2.33 | 0.14 | -2.46 |
| IPI00218413 | biotinidase precursor                             | R.LSSGLVTAALYGR.L                     | 1 | 2.74 | 0.42 | -2.25 |
| IPI00218413 | biotinidase precursor                             | R.LSSGLVTAALYGR.L                     | 2 | 4.29 | 0.44 | -4.09 |
| IPI00218413 | biotinidase precursor                             | R.QEALELM*NQNLDIYEQQVM*TAAQK.D        | 2 | 4.73 | 0.53 | -3.50 |
| IPI00218413 | biotinidase precursor                             | R.QEALELM*NQNLDIYEQQVM*TAAQK.D        | 3 | 6.29 | 0.47 | -4.83 |
| IPI00218413 | biotinidase precursor                             | R.TSIYPFLDFM*PSPQVVR.W                | 2 | 5.52 | 0.59 | -5.75 |
| IPI00218413 | biotinidase precursor                             | R.TSIYPFLDFM*PSPQVVR.W                | 3 | 5.33 | 0.42 | -1.77 |
| IPI00218414 | Carbonic anhydrase 2                              | K.AVQQPDGLAVLGIFLK.V                  | 2 | 4.59 | 0.55 | -3.97 |
| IPI00218414 | Carbonic anhydrase 2                              | K.AVQQPDGLAVLGIFLK.V                  | 3 | 3.41 | 0.25 | -1.98 |
| IPI00218414 | Carbonic anhydrase 2                              | K.VGSAKPLQK.V                         | 2 | 2.75 | 0.05 | -1.69 |
| IPI00218414 | Carbonic anhydrase 2                              | K.VVDVLDSIK.T                         | 2 | 2.60 | 0.23 | -0.53 |
| IPI00218414 | Carbonic anhydrase 2                              | K.YDPSLKPLSVSYDQATSLR.I               | 2 | 3.58 | 0.48 | -3.24 |
| IPI00218414 | Carbonic anhydrase 2                              | K.YDPSLKPLSVSYDQATSLR.I               | 3 | 4.89 | 0.48 | -0.30 |
| IPI00218465 | Phospholipase A-2-activating protein              | K.CMMLTQGHAAVWAVKILPEQGLMLTGSADKTVK.L | 3 | 3.47 | 0.10 |       |
| IPI00218474 | Beta-enolase                                      | K.ACNCLLLK.V                          | 2 | 2.34 | 0.07 | -0.79 |
| IPI00218474 | Beta-enolase                                      | K.YNQLM*R.I                           | 2 | 2.01 | 0.11 | -2.49 |
| IPI00218474 | Beta-enolase                                      | R.AAVPSGASTGIYEALER.D                 | 2 | 5.65 | 0.33 | -8.46 |
| IPI00218474 | Beta-enolase                                      | R.AAVPSGASTGIYEALER.D                 | 3 | 4.37 | 0.39 | -3.26 |
| IPI00218474 | Beta-enolase                                      | R.SGETEDTFIADLVVGLCTGQIK.T            | 2 | 5.97 | 0.60 | -5.74 |
| IPI00218474 | Beta-enolase                                      | R.SGETEDTFIADLVVGLCTGQIK.T            | 3 | 4.50 | 0.40 | -3.18 |
| IPI00218487 | Gap junction alpha-1 protein                      | K.LAAGHELQPLAIVDQRPSSR.A              | 3 | 2.18 | 0.15 | -3.82 |
| IPI00218487 | Gap junction alpha-1 protein                      | K.LAAGHELQPLAIVDQRPSSR.A              | 4 | 2.50 | 0.21 | -3.73 |
| IPI00218493 | Hypoxanthine-guanine phosphoribosyltransferase    | K.FFADLLDYIK.A                        | 2 | 3.79 | 0.36 | -2.53 |
| IPI00218493 | Hypoxanthine-guanine phosphoribosyltransferase    | K.NVLIVEDIIDTGK.T                     | 2 | 3.75 | 0.42 | -2.52 |
| IPI00218493 | Hypoxanthine-guanine phosphoribosyltransferase    | K.NVLIVEDIIDTGKTM*QTLTSLVRQYNPK.M     | 3 | 3.95 | 0.13 |       |
| IPI00218493 | Hypoxanthine-guanine phosphoribosyltransferase    | K.TM*QTLTSLVR.Q                       | 2 | 3.51 | 0.35 | -1.41 |
| IPI00218493 | Hypoxanthine-guanine phosphoribosyltransferase    | K.VIGDDLSTLTGK.N                      | 2 | 3.30 | 0.38 | -1.59 |
| IPI00218493 | Hypoxanthine-guanine phosphoribosyltransferase    | R.SPGVVISDDEPGYDLDFCIPNHYAEDLER.V     | 3 | 5.10 | 0.48 | -4.19 |
| IPI00218493 | Hypoxanthine-guanine phosphoribosyltransferase    | R.VFIPHGLIM*DR.T                      | 3 | 1.82 | 0.22 | -3.80 |
| IPI00218539 | Isoform B of Collagen alpha-1(XI) chain precursor | K.QLFPGGTFPEDFSILFTVKPK.K             | 3 | 3.25 | 0.32 | -4.67 |
| IPI00218539 | Isoform B of Collagen alpha-1(XI) chain precursor | R.AIVDTNGITVFGTR.I                    | 2 | 1.87 | 0.08 | -4.84 |
| IPI00218539 | Isoform B of Collagen alpha-1(XI) chain precursor | R.ILDEEVFEGDIQQFLITGDPK.A             | 2 | 5.98 | 0.51 | -3.70 |
| IPI00218539 | Isoform B of Collagen alpha-1(XI) chain precursor | R.ILDEEVFEGDIQQFLITGDPK.A             | 3 | 4.92 | 0.41 | -4.32 |

|             |                                                       |                                     |   |      |      |       |
|-------------|-------------------------------------------------------|-------------------------------------|---|------|------|-------|
| IPI00218539 | Isoform B of Collagen alpha-1(XI) chain precursor     | R.SPVFLFEDHTGKPAPE DYPLFR.T         | 3 | 3.98 | 0.41 | -4.64 |
| IPI00218570 | Phosphoglycerate mutase 2                             | K.AM*EAVAAQ GK.A                    | 2 | 2.35 | 0.13 | -1.51 |
| IPI00218570 | Phosphoglycerate mutase 2                             | K.AM*EAVAAQ GK.A                    | 1 | 2.15 | 0.23 | -2.22 |
| IPI00218570 | Phosphoglycerate mutase 2                             | K.AM*EAVAAQ GK.A                    | 2 | 3.45 | 0.34 | -1.27 |
| IPI00218570 | Phosphoglycerate mutase 2                             | R.ALPFWNEEIVPQIK.A                  | 2 | 2.58 | 0.31 | -3.01 |
| IPI00218570 | Phosphoglycerate mutase 2                             | R.KAM*EAVAAQ GK.A                   | 2 | 3.11 | 0.29 | -0.79 |
| IPI00218570 | Phosphoglycerate mutase 2                             | R.VLIAAHGNSLR.G                     | 1 | 2.78 | 0.36 | -0.32 |
| IPI00218570 | Phosphoglycerate mutase 2                             | R.VLIAAHGNSLR.G                     | 2 | 3.18 | 0.32 | -2.03 |
| IPI00218628 | Isoform 2 of Integrin alpha-IIb precursor             | K.ASVQLLVQDSLNP AVK.S               | 2 | 2.73 | 0.10 | -5.37 |
| IPI00218637 | Major histocompatibility complex, class II, DQ beta 2 | K.DFLVQFKGM CYFTNGTERV RGVARYIYNR.E | 3 | 2.55 | 0.05 | 2.84  |
| IPI00218667 | Stathmin-2                                            | K.DLSLEEIQK.K                       | 1 | 2.55 | 0.10 | -1.65 |
| IPI00218667 | Stathmin-2                                            | K.DLSLEEIQK.K                       | 2 | 2.76 | 0.11 | -2.42 |
| IPI00218667 | Stathmin-2                                            | K.DLSLEEIQK.L                       | 2 | 2.45 | 0.10 | -1.69 |
| IPI00218667 | Stathmin-2                                            | K.M*EQIKENR.E                       | 2 | 1.83 | 0.05 | -2.62 |
| IPI00218725 | laminin alpha 2 subunit isoform b precursor           | K.ADDKIYFGGLPTLR.N                  | 3 | 3.16 | 0.19 | -1.21 |
| IPI00218725 | laminin alpha 2 subunit isoform b precursor           | K.AEECYDENVAR.R                     | 2 | 3.97 | 0.50 | -3.82 |
| IPI00218725 | laminin alpha 2 subunit isoform b precursor           | K.AEQTILPLVDEALQHTTTK.G             | 2 | 4.34 | 0.50 | -2.70 |
| IPI00218725 | laminin alpha 2 subunit isoform b precursor           | K.AEQTILPLVDEALQHTTTK.G             | 3 | 2.61 | 0.20 | -3.67 |
| IPI00218725 | laminin alpha 2 subunit isoform b precursor           | K.FIDFLAIEM*R.K                     | 2 | 3.26 | 0.36 | -4.57 |
| IPI00218725 | laminin alpha 2 subunit isoform b precursor           | K.IQDM*SGWYLTDL PGR.I               | 2 | 2.11 | 0.14 | -2.62 |
| IPI00218725 | laminin alpha 2 subunit isoform b precursor           | K.KGSYNNIVVNVK.T                    | 2 | 2.91 | 0.14 | -2.86 |
| IPI00218725 | laminin alpha 2 subunit isoform b precursor           | K.LM*FHVDNGAGR.F                    | 3 | 3.16 | 0.31 | -4.83 |
| IPI00218725 | laminin alpha 2 subunit isoform b precursor           | K.LPPM*SEELNDKIDDL SQEIKDR.K        | 4 | 3.05 | 0.26 | -1.65 |
| IPI00218725 | laminin alpha 2 subunit isoform b precursor           | K.LVEHVP GQPVR.N                    | 3 | 3.35 | 0.19 | -4.38 |
| IPI00218725 | laminin alpha 2 subunit isoform b precursor           | K.M*DGM*GIEM*IDEK.L                 | 2 | 3.84 | 0.45 | -3.84 |
| IPI00218725 | laminin alpha 2 subunit isoform b precursor           | K.NLEQEADRLIDK.L                    | 2 | 3.26 | 0.09 | -1.88 |
| IPI00218725 | laminin alpha 2 subunit isoform b precursor           | K.TAVADNLLFYLGSAK.F                 | 2 | 5.60 | 0.55 | -3.10 |
| IPI00218725 | laminin alpha 2 subunit isoform b precursor           | K.TGFGGVSCDR.C                      | 2 | 2.96 | 0.28 | -0.71 |
| IPI00218725 | laminin alpha 2 subunit isoform b precursor           | K.TNAVVKDPSK.N                      | 2 | 2.29 | 0.18 | -0.46 |
| IPI00218725 | laminin alpha 2 subunit isoform b precursor           | K.VSVSSGGDCIR.T                     | 2 | 3.42 | 0.25 | -2.13 |
| IPI00218725 | laminin alpha 2 subunit isoform b precursor           | K.VTADGEQTGQDAER.T                  | 2 | 4.44 | 0.42 | -3.56 |
| IPI00218725 | laminin alpha 2 subunit isoform b precursor           | K.YYGDDPR.V                         | 2 | 1.80 | 0.19 | -3.38 |
| IPI00218725 | laminin alpha 2 subunit isoform b precursor           | R.CALGYYGIVK.G                      | 2 | 2.24 | 0.17 | -2.14 |
| IPI00218725 | laminin alpha 2 subunit isoform b precursor           | R.EETGFSTYNPQVIIR.G                 | 2 | 4.15 | 0.42 | 1.30  |
| IPI00218725 | laminin alpha 2 subunit isoform b precursor           | R.INHADFATVQLR.N                    | 2 | 3.31 | 0.40 | -4.73 |
| IPI00218725 | laminin alpha 2 subunit isoform b precursor           | R.ISEISM*EVAEQGR.G                  | 2 | 4.22 | 0.39 | -2.06 |
| IPI00218725 | laminin alpha 2 subunit isoform b precursor           | R.LADEINSIIDYVEDIQT.K.L             | 3 | 4.54 | 0.30 | -3.42 |
| IPI00218725 | laminin alpha 2 subunit isoform b precursor           | R.NSHIAIAFDDTK.V                    | 3 | 3.11 | 0.07 | -3.64 |
| IPI00218725 | laminin alpha 2 subunit isoform b precursor           | R.NSHIAIAFDDTKVK.N                  | 2 | 3.64 | 0.52 | -2.09 |
| IPI00218725 | laminin alpha 2 subunit isoform b precursor           | R.NSHIAIAFDDTKVK.N                  | 3 | 3.51 | 0.20 | -1.01 |
| IPI00218725 | laminin alpha 2 subunit isoform b precursor           | R.QALPHSYYSAPAPYLG NK.L             | 3 | 2.79 | 0.08 | -4.37 |



|             |                                                                |                                        |   |      |      |       |
|-------------|----------------------------------------------------------------|----------------------------------------|---|------|------|-------|
| IPI00218725 | laminin alpha 2 subunit isoform b precursor                    | R.SLGLICDGCPVGYTGPR.C                  | 2 | 4.89 | 0.49 | -3.74 |
| IPI00218725 | laminin alpha 2 subunit isoform b precursor                    | R.TFSSALLM*YLATR.D                     | 2 | 2.50 | 0.07 | -3.28 |
| IPI00218725 | laminin alpha 2 subunit isoform b precursor                    | R.TPYNILSSPDYVGVTK.G                   | 2 | 4.74 | 0.37 | -3.93 |
| IPI00218725 | laminin alpha 2 subunit isoform b precursor                    | R.TWVTLKAEQTILPLVDEALQHTTTK.G          | 4 | 2.63 | 0.13 | -3.17 |
| IPI00218725 | laminin alpha 2 subunit isoform b precursor                    | R.VAPQQDDLSPQQISISNAEAR.Q              | 2 | 5.64 | 0.57 | -3.65 |
| IPI00218725 | laminin alpha 2 subunit isoform b precursor                    | R.VAPQQDDLSPQQISISNAEAR.Q              | 3 | 4.04 | 0.32 | -3.91 |
| IPI00218730 | Rod cGMP-specific 3',5'-cyclic phosphodiesterase subunit alpha | R.KEWKALADEYDAKM*KVQEEKK.Q             | 3 | 4.08 | 0.06 |       |
| IPI00218732 | Serum paraoxonase/arylesterase 1                               | K.FDVSSFNPHGISTFTDEDNAM*YLLVVNHPDAK.S  | 4 | 2.99 | 0.15 | -0.38 |
| IPI00218732 | Serum paraoxonase/arylesterase 1                               | K.FQEEKSLHLK.T                         | 2 | 3.87 | 0.21 |       |
| IPI00218732 | Serum paraoxonase/arylesterase 1                               | K.FQEEKSLHLK.T                         | 3 | 3.31 | 0.14 |       |
| IPI00218732 | Serum paraoxonase/arylesterase 1                               | K.GIETGSEDM*EILPNGLAFISSGLKYPGIK.S     | 3 | 6.56 | 0.56 |       |
| IPI00218732 | Serum paraoxonase/arylesterase 1                               | K.IFFYDSENPPASEVLR.I                   | 2 | 5.55 | 0.42 |       |
| IPI00218732 | Serum paraoxonase/arylesterase 1                               | K.IFFYDSENPPASEVLR.I                   | 3 | 4.10 | 0.17 |       |
| IPI00218732 | Serum paraoxonase/arylesterase 1                               | K.ILLM*DLNEEDPTVLELGITGSK.F            | 2 | 5.33 | 0.50 | -3.35 |
| IPI00218732 | Serum paraoxonase/arylesterase 1                               | K.ILLM*DLNEEDPTVLELGITGSK.F            | 3 | 4.92 | 0.33 | -3.26 |
| IPI00218732 | Serum paraoxonase/arylesterase 1                               | K.SFNPNSPGK.I                          | 1 | 1.71 | 0.13 | -4.00 |
| IPI00218732 | Serum paraoxonase/arylesterase 1                               | K.SFNPNSPGK.I                          | 2 | 1.93 | 0.15 | -0.70 |
| IPI00218732 | Serum paraoxonase/arylesterase 1                               | K.SLDFNTLVDNISVDPETGDLVWGCHPNGM*K.I    | 3 | 5.89 | 0.49 | -4.62 |
| IPI00218732 | Serum paraoxonase/arylesterase 1                               | K.STVELFKFQEEK.S                       | 2 | 3.03 | 0.16 |       |
| IPI00218732 | Serum paraoxonase/arylesterase 1                               | K.STVELFKFQEEKSLHLK.T                  | 3 | 4.17 | 0.29 |       |
| IPI00218732 | Serum paraoxonase/arylesterase 1                               | K.YVYIAELLAHK.I                        | 2 | 2.99 | 0.32 |       |
| IPI00218732 | Serum paraoxonase/arylesterase 1                               | K.YVYIAELLAHK.I                        | 3 | 2.79 | 0.26 |       |
| IPI00218732 | Serum paraoxonase/arylesterase 1                               | R.EVQVVELPNCNLVK.G                     | 2 | 3.01 | 0.10 |       |
| IPI00218732 | Serum paraoxonase/arylesterase 1                               | R.IQNILTEEPK.V                         | 2 | 3.92 | 0.25 | -3.01 |
| IPI00218732 | Serum paraoxonase/arylesterase 1                               | R.LNALREVQPVELPNCNLVK.G                | 2 | 5.48 | 0.31 |       |
| IPI00218732 | Serum paraoxonase/arylesterase 1                               | R.LNALREVQPVELPNCNLVK.G                | 3 | 4.89 | 0.24 |       |
| IPI00218733 | Superoxide dismutase                                           | A.DDLGKGGNEESTK.T                      | 2 | 3.42 | 0.32 | -2.49 |
| IPI00218733 | Superoxide dismutase                                           | K.ADDLGKGGNEESTK.T                     | 2 | 3.85 | 0.41 | -4.59 |
| IPI00218733 | Superoxide dismutase                                           | K.ADDLGKGGNEESTK.T                     | 3 | 2.06 | 0.18 | -1.73 |
| IPI00218733 | Superoxide dismutase                                           | K.ADDLGKGGNEESTKTGNAGSR.L              | 2 | 5.70 | 0.63 | -4.17 |
| IPI00218733 | Superoxide dismutase                                           | K.ADDLGKGGNEESTKTGNAGSR.L              | 3 | 4.47 | 0.38 | -3.59 |
| IPI00218733 | Superoxide dismutase                                           | K.ADDLGKGGNEESTKTGNAGSR.L              | 4 | 3.90 | 0.35 | -1.89 |
| IPI00218733 | Superoxide dismutase                                           | K.AVCVLKGDGPVQGIINFEQK.E               | 2 | 5.26 | 0.55 | -2.59 |
| IPI00218733 | Superoxide dismutase                                           | K.AVCVLKGDGPVQGIINFEQK.E               | 3 | 5.73 | 0.50 | -4.55 |
| IPI00218733 | Superoxide dismutase                                           | K.AVCVLKGDGPVQGIINFEQKES.N             | 2 | 5.22 | 0.57 | -3.68 |
| IPI00218733 | Superoxide dismutase                                           | K.AVCVLKGDGPVQGIINFEQKES.N             | 3 | 4.42 | 0.52 | -4.05 |
| IPI00218733 | Superoxide dismutase                                           | K.AVCVLKGDGPVQGIINFEQKESNGPVK.V        | 3 | 5.31 | 0.44 | -3.24 |
| IPI00218733 | Superoxide dismutase                                           | K.AVCVLKGDGPVQGIINFEQKESNGPVK.V        | 4 | 3.62 | 0.23 | -0.13 |
| IPI00218733 | Superoxide dismutase                                           | K.AVCVLKGDGPVQGIINFEQKESNGPVK.VWGSIK.G | 4 | 3.97 | 0.13 | -4.81 |
| IPI00218733 | Superoxide dismutase                                           | K.DGVADVSIEDSVISLSDHCHIIGR.T           | 3 | 2.87 | 0.20 | -2.14 |
| IPI00218733 | Superoxide dismutase                                           | K.GDGPVQGIINFEQK.E                     | 1 | 2.18 | 0.41 | -3.95 |

|             |                                                                      |                                               |   |      |      |       |
|-------------|----------------------------------------------------------------------|-----------------------------------------------|---|------|------|-------|
| IPI00218733 | Superoxide dismutase                                                 | K.GDGPVQGIINFEQK.E                            | 2 | 4.19 | 0.44 | -5.44 |
| IPI00218733 | Superoxide dismutase                                                 | K.GDGPVQGIINFEQK.E                            | 3 | 4.39 | 0.31 | -1.63 |
| IPI00218733 | Superoxide dismutase                                                 | K.GDGPVQGIINFEQKES.N                          | 2 | 4.31 | 0.35 | -3.91 |
| IPI00218733 | Superoxide dismutase                                                 | K.GDGPVQGIINFEQKESNGPVK.V                     | 2 | 2.99 | 0.29 | 2.26  |
| IPI00218733 | Superoxide dismutase                                                 | K.GDGPVQGIINFEQKESNGPVK.V                     | 3 | 3.07 | 0.25 | -3.31 |
| IPI00218733 | Superoxide dismutase                                                 | K.GLTEGLHGFHVHEFGDN.T                         | 2 | 3.42 | 0.48 | -3.06 |
| IPI00218733 | Superoxide dismutase                                                 | K.TGNAGSRLACGVIGIAQ.-                         | 2 | 2.91 | 0.23 | -3.30 |
| IPI00218733 | Superoxide dismutase                                                 | R.HVGD LGNV TADK.D                            | 2 | 3.82 | 0.40 | -2.58 |
| IPI00218733 | Superoxide dismutase                                                 | R.HVGD LGNV TADKDG VADV SIEDSVISLSGDH.C       | 3 | 5.00 | 0.48 | -2.39 |
| IPI00218733 | Superoxide dismutase                                                 | R.HVGD LGNV TADKDG VADV SIEDSVISLSGDH CIIGR.T | 3 | 6.19 | 0.57 | -2.85 |
| IPI00218733 | Superoxide dismutase                                                 | R.HVGD LGNV TADKDG VADV SIEDSVISLSGDH CIIGR.T | 4 | 6.17 | 0.54 | -6.66 |
| IPI00218733 | Superoxide dismutase                                                 | R.HVGD LGNV TADKDG VADV SIEDSVISLSGDH CIIGR.T | 5 | 3.28 | 0.22 | -3.31 |
| IPI00218733 | Superoxide dismutase                                                 | R.LACGVIGIAQ.-                                | 2 | 2.16 | 0.10 | -2.96 |
| IPI00218733 | Superoxide dismutase                                                 | R.TLVVHEK.A                                   | 1 | 1.73 | 0.22 | -3.95 |
| IPI00218733 | Superoxide dismutase                                                 | R.TLVVHEK.A                                   | 2 | 2.23 | 0.21 | -3.52 |
| IPI00218733 | Superoxide dismutase                                                 | R.TLVVHEKADDLGK.G                             | 2 | 4.07 | 0.46 | -2.86 |
| IPI00218733 | Superoxide dismutase                                                 | R.TLVVHEKADDLGK.G                             | 3 | 1.96 | 0.19 | -2.48 |
| IPI00218733 | Superoxide dismutase                                                 | R.TLVVHEKADDLGKGGNEESTK.T                     | 2 | 6.21 | 0.54 | -2.17 |
| IPI00218733 | Superoxide dismutase                                                 | R.TLVVHEKADDLGKGGNEESTK.T                     | 3 | 5.59 | 0.55 | -2.26 |
| IPI00218733 | Superoxide dismutase                                                 | R.TLVVHEKADDLGKGGNEESTK.T                     | 4 | 2.68 | 0.25 | -2.07 |
| IPI00218733 | Superoxide dismutase                                                 | R.TLVVHEKADDLGKGGNEESTKTGNAGSR.L              | 3 | 5.76 | 0.47 | -4.36 |
| IPI00218733 | Superoxide dismutase                                                 | R.TLVVHEKADDLGKGGNEESTKTGNAGSR.L              | 4 | 4.67 | 0.43 | -3.43 |
| IPI00218795 | L-selectin precursor                                                 | K.AEIEYLEK.T                                  | 2 | 2.30 | 0.08 | -0.39 |
| IPI00218795 | L-selectin precursor                                                 | R.SYYWIGIR.K                                  | 2 | 2.69 | 0.22 | -1.50 |
| IPI00218820 | Isoform 3 of Tropomyosin beta chain                                  | R.LATALQKLEEAKEKADESER.G                      | 3 | 3.26 | 0.29 | -3.58 |
| IPI00218834 | Low affinity immunoglobulin gamma Fc region receptor III-A precursor | K.AVVFLPQWYR.V                                | 2 | 3.48 | 0.36 | -4.12 |
| IPI00218834 | Low affinity immunoglobulin gamma Fc region receptor III-A precursor | K.DSGSYFCR.G                                  | 2 | 1.98 | 0.05 | -2.95 |
| IPI00218834 | Low affinity immunoglobulin gamma Fc region receptor III-A precursor | K.VTYLQNGK.D                                  | 2 | 2.29 | 0.12 | -0.35 |
| IPI00218834 | Low affinity immunoglobulin gamma Fc region receptor III-A precursor | S.VLEKDSVTLK.C                                | 2 | 3.52 | 0.36 | -3.30 |
| IPI00218874 | Isoform B of Osteopontin precursor                                   | A.IPVKQADSGSSEEK.Q                            | 2 | 4.30 | 0.41 | -3.26 |
| IPI00218874 | Isoform B of Osteopontin precursor                                   | A.IPVKQADSGSSEEK.Q                            | 3 | 3.57 | 0.39 | -1.59 |
| IPI00218874 | Isoform B of Osteopontin precursor                                   | A.NDESNEHSDVIDSQELSK.V                        | 2 | 5.40 | 0.44 | -3.67 |
| IPI00218874 | Isoform B of Osteopontin precursor                                   | A.NDESNEHSDVIDSQELSK.V                        | 3 | 3.92 | 0.45 | -2.77 |
| IPI00218874 | Isoform B of Osteopontin precursor                                   | H.SVIDSQELSK.V                                | 2 | 2.94 | 0.30 | -1.60 |
| IPI00218874 | Isoform B of Osteopontin precursor                                   | I.PVAQDLNAPSDWDSR.G                           | 2 | 4.56 | 0.45 | -2.57 |
| IPI00218874 | Isoform B of Osteopontin precursor                                   | I.PVKQADSGSSEEK.Q                             | 2 | 3.25 | 0.38 | -1.07 |
| IPI00218874 | Isoform B of Osteopontin precursor                                   | K.AIPVAQDLNAPSD.W                             | 2 | 3.80 | 0.53 | -3.31 |
| IPI00218874 | Isoform B of Osteopontin precursor                                   | K.AIPVAQDLNAPSDWDSR.G                         | 2 | 5.21 | 0.53 | -4.53 |

|             |                                    |                                      |   |      |      |       |
|-------------|------------------------------------|--------------------------------------|---|------|------|-------|
| IPI00218874 | Isoform B of Osteopontin precursor | K.AIPVAQDLNAPSDWDSR.G                | 3 | 4.02 | 0.40 | -3.55 |
| IPI00218874 | Isoform B of Osteopontin precursor | K.ANDESNEHSDVIDSQELSK.V              | 2 | 5.61 | 0.55 | -3.29 |
| IPI00218874 | Isoform B of Osteopontin precursor | K.ANDESNEHSDVIDSQELSK.V              | 3 | 4.89 | 0.34 | -3.60 |
| IPI00218874 | Isoform B of Osteopontin precursor | K.DSYETSQLDDQSAETHSHK.Q              | 2 | 5.84 | 0.65 | -2.86 |
| IPI00218874 | Isoform B of Osteopontin precursor | K.DSYETSQLDDQSAETHSHK.Q              | 3 | 2.98 | 0.25 | -1.85 |
| IPI00218874 | Isoform B of Osteopontin precursor | K.DSYETSQLDDQSAETHSHK.Q              | 4 | 3.22 | 0.27 | -0.90 |
| IPI00218874 | Isoform B of Osteopontin precursor | K.DSYETSQLDDQSAETHSHKQS.R            | 2 | 5.31 | 0.57 | -3.55 |
| IPI00218874 | Isoform B of Osteopontin precursor | K.DSYETSQLDDQSAETHSHKQS.R.L          | 3 | 3.78 | 0.44 | -4.42 |
| IPI00218874 | Isoform B of Osteopontin precursor | K.FRISHELDSASSE.V                    | 2 | 3.47 | 0.35 | -1.77 |
| IPI00218874 | Isoform B of Osteopontin precursor | K.FRISHELDSASSEVN.-                  | 2 | 4.27 | 0.49 | -4.28 |
| IPI00218874 | Isoform B of Osteopontin precursor | K.FRRPDIQYPDATDEEDITSHM*ESEELNGAYK.A | 4 | 4.32 | 0.48 | -2.71 |
| IPI00218874 | Isoform B of Osteopontin precursor | K.QLYNKYPDAVATWLNPDPSQK.Q            | 3 | 3.40 | 0.26 | -3.78 |
| IPI00218874 | Isoform B of Osteopontin precursor | K.QLYNKYPDAVATWLNPDPSQKQN.L          | 3 | 4.15 | 0.31 | -2.77 |
| IPI00218874 | Isoform B of Osteopontin precursor | K.RKANDESNEHSDVIDSQELSK.V            | 3 | 4.24 | 0.40 | -4.10 |
| IPI00218874 | Isoform B of Osteopontin precursor | K.RKANDESNEHSDVIDSQELSK.V            | 4 | 3.58 | 0.47 | -2.79 |
| IPI00218874 | Isoform B of Osteopontin precursor | K.SKEEDKHLKF.R                       | 2 | 2.90 | 0.27 | -3.89 |
| IPI00218874 | Isoform B of Osteopontin precursor | L.DDQSAETHSHK.Q                      | 2 | 3.41 | 0.34 | -3.47 |
| IPI00218874 | Isoform B of Osteopontin precursor | N.DESNEHSDVIDSQELSK.V                | 2 | 5.48 | 0.49 | -3.53 |
| IPI00218874 | Isoform B of Osteopontin precursor | N.EHSDVIDSQELSK.V                    | 2 | 4.20 | 0.39 | -4.84 |
| IPI00218874 | Isoform B of Osteopontin precursor | P.VAQDLNAPSDWDSR.G                   | 2 | 4.52 | 0.49 | -2.52 |
| IPI00218874 | Isoform B of Osteopontin precursor | R.EFHSHEFHSHED.M                     | 2 | 2.99 | 0.46 | -4.79 |
| IPI00218874 | Isoform B of Osteopontin precursor | R.EFHSHEFHSHEDM*LVVDPK.S             | 2 | 2.30 | 0.41 | -3.82 |
| IPI00218874 | Isoform B of Osteopontin precursor | R.EFHSHEFHSHEDM*LVVDPK.S             | 3 | 2.79 | 0.21 | -4.47 |
| IPI00218874 | Isoform B of Osteopontin precursor | R.EFHSHEFHSHEDM*LVVDPK.S             | 4 | 2.23 | 0.11 | -2.53 |
| IPI00218874 | Isoform B of Osteopontin precursor | R.GDSVYGLR.S                         | 1 | 1.96 | 0.31 | -2.54 |
| IPI00218874 | Isoform B of Osteopontin precursor | R.GDSVYGLR.S                         | 2 | 3.38 | 0.24 | -3.18 |
| IPI00218874 | Isoform B of Osteopontin precursor | R.GKDSYETSQLDDQSAETH.S               | 3 | 3.98 | 0.35 | -1.82 |
| IPI00218874 | Isoform B of Osteopontin precursor | R.GKDSYETSQLDDQSAETHS.H              | 2 | 6.10 | 0.61 | -1.71 |
| IPI00218874 | Isoform B of Osteopontin precursor | R.GKDSYETSQLDDQSAETHS.H              | 3 | 3.58 | 0.40 | -2.88 |
| IPI00218874 | Isoform B of Osteopontin precursor | R.GKDSYETSQLDDQSAETHSH.K             | 3 | 5.23 | 0.50 | -2.21 |
| IPI00218874 | Isoform B of Osteopontin precursor | R.GKDSYETSQLDDQSAETHSHK.Q            | 2 | 6.71 | 0.52 | -2.98 |
| IPI00218874 | Isoform B of Osteopontin precursor | R.GKDSYETSQLDDQSAETHSHK.Q            | 3 | 6.02 | 0.59 | -4.98 |
| IPI00218874 | Isoform B of Osteopontin precursor | R.GKDSYETSQLDDQSAETHSHK.Q            | 4 | 3.89 | 0.25 | -2.95 |
| IPI00218874 | Isoform B of Osteopontin precursor | R.GKDSYETSQLDDQSAETHSHK.Q            | 5 | 2.86 | 0.32 | 0.25  |
| IPI00218874 | Isoform B of Osteopontin precursor | R.GKDSYETSQLDDQSAETHSHKQ.S           | 2 | 5.03 | 0.53 | -3.50 |
| IPI00218874 | Isoform B of Osteopontin precursor | R.GKDSYETSQLDDQSAETHSHKQ.S           | 3 | 5.41 | 0.55 | -3.11 |
| IPI00218874 | Isoform B of Osteopontin precursor | R.GKDSYETSQLDDQSAETHSHKQS.R          | 2 | 6.09 | 0.58 | -3.46 |
| IPI00218874 | Isoform B of Osteopontin precursor | R.GKDSYETSQLDDQSAETHSHKQS.R          | 3 | 6.61 | 0.56 | -4.74 |
| IPI00218874 | Isoform B of Osteopontin precursor | R.ISHELDSASSE.E                      | 1 | 2.13 | 0.46 | -2.76 |
| IPI00218874 | Isoform B of Osteopontin precursor | R.ISHELDSASSE.V                      | 1 | 2.80 | 0.42 | -4.07 |
| IPI00218874 | Isoform B of Osteopontin precursor | R.ISHELDSASSE.V                      | 2 | 3.11 | 0.28 | -2.99 |
| IPI00218874 | Isoform B of Osteopontin precursor | R.ISHELDSASSEVN.-                    | 1 | 4.12 | 0.49 | -4.10 |

|             |                                    |                                         |   |      |      |       |
|-------------|------------------------------------|-----------------------------------------|---|------|------|-------|
| IPI00218874 | Isoform B of Osteopontin precursor | R.ISHELDSASSEVN.-                       | 2 | 3.69 | 0.44 | -4.48 |
| IPI00218874 | Isoform B of Osteopontin precursor | R.KANDESNEHSDVIDSQELSK.V                | 2 | 5.74 | 0.57 | -5.59 |
| IPI00218874 | Isoform B of Osteopontin precursor | R.KANDESNEHSDVIDSQELSK.V                | 3 | 6.60 | 0.56 | -4.99 |
| IPI00218874 | Isoform B of Osteopontin precursor | R.RPDIQYPDATDEDITSHM*ESEEL.L            | 3 | 4.37 | 0.38 | -3.52 |
| IPI00218874 | Isoform B of Osteopontin precursor | R.RPDIQYPDATDEDITSHM*ESEELNGAYK.A       | 3 | 6.46 | 0.61 | -2.73 |
| IPI00218874 | Isoform B of Osteopontin precursor | R.RPDIQYPDATDEDITSHM*ESEELNGAYK.A       | 4 | 5.82 | 0.51 | -2.59 |
| IPI00218874 | Isoform B of Osteopontin precursor | S.DVIDSQELSK.V                          | 2 | 3.12 | 0.30 | -2.68 |
| IPI00218874 | Isoform B of Osteopontin precursor | T.SQLDDQSAETHSHK.Q                      | 2 | 3.02 | 0.30 | -2.21 |
| IPI00218874 | Isoform B of Osteopontin precursor | V.AQDLNAPSDWDSR.G                       | 2 | 3.84 | 0.43 | -4.37 |
| IPI00218875 | Isoform C of Osteopontin precursor | A.IPVKQADSGSSEEK.Q                      | 2 | 4.30 | 0.41 | -3.26 |
| IPI00218875 | Isoform C of Osteopontin precursor | A.IPVKQADSGSSEEK.Q                      | 3 | 3.57 | 0.39 | -1.59 |
| IPI00218875 | Isoform C of Osteopontin precursor | A.IPVKQADSGSSEEKQNAVSSSEETNDFKQETLPSK.S | 4 | 5.26 | 0.51 | -4.49 |
| IPI00218875 | Isoform C of Osteopontin precursor | A.NDESNEHSDVIDSQELSK.V                  | 2 | 5.40 | 0.44 | -3.67 |
| IPI00218875 | Isoform C of Osteopontin precursor | A.NDESNEHSDVIDSQELSK.V                  | 3 | 3.92 | 0.45 | -2.77 |
| IPI00218875 | Isoform C of Osteopontin precursor | A.VSSEETNDFKQETLPSK.S                   | 2 | 4.68 | 0.37 | -1.91 |
| IPI00218875 | Isoform C of Osteopontin precursor | H.SDVIDSQELSK.V                         | 2 | 2.94 | 0.30 | -1.60 |
| IPI00218875 | Isoform C of Osteopontin precursor | I.PVAQDLNAPSDWDSR.G                     | 2 | 4.56 | 0.45 | -2.57 |
| IPI00218875 | Isoform C of Osteopontin precursor | I.PVKQADSGSSEEK.Q                       | 2 | 3.25 | 0.38 | -1.07 |
| IPI00218875 | Isoform C of Osteopontin precursor | K.AIPVAQDLNAPSD.W                       | 2 | 3.80 | 0.53 | -3.31 |
| IPI00218875 | Isoform C of Osteopontin precursor | K.AIPVAQDLNAPSDWDSR.G                   | 2 | 5.21 | 0.53 | -4.53 |
| IPI00218875 | Isoform C of Osteopontin precursor | K.AIPVAQDLNAPSDWDSR.G                   | 3 | 4.02 | 0.40 | -3.55 |
| IPI00218875 | Isoform C of Osteopontin precursor | K.ANDESNEHSDVIDSQELSK.V                 | 2 | 5.61 | 0.55 | -3.29 |
| IPI00218875 | Isoform C of Osteopontin precursor | K.ANDESNEHSDVIDSQELSK.V                 | 3 | 4.89 | 0.34 | -3.60 |
| IPI00218875 | Isoform C of Osteopontin precursor | K.DSYETSQLDDQSAETHSHK.Q                 | 2 | 5.84 | 0.65 | -2.86 |
| IPI00218875 | Isoform C of Osteopontin precursor | K.DSYETSQLDDQSAETHSHK.Q                 | 3 | 2.98 | 0.25 | -1.85 |
| IPI00218875 | Isoform C of Osteopontin precursor | K.DSYETSQLDDQSAETHSHK.Q                 | 4 | 3.22 | 0.27 | -0.90 |
| IPI00218875 | Isoform C of Osteopontin precursor | K.DSYETSQLDDQSAETHSHKQS.R               | 2 | 5.31 | 0.57 | -3.55 |
| IPI00218875 | Isoform C of Osteopontin precursor | K.DSYETSQLDDQSAETHSHKQSR.L              | 3 | 3.78 | 0.44 | -4.42 |
| IPI00218875 | Isoform C of Osteopontin precursor | K.FRISHELDSASSE.V                       | 2 | 3.47 | 0.35 | -1.77 |
| IPI00218875 | Isoform C of Osteopontin precursor | K.FRISHELDSASSEVN.-                     | 2 | 4.27 | 0.49 | -4.28 |
| IPI00218875 | Isoform C of Osteopontin precursor | K.FRRPDIQYPDATDEDITSHM*ESEELNGAYK.A     | 4 | 4.32 | 0.48 | -2.71 |
| IPI00218875 | Isoform C of Osteopontin precursor | K.QADSGSSEEKQNAVSSSEETNDFKQETLPSK.S     | 3 | 4.09 | 0.38 | -4.51 |
| IPI00218875 | Isoform C of Osteopontin precursor | K.QADSGSSEEKQNAVSSSEETNDFKQETLPSK.S     | 4 | 3.36 | 0.28 | -3.02 |
| IPI00218875 | Isoform C of Osteopontin precursor | K.RKANDESNEHSDVIDSQELSK.V               | 3 | 4.24 | 0.40 | -4.10 |
| IPI00218875 | Isoform C of Osteopontin precursor | K.RKANDESNEHSDVIDSQELSK.V               | 4 | 3.58 | 0.47 | -2.79 |
| IPI00218875 | Isoform C of Osteopontin precursor | K.SKEEDKHLKF.R                          | 2 | 2.90 | 0.27 | -3.89 |
| IPI00218875 | Isoform C of Osteopontin precursor | L.DDQSAETHSHK.Q                         | 2 | 3.41 | 0.34 | -3.47 |
| IPI00218875 | Isoform C of Osteopontin precursor | N.AVSSEETNDFKQETLPSK.S                  | 2 | 4.70 | 0.48 | -2.49 |
| IPI00218875 | Isoform C of Osteopontin precursor | N.AVSSEETNDFKQETLPSK.S                  | 3 | 3.68 | 0.28 | -1.89 |
| IPI00218875 | Isoform C of Osteopontin precursor | N.DESNEHSDVIDSQELSK.V                   | 2 | 5.48 | 0.49 | -3.53 |
| IPI00218875 | Isoform C of Osteopontin precursor | N.EHSDVIDSQELSK.V                       | 2 | 4.20 | 0.39 | -4.84 |
| IPI00218875 | Isoform C of Osteopontin precursor | P.QNAVSSSEETNDFKQETLPSK.S               | 2 | 4.36 | 0.41 | -1.71 |

|             |                                                                                |                                   |   |      |      |       |
|-------------|--------------------------------------------------------------------------------|-----------------------------------|---|------|------|-------|
| IPI00218875 | Isoform C of Osteopontin precursor                                             | P.VAQLNAPSDWDSR.G                 | 2 | 4.52 | 0.49 | -2.52 |
| IPI00218875 | Isoform C of Osteopontin precursor                                             | R.EFHSHEFHSHED.M                  | 2 | 2.99 | 0.46 | -4.79 |
| IPI00218875 | Isoform C of Osteopontin precursor                                             | R.EFHSHEFHSHEDM*LVVDPK.S          | 2 | 2.30 | 0.41 | -3.82 |
| IPI00218875 | Isoform C of Osteopontin precursor                                             | R.EFHSHEFHSHEDM*LVVDPK.S          | 3 | 2.79 | 0.21 | -4.47 |
| IPI00218875 | Isoform C of Osteopontin precursor                                             | R.EFHSHEFHSHEDM*LVVDPK.S          | 4 | 2.23 | 0.11 | -2.53 |
| IPI00218875 | Isoform C of Osteopontin precursor                                             | R.GDSVVYGLR.S                     | 1 | 1.96 | 0.31 | -2.54 |
| IPI00218875 | Isoform C of Osteopontin precursor                                             | R.GDSVVYGLR.S                     | 2 | 3.38 | 0.24 | -3.18 |
| IPI00218875 | Isoform C of Osteopontin precursor                                             | R.GKDSYETSQLDDQSAETH.S            | 3 | 3.98 | 0.35 | -1.82 |
| IPI00218875 | Isoform C of Osteopontin precursor                                             | R.GKDSYETSQLDDQSAETHS.H           | 2 | 6.10 | 0.61 | -1.71 |
| IPI00218875 | Isoform C of Osteopontin precursor                                             | R.GKDSYETSQLDDQSAETHS.H           | 3 | 3.58 | 0.40 | -2.88 |
| IPI00218875 | Isoform C of Osteopontin precursor                                             | R.GKDSYETSQLDDQSAETHSH.K          | 3 | 5.23 | 0.50 | -2.21 |
| IPI00218875 | Isoform C of Osteopontin precursor                                             | R.GKDSYETSQLDDQSAETHSHK.Q         | 2 | 6.71 | 0.52 | -2.98 |
| IPI00218875 | Isoform C of Osteopontin precursor                                             | R.GKDSYETSQLDDQSAETHSHK.Q         | 3 | 6.02 | 0.59 | -4.98 |
| IPI00218875 | Isoform C of Osteopontin precursor                                             | R.GKDSYETSQLDDQSAETHSHK.Q         | 4 | 3.89 | 0.25 | -2.95 |
| IPI00218875 | Isoform C of Osteopontin precursor                                             | R.GKDSYETSQLDDQSAETHSHK.Q         | 5 | 2.86 | 0.32 | 0.25  |
| IPI00218875 | Isoform C of Osteopontin precursor                                             | R.GKDSYETSQLDDQSAETHSHK.Q.S       | 2 | 5.03 | 0.53 | -3.50 |
| IPI00218875 | Isoform C of Osteopontin precursor                                             | R.GKDSYETSQLDDQSAETHSHK.Q.S       | 3 | 5.41 | 0.55 | -3.11 |
| IPI00218875 | Isoform C of Osteopontin precursor                                             | R.GKDSYETSQLDDQSAETHSHKQS.R       | 2 | 6.09 | 0.58 | -3.46 |
| IPI00218875 | Isoform C of Osteopontin precursor                                             | R.GKDSYETSQLDDQSAETHSHKQS.R       | 3 | 6.61 | 0.56 | -4.74 |
| IPI00218875 | Isoform C of Osteopontin precursor                                             | R.ISHELDSASS.E                    | 1 | 2.13 | 0.46 | -2.76 |
| IPI00218875 | Isoform C of Osteopontin precursor                                             | R.ISHELDSASSE.V                   | 1 | 2.80 | 0.42 | -4.07 |
| IPI00218875 | Isoform C of Osteopontin precursor                                             | R.ISHELDSASSE.V                   | 2 | 3.11 | 0.28 | -2.99 |
| IPI00218875 | Isoform C of Osteopontin precursor                                             | R.ISHELDSASSEVN.-                 | 1 | 4.12 | 0.49 | -4.10 |
| IPI00218875 | Isoform C of Osteopontin precursor                                             | R.ISHELDSASSEVN.-                 | 2 | 3.69 | 0.44 | -4.48 |
| IPI00218875 | Isoform C of Osteopontin precursor                                             | R.KANDESNEHSDVIDSQELSK.V          | 2 | 5.74 | 0.57 | -5.59 |
| IPI00218875 | Isoform C of Osteopontin precursor                                             | R.KANDESNEHSDVIDSQELSK.V          | 3 | 6.60 | 0.56 | -4.99 |
| IPI00218875 | Isoform C of Osteopontin precursor                                             | R.RPDIQYPDATDEDITSHM*ESEEL.L      | 3 | 4.37 | 0.38 | -3.52 |
| IPI00218875 | Isoform C of Osteopontin precursor                                             | R.RPDIQYPDATDEDITSHM*ESEELNGAYK.A | 3 | 6.46 | 0.61 | -2.73 |
| IPI00218875 | Isoform C of Osteopontin precursor                                             | R.RPDIQYPDATDEDITSHM*ESEELNGAYK.A | 4 | 5.82 | 0.51 | -2.59 |
| IPI00218875 | Isoform C of Osteopontin precursor                                             | S.DVIDSQELSK.V                    | 2 | 3.12 | 0.30 | -2.68 |
| IPI00218875 | Isoform C of Osteopontin precursor                                             | T.SQLDDQSAETHSHK.Q                | 2 | 3.02 | 0.30 | -2.21 |
| IPI00218875 | Isoform C of Osteopontin precursor                                             | V.AQDLNAPSDWDSR.G                 | 2 | 3.84 | 0.43 | -4.37 |
| IPI00218914 | Retinal dehydrogenase 1                                                        | R.TIPIDGNFFTYTR.H                 | 2 | 2.56 | 0.19 | -4.75 |
| IPI00218918 | Annexin A1                                                                     | K.DITSDTSGDFR.N                   | 2 | 2.94 | 0.27 | -0.97 |
| IPI00218946 | Potassium/sodium hyperpolarization-activated cyclic nucleotide-gated channel 2 | R.DSASPGAAGGLDPQDSAR.S            | 2 | 4.58 | 0.37 | -1.43 |
| IPI00219005 | FK506-binding protein 4                                                        | K.AEASSGDHPTDTEM*KEEQK.S          | 3 | 2.09 | 0.13 | -4.01 |
| IPI00219025 | Glutaredoxin-1                                                                 | K.QGLLEFVDITATNHTNEIQDYLQLTGAR.T  | 3 | 4.36 | 0.40 | -4.93 |
| IPI00219025 | Glutaredoxin-1                                                                 | R.AQEILSQLPIK.Q                   | 2 | 3.78 | 0.31 | -2.52 |
| IPI00219025 | Glutaredoxin-1                                                                 | R.LKQIGALQ.-                      | 2 | 3.26 | 0.10 | -1.20 |
| IPI00219025 | Glutaredoxin-1                                                                 | R.RAQEILSQLPIK.Q                  | 2 | 3.18 | 0.16 | -2.35 |
| IPI00219025 | Glutaredoxin-1                                                                 | R.RAQEILSQLPIK.Q                  | 3 | 2.52 | 0.08 | -0.34 |

|             |                                         |                               |   |      |      |       |
|-------------|-----------------------------------------|-------------------------------|---|------|------|-------|
| IPI00219029 | Aspartate aminotransferase, cytoplasmic | A.LGDDSPALK.E                 | 2 | 3.18 | 0.24 | -3.97 |
| IPI00219029 | Aspartate aminotransferase, cytoplasmic | K.HIYLLPSGR.I                 | 1 | 2.09 | 0.06 | -3.38 |
| IPI00219029 | Aspartate aminotransferase, cytoplasmic | K.HIYLLPSGR.I                 | 2 | 2.62 | 0.35 | -3.10 |
| IPI00219029 | Aspartate aminotransferase, cytoplasmic | K.IANDNSLNHEYLPILGLAEFR.S     | 2 | 5.69 | 0.60 | -3.86 |
| IPI00219029 | Aspartate aminotransferase, cytoplasmic | K.IANDNSLNHEYLPILGLAEFR.S     | 3 | 5.26 | 0.38 | -4.45 |
| IPI00219029 | Aspartate aminotransferase, cytoplasmic | K.LTADFREDPDRK.V              | 3 | 2.39 | 0.07 | -2.01 |
| IPI00219029 | Aspartate aminotransferase, cytoplasmic | K.NFGLYNER.V                  | 1 | 2.16 | 0.07 | -2.31 |
| IPI00219029 | Aspartate aminotransferase, cytoplasmic | K.NFGLYNER.V                  | 2 | 2.46 | 0.06 | -2.51 |
| IPI00219029 | Aspartate aminotransferase, cytoplasmic | K.NLDYVATSIHEAVTK.I           | 2 | 4.19 | 0.48 | -2.82 |
| IPI00219029 | Aspartate aminotransferase, cytoplasmic | K.NLDYVATSIHEAVTK.I           | 3 | 2.50 | 0.27 | -3.35 |
| IPI00219029 | Aspartate aminotransferase, cytoplasmic | K.NLDYVATSIHEAVTKIQ.-         | 3 | 3.04 | 0.31 | -0.97 |
| IPI00219029 | Aspartate aminotransferase, cytoplasmic | K.QVEYLVNEK.H                 | 1 | 2.70 | 0.18 | -3.66 |
| IPI00219029 | Aspartate aminotransferase, cytoplasmic | K.QVEYLVNEK.H                 | 2 | 1.91 | 0.19 | -2.46 |
| IPI00219029 | Aspartate aminotransferase, cytoplasmic | K.QVEYLVNEKHIIYLLPSGR.I       | 3 | 3.20 | 0.31 | -3.38 |
| IPI00219029 | Aspartate aminotransferase, cytoplasmic | K.RVGGVQSLGGTGALR.I           | 2 | 4.18 | 0.46 | -3.65 |
| IPI00219029 | Aspartate aminotransferase, cytoplasmic | K.RVGGVQSLGGTGALR.I           | 3 | 2.55 | 0.09 | -1.84 |
| IPI00219029 | Aspartate aminotransferase, cytoplasmic | K.TPGTWNHITDQIGM*FSFTGLNPK.Q  | 3 | 3.68 | 0.34 | -0.95 |
| IPI00219029 | Aspartate aminotransferase, cytoplasmic | K.VNLGVGAYR.T                 | 1 | 1.70 | 0.19 | -2.44 |
| IPI00219029 | Aspartate aminotransferase, cytoplasmic | K.VNLGVGAYR.T                 | 2 | 3.14 | 0.33 | -1.95 |
| IPI00219029 | Aspartate aminotransferase, cytoplasmic | M.APPSVFAEVPQAQPVLVFK.L       | 2 | 5.93 | 0.58 | -4.21 |
| IPI00219029 | Aspartate aminotransferase, cytoplasmic | M.APPSVFAEVPQAQPVLVFK.L       | 3 | 5.05 | 0.39 | -4.33 |
| IPI00219029 | Aspartate aminotransferase, cytoplasmic | R.FLFPFFDSAYQGFASGNLER.D      | 2 | 5.55 | 0.65 | -5.83 |
| IPI00219029 | Aspartate aminotransferase, cytoplasmic | R.FLFPFFDSAYQGFASGNLER.D      | 3 | 5.85 | 0.47 | -5.30 |
| IPI00219029 | Aspartate aminotransferase, cytoplasmic | R.IGADFLAR.W                  | 2 | 2.95 | 0.27 | -2.61 |
| IPI00219029 | Aspartate aminotransferase, cytoplasmic | R.INVSGLTTK.N                 | 1 | 1.93 | 0.18 | -3.76 |
| IPI00219029 | Aspartate aminotransferase, cytoplasmic | R.INVSGLTTK.N                 | 2 | 2.85 | 0.15 | -2.90 |
| IPI00219029 | Aspartate aminotransferase, cytoplasmic | R.ITWSNPPAQQAR.I              | 2 | 3.87 | 0.36 | -1.27 |
| IPI00219029 | Aspartate aminotransferase, cytoplasmic | R.IVASTLSNPELFEWGTGNV.K       | 2 | 5.83 | 0.62 | -3.56 |
| IPI00219029 | Aspartate aminotransferase, cytoplasmic | R.IVASTLSNPELFEWGTGNV.K       | 3 | 5.63 | 0.41 | -3.69 |
| IPI00219029 | Aspartate aminotransferase, cytoplasmic | R.KVNLGVGAYR.T                | 2 | 2.68 | 0.32 | -3.83 |
| IPI00219029 | Aspartate aminotransferase, cytoplasmic | R.LALGDDSPALK.E               | 1 | 2.50 | 0.24 | -3.61 |
| IPI00219029 | Aspartate aminotransferase, cytoplasmic | R.LALGDDSPALK.E               | 2 | 3.10 | 0.35 | -3.18 |
| IPI00219029 | Aspartate aminotransferase, cytoplasmic | R.TDDCHPWVLPVVK.K             | 3 | 2.99 | 0.32 | -0.92 |
| IPI00219029 | Aspartate aminotransferase, cytoplasmic | R.VGGVQSLGGTGALR.I            | 1 | 2.03 | 0.21 | -2.59 |
| IPI00219029 | Aspartate aminotransferase, cytoplasmic | R.VGGVQSLGGTGALR.I            | 2 | 4.06 | 0.42 | -2.94 |
| IPI00219029 | Aspartate aminotransferase, cytoplasmic | R.VGNLTVVGK.E                 | 2 | 2.83 | 0.19 | -2.29 |
| IPI00219029 | Aspartate aminotransferase, cytoplasmic | R.VGNLTVVGKPEPESILQ.V         | 2 | 4.22 | 0.36 | -1.56 |
| IPI00219029 | Aspartate aminotransferase, cytoplasmic | R.VGNLTVVGKPEPESILQV.L        | 2 | 3.76 | 0.42 | -2.20 |
| IPI00219029 | Aspartate aminotransferase, cytoplasmic | R.VGNLTVVGKPEPESILQVL.S       | 2 | 3.54 | 0.35 | -2.09 |
| IPI00219029 | Aspartate aminotransferase, cytoplasmic | R.VGNLTVVGKPEPESILQVLSQM*EK.I | 2 | 5.19 | 0.52 | -1.82 |
| IPI00219029 | Aspartate aminotransferase, cytoplasmic | R.VGNLTVVGKPEPESILQVLSQM*EK.I | 3 | 4.34 | 0.38 | -2.46 |
| IPI00219029 | Aspartate aminotransferase, cytoplasmic | R.VGNLTVVGKPEPESILQVLSQM*EK.I | 4 | 3.19 | 0.15 | -1.99 |

|             |                                                                       |                                            |   |      |      |       |
|-------------|-----------------------------------------------------------------------|--------------------------------------------|---|------|------|-------|
| IPI00219029 | Aspartate aminotransferase, cytoplasmic                               | R.VGNLTVVGKEPESILQVLSQM*EKIVR.I            | 4 | 3.02 | 0.26 | -2.25 |
| IPI00219029 | Aspartate aminotransferase, cytoplasmic                               | W.ENHNVAVFSAAAGFK.D                        | 2 | 2.97 | 0.32 | -2.96 |
| IPI00219042 | Isoform 3 of Peptidyl-glycine alpha-amidating monooxygenase precursor | D.PNNKEGPVLILGR.S                          | 3 | 3.59 | 0.20 | -0.71 |
| IPI00219042 | Isoform 3 of Peptidyl-glycine alpha-amidating monooxygenase precursor | I.PVDEEAFVIDFKPR.A                         | 3 | 5.08 | 0.47 | -2.28 |
| IPI00219042 | Isoform 3 of Peptidyl-glycine alpha-amidating monooxygenase precursor | K.AGIEVQEIK.E                              | 1 | 2.05 | 0.06 | -3.46 |
| IPI00219042 | Isoform 3 of Peptidyl-glycine alpha-amidating monooxygenase precursor | K.AGIEVQEIK.E                              | 2 | 2.87 | 0.11 | -1.75 |
| IPI00219042 | Isoform 3 of Peptidyl-glycine alpha-amidating monooxygenase precursor | K.AGIEVQEIKDSEHK.L                         | 2 | 3.31 | 0.14 | -3.38 |
| IPI00219042 | Isoform 3 of Peptidyl-glycine alpha-amidating monooxygenase precursor | K.AGIEVQEIKDSEHKLETSSGR.V                  | 3 | 4.78 | 0.51 | -2.78 |
| IPI00219042 | Isoform 3 of Peptidyl-glycine alpha-amidating monooxygenase precursor | K.AGIEVQEIKDSEHKLETSSGR.V                  | 4 | 2.81 | 0.19 | -1.78 |
| IPI00219042 | Isoform 3 of Peptidyl-glycine alpha-amidating monooxygenase precursor | K.ANILYAWAR.N                              | 2 | 3.66 | 0.33 | -0.81 |
| IPI00219042 | Isoform 3 of Peptidyl-glycine alpha-amidating monooxygenase precursor | K.DGNYWVTDVALHQVFK.L                       | 3 | 3.05 | 0.39 | -3.20 |
| IPI00219042 | Isoform 3 of Peptidyl-glycine alpha-amidating monooxygenase precursor | K.EGPVLILGR.S                              | 2 | 1.99 | 0.05 | -0.91 |
| IPI00219042 | Isoform 3 of Peptidyl-glycine alpha-amidating monooxygenase precursor | K.ETEYKDKIPLLQPK.R                         | 2 | 4.24 | 0.38 | -4.61 |
| IPI00219042 | Isoform 3 of Peptidyl-glycine alpha-amidating monooxygenase precursor | K.FITQWGEESGSSPLPGQFTVPHSLALVPLLQQLCVADR.E | 3 | 6.02 | 0.56 | -2.67 |
| IPI00219042 | Isoform 3 of Peptidyl-glycine alpha-amidating monooxygenase precursor | K.FITQWGEESGSSPLPGQFTVPHSLALVPLLQQLCVADR.E | 4 | 4.41 | 0.36 | -2.40 |
| IPI00219042 | Isoform 3 of Peptidyl-glycine alpha-amidating monooxygenase precursor | K.FTLTEKLEHR.S                             | 2 | 3.00 | 0.31 | -4.14 |
| IPI00219042 | Isoform 3 of Peptidyl-glycine alpha-amidating monooxygenase precursor | K.FTLTEKLEHR.S                             | 3 | 2.73 | 0.27 | -4.40 |
| IPI00219042 | Isoform 3 of Peptidyl-glycine alpha-amidating monooxygenase precursor | K.FVYQQIGLPIEEDTILVIDPNNAAVLQSSGK.N        | 2 | 3.10 | 0.58 | -2.93 |
| IPI00219042 | Isoform 3 of Peptidyl-glycine alpha-amidating monooxygenase precursor | K.FVYQQIGLPIEEDTILVIDPNNAAVLQSSGK.N        | 3 | 7.50 | 0.62 | -5.69 |
| IPI00219042 | Isoform 3 of Peptidyl-glycine alpha-amidating monooxygenase precursor | K.FVYQQIGLPIEEDTILVIDPNNAAVLQSSGK.N        | 4 | 4.72 | 0.40 | -3.52 |
| IPI00219042 | Isoform 3 of Peptidyl-glycine alpha-amidating monooxygenase precursor | K.GSGGLNLGNFFASR.K                         | 2 | 4.19 | 0.40 | -2.67 |
| IPI00219042 | Isoform 3 of Peptidyl-glycine alpha-amidating monooxygenase precursor | K.HAVSFM*TCTQNVAPDM*FR.T                   | 2 | 5.15 | 0.58 | -3.91 |

|             |                                                                       |                            |   |      |      |       |
|-------------|-----------------------------------------------------------------------|----------------------------|---|------|------|-------|
| IPI00219042 | Isoform 3 of Peptidyl-glycine alpha-amidating monooxygenase precursor | K.IPLLQQPK.R               | 2 | 2.50 | 0.13 | -0.92 |
| IPI00219042 | Isoform 3 of Peptidyl-glycine alpha-amidating monooxygenase precursor | K.KAGIEVQEIK.E             | 2 | 2.77 | 0.18 | -0.24 |
| IPI00219042 | Isoform 3 of Peptidyl-glycine alpha-amidating monooxygenase precursor | K.LDPNNKEGPVLILGR.S        | 2 | 3.26 | 0.32 | -2.86 |
| IPI00219042 | Isoform 3 of Peptidyl-glycine alpha-amidating monooxygenase precursor | K.LDPNNKEGPVLILGR.S        | 3 | 4.10 | 0.41 | -1.88 |
| IPI00219042 | Isoform 3 of Peptidyl-glycine alpha-amidating monooxygenase precursor | K.LLGEREDVVHVHK.Y          | 2 | 2.76 | 0.29 | -2.89 |
| IPI00219042 | Isoform 3 of Peptidyl-glycine alpha-amidating monooxygenase precursor | K.LLGEREDVVHVHK.Y          | 3 | 3.30 | 0.38 | -2.36 |
| IPI00219042 | Isoform 3 of Peptidyl-glycine alpha-amidating monooxygenase precursor | K.NLFYLPHGLSIDK.D          | 2 | 2.86 | 0.20 | -2.77 |
| IPI00219042 | Isoform 3 of Peptidyl-glycine alpha-amidating monooxygenase precursor | K.NNLVIFHR.G               | 1 | 2.60 | 0.12 | -0.99 |
| IPI00219042 | Isoform 3 of Peptidyl-glycine alpha-amidating monooxygenase precursor | K.NNLVIFHR.G               | 2 | 2.82 | 0.17 | 0.64  |
| IPI00219042 | Isoform 3 of Peptidyl-glycine alpha-amidating monooxygenase precursor | K.NYPM*HVFAYR.V            | 2 | 2.15 | 0.16 | -0.94 |
| IPI00219042 | Isoform 3 of Peptidyl-glycine alpha-amidating monooxygenase precursor | K.QSDTYFCM*SM*R.I          | 2 | 2.86 | 0.44 | -3.09 |
| IPI00219042 | Isoform 3 of Peptidyl-glycine alpha-amidating monooxygenase precursor | K.REEEEEVLQGDYFYSLLSK.L    | 2 | 5.61 | 0.52 | -5.66 |
| IPI00219042 | Isoform 3 of Peptidyl-glycine alpha-amidating monooxygenase precursor | K.REEEEEVLQGDYFYSLLSK.L    | 3 | 5.34 | 0.38 | -4.43 |
| IPI00219042 | Isoform 3 of Peptidyl-glycine alpha-amidating monooxygenase precursor | K.TDTKEFVR.E               | 1 | 2.09 | 0.23 | -2.78 |
| IPI00219042 | Isoform 3 of Peptidyl-glycine alpha-amidating monooxygenase precursor | K.TDTKEFVR.E               | 2 | 2.18 | 0.19 | -2.34 |
| IPI00219042 | Isoform 3 of Peptidyl-glycine alpha-amidating monooxygenase precursor | K.VVSGYR.V                 | 1 | 1.17 | 0.08 | -2.62 |
| IPI00219042 | Isoform 3 of Peptidyl-glycine alpha-amidating monooxygenase precursor | K.YNPTEKAESSESLVAEIANVVQ.K | 2 | 4.87 | 0.46 | -0.06 |
| IPI00219042 | Isoform 3 of Peptidyl-glycine alpha-amidating monooxygenase precursor | L.DPNNKEGPVLILGR.S         | 3 | 3.85 | 0.35 | -0.73 |
| IPI00219042 | Isoform 3 of Peptidyl-glycine alpha-amidating monooxygenase precursor | P.QAFYPVGHPVDVSFGDLLAAR.C  | 3 | 3.88 | 0.39 | -3.12 |
| IPI00219042 | Isoform 3 of Peptidyl-glycine alpha-amidating monooxygenase precursor | R.EDVVHVHK.Y               | 2 | 2.20 | 0.27 | -2.42 |
| IPI00219042 | Isoform 3 of Peptidyl-glycine alpha-amidating monooxygenase precursor | R.EEEEEVLQGDYFYSLLSK.L     | 2 | 5.52 | 0.53 | -4.70 |



|             |                                                                       |                                           |   |      |      |       |
|-------------|-----------------------------------------------------------------------|-------------------------------------------|---|------|------|-------|
| IPI00219042 | Isoform 3 of Peptidyl-glycine alpha-amidating monooxygenase precursor | R.EEEEEVDQGDFFYSLLSK.L                    | 3 | 5.40 | 0.45 | -3.25 |
| IPI00219042 | Isoform 3 of Peptidyl-glycine alpha-amidating monooxygenase precursor | R.EGAEHERGNAILVR.D                        | 2 | 2.14 | 0.09 | -2.81 |
| IPI00219042 | Isoform 3 of Peptidyl-glycine alpha-amidating monooxygenase precursor | R.GKGSGLNGLGNFFASR.K                      | 2 | 5.47 | 0.55 | -4.07 |
| IPI00219042 | Isoform 3 of Peptidyl-glycine alpha-amidating monooxygenase precursor | R.GKGSGLNGLGNFFASR.K                      | 3 | 4.18 | 0.39 | -2.26 |
| IPI00219042 | Isoform 3 of Peptidyl-glycine alpha-amidating monooxygenase precursor | R.IPVDEEAFVIDFKPR.A                       | 2 | 4.95 | 0.56 | -6.23 |
| IPI00219042 | Isoform 3 of Peptidyl-glycine alpha-amidating monooxygenase precursor | R.IPVDEEAFVIDFKPR.A                       | 3 | 4.65 | 0.48 | -4.22 |
| IPI00219042 | Isoform 3 of Peptidyl-glycine alpha-amidating monooxygenase precursor | R.IVQFSPSGK.F                             | 1 | 2.27 | 0.17 | -3.21 |
| IPI00219042 | Isoform 3 of Peptidyl-glycine alpha-amidating monooxygenase precursor | R.IVQFSPSGK.F                             | 2 | 2.61 | 0.22 | -2.07 |
| IPI00219042 | Isoform 3 of Peptidyl-glycine alpha-amidating monooxygenase precursor | R.LSTEGSDQEKEDDGESEEEYSAPLPALAPSSS.-      | 3 | 3.29 | 0.39 | -0.99 |
| IPI00219042 | Isoform 3 of Peptidyl-glycine alpha-amidating monooxygenase precursor | R.M*PGVTPK.Q                              | 1 | 1.96 | 0.06 | -2.26 |
| IPI00219042 | Isoform 3 of Peptidyl-glycine alpha-amidating monooxygenase precursor | R.NAPPTRLPK.G                             | 2 | 2.59 | 0.14 | -2.09 |
| IPI00219042 | Isoform 3 of Peptidyl-glycine alpha-amidating monooxygenase precursor | R.NGQWTLIGR.Q                             | 1 | 2.01 | 0.11 | -2.79 |
| IPI00219042 | Isoform 3 of Peptidyl-glycine alpha-amidating monooxygenase precursor | R.NGQWTLIGR.Q                             | 2 | 3.26 | 0.29 | -0.53 |
| IPI00219042 | Isoform 3 of Peptidyl-glycine alpha-amidating monooxygenase precursor | R.QSQPLQAFYPVGHVPDVSFGDLLAAR.C            | 2 | 3.13 | 0.49 | -6.57 |
| IPI00219042 | Isoform 3 of Peptidyl-glycine alpha-amidating monooxygenase precursor | R.QSQPLQAFYPVGHVPDVSFGDLLAAR.C            | 3 | 4.67 | 0.54 | -4.57 |
| IPI00219042 | Isoform 3 of Peptidyl-glycine alpha-amidating monooxygenase precursor | R.QSQPLQAFYPVGHVPDVSFGDLLAAR.C            | 4 | 4.72 | 0.53 | -3.46 |
| IPI00219042 | Isoform 3 of Peptidyl-glycine alpha-amidating monooxygenase precursor | R.SM*QPGSDQNHFCQPTDVAVDPGTGAIYVSDGYCNSR.I | 3 | 6.06 | 0.62 | -4.42 |
| IPI00219042 | Isoform 3 of Peptidyl-glycine alpha-amidating monooxygenase precursor | R.SM*QPGSDQNHFCQPTDVAVDPGTGAIYVSDGYCNSR.I | 4 | 4.81 | 0.43 | -5.02 |
| IPI00219042 | Isoform 3 of Peptidyl-glycine alpha-amidating monooxygenase precursor | R.TEATHIGGTSSDEM*CNLYIM*YYM*EAK.H         | 3 | 4.79 | 0.45 | -3.46 |
| IPI00219042 | Isoform 3 of Peptidyl-glycine alpha-amidating monooxygenase precursor | W.PGVYLLPGQVSGVALDPK.N                    | 2 | 4.54 | 0.42 | -2.14 |
| IPI00219067 | Glutathione S-transferase Mu 2                                        | K.ITQSNAILR.Y                             | 2 | 2.69 | 0.08 | -0.96 |
| IPI00219067 | Glutathione S-transferase Mu 2                                        | K.LGLDFPNLPYLIDGTHK.I                     | 3 | 3.63 | 0.45 | -3.09 |

|             |                                               |                                          |   |      |      |       |
|-------------|-----------------------------------------------|------------------------------------------|---|------|------|-------|
| IPI00219077 | Isoform 1 of Leukotriene A-4 hydrolase        | K.DLAAFDKSHDQAVR.T                       | 3 | 2.21 | 0.15 | -1.97 |
| IPI00219129 | Ribosyldihyronicotinamide dehydrogenase       | K.NVAVDELSR.Q                            | 2 | 2.30 | 0.12 | -2.60 |
| IPI00219129 | Ribosyldihyronicotinamide dehydrogenase       | K.VLIVYAHQEPK.S                          | 3 | 2.58 | 0.23 | -3.74 |
| IPI00219129 | Ribosyldihyronicotinamide dehydrogenase       | R.VLCQGFADFIPGFYDSGLLQGK.L               | 2 | 4.48 | 0.35 | 0.23  |
| IPI00219131 | Isoform 1 of ICOS ligand precursor            | R.ALM*SPAGM*LR.G                         | 2 | 3.15 | 0.18 | -0.18 |
| IPI00219131 | Isoform 1 of ICOS ligand precursor            | R.AM*VGSDELSCACPEGSRFDLNDVYVYVWQTSESK.T  | 3 | 5.44 | 0.59 | -2.89 |
| IPI00219131 | Isoform 1 of ICOS ligand precursor            | R.DKITENPVSTGEK.N                        | 2 | 3.55 | 0.28 | -2.63 |
| IPI00219131 | Isoform 1 of ICOS ligand precursor            | R.FDLNDVYVYVWQTSESK.T                    | 2 | 5.63 | 0.58 | -4.84 |
| IPI00219131 | Isoform 1 of ICOS ligand precursor            | R.FDLNDVYVYVWQTSESK.T                    | 3 | 4.90 | 0.39 | -4.03 |
| IPI00219131 | Isoform 1 of ICOS ligand precursor            | R.GLYDVVSVLR.I                           | 1 | 2.55 | 0.29 | -2.78 |
| IPI00219131 | Isoform 1 of ICOS ligand precursor            | R.GLYDVVSVLR.I                           | 2 | 4.02 | 0.34 | -3.00 |
| IPI00219217 | L-lactate dehydrogenase B chain               | K.EKLIAPVAEEEEATVPNNK.I                  | 2 | 4.43 | 0.46 | -0.79 |
| IPI00219217 | L-lactate dehydrogenase B chain               | K.GEM*M*DLQHGSFLQTPK.I                   | 2 | 2.54 | 0.19 | -1.76 |
| IPI00219217 | L-lactate dehydrogenase B chain               | K.GM*YGIENEVFLSLPCILNAR.G                | 2 | 5.20 | 0.52 | -2.98 |
| IPI00219217 | L-lactate dehydrogenase B chain               | K.GM*YGIENEVFLSLPCILNAR.G                | 3 | 3.30 | 0.30 | -3.76 |
| IPI00219217 | L-lactate dehydrogenase B chain               | K.ITVVGVGQVGM*ACAISILGK.S                | 2 | 5.60 | 0.54 | -2.10 |
| IPI00219217 | L-lactate dehydrogenase B chain               | K.ITVVGVGQVGMACAISILGK.S                 | 2 | 3.93 | 0.45 | -2.08 |
| IPI00219217 | L-lactate dehydrogenase B chain               | K.ITVVGVGQVGMACAISILGK.S                 | 3 | 4.26 | 0.52 | -1.01 |
| IPI00219217 | L-lactate dehydrogenase B chain               | K.IVADKDYSVTANSK.I                       | 1 | 2.82 | 0.52 | -1.85 |
| IPI00219217 | L-lactate dehydrogenase B chain               | K.IVADKDYSVTANSK.I                       | 2 | 4.66 | 0.54 | -3.12 |
| IPI00219217 | L-lactate dehydrogenase B chain               | K.IVADKDYSVTANSK.I                       | 3 | 3.81 | 0.47 | -2.48 |
| IPI00219217 | L-lactate dehydrogenase B chain               | K.IVVVTAGVR.Q                            | 2 | 3.32 | 0.36 | -3.23 |
| IPI00219217 | L-lactate dehydrogenase B chain               | K.LIAPVAEEEEATVPNNK.I                    | 2 | 3.70 | 0.41 | -4.07 |
| IPI00219217 | L-lactate dehydrogenase B chain               | K.LKDDEVAQLKK.S                          | 2 | 3.92 | 0.29 | -4.78 |
| IPI00219217 | L-lactate dehydrogenase B chain               | K.LKDDEVAQLKK.S                          | 3 | 4.37 | 0.25 | -4.10 |
| IPI00219217 | L-lactate dehydrogenase B chain               | K.M*VVESAYEVIK.L                         | 2 | 3.49 | 0.30 | -3.40 |
| IPI00219217 | L-lactate dehydrogenase B chain               | K.SLADELALVDVLEDK.L                      | 2 | 4.95 | 0.40 | -4.43 |
| IPI00219217 | L-lactate dehydrogenase B chain               | K.SLADELALVDVLEDK.L                      | 3 | 3.11 | 0.23 | -2.66 |
| IPI00219217 | L-lactate dehydrogenase B chain               | K.SLADELALVDVLEDKLK.G                    | 2 | 5.28 | 0.39 | -4.21 |
| IPI00219217 | L-lactate dehydrogenase B chain               | K.SLADELALVDVLEDKLK.G                    | 3 | 2.41 | 0.21 | -2.29 |
| IPI00219217 | L-lactate dehydrogenase B chain               | K.SLADELALVDVLEDKLK.GEM*M*DLQHGSFLQTPK.I | 3 | 5.29 | 0.40 | -2.99 |
| IPI00219217 | L-lactate dehydrogenase B chain               | K.SLADELALVDVLEDKLK.GEM*M*DLQHGSFLQTPK.I | 4 | 3.90 | 0.37 | -3.55 |
| IPI00219217 | L-lactate dehydrogenase B chain               | R.NVNVFK.F                               | 1 | 1.89 | 0.13 | -1.68 |
| IPI00219217 | L-lactate dehydrogenase B chain               | R.NVNVFKFIIPQIVK.Y                       | 3 | 3.80 | 0.32 | -3.54 |
| IPI00219217 | L-lactate dehydrogenase B chain               | R.VIGSGCNLDSAR.F                         | 1 | 2.49 | 0.27 | -2.12 |
| IPI00219217 | L-lactate dehydrogenase B chain               | R.VIGSGCNLDSAR.F                         | 2 | 3.57 | 0.37 | -2.86 |
| IPI00219217 | L-lactate dehydrogenase B chain               | V.ADKDYSVTANSK.I                         | 2 | 3.28 | 0.44 | -2.13 |
| IPI00219219 | Galectin-1                                    | K.LPDGYEFK.F                             | 2 | 2.01 | 0.16 | -2.55 |
| IPI00219219 | Galectin-1                                    | R.FNAHGDANTIVCNSK.D                      | 2 | 3.53 | 0.17 |       |
| IPI00219219 | Galectin-1                                    | R.LNLEAINYMAADGDFK.I                     | 2 | 4.61 | 0.47 | -2.83 |
| IPI00219301 | Myristoylated alanine-rich C-kinase substrate | K.AEDGATPSPSNETPK.K                      | 2 | 3.01 | 0.25 | -3.91 |
| IPI00219301 | Myristoylated alanine-rich C-kinase substrate | K.GEPAAAAPEAGASPVEK.E                    | 2 | 4.11 | 0.47 | -4.06 |

|             |                                                 |                                               |   |      |      |       |
|-------------|-------------------------------------------------|-----------------------------------------------|---|------|------|-------|
| IPI00219301 | Myristoylated alanine-rich C-kinase substrate   | K.LSGFSFK.K                                   | 1 | 1.55 | 0.06 | -1.99 |
| IPI00219301 | Myristoylated alanine-rich C-kinase substrate   | K.LSGFSFK.N                                   | 2 | 2.34 | 0.10 | -3.98 |
| IPI00219365 | Moesin                                          | K.ALTSELANAR.D                                | 2 | 3.19 | 0.25 | -1.71 |
| IPI00219365 | Moesin                                          | K.APDFVIFYAPR.L                               | 2 | 2.34 | 0.35 | -2.52 |
| IPI00219365 | Moesin                                          | K.ERQEAEAKEALLQASR.D                          | 3 | 4.14 | 0.40 | -3.24 |
| IPI00219365 | Moesin                                          | K.IAQDLEM*YGVNYFSIK.N                         | 2 | 4.85 | 0.52 | -1.79 |
| IPI00219365 | Moesin                                          | K.IGFPWSEIR.N                                 | 2 | 2.60 | 0.06 | -0.69 |
| IPI00219365 | Moesin                                          | K.KTQEQLALEM*AELTAR.I                         | 2 | 4.26 | 0.47 | -2.72 |
| IPI00219365 | Moesin                                          | K.KTQEQLALEM*AELTAR.I                         | 3 | 3.40 | 0.31 | -0.38 |
| IPI00219365 | Moesin                                          | K.KVTAQDVR.K                                  | 2 | 1.94 | 0.12 | -1.45 |
| IPI00219365 | Moesin                                          | K.SGYLAGDK.L                                  | 2 | 2.26 | 0.12 | -2.68 |
| IPI00219365 | Moesin                                          | K.TANDM*IHAENM*R.L                            | 2 | 2.27 | 0.18 | -7.85 |
| IPI00219365 | Moesin                                          | K.YGDFNKEVHK.S                                | 2 | 3.34 | 0.24 | -2.37 |
| IPI00219365 | Moesin                                          | R.AKFYPEDVSEELIQDITQR.L                       | 2 | 4.25 | 0.51 | -2.75 |
| IPI00219365 | Moesin                                          | R.AKFYPEDVSEELIQDITQR.L                       | 3 | 3.64 | 0.26 | -2.87 |
| IPI00219365 | Moesin                                          | R.AQSEAEKLAK.E                                | 2 | 2.23 | 0.08 | -3.42 |
| IPI00219365 | Moesin                                          | R.EKEELM*ER.L                                 | 2 | 1.98 | 0.15 | -1.97 |
| IPI00219365 | Moesin                                          | R.GM*LREDAVLEYLK.I                            | 3 | 2.95 | 0.17 | -1.93 |
| IPI00219365 | Moesin                                          | R.ISQLEM*AR.Q                                 | 2 | 2.95 | 0.13 | -0.90 |
| IPI00219365 | Moesin                                          | R.LKQIEEQTKK.A                                | 2 | 2.99 | 0.08 | -3.46 |
| IPI00219365 | Moesin                                          | R.NISFNDKK.F                                  | 1 | 2.19 | 0.08 | -3.97 |
| IPI00219365 | Moesin                                          | R.VLEQHKLNK.D                                 | 2 | 2.18 | 0.14 | -3.56 |
| IPI00219365 | Moesin                                          | R.VTTM*DAELEFAIQPNTTGK.Q                      | 2 | 4.94 | 0.48 | -3.40 |
| IPI00219420 | Structural maintenance of chromosomes protein 3 | K.LDQDLNEVKAR.V                               | 1 | 2.85 | 0.09 | -3.10 |
| IPI00219420 | Structural maintenance of chromosomes protein 3 | R.ELKTKISAM*KEEK.E                            | 2 | 3.77 | 0.09 |       |
| IPI00219425 | Isoform Beta of Poliovirus receptor precursor   | G.DVVVQAPTQVPGFLGDSVTLPCYLQVPM*EVTHVSQLTWAR.H | 3 | 3.87 | 0.45 | -3.21 |
| IPI00219425 | Isoform Beta of Poliovirus receptor precursor   | G.DVVVQAPTQVPGFLGDSVTLPCYLQVPM*EVTHVSQLTWAR.H | 4 | 4.58 | 0.30 | -3.11 |
| IPI00219425 | Isoform Beta of Poliovirus receptor precursor   | K.VQLTGEPVPM*AR.C                             | 2 | 3.68 | 0.33 | -3.49 |
| IPI00219425 | Isoform Beta of Poliovirus receptor precursor   | R.VLAKPQNTAEVQK.V                             | 2 | 3.95 | 0.37 | -3.86 |
| IPI00219425 | Isoform Beta of Poliovirus receptor precursor   | R.VLAKPQNTAEVQK.V                             | 3 | 2.19 | 0.35 | -3.83 |
| IPI00219446 | Phosphatidylethanolamine-binding protein 1      | K.GNDISSGTVLSDYVGSPPK.G                       | 2 | 6.48 | 0.62 | -4.73 |
| IPI00219446 | Phosphatidylethanolamine-binding protein 1      | K.GNDISSGTVLSDYVGSPPK.G                       | 3 | 4.80 | 0.53 | -2.42 |
| IPI00219446 | Phosphatidylethanolamine-binding protein 1      | K.GNDISSGTVLSDYVGSPPKGTGLHR.Y                 | 2 | 3.99 | 0.48 | -3.56 |
| IPI00219446 | Phosphatidylethanolamine-binding protein 1      | K.GNDISSGTVLSDYVGSPPKGTGLHR.Y                 | 3 | 4.32 | 0.49 | -2.85 |
| IPI00219446 | Phosphatidylethanolamine-binding protein 1      | K.GNDISSGTVLSDYVGSPPKGTGLHR.Y                 | 4 | 3.18 | 0.40 | -3.27 |
| IPI00219446 | Phosphatidylethanolamine-binding protein 1      | K.LYEQLSGK.-                                  | 1 | 2.96 | 0.18 | -2.61 |
| IPI00219446 | Phosphatidylethanolamine-binding protein 1      | K.LYEQLSGK.-                                  | 2 | 2.80 | 0.21 | -2.80 |
| IPI00219446 | Phosphatidylethanolamine-binding protein 1      | K.LYTLVLTDPDAPSR.K                            | 2 | 4.37 | 0.47 | -4.27 |
| IPI00219446 | Phosphatidylethanolamine-binding protein 1      | K.LYTLVLTDPDAPSRK.D                           | 2 | 3.89 | 0.44 | -2.15 |
| IPI00219446 | Phosphatidylethanolamine-binding protein 1      | K.LYTLVLTDPDAPSRK.D                           | 3 | 3.00 | 0.32 | -1.74 |
| IPI00219446 | Phosphatidylethanolamine-binding protein 1      | K.LYTLVLTDPDAPSRKDPK.Y                        | 2 | 2.67 | 0.18 | -3.93 |
| IPI00219446 | Phosphatidylethanolamine-binding protein 1      | K.LYTLVLTDPDAPSRKDPK.Y                        | 3 | 3.31 | 0.34 | -4.05 |

|             |                                                   |                                             |   |      |      |       |
|-------------|---------------------------------------------------|---------------------------------------------|---|------|------|-------|
| IPI00219446 | Phosphatidylethanolamine-binding protein 1        | K.LYTLVLTDPDAPSRKDPK.Y                      | 4 | 2.89 | 0.18 | -2.15 |
| IPI00219446 | Phosphatidylethanolamine-binding protein 1        | K.NRPTSISWDGLDSGK.L                         | 3 | 3.33 | 0.27 | -3.15 |
| IPI00219446 | Phosphatidylethanolamine-binding protein 1        | K.VLTPTQVK.N                                | 1 | 1.66 | 0.09 | -2.66 |
| IPI00219446 | Phosphatidylethanolamine-binding protein 1        | K.WSGPLSLQEVDQEQHPLHVTYAGAAVDELGK.V         | 3 | 4.81 | 0.43 | -4.41 |
| IPI00219446 | Phosphatidylethanolamine-binding protein 1        | K.WSGPLSLQEVDQEQHPLHVTYAGAAVDELGK.V         | 4 | 3.84 | 0.25 | -0.77 |
| IPI00219446 | Phosphatidylethanolamine-binding protein 1        | P.VAGTCYQAEWDDYVPK.L                        | 2 | 4.66 | 0.47 | -4.08 |
| IPI00219446 | Phosphatidylethanolamine-binding protein 1        | R.APVAGTCYQAEWDDYVPK.L                      | 2 | 6.23 | 0.59 | -2.72 |
| IPI00219446 | Phosphatidylethanolamine-binding protein 1        | R.APVAGTCYQAEWDDYVPK.L                      | 3 | 3.13 | 0.28 | -2.48 |
| IPI00219446 | Phosphatidylethanolamine-binding protein 1        | R.YVWLVYEQDRPLK.C                           | 2 | 3.90 | 0.41 | -2.59 |
| IPI00219446 | Phosphatidylethanolamine-binding protein 1        | R.YVWLVYEQDRPLK.C                           | 3 | 2.02 | 0.15 | -2.02 |
| IPI00219446 | Phosphatidylethanolamine-binding protein 1        | R.YVWLVYEQDRPLKCDEPILSNR.S                  | 3 | 4.73 | 0.45 | -3.61 |
| IPI00219446 | Phosphatidylethanolamine-binding protein 1        | R.YVWLVYEQDRPLKCDEPILSNR.S                  | 4 | 2.36 | 0.11 | -4.61 |
| IPI00219446 | Phosphatidylethanolamine-binding protein 1        | W.SGPLSLQEVDQEQHPLHVTYAGAAVDELGK.V          | 4 | 5.07 | 0.51 | -1.62 |
| IPI00219465 | Transcobalamin-2 precursor                        | K.AQTPEGHFGNVYSTPLALQFLM*TSPM*PGAELGTACLK.A | 3 | 6.03 | 0.54 | -2.58 |
| IPI00219465 | Transcobalamin-2 precursor                        | K.AQTPEGHFGNVYSTPLALQFLM*TSPM*PGAELGTACLK.A | 4 | 3.93 | 0.36 | -2.99 |
| IPI00219465 | Transcobalamin-2 precursor                        | K.DGETIELR.L                                | 2 | 2.33 | 0.07 | -3.04 |
| IPI00219465 | Transcobalamin-2 precursor                        | K.TYIDLIFPDCLAPR.V                          | 2 | 4.10 | 0.51 | -2.03 |
| IPI00219465 | Transcobalamin-2 precursor                        | K.WFLEDEKR.A                                | 2 | 1.99 | 0.17 | -2.85 |
| IPI00219465 | Transcobalamin-2 precursor                        | R.DPNTPLLQGIADYRPK.D                        | 3 | 2.72 | 0.15 | -2.60 |
| IPI00219465 | Transcobalamin-2 precursor                        | R.LSLEHLNPSIYVGLR.L                         | 2 | 3.43 | 0.32 | -1.82 |
| IPI00219465 | Transcobalamin-2 precursor                        | R.LSLEHLNPSIYVGLR.L                         | 3 | 4.65 | 0.26 | -2.36 |
| IPI00219465 | Transcobalamin-2 precursor                        | R.LSSLQAGTKEDLYLHSLK.L                      | 2 | 4.21 | 0.50 | -3.35 |
| IPI00219465 | Transcobalamin-2 precursor                        | R.LSSLQAGTKEDLYLHSLK.L                      | 3 | 2.06 | 0.19 | -1.09 |
| IPI00219465 | Transcobalamin-2 precursor                        | R.VHDSVVDK.L                                | 2 | 2.51 | 0.22 | -2.75 |
| IPI00219468 | Isoform IIa of Profilin-2                         | K.DREGFFTNGLTLGAK.K                         | 3 | 2.95 | 0.23 | -1.85 |
| IPI00219468 | Isoform IIa of Profilin-2                         | R.VLVFVM*GK.E                               | 2 | 2.72 | 0.20 | -2.37 |
| IPI00219525 | 6-phosphogluconate dehydrogenase, decarboxylating | K.GILFVGSVSGGEEGAR.Y                        | 2 | 3.85 | 0.34 | -3.98 |
| IPI00219526 | Isoform 1 of Phosphoglucomutase-1                 | K.ADNFEYS DPV DGSISR.N                      | 2 | 5.35 | 0.51 | -4.18 |
| IPI00219526 | Isoform 1 of Phosphoglucomutase-1                 | K.DLEALM*FDR.S                              | 2 | 1.73 | 0.12 | -2.05 |
| IPI00219526 | Isoform 1 of Phosphoglucomutase-1                 | K.FFGNLM*DASK.L                             | 2 | 2.23 | 0.21 | -1.80 |
| IPI00219526 | Isoform 1 of Phosphoglucomutase-1                 | K.FNISNGGPAPEAITDKIFQISK.T                  | 3 | 2.96 | 0.12 | -2.38 |
| IPI00219526 | Isoform 1 of Phosphoglucomutase-1                 | K.IALYETPTGWK.F                             | 2 | 2.51 | 0.11 | -3.48 |
| IPI00219526 | Isoform 1 of Phosphoglucomutase-1                 | K.TIEEYAVCPDLK.V                            | 2 | 3.88 | 0.31 | -3.51 |
| IPI00219526 | Isoform 1 of Phosphoglucomutase-1                 | K.TQAYQDQKPGTSGLR.K                         | 2 | 4.42 | 0.42 | -3.22 |
| IPI00219526 | Isoform 1 of Phosphoglucomutase-1                 | K.TQAYQDQKPGTSGLR.K                         | 3 | 3.27 | 0.17 | -1.73 |
| IPI00219526 | Isoform 1 of Phosphoglucomutase-1                 | K.VFQSSANYAENFIQSIISTVEPAQR.Q               | 3 | 3.26 | 0.30 | -6.14 |
| IPI00219526 | Isoform 1 of Phosphoglucomutase-1                 | R.LIFTDGSR.I                                | 2 | 2.21 | 0.16 | -2.59 |
| IPI00219526 | Isoform 1 of Phosphoglucomutase-1                 | R.LVIGQNGILSTPAVSCIIR.K                     | 2 | 4.27 | 0.23 | -3.94 |
| IPI00219526 | Isoform 1 of Phosphoglucomutase-1                 | R.LYIDSYEKDVAK.I                            | 2 | 3.84 | 0.28 | -1.59 |
| IPI00219575 | Bleomycin hydrolase                               | K.HVPEEVLAVLEQEPHILPAWDPM*GALA.E            | 3 | 4.23 | 0.32 | -5.60 |
| IPI00219575 | Bleomycin hydrolase                               | K.IGPITPLEFYR.E                             | 2 | 3.39 | 0.39 | -4.18 |

|             |                                              |                                 |   |      |      |       |
|-------------|----------------------------------------------|---------------------------------|---|------|------|-------|
| IPI00219575 | Bleomycin hydrolase                          | K.TLYNNQPIDFLKK.M               | 2 | 2.47 | 0.18 | -2.54 |
| IPI00219622 | Proteasome subunit alpha type-2              | R.YNEDELEDAIHTAILTK.E           | 2 | 4.25 | 0.43 | -4.27 |
| IPI00219622 | Proteasome subunit alpha type-2              | R.YNEDELEDAIHTAILTK.E           | 3 | 4.05 | 0.35 | -4.93 |
| IPI00219682 | Erythrocyte band 7 integral membrane protein | K.DSVTISVDGVVYR.V               | 2 | 2.95 | 0.34 | -5.73 |
| IPI00219682 | Erythrocyte band 7 integral membrane protein | K.VIAAEGEMNASR.A                | 2 | 3.54 | 0.41 | -3.55 |
| IPI00219684 | Fatty acid-binding protein, heart            | K.LGVEFDETTADDR.K               | 2 | 3.96 | 0.55 | -4.35 |
| IPI00219684 | Fatty acid-binding protein, heart            | K.SIVTLDGGK.L                   | 2 | 2.48 | 0.18 | -3.59 |
| IPI00219684 | Fatty acid-binding protein, heart            | K.SIVTLDGGKLVHLQK.W             | 2 | 2.28 | 0.15 | -3.75 |
| IPI00219684 | Fatty acid-binding protein, heart            | R.QVASM*TKPTTIEK.N              | 2 | 2.70 | 0.13 | -3.66 |
| IPI00219757 | Glutathione S-transferase P                  | K.AFLASPEYVNLPIGNGKQ.-          | 2 | 5.07 | 0.50 | -2.80 |
| IPI00219757 | Glutathione S-transferase P                  | K.ALPGQLKPFETLLSQNGGK.T         | 2 | 4.32 | 0.51 | -3.30 |
| IPI00219757 | Glutathione S-transferase P                  | K.ALPGQLKPFETLLSQNGGK.T         | 3 | 4.43 | 0.29 | -3.59 |
| IPI00219757 | Glutathione S-transferase P                  | K.FQDGLTLYQSNTILR.H             | 2 | 5.86 | 0.55 | -3.57 |
| IPI00219757 | Glutathione S-transferase P                  | K.LKAFLASPEYVNLPIGNGKQ.-        | 3 | 4.11 | 0.29 | -1.86 |
| IPI00219757 | Glutathione S-transferase P                  | K.YISLIYTNYEAGKDDYVK.A          | 3 | 2.34 | 0.18 | -2.00 |
| IPI00219757 | Glutathione S-transferase P                  | M.PPYTVVYFPVR.G                 | 2 | 3.88 | 0.45 | -3.91 |
| IPI00219757 | Glutathione S-transferase P                  | R.MLLADQGGQSWKEEVTVETWQEGSLK.A  | 3 | 4.01 | 0.36 | -2.99 |
| IPI00219757 | Glutathione S-transferase P                  | R.TLGLYGKQDQEAALVDM*VNDGVEDLR.C | 3 | 5.61 | 0.30 | -2.64 |
| IPI00219798 | Isoform 1 of Roundabout homolog 1 precursor  | G.RRNIAEM*QVLGGYER.G            | 3 | 3.65 | 0.11 | -7.53 |
| IPI00219798 | Isoform 1 of Roundabout homolog 1 precursor  | K.AEASATLTVQEPHFVVKPR.D         | 3 | 2.25 | 0.12 | -4.60 |
| IPI00219798 | Isoform 1 of Roundabout homolog 1 precursor  | K.ARPFFNEFQGADSEIK.F            | 2 | 3.87 | 0.23 | -3.00 |
| IPI00219798 | Isoform 1 of Roundabout homolog 1 precursor  | K.ARPFFNEFQGADSEIK.F            | 3 | 3.19 | 0.20 | -3.47 |
| IPI00219798 | Isoform 1 of Roundabout homolog 1 precursor  | K.ARPFFNEFQGADSEIKFAK.T         | 2 | 4.03 | 0.36 | -1.88 |
| IPI00219798 | Isoform 1 of Roundabout homolog 1 precursor  | K.ARPFFNEFQGADSEIKFAK.T         | 3 | 5.25 | 0.33 | -0.81 |
| IPI00219798 | Isoform 1 of Roundabout homolog 1 precursor  | K.ARPFFNEFQGADSEIKFAK.T         | 4 | 4.01 | 0.27 | -1.25 |
| IPI00219798 | Isoform 1 of Roundabout homolog 1 precursor  | K.AYLEVTDVIADRPPPVIR.Q          | 2 | 3.21 | 0.35 | -4.37 |
| IPI00219798 | Isoform 1 of Roundabout homolog 1 precursor  | K.AYLEVTDVIADRPPPVIR.Q          | 3 | 4.50 | 0.48 | -3.92 |
| IPI00219798 | Isoform 1 of Roundabout homolog 1 precursor  | K.DGSPLDDKDER.I                 | 2 | 2.29 | 0.07 | -1.54 |
| IPI00219798 | Isoform 1 of Roundabout homolog 1 precursor  | K.DGVLVSTQDSR.I                 | 1 | 1.93 | 0.24 | -4.05 |
| IPI00219798 | Isoform 1 of Roundabout homolog 1 precursor  | K.DGVLVSTQDSR.I                 | 2 | 3.62 | 0.31 | -2.25 |
| IPI00219798 | Isoform 1 of Roundabout homolog 1 precursor  | K.GGERVETDKDDPR.S               | 2 | 2.20 | 0.08 | -4.48 |
| IPI00219798 | Isoform 1 of Roundabout homolog 1 precursor  | K.GLKPNAIYLFLVR.A               | 2 | 3.80 | 0.52 | -5.14 |
| IPI00219798 | Isoform 1 of Roundabout homolog 1 precursor  | K.GLKPNAIYLFLVR.A               | 3 | 4.40 | 0.41 | -2.71 |
| IPI00219798 | Isoform 1 of Roundabout homolog 1 precursor  | K.KDGSPLDDKDER.I                | 2 | 2.74 | 0.22 | -3.36 |
| IPI00219798 | Isoform 1 of Roundabout homolog 1 precursor  | K.LM*ITYTR.K                    | 2 | 2.11 | 0.09 | -2.15 |
| IPI00219798 | Isoform 1 of Roundabout homolog 1 precursor  | K.NSVVIPDLRK.G                  | 2 | 2.80 | 0.26 | -2.81 |
| IPI00219798 | Isoform 1 of Roundabout homolog 1 precursor  | K.QLENGVLQIR.Y                  | 2 | 2.80 | 0.22 | -3.43 |
| IPI00219798 | Isoform 1 of Roundabout homolog 1 precursor  | K.SEPQFIQLDAHGNPVPEDQVSLAQ.Q    | 2 | 3.59 | 0.40 | -4.87 |
| IPI00219798 | Isoform 1 of Roundabout homolog 1 precursor  | K.SRPDEGVYVCVAR.N               | 3 | 2.50 | 0.07 | -2.12 |
| IPI00219798 | Isoform 1 of Roundabout homolog 1 precursor  | K.TETSAIKGLKPNAIYLFLVR.A        | 3 | 3.30 | 0.26 | -2.06 |
| IPI00219798 | Isoform 1 of Roundabout homolog 1 precursor  | K.TETSAIKGLKPNAIYLFLVR.A        | 4 | 3.39 | 0.27 | -1.75 |
| IPI00219798 | Isoform 1 of Roundabout homolog 1 precursor  | K.TLEEAPSAPPQGVTVSK.N           | 2 | 3.31 | 0.42 | -2.99 |

|             |                                                        |                                      |   |      |      |       |
|-------------|--------------------------------------------------------|--------------------------------------|---|------|------|-------|
| IPI00219798 | Isoform 1 of Roundabout homolog 1 precursor            | K.TVDGSTFSSVIVPFLVPGIR.Y             | 2 | 4.58 | 0.51 | -6.09 |
| IPI00219798 | Isoform 1 of Roundabout homolog 1 precursor            | K.TVDGSTFSSVIVPFLVPGIR.Y             | 3 | 4.33 | 0.29 | -3.73 |
| IPI00219798 | Isoform 1 of Roundabout homolog 1 precursor            | R.AANAYGISDPSQISDPVKTDVLPVTSQGVDPK.Q | 3 | 5.28 | 0.45 | -3.54 |
| IPI00219798 | Isoform 1 of Roundabout homolog 1 precursor            | R.AANAYGISDPSQISDPVKTDVLPVTSQGVDPK.Q | 4 | 2.99 | 0.24 | -2.69 |
| IPI00219798 | Isoform 1 of Roundabout homolog 1 precursor            | R.DQVVALGR.T                         | 1 | 2.87 | 0.28 | -3.37 |
| IPI00219798 | Isoform 1 of Roundabout homolog 1 precursor            | R.EGSQNLLFSYQPPQSSSR.F               | 2 | 4.62 | 0.49 | -3.62 |
| IPI00219798 | Isoform 1 of Roundabout homolog 1 precursor            | R.ESEVAELTVLERPSFVK.R                | 2 | 3.80 | 0.47 | -2.29 |
| IPI00219798 | Isoform 1 of Roundabout homolog 1 precursor            | R.ESEVAELTVLERPSFVK.R                | 3 | 3.02 | 0.47 | -1.56 |
| IPI00219798 | Isoform 1 of Roundabout homolog 1 precursor            | R.FSVSQTGDLTITNVQR.S                 | 2 | 4.65 | 0.41 | -5.51 |
| IPI00219798 | Isoform 1 of Roundabout homolog 1 precursor            | R.IKQLENGVLQIR.Y                     | 2 | 3.33 | 0.29 | -2.43 |
| IPI00219798 | Isoform 1 of Roundabout homolog 1 precursor            | R.IKQLENGVLQIR.Y                     | 3 | 4.54 | 0.19 | -1.57 |
| IPI00219798 | Isoform 1 of Roundabout homolog 1 precursor            | R.IVEHPSDLIVSK.G                     | 2 | 3.25 | 0.38 | -2.99 |
| IPI00219798 | Isoform 1 of Roundabout homolog 1 precursor            | R.KDGLVSTQDSR.I                      | 2 | 3.89 | 0.38 | -3.83 |
| IPI00219798 | Isoform 1 of Roundabout homolog 1 precursor            | R.KDGLVSTQDSR.I                      | 3 | 2.08 | 0.17 | -3.44 |
| IPI00219798 | Isoform 1 of Roundabout homolog 1 precursor            | R.LRQEDFPPR.I                        | 2 | 1.74 | 0.08 | -5.77 |
| IPI00219798 | Isoform 1 of Roundabout homolog 1 precursor            | R.M*LLPSGSLFFLR.I                    | 2 | 3.22 | 0.24 | -3.41 |
| IPI00219798 | Isoform 1 of Roundabout homolog 1 precursor            | R.QNPSDVM*VAVGEPAVM*ECQPPR.G         | 3 | 4.70 | 0.50 | -3.85 |
| IPI00219798 | Isoform 1 of Roundabout homolog 1 precursor            | R.REGSQNLLFSYQPPQSSSR.F              | 3 | 3.68 | 0.20 | -4.19 |
| IPI00219798 | Isoform 1 of Roundabout homolog 1 precursor            | R.SDVGYIYICQLNVAGSIITK.A             | 2 | 5.90 | 0.53 | -3.84 |
| IPI00219798 | Isoform 1 of Roundabout homolog 1 precursor            | R.SDVGYIYICQLNVAGSIITK.A             | 3 | 4.34 | 0.33 | -3.61 |
| IPI00219798 | Isoform 1 of Roundabout homolog 1 precursor            | R.TVTFQCEATGNPQPAIFWR.R              | 2 | 4.44 | 0.40 | -3.68 |
| IPI00219798 | Isoform 1 of Roundabout homolog 1 precursor            | R.TVTFQCEATGNPQPAIFWR.R              | 3 | 4.57 | 0.34 | -3.57 |
| IPI00219798 | Isoform 1 of Roundabout homolog 1 precursor            | R.YSVEVAASTGAGSGVK.S                 | 2 | 4.32 | 0.45 | -4.20 |
| IPI00219806 | Protein S100-A7                                        | K.GTNYLADVFEK.K                      | 2 | 3.46 | 0.29 | -4.12 |
| IPI00219806 | Protein S100-A7                                        | K.IDFSEFLSLLGDIATDYHK.Q              | 2 | 3.17 | 0.36 | -4.69 |
| IPI00219806 | Protein S100-A7                                        | K.IDFSEFLSLLGDIATDYHK.Q              | 3 | 3.51 | 0.31 | -4.09 |
| IPI00219910 | 22 kDa protein                                         | K.YVAVM*PPHIGDQPLTGAYTVTLTDR.G       | 3 | 3.63 | 0.32 | -1.36 |
| IPI00219910 | 22 kDa protein                                         | R.LQAVTDDHIR.M                       | 2 | 2.93 | 0.25 | -2.05 |
| IPI00219910 | 22 kDa protein                                         | R.NDLSPTTVM*SEGAR.N                  | 2 | 3.99 | 0.45 | -4.90 |
| IPI00219930 | Cellular retinoic acid-binding protein 1               | K.VGEGFEEETVDGRK.C                   | 3 | 2.55 | 0.26 | 0.90  |
| IPI00219930 | Cellular retinoic acid-binding protein 1               | R.QDGDQFYIK.T                        | 2 | 1.92 | 0.22 | -3.60 |
| IPI00219930 | Cellular retinoic acid-binding protein 1               | R.SSENFDELLK.A                       | 2 | 2.68 | 0.17 | -1.72 |
| IPI00219930 | Cellular retinoic acid-binding protein 1               | R.TTEINFK.V                          | 2 | 1.51 | 0.09 | -4.83 |
| IPI00220070 | 6-phosphofructo-2-kinase/fructose-2,6-bisphosphatase 4 | R.YRYPKGESYEDLVQRLEPVIMELER.Q        | 2 | 1.31 | 0.09 | -8.04 |
| IPI00220117 | Uncharacterized protein CD99                           | D.LADGVSGGEGK.G                      | 2 | 3.18 | 0.19 | -3.10 |
| IPI00220117 | Uncharacterized protein CD99                           | F.SDADLADGVSGGEGK.G                  | 2 | 4.92 | 0.46 | -4.19 |
| IPI00220117 | Uncharacterized protein CD99                           | G.SFSDADLADGVSGGEGK.G                | 2 | 5.21 | 0.52 | -3.06 |
| IPI00220117 | Uncharacterized protein CD99                           | G.SFSDADLADGVSGGEGKGGSDGGGSHRK.E     | 3 | 4.14 | 0.50 | -2.76 |
| IPI00220117 | Uncharacterized protein CD99                           | K.EGEEADAPGVIPGIVGA.V                | 2 | 3.10 | 0.45 | -3.12 |
| IPI00220117 | Uncharacterized protein CD99                           | K.EGEEADAPGVIPGIVGAVVVA.V            | 2 | 2.98 | 0.28 | -3.72 |
| IPI00220117 | Uncharacterized protein CD99                           | K.KPSAGDDFDLGDVAVVDGEN.D             | 2 | 4.18 | 0.47 | -3.81 |

|             |                                                          |                                          |   |      |      |       |
|-------------|----------------------------------------------------------|------------------------------------------|---|------|------|-------|
| IPI00220117 | Uncharacterized protein CD99                             | K.KPSAGDDFDLGDVVDGENDDPRPPNPPKPM*PN.P    | 3 | 3.66 | 0.23 | -2.03 |
| IPI00220117 | Uncharacterized protein CD99                             | K.KPSAGDDFDLGDVVDGENDDPRPPNPPKPM*PN.P    | 4 | 5.00 | 0.41 | -2.32 |
| IPI00220117 | Uncharacterized protein CD99                             | K.KPSAGDDFDLGDVVDGENDDPRPPNPPKPM*PN.P    | 4 | 4.79 | 0.48 | -2.27 |
| IPI00220117 | Uncharacterized protein CD99                             | N.HPSSSGSFSDADLADGVSGGEGKGGSDGGGSHR.K    | 4 | 4.67 | 0.39 | -2.17 |
| IPI00220117 | Uncharacterized protein CD99                             | N.PNHPSSSGSFSDADLADGVSGGEGK.G            | 2 | 5.54 | 0.56 | -2.30 |
| IPI00220117 | Uncharacterized protein CD99                             | N.PNHPSSSGSFSDADLADGVSGGEGK.G            | 3 | 5.84 | 0.55 | -2.76 |
| IPI00220117 | Uncharacterized protein CD99                             | N.PNPNHPSGGSFSDADLADGVSGGEGK.G           | 3 | 5.71 | 0.55 | -3.05 |
| IPI00220117 | Uncharacterized protein CD99                             | N.PNPNHPSGGSFSDADLADGVSGGEGKGGSDGGGSHR.K | 5 | 4.60 | 0.31 | -5.58 |
| IPI00220117 | Uncharacterized protein CD99                             | N.PNPNHPSGGSFSDADLADGVSGGEGKGGSDGGGSHR.E | 4 | 5.48 | 0.45 | -4.37 |
| IPI00220117 | Uncharacterized protein CD99                             | P.NHPSSSGSFSDADLADGVSGGEGK.G             | 3 | 3.60 | 0.40 | -1.21 |
| IPI00220117 | Uncharacterized protein CD99                             | P.SSSGSFSDADLADGVSGGEGK.G                | 2 | 5.59 | 0.54 | -3.98 |
| IPI00220117 | Uncharacterized protein CD99                             | P.SSSGSFSDADLADGVSGGEGKGGSDGGGSHR.E      | 3 | 5.16 | 0.49 | -2.01 |
| IPI00220117 | Uncharacterized protein CD99                             | R.KEGEEADAPGVIPGIVGAVV.V                 | 2 | 2.92 | 0.19 | -2.94 |
| IPI00220117 | Uncharacterized protein CD99                             | R.KEGEEADAPGVIPGIVGAVVV.A                | 2 | 3.88 | 0.52 | -5.17 |
| IPI00220117 | Uncharacterized protein CD99                             | R.KEGEEADAPGVIPGIVGAVVVAVA.G             | 2 | 3.41 | 0.30 | -1.25 |
| IPI00220117 | Uncharacterized protein CD99                             | R.KEGEEADAPGVIPGIVGAVVVAVAGA.I           | 2 | 3.43 | 0.37 | -3.35 |
| IPI00220117 | Uncharacterized protein CD99                             | S.DADLADGVSGGEGK.G                       | 2 | 4.64 | 0.34 | -1.74 |
| IPI00220117 | Uncharacterized protein CD99                             | S.FSDADLADGVSGGEGK.G                     | 2 | 5.43 | 0.51 | -3.95 |
| IPI00220117 | Uncharacterized protein CD99                             | S.FSDADLADGVSGGEGKGGSDGGGSHR.E           | 3 | 4.22 | 0.47 | -0.82 |
| IPI00220117 | Uncharacterized protein CD99                             | S.SGSFSDADLADGVSGGEGK.G                  | 2 | 5.10 | 0.52 | -2.18 |
| IPI00220117 | Uncharacterized protein CD99                             | S.SSGSFSDADLADGVSGGEGK.G                 | 2 | 5.18 | 0.44 | -2.31 |
| IPI00220156 | Isoform B of Transforming growth factor beta-2 precursor | R.FAGIDGTSTYTSGDQK.T                     | 2 | 4.79 | 0.42 | -1.81 |
| IPI00220271 | Alcohol dehydrogenase                                    | K.GLVQALGLSNFNSR.Q                       | 2 | 2.08 | 0.14 | -3.84 |
| IPI00220281 | Guanine nucleotide-binding protein G(o) subunit alpha 1  | K.EIYCHM*TCATDTNNIQVVFDAVTDIIIANNLR.G    | 3 | 3.01 | 0.21 | -2.19 |
| IPI00220281 | Guanine nucleotide-binding protein G(o) subunit alpha 1  | K.EIYCHMTCATDTNNIQVVFDAVTDIIIANNLR.G     | 3 | 4.14 | 0.31 | -3.02 |
| IPI00220292 | Isoform 1 of Ecto-ADP-ribosyltransferase 3 precursor     | A.EVLDM*ADNAFDDEYLK.C                    | 2 | 5.53 | 0.58 | -5.03 |
| IPI00220292 | Isoform 1 of Ecto-ADP-ribosyltransferase 3 precursor     | K.AFHFYLTR.A                             | 1 | 2.13 | 0.16 | -3.45 |
| IPI00220292 | Isoform 1 of Ecto-ADP-ribosyltransferase 3 precursor     | K.AFHFYLTR.A                             | 2 | 2.47 | 0.23 | -1.82 |
| IPI00220292 | Isoform 1 of Ecto-ADP-ribosyltransferase 3 precursor     | K.M*AGQSREDYIYGFQFK.A                    | 2 | 3.28 | 0.40 | -3.30 |
| IPI00220292 | Isoform 1 of Ecto-ADP-ribosyltransferase 3 precursor     | K.M*AGQSREDYIYGFQFK.A                    | 3 | 4.00 | 0.40 | -2.11 |
| IPI00220292 | Isoform 1 of Ecto-ADP-ribosyltransferase 3 precursor     | K.TCSHYECAFLGGLK.T                       | 3 | 3.22 | 0.29 | -2.56 |
| IPI00220292 | Isoform 1 of Ecto-ADP-ribosyltransferase 3 precursor     | K.TQIFLPM*NFK.D                          | 2 | 3.01 | 0.10 | -2.54 |

|             |                                                      |                                 |   |      |      |       |
|-------------|------------------------------------------------------|---------------------------------|---|------|------|-------|
| IPI00220292 | Isoform 1 of Ecto-ADP-ribosyltransferase 3 precursor | K.YVPQLLKEEK.A                  | 2 | 2.75 | 0.17 | -3.54 |
| IPI00220292 | Isoform 1 of Ecto-ADP-ribosyltransferase 3 precursor | R.EDYIYGFQFK.A                  | 2 | 3.41 | 0.38 | -3.09 |
| IPI00220292 | Isoform 1 of Ecto-ADP-ribosyltransferase 3 precursor | R.KTQIFLPM*NFK.D                | 2 | 2.51 | 0.19 | -1.27 |
| IPI00220292 | Isoform 1 of Ecto-ADP-ribosyltransferase 3 precursor | R.TSQGTSFTFGGLNQAR.F            | 2 | 5.05 | 0.44 | -3.13 |
| IPI00220292 | Isoform 1 of Ecto-ADP-ribosyltransferase 3 precursor | R.TSQGTSFTFGGLNQAR.F            | 3 | 5.11 | 0.42 | -1.77 |
| IPI00220301 | Peroxiredoxin-6                                      | M.PGGLLLGDVAPNFEANTTVGR.I       | 3 | 4.12 | 0.39 | -5.46 |
| IPI00220301 | Peroxiredoxin-6                                      | R.DFTPVCTTELGR.A                | 2 | 3.00 | 0.27 | -3.91 |
| IPI00220301 | Peroxiredoxin-6                                      | R.NFDEILR.V                     | 2 | 2.49 | 0.07 | -2.84 |
| IPI00220327 | Keratin, type II cytoskeletal 1                      | K.DVDGAYM*TK.V                  | 2 | 2.47 | 0.30 | -2.68 |
| IPI00220327 | Keratin, type II cytoskeletal 1                      | K.KYEDEINKR.T                   | 2 | 3.00 | 0.17 | -1.46 |
| IPI00220327 | Keratin, type II cytoskeletal 1                      | K.LLEGEESR.I                    | 2 | 2.26 | 0.06 | -3.07 |
| IPI00220327 | Keratin, type II cytoskeletal 1                      | K.NKLNLDLEDALQQAKEDLAR.L        | 3 | 4.58 | 0.27 |       |
| IPI00220327 | Keratin, type II cytoskeletal 1                      | K.SLNNQFASFIDK.V                | 2 | 3.37 | 0.36 | -7.51 |
| IPI00220327 | Keratin, type II cytoskeletal 1                      | K.SLNNQFASFIDKVR.F              | 2 | 3.41 | 0.28 |       |
| IPI00220327 | Keratin, type II cytoskeletal 1                      | K.SLNNQFASFIDKVR.F              | 3 | 2.17 | 0.23 | -2.96 |
| IPI00220327 | Keratin, type II cytoskeletal 1                      | K.WELLQQVDTSTR.T                | 2 | 4.51 | 0.27 |       |
| IPI00220327 | Keratin, type II cytoskeletal 1                      | K.YEELQITAGR.H                  | 2 | 3.38 | 0.18 | -2.41 |
| IPI00220327 | Keratin, type II cytoskeletal 1                      | R.FLEQQNQVLQTK.W                | 2 | 4.27 | 0.32 | -3.17 |
| IPI00220327 | Keratin, type II cytoskeletal 1                      | R.FSSCGGGGGSFGAGGGFGR.S         | 2 | 3.74 | 0.42 |       |
| IPI00220327 | Keratin, type II cytoskeletal 1                      | R.M*SGECAPNVSVSVSTHTTISGGGSR.G  | 3 | 3.57 | 0.25 |       |
| IPI00220327 | Keratin, type II cytoskeletal 1                      | R.SLDLDSIIAEVK.A                | 2 | 4.32 | 0.40 | -2.85 |
| IPI00220327 | Keratin, type II cytoskeletal 1                      | R.THNLEPYFESFINNLR.R            | 2 | 3.45 | 0.24 |       |
| IPI00220327 | Keratin, type II cytoskeletal 1                      | R.THNLEPYFESFINNLR.R            | 3 | 4.03 | 0.38 | -4.28 |
| IPI00220334 | Isoform 3 of Seizure 6-like protein precursor        | H.ILGQYLGNSGPQK.L               | 2 | 3.14 | 0.38 | -2.17 |
| IPI00220334 | Isoform 3 of Seizure 6-like protein precursor        | K.ATSAATVQR.A                   | 2 | 2.58 | 0.13 | -3.65 |
| IPI00220334 | Isoform 3 of Seizure 6-like protein precursor        | K.IHVGEER.R                     | 2 | 2.55 | 0.13 | -2.70 |
| IPI00220334 | Isoform 3 of Seizure 6-like protein precursor        | K.LYSSTPDLTIQFHSDPAGLIFGK.G     | 2 | 5.11 | 0.57 | -2.83 |
| IPI00220334 | Isoform 3 of Seizure 6-like protein precursor        | K.LYSSTPDLTIQFHSDPAGLIFGK.G     | 3 | 2.22 | 0.11 | -2.79 |
| IPI00220334 | Isoform 3 of Seizure 6-like protein precursor        | K.SALLYDSLQTESVVPFEGLLSEGNTIR.I | 2 | 4.87 | 0.55 | -5.04 |
| IPI00220334 | Isoform 3 of Seizure 6-like protein precursor        | K.SALLYDSLQTESVVPFEGLLSEGNTIR.I | 3 | 6.00 | 0.50 | -6.45 |
| IPI00220334 | Isoform 3 of Seizure 6-like protein precursor        | K.TTSHTELVR.G                   | 1 | 2.31 | 0.20 | -3.44 |
| IPI00220334 | Isoform 3 of Seizure 6-like protein precursor        | K.TTSHTELVR.G                   | 2 | 2.61 | 0.22 | -2.01 |
| IPI00220334 | Isoform 3 of Seizure 6-like protein precursor        | L.ERDALPEGDASPLGPLYLLPSGAPER.G  | 3 | 5.02 | 0.40 | -2.86 |
| IPI00220334 | Isoform 3 of Seizure 6-like protein precursor        | R.AASTFNIR.F                    | 1 | 1.71 | 0.11 | -0.19 |
| IPI00220334 | Isoform 3 of Seizure 6-like protein precursor        | R.AASTFNIR.F                    | 2 | 2.35 | 0.16 | -1.78 |
| IPI00220334 | Isoform 3 of Seizure 6-like protein precursor        | R.DALPEGDASPLGPLYLLPSGAPER.G    | 3 | 3.64 | 0.19 | -1.96 |
| IPI00220334 | Isoform 3 of Seizure 6-like protein precursor        | R.IEFTSDQAR.A                   | 1 | 1.82 | 0.05 | -3.18 |



|             |                                                     |                                |   |      |      |       |
|-------------|-----------------------------------------------------|--------------------------------|---|------|------|-------|
| IPI00220334 | Isoform 3 of Seizure 6-like protein precursor       | R.IEFTSDQAR.A                  | 2 | 3.16 | 0.25 | -2.59 |
| IPI00220334 | Isoform 3 of Seizure 6-like protein precursor       | R.LLLHDKDR.M                   | 1 | 2.48 | 0.20 | -5.14 |
| IPI00220334 | Isoform 3 of Seizure 6-like protein precursor       | R.LLLHDKDR.M                   | 2 | 2.83 | 0.22 | -2.19 |
| IPI00220334 | Isoform 3 of Seizure 6-like protein precursor       | R.SPTNTISVYFR.T                | 1 | 2.93 | 0.35 | -3.12 |
| IPI00220334 | Isoform 3 of Seizure 6-like protein precursor       | R.SPTNTISVYFR.T                | 2 | 3.46 | 0.37 | -4.35 |
| IPI00220334 | Isoform 3 of Seizure 6-like protein precursor       | R.TFQDDGLGTFQLHYQAFM*LSCNFPR.R | 3 | 4.32 | 0.47 | -3.49 |
| IPI00220342 | N(G),N(G)-dimethylarginine dimethylaminohydrolase 1 | K.EVDM*M*KEALEK.L              | 2 | 2.33 | 0.06 | -2.18 |
| IPI00220342 | N(G),N(G)-dimethylarginine dimethylaminohydrolase 1 | K.IM*QQM*SDHRYDK.L             | 2 | 1.29 | 0.07 | -1.09 |
| IPI00220342 | N(G),N(G)-dimethylarginine dimethylaminohydrolase 1 | K.LQLNIVEM*KDENATLDGGDVLFTGR.E | 3 | 4.65 | 0.35 | -5.07 |
| IPI00220342 | N(G),N(G)-dimethylarginine dimethylaminohydrolase 1 | K.SFCSM*AGPNLIAIGSSESAQK.A     | 2 | 4.19 | 0.39 | -4.72 |
| IPI00220342 | N(G),N(G)-dimethylarginine dimethylaminohydrolase 1 | K.VDGLLTCCSVLINK.K             | 2 | 3.87 | 0.35 | -3.35 |
| IPI00220342 | N(G),N(G)-dimethylarginine dimethylaminohydrolase 1 | R.ALPESLGQHALR.S               | 2 | 2.93 | 0.37 | -3.18 |
| IPI00220342 | N(G),N(G)-dimethylarginine dimethylaminohydrolase 1 | R.EFFVGLSK.W                   | 1 | 2.13 | 0.25 | -1.89 |
| IPI00220342 | N(G),N(G)-dimethylarginine dimethylaminohydrolase 1 | R.EFFVGLSKR.T                  | 2 | 2.40 | 0.22 | -1.73 |
| IPI00220342 | N(G),N(G)-dimethylarginine dimethylaminohydrolase 1 | R.GAEILADTFKDYAVSTVPVADGLHLK.S | 3 | 4.17 | 0.33 | -2.08 |
| IPI00220342 | N(G),N(G)-dimethylarginine dimethylaminohydrolase 1 | R.GAEILADTFKDYAVSTVPVADGLHLK.S | 4 | 4.26 | 0.28 | -2.67 |
| IPI00220342 | N(G),N(G)-dimethylarginine dimethylaminohydrolase 1 | R.QHQLYVGVLSK.L                | 3 | 3.52 | 0.22 | -4.17 |
| IPI00220342 | N(G),N(G)-dimethylarginine dimethylaminohydrolase 1 | R.TPEEYPESAK.V                 | 2 | 2.62 | 0.25 | -2.49 |
| IPI00220361 | Calbindin                                           | K.IGIVELAHVLPTEENFLLFR.C       | 3 | 3.36 | 0.28 | -5.29 |
| IPI00220361 | Calbindin                                           | K.NKQDLINNITTYKK.N             | 2 | 4.74 | 0.44 | -3.71 |
| IPI00220361 | Calbindin                                           | K.NKQDLINNITTYKK.N             | 3 | 3.95 | 0.39 | -3.63 |
| IPI00220361 | Calbindin                                           | R.LLPVQENFLK.F                 | 2 | 2.56 | 0.15 | -3.11 |
| IPI00220362 | 10 kDa heat shock protein, mitochondrial            | K.GKGGEIQPVSVK.V               | 2 | 2.73 | 0.27 | 0.67  |
| IPI00220362 | 10 kDa heat shock protein, mitochondrial            | K.VLQATVVAVGSGSK.G             | 2 | 4.36 | 0.49 | -3.54 |
| IPI00220362 | 10 kDa heat shock protein, mitochondrial            | K.VVLDKDYFLFR.D                | 2 | 3.48 | 0.40 | -1.83 |
| IPI00220362 | 10 kDa heat shock protein, mitochondrial            | K.VVLDKDYFLFR.D                | 3 | 3.49 | 0.35 | -0.61 |
| IPI00220562 | Neuronal pentraxin-1 precursor                      | A.AETLSQLGQTLQSLK.T            | 2 | 4.42 | 0.35 | -3.86 |
| IPI00220562 | Neuronal pentraxin-1 precursor                      | K.ALSGNVIAWAESHIEIYGGATK.W     | 2 | 4.74 | 0.46 | -2.64 |
| IPI00220562 | Neuronal pentraxin-1 precursor                      | K.ALSGNVIAWAESHIEIYGGATK.W     | 3 | 3.01 | 0.27 | -4.70 |
| IPI00220562 | Neuronal pentraxin-1 precursor                      | K.DNRPGDKFQLTFPLR.T            | 2 | 2.45 | 0.17 | -4.00 |

|             |                                              |                                          |   |      |      |       |
|-------------|----------------------------------------------|------------------------------------------|---|------|------|-------|
| IPI00220562 | Neuronal pentraxin-1 precursor               | K.DNRPGDKFQLTFPLR.T                      | 3 | 3.34 | 0.34 | -4.61 |
| IPI00220562 | Neuronal pentraxin-1 precursor               | K.ETILSQKETIR.E                          | 2 | 3.37 | 0.31 | -2.36 |
| IPI00220562 | Neuronal pentraxin-1 precursor               | K.ETILSQKETIR.E                          | 3 | 2.44 | 0.05 | -2.09 |
| IPI00220562 | Neuronal pentraxin-1 precursor               | K.FQLTFPLR.T                             | 2 | 2.90 | 0.14 | -1.92 |
| IPI00220562 | Neuronal pentraxin-1 precursor               | K.GQKDNRPQDKFQLTFPLR.T                   | 3 | 3.94 | 0.31 | -4.72 |
| IPI00220562 | Neuronal pentraxin-1 precursor               | K.IETALTSLHQR.I                          | 2 | 3.32 | 0.32 | -3.97 |
| IPI00220562 | Neuronal pentraxin-1 precursor               | K.IETALTSLHQR.I                          | 3 | 2.45 | 0.28 | -4.24 |
| IPI00220562 | Neuronal pentraxin-1 precursor               | K.LPFVINDGK.W                            | 1 | 2.64 | 0.12 | -2.43 |
| IPI00220562 | Neuronal pentraxin-1 precursor               | K.LPFVINDGK.W                            | 2 | 2.91 | 0.19 | -1.86 |
| IPI00220562 | Neuronal pentraxin-1 precursor               | K.LTPGEVYNLATCSTK.A                      | 2 | 4.23 | 0.44 | -4.77 |
| IPI00220562 | Neuronal pentraxin-1 precursor               | K.SLPEM*YAFTVCM*WLK.S                    | 2 | 2.32 | 0.28 | -4.87 |
| IPI00220562 | Neuronal pentraxin-1 precursor               | K.TRLENLEQYSR.L                          | 2 | 3.95 | 0.29 | -3.37 |
| IPI00220562 | Neuronal pentraxin-1 precursor               | K.VAKLPFVINDGK.W                         | 2 | 2.50 | 0.11 | -3.50 |
| IPI00220562 | Neuronal pentraxin-1 precursor               | K.VAKLPFVINDGK.W                         | 3 | 3.08 | 0.17 | -3.04 |
| IPI00220562 | Neuronal pentraxin-1 precursor               | K.WTFEACR.Q                              | 2 | 1.93 | 0.06 | -1.13 |
| IPI00220562 | Neuronal pentraxin-1 precursor               | R.CESQSTLDPGAGEAR.A                      | 2 | 5.14 | 0.51 | -3.72 |
| IPI00220562 | Neuronal pentraxin-1 precursor               | R.KLTPGEVYNLATCSTK.A                     | 3 | 2.56 | 0.21 | -4.37 |
| IPI00220562 | Neuronal pentraxin-1 precursor               | R.LENLEQYSR.L                            | 1 | 2.48 | 0.15 | -3.33 |
| IPI00220562 | Neuronal pentraxin-1 precursor               | R.LENLEQYSR.L                            | 2 | 3.59 | 0.24 | -2.65 |
| IPI00220562 | Neuronal pentraxin-1 precursor               | R.TNYM*YAK.V                             | 1 | 2.12 | 0.08 | -2.16 |
| IPI00220562 | Neuronal pentraxin-1 precursor               | R.TNYM*YAK.V                             | 2 | 2.57 | 0.26 | -1.91 |
| IPI00220562 | Neuronal pentraxin-1 precursor               | R.TPAAETLSQLGQTLQSLK.T                   | 2 | 6.07 | 0.52 | -5.78 |
| IPI00220562 | Neuronal pentraxin-1 precursor               | R.TPAAETLSQLGQTLQSLK.T                   | 3 | 5.43 | 0.47 | -4.02 |
| IPI00220562 | Neuronal pentraxin-1 precursor               | R.VKIETALTSLHQR.I                        | 2 | 4.23 | 0.42 | -4.29 |
| IPI00220562 | Neuronal pentraxin-1 precursor               | R.VNTLEEGK.G                             | 2 | 2.39 | 0.09 | -2.31 |
| IPI00220562 | Neuronal pentraxin-1 precursor               | R.VNTLEEGKGGPR.N                         | 2 | 3.67 | 0.41 | -3.70 |
| IPI00220562 | Neuronal pentraxin-1 precursor               | R.VNTLEEGKGGPR.N                         | 3 | 2.03 | 0.13 | -4.23 |
| IPI00220578 | Guanine nucleotide-binding protein G         | K.IDFGEAARADDARQLFVLAGSAEEGVMTPELAGVIK.R | 3 | 3.01 | 0.08 | -8.51 |
| IPI00220642 | 14-3-3 protein gamma                         | K.AYSEAHEISK.E                           | 2 | 2.20 | 0.07 | 0.74  |
| IPI00220642 | 14-3-3 protein gamma                         | K.ELEAVCQDVLSLLDNYLIK.N                  | 2 | 4.69 | 0.50 | -2.08 |
| IPI00220642 | 14-3-3 protein gamma                         | K.ELEAVCQDVLSLLDNYLIK.N                  | 3 | 2.84 | 0.10 | -3.06 |
| IPI00220642 | 14-3-3 protein gamma                         | K.IEKELEAVCQDVLSLLDNYLIK.N               | 3 | 3.41 | 0.25 | -4.21 |
| IPI00220642 | 14-3-3 protein gamma                         | K.M*KGDYYR.Y                             | 2 | 2.25 | 0.17 | -2.86 |
| IPI00220642 | 14-3-3 protein gamma                         | K.NVTELNEPLSNEER.N                       | 2 | 2.83 | 0.37 | -2.34 |
| IPI00220642 | 14-3-3 protein gamma                         | K.TAFDDAIAELDTLNEDSYKDSTLIM*QLLR.D       | 3 | 6.36 | 0.57 | -2.58 |
| IPI00220642 | 14-3-3 protein gamma                         | R.NLLSVAYK.N                             | 1 | 1.68 | 0.08 | -2.46 |
| IPI00220642 | 14-3-3 protein gamma                         | R.NLLSVAYK.N                             | 2 | 2.28 | 0.09 | -1.47 |
| IPI00220642 | 14-3-3 protein gamma                         | R.YDDM*AAAM*K.A                          | 2 | 3.02 | 0.26 | -2.31 |
| IPI00220642 | 14-3-3 protein gamma                         | R.YLAEVATGEK.R                           | 2 | 3.00 | 0.28 | -2.68 |
| IPI00220642 | 14-3-3 protein gamma                         | R.YLAEVATGEKR.A                          | 2 | 2.58 | 0.21 | -2.42 |
| IPI00220644 | Isoform M1 of Pyruvate kinase isozymes M1/M2 | K.ASDVHEVR.K                             | 2 | 1.97 | 0.11 | -3.38 |
| IPI00220644 | Isoform M1 of Pyruvate kinase isozymes M1/M2 | K.CDENILWLDYK.N                          | 2 | 2.41 | 0.16 | -4.71 |

|             |                                              |                                         |   |      |      |       |
|-------------|----------------------------------------------|-----------------------------------------|---|------|------|-------|
| IPI00220644 | Isoform M1 of Pyruvate kinase isozymes M1/M2 | K.CLAAALIVLTESGR.S                      | 2 | 4.32 | 0.45 | -4.99 |
| IPI00220644 | Isoform M1 of Pyruvate kinase isozymes M1/M2 | K.CLAAALIVLTESGR.S                      | 3 | 3.98 | 0.37 | -2.95 |
| IPI00220644 | Isoform M1 of Pyruvate kinase isozymes M1/M2 | K.FGVEQDVDM*VFASFIR.K                   | 2 | 5.72 | 0.57 | -7.61 |
| IPI00220644 | Isoform M1 of Pyruvate kinase isozymes M1/M2 | K.FGVEQDVDM*VFASFIR.K                   | 3 | 4.92 | 0.42 | -4.92 |
| IPI00220644 | Isoform M1 of Pyruvate kinase isozymes M1/M2 | K.FGVEQDVDM*VFASFIRK.A                  | 3 | 3.47 | 0.36 | -3.36 |
| IPI00220644 | Isoform M1 of Pyruvate kinase isozymes M1/M2 | K.FGVEQDVDMVFASFIR.K                    | 2 | 5.55 | 0.59 | -5.30 |
| IPI00220644 | Isoform M1 of Pyruvate kinase isozymes M1/M2 | K.FGVEQDVDMVFASFIR.K                    | 3 | 3.76 | 0.30 | -3.77 |
| IPI00220644 | Isoform M1 of Pyruvate kinase isozymes M1/M2 | K.GADFLVTEVENGGSLGSK.K                  | 2 | 6.03 | 0.51 | -3.13 |
| IPI00220644 | Isoform M1 of Pyruvate kinase isozymes M1/M2 | K.GADFLVTEVENGGSLGSKK.G                 | 3 | 2.76 | 0.15 | -2.27 |
| IPI00220644 | Isoform M1 of Pyruvate kinase isozymes M1/M2 | K.GDYPLEAVR.M                           | 1 | 1.50 | 0.30 | -3.77 |
| IPI00220644 | Isoform M1 of Pyruvate kinase isozymes M1/M2 | K.GDYPLEAVR.M                           | 2 | 2.04 | 0.06 | -1.57 |
| IPI00220644 | Isoform M1 of Pyruvate kinase isozymes M1/M2 | K.GSGTAEVELK.K                          | 2 | 3.39 | 0.26 | -1.64 |
| IPI00220644 | Isoform M1 of Pyruvate kinase isozymes M1/M2 | K.GSGTAEVELKK.G                         | 2 | 2.95 | 0.22 | -3.24 |
| IPI00220644 | Isoform M1 of Pyruvate kinase isozymes M1/M2 | K.GVNLPGAAVDLPVSEKDIQDLK.F              | 2 | 4.80 | 0.53 | -2.87 |
| IPI00220644 | Isoform M1 of Pyruvate kinase isozymes M1/M2 | K.IENHEGVR.R                            | 2 | 3.04 | 0.11 | -2.98 |
| IPI00220644 | Isoform M1 of Pyruvate kinase isozymes M1/M2 | K.IISKIENHEGVR.R                        | 2 | 3.37 | 0.35 | -4.62 |
| IPI00220644 | Isoform M1 of Pyruvate kinase isozymes M1/M2 | K.ITLDNAYM*EK.C                         | 1 | 2.11 | 0.15 | -2.12 |
| IPI00220644 | Isoform M1 of Pyruvate kinase isozymes M1/M2 | K.ITLDNAYM*EK.C                         | 2 | 3.00 | 0.32 | -2.28 |
| IPI00220644 | Isoform M1 of Pyruvate kinase isozymes M1/M2 | K.ITLDNAYM*EKCDENILWLDYK.N              | 3 | 2.90 | 0.17 | -4.09 |
| IPI00220644 | Isoform M1 of Pyruvate kinase isozymes M1/M2 | K.IYVDDGLISLQVK.Q                       | 2 | 4.86 | 0.41 | -3.52 |
| IPI00220644 | Isoform M1 of Pyruvate kinase isozymes M1/M2 | K.KGVNLPGAAVDLPVSEK.D                   | 2 | 4.38 | 0.51 | -3.91 |
| IPI00220644 | Isoform M1 of Pyruvate kinase isozymes M1/M2 | K.KGVNLPGAAVDLPVSEK.D                   | 3 | 3.35 | 0.26 | -2.85 |
| IPI00220644 | Isoform M1 of Pyruvate kinase isozymes M1/M2 | K.KGVNLPGAAVDLPVSEKDIQDLK.F             | 2 | 5.86 | 0.60 | -5.06 |
| IPI00220644 | Isoform M1 of Pyruvate kinase isozymes M1/M2 | K.KGVNLPGAAVDLPVSEKDIQDLK.F             | 3 | 4.92 | 0.47 | -4.24 |
| IPI00220644 | Isoform M1 of Pyruvate kinase isozymes M1/M2 | K.LFEELVR.A                             | 2 | 2.85 | 0.12 | -2.21 |
| IPI00220644 | Isoform M1 of Pyruvate kinase isozymes M1/M2 | K.QKGADFLVTEVENGGSLGSK.K                | 3 | 4.27 | 0.37 | -2.87 |
| IPI00220644 | Isoform M1 of Pyruvate kinase isozymes M1/M2 | N.LPGAAVDLPVSEKDIQDLK.F                 | 3 | 3.77 | 0.50 | -1.52 |
| IPI00220644 | Isoform M1 of Pyruvate kinase isozymes M1/M2 | R.AEGSDVANAVLDGADCIM*LSGETAKGDYPLEAVR.M | 3 | 5.48 | 0.60 | -5.27 |
| IPI00220644 | Isoform M1 of Pyruvate kinase isozymes M1/M2 | R.AEGSDVANAVLDGADCIM*LSGETAKGDYPLEAVR.M | 4 | 5.30 | 0.49 | -2.77 |
| IPI00220644 | Isoform M1 of Pyruvate kinase isozymes M1/M2 | R.AEGSDVANAVLDGADCIMLSGETAK.G           | 2 | 5.40 | 0.57 | -2.91 |
| IPI00220644 | Isoform M1 of Pyruvate kinase isozymes M1/M2 | R.AEGSDVANAVLDGADCIMLSGETAK.G           | 3 | 4.21 | 0.35 | -2.37 |
| IPI00220644 | Isoform M1 of Pyruvate kinase isozymes M1/M2 | R.AGKPVICATQM*LESMS*IK.K                | 2 | 3.73 | 0.50 | -3.04 |
| IPI00220644 | Isoform M1 of Pyruvate kinase isozymes M1/M2 | R.AGKPVICATQM*LESMS*IK.K                | 3 | 3.42 | 0.27 | -1.80 |
| IPI00220644 | Isoform M1 of Pyruvate kinase isozymes M1/M2 | R.APIIAVTR.N                            | 1 | 2.18 | 0.26 | -3.67 |
| IPI00220644 | Isoform M1 of Pyruvate kinase isozymes M1/M2 | R.APIIAVTR.N                            | 2 | 2.92 | 0.31 | -4.09 |
| IPI00220644 | Isoform M1 of Pyruvate kinase isozymes M1/M2 | R.EAEAAM*FHR.K                          | 2 | 2.75 | 0.19 | -2.76 |
| IPI00220644 | Isoform M1 of Pyruvate kinase isozymes M1/M2 | R.FDEILEASDGIM*VAR.G                    | 2 | 4.43 | 0.53 | -4.49 |
| IPI00220644 | Isoform M1 of Pyruvate kinase isozymes M1/M2 | R.GDLGIEIPAOK.V                         | 2 | 3.68 | 0.23 | -2.46 |
| IPI00220644 | Isoform M1 of Pyruvate kinase isozymes M1/M2 | R.GIFPVLCCKDPVQEAWAEDVDLR.V             | 2 | 5.44 | 0.55 | -3.29 |
| IPI00220644 | Isoform M1 of Pyruvate kinase isozymes M1/M2 | R.GIFPVLCCKDPVQEAWAEDVDLR.V             | 3 | 5.87 | 0.46 | -3.71 |
| IPI00220644 | Isoform M1 of Pyruvate kinase isozymes M1/M2 | R.LDIDSPITAR.N                          | 1 | 1.91 | 0.32 | -3.27 |
| IPI00220644 | Isoform M1 of Pyruvate kinase isozymes M1/M2 | R.LDIDSPITAR.N                          | 2 | 3.93 | 0.34 | -3.34 |

|             |                                                       |                                  |   |      |      |       |
|-------------|-------------------------------------------------------|----------------------------------|---|------|------|-------|
| IPI00220644 | Isoform M1 of Pyruvate kinase isozymes M1/M2          | R.LNFSGHTHEYHAETIK.N             | 2 | 4.53 | 0.48 | -5.84 |
| IPI00220644 | Isoform M1 of Pyruvate kinase isozymes M1/M2          | R.LNFSGHTHEYHAETIK.N             | 3 | 3.79 | 0.38 | -3.39 |
| IPI00220644 | Isoform M1 of Pyruvate kinase isozymes M1/M2          | R.LNFSGHTHEYHAETIK.N             | 4 | 2.97 | 0.34 | -3.20 |
| IPI00220644 | Isoform M1 of Pyruvate kinase isozymes M1/M2          | R.NTGIICTIGPASR.S                | 1 | 3.05 | 0.41 | -2.10 |
| IPI00220644 | Isoform M1 of Pyruvate kinase isozymes M1/M2          | R.NTGIICTIGPASR.S                | 2 | 4.66 | 0.44 | -2.25 |
| IPI00220644 | Isoform M1 of Pyruvate kinase isozymes M1/M2          | R.RFDEILEASDGIM*VAR.G            | 2 | 3.07 | 0.15 | -2.80 |
| IPI00220644 | Isoform M1 of Pyruvate kinase isozymes M1/M2          | R.RFDEILEASDGIM*VAR.G            | 3 | 4.87 | 0.34 | -2.15 |
| IPI00220644 | Isoform M1 of Pyruvate kinase isozymes M1/M2          | R.RFDEILEASDGIMVAR.G             | 2 | 3.47 | 0.35 | -3.56 |
| IPI00220644 | Isoform M1 of Pyruvate kinase isozymes M1/M2          | R.RFDEILEASDGIMVAR.G             | 3 | 3.94 | 0.29 | -3.12 |
| IPI00220644 | Isoform M1 of Pyruvate kinase isozymes M1/M2          | R.SVETLKEM*IK.S                  | 2 | 2.31 | 0.25 | -1.93 |
| IPI00220644 | Isoform M1 of Pyruvate kinase isozymes M1/M2          | R.TATESFASDPILYRPVAVALDTK.G      | 2 | 4.63 | 0.56 | -4.63 |
| IPI00220644 | Isoform M1 of Pyruvate kinase isozymes M1/M2          | R.TATESFASDPILYRPVAVALDTK.G      | 3 | 3.29 | 0.35 | -4.68 |
| IPI00220644 | Isoform M1 of Pyruvate kinase isozymes M1/M2          | R.TATESFASDPILYRPVAVALDTKGPE.I   | 3 | 5.32 | 0.55 | -1.60 |
| IPI00220644 | Isoform M1 of Pyruvate kinase isozymes M1/M2          | R.TATESFASDPILYRPVAVALDTKGPEI.R  | 3 | 5.90 | 0.64 | -4.97 |
| IPI00220644 | Isoform M1 of Pyruvate kinase isozymes M1/M2          | R.TATESFASDPILYRPVAVALDTKGPEIR.T | 3 | 6.47 | 0.62 | -5.03 |
| IPI00220644 | Isoform M1 of Pyruvate kinase isozymes M1/M2          | R.TATESFASDPILYRPVAVALDTKGPEIR.T | 4 | 4.39 | 0.41 | -3.78 |
| IPI00220644 | Isoform M1 of Pyruvate kinase isozymes M1/M2          | R.VNFAM*NVGK.A                   | 1 | 2.68 | 0.27 | -3.16 |
| IPI00220644 | Isoform M1 of Pyruvate kinase isozymes M1/M2          | R.VNFAM*NVGK.A                   | 2 | 3.09 | 0.34 | -1.97 |
| IPI00220706 | Hemoglobin subunit gamma-1                            | R.FFDSFGNLSSASAIM*GNPK.V         | 2 | 5.02 | 0.53 |       |
| IPI00220706 | Hemoglobin subunit gamma-1                            | R.LLVVYPWTQR.F                   | 2 | 3.24 | 0.30 | -6.61 |
| IPI00220739 | Membrane-associated progesterone receptor component 1 | G.DQPAASGSDDDDEPPPLPR.L          | 2 | 4.30 | 0.61 | -2.36 |
| IPI00220739 | Membrane-associated progesterone receptor component 1 | G.DQPAASGSDDDDEPPPLPR.L          | 3 | 4.27 | 0.38 | -2.28 |
| IPI00220739 | Membrane-associated progesterone receptor component 1 | K.EGEEPTVYSDEEEKPKDESAR.K        | 3 | 2.96 | 0.43 | -2.98 |
| IPI00220739 | Membrane-associated progesterone receptor component 1 | K.FYGPEGPYGVFAGR.D               | 2 | 4.43 | 0.55 | -4.51 |
| IPI00220739 | Membrane-associated progesterone receptor component 1 | K.LLKEGEEPTVYSDEEEKPKDESAR.K     | 3 | 5.60 | 0.58 | -1.69 |
| IPI00220739 | Membrane-associated progesterone receptor component 1 | K.LLKEGEEPTVYSDEEEKPKDESAR.K     | 4 | 3.35 | 0.26 | -2.37 |
| IPI00220739 | Membrane-associated progesterone receptor component 1 | R.FDGVQDPR.I                     | 2 | 2.14 | 0.05 | -2.68 |
| IPI00220739 | Membrane-associated progesterone receptor component 1 | R.GDQPAASGSDDDDEPPPLPR.L         | 2 | 3.87 | 0.51 | -2.91 |
| IPI00220739 | Membrane-associated progesterone receptor component 1 | R.ILM*AINGK.V                    | 2 | 2.29 | 0.07 | -2.40 |
| IPI00220739 | Membrane-associated progesterone receptor component 1 | R.KFYGPEGPYGVFAGR.D              | 2 | 4.04 | 0.50 | -2.56 |
| IPI00220739 | Membrane-associated progesterone receptor component 1 | R.KFYGPEGPYGVFAGR.D              | 3 | 4.01 | 0.42 | -1.47 |

|             |                                 |                                           |   |      |      |       |
|-------------|---------------------------------|-------------------------------------------|---|------|------|-------|
| IPI00220741 | spectrin, alpha, erythrocytic 1 | K.ALGVPSSPYTWLTVEVLER.T                   | 2 | 3.84 | 0.38 | -4.21 |
| IPI00220741 | spectrin, alpha, erythrocytic 1 | K.DLNTLAEDLLSSGTFNVDQIVK.K                | 2 | 5.31 | 0.54 | -3.17 |
| IPI00220741 | spectrin, alpha, erythrocytic 1 | K.EAIATSVELGEDWER.T                       | 2 | 2.51 | 0.33 | -2.47 |
| IPI00220741 | spectrin, alpha, erythrocytic 1 | K.EAYALFQFFQDLDDDEESWIEEK.L               | 2 | 6.28 | 0.55 | -4.91 |
| IPI00220741 | spectrin, alpha, erythrocytic 1 | K.EAYALFQFFQDLDDDEESWIEEK.L               | 3 | 5.64 | 0.48 | -4.54 |
| IPI00220741 | spectrin, alpha, erythrocytic 1 | K.FQQYVQECADILEWIGDK.E                    | 2 | 5.90 | 0.59 | -5.03 |
| IPI00220741 | spectrin, alpha, erythrocytic 1 | K.FQQYVQECADILEWIGDK.E                    | 3 | 3.28 | 0.34 | -6.31 |
| IPI00220741 | spectrin, alpha, erythrocytic 1 | K.FQQYVQECADILEWIGDK.EAIATSVELGEDWER.T    | 3 | 7.26 | 0.56 | -5.60 |
| IPI00220741 | spectrin, alpha, erythrocytic 1 | K.FQQYVQECADILEWIGDK.EAIATSVELGEDWER.T    | 4 | 3.84 | 0.32 | -3.23 |
| IPI00220741 | spectrin, alpha, erythrocytic 1 | K.GYVSLEDYTAFLIDK.E                       | 2 | 5.43 | 0.45 | -6.15 |
| IPI00220741 | spectrin, alpha, erythrocytic 1 | K.GYVSLEDYTAFLIDKESENIK.S                 | 3 | 1.83 | 0.13 | -3.58 |
| IPI00220741 | spectrin, alpha, erythrocytic 1 | K.GYVSLEDYTAFLIDKESENIKSSDEIENAFQALAEKG.S | 4 | 4.82 | 0.37 | -4.35 |
| IPI00220741 | spectrin, alpha, erythrocytic 1 | K.HEALENDFAVHETR.V                        | 3 | 4.48 | 0.41 | -3.32 |
| IPI00220741 | spectrin, alpha, erythrocytic 1 | K.HEDFEEAFTAQEEK.I                        | 2 | 4.64 | 0.49 | -1.77 |
| IPI00220741 | spectrin, alpha, erythrocytic 1 | K.HEDFEEAFTAQEEK.I                        | 3 | 2.22 | 0.24 | -3.65 |
| IPI00220741 | spectrin, alpha, erythrocytic 1 | K.ILDQCLELQMFQGNCDQVESWMMVAR.E            | 2 | 5.34 | 0.52 | -3.34 |
| IPI00220741 | spectrin, alpha, erythrocytic 1 | K.ILDQCLELQMFQGNCDQVESWMMVAR.E            | 3 | 5.38 | 0.60 | -6.33 |
| IPI00220741 | spectrin, alpha, erythrocytic 1 | K.IVDLGDNLLEDALILDIK.Y                    | 2 | 5.60 | 0.49 | -6.17 |
| IPI00220741 | spectrin, alpha, erythrocytic 1 | K.IVDLGDNLLEDALILDIK.Y                    | 3 | 5.28 | 0.42 | -3.39 |
| IPI00220741 | spectrin, alpha, erythrocytic 1 | K.KAENTGVELDDVWELQK.K                     | 3 | 3.36 | 0.23 | -4.90 |
| IPI00220741 | spectrin, alpha, erythrocytic 1 | K.KFEDFQVELVAK.E                          | 3 | 3.10 | 0.21 | -2.40 |
| IPI00220741 | spectrin, alpha, erythrocytic 1 | K.LEESLEYLQFMQNAEEEEAWINEK.N              | 2 | 6.03 | 0.57 | -4.81 |
| IPI00220741 | spectrin, alpha, erythrocytic 1 | K.LEESLEYLQFMQNAEEEEAWINEK.N              | 3 | 6.42 | 0.55 | -5.52 |
| IPI00220741 | spectrin, alpha, erythrocytic 1 | K.LKEAYALFQFFQDLDDDEESWIEEK.L             | 3 | 3.45 | 0.37 | -4.10 |
| IPI00220741 | spectrin, alpha, erythrocytic 1 | K.M*EILDNNWTALLELWDER.H                   | 2 | 4.54 | 0.34 | -4.67 |
| IPI00220741 | spectrin, alpha, erythrocytic 1 | K.MEILDNNWTALLELWDER.H                    | 2 | 6.10 | 0.46 | -4.58 |
| IPI00220741 | spectrin, alpha, erythrocytic 1 | K.MEILDNNWTALLELWDER.H                    | 3 | 4.88 | 0.25 | -5.06 |
| IPI00220741 | spectrin, alpha, erythrocytic 1 | K.MVEEGHFAAEDVASR.V                       | 2 | 4.51 | 0.47 | -3.51 |
| IPI00220741 | spectrin, alpha, erythrocytic 1 | K.MVEEGHFAAEDVASR.V                       | 3 | 3.87 | 0.41 | -2.81 |
| IPI00220741 | spectrin, alpha, erythrocytic 1 | K.NFEM*CFEFEQNASTFLQWILETR.A              | 3 | 4.92 | 0.39 | -4.59 |
| IPI00220741 | spectrin, alpha, erythrocytic 1 | K.NFEMCQEFEQNASTFLQWILETR.A               | 2 | 5.49 | 0.58 | -6.25 |
| IPI00220741 | spectrin, alpha, erythrocytic 1 | K.NFEMCQEFEQNASTFLQWILETR.A               | 3 | 6.29 | 0.54 | -5.23 |
| IPI00220741 | spectrin, alpha, erythrocytic 1 | K.NFEMCQEFEQNASTFLQWILETR.A               | 4 | 3.31 | 0.21 | -3.42 |
| IPI00220741 | spectrin, alpha, erythrocytic 1 | K.TGQEMIEGGHYASDNVTTR.L                   | 3 | 3.10 | 0.44 | -3.82 |
| IPI00220741 | spectrin, alpha, erythrocytic 1 | K.YSTIGLAQQWDQLYQLGLR.M                   | 2 | 5.32 | 0.54 | -5.48 |
| IPI00220741 | spectrin, alpha, erythrocytic 1 | K.YSTIGLAQQWDQLYQLGLR.M                   | 3 | 4.77 | 0.50 | -3.85 |
| IPI00220741 | spectrin, alpha, erythrocytic 1 | N.WISSIGMVSSQELAEDLTGIEILLER.H            | 3 | 4.13 | 0.31 | -4.20 |
| IPI00220741 | spectrin, alpha, erythrocytic 1 | R.DFEFWLSEAETLLAMK.D                      | 2 | 5.85 | 0.52 | -6.16 |
| IPI00220741 | spectrin, alpha, erythrocytic 1 | R.DFEFWLSEAETLLAMK.D                      | 3 | 6.81 | 0.50 | -3.60 |
| IPI00220741 | spectrin, alpha, erythrocytic 1 | R.DLQNWISSIGGM*VSSQELAEDLTGIEILLER.H      | 3 | 6.68 | 0.52 | -5.44 |
| IPI00220741 | spectrin, alpha, erythrocytic 1 | R.EKMEILDNNWTALLELWDER.H                  | 3 | 4.02 | 0.28 | -5.45 |
| IPI00220741 | spectrin, alpha, erythrocytic 1 | R.FNTSIRDFEFWLSEAETLLAMKQDAR.D            | 3 | 2.96 | 0.37 | -3.19 |

|             |                                                            |                                            |   |      |      |       |
|-------------|------------------------------------------------------------|--------------------------------------------|---|------|------|-------|
| IPI00220741 | spectrin, alpha, erythrocytic 1                            | R.FNTSIRDFFFWLSEAEITLLAMKDQAR.D            | 4 | 3.89 | 0.34 | -4.19 |
| IPI00220741 | spectrin, alpha, erythrocytic 1                            | R.GDCGDTLAATQSLLMK.H                       | 2 | 4.78 | 0.45 | -2.59 |
| IPI00220741 | spectrin, alpha, erythrocytic 1                            | R.HLWDLLELTLEK.G                           | 2 | 5.25 | 0.56 | -5.25 |
| IPI00220741 | spectrin, alpha, erythrocytic 1                            | R.HLWDLLELTLEK.G                           | 3 | 4.86 | 0.32 | -3.75 |
| IPI00220741 | spectrin, alpha, erythrocytic 1                            | R.KGYVSLEDYTAFLIDK.E                       | 2 | 4.62 | 0.43 | -3.94 |
| IPI00220741 | spectrin, alpha, erythrocytic 1                            | R.KGYVSLEDYTAFLIDK.E                       | 3 | 4.41 | 0.33 | -5.06 |
| IPI00220741 | spectrin, alpha, erythrocytic 1                            | R.KGYVSLEDYTAFLIDKESENIK.S                 | 3 | 5.01 | 0.40 | -4.70 |
| IPI00220741 | spectrin, alpha, erythrocytic 1                            | R.KGYVSLEDYTAFLIDKESENIKSSDEIENAFQALAEKG.S | 4 | 4.18 | 0.31 | -3.33 |
| IPI00220741 | spectrin, alpha, erythrocytic 1                            | R.LSEVASLWEELEATK.Q                        | 2 | 3.69 | 0.32 | -2.22 |
| IPI00220741 | spectrin, alpha, erythrocytic 1                            | R.QDQVDILTDLAAYFEEIGHPSDK.D                | 3 | 4.76 | 0.44 | -4.65 |
| IPI00220741 | spectrin, alpha, erythrocytic 1                            | R.QNDLEANVQFQQYLADLHEAETWIR.E              | 3 | 4.48 | 0.48 | -6.73 |
| IPI00220741 | spectrin, alpha, erythrocytic 1                            | R.QYEQCLDFHLFYR.D                          | 3 | 1.70 | 0.14 | -3.37 |
| IPI00220741 | spectrin, alpha, erythrocytic 1                            | R.RQNDLEANVQFQQYLADLHEAETWIR.E             | 3 | 5.50 | 0.59 | -2.82 |
| IPI00220741 | spectrin, alpha, erythrocytic 1                            | R.RQNDLEANVQFQQYLADLHEAETWIR.E             | 4 | 3.24 | 0.05 | -3.33 |
| IPI00220741 | spectrin, alpha, erythrocytic 1                            | R.SHLSGYDYVGFNTSYFGN.-                     | 2 | 4.81 | 0.54 | -4.72 |
| IPI00220741 | spectrin, alpha, erythrocytic 1                            | R.YNEFLLAYEAGDM*LEWIQEK.K                  | 2 | 4.74 | 0.52 | -5.01 |
| IPI00220741 | spectrin, alpha, erythrocytic 1                            | R.YNEFLLAYEAGDM*LEWIQEK.K                  | 3 | 2.61 | 0.11 | 1.78  |
| IPI00220741 | spectrin, alpha, erythrocytic 1                            | R.YNEFLLAYEAGDMLEWIQEK.K                   | 2 | 6.57 | 0.60 | -5.72 |
| IPI00220741 | spectrin, alpha, erythrocytic 1                            | R.YNEFLLAYEAGDMLEWIQEK.K                   | 3 | 5.92 | 0.51 | -4.87 |
| IPI00220741 | spectrin, alpha, erythrocytic 1                            | S.SIGGMVSSQELAEDLTGIEILLER.H               | 2 | 5.36 | 0.54 | -3.92 |
| IPI00220741 | spectrin, alpha, erythrocytic 1                            | S.SIGGMVSSQELAEDLTGIEILLER.H               | 3 | 5.01 | 0.38 | -4.62 |
| IPI00220741 | spectrin, alpha, erythrocytic 1                            | W.ISSIGGMVSSQELAEDLTGIEILLER.H             | 3 | 3.79 | 0.30 | -3.54 |
| IPI00220741 | spectrin, alpha, erythrocytic 1                            | Y.ALQFFQDLDEESWIEEK.L                      | 2 | 5.80 | 0.54 | -4.74 |
| IPI00220741 | spectrin, alpha, erythrocytic 1                            | Y.ALQFFQDLDEESWIEEK.L                      | 3 | 4.93 | 0.46 | -3.62 |
| IPI00220748 | Isoform Alpha-7X1A of Integrin alpha-7 precursor           | R.ELEPPEQQEPGER.Q                          | 2 | 2.32 | 0.19 | -4.55 |
| IPI00220748 | Isoform Alpha-7X1A of Integrin alpha-7 precursor           | R.ELEPPEQQEPGERQEPS.M                      | 2 | 3.00 | 0.29 | -4.53 |
| IPI00220766 | Lactoylglutathione lyase                                   | K.GLAFIQDPDGYWIEILNPNK.M                   | 2 | 6.08 | 0.52 | -5.23 |
| IPI00220766 | Lactoylglutathione lyase                                   | K.SLDFYTR.V                                | 2 | 2.54 | 0.21 | -1.28 |
| IPI00220766 | Lactoylglutathione lyase                                   | R.VLGM*TLIQK.C                             | 2 | 2.42 | 0.05 | -2.35 |
| IPI00220791 | Amphiphysin I variant CT2                                  | K.IGTETTEGAESAQPEAELEATVPQEK.V             | 3 | 3.44 | 0.34 | -2.86 |
| IPI00220827 | Thymosin beta-10                                           | K.NTLPTKETIEQE.K                           | 2 | 3.13 | 0.28 | -1.70 |
| IPI00220827 | Thymosin beta-10                                           | K.NTLPTKETIEQE.K.R                         | 2 | 3.68 | 0.15 | -2.09 |
| IPI00220827 | Thymosin beta-10                                           | K.NTLPTKETIEQE.K.S                         | 2 | 3.63 | 0.32 | -4.82 |
| IPI00220827 | Thymosin beta-10                                           | K.NTLPTKETIEQE.K.S                         | 3 | 3.21 | 0.39 | -3.13 |
| IPI00220827 | Thymosin beta-10                                           | K.NTLPTKETIEQE.K.S                         | 4 | 2.36 | 0.14 | -3.78 |
| IPI00220827 | Thymosin beta-10                                           | K.TETQEKNLPTK.E                            | 2 | 3.23 | 0.12 | -2.69 |
| IPI00220827 | Thymosin beta-10                                           | K.TETQEKNLPTKETIEQE.K.S                    | 3 | 4.93 | 0.41 | -4.57 |
| IPI00220827 | Thymosin beta-10                                           | K.TETQEKNLPTKETIEQE.K.S                    | 4 | 3.15 | 0.29 | -3.59 |
| IPI00221006 | Isoform 4 of Transcription factor 7-like 2                 | R.KRDKQPGETNDLSAPK.K                       | 2 | 2.51 | 0.06 | 2.52  |
| IPI00221034 | Transcription factor RelB                                  | K.RGM*PDVLGELNSSDPHGIESKRRKK.K             | 3 | 4.00 | 0.11 |       |
| IPI00221080 | Isoform 2 of Parathyroid hormone-related protein precursor | R.ATSEVSPNSKPSNTK.N                        | 2 | 3.92 | 0.43 | -3.54 |

|             |                                                       |                                            |   |      |      |       |
|-------------|-------------------------------------------------------|--------------------------------------------|---|------|------|-------|
| IPI00221117 | Acylphosphatase-1                                     | K.VQGVFFR.K                                | 2 | 2.00 | 0.21 | -1.44 |
| IPI00221117 | Acylphosphatase-1                                     | R.GTVQGGQLQGPISK.V                         | 2 | 2.27 | 0.21 | -2.78 |
| IPI00221178 | Isoform 2 of Tumor protein D54                        | R.TPAVEGLTEAEIEEEELRAELTKVEEIVTLR.Q        | 4 | 4.95 | 0.46 | -3.02 |
| IPI00221224 | Aminopeptidase N                                      | K.DLM*VLNDVYR.V                            | 2 | 3.34 | 0.38 | -3.21 |
| IPI00221224 | Aminopeptidase N                                      | K.DLTALSNM*LPK.G                           | 2 | 3.55 | 0.40 | -4.34 |
| IPI00221224 | Aminopeptidase N                                      | K.DNEETGFGSGTR.A                           | 2 | 3.47 | 0.46 | -0.32 |
| IPI00221224 | Aminopeptidase N                                      | K.EVVLQWFTENSK.-                           | 2 | 4.44 | 0.41 | -3.75 |
| IPI00221224 | Aminopeptidase N                                      | K.LFNDYGGGSFSSNLIQAVTR.R                   | 2 | 4.76 | 0.47 | -2.71 |
| IPI00221224 | Aminopeptidase N                                      | K.VVATTQM*QAADAR.K                         | 2 | 4.26 | 0.46 | -2.79 |
| IPI00221224 | Aminopeptidase N                                      | N.PASATTLQSK.A                             | 2 | 3.71 | 0.34 | 0.00  |
| IPI00221224 | Aminopeptidase N                                      | R.GVGGSQPPDIDKTELVEPTEYLVVHLK.G            | 3 | 4.44 | 0.39 | -4.00 |
| IPI00221224 | Aminopeptidase N                                      | R.GVGGSQPPDIDKTELVEPTEYLVVHLK.G            | 4 | 3.22 | 0.32 | -3.19 |
| IPI00221224 | Aminopeptidase N                                      | R.KVVATTQM*QAADAR.K                        | 2 | 4.36 | 0.52 | -3.66 |
| IPI00221224 | Aminopeptidase N                                      | R.M*LSSFLSEDFK.Q                           | 2 | 4.13 | 0.40 | -4.53 |
| IPI00221224 | Aminopeptidase N                                      | R.QYM*PWEAALSLSYFK.L                       | 2 | 4.23 | 0.51 | -4.80 |
| IPI00221224 | Aminopeptidase N                                      | R.RFSTEYELQQLEQFKK.D                       | 3 | 5.02 | 0.33 | -3.70 |
| IPI00221224 | Aminopeptidase N                                      | R.SEYM*EGNVR.K                             | 2 | 3.31 | 0.31 | -1.40 |
| IPI00221224 | Aminopeptidase N                                      | R.VM*AVDALASSHPLSTPASEINTPAQISELFDAYSYSK.G | 3 | 7.45 | 0.58 | -2.24 |
| IPI00221224 | Aminopeptidase N                                      | R.VM*AVDALASSHPLSTPASEINTPAQISELFDAYSYSK.G | 4 | 4.20 | 0.52 | -2.47 |
| IPI00221224 | Aminopeptidase N                                      | R.VTLRPYLTPNDR.G                           | 3 | 2.56 | 0.11 | -2.17 |
| IPI00221235 | nucleoporin 160kDa                                    | K.M*AAAGALER.S                             | 1 | 1.17 | 0.12 | -3.54 |
| IPI00221255 | Isoform 2 of Myosin light chain kinase, smooth muscle | R.DLEVVEGSAAR.F                            | 2 | 3.35 | 0.37 | -3.12 |
| IPI00221332 | Uncharacterized protein DNM3                          | K.ALLQMVQQFAVDFEK.R                        | 2 | 4.83 | 0.49 | 1.93  |
| IPI00233358 | islet cell autoantigen 1,69kDa-like isoform 2         | K.IIEKYQLRLNGM*KS.-                        | 1 | 2.16 | 0.07 |       |
| IPI00235647 | similar to fibrillarin                                | R.DLVNVAK.K                                | 1 | 1.88 | 0.11 | -2.97 |
| IPI00240793 | Probable phospholipid-transporting ATPase IF          | K.ISPEKPITLAVGDGANDVSMIQEAHVGIGIMGKEGR.Q   | 3 | 3.37 | 0.11 | -0.36 |
| IPI00241409 | hypothetical protein LOC55747                         | K.VSNIFDDPLNAFGGQ.-                        | 3 | 1.61 | 0.17 | -0.45 |
| IPI00241562 | reelin isoform a                                      | K.CGILSSGNLFFNEDGLR.M                      | 2 | 5.25 | 0.49 | -4.94 |
| IPI00241562 | reelin isoform a                                      | K.CGILSSGNLFFNEDGLR.M                      | 3 | 3.66 | 0.19 | -0.92 |
| IPI00241562 | reelin isoform a                                      | K.CSGSVSQPSVFFPTK.G                        | 2 | 4.14 | 0.42 | -2.86 |
| IPI00241562 | reelin isoform a                                      | K.DFTQAQR.V                                | 1 | 1.75 | 0.20 | -3.24 |
| IPI00241562 | reelin isoform a                                      | K.DFTQAQR.V                                | 2 | 2.10 | 0.21 | -3.00 |
| IPI00241562 | reelin isoform a                                      | K.DNFESAR.V                                | 2 | 1.82 | 0.06 | -3.42 |
| IPI00241562 | reelin isoform a                                      | K.EGVLLDYSTDGGITWLLHEM*DYQK.Y              | 3 | 3.23 | 0.32 | -1.65 |
| IPI00241562 | reelin isoform a                                      | K.FLQYWGR.I                                | 2 | 2.25 | 0.17 | -1.18 |
| IPI00241562 | reelin isoform a                                      | K.GAPEEDSAM*VFVSNEVGEHSITR.D               | 3 | 2.97 | 0.17 | -3.43 |
| IPI00241562 | reelin isoform a                                      | K.HSCQSDGNSIYFHGNEGSEFNFATTR.D             | 3 | 5.85 | 0.53 |       |
| IPI00241562 | reelin isoform a                                      | K.ISTKNPDFLKDDFEGQLESDRFLLM*SGGKPSR.K      | 4 | 3.81 | 0.26 | -2.25 |
| IPI00241562 | reelin isoform a                                      | K.IVVGCEATSCGDLHSVM*LEYTK.D                | 3 | 3.23 | 0.39 | -4.02 |
| IPI00241562 | reelin isoform a                                      | K.LCTPSM*DTTGYGNLR.F                       | 2 | 3.41 | 0.31 |       |
| IPI00241562 | reelin isoform a                                      | K.LLEHYSYLSYHEPR.I                         | 2 | 4.22 | 0.40 |       |

|             |                  |                                            |   |      |      |       |
|-------------|------------------|--------------------------------------------|---|------|------|-------|
| IPI00241562 | reelin isoform a | K.LLEHYSYLSYHEPR.I                         | 3 | 4.76 | 0.37 |       |
| IPI00241562 | reelin isoform a | K.LNIGCANQFSSTAPVLLQYSHDAGM*SWFLVK.E       | 3 | 5.48 | 0.49 | -1.48 |
| IPI00241562 | reelin isoform a | K.M*PVCGSTGDALVFIK.A                       | 2 | 4.60 | 0.43 | -2.51 |
| IPI00241562 | reelin isoform a | K.RITIQLPDHVSSSATQFR.W                     | 2 | 4.34 | 0.43 | -3.46 |
| IPI00241562 | reelin isoform a | K.RITIQLPDHVSSSATQFR.W                     | 3 | 4.00 | 0.47 | -3.78 |
| IPI00241562 | reelin isoform a | K.RITIQLPDHVSSSATQFR.W                     | 4 | 3.02 | 0.28 | -4.25 |
| IPI00241562 | reelin isoform a | K.RITYPLPESLVGNPVR.F                       | 2 | 3.45 | 0.37 | -4.50 |
| IPI00241562 | reelin isoform a | K.RITYPLPESLVGNPVR.F                       | 3 | 4.12 | 0.36 | -3.14 |
| IPI00241562 | reelin isoform a | K.SDGDRFAVTR.D                             | 2 | 2.04 | 0.07 | -2.46 |
| IPI00241562 | reelin isoform a | K.SGTSLIFKGEGLR.M                          | 2 | 2.45 | 0.21 | -4.27 |
| IPI00241562 | reelin isoform a | K.SLYFNGPGKR.E                             | 2 | 2.39 | 0.21 | -2.77 |
| IPI00241562 | reelin isoform a | K.VPSLSVSVINPELQTPATK.F                    | 2 | 5.20 | 0.46 |       |
| IPI00241562 | reelin isoform a | K.YSDM*QWAINFYLGPGCLDNCR.G                 | 2 | 5.17 | 0.64 | -5.30 |
| IPI00241562 | reelin isoform a | K.YSDM*QWAINFYLGPGCLDNCR.G                 | 3 | 4.92 | 0.31 | -5.83 |
| IPI00241562 | reelin isoform a | K.YTPHM*DNQVK.L                            | 2 | 1.99 | 0.23 |       |
| IPI00241562 | reelin isoform a | R.APDQPGEGVLLHYSYDNGITWK.L                 | 3 | 3.28 | 0.23 |       |
| IPI00241562 | reelin isoform a | R.APSSQNWLTVNGGK.L                         | 2 | 3.83 | 0.48 | -2.65 |
| IPI00241562 | reelin isoform a | R.DCLPTNVECSR.Y                            | 2 | 2.43 | 0.15 | -3.28 |
| IPI00241562 | reelin isoform a | R.DLTLKPGYVLQFK.L                          | 2 | 3.20 | 0.30 | -3.49 |
| IPI00241562 | reelin isoform a | R.DLTLKPGYVLQFK.L                          | 3 | 2.12 | 0.32 | -0.99 |
| IPI00241562 | reelin isoform a | R.ELDFM*SFLEPQIISIDL PQDAK.T               | 3 | 2.58 | 0.12 | -4.15 |
| IPI00241562 | reelin isoform a | R.ELIQPGYM*M*QFK.I                         | 2 | 4.09 | 0.36 | -4.03 |
| IPI00241562 | reelin isoform a | R.ELIQPGYM*M*QFK.I                         | 3 | 2.86 | 0.20 | -1.62 |
| IPI00241562 | reelin isoform a | R.EVVHFGK.L                                | 1 | 1.71 | 0.12 | -3.24 |
| IPI00241562 | reelin isoform a | R.EVYAVTHDLTPTEGWIM*QFK.I                  | 2 | 5.09 | 0.54 | -1.92 |
| IPI00241562 | reelin isoform a | R.EVYAVTHDLTPTEGWIM*QFK.I                  | 3 | 4.54 | 0.40 | -2.15 |
| IPI00241562 | reelin isoform a | R.EVYAVTHDLTPTEGWIMQFK.I                   | 2 | 5.42 | 0.57 | -2.04 |
| IPI00241562 | reelin isoform a | R.EVYAVTHDLTPTEGWIMQFK.I                   | 3 | 3.24 | 0.17 | -1.76 |
| IPI00241562 | reelin isoform a | R.FSYSDPSIIVLYAK.N                         | 2 | 4.23 | 0.37 |       |
| IPI00241562 | reelin isoform a | R.FYFVM*GGICDPGN SHENDIILYAK.I             | 3 | 3.57 | 0.22 |       |
| IPI00241562 | reelin isoform a | R.GAEVSFGCGVLASGK.A                        | 2 | 4.28 | 0.40 |       |
| IPI00241562 | reelin isoform a | R.GFGGPYCVPVVPLPSILK.D                     | 2 | 3.31 | 0.22 | -3.14 |
| IPI00241562 | reelin isoform a | R.GFGGPYCVPVVPLPSILKDDFNGNLHPDLWPEVYGAER.G | 3 | 5.12 | 0.48 | -1.94 |
| IPI00241562 | reelin isoform a | R.GFGGPYCVPVVPLPSILKDDFNGNLHPDLWPEVYGAER.G | 4 | 4.43 | 0.43 | -4.05 |
| IPI00241562 | reelin isoform a | R.GNLNGETIKSGTSLIFKGEGLR.M                 | 3 | 3.51 | 0.35 | -1.85 |
| IPI00241562 | reelin isoform a | R.HDGLDQNDWAINVLI S GSADQR.T               | 3 | 4.06 | 0.34 | -2.95 |
| IPI00241562 | reelin isoform a | R.IAFDM*FM*EDK.T                           | 2 | 3.51 | 0.42 | -2.72 |
| IPI00241562 | reelin isoform a | R.IISVELPGDAK.Q                            | 2 | 3.28 | 0.27 |       |
| IPI00241562 | reelin isoform a | R.ILVSDTFNK.W                              | 2 | 2.96 | 0.27 | -6.40 |
| IPI00241562 | reelin isoform a | R.IQGGQVDIDCLSM*DTALIFTENIGKPR.Y           | 3 | 2.91 | 0.24 | -1.24 |
| IPI00241562 | reelin isoform a | R.ITIQLPDHVSSSATQFR.W                      | 2 | 4.53 | 0.49 | -2.98 |
| IPI00241562 | reelin isoform a | R.ITIQLPDHVSSSATQFR.W                      | 3 | 5.08 | 0.53 | -3.75 |



|             |                                                    |                                            |   |      |      |       |
|-------------|----------------------------------------------------|--------------------------------------------|---|------|------|-------|
| IPI00241562 | reelin isoform a                                   | R.ITIVIPR.S                                | 2 | 1.87 | 0.10 | -3.00 |
| IPI00241562 | reelin isoform a                                   | R.ITLPLPPYTR.S                             | 2 | 2.41 | 0.24 | -1.75 |
| IPI00241562 | reelin isoform a                                   | R.ITVYLPLSTISPR.T                          | 2 | 3.78 | 0.45 | -4.50 |
| IPI00241562 | reelin isoform a                                   | R.ITVYLPLSTISPR.T                          | 3 | 2.39 | 0.15 | -2.78 |
| IPI00241562 | reelin isoform a                                   | R.ITYPLPESLVGNPVR.F                        | 2 | 3.61 | 0.50 | -5.85 |
| IPI00241562 | reelin isoform a                                   | R.LSSYHNFYSIR.G                            | 2 | 3.42 | 0.29 |       |
| IPI00241562 | reelin isoform a                                   | R.LSSYHNFYSIR.G                            | 3 | 2.30 | 0.20 |       |
| IPI00241562 | reelin isoform a                                   | R.QAATKPLDLTR.A                            | 2 | 1.94 | 0.18 | -1.62 |
| IPI00241562 | reelin isoform a                                   | R.QAATKPLDLTR.A                            | 3 | 1.91 | 0.12 | -3.60 |
| IPI00241562 | reelin isoform a                                   | R.QAVTQDLDLR.G                             | 1 | 1.17 | 0.10 | -2.95 |
| IPI00241562 | reelin isoform a                                   | R.QAVTQDLDLR.G                             | 2 | 3.13 | 0.26 | -3.10 |
| IPI00241562 | reelin isoform a                                   | R.QVVLEDSLDPVDTGNWLFFPGATVK.H              | 2 | 4.88 | 0.42 |       |
| IPI00241562 | reelin isoform a                                   | R.QVVLEDSLDPVDTGNWLFFPGATVK.H              | 3 | 4.83 | 0.43 |       |
| IPI00241562 | reelin isoform a                                   | R.RVIVLLPQK.T                              | 2 | 2.28 | 0.11 |       |
| IPI00241562 | reelin isoform a                                   | R.TVM*LDTFSSAPVPQHER.S                     | 2 | 2.91 | 0.29 | 2.52  |
| IPI00241562 | reelin isoform a                                   | R.TVM*LDTFSSAPVPQHER.S                     | 3 | 2.98 | 0.26 | 0.42  |
| IPI00241562 | reelin isoform a                                   | R.VIVLLPQK.T                               | 2 | 3.04 | 0.23 | -2.70 |
| IPI00241562 | reelin isoform a                                   | R.VSYNVPLEAR.M                             | 1 | 2.19 | 0.23 | -3.62 |
| IPI00241562 | reelin isoform a                                   | R.VSYNVPLEAR.M                             | 2 | 2.17 | 0.10 | -1.81 |
| IPI00241562 | reelin isoform a                                   | R.VTEANWETIQGGVIGSGCGQLAPYAHGDSLYFNGCQIR.Q | 3 | 5.89 | 0.52 | -1.61 |
| IPI00241562 | reelin isoform a                                   | R.WWQPFVISNGIVVSGVER.A                     | 2 | 5.23 | 0.49 | -4.19 |
| IPI00241562 | reelin isoform a                                   | R.WWQPFVISNGIVVSGVER.A                     | 3 | 5.32 | 0.32 | -3.64 |
| IPI00241562 | reelin isoform a                                   | R.YIALEIPLK.A                              | 2 | 3.10 | 0.29 | -0.55 |
| IPI00241562 | reelin isoform a                                   | R.YIALEIPLKAR.S                            | 2 | 2.08 | 0.23 | -3.12 |
| IPI00242905 | Uncharacterized protein ENSP00000344689 (Fragment) | R.KIEVNNATARVM*TNK.K                       | 2 | 1.13 | 0.09 | 1.70  |
| IPI00242905 | Uncharacterized protein ENSP00000344689 (Fragment) | R.VMTNKKTGPNPYTNGWK.L                      | 2 | 1.76 | 0.07 | -1.56 |
| IPI00242956 | IgGfC-binding protein precursor                    | D.PHYHSFDGR.K                              | 1 | 2.52 | 0.26 | -5.29 |
| IPI00242956 | IgGfC-binding protein precursor                    | D.PHYHSFDGR.K                              | 2 | 3.08 | 0.36 | -4.21 |
| IPI00242956 | IgGfC-binding protein precursor                    | D.PHYTTFDGR.R                              | 1 | 2.84 | 0.07 | -2.22 |
| IPI00242956 | IgGfC-binding protein precursor                    | D.PHYVTLDGHR.F                             | 1 | 2.80 | 0.30 | -5.14 |
| IPI00242956 | IgGfC-binding protein precursor                    | K.AGCVAESTAVCR.A                           | 2 | 3.86 | 0.45 | -2.72 |
| IPI00242956 | IgGfC-binding protein precursor                    | K.AIGYATAADCGR.T                           | 2 | 3.69 | 0.46 | -3.97 |
| IPI00242956 | IgGfC-binding protein precursor                    | K.AISGLTIDGHAVGAK.L                        | 2 | 4.69 | 0.40 | -1.31 |
| IPI00242956 | IgGfC-binding protein precursor                    | K.ALASYVAACQAAGVVIEDWR.A                   | 2 | 5.36 | 0.47 | -4.22 |
| IPI00242956 | IgGfC-binding protein precursor                    | K.ALASYVAACQAAGVVIEDWR.A                   | 3 | 4.87 | 0.43 | -3.72 |
| IPI00242956 | IgGfC-binding protein precursor                    | K.FYPAGDVLR.V                              | 1 | 1.92 | 0.23 | -2.57 |
| IPI00242956 | IgGfC-binding protein precursor                    | K.FYPAGDVLR.V                              | 2 | 2.46 | 0.26 | -2.49 |
| IPI00242956 | IgGfC-binding protein precursor                    | K.GCVLDVCM*GGGDHDILCK.A                    | 2 | 4.57 | 0.54 | -2.35 |
| IPI00242956 | IgGfC-binding protein precursor                    | K.GCVLDVCM*GGGDHDILCK.A                    | 3 | 2.46 | 0.16 | -2.36 |
| IPI00242956 | IgGfC-binding protein precursor                    | K.GCVLDVCM*GGGDRDILCK.A                    | 3 | 2.63 | 0.27 | -2.62 |

|             |                                 |                                             |   |      |      |       |
|-------------|---------------------------------|---------------------------------------------|---|------|------|-------|
| IPI00242956 | IgGfC-binding protein precursor | K.LASVSVSR.T                                | 2 | 2.24 | 0.17 | -3.62 |
| IPI00242956 | IgGfC-binding protein precursor | K.LDDGDYLCEDGCQNNCPACTPGQAQHYEGDRLCGM*LTK.L | 4 | 4.91 | 0.50 | -0.45 |
| IPI00242956 | IgGfC-binding protein precursor | K.LDGPFAVCHDTLDRPFLEQCQVYDLCVVGGER.L        | 3 | 1.82 | 0.12 | -3.65 |
| IPI00242956 | IgGfC-binding protein precursor | K.LDGPFAVCHDTLDRPFLEQCQVYDLCVVGGER.L        | 4 | 3.99 | 0.26 | -3.05 |
| IPI00242956 | IgGfC-binding protein precursor | K.LDPQGAVR.D                                | 2 | 1.90 | 0.10 | -3.35 |
| IPI00242956 | IgGfC-binding protein precursor | K.LDSLVAQQLQSK.N                            | 2 | 3.50 | 0.26 | -4.29 |
| IPI00242956 | IgGfC-binding protein precursor | K.LPVVLANGQIR.A                             | 1 | 2.28 | 0.09 | -1.70 |
| IPI00242956 | IgGfC-binding protein precursor | K.LPVVLANGQIR.A                             | 2 | 3.78 | 0.35 | -2.61 |
| IPI00242956 | IgGfC-binding protein precursor | K.LTYNHGGITGSR.G                            | 1 | 3.19 | 0.37 | -3.73 |
| IPI00242956 | IgGfC-binding protein precursor | K.LTYNHGGITGSR.G                            | 2 | 3.58 | 0.52 | -3.51 |
| IPI00242956 | IgGfC-binding protein precursor | K.LTYNHGGITGSR.G                            | 3 | 1.83 | 0.15 | -2.76 |
| IPI00242956 | IgGfC-binding protein precursor | K.NAAGDLQR.L                                | 2 | 2.16 | 0.16 | -2.98 |
| IPI00242956 | IgGfC-binding protein precursor | K.NTGREEFLTAFLQNYQLAY.S                     | 2 | 3.70 | 0.51 | -3.20 |
| IPI00242956 | IgGfC-binding protein precursor | K.NTGREEFLTAFLQNYQLAYSK.A                   | 2 | 4.99 | 0.52 | -4.18 |
| IPI00242956 | IgGfC-binding protein precursor | K.NTGREEFLTAFLQNYQLAYSK.A                   | 3 | 3.74 | 0.32 | -4.69 |
| IPI00242956 | IgGfC-binding protein precursor | K.VAVIVSNDHAGK.L                            | 1 | 2.90 | 0.38 | -2.70 |
| IPI00242956 | IgGfC-binding protein precursor | K.VAVIVSNDHAGK.L                            | 2 | 3.44 | 0.33 | -2.47 |
| IPI00242956 | IgGfC-binding protein precursor | K.VAVIVSNDHAGK.L                            | 3 | 2.45 | 0.09 | -2.15 |
| IPI00242956 | IgGfC-binding protein precursor | K.VPSSYAEALCGLCGNFNGDPADDLALR.G             | 3 | 5.15 | 0.54 | -6.97 |
| IPI00242956 | IgGfC-binding protein precursor | K.VRVNGVLTALPVSVADGR.I                      | 2 | 1.88 | 0.15 | -2.56 |
| IPI00242956 | IgGfC-binding protein precursor | K.VRVNGVLTALPVSVADGR.I                      | 3 | 2.47 | 0.16 | -6.20 |
| IPI00242956 | IgGfC-binding protein precursor | K.VTVNGVDM*K.L                              | 1 | 2.34 | 0.15 | -4.25 |
| IPI00242956 | IgGfC-binding protein precursor | K.VTVNGVDM*K.L                              | 2 | 3.19 | 0.29 | -3.21 |
| IPI00242956 | IgGfC-binding protein precursor | K.VTVNGVDM*KLPVVLANGQIR.A                   | 3 | 3.95 | 0.38 | -2.80 |
| IPI00242956 | IgGfC-binding protein precursor | K.YQKEEFCGLLSPTGPLSSCHK.L                   | 3 | 5.01 | 0.21 |       |
| IPI00242956 | IgGfC-binding protein precursor | N.PAVSYVR.V                                 | 1 | 1.87 | 0.22 | 0.95  |
| IPI00242956 | IgGfC-binding protein precursor | P.GWDPLCWDECR.G                             | 2 | 3.31 | 0.27 | -3.30 |
| IPI00242956 | IgGfC-binding protein precursor | R.APGWDPLCWDECR.G                           | 2 | 3.78 | 0.54 | -3.91 |
| IPI00242956 | IgGfC-binding protein precursor | R.ASQHGSVDVIETDFGLR.V                       | 2 | 4.82 | 0.58 | -3.61 |
| IPI00242956 | IgGfC-binding protein precursor | R.ASQHGSVDVIETDFGLR.V                       | 3 | 4.18 | 0.36 | -4.62 |
| IPI00242956 | IgGfC-binding protein precursor | R.AYSHSVSLTR.G                              | 1 | 2.60 | 0.30 | -4.38 |
| IPI00242956 | IgGfC-binding protein precursor | R.AYSHSVSLTR.G                              | 2 | 2.53 | 0.23 | -3.65 |
| IPI00242956 | IgGfC-binding protein precursor | R.CLANGGIHYITLDGR.V                         | 2 | 3.76 | 0.39 | -4.29 |
| IPI00242956 | IgGfC-binding protein precursor | R.CLANGGIHYITLDGR.V                         | 3 | 3.44 | 0.30 | -2.83 |
| IPI00242956 | IgGfC-binding protein precursor | R.CPGLQNTIPWYR.V                            | 2 | 4.01 | 0.41 | -2.47 |
| IPI00242956 | IgGfC-binding protein precursor | R.CSCSSSSGLTCQAAGCPPGR.V                    | 2 | 5.38 | 0.64 | -2.58 |
| IPI00242956 | IgGfC-binding protein precursor | R.EYPGQVLVDDVLQYLPFQAADGQVQVFR.Q            | 3 | 6.98 | 0.56 | -4.69 |
| IPI00242956 | IgGfC-binding protein precursor | R.FAVLQENVAWGNGR.V                          | 2 | 4.53 | 0.35 | 0.42  |
| IPI00242956 | IgGfC-binding protein precursor | R.GATTSPGVYELSSR.C                          | 2 | 3.45 | 0.40 | -4.29 |
| IPI00242956 | IgGfC-binding protein precursor | R.GATTSPGVYELSSR.C                          | 3 | 2.73 | 0.17 | -3.18 |
| IPI00242956 | IgGfC-binding protein precursor | R.GEVGFVLVDNQR.S                            | 2 | 3.08 | 0.28 | 2.04  |
| IPI00242956 | IgGfC-binding protein precursor | R.GNPAVSYVR.V                               | 1 | 2.11 | 0.28 | -1.80 |

|             |                                 |                                        |   |      |      |       |
|-------------|---------------------------------|----------------------------------------|---|------|------|-------|
| IPI00242956 | IgGfC-binding protein precursor | R.GNPAVSYVR.V                          | 2 | 3.20 | 0.42 | -0.25 |
| IPI00242956 | IgGfC-binding protein precursor | R.GSQAVSYTR.S                          | 1 | 2.35 | 0.35 | -0.74 |
| IPI00242956 | IgGfC-binding protein precursor | R.GSQAVSYTR.S                          | 2 | 3.49 | 0.27 | -1.61 |
| IPI00242956 | IgGfC-binding protein precursor | R.GSQTVSYTR.A                          | 1 | 1.78 | 0.21 | -0.51 |
| IPI00242956 | IgGfC-binding protein precursor | R.GSQTVSYTR.A                          | 2 | 2.10 | 0.18 | 1.69  |
| IPI00242956 | IgGfC-binding protein precursor | R.ISVAQGASK.A                          | 1 | 1.85 | 0.21 | -2.50 |
| IPI00242956 | IgGfC-binding protein precursor | R.ISVAQGASK.A                          | 2 | 2.63 | 0.25 | -3.51 |
| IPI00242956 | IgGfC-binding protein precursor | R.ISVTQGASK.A                          | 1 | 1.55 | 0.10 | -2.11 |
| IPI00242956 | IgGfC-binding protein precursor | R.ISVTQGASK.A                          | 2 | 2.62 | 0.12 | -2.03 |
| IPI00242956 | IgGfC-binding protein precursor | R.KFDFQGTCTNYVLATTGCPGVSTQGLTPFTVTTK.N | 3 | 6.10 | 0.41 |       |
| IPI00242956 | IgGfC-binding protein precursor | R.LLFDGDAHLLM*SIPSPFR.G                | 2 | 4.63 | 0.52 | -4.30 |
| IPI00242956 | IgGfC-binding protein precursor | R.LLISLSESPASVSILSQADNTSK.K            | 2 | 5.09 | 0.59 | -4.13 |
| IPI00242956 | IgGfC-binding protein precursor | R.LLISLSESPASVSILSQADNTSK.K            | 3 | 3.34 | 0.24 | -4.04 |
| IPI00242956 | IgGfC-binding protein precursor | R.LLISLSESPASVSILSQADNTSKK.V           | 3 | 3.86 | 0.48 | -2.96 |
| IPI00242956 | IgGfC-binding protein precursor | R.LPVSLSEGR.L                          | 2 | 2.71 | 0.25 | -1.42 |
| IPI00242956 | IgGfC-binding protein precursor | R.LRVPAAYAGSLCGLCGNYNQDPADDLK.A        | 3 | 5.84 | 0.52 | -2.50 |
| IPI00242956 | IgGfC-binding protein precursor | R.NEVTYDPYLVLPDVAAYCPAYVVK.S           | 2 | 4.40 | 0.39 | -5.34 |
| IPI00242956 | IgGfC-binding protein precursor | R.NEVTYDPYLVLPDVAAYCPAYVVK.S           | 3 | 6.03 | 0.49 | -5.86 |
| IPI00242956 | IgGfC-binding protein precursor | R.REYPGQVLVDDVLQYLPFQAADGQVQVFR.Q      | 3 | 6.84 | 0.54 | -4.66 |
| IPI00242956 | IgGfC-binding protein precursor | R.RVSYVGLVTVR.A                        | 2 | 2.97 | 0.29 | -3.49 |
| IPI00242956 | IgGfC-binding protein precursor | R.RVSYVGLVTVR.A                        | 3 | 3.43 | 0.23 | -4.14 |
| IPI00242956 | IgGfC-binding protein precursor | R.SLAAYTAACQAAGVAVKPWR.T               | 3 | 3.94 | 0.42 | -4.87 |
| IPI00242956 | IgGfC-binding protein precursor | R.SPANCP LSCPANSR.Y                    | 2 | 3.82 | 0.39 | -2.28 |
| IPI00242956 | IgGfC-binding protein precursor | R.SRLPVSLSEGR.L                        | 2 | 2.61 | 0.28 | -2.79 |
| IPI00242956 | IgGfC-binding protein precursor | R.TCQGS CAALSGLTGCTTR.C                | 2 | 5.43 | 0.51 | -2.68 |
| IPI00242956 | IgGfC-binding protein precursor | R.TPDG SLLVR.Q                         | 2 | 3.29 | 0.28 | -3.89 |
| IPI00242956 | IgGfC-binding protein precursor | R.VAYDLVYYVR.V                         | 1 | 2.84 | 0.34 | -2.79 |
| IPI00242956 | IgGfC-binding protein precursor | R.VAYDLVYYVR.V                         | 2 | 3.81 | 0.27 | -3.57 |
| IPI00242956 | IgGfC-binding protein precursor | R.VDLPAEK.L                            | 1 | 1.43 | 0.08 | -3.43 |
| IPI00242956 | IgGfC-binding protein precursor | R.VDVTLPSSYHGAVCGLCGNM*DR.N            | 3 | 2.52 | 0.21 | -2.53 |
| IPI00242956 | IgGfC-binding protein precursor | R.VLVENEHRGSQTVSYTR.A                  | 2 | 3.33 | 0.33 | -4.62 |
| IPI00242956 | IgGfC-binding protein precursor | R.VLVENEHRGSQTVSYTR.A                  | 3 | 3.64 | 0.47 | -3.69 |
| IPI00242956 | IgGfC-binding protein precursor | R.VLVENEHRGSQTVSYTR.A                  | 4 | 2.67 | 0.10 | -2.14 |
| IPI00242956 | IgGfC-binding protein precursor | R.VNGVLTALPVSVADGR.I                   | 2 | 5.00 | 0.42 | -3.17 |
| IPI00242956 | IgGfC-binding protein precursor | R.VPAAYAASL CGLCGNYNQDPADDLK.A         | 3 | 5.58 | 0.37 | -4.10 |
| IPI00242956 | IgGfC-binding protein precursor | R.VPAAYAGSLCGLCGNYNQDPADDLK.A          | 3 | 6.63 | 0.45 | -4.08 |
| IPI00242956 | IgGfC-binding protein precursor | R.VSYVGLVTVR.A                         | 2 | 4.07 | 0.39 | -1.13 |
| IPI00242956 | IgGfC-binding protein precursor | R.VTAKVPSSYAEALCGLCGNFNGDPADDLALR.G    | 3 | 6.93 | 0.64 | -3.07 |
| IPI00242956 | IgGfC-binding protein precursor | R.VTLQPYNVAQLQSSVDLSGSK.V              | 2 | 5.67 | 0.60 | -4.75 |
| IPI00242956 | IgGfC-binding protein precursor | R.VTLQPYNVAQLQSSVDLSGSK.V              | 3 | 6.34 | 0.59 | -5.41 |
| IPI00242956 | IgGfC-binding protein precursor | R.VTVPGNYYQLM*CGLCGNYNGDPK.D           | 3 | 3.45 | 0.20 | -1.87 |
| IPI00242956 | IgGfC-binding protein precursor | R.VVTVAALGTNISIHKDEIGK.V               | 3 | 2.88 | 0.27 | -3.75 |

|             |                                                      |                                        |   |      |      |       |
|-------------|------------------------------------------------------|----------------------------------------|---|------|------|-------|
| IPI00242956 | IgGfC-binding protein precursor                      | R.VVTVAALGTNISIHKDEIGK.V               | 4 | 2.65 | 0.33 | -2.84 |
| IPI00242956 | IgGfC-binding protein precursor                      | R.VVTVAALGTNISIHKDEIGKVR.V             | 3 | 3.69 | 0.47 | -4.24 |
| IPI00242956 | IgGfC-binding protein precursor                      | R.VYDLHGSCSYVLAQVCHPKPGDEDFSVLEK.N     | 4 | 4.79 | 0.35 | -3.98 |
| IPI00242956 | IgGfC-binding protein precursor                      | R.YDLAFVVASQATK.L                      | 2 | 4.46 | 0.50 | -3.69 |
| IPI00242956 | IgGfC-binding protein precursor                      | R.YDLAFVVASQATK.L                      | 3 | 4.46 | 0.29 | -2.18 |
| IPI00242956 | IgGfC-binding protein precursor                      | R.YYPLGEVFPYPECER.R                    | 2 | 5.02 | 0.61 | -3.09 |
| IPI00243221 | nardilysin (N-arginine dibasic convertase) isoform a | K.IENLTEEAFNTQVTALIK.L                 | 2 | 2.80 | 0.13 |       |
| IPI00243338 | 24 kDa protein                                       | -.M*EKHHVPSDFNVNVK.V                   | 2 | 2.33 | 0.12 |       |
| IPI00243451 | Liver-specific organic anion transporter 3TM12       | K.KSHGKDTKVLENERQVM*DEA.N              | 2 | 3.49 | 0.15 | -0.52 |
| IPI00243995 | Serine/threonine-protein kinase Nek5                 | K.HIHDRKILHRDIKQNIPLSK.N               | 2 | 3.01 | 0.07 |       |
| IPI00245940 | immunoglobulin superfamily 5 like                    | K.ERSTADTLPDLEEWKSAAGLR.W              | 3 | 2.77 | 0.19 |       |
| IPI00246058 | PDCD6IP protein                                      | K.NLATAYDNFVELVANLK.E                  | 2 | 5.25 | 0.49 | -5.28 |
| IPI00246058 | PDCD6IP protein                                      | K.NLATAYDNFVELVANLK.E                  | 3 | 4.08 | 0.32 | -3.86 |
| IPI00246058 | PDCD6IP protein                                      | K.STPVNVPISQK.F                        | 2 | 2.15 | 0.06 | -1.32 |
| IPI00246058 | PDCD6IP protein                                      | K.TM*QGSEVVNLK.S                       | 2 | 2.44 | 0.10 | -0.41 |
| IPI00246058 | PDCD6IP protein                                      | R.EATTLANGVLASLNLPAAIEDVSGDTVPQSILTK.S | 3 | 3.09 | 0.27 | -3.21 |
| IPI00246058 | PDCD6IP protein                                      | R.EPTVDISPDTVGLSLIMLAQAQEVFFLK.A       | 3 | 3.49 | 0.34 | -2.49 |
| IPI00246058 | PDCD6IP protein                                      | R.LLDEEEATDNDLR.A                      | 2 | 3.82 | 0.43 | -2.06 |
| IPI00246058 | PDCD6IP protein                                      | R.TPSNELYKPLRAEGTNFR.T                 | 3 | 2.43 | 0.15 | -3.77 |
| IPI00247243 | 31 kDa protein                                       | A.AEAVSHIQSSGPR.R                      | 2 | 3.41 | 0.38 | -3.66 |
| IPI00247243 | 31 kDa protein                                       | A.SPPSGQAVLLR.Q                        | 1 | 2.57 | 0.33 | -4.39 |
| IPI00247243 | 31 kDa protein                                       | E.AVSHIQSSGPR.R                        | 2 | 3.05 | 0.33 | -2.82 |
| IPI00247243 | 31 kDa protein                                       | K.EPPRELLHELALSVPGAR.S                 | 2 | 1.68 | 0.28 | -4.15 |
| IPI00247243 | 31 kDa protein                                       | K.EPPRELLHELALSVPGAR.S                 | 3 | 3.87 | 0.42 | -5.76 |
| IPI00247243 | 31 kDa protein                                       | R.EGDDIEM*PCAFR.A                      | 2 | 3.03 | 0.42 | -1.75 |
| IPI00247243 | 31 kDa protein                                       | R.ELLHELALSVPGAR.S                     | 2 | 2.76 | 0.11 | -3.54 |
| IPI00247243 | 31 kDa protein                                       | R.HGPASAANANNAGAASR.T                  | 2 | 4.06 | 0.50 | -4.56 |
| IPI00247243 | 31 kDa protein                                       | R.LQDEGVYECR.V                         | 2 | 2.99 | 0.26 | -2.04 |
| IPI00247243 | 31 kDa protein                                       | R.VQGNDISHR.L                          | 2 | 2.68 | 0.17 | -0.82 |
| IPI00247243 | 31 kDa protein                                       | R.VSDYSDDDTQEHK.A                      | 2 | 4.01 | 0.56 | -3.65 |
| IPI00247243 | 31 kDa protein                                       | R.VSDYSDDDTQEHK.A                      | 3 | 3.47 | 0.45 | -1.14 |
| IPI00247243 | 31 kDa protein                                       | R.VSDYSDDDTQEHK AQAM*LR.V              | 3 | 3.52 | 0.49 | -3.30 |
| IPI00248596 | similar to slit homolog 1                            | R.SVQYASLSR.F                          | 2 | 2.65 | 0.16 | -2.19 |
| IPI00249982 | Isoform 1 of Death-inducer obliterator 1             | K.AAAMAASKK.T                          | 2 | 2.80 | 0.14 |       |
| IPI00250724 | Protein kinase-like domain containing protein        | K.AISDIALSFLDM*VNHFDSDFSHR.L           | 3 | 3.70 | 0.32 | -1.10 |
| IPI00250724 | Protein kinase-like domain containing protein        | R.VNNNLQVICDK.I                        | 2 | 3.28 | 0.23 | -2.31 |
| IPI00251507 | Isoform IB of Synapsin-1                             | K.LWVDTCSEIFGGLDICAVEALHGK.D           | 3 | 2.91 | 0.33 | -1.32 |
| IPI00251507 | Isoform IB of Synapsin-1                             | R.QASQAGPVPR.T                         | 2 | 2.52 | 0.28 | -0.19 |
| IPI00251507 | Isoform IB of Synapsin-1                             | R.QGPPQKPPGPAGPTR.Q                    | 3 | 2.10 | 0.12 | -2.16 |
| IPI00251507 | Isoform IB of Synapsin-1                             | R.QTSVSGPAPPK.A                        | 2 | 2.02 | 0.24 | -2.48 |
| IPI00251596 | Isoform 1 of Collagen alpha-1(XXIII) chain           | R.VAALEEEERELLRR.A                     | 3 | 2.66 | 0.12 | -2.20 |

|             |                                                                                 |                                                |   |      |      |       |
|-------------|---------------------------------------------------------------------------------|------------------------------------------------|---|------|------|-------|
| IPI00252731 | Isoform DPPX-S of Dipeptidyl aminopeptidase-like protein 6                      | K.IHDPEAK.W                                    | 2 | 1.84 | 0.15 | -3.29 |
| IPI00252731 | Isoform DPPX-S of Dipeptidyl aminopeptidase-like protein 6                      | K.ILAYDEK.G                                    | 2 | 1.93 | 0.12 | -2.70 |
| IPI00252731 | Isoform DPPX-S of Dipeptidyl aminopeptidase-like protein 6                      | K.ILAYDEKGNKIYFLSTEDLPR.R                      | 4 | 3.15 | 0.20 | -1.82 |
| IPI00252731 | Isoform DPPX-S of Dipeptidyl aminopeptidase-like protein 6                      | K.IPHGDPQSLDPPEVSNAK.L                         | 3 | 2.53 | 0.12 | -1.46 |
| IPI00252731 | Isoform DPPX-S of Dipeptidyl aminopeptidase-like protein 6                      | K.IYFLSTEDLPR.R                                | 2 | 3.57 | 0.27 | -3.03 |
| IPI00252731 | Isoform DPPX-S of Dipeptidyl aminopeptidase-like protein 6                      | K.KKVTVEDLFSDFK.I                              | 2 | 4.63 | 0.46 | -3.17 |
| IPI00252731 | Isoform DPPX-S of Dipeptidyl aminopeptidase-like protein 6                      | K.KKVTVEDLFSDFKIHDPPEAK.W                      | 5 | 2.62 | 0.13 | -2.40 |
| IPI00252731 | Isoform DPPX-S of Dipeptidyl aminopeptidase-like protein 6                      | K.LYASAFSER.Y                                  | 2 | 2.98 | 0.29 | -1.06 |
| IPI00252731 | Isoform DPPX-S of Dipeptidyl aminopeptidase-like protein 6                      | K.M*FDLETNEHVKK.A                              | 2 | 3.65 | 0.34 | -0.80 |
| IPI00252731 | Isoform DPPX-S of Dipeptidyl aminopeptidase-like protein 6                      | K.VTVEDLFSDFK.I                                | 2 | 1.97 | 0.16 | -3.14 |
| IPI00252731 | Isoform DPPX-S of Dipeptidyl aminopeptidase-like protein 6                      | K.VTVEDLFSDFKIHDPPEAK.W                        | 3 | 3.37 | 0.22 | -2.52 |
| IPI00252731 | Isoform DPPX-S of Dipeptidyl aminopeptidase-like protein 6                      | K.VTVEDLFSDFKIHDPPEAK.W                        | 4 | 2.50 | 0.25 | -0.69 |
| IPI00252731 | Isoform DPPX-S of Dipeptidyl aminopeptidase-like protein 6                      | L.TPAEDNSLSQK.K                                | 2 | 2.93 | 0.34 | -2.15 |
| IPI00252731 | Isoform DPPX-S of Dipeptidyl aminopeptidase-like protein 6                      | R.LGLLEEKDQM*EAVR.T                            | 3 | 3.77 | 0.36 | -0.69 |
| IPI00252731 | Isoform DPPX-S of Dipeptidyl aminopeptidase-like protein 6                      | R.SIINFFVECFR.I                                | 2 | 3.72 | 0.45 | -3.35 |
| IPI00252731 | Isoform DPPX-S of Dipeptidyl aminopeptidase-like protein 6                      | R.TM*LKEQYIDR.T                                | 2 | 1.99 | 0.12 | -2.69 |
| IPI00252731 | Isoform DPPX-S of Dipeptidyl aminopeptidase-like protein 6                      | R.VSALEEQQFLIIHPTADEK.I                        | 3 | 4.23 | 0.45 | -3.99 |
| IPI00252731 | Isoform DPPX-S of Dipeptidyl aminopeptidase-like protein 6                      | S.VILLTPAEDNSLSQK.K                            | 2 | 3.49 | 0.38 | -1.75 |
| IPI00252845 | SYT9 protein                                                                    | -.MLAKVVEGD LAFKGG.R.D                         | 2 | 1.96 | 0.05 | 1.80  |
| IPI00253281 | Isoform 2 of Epidermal growth factor receptor kinase substrate 8-like protein 1 | R.IWGSSQDEAELIR.E                              | 2 | 1.76 | 0.09 | -6.75 |
| IPI00255145 | hypothetical protein                                                            | K.QAMSPEDKKRAVKYSM*SHIAQIPVKHDSLK.E            | 3 | 4.08 | 0.10 |       |
| IPI00257508 | Dihydropyrimidinase-related protein 2                                           | K.AAAFVTSPLSPDPTPDFLNSLLSCGDLQVTGSAHCTFNATQK.A | 4 | 2.42 | 0.11 | -1.61 |
| IPI00257508 | Dihydropyrimidinase-related protein 2                                           | R.FQM*PDQGM*TSADFFQGTK.A                       | 2 | 2.44 | 0.12 |       |

|             |                                                                   |                                  |   |      |      |       |
|-------------|-------------------------------------------------------------------|----------------------------------|---|------|------|-------|
| IPI00257508 | Dihydropyrimidinase-related protein 2                             | R.IVNDQSFYADIYMEDGLIK.Q          | 2 | 5.84 | 0.53 | -2.08 |
| IPI00257508 | Dihydropyrimidinase-related protein 2                             | R.IVNDQSFYADIYMEDGLIK.Q          | 3 | 3.23 | 0.23 | -1.74 |
| IPI00257508 | Dihydropyrimidinase-related protein 2                             | R.NLHQSGFSLSGAQIDNIPR.R          | 3 | 2.51 | 0.11 | -1.66 |
| IPI00257882 | Xaa-Pro dipeptidase                                               | K.VPLALFALNR.Q                   | 2 | 4.28 | 0.38 | -1.35 |
| IPI00257882 | Xaa-Pro dipeptidase                                               | K.YAVDDVQYVDEIASVLTSQKPSVLLTLR.G | 3 | 5.45 | 0.49 | -4.83 |
| IPI00259102 | Mammalian ependymin-related protein 1 precursor                   | K.DGVM*FQIDQATK.Q                | 2 | 4.34 | 0.42 | -5.08 |
| IPI00259102 | Mammalian ependymin-related protein 1 precursor                   | R.ALLSYDGLNQR.V                  | 2 | 3.65 | 0.36 | -3.94 |
| IPI00259102 | Mammalian ependymin-related protein 1 precursor                   | R.LFEYILLYK.D                    | 2 | 3.54 | 0.21 | -5.11 |
| IPI00259102 | Mammalian ependymin-related protein 1 precursor                   | R.QVM*YQQSSGR.N                  | 2 | 2.61 | 0.42 | -2.43 |
| IPI00259102 | Mammalian ependymin-related protein 1 precursor                   | R.SYETWIGIYTVK.D                 | 2 | 4.04 | 0.33 | -7.53 |
| IPI00260755 | similar to Rho GTPase activating protein 18                       | K.CSLPKFTVPKGR LGVTR.I           | 2 | 2.60 | 0.14 |       |
| IPI00289058 | Ly-6/neurotoxin-like protein 1 precursor                          | A.LDCHVCAYNGDNCFNPM*R.C          | 2 | 4.20 | 0.63 | -1.99 |
| IPI00289058 | Ly-6/neurotoxin-like protein 1 precursor                          | A.LDCHVCAYNGDNCFNPM*R.C          | 3 | 3.91 | 0.44 | -1.28 |
| IPI00289058 | Ly-6/neurotoxin-like protein 1 precursor                          | R.CFETVYDGYSK.H                  | 1 | 3.07 | 0.44 | -3.03 |
| IPI00289058 | Ly-6/neurotoxin-like protein 1 precursor                          | R.CFETVYDGYSK.H                  | 2 | 4.70 | 0.54 | -3.73 |
| IPI00289058 | Ly-6/neurotoxin-like protein 1 precursor                          | R.CPAM*VAYCM*TTR.T               | 2 | 4.22 | 0.40 | -3.81 |
| IPI00289058 | Ly-6/neurotoxin-like protein 1 precursor                          | R.CPAM*VAYCM*TTR.T               | 3 | 3.79 | 0.41 | -2.04 |
| IPI00289058 | Ly-6/neurotoxin-like protein 1 precursor                          | R.CPAMVAYCM*TTR.T                | 2 | 2.76 | 0.29 |       |
| IPI00289058 | Ly-6/neurotoxin-like protein 1 precursor                          | R.TYYTPTR.M                      | 1 | 1.72 | 0.28 | -1.29 |
| IPI00289058 | Ly-6/neurotoxin-like protein 1 precursor                          | R.TYYTPTR.M                      | 2 | 1.72 | 0.31 | -1.70 |
| IPI00289083 | Isoform 1 of VWFA and cache domain-containing protein 1 precursor | A.DFSILDEAQVLASQM*R.R            | 2 | 4.91 | 0.43 | -3.33 |
| IPI00289083 | Isoform 1 of VWFA and cache domain-containing protein 1 precursor | A.DFSILDEAQVLASQM*R.R            | 3 | 4.73 | 0.46 | -2.55 |
| IPI00289083 | Isoform 1 of VWFA and cache domain-containing protein 1 precursor | K.DAAQVILSAIDEHDKISVLTVA DTVR.T  | 4 | 4.29 | 0.32 | -3.07 |
| IPI00289083 | Isoform 1 of VWFA and cache domain-containing protein 1 precursor | K.GSM*M*VLNQLSNLETTVGR.F         | 2 | 5.63 | 0.54 | -1.43 |
| IPI00289083 | Isoform 1 of VWFA and cache domain-containing protein 1 precursor | K.GSM*M*VLNQLSNLETTVGR.F         | 3 | 4.69 | 0.37 | -2.68 |
| IPI00289083 | Isoform 1 of VWFA and cache domain-containing protein 1 precursor | K.ISNGESEVQQLAK.K                | 2 | 4.22 | 0.27 | -3.53 |
| IPI00289083 | Isoform 1 of VWFA and cache domain-containing protein 1 precursor | K.M*STFVSSVK.S                   | 2 | 2.58 | 0.24 | -1.80 |
| IPI00289083 | Isoform 1 of VWFA and cache domain-containing protein 1 precursor | K.NLNTVPSSK.L                    | 2 | 2.15 | 0.15 | -0.31 |
| IPI00289083 | Isoform 1 of VWFA and cache domain-containing protein 1 precursor | K.SSDSPTQHAVGFQK.A               | 2 | 3.55 | 0.44 | -3.48 |
| IPI00289083 | Isoform 1 of VWFA and cache domain-containing protein 1 precursor | K.TFLSPATSETK.R                  | 2 | 2.67 | 0.23 | -0.80 |
| IPI00289083 | Isoform 1 of VWFA and cache domain-containing protein 1 precursor | K.TFLSPATSETKR.K                 | 2 | 2.35 | 0.09 | -2.82 |

|             |                                                                   |                                    |   |      |      |       |
|-------------|-------------------------------------------------------------------|------------------------------------|---|------|------|-------|
| IPI00289083 | Isoform 1 of VWFA and cache domain-containing protein 1 precursor | K.WQYFSSEEGIFTVFAHK.F              | 3 | 3.69 | 0.46 | -1.91 |
| IPI00289083 | Isoform 1 of VWFA and cache domain-containing protein 1 precursor | R.AFNPGRDLNSVLADNLK.S              | 3 | 3.68 | 0.37 | -2.63 |
| IPI00289083 | Isoform 1 of VWFA and cache domain-containing protein 1 precursor | R.CFIM*EDR.G                       | 2 | 1.62 | 0.07 | -0.42 |
| IPI00289083 | Isoform 1 of VWFA and cache domain-containing protein 1 precursor | R.IFNSFVYTEK.I                     | 2 | 3.75 | 0.30 | -2.97 |
| IPI00289083 | Isoform 1 of VWFA and cache domain-containing protein 1 precursor | R.LIANPGLK.F                       | 1 | 1.77 | 0.05 | -3.57 |
| IPI00289083 | Isoform 1 of VWFA and cache domain-containing protein 1 precursor | R.LSTTVNSR.A                       | 2 | 1.89 | 0.15 | -0.79 |
| IPI00289083 | Isoform 1 of VWFA and cache domain-containing protein 1 precursor | R.M*VEHYTAYLSDNTR.L                | 2 | 4.24 | 0.50 | -3.87 |
| IPI00289083 | Isoform 1 of VWFA and cache domain-containing protein 1 precursor | R.M*VEHYTAYLSDNTR.L                | 3 | 3.87 | 0.20 | -3.26 |
| IPI00289083 | Isoform 1 of VWFA and cache domain-containing protein 1 precursor | R.SRPIYVSTVRPQSK.H                 | 3 | 3.27 | 0.14 | -2.83 |
| IPI00289083 | Isoform 1 of VWFA and cache domain-containing protein 1 precursor | R.YLDVVNR.N                        | 2 | 2.48 | 0.22 | -2.01 |
| IPI00289204 | Reticulon-4 receptor precursor                                    | K.VTTSCPQQGLQAVPVGIPAASQR.I        | 2 | 4.91 | 0.61 | -4.35 |
| IPI00289204 | Reticulon-4 receptor precursor                                    | K.VTTSCPQQGLQAVPVGIPAASQR.I        | 3 | 3.79 | 0.29 | -2.77 |
| IPI00289204 | Reticulon-4 receptor precursor                                    | P.CPGACVCYNEPK.V                   | 2 | 3.70 | 0.44 | -3.60 |
| IPI00289204 | Reticulon-4 receptor precursor                                    | R.ATDEEPLGLPK.C                    | 2 | 3.42 | 0.43 | -3.58 |
| IPI00289204 | Reticulon-4 receptor precursor                                    | R.CGLQELGPGFLFR.G                  | 2 | 4.64 | 0.37 | -3.60 |
| IPI00289204 | Reticulon-4 receptor precursor                                    | R.GLAALQYLYLQDNALQALPDDTFR.D       | 2 | 5.63 | 0.48 | -5.33 |
| IPI00289204 | Reticulon-4 receptor precursor                                    | R.GLAALQYLYLQDNALQALPDDTFR.D       | 3 | 5.53 | 0.49 | -5.08 |
| IPI00289204 | Reticulon-4 receptor precursor                                    | R.GSSSEVPCSLPQR.L                  | 2 | 2.50 | 0.22 | -1.79 |
| IPI00289204 | Reticulon-4 receptor precursor                                    | R.IDAAAFGLALLEQLDLSDNAQLR.S        | 2 | 6.03 | 0.48 | -3.48 |
| IPI00289204 | Reticulon-4 receptor precursor                                    | R.IDAAAFGLALLEQLDLSDNAQLR.S        | 3 | 8.08 | 0.54 | -4.86 |
| IPI00289204 | Reticulon-4 receptor precursor                                    | R.IDAAAFGLALLEQLDLSDNAQLR.S        | 4 | 5.96 | 0.39 | -2.90 |
| IPI00289204 | Reticulon-4 receptor precursor                                    | R.ISHVPAAASFR.A                    | 1 | 2.96 | 0.26 | -4.25 |
| IPI00289204 | Reticulon-4 receptor precursor                                    | R.ISHVPAAASFR.A                    | 2 | 2.27 | 0.19 | -2.86 |
| IPI00289204 | Reticulon-4 receptor precursor                                    | R.LHTLHLDR.C                       | 2 | 2.15 | 0.18 | -2.18 |
| IPI00289204 | Reticulon-4 receptor precursor                                    | R.LLLHQNR.V                        | 1 | 2.09 | 0.07 | -4.18 |
| IPI00289204 | Reticulon-4 receptor precursor                                    | R.LLLHQNR.V                        | 2 | 2.29 | 0.10 | -2.96 |
| IPI00289204 | Reticulon-4 receptor precursor                                    | R.SVDPATFHGLGR.L                   | 1 | 1.41 | 0.22 | -2.06 |
| IPI00289204 | Reticulon-4 receptor precursor                                    | R.VAHVHPHAFR.D                     | 2 | 2.63 | 0.32 | -3.23 |
| IPI00289271 | Liprin-alpha-2                                                    | K.LNSALPQDIESLTGGLAGSK.G           | 3 | 3.54 | 0.16 | -3.21 |
| IPI00289329 | Ephrin type-B receptor 3 precursor                                | K.VDTIAPDESFSR.L                   | 2 | 3.01 | 0.31 | -2.81 |
| IPI00289334 | Isoform 1 of Filamin-B                                            | R.QMQLENVSVALEFLDRESIK.L           | 3 | 2.96 | 0.24 | -3.88 |
| IPI00289501 | Neurosecretory protein VGF precursor                              | A.APPGRPEAQPPPLSSEHKPEVAGDAVPGPK.D | 2 | 3.86 | 0.56 | -3.46 |

|             |                                      |                                             |   |      |      |       |
|-------------|--------------------------------------|---------------------------------------------|---|------|------|-------|
| IPI00289501 | Neurosecretory protein VGF precursor | A.APPGRPEAQPPPLSSEHKPEVAGDAVPGPK.D          | 3 | 5.74 | 0.55 | -4.83 |
| IPI00289501 | Neurosecretory protein VGF precursor | A.APPGRPEAQPPPLSSEHKPEVAGDAVPGPKDGSAPFVR.G  | 4 | 5.62 | 0.48 | -4.09 |
| IPI00289501 | Neurosecretory protein VGF precursor | A.AVLLQALDRPASPPAPSGSQGGPEEEAAEALLTETVR.S   | 3 | 6.61 | 0.57 | -2.86 |
| IPI00289501 | Neurosecretory protein VGF precursor | A.DLASDLLLQYLLQGGAR.Q                       | 2 | 5.03 | 0.40 | -3.41 |
| IPI00289501 | Neurosecretory protein VGF precursor | A.DLASDLLLQYLLQGGAR.Q                       | 3 | 5.23 | 0.33 | -1.30 |
| IPI00289501 | Neurosecretory protein VGF precursor | A.LAAVLLQALDRPASPPAPSGSQGGPEEEAAEALLTETVR.S | 4 | 4.75 | 0.41 | -4.82 |
| IPI00289501 | Neurosecretory protein VGF precursor | A.LDRPASPPAPSGSQGGPEEEAAEALLTETVR.S         | 3 | 6.57 | 0.52 | -4.81 |
| IPI00289501 | Neurosecretory protein VGF precursor | A.PPGRPEAQPPPLSSEHKPEVAGDAVPGPK.D           | 3 | 6.01 | 0.49 | -4.55 |
| IPI00289501 | Neurosecretory protein VGF precursor | A.PPGRPEAQPPPLSSEHKPEVAGDAVPGPK.D           | 4 | 4.94 | 0.40 | -4.26 |
| IPI00289501 | Neurosecretory protein VGF precursor | A.PPGRPEAQPPPLSSEHKPEVAGDAVPGPKDGSAPFVR.G   | 4 | 5.00 | 0.43 | -4.26 |
| IPI00289501 | Neurosecretory protein VGF precursor | A.SDLLLQYLLQGGAR.Q                          | 2 | 4.18 | 0.35 | -3.86 |
| IPI00289501 | Neurosecretory protein VGF precursor | A.VLLQALDRPASPPAPSGSQGGPEEEAAEALLTETVR.S    | 4 | 4.93 | 0.37 | -4.31 |
| IPI00289501 | Neurosecretory protein VGF precursor | D.PSEEEALASLLQELR.D                         | 2 | 4.82 | 0.29 | -4.73 |
| IPI00289501 | Neurosecretory protein VGF precursor | D.PSEEEALASLLQELR.D                         | 3 | 4.35 | 0.13 | -2.64 |
| IPI00289501 | Neurosecretory protein VGF precursor | G.RPEAQPPPLSSEHKPEVAGDAVPGPK.D              | 3 | 5.38 | 0.49 | -3.83 |
| IPI00289501 | Neurosecretory protein VGF precursor | G.RPEAQPPPLSSEHKPEVAGDAVPGPK.D              | 4 | 6.17 | 0.57 | -4.29 |
| IPI00289501 | Neurosecretory protein VGF precursor | K.AYQGVAAFPFK.A                             | 1 | 2.71 | 0.37 | -2.95 |
| IPI00289501 | Neurosecretory protein VGF precursor | K.AYQGVAAFPFK.A                             | 2 | 3.94 | 0.38 | -2.88 |
| IPI00289501 | Neurosecretory protein VGF precursor | K.AYQGVAAFPFK.A.R                           | 1 | 2.62 | 0.34 | -1.51 |
| IPI00289501 | Neurosecretory protein VGF precursor | K.AYQGVAAFPFK.A.R                           | 2 | 4.51 | 0.44 | -1.69 |
| IPI00289501 | Neurosecretory protein VGF precursor | K.DGSAPFVR.G                                | 1 | 1.55 | 0.19 | -2.72 |
| IPI00289501 | Neurosecretory protein VGF precursor | K.DGSAPFVR.G                                | 2 | 2.38 | 0.22 | -3.92 |
| IPI00289501 | Neurosecretory protein VGF precursor | K.FGEGVSSPK.T                               | 1 | 1.94 | 0.11 | -3.61 |
| IPI00289501 | Neurosecretory protein VGF precursor | K.FGEGVSSPK.T                               | 2 | 3.60 | 0.25 | -3.25 |
| IPI00289501 | Neurosecretory protein VGF precursor | K.LHLPADDVVS.I                              | 1 | 1.85 | 0.28 | -1.93 |
| IPI00289501 | Neurosecretory protein VGF precursor | K.LHLPADDVVSIIIEV.E                         | 2 | 3.09 | 0.26 | -5.65 |
| IPI00289501 | Neurosecretory protein VGF precursor | K.LHLPADDVVSIIIEV.E                         | 2 | 3.80 | 0.34 | -5.08 |
| IPI00289501 | Neurosecretory protein VGF precursor | K.LHLPADDVVSIIIEVEE.K                       | 2 | 4.79 | 0.44 | -8.31 |
| IPI00289501 | Neurosecretory protein VGF precursor | K.LHLPADDVVSIIIEVEE.K                       | 3 | 3.67 | 0.31 | -1.97 |
| IPI00289501 | Neurosecretory protein VGF precursor | K.LHLPADDVVSIIIEVEEK.R                      | 3 | 3.95 | 0.31 | -4.91 |
| IPI00289501 | Neurosecretory protein VGF precursor | K.RQQETAAAETETR.T                           | 2 | 3.93 | 0.33 | -2.09 |
| IPI00289501 | Neurosecretory protein VGF precursor | K.THLGEALAPLSK.A                            | 1 | 3.32 | 0.34 | -3.16 |
| IPI00289501 | Neurosecretory protein VGF precursor | K.THLGEALAPLSK.A                            | 2 | 3.55 | 0.48 | -2.99 |
| IPI00289501 | Neurosecretory protein VGF precursor | K.THLGEALAPLSK.A                            | 3 | 3.56 | 0.08 | -4.04 |
| IPI00289501 | Neurosecretory protein VGF precursor | K.THLGEALAPLSK.A.Y                          | 2 | 3.28 | 0.43 | -3.50 |
| IPI00289501 | Neurosecretory protein VGF precursor | L.ADLASDLLLQYLLQGGAR.Q                      | 3 | 5.32 | 0.37 | -4.14 |
| IPI00289501 | Neurosecretory protein VGF precursor | L.ASDLLLQYLLQGGAR.Q                         | 2 | 4.86 | 0.34 | -3.64 |
| IPI00289501 | Neurosecretory protein VGF precursor | L.DRPASPPAPSGSQGGPEEEAAEALLTETVR.S          | 3 | 5.88 | 0.49 | -4.28 |
| IPI00289501 | Neurosecretory protein VGF precursor | L.LQALDRPASPPAPSGSQGGPEEEAAEALLTETVR.S      | 3 | 5.38 | 0.55 | -4.09 |
| IPI00289501 | Neurosecretory protein VGF precursor | L.SKAYQGVAAFPFK.A                           | 2 | 4.07 | 0.39 | -3.01 |
| IPI00289501 | Neurosecretory protein VGF precursor | N.GPEASDPSEEEALASLLQELR.D                   | 2 | 5.41 | 0.53 | -5.31 |
| IPI00289501 | Neurosecretory protein VGF precursor | N.GPEASDPSEEEALASLLQELR.D                   | 3 | 4.09 | 0.30 | -5.25 |



|             |                                      |                                               |   |      |      |       |
|-------------|--------------------------------------|-----------------------------------------------|---|------|------|-------|
| IPI00289501 | Neurosecretory protein VGF precursor | N.SEPQDEGELFQGVDP.R.A                         | 2 | 4.65 | 0.35 | -5.02 |
| IPI00289501 | Neurosecretory protein VGF precursor | N.SEPQDEGELFQGVDP.R.A                         | 3 | 3.82 | 0.35 | -3.16 |
| IPI00289501 | Neurosecretory protein VGF precursor | P.DSGPLPETHKFGEGVSSPK.T                       | 2 | 3.82 | 0.49 | -3.92 |
| IPI00289501 | Neurosecretory protein VGF precursor | P.EASDPSEEEALASLLQELR.D                       | 2 | 4.94 | 0.43 | -2.85 |
| IPI00289501 | Neurosecretory protein VGF precursor | P.ERAPLPPPAPSQFQAR.M                          | 3 | 4.67 | 0.33 | -2.23 |
| IPI00289501 | Neurosecretory protein VGF precursor | P.ETHKFGEGVSSPK.T                             | 2 | 3.16 | 0.28 | -3.92 |
| IPI00289501 | Neurosecretory protein VGF precursor | P.GRPEAQPPPLSSEHKEPVAGDAVPGPK.D               | 2 | 4.22 | 0.51 | -3.59 |
| IPI00289501 | Neurosecretory protein VGF precursor | P.GRPEAQPPPLSSEHKEPVAGDAVPGPK.D               | 3 | 5.49 | 0.44 | -4.07 |
| IPI00289501 | Neurosecretory protein VGF precursor | P.GRPEAQPPPLSSEHKEPVAGDAVPGPK.D               | 4 | 6.54 | 0.53 | -3.66 |
| IPI00289501 | Neurosecretory protein VGF precursor | P.GRPEAQPPPLSSEHKEPVAGDAVPGPKDGSAP.EVR.G      | 3 | 6.80 | 0.58 | 0.47  |
| IPI00289501 | Neurosecretory protein VGF precursor | P.GRPEAQPPPLSSEHKEPVAGDAVPGPKDGSAP.EVR.G      | 4 | 5.08 | 0.51 | -2.47 |
| IPI00289501 | Neurosecretory protein VGF precursor | P.PGRPEAQPPPLSSEHKEPVAGDAVPGPK.D              | 3 | 5.89 | 0.53 | -4.37 |
| IPI00289501 | Neurosecretory protein VGF precursor | P.PGRPEAQPPPLSSEHKEPVAGDAVPGPK.D              | 4 | 6.32 | 0.51 | -3.60 |
| IPI00289501 | Neurosecretory protein VGF precursor | P.PLSSEHKEPVAGDAVPGPK.D                       | 2 | 4.44 | 0.46 | -2.70 |
| IPI00289501 | Neurosecretory protein VGF precursor | P.PLSSEHKEPVAGDAVPGPK.D                       | 2 | 4.43 | 0.51 | -3.12 |
| IPI00289501 | Neurosecretory protein VGF precursor | P.PLSSEHKEPVAGDAVPGPK.D                       | 3 | 4.50 | 0.29 | -2.42 |
| IPI00289501 | Neurosecretory protein VGF precursor | Q.ALDRPASPAPSGSQQGPEEEAAEALLTET.VR.S          | 3 | 6.00 | 0.54 | -3.02 |
| IPI00289501 | Neurosecretory protein VGF precursor | Q.ARVPERAPLPPPAPSQFQAR.M                      | 3 | 4.85 | 0.36 | -4.04 |
| IPI00289501 | Neurosecretory protein VGF precursor | Q.DEGELFQGVDP.R.A                             | 2 | 3.61 | 0.27 | -2.97 |
| IPI00289501 | Neurosecretory protein VGF precursor | Q.TPENGPEASDPSEEEALASLLQELR.D                 | 3 | 3.81 | 0.26 | -2.64 |
| IPI00289501 | Neurosecretory protein VGF precursor | R.AAPAPTHVR.S                                 | 1 | 1.54 | 0.15 | -3.29 |
| IPI00289501 | Neurosecretory protein VGF precursor | R.AAPAPTHVR.S                                 | 2 | 1.83 | 0.44 | -2.96 |
| IPI00289501 | Neurosecretory protein VGF precursor | R.ALAAVLLQALDR.P                              | 2 | 3.93 | 0.40 | -3.61 |
| IPI00289501 | Neurosecretory protein VGF precursor | R.ALAAVLLQALDRPASPPAPSGSQQGPEEEAAEALLTET.V    | 3 | 3.80 | 0.40 | -2.63 |
| IPI00289501 | Neurosecretory protein VGF precursor | R.ALAAVLLQALDRPASPPAPSGSQQGPEEEAAEALLTET.VR   | 3 | 6.07 | 0.58 | -4.30 |
| IPI00289501 | Neurosecretory protein VGF precursor | R.ALAAVLLQALDRPASPPAPSGSQQGPEEEAAEALLTET.VR   | 4 | 5.00 | 0.36 | -3.96 |
| IPI00289501 | Neurosecretory protein VGF precursor | R.ALAAVLLQALDRPASPPAPSGSQQGPEEEAAEALLTET.VR.S | 3 | 6.50 | 0.61 | -4.77 |
| IPI00289501 | Neurosecretory protein VGF precursor | R.ALAAVLLQALDRPASPPAPSGSQQGPEEEAAEALLTET.VR.S | 4 | 5.11 | 0.53 | -6.79 |
| IPI00289501 | Neurosecretory protein VGF precursor | R.ALAAVLLQALDRPASPPAPSGSQQGPEEEAAEALLTET.VR.S | 5 | 5.50 | 0.50 | -5.50 |
| IPI00289501 | Neurosecretory protein VGF precursor | R.ALAAVLLQALDRPASPPAPSGSQQGPEEEAAEALLTET.VR.S | 6 | 4.34 | 0.31 | -4.41 |
| IPI00289501 | Neurosecretory protein VGF precursor | R.APLPPPAPSQFQAR.M                            | 2 | 2.48 | 0.28 | -5.81 |
| IPI00289501 | Neurosecretory protein VGF precursor | R.ARQNALLFAEEEDGEAGA.E                        | 2 | 5.01 | 0.60 | -3.43 |
| IPI00289501 | Neurosecretory protein VGF precursor | R.ARQNALLFAEEEDGEAGAE.D                       | 2 | 4.24 | 0.49 | 1.05  |
| IPI00289501 | Neurosecretory protein VGF precursor | R.ARQNALLFAEEEDGEAGAED.K                      | 2 | 6.07 | 0.55 | -3.37 |
| IPI00289501 | Neurosecretory protein VGF precursor | R.ASWGEFQAR.V                                 | 2 | 2.95 | 0.27 | -2.89 |
| IPI00289501 | Neurosecretory protein VGF precursor | R.DFSPSSAKR.R                                 | 1 | 1.73 | 0.18 | -3.28 |
| IPI00289501 | Neurosecretory protein VGF precursor | R.DFSPSSAKR.Q                                 | 2 | 1.87 | 0.16 | -2.23 |
| IPI00289501 | Neurosecretory protein VGF precursor | R.ESAREEEAEQERR.G                             | 3 | 3.46 | 0.23 | -3.27 |
| IPI00289501 | Neurosecretory protein VGF precursor | R.GLQEAAEER.E                                 | 1 | 2.13 | 0.07 | -2.29 |
| IPI00289501 | Neurosecretory protein VGF precursor | R.GLQEAAEER.E                                 | 2 | 2.42 | 0.07 | -0.27 |
| IPI00289501 | Neurosecretory protein VGF precursor | R.GLQEAAEERESAREEEAEQE.R                      | 2 | 2.98 | 0.37 | -3.30 |
| IPI00289501 | Neurosecretory protein VGF precursor | R.GLQEAAEERESAREEEAEQE.R                      | 3 | 3.62 | 0.33 | 0.13  |

|             |                                                        |                                        |   |      |      |       |
|-------------|--------------------------------------------------------|----------------------------------------|---|------|------|-------|
| IPI00289501 | Neurosecretory protein VGF precursor                   | R.GLQEAAEERESAREEEEEAEQER.R            | 3 | 3.92 | 0.28 | -3.12 |
| IPI00289501 | Neurosecretory protein VGF precursor                   | R.GLQEAAEERESAREEEEEAEQERR.G           | 3 | 3.99 | 0.28 | -3.68 |
| IPI00289501 | Neurosecretory protein VGF precursor                   | R.GLQEAAEERESAREEEEEAEQERR.G           | 4 | 2.81 | 0.14 | -4.23 |
| IPI00289501 | Neurosecretory protein VGF precursor                   | R.LADLASDLLLLQYLLQGGAR.Q               | 2 | 5.69 | 0.42 | -7.37 |
| IPI00289501 | Neurosecretory protein VGF precursor                   | R.LADLASDLLLLQYLLQGGAR.Q               | 3 | 5.87 | 0.41 | -4.13 |
| IPI00289501 | Neurosecretory protein VGF precursor                   | R.LADLASDLLLLQYLLQGGAR.Q.R             | 2 | 4.47 | 0.33 | -4.21 |
| IPI00289501 | Neurosecretory protein VGF precursor                   | R.LADLASDLLLLQYLLQGGAR.Q.R             | 3 | 5.00 | 0.41 | -4.42 |
| IPI00289501 | Neurosecretory protein VGF precursor                   | R.LLQQGLAQVEAG.R                       | 2 | 3.38 | 0.25 | -3.87 |
| IPI00289501 | Neurosecretory protein VGF precursor                   | R.LLQQGLAQVEAGR.R                      | 2 | 3.90 | 0.42 | -3.05 |
| IPI00289501 | Neurosecretory protein VGF precursor                   | R.LQEQEELENYIEHVLLR.R                  | 3 | 2.77 | 0.14 | -2.56 |
| IPI00289501 | Neurosecretory protein VGF precursor                   | R.M*PDSGPLPETH.K                       | 2 | 3.26 | 0.47 | -2.56 |
| IPI00289501 | Neurosecretory protein VGF precursor                   | R.M*PDSGPLPETHK.F                      | 1 | 1.93 | 0.26 | -3.75 |
| IPI00289501 | Neurosecretory protein VGF precursor                   | R.M*PDSGPLPETHK.F                      | 2 | 3.60 | 0.35 | -3.05 |
| IPI00289501 | Neurosecretory protein VGF precursor                   | R.M*PDSGPLPETHK.F                      | 3 | 2.84 | 0.16 | -3.75 |
| IPI00289501 | Neurosecretory protein VGF precursor                   | R.M*PDSGPLPETHKFGEGVSSPK.T             | 2 | 4.21 | 0.50 | -4.75 |
| IPI00289501 | Neurosecretory protein VGF precursor                   | R.M*PDSGPLPETHKFGEGVSSPK.T             | 3 | 3.17 | 0.36 | -2.85 |
| IPI00289501 | Neurosecretory protein VGF precursor                   | R.M*PDSGPLPETHKFGEGVSSPK.T             | 4 | 2.81 | 0.23 | -2.98 |
| IPI00289501 | Neurosecretory protein VGF precursor                   | R.NSEPQDEGELFQGVDP.R.A                 | 2 | 4.47 | 0.43 | -4.88 |
| IPI00289501 | Neurosecretory protein VGF precursor                   | R.NSEPQDEGELFQGVDP.R.A                 | 3 | 4.18 | 0.42 | -4.02 |
| IPI00289501 | Neurosecretory protein VGF precursor                   | R.QAAAEERLADLASDLLLLQYLLQGGAR.Q        | 3 | 3.76 | 0.12 |       |
| IPI00289501 | Neurosecretory protein VGF precursor                   | R.QNALLFAEEEDGEAGA.E                   | 2 | 2.91 | 0.29 | -3.80 |
| IPI00289501 | Neurosecretory protein VGF precursor                   | R.QNALLFAEEEDGEAGAED.K                 | 2 | 4.73 | 0.53 | -4.03 |
| IPI00289501 | Neurosecretory protein VGF precursor                   | R.QNALLFAEEEDGEAGAEDKR.S               | 3 | 3.35 | 0.40 | -1.72 |
| IPI00289501 | Neurosecretory protein VGF precursor                   | R.QQETAATETR.T                         | 2 | 3.09 | 0.47 | -3.26 |
| IPI00289501 | Neurosecretory protein VGF precursor                   | R.RKEAEGTEEGGEEEDDEEM*DPQTIDSLIEL.S    | 3 | 4.02 | 0.38 | -4.65 |
| IPI00289501 | Neurosecretory protein VGF precursor                   | R.RKEAEGTEEGGEEEDDEEM*DPQTIDSLIELSTK.L | 3 | 5.88 | 0.58 | -5.21 |
| IPI00289501 | Neurosecretory protein VGF precursor                   | R.RKEAEGTEEGGEEEDDEEM*DPQTIDSLIELSTK.L | 4 | 4.87 | 0.45 | -5.08 |
| IPI00289501 | Neurosecretory protein VGF precursor                   | R.RLQEQEELENYIEHVLLR.R                 | 3 | 5.85 | 0.40 | -4.66 |
| IPI00289501 | Neurosecretory protein VGF precursor                   | R.RLQEQEELENYIEHVLLR.R                 | 4 | 5.49 | 0.34 | -3.42 |
| IPI00289501 | Neurosecretory protein VGF precursor                   | R.VNLESPGPER.V                         | 1 | 1.92 | 0.26 | -2.69 |
| IPI00289501 | Neurosecretory protein VGF precursor                   | R.VNLESPGPER.V                         | 2 | 3.05 | 0.24 | -1.99 |
| IPI00289501 | Neurosecretory protein VGF precursor                   | R.VNLESPGPERVW.R                       | 2 | 4.06 | 0.49 | -2.74 |
| IPI00289501 | Neurosecretory protein VGF precursor                   | R.VPERAPLPPPAPSQFQA.R                  | 2 | 3.21 | 0.33 | -2.34 |
| IPI00289501 | Neurosecretory protein VGF precursor                   | R.VPERAPLPPPAPSQFQAR.M                 | 2 | 3.86 | 0.46 | -3.44 |
| IPI00289501 | Neurosecretory protein VGF precursor                   | R.VPERAPLPPPAPSQFQAR.M                 | 3 | 4.17 | 0.36 | -3.59 |
| IPI00289501 | Neurosecretory protein VGF precursor                   | S.EPQDEGELFQGVDP.R.A                   | 2 | 3.48 | 0.43 | -3.86 |
| IPI00289746 | Isoform 2 of Serine/threonine-protein kinase PAK 1     | R.DVATSPISPTENNTTPPDALTR.N             | 2 | 2.96 | 0.29 | -1.24 |
| IPI00289746 | Isoform 2 of Serine/threonine-protein kinase PAK 1     | R.NTSTM*IGAGSK.D                       | 2 | 2.21 | 0.32 | -1.30 |
| IPI00289802 | Isoform 1 of CUB and sushi domain-containing protein 2 | R.GFSAQYQVK.K                          | 2 | 2.12 | 0.30 | -0.42 |

|             |                                                                        |                             |   |      |      |       |
|-------------|------------------------------------------------------------------------|-----------------------------|---|------|------|-------|
| IPI00289802 | Isoform 1 of CUB and sushi domain-containing protein 2                 | R.LHFTSDGNHR.Q              | 2 | 2.08 | 0.26 | -2.81 |
| IPI00289819 | Cation-independent mannose-6-phosphate receptor precursor              | K.DGAGNSFDLSSLSR.Y          | 2 | 4.53 | 0.45 | -2.17 |
| IPI00289819 | Cation-independent mannose-6-phosphate receptor precursor              | K.FLHQDIDSGQGIR.N           | 3 | 2.80 | 0.16 | -2.35 |
| IPI00289819 | Cation-independent mannose-6-phosphate receptor precursor              | K.LSGAYLVDDSDPDTSLFINVCR.D  | 2 | 5.30 | 0.57 | -6.21 |
| IPI00289819 | Cation-independent mannose-6-phosphate receptor precursor              | K.LSGAYLVDDSDPDTSLFINVCR.D  | 3 | 2.95 | 0.09 | -4.81 |
| IPI00289819 | Cation-independent mannose-6-phosphate receptor precursor              | K.LSSDVCPTSDK.S             | 2 | 2.31 | 0.17 | -2.60 |
| IPI00289819 | Cation-independent mannose-6-phosphate receptor precursor              | K.LTYENGLLK.M               | 2 | 2.06 | 0.09 | -2.26 |
| IPI00289819 | Cation-independent mannose-6-phosphate receptor precursor              | K.NGAYKVETK.K               | 2 | 2.02 | 0.07 | -0.25 |
| IPI00289819 | Cation-independent mannose-6-phosphate receptor precursor              | K.RYDLSALVR.H               | 2 | 2.47 | 0.14 | -2.55 |
| IPI00289819 | Cation-independent mannose-6-phosphate receptor precursor              | K.VAGLLTQK.L                | 2 | 2.52 | 0.17 | -3.44 |
| IPI00289819 | Cation-independent mannose-6-phosphate receptor precursor              | K.VPIDGPPIDIGR.V            | 2 | 2.83 | 0.36 | -2.20 |
| IPI00289819 | Cation-independent mannose-6-phosphate receptor precursor              | R.ATLITFLCDR.D              | 2 | 2.62 | 0.17 | -2.47 |
| IPI00289819 | Cation-independent mannose-6-phosphate receptor precursor              | R.FVCNDDVYSGPLK.F           | 2 | 3.29 | 0.32 | -0.79 |
| IPI00289819 | Cation-independent mannose-6-phosphate receptor precursor              | R.TVEACPVVR.V               | 2 | 2.30 | 0.07 | -0.24 |
| IPI00289819 | Cation-independent mannose-6-phosphate receptor precursor              | R.TYHSVGDVLR.S              | 2 | 2.19 | 0.14 | 0.09  |
| IPI00289819 | Cation-independent mannose-6-phosphate receptor precursor              | R.YDLSALVR.H                | 2 | 2.78 | 0.15 | -3.88 |
| IPI00289819 | Cation-independent mannose-6-phosphate receptor precursor              | R.YSDNWEAITGTGDPEHYLINVCK.S | 3 | 3.18 | 0.31 | -2.85 |
| IPI00289819 | Cation-independent mannose-6-phosphate receptor precursor              | R.YVDQVLQLVYK.D             | 2 | 3.64 | 0.34 | -2.82 |
| IPI00289831 | Isoform PTPS of Receptor-type tyrosine-protein phosphatase S precursor | K.DFLPVDPSASNGR.I           | 2 | 2.53 | 0.31 | -3.68 |
| IPI00289831 | Isoform PTPS of Receptor-type tyrosine-protein phosphatase S precursor | K.DQIGVSGGVASFVCQATGDPKPR.V | 2 | 4.82 | 0.57 | -3.16 |
| IPI00289831 | Isoform PTPS of Receptor-type tyrosine-protein phosphatase S precursor | K.DQIGVSGGVASFVCQATGDPKPR.V | 3 | 3.04 | 0.19 | -4.16 |

|             |                                                                        |                                    |   |      |      |       |
|-------------|------------------------------------------------------------------------|------------------------------------|---|------|------|-------|
| IPI00289831 | Isoform PTPS of Receptor-type tyrosine-protein phosphatase S precursor | K.GAVLGRPTLSVQQTPEGSLLAR.W         | 3 | 4.28 | 0.35 | -2.53 |
| IPI00289831 | Isoform PTPS of Receptor-type tyrosine-protein phosphatase S precursor | K.HNVDDSLLTVGSLEDETYTVR.V          | 3 | 3.30 | 0.37 | -3.54 |
| IPI00289831 | Isoform PTPS of Receptor-type tyrosine-protein phosphatase S precursor | K.IQYNGLTLDVDGR.T                  | 2 | 4.59 | 0.47 | -1.48 |
| IPI00289831 | Isoform PTPS of Receptor-type tyrosine-protein phosphatase S precursor | K.LTVLREDQLPSGFPNIDM*GPQLK.V       | 2 | 4.50 | 0.56 | -2.21 |
| IPI00289831 | Isoform PTPS of Receptor-type tyrosine-protein phosphatase S precursor | K.LTVLREDQLPSGFPNIDM*GPQLK.V       | 3 | 5.47 | 0.40 | -2.59 |
| IPI00289831 | Isoform PTPS of Receptor-type tyrosine-protein phosphatase S precursor | K.QYGGFDNR.G                       | 2 | 1.58 | 0.14 | -2.16 |
| IPI00289831 | Isoform PTPS of Receptor-type tyrosine-protein phosphatase S precursor | K.SKSQDGPYQIKEDITTR.Y              | 3 | 3.17 | 0.32 | -1.19 |
| IPI00289831 | Isoform PTPS of Receptor-type tyrosine-protein phosphatase S precursor | K.SQDGPYQIK.E                      | 2 | 2.24 | 0.06 | -1.80 |
| IPI00289831 | Isoform PTPS of Receptor-type tyrosine-protein phosphatase S precursor | K.SQDGPYQIKEDITTR.Y                | 2 | 4.53 | 0.44 | -1.56 |
| IPI00289831 | Isoform PTPS of Receptor-type tyrosine-protein phosphatase S precursor | K.SQDGPYQIKEDITTR.Y                | 3 | 2.56 | 0.25 | -0.22 |
| IPI00289831 | Isoform PTPS of Receptor-type tyrosine-protein phosphatase S precursor | K.TQQGVPGQPM*NLR.A                 | 2 | 3.45 | 0.37 | -2.98 |
| IPI00289831 | Isoform PTPS of Receptor-type tyrosine-protein phosphatase S precursor | K.TSVLLSWEFPDNYNSPTYK.I            | 2 | 3.70 | 0.47 | -4.89 |
| IPI00289831 | Isoform PTPS of Receptor-type tyrosine-protein phosphatase S precursor | K.WM*QGAEDLTPEDDM*PVGR.N           | 2 | 6.12 | 0.56 | -2.70 |
| IPI00289831 | Isoform PTPS of Receptor-type tyrosine-protein phosphatase S precursor | K.WM*QGAEDLTPEDDM*PVGR.N           | 3 | 2.35 | 0.13 | -3.49 |
| IPI00289831 | Isoform PTPS of Receptor-type tyrosine-protein phosphatase S precursor | L.TPEDDM*PVGR.N                    | 2 | 3.04 | 0.39 | -2.61 |
| IPI00289831 | Isoform PTPS of Receptor-type tyrosine-protein phosphatase S precursor | R.EAGALGPAR.E                      | 2 | 1.70 | 0.07 | -2.63 |
| IPI00289831 | Isoform PTPS of Receptor-type tyrosine-protein phosphatase S precursor | R.ETELPAAAEPGAENALTLQGLKPDYDLQVR.A | 3 | 2.82 | 0.18 | -3.94 |
| IPI00289831 | Isoform PTPS of Receptor-type tyrosine-protein phosphatase S precursor | R.FETIEFDESAGAVLR.I                | 2 | 3.36 | 0.35 | -6.40 |
| IPI00289831 | Isoform PTPS of Receptor-type tyrosine-protein phosphatase S precursor | R.FSVLPPTFHFGDQK.Q                 | 2 | 2.73 | 0.21 | -3.01 |
| IPI00289831 | Isoform PTPS of Receptor-type tyrosine-protein phosphatase S precursor | R.FSVLPPTFHFGDQK.Q                 | 3 | 2.35 | 0.19 | -2.00 |
| IPI00289831 | Isoform PTPS of Receptor-type tyrosine-protein phosphatase S precursor | R.GGQFLTPLGSPEDM*DLEELIQDISR.L     | 2 | 3.58 | 0.38 | -1.11 |

|             |                                                                        |                                        |   |      |      |       |
|-------------|------------------------------------------------------------------------|----------------------------------------|---|------|------|-------|
| IPI00289831 | Isoform PTPS of Receptor-type tyrosine-protein phosphatase S precursor | R.GGQFLTPLGSPEDM*DLEELIQDISR.L         | 3 | 4.90 | 0.31 | -3.52 |
| IPI00289831 | Isoform PTPS of Receptor-type tyrosine-protein phosphatase S precursor | R.GYQVHYVR.M                           | 2 | 2.74 | 0.30 | -3.75 |
| IPI00289831 | Isoform PTPS of Receptor-type tyrosine-protein phosphatase S precursor | R.ITTVAHTEVGPPESSPVVVR.T               | 2 | 5.26 | 0.54 | -1.62 |
| IPI00289831 | Isoform PTPS of Receptor-type tyrosine-protein phosphatase S precursor | R.ITTVAHTEVGPPESSPVVVR.T               | 3 | 2.49 | 0.09 | -2.75 |
| IPI00289831 | Isoform PTPS of Receptor-type tyrosine-protein phosphatase S precursor | R.ITTVAHTEVGPPESSPVVVRTDEDVPSAPPR.K    | 4 | 3.70 | 0.38 | -1.77 |
| IPI00289831 | Isoform PTPS of Receptor-type tyrosine-protein phosphatase S precursor | R.SETFESTPIR.G                         | 2 | 3.01 | 0.18 | -2.92 |
| IPI00289831 | Isoform PTPS of Receptor-type tyrosine-protein phosphatase S precursor | R.SPQGLGAFTPVVR.Q                      | 2 | 4.15 | 0.47 | -3.04 |
| IPI00289831 | Isoform PTPS of Receptor-type tyrosine-protein phosphatase S precursor | R.SRGGLGEEAAEVLIPEDTPR.G               | 3 | 3.73 | 0.23 | -2.10 |
| IPI00289831 | Isoform PTPS of Receptor-type tyrosine-protein phosphatase S precursor | R.TATM*LCAASGNPDPEITWFKDFLPVDPSASNGR.I | 3 | 5.86 | 0.51 | -2.98 |
| IPI00289831 | Isoform PTPS of Receptor-type tyrosine-protein phosphatase S precursor | R.TDEDVPSAPPR.K                        | 2 | 3.12 | 0.36 | -2.97 |
| IPI00289831 | Isoform PTPS of Receptor-type tyrosine-protein phosphatase S precursor | R.TFDPTTSYVVEDLKPNTTEYAFR.L            | 2 | 5.76 | 0.46 | -5.49 |
| IPI00289831 | Isoform PTPS of Receptor-type tyrosine-protein phosphatase S precursor | R.TFDPTTSYVVEDLKPNTTEYAFR.L            | 3 | 3.05 | 0.28 | -2.97 |
| IPI00289831 | Isoform PTPS of Receptor-type tyrosine-protein phosphatase S precursor | R.TGEQAPASAPR.N                        | 2 | 3.60 | 0.38 | -2.91 |
| IPI00289831 | Isoform PTPS of Receptor-type tyrosine-protein phosphatase S precursor | R.VLAFTSVGDGPLSDPIQVK.T                | 2 | 5.71 | 0.53 | -2.41 |
| IPI00289831 | Isoform PTPS of Receptor-type tyrosine-protein phosphatase S precursor | R.VLAFTSVGDGPLSDPIQVK.T                | 3 | 6.38 | 0.50 | -2.85 |
| IPI00289831 | Isoform PTPS of Receptor-type tyrosine-protein phosphatase S precursor | R.YRPLGSEDPEPK.E                       | 3 | 2.47 | 0.05 | -2.01 |
| IPI00289831 | Isoform PTPS of Receptor-type tyrosine-protein phosphatase S precursor | R.YSIGGLSPNSEYEIWVSAVNSIGQGPPSESVVTR.T | 3 | 3.50 | 0.31 | -5.20 |
| IPI00289831 | Isoform PTPS of Receptor-type tyrosine-protein phosphatase S precursor | R.YSSPANLYVR.E                         | 1 | 1.82 | 0.13 | -3.11 |
| IPI00289831 | Isoform PTPS of Receptor-type tyrosine-protein phosphatase S precursor | R.YSSPANLYVR.E                         | 2 | 2.94 | 0.35 | -2.36 |
| IPI00289831 | Isoform PTPS of Receptor-type tyrosine-protein phosphatase S precursor | W.DSGNPDVSYVIEYK.S                     | 2 | 2.91 | 0.33 | 0.30  |
| IPI00289831 | Isoform PTPS of Receptor-type tyrosine-protein phosphatase S precursor | W.M*QGAEDLTPEDDM*PVGR.N                | 2 | 5.03 | 0.57 | -4.09 |
| IPI00289837 | Coiled-coil domain-containing protein 85A                              | K.DLEVKQEEVVKENMELK.E                  | 3 | 3.39 | 0.06 |       |

|             |                                                                         |                                      |   |      |      |       |
|-------------|-------------------------------------------------------------------------|--------------------------------------|---|------|------|-------|
| IPI00289861 | Isoform 1 of Zinc finger CCHC domain-containing protein 11              | K.VNIEAVGGKCALQNSPR.S                | 2 | 2.90 | 0.19 |       |
| IPI00289862 | Secernin-1                                                              | R.AIIESDQEQR.K                       | 2 | 3.14 | 0.33 | -4.03 |
| IPI00289862 | Secernin-1                                                              | R.SIFKPFIFVDDVK.L                    | 3 | 2.94 | 0.17 | -1.47 |
| IPI00289870 | Isoform C of Protocadherin-7 precursor                                  | R.ECDEYGHSDSCWMPVRTSPERK.K           | 3 | 2.92 | 0.15 |       |
| IPI00289870 | Isoform C of Protocadherin-7 precursor                                  | R.IDREEVNQLR.F                       | 3 | 3.45 | 0.05 | -2.82 |
| IPI00289870 | Isoform C of Protocadherin-7 precursor                                  | R.LDASEGGGGTNPGR.S                   | 2 | 4.50 | 0.46 | -3.16 |
| IPI00289870 | Isoform C of Protocadherin-7 precursor                                  | R.RLDASEGGGGTNPGR.S                  | 2 | 4.55 | 0.44 | -2.54 |
| IPI00289870 | Isoform C of Protocadherin-7 precursor                                  | R.RLDASEGGGGTNPGR.S                  | 3 | 3.98 | 0.11 |       |
| IPI00289870 | Isoform C of Protocadherin-7 precursor                                  | R.SSVFELQVADTPDGEKQPQLIVK.G          | 3 | 3.31 | 0.42 | -0.24 |
| IPI00289876 | Isoform 1 of Syntaxin-7                                                 | K.ITQCSVEIQR.T                       | 2 | 3.47 | 0.16 | -0.80 |
| IPI00289876 | Isoform 1 of Syntaxin-7                                                 | K.QQYTNQLAK.E                        | 2 | 1.98 | 0.11 | 0.19  |
| IPI00289876 | Isoform 1 of Syntaxin-7                                                 | R.TLNQLGTPQDSPELR.Q                  | 2 | 4.06 | 0.37 | -3.62 |
| IPI00289924 | Alpha-2,8-sialyltransferase 8E                                          | K.CAVVGNNGILK.K                      | 2 | 2.07 | 0.18 | -2.40 |
| IPI00289924 | Alpha-2,8-sialyltransferase 8E                                          | K.LKYEVDTSGIYHINQEIFR.M              | 3 | 2.97 | 0.23 | -4.27 |
| IPI00289924 | Alpha-2,8-sialyltransferase 8E                                          | K.TDVVTVNPSITER.F                    | 2 | 3.42 | 0.29 | -2.74 |
| IPI00289924 | Alpha-2,8-sialyltransferase 8E                                          | K.YTM*DVGVK.T                        | 2 | 2.04 | 0.14 | -2.25 |
| IPI00289924 | Alpha-2,8-sialyltransferase 8E                                          | K.YVLDDFESPAVYYFHPQYLVNVS.R.Y        | 3 | 3.99 | 0.30 | -2.57 |
| IPI00289926 | leukocyte immunoglobulin-like receptor, subfamily B, member 4 isoform 2 | K.SVTLQCQR.S                         | 2 | 3.29 | 0.30 | -0.46 |
| IPI00289926 | leukocyte immunoglobulin-like receptor, subfamily B, member 4 isoform 2 | R.FSIPSM*TEDYAGR.Y                   | 2 | 2.54 | 0.17 | -3.04 |
| IPI00289965 | Potassium voltage-gated channel subfamily C member 3                    | R.RAEPDPLPAAAMGRHGGGGGDSGKIVINVGVR.H | 3 | 3.12 | 0.07 | 3.02  |
| IPI00290078 | keratin 4                                                               | K.AQYEEIAQR.S                        | 2 | 2.37 | 0.11 | -2.21 |
| IPI00290085 | Cadherin-2 precursor                                                    | A.SGEIALCK.T                         | 1 | 2.32 | 0.22 | -1.99 |
| IPI00290085 | Cadherin-2 precursor                                                    | A.SGEIALCK.T                         | 2 | 3.57 | 0.26 | -1.93 |
| IPI00290085 | Cadherin-2 precursor                                                    | K.DVHEGQPLLNVK.F                     | 1 | 3.31 | 0.48 | -1.52 |
| IPI00290085 | Cadherin-2 precursor                                                    | K.DVHEGQPLLNVK.F                     | 2 | 3.78 | 0.50 | -2.72 |
| IPI00290085 | Cadherin-2 precursor                                                    | K.DVHEGQPLLNVK.F                     | 3 | 2.57 | 0.15 | -3.07 |
| IPI00290085 | Cadherin-2 precursor                                                    | K.ESAEVEEIVFPR.Q                     | 2 | 3.13 | 0.26 | -2.27 |
| IPI00290085 | Cadherin-2 precursor                                                    | K.ESAEVEEIVFPR.Q                     | 3 | 3.47 | 0.21 | -1.07 |
| IPI00290085 | Cadherin-2 precursor                                                    | K.FLEAGIYEVPIITDSGNPPK.S             | 2 | 4.82 | 0.56 | -3.14 |
| IPI00290085 | Cadherin-2 precursor                                                    | K.FLEAGIYEVPIITDSGNPPK.S             | 3 | 5.13 | 0.53 | -4.93 |
| IPI00290085 | Cadherin-2 precursor                                                    | K.FLIYAQDKETQEK.W                    | 2 | 4.48 | 0.37 | -2.90 |
| IPI00290085 | Cadherin-2 precursor                                                    | K.FLIYAQDKETQEK.W                    | 3 | 2.52 | 0.08 | -2.56 |
| IPI00290085 | Cadherin-2 precursor                                                    | K.IDPVNGQITTIIVLDRESPNVK.N           | 3 | 2.74 | 0.37 | -1.69 |
| IPI00290085 | Cadherin-2 precursor                                                    | K.LSLKPTLTEESVK.E                    | 2 | 2.88 | 0.30 | -2.96 |
| IPI00290085 | Cadherin-2 precursor                                                    | K.LSLKPTLTEESVK.E                    | 3 | 2.92 | 0.25 | -1.34 |
| IPI00290085 | Cadherin-2 precursor                                                    | K.LSLKPTLTEESVKESAEVEE.I             | 2 | 3.13 | 0.43 | -1.93 |
| IPI00290085 | Cadherin-2 precursor                                                    | K.LSLKPTLTEESVKESAEVEEIVFPR.Q        | 3 | 6.77 | 0.60 | -4.53 |
| IPI00290085 | Cadherin-2 precursor                                                    | K.LSLKPTLTEESVKESAEVEEIVFPR.Q        | 4 | 3.06 | 0.24 | -4.38 |

|             |                                                             |                                           |   |      |      |       |
|-------------|-------------------------------------------------------------|-------------------------------------------|---|------|------|-------|
| IPI00290085 | Cadherin-2 precursor                                        | K.LSLKPTLTEESVKESAEEIVFPR.Q               | 5 | 2.40 | 0.11 | -0.52 |
| IPI00290085 | Cadherin-2 precursor                                        | K.TGFPEDEVYSAVLSK.D                       | 2 | 5.19 | 0.56 | -4.44 |
| IPI00290085 | Cadherin-2 precursor                                        | K.TGFPEDEVYSAVLSK.D                       | 3 | 3.25 | 0.13 | -0.66 |
| IPI00290085 | Cadherin-2 precursor                                        | K.TGFPEDEVYSAVLSKDVHEGQPLLNVK.F           | 3 | 4.87 | 0.54 | -3.54 |
| IPI00290085 | Cadherin-2 precursor                                        | K.VDEEDGM*VYAVR.S                         | 2 | 3.66 | 0.37 | -3.43 |
| IPI00290085 | Cadherin-2 precursor                                        | K.VQYESSEPADFKVDEEDGM*VYAVR.S             | 2 | 4.22 | 0.57 | -3.36 |
| IPI00290085 | Cadherin-2 precursor                                        | K.VQYESSEPADFKVDEEDGM*VYAVR.S             | 3 | 3.98 | 0.50 | -3.90 |
| IPI00290085 | Cadherin-2 precursor                                        | R.FAIQTDPNSENDGLVTVVKPIDFETNR.M           | 3 | 4.38 | 0.41 | -3.12 |
| IPI00290085 | Cadherin-2 precursor                                        | R.KVQYESSEPADFKVDEEDGM*VYAVR.S            | 3 | 5.16 | 0.49 | -4.50 |
| IPI00290085 | Cadherin-2 precursor                                        | R.KVQYESSEPADFKVDEEDGM*VYAVR.S            | 4 | 3.01 | 0.25 | -3.51 |
| IPI00290085 | Cadherin-2 precursor                                        | R.M*FVLTVAAENQVPLAK.G                     | 2 | 5.02 | 0.54 | -2.30 |
| IPI00290085 | Cadherin-2 precursor                                        | R.SFPLSSEHAK.F                            | 1 | 2.37 | 0.27 | -4.27 |
| IPI00290085 | Cadherin-2 precursor                                        | R.SFPLSSEHAK.F                            | 2 | 2.61 | 0.27 | -3.07 |
| IPI00290085 | Cadherin-2 precursor                                        | R.YSVTGPADQPPTGIFIINPISGQLSVTKPLDREQIAR.F | 4 | 5.65 | 0.37 | -4.98 |
| IPI00290094 | Splicing factor, arginine/serine-rich 8                     | K.EGRYTVLAENKSDEK.K                       | 2 | 1.48 | 0.10 | -8.66 |
| IPI00290283 | mannan-binding lectin serine protease 1 isoform 2 precursor | K.APEPISTQSHSVLILFHSDNSGENR.G             | 4 | 3.04 | 0.14 | -1.53 |
| IPI00290283 | mannan-binding lectin serine protease 1 isoform 2 precursor | K.DNVEM*DTFQIECLK.D                       | 2 | 3.06 | 0.22 |       |
| IPI00290283 | mannan-binding lectin serine protease 1 isoform 2 precursor | K.DQVLVSCDTGYK.V                          | 2 | 3.81 | 0.34 | -3.52 |
| IPI00290283 | mannan-binding lectin serine protease 1 isoform 2 precursor | K.QVYGVYTK.V                              | 1 | 1.62 | 0.09 | -2.57 |
| IPI00290283 | mannan-binding lectin serine protease 1 isoform 2 precursor | K.SDFSNEER.F                              | 2 | 2.18 | 0.17 | -2.43 |
| IPI00290283 | mannan-binding lectin serine protease 1 isoform 2 precursor | K.YSCQEPYYK.M                             | 2 | 2.54 | 0.29 |       |
| IPI00290283 | mannan-binding lectin serine protease 1 isoform 2 precursor | R.AAGNECPQLQPPVHGK.I                      | 2 | 2.11 | 0.25 |       |
| IPI00290283 | mannan-binding lectin serine protease 1 isoform 2 precursor | R.APGELEHGLITFSTR.N                       | 3 | 3.37 | 0.40 | -2.15 |
| IPI00290283 | mannan-binding lectin serine protease 1 isoform 2 precursor | R.DTTVIPVSK.E                             | 1 | 2.34 | 0.18 | -4.86 |
| IPI00290283 | mannan-binding lectin serine protease 1 isoform 2 precursor | R.ETDTEQTPGQEVVLSPGSFM*SITFR.S            | 3 | 4.46 | 0.32 | -5.59 |
| IPI00290283 | mannan-binding lectin serine protease 1 isoform 2 precursor | R.NAEPGLFPWQALIVVEDTSR.V                  | 2 | 4.14 | 0.48 | -4.49 |
| IPI00290283 | mannan-binding lectin serine protease 1 isoform 2 precursor | R.NAEPGLFPWQALIVVEDTSR.V                  | 3 | 4.39 | 0.49 | -4.19 |
| IPI00290283 | mannan-binding lectin serine protease 1 isoform 2 precursor | R.TGVITSPDFPNPYPK.S                       | 2 | 3.60 | 0.27 |       |

|             |                                                             |                                           |   |      |      |       |
|-------------|-------------------------------------------------------------|-------------------------------------------|---|------|------|-------|
| IPI00290283 | mannan-binding lectin serine protease 1 isoform 2 precursor | R.TLSDVLQYVK.L                            | 2 | 3.19 | 0.36 | -3.29 |
| IPI00290292 | Rhomboid 5 homolog 1                                        | K.DWEKAPEQADLTGGALDRSELESHLM*LPLER.G      | 3 | 3.24 | 0.09 | -6.22 |
| IPI00290308 | Tribbles homolog 1                                          | K.DFGDM*HSYVRSR.K                         | 2 | 2.29 | 0.08 | -1.09 |
| IPI00290315 | Chromogranin-A precursor                                    | A.LPVNSPM*NKGDTEVM*K.C                    | 2 | 3.42 | 0.48 | -3.26 |
| IPI00290315 | Chromogranin-A precursor                                    | E.EDSLEAGLPLQVR.G                         | 2 | 4.39 | 0.38 | -4.33 |
| IPI00290315 | Chromogranin-A precursor                                    | H.SGFEDELSEVLENQSSQAEK.E                  | 2 | 6.15 | 0.52 | -2.66 |
| IPI00290315 | Chromogranin-A precursor                                    | H.SGFEDELSEVLENQSSQAEK.E                  | 3 | 5.34 | 0.39 | -3.60 |
| IPI00290315 | Chromogranin-A precursor                                    | K.AEGNNQAPGEEEEEEATNTHPPASLPSQK.Y         | 3 | 2.95 | 0.33 | -6.28 |
| IPI00290315 | Chromogranin-A precursor                                    | K.AEGNNQAPGEEEEEEATNTHPPASLPSQK.Y         | 4 | 4.72 | 0.32 | -4.44 |
| IPI00290315 | Chromogranin-A precursor                                    | K.CIVEVISDTLSKPSPM*PVSQECFETLR.G          | 3 | 3.31 | 0.20 |       |
| IPI00290315 | Chromogranin-A precursor                                    | K.EAEKSGEATDGARPQALPEPM*QESK.A            | 2 | 3.59 | 0.48 | -2.83 |
| IPI00290315 | Chromogranin-A precursor                                    | K.EAEKSGEATDGARPQALPEPM*QESK.A            | 3 | 3.61 | 0.43 | -3.04 |
| IPI00290315 | Chromogranin-A precursor                                    | K.EAVEEPSSKDVM*.E                         | 2 | 3.22 | 0.38 | -3.22 |
| IPI00290315 | Chromogranin-A precursor                                    | K.EAVEEPSSKDVM*.E.K                       | 1 | 2.63 | 0.40 | -2.55 |
| IPI00290315 | Chromogranin-A precursor                                    | K.EAVEEPSSKDVM*.E.K                       | 2 | 3.58 | 0.40 | -4.59 |
| IPI00290315 | Chromogranin-A precursor                                    | K.EEEEEEM*AVVPQGLFR.G                     | 2 | 3.42 | 0.31 | -3.25 |
| IPI00290315 | Chromogranin-A precursor                                    | K.EEEGSANRRPEDQELESLSAIEAELEK.V           | 3 | 3.75 | 0.31 | -3.04 |
| IPI00290315 | Chromogranin-A precursor                                    | K.EEEGSANRRPEDQELESLSAIEAELEK.V           | 4 | 3.22 | 0.13 | -1.67 |
| IPI00290315 | Chromogranin-A precursor                                    | K.EEEGSANRRPEDQELESLSAIEAELEKVAHQALR.R    | 5 | 4.19 | 0.17 | -4.05 |
| IPI00290315 | Chromogranin-A precursor                                    | K.ELQDLALQGAK.E                           | 1 | 3.29 | 0.19 | -3.12 |
| IPI00290315 | Chromogranin-A precursor                                    | K.ELQDLALQGAK.E                           | 2 | 3.54 | 0.29 | -3.30 |
| IPI00290315 | Chromogranin-A precursor                                    | K.GEQEHSQQKEEEEEEM*AVVPQGLFR.G            | 2 | 4.69 | 0.59 | -4.49 |
| IPI00290315 | Chromogranin-A precursor                                    | K.GEQEHSQQKEEEEEEM*AVVPQGLFR.G            | 3 | 5.01 | 0.51 | -4.70 |
| IPI00290315 | Chromogranin-A precursor                                    | K.GEQEHSQQKEEEEEEM*AVVPQGLFR.G            | 4 | 3.13 | 0.29 | -3.81 |
| IPI00290315 | Chromogranin-A precursor                                    | K.GLSAEPGWQAK.R                           | 1 | 2.67 | 0.25 | -2.98 |
| IPI00290315 | Chromogranin-A precursor                                    | K.HSGFEDELSEVLENQSSQAEK.E                 | 2 | 6.60 | 0.50 | -3.03 |
| IPI00290315 | Chromogranin-A precursor                                    | K.HSGFEDELSEVLENQSSQAEK.E                 | 3 | 5.95 | 0.38 | -3.79 |
| IPI00290315 | Chromogranin-A precursor                                    | K.HSGFEDELSEVLENQSSQAEK.EAVEEPSSK.D       | 3 | 6.45 | 0.56 | -5.25 |
| IPI00290315 | Chromogranin-A precursor                                    | K.HSGFEDELSEVLENQSSQAEK.EAVEEPSSK.D       | 4 | 5.25 | 0.37 | -4.93 |
| IPI00290315 | Chromogranin-A precursor                                    | K.HSGFEDELSEVLENQSSQAEK.EAVEEPSSKDVM*.E.K | 3 | 6.01 | 0.58 | -2.78 |
| IPI00290315 | Chromogranin-A precursor                                    | K.KEEEGSANRRPEDQELESLSAIEAELEK.V          | 3 | 5.27 | 0.47 | -3.84 |
| IPI00290315 | Chromogranin-A precursor                                    | K.KEEEGSANRRPEDQELESLSAIEAELEK.V          | 4 | 4.53 | 0.37 | -4.60 |
| IPI00290315 | Chromogranin-A precursor                                    | K.KEEEGSANRRPEDQELESLSAIEAELEK.V          | 5 | 3.67 | 0.27 | -2.51 |
| IPI00290315 | Chromogranin-A precursor                                    | K.KEEEGSANRRPEDQELESLSAIEAELEKVAHQ.L      | 4 | 4.97 | 0.41 | -5.09 |
| IPI00290315 | Chromogranin-A precursor                                    | K.KEEEGSANRRPEDQELESLSAIEAELEKVAHQALR.R   | 3 | 3.61 | 0.16 | -4.82 |
| IPI00290315 | Chromogranin-A precursor                                    | K.KEEEGSANRRPEDQELESLSAIEAELEKVAHQALR.R   | 4 | 3.02 | 0.13 | -4.47 |
| IPI00290315 | Chromogranin-A precursor                                    | K.KEEEGSANRRPEDQELESLSAIEAELEKVAHQALR.R   | 5 | 4.99 | 0.32 | -2.47 |
| IPI00290315 | Chromogranin-A precursor                                    | K.KEEEGSANRRPEDQELESLSAIEAELEKVAHQALR.R   | 6 | 3.57 | 0.25 | -2.47 |
| IPI00290315 | Chromogranin-A precursor                                    | K.RLEGQEEEEEDNRDSSM*K.L                   | 3 | 2.39 | 0.08 | -4.05 |
| IPI00290315 | Chromogranin-A precursor                                    | K.SGEATDGARPQALPEPM*QESK.A                | 2 | 3.51 | 0.46 | -3.53 |
| IPI00290315 | Chromogranin-A precursor                                    | K.SGEATDGARPQALPEPM*QESK.A                | 3 | 4.60 | 0.36 | -4.64 |



|             |                          |                                         |   |      |      |       |
|-------------|--------------------------|-----------------------------------------|---|------|------|-------|
| IPI00290315 | Chromogranin-A precursor | K.SGELEQEEER.L                          | 2 | 3.67 | 0.24 | -3.63 |
| IPI00290315 | Chromogranin-A precursor | K.SGELEQEEERLSK.E                       | 2 | 3.90 | 0.24 | -0.46 |
| IPI00290315 | Chromogranin-A precursor | K.SGELEQEEERLSKEWEDS.K                  | 2 | 4.62 | 0.44 | -4.09 |
| IPI00290315 | Chromogranin-A precursor | K.SGELEQEEERLSKEWEDS.K                  | 3 | 4.71 | 0.40 | -3.58 |
| IPI00290315 | Chromogranin-A precursor | K.VAHQLQALR.R                           | 1 | 2.29 | 0.26 | -5.46 |
| IPI00290315 | Chromogranin-A precursor | K.VAHQLQALR.R                           | 2 | 3.01 | 0.34 | -4.09 |
| IPI00290315 | Chromogranin-A precursor | K.YPGPQAEGDSEGLSQGLVDR.E                | 2 | 5.85 | 0.57 | -8.17 |
| IPI00290315 | Chromogranin-A precursor | K.YPGPQAEGDSEGLSQGLVDR.E                | 3 | 4.74 | 0.37 | -3.86 |
| IPI00290315 | Chromogranin-A precursor | K.YPGPQAEGDSEGLSQGLVDREK.G              | 2 | 5.00 | 0.51 | -2.79 |
| IPI00290315 | Chromogranin-A precursor | K.YPGPQAEGDSEGLSQGLVDREK.G              | 3 | 6.83 | 0.54 | -6.01 |
| IPI00290315 | Chromogranin-A precursor | L.AVDGAGKPGAEAAQDPEGK.G                 | 2 | 2.93 | 0.27 | -2.92 |
| IPI00290315 | Chromogranin-A precursor | L.AVDGAGKPGAEAAQDPEGK.G                 | 3 | 3.85 | 0.44 | -1.17 |
| IPI00290315 | Chromogranin-A precursor | P.GPQAEGDSEGLSQGLVDR.E                  | 2 | 5.82 | 0.59 | -3.95 |
| IPI00290315 | Chromogranin-A precursor | P.GPQAEGDSEGLSQGLVDREK.G                | 2 | 4.56 | 0.58 | -2.02 |
| IPI00290315 | Chromogranin-A precursor | P.GPQAEGDSEGLSQGLVDREK.G                | 3 | 3.87 | 0.41 | -1.39 |
| IPI00290315 | Chromogranin-A precursor | R.EDSKEAEKSGEATDGARPQALPEPM*QESK.A      | 2 | 4.41 | 0.45 | -4.03 |
| IPI00290315 | Chromogranin-A precursor | R.EDSKEAEKSGEATDGARPQALPEPM*QESK.A      | 3 | 3.28 | 0.25 | -3.86 |
| IPI00290315 | Chromogranin-A precursor | R.EDSKEAEKSGEATDGARPQALPEPM*QESK.A      | 4 | 3.64 | 0.24 | -3.53 |
| IPI00290315 | Chromogranin-A precursor | R.GGKSGELEQEEER.L                       | 2 | 4.22 | 0.35 | -3.37 |
| IPI00290315 | Chromogranin-A precursor | R.GGKSGELEQEEER.L                       | 3 | 3.33 | 0.13 | -0.21 |
| IPI00290315 | Chromogranin-A precursor | R.GGKSGELEQEEERLSK.E                    | 2 | 4.79 | 0.43 | -1.88 |
| IPI00290315 | Chromogranin-A precursor | R.GGKSGELEQEEERLSK.E                    | 3 | 3.85 | 0.21 | -3.23 |
| IPI00290315 | Chromogranin-A precursor | R.GYPPEEKKEEEGSANR.R                    | 2 | 3.94 | 0.39 | -3.29 |
| IPI00290315 | Chromogranin-A precursor | R.GYPPEEKKEEEGSANRRPEDQELESLSAIEAELEK.V | 3 | 5.32 | 0.51 | -3.40 |
| IPI00290315 | Chromogranin-A precursor | R.GYPPEEKKEEEGSANRRPEDQELESLSAIEAELEK.V | 4 | 4.54 | 0.40 | -3.80 |
| IPI00290315 | Chromogranin-A precursor | R.GYPPEEKKEEEGSANRRPEDQELESLSAIEAELEK.V | 5 | 2.43 | 0.13 | -3.99 |
| IPI00290315 | Chromogranin-A precursor | R.GYPPEEKKEEEGSANRRPEDQELESLSAIEAELEK.V | 6 | 3.44 | 0.15 | -3.76 |
| IPI00290315 | Chromogranin-A precursor | R.LEGQEEEEEDNRDSSM*K.L                  | 2 | 2.84 | 0.34 | -3.05 |
| IPI00290315 | Chromogranin-A precursor | R.LEGQEEEEEDNRDSSM*K.L                  | 3 | 2.54 | 0.33 | -2.06 |
| IPI00290315 | Chromogranin-A precursor | R.LSKEWEDS.K                            | 1 | 2.29 | 0.26 | -3.09 |
| IPI00290315 | Chromogranin-A precursor | R.RPEDQELESLSAIEAELEK.V                 | 2 | 6.89 | 0.48 | -4.97 |
| IPI00290315 | Chromogranin-A precursor | R.RPEDQELESLSAIEAELEK.V                 | 3 | 4.87 | 0.40 | -3.99 |
| IPI00290315 | Chromogranin-A precursor | R.RPEDQELESLSAIEAELEKVAHQL.Q            | 3 | 3.68 | 0.38 | -5.48 |
| IPI00290315 | Chromogranin-A precursor | R.RPEDQELESLSAIEAELEKVAHQLQA.L          | 3 | 5.98 | 0.51 | -3.32 |
| IPI00290315 | Chromogranin-A precursor | R.RPEDQELESLSAIEAELEKVAHQLQALR.R        | 3 | 8.25 | 0.64 | -6.06 |
| IPI00290315 | Chromogranin-A precursor | R.RPEDQELESLSAIEAELEKVAHQLQALR.R        | 4 | 7.46 | 0.54 | -4.93 |
| IPI00290315 | Chromogranin-A precursor | R.RPEDQELESLSAIEAELEKVAHQLQALRR.G       | 5 | 2.29 | 0.17 | -1.57 |
| IPI00290315 | Chromogranin-A precursor | R.SEALAVDGAGKPGAEAAQD.P                 | 2 | 5.09 | 0.43 | -4.25 |
| IPI00290315 | Chromogranin-A precursor | R.SEALAVDGAGKPGAEAAQDPEGK.G             | 2 | 5.00 | 0.41 | -4.36 |
| IPI00290315 | Chromogranin-A precursor | R.SEALAVDGAGKPGAEAAQDPEGK.G             | 3 | 4.88 | 0.39 | -2.83 |
| IPI00290315 | Chromogranin-A precursor | R.SEALAVDGAGKPGAEAAQDPEGKGEQHSQQK.E     | 4 | 4.64 | 0.35 | -3.36 |
| IPI00290315 | Chromogranin-A precursor | S.GFEDELSEVLENQSSQAELEK.E               | 3 | 4.56 | 0.24 | -2.93 |

|             |                                                                   |                               |   |      |      |       |
|-------------|-------------------------------------------------------------------|-------------------------------|---|------|------|-------|
| IPI00290315 | Chromogranin-A precursor                                          | V.AHQLQALR.R                  | 1 | 2.01 | 0.17 | -4.63 |
| IPI00290328 | Receptor-type tyrosine-protein phosphatase eta precursor          | K.AVSISPTNVILTWK.S            | 2 | 3.13 | 0.25 | -4.54 |
| IPI00290328 | Receptor-type tyrosine-protein phosphatase eta precursor          | K.GDPLGTEGGLDASNTER.S         | 2 | 3.76 | 0.54 | -3.31 |
| IPI00290328 | Receptor-type tyrosine-protein phosphatase eta precursor          | K.TKGDPLGTEGGLDASNTER.S       | 2 | 3.83 | 0.52 | -2.59 |
| IPI00290328 | Receptor-type tyrosine-protein phosphatase eta precursor          | K.TPSSTGSPVFDIK.A             | 2 | 3.07 | 0.27 | -2.95 |
| IPI00290328 | Receptor-type tyrosine-protein phosphatase eta precursor          | K.YCFEIVPK.G                  | 2 | 2.64 | 0.27 | -1.06 |
| IPI00290328 | Receptor-type tyrosine-protein phosphatase eta precursor          | R.AGSPTAPVHDESLVGPVDPSSGQQR.D | 3 | 4.23 | 0.43 | -2.59 |
| IPI00290328 | Receptor-type tyrosine-protein phosphatase eta precursor          | R.VLLESIGSHEELTQDSR.L         | 2 | 4.40 | 0.56 | -1.66 |
| IPI00290328 | Receptor-type tyrosine-protein phosphatase eta precursor          | R.VLLESIGSHEELTQDSR.L         | 3 | 4.47 | 0.43 | -1.51 |
| IPI00290358 | Putative uncharacterized protein gs103                            | R.QVWGEVPEPSDRSEEPETPAAYR.A   | 3 | 2.95 | 0.29 | -2.66 |
| IPI00290744 | Fibronectin type-III domain-containing protein C5orf40            | R.DGAELDPEANQDAPDAGALQR.G     | 3 | 3.84 | 0.30 | 0.93  |
| IPI00290826 | Transmembrane protein 157 precursor                               | R.GLAEAAGPR.G                 | 1 | 2.54 | 0.16 | -3.71 |
| IPI00290826 | Transmembrane protein 157 precursor                               | R.GLAEAAGPR.G                 | 2 | 2.73 | 0.20 | -3.30 |
| IPI00290854 | A-kinase anchor protein 3                                         | K.SCDASLAELGDDKSGDASR.L       | 3 | 3.80 | 0.18 |       |
| IPI00290856 | Lymphatic vessel endothelial hyaluronic acid receptor 1 precursor | G.SLRAEELSIQVSCR.I            | 2 | 3.08 | 0.30 | -3.64 |
| IPI00290856 | Lymphatic vessel endothelial hyaluronic acid receptor 1 precursor | K.ANQQQLNFTEAK.E              | 2 | 3.27 | 0.30 | -1.66 |
| IPI00290856 | Lymphatic vessel endothelial hyaluronic acid receptor 1 precursor | K.DQVETALK.A                  | 1 | 1.97 | 0.11 | -2.80 |
| IPI00290856 | Lymphatic vessel endothelial hyaluronic acid receptor 1 precursor | K.DQVETALK.A                  | 2 | 2.48 | 0.11 | -2.79 |
| IPI00290856 | Lymphatic vessel endothelial hyaluronic acid receptor 1 precursor | K.KANQQQLNFTEAK.E             | 2 | 4.30 | 0.33 | -3.36 |
| IPI00290856 | Lymphatic vessel endothelial hyaluronic acid receptor 1 precursor | K.NGVGVLIWK.V                 | 2 | 3.19 | 0.27 | -1.00 |
| IPI00290856 | Lymphatic vessel endothelial hyaluronic acid receptor 1 precursor | R.IM*GITLVSK.K                | 2 | 2.66 | 0.18 | -2.68 |
| IPI00290856 | Lymphatic vessel endothelial hyaluronic acid receptor 1 precursor | R.IMGITLVSK.K                 | 2 | 2.64 | 0.21 | -1.76 |
| IPI00290856 | Lymphatic vessel endothelial hyaluronic acid receptor 1 precursor | R.LLGLSLAGK.D                 | 1 | 1.75 | 0.20 | -3.92 |

|             |                                                                   |                                         |   |      |      |       |
|-------------|-------------------------------------------------------------------|-----------------------------------------|---|------|------|-------|
| IPI00290856 | Lymphatic vessel endothelial hyaluronic acid receptor 1 precursor | R.LLGLSLAGK.D                           | 2 | 2.93 | 0.20 | -3.35 |
| IPI00290856 | Lymphatic vessel endothelial hyaluronic acid receptor 1 precursor | R.LLGLSLAGKDQVETALK.A                   | 2 | 4.97 | 0.50 | -3.70 |
| IPI00290856 | Lymphatic vessel endothelial hyaluronic acid receptor 1 precursor | R.LLGLSLAGKDQVETALK.A                   | 3 | 4.23 | 0.44 | -2.32 |
| IPI00290857 | Keratin, type II cytoskeletal 3                                   | K.KYEDEINKR.T                           | 2 | 3.00 | 0.17 | -1.46 |
| IPI00291005 | Malate dehydrogenase, cytoplasmic                                 | K.DLDVAILVGSMPR.R                       | 2 | 2.83 | 0.37 | -2.88 |
| IPI00291005 | Malate dehydrogenase, cytoplasmic                                 | K.ELTEEKESAFEF.L                        | 2 | 3.65 | 0.44 | -5.48 |
| IPI00291005 | Malate dehydrogenase, cytoplasmic                                 | K.ELTEEKESAFEF.LS                       | 2 | 3.10 | 0.36 | -4.76 |
| IPI00291005 | Malate dehydrogenase, cytoplasmic                                 | K.ELTEEKESAFEF.LSSA.-                   | 2 | 3.21 | 0.37 | -5.84 |
| IPI00291005 | Malate dehydrogenase, cytoplasmic                                 | K.ENFSC.LTR.L                           | 2 | 2.12 | 0.12 | -1.56 |
| IPI00291005 | Malate dehydrogenase, cytoplasmic                                 | K.EVGVEALKDDSWLK.G                      | 2 | 4.52 | 0.42 | -2.74 |
| IPI00291005 | Malate dehydrogenase, cytoplasmic                                 | K.FVEGLPINDFSR.E                        | 1 | 2.29 | 0.32 | -2.57 |
| IPI00291005 | Malate dehydrogenase, cytoplasmic                                 | K.FVEGLPINDFSR.E                        | 2 | 3.43 | 0.33 | -3.83 |
| IPI00291005 | Malate dehydrogenase, cytoplasmic                                 | K.GEFVTTVQQR.G                          | 1 | 2.40 | 0.35 | -4.35 |
| IPI00291005 | Malate dehydrogenase, cytoplasmic                                 | K.GEFVTTVQQR.G                          | 2 | 3.68 | 0.29 | -2.93 |
| IPI00291005 | Malate dehydrogenase, cytoplasmic                                 | K.LGVTANDVK.N                           | 1 | 2.16 | 0.27 | -3.17 |
| IPI00291005 | Malate dehydrogenase, cytoplasmic                                 | K.LGVTANDVK.N                           | 2 | 3.14 | 0.35 | -3.06 |
| IPI00291005 | Malate dehydrogenase, cytoplasmic                                 | K.NVIIWGNHSSTQYDPVNHAK.V                | 3 | 3.45 | 0.28 | -6.16 |
| IPI00291005 | Malate dehydrogenase, cytoplasmic                                 | K.SQGAALDKYAK.K                         | 1 | 3.25 | 0.30 | -2.79 |
| IPI00291005 | Malate dehydrogenase, cytoplasmic                                 | K.SQGAALDKYAK.K                         | 2 | 3.53 | 0.40 | -1.57 |
| IPI00291005 | Malate dehydrogenase, cytoplasmic                                 | K.VIVVGNPANTNCLTASK.S                   | 2 | 4.40 | 0.48 | -3.18 |
| IPI00291005 | Malate dehydrogenase, cytoplasmic                                 | R.EKM*DLTAK.E                           | 2 | 1.11 | 0.23 | -3.46 |
| IPI00291005 | Malate dehydrogenase, cytoplasmic                                 | W.GNHSSTQYDPVNHAK.V                     | 2 | 4.28 | 0.53 | -4.12 |
| IPI00291006 | Malate dehydrogenase, mitochondrial precursor                     | K.AGAGSATLSM*AYAGAR.F                   | 2 | 4.71 | 0.50 | -0.98 |
| IPI00291006 | Malate dehydrogenase, mitochondrial precursor                     | K.GYLGPEQLPDCLKGCDVVIPAGVPR.K           | 3 | 4.11 | 0.30 | -0.08 |
| IPI00291006 | Malate dehydrogenase, mitochondrial precursor                     | R.ANTFVAELK.G                           | 2 | 2.16 | 0.07 | -0.33 |
| IPI00291006 | Malate dehydrogenase, mitochondrial precursor                     | R.FVFSLVDM*NGK.E                        | 2 | 3.88 | 0.43 | -3.92 |
| IPI00291006 | Malate dehydrogenase, mitochondrial precursor                     | R.LTLYDIAHTPGVAADLSHIETK.A              | 3 | 5.23 | 0.43 | -2.54 |
| IPI00291136 | Collagen alpha-1(VI) chain precursor                              | G.DEGNPGPDGAPGER.G                      | 2 | 3.03 | 0.35 | -3.29 |
| IPI00291136 | Collagen alpha-1(VI) chain precursor                              | K.CPDYTCPITFSSPADITILLDGSASVGSNFDTTKR.F | 4 | 5.07 | 0.46 | -2.46 |
| IPI00291136 | Collagen alpha-1(VI) chain precursor                              | K.DVFDIFPGSDQLNVISCQGLAPSQGRPGLSLVK.E   | 3 | 4.02 | 0.36 | -2.83 |
| IPI00291136 | Collagen alpha-1(VI) chain precursor                              | K.FEPGQSYAGVVQYSHSQM*QEHVSLR.S          | 3 | 1.49 | 0.14 | -4.75 |
| IPI00291136 | Collagen alpha-1(VI) chain precursor                              | K.GDEGEAGDPGDDNNDIAPR.G                 | 2 | 4.11 | 0.53 | -3.09 |
| IPI00291136 | Collagen alpha-1(VI) chain precursor                              | K.GLEQLLVGGSHLK.E                       | 2 | 3.71 | 0.23 | -2.33 |
| IPI00291136 | Collagen alpha-1(VI) chain precursor                              | K.GLEQLLVGGSHLKENK.Y                    | 2 | 4.04 | 0.36 | -4.04 |
| IPI00291136 | Collagen alpha-1(VI) chain precursor                              | K.GLEQLLVGGSHLKENK.Y                    | 3 | 4.08 | 0.39 | -1.85 |
| IPI00291136 | Collagen alpha-1(VI) chain precursor                              | K.GTYTDCAIK.K                           | 1 | 1.43 | 0.17 | -3.71 |
| IPI00291136 | Collagen alpha-1(VI) chain precursor                              | K.GTYTDCAIK.K                           | 2 | 2.13 | 0.12 | -0.18 |
| IPI00291136 | Collagen alpha-1(VI) chain precursor                              | K.GYRGDEGPPGSEGAR.G                     | 2 | 3.97 | 0.36 | -4.11 |
| IPI00291136 | Collagen alpha-1(VI) chain precursor                              | K.KGLEQLLVGGSHLK.E                      | 2 | 3.64 | 0.46 | -2.90 |

|             |                                      |                                        |   |      |      |       |
|-------------|--------------------------------------|----------------------------------------|---|------|------|-------|
| IPI00291136 | Collagen alpha-1(VI) chain precursor | K.KGLEQLLVGGSHLK.E                     | 3 | 3.11 | 0.13 | -2.25 |
| IPI00291136 | Collagen alpha-1(VI) chain precursor | K.RLLFSDGNSQGATPAAIEK.A                | 3 | 4.07 | 0.35 | -2.57 |
| IPI00291136 | Collagen alpha-1(VI) chain precursor | K.SLQWM*AGGTFTGEALQYTR.D               | 2 | 6.60 | 0.60 | -5.67 |
| IPI00291136 | Collagen alpha-1(VI) chain precursor | K.SLQWM*AGGTFTGEALQYTR.D               | 3 | 4.82 | 0.47 | -3.76 |
| IPI00291136 | Collagen alpha-1(VI) chain precursor | K.TAEYDVAYGESHLFR.V                    | 2 | 4.99 | 0.54 | -2.98 |
| IPI00291136 | Collagen alpha-1(VI) chain precursor | K.TAEYDVAYGESHLFR.V                    | 3 | 3.31 | 0.40 | -3.07 |
| IPI00291136 | Collagen alpha-1(VI) chain precursor | K.TAEYDVAYGESHLFRVPSYQALLR.G           | 3 | 3.89 | 0.38 | -3.80 |
| IPI00291136 | Collagen alpha-1(VI) chain precursor | K.TAEYDVAYGESHLFRVPSYQALLR.G           | 4 | 2.60 | 0.29 | -3.34 |
| IPI00291136 | Collagen alpha-1(VI) chain precursor | K.VFSVAITPDHLEPR.L                     | 2 | 3.52 | 0.42 | -3.15 |
| IPI00291136 | Collagen alpha-1(VI) chain precursor | K.VFSVAITPDHLEPR.L                     | 3 | 3.09 | 0.34 | -1.70 |
| IPI00291136 | Collagen alpha-1(VI) chain precursor | K.YLIVVTDGHPLEGYKEPCGGLEDAVNEAK.H      | 3 | 5.38 | 0.43 | -2.69 |
| IPI00291136 | Collagen alpha-1(VI) chain precursor | K.YLIVVTDGHPLEGYKEPCGGLEDAVNEAK.H      | 4 | 3.57 | 0.32 | -2.84 |
| IPI00291136 | Collagen alpha-1(VI) chain precursor | R.AVAFQDCPVDLFFVLDTSSEVALR.L           | 3 | 4.36 | 0.31 | -4.30 |
| IPI00291136 | Collagen alpha-1(VI) chain precursor | R.DAEEAISQTIDTIVDM*IK.N                | 2 | 5.37 | 0.54 | -7.38 |
| IPI00291136 | Collagen alpha-1(VI) chain precursor | R.DAEEAISQTIDTIVDM*IK.N                | 3 | 5.73 | 0.44 | -3.02 |
| IPI00291136 | Collagen alpha-1(VI) chain precursor | R.DAEEAISQTIDTIVDMIK.N                 | 2 | 4.09 | 0.36 |       |
| IPI00291136 | Collagen alpha-1(VI) chain precursor | R.DALKSSVDAVK.Y                        | 2 | 2.96 | 0.16 | 1.22  |
| IPI00291136 | Collagen alpha-1(VI) chain precursor | R.DELVKFEPGQSYAGVVQYSHSQM*QEHVSLR.S    | 4 | 5.09 | 0.47 | -4.23 |
| IPI00291136 | Collagen alpha-1(VI) chain precursor | R.DQLLPPSPNNR.I                        | 1 | 1.75 | 0.07 | -2.33 |
| IPI00291136 | Collagen alpha-1(VI) chain precursor | R.DQLLPPSPNNR.I                        | 2 | 2.61 | 0.12 | -2.74 |
| IPI00291136 | Collagen alpha-1(VI) chain precursor | R.DTTPLNVLCSPGIQVVSVGIK.D              | 2 | 4.82 | 0.48 | -3.47 |
| IPI00291136 | Collagen alpha-1(VI) chain precursor | R.DTTPLNVLCSPGIQVVSVGIK.D              | 3 | 3.26 | 0.33 | -3.94 |
| IPI00291136 | Collagen alpha-1(VI) chain precursor | R.EGTVGVPDGPGEAGPIGPK.G                | 2 | 3.69 | 0.45 | -4.97 |
| IPI00291136 | Collagen alpha-1(VI) chain precursor | R.FLTAGR.T                             | 1 | 1.75 | 0.15 | -3.48 |
| IPI00291136 | Collagen alpha-1(VI) chain precursor | R.FLTAGRTPAHDVR.V                      | 2 | 2.57 | 0.11 | -1.25 |
| IPI00291136 | Collagen alpha-1(VI) chain precursor | R.FYREASSGAAK.K                        | 2 | 3.82 | 0.33 | -2.44 |
| IPI00291136 | Collagen alpha-1(VI) chain precursor | R.GDEGPPGSEGAR.G                       | 2 | 2.87 | 0.27 | -1.87 |
| IPI00291136 | Collagen alpha-1(VI) chain precursor | R.GDPGEAGPQGDQGR.E                     | 2 | 3.76 | 0.42 | -3.44 |
| IPI00291136 | Collagen alpha-1(VI) chain precursor | R.GDPGFEGER.G                          | 2 | 2.32 | 0.13 | -3.52 |
| IPI00291136 | Collagen alpha-1(VI) chain precursor | R.GIDGVDGVK.G                          | 2 | 2.50 | 0.24 | -2.89 |
| IPI00291136 | Collagen alpha-1(VI) chain precursor | R.GPPGLRGDPGFEGER.G                    | 3 | 2.50 | 0.15 | -1.90 |
| IPI00291136 | Collagen alpha-1(VI) chain precursor | R.GVFHQTVSR.K                          | 1 | 2.47 | 0.17 | -3.17 |
| IPI00291136 | Collagen alpha-1(VI) chain precursor | R.GVFHQTVSR.K                          | 2 | 2.86 | 0.20 | -2.68 |
| IPI00291136 | Collagen alpha-1(VI) chain precursor | R.IALVITDGR.S                          | 2 | 3.32 | 0.24 | -4.15 |
| IPI00291136 | Collagen alpha-1(VI) chain precursor | R.LKPYGALVDK.V                         | 2 | 1.86 | 0.08 | -2.62 |
| IPI00291136 | Collagen alpha-1(VI) chain precursor | R.LLLFSDGNSQGATPAAIEK.A                | 2 | 6.30 | 0.54 | -4.01 |
| IPI00291136 | Collagen alpha-1(VI) chain precursor | R.LLLFSDGNSQGATPAAIEKAVQEAQR.A         | 3 | 4.63 | 0.47 | -3.04 |
| IPI00291136 | Collagen alpha-1(VI) chain precursor | R.LSIIATDHTYR.R                        | 1 | 2.84 | 0.36 | -2.75 |
| IPI00291136 | Collagen alpha-1(VI) chain precursor | R.LSIIATDHTYR.R                        | 2 | 3.21 | 0.32 | -3.13 |
| IPI00291136 | Collagen alpha-1(VI) chain precursor | R.LSRDELVKFEPGQSYAGVVQY.S              | 3 | 3.53 | 0.38 | -3.29 |
| IPI00291136 | Collagen alpha-1(VI) chain precursor | R.LSRDELVKFEPGQSYAGVVQYSHSQM*QEHVSLR.S | 5 | 4.33 | 0.27 | -2.31 |
| IPI00291136 | Collagen alpha-1(VI) chain precursor | R.M*PGGRDALK.S                         | 2 | 2.36 | 0.08 | -0.59 |

|             |                                      |                                          |   |      |      |       |
|-------------|--------------------------------------|------------------------------------------|---|------|------|-------|
| IPI00291136 | Collagen alpha-1(VI) chain precursor | R.NLVWNAGALHYSDEVEIIQGLTR.M              | 3 | 4.01 | 0.22 | -1.88 |
| IPI00291136 | Collagen alpha-1(VI) chain precursor | R.NVQELKEAIK.S                           | 2 | 2.59 | 0.17 | -1.68 |
| IPI00291136 | Collagen alpha-1(VI) chain precursor | R.SDTQRDTPPLNVLCSPGIQVVSVGIK.D           | 3 | 5.85 | 0.46 | -1.11 |
| IPI00291136 | Collagen alpha-1(VI) chain precursor | R.TDPAHDV.R.V                            | 2 | 2.00 | 0.22 | -1.86 |
| IPI00291136 | Collagen alpha-1(VI) chain precursor | R.TDPAHDV.R.VAVVQYSGTGQQRPER.A           | 4 | 2.55 | 0.27 | -4.19 |
| IPI00291136 | Collagen alpha-1(VI) chain precursor | R.VAVVQYSGTGQQRPER.A                     | 2 | 3.06 | 0.23 | -3.56 |
| IPI00291136 | Collagen alpha-1(VI) chain precursor | R.VAVVQYSGTGQQRPER.A                     | 3 | 2.55 | 0.29 | -2.38 |
| IPI00291136 | Collagen alpha-1(VI) chain precursor | R.VPSYQALLR.G                            | 2 | 3.03 | 0.30 | -2.28 |
| IPI00291175 | Isoform 1 of Vinculin                | K.AGEVINQPM*M*M*AAR.Q                    | 2 | 3.52 | 0.31 | -3.30 |
| IPI00291175 | Isoform 1 of Vinculin                | K.AIPDLTAPVAAVQAASVNLVR.V                | 2 | 4.04 | 0.44 | -3.91 |
| IPI00291175 | Isoform 1 of Vinculin                | K.M*SAEINEIIR.V                          | 2 | 3.11 | 0.24 | -1.96 |
| IPI00291175 | Isoform 1 of Vinculin                | K.MSAEINEIIR.V                           | 2 | 3.29 | 0.20 | -2.21 |
| IPI00291175 | Isoform 1 of Vinculin                | K.RDM*PPAFIKVENACTKLVQAAQMLQSDPYSV.PAR.D | 4 | 3.01 | 0.10 | -5.13 |
| IPI00291175 | Isoform 1 of Vinculin                | R.DPSASPGDAGEQAIR.Q                      | 2 | 2.58 | 0.21 | -1.26 |
| IPI00291175 | Isoform 1 of Vinculin                | R.DYLIDGSR.G                             | 2 | 2.38 | 0.20 | -2.65 |
| IPI00291175 | Isoform 1 of Vinculin                | R.GILSGTSDLLTFDEAEVR.K                   | 2 | 4.54 | 0.41 | -6.51 |
| IPI00291175 | Isoform 1 of Vinculin                | R.GQGSSPVAM*QK.A                         | 2 | 2.46 | 0.22 | -2.70 |
| IPI00291262 | Clusterin precursor                  | A.SHTSDSDVPSGVTEVVVK.L                   | 2 | 5.22 | 0.58 | -3.45 |
| IPI00291262 | Clusterin precursor                  | D.NELQEM*SNQGSK.Y                        | 2 | 3.97 | 0.34 | -3.14 |
| IPI00291262 | Clusterin precursor                  | D.PITVTPVEVSR.K                          | 2 | 3.80 | 0.44 | -2.99 |
| IPI00291262 | Clusterin precursor                  | D.SDPITVTPVEVSR.K                        | 2 | 3.36 | 0.34 | -5.82 |
| IPI00291262 | Clusterin precursor                  | F.DSDPITVTPVEVSR.K                       | 2 | 4.26 | 0.47 | -4.28 |
| IPI00291262 | Clusterin precursor                  | F.FTREPQDTHYLPFSLPHR.R                   | 3 | 4.60 | 0.33 | -3.81 |
| IPI00291262 | Clusterin precursor                  | G.DQTVSDNELQEM*SNQGSK.Y                  | 2 | 5.96 | 0.60 | -4.66 |
| IPI00291262 | Clusterin precursor                  | G.DQTVSDNELQEM*SNQGSK.Y                  | 3 | 5.52 | 0.50 | -2.45 |
| IPI00291262 | Clusterin precursor                  | G.DQTVSDNELQEMSNQGSK.Y                   | 2 | 5.47 | 0.46 |       |
| IPI00291262 | Clusterin precursor                  | G.DQTVSDNELQEMSNQGSK.Y                   | 3 | 4.38 | 0.37 | -0.03 |
| IPI00291262 | Clusterin precursor                  | H.TSDSDVPSGVTEVVVK.L                     | 2 | 3.65 | 0.31 | -3.64 |
| IPI00291262 | Clusterin precursor                  | I.DELFQDRFFTR.E                          | 2 | 2.93 | 0.26 | -2.14 |
| IPI00291262 | Clusterin precursor                  | K.ALQEYR.K                               | 1 | 1.17 | 0.13 | -1.93 |
| IPI00291262 | Clusterin precursor                  | K.ALQEYRK.K                              | 2 | 2.16 | 0.11 | -1.25 |
| IPI00291262 | Clusterin precursor                  | K.CREILSVCSTNNPS.Q                       | 2 | 4.02 | 0.34 | -4.20 |
| IPI00291262 | Clusterin precursor                  | K.CREILSVCSTNNPSQAK.L                    | 2 | 5.84 | 0.50 | -4.15 |
| IPI00291262 | Clusterin precursor                  | K.CREILSVCSTNNPSQAK.L                    | 3 | 3.85 | 0.29 | -2.68 |
| IPI00291262 | Clusterin precursor                  | K.EIQNAVNGVK.Q                           | 1 | 2.61 | 0.35 | -3.54 |
| IPI00291262 | Clusterin precursor                  | K.EIQNAVNGVK.Q                           | 2 | 2.90 | 0.25 | -3.47 |
| IPI00291262 | Clusterin precursor                  | K.FM*ETVAEK.A                            | 1 | 2.56 | 0.23 | -3.55 |
| IPI00291262 | Clusterin precursor                  | K.FM*ETVAEK.A                            | 2 | 2.97 | 0.22 | -3.38 |
| IPI00291262 | Clusterin precursor                  | K.FM*ETVAEKALQEYR.K                      | 2 | 3.94 | 0.38 |       |
| IPI00291262 | Clusterin precursor                  | K.FM*ETVAEKALQEYR.K                      | 3 | 3.73 | 0.42 |       |
| IPI00291262 | Clusterin precursor                  | K.FMETVAEK.A                             | 1 | 2.45 | 0.15 |       |
| IPI00291262 | Clusterin precursor                  | K.FMETVAEK.A                             | 2 | 2.27 | 0.19 | -1.13 |

|             |                     |                           |   |      |      |       |
|-------------|---------------------|---------------------------|---|------|------|-------|
| IPI00291262 | Clusterin precursor | K.KKKEDALNETR.E           | 3 | 3.03 | 0.26 |       |
| IPI00291262 | Clusterin precursor | K.LFSDPITVTVPVEV.S        | 1 | 1.95 | 0.31 | -3.48 |
| IPI00291262 | Clusterin precursor | K.LFSDPITVTVPVEV.S        | 2 | 3.50 | 0.28 | -3.24 |
| IPI00291262 | Clusterin precursor | K.LFSDPITVTVPVEVSR.K      | 1 | 2.60 | 0.30 |       |
| IPI00291262 | Clusterin precursor | K.LFSDPITVTVPVEVSR.K      | 2 | 5.98 | 0.57 | -7.61 |
| IPI00291262 | Clusterin precursor | K.LFSDPITVTVPVEVSR.K      | 3 | 4.80 | 0.34 | -4.19 |
| IPI00291262 | Clusterin precursor | K.LFSDPITVTVPVEVSRK.N     | 2 | 3.77 | 0.53 | -2.96 |
| IPI00291262 | Clusterin precursor | K.LFSDPITVTVPVEVSRK.N     | 3 | 3.10 | 0.38 | -4.82 |
| IPI00291262 | Clusterin precursor | K.TLIEKTNEER.K            | 1 | 2.68 | 0.15 |       |
| IPI00291262 | Clusterin precursor | K.TLIEKTNEER.K            | 2 | 2.82 | 0.12 | -4.34 |
| IPI00291262 | Clusterin precursor | K.TLIEKTNEERK.T           | 2 | 3.24 | 0.22 | -4.06 |
| IPI00291262 | Clusterin precursor | K.TLLSNLEEAK.K            | 1 | 2.26 | 0.07 | -2.19 |
| IPI00291262 | Clusterin precursor | K.TLLSNLEEAK.K            | 2 | 3.19 | 0.19 | -2.76 |
| IPI00291262 | Clusterin precursor | K.TLLSNLEEAKK.K           | 2 | 3.40 | 0.29 | -3.83 |
| IPI00291262 | Clusterin precursor | K.TLLSNLEEAKKK.K          | 2 | 2.94 | 0.21 | -4.41 |
| IPI00291262 | Clusterin precursor | K.YVNKEIQNA.V             | 1 | 2.07 | 0.25 | -1.37 |
| IPI00291262 | Clusterin precursor | K.YVNKEIQNAVNGVK.Q        | 2 | 5.33 | 0.47 | -3.97 |
| IPI00291262 | Clusterin precursor | K.YVNKEIQNAVNGVK.Q        | 3 | 3.70 | 0.32 | -2.12 |
| IPI00291262 | Clusterin precursor | K.YVNKEIQNAVNGVKQ.I       | 2 | 4.92 | 0.45 | -3.48 |
| IPI00291262 | Clusterin precursor | L.FSDPITVTVPVEVSR.K       | 2 | 4.83 | 0.51 | -3.84 |
| IPI00291262 | Clusterin precursor | L.FSDPITVTVPVEVSRK.N      | 2 | 3.21 | 0.43 | -3.24 |
| IPI00291262 | Clusterin precursor | L.GDQTVSDNELQEM*SNQGSK.Y  | 2 | 5.81 | 0.41 |       |
| IPI00291262 | Clusterin precursor | L.NEQFNWVSR.L             | 1 | 2.58 | 0.21 | -3.01 |
| IPI00291262 | Clusterin precursor | L.NEQFNWVSR.L             | 2 | 2.97 | 0.22 | -2.94 |
| IPI00291262 | Clusterin precursor | Q.LNEQFNWVSR.L            | 2 | 3.65 | 0.23 | -2.18 |
| IPI00291262 | Clusterin precursor | Q.TVSDNELQEM*SNQGSK.Y     | 2 | 4.56 | 0.51 | -4.13 |
| IPI00291262 | Clusterin precursor | R.ASSIIDELFQDR.F          | 1 | 3.22 | 0.34 | -2.84 |
| IPI00291262 | Clusterin precursor | R.ASSIIDELFQDR.F          | 2 | 4.22 | 0.31 | -4.42 |
| IPI00291262 | Clusterin precursor | R.ASSIIDELFQDR.F          | 3 | 3.93 | 0.20 | -1.61 |
| IPI00291262 | Clusterin precursor | R.ASSIIDELFQDRF.F         | 2 | 4.12 | 0.39 | -4.72 |
| IPI00291262 | Clusterin precursor | R.ASSIIDELFQDRFFT.R       | 2 | 3.99 | 0.40 | -3.24 |
| IPI00291262 | Clusterin precursor | R.ASSIIDELFQDRFFTR.E      | 2 | 3.05 | 0.28 | -5.43 |
| IPI00291262 | Clusterin precursor | R.ASSIIDELFQDRFFTR.E      | 3 | 3.00 | 0.31 | -5.59 |
| IPI00291262 | Clusterin precursor | R.ASSIIDELFQDRFFTREPQDT.Y | 3 | 4.37 | 0.46 | -3.20 |
| IPI00291262 | Clusterin precursor | R.EILSVCSTNNPSQAK.L       | 1 | 2.36 | 0.48 | -3.04 |
| IPI00291262 | Clusterin precursor | R.EILSVCSTNNPSQAK.L       | 2 | 4.55 | 0.54 | -4.10 |
| IPI00291262 | Clusterin precursor | R.EILSVCSTNNPSQAK.L       | 3 | 3.22 | 0.18 |       |
| IPI00291262 | Clusterin precursor | R.ELDESQVAER.L            | 1 | 2.52 | 0.38 | -3.08 |
| IPI00291262 | Clusterin precursor | R.ELDESQVAER.L            | 2 | 3.88 | 0.43 | -4.25 |
| IPI00291262 | Clusterin precursor | R.EPQDTHYHLPFSLPHR.R      | 2 | 3.20 | 0.40 | -4.31 |
| IPI00291262 | Clusterin precursor | R.EPQDTHYHLPFSLPHR.R      | 3 | 3.45 | 0.27 | -4.07 |
| IPI00291262 | Clusterin precursor | R.FFTREPQDT.Y             | 1 | 1.90 | 0.29 | -3.02 |

|             |                                                  |                                             |   |      |      |       |
|-------------|--------------------------------------------------|---------------------------------------------|---|------|------|-------|
| IPI00291262 | Clusterin precursor                              | R.FFTREPQDTYHYLPFSLPHR.R                    | 2 | 4.29 | 0.44 | -3.12 |
| IPI00291262 | Clusterin precursor                              | R.FFTREPQDTYHYLPFSLPHR.R                    | 3 | 5.19 | 0.44 | -4.07 |
| IPI00291262 | Clusterin precursor                              | R.FFTREPQDTYHYLPFSLPHR.R                    | 4 | 3.77 | 0.32 | -3.29 |
| IPI00291262 | Clusterin precursor                              | R.FFTREPQDTYHYLPFSLPHR.R                    | 5 | 2.36 | 0.12 | -2.79 |
| IPI00291262 | Clusterin precursor                              | R.IDSLLENDRQQTHM*LDVM*QDHFSR.A              | 3 | 4.36 | 0.37 | -3.80 |
| IPI00291262 | Clusterin precursor                              | R.IDSLLENDRQQTHM*LDVM*QDHFSR.A              | 4 | 4.44 | 0.43 | -2.82 |
| IPI00291262 | Clusterin precursor                              | R.KTLLSNLEEAK.K                             | 1 | 2.37 | 0.17 | -2.61 |
| IPI00291262 | Clusterin precursor                              | R.KTLLSNLEEAK.K                             | 2 | 3.64 | 0.31 | -1.90 |
| IPI00291262 | Clusterin precursor                              | R.KTLLSNLEEAK.K                             | 3 | 4.25 | 0.26 | -3.95 |
| IPI00291262 | Clusterin precursor                              | R.KTLLSNLEEAKK.K                            | 2 | 4.09 | 0.29 | -4.59 |
| IPI00291262 | Clusterin precursor                              | R.KTLLSNLEEAKK.K                            | 3 | 4.32 | 0.35 | -3.92 |
| IPI00291262 | Clusterin precursor                              | R.KTLLSNLEEAKKK.K                           | 3 | 3.78 | 0.19 |       |
| IPI00291262 | Clusterin precursor                              | R.M*KDQCDKCREILSVDCSTNNPSQAK.L              | 3 | 4.62 | 0.34 |       |
| IPI00291262 | Clusterin precursor                              | R.QQTHM*LDVM*QDHFSR.A                       | 2 | 2.14 | 0.42 | -1.98 |
| IPI00291262 | Clusterin precursor                              | R.QQTHM*LDVM*QDHFSR.A                       | 3 | 3.19 | 0.23 |       |
| IPI00291262 | Clusterin precursor                              | R.QQTHMLDVM*QDHFSR.A                        | 2 | 3.06 | 0.29 |       |
| IPI00291262 | Clusterin precursor                              | R.QQTHMLDVM*QDHFSR.A                        | 3 | 3.41 | 0.10 |       |
| IPI00291262 | Clusterin precursor                              | R.QQTHMLDVMQDHFSR.A                         | 3 | 3.79 | 0.12 |       |
| IPI00291262 | Clusterin precursor                              | R.RELDESQVAER.L                             | 1 | 2.97 | 0.26 |       |
| IPI00291262 | Clusterin precursor                              | R.RELDESQVAER.L                             | 2 | 4.16 | 0.33 | -2.41 |
| IPI00291262 | Clusterin precursor                              | R.RELDESQVAER.L                             | 3 | 3.91 | 0.12 | -0.62 |
| IPI00291262 | Clusterin precursor                              | R.SGSGLVGR.Q                                | 1 | 1.34 | 0.08 | -2.26 |
| IPI00291262 | Clusterin precursor                              | R.VTTVASHTSDSD.V                            | 2 | 3.11 | 0.44 | -2.27 |
| IPI00291262 | Clusterin precursor                              | R.VTTVASHTSDSDVPSGVTE.V                     | 2 | 3.18 | 0.40 | -3.13 |
| IPI00291262 | Clusterin precursor                              | R.VTTVASHTSDSDVPSGVTEVVVK.L                 | 2 | 6.44 | 0.58 | -4.03 |
| IPI00291262 | Clusterin precursor                              | R.VTTVASHTSDSDVPSGVTEVVVK.L                 | 3 | 4.01 | 0.25 | -4.66 |
| IPI00291262 | Clusterin precursor                              | R.VTTVASHTSDSDVPSGVTEVVVKLFDSDPITVTPVEVSR.K | 3 | 7.10 | 0.54 |       |
| IPI00291262 | Clusterin precursor                              | S.DNELQEM*SNQGSK.Y                          | 2 | 3.96 | 0.42 | -4.42 |
| IPI00291262 | Clusterin precursor                              | S.DSDVPSGVTEVVVK.L                          | 2 | 3.07 | 0.40 | -3.12 |
| IPI00291262 | Clusterin precursor                              | T.SDSDVPSGVTEVVVK.L                         | 2 | 4.18 | 0.41 | -3.87 |
| IPI00291262 | Clusterin precursor                              | T.SSLLQLNEQFNWVSR.L                         | 2 | 4.95 | 0.50 | -3.50 |
| IPI00291262 | Clusterin precursor                              | T.TVASHTSDSDVPSGVTEVVVK.L                   | 2 | 6.76 | 0.56 | -4.30 |
| IPI00291262 | Clusterin precursor                              | T.VSDNELQEM*SNQGSK.Y                        | 2 | 4.98 | 0.51 | -3.44 |
| IPI00291262 | Clusterin precursor                              | T.VSDNELQEM*SNQGSK.Y                        | 3 | 4.84 | 0.45 | -2.78 |
| IPI00291262 | Clusterin precursor                              | V.ASHTSDSDVPSGVTEVVVK.L                     | 2 | 6.03 | 0.57 | -4.02 |
| IPI00291262 | Clusterin precursor                              | V.ASHTSDSDVPSGVTEVVVK.L                     | 3 | 3.63 | 0.18 | -1.69 |
| IPI00291262 | Clusterin precursor                              | V.NKEIQNAVNGVK.Q                            | 2 | 3.36 | 0.14 | -3.12 |
| IPI00291262 | Clusterin precursor                              | V.PSGVTEVVVK.L                              | 1 | 2.33 | 0.26 | -2.08 |
| IPI00291262 | Clusterin precursor                              | V.PSGVTEVVVK.L                              | 2 | 3.56 | 0.29 | -1.36 |
| IPI00291262 | Clusterin precursor                              | V.SDNELQEM*SNQGSK.Y                         | 2 | 4.05 | 0.51 | -1.76 |
| IPI00291262 | Clusterin precursor                              | Y.VNKEIQNAVNGVK.Q                           | 2 | 3.14 | 0.17 | -3.32 |
| IPI00291395 | fibronectin leucine rich transmembrane protein 1 | K.LYLQDNAISHIPYNTLAK.M                      | 2 | 3.99 | 0.44 | -3.76 |

|             |                                                                 |                                        |   |      |      |       |
|-------------|-----------------------------------------------------------------|----------------------------------------|---|------|------|-------|
| IPI00291395 | fibronectin leucine rich transmembrane protein 1                | R.GLFDDLGNLAQLLLR.N                    | 3 | 3.13 | 0.21 | -2.79 |
| IPI00291395 | fibronectin leucine rich transmembrane protein 1                | R.GLTSIPADIPDDATTLYLQNNQINNAGIPQDLK.T  | 3 | 4.17 | 0.34 | -3.61 |
| IPI00291395 | fibronectin leucine rich transmembrane protein 1                | R.NHLSSIPSGPLPHTLEELR.L                | 3 | 3.52 | 0.41 | -2.23 |
| IPI00291463 | Radical S-adenosyl methionine domain-containing protein 2       | R.FNVEEDMTEQIK.A                       | 2 | 2.24 | 0.08 | -1.90 |
| IPI00291488 | Isoform 1 of WAP four-disulfide core domain protein 2 precursor | K.CCSAGCATFCSLPNDKEGSCPQVNINFPQLGLCR.D | 3 | 5.77 | 0.60 | -1.24 |
| IPI00291488 | Isoform 1 of WAP four-disulfide core domain protein 2 precursor | K.CCSAGCATFCSLPNDKEGSCPQVNINFPQLGLCR.D | 4 | 4.91 | 0.49 | -2.04 |
| IPI00291488 | Isoform 1 of WAP four-disulfide core domain protein 2 precursor | R.DQCQVDSQCPCGQM*K.C                   | 2 | 4.41 | 0.58 | -4.12 |
| IPI00291488 | Isoform 1 of WAP four-disulfide core domain protein 2 precursor | R.DQCQVDSQCPCGQM*K.C                   | 3 | 3.00 | 0.32 | -2.75 |
| IPI00291807 | C3 and PZP-like, alpha-2-macroglobulin domain containing 8      | A.AQPQAPGYLIAAPSVFR.A                  | 2 | 2.97 | 0.40 | -3.60 |
| IPI00291807 | C3 and PZP-like, alpha-2-macroglobulin domain containing 8      | K.M*GEPVASAHTAK.I                      | 2 | 2.14 | 0.24 | -3.54 |
| IPI00291807 | C3 and PZP-like, alpha-2-macroglobulin domain containing 8      | K.VPDSITSWVGEAVALSTSQGLGIAEPSLLK.T     | 3 | 3.08 | 0.29 | -2.33 |
| IPI00291807 | C3 and PZP-like, alpha-2-macroglobulin domain containing 8      | R.AAPALEKPIR.L                         | 2 | 2.34 | 0.34 | -3.56 |
| IPI00291807 | C3 and PZP-like, alpha-2-macroglobulin domain containing 8      | R.DM*IPADVPEHFR.G                      | 3 | 2.85 | 0.23 | -1.26 |
| IPI00291807 | C3 and PZP-like, alpha-2-macroglobulin domain containing 8      | R.VLFYFDEIPSR.C                        | 2 | 3.41 | 0.34 | -3.78 |
| IPI00291866 | Plasma protease C1 inhibitor precursor                          | A.TSSSSQDPESLQDR.G                     | 2 | 3.86 | 0.48 | -1.99 |
| IPI00291866 | Plasma protease C1 inhibitor precursor                          | D.PDLQVSAMQHQTVLELTETGVEAAAASISVAR.T   | 3 | 4.03 | 0.38 | -2.89 |
| IPI00291866 | Plasma protease C1 inhibitor precursor                          | F.SIASLLTQVLLGAGENTK.T                 | 2 | 4.85 | 0.43 | -4.85 |
| IPI00291866 | Plasma protease C1 inhibitor precursor                          | F.SIASLLTQVLLGAGENTK.T                 | 3 | 5.09 | 0.43 | -3.85 |
| IPI00291866 | Plasma protease C1 inhibitor precursor                          | H.QTVLELTETGVEAAAASISVAR.T             | 3 | 4.28 | 0.31 | -4.74 |
| IPI00291866 | Plasma protease C1 inhibitor precursor                          | K.AIM*EKLEM*SK.F                       | 1 | 2.10 | 0.10 | -2.87 |
| IPI00291866 | Plasma protease C1 inhibitor precursor                          | K.AIM*EKLEM*SK.F                       | 2 | 3.23 | 0.22 | -4.39 |
| IPI00291866 | Plasma protease C1 inhibitor precursor                          | K.AIM*EKLEM*SKFQPTLLTLPR.I             | 3 | 4.27 | 0.44 | -3.99 |
| IPI00291866 | Plasma protease C1 inhibitor precursor                          | K.DFTCVHQALK.G                         | 1 | 2.73 | 0.25 | -4.06 |
| IPI00291866 | Plasma protease C1 inhibitor precursor                          | K.DFTCVHQALK.G                         | 2 | 3.08 | 0.36 | -2.55 |
| IPI00291866 | Plasma protease C1 inhibitor precursor                          | K.FPVFM*GR.V                           | 2 | 2.15 | 0.17 | -2.81 |
| IPI00291866 | Plasma protease C1 inhibitor precursor                          | K.FQPTLLTLPR.I                         | 1 | 2.40 | 0.27 | -3.35 |
| IPI00291866 | Plasma protease C1 inhibitor precursor                          | K.FQPTLLTLPR.I                         | 2 | 2.91 | 0.24 | -4.25 |
| IPI00291866 | Plasma protease C1 inhibitor precursor                          | K.GVTSVSVQIFHSPDLAIR.D                 | 2 | 4.56 | 0.38 | -4.05 |
| IPI00291866 | Plasma protease C1 inhibitor precursor                          | K.GVTSVSVQIFHSPDLAIR.D                 | 3 | 3.80 | 0.39 | -4.02 |
| IPI00291866 | Plasma protease C1 inhibitor precursor                          | K.HRLEDM*EQALSPSVFK.A                  | 2 | 3.84 | 0.47 | -3.54 |
| IPI00291866 | Plasma protease C1 inhibitor precursor                          | K.HRLEDM*EQALSPSVFK.A                  | 3 | 2.16 | 0.11 | -1.29 |



|             |                                        |                                    |   |      |      |       |
|-------------|----------------------------------------|------------------------------------|---|------|------|-------|
| IPI00291866 | Plasma protease C1 inhibitor precursor | K.KVETNM*AFSPFSIASLLTQVLLGAGENTK.T | 2 | 4.23 | 0.54 | -1.94 |
| IPI00291866 | Plasma protease C1 inhibitor precursor | K.KVETNM*AFSPFSIASLLTQVLLGAGENTK.T | 3 | 4.79 | 0.31 | -2.82 |
| IPI00291866 | Plasma protease C1 inhibitor precursor | K.KYPVAHFIDQTLK.A                  | 2 | 4.46 | 0.41 | -4.53 |
| IPI00291866 | Plasma protease C1 inhibitor precursor | K.KYPVAHFIDQTLK.A                  | 3 | 3.50 | 0.33 | -3.49 |
| IPI00291866 | Plasma protease C1 inhibitor precursor | K.LEM*SKFQPTLLTLPR.I               | 2 | 3.46 | 0.41 | -2.30 |
| IPI00291866 | Plasma protease C1 inhibitor precursor | K.LEM*SKFQPTLLTLPR.I               | 3 | 2.73 | 0.23 | -1.81 |
| IPI00291866 | Plasma protease C1 inhibitor precursor | K.LYHAFSAM*K.K                     | 1 | 2.67 | 0.26 | -3.69 |
| IPI00291866 | Plasma protease C1 inhibitor precursor | K.LYHAFSAM*K.K                     | 2 | 2.27 | 0.17 | -2.94 |
| IPI00291866 | Plasma protease C1 inhibitor precursor | K.NSVIKVPM*M*NSK.K                 | 2 | 3.12 | 0.30 | -3.68 |
| IPI00291866 | Plasma protease C1 inhibitor precursor | K.TNLESILSYPK.D                    | 1 | 1.87 | 0.23 | -2.91 |
| IPI00291866 | Plasma protease C1 inhibitor precursor | K.TNLESILSYPK.D                    | 2 | 4.22 | 0.39 | -3.40 |
| IPI00291866 | Plasma protease C1 inhibitor precursor | K.TNLESILSYPKDFTCVHQALK.G          | 2 | 3.84 | 0.39 | -6.99 |
| IPI00291866 | Plasma protease C1 inhibitor precursor | K.TNLESILSYPKDFTCVHQALK.G          | 3 | 4.30 | 0.24 |       |
| IPI00291866 | Plasma protease C1 inhibitor precursor | K.TNLESILSYPKDFTCVHQALK.G          | 4 | 2.81 | 0.31 | -3.89 |
| IPI00291866 | Plasma protease C1 inhibitor precursor | K.TRM*EPFHFK.N                     | 3 | 2.30 | 0.11 | -4.21 |
| IPI00291866 | Plasma protease C1 inhibitor precursor | K.TTFDPK.K                         | 1 | 1.57 | 0.11 | -3.31 |
| IPI00291866 | Plasma protease C1 inhibitor precursor | K.TTFDPK.T                         | 1 | 1.95 | 0.15 | -3.82 |
| IPI00291866 | Plasma protease C1 inhibitor precursor | K.TTFDPK.T                         | 2 | 2.29 | 0.20 | -4.82 |
| IPI00291866 | Plasma protease C1 inhibitor precursor | K.VATTVISK.M                       | 1 | 1.47 | 0.18 | -2.06 |
| IPI00291866 | Plasma protease C1 inhibitor precursor | K.VATTVISK.M                       | 2 | 1.99 | 0.08 | -1.83 |
| IPI00291866 | Plasma protease C1 inhibitor precursor | K.VPM*M*NSK.K                      | 2 | 1.87 | 0.08 | -2.66 |
| IPI00291866 | Plasma protease C1 inhibitor precursor | K.VTTSQDM*LSIM*EK.L                | 2 | 4.20 | 0.40 | -4.38 |
| IPI00291866 | Plasma protease C1 inhibitor precursor | K.YPVAHFIDQTLK.A                   | 2 | 4.13 | 0.31 | -3.91 |
| IPI00291866 | Plasma protease C1 inhibitor precursor | K.YPVAHFIDQTLK.A                   | 3 | 4.27 | 0.38 | -2.59 |
| IPI00291866 | Plasma protease C1 inhibitor precursor | K.YPVAHFIDQTLKAK.V                 | 2 | 4.65 | 0.50 | -3.21 |
| IPI00291866 | Plasma protease C1 inhibitor precursor | Q.PTLLTLPR.I                       | 2 | 3.29 | 0.10 | -1.97 |
| IPI00291866 | Plasma protease C1 inhibitor precursor | R.IKVTTSQDM*LSIM*EK.L              | 2 | 5.09 | 0.56 | -4.09 |
| IPI00291866 | Plasma protease C1 inhibitor precursor | R.IKVTTSQDM*LSIM*EK.L              | 3 | 4.23 | 0.39 | -4.29 |
| IPI00291866 | Plasma protease C1 inhibitor precursor | R.LEDM*EQALSPSVFK.A                | 1 | 1.82 | 0.41 | -1.96 |
| IPI00291866 | Plasma protease C1 inhibitor precursor | R.LEDM*EQALSPSVFK.A                | 2 | 4.92 | 0.47 | -4.91 |
| IPI00291866 | Plasma protease C1 inhibitor precursor | R.LEDM*EQALSPSVFK.A                | 3 | 3.86 | 0.14 | -0.91 |
| IPI00291866 | Plasma protease C1 inhibitor precursor | R.LLDSLPSDTR.L                     | 1 | 1.87 | 0.16 | -3.69 |
| IPI00291866 | Plasma protease C1 inhibitor precursor | R.LLDSLPSDTR.L                     | 2 | 3.84 | 0.29 | -3.49 |
| IPI00291866 | Plasma protease C1 inhibitor precursor | R.LLDSLPSDTRLVLLNAIYLSAK.W         | 2 | 2.94 | 0.46 | -4.43 |
| IPI00291866 | Plasma protease C1 inhibitor precursor | R.LLDSLPSDTRLVLLNAIYLSAK.W         | 3 | 4.34 | 0.54 | -4.41 |
| IPI00291866 | Plasma protease C1 inhibitor precursor | R.LVLLNAIYLSAK.W                   | 1 | 2.77 | 0.26 | -2.02 |
| IPI00291866 | Plasma protease C1 inhibitor precursor | R.LVLLNAIYLSAK.W                   | 2 | 5.03 | 0.55 | -5.62 |
| IPI00291866 | Plasma protease C1 inhibitor precursor | R.M*EPFHFK.N                       | 2 | 1.90 | 0.06 | -2.30 |
| IPI00291866 | Plasma protease C1 inhibitor precursor | R.TLYSSPR.V                        | 1 | 1.97 | 0.18 | -3.82 |
| IPI00291866 | Plasma protease C1 inhibitor precursor | R.TLYSSPR.V                        | 2 | 2.42 | 0.31 | -3.66 |
| IPI00291866 | Plasma protease C1 inhibitor precursor | V.SQIFHSPDLAIR.D                   | 2 | 3.68 | 0.35 | -1.58 |
| IPI00291866 | Plasma protease C1 inhibitor precursor | V.TSVSQIFHSPDLAIR.D                | 2 | 3.95 | 0.39 | -0.43 |

|             |                                                             |                                |   |      |      |       |
|-------------|-------------------------------------------------------------|--------------------------------|---|------|------|-------|
| IPI00291922 | Proteasome subunit alpha type-5                             | R.LFQVEYAIEAIK.L               | 2 | 4.17 | 0.27 | -4.46 |
| IPI00291939 | Structural maintenance of chromosomes protein 1A            | K.NQHLAKKSEVNDKNHEM*EEIR.K     | 3 | 2.92 | 0.13 |       |
| IPI00291987 | Insulin-like growth factor-binding protein-like 1 precursor | K.SPEGTQALEELPGDHVNIQVQR.G     | 3 | 4.63 | 0.35 | -2.29 |
| IPI00292071 | Secretogranin-3 precursor                                   | E.DNFEELQYFPNFYALLK.S          | 2 | 4.60 | 0.52 | -4.55 |
| IPI00292071 | Secretogranin-3 precursor                                   | E.LSAERPLNEQIAEAEEDKIKK.T      | 3 | 5.71 | 0.44 | -3.17 |
| IPI00292071 | Secretogranin-3 precursor                                   | G.KTEAYLEAIRK.N                | 2 | 3.41 | 0.32 | -3.85 |
| IPI00292071 | Secretogranin-3 precursor                                   | I.DDYDSTK.S                    | 1 | 2.20 | 0.24 | -1.01 |
| IPI00292071 | Secretogranin-3 precursor                                   | I.TESQAHTLEDEVAEVLQK.L         | 2 | 5.45 | 0.53 | -0.16 |
| IPI00292071 | Secretogranin-3 precursor                                   | K.AITEKEKIEK.E                 | 2 | 3.73 | 0.23 | -3.17 |
| IPI00292071 | Secretogranin-3 precursor                                   | K.AITEKEKIEKE.R                | 2 | 3.07 | 0.17 | -3.21 |
| IPI00292071 | Secretogranin-3 precursor                                   | K.AITEKEKIEKER.Q               | 2 | 3.95 | 0.19 | -4.50 |
| IPI00292071 | Secretogranin-3 precursor                                   | K.DDNSNPGGKTDEPKGKTEAYLEAIRK.N | 3 | 5.15 | 0.49 | -4.23 |
| IPI00292071 | Secretogranin-3 precursor                                   | K.DSTKDDNSNPGGKTDEPK.G         | 2 | 3.57 | 0.35 | -3.17 |
| IPI00292071 | Secretogranin-3 precursor                                   | K.DSTKDDNSNPGGKTDEPK.G         | 3 | 2.44 | 0.16 | -1.45 |
| IPI00292071 | Secretogranin-3 precursor                                   | K.EAKEKETLITIM*K.T             | 2 | 3.19 | 0.36 | -1.32 |
| IPI00292071 | Secretogranin-3 precursor                                   | K.EANNYEEDPNKPTSWTENQAGK.I     | 2 | 3.62 | 0.44 | -3.13 |
| IPI00292071 | Secretogranin-3 precursor                                   | K.EANNYEEDPNKPTSWTENQAGK.I     | 3 | 4.16 | 0.46 | -1.98 |
| IPI00292071 | Secretogranin-3 precursor                                   | K.EKETLITIM*K.T                | 1 | 2.53 | 0.24 | -4.08 |
| IPI00292071 | Secretogranin-3 precursor                                   | K.EKETLITIM*K.T                | 2 | 3.22 | 0.32 | -4.47 |
| IPI00292071 | Secretogranin-3 precursor                                   | K.ETLITIM*K.T                  | 1 | 2.59 | 0.10 | -3.82 |
| IPI00292071 | Secretogranin-3 precursor                                   | K.ETLITIM*K.T                  | 2 | 1.85 | 0.07 | -1.88 |
| IPI00292071 | Secretogranin-3 precursor                                   | K.EYGSLK.D                     | 1 | 1.95 | 0.07 | -3.85 |
| IPI00292071 | Secretogranin-3 precursor                                   | K.EYGSLKDSTK.D                 | 1 | 2.72 | 0.36 | -4.34 |
| IPI00292071 | Secretogranin-3 precursor                                   | K.EYGSLKDSTK.D                 | 2 | 2.29 | 0.29 | -2.21 |
| IPI00292071 | Secretogranin-3 precursor                                   | K.EYGSLKDSTKDDNSNPGGK.T        | 2 | 4.31 | 0.46 | -6.45 |
| IPI00292071 | Secretogranin-3 precursor                                   | K.EYGSLKDSTKDDNSNPGGK.T        | 3 | 2.44 | 0.32 | -3.87 |
| IPI00292071 | Secretogranin-3 precursor                                   | K.EYGSLKDSTKDDNSNPGGKTDEPK.G   | 3 | 5.59 | 0.42 | -4.00 |
| IPI00292071 | Secretogranin-3 precursor                                   | K.EYGSLKDSTKDDNSNPGGKTDEPK.G   | 4 | 2.57 | 0.25 | -2.77 |
| IPI00292071 | Secretogranin-3 precursor                                   | K.EYGSLKDSTKDDNSNPGGKTDEPKGK.T | 3 | 4.48 | 0.42 | -1.74 |
| IPI00292071 | Secretogranin-3 precursor                                   | K.FQDDPDGLHQL.D                | 1 | 2.56 | 0.38 | -2.80 |
| IPI00292071 | Secretogranin-3 precursor                                   | K.FQDDPDGLHQL.D                | 2 | 3.22 | 0.24 | -2.98 |
| IPI00292071 | Secretogranin-3 precursor                                   | K.FQDDPDGLHQLDGTPL.L           | 2 | 2.96 | 0.34 | -3.89 |
| IPI00292071 | Secretogranin-3 precursor                                   | K.FQDDPDGLHQLDGTPLTAEDIVH.K    | 3 | 5.17 | 0.40 | -2.91 |
| IPI00292071 | Secretogranin-3 precursor                                   | K.FQDDPDGLHQLDGTPLTAEDIVHK.I   | 2 | 5.34 | 0.58 | -3.87 |
| IPI00292071 | Secretogranin-3 precursor                                   | K.FQDDPDGLHQLDGTPLTAEDIVHK.I   | 3 | 5.26 | 0.46 | -2.91 |
| IPI00292071 | Secretogranin-3 precursor                                   | K.FQDDPDGLHQLDGTPLTAEDIVHK.I   | 4 | 4.51 | 0.46 | -3.74 |
| IPI00292071 | Secretogranin-3 precursor                                   | K.FQDDPDGLHQLDGTPLTAEDIVHKI.A  | 3 | 3.95 | 0.26 | -2.80 |
| IPI00292071 | Secretogranin-3 precursor                                   | K.GENDETVSNTLTLTNGLER.R        | 2 | 5.70 | 0.50 | -3.91 |
| IPI00292071 | Secretogranin-3 precursor                                   | K.GENDETVSNTLTLTNGLER.R        | 3 | 4.60 | 0.34 | -3.58 |
| IPI00292071 | Secretogranin-3 precursor                                   | K.GENDETVSNTLTLTNGLERR.T       | 3 | 2.69 | 0.19 | -2.58 |

|             |                           |                                    |   |      |      |       |
|-------------|---------------------------|------------------------------------|---|------|------|-------|
| IPI00292071 | Secretogranin-3 precursor | K.GILDKEEAEAIKR.I                  | 2 | 3.75 | 0.33 | -3.13 |
| IPI00292071 | Secretogranin-3 precursor | K.GILDKEEAEAIKR.I                  | 3 | 4.52 | 0.40 | -3.00 |
| IPI00292071 | Secretogranin-3 precursor | K.GKTEAYLEAIR.K                    | 2 | 3.64 | 0.30 | 0.89  |
| IPI00292071 | Secretogranin-3 precursor | K.GKTEAYLEAIRK.N                   | 2 | 3.22 | 0.15 | -3.31 |
| IPI00292071 | Secretogranin-3 precursor | K.GNKEDYDLSK.M                     | 1 | 3.09 | 0.30 | -4.30 |
| IPI00292071 | Secretogranin-3 precursor | K.GNKEDYDLSK.M                     | 2 | 3.16 | 0.34 | -4.07 |
| IPI00292071 | Secretogranin-3 precursor | K.IPEKVTPM*AAIQDGLAK.G             | 3 | 4.27 | 0.34 | -3.15 |
| IPI00292071 | Secretogranin-3 precursor | K.KGNKEDYDLSK.M                    | 1 | 2.69 | 0.30 | -5.42 |
| IPI00292071 | Secretogranin-3 precursor | K.KGNKEDYDLSK.M                    | 2 | 3.65 | 0.32 | -3.19 |
| IPI00292071 | Secretogranin-3 precursor | K.KGNKEDYDLSK.M                    | 3 | 2.09 | 0.12 | -4.57 |
| IPI00292071 | Secretogranin-3 precursor | K.LIDDYDSTK.S                      | 1 | 2.22 | 0.37 | -4.29 |
| IPI00292071 | Secretogranin-3 precursor | K.LIDDYDSTK.S                      | 2 | 3.17 | 0.32 | -3.99 |
| IPI00292071 | Secretogranin-3 precursor | K.LIDDYDSTKSGLDHK.F                | 2 | 3.68 | 0.39 | -2.05 |
| IPI00292071 | Secretogranin-3 precursor | K.LIDDYDSTKSGLDHK.F                | 4 | 2.70 | 0.29 | -2.34 |
| IPI00292071 | Secretogranin-3 precursor | K.LLNLGLITESQAHTLEDEVAEVLQK.L      | 2 | 5.69 | 0.58 | -3.89 |
| IPI00292071 | Secretogranin-3 precursor | K.LLNLGLITESQAHTLEDEVAEVLQK.L      | 3 | 7.54 | 0.61 | -7.09 |
| IPI00292071 | Secretogranin-3 precursor | K.LLNLGLITESQAHTLEDEVAEVLQK.L      | 4 | 5.16 | 0.44 | -5.38 |
| IPI00292071 | Secretogranin-3 precursor | K.LNVEDVDSTK.N                     | 1 | 2.79 | 0.37 | -2.06 |
| IPI00292071 | Secretogranin-3 precursor | K.LNVEDVDSTK.N                     | 2 | 3.21 | 0.29 | -2.86 |
| IPI00292071 | Secretogranin-3 precursor | K.LNVEDVDSTKN.R                    | 2 | 3.67 | 0.43 | -4.92 |
| IPI00292071 | Secretogranin-3 precursor | K.LNVEDVDSTKNR.K                   | 2 | 3.76 | 0.40 | -1.35 |
| IPI00292071 | Secretogranin-3 precursor | K.LNVEDVDSTKNR.K                   | 3 | 2.59 | 0.18 | -2.01 |
| IPI00292071 | Secretogranin-3 precursor | K.M*EKEYGSLK.D                     | 1 | 1.74 | 0.09 | -2.21 |
| IPI00292071 | Secretogranin-3 precursor | K.M*EKEYGSLK.D                     | 2 | 2.69 | 0.09 |       |
| IPI00292071 | Secretogranin-3 precursor | K.M*EKEYGSLKDSTK.D                 | 2 | 3.44 | 0.31 | -1.33 |
| IPI00292071 | Secretogranin-3 precursor | K.M*EKEYGSLKDSTK.D                 | 3 | 2.70 | 0.29 | 0.73  |
| IPI00292071 | Secretogranin-3 precursor | K.M*EKEYGSLKDSTKDDNSNPGGK.T        | 3 | 3.77 | 0.35 | -0.54 |
| IPI00292071 | Secretogranin-3 precursor | K.M*EKEYGSLKDSTKDDNSNPGGKTDEPK.G   | 3 | 4.89 | 0.47 | -2.52 |
| IPI00292071 | Secretogranin-3 precursor | K.M*EKEYGSLKDSTKDDNSNPGGKTDEPK.G   | 4 | 4.26 | 0.47 | -1.49 |
| IPI00292071 | Secretogranin-3 precursor | K.M*RFINKQADAYVEK.G                | 3 | 3.20 | 0.08 | -2.34 |
| IPI00292071 | Secretogranin-3 precursor | K.NATDNISK.L                       | 2 | 2.03 | 0.14 | -2.73 |
| IPI00292071 | Secretogranin-3 precursor | K.QADAYVEK.G                       | 1 | 2.15 | 0.21 | -4.03 |
| IPI00292071 | Secretogranin-3 precursor | K.QADAYVEK.G                       | 2 | 1.55 | 0.17 | -3.51 |
| IPI00292071 | Secretogranin-3 precursor | K.QADAYVEKGILDKEEAEAIKR.I          | 4 | 3.56 | 0.22 | -2.58 |
| IPI00292071 | Secretogranin-3 precursor | K.SGLDHKFQDDPDGLHQL.D              | 2 | 3.74 | 0.49 | -2.94 |
| IPI00292071 | Secretogranin-3 precursor | K.SGLDHKFQDDPDGLHQLDGTPLTAEDIVHK.I | 3 | 5.67 | 0.57 | -3.51 |
| IPI00292071 | Secretogranin-3 precursor | K.SGLDHKFQDDPDGLHQLDGTPLTAEDIVHK.I | 4 | 3.63 | 0.29 | -2.72 |
| IPI00292071 | Secretogranin-3 precursor | K.SGLDHKFQDDPDGLHQLDGTPLTAEDIVHK.I | 5 | 3.61 | 0.28 | -3.94 |
| IPI00292071 | Secretogranin-3 precursor | K.SHEETDSTKEEAAK.M                 | 2 | 3.68 | 0.53 | -4.70 |
| IPI00292071 | Secretogranin-3 precursor | K.SHEETDSTKEEAAK.M                 | 3 | 3.01 | 0.40 | -2.51 |
| IPI00292071 | Secretogranin-3 precursor | K.SIDSEKEAKEKETLITIM*K.T           | 2 | 5.13 | 0.55 | -1.15 |
| IPI00292071 | Secretogranin-3 precursor | K.SIDSEKEAKEKETLITIM*K.T           | 3 | 4.25 | 0.55 | -1.23 |

|             |                           |                                       |   |      |      |       |
|-------------|---------------------------|---------------------------------------|---|------|------|-------|
| IPI00292071 | Secretogranin-3 precursor | K.SIDSEKEAKEKETLITIM*K.T              | 4 | 2.91 | 0.40 | -0.33 |
| IPI00292071 | Secretogranin-3 precursor | K.TDEPKGKTEAYLEAIRK.N                 | 2 | 3.16 | 0.24 | -4.45 |
| IPI00292071 | Secretogranin-3 precursor | K.TDEPKGKTEAYLEAIRK.N                 | 3 | 3.37 | 0.36 | -3.46 |
| IPI00292071 | Secretogranin-3 precursor | K.TEAYLEAIR.K                         | 2 | 3.57 | 0.28 | -1.25 |
| IPI00292071 | Secretogranin-3 precursor | K.TEAYLEAIRK.N                        | 2 | 3.20 | 0.30 | -3.54 |
| IPI00292071 | Secretogranin-3 precursor | K.TYPENKPGQSNYSFVDNLNLLK.A            | 3 | 1.99 | 0.13 | -2.30 |
| IPI00292071 | Secretogranin-3 precursor | K.TYSEDNFEELQYFPNFYALLK.S             | 2 | 5.20 | 0.51 | -4.60 |
| IPI00292071 | Secretogranin-3 precursor | K.TYSEDNFEELQYFPNFYALLK.S             | 3 | 5.42 | 0.38 | -5.36 |
| IPI00292071 | Secretogranin-3 precursor | K.VTPM*AAIQDGLAK.G                    | 2 | 3.34 | 0.32 | -3.22 |
| IPI00292071 | Secretogranin-3 precursor | K.VTPM*AAIQDGLAKGENDETVSNTLTLTNGLER.R | 3 | 5.34 | 0.50 | -6.13 |
| IPI00292071 | Secretogranin-3 precursor | K.VTPM*AAIQDGLAKGENDETVSNTLTLTNGLER.R | 3 | 5.51 | 0.45 | -5.35 |
| IPI00292071 | Secretogranin-3 precursor | K.VTPM*AAIQDGLAKGENDETVSNTLTLTNGLER.R | 4 | 3.77 | 0.26 | -5.54 |
| IPI00292071 | Secretogranin-3 precursor | K.YGTISPEEGVSYLENLDEM*IALQTK.N        | 2 | 4.35 | 0.52 | -5.48 |
| IPI00292071 | Secretogranin-3 precursor | K.YGTISPEEGVSYLENLDEM*IALQTK.N        | 3 | 5.74 | 0.47 | -5.96 |
| IPI00292071 | Secretogranin-3 precursor | K.YGTISPEEGVSYLENLDEM*IALQTK.N        | 4 | 5.66 | 0.43 | -3.16 |
| IPI00292071 | Secretogranin-3 precursor | L.DGTPLTAEDIVHK.I                     | 2 | 2.97 | 0.23 | -3.31 |
| IPI00292071 | Secretogranin-3 precursor | L.GLITESQAHTLEDEVAEVLQK.L             | 2 | 5.32 | 0.56 | -3.78 |
| IPI00292071 | Secretogranin-3 precursor | L.GLITESQAHTLEDEVAEVLQK.L             | 3 | 4.47 | 0.34 | -4.03 |
| IPI00292071 | Secretogranin-3 precursor | L.ITESQAHTLEDEVAEVLQK.L               | 2 | 4.38 | 0.48 | -1.67 |
| IPI00292071 | Secretogranin-3 precursor | L.LNLGLITESQAHTLEDEVAEVLQK.L          | 3 | 6.33 | 0.53 | -3.92 |
| IPI00292071 | Secretogranin-3 precursor | L.NLGLITESQAHTLEDEVAEVLQK.L           | 2 | 5.16 | 0.51 | -3.41 |
| IPI00292071 | Secretogranin-3 precursor | L.SAERPLNEQIAEAEEDKIKK.T              | 3 | 5.10 | 0.37 | -1.81 |
| IPI00292071 | Secretogranin-3 precursor | N.LGLITESQAHTLEDEVAEVLQK.L            | 2 | 4.85 | 0.48 | -1.99 |
| IPI00292071 | Secretogranin-3 precursor | N.LGLITESQAHTLEDEVAEVLQK.L            | 3 | 3.63 | 0.32 | -3.96 |
| IPI00292071 | Secretogranin-3 precursor | R.AVFDKIVSK.L                         | 1 | 2.32 | 0.12 | -2.41 |
| IPI00292071 | Secretogranin-3 precursor | R.AVFDKIVSK.L                         | 2 | 2.72 | 0.26 | -2.78 |
| IPI00292071 | Secretogranin-3 precursor | R.DFINKQADAYVEK.G                     | 2 | 3.71 | 0.34 | -2.60 |
| IPI00292071 | Secretogranin-3 precursor | R.ELSAERPLNEQIAEAEED.K                | 2 | 5.05 | 0.44 | -3.90 |
| IPI00292071 | Secretogranin-3 precursor | R.ELSAERPLNEQIAEAEEDK.I               | 2 | 4.46 | 0.36 | -5.00 |
| IPI00292071 | Secretogranin-3 precursor | R.ELSAERPLNEQIAEAEEDK.I               | 3 | 3.58 | 0.27 | -3.69 |
| IPI00292071 | Secretogranin-3 precursor | R.ELSAERPLNEQIAEAEEDKI.K              | 2 | 5.16 | 0.35 | -3.76 |
| IPI00292071 | Secretogranin-3 precursor | R.ELSAERPLNEQIAEAEEDKI.K              | 3 | 5.32 | 0.33 | -2.61 |
| IPI00292071 | Secretogranin-3 precursor | R.ELSAERPLNEQIAEAEEDKIK.K             | 2 | 4.38 | 0.28 | -2.36 |
| IPI00292071 | Secretogranin-3 precursor | R.ELSAERPLNEQIAEAEEDKIK.K             | 3 | 5.80 | 0.32 | -1.07 |
| IPI00292071 | Secretogranin-3 precursor | R.ELSAERPLNEQIAEAEEDKIKK.T            | 2 | 4.49 | 0.37 | -4.98 |
| IPI00292071 | Secretogranin-3 precursor | R.ELSAERPLNEQIAEAEEDKIKK.T            | 3 | 6.56 | 0.52 | -4.30 |
| IPI00292071 | Secretogranin-3 precursor | R.ELSAERPLNEQIAEAEEDKIKK.T            | 5 | 2.83 | 0.25 | -3.45 |
| IPI00292071 | Secretogranin-3 precursor | R.IYEENDR.A                           | 1 | 1.57 | 0.06 | -2.65 |
| IPI00292071 | Secretogranin-3 precursor | R.IYEENDR.A                           | 2 | 2.31 | 0.06 | -0.60 |
| IPI00292071 | Secretogranin-3 precursor | R.IYEENDRAVFDK.I                      | 2 | 3.77 | 0.41 | -4.53 |
| IPI00292071 | Secretogranin-3 precursor | R.IYEENDRAVFDKIVSK.L                  | 2 | 3.56 | 0.22 | -5.32 |
| IPI00292071 | Secretogranin-3 precursor | R.IYEENDRAVFDKIVSK.L                  | 3 | 3.44 | 0.28 | -5.37 |

|             |                                                                    |                                        |   |      |      |       |
|-------------|--------------------------------------------------------------------|----------------------------------------|---|------|------|-------|
| IPI00292071 | Secretogranin-3 precursor                                          | R.KLIDDDYDSTK.S                        | 1 | 3.21 | 0.40 | -3.53 |
| IPI00292071 | Secretogranin-3 precursor                                          | R.KLIDDDYDSTK.S                        | 2 | 3.48 | 0.34 | -3.28 |
| IPI00292071 | Secretogranin-3 precursor                                          | R.KLIDDDYDSTKSGLDHK.F                  | 3 | 2.04 | 0.18 | -1.13 |
| IPI00292071 | Secretogranin-3 precursor                                          | R.KLIDDDYDSTKSGLDHK.F                  | 4 | 3.80 | 0.33 | -2.45 |
| IPI00292071 | Secretogranin-3 precursor                                          | R.KLIDDDYDSTKSGLDHKFQ.D                | 3 | 4.41 | 0.37 | -2.29 |
| IPI00292071 | Secretogranin-3 precursor                                          | R.SSPLDNKLNVEDVDSTK.N                  | 2 | 5.03 | 0.51 | -5.13 |
| IPI00292071 | Secretogranin-3 precursor                                          | R.SSPLDNKLNVEDVDSTK.N                  | 3 | 3.48 | 0.43 | -3.91 |
| IPI00292071 | Secretogranin-3 precursor                                          | R.SSPLDNKLNVEDVDSTKN.R                 | 2 | 4.79 | 0.52 | -3.04 |
| IPI00292071 | Secretogranin-3 precursor                                          | R.SSPLDNKLNVEDVDSTKNR.K                | 2 | 4.65 | 0.49 | -3.49 |
| IPI00292071 | Secretogranin-3 precursor                                          | R.SSPLDNKLNVEDVDSTKNR.K                | 3 | 4.13 | 0.56 | -3.00 |
| IPI00292071 | Secretogranin-3 precursor                                          | R.SSPLDNKLNVEDVDSTKNR.K.L              | 3 | 3.96 | 0.46 | -2.27 |
| IPI00292071 | Secretogranin-3 precursor                                          | R.TKTYSEDNFEELQYFPN.F                  | 2 | 5.24 | 0.49 | -3.22 |
| IPI00292071 | Secretogranin-3 precursor                                          | R.TKTYSEDNFEELQYFPNF.Y                 | 2 | 4.35 | 0.45 | -2.87 |
| IPI00292071 | Secretogranin-3 precursor                                          | R.TKTYSEDNFEELQYFPNFY.A                | 2 | 3.42 | 0.25 | -1.97 |
| IPI00292071 | Secretogranin-3 precursor                                          | R.TKTYSEDNFEELQYFPNFYALLK.S            | 2 | 4.90 | 0.49 | -3.89 |
| IPI00292071 | Secretogranin-3 precursor                                          | R.TKTYSEDNFEELQYFPNFYALLK.S            | 3 | 5.67 | 0.42 | -4.49 |
| IPI00292071 | Secretogranin-3 precursor                                          | R.TKTYSEDNFEELQYFPNFYALLK.S            | 4 | 3.38 | 0.27 | -2.97 |
| IPI00292071 | Secretogranin-3 precursor                                          | S.AERPLNEQIAEAEEDKIKK.T                | 3 | 6.00 | 0.44 | -2.42 |
| IPI00292071 | Secretogranin-3 precursor                                          | T.YSEDNFEELQYFPNFYALLK.S               | 2 | 4.73 | 0.51 | -4.50 |
| IPI00292071 | Secretogranin-3 precursor                                          | Y.SEDNFEELQYFPNFYALLK.S                | 2 | 5.00 | 0.51 | -3.31 |
| IPI00292150 | Latent-transforming growth factor beta-binding protein 2 precursor | K.AISM*LQGLCYR.S                       | 2 | 2.74 | 0.35 | 0.60  |
| IPI00292150 | Latent-transforming growth factor beta-binding protein 2 precursor | L.FREQDAPVAGLQPVER.A                   | 3 | 3.65 | 0.26 | -1.18 |
| IPI00292150 | Latent-transforming growth factor beta-binding protein 2 precursor | R.EQDAPVAGLQPVER.A                     | 2 | 4.12 | 0.47 | -2.73 |
| IPI00292150 | Latent-transforming growth factor beta-binding protein 2 precursor | R.GAGGQSM*SEAPTGDHAPAPTR.M             | 2 | 4.12 | 0.49 | 0.76  |
| IPI00292150 | Latent-transforming growth factor beta-binding protein 2 precursor | R.GAGGQSM*SEAPTGDHAPAPTR.M             | 3 | 3.59 | 0.25 | -1.70 |
| IPI00292150 | Latent-transforming growth factor beta-binding protein 2 precursor | R.SGEPPrPLPPAAPRPR.G                   | 3 | 3.68 | 0.46 | -2.93 |
| IPI00292150 | Latent-transforming growth factor beta-binding protein 2 precursor | R.SLPGTCTLPLAQR.I                      | 2 | 3.59 | 0.31 | -2.95 |
| IPI00292150 | Latent-transforming growth factor beta-binding protein 2 precursor | R.SSAAGEGLAR.A                         | 2 | 2.79 | 0.16 | -1.96 |
| IPI00292150 | Latent-transforming growth factor beta-binding protein 2 precursor | R.SSEVYAQLCNVAR.I                      | 2 | 4.36 | 0.48 | -3.22 |
| IPI00292150 | Latent-transforming growth factor beta-binding protein 2 precursor | R.STPLGQQQPAPR.T                       | 2 | 3.11 | 0.41 | -3.08 |
| IPI00292218 | Hepatocyte growth factor-like protein precursor                    | K.CEIAGWGETKGTGNDTVLNVALLNVISNQEENIK.H | 3 | 1.90 | 0.10 | 2.99  |
| IPI00292218 | Hepatocyte growth factor-like protein precursor                    | R.QEATTVSCFR.G                         | 2 | 2.68 | 0.32 | -2.57 |

|             |                                                        |                                     |   |      |      |       |
|-------------|--------------------------------------------------------|-------------------------------------|---|------|------|-------|
| IPI00292218 | Hepatocyte growth factor-like protein precursor        | R.SPLNDFQVLR.G                      | 2 | 3.19 | 0.28 | -1.99 |
| IPI00292218 | Hepatocyte growth factor-like protein precursor        | R.VALICLPPEWYVPPGTK.C               | 2 | 2.87 | 0.22 | -2.06 |
| IPI00292218 | Hepatocyte growth factor-like protein precursor        | R.VALICLPPEWYVPPGTK.C               | 3 | 2.77 | 0.06 | -0.07 |
| IPI00292218 | Hepatocyte growth factor-like protein precursor        | R.VSVFVDWIHK.V                      | 3 | 1.54 | 0.15 | -3.30 |
| IPI00292300 | contactin associated protein-like 5                    | K.LM*STLKDVISLK.F                   | 3 | 3.19 | 0.20 | -1.80 |
| IPI00292300 | contactin associated protein-like 5                    | K.SDVADFGR.S                        | 2 | 2.16 | 0.21 | -3.04 |
| IPI00292300 | contactin associated protein-like 5                    | K.VTENLGLDSEVAK.A                   | 2 | 4.20 | 0.35 | -5.29 |
| IPI00292300 | contactin associated protein-like 5                    | R.LLNTPDGTPFTWWIGR.S                | 2 | 4.18 | 0.48 | -4.45 |
| IPI00292300 | contactin associated protein-like 5                    | R.NLKETSLQVDNLPR.S                  | 2 | 3.90 | 0.48 | -3.46 |
| IPI00292300 | contactin associated protein-like 5                    | R.NLKETSLQVDNLPR.S                  | 3 | 3.35 | 0.07 | -0.38 |
| IPI00292304 | Uncharacterized protein C9orf4                         | R.ARGDTGADEAVPR.H                   | 2 | 3.52 | 0.40 | -3.05 |
| IPI00292304 | Uncharacterized protein C9orf4                         | R.DEEGVFENNR.V                      | 2 | 2.86 | 0.27 | -2.67 |
| IPI00292304 | Uncharacterized protein C9orf4                         | R.GDTGADEAVPR.H                     | 2 | 3.23 | 0.23 | -3.05 |
| IPI00292304 | Uncharacterized protein C9orf4                         | R.HDIDSPPASER.V                     | 2 | 3.06 | 0.30 | -3.31 |
| IPI00292304 | Uncharacterized protein C9orf4                         | R.HDSSYGTFFAGEFYDLR.Y               | 3 | 2.39 | 0.08 | -1.30 |
| IPI00292304 | Uncharacterized protein C9orf4                         | R.NPARDEEGVFENNR.V                  | 2 | 3.62 | 0.35 | -3.89 |
| IPI00292304 | Uncharacterized protein C9orf4                         | R.RPRQGGGGAGGSAAARAR.A              | 2 | 2.92 | 0.07 |       |
| IPI00292304 | Uncharacterized protein C9orf4                         | R.YGKPGCNAETCDYFLSYR.M              | 3 | 3.43 | 0.17 | -0.69 |
| IPI00292393 | Sodium channel protein type 4 subunit alpha            | K.QASYMYRSHSDGSGDDAPEKEGLLANTM*SK.M | 3 | 2.49 | 0.06 | 0.63  |
| IPI00292496 | Beta-tubulin 4Q                                        | K.NM*M*AACDPR.H                     | 2 | 1.73 | 0.12 | 0.11  |
| IPI00292496 | Beta-tubulin 4Q                                        | R.LHFFM*PGFAPLTSR.G                 | 3 | 3.20 | 0.06 | -3.00 |
| IPI00292496 | Beta-tubulin 4Q                                        | R.LHFFMPGFAPLTSR.G                  | 3 | 2.62 | 0.11 | -1.73 |
| IPI00292530 | Inter-alpha-trypsin inhibitor heavy chain H1 precursor | K.AAISGENAGLVR.A                    | 1 | 2.74 | 0.41 | -2.52 |
| IPI00292530 | Inter-alpha-trypsin inhibitor heavy chain H1 precursor | K.AAISGENAGLVR.A                    | 2 | 3.81 | 0.42 | -2.05 |
| IPI00292530 | Inter-alpha-trypsin inhibitor heavy chain H1 precursor | K.ADVQAHGEGQEFSITCLVDEEEM*KK.L      | 3 | 5.06 | 0.45 | -4.17 |
| IPI00292530 | Inter-alpha-trypsin inhibitor heavy chain H1 precursor | K.ADVQAHGEGQEFSITCLVDEEEM*KK.L      | 4 | 3.88 | 0.29 | -3.14 |
| IPI00292530 | Inter-alpha-trypsin inhibitor heavy chain H1 precursor | K.ELAAQTIK.K                        | 1 | 1.85 | 0.13 | -2.44 |
| IPI00292530 | Inter-alpha-trypsin inhibitor heavy chain H1 precursor | K.ELAAQTIK.K                        | 2 | 1.98 | 0.06 | -2.97 |
| IPI00292530 | Inter-alpha-trypsin inhibitor heavy chain H1 precursor | K.ELAAQTIKK.S                       | 1 | 2.02 | 0.10 | -3.94 |
| IPI00292530 | Inter-alpha-trypsin inhibitor heavy chain H1 precursor | K.ELAAQTIKK.S                       | 2 | 2.04 | 0.15 | -1.84 |
| IPI00292530 | Inter-alpha-trypsin inhibitor heavy chain H1 precursor | K.GSLVQASEANLQAAQDFVR.G             | 2 | 6.74 | 0.63 | -4.19 |
| IPI00292530 | Inter-alpha-trypsin inhibitor heavy chain H1 precursor | K.GSLVQASEANLQAAQDFVR.G             | 3 | 6.29 | 0.46 | -3.52 |

|             |                                                        |                                     |   |      |      |       |
|-------------|--------------------------------------------------------|-------------------------------------|---|------|------|-------|
| IPI00292530 | Inter-alpha-trypsin inhibitor heavy chain H1 precursor | K.ILGDM*QPGDYFDLVLFGR.V             | 2 | 5.55 | 0.50 | -5.28 |
| IPI00292530 | Inter-alpha-trypsin inhibitor heavy chain H1 precursor | K.ILGDM*QPGDYFDLVLFGR.V             | 3 | 3.84 | 0.31 | -4.18 |
| IPI00292530 | Inter-alpha-trypsin inhibitor heavy chain H1 precursor | K.LDAQASFLPK.E                      | 2 | 3.04 | 0.25 | -3.46 |
| IPI00292530 | Inter-alpha-trypsin inhibitor heavy chain H1 precursor | K.QLVHHFEIDVDIFEPQGISK.L            | 2 | 2.96 | 0.32 | -4.33 |
| IPI00292530 | Inter-alpha-trypsin inhibitor heavy chain H1 precursor | K.QLVHHFEIDVDIFEPQGISK.L            | 3 | 4.16 | 0.26 | -5.40 |
| IPI00292530 | Inter-alpha-trypsin inhibitor heavy chain H1 precursor | K.QYYEGSEIVVAGR.I                   | 1 | 1.03 | 0.05 | -2.84 |
| IPI00292530 | Inter-alpha-trypsin inhibitor heavy chain H1 precursor | K.QYYEGSEIVVAGR.I                   | 2 | 3.71 | 0.43 | -3.33 |
| IPI00292530 | Inter-alpha-trypsin inhibitor heavy chain H1 precursor | K.TAFISDFAVTADGNAFIGDIK.D           | 2 | 4.24 | 0.46 | -5.82 |
| IPI00292530 | Inter-alpha-trypsin inhibitor heavy chain H1 precursor | K.TAFISDFAVTADGNAFIGDIKDK.V         | 3 | 3.16 | 0.24 | -3.02 |
| IPI00292530 | Inter-alpha-trypsin inhibitor heavy chain H1 precursor | K.VTFQLTYEEVLKR.N                   | 3 | 2.82 | 0.25 | -2.31 |
| IPI00292530 | Inter-alpha-trypsin inhibitor heavy chain H1 precursor | K.VTYDVSR.D                         | 1 | 2.04 | 0.12 | -2.91 |
| IPI00292530 | Inter-alpha-trypsin inhibitor heavy chain H1 precursor | K.VTYDVSR.D                         | 2 | 2.43 | 0.15 | -4.13 |
| IPI00292530 | Inter-alpha-trypsin inhibitor heavy chain H1 precursor | K.VTYDVSRDK.I                       | 2 | 2.41 | 0.16 | -2.82 |
| IPI00292530 | Inter-alpha-trypsin inhibitor heavy chain H1 precursor | Q.M*SLDYGFVTPLTSM*SIR.G             | 2 | 5.14 | 0.54 | -2.23 |
| IPI00292530 | Inter-alpha-trypsin inhibitor heavy chain H1 precursor | R.EVAFDLEIPK.T                      | 1 | 2.84 | 0.19 | -2.85 |
| IPI00292530 | Inter-alpha-trypsin inhibitor heavy chain H1 precursor | R.EVAFDLEIPK.T                      | 2 | 2.96 | 0.28 | -2.50 |
| IPI00292530 | Inter-alpha-trypsin inhibitor heavy chain H1 precursor | R.FAHYVVTSQVVNTANEAR.E              | 2 | 6.75 | 0.55 | -4.28 |
| IPI00292530 | Inter-alpha-trypsin inhibitor heavy chain H1 precursor | R.FAHYVVTSQVVNTANEAR.E              | 3 | 5.32 | 0.30 | -6.35 |
| IPI00292530 | Inter-alpha-trypsin inhibitor heavy chain H1 precursor | R.GFSLDEATNLNGLLR.G                 | 2 | 5.26 | 0.50 | -5.41 |
| IPI00292530 | Inter-alpha-trypsin inhibitor heavy chain H1 precursor | R.GHM*LENHVER.L                     | 2 | 2.69 | 0.26 | -3.36 |
| IPI00292530 | Inter-alpha-trypsin inhibitor heavy chain H1 precursor | R.GM*ADQDGLKPTIDKPSSEDSPPLEM*LGPR.R | 3 | 5.23 | 0.49 | -2.98 |

|             |                                                               |                                     |   |      |      |       |
|-------------|---------------------------------------------------------------|-------------------------------------|---|------|------|-------|
| IPI00292530 | Inter-alpha-trypsin inhibitor heavy chain H1 precursor        | R.GM*ADQDGLKPTIDKPSSEDSPPLEM*LGPR.R | 4 | 4.37 | 0.50 | -2.33 |
| IPI00292530 | Inter-alpha-trypsin inhibitor heavy chain H1 precursor        | R.IADNKQSSFK.A                      | 1 | 2.61 | 0.25 | -4.28 |
| IPI00292530 | Inter-alpha-trypsin inhibitor heavy chain H1 precursor        | R.IADNKQSSFK.A                      | 2 | 3.32 | 0.33 | -2.92 |
| IPI00292530 | Inter-alpha-trypsin inhibitor heavy chain H1 precursor        | R.IYEDHDATQQLQGFYSQVAK.P            | 2 | 4.97 | 0.57 | -2.07 |
| IPI00292530 | Inter-alpha-trypsin inhibitor heavy chain H1 precursor        | R.IYEDHDATQQLQGFYSQVAK.P            | 3 | 4.77 | 0.38 | -2.00 |
| IPI00292530 | Inter-alpha-trypsin inhibitor heavy chain H1 precursor        | R.KAAISGENAGLVR.A                   | 1 | 2.78 | 0.35 | -2.94 |
| IPI00292530 | Inter-alpha-trypsin inhibitor heavy chain H1 precursor        | R.KAAISGENAGLVR.A                   | 2 | 3.52 | 0.38 | -3.71 |
| IPI00292530 | Inter-alpha-trypsin inhibitor heavy chain H1 precursor        | R.LWAYLTIQELLAK.R                   | 2 | 3.18 | 0.22 | -3.86 |
| IPI00292530 | Inter-alpha-trypsin inhibitor heavy chain H1 precursor        | R.NHM*QYEIVIK.V                     | 1 | 1.85 | 0.06 | -2.78 |
| IPI00292530 | Inter-alpha-trypsin inhibitor heavy chain H1 precursor        | R.NHM*QYEIVIK.V                     | 2 | 2.46 | 0.27 | -2.80 |
| IPI00292530 | Inter-alpha-trypsin inhibitor heavy chain H1 precursor        | R.NHM*QYEIVIK.V                     | 3 | 3.85 | 0.20 | -1.38 |
| IPI00292530 | Inter-alpha-trypsin inhibitor heavy chain H1 precursor        | R.QAVDTAVDGVFIR.S                   | 2 | 4.41 | 0.46 | -2.76 |
| IPI00292530 | Inter-alpha-trypsin inhibitor heavy chain H1 precursor        | R.QAVDTAVDGVFIR.S                   | 3 | 3.69 | 0.29 | -1.55 |
| IPI00292530 | Inter-alpha-trypsin inhibitor heavy chain H1 precursor        | R.TM*EQFTIHLTVNPQSK.V               | 2 | 3.79 | 0.38 | -3.65 |
| IPI00292530 | Inter-alpha-trypsin inhibitor heavy chain H1 precursor        | R.TM*EQFTIHLTVNPQSK.V               | 3 | 3.17 | 0.33 | -4.69 |
| IPI00292550 | Isoform 1 of Polypeptide N-acetylgalactosaminyltransferase 13 | K.ATPYTFPGGTGHVINK.N                | 2 | 3.15 | 0.25 | -3.67 |
| IPI00292550 | Isoform 1 of Polypeptide N-acetylgalactosaminyltransferase 13 | K.AVLIPKDDQEK.M                     | 2 | 2.38 | 0.12 | -1.76 |
| IPI00292550 | Isoform 1 of Polypeptide N-acetylgalactosaminyltransferase 13 | K.VDYGDVSVRK.T                      | 2 | 2.92 | 0.41 | -1.24 |
| IPI00292550 | Isoform 1 of Polypeptide N-acetylgalactosaminyltransferase 13 | R.GNQLWEYDAER.L                     | 2 | 3.42 | 0.36 | -2.54 |
| IPI00292550 | Isoform 1 of Polypeptide N-acetylgalactosaminyltransferase 13 | R.RYYSLGEIR.N                       | 2 | 2.54 | 0.05 | -2.09 |
| IPI00292550 | Isoform 1 of Polypeptide N-acetylgalactosaminyltransferase 13 | R.SPHYLLSEVILVDDASERDFLK.L          | 4 | 3.22 | 0.28 | -3.08 |



|             |                                                               |                                   |   |      |      |       |
|-------------|---------------------------------------------------------------|-----------------------------------|---|------|------|-------|
| IPI00292550 | Isoform 1 of Polypeptide N-acetylgalactosaminyltransferase 13 | R.TDDLCLDVSR.L                    | 2 | 3.38 | 0.33 | -2.49 |
| IPI00292550 | Isoform 1 of Polypeptide N-acetylgalactosaminyltransferase 13 | R.TPTM*AGGLFSIDR.D                | 2 | 3.02 | 0.45 | -3.90 |
| IPI00292550 | Isoform 1 of Polypeptide N-acetylgalactosaminyltransferase 13 | R.TVYSVINR.S                      | 2 | 1.79 | 0.07 | -2.20 |
| IPI00292550 | Isoform 1 of Polypeptide N-acetylgalactosaminyltransferase 13 | R.YYSLGEIR.N                      | 2 | 2.01 | 0.08 | -1.87 |
| IPI00292657 | NADP-dependent leukotriene B4 12-hydroxydehydrogenase         | K.EGDTM*M*GQQVAK.V                | 2 | 2.27 | 0.25 | -3.66 |
| IPI00292657 | NADP-dependent leukotriene B4 12-hydroxydehydrogenase         | R.LKEGDTM*M*GQQVAK.V              | 3 | 2.48 | 0.28 | -1.26 |
| IPI00292732 | fibromodulin precursor                                        | K.IPPVNTNLENLYLQGNR.I             | 2 | 4.97 | 0.43 | -3.81 |
| IPI00292732 | fibromodulin precursor                                        | K.IPPVNTNLENLYLQGNR.I             | 3 | 3.70 | 0.28 | -3.34 |
| IPI00292732 | fibromodulin precursor                                        | K.YLPFVPSR.M                      | 2 | 1.64 | 0.17 | -1.90 |
| IPI00292732 | fibromodulin precursor                                        | R.DCPQECDCPPNFPTAM*YCDNR.N        | 3 | 5.34 | 0.40 |       |
| IPI00292732 | fibromodulin precursor                                        | R.KVPDGLPSALEQLYM*EHNNVYTVPSYFR.G | 3 | 3.14 | 0.28 | -1.55 |
| IPI00292732 | fibromodulin precursor                                        | R.LDGNEIKR.S                      | 2 | 2.85 | 0.21 | -2.63 |
| IPI00292732 | fibromodulin precursor                                        | R.SAM*PADAPLCLR.L                 | 2 | 2.25 | 0.13 | -2.74 |
| IPI00292732 | fibromodulin precursor                                        | R.SLILLDLSYNHLR.K                 | 2 | 3.41 | 0.24 |       |
| IPI00292732 | fibromodulin precursor                                        | T.NLENLYLQGNR.I                   | 2 | 3.28 | 0.35 | -1.61 |
| IPI00292791 | Contactin-3 precursor                                         | G.ELLQGPVFIKEPSNSIFPVGSEDKK.I     | 3 | 4.48 | 0.43 | -3.58 |
| IPI00292791 | Contactin-3 precursor                                         | K.ATTGGGDGTSSEQIRIPR.I            | 3 | 1.85 | 0.20 | -1.48 |
| IPI00292791 | Contactin-3 precursor                                         | K.HGLVYSSAELK.V                   | 2 | 3.34 | 0.42 | -0.44 |
| IPI00292791 | Contactin-3 precursor                                         | K.IEVQFPETLPAAK.G                 | 2 | 4.02 | 0.36 | -2.25 |
| IPI00292791 | Contactin-3 precursor                                         | K.IGGGEPSPSEK.V                   | 2 | 2.51 | 0.25 | -3.63 |
| IPI00292791 | Contactin-3 precursor                                         | K.LECFALGNPIPQINWR.R              | 2 | 4.27 | 0.34 | -4.73 |
| IPI00292791 | Contactin-3 precursor                                         | K.LNGGNLVVINPNR.N                 | 2 | 2.87 | 0.32 | -1.93 |
| IPI00292791 | Contactin-3 precursor                                         | K.LQFAYLENFK.T                    | 2 | 4.04 | 0.37 | -2.26 |
| IPI00292791 | Contactin-3 precursor                                         | K.NGAALVLEER.T                    | 2 | 3.94 | 0.29 | -1.52 |
| IPI00292791 | Contactin-3 precursor                                         | K.VLLNWEQVK.A                     | 2 | 2.99 | 0.30 | -1.45 |
| IPI00292791 | Contactin-3 precursor                                         | R.ITSM*DAR.G                      | 2 | 1.98 | 0.18 | -2.94 |
| IPI00292791 | Contactin-3 precursor                                         | R.SDGLPFSSK.I                     | 2 | 2.64 | 0.07 | -2.33 |
| IPI00292791 | Contactin-3 precursor                                         | R.SDGVM*GEYEPK.I                  | 2 | 3.16 | 0.38 | -4.66 |
| IPI00292791 | Contactin-3 precursor                                         | R.VLGSPPLVLR.S                    | 2 | 2.32 | 0.24 | -2.12 |
| IPI00292946 | Thyroxine-binding globulin precursor                          | K.AQWANPFDPSTEDSSSFLIDK.T         | 2 | 4.13 | 0.46 | -3.11 |
| IPI00292946 | Thyroxine-binding globulin precursor                          | K.AQWANPFDPSTEDSSSFLIDK.T         | 3 | 2.64 | 0.29 | -4.87 |
| IPI00292946 | Thyroxine-binding globulin precursor                          | K.AVLHIGEK.G                      | 2 | 2.54 | 0.22 | -2.68 |
| IPI00292946 | Thyroxine-binding globulin precursor                          | K.EGQM*ESVEAAM*SSK.T              | 2 | 4.33 | 0.53 | -4.07 |
| IPI00292946 | Thyroxine-binding globulin precursor                          | K.EGQM*ESVEAAM*SSK.T              | 3 | 4.60 | 0.36 | -2.05 |
| IPI00292946 | Thyroxine-binding globulin precursor                          | K.FSISATYDLGATLLK.M               | 2 | 4.94 | 0.45 | -6.35 |
| IPI00292946 | Thyroxine-binding globulin precursor                          | K.GTEAAVPEVELSDQPENTFLHPIIQIDR.S  | 2 | 3.11 | 0.41 | -3.97 |

|             |                                                                  |                                     |   |      |      |       |
|-------------|------------------------------------------------------------------|-------------------------------------|---|------|------|-------|
| IPI00292946 | Thyroxine-binding globulin precursor                             | K.GTEAAVPEVELSDQPENTFLHPIQIDR.S     | 3 | 4.04 | 0.49 | -3.74 |
| IPI00292946 | Thyroxine-binding globulin precursor                             | K.M*GIQHAYSENADFSGLTEDNGLK.L        | 2 | 5.52 | 0.56 | -1.10 |
| IPI00292946 | Thyroxine-binding globulin precursor                             | K.M*GIQHAYSENADFSGLTEDNGLK.L        | 3 | 5.96 | 0.43 | -1.96 |
| IPI00292946 | Thyroxine-binding globulin precursor                             | K.M*GIQHAYSENADFSGLTEDNGLKLSNAAHK.A | 4 | 4.92 | 0.46 | -3.62 |
| IPI00292946 | Thyroxine-binding globulin precursor                             | K.M*SSINADFAFNLYR.R                 | 2 | 4.90 | 0.55 | -4.59 |
| IPI00292946 | Thyroxine-binding globulin precursor                             | K.NALALFVLPK.E                      | 1 | 2.18 | 0.09 | -4.04 |
| IPI00292946 | Thyroxine-binding globulin precursor                             | K.NALALFVLPK.E                      | 2 | 4.40 | 0.43 | -2.81 |
| IPI00292946 | Thyroxine-binding globulin precursor                             | K.NALALFVLPKEGQM*ESVEAAM*SSK.T      | 3 | 4.70 | 0.49 | -0.98 |
| IPI00292946 | Thyroxine-binding globulin precursor                             | K.QEINSHVEM*QTK.G                   | 2 | 1.95 | 0.24 | -4.14 |
| IPI00292946 | Thyroxine-binding globulin precursor                             | K.TEDSSSFLIDK.T                     | 2 | 4.17 | 0.51 | -2.03 |
| IPI00292946 | Thyroxine-binding globulin precursor                             | R.LLQKGWVDFVPK.F                    | 3 | 2.91 | 0.28 | -1.15 |
| IPI00292946 | Thyroxine-binding globulin precursor                             | R.SFM*LLILER.S                      | 2 | 3.54 | 0.30 | -3.48 |
| IPI00292946 | Thyroxine-binding globulin precursor                             | R.SFM*LLILER.S                      | 2 | 3.45 | 0.21 | -1.70 |
| IPI00292950 | Serpin peptidase inhibitor, clade D (Heparin cofactor), member 1 | F.TVDRPFLFLIYEHR.T                  | 3 | 3.94 | 0.18 | -2.73 |
| IPI00292950 | Serpin peptidase inhibitor, clade D (Heparin cofactor), member 1 | G.GSKGPLDQLEK.G                     | 2 | 3.02 | 0.28 | -2.82 |
| IPI00292950 | Serpin peptidase inhibitor, clade D (Heparin cofactor), member 1 | K.DALENIDPATQM*M*ILNCIFYK.G         | 3 | 3.00 | 0.10 |       |
| IPI00292950 | Serpin peptidase inhibitor, clade D (Heparin cofactor), member 1 | K.FKLEKYNLVESLK.L                   | 2 | 4.26 | 0.27 | -4.34 |
| IPI00292950 | Serpin peptidase inhibitor, clade D (Heparin cofactor), member 1 | K.GLIKDALENIDPATQM*M*ILNCIFYK.G     | 3 | 5.16 | 0.47 | -4.51 |
| IPI00292950 | Serpin peptidase inhibitor, clade D (Heparin cofactor), member 1 | K.GPLDQLEK.G                        | 1 | 2.14 | 0.13 | -2.54 |
| IPI00292950 | Serpin peptidase inhibitor, clade D (Heparin cofactor), member 1 | K.GPLDQLEK.G                        | 2 | 2.89 | 0.12 | -2.84 |
| IPI00292950 | Serpin peptidase inhibitor, clade D (Heparin cofactor), member 1 | K.HQGTITVNEEGTQATTVTTVGF*PLSTQVR.F  | 3 | 4.25 | 0.31 | -3.03 |
| IPI00292950 | Serpin peptidase inhibitor, clade D (Heparin cofactor), member 1 | K.NGNM*AGISDQR.I                    | 2 | 3.89 | 0.12 | -2.52 |
| IPI00292950 | Serpin peptidase inhibitor, clade D (Heparin cofactor), member 1 | K.NYNLVESLK.L                       | 1 | 3.17 | 0.17 | -3.68 |
| IPI00292950 | Serpin peptidase inhibitor, clade D (Heparin cofactor), member 1 | K.NYNLVESLK.L                       | 2 | 3.04 | 0.26 | -2.94 |
| IPI00292950 | Serpin peptidase inhibitor, clade D (Heparin cofactor), member 1 | K.QFPILLDFK.T                       | 1 | 2.22 | 0.17 | -3.25 |
| IPI00292950 | Serpin peptidase inhibitor, clade D (Heparin cofactor), member 1 | K.QFPILLDFK.T                       | 2 | 2.45 | 0.28 | -3.27 |
| IPI00292950 | Serpin peptidase inhibitor, clade D (Heparin cofactor), member 1 | K.QFPILLDFKTK.V                     | 2 | 2.86 | 0.11 | -2.99 |

|             |                                                                  |                            |   |      |      |       |
|-------------|------------------------------------------------------------------|----------------------------|---|------|------|-------|
| IPI00292950 | Serpin peptidase inhibitor, clade D (Heparin cofactor), member 1 | K.TLEAQLTPR.V              | 1 | 2.13 | 0.24 | -3.31 |
| IPI00292950 | Serpin peptidase inhibitor, clade D (Heparin cofactor), member 1 | K.TLEAQLTPR.V              | 2 | 3.44 | 0.32 | -3.05 |
| IPI00292950 | Serpin peptidase inhibitor, clade D (Heparin cofactor), member 1 | K.VREYYFAEAQIADFSDPAFISK.T | 2 | 4.62 | 0.49 | -5.11 |
| IPI00292950 | Serpin peptidase inhibitor, clade D (Heparin cofactor), member 1 | K.VREYYFAEAQIADFSDPAFISK.T | 3 | 3.69 | 0.34 | -6.18 |
| IPI00292950 | Serpin peptidase inhibitor, clade D (Heparin cofactor), member 1 | K.YEITTIHNLFR.K            | 2 | 3.51 | 0.49 | -3.80 |
| IPI00292950 | Serpin peptidase inhibitor, clade D (Heparin cofactor), member 1 | K.YEITTIHNLFR.K            | 3 | 2.96 | 0.38 | -3.35 |
| IPI00292950 | Serpin peptidase inhibitor, clade D (Heparin cofactor), member 1 | R.EVVKVSM*M*QTK.G          | 2 | 2.80 | 0.31 | -2.58 |
| IPI00292950 | Serpin peptidase inhibitor, clade D (Heparin cofactor), member 1 | R.EYYFAEAQIADFSDPAFISK.T   | 2 | 6.26 | 0.61 | -4.43 |
| IPI00292950 | Serpin peptidase inhibitor, clade D (Heparin cofactor), member 1 | R.EYYFAEAQIADFSDPAFISK.T   | 3 | 4.91 | 0.51 | -4.21 |
| IPI00292950 | Serpin peptidase inhibitor, clade D (Heparin cofactor), member 1 | R.FTVDRPFLFLIYEHR.T        | 2 | 2.49 | 0.18 | -5.40 |
| IPI00292950 | Serpin peptidase inhibitor, clade D (Heparin cofactor), member 1 | R.FTVDRPFLFLIYEHR.T        | 3 | 5.76 | 0.40 | -3.94 |
| IPI00292950 | Serpin peptidase inhibitor, clade D (Heparin cofactor), member 1 | R.FTVDRPFLFLIYEHR.T        | 4 | 3.61 | 0.28 | -2.55 |
| IPI00292950 | Serpin peptidase inhibitor, clade D (Heparin cofactor), member 1 | R.IQRLNILNAK.F             | 2 | 2.76 | 0.17 | -2.15 |
| IPI00292950 | Serpin peptidase inhibitor, clade D (Heparin cofactor), member 1 | R.M*LFDKNGNM*AGISDQR.I     | 2 | 4.15 | 0.49 | -2.94 |
| IPI00292950 | Serpin peptidase inhibitor, clade D (Heparin cofactor), member 1 | R.M*LFDKNGNM*AGISDQR.I     | 3 | 4.48 | 0.44 | -4.28 |
| IPI00292950 | Serpin peptidase inhibitor, clade D (Heparin cofactor), member 1 | R.MLFDKNGNM*AGISDQR.I      | 2 | 3.51 | 0.15 |       |
| IPI00292950 | Serpin peptidase inhibitor, clade D (Heparin cofactor), member 1 | R.NFGYTLR.S                | 1 | 2.23 | 0.18 | -2.45 |
| IPI00292950 | Serpin peptidase inhibitor, clade D (Heparin cofactor), member 1 | R.NFGYTLR.S                | 2 | 2.59 | 0.09 | -2.17 |
| IPI00292950 | Serpin peptidase inhibitor, clade D (Heparin cofactor), member 1 | R.SVNDLYIQK.Q              | 1 | 2.17 | 0.14 | -3.93 |
| IPI00292950 | Serpin peptidase inhibitor, clade D (Heparin cofactor), member 1 | R.SVNDLYIQK.Q              | 2 | 3.61 | 0.22 | -3.42 |
| IPI00292950 | Serpin peptidase inhibitor, clade D (Heparin cofactor), member 1 | R.SVNDLYIQKQFPILLDFK.T     | 2 | 3.70 | 0.30 | -2.27 |

|             |                                                                  |                                   |   |      |      |       |
|-------------|------------------------------------------------------------------|-----------------------------------|---|------|------|-------|
| IPI00292950 | Serpin peptidase inhibitor, clade D (Heparin cofactor), member 1 | R.SVNDLYIQKQFPILLDFK.T            | 3 | 4.18 | 0.38 | -3.83 |
| IPI00292950 | Serpin peptidase inhibitor, clade D (Heparin cofactor), member 1 | R.SVNDLYIQKQFPILLDFKTK.V          | 2 | 4.66 | 0.55 | -5.45 |
| IPI00292950 | Serpin peptidase inhibitor, clade D (Heparin cofactor), member 1 | R.SVNDLYIQKQFPILLDFKTK.V          | 3 | 5.23 | 0.45 | -3.62 |
| IPI00292950 | Serpin peptidase inhibitor, clade D (Heparin cofactor), member 1 | R.TSCLLFM*GR.V                    | 2 | 3.15 | 0.36 | -2.78 |
| IPI00292950 | Serpin peptidase inhibitor, clade D (Heparin cofactor), member 1 | R.TSCLLFMGR.V                     | 2 | 2.66 | 0.34 |       |
| IPI00292950 | Serpin peptidase inhibitor, clade D (Heparin cofactor), member 1 | Y.FAEAQIADFSDPAFISK.T             | 2 | 5.24 | 0.49 | -3.25 |
| IPI00292950 | Serpin peptidase inhibitor, clade D (Heparin cofactor), member 1 | Y.FAEAQIADFSDPAFISK.T             | 3 | 4.47 | 0.39 | -2.47 |
| IPI00293088 | Lysosomal alpha-glucosidase precursor                            | A.VPTQCDVPPNSR.F                  | 2 | 3.58 | 0.46 | -1.98 |
| IPI00293088 | Lysosomal alpha-glucosidase precursor                            | K.AITQEQCEAR.G                    | 2 | 2.83 | 0.28 | -2.03 |
| IPI00293088 | Lysosomal alpha-glucosidase precursor                            | L.DVM*M*ETENR.L                   | 2 | 3.18 | 0.28 | -2.86 |
| IPI00293088 | Lysosomal alpha-glucosidase precursor                            | R.AGYIPLQGGPLTTTESR.Q             | 2 | 3.03 | 0.18 | -1.87 |
| IPI00293088 | Lysosomal alpha-glucosidase precursor                            | R.APSPLYSVEFSEEPFGVIVHR.Q         | 3 | 4.69 | 0.42 | -2.89 |
| IPI00293088 | Lysosomal alpha-glucosidase precursor                            | R.GAYTQVIFLAR.N                   | 2 | 3.53 | 0.25 | -2.50 |
| IPI00293088 | Lysosomal alpha-glucosidase precursor                            | R.LDVM*M*ETENR.L                  | 2 | 3.36 | 0.40 | -3.22 |
| IPI00293088 | Lysosomal alpha-glucosidase precursor                            | R.NHNLLSLPQEPYSFSEPAQQAM*R.K      | 3 | 5.32 | 0.53 | -4.98 |
| IPI00293088 | Lysosomal alpha-glucosidase precursor                            | R.VTSEGAGLQLQK.V                  | 2 | 3.96 | 0.33 | -2.37 |
| IPI00293095 | Isoform 1 of Coiled-coil domain-containing protein 83            | R.DLMSSDESTILHLSHENSIEDLQYVK.I    | 3 | 3.20 | 0.12 |       |
| IPI00293128 | Exostosin-1                                                      | K.ASISTENFRPNFDVSIPLFSK.D         | 3 | 2.87 | 0.19 | -2.34 |
| IPI00293128 | Exostosin-1                                                      | K.IAESYQNILAAIEGSR.F              | 3 | 3.19 | 0.21 | -3.89 |
| IPI00293128 | Exostosin-1                                                      | R.LDPVLFKDQVSILR.K                | 3 | 2.87 | 0.25 | -1.28 |
| IPI00293128 | Exostosin-1                                                      | R.LLLQIPSTIR.S                    | 2 | 2.68 | 0.16 | -2.56 |
| IPI00293276 | Macrophage migration inhibitory factor                           | K.LLCGLLAER.L                     | 1 | 2.01 | 0.14 | -2.18 |
| IPI00293276 | Macrophage migration inhibitory factor                           | K.LLCGLLAER.L                     | 2 | 3.27 | 0.23 | -1.65 |
| IPI00293276 | Macrophage migration inhibitory factor                           | M.PM*FIVNTNVPR.A                  | 2 | 3.28 | 0.38 | -2.71 |
| IPI00293303 | Legumain precursor                                               | K.ASSPVPLPPVTHLDLTPSPDVPLTIM*K.R  | 3 | 4.55 | 0.46 | -4.11 |
| IPI00293303 | Legumain precursor                                               | K.DYTGEDVTPQNFLAVLR.G             | 2 | 5.26 | 0.48 | -5.29 |
| IPI00293303 | Legumain precursor                                               | K.DYTGEDVTPQNFLAVLRGDAEAVK.G      | 3 | 3.02 | 0.38 | -3.31 |
| IPI00293303 | Legumain precursor                                               | K.IVSLLAASEAEVEQLLSER.A           | 2 | 5.62 | 0.45 | -2.53 |
| IPI00293303 | Legumain precursor                                               | K.IVSLLAASEAEVEQLLSER.A           | 3 | 3.26 | 0.36 | -3.33 |
| IPI00293303 | Legumain precursor                                               | K.LM*NTNDLEESR.Q                  | 2 | 3.05 | 0.10 | -3.02 |
| IPI00293303 | Legumain precursor                                               | K.VM*QFQGM*K.R                    | 2 | 2.27 | 0.26 | -0.30 |
| IPI00293303 | Legumain precursor                                               | R.KASSPVPLPPVTHLDLTPSPDVPLTIM*K.R | 3 | 5.13 | 0.44 | -4.02 |
| IPI00293303 | Legumain precursor                                               | R.KIVSLLAASEAEVEQLLSER.A          | 3 | 2.99 | 0.23 | -4.96 |
| IPI00293361 | Isoform 2 of Small G protein signaling modulator 2               | K.M*AALFTKVGK.T                   | 2 | 1.62 | 0.08 | -2.47 |

|             |                                                                      |                                           |   |      |      |       |
|-------------|----------------------------------------------------------------------|-------------------------------------------|---|------|------|-------|
| IPI00293396 | adaptor-related protein complex 1, gamma 1 subunit isoform a         | R.TQAEEREMIQK.E                           | 2 | 1.24 | 0.05 | -7.43 |
| IPI00293460 | ATP-binding cassette sub-family A member 1                           | R.SVVLTSHSMECEALCTRM*AIMVNGR.F            | 3 | 2.91 | 0.07 | -4.39 |
| IPI00293460 | ATP-binding cassette sub-family A member 1                           | S.VVLTSHSMECEALCTRM AIMVNGR.F             | 3 | 3.75 | 0.22 | 1.10  |
| IPI00293464 | DNA damage-binding protein 1                                         | K.LVFSNVNLK.E                             | 2 | 2.32 | 0.21 | -1.76 |
| IPI00293464 | DNA damage-binding protein 1                                         | K.VTLGTQPTVLR.T                           | 2 | 2.80 | 0.23 | -1.70 |
| IPI00293464 | DNA damage-binding protein 1                                         | R.ILKLPSEFLLHK.E                          | 3 | 3.91 | 0.31 | -3.65 |
| IPI00293530 | C3a anaphylatoxin chemotactic receptor                               | K.IPSGFPIEDHETSPLDNSDAFLSTHLK.L           | 3 | 5.99 | 0.58 | -3.00 |
| IPI00293530 | C3a anaphylatoxin chemotactic receptor                               | K.IPSGFPIEDHETSPLDNSDAFLSTHLK.L           | 4 | 4.55 | 0.26 | -2.44 |
| IPI00293539 | Isoform 2 of Cadherin-11 precursor                                   | K.GKEGQVLQR.S                             | 2 | 3.14 | 0.21 | -1.81 |
| IPI00293539 | Isoform 2 of Cadherin-11 precursor                                   | K.YILSGEGAGTIFVIDDK.S                     | 2 | 2.93 | 0.29 |       |
| IPI00293539 | Isoform 2 of Cadherin-11 precursor                                   | R.VLDVNDNAPK.F                            | 2 | 2.66 | 0.16 | -1.85 |
| IPI00293679 | Isoform 1 of Potassium voltage-gated channel subfamily KQT member 4  | K.SLQTRVDQIVGRPGDR.K                      | 3 | 3.42 | 0.06 |       |
| IPI00293723 | Neurexophilin-4 precursor                                            | R.AGAAGALPAQR.T                           | 1 | 2.72 | 0.32 | -4.31 |
| IPI00293723 | Neurexophilin-4 precursor                                            | R.AGAAGALPAQR.T                           | 2 | 3.03 | 0.23 | -1.46 |
| IPI00293723 | Neurexophilin-4 precursor                                            | R.AGAAGALPAQRT.K                          | 1 | 2.01 | 0.17 | -1.96 |
| IPI00293723 | Neurexophilin-4 precursor                                            | R.AGAAGALPAQRT.K                          | 2 | 3.12 | 0.28 | -0.92 |
| IPI00293723 | Neurexophilin-4 precursor                                            | R.SSDGLGVGR.A                             | 1 | 1.61 | 0.10 | -1.89 |
| IPI00293723 | Neurexophilin-4 precursor                                            | R.SSDGLGVGR.A                             | 2 | 3.38 | 0.15 | -2.35 |
| IPI00293748 | Isoform 1 of Multiple inositol polyphosphate phosphatase 1 precursor | C.SLLEPRDPVASSLSPYFGTK.T                  | 3 | 4.36 | 0.28 | -1.91 |
| IPI00293748 | Isoform 1 of Multiple inositol polyphosphate phosphatase 1 precursor | K.DKEPLTAYNYKK.Q                          | 2 | 3.05 | 0.23 | -1.55 |
| IPI00293748 | Isoform 1 of Multiple inositol polyphosphate phosphatase 1 precursor | K.TGPEM*QNILK.K                           | 2 | 2.87 | 0.17 | -0.45 |
| IPI00293748 | Isoform 1 of Multiple inositol polyphosphate phosphatase 1 precursor | K.TGPEM*QNILK.V                           | 3 | 2.70 | 0.20 | -3.66 |
| IPI00293748 | Isoform 1 of Multiple inositol polyphosphate phosphatase 1 precursor | R.CM*DSSAFLQGLWQHYPGLPPDVADM*EFGPPTVNDK.L | 4 | 4.55 | 0.29 | -2.05 |
| IPI00293748 | Isoform 1 of Multiple inositol polyphosphate phosphatase 1 precursor | R.DPVASSLSPYFGTK.T                        | 2 | 4.34 | 0.38 | -5.10 |
| IPI00293748 | Isoform 1 of Multiple inositol polyphosphate phosphatase 1 precursor | R.GYGYTINSR.S                             | 2 | 2.85 | 0.33 | -0.64 |
| IPI00293748 | Isoform 1 of Multiple inositol polyphosphate phosphatase 1 precursor | R.LASLFPALFSR.E                           | 1 | 2.01 | 0.21 | -3.33 |
| IPI00293748 | Isoform 1 of Multiple inositol polyphosphate phosphatase 1 precursor | R.LASLFPALFSR.E                           | 2 | 2.98 | 0.24 | -2.78 |
| IPI00293748 | Isoform 1 of Multiple inositol polyphosphate phosphatase 1 precursor | R.SSCTLFQDIFQHLDK.A                       | 3 | 2.69 | 0.29 | -1.53 |
| IPI00293748 | Isoform 1 of Multiple inositol polyphosphate phosphatase 1 precursor | R.SSCTLFQDIFQHLDKAVEQK.Q                  | 3 | 3.46 | 0.28 | -4.92 |

|             |                                                                      |                                         |   |      |      |       |
|-------------|----------------------------------------------------------------------|-----------------------------------------|---|------|------|-------|
| IPI00293748 | Isoform 1 of Multiple inositol polyphosphate phosphatase 1 precursor | R.SSCTLFQDIFQHLDKAVEQK.Q                | 4 | 2.86 | 0.13 | -4.76 |
| IPI00293748 | Isoform 1 of Multiple inositol polyphosphate phosphatase 1 precursor | R.VQM*LLNEK.V                           | 2 | 2.90 | 0.09 | -0.79 |
| IPI00293757 | Isoform 1 of Netrin receptor UNC5C precursor                         | K.TFEQEPLGK.E                           | 2 | 2.88 | 0.33 | -1.81 |
| IPI00293757 | Isoform 1 of Netrin receptor UNC5C precursor                         | R.EVSIEISR.Q                            | 1 | 2.21 | 0.15 | -2.82 |
| IPI00293757 | Isoform 1 of Netrin receptor UNC5C precursor                         | R.EVSIEISR.Q                            | 2 | 1.64 | 0.11 | -2.52 |
| IPI00293757 | Isoform 1 of Netrin receptor UNC5C precursor                         | R.KTFEQEPLGK.E                          | 2 | 3.31 | 0.36 | -2.25 |
| IPI00293836 | Isoform 3 of Cell adhesion molecule 2 precursor                      | K.ALRDNRIELVR.A                         | 2 | 2.11 | 0.06 | -2.53 |
| IPI00293836 | Isoform 3 of Cell adhesion molecule 2 precursor                      | K.AYLTVLGVPEKPKQISGFSSPVM*EGDLM*QLTCK.T | 3 | 4.26 | 0.48 | -3.53 |
| IPI00293836 | Isoform 3 of Cell adhesion molecule 2 precursor                      | K.AYLTVLGVPEKPKQISGFSSPVM*EGDLM*QLTCK.T | 4 | 4.50 | 0.37 | -1.96 |
| IPI00293836 | Isoform 3 of Cell adhesion molecule 2 precursor                      | K.DGGELPDPDR.M                          | 2 | 3.13 | 0.31 | -3.81 |
| IPI00293836 | Isoform 3 of Cell adhesion molecule 2 precursor                      | K.DGGELPDPDRM*VVSGR.E                   | 3 | 1.88 | 0.20 | -3.43 |
| IPI00293836 | Isoform 3 of Cell adhesion molecule 2 precursor                      | K.IIPSTPFPQEGQPLILTCESK.G               | 2 | 3.84 | 0.41 | -5.56 |
| IPI00293836 | Isoform 3 of Cell adhesion molecule 2 precursor                      | K.IIPSTPFPQEGQPLILTCESK.G               | 3 | 3.75 | 0.37 | -5.43 |
| IPI00293836 | Isoform 3 of Cell adhesion molecule 2 precursor                      | K.TFTVSSTLDFR.V                         | 2 | 3.54 | 0.49 | -4.60 |
| IPI00293836 | Isoform 3 of Cell adhesion molecule 2 precursor                      | K.TSGSKPAADIR.W                         | 1 | 1.61 | 0.20 | -3.66 |
| IPI00293836 | Isoform 3 of Cell adhesion molecule 2 precursor                      | K.TSGSKPAADIR.W                         | 2 | 3.16 | 0.22 | -1.65 |
| IPI00293836 | Isoform 3 of Cell adhesion molecule 2 precursor                      | K.YLKEEDANR.K                           | 2 | 3.09 | 0.20 | -2.65 |
| IPI00293836 | Isoform 3 of Cell adhesion molecule 2 precursor                      | K.YLKEEDANRK.T                          | 2 | 2.71 | 0.19 | -3.23 |
| IPI00293836 | Isoform 3 of Cell adhesion molecule 2 precursor                      | K.YLKEEDANRK.T                          | 3 | 3.41 | 0.25 | -3.72 |
| IPI00293836 | Isoform 3 of Cell adhesion molecule 2 precursor                      | R.ELNILFLNK.T                           | 2 | 2.70 | 0.16 | -3.82 |
| IPI00293836 | Isoform 3 of Cell adhesion molecule 2 precursor                      | R.KTFTVSSTLDFR.V                        | 3 | 1.97 | 0.20 | -3.60 |
| IPI00293836 | Isoform 3 of Cell adhesion molecule 2 precursor                      | R.SDDGVAVICR.V                          | 1 | 2.56 | 0.23 | -3.65 |
| IPI00293836 | Isoform 3 of Cell adhesion molecule 2 precursor                      | R.SDDGVAVICR.V                          | 2 | 3.55 | 0.32 | -3.24 |
| IPI00293836 | Isoform 3 of Cell adhesion molecule 2 precursor                      | R.VDHESLNATPQVAM*QVLEIHYPSTSVK.I        | 3 | 4.89 | 0.49 | -3.72 |
| IPI00293849 | Receptor-type tyrosine-protein phosphatase mu precursor              | K.AVSSFDPEIDLNSQSGR.V                   | 2 | 5.07 | 0.45 | -3.84 |
| IPI00293849 | Receptor-type tyrosine-protein phosphatase mu precursor              | K.GFGPPATNQFTTK.I                       | 2 | 4.06 | 0.43 | -1.39 |
| IPI00293849 | Receptor-type tyrosine-protein phosphatase mu precursor              | K.SNSPPGLLNYYVK.V                       | 2 | 3.26 | 0.43 | -2.52 |
| IPI00293925 | Isoform 1 of Ficolin-3 precursor                                     | K.YGIDWASGR.G                           | 2 | 2.73 | 0.21 | -2.12 |
| IPI00293925 | Isoform 1 of Ficolin-3 precursor                                     | R.ALPVFCDM*DTEGGGWLVFQR.R               | 2 | 4.27 | 0.50 | -8.17 |
| IPI00293925 | Isoform 1 of Ficolin-3 precursor                                     | R.ALPVFCDM*DTEGGGWLVFQR.R               | 3 | 4.12 | 0.44 | -5.16 |
| IPI00293925 | Isoform 1 of Ficolin-3 precursor                                     | R.LLGEVDHYQLALGK.F                      | 2 | 3.79 | 0.38 | -1.02 |
| IPI00293925 | Isoform 1 of Ficolin-3 precursor                                     | R.TFAHYATFR.L                           | 2 | 2.69 | 0.25 | -3.71 |
| IPI00293971 | Sodium/potassium-transporting ATPase subunit beta-2                  | R.INAANIATDDER.D                        | 2 | 3.82 | 0.43 | -3.15 |
| IPI00293971 | Sodium/potassium-transporting ATPase subunit beta-2                  | R.INAANIATDDERD.K                       | 2 | 3.65 | 0.19 | -2.46 |

|             |                                                                     |                                   |   |      |      |       |
|-------------|---------------------------------------------------------------------|-----------------------------------|---|------|------|-------|
| IPI00293971 | Sodium/potassium-transporting ATPase subunit beta-2                 | R.INAANIATDDERDKFAGR.V            | 2 | 3.89 | 0.32 | -3.80 |
| IPI00293971 | Sodium/potassium-transporting ATPase subunit beta-2                 | R.INAANIATDDERDKFAGR.V            | 3 | 2.98 | 0.19 | -2.38 |
| IPI00293971 | Sodium/potassium-transporting ATPase subunit beta-2                 | R.INAANIATDDERDKFAGR.V            | 4 | 2.56 | 0.32 | -1.49 |
| IPI00294004 | Vitamin K-dependent protein S precursor                             | K.ASFTCTCKPGWQGEK.C               | 2 | 3.83 | 0.33 |       |
| IPI00294004 | Vitamin K-dependent protein S precursor                             | K.DCKDVDECSLKPSICGTAVCK.N         | 2 | 4.96 | 0.32 |       |
| IPI00294004 | Vitamin K-dependent protein S precursor                             | K.DCKDVDECSLKPSICGTAVCK.N         | 3 | 3.74 | 0.19 |       |
| IPI00294004 | Vitamin K-dependent protein S precursor                             | K.DVDECSLKPSICGTAVCK.N            | 2 | 3.58 | 0.46 |       |
| IPI00294004 | Vitamin K-dependent protein S precursor                             | K.EAVM*DINKPGPLFKPENGLLET.K.V     | 2 | 3.34 | 0.15 |       |
| IPI00294004 | Vitamin K-dependent protein S precursor                             | K.EAVM*DINKPGPLFKPENGLLET.K.V     | 3 | 3.55 | 0.36 | -3.93 |
| IPI00294004 | Vitamin K-dependent protein S precursor                             | K.EAVM*DINKPGPLFKPENGLLET.K.V     | 4 | 2.74 | 0.33 | -1.67 |
| IPI00294004 | Vitamin K-dependent protein S precursor                             | K.HCLVTVEK.G                      | 2 | 2.86 | 0.16 |       |
| IPI00294004 | Vitamin K-dependent protein S precursor                             | K.IEVQLKNEHTSK.I                  | 2 | 3.18 | 0.27 | -2.84 |
| IPI00294004 | Vitamin K-dependent protein S precursor                             | K.ITTGGDVINNGLWNM*VSVEELEHSISIK.I | 3 | 3.08 | 0.12 | -3.21 |
| IPI00294004 | Vitamin K-dependent protein S precursor                             | K.SQDILLSVENTVIYR.I               | 2 | 2.25 | 0.10 | -3.34 |
| IPI00294004 | Vitamin K-dependent protein S precursor                             | K.VYFAGFPR.K                      | 1 | 1.88 | 0.20 | -1.52 |
| IPI00294004 | Vitamin K-dependent protein S precursor                             | K.VYFAGFPR.K                      | 2 | 3.10 | 0.20 | -1.52 |
| IPI00294004 | Vitamin K-dependent protein S precursor                             | R.FSAEFDLR.T                      | 2 | 3.05 | 0.15 | -3.27 |
| IPI00294004 | Vitamin K-dependent protein S precursor                             | R.IQALSLSQDQSHLEFR.V              | 2 | 5.35 | 0.47 |       |
| IPI00294004 | Vitamin K-dependent protein S precursor                             | R.IQALSLSQDQSHLEFR.V              | 3 | 2.77 | 0.23 | -2.18 |
| IPI00294004 | Vitamin K-dependent protein S precursor                             | R.KVESELIKPINPR.L                 | 2 | 4.29 | 0.37 | -4.11 |
| IPI00294004 | Vitamin K-dependent protein S precursor                             | R.KVESELIKPINPR.L                 | 3 | 2.91 | 0.23 | -2.23 |
| IPI00294004 | Vitamin K-dependent protein S precursor                             | R.NNLELSTPLK.I                    | 2 | 2.82 | 0.15 | -1.85 |
| IPI00294004 | Vitamin K-dependent protein S precursor                             | R.NNLELSTPLKIETISHEDLQR.Q         | 2 | 3.95 | 0.30 |       |
| IPI00294004 | Vitamin K-dependent protein S precursor                             | R.NNLELSTPLKIETISHEDLQR.Q         | 3 | 4.42 | 0.41 | -3.77 |
| IPI00294004 | Vitamin K-dependent protein S precursor                             | R.QLAVLDK.A                       | 1 | 1.66 | 0.09 | -2.85 |
| IPI00294004 | Vitamin K-dependent protein S precursor                             | R.QSTNAYPDLR.S                    | 2 | 2.54 | 0.15 | -1.46 |
| IPI00294004 | Vitamin K-dependent protein S precursor                             | R.SCVNAIPDQCSPPCNEDGYM*SCKDGGK.A  | 3 | 3.72 | 0.39 | -2.21 |
| IPI00294004 | Vitamin K-dependent protein S precursor                             | R.SFQTGLFTAAR.Q                   | 1 | 2.04 | 0.35 | -3.06 |
| IPI00294004 | Vitamin K-dependent protein S precursor                             | R.SFQTGLFTAAR.Q                   | 2 | 4.28 | 0.43 | -2.15 |
| IPI00294004 | Vitamin K-dependent protein S precursor                             | R.VNRNNLELSTPLK.I                 | 2 | 2.82 | 0.22 | 0.24  |
| IPI00294004 | Vitamin K-dependent protein S precursor                             | R.VNRNNLELSTPLKIETISHEDLQR.Q      | 3 | 6.52 | 0.51 | -4.23 |
| IPI00294004 | Vitamin K-dependent protein S precursor                             | R.VNRNNLELSTPLKIETISHEDLQR.Q      | 4 | 4.83 | 0.46 | -2.16 |
| IPI00294193 | Isoform 1 of Inter-alpha-trypsin inhibitor heavy chain H4 precursor | A.EKNGIDIYSLTVDSR.V               | 2 | 4.52 | 0.51 | -2.76 |
| IPI00294193 | Isoform 1 of Inter-alpha-trypsin inhibitor heavy chain H4 precursor | K.AEAQAQYSAAVAK.G                 | 1 | 3.20 | 0.31 | -3.17 |
| IPI00294193 | Isoform 1 of Inter-alpha-trypsin inhibitor heavy chain H4 precursor | K.AEAQAQYSAAVAK.G                 | 2 | 4.88 | 0.46 | -5.13 |

|             |                                                                     |                                        |   |      |      |       |
|-------------|---------------------------------------------------------------------|----------------------------------------|---|------|------|-------|
| IPI00294193 | Isoform 1 of Inter-alpha-trypsin inhibitor heavy chain H4 precursor | K.AGFSWIEVTFK.N                        | 2 | 3.83 | 0.37 | -3.40 |
| IPI00294193 | Isoform 1 of Inter-alpha-trypsin inhibitor heavy chain H4 precursor | K.EKAEAAQYSAAVAK.G                     | 2 | 4.70 | 0.52 | -3.59 |
| IPI00294193 | Isoform 1 of Inter-alpha-trypsin inhibitor heavy chain H4 precursor | K.EKAEAAQYSAAVAK.G                     | 3 | 2.95 | 0.20 | -1.30 |
| IPI00294193 | Isoform 1 of Inter-alpha-trypsin inhibitor heavy chain H4 precursor | K.ETLFSVM*PGLK.M                       | 2 | 3.05 | 0.37 | -2.95 |
| IPI00294193 | Isoform 1 of Inter-alpha-trypsin inhibitor heavy chain H4 precursor | K.GSEM*VVAGK.L                         | 1 | 2.36 | 0.16 | -2.42 |
| IPI00294193 | Isoform 1 of Inter-alpha-trypsin inhibitor heavy chain H4 precursor | K.GSEM*VVAGK.L                         | 2 | 3.20 | 0.25 | -3.04 |
| IPI00294193 | Isoform 1 of Inter-alpha-trypsin inhibitor heavy chain H4 precursor | K.ILDDLSPRDQFNLIWFSTQWRPSLVPASAENVNK.A | 4 | 3.61 | 0.24 | -3.03 |
| IPI00294193 | Isoform 1 of Inter-alpha-trypsin inhibitor heavy chain H4 precursor | K.ITFELVYEELLK.R                       | 2 | 4.90 | 0.43 | -6.82 |
| IPI00294193 | Isoform 1 of Inter-alpha-trypsin inhibitor heavy chain H4 precursor | K.ITFELVYEELLKR.R                      | 2 | 3.24 | 0.31 | -3.11 |
| IPI00294193 | Isoform 1 of Inter-alpha-trypsin inhibitor heavy chain H4 precursor | K.ITFELVYEELLKR.R                      | 3 | 2.51 | 0.18 | -4.10 |
| IPI00294193 | Isoform 1 of Inter-alpha-trypsin inhibitor heavy chain H4 precursor | K.LALDNGGLAR.R                         | 1 | 2.35 | 0.24 | -3.22 |
| IPI00294193 | Isoform 1 of Inter-alpha-trypsin inhibitor heavy chain H4 precursor | K.LALDNGGLAR.R                         | 2 | 3.38 | 0.30 | -2.67 |
| IPI00294193 | Isoform 1 of Inter-alpha-trypsin inhibitor heavy chain H4 precursor | K.LQDRGPDVLTATVSGK.L                   | 2 | 4.29 | 0.52 | -2.31 |
| IPI00294193 | Isoform 1 of Inter-alpha-trypsin inhibitor heavy chain H4 precursor | K.LQDRGPDVLTATVSGK.L                   | 3 | 4.37 | 0.31 | -3.49 |
| IPI00294193 | Isoform 1 of Inter-alpha-trypsin inhibitor heavy chain H4 precursor | K.NGIDIYSLTVDSR.V                      | 2 | 4.00 | 0.40 | -2.27 |
| IPI00294193 | Isoform 1 of Inter-alpha-trypsin inhibitor heavy chain H4 precursor | K.NPLVWVHASPEHVVVTR.N                  | 3 | 5.38 | 0.52 | -5.11 |
| IPI00294193 | Isoform 1 of Inter-alpha-trypsin inhibitor heavy chain H4 precursor | K.NVVFVIDK.S                           | 1 | 2.65 | 0.17 | -3.16 |
| IPI00294193 | Isoform 1 of Inter-alpha-trypsin inhibitor heavy chain H4 precursor | K.NVVFVIDK.S                           | 2 | 2.33 | 0.25 | -2.47 |
| IPI00294193 | Isoform 1 of Inter-alpha-trypsin inhibitor heavy chain H4 precursor | K.NVVFVIDKSGSM*SGR.K                   | 2 | 3.23 | 0.30 | -0.83 |
| IPI00294193 | Isoform 1 of Inter-alpha-trypsin inhibitor heavy chain H4 precursor | K.NVVFVIDKSGSM*SGR.K                   | 3 | 2.51 | 0.33 | 0.12  |
| IPI00294193 | Isoform 1 of Inter-alpha-trypsin inhibitor heavy chain H4 precursor | K.NVVFVIDKSGSM*SGRK.I                  | 3 | 2.46 | 0.25 | -2.31 |



|             |                                                                     |                                       |   |      |      |       |
|-------------|---------------------------------------------------------------------|---------------------------------------|---|------|------|-------|
| IPI00294193 | Isoform 1 of Inter-alpha-trypsin inhibitor heavy chain H4 precursor | K.SPEQQETVLDGNLIIR.Y                  | 2 | 5.01 | 0.44 | -6.49 |
| IPI00294193 | Isoform 1 of Inter-alpha-trypsin inhibitor heavy chain H4 precursor | K.SPEQQETVLDGNLIIR.Y                  | 3 | 4.19 | 0.20 | -4.28 |
| IPI00294193 | Isoform 1 of Inter-alpha-trypsin inhibitor heavy chain H4 precursor | K.TGLLLSDDPKVTIGLLFWDGR.G             | 3 | 2.86 | 0.28 | -4.01 |
| IPI00294193 | Isoform 1 of Inter-alpha-trypsin inhibitor heavy chain H4 precursor | K.TGLLLSDDPKVTIGLLFWDGRGEGLR.L        | 4 | 3.72 | 0.15 | -1.76 |
| IPI00294193 | Isoform 1 of Inter-alpha-trypsin inhibitor heavy chain H4 precursor | K.WKETLFSVM*PGLK.M                    | 2 | 4.00 | 0.38 | -2.92 |
| IPI00294193 | Isoform 1 of Inter-alpha-trypsin inhibitor heavy chain H4 precursor | K.WKETLFSVM*PGLK.M                    | 3 | 4.12 | 0.26 | -2.35 |
| IPI00294193 | Isoform 1 of Inter-alpha-trypsin inhibitor heavy chain H4 precursor | K.YIFHNFN*ER.L                        | 2 | 2.20 | 0.19 | -0.59 |
| IPI00294193 | Isoform 1 of Inter-alpha-trypsin inhibitor heavy chain H4 precursor | R.AISGGSIQIENGYFVHYFAPEGLTMM*PK.N     | 2 | 4.26 | 0.53 | -2.44 |
| IPI00294193 | Isoform 1 of Inter-alpha-trypsin inhibitor heavy chain H4 precursor | R.AISGGSIQIENGYFVHYFAPEGLTMM*PK.N     | 3 | 5.62 | 0.55 | -4.13 |
| IPI00294193 | Isoform 1 of Inter-alpha-trypsin inhibitor heavy chain H4 precursor | R.ANTVQEATFQM*ELPK.K                  | 2 | 5.10 | 0.41 | -4.19 |
| IPI00294193 | Isoform 1 of Inter-alpha-trypsin inhibitor heavy chain H4 precursor | R.ANTVQEATFQM*ELPKK.A                 | 2 | 4.67 | 0.47 | -3.41 |
| IPI00294193 | Isoform 1 of Inter-alpha-trypsin inhibitor heavy chain H4 precursor | R.ANTVQEATFQMELPK.K                   | 2 | 2.99 | 0.34 |       |
| IPI00294193 | Isoform 1 of Inter-alpha-trypsin inhibitor heavy chain H4 precursor | R.DQFNLIIVFSTEATQWRPSLVPASAENVNK.A    | 2 | 2.36 | 0.40 | -1.90 |
| IPI00294193 | Isoform 1 of Inter-alpha-trypsin inhibitor heavy chain H4 precursor | R.DQFNLIIVFSTEATQWRPSLVPASAENVNK.A    | 3 | 6.22 | 0.54 | -3.80 |
| IPI00294193 | Isoform 1 of Inter-alpha-trypsin inhibitor heavy chain H4 precursor | R.DQFNLIIVFSTEATQWRPSLVPASAENVNK.A    | 4 | 6.02 | 0.46 | -3.05 |
| IPI00294193 | Isoform 1 of Inter-alpha-trypsin inhibitor heavy chain H4 precursor | R.DTDRFSSHVGGTLGQFYQEVWLGSPAASDDGRR.T | 5 | 3.34 | 0.21 | -2.57 |
| IPI00294193 | Isoform 1 of Inter-alpha-trypsin inhibitor heavy chain H4 precursor | R.FAHTVVTSR.V                         | 1 | 2.67 | 0.27 | -4.67 |
| IPI00294193 | Isoform 1 of Inter-alpha-trypsin inhibitor heavy chain H4 precursor | R.FAHTVVTSR.V                         | 2 | 2.70 | 0.32 | -2.52 |
| IPI00294193 | Isoform 1 of Inter-alpha-trypsin inhibitor heavy chain H4 precursor | R.FKPTLSQQQK.S                        | 2 | 2.83 | 0.27 | -3.54 |
| IPI00294193 | Isoform 1 of Inter-alpha-trypsin inhibitor heavy chain H4 precursor | R.FKPTLSQQQK.S                        | 3 | 3.30 | 0.14 | -5.23 |
| IPI00294193 | Isoform 1 of Inter-alpha-trypsin inhibitor heavy chain H4 precursor | R.FSSHVGGTLGQFYQEVWLGSPAASDDGRR.T     | 3 | 3.72 | 0.39 | -4.40 |

|             |                                                                     |                                         |   |      |      |       |
|-------------|---------------------------------------------------------------------|-----------------------------------------|---|------|------|-------|
| IPI00294193 | Isoform 1 of Inter-alpha-trypsin inhibitor heavy chain H4 precursor | R.GPDVLTATVSGK.L                        | 1 | 2.08 | 0.17 | -3.32 |
| IPI00294193 | Isoform 1 of Inter-alpha-trypsin inhibitor heavy chain H4 precursor | R.GPDVLTATVSGK.L                        | 2 | 3.79 | 0.42 | -2.48 |
| IPI00294193 | Isoform 1 of Inter-alpha-trypsin inhibitor heavy chain H4 precursor | R.HRQGPVLLSDPEQGVETGQYER.E              | 3 | 5.93 | 0.53 | -1.50 |
| IPI00294193 | Isoform 1 of Inter-alpha-trypsin inhibitor heavy chain H4 precursor | R.HRQGPVLLSDPEQGVETGQYER.E              | 4 | 4.28 | 0.39 | -3.92 |
| IPI00294193 | Isoform 1 of Inter-alpha-trypsin inhibitor heavy chain H4 precursor | R.LGVYELLLK.V                           | 2 | 3.56 | 0.37 | -2.77 |
| IPI00294193 | Isoform 1 of Inter-alpha-trypsin inhibitor heavy chain H4 precursor | R.LPEGSVSLIILLTDGDPTVGETNPR.S           | 3 | 4.34 | 0.37 | -2.85 |
| IPI00294193 | Isoform 1 of Inter-alpha-trypsin inhibitor heavy chain H4 precursor | R.LWAYLTIQQLLEQTVSASDADQQALR.N          | 3 | 5.64 | 0.45 | -6.69 |
| IPI00294193 | Isoform 1 of Inter-alpha-trypsin inhibitor heavy chain H4 precursor | R.M*NFRPGVLSSR.L                        | 2 | 1.63 | 0.05 | -3.59 |
| IPI00294193 | Isoform 1 of Inter-alpha-trypsin inhibitor heavy chain H4 precursor | R.NM*EQFQVSVSVAPNAK.I                   | 2 | 4.78 | 0.45 | -2.79 |
| IPI00294193 | Isoform 1 of Inter-alpha-trypsin inhibitor heavy chain H4 precursor | R.QGPVLLSDPEQGVETGQYER.E                | 2 | 4.85 | 0.50 | -4.06 |
| IPI00294193 | Isoform 1 of Inter-alpha-trypsin inhibitor heavy chain H4 precursor | R.QGPVLLSDPEQGVETGQYER.E                | 3 | 4.86 | 0.43 | -4.91 |
| IPI00294193 | Isoform 1 of Inter-alpha-trypsin inhibitor heavy chain H4 precursor | R.QGPVLLSDPEQGVETGQYER.EK.A             | 3 | 3.33 | 0.24 | -2.48 |
| IPI00294193 | Isoform 1 of Inter-alpha-trypsin inhibitor heavy chain H4 precursor | R.RLDYQEGPPGVEISCWSVEL.-                | 2 | 5.37 | 0.61 | -4.23 |
| IPI00294193 | Isoform 1 of Inter-alpha-trypsin inhibitor heavy chain H4 precursor | R.RLDYQEGPPGVEISCWSVEL.-                | 3 | 4.45 | 0.40 | -3.75 |
| IPI00294193 | Isoform 1 of Inter-alpha-trypsin inhibitor heavy chain H4 precursor | R.RLGVYELLLK.V                          | 2 | 2.32 | 0.09 | -1.65 |
| IPI00294193 | Isoform 1 of Inter-alpha-trypsin inhibitor heavy chain H4 precursor | R.RLGVYELLLK.V                          | 3 | 3.85 | 0.23 | -2.19 |
| IPI00294193 | Isoform 1 of Inter-alpha-trypsin inhibitor heavy chain H4 precursor | R.SFAAGIQALGGTNINDAM*LM*AVQLLDSSNQEER.L | 3 | 3.68 | 0.28 | -7.00 |
| IPI00294193 | Isoform 1 of Inter-alpha-trypsin inhibitor heavy chain H4 precursor | R.SFAAGIQALGGTNINDAM*LM*AVQLLDSSNQEER.L | 4 | 5.25 | 0.47 | -4.79 |
| IPI00294193 | Isoform 1 of Inter-alpha-trypsin inhibitor heavy chain H4 precursor | R.SIQNNVR.E                             | 1 | 1.62 | 0.12 | -4.71 |
| IPI00294193 | Isoform 1 of Inter-alpha-trypsin inhibitor heavy chain H4 precursor | W.VHASPEHVVVTR.N                        | 2 | 3.07 | 0.42 | -1.67 |
| IPI00294210 | DNA-binding protein inhibitor ID-2                                  | K.LKELVPSIPQNK.K                        | 3 | 3.39 | 0.06 |       |
| IPI00294215 | Uncharacterized protein KIAA0232                                    | E.SSGIETLVEELCSRLK.D                    | 2 | 2.93 | 0.21 | -9.00 |

|             |                                              |                                                |   |      |      |       |
|-------------|----------------------------------------------|------------------------------------------------|---|------|------|-------|
| IPI00294395 | Complement component C8 beta chain precursor | K.CQHEM*DQYWGIGSLASGINLFTNSFEGPVLDRH.Y         | 4 | 3.76 | 0.21 | -2.07 |
| IPI00294395 | Complement component C8 beta chain precursor | K.EYESYDFERNVTEKM*ASKSGFSFGFK.I                | 4 | 2.22 | 0.20 | 0.55  |
| IPI00294395 | Complement component C8 beta chain precursor | K.IPGIFELGISSQSDR.G                            | 2 | 4.72 | 0.57 | -4.43 |
| IPI00294395 | Complement component C8 beta chain precursor | K.IPGIFELGISSQSDR.G                            | 3 | 3.30 | 0.23 | -2.90 |
| IPI00294395 | Complement component C8 beta chain precursor | K.QALEEFQK.E                                   | 1 | 1.51 | 0.06 | -3.73 |
| IPI00294395 | Complement component C8 beta chain precursor | K.RLPLEYSYGEYR.D                               | 2 | 2.68 | 0.30 | -3.66 |
| IPI00294395 | Complement component C8 beta chain precursor | K.RLPLEYSYGEYRDLFR.D                           | 2 | 3.30 | 0.36 | -2.91 |
| IPI00294395 | Complement component C8 beta chain precursor | K.RLPLEYSYGEYRDLFR.D                           | 3 | 2.27 | 0.13 | -2.76 |
| IPI00294395 | Complement component C8 beta chain precursor | K.SGFSFGFK.I                                   | 2 | 2.25 | 0.22 | -2.52 |
| IPI00294395 | Complement component C8 beta chain precursor | K.VEPLYELVTATDFAYSSTVR.Q                       | 2 | 5.33 | 0.55 | -6.71 |
| IPI00294395 | Complement component C8 beta chain precursor | K.VEPLYELVTATDFAYSSTVR.Q                       | 3 | 3.79 | 0.35 | -5.51 |
| IPI00294395 | Complement component C8 beta chain precursor | K.VKVEPLYELVTATDFAYSSTVR.Q                     | 2 | 5.47 | 0.53 | -2.52 |
| IPI00294395 | Complement component C8 beta chain precursor | K.VKVEPLYELVTATDFAYSSTVR.Q                     | 3 | 4.51 | 0.48 | -6.32 |
| IPI00294395 | Complement component C8 beta chain precursor | R.CEGFVCAQTGR.C                                | 2 | 4.33 | 0.45 | -1.48 |
| IPI00294395 | Complement component C8 beta chain precursor | R.DFGTHYTEAVLGGIYEYTLVM*NK.E                   | 3 | 3.67 | 0.31 | -4.54 |
| IPI00294395 | Complement component C8 beta chain precursor | R.DTM*VEDLVVLR.G                               | 2 | 3.81 | 0.31 | -3.48 |
| IPI00294395 | Complement component C8 beta chain precursor | R.DTM*VEDLVVLR.G                               | 3 | 3.63 | 0.13 | -3.11 |
| IPI00294395 | Complement component C8 beta chain precursor | R.FRKPYNVESYTPQTQGK.Y                          | 2 | 3.99 | 0.37 | -3.29 |
| IPI00294395 | Complement component C8 beta chain precursor | R.FRKPYNVESYTPQTQGK.Y                          | 3 | 5.17 | 0.42 | -2.03 |
| IPI00294395 | Complement component C8 beta chain precursor | R.GDYTLNNVHACAK.N                              | 2 | 3.57 | 0.40 | 2.11  |
| IPI00294395 | Complement component C8 beta chain precursor | R.GGASEHITTLAYQELPTADLM*QEWGDAVQYNPAIIK.V      | 3 | 6.60 | 0.55 | -4.23 |
| IPI00294395 | Complement component C8 beta chain precursor | R.GGASEHITTLAYQELPTADLM*QEWGDAVQYNPAIIK.V      | 4 | 4.44 | 0.24 | -5.03 |
| IPI00294395 | Complement component C8 beta chain precursor | R.GILNEIKDR.N                                  | 2 | 2.64 | 0.10 | -3.99 |
| IPI00294395 | Complement component C8 beta chain precursor | R.KPYNVESYTPQTQGK.Y                            | 2 | 4.21 | 0.48 | -6.51 |
| IPI00294395 | Complement component C8 beta chain precursor | R.KPYNVESYTPQTQGK.Y                            | 3 | 2.87 | 0.15 | -2.89 |
| IPI00294395 | Complement component C8 beta chain precursor | R.KPYNVESYTPQTQGKYEFILK.E                      | 3 | 4.34 | 0.42 | -2.84 |
| IPI00294395 | Complement component C8 beta chain precursor | R.LLCNGDNDCGDQSDANCEARR.I                      | 3 | 3.84 | 0.27 |       |
| IPI00294395 | Complement component C8 beta chain precursor | R.LPLEYSYGEYR.D                                | 2 | 3.43 | 0.45 | -3.13 |
| IPI00294395 | Complement component C8 beta chain precursor | R.LPLEYSYGEYRDLFR.D                            | 2 | 2.74 | 0.22 | -2.32 |
| IPI00294395 | Complement component C8 beta chain precursor | R.LPLEYSYGEYRDLFR.D                            | 3 | 2.17 | 0.20 | -1.19 |
| IPI00294395 | Complement component C8 beta chain precursor | R.SDLEVAHYK.L                                  | 1 | 2.17 | 0.31 | -3.17 |
| IPI00294395 | Complement component C8 beta chain precursor | R.SDLEVAHYK.L                                  | 2 | 2.88 | 0.30 | -2.22 |
| IPI00294395 | Complement component C8 beta chain precursor | R.SLM*LHYEFLQR.V                               | 2 | 3.40 | 0.34 | -4.39 |
| IPI00294395 | Complement component C8 beta chain precursor | R.SLM*LHYEFLQR.V                               | 3 | 3.21 | 0.28 | -1.69 |
| IPI00294519 | Isoform 1 of Telomerase protein component 1  | K.KANTPETQTPGTDPPSTCRESDASM*DSDASM*DSEPTPHLK.T | 3 | 2.32 | 0.06 | -1.88 |
| IPI00294615 | Fibulin-5 precursor                          | R.CM*CPAENPGCR.D                               | 2 | 2.82 | 0.31 |       |
| IPI00294615 | Fibulin-5 precursor                          | R.DM*DVVSGR.S                                  | 2 | 2.54 | 0.14 | -3.37 |
| IPI00294615 | Fibulin-5 precursor                          | R.SVPADIFQM*QATTR.Y                            | 2 | 2.36 | 0.14 |       |
| IPI00294615 | Fibulin-5 precursor                          | R.TIPEACRGDM*M*CVNQNGGYLCIPR.T                 | 3 | 4.45 | 0.23 |       |
| IPI00294615 | Fibulin-5 precursor                          | R.YPGAYYIFQIK.S                                | 2 | 3.30 | 0.16 |       |
| IPI00294619 | Protein TFG                                  | G.LTDDQVSGPPSAPAEDR.S                          | 2 | 4.75 | 0.53 | -3.50 |
| IPI00294619 | Protein TFG                                  | L.TDDQVSGPPSAPAEDR.S                           | 2 | 3.92 | 0.48 | -3.25 |

|             |                                                                |                                   |   |      |      |       |
|-------------|----------------------------------------------------------------|-----------------------------------|---|------|------|-------|
| IPI00294705 | Papilin                                                        | K.GENFYK.H                        | 2 | 1.85 | 0.06 | -1.31 |
| IPI00294705 | Papilin                                                        | R.GAEGDLAPER.L                    | 2 | 2.36 | 0.19 | -2.20 |
| IPI00294705 | Papilin                                                        | R.GPTSEPLVIELISQEPNPGVHYEYHLPLR.R | 4 | 4.64 | 0.28 | -4.52 |
| IPI00294705 | Papilin                                                        | R.GYNQILIVPM*GATSILIDEAAASR.N     | 2 | 3.05 | 0.25 | -3.38 |
| IPI00294705 | Papilin                                                        | R.GYNQILIVPM*GATSILIDEAAASR.N     | 3 | 4.02 | 0.35 | -5.72 |
| IPI00294705 | Papilin                                                        | R.ISLAGVEPSLVQAALGQLVR.L          | 2 | 5.48 | 0.51 | -4.19 |
| IPI00294705 | Papilin                                                        | R.ISLAGVEPSLVQAALGQLVR.L          | 3 | 4.19 | 0.30 | -3.62 |
| IPI00294705 | Papilin                                                        | R.LRLDQNPQR.V                     | 2 | 3.16 | 0.12 | -2.11 |
| IPI00294705 | Papilin                                                        | R.VHQSPDGTLLIYNLR.A               | 3 | 3.33 | 0.16 | -3.04 |
| IPI00294705 | Papilin                                                        | R.VVDASPGQR.I                     | 2 | 2.35 | 0.15 | -2.63 |
| IPI00294713 | Isoform 1 of Mannan-binding lectin serine protease 2 precursor | K.WPEPVFGR.L                      | 2 | 1.71 | 0.10 | -0.69 |
| IPI00294713 | Isoform 1 of Mannan-binding lectin serine protease 2 precursor | R.AGYVLHR.N                       | 2 | 2.48 | 0.25 | -3.40 |
| IPI00294834 | Aspartyl/asparaginyl beta-hydroxylase                          | K.LGIYDADGDGDFDVDDAK.V            | 2 | 6.23 | 0.56 | -5.18 |
| IPI00294834 | Aspartyl/asparaginyl beta-hydroxylase                          | K.LGIYDADGDGDFDVDDAK.V            | 3 | 4.80 | 0.31 | -2.52 |
| IPI00294834 | Aspartyl/asparaginyl beta-hydroxylase                          | K.LGIYDADGDGDFDVDDAKVLLGLK.E      | 2 | 5.19 | 0.61 | -2.10 |
| IPI00294834 | Aspartyl/asparaginyl beta-hydroxylase                          | K.LGIYDADGDGDFDVDDAKVLLGLK.E      | 3 | 4.70 | 0.47 | -2.14 |
| IPI00294834 | Aspartyl/asparaginyl beta-hydroxylase                          | K.VHYGFILK.A                      | 2 | 1.92 | 0.22 | -2.68 |
| IPI00294834 | Aspartyl/asparaginyl beta-hydroxylase                          | R.GAIETYQEVASLPDVPADLLK.L         | 2 | 4.46 | 0.33 | -5.30 |
| IPI00294834 | Aspartyl/asparaginyl beta-hydroxylase                          | R.SLVNVNGLK.A                     | 2 | 2.50 | 0.14 | -1.18 |
| IPI00294910 | Protein PARM-1 precursor                                       | R.VIM*QEVHEHALSSGSIAAI.T          | 2 | 3.33 | 0.30 | -4.87 |
| IPI00295098 | Signal recognition particle receptor subunit beta              | K.NTPSFLIACNKQDIAM*AK.S           | 3 | 2.31 | 0.07 | -5.86 |
| IPI00295172 | Ninjurin-1                                                     | K.YDLNPNPK.H                      | 2 | 2.40 | 0.14 |       |
| IPI00295386 | Carbonyl reductase [NADPH] 1                                   | K.ILLNACCPGWVR.T                  | 2 | 3.70 | 0.40 | -2.63 |
| IPI00295386 | Carbonyl reductase [NADPH] 1                                   | K.TNFFGTR.D                       | 2 | 1.82 | 0.07 | -2.34 |
| IPI00295386 | Carbonyl reductase [NADPH] 1                                   | R.FHQLDIDDLQSIR.A                 | 3 | 4.09 | 0.31 | -1.34 |
| IPI00295386 | Carbonyl reductase [NADPH] 1                                   | R.GQAAVQQLQAEGLSPR.F              | 2 | 4.48 | 0.47 | -1.89 |
| IPI00295386 | Carbonyl reductase [NADPH] 1                                   | R.VVNVSSIM*SVR.A                  | 2 | 4.24 | 0.40 | -1.52 |
| IPI00295399 | Cadherin-10 precursor                                          | K.ATDADTGKNAEVEYR.I               | 3 | 3.78 | 0.45 | -0.77 |
| IPI00295399 | Cadherin-10 precursor                                          | K.LHSDQDKGDGSLK.Y                 | 2 | 2.89 | 0.32 | -2.72 |
| IPI00295399 | Cadherin-10 precursor                                          | R.DPDISSPIR.F                     | 2 | 3.30 | 0.31 | -2.31 |
| IPI00295399 | Cadherin-10 precursor                                          | R.TLRPVEPESEFVIK.I                | 3 | 3.00 | 0.18 | -2.31 |
| IPI00295399 | Cadherin-10 precursor                                          | R.TPVPQQR.I                       | 2 | 2.14 | 0.05 | -3.06 |
| IPI00295399 | Cadherin-10 precursor                                          | R.VIYSILQQQPYFVPEPETGIIR.T        | 3 | 5.38 | 0.24 | -2.54 |
| IPI00295414 | Collagen alpha-1(XV) chain precursor                           | R.AAGLLSTYR.A                     | 1 | 1.44 | 0.15 | -3.14 |
| IPI00295414 | Collagen alpha-1(XV) chain precursor                           | R.AAGLLSTYR.A                     | 2 | 2.73 | 0.20 | -1.01 |
| IPI00295414 | Collagen alpha-1(XV) chain precursor                           | R.AFLSSHLQDLSTIVR.K               | 2 | 4.83 | 0.50 | -3.34 |
| IPI00295414 | Collagen alpha-1(XV) chain precursor                           | R.AFLSSHLQDLSTIVR.K               | 3 | 3.43 | 0.27 | -2.53 |
| IPI00295414 | Collagen alpha-1(XV) chain precursor                           | R.GGVLFITDAFQK.V                  | 2 | 3.21 | 0.32 | -3.84 |
| IPI00295414 | Collagen alpha-1(XV) chain precursor                           | R.LVDNYCEAWR.T                    | 2 | 2.09 | 0.12 | -0.60 |
| IPI00295414 | Collagen alpha-1(XV) chain precursor                           | R.TADTAVTGLASPLSTGK.I             | 2 | 4.37 | 0.50 | -2.52 |

|             |                                                        |                                   |   |      |      |       |
|-------------|--------------------------------------------------------|-----------------------------------|---|------|------|-------|
| IPI00295414 | Collagen alpha-1(XV) chain precursor                   | R.TADTAVTGLASPLSTGK.I             | 3 | 3.17 | 0.09 | -1.28 |
| IPI00295414 | Collagen alpha-1(XV) chain precursor                   | R.YSLPIVNLK.G                     | 1 | 2.13 | 0.24 | -3.16 |
| IPI00295414 | Collagen alpha-1(XV) chain precursor                   | R.YSLPIVNLK.G                     | 2 | 1.91 | 0.22 | -0.26 |
| IPI00295469 | Copine-6                                               | K.YSVLLVLTGQVSDMAETR.T            | 2 | 2.53 | 0.16 | -2.35 |
| IPI00295502 | Isoform 1 of Protein Wiz                               | K.ALAKMM*GGAGPGSSLEAR.S           | 2 | 2.48 | 0.10 |       |
| IPI00295503 | Isoform 2 of Probable ATP-dependent RNA helicase DDX58 | K.RAKIFCARQNCSDHWGIHVK.Y          | 3 | 2.31 | 0.07 | -3.50 |
| IPI00295542 | Nucleobindin-1 precursor                               | K.AKM*DAEQDPNVQVDHLNLLK.Q         | 3 | 2.91 | 0.22 | -3.05 |
| IPI00295542 | Nucleobindin-1 precursor                               | K.APAAHPEGQLK.F                   | 1 | 2.46 | 0.30 | -3.83 |
| IPI00295542 | Nucleobindin-1 precursor                               | K.APAAHPEGQLK.F                   | 2 | 3.30 | 0.43 | -2.76 |
| IPI00295542 | Nucleobindin-1 precursor                               | K.EVWEELDGLDPNRFNPK.T             | 3 | 2.22 | 0.14 | -2.77 |
| IPI00295542 | Nucleobindin-1 precursor                               | K.FHPDTPDDVPVPAPAGDQK.E           | 2 | 5.11 | 0.58 | -2.80 |
| IPI00295542 | Nucleobindin-1 precursor                               | K.FHPDTPDDVPVPAPAGDQK.E           | 3 | 3.43 | 0.24 | -1.70 |
| IPI00295542 | Nucleobindin-1 precursor                               | K.FHPDTPDDVPVPAPAGDQK.E.V         | 2 | 4.94 | 0.56 | -2.98 |
| IPI00295542 | Nucleobindin-1 precursor                               | K.FHPDTPDDVPVPAPAGDQKEVDTSEK.K    | 3 | 4.92 | 0.56 | -1.56 |
| IPI00295542 | Nucleobindin-1 precursor                               | K.FHPDTPDDVPVPAPAGDQKEVDTSEKK.L   | 3 | 4.40 | 0.42 | -4.68 |
| IPI00295542 | Nucleobindin-1 precursor                               | K.FHPDTPDDVPVPAPAGDQKEVDTSEKK.L   | 4 | 2.39 | 0.13 | -3.51 |
| IPI00295542 | Nucleobindin-1 precursor                               | K.LLERLPEVEVPQHL.-                | 2 | 3.00 | 0.34 | -2.06 |
| IPI00295542 | Nucleobindin-1 precursor                               | K.LLERLPEVEVPQHL.-                | 3 | 3.41 | 0.19 | -2.12 |
| IPI00295542 | Nucleobindin-1 precursor                               | K.LQAANAEDIKSGK.L                 | 2 | 4.23 | 0.39 | -2.50 |
| IPI00295542 | Nucleobindin-1 precursor                               | K.LQAANAEDIKSGK.L                 | 3 | 2.16 | 0.25 | -2.69 |
| IPI00295542 | Nucleobindin-1 precursor                               | K.M*DAEQDPNVQVDHLNLLK.Q           | 3 | 4.04 | 0.32 | -1.32 |
| IPI00295542 | Nucleobindin-1 precursor                               | K.NVDTPNQRDLVTLLEEFLLASTQR.K      | 3 | 2.79 | 0.23 | -1.52 |
| IPI00295542 | Nucleobindin-1 precursor                               | K.QFEHLDPQNHQTFEAR.D              | 3 | 2.20 | 0.20 | -3.19 |
| IPI00295542 | Nucleobindin-1 precursor                               | K.TFFILHDINSDGVLDEQELEALFTK.E     | 3 | 5.85 | 0.50 | -4.25 |
| IPI00295542 | Nucleobindin-1 precursor                               | K.TFFILHDINSDGVLDEQELEALFTKELEK.V | 3 | 4.07 | 0.38 | -3.54 |
| IPI00295542 | Nucleobindin-1 precursor                               | K.TFFILHDINSDGVLDEQELEALFTKELEK.V | 4 | 3.45 | 0.09 | -1.45 |
| IPI00295542 | Nucleobindin-1 precursor                               | K.VNVPGSQAQLK.E                   | 2 | 2.73 | 0.33 | -1.84 |
| IPI00295542 | Nucleobindin-1 precursor                               | K.VYDPKNEEDDM*REM*EEERLR.M        | 4 | 2.38 | 0.21 | -2.66 |
| IPI00295542 | Nucleobindin-1 precursor                               | R.DLAQYDAAHHEEFKR.Y               | 3 | 2.64 | 0.40 | -2.81 |
| IPI00295542 | Nucleobindin-1 precursor                               | R.DLELLIQTATR.D                   | 2 | 3.86 | 0.36 | -3.85 |
| IPI00295542 | Nucleobindin-1 precursor                               | R.EKLQAANAEDIKSGK.L               | 2 | 4.16 | 0.43 | -1.97 |
| IPI00295542 | Nucleobindin-1 precursor                               | R.EKLQAANAEDIKSGK.L               | 3 | 2.26 | 0.20 |       |
| IPI00295542 | Nucleobindin-1 precursor                               | R.ELDFVSHHVR.T                    | 2 | 2.96 | 0.33 | -3.39 |
| IPI00295542 | Nucleobindin-1 precursor                               | R.ELQQAVLHM*EQR.K                 | 2 | 2.99 | 0.21 |       |
| IPI00295542 | Nucleobindin-1 precursor                               | R.ELQQAVLHM*EQR.K                 | 3 | 1.89 | 0.13 | -1.72 |
| IPI00295542 | Nucleobindin-1 precursor                               | R.LPEVEVPQHL.-                    | 2 | 2.94 | 0.26 | -2.44 |
| IPI00295542 | Nucleobindin-1 precursor                               | R.LSQETEALGR.S                    | 1 | 1.89 | 0.29 | -3.13 |
| IPI00295542 | Nucleobindin-1 precursor                               | R.LSQETEALGR.S                    | 2 | 4.09 | 0.32 | -2.49 |
| IPI00295542 | Nucleobindin-1 precursor                               | R.LVTLEEFLLASTQR.K                | 2 | 3.71 | 0.32 | -4.76 |
| IPI00295542 | Nucleobindin-1 precursor                               | R.LVTLEEFLLASTQR.K                | 3 | 3.61 | 0.34 | -2.86 |
| IPI00295542 | Nucleobindin-1 precursor                               | R.RYLESLGEEQRK.E                  | 3 | 4.16 | 0.16 |       |

|             |                                                                       |                              |   |      |      |       |
|-------------|-----------------------------------------------------------------------|------------------------------|---|------|------|-------|
| IPI00295542 | Nucleobindin-1 precursor                                              | R.TKLDELKR.Q                 | 2 | 1.96 | 0.06 | -3.04 |
| IPI00295542 | Nucleobindin-1 precursor                                              | R.YLESLGEEQR.K               | 2 | 2.88 | 0.18 | -3.36 |
| IPI00295542 | Nucleobindin-1 precursor                                              | R.YLESLGEEQRK.E              | 2 | 2.72 | 0.21 | -4.53 |
| IPI00295542 | Nucleobindin-1 precursor                                              | R.YLQEVLDVLETDGHFR.E         | 2 | 4.78 | 0.38 | -3.56 |
| IPI00295542 | Nucleobindin-1 precursor                                              | R.YLQEVLDVLETDGHFR.E         | 3 | 3.70 | 0.35 | -4.50 |
| IPI00295577 | Receptor-type tyrosine-protein phosphatase beta precursor             | R.DPVYSR.H                   | 1 | 1.17 | 0.09 | -2.62 |
| IPI00295618 | Isoform Long of Platelet endothelial cell adhesion molecule precursor | R.DQNFVILEFPVEEQDR.V         | 2 | 4.50 | 0.46 | -3.23 |
| IPI00295741 | Cathepsin B precursor                                                 | A.FGAVEAISDR.I               | 2 | 3.84 | 0.36 | -1.22 |
| IPI00295741 | Cathepsin B precursor                                                 | K.DIM*AEIYK.N                | 2 | 3.18 | 0.18 | -2.23 |
| IPI00295741 | Cathepsin B precursor                                                 | K.EIRDQGSCGSCWAFGAVEAISDR.I  | 3 | 4.53 | 0.34 | -1.75 |
| IPI00295741 | Cathepsin B precursor                                                 | K.HYGYSYSVSNSEKDIM*AEIYK.N   | 3 | 3.80 | 0.55 | -1.92 |
| IPI00295741 | Cathepsin B precursor                                                 | K.HYGYSYSVSNSEKDIM*AEIYK.N   | 4 | 3.59 | 0.33 | -0.92 |
| IPI00295741 | Cathepsin B precursor                                                 | K.ICEPGYSPTYK.Q              | 2 | 2.97 | 0.28 | -2.63 |
| IPI00295741 | Cathepsin B precursor                                                 | K.LPASFDAR.E                 | 2 | 2.27 | 0.14 | -3.07 |
| IPI00295741 | Cathepsin B precursor                                                 | K.NGPVEGAFSVYSDFLLYK.S       | 2 | 5.80 | 0.59 | -8.14 |
| IPI00295741 | Cathepsin B precursor                                                 | K.NGPVEGAFSVYSDFLLYK.S       | 3 | 4.59 | 0.45 | -2.88 |
| IPI00295741 | Cathepsin B precursor                                                 | K.QDKHYGYSYSVSNSEK.D         | 3 | 2.33 | 0.31 | -3.49 |
| IPI00295741 | Cathepsin B precursor                                                 | K.SGVYQHVTGEM*M*GGHAIR.I     | 3 | 3.42 | 0.37 |       |
| IPI00295741 | Cathepsin B precursor                                                 | R.DQGSCGSCWAFGAVEAISDR.I     | 2 | 5.56 | 0.58 | -4.20 |
| IPI00295741 | Cathepsin B precursor                                                 | R.DQGSCGSCWAFGAVEAISDR.I     | 3 | 5.10 | 0.48 | -4.77 |
| IPI00295741 | Cathepsin B precursor                                                 | R.EQWPQCPTIK.E               | 2 | 2.58 | 0.21 | -3.15 |
| IPI00295741 | Cathepsin B precursor                                                 | R.PSFHPLSDELVNYVNR.N         | 3 | 4.66 | 0.42 | -1.84 |
| IPI00295741 | Cathepsin B precursor                                                 | R.SRPSFHPLSDELVNYVNR.R       | 3 | 4.37 | 0.35 | -3.97 |
| IPI00295741 | Cathepsin B precursor                                                 | R.TDQYWEKI.-                 | 2 | 2.68 | 0.29 | -2.91 |
| IPI00295741 | Cathepsin B precursor                                                 | R.VM*FTEDLKLPAFDAR.E         | 2 | 2.74 | 0.37 | -2.61 |
| IPI00295741 | Cathepsin B precursor                                                 | R.VM*FTEDLKLPAFDAR.E         | 3 | 4.05 | 0.31 | -2.61 |
| IPI00295741 | Cathepsin B precursor                                                 | W.AFGAVEAISDR.I              | 2 | 3.90 | 0.38 | -2.86 |
| IPI00295767 | Noelin-2 precursor                                                    | K.LTGVSNPITVR.A              | 2 | 3.41 | 0.31 | -2.10 |
| IPI00295767 | Noelin-2 precursor                                                    | R.LDPHTLEV* <sup>2</sup> R.S | 2 | 2.03 | 0.25 | -0.96 |
| IPI00295832 | Oligodendrocyte-myelin glycoprotein precursor                         | C.ICPLQCICTER.H              | 2 | 3.75 | 0.31 | -2.71 |
| IPI00295832 | Oligodendrocyte-myelin glycoprotein precursor                         | I.SNNRLESPLAHLPR.S           | 2 | 3.43 | 0.22 | -3.52 |
| IPI00295832 | Oligodendrocyte-myelin glycoprotein precursor                         | K.DTTFTSTDK.A                | 2 | 1.92 | 0.14 | -2.54 |
| IPI00295832 | Oligodendrocyte-myelin glycoprotein precursor                         | K.ETTFGATLSK.D               | 2 | 2.24 | 0.27 | -4.00 |
| IPI00295832 | Oligodendrocyte-myelin glycoprotein precursor                         | K.FTFIPDQSFDQLFQLQEIT.L      | 2 | 3.61 | 0.45 | -4.33 |
| IPI00295832 | Oligodendrocyte-myelin glycoprotein precursor                         | K.FTFIPDQSFDQLFQLQEITLYNNR.W | 2 | 4.70 | 0.48 | -4.92 |
| IPI00295832 | Oligodendrocyte-myelin glycoprotein precursor                         | K.FTFIPDQSFDQLFQLQEITLYNNR.W | 3 | 6.36 | 0.42 | -5.30 |
| IPI00295832 | Oligodendrocyte-myelin glycoprotein precursor                         | K.FTFIPDQSFDQLFQLQEITLYNNR.W | 4 | 2.76 | 0.19 | -3.19 |
| IPI00295832 | Oligodendrocyte-myelin glycoprotein precursor                         | K.SDTAYQWNLK.Y               | 2 | 2.66 | 0.24 | -1.92 |
| IPI00295832 | Oligodendrocyte-myelin glycoprotein precursor                         | K.YLDVSK.N                   | 1 | 2.10 | 0.06 | -3.44 |
| IPI00295832 | Oligodendrocyte-myelin glycoprotein precursor                         | R.LESPLAHLPR.S               | 2 | 3.35 | 0.27 | -2.91 |

|             |                                                                      |                               |   |      |      |       |
|-------------|----------------------------------------------------------------------|-------------------------------|---|------|------|-------|
| IPI00295832 | Oligodendrocyte-myelin glycoprotein precursor                        | R.SLEVLNLSSNK.L               | 1 | 2.99 | 0.31 | -2.53 |
| IPI00295832 | Oligodendrocyte-myelin glycoprotein precursor                        | R.SLEVLNLSSNK.L               | 2 | 4.23 | 0.44 | -2.75 |
| IPI00295832 | Oligodendrocyte-myelin glycoprotein precursor                        | R.SLEVLNLSSNKLWVPTNM*PSK.L    | 3 | 2.64 | 0.07 | -2.92 |
| IPI00295832 | Oligodendrocyte-myelin glycoprotein precursor                        | R.TKETTFGATLSK.D              | 2 | 3.86 | 0.44 | -2.58 |
| IPI00295832 | Oligodendrocyte-myelin glycoprotein precursor                        | R.TKETTFGATLSK.D              | 3 | 3.54 | 0.24 | -3.81 |
| IPI00295832 | Oligodendrocyte-myelin glycoprotein precursor                        | R.TLDISNNR.L                  | 1 | 2.02 | 0.12 | -2.93 |
| IPI00295832 | Oligodendrocyte-myelin glycoprotein precursor                        | R.TLDISNNR.L                  | 2 | 2.36 | 0.07 | -1.42 |
| IPI00295832 | Oligodendrocyte-myelin glycoprotein precursor                        | R.TLDISNNRLESPLAHLPR.S        | 2 | 3.09 | 0.28 | -5.10 |
| IPI00295832 | Oligodendrocyte-myelin glycoprotein precursor                        | R.TLDISNNRLESPLAHLPR.S        | 3 | 5.00 | 0.44 | -4.01 |
| IPI00295832 | Oligodendrocyte-myelin glycoprotein precursor                        | R.TLDISNNRLESPLAHLPR.S        | 4 | 1.79 | 0.21 | -1.73 |
| IPI00296058 | EGF-containing fibulin-like extracellular matrix protein 2 precursor | K.IGPECVDIDECR.Y              | 2 | 3.62 | 0.47 |       |
| IPI00296058 | EGF-containing fibulin-like extracellular matrix protein 2 precursor | R.DGFSCSDIDECSYSSYLQYR.C      | 2 | 4.06 | 0.27 |       |
| IPI00296058 | EGF-containing fibulin-like extracellular matrix protein 2 precursor | R.SCVDVNECDM*GAPCEQR.C        | 2 | 5.39 | 0.40 |       |
| IPI00296058 | EGF-containing fibulin-like extracellular matrix protein 2 precursor | R.SCVDVNECDM*GAPCEQR.C        | 3 | 3.23 | 0.24 |       |
| IPI00296058 | EGF-containing fibulin-like extracellular matrix protein 2 precursor | R.SVPADVFIQATSVPYGPAYNAFQIR.A | 2 | 4.07 | 0.35 |       |
| IPI00296099 | Thrombospondin-1 precursor                                           | K.GGVNDNFQGVLQNV.R.F          | 2 | 4.44 | 0.41 | -3.30 |
| IPI00296099 | Thrombospondin-1 precursor                                           | R.AQGYSGLSVK.V                | 2 | 1.72 | 0.19 | 0.61  |
| IPI00296099 | Thrombospondin-1 precursor                                           | R.DNCQYVYNVDQR.D              | 2 | 3.53 | 0.32 | -3.93 |
| IPI00296099 | Thrombospondin-1 precursor                                           | R.FVFGTTPEDILR.N              | 2 | 2.67 | 0.33 | -3.61 |
| IPI00296099 | Thrombospondin-1 precursor                                           | R.GTLALER.K                   | 2 | 2.88 | 0.17 | -3.97 |
| IPI00296099 | Thrombospondin-1 precursor                                           | R.IEDANLIPPVPDDKFQDLVDAVR.A   | 3 | 2.55 | 0.19 | -0.95 |
| IPI00296099 | Thrombospondin-1 precursor                                           | R.TIVTTLQDSIR.K               | 2 | 3.55 | 0.42 | -2.21 |
| IPI00296141 | Dipeptidyl-peptidase 2 precursor                                     | K.DLFLQGAYDTVR.W              | 2 | 4.07 | 0.33 | -3.65 |
| IPI00296141 | Dipeptidyl-peptidase 2 precursor                                     | K.DLTQLFM*FAR.N               | 2 | 2.94 | 0.32 | -4.15 |
| IPI00296141 | Dipeptidyl-peptidase 2 precursor                                     | K.SLPFGAQSTQR.G               | 2 | 3.24 | 0.24 | -1.59 |
| IPI00296141 | Dipeptidyl-peptidase 2 precursor                                     | R.AASNIIFSNGLDPWAGGGIR.R      | 2 | 6.08 | 0.45 | -4.08 |
| IPI00296141 | Dipeptidyl-peptidase 2 precursor                                     | R.AASNIIFSNGLDPWAGGGIR.R      | 3 | 5.29 | 0.29 | -3.60 |
| IPI00296141 | Dipeptidyl-peptidase 2 precursor                                     | R.APDPGFQER.F                 | 2 | 2.63 | 0.25 | -2.23 |
| IPI00296141 | Dipeptidyl-peptidase 2 precursor                                     | R.ASHPEDPASVVEAR.K            | 2 | 2.83 | 0.34 | -2.32 |
| IPI00296141 | Dipeptidyl-peptidase 2 precursor                                     | R.DVTADFEGQSPK.C              | 1 | 2.28 | 0.17 | -1.68 |
| IPI00296141 | Dipeptidyl-peptidase 2 precursor                                     | R.DVTADFEGQSPK.C              | 2 | 4.10 | 0.40 | -2.90 |
| IPI00296141 | Dipeptidyl-peptidase 2 precursor                                     | R.GALLVFAEHR.Y                | 2 | 3.41 | 0.32 | -3.09 |
| IPI00296141 | Dipeptidyl-peptidase 2 precursor                                     | R.GHTELLTVEQALADFAELLR.A      | 2 | 5.77 | 0.59 | -4.22 |
| IPI00296141 | Dipeptidyl-peptidase 2 precursor                                     | R.GHTELLTVEQALADFAELLR.A      | 3 | 3.87 | 0.39 | -6.03 |
| IPI00296141 | Dipeptidyl-peptidase 2 precursor                                     | R.GHTELLTVEQALADFAELLR.A      | 4 | 5.07 | 0.24 | -3.38 |
| IPI00296141 | Dipeptidyl-peptidase 2 precursor                                     | R.KLEATIIGEWVK.A              | 2 | 3.82 | 0.27 | -3.95 |
| IPI00296141 | Dipeptidyl-peptidase 2 precursor                                     | R.LDHFNER.F                   | 1 | 1.76 | 0.22 | -3.98 |

|             |                                       |                                    |   |      |      |       |
|-------------|---------------------------------------|------------------------------------|---|------|------|-------|
| IPI00296141 | Dipeptidyl-peptidase 2 precursor      | R.LDHFNER.F                        | 2 | 2.15 | 0.07 | -2.45 |
| IPI00296141 | Dipeptidyl-peptidase 2 precursor      | R.NAFTVLAM*M*DYPYPTDFLGPLPANPVK.V  | 2 | 4.31 | 0.46 | -4.11 |
| IPI00296141 | Dipeptidyl-peptidase 2 precursor      | R.NAFTVLAM*M*DYPYPTDFLGPLPANPVK.V  | 3 | 5.86 | 0.58 | -4.55 |
| IPI00296141 | Dipeptidyl-peptidase 2 precursor      | R.NAFTVLAM*M*DYPYPTDFLGPLPANPVK.V  | 4 | 4.82 | 0.42 | -3.82 |
| IPI00296141 | Dipeptidyl-peptidase 2 precursor      | R.QIKDLFLQGAYDTR.W                 | 2 | 3.96 | 0.42 | -2.77 |
| IPI00296141 | Dipeptidyl-peptidase 2 precursor      | R.WEFGTCQPLSDEKDLTQLFM*FAR.N       | 2 | 4.38 | 0.49 | -3.22 |
| IPI00296141 | Dipeptidyl-peptidase 2 precursor      | R.WEFGTCQPLSDEKDLTQLFM*FAR.N       | 3 | 4.79 | 0.51 | -3.59 |
| IPI00296165 | Complement C1r subcomponent precursor | K.EFM*SQGNK.M                      | 1 | 1.82 | 0.22 | -4.86 |
| IPI00296165 | Complement C1r subcomponent precursor | K.FLEPFDIDDHQQVHCPYDQLQIYANGK.N    | 3 | 5.43 | 0.36 |       |
| IPI00296165 | Complement C1r subcomponent precursor | K.GFLAYYQAVDLDECASR.S              | 2 | 6.23 | 0.50 |       |
| IPI00296165 | Complement C1r subcomponent precursor | K.LFGEVTSPLFPKYPNNFETTTVITVPTGYR.V | 3 | 3.97 | 0.41 | -3.97 |
| IPI00296165 | Complement C1r subcomponent precursor | K.LVFQQFDLEPSEGCYDYVK.I            | 2 | 2.69 | 0.31 | -6.30 |
| IPI00296165 | Complement C1r subcomponent precursor | K.M*GNFPWQVFTNIHGR.G               | 2 | 2.58 | 0.18 |       |
| IPI00296165 | Complement C1r subcomponent precursor | K.M*GNFPWQVFTNIHGR.G               | 3 | 4.01 | 0.31 |       |
| IPI00296165 | Complement C1r subcomponent precursor | K.NRM*DVFSQNM*FCAGHPSLK.Q          | 3 | 3.66 | 0.35 |       |
| IPI00296165 | Complement C1r subcomponent precursor | K.QDACQGDSSGGVFAVR.D               | 2 | 4.44 | 0.46 | -4.75 |
| IPI00296165 | Complement C1r subcomponent precursor | K.QDACQGDSSGGVFAVRDPNTDR.W         | 3 | 2.85 | 0.20 | -2.22 |
| IPI00296165 | Complement C1r subcomponent precursor | K.QRPPDLTSSNAVDLLFFTDESGBSR.G      | 2 | 2.49 | 0.46 | -2.90 |
| IPI00296165 | Complement C1r subcomponent precursor | K.QRPPDLTSSNAVDLLFFTDESGBSR.G      | 3 | 4.75 | 0.45 | -4.92 |
| IPI00296165 | Complement C1r subcomponent precursor | K.TLDEFTIQLNLPQYQFR.D              | 2 | 5.00 | 0.50 | -5.07 |
| IPI00296165 | Complement C1r subcomponent precursor | K.TLDEFTIQLNLPQYQFR.D              | 3 | 4.95 | 0.42 | -4.87 |
| IPI00296165 | Complement C1r subcomponent precursor | K.VLNYVDWIK.K                      | 2 | 3.29 | 0.35 | -1.82 |
| IPI00296165 | Complement C1r subcomponent precursor | K.VLNYVDWIKK.E                     | 2 | 3.33 | 0.25 | -3.18 |
| IPI00296165 | Complement C1r subcomponent precursor | K.VLNYVDWIKK.E                     | 3 | 2.23 | 0.21 |       |
| IPI00296165 | Complement C1r subcomponent precursor | R.CLPVCGKPVNPVEQR.Q                | 2 | 4.03 | 0.42 |       |
| IPI00296165 | Complement C1r subcomponent precursor | R.DYFIATCK.Q                       | 2 | 2.96 | 0.35 | -1.52 |
| IPI00296165 | Complement C1r subcomponent precursor | R.ESEQVYTTCTAQGIWK.N               | 2 | 4.48 | 0.41 | -2.75 |
| IPI00296165 | Complement C1r subcomponent precursor | R.ESEQVYTTCTAQGIWK.N               | 3 | 3.31 | 0.31 |       |
| IPI00296165 | Complement C1r subcomponent precursor | R.FVRLPVANPQACENWLR.G              | 3 | 5.29 | 0.30 |       |
| IPI00296165 | Complement C1r subcomponent precursor | R.GGGALLGDR.W                      | 1 | 2.35 | 0.20 | -2.80 |
| IPI00296165 | Complement C1r subcomponent precursor | R.GGGALLGDR.W                      | 2 | 3.11 | 0.23 | -4.75 |
| IPI00296165 | Complement C1r subcomponent precursor | R.GGGALLGDRWILTAHTLYPK.E           | 4 | 3.36 | 0.30 | -1.08 |
| IPI00296165 | Complement C1r subcomponent precursor | R.GYGFYTK.V                        | 1 | 1.62 | 0.26 | -0.61 |
| IPI00296165 | Complement C1r subcomponent precursor | R.IQYYCHEPYK.M                     | 2 | 2.66 | 0.30 |       |
| IPI00296165 | Complement C1r subcomponent precursor | R.LPVANPQACENWLR.G                 | 2 | 4.80 | 0.53 | -3.70 |
| IPI00296165 | Complement C1r subcomponent precursor | R.M*DVFSQNM*FCAGHPSLK.Q            | 3 | 2.67 | 0.24 |       |
| IPI00296165 | Complement C1r subcomponent precursor | R.VKLVFQQFDLEPSEGCYDYVK.I          | 2 | 4.67 | 0.24 |       |
| IPI00296165 | Complement C1r subcomponent precursor | R.VKLVFQQFDLEPSEGCYDYVK.I          | 3 | 3.81 | 0.28 | -2.37 |
| IPI00296165 | Complement C1r subcomponent precursor | R.VSVHPDYR.Q                       | 1 | 2.00 | 0.17 | -2.54 |
| IPI00296165 | Complement C1r subcomponent precursor | R.VSVHPDYR.Q                       | 2 | 2.46 | 0.18 | -1.87 |
| IPI00296165 | Complement C1r subcomponent precursor | R.YTTEIK.C                         | 2 | 2.53 | 0.22 | -2.60 |
| IPI00296165 | Complement C1r subcomponent precursor | R.YTTM*GVNTYK.A                    | 2 | 3.28 | 0.29 |       |



|             |                                                             |                                          |   |      |      |       |
|-------------|-------------------------------------------------------------|------------------------------------------|---|------|------|-------|
| IPI00296176 | Coagulation factor IX precursor                             | K.FTIYNNM*FCAGFHGGGR.D                   | 3 | 2.67 | 0.26 | -2.57 |
| IPI00296176 | Coagulation factor IX precursor                             | K.ITVVAGEHNIETEHETEQKR.N                 | 3 | 3.82 | 0.41 | -2.59 |
| IPI00296176 | Coagulation factor IX precursor                             | K.NCELDVTCNIK.N                          | 2 | 3.41 | 0.28 | -3.68 |
| IPI00296176 | Coagulation factor IX precursor                             | K.VDAFCGGSIVNEK.W                        | 2 | 4.19 | 0.39 | -5.22 |
| IPI00296176 | Coagulation factor IX precursor                             | K.WIVTAAHCVETGVK.I                       | 2 | 3.45 | 0.31 | -2.97 |
| IPI00296176 | Coagulation factor IX precursor                             | K.YGIYTK.V                               | 1 | 1.81 | 0.17 | -1.55 |
| IPI00296176 | Coagulation factor IX precursor                             | K.YNHDIALLELDEPLVLNSYVTPICIADKEYTNIFLK.F | 4 | 3.65 | 0.22 | -3.56 |
| IPI00296176 | Coagulation factor IX precursor                             | R.SALVLQYLR.V                            | 2 | 3.25 | 0.23 | -2.49 |
| IPI00296176 | Coagulation factor IX precursor                             | R.SALVLQYLRVPLVDR.A                      | 3 | 3.19 | 0.32 | -1.84 |
| IPI00296176 | Coagulation factor IX precursor                             | R.VVGGEDAKPGQFPWQVVLNGK.V                | 3 | 4.03 | 0.41 | -3.99 |
| IPI00296197 | Nucleotide exchange factor SIL1 precursor                   | K.LGGLQVLR.T                             | 2 | 3.03 | 0.08 | -2.14 |
| IPI00296197 | Nucleotide exchange factor SIL1 precursor                   | K.LLVILATEQPLTAK.K                       | 2 | 3.14 | 0.39 | -3.78 |
| IPI00296197 | Nucleotide exchange factor SIL1 precursor                   | K.VQVEAIEGGALQK.L                        | 2 | 4.41 | 0.41 | -2.65 |
| IPI00296197 | Nucleotide exchange factor SIL1 precursor                   | L.DINTNTYTSQDLK.S                        | 2 | 3.67 | 0.39 | -3.70 |
| IPI00296197 | Nucleotide exchange factor SIL1 precursor                   | R.VVTLLYDLVTEK.M                         | 2 | 2.54 | 0.43 | -2.75 |
| IPI00296219 | Glutaminase liver isoform, mitochondrial precursor          | K.ENLESMV.-                              | 1 | 1.90 | 0.07 | -3.67 |
| IPI00296259 | Transmembrane emp24 domain-containing protein 4 precursor   | G.LYFHIGETEKR.C                          | 2 | 3.02 | 0.28 | -4.30 |
| IPI00296337 | Isoform 1 of DNA-dependent protein kinase catalytic subunit | R.QFINLMLPM*K.E                          | 2 | 2.93 | 0.07 |       |
| IPI00296374 | Zinc finger protein-like 1                                  | R.AAADSDPNLDPLM*NPHIR.V                  | 2 | 3.33 | 0.41 | -1.94 |
| IPI00296374 | Zinc finger protein-like 1                                  | R.AAADSDPNLDPLM*NPHIR.V                  | 3 | 2.30 | 0.26 | -1.72 |
| IPI00296441 | Adenosine deaminase                                         | R.LGHGYHTLEDQALYNR.L                     | 3 | 3.72 | 0.25 | -3.97 |
| IPI00296441 | Adenosine deaminase                                         | R.TVHAGEVGSAEVVKEAVDILKTER.L             | 5 | 2.34 | 0.13 | -0.22 |
| IPI00296461 | Isoform 1 of Sphingomyelin phosphodiesterase precursor      | R.IGGFYALSPYPGLR.L                       | 2 | 3.29 | 0.31 | -4.53 |
| IPI00296534 | Isoform D of Fibulin-1 precursor                            | A.DVLLLEACCADGHR.M                       | 2 | 3.03 | 0.48 | -2.30 |
| IPI00296534 | Isoform D of Fibulin-1 precursor                            | K.DCSLPYATESK.E                          | 1 | 2.15 | 0.06 |       |
| IPI00296534 | Isoform D of Fibulin-1 precursor                            | K.DCSLPYATESK.E                          | 2 | 2.86 | 0.21 | -3.65 |
| IPI00296534 | Isoform D of Fibulin-1 precursor                            | K.DCSLPYATESKECR.M                       | 2 | 3.72 | 0.37 |       |
| IPI00296534 | Isoform D of Fibulin-1 precursor                            | K.DIDECESGIHNCLPDFICQNTLGSFR.C           | 3 | 5.39 | 0.30 |       |
| IPI00296534 | Isoform D of Fibulin-1 precursor                            | K.IIEVEEEQEDPYLNDR.C                     | 2 | 6.01 | 0.38 |       |
| IPI00296534 | Isoform D of Fibulin-1 precursor                            | K.IIEVEEEQEDPYLNDR.C                     | 3 | 2.83 | 0.19 |       |
| IPI00296534 | Isoform D of Fibulin-1 precursor                            | K.RCCHCCLLGRAAQAQQQSCEYSLMVGYQCGQVFR.A   | 3 | 3.61 | 0.15 |       |
| IPI00296534 | Isoform D of Fibulin-1 precursor                            | K.SCRPNDVTCVFDVPVHTISHTVISLPTFR.E        | 3 | 5.80 | 0.45 |       |
| IPI00296534 | Isoform D of Fibulin-1 precursor                            | K.SQETGDLDVGGGLQETDK.I                   | 2 | 5.28 | 0.51 | -3.36 |
| IPI00296534 | Isoform D of Fibulin-1 precursor                            | K.SQETGDLDVGGGLQETDKIIEVEEEQEDPYLNDR.C   | 3 | 6.07 | 0.52 | -2.24 |
| IPI00296534 | Isoform D of Fibulin-1 precursor                            | K.TGYFDFGISR.M                           | 1 | 2.29 | 0.26 | -3.34 |
| IPI00296534 | Isoform D of Fibulin-1 precursor                            | K.TGYFDFGISR.M                           | 2 | 3.41 | 0.35 | -3.13 |
| IPI00296534 | Isoform D of Fibulin-1 precursor                            | R.AAQAQQQSCEYSLM*VGYQCGQVFR.A            | 2 | 5.48 | 0.44 |       |
| IPI00296534 | Isoform D of Fibulin-1 precursor                            | R.AAQAQQQSCEYSLM*VGYQCGQVFR.A            | 3 | 5.89 | 0.39 |       |
| IPI00296534 | Isoform D of Fibulin-1 precursor                            | R.AAQAQQQSCEYSLMVGYQCGQVFR.A             | 2 | 5.48 | 0.44 |       |

|             |                                  |                                         |   |      |      |       |
|-------------|----------------------------------|-----------------------------------------|---|------|------|-------|
| IPI00296534 | Isoform D of Fibulin-1 precursor | R.AAQAGQGSCEYSLMVGQCGQVFR.A             | 3 | 5.87 | 0.37 |       |
| IPI00296534 | Isoform D of Fibulin-1 precursor | R.AITPPHPASQANIIFDITEGNLR.D             | 2 | 5.11 | 0.45 |       |
| IPI00296534 | Isoform D of Fibulin-1 precursor | R.AITPPHPASQANIIFDITEGNLR.D             | 3 | 3.46 | 0.16 | -5.11 |
| IPI00296534 | Isoform D of Fibulin-1 precursor | R.CATPHGDNASLEATFVKR.C                  | 3 | 3.87 | 0.29 |       |
| IPI00296534 | Isoform D of Fibulin-1 precursor | R.CLAFECPENYR.R                         | 2 | 2.79 | 0.23 | -2.83 |
| IPI00296534 | Isoform D of Fibulin-1 precursor | R.CLAFECPENYRR.S                        | 2 | 2.32 | 0.10 |       |
| IPI00296534 | Isoform D of Fibulin-1 precursor | R.CVDVDECAPPAEPCGK.G                    | 2 | 4.39 | 0.32 |       |
| IPI00296534 | Isoform D of Fibulin-1 precursor | R.DSFDIIKR.Y                            | 2 | 1.85 | 0.09 | -0.73 |
| IPI00296534 | Isoform D of Fibulin-1 precursor | R.DSSCGTGYELTEDNSCK.D                   | 2 | 4.61 | 0.47 |       |
| IPI00296534 | Isoform D of Fibulin-1 precursor | R.EFTRPEEIIIFLR.A                       | 2 | 3.37 | 0.15 |       |
| IPI00296534 | Isoform D of Fibulin-1 precursor | R.GYHLNEEGTR.C                          | 1 | 3.38 | 0.28 | -1.40 |
| IPI00296534 | Isoform D of Fibulin-1 precursor | R.GYHLNEEGTR.C                          | 2 | 2.95 | 0.34 | -2.36 |
| IPI00296534 | Isoform D of Fibulin-1 precursor | R.GYHLNEEGTRCVDVDECAPPAEPCGK.G          | 2 | 4.55 | 0.36 |       |
| IPI00296534 | Isoform D of Fibulin-1 precursor | R.GYHLNEEGTRCVDVDECAPPAEPCGK.G          | 3 | 6.29 | 0.38 |       |
| IPI00296534 | Isoform D of Fibulin-1 precursor | R.GYQLSDVDGVTCEIDICALPTGGHICSYR.C       | 2 | 4.38 | 0.40 |       |
| IPI00296534 | Isoform D of Fibulin-1 precursor | R.GYQLSDVDGVTCEIDICALPTGGHICSYR.C       | 3 | 6.52 | 0.46 |       |
| IPI00296534 | Isoform D of Fibulin-1 precursor | R.M*CVDVNECQR.Y                         | 2 | 3.56 | 0.47 | -2.81 |
| IPI00296534 | Isoform D of Fibulin-1 precursor | R.M*VQEQCCHSQLEELHCATGISLANEQDR.C       | 3 | 6.38 | 0.45 |       |
| IPI00296534 | Isoform D of Fibulin-1 precursor | R.M*VQEQCCHSQLEELHCATGISLANEQDR.C       | 4 | 3.36 | 0.16 | -3.38 |
| IPI00296534 | Isoform D of Fibulin-1 precursor | R.MVQEQCCHSQLEELHCATGISLANEQDR.C        | 2 | 4.88 | 0.39 |       |
| IPI00296534 | Isoform D of Fibulin-1 precursor | R.MVQEQCCHSQLEELHCATGISLANEQDR.C        | 3 | 7.00 | 0.32 |       |
| IPI00296534 | Isoform D of Fibulin-1 precursor | R.RGYQLSDVDGVTCEIDICALPTGGHICSYR.C      | 2 | 4.38 | 0.31 |       |
| IPI00296534 | Isoform D of Fibulin-1 precursor | R.RGYQLSDVDGVTCEIDICALPTGGHICSYR.C      | 3 | 6.75 | 0.43 |       |
| IPI00296534 | Isoform D of Fibulin-1 precursor | R.SAATLQKEKTDTVR.C                      | 2 | 4.41 | 0.31 |       |
| IPI00296534 | Isoform D of Fibulin-1 precursor | R.SAATLQKEKTDTVR.C                      | 3 | 2.62 | 0.26 |       |
| IPI00296534 | Isoform D of Fibulin-1 precursor | R.YM*DGM*TVGVVR.Q                       | 2 | 2.32 | 0.32 | -3.44 |
| IPI00296534 | Isoform D of Fibulin-1 precursor | R.YMDGM*TVGVVR.Q                        | 2 | 2.89 | 0.27 |       |
| IPI00296537 | Isoform C of Fibulin-1 precursor | A.DVLLLEACCADGHR.M                      | 2 | 3.03 | 0.48 | -2.30 |
| IPI00296537 | Isoform C of Fibulin-1 precursor | K.DCSLPYATESK.E                         | 1 | 2.15 | 0.06 |       |
| IPI00296537 | Isoform C of Fibulin-1 precursor | K.DCSLPYATESK.E                         | 2 | 2.86 | 0.21 | -3.65 |
| IPI00296537 | Isoform C of Fibulin-1 precursor | K.DCSLPYATESKECR.M                      | 2 | 3.72 | 0.37 |       |
| IPI00296537 | Isoform C of Fibulin-1 precursor | K.DIDECESGIHNCLPDFICQNTLGSFR.C          | 3 | 5.39 | 0.30 |       |
| IPI00296537 | Isoform C of Fibulin-1 precursor | K.IIEVEEEQEDPYLNDR.C                    | 2 | 6.01 | 0.38 |       |
| IPI00296537 | Isoform C of Fibulin-1 precursor | K.IIEVEEEQEDPYLNDR.C                    | 3 | 2.83 | 0.19 |       |
| IPI00296537 | Isoform C of Fibulin-1 precursor | K.RCCHCCLLGRAAQAGQGSCEYSLMVGQCGQVFR.A   | 3 | 3.61 | 0.15 |       |
| IPI00296537 | Isoform C of Fibulin-1 precursor | K.SQETGDLVDVGGGLQETDK.I                 | 2 | 5.28 | 0.51 | -3.36 |
| IPI00296537 | Isoform C of Fibulin-1 precursor | K.SQETGDLVDVGGGLQETDKIIEVEEEQEDPYLNDR.C | 3 | 6.07 | 0.52 | -2.24 |
| IPI00296537 | Isoform C of Fibulin-1 precursor | K.TGYFDGISR.M                           | 1 | 2.29 | 0.26 | -3.34 |
| IPI00296537 | Isoform C of Fibulin-1 precursor | K.TGYFDGISR.M                           | 2 | 3.41 | 0.35 | -3.13 |
| IPI00296537 | Isoform C of Fibulin-1 precursor | K.VSPHSGVVVALTKPVPEPR.D                 | 2 | 5.23 | 0.60 | -4.07 |
| IPI00296537 | Isoform C of Fibulin-1 precursor | K.VSPHSGVVVALTKPVPEPR.D                 | 3 | 2.50 | 0.21 | -3.27 |
| IPI00296537 | Isoform C of Fibulin-1 precursor | K.VSPHSGVVVALTKPVPEPR.D                 | 4 | 4.64 | 0.45 | -3.50 |

|             |                                            |                                     |   |      |      |       |
|-------------|--------------------------------------------|-------------------------------------|---|------|------|-------|
| IPI00296537 | Isoform C of Fibulin-1 precursor           | R.AAQAGQGSCEYSLM*VGYQCGQVFR.A       | 2 | 5.48 | 0.44 |       |
| IPI00296537 | Isoform C of Fibulin-1 precursor           | R.AAQAGQGSCEYSLM*VGYQCGQVFR.A       | 3 | 5.89 | 0.39 |       |
| IPI00296537 | Isoform C of Fibulin-1 precursor           | R.AAQAGQGSCEYSLMVGYYQCGQVFR.A       | 2 | 5.48 | 0.44 |       |
| IPI00296537 | Isoform C of Fibulin-1 precursor           | R.AAQAGQGSCEYSLMVGYYQCGQVFR.A       | 3 | 5.87 | 0.37 |       |
| IPI00296537 | Isoform C of Fibulin-1 precursor           | R.CATPHGDNASLEATFVKR.C              | 3 | 3.87 | 0.29 |       |
| IPI00296537 | Isoform C of Fibulin-1 precursor           | R.CLAFECPENYR.R                     | 2 | 2.79 | 0.23 | -2.83 |
| IPI00296537 | Isoform C of Fibulin-1 precursor           | R.CLAFECPENYRR.S                    | 2 | 2.32 | 0.10 |       |
| IPI00296537 | Isoform C of Fibulin-1 precursor           | R.CVDVDECAPPAEPCGK.G                | 2 | 4.39 | 0.32 |       |
| IPI00296537 | Isoform C of Fibulin-1 precursor           | R.DSSCGTGYELTEDNSCK.D               | 2 | 4.61 | 0.47 |       |
| IPI00296537 | Isoform C of Fibulin-1 precursor           | R.ECSKPLR.I                         | 1 | 2.31 | 0.16 |       |
| IPI00296537 | Isoform C of Fibulin-1 precursor           | R.GYHLNEEGTR.C                      | 1 | 3.38 | 0.28 | -1.40 |
| IPI00296537 | Isoform C of Fibulin-1 precursor           | R.GYHLNEEGTR.C                      | 2 | 2.95 | 0.34 | -2.36 |
| IPI00296537 | Isoform C of Fibulin-1 precursor           | R.GYHLNEEGTRCVDVDECAPPAEPCGK.G      | 2 | 4.55 | 0.36 |       |
| IPI00296537 | Isoform C of Fibulin-1 precursor           | R.GYHLNEEGTRCVDVDECAPPAEPCGK.G      | 3 | 6.29 | 0.38 |       |
| IPI00296537 | Isoform C of Fibulin-1 precursor           | R.GYQLSDVDGVTCEDIDECALPTGGHICYSR.C  | 2 | 4.38 | 0.40 |       |
| IPI00296537 | Isoform C of Fibulin-1 precursor           | R.GYQLSDVDGVTCEDIDECALPTGGHICYSR.C  | 3 | 6.52 | 0.46 |       |
| IPI00296537 | Isoform C of Fibulin-1 precursor           | R.HGTVSSFVAK.L                      | 1 | 2.05 | 0.26 |       |
| IPI00296537 | Isoform C of Fibulin-1 precursor           | R.HGTVSSFVAK.L                      | 2 | 2.92 | 0.37 | -3.17 |
| IPI00296537 | Isoform C of Fibulin-1 precursor           | R.ITYYHLSFPTNIQAPAVVFR.M            | 2 | 5.75 | 0.59 | -3.09 |
| IPI00296537 | Isoform C of Fibulin-1 precursor           | R.ITYYHLSFPTNIQAPAVVFR.M            | 3 | 5.75 | 0.40 | -3.84 |
| IPI00296537 | Isoform C of Fibulin-1 precursor           | R.KVSPHSGVVALTKVPEPR.D              | 3 | 2.82 | 0.23 | -4.14 |
| IPI00296537 | Isoform C of Fibulin-1 precursor           | R.LPCHENR.E                         | 2 | 2.42 | 0.14 |       |
| IPI00296537 | Isoform C of Fibulin-1 precursor           | R.M*CVDVNECQR.Y                     | 2 | 3.56 | 0.47 | -2.81 |
| IPI00296537 | Isoform C of Fibulin-1 precursor           | R.M*GPSSAVPGDSM*QLAITGGNEEGFFTR.K   | 2 | 4.94 | 0.47 |       |
| IPI00296537 | Isoform C of Fibulin-1 precursor           | R.M*GPSSAVPGDSM*QLAITGGNEEGFFTR.K   | 3 | 3.80 | 0.35 | -4.59 |
| IPI00296537 | Isoform C of Fibulin-1 precursor           | R.M*GPSSAVPGDSM*QLAITGGNEEGFFTRK.V  | 3 | 2.44 | 0.26 | -2.33 |
| IPI00296537 | Isoform C of Fibulin-1 precursor           | R.M*GPSSAVPGDSMQLAITGGNEEGFFTR.K    | 3 | 3.68 | 0.22 |       |
| IPI00296537 | Isoform C of Fibulin-1 precursor           | R.M*VQEQCCHSQLLEELHCATGISLANEQDR.C  | 3 | 6.38 | 0.45 |       |
| IPI00296537 | Isoform C of Fibulin-1 precursor           | R.M*VQEQCCHSQLLEELHCATGISLANEQDR.C  | 4 | 3.36 | 0.16 | -3.38 |
| IPI00296537 | Isoform C of Fibulin-1 precursor           | R.MVQEQCCHSQLLEELHCATGISLANEQDR.C   | 2 | 4.88 | 0.39 |       |
| IPI00296537 | Isoform C of Fibulin-1 precursor           | R.MVQEQCCHSQLLEELHCATGISLANEQDR.C   | 3 | 7.00 | 0.32 |       |
| IPI00296537 | Isoform C of Fibulin-1 precursor           | R.RGYQLSDVDGVTCEDIDECALPTGGHICYSR.C | 2 | 4.38 | 0.31 |       |
| IPI00296537 | Isoform C of Fibulin-1 precursor           | R.RGYQLSDVDGVTCEDIDECALPTGGHICYSR.C | 3 | 6.75 | 0.43 |       |
| IPI00296558 | Carboxypeptidase-like protein X2 precursor | K.DGDYWR.L                          | 2 | 2.23 | 0.10 | -3.05 |
| IPI00296558 | Carboxypeptidase-like protein X2 precursor | K.ITDFQLHASTVKR.Y                   | 2 | 3.36 | 0.29 | -2.88 |
| IPI00296558 | Carboxypeptidase-like protein X2 precursor | K.TQEHTPTDDHVFR.W                   | 3 | 2.69 | 0.31 | -2.66 |
| IPI00296558 | Carboxypeptidase-like protein X2 precursor | R.FTGVTQGR.N                        | 2 | 2.81 | 0.15 | -0.74 |
| IPI00296558 | Carboxypeptidase-like protein X2 precursor | R.RPQEPRPPK.R                       | 2 | 2.31 | 0.13 | -2.75 |
| IPI00296608 | Complement component C7 precursor          | K.AASGTQNNVLR.G                     | 1 | 2.18 | 0.18 | -1.02 |
| IPI00296608 | Complement component C7 precursor          | K.AASGTQNNVLR.G                     | 2 | 3.74 | 0.31 | -5.59 |
| IPI00296608 | Complement component C7 precursor          | K.AASGTQNNVLRGEPFIR.G               | 2 | 3.19 | 0.21 | -3.56 |
| IPI00296608 | Complement component C7 precursor          | K.AASGTQNNVLRGEPFIR.G               | 3 | 2.53 | 0.44 | -4.66 |

|             |                                   |                                |   |      |      |       |
|-------------|-----------------------------------|--------------------------------|---|------|------|-------|
| IPI00296608 | Complement component C7 precursor | K.DGFVQDEGTM*FPVVK.N           | 2 | 4.36 | 0.52 | -3.33 |
| IPI00296608 | Complement component C7 precursor | K.DGFVQDEGTM*FPVVK.N           | 3 | 2.96 | 0.29 | -1.88 |
| IPI00296608 | Complement component C7 precursor | K.ELSHLPSLYDYSAYR.R            | 2 | 2.54 | 0.21 | -2.06 |
| IPI00296608 | Complement component C7 precursor | K.ELSHLPSLYDYSAYR.R            | 3 | 4.18 | 0.35 | -1.99 |
| IPI00296608 | Complement component C7 precursor | K.ENPLTQAVPK.C                 | 2 | 1.92 | 0.05 | -2.35 |
| IPI00296608 | Complement component C7 precursor | K.EQTM*SECEAGALR.C             | 2 | 3.25 | 0.38 | -5.48 |
| IPI00296608 | Complement component C7 precursor | K.EVPCASVK.K                   | 1 | 1.89 | 0.15 | -1.72 |
| IPI00296608 | Complement component C7 precursor | K.IACVLPVLM*DGIQSHPKPFYTVGEK.V | 3 | 2.98 | 0.30 | -4.45 |
| IPI00296608 | Complement component C7 precursor | K.IACVLPVLM*DGIQSHPKPFYTVGEK.V | 4 | 2.96 | 0.32 | -3.29 |
| IPI00296608 | Complement component C7 precursor | K.LKQDNFNSVEEK.K               | 2 | 4.33 | 0.37 | -3.81 |
| IPI00296608 | Complement component C7 precursor | K.LKQDNFNSVEEK.K               | 3 | 3.30 | 0.27 | -3.30 |
| IPI00296608 | Complement component C7 precursor | K.LKQDNFNSVEEKK.C              | 2 | 4.22 | 0.31 | -3.75 |
| IPI00296608 | Complement component C7 precursor | K.LKQDNFNSVEEKK.C              | 3 | 3.53 | 0.25 | -1.85 |
| IPI00296608 | Complement component C7 precursor | K.LTPLYELVK.E                  | 2 | 1.86 | 0.22 | -1.62 |
| IPI00296608 | Complement component C7 precursor | K.M*PYECGPSLDVCAQDER.S         | 2 | 5.27 | 0.54 | -2.50 |
| IPI00296608 | Complement component C7 precursor | K.M*PYECGPSLDVCAQDER.S         | 3 | 4.34 | 0.32 | -2.69 |
| IPI00296608 | Complement component C7 precursor | K.NVVYTCNEGYSLIGNPVAR.C        | 2 | 5.74 | 0.54 | -4.57 |
| IPI00296608 | Complement component C7 precursor | K.NVVYTCNEGYSLIGNPVAR.C        | 3 | 5.01 | 0.45 | -3.06 |
| IPI00296608 | Complement component C7 precursor | K.QKLTPLYELVK.E                | 3 | 3.04 | 0.18 | -3.88 |
| IPI00296608 | Complement component C7 precursor | K.QDNFNSVEEK.K                 | 2 | 2.11 | 0.29 | -3.39 |
| IPI00296608 | Complement component C7 precursor | K.SSGWHFVVK.F                  | 2 | 2.34 | 0.15 | -2.00 |
| IPI00296608 | Complement component C7 precursor | K.VFSGDGKDFYR.L                | 1 | 2.26 | 0.33 | -2.68 |
| IPI00296608 | Complement component C7 precursor | K.VFSGDGKDFYR.L                | 2 | 3.64 | 0.45 | -2.30 |
| IPI00296608 | Complement component C7 precursor | K.VTVSCSGGM*SLEGPSAFLCGSSLK.W  | 2 | 5.41 | 0.54 | -5.39 |
| IPI00296608 | Complement component C7 precursor | K.VTVSCSGGM*SLEGPSAFLCGSSLK.W  | 3 | 5.95 | 0.46 | -4.87 |
| IPI00296608 | Complement component C7 precursor | R.CFSGQCISK.S                  | 2 | 1.97 | 0.14 | -0.94 |
| IPI00296608 | Complement component C7 precursor | R.DSCTLPASAEK.A                | 1 | 2.30 | 0.36 | -1.46 |
| IPI00296608 | Complement component C7 precursor | R.DSCTLPASAEK.A                | 2 | 3.68 | 0.34 | -3.27 |
| IPI00296608 | Complement component C7 precursor | R.GCPTTEEGCGER.F               | 2 | 3.12 | 0.38 | -2.50 |
| IPI00296608 | Complement component C7 precursor | R.GGGAGFISGLSYLELDNPAGNK.R     | 2 | 6.20 | 0.54 | -6.93 |
| IPI00296608 | Complement component C7 precursor | R.GGGAGFISGLSYLELDNPAGNK.R     | 3 | 5.16 | 0.41 | -3.50 |
| IPI00296608 | Complement component C7 precursor | R.GGGAGFISGLSYLELDNPAGNKR.R    | 2 | 4.54 | 0.48 | -4.97 |
| IPI00296608 | Complement component C7 precursor | R.GGGAGFISGLSYLELDNPAGNKR.R    | 3 | 3.47 | 0.37 | 0.26  |
| IPI00296608 | Complement component C7 precursor | R.GGGAGFISGLSYLELDNPAGNKR.R    | 3 | 3.41 | 0.37 | -3.30 |
| IPI00296608 | Complement component C7 precursor | R.GGGAGFISGLSYLELDNPAGNKR.R    | 4 | 2.84 | 0.13 | -1.09 |
| IPI00296608 | Complement component C7 precursor | R.GQSISVTSIRPCAAET.Q           | 2 | 3.00 | 0.37 | -1.11 |
| IPI00296608 | Complement component C7 precursor | R.GQSISVTSIRPCAAETQ.-          | 2 | 5.34 | 0.50 | -3.58 |
| IPI00296608 | Complement component C7 precursor | R.GQSISVTSIRPCAAETQ.-          | 3 | 2.63 | 0.19 | -3.24 |
| IPI00296608 | Complement component C7 precursor | R.ILPLTVCK.M                   | 1 | 2.32 | 0.24 | -3.41 |
| IPI00296608 | Complement component C7 precursor | R.ILPLTVCK.M                   | 2 | 2.07 | 0.29 | -2.84 |
| IPI00296608 | Complement component C7 precursor | R.KVFSGDGK.D                   | 2 | 1.70 | 0.06 | -1.82 |
| IPI00296608 | Complement component C7 precursor | R.KVFSGDGKDFYR.L               | 2 | 3.90 | 0.35 | -4.59 |

|             |                                   |                                             |   |      |      |       |
|-------------|-----------------------------------|---------------------------------------------|---|------|------|-------|
| IPI00296608 | Complement component C7 precursor | R.KVFSGDGKDFYR.L                            | 3 | 2.21 | 0.18 | -2.98 |
| IPI00296608 | Complement component C7 precursor | R.LLEPHCFPLSLVPTFCPSPPALK.D                 | 3 | 5.03 | 0.40 | -3.97 |
| IPI00296608 | Complement component C7 precursor | R.LLEPHCFPLSLVPTFCPSPPALKDGFVQDEGTM*FPVGK.N | 4 | 5.43 | 0.45 | -5.23 |
| IPI00296608 | Complement component C7 precursor | R.LSGNVLSYTFQVK.I                           | 1 | 3.15 | 0.37 | -0.52 |
| IPI00296608 | Complement component C7 precursor | R.LSGNVLSYTFQVK.I                           | 2 | 4.78 | 0.42 | -4.23 |
| IPI00296608 | Complement component C7 precursor | R.RLIDQYGTHYLQSGSLGGEYR.V                   | 2 | 5.26 | 0.57 | -2.74 |
| IPI00296608 | Complement component C7 precursor | R.RLIDQYGTHYLQSGSLGGEYR.V                   | 3 | 6.12 | 0.56 | -2.65 |
| IPI00296608 | Complement component C7 precursor | R.RLIDQYGTHYLQSGSLGGEYR.V                   | 4 | 2.40 | 0.16 | -1.65 |
| IPI00296608 | Complement component C7 precursor | R.SCVGETTESTQCDEELEHLR.L                    | 2 | 4.73 | 0.61 | -2.75 |
| IPI00296608 | Complement component C7 precursor | R.SCVGETTESTQCDEELEHLR.L                    | 3 | 4.01 | 0.52 | -1.75 |
| IPI00296608 | Complement component C7 precursor | R.SVAVYGQYGGQPCVGNFETQSCEPTR.G              | 2 | 5.20 | 0.57 | -4.11 |
| IPI00296608 | Complement component C7 precursor | R.SVAVYGQYGGQPCVGNFETQSCEPTR.G              | 3 | 5.95 | 0.59 | -5.90 |
| IPI00296608 | Complement component C7 precursor | R.SYTSHTNEIHKGK.S                           | 2 | 3.74 | 0.44 | -4.78 |
| IPI00296608 | Complement component C7 precursor | R.SYTSHTNEIHKGK.S                           | 3 | 1.74 | 0.25 | -2.87 |
| IPI00296608 | Complement component C7 precursor | R.VLFYVDSEK.L                               | 1 | 2.39 | 0.27 | -2.05 |
| IPI00296608 | Complement component C7 precursor | R.VLFYVDSEK.L                               | 2 | 2.95 | 0.31 | -4.11 |
| IPI00296608 | Complement component C7 precursor | R.VLFYVDSEK.LK.Q                            | 2 | 3.85 | 0.42 | -3.38 |
| IPI00296608 | Complement component C7 precursor | R.VLFYVDSEK.LK.Q                            | 3 | 2.16 | 0.26 | -2.40 |
| IPI00296608 | Complement component C7 precursor | R.VLFYVDSEK.LKQDNFNSVEEK.K                  | 3 | 3.19 | 0.23 | -2.57 |
| IPI00296608 | Complement component C7 precursor | R.VLFYVDSEK.LKQDNFNSVEEKK.C                 | 3 | 4.39 | 0.37 | -3.51 |
| IPI00296608 | Complement component C7 precursor | R.VLFYVDSEK.LKQDNFNSVEEKK.C                 | 4 | 3.38 | 0.40 | -2.92 |
| IPI00296608 | Complement component C7 precursor | R.YSAWAESVTNLPQVIK.Q                        | 2 | 4.84 | 0.38 | -4.22 |
| IPI00296608 | Complement component C7 precursor | W.AESVTNLPQVIK.Q                            | 2 | 4.26 | 0.29 | -2.77 |
| IPI00296727 | Kinesin-like protein KIF2B        | K.VYGTFFFEIYGGKVYDLLNWKKK.L                 | 3 | 2.98 | 0.14 |       |
| IPI00296777 | SPARC-like protein 1 precursor    | A.LLM*EPTDDGNTTPR.N                         | 2 | 4.34 | 0.37 | -4.33 |
| IPI00296777 | SPARC-like protein 1 precursor    | A.PGVSSFTDSNQQESITKR.E                      | 2 | 4.65 | 0.46 | -3.68 |
| IPI00296777 | SPARC-like protein 1 precursor    | A.PGVSSFTDSNQQESITKR.E                      | 3 | 3.71 | 0.50 | -2.20 |
| IPI00296777 | SPARC-like protein 1 precursor    | E.KVHENENIGTTEPGEHQEAK.K                    | 3 | 4.58 | 0.34 | -3.90 |
| IPI00296777 | SPARC-like protein 1 precursor    | F.TDSNQQESITKR.E                            | 2 | 2.96 | 0.28 | -2.36 |
| IPI00296777 | SPARC-like protein 1 precursor    | G.LEAISNHKETEETK.T                          | 2 | 3.73 | 0.22 | -2.86 |
| IPI00296777 | SPARC-like protein 1 precursor    | H.SASDDYFIPSQAFLEAER.A                      | 2 | 4.06 | 0.42 | -1.56 |
| IPI00296777 | SPARC-like protein 1 precursor    | I.PSQAFLEAER.A                              | 2 | 3.40 | 0.28 | -1.31 |
| IPI00296777 | SPARC-like protein 1 precursor    | I.PTCTDFEVIQFPLR.M                          | 2 | 4.92 | 0.52 | -3.32 |
| IPI00296777 | SPARC-like protein 1 precursor    | K.ETAVSTEDDSSHK.A                           | 2 | 2.22 | 0.26 | -2.85 |
| IPI00296777 | SPARC-like protein 1 precursor    | K.ETAVSTEDDSSHKAEK.S                        | 2 | 4.09 | 0.46 | -1.33 |
| IPI00296777 | SPARC-like protein 1 precursor    | K.ETAVSTEDDSSHKAEK.S                        | 3 | 1.74 | 0.15 | -0.16 |
| IPI00296777 | SPARC-like protein 1 precursor    | K.GHQLQLDYFGACK.S                           | 2 | 4.44 | 0.43 | -4.28 |
| IPI00296777 | SPARC-like protein 1 precursor    | K.HIQETEWQSQEGK.T                           | 2 | 4.39 | 0.49 | -3.70 |
| IPI00296777 | SPARC-like protein 1 precursor    | K.HIQETEWQSQEGK.T                           | 3 | 3.50 | 0.28 | -3.32 |
| IPI00296777 | SPARC-like protein 1 precursor    | K.HSQGLRDQGNQEED.P                          | 2 | 3.71 | 0.52 | -0.56 |
| IPI00296777 | SPARC-like protein 1 precursor    | K.HSQGLRDQGNQEEDPNISNGEEEEKEPGEVGTNDNQR.K   | 4 | 5.92 | 0.55 | -4.64 |
| IPI00296777 | SPARC-like protein 1 precursor    | K.HSQGLRDQGNQEEDPNISNGEEEEKEPGEVGTNDNQR.K   | 5 | 4.93 | 0.46 | -4.04 |

|             |                                |                                            |   |      |      |       |
|-------------|--------------------------------|--------------------------------------------|---|------|------|-------|
| IPI00296777 | SPARC-like protein 1 precursor | K.HSQGLRDQGNQEOPNISNGEEEEKEPGEVGTHTNDNQR.K | 6 | 2.21 | 0.11 | -4.17 |
| IPI00296777 | SPARC-like protein 1 precursor | K.KAENSSNEEETSSEGNM*R.V                    | 2 | 4.62 | 0.64 | -3.71 |
| IPI00296777 | SPARC-like protein 1 precursor | K.KAENSSNEEETSSEGNM*R.V                    | 3 | 2.90 | 0.34 | -3.07 |
| IPI00296777 | SPARC-like protein 1 precursor | K.KLSENTDFLAPGV.S                          | 1 | 2.43 | 0.33 | 2.11  |
| IPI00296777 | SPARC-like protein 1 precursor | K.KLSENTDFLAPGVSSFT.D                      | 2 | 2.94 | 0.26 | -2.10 |
| IPI00296777 | SPARC-like protein 1 precursor | K.KLSENTDFLAPGVSSFTDSN.Q                   | 2 | 5.22 | 0.62 | -6.77 |
| IPI00296777 | SPARC-like protein 1 precursor | K.KLSENTDFLAPGVSSFTDSNQQES.I               | 2 | 5.00 | 0.54 | -5.01 |
| IPI00296777 | SPARC-like protein 1 precursor | K.KLSENTDFLAPGVSSFTDSNQQESIT.K             | 2 | 4.74 | 0.53 | -3.86 |
| IPI00296777 | SPARC-like protein 1 precursor | K.KLSENTDFLAPGVSSFTDSNQQESIT.K             | 3 | 4.43 | 0.38 | -3.92 |
| IPI00296777 | SPARC-like protein 1 precursor | K.KLSENTDFLAPGVSSFTDSNQQESITK.R            | 2 | 5.04 | 0.52 | -1.31 |
| IPI00296777 | SPARC-like protein 1 precursor | K.KLSENTDFLAPGVSSFTDSNQQESITK.R            | 3 | 6.67 | 0.46 | -4.21 |
| IPI00296777 | SPARC-like protein 1 precursor | K.KLSENTDFLAPGVSSFTDSNQQESITKR.E           | 2 | 4.36 | 0.52 | -2.93 |
| IPI00296777 | SPARC-like protein 1 precursor | K.KLSENTDFLAPGVSSFTDSNQQESITKR.E           | 3 | 7.09 | 0.60 | -4.47 |
| IPI00296777 | SPARC-like protein 1 precursor | K.KLSENTDFLAPGVSSFTDSNQQESITKR.E           | 4 | 3.08 | 0.40 | -3.43 |
| IPI00296777 | SPARC-like protein 1 precursor | K.KLSENTDFLAPGVSSFTDSNQQESITKREENQEQR.N    | 3 | 4.18 | 0.39 | -3.57 |
| IPI00296777 | SPARC-like protein 1 precursor | K.KLSENTDFLAPGVSSFTDSNQQESITKREENQEQR.N    | 4 | 5.13 | 0.38 | -3.68 |
| IPI00296777 | SPARC-like protein 1 precursor | K.KLSENTDFLAPGVSSFTDSNQQESITKREENQEQR.N    | 5 | 2.35 | 0.19 | -3.22 |
| IPI00296777 | SPARC-like protein 1 precursor | K.LSENTDFLAPGVSSFTDSNQQESITK.R             | 2 | 5.45 | 0.54 | -3.63 |
| IPI00296777 | SPARC-like protein 1 precursor | K.LSENTDFLAPGVSSFTDSNQQESITK.R             | 3 | 4.59 | 0.48 | -4.27 |
| IPI00296777 | SPARC-like protein 1 precursor | K.LSENTDFLAPGVSSFTDSNQQESITKR.E            | 2 | 4.02 | 0.38 | -2.22 |
| IPI00296777 | SPARC-like protein 1 precursor | K.LSENTDFLAPGVSSFTDSNQQESITKR.E            | 3 | 5.40 | 0.49 | -5.15 |
| IPI00296777 | SPARC-like protein 1 precursor | K.LSENTDFLAPGVSSFTDSNQQESITKR.E            | 4 | 2.74 | 0.12 | -1.38 |
| IPI00296777 | SPARC-like protein 1 precursor | K.LSENTDFLAPGVSSFTDSNQQESITKREENQEQR.N     | 3 | 3.70 | 0.28 | -1.99 |
| IPI00296777 | SPARC-like protein 1 precursor | K.M*QEDEFDQGNQEEDNSNAEM*EEENASNVNK.H       | 3 | 7.00 | 0.71 | -2.42 |
| IPI00296777 | SPARC-like protein 1 precursor | K.NILM*QLYEANSEHAGYLNEK.Q                  | 2 | 5.89 | 0.50 | -4.52 |
| IPI00296777 | SPARC-like protein 1 precursor | K.NILM*QLYEANSEHAGYLNEK.Q                  | 3 | 3.68 | 0.37 | -4.02 |
| IPI00296777 | SPARC-like protein 1 precursor | K.NYHM*YVYPVHWQFSELDQHPM*DR.V              | 3 | 3.79 | 0.38 | -4.12 |
| IPI00296777 | SPARC-like protein 1 precursor | K.NYHM*YVYPVHWQFSELDQHPM*DR.V              | 4 | 3.60 | 0.42 | -3.92 |
| IPI00296777 | SPARC-like protein 1 precursor | K.NYHM*YVYPVHWQFSELDQHPM*DR.V              | 5 | 2.39 | 0.20 | -3.05 |
| IPI00296777 | SPARC-like protein 1 precursor | K.QEEDNTQSDDILEESDQPTQVSK.M                | 2 | 4.30 | 0.52 | -0.91 |
| IPI00296777 | SPARC-like protein 1 precursor | K.QEEDNTQSDDILEESDQPTQVSK.M                | 3 | 4.70 | 0.47 | -2.08 |
| IPI00296777 | SPARC-like protein 1 precursor | K.RLLAGDHPIDLLLR.D                         | 2 | 3.68 | 0.35 | -3.29 |
| IPI00296777 | SPARC-like protein 1 precursor | K.RLLAGDHPIDLLLR.D                         | 3 | 3.20 | 0.24 | -2.30 |
| IPI00296777 | SPARC-like protein 1 precursor | K.RLLAGDHPIDLLLR.D                         | 4 | 2.89 | 0.25 | -4.52 |
| IPI00296777 | SPARC-like protein 1 precursor | K.SIPTCTDFEVIQFPLR.M                       | 2 | 4.58 | 0.38 | -4.04 |
| IPI00296777 | SPARC-like protein 1 precursor | K.SIPTCTDFEVIQFPLR.M                       | 3 | 4.30 | 0.25 | -4.76 |
| IPI00296777 | SPARC-like protein 1 precursor | K.SKEESHEQSAEQGK.S                         | 2 | 2.96 | 0.39 | -1.61 |
| IPI00296777 | SPARC-like protein 1 precursor | K.SKEESHEQSAEQGKSSSQELGLK.D                | 3 | 6.12 | 0.46 | -4.54 |
| IPI00296777 | SPARC-like protein 1 precursor | K.SKEESHEQSAEQGKSSSQELGLK.D                | 4 | 4.36 | 0.50 | -2.87 |
| IPI00296777 | SPARC-like protein 1 precursor | K.SSSQELGLK.D                              | 1 | 1.78 | 0.09 | -1.65 |
| IPI00296777 | SPARC-like protein 1 precursor | K.SSSQELGLK.D                              | 2 | 2.60 | 0.23 | -1.02 |
| IPI00296777 | SPARC-like protein 1 precursor | K.SSSQELGLKQEDS.D                          | 2 | 3.29 | 0.23 | -3.34 |

|             |                                |                                           |   |      |      |       |
|-------------|--------------------------------|-------------------------------------------|---|------|------|-------|
| IPI00296777 | SPARC-like protein 1 precursor | K.SSSQELGLKDQEDSDGDLS.V                   | 2 | 4.12 | 0.46 | -3.67 |
| IPI00296777 | SPARC-like protein 1 precursor | K.TGLEAISNHK.E                            | 1 | 2.45 | 0.29 | -3.92 |
| IPI00296777 | SPARC-like protein 1 precursor | K.TGLEAISNHK.E                            | 2 | 3.20 | 0.26 | -5.45 |
| IPI00296777 | SPARC-like protein 1 precursor | K.TGLEAISNHHKET.E                         | 2 | 3.11 | 0.40 | -2.00 |
| IPI00296777 | SPARC-like protein 1 precursor | K.TGLEAISNHHKETEE.K                       | 2 | 3.13 | 0.11 | 1.69  |
| IPI00296777 | SPARC-like protein 1 precursor | K.TGLEAISNHHKETE.EK.T                     | 2 | 4.72 | 0.49 | -4.51 |
| IPI00296777 | SPARC-like protein 1 precursor | K.TGLEAISNHHKETE.EK.T                     | 3 | 2.98 | 0.30 | -3.57 |
| IPI00296777 | SPARC-like protein 1 precursor | K.TGLEAISNHHKETE.EK.T                     | 4 | 3.16 | 0.33 | -5.06 |
| IPI00296777 | SPARC-like protein 1 precursor | K.TGLEAISNHHKETE.EK.T.V                   | 2 | 4.26 | 0.49 | -4.62 |
| IPI00296777 | SPARC-like protein 1 precursor | K.TGLEAISNHHKETE.EK.T.V                   | 3 | 3.50 | 0.44 | -2.11 |
| IPI00296777 | SPARC-like protein 1 precursor | K.TGLEAISNHHKETE.EKTVSEA.L                | 2 | 4.40 | 0.43 | -5.25 |
| IPI00296777 | SPARC-like protein 1 precursor | K.TGLEAISNHHKETE.EKTVSEA.L                | 3 | 4.78 | 0.47 | -3.08 |
| IPI00296777 | SPARC-like protein 1 precursor | K.TGLEAISNHHKETE.EKTVSEALLM*EPTDDGNTTPR.N | 3 | 6.57 | 0.57 | -3.74 |
| IPI00296777 | SPARC-like protein 1 precursor | K.TVSEALLM*EPTDDGNTTPR.N                  | 2 | 5.77 | 0.52 | -5.10 |
| IPI00296777 | SPARC-like protein 1 precursor | K.TVSEALLM*EPTDDGNTTPR.N                  | 3 | 4.57 | 0.42 | -4.14 |
| IPI00296777 | SPARC-like protein 1 precursor | K.VHENENIGTTEPGEHQ.E                      | 2 | 4.00 | 0.47 | -3.92 |
| IPI00296777 | SPARC-like protein 1 precursor | K.VHENENIGTTEPGEHQ.E.A                    | 2 | 4.87 | 0.59 | -4.73 |
| IPI00296777 | SPARC-like protein 1 precursor | K.VHENENIGTTEPGEHQ.E.A                    | 3 | 4.18 | 0.33 | -2.75 |
| IPI00296777 | SPARC-like protein 1 precursor | K.VHENENIGTTEPGEHQ.EA.K                   | 3 | 4.63 | 0.36 | -2.62 |
| IPI00296777 | SPARC-like protein 1 precursor | K.VHENENIGTTEPGEHQ.EAK.K                  | 2 | 6.56 | 0.60 | -3.69 |
| IPI00296777 | SPARC-like protein 1 precursor | K.VHENENIGTTEPGEHQ.EAK.K                  | 3 | 4.38 | 0.45 | -3.40 |
| IPI00296777 | SPARC-like protein 1 precursor | K.VHENENIGTTEPGEHQ.EAK.K                  | 4 | 2.53 | 0.23 | -2.93 |
| IPI00296777 | SPARC-like protein 1 precursor | K.VHENENIGTTEPGEHQ.EAKK.A                 | 3 | 3.68 | 0.32 | -3.27 |
| IPI00296777 | SPARC-like protein 1 precursor | L.LAGDHPIDLLLR.D                          | 2 | 3.10 | 0.39 | -2.70 |
| IPI00296777 | SPARC-like protein 1 precursor | L.LM*EPTDDGNTTPR.N                        | 2 | 4.38 | 0.42 | -3.65 |
| IPI00296777 | SPARC-like protein 1 precursor | L.M*EPTDDGNTTPR.N                         | 2 | 3.65 | 0.37 | -3.93 |
| IPI00296777 | SPARC-like protein 1 precursor | L.SENTDFLAPGVSSFTDSNQQESITKR.E            | 3 | 4.27 | 0.42 | -2.70 |
| IPI00296777 | SPARC-like protein 1 precursor | R.AEDEENEKETAVSTEDDSSHKA.A                | 3 | 4.19 | 0.49 | -3.21 |
| IPI00296777 | SPARC-like protein 1 precursor | R.AEDEENEKETAVSTEDDSSHKA.EK.S             | 3 | 5.77 | 0.54 | -4.90 |
| IPI00296777 | SPARC-like protein 1 precursor | R.AEDEENEKETAVSTEDDSSHKA.EK.S             | 4 | 2.60 | 0.15 | -2.68 |
| IPI00296777 | SPARC-like protein 1 precursor | R.AEDEENEKETAVSTEDDSSHKA.EK.S             | 5 | 2.37 | 0.15 | -3.04 |
| IPI00296777 | SPARC-like protein 1 precursor | R.AQSIAYHLK                               | 1 | 1.97 | 0.28 | -2.37 |
| IPI00296777 | SPARC-like protein 1 precursor | R.AQSIAYHLK.I                             | 1 | 2.10 | 0.08 | -3.85 |
| IPI00296777 | SPARC-like protein 1 precursor | R.AQSIAYHLK.I                             | 2 | 3.03 | 0.32 | -2.51 |
| IPI00296777 | SPARC-like protein 1 precursor | R.DQGNQE QDPNISNGEEEEKEPGEVGT HNDN.Q      | 3 | 4.11 | 0.47 | -3.21 |
| IPI00296777 | SPARC-like protein 1 precursor | R.DQGNQE QDPNISNGEEEEKEPGEVGT HNDNQER.K   | 3 | 5.61 | 0.62 | -3.24 |
| IPI00296777 | SPARC-like protein 1 precursor | R.DQGNQE QDPNISNGEEEEKEPGEVGT HNDNQER.K   | 4 | 5.03 | 0.56 | -4.37 |
| IPI00296777 | SPARC-like protein 1 precursor | R.DQGNQE QDPNISNGEEEEKEPGEVGT HNDNQERK.T  | 4 | 4.28 | 0.46 | -1.26 |
| IPI00296777 | SPARC-like protein 1 precursor | R.DQGNQE QDPNISNGEEEEKEPGEVGT HNDNQERK.T  | 5 | 2.77 | 0.31 | -0.98 |
| IPI00296777 | SPARC-like protein 1 precursor | R.EHANSKQEEDNTQSDDILEESDQPTQVSK.M         | 3 | 6.52 | 0.55 | -3.32 |
| IPI00296777 | SPARC-like protein 1 precursor | R.EHANSKQEEDNTQSDDILEESDQPTQVSK.M         | 4 | 4.41 | 0.39 | -2.71 |
| IPI00296777 | SPARC-like protein 1 precursor | R.EKVHENENIGTTEPGEHQ.E.A                  | 3 | 4.23 | 0.33 | -6.64 |

|             |                                          |                                            |   |      |      |       |
|-------------|------------------------------------------|--------------------------------------------|---|------|------|-------|
| IPI00296777 | SPARC-like protein 1 precursor           | R.EKVHENENIGTTEPGEHQEA.K                   | 2 | 5.49 | 0.56 | -4.36 |
| IPI00296777 | SPARC-like protein 1 precursor           | R.EKVHENENIGTTEPGEHQEA.K                   | 3 | 5.37 | 0.45 | -3.41 |
| IPI00296777 | SPARC-like protein 1 precursor           | R.EKVHENENIGTTEPGEHQEA.K                   | 2 | 4.68 | 0.50 | -3.32 |
| IPI00296777 | SPARC-like protein 1 precursor           | R.EKVHENENIGTTEPGEHQEA.K                   | 3 | 4.85 | 0.44 | -3.97 |
| IPI00296777 | SPARC-like protein 1 precursor           | R.EKVHENENIGTTEPGEHQEA.K                   | 4 | 2.97 | 0.32 | -3.13 |
| IPI00296777 | SPARC-like protein 1 precursor           | R.FFECDPNKDK.H                             | 2 | 2.55 | 0.23 |       |
| IPI00296777 | SPARC-like protein 1 precursor           | R.FFECDPNKDKHITLK.E                        | 4 | 2.59 | 0.17 | 0.67  |
| IPI00296777 | SPARC-like protein 1 precursor           | R.HSASDDYFIPSQA.F                          | 1 | 2.67 | 0.45 | -2.95 |
| IPI00296777 | SPARC-like protein 1 precursor           | R.HSASDDYFIPSQAFLE.A                       | 2 | 3.68 | 0.49 | -4.11 |
| IPI00296777 | SPARC-like protein 1 precursor           | R.HSASDDYFIPSQAFLEAER.A                    | 2 | 6.39 | 0.60 | -7.58 |
| IPI00296777 | SPARC-like protein 1 precursor           | R.HSASDDYFIPSQAFLEAER.A                    | 3 | 4.70 | 0.34 | -3.48 |
| IPI00296777 | SPARC-like protein 1 precursor           | R.KTELPREHANSKQEEDNTQSDDILEESDQPTQVSK.M    | 5 | 3.17 | 0.34 | -3.00 |
| IPI00296777 | SPARC-like protein 1 precursor           | R.LLAGDHPIDLLLR.D                          | 1 | 2.65 | 0.42 | -1.58 |
| IPI00296777 | SPARC-like protein 1 precursor           | R.LLAGDHPIDLLLR.D                          | 2 | 4.50 | 0.43 | -3.28 |
| IPI00296777 | SPARC-like protein 1 precursor           | R.NHGVDDDDGDDGDDGGTDGPR.H                  | 2 | 5.16 | 0.68 | -4.11 |
| IPI00296777 | SPARC-like protein 1 precursor           | R.NHGVDDDDGDDGDDGGTDGPR.H                  | 3 | 6.20 | 0.74 | -4.50 |
| IPI00296777 | SPARC-like protein 1 precursor           | R.VHAVDSCM*SFQCK.R                         | 2 | 4.39 | 0.56 | -4.79 |
| IPI00296777 | SPARC-like protein 1 precursor           | R.VHAVDSCM*SFQCK.R                         | 3 | 2.72 | 0.16 | -3.56 |
| IPI00296777 | SPARC-like protein 1 precursor           | R.VLTHSELAPLR.A                            | 1 | 3.11 | 0.20 | -3.38 |
| IPI00296777 | SPARC-like protein 1 precursor           | R.VLTHSELAPLR.A                            | 2 | 3.28 | 0.30 | -3.27 |
| IPI00296777 | SPARC-like protein 1 precursor           | R.VLTHSELAPLR.A                            | 3 | 3.74 | 0.16 | -3.98 |
| IPI00296777 | SPARC-like protein 1 precursor           | S.DDILEESDQPTQVSK.M                        | 2 | 3.63 | 0.40 | -2.32 |
| IPI00296777 | SPARC-like protein 1 precursor           | S.FTDSNQQESITK.R                           | 2 | 3.98 | 0.35 | -3.36 |
| IPI00296777 | SPARC-like protein 1 precursor           | S.FTDSNQQESITKR.E                          | 2 | 4.14 | 0.37 | -1.37 |
| IPI00296777 | SPARC-like protein 1 precursor           | T.GLEAISNHKETEEL.T                         | 2 | 4.15 | 0.42 | -3.40 |
| IPI00296866 | interphotoreceptor matrix proteoglycan 2 | K.SAVSFLLEESTDLSLTK.K                      | 2 | 3.73 | 0.41 | -4.78 |
| IPI00296913 | ADP-sugar pyrophosphatase                | R.VYSYALALK.H                              | 2 | 2.56 | 0.24 | -1.61 |
| IPI00296922 | Laminin subunit beta-2 precursor         | K.AM*DYDLLLR.L                             | 2 | 2.57 | 0.14 | -2.89 |
| IPI00296922 | Laminin subunit beta-2 precursor         | K.LGIVQGIVGAR.N                            | 2 | 3.74 | 0.22 | -1.35 |
| IPI00296922 | Laminin subunit beta-2 precursor         | K.TFRPAAM*LVER.S                           | 3 | 3.79 | 0.17 | -0.95 |
| IPI00296922 | Laminin subunit beta-2 precursor         | R.AEQLRDEAR.D                              | 2 | 2.26 | 0.05 | -1.49 |
| IPI00296922 | Laminin subunit beta-2 precursor         | R.AGNLSLAASTAEETAGSAQGR.A                  | 2 | 4.92 | 0.58 | -0.94 |
| IPI00296922 | Laminin subunit beta-2 precursor         | R.AGNLSLAASTAEETAGSAQGR.A                  | 3 | 3.49 | 0.40 | -1.65 |
| IPI00296922 | Laminin subunit beta-2 precursor         | R.ALAEGGSILSR.V                            | 2 | 2.59 | 0.18 | -2.18 |
| IPI00296922 | Laminin subunit beta-2 precursor         | R.AQGIAQGAIR.G                             | 2 | 2.96 | 0.26 | 0.45  |
| IPI00296922 | Laminin subunit beta-2 precursor         | R.DLLQAAQDKLQR.L                           | 2 | 3.16 | 0.34 | -2.11 |
| IPI00296922 | Laminin subunit beta-2 precursor         | R.DTEQTLYQVQER.M                           | 2 | 3.75 | 0.31 | -2.38 |
| IPI00296922 | Laminin subunit beta-2 precursor         | R.EIGEATEHLTQLEADLTDVQDENFNANHALSGLER.D    | 3 | 7.27 | 0.61 | -4.26 |
| IPI00296922 | Laminin subunit beta-2 precursor         | R.EIGEATEHLTQLEADLTDVQDENFNANHALSGLER.D    | 4 | 4.88 | 0.32 | -3.18 |
| IPI00296922 | Laminin subunit beta-2 precursor         | R.GQVEQANQELQELIQSVK.D                     | 2 | 5.91 | 0.44 | -3.89 |
| IPI00296922 | Laminin subunit beta-2 precursor         | R.GQVEQANQELQELIQSVKDFLNQEGADPDSIEM*VATR.V | 4 | 4.19 | 0.20 | -4.40 |
| IPI00296922 | Laminin subunit beta-2 precursor         | R.GQVLDVVER.L                              | 2 | 2.57 | 0.15 | -2.55 |



|             |                                                            |                                |   |      |      |       |
|-------------|------------------------------------------------------------|--------------------------------|---|------|------|-------|
| IPI00296922 | Laminin subunit beta-2 precursor                           | R.HTQAEIQR.A                   | 2 | 1.88 | 0.21 | -1.78 |
| IPI00296922 | Laminin subunit beta-2 precursor                           | R.IQGTLPQPHAR.Y                | 2 | 2.43 | 0.26 | -1.88 |
| IPI00296922 | Laminin subunit beta-2 precursor                           | R.IQNVVTSFAPQRR.A              | 2 | 1.92 | 0.11 | -2.83 |
| IPI00296922 | Laminin subunit beta-2 precursor                           | R.LQEGQTLEFLVASVPK.A           | 2 | 4.30 | 0.47 | -3.60 |
| IPI00296922 | Laminin subunit beta-2 precursor                           | R.TGGSAPQETPYSGPGLLIDSLVLLPR.V | 2 | 4.45 | 0.54 | -6.55 |
| IPI00296922 | Laminin subunit beta-2 precursor                           | R.TGGSAPQETPYSGPGLLIDSLVLLPR.V | 3 | 3.28 | 0.19 | -4.07 |
| IPI00296922 | Laminin subunit beta-2 precursor                           | R.VLELSIPASAEQIHLAIAER.V       | 3 | 2.49 | 0.26 | -3.98 |
| IPI00296922 | Laminin subunit beta-2 precursor                           | R.YFSYDCGADFPVPLAPPR.H         | 2 | 3.37 | 0.32 | -2.89 |
| IPI00296922 | Laminin subunit beta-2 precursor                           | R.YLIFPNPVCLEPGISYK.L          | 2 | 4.03 | 0.42 | -4.08 |
| IPI00296922 | Laminin subunit beta-2 precursor                           | R.YSEIEPSTEGEVIYR.V            | 2 | 3.67 | 0.31 | -0.71 |
| IPI00296992 | AXL receptor tyrosine kinase isoform 1                     | K.TSSFSCAEHNAK.G               | 2 | 2.83 | 0.18 |       |
| IPI00296992 | AXL receptor tyrosine kinase isoform 1                     | R.APLQGTLLGYR.L                | 1 | 3.36 | 0.43 | -2.16 |
| IPI00296992 | AXL receptor tyrosine kinase isoform 1                     | R.APLQGTLLGYR.L                | 2 | 3.62 | 0.39 | -2.13 |
| IPI00296992 | AXL receptor tyrosine kinase isoform 1                     | R.LAYQGQDTPEVLM*DIGLR.Q        | 2 | 5.42 | 0.51 | -4.33 |
| IPI00296992 | AXL receptor tyrosine kinase isoform 1                     | R.LAYQGQDTPEVLM*DIGLR.Q        | 3 | 4.02 | 0.33 | -2.65 |
| IPI00296992 | AXL receptor tyrosine kinase isoform 1                     | R.TATITVLPQQPR.N               | 1 | 2.35 | 0.38 | -3.04 |
| IPI00296992 | AXL receptor tyrosine kinase isoform 1                     | R.TATITVLPQQPR.N               | 2 | 3.43 | 0.39 | -3.17 |
| IPI00297040 | Serine protease inhibitor Kazal-type 6 precursor           | K.ISLKHGPK.C                   | 1 | 1.61 | 0.13 | -4.91 |
| IPI00297124 | Isoform 1 of Interleukin-6 receptor subunit beta precursor | A.YTDEGGKDGPEFTFTPK.F          | 2 | 4.71 | 0.51 | -3.26 |
| IPI00297124 | Isoform 1 of Interleukin-6 receptor subunit beta precursor | A.YTDEGGKDGPEFTFTPK.F          | 3 | 3.62 | 0.41 | -2.76 |
| IPI00297124 | Isoform 1 of Interleukin-6 receptor subunit beta precursor | K.CYLITVTPVYADGPGSPESIK.A      | 2 | 5.61 | 0.54 | -2.95 |
| IPI00297124 | Isoform 1 of Interleukin-6 receptor subunit beta precursor | K.DNM*LWVWTTTPR.E              | 2 | 3.27 | 0.39 | -4.46 |
| IPI00297124 | Isoform 1 of Interleukin-6 receptor subunit beta precursor | K.IDPSHTQGYR.T                 | 2 | 2.27 | 0.41 | -3.49 |
| IPI00297124 | Isoform 1 of Interleukin-6 receptor subunit beta precursor | K.ILDYEVTLTR.W                 | 1 | 2.39 | 0.20 | -4.07 |
| IPI00297124 | Isoform 1 of Interleukin-6 receptor subunit beta precursor | K.ILDYEVTLTR.W                 | 2 | 3.94 | 0.40 | -4.32 |
| IPI00297124 | Isoform 1 of Interleukin-6 receptor subunit beta precursor | K.LTWTNPSIK.S                  | 2 | 2.07 | 0.07 | -2.13 |
| IPI00297124 | Isoform 1 of Interleukin-6 receptor subunit beta precursor | K.NEAVLEWDQLPVDVQNGFIR.N       | 3 | 4.32 | 0.40 | -2.33 |
| IPI00297124 | Isoform 1 of Interleukin-6 receptor subunit beta precursor | K.SDAAVLTIPACDFQATHPVM*DLK.A   | 2 | 2.90 | 0.23 | -6.53 |
| IPI00297124 | Isoform 1 of Interleukin-6 receptor subunit beta precursor | K.SDAAVLTIPACDFQATHPVM*DLK.A   | 3 | 2.65 | 0.11 | -3.96 |
| IPI00297124 | Isoform 1 of Interleukin-6 receptor subunit beta precursor | K.TNHFTIPK.E                   | 1 | 2.03 | 0.14 | -3.95 |

|             |                                                            |                                   |   |      |      |       |
|-------------|------------------------------------------------------------|-----------------------------------|---|------|------|-------|
| IPI00297124 | Isoform 1 of Interleukin-6 receptor subunit beta precursor | K.VKPNPPHNLSVINSEELSSILK.L        | 2 | 4.23 | 0.51 | -3.51 |
| IPI00297124 | Isoform 1 of Interleukin-6 receptor subunit beta precursor | K.VKPNPPHNLSVINSEELSSILK.L        | 3 | 6.49 | 0.52 | -5.04 |
| IPI00297124 | Isoform 1 of Interleukin-6 receptor subunit beta precursor | K.VKPNPPHNLSVINSEELSSILK.L        | 4 | 3.42 | 0.25 | -2.47 |
| IPI00297124 | Isoform 1 of Interleukin-6 receptor subunit beta precursor | K.VTSDHINFDPVYK.V                 | 2 | 3.15 | 0.31 | -5.07 |
| IPI00297124 | Isoform 1 of Interleukin-6 receptor subunit beta precursor | K.VTSDHINFDPVYK.V                 | 3 | 2.52 | 0.19 | 1.07  |
| IPI00297124 | Isoform 1 of Interleukin-6 receptor subunit beta precursor | K.YNIQYR.T                        | 1 | 1.83 | 0.14 | -1.01 |
| IPI00297124 | Isoform 1 of Interleukin-6 receptor subunit beta precursor | K.YNIQYR.T                        | 2 | 2.20 | 0.13 | -1.81 |
| IPI00297124 | Isoform 1 of Interleukin-6 receptor subunit beta precursor | R.M*AAYTDEGGKDGPEFTFTPK.F         | 2 | 4.59 | 0.55 | -3.12 |
| IPI00297124 | Isoform 1 of Interleukin-6 receptor subunit beta precursor | R.M*AAYTDEGGKDGPEFTFTPK.F         | 3 | 3.93 | 0.52 | -2.83 |
| IPI00297124 | Isoform 1 of Interleukin-6 receptor subunit beta precursor | R.SSFTVQDLKPFTEYVFR.I             | 2 | 4.67 | 0.41 | -4.00 |
| IPI00297124 | Isoform 1 of Interleukin-6 receptor subunit beta precursor | R.SSFTVQDLKPFTEYVFR.I             | 3 | 4.82 | 0.42 | -4.35 |
| IPI00297124 | Isoform 1 of Interleukin-6 receptor subunit beta precursor | R.YLATLTVR.N                      | 2 | 2.31 | 0.14 | -1.36 |
| IPI00297180 | Cadherin-9 precursor                                       | K.DNTAGIM*TR.K                    | 2 | 1.99 | 0.22 | -2.46 |
| IPI00297180 | Cadherin-9 precursor                                       | K.LHTDQDKGDGNLK.Y                 | 2 | 3.62 | 0.38 | -0.63 |
| IPI00297181 | Cadherin-7 precursor                                       | K.IQDINDNEPK.F                    | 2 | 3.38 | 0.25 | -3.72 |
| IPI00297181 | Cadherin-7 precursor                                       | K.RLDREEQAYYTLR.A                 | 3 | 2.54 | 0.10 | -2.44 |
| IPI00297181 | Cadherin-7 precursor                                       | R.VVYSILQGQPYFSVEPK.T             | 2 | 3.45 | 0.15 |       |
| IPI00297188 | Brain-specific angiogenesis inhibitor 2 precursor          | K.NFVQLCLSAPSEAPR.L               | 2 | 5.38 | 0.46 | -4.53 |
| IPI00297188 | Brain-specific angiogenesis inhibitor 2 precursor          | L.APAALAFR.F                      | 1 | 2.10 | 0.23 | -2.33 |
| IPI00297188 | Brain-specific angiogenesis inhibitor 2 precursor          | R.LLAPAALAFR.F                    | 1 | 1.92 | 0.27 | -2.56 |
| IPI00297188 | Brain-specific angiogenesis inhibitor 2 precursor          | R.LLAPAALAFR.F                    | 2 | 3.60 | 0.24 | -1.89 |
| IPI00297188 | Brain-specific angiogenesis inhibitor 2 precursor          | R.YGEEPEEPEPK.V.K.T               | 2 | 3.43 | 0.24 | -2.02 |
| IPI00297208 | similar to Myosin-10                                       | L.EVLRLEEFIQNK.T                  | 1 | 4.33 | 0.12 |       |
| IPI00297224 | Sushi domain-containing protein 5                          | K.GSGEQQIM*R.A                    | 2 | 2.85 | 0.16 | -3.13 |
| IPI00297224 | Sushi domain-containing protein 5                          | R.ELM*EDSRTEADED RGQGSSEEAPKQD.R  | 3 | 3.51 | 0.41 | -2.68 |
| IPI00297224 | Sushi domain-containing protein 5                          | R.ELM*EDSRTEADED RGQGSSEEAPKQDR.L | 4 | 4.40 | 0.43 | -4.24 |
| IPI00297224 | Sushi domain-containing protein 5                          | R.GAHLASADELR.R                   | 2 | 2.19 | 0.19 | -2.25 |
| IPI00297224 | Sushi domain-containing protein 5                          | R.GAHLASADELRR.V                  | 3 | 2.86 | 0.32 | -4.60 |
| IPI00297224 | Sushi domain-containing protein 5                          | R.LVSISVGR.E                      | 1 | 1.30 | 0.09 | -2.93 |
| IPI00297224 | Sushi domain-containing protein 5                          | R.TEADED RGQGSSEEAPKQDR.L         | 3 | 4.55 | 0.44 | -2.73 |

|             |                                                         |                               |   |      |      |       |
|-------------|---------------------------------------------------------|-------------------------------|---|------|------|-------|
| IPI00297224 | Sushi domain-containing protein 5                       | R.TGLEM*GDELLYVCAPGHIM*GHR.E  | 3 | 3.10 | 0.37 | -2.72 |
| IPI00297224 | Sushi domain-containing protein 5                       | R.TGLEM*GDELLYVCAPGHIM*GHR.E  | 4 | 3.02 | 0.23 | -2.83 |
| IPI00297251 | Isoform 2 of Probable E3 ubiquitin-protein ligase MGRN1 | F.ITEEVDESSSPQQGTR.A          | 2 | 4.42 | 0.31 | -2.76 |
| IPI00297252 | Isoform 1 of Extracellular sulfatase Sulf-2 precursor   | K.LHIDHEIETLQNK.I             | 3 | 3.92 | 0.28 | -1.30 |
| IPI00297252 | Isoform 1 of Extracellular sulfatase Sulf-2 precursor   | R.SVAIEVDGR.V                 | 1 | 1.68 | 0.07 | -3.26 |
| IPI00297252 | Isoform 1 of Extracellular sulfatase Sulf-2 precursor   | R.SVAIEVDGR.V                 | 2 | 2.82 | 0.26 | -3.10 |
| IPI00297252 | Isoform 1 of Extracellular sulfatase Sulf-2 precursor   | R.VYHVGLGDAAQPR.N             | 1 | 3.36 | 0.34 | -3.01 |
| IPI00297252 | Isoform 1 of Extracellular sulfatase Sulf-2 precursor   | R.VYHVGLGDAAQPR.N             | 2 | 3.57 | 0.33 | -3.78 |
| IPI00297252 | Isoform 1 of Extracellular sulfatase Sulf-2 precursor   | R.VYHVGLGDAAQPR.N             | 3 | 4.60 | 0.26 | -3.76 |
| IPI00297263 | Isoform 1 of Protein HEG homolog 1 precursor            | K.EGVM*VQTSGK.S               | 2 | 2.38 | 0.42 | -4.35 |
| IPI00297263 | Isoform 1 of Protein HEG homolog 1 precursor            | K.SGTASEM*GTER.A              | 2 | 1.88 | 0.07 | -2.42 |
| IPI00297263 | Isoform 1 of Protein HEG homolog 1 precursor            | K.TM*HVATVFTDGGPR.T           | 3 | 2.74 | 0.06 | -2.46 |
| IPI00297263 | Isoform 1 of Protein HEG homolog 1 precursor            | R.ALSLAPLAGAGLELQLER.R        | 2 | 4.12 | 0.44 | -3.47 |
| IPI00297263 | Isoform 1 of Protein HEG homolog 1 precursor            | R.RALSLAPLAGAGLELQLER.R       | 3 | 2.78 | 0.18 | -1.41 |
| IPI00297263 | Isoform 1 of Protein HEG homolog 1 precursor            | R.SLTVSLGPVSK.T               | 2 | 3.19 | 0.26 | -2.13 |
| IPI00297263 | Isoform 1 of Protein HEG homolog 1 precursor            | R.SYSESSSTSSSESLNSSAPR.G      | 2 | 5.48 | 0.53 | -3.33 |
| IPI00297263 | Isoform 1 of Protein HEG homolog 1 precursor            | R.TSSDHTDHTYLSSTFTK.G         | 2 | 4.01 | 0.53 | -3.46 |
| IPI00297263 | Isoform 1 of Protein HEG homolog 1 precursor            | R.TSSDHTDHTYLSSTFTKGER.A      | 3 | 4.63 | 0.45 | -3.16 |
| IPI00297263 | Isoform 1 of Protein HEG homolog 1 precursor            | R.VTGNPGDEEFIEPSTENEFGLTSLR.W | 2 | 4.76 | 0.43 | -5.98 |
| IPI00297263 | Isoform 1 of Protein HEG homolog 1 precursor            | R.VTGNPGDEEFIEPSTENEFGLTSLR.W | 3 | 4.96 | 0.46 | -4.31 |
| IPI00297277 | Isoform 1 of RING finger protein 150 precursor          | R.GEVVM*ASSAHDR.L             | 2 | 3.32 | 0.45 | -2.65 |
| IPI00297277 | Isoform 1 of RING finger protein 150 precursor          | R.GEVVM*ASSAHDR.L             | 3 | 2.03 | 0.18 | -3.71 |
| IPI00297284 | Insulin-like growth factor-binding protein 2 precursor  | A.PPAVAAVAGGAR.M              | 2 | 4.57 | 0.50 | -2.21 |
| IPI00297284 | Insulin-like growth factor-binding protein 2 precursor  | F.YNEQGEAR.G                  | 2 | 3.26 | 0.23 | -1.03 |
| IPI00297284 | Insulin-like growth factor-binding protein 2 precursor  | K.GGKHHLGLEEPK.K              | 2 | 2.30 | 0.30 | -3.38 |
| IPI00297284 | Insulin-like growth factor-binding protein 2 precursor  | K.HHLGLEEPK.K                 | 2 | 2.53 | 0.19 | -3.22 |
| IPI00297284 | Insulin-like growth factor-binding protein 2 precursor  | K.LIQGAPTIR.G                 | 1 | 2.26 | 0.19 | -2.71 |
| IPI00297284 | Insulin-like growth factor-binding protein 2 precursor  | K.LIQGAPTIRGDPECHLFYNEQGEAR.G | 3 | 4.29 | 0.36 | -3.06 |

|             |                                                        |                                                    |   |      |      |       |
|-------------|--------------------------------------------------------|----------------------------------------------------|---|------|------|-------|
| IPI00297284 | Insulin-like growth factor-binding protein 2 precursor | K.SGM*KELAVFR.E                                    | 1 | 1.32 | 0.10 | -1.81 |
| IPI00297284 | Insulin-like growth factor-binding protein 2 precursor | K.SGM*KELAVFR.E                                    | 2 | 2.87 | 0.15 | 0.06  |
| IPI00297284 | Insulin-like growth factor-binding protein 2 precursor | R.DAEYGASPEQVADNGDDHSEGLVENVHVDSTM*NM*LGGGGSAGR.K  | 3 | 4.83 | 0.56 | -2.67 |
| IPI00297284 | Insulin-like growth factor-binding protein 2 precursor | R.DAEYGASPEQVADNGDDHSEGLVENVHVDSTM*NM*LGGGGSAGR.K  | 4 | 5.22 | 0.57 | -2.18 |
| IPI00297284 | Insulin-like growth factor-binding protein 2 precursor | R.EPGCGCCSVCAR.L                                   | 2 | 2.29 | 0.46 | -2.57 |
| IPI00297284 | Insulin-like growth factor-binding protein 2 precursor | R.GDPECHLFYNEQQEAR.G                               | 3 | 2.97 | 0.29 | -2.26 |
| IPI00297284 | Insulin-like growth factor-binding protein 2 precursor | R.GECWCVPNTGK.L                                    | 2 | 4.09 | 0.44 | -3.54 |
| IPI00297284 | Insulin-like growth factor-binding protein 2 precursor | R.LAACGPPPVAPPAVAAVAGGAR.M                         | 2 | 5.61 | 0.58 | -3.17 |
| IPI00297284 | Insulin-like growth factor-binding protein 2 precursor | R.LAACGPPPVAPPAVAAVAGGAR.M                         | 3 | 3.90 | 0.35 | -4.80 |
| IPI00297284 | Insulin-like growth factor-binding protein 2 precursor | R.LEGEACGVYTPR.C                                   | 2 | 3.99 | 0.44 | -3.49 |
| IPI00297284 | Insulin-like growth factor-binding protein 2 precursor | R.RDAEYGASPEQVADNGDDHSEGLVENVHVDSTM*NM*LGGGGSAGR.K | 5 | 3.80 | 0.39 | -1.07 |
| IPI00297284 | Insulin-like growth factor-binding protein 2 precursor | R.TPCQQELDQVLER.I                                  | 2 | 4.06 | 0.24 |       |
| IPI00297288 | Cdc42 GTPase-activating protein                        | R.ELPNLLTYELYEK.F                                  | 2 | 2.65 | 0.11 | 0.08  |
| IPI00297444 | Isoform 1 of CD177 antigen precursor                   | R.GGGIFSNLR.V                                      | 2 | 2.44 | 0.19 | -0.97 |
| IPI00297487 | Cathepsin H precursor                                  | A.AELSVNSLEK.F                                     | 1 | 2.04 | 0.17 | -4.07 |
| IPI00297487 | Cathepsin H precursor                                  | K.GIM*GEDTYPYQGK.D                                 | 2 | 3.84 | 0.49 | -4.01 |
| IPI00297487 | Cathepsin H precursor                                  | K.GNFVSPVK.N                                       | 1 | 2.17 | 0.28 | 0.24  |
| IPI00297487 | Cathepsin H precursor                                  | K.GNFVSPVK.N                                       | 2 | 2.12 | 0.13 | -1.19 |
| IPI00297487 | Cathepsin H precursor                                  | K.M*ALNQFSDM*SFAEIK.H                              | 2 | 5.11 | 0.38 | -5.67 |
| IPI00297487 | Cathepsin H precursor                                  | K.M*LSLAEQQLVDCAQDFNNHGCQGGLPSQAFEYILYNK.G         | 3 | 6.85 | 0.55 | -3.39 |
| IPI00297487 | Cathepsin H precursor                                  | K.M*LSLAEQQLVDCAQDFNNHGCQGGLPSQAFEYILYNK.G         | 4 | 6.55 | 0.50 | -4.34 |
| IPI00297487 | Cathepsin H precursor                                  | K.NQGACGSCWTFSTTGALESIAIATGK.M                     | 3 | 4.92 | 0.46 | -5.18 |
| IPI00297487 | Cathepsin H precursor                                  | K.TPDKVNHAVLAVGYGEK.N                              | 2 | 5.98 | 0.55 | -3.41 |
| IPI00297487 | Cathepsin H precursor                                  | K.TPDKVNHAVLAVGYGEK.N                              | 3 | 4.17 | 0.42 | -1.88 |
| IPI00297487 | Cathepsin H precursor                                  | K.TPDKVNHAVLAVGYGEK.N                              | 4 | 2.88 | 0.18 | -0.16 |
| IPI00297487 | Cathepsin H precursor                                  | K.TYSTEEYHHR.L                                     | 2 | 2.58 | 0.43 | -3.87 |
| IPI00297487 | Cathepsin H precursor                                  | R.KTYSTEEYHHR.L                                    | 2 | 3.69 | 0.48 | -6.24 |
| IPI00297550 | Coagulation factor XIII A chain precursor              | K.KPLNTEGVM*K.S                                    | 2 | 3.00 | 0.16 |       |
| IPI00297646 | Collagen alpha-1(I) chain precursor                    | K.ALLLQGSNEIEIR.A                                  | 2 | 3.64 | 0.34 | -5.13 |
| IPI00297646 | Collagen alpha-1(I) chain precursor                    | K.NSVAYM*DQQTGNLK.K                                | 2 | 3.93 | 0.38 | -2.90 |

|             |                                                    |                                      |   |      |      |       |
|-------------|----------------------------------------------------|--------------------------------------|---|------|------|-------|
| IPI00297646 | Collagen alpha-1(I) chain precursor                | K.NSVAYM*DQQTGNLKK.A                 | 2 | 4.30 | 0.45 | -2.94 |
| IPI00297646 | Collagen alpha-1(I) chain precursor                | K.NSVAYM*DQQTGNLKK.A                 | 3 | 2.14 | 0.22 | -1.85 |
| IPI00297646 | Collagen alpha-1(I) chain precursor                | K.SGDRGETGPAGPAGVGPVG.A              | 2 | 4.71 | 0.60 | -2.08 |
| IPI00297646 | Collagen alpha-1(I) chain precursor                | K.SGDRGETGPAGPAGVGPVGAR.G            | 2 | 5.19 | 0.55 | -3.20 |
| IPI00297646 | Collagen alpha-1(I) chain precursor                | K.SGDRGETGPAGPAGVGPVGAR.G            | 3 | 4.57 | 0.41 | -2.17 |
| IPI00297646 | Collagen alpha-1(I) chain precursor                | K.SGEYWIDPNQGCNLDAIK.V               | 2 | 5.27 | 0.51 | -1.94 |
| IPI00297646 | Collagen alpha-1(I) chain precursor                | K.SLSQQIENIR.S                       | 1 | 2.13 | 0.13 | -2.93 |
| IPI00297646 | Collagen alpha-1(I) chain precursor                | K.SLSQQIENIR.S                       | 2 | 3.79 | 0.17 | -3.98 |
| IPI00297646 | Collagen alpha-1(I) chain precursor                | K.STGGISVPGPM*GPSGPR.G               | 2 | 2.23 | 0.16 | -3.81 |
| IPI00297646 | Collagen alpha-1(I) chain precursor                | K.TSRLPIIDVAPLDVAGAPDQEFQFDVGPVCF.L- | 3 | 4.84 | 0.49 | -4.15 |
| IPI00297646 | Collagen alpha-1(I) chain precursor                | K.VFCNM*ETGETCVYPTQPSVAQK.N          | 2 | 3.95 | 0.40 | -3.24 |
| IPI00297646 | Collagen alpha-1(I) chain precursor                | K.VFCNM*ETGETCVYPTQPSVAQK.N          | 3 | 4.63 | 0.49 | -2.58 |
| IPI00297646 | Collagen alpha-1(I) chain precursor                | K.VLCDDVICDETK.N                     | 2 | 4.33 | 0.47 | -1.94 |
| IPI00297646 | Collagen alpha-1(I) chain precursor                | R.DLEVDTTLK.S                        | 1 | 2.15 | 0.21 | -2.68 |
| IPI00297646 | Collagen alpha-1(I) chain precursor                | R.DLEVDTTLK.S                        | 2 | 2.59 | 0.09 | -2.57 |
| IPI00297646 | Collagen alpha-1(I) chain precursor                | R.DRDLEVDTTLK.S                      | 2 | 3.28 | 0.21 | -2.15 |
| IPI00297646 | Collagen alpha-1(I) chain precursor                | R.GETGPAGPAGVGPVGAR.G                | 2 | 4.24 | 0.41 | -5.56 |
| IPI00297646 | Collagen alpha-1(I) chain precursor                | R.GFSGLDGAKGDAGPAGPK.G               | 3 | 2.21 | 0.21 | -1.90 |
| IPI00297646 | Collagen alpha-1(I) chain precursor                | R.GPAGPQGPARGDKGETGEQGD.R            | 3 | 4.04 | 0.30 | -3.04 |
| IPI00297646 | Collagen alpha-1(I) chain precursor                | R.GQAGVM*GFPGPK.G                    | 2 | 2.29 | 0.13 |       |
| IPI00297646 | Collagen alpha-1(I) chain precursor                | R.ICVCDNGK.V                         | 1 | 2.14 | 0.25 | -2.33 |
| IPI00297646 | Collagen alpha-1(I) chain precursor                | R.ICVCDNGK.V                         | 2 | 2.37 | 0.19 | -1.22 |
| IPI00297646 | Collagen alpha-1(I) chain precursor                | R.YYRADDANVVR.D                      | 3 | 3.40 | 0.26 | -3.52 |
| IPI00297655 | Neurogenic locus notch homolog protein 2 precursor | R.DSQGELM*VYPYGEK.S                  | 2 | 3.49 | 0.25 |       |
| IPI00297655 | Neurogenic locus notch homolog protein 2 precursor | R.DTYECTCQVGFTGK.E                   | 2 | 4.07 | 0.38 | -3.47 |
| IPI00297655 | Neurogenic locus notch homolog protein 2 precursor | R.SLPGEQEVEVAGSK.V                   | 2 | 3.28 | 0.40 | -4.45 |
| IPI00297714 | Gamma-synuclein                                    | K.TVEEAENIAVTSGVVR.K                 | 2 | 4.21 | 0.36 | -1.98 |
| IPI00297714 | Gamma-synuclein                                    | K.TVEEAENIAVTSGVVR.K                 | 3 | 4.16 | 0.27 | -2.94 |
| IPI00297779 | T-complex protein 1 subunit beta                   | R.MLPTHIADNAGYDSADLVAQLR.A           | 3 | 2.91 | 0.15 | -2.16 |
| IPI00297779 | T-complex protein 1 subunit beta                   | R.QDLMNIAGTTLSSK.L                   | 2 | 2.67 | 0.11 |       |
| IPI00298237 | Isoform 1 of Tripeptidyl-peptidase 1 precursor     | K.WLLAAGAQK.C                        | 1 | 2.45 | 0.14 | -2.16 |
| IPI00298237 | Isoform 1 of Tripeptidyl-peptidase 1 precursor     | K.WLLAAGAQK.C                        | 2 | 2.53 | 0.17 | -2.22 |
| IPI00298237 | Isoform 1 of Tripeptidyl-peptidase 1 precursor     | K.YLTLENVADLVR.P                     | 2 | 4.09 | 0.45 | -3.92 |
| IPI00298237 | Isoform 1 of Tripeptidyl-peptidase 1 precursor     | K.YLTLENVADLVRPSPLTLHTVQK.W          | 2 | 4.39 | 0.58 | -4.30 |
| IPI00298237 | Isoform 1 of Tripeptidyl-peptidase 1 precursor     | K.YLTLENVADLVRPSPLTLHTVQK.W          | 3 | 5.35 | 0.37 | -4.75 |
| IPI00298237 | Isoform 1 of Tripeptidyl-peptidase 1 precursor     | K.YLTLENVADLVRPSPLTLHTVQK.W          | 4 | 3.39 | 0.29 | -3.58 |
| IPI00298237 | Isoform 1 of Tripeptidyl-peptidase 1 precursor     | R.ADPEEELSLSLQ                       | 2 | 3.96 | 0.39 | -6.58 |
| IPI00298237 | Isoform 1 of Tripeptidyl-peptidase 1 precursor     | R.AYPDVAALSDGYWVSNR.V                | 2 | 4.82 | 0.50 | -1.31 |
| IPI00298237 | Isoform 1 of Tripeptidyl-peptidase 1 precursor     | R.FPPTSSLR.Q                         | 2 | 2.16 | 0.08 | 0.19  |

|             |                                                                |                                           |   |      |      |       |
|-------------|----------------------------------------------------------------|-------------------------------------------|---|------|------|-------|
| IPI00298237 | Isoform 1 of Tripeptidyl-peptidase 1 precursor                 | R.GCHESCLDEEVEGQGFCSPGWDPVTGWGTPNFPALLK.T | 3 | 5.20 | 0.54 | -1.83 |
| IPI00298237 | Isoform 1 of Tripeptidyl-peptidase 1 precursor                 | R.GCHESCLDEEVEGQGFCSPGWDPVTGWGTPNFPALLK.T | 4 | 3.80 | 0.33 | -1.60 |
| IPI00298237 | Isoform 1 of Tripeptidyl-peptidase 1 precursor                 | R.ILSGRPPLGFLNPR.L                        | 2 | 2.82 | 0.16 | -2.60 |
| IPI00298237 | Isoform 1 of Tripeptidyl-peptidase 1 precursor                 | R.ILSGRPPLGFLNPR.L                        | 3 | 2.21 | 0.35 | -2.86 |
| IPI00298237 | Isoform 1 of Tripeptidyl-peptidase 1 precursor                 | R.LFGGNFAHQASVAR.V                        | 2 | 4.65 | 0.41 | -3.11 |
| IPI00298237 | Isoform 1 of Tripeptidyl-peptidase 1 precursor                 | R.LSELVQAVSDPSSPQYGK.Y                    | 2 | 5.46 | 0.58 | -4.11 |
| IPI00298237 | Isoform 1 of Tripeptidyl-peptidase 1 precursor                 | R.LSELVQAVSDPSSPQYGK.Y                    | 3 | 5.64 | 0.53 | -2.56 |
| IPI00298237 | Isoform 1 of Tripeptidyl-peptidase 1 precursor                 | R.LYQQHGAGLFDVTR.G                        | 2 | 4.21 | 0.46 | -3.33 |
| IPI00298237 | Isoform 1 of Tripeptidyl-peptidase 1 precursor                 | R.LYQQHGAGLFDVTR.G                        | 3 | 3.80 | 0.34 | -3.07 |
| IPI00298237 | Isoform 1 of Tripeptidyl-peptidase 1 precursor                 | R.PSYQEEAVTK.F                            | 2 | 3.30 | 0.41 | -4.52 |
| IPI00298237 | Isoform 1 of Tripeptidyl-peptidase 1 precursor                 | R.QAELLPLGAEFHYYVGGPTETHVVR.S             | 3 | 3.17 | 0.29 | -3.76 |
| IPI00298237 | Isoform 1 of Tripeptidyl-peptidase 1 precursor                 | R.QAELLPLGAEFHYYVGGPTETHVVR.S             | 4 | 4.12 | 0.33 | 0.67  |
| IPI00298237 | Isoform 1 of Tripeptidyl-peptidase 1 precursor                 | R.QRPEPQVTGTVGLHLGVTPSVIR.K               | 3 | 5.89 | 0.47 | -2.88 |
| IPI00298237 | Isoform 1 of Tripeptidyl-peptidase 1 precursor                 | R.QRPEPQVTGTVGLHLGVTPSVIR.K               | 4 | 3.83 | 0.41 | -2.86 |
| IPI00298237 | Isoform 1 of Tripeptidyl-peptidase 1 precursor                 | R.TLPPGWVSLGR.A                           | 1 | 1.67 | 0.09 | -3.22 |
| IPI00298237 | Isoform 1 of Tripeptidyl-peptidase 1 precursor                 | R.TLPPGWVSLGR.A                           | 2 | 1.45 | 0.16 | -1.59 |
| IPI00298237 | Isoform 1 of Tripeptidyl-peptidase 1 precursor                 | R.VNTELM*K.A                              | 2 | 2.47 | 0.22 | -3.14 |
| IPI00298237 | Isoform 1 of Tripeptidyl-peptidase 1 precursor                 | R.VPIPWVSGTSASTPVFGGILSLINEHR.I           | 3 | 4.79 | 0.54 | -4.11 |
| IPI00298258 | UNC13B protein                                                 | K.GLIWDTM*VGTVWIALK.T                     | 2 | 2.29 | 0.15 |       |
| IPI00298281 | Laminin subunit gamma-1 precursor                              | K.AFDITYVR.L                              | 1 | 1.96 | 0.23 | -3.37 |
| IPI00298281 | Laminin subunit gamma-1 precursor                              | K.AFDITYVR.L                              | 2 | 2.19 | 0.23 | -2.11 |
| IPI00298281 | Laminin subunit gamma-1 precursor                              | K.DVDQNLN*DR.L                            | 2 | 2.90 | 0.32 | -5.19 |
| IPI00298281 | Laminin subunit gamma-1 precursor                              | K.GRDTLQEANDILNLLKDFDRR.V                 | 4 | 3.23 | 0.27 | -0.91 |
| IPI00298281 | Laminin subunit gamma-1 precursor                              | K.KGRDTLQEANDILNLLKDFDRR.R                | 4 | 3.88 | 0.28 | -3.45 |
| IPI00298281 | Laminin subunit gamma-1 precursor                              | K.LKDYEDLREDM*R.G                         | 3 | 1.86 | 0.17 | -2.35 |
| IPI00298281 | Laminin subunit gamma-1 precursor                              | K.QLQEAKEKELKR.K                          | 2 | 2.22 | 0.26 | -3.08 |
| IPI00298281 | Laminin subunit gamma-1 precursor                              | K.SYYYAISDFAVGGR.C                        | 2 | 3.95 | 0.49 | -3.51 |
| IPI00298281 | Laminin subunit gamma-1 precursor                              | R.ATAESASECLPCDCNGR.S                     | 2 | 4.81 | 0.59 | -2.89 |
| IPI00298281 | Laminin subunit gamma-1 precursor                              | R.DTLQEANDILNLLKDFDRR.V                   | 3 | 2.89 | 0.05 | -3.41 |
| IPI00298281 | Laminin subunit gamma-1 precursor                              | R.EAQQALGSAAADATEAK.N                     | 2 | 5.74 | 0.57 | -2.48 |
| IPI00298281 | Laminin subunit gamma-1 precursor                              | R.EAQQALGSAAADATEAK.N                     | 3 | 4.05 | 0.43 | -1.64 |
| IPI00298281 | Laminin subunit gamma-1 precursor                              | R.KVSDLENEAK.K                            | 2 | 2.61 | 0.09 | 1.83  |
| IPI00298281 | Laminin subunit gamma-1 precursor                              | R.LSAEDLVLEGAGLR.V                        | 2 | 4.19 | 0.36 | -3.07 |
| IPI00298281 | Laminin subunit gamma-1 precursor                              | R.LSAEDLVLEGAGLR.V                        | 3 | 3.81 | 0.13 | -1.32 |
| IPI00298281 | Laminin subunit gamma-1 precursor                              | R.NTIEETGNLAEQAR.A                        | 2 | 4.69 | 0.38 | -4.14 |
| IPI00298281 | Laminin subunit gamma-1 precursor                              | R.SAGYLDVTLASAR.P                         | 2 | 4.81 | 0.44 | -4.92 |
| IPI00298281 | Laminin subunit gamma-1 precursor                              | R.VKLQELESLIANLGTGDEM*VTDQAFEDR.L         | 3 | 6.60 | 0.47 | -3.53 |
| IPI00298281 | Laminin subunit gamma-1 precursor                              | R.VSVPVLIAGGNSYSPSETTVK.Y                 | 2 | 4.30 | 0.56 | -4.47 |
| IPI00298281 | Laminin subunit gamma-1 precursor                              | R.YFIAPAK.F                               | 2 | 1.72 | 0.10 | -3.72 |
| IPI00298285 | Isoform 1 of Receptor tyrosine-protein kinase erbB-3 precursor | R.IYISANR.Q                               | 2 | 2.09 | 0.06 | -0.96 |
| IPI00298337 | cDNA FLJ77671                                                  | R.VDSPTMVRGENQVSPCQGR.R                   | 2 | 1.69 | 0.11 | -2.53 |

|             |                                                                        |                                       |   |      |      |       |
|-------------|------------------------------------------------------------------------|---------------------------------------|---|------|------|-------|
| IPI00298388 | Isoform 1 of Phosphoinositide-3-kinase-interacting protein 1 precursor | E.VQVFAPANALPAR.S                     | 2 | 3.16 | 0.32 | -0.90 |
| IPI00298388 | Isoform 1 of Phosphoinositide-3-kinase-interacting protein 1 precursor | G.SGGCFWDNGHLYREDQTSPAPGLR.C          | 3 | 5.01 | 0.51 | -3.33 |
| IPI00298388 | Isoform 1 of Phosphoinositide-3-kinase-interacting protein 1 precursor | P.ARSEAAAVQPVIGISQR.V                 | 2 | 5.92 | 0.45 | -3.85 |
| IPI00298388 | Isoform 1 of Phosphoinositide-3-kinase-interacting protein 1 precursor | R.EDQTSPAPGLR.C                       | 1 | 2.06 | 0.26 | -5.36 |
| IPI00298388 | Isoform 1 of Phosphoinositide-3-kinase-interacting protein 1 precursor | R.EDQTSPAPGLR.C                       | 2 | 3.45 | 0.31 | -3.41 |
| IPI00298388 | Isoform 1 of Phosphoinositide-3-kinase-interacting protein 1 precursor | R.GPWCYVSGEAGVPEK.R                   | 2 | 2.93 | 0.30 | -2.54 |
| IPI00298388 | Isoform 1 of Phosphoinositide-3-kinase-interacting protein 1 precursor | R.NPDEDPRGPWCYVSGEAGVPEK.R            | 2 | 2.27 | 0.19 | -3.22 |
| IPI00298388 | Isoform 1 of Phosphoinositide-3-kinase-interacting protein 1 precursor | R.NPDEDPRGPWCYVSGEAGVPEK.R            | 3 | 3.39 | 0.40 | -3.23 |
| IPI00298388 | Isoform 1 of Phosphoinositide-3-kinase-interacting protein 1 precursor | R.NPDEDPRGPWCYVSGEAGVPEKRPCEDLR.C     | 4 | 3.00 | 0.32 | -3.76 |
| IPI00298388 | Isoform 1 of Phosphoinositide-3-kinase-interacting protein 1 precursor | R.SEAAAVQPVIGI.S                      | 2 | 3.07 | 0.28 | -1.43 |
| IPI00298388 | Isoform 1 of Phosphoinositide-3-kinase-interacting protein 1 precursor | R.SEAAAVQPVIGISQ.R                    | 2 | 3.42 | 0.49 | -3.67 |
| IPI00298388 | Isoform 1 of Phosphoinositide-3-kinase-interacting protein 1 precursor | R.SEAAAVQPVIGISQR.V                   | 2 | 4.84 | 0.48 | -3.12 |
| IPI00298388 | Isoform 1 of Phosphoinositide-3-kinase-interacting protein 1 precursor | R.SEAAAVQPVIGISQR.V                   | 3 | 4.67 | 0.32 | -2.11 |
| IPI00298388 | Isoform 1 of Phosphoinositide-3-kinase-interacting protein 1 precursor | W.DNGHLYREDQTSPAPGLR.C                | 2 | 4.20 | 0.41 | -6.02 |
| IPI00298388 | Isoform 1 of Phosphoinositide-3-kinase-interacting protein 1 precursor | W.DNGHLYREDQTSPAPGLR.C                | 3 | 4.90 | 0.50 | -2.77 |
| IPI00298476 | Isoform 1 of Gremlin-1 precursor                                       | K.AQHNDSEQTQSPQQPSGR.N                | 3 | 3.08 | 0.26 | -2.75 |
| IPI00298476 | Isoform 1 of Gremlin-1 precursor                                       | K.GSQGAIPPPDKAQHNDSEQTQSPQQPSGR.N     | 4 | 2.70 | 0.16 | -5.04 |
| IPI00298497 | Fibrinogen beta chain precursor                                        | K.AHYGGFTVQNEANKYQISVVK.Y             | 2 | 6.10 | 0.36 |       |
| IPI00298497 | Fibrinogen beta chain precursor                                        | K.AHYGGFTVQNEANKYQISVVK.Y             | 3 | 4.79 | 0.55 |       |
| IPI00298497 | Fibrinogen beta chain precursor                                        | K.DNENVVNEYSSELEK.H                   | 2 | 4.92 | 0.34 |       |
| IPI00298497 | Fibrinogen beta chain precursor                                        | K.DNENVVNEYSSELEKHQLYIDETVNSNIPTNLR.V | 3 | 5.97 | 0.43 |       |
| IPI00298497 | Fibrinogen beta chain precursor                                        | K.EDGGGWYNR.C                         | 2 | 3.04 | 0.31 |       |
| IPI00298497 | Fibrinogen beta chain precursor                                        | K.GGETSEM*YLIQPDSSVKPYR.V             | 3 | 4.32 | 0.35 |       |
| IPI00298497 | Fibrinogen beta chain precursor                                        | K.HGTDDGVVWM*NWK.G                    | 2 | 3.78 | 0.42 |       |
| IPI00298497 | Fibrinogen beta chain precursor                                        | K.HQLYIDETVNSNIPTNLR.V                | 2 | 5.48 | 0.47 |       |
| IPI00298497 | Fibrinogen beta chain precursor                                        | K.IQKLESDVSAQM*EYCR.T                 | 2 | 5.23 | 0.46 |       |
| IPI00298497 | Fibrinogen beta chain precursor                                        | K.IQKLESDVSAQM*EYCR.T                 | 3 | 3.40 | 0.18 |       |

|             |                                 |                                              |   |      |      |       |
|-------------|---------------------------------|----------------------------------------------|---|------|------|-------|
| IPI00298497 | Fibrinogen beta chain precursor | K.LESDVSAQM*EYCR.T                           | 2 | 4.50 | 0.49 |       |
| IPI00298497 | Fibrinogen beta chain precursor | K.LESDVSAQMEYCR.T                            | 2 | 4.69 | 0.42 |       |
| IPI00298497 | Fibrinogen beta chain precursor | K.NYCGLPGEYWLGNDK.I                          | 2 | 3.79 | 0.28 |       |
| IPI00298497 | Fibrinogen beta chain precursor | K.NYCGLPGEYWLGNDKISQLTR.M                    | 2 | 3.89 | 0.43 |       |
| IPI00298497 | Fibrinogen beta chain precursor | K.QCSKEDGGGWYNR.C                            | 2 | 2.45 | 0.27 |       |
| IPI00298497 | Fibrinogen beta chain precursor | K.QGFGNVATNTDGK.N                            | 2 | 3.62 | 0.37 |       |
| IPI00298497 | Fibrinogen beta chain precursor | K.QGFGNVATNTDGKNYCGLPGEYWLGNDK.I             | 3 | 3.86 | 0.31 |       |
| IPI00298497 | Fibrinogen beta chain precursor | K.QVKDNENVVNEYSSELEKHQLYIDETVNSNIPTNLR.V     | 3 | 4.37 | 0.30 |       |
| IPI00298497 | Fibrinogen beta chain precursor | K.REEAPSLRPAPPISGGGYR.A                      | 3 | 4.00 | 0.36 |       |
| IPI00298497 | Fibrinogen beta chain precursor | K.YQISVVK.Y                                  | 1 | 2.25 | 0.12 |       |
| IPI00298497 | Fibrinogen beta chain precursor | R.EEAPSLRPAPPISGGGYR.A                       | 3 | 2.67 | 0.24 |       |
| IPI00298497 | Fibrinogen beta chain precursor | R.KAPDAGGCLHADPDLGVLCPGTCQLQEQALLQQRPIR.N    | 3 | 4.59 | 0.41 |       |
| IPI00298497 | Fibrinogen beta chain precursor | R.KGGETSEM*YLIQPDSSVKPYR.V                   | 3 | 5.48 | 0.27 |       |
| IPI00298497 | Fibrinogen beta chain precursor | R.KWDPYKQGFNVATNTDGK.N                       | 3 | 3.33 | 0.18 |       |
| IPI00298497 | Fibrinogen beta chain precursor | R.M*GPTELLIEMEDWK.G                          | 2 | 4.40 | 0.37 |       |
| IPI00298497 | Fibrinogen beta chain precursor | R.NSVDELNNNVEAVSQTSSSSFQYM*YLLK.D            | 3 | 5.98 | 0.43 |       |
| IPI00298497 | Fibrinogen beta chain precursor | R.NSVDELNNNVEAVSQTSSSSFQYMYLLK.D             | 3 | 5.43 | 0.42 |       |
| IPI00298497 | Fibrinogen beta chain precursor | R.QDGSVDFGR.K                                | 2 | 2.09 | 0.21 |       |
| IPI00298497 | Fibrinogen beta chain precursor | R.SKIQKLESDVSAQM*EYCR.T                      | 2 | 5.95 | 0.42 |       |
| IPI00298497 | Fibrinogen beta chain precursor | R.SKIQKLESDVSAQM*EYCR.T                      | 3 | 5.12 | 0.32 |       |
| IPI00298497 | Fibrinogen beta chain precursor | R.TPCTVSCNIPVVSQKECEEIIR.K                   | 2 | 4.91 | 0.50 |       |
| IPI00298497 | Fibrinogen beta chain precursor | R.TPCTVSCNIPVVSQKECEEIIR.K                   | 3 | 4.48 | 0.33 |       |
| IPI00298497 | Fibrinogen beta chain precursor | R.TPCTVSCNIPVVSQKECEEIIRK.G                  | 3 | 4.01 | 0.42 |       |
| IPI00298497 | Fibrinogen beta chain precursor | R.VYCDM*NTENGGWTVIQNR.Q                      | 2 | 5.45 | 0.35 |       |
| IPI00298497 | Fibrinogen beta chain precursor | R.VYCDM*NTENGGWTVIQNR.Q                      | 3 | 4.45 | 0.22 |       |
| IPI00298497 | Fibrinogen beta chain precursor | R.VYCDMNTENGGWTVIQNR.Q                       | 2 | 5.15 | 0.37 |       |
| IPI00298547 | Protein DJ-1                    | K.APLVLKD.-                                  | 1 | 1.66 | 0.10 | -1.11 |
| IPI00298547 | Protein DJ-1                    | K.DGLILTSR.G                                 | 2 | 2.67 | 0.15 | -3.45 |
| IPI00298547 | Protein DJ-1                    | K.EGPYDVVVLPGGNLGAQNLSESAAVK.E               | 3 | 3.59 | 0.30 | -5.28 |
| IPI00298547 | Protein DJ-1                    | K.EGPYDVVVLPGGNLGAQNLSESAAVKEILK.E           | 3 | 3.33 | 0.12 | -3.78 |
| IPI00298547 | Protein DJ-1                    | K.EILKEQENR.K                                | 2 | 2.35 | 0.07 | -2.97 |
| IPI00298547 | Protein DJ-1                    | K.GAEEM*ETVIPVDVM*R.R                        | 2 | 3.68 | 0.39 | -4.68 |
| IPI00298547 | Protein DJ-1                    | K.GAEEM*ETVIPVDVM*R.R                        | 3 | 2.59 | 0.12 | -2.71 |
| IPI00298547 | Protein DJ-1                    | K.VTTHPLAK.D                                 | 1 | 2.10 | 0.11 | -3.07 |
| IPI00298547 | Protein DJ-1                    | R.DVICPDASLEDAKKEGPYDVVVLPGGNLGAQNLSESAAVK.E | 4 | 4.92 | 0.30 | -4.29 |
| IPI00298547 | Protein DJ-1                    | R.GPGTSFEFALAIVEALNGK.E                      | 2 | 6.23 | 0.58 | -5.35 |
| IPI00298547 | Protein DJ-1                    | R.GPGTSFEFALAIVEALNGK.E                      | 3 | 3.59 | 0.32 | -3.22 |
| IPI00298547 | Protein DJ-1                    | R.GPGTSFEFALAIVEALNGKEVAAQVK.A               | 3 | 1.99 | 0.12 | -0.07 |
| IPI00298650 | ADAMTS-8 precursor              | R.GLSGSFLLDGEEFTIQPGAGGSLAQPHR.L             | 3 | 5.40 | 0.49 | -0.36 |
| IPI00298650 | ADAMTS-8 precursor              | R.KVSGSLTPTNYGYNDIVTIPAGATNIDVK.Q            | 3 | 3.59 | 0.27 | -3.35 |
| IPI00298650 | ADAMTS-8 precursor              | R.LQSRPLPEPLTVQLLTVPGEVFPPK.V                | 3 | 3.05 | 0.39 | -4.00 |



|             |                                                                 |                                           |   |      |      |       |
|-------------|-----------------------------------------------------------------|-------------------------------------------|---|------|------|-------|
| IPI00298702 | solute carrier family 39 (zinc transporter), member 6 isoform 1 | R.NVKDSVSASEVTSTVYNTVSEGETHFLETIETPRPGK.L | 4 | 3.23 | 0.26 | -4.56 |
| IPI00298738 | DNA-directed RNA polymerase, mitochondrial precursor            | R.GRTYPCPPHNLGSDVAR.A                     | 4 | 2.24 | 0.14 | -5.19 |
| IPI00298793 | Beta-mannosidase precursor                                      | K.GGEAVCLYEPPVSELLRR.C                    | 3 | 2.36 | 0.13 | -2.99 |
| IPI00298793 | Beta-mannosidase precursor                                      | K.GSPGLSFYFK.I                            | 2 | 2.12 | 0.27 | -1.61 |
| IPI00298793 | Beta-mannosidase precursor                                      | K.LPQSTDPLR.T                             | 2 | 2.98 | 0.24 | -3.31 |
| IPI00298793 | Beta-mannosidase precursor                                      | K.LQTQQTYSELQPGKR.I                       | 2 | 4.27 | 0.42 | -4.63 |
| IPI00298793 | Beta-mannosidase precursor                                      | K.QM*LYQAGLHFK.L                          | 3 | 2.03 | 0.14 | -4.12 |
| IPI00298793 | Beta-mannosidase precursor                                      | K.VNLILEGVDTVSK.I                         | 2 | 5.20 | 0.43 | -4.46 |
| IPI00298793 | Beta-mannosidase precursor                                      | R.DVNSIELR.F                              | 2 | 3.03 | 0.17 | -2.03 |
| IPI00298793 | Beta-mannosidase precursor                                      | R.FASEYGYQSWPSFSTLEK.V                    | 2 | 3.78 | 0.35 | -4.77 |
| IPI00298793 | Beta-mannosidase precursor                                      | R.FNDLNYR.W                               | 1 | 2.02 | 0.10 | -2.08 |
| IPI00298793 | Beta-mannosidase precursor                                      | R.FNDLNYR.W                               | 2 | 2.70 | 0.14 | -2.25 |
| IPI00298793 | Beta-mannosidase precursor                                      | R.FQSAVLYAAQQSK.A                         | 2 | 4.49 | 0.40 | -3.56 |
| IPI00298793 | Beta-mannosidase precursor                                      | R.IEAYNICHNLNYFTFSPYDK.S                  | 3 | 3.94 | 0.22 | -0.57 |
| IPI00298793 | Beta-mannosidase precursor                                      | R.TILFYWPWEPTSK.N                         | 2 | 3.43 | 0.34 | -3.82 |
| IPI00298793 | Beta-mannosidase precursor                                      | R.TILFYWPWEPTSKNELEQSFHVTSLTDIY.-         | 3 | 2.49 | 0.05 | -2.61 |
| IPI00298793 | Beta-mannosidase precursor                                      | R.TVELIEEPIKGSPGLSFYFK.I                  | 3 | 3.96 | 0.45 | -6.07 |
| IPI00298793 | Beta-mannosidase precursor                                      | R.YSFDITNVVR.D                            | 2 | 3.77 | 0.39 | -3.61 |
| IPI00298793 | Beta-mannosidase precursor                                      | R.YSFDITNVVRDVNSIELR.F                    | 3 | 4.02 | 0.41 | -1.95 |
| IPI00298828 | Beta-2-glycoprotein 1 precursor                                 | A.GRTCPKPDLLPFSTVPLK.T                    | 3 | 4.40 | 0.31 | -3.97 |
| IPI00298828 | Beta-2-glycoprotein 1 precursor                                 | C.PFAGILENGAVR.Y                          | 2 | 3.95 | 0.33 | -3.27 |
| IPI00298828 | Beta-2-glycoprotein 1 precursor                                 | C.PFPSRPDNGFVNYPKPTLYYK.D                 | 3 | 3.88 | 0.17 | -3.79 |
| IPI00298828 | Beta-2-glycoprotein 1 precursor                                 | K.ATFGCHDGYSLDGPEEIECTK.L                 | 2 | 4.88 | 0.54 | -4.05 |
| IPI00298828 | Beta-2-glycoprotein 1 precursor                                 | K.ATFGCHDGYSLDGPEEIECTK.L                 | 3 | 5.17 | 0.40 | -4.43 |
| IPI00298828 | Beta-2-glycoprotein 1 precursor                                 | K.ATVVYQGER.V                             | 1 | 2.18 | 0.24 | -3.28 |
| IPI00298828 | Beta-2-glycoprotein 1 precursor                                 | K.ATVVYQGER.V                             | 2 | 3.16 | 0.38 | -2.13 |
| IPI00298828 | Beta-2-glycoprotein 1 precursor                                 | K.CPFPSRPDNGFVNYPKPTLYYK.D                | 3 | 5.39 | 0.43 | -3.92 |
| IPI00298828 | Beta-2-glycoprotein 1 precursor                                 | K.CPFPSRPDNGFVNYPKPTLYYKDK.A              | 3 | 5.74 | 0.41 |       |
| IPI00298828 | Beta-2-glycoprotein 1 precursor                                 | K.CSYTEDAQCIDGTIEVPK.C                    | 2 | 6.29 | 0.57 | -4.66 |
| IPI00298828 | Beta-2-glycoprotein 1 precursor                                 | K.CSYTEDAQCIDGTIEVPK.C                    | 3 | 5.66 | 0.48 | -4.68 |
| IPI00298828 | Beta-2-glycoprotein 1 precursor                                 | K.CSYTEDAQCIDGTIEVPKCFK.E                 | 3 | 2.59 | 0.24 |       |
| IPI00298828 | Beta-2-glycoprotein 1 precursor                                 | K.CTEEGKWSPPELPCAPICPPPSIPTFATLR.V        | 2 | 2.07 | 0.45 | -3.51 |
| IPI00298828 | Beta-2-glycoprotein 1 precursor                                 | K.CTEEGKWSPPELPCAPICPPPSIPTFATLR.V        | 3 | 6.36 | 0.57 | -4.90 |
| IPI00298828 | Beta-2-glycoprotein 1 precursor                                 | K.CTEEGKWSPPELPCAPICPPPSIPTFATLR.V        | 4 | 3.24 | 0.31 | -3.99 |
| IPI00298828 | Beta-2-glycoprotein 1 precursor                                 | K.DKATFGCHDGYSLDGPEEIECTK.L               | 3 | 5.82 | 0.36 |       |
| IPI00298828 | Beta-2-glycoprotein 1 precursor                                 | K.FICPLTGLWPINTLK.C                       | 2 | 4.98 | 0.49 | -5.50 |
| IPI00298828 | Beta-2-glycoprotein 1 precursor                                 | K.FICPLTGLWPINTLK.C                       | 3 | 3.69 | 0.21 | -2.90 |
| IPI00298828 | Beta-2-glycoprotein 1 precursor                                 | K.KATVVYQGER.V                            | 1 | 2.74 | 0.31 | -4.39 |
| IPI00298828 | Beta-2-glycoprotein 1 precursor                                 | K.KATVVYQGER.V                            | 2 | 3.46 | 0.37 | -3.65 |
| IPI00298828 | Beta-2-glycoprotein 1 precursor                                 | K.KCSYTEDAQCIDGTIEVPK.C                   | 2 | 5.04 | 0.56 | -3.78 |

|             |                                 |                                           |   |      |      |       |
|-------------|---------------------------------|-------------------------------------------|---|------|------|-------|
| IPI00298828 | Beta-2-glycoprotein 1 precursor | K.KCSYTEDAQCIDGTIEVPK.C                   | 3 | 3.63 | 0.31 | -2.72 |
| IPI00298828 | Beta-2-glycoprotein 1 precursor | K.NGM*LHGDKVSFFCK.N                       | 2 | 3.74 | 0.42 |       |
| IPI00298828 | Beta-2-glycoprotein 1 precursor | K.NGM*LHGDKVSFFCK.N                       | 3 | 2.68 | 0.25 |       |
| IPI00298828 | Beta-2-glycoprotein 1 precursor | K.TFYEPGEEIT.Y                            | 1 | 2.27 | 0.23 | -2.13 |
| IPI00298828 | Beta-2-glycoprotein 1 precursor | K.TFYEPGEEITYSCKPGYVSR.G                  | 2 | 5.11 | 0.55 | -2.76 |
| IPI00298828 | Beta-2-glycoprotein 1 precursor | K.TFYEPGEEITYSCKPGYVSR.G                  | 3 | 2.31 | 0.20 |       |
| IPI00298828 | Beta-2-glycoprotein 1 precursor | K.WSPELPVCAPICPPPSIPTFATLR.V              | 2 | 3.89 | 0.56 | -4.70 |
| IPI00298828 | Beta-2-glycoprotein 1 precursor | K.WSPELPVCAPICPPPSIPTFATLR.V              | 3 | 4.91 | 0.51 | -5.35 |
| IPI00298828 | Beta-2-glycoprotein 1 precursor | P.FPSRPDNGFVNYPKPTLYYKDK.A                | 3 | 4.96 | 0.45 | -1.09 |
| IPI00298828 | Beta-2-glycoprotein 1 precursor | R.KFICPLTGLWPINTLK.C                      | 2 | 4.19 | 0.45 | -4.37 |
| IPI00298828 | Beta-2-glycoprotein 1 precursor | R.KFICPLTGLWPINTLK.C                      | 3 | 3.01 | 0.23 | -5.46 |
| IPI00298828 | Beta-2-glycoprotein 1 precursor | R.TCPKPDDLFPSTVVPLK.T                     | 2 | 3.68 | 0.24 |       |
| IPI00298828 | Beta-2-glycoprotein 1 precursor | R.TCPKPDDLFPSTVVPLK.T                     | 3 | 3.20 | 0.26 | -4.30 |
| IPI00298828 | Beta-2-glycoprotein 1 precursor | R.TCPKPDDLFPSTVVPLKTFYEPGEEITYSCKPGYVSR.G | 4 | 3.57 | 0.15 | -4.63 |
| IPI00298828 | Beta-2-glycoprotein 1 precursor | R.VCPFAGILENGAVR.Y                        | 1 | 3.21 | 0.32 | -1.79 |
| IPI00298828 | Beta-2-glycoprotein 1 precursor | R.VCPFAGILENGAVR.Y                        | 2 | 4.60 | 0.38 | -6.17 |
| IPI00298828 | Beta-2-glycoprotein 1 precursor | R.VCPFAGILENGAVR.Y                        | 3 | 4.91 | 0.32 | -2.26 |
| IPI00298828 | Beta-2-glycoprotein 1 precursor | R.YTTFEYPNTISFSCNTGFYLNADSAK.C            | 2 | 4.10 | 0.53 | -3.00 |
| IPI00298828 | Beta-2-glycoprotein 1 precursor | R.YTTFEYPNTISFSCNTGFYLNADSAK.C            | 3 | 4.81 | 0.53 | -5.56 |
| IPI00298828 | Beta-2-glycoprotein 1 precursor | W.SPELPVCAPICPPPSIPTFATLR.V               | 2 | 4.23 | 0.56 | -2.35 |
| IPI00298971 | Vitronectin precursor           | I.YISGM*APRPSLAK.K                        | 2 | 3.04 | 0.33 | -1.10 |
| IPI00298971 | Vitronectin precursor           | K.AVRPGYPK.L                              | 2 | 2.36 | 0.09 | -3.84 |
| IPI00298971 | Vitronectin precursor           | K.CQCDELCSYYQSCCTDYTAECKPQVTR.G           | 3 | 5.55 | 0.69 | -3.02 |
| IPI00298971 | Vitronectin precursor           | K.LIRDVWGIEGPIDAAFTR.I                    | 2 | 4.08 | 0.53 | -4.12 |
| IPI00298971 | Vitronectin precursor           | K.LIRDVWGIEGPIDAAFTR.I                    | 3 | 5.12 | 0.38 | -2.96 |
| IPI00298971 | Vitronectin precursor           | R.CTEGFNVDK.K                             | 2 | 2.29 | 0.20 | -0.60 |
| IPI00298971 | Vitronectin precursor           | R.CTEGFNVDKK.C                            | 2 | 2.56 | 0.10 | -0.73 |
| IPI00298971 | Vitronectin precursor           | R.CTEGFNVDKK.C                            | 3 | 3.44 | 0.10 |       |
| IPI00298971 | Vitronectin precursor           | R.DVWGIEGPIDAAFTR.I                       | 1 | 1.28 | 0.26 | -5.04 |
| IPI00298971 | Vitronectin precursor           | R.DVWGIEGPIDAAFTR.I                       | 2 | 4.74 | 0.47 | -5.58 |
| IPI00298971 | Vitronectin precursor           | R.DVWGIEGPIDAAFTR.I                       | 3 | 4.35 | 0.41 | -2.28 |
| IPI00298971 | Vitronectin precursor           | R.DWHGVPGQVDAAM*AGR.I                     | 2 | 3.81 | 0.46 | -3.30 |
| IPI00298971 | Vitronectin precursor           | R.DWHGVPGQVDAAM*AGR.I                     | 3 | 5.40 | 0.38 | -2.26 |
| IPI00298971 | Vitronectin precursor           | R.DWHGVPGQVDAAMAGR.I                      | 3 | 4.19 | 0.25 |       |
| IPI00298971 | Vitronectin precursor           | R.FEDGVLPDYPR.N                           | 1 | 2.44 | 0.33 | -4.04 |
| IPI00298971 | Vitronectin precursor           | R.FEDGVLPDYPR.N                           | 2 | 4.65 | 0.35 | -5.06 |
| IPI00298971 | Vitronectin precursor           | R.GQYCYELDEK.A                            | 1 | 2.65 | 0.14 | -3.25 |
| IPI00298971 | Vitronectin precursor           | R.GQYCYELDEK.A                            | 2 | 3.37 | 0.46 | -3.37 |
| IPI00298971 | Vitronectin precursor           | R.IYISGM*APR.P                            | 2 | 3.13 | 0.23 | -0.45 |
| IPI00298971 | Vitronectin precursor           | R.IYISGM*APRPSLAK.K                       | 2 | 4.02 | 0.38 | -3.22 |
| IPI00298971 | Vitronectin precursor           | R.M*DWLVPATCEPIQSVFFFSGDK.Y               | 2 | 4.04 | 0.47 | 1.48  |
| IPI00298971 | Vitronectin precursor           | R.M*DWLVPATCEPIQSVFFFSGDKYYR.V            | 3 | 2.38 | 0.31 | -2.99 |

|             |                              |                                         |   |      |      |       |
|-------------|------------------------------|-----------------------------------------|---|------|------|-------|
| IPI00298971 | Vitronectin precursor        | R.RVDTVDPYPYPR.S                        | 1 | 1.72 | 0.25 | -4.60 |
| IPI00298971 | Vitronectin precursor        | R.RVDTVDPYPYPR.S                        | 3 | 2.64 | 0.20 | -3.59 |
| IPI00298971 | Vitronectin precursor        | R.SIAQYWLGCAPAGH.L                      | 2 | 3.53 | 0.45 | -4.32 |
| IPI00298971 | Vitronectin precursor        | R.SIAQYWLGCAPAGHL.-                     | 2 | 4.55 | 0.51 | -4.58 |
| IPI00298971 | Vitronectin precursor        | R.SIAQYWLGCAPAGHL.-                     | 3 | 4.47 | 0.29 | -3.92 |
| IPI00298971 | Vitronectin precursor        | R.TSAGTRQPQFISR.D                       | 2 | 3.52 | 0.25 | -4.19 |
| IPI00298971 | Vitronectin precursor        | R.TSAGTRQPQFISR.D                       | 3 | 2.49 | 0.34 | -2.51 |
| IPI00298971 | Vitronectin precursor        | R.VDTVDPYPYPR.S                         | 2 | 2.70 | 0.18 | -1.96 |
| IPI00298971 | Vitronectin precursor        | W.GIEGPIDAAFTR.I                        | 1 | 2.13 | 0.34 | -3.82 |
| IPI00298971 | Vitronectin precursor        | W.GIEGPIDAAFTR.I                        | 2 | 3.69 | 0.44 | -4.27 |
| IPI00298994 | Talin-1                      | D.PEDPTVIAENELLGAAAAIEAAAK.K            | 3 | 4.56 | 0.44 | -3.32 |
| IPI00298994 | Talin-1                      | K.AAAFEEQENETVVVK.E                     | 2 | 5.17 | 0.36 | -3.21 |
| IPI00298994 | Talin-1                      | K.AIAVTVQEMVTK.S                        | 2 | 3.20 | 0.44 | -3.61 |
| IPI00298994 | Talin-1                      | K.AVASAAAAALVLK.A                       | 2 | 3.33 | 0.32 | -2.86 |
| IPI00298994 | Talin-1                      | K.EADESLNFEEQILEAAK.S                   | 2 | 5.35 | 0.43 | -4.24 |
| IPI00298994 | Talin-1                      | K.LAQAAQSSVATITR.L                      | 2 | 4.54 | 0.45 | -4.51 |
| IPI00298994 | Talin-1                      | K.PAAVAAENEEIGSHIK.H                    | 2 | 4.23 | 0.52 | -3.38 |
| IPI00298994 | Talin-1                      | K.PAAVAAENEEIGSHIK.H                    | 3 | 5.26 | 0.54 | -2.17 |
| IPI00298994 | Talin-1                      | K.VLVQNAAGSQEK.L                        | 2 | 2.83 | 0.06 | -3.82 |
| IPI00298994 | Talin-1                      | R.FGQDFSTFLEAGVEMAGQAPSQEDR.A           | 2 | 4.44 | 0.47 | -3.76 |
| IPI00298994 | Talin-1                      | R.FGQDFSTFLEAGVEMAGQAPSQEDR.A           | 3 | 4.33 | 0.36 | -4.20 |
| IPI00298994 | Talin-1                      | R.GVAALTSDPAVQAIVLDTASDVLDKASSLIEEAKK.A | 4 | 3.02 | 0.11 | -3.47 |
| IPI00299024 | Brain acid soluble protein 1 | A.EGAATEEEGTPKESEPQAAAEPAEAK.E          | 3 | 5.40 | 0.44 | -4.42 |
| IPI00299024 | Brain acid soluble protein 1 | E.GAATEEEGTPKESEPQAAAEPAEAK.E           | 3 | 4.88 | 0.48 | -1.57 |
| IPI00299024 | Brain acid soluble protein 1 | K.AAEAAAAPAESAAPAAGEEPSKEEGEPK.K        | 2 | 4.56 | 0.48 | -2.84 |
| IPI00299024 | Brain acid soluble protein 1 | K.AEGAATEEEGTPKESEPQAAAEPAEAK.E         | 3 | 5.31 | 0.52 | -3.94 |
| IPI00299024 | Brain acid soluble protein 1 | K.AEPPKAPEQEQAAPGPAAGGEAPK.A            | 2 | 3.95 | 0.47 | -3.06 |
| IPI00299024 | Brain acid soluble protein 1 | K.AEPPKAPEQEQAAPGPAAGGEAPK.A            | 3 | 4.29 | 0.36 | -3.15 |
| IPI00299024 | Brain acid soluble protein 1 | K.AEPPKAPEQEQAAPGPAAGGEAPK.A            | 4 | 2.82 | 0.21 | -1.95 |
| IPI00299024 | Brain acid soluble protein 1 | K.AEPPKAPEQEQAAPGPAAGGEAPKA.A           | 3 | 4.79 | 0.47 | -2.36 |
| IPI00299024 | Brain acid soluble protein 1 | K.AQGPAASAEPPK.V                        | 2 | 3.37 | 0.44 | -1.85 |
| IPI00299024 | Brain acid soluble protein 1 | K.AQGPAASAEPPKVEAPAANSQTVTVKE.-         | 3 | 6.64 | 0.54 | -3.62 |
| IPI00299024 | Brain acid soluble protein 1 | K.DKKAEGAATEEEGTPKESEPQAAAEPAEAK.E      | 4 | 3.88 | 0.35 | -3.80 |
| IPI00299024 | Brain acid soluble protein 1 | K.EEAPKAPEKTEGAAEAK.A                   | 3 | 2.93 | 0.18 | -3.31 |
| IPI00299024 | Brain acid soluble protein 1 | K.ESEPQAAAEPAEAK.E                      | 2 | 3.56 | 0.32 | -3.84 |
| IPI00299024 | Brain acid soluble protein 1 | K.ETPAATEAPSSTPK.A                      | 1 | 1.85 | 0.15 | -1.33 |
| IPI00299024 | Brain acid soluble protein 1 | K.ETPAATEAPSSTPK.A                      | 2 | 3.63 | 0.48 | -3.76 |
| IPI00299024 | Brain acid soluble protein 1 | K.ETPAATEAPSSTPKA.Q                     | 2 | 3.59 | 0.54 | -4.17 |
| IPI00299024 | Brain acid soluble protein 1 | K.KTEAPAAPAAQETK.S                      | 2 | 4.66 | 0.38 | -4.22 |
| IPI00299024 | Brain acid soluble protein 1 | K.KTEAPAAPAAQETK.S                      | 3 | 3.09 | 0.24 | -3.02 |
| IPI00299024 | Brain acid soluble protein 1 | K.SDGAPASDSKPGSSEAAPSSK.E               | 2 | 4.54 | 0.52 | -4.68 |
| IPI00299024 | Brain acid soluble protein 1 | K.SDGAPASDSKPGSSEAAPSSK.E               | 3 | 3.59 | 0.31 | -3.62 |

|             |                                                                      |                                         |   |      |      |       |
|-------------|----------------------------------------------------------------------|-----------------------------------------|---|------|------|-------|
| IPI00299024 | Brain acid soluble protein 1                                         | K.SDGAPASDSKPGSSEAAPSSKETPAATEAPSSTPK.A | 4 | 3.37 | 0.28 | -2.14 |
| IPI00299024 | Brain acid soluble protein 1                                         | K.TEAPAAPAAQETK.S                       | 2 | 3.22 | 0.42 | -3.41 |
| IPI00299059 | Isoform 2 of Neural cell adhesion molecule L1-like protein precursor | A.IEIPSSVQQVPTIIK.Q                     | 1 | 2.58 | 0.32 | -3.22 |
| IPI00299059 | Isoform 2 of Neural cell adhesion molecule L1-like protein precursor | A.IEIPSSVQQVPTIIK.Q                     | 2 | 4.57 | 0.41 | -3.82 |
| IPI00299059 | Isoform 2 of Neural cell adhesion molecule L1-like protein precursor | A.IEIPSSVQQVPTIIK.Q                     | 3 | 5.36 | 0.35 | -3.07 |
| IPI00299059 | Isoform 2 of Neural cell adhesion molecule L1-like protein precursor | C.TASNFLGTATHDFHVIVEEPPR.W              | 3 | 4.78 | 0.49 | -6.62 |
| IPI00299059 | Isoform 2 of Neural cell adhesion molecule L1-like protein precursor | F.AGDVVFPR.E                            | 2 | 3.30 | 0.23 | -1.47 |
| IPI00299059 | Isoform 2 of Neural cell adhesion molecule L1-like protein precursor | I.ENVSYQDKGNYSR.C                       | 2 | 3.08 | 0.35 | -3.51 |
| IPI00299059 | Isoform 2 of Neural cell adhesion molecule L1-like protein precursor | I.PSSVQQVPTIIK.Q                        | 2 | 3.78 | 0.29 | -2.47 |
| IPI00299059 | Isoform 2 of Neural cell adhesion molecule L1-like protein precursor | K.DGEAFEINGTEDGR.I                      | 2 | 5.08 | 0.51 | -3.06 |
| IPI00299059 | Isoform 2 of Neural cell adhesion molecule L1-like protein precursor | K.DGENYATVVGYS AFLHCEFFASPEAVVSWQK.V    | 3 | 5.81 | 0.53 | -3.43 |
| IPI00299059 | Isoform 2 of Neural cell adhesion molecule L1-like protein precursor | K.DGNPFYFTDHR.I                         | 1 | 2.37 | 0.22 | -1.95 |
| IPI00299059 | Isoform 2 of Neural cell adhesion molecule L1-like protein precursor | K.DGNPFYFTDHR.I                         | 2 | 3.28 | 0.40 | -3.15 |
| IPI00299059 | Isoform 2 of Neural cell adhesion molecule L1-like protein precursor | K.DGNPFYFTDHR.I                         | 3 | 1.71 | 0.11 | -0.62 |
| IPI00299059 | Isoform 2 of Neural cell adhesion molecule L1-like protein precursor | K.DSRNDYCCFAAFPR.L                      | 2 | 3.30 | 0.29 | -1.24 |
| IPI00299059 | Isoform 2 of Neural cell adhesion molecule L1-like protein precursor | K.DSRNDYCCFAAFPR.L                      | 3 | 3.52 | 0.43 | -2.05 |
| IPI00299059 | Isoform 2 of Neural cell adhesion molecule L1-like protein precursor | K.EKIDPLEVEEGD.P                        | 2 | 3.66 | 0.30 | -2.92 |
| IPI00299059 | Isoform 2 of Neural cell adhesion molecule L1-like protein precursor | K.EKIDPLEVEEGDPIVLP CNPPK.G             | 2 | 4.85 | 0.42 | -3.47 |
| IPI00299059 | Isoform 2 of Neural cell adhesion molecule L1-like protein precursor | K.EKIDPLEVEEGDPIVLP CNPPK.G             | 3 | 5.69 | 0.45 | -3.96 |
| IPI00299059 | Isoform 2 of Neural cell adhesion molecule L1-like protein precursor | K.EKIDPLEVEEGDPIVLP CNPPK.G             | 4 | 3.40 | 0.26 | -2.07 |
| IPI00299059 | Isoform 2 of Neural cell adhesion molecule L1-like protein precursor | K.EM*IIKWEPLK.S                         | 2 | 3.10 | 0.21 | -2.37 |
| IPI00299059 | Isoform 2 of Neural cell adhesion molecule L1-like protein precursor | K.EM*IIKWEPLK.S                         | 3 | 2.93 | 0.18 | -1.91 |

|             |                                                                      |                               |   |      |      |       |
|-------------|----------------------------------------------------------------------|-------------------------------|---|------|------|-------|
| IPI00299059 | Isoform 2 of Neural cell adhesion molecule L1-like protein precursor | K.EM*IIKWEPLKSM*EQNGPGLEYR.V  | 4 | 2.71 | 0.12 | -2.75 |
| IPI00299059 | Isoform 2 of Neural cell adhesion molecule L1-like protein precursor | K.GAGPESEPYIFQTPEGVPEQPTFLK.V | 2 | 5.03 | 0.56 | -5.30 |
| IPI00299059 | Isoform 2 of Neural cell adhesion molecule L1-like protein precursor | K.GAGPESEPYIFQTPEGVPEQPTFLK.V | 3 | 5.61 | 0.46 | -5.25 |
| IPI00299059 | Isoform 2 of Neural cell adhesion molecule L1-like protein precursor | K.GDLYFANVEEK.D               | 1 | 2.42 | 0.39 | -3.98 |
| IPI00299059 | Isoform 2 of Neural cell adhesion molecule L1-like protein precursor | K.GDLYFANVEEK.D               | 2 | 3.87 | 0.37 | -4.03 |
| IPI00299059 | Isoform 2 of Neural cell adhesion molecule L1-like protein precursor | K.GDLYFANVEEKDS.R             | 2 | 3.05 | 0.29 | -0.73 |
| IPI00299059 | Isoform 2 of Neural cell adhesion molecule L1-like protein precursor | K.GDLYFANVEEKDSR.N            | 2 | 4.06 | 0.44 | -2.35 |
| IPI00299059 | Isoform 2 of Neural cell adhesion molecule L1-like protein precursor | K.GDLYFANVEEKDSR.N            | 3 | 3.21 | 0.37 | -1.02 |
| IPI00299059 | Isoform 2 of Neural cell adhesion molecule L1-like protein precursor | K.GDLYFANVEEKDSRNDYCCFAAFPR.L | 3 | 3.20 | 0.20 | -0.61 |
| IPI00299059 | Isoform 2 of Neural cell adhesion molecule L1-like protein precursor | K.GEILLLECFEAELPTPQVDWNK.I    | 2 | 5.02 | 0.51 | -6.79 |
| IPI00299059 | Isoform 2 of Neural cell adhesion molecule L1-like protein precursor | K.GEILLLECFEAELPTPQVDWNK.I    | 3 | 3.49 | 0.25 | -5.04 |
| IPI00299059 | Isoform 2 of Neural cell adhesion molecule L1-like protein precursor | K.GLPPLHIYWM*NIELEHIEQDER.V   | 3 | 3.83 | 0.39 | -3.33 |
| IPI00299059 | Isoform 2 of Neural cell adhesion molecule L1-like protein precursor | K.GNPEPTFSWTK.D               | 1 | 2.14 | 0.28 | -3.00 |
| IPI00299059 | Isoform 2 of Neural cell adhesion molecule L1-like protein precursor | K.GNPEPTFSWTK.D               | 2 | 2.14 | 0.32 | -3.82 |
| IPI00299059 | Isoform 2 of Neural cell adhesion molecule L1-like protein precursor | K.GYQINWWK.T                  | 2 | 2.65 | 0.25 | -1.55 |
| IPI00299059 | Isoform 2 of Neural cell adhesion molecule L1-like protein precursor | K.IDPLEVEEGDPIVLPNPPK.G       | 2 | 5.17 | 0.46 | -5.35 |
| IPI00299059 | Isoform 2 of Neural cell adhesion molecule L1-like protein precursor | K.IDPLEVEEGDPIVLPNPPK.G       | 3 | 5.09 | 0.37 | -5.38 |
| IPI00299059 | Isoform 2 of Neural cell adhesion molecule L1-like protein precursor | K.IENVSQDK.G                  | 1 | 2.64 | 0.27 | -3.25 |
| IPI00299059 | Isoform 2 of Neural cell adhesion molecule L1-like protein precursor | K.IENVSQDK.G                  | 2 | 3.04 | 0.20 | -6.51 |
| IPI00299059 | Isoform 2 of Neural cell adhesion molecule L1-like protein precursor | K.IENVSQDKGNYSR.C             | 2 | 4.39 | 0.52 | -3.17 |
| IPI00299059 | Isoform 2 of Neural cell adhesion molecule L1-like protein precursor | K.IENVSQDKGNYSR.C             | 3 | 2.29 | 0.16 | -2.12 |

|             |                                                                      |                                            |   |      |      |       |
|-------------|----------------------------------------------------------------------|--------------------------------------------|---|------|------|-------|
| IPI00299059 | Isoform 2 of Neural cell adhesion molecule L1-like protein precursor | K.IGGDLPK.G                                | 1 | 2.06 | 0.12 | -2.35 |
| IPI00299059 | Isoform 2 of Neural cell adhesion molecule L1-like protein precursor | K.ISGVNLTQK.T                              | 1 | 2.19 | 0.11 | -3.21 |
| IPI00299059 | Isoform 2 of Neural cell adhesion molecule L1-like protein precursor | K.ISGVNLTQK.T                              | 2 | 3.03 | 0.30 | -2.32 |
| IPI00299059 | Isoform 2 of Neural cell adhesion molecule L1-like protein precursor | K.KPQSAVYSTGSNGILLCEAEGEPQPTIK.W           | 3 | 3.36 | 0.37 | -4.13 |
| IPI00299059 | Isoform 2 of Neural cell adhesion molecule L1-like protein precursor | K.KTTVILPLAPFVR.Y                          | 1 | 3.41 | 0.42 | -3.83 |
| IPI00299059 | Isoform 2 of Neural cell adhesion molecule L1-like protein precursor | K.KTTVILPLAPFVR.Y                          | 2 | 3.92 | 0.36 | -5.09 |
| IPI00299059 | Isoform 2 of Neural cell adhesion molecule L1-like protein precursor | K.KTTVILPLAPFVR.Y                          | 3 | 3.50 | 0.30 | -3.12 |
| IPI00299059 | Isoform 2 of Neural cell adhesion molecule L1-like protein precursor | K.LGIAM*SEEIEFIVPSVPK.F                    | 2 | 3.11 | 0.24 | -3.26 |
| IPI00299059 | Isoform 2 of Neural cell adhesion molecule L1-like protein precursor | K.LGIAM*SEEIEFIVPSVPKFKP.E                 | 2 | 4.50 | 0.47 | -3.09 |
| IPI00299059 | Isoform 2 of Neural cell adhesion molecule L1-like protein precursor | K.LGIAM*SEEIEFIVPSVPKFKP.E                 | 3 | 5.36 | 0.47 | -7.75 |
| IPI00299059 | Isoform 2 of Neural cell adhesion molecule L1-like protein precursor | K.LLLPPTESGSESSITLK.G                      | 2 | 2.74 | 0.47 | -6.14 |
| IPI00299059 | Isoform 2 of Neural cell adhesion molecule L1-like protein precursor | K.LLLPPTESGSESSITLK.G                      | 3 | 5.35 | 0.54 | -4.00 |
| IPI00299059 | Isoform 2 of Neural cell adhesion molecule L1-like protein precursor | K.LLLPPTESGSESSITLKGEILLLECFEAELPTQVDWNK.I | 4 | 3.33 | 0.19 | -1.73 |
| IPI00299059 | Isoform 2 of Neural cell adhesion molecule L1-like protein precursor | K.SM*EQNGPGLEYR.V                          | 2 | 3.98 | 0.45 | -3.35 |
| IPI00299059 | Isoform 2 of Neural cell adhesion molecule L1-like protein precursor | K.TAVTANLDIR.N                             | 1 | 2.24 | 0.19 | -3.68 |
| IPI00299059 | Isoform 2 of Neural cell adhesion molecule L1-like protein precursor | K.TAVTANLDIR.N                             | 2 | 3.58 | 0.33 | -4.21 |
| IPI00299059 | Isoform 2 of Neural cell adhesion molecule L1-like protein precursor | K.THPVEVFEPGAEH.I                          | 2 | 3.54 | 0.47 | -3.64 |
| IPI00299059 | Isoform 2 of Neural cell adhesion molecule L1-like protein precursor | K.THPVEVFEPGAEH.I                          | 3 | 3.54 | 0.29 | -2.49 |
| IPI00299059 | Isoform 2 of Neural cell adhesion molecule L1-like protein precursor | K.THPVEVFEPGAEHIV.R                        | 2 | 4.08 | 0.52 | -2.90 |
| IPI00299059 | Isoform 2 of Neural cell adhesion molecule L1-like protein precursor | K.THPVEVFEPGAEHIVR.L                       | 2 | 4.64 | 0.49 | -3.61 |
| IPI00299059 | Isoform 2 of Neural cell adhesion molecule L1-like protein precursor | K.THPVEVFEPGAEHIVR.L                       | 3 | 3.70 | 0.47 | -3.09 |

|             |                                                                      |                        |   |      |      |       |
|-------------|----------------------------------------------------------------------|------------------------|---|------|------|-------|
| IPI00299059 | Isoform 2 of Neural cell adhesion molecule L1-like protein precursor | K.THPVEVFEPGAEHIVR.L   | 4 | 3.08 | 0.24 | -2.81 |
| IPI00299059 | Isoform 2 of Neural cell adhesion molecule L1-like protein precursor | K.TKSLLDGR.T           | 1 | 1.99 | 0.11 | -1.32 |
| IPI00299059 | Isoform 2 of Neural cell adhesion molecule L1-like protein precursor | K.TLKIENVSYQDK.G       | 1 | 3.05 | 0.34 | -3.45 |
| IPI00299059 | Isoform 2 of Neural cell adhesion molecule L1-like protein precursor | K.TLKIENVSYQDK.G       | 2 | 4.25 | 0.40 | -3.79 |
| IPI00299059 | Isoform 2 of Neural cell adhesion molecule L1-like protein precursor | K.TLKIENVSYQDK.G       | 3 | 2.60 | 0.27 | -1.28 |
| IPI00299059 | Isoform 2 of Neural cell adhesion molecule L1-like protein precursor | K.TLKIENVSYQDKGNYR.C   | 2 | 5.15 | 0.54 | -4.31 |
| IPI00299059 | Isoform 2 of Neural cell adhesion molecule L1-like protein precursor | K.TLKIENVSYQDKGNYR.C   | 3 | 3.80 | 0.45 | -3.32 |
| IPI00299059 | Isoform 2 of Neural cell adhesion molecule L1-like protein precursor | K.TTVILPLAPFVR.Y       | 1 | 2.70 | 0.19 | -3.73 |
| IPI00299059 | Isoform 2 of Neural cell adhesion molecule L1-like protein precursor | K.TTVILPLAPFVR.Y       | 2 | 3.66 | 0.29 | -4.32 |
| IPI00299059 | Isoform 2 of Neural cell adhesion molecule L1-like protein precursor | K.TTVILPLAPFVR.Y       | 3 | 3.41 | 0.22 | -3.67 |
| IPI00299059 | Isoform 2 of Neural cell adhesion molecule L1-like protein precursor | K.VDKDTATLSWGLPK.K     | 3 | 2.45 | 0.13 | -0.29 |
| IPI00299059 | Isoform 2 of Neural cell adhesion molecule L1-like protein precursor | K.VEEVKPLEGR.R         | 1 | 2.61 | 0.21 | -3.78 |
| IPI00299059 | Isoform 2 of Neural cell adhesion molecule L1-like protein precursor | K.VEEVKPLEGR.R         | 2 | 3.27 | 0.20 | -1.98 |
| IPI00299059 | Isoform 2 of Neural cell adhesion molecule L1-like protein precursor | K.VEEVKPLEGRR.Y        | 2 | 2.49 | 0.32 | -2.29 |
| IPI00299059 | Isoform 2 of Neural cell adhesion molecule L1-like protein precursor | K.VIKVDKDTATLSWGLPK.K  | 2 | 4.67 | 0.46 | -3.28 |
| IPI00299059 | Isoform 2 of Neural cell adhesion molecule L1-like protein precursor | K.VIKVDKDTATLSWGLPK.K  | 3 | 4.80 | 0.49 | -3.48 |
| IPI00299059 | Isoform 2 of Neural cell adhesion molecule L1-like protein precursor | K.VIKVDKDTATLSWGLPK.K  | 4 | 3.33 | 0.10 | -2.07 |
| IPI00299059 | Isoform 2 of Neural cell adhesion molecule L1-like protein precursor | K.VQAINQLGSGPD.P       | 2 | 3.00 | 0.39 | -2.45 |
| IPI00299059 | Isoform 2 of Neural cell adhesion molecule L1-like protein precursor | K.VQVAFPFDEYFQIECEAK.G | 2 | 5.71 | 0.57 | -7.38 |
| IPI00299059 | Isoform 2 of Neural cell adhesion molecule L1-like protein precursor | K.VQVAFPFDEYFQIECEAK.G | 3 | 5.20 | 0.43 | -4.39 |
| IPI00299059 | Isoform 2 of Neural cell adhesion molecule L1-like protein precursor | K.VTWSTVPK.D           | 2 | 2.36 | 0.17 | -1.30 |

|             |                                                                      |                                |   |      |      |       |
|-------------|----------------------------------------------------------------------|--------------------------------|---|------|------|-------|
| IPI00299059 | Isoform 2 of Neural cell adhesion molecule L1-like protein precursor | L.PPTESGSESSITLK.G             | 2 | 4.83 | 0.46 | -3.42 |
| IPI00299059 | Isoform 2 of Neural cell adhesion molecule L1-like protein precursor | N.GSPVDNHPFAGDVVFPR.E          | 2 | 4.00 | 0.48 | -1.80 |
| IPI00299059 | Isoform 2 of Neural cell adhesion molecule L1-like protein precursor | Q.PSQPSDHHETPPAAPDRNPQNIR.V    | 3 | 3.87 | 0.44 | -2.83 |
| IPI00299059 | Isoform 2 of Neural cell adhesion molecule L1-like protein precursor | R.ACTSQGCGKPITEESSTLGEFSK.G    | 2 | 5.38 | 0.46 |       |
| IPI00299059 | Isoform 2 of Neural cell adhesion molecule L1-like protein precursor | R.ACTSQGCGKPITEESSTLGEFSK.G    | 3 | 4.41 | 0.44 | -1.32 |
| IPI00299059 | Isoform 2 of Neural cell adhesion molecule L1-like protein precursor | R.CTASNFLGTATHDFHVIVEEPPR.W    | 3 | 4.88 | 0.49 | -5.84 |
| IPI00299059 | Isoform 2 of Neural cell adhesion molecule L1-like protein precursor | R.CTASNFLGTATHDFHVIVEEPPR.W    | 4 | 4.80 | 0.40 | -4.19 |
| IPI00299059 | Isoform 2 of Neural cell adhesion molecule L1-like protein precursor | R.CTASNFLGTATHDFHVIVEEPPRWTK.K | 3 | 4.30 | 0.41 | -1.49 |
| IPI00299059 | Isoform 2 of Neural cell adhesion molecule L1-like protein precursor | R.CTASNFLGTATHDFHVIVEEPPRWTK.K | 4 | 3.24 | 0.24 | -2.29 |
| IPI00299059 | Isoform 2 of Neural cell adhesion molecule L1-like protein precursor | R.IPNEGHIHFQGK.Y               | 2 | 4.57 | 0.44 | -4.18 |
| IPI00299059 | Isoform 2 of Neural cell adhesion molecule L1-like protein precursor | R.IPNEGHIHFQGK.Y               | 3 | 3.62 | 0.21 | -3.49 |
| IPI00299059 | Isoform 2 of Neural cell adhesion molecule L1-like protein precursor | R.NDYCCFAAFPR.L                | 1 | 1.86 | 0.45 | -2.32 |
| IPI00299059 | Isoform 2 of Neural cell adhesion molecule L1-like protein precursor | R.NDYCCFAAFPR.L                | 2 | 3.63 | 0.44 | -3.18 |
| IPI00299059 | Isoform 2 of Neural cell adhesion molecule L1-like protein precursor | R.NSGM*VPSLDAFSEFHLTVLAYNSK.G  | 3 | 3.09 | 0.40 | -2.77 |
| IPI00299059 | Isoform 2 of Neural cell adhesion molecule L1-like protein precursor | R.SQPSQPSDHHETPPAAPDR.N        | 3 | 3.06 | 0.34 | -3.26 |
| IPI00299059 | Isoform 2 of Neural cell adhesion molecule L1-like protein precursor | R.SQPSQPSDHHETPPAAPDR.N        | 4 | 2.47 | 0.20 | -3.57 |
| IPI00299059 | Isoform 2 of Neural cell adhesion molecule L1-like protein precursor | R.SQPSQPSDHHETPPAAPDRNPQNIR.V  | 2 | 3.61 | 0.48 | -2.87 |
| IPI00299059 | Isoform 2 of Neural cell adhesion molecule L1-like protein precursor | R.SQPSQPSDHHETPPAAPDRNPQNIR.V  | 3 | 3.29 | 0.45 | -3.63 |
| IPI00299059 | Isoform 2 of Neural cell adhesion molecule L1-like protein precursor | R.SQPSQPSDHHETPPAAPDRNPQNIR.V  | 5 | 2.08 | 0.32 | -2.76 |
| IPI00299059 | Isoform 2 of Neural cell adhesion molecule L1-like protein precursor | R.THPKEVNILR.F                 | 2 | 1.91 | 0.40 | -4.07 |
| IPI00299059 | Isoform 2 of Neural cell adhesion molecule L1-like protein precursor | R.TTEEDAGSYSCWVENAIGK.T        | 2 | 6.92 | 0.63 | -3.41 |



|             |                                                                      |                                           |   |      |      |       |
|-------------|----------------------------------------------------------------------|-------------------------------------------|---|------|------|-------|
| IPI00299059 | Isoform 2 of Neural cell adhesion molecule L1-like protein precursor | R.TTEEDAGSYSCWVENAIGK.T                   | 3 | 3.68 | 0.41 | -3.53 |
| IPI00299059 | Isoform 2 of Neural cell adhesion molecule L1-like protein precursor | R.VIAVNEVGR.S                             | 1 | 2.60 | 0.24 | -2.26 |
| IPI00299059 | Isoform 2 of Neural cell adhesion molecule L1-like protein precursor | R.VIAVNEVGR.S                             | 2 | 3.46 | 0.25 | -3.16 |
| IPI00299059 | Isoform 2 of Neural cell adhesion molecule L1-like protein precursor | R.VM*TPAVYAPYDVK.V                        | 1 | 2.75 | 0.38 | -3.49 |
| IPI00299059 | Isoform 2 of Neural cell adhesion molecule L1-like protein precursor | R.VM*TPAVYAPYDVK.V                        | 2 | 4.20 | 0.44 | -6.05 |
| IPI00299059 | Isoform 2 of Neural cell adhesion molecule L1-like protein precursor | R.VM*TPAVYAPYDVK.V                        | 3 | 3.42 | 0.22 | -1.87 |
| IPI00299059 | Isoform 2 of Neural cell adhesion molecule L1-like protein precursor | R.VNGSPVDNHPF.A                           | 1 | 1.84 | 0.27 | -2.89 |
| IPI00299059 | Isoform 2 of Neural cell adhesion molecule L1-like protein precursor | R.VNGSPVDNHPFAGDVVFPR.E                   | 2 | 5.26 | 0.62 | -3.33 |
| IPI00299059 | Isoform 2 of Neural cell adhesion molecule L1-like protein precursor | R.VNGSPVDNHPFAGDVVFPR.E                   | 3 | 2.83 | 0.34 | -5.15 |
| IPI00299059 | Isoform 2 of Neural cell adhesion molecule L1-like protein precursor | R.VYM*SQK.G                               | 1 | 1.63 | 0.10 | -3.36 |
| IPI00299059 | Isoform 2 of Neural cell adhesion molecule L1-like protein precursor | R.VYM*SQKGDLYFANVEEK.D                    | 2 | 5.00 | 0.51 | -3.21 |
| IPI00299059 | Isoform 2 of Neural cell adhesion molecule L1-like protein precursor | R.VYM*SQKGDLYFANVEEK.D                    | 3 | 3.11 | 0.28 | -2.30 |
| IPI00299059 | Isoform 2 of Neural cell adhesion molecule L1-like protein precursor | R.VYM*SQKGDLYFANVEEKDSR.N                 | 4 | 3.10 | 0.18 | -3.05 |
| IPI00299059 | Isoform 2 of Neural cell adhesion molecule L1-like protein precursor | S.PVDNHPFAGDVVFPR.E                       | 2 | 3.62 | 0.44 | -6.18 |
| IPI00299059 | Isoform 2 of Neural cell adhesion molecule L1-like protein precursor | S.PVDNHPFAGDVVFPR.E                       | 3 | 3.60 | 0.45 | -0.46 |
| IPI00299059 | Isoform 2 of Neural cell adhesion molecule L1-like protein precursor | V.NGSPVDNHPFAGDVVFPR.E                    | 2 | 4.03 | 0.53 | 0.67  |
| IPI00299059 | Isoform 2 of Neural cell adhesion molecule L1-like protein precursor | Y.FANVEEKDSR.N                            | 2 | 3.07 | 0.25 | -2.09 |
| IPI00299076 | Receptor-binding cancer antigen expressed on SiSo cells (Fragment)   | -.M*AITQFR.L                              | 2 | 1.63 | 0.07 | -8.18 |
| IPI00299083 | Junctional adhesion molecule B precursor                             | K.LDTGEYSCEAR.N                           | 2 | 3.60 | 0.41 | -3.89 |
| IPI00299083 | Junctional adhesion molecule B precursor                             | R.AEM*IDFNIR.I                            | 2 | 3.41 | 0.18 | -1.70 |
| IPI00299086 | Syntenin-1                                                           | K.DSTGHVGFIFK.N                           | 2 | 2.41 | 0.26 | -2.98 |
| IPI00299086 | Syntenin-1                                                           | K.SIDNGIFVQLVQANSPASLVGLR.F               | 3 | 5.41 | 0.40 | -0.98 |
| IPI00299086 | Syntenin-1                                                           | K.VDKVIQAQTAFSANPANPAILSEASAPIPHDGNLYPR.L | 4 | 3.72 | 0.10 | -2.05 |
| IPI00299086 | Syntenin-1                                                           | K.VIQAQTAFSANPANPAILSEASAPIPHDGNLYPR.L    | 3 | 4.94 | 0.45 | -3.44 |

|             |                                                                           |                                        |   |      |      |       |
|-------------|---------------------------------------------------------------------------|----------------------------------------|---|------|------|-------|
| IPI00299086 | Syntenin-1                                                                | K.VIQAQTAFSANPANPAILSEASAPIPHDGNLYPR.L | 4 | 4.04 | 0.34 | -3.24 |
| IPI00299086 | Syntenin-1                                                                | R.LKSIDNGIFVQLVQANSPASLVGLR.F          | 3 | 3.55 | 0.27 | -0.89 |
| IPI00299086 | Syntenin-1                                                                | R.PSSINYM*VAPVTGNDV GIR.R              | 2 | 4.77 | 0.58 | -1.72 |
| IPI00299116 | Podocalyxin-like protein 1 precursor                                      | K.ATFNPAQDK.C                          | 2 | 2.31 | 0.11 | -0.69 |
| IPI00299116 | Podocalyxin-like protein 1 precursor                                      | K.CEDLETQTQSEK.Q                       | 2 | 3.44 | 0.28 | -4.30 |
| IPI00299145 | Keratin, type II cytoskeletal 6C                                          | K.AQYEEIAQR.S                          | 2 | 2.37 | 0.11 | -2.21 |
| IPI00299145 | Keratin, type II cytoskeletal 6C                                          | K.KYEDEINKR.T                          | 2 | 3.00 | 0.17 | -1.46 |
| IPI00299145 | Keratin, type II cytoskeletal 6C                                          | R.NLDLDSIIAEVKAQYEEIAQR.S              | 2 | 3.36 | 0.22 |       |
| IPI00299145 | Keratin, type II cytoskeletal 6C                                          | R.NLDLDSIIAEVKAQYEEIAQR.S              | 3 | 5.87 | 0.48 |       |
| IPI00299147 | Small ubiquitin-related modifier 3 precursor                              | K.VAGQDGSVVQFK.I                       | 2 | 3.15 | 0.28 | -1.78 |
| IPI00299150 | Cathepsin S precursor                                                     | K.GPVSVDAR.H                           | 2 | 3.11 | 0.32 | -1.99 |
| IPI00299150 | Cathepsin S precursor                                                     | K.YTELPYGR.E                           | 2 | 2.30 | 0.12 | -1.31 |
| IPI00299150 | Cathepsin S precursor                                                     | K.YTELPYGREDV LK.E                     | 2 | 3.18 | 0.21 | -2.02 |
| IPI00299263 | ADP-ribosylation factor GTPase-activating protein 3                       | K.MNISGKKNVDSRLGM*GFGNCR.S             | 2 | 1.86 | 0.09 | -1.59 |
| IPI00299299 | Stress 70 protein chaperone microsome-associated 60 kDa protein precursor | K.IFTAELEAEIGRYPFK.V                   | 2 | 4.00 | 0.40 | -4.16 |
| IPI00299299 | Stress 70 protein chaperone microsome-associated 60 kDa protein precursor | K.ILVPIQV LK.E                         | 2 | 1.99 | 0.19 | -2.83 |
| IPI00299299 | Stress 70 protein chaperone microsome-associated 60 kDa protein precursor | K.LFDTLNEDLFQK.I                       | 2 | 4.44 | 0.35 | -2.12 |
| IPI00299299 | Stress 70 protein chaperone microsome-associated 60 kDa protein precursor | K.LGGQDFNQR.L                          | 2 | 3.52 | 0.21 | -1.88 |
| IPI00299299 | Stress 70 protein chaperone microsome-associated 60 kDa protein precursor | K.LKEM*AEAYLGM*PVANAVISVPAEFDLK.Q      | 3 | 3.97 | 0.25 | -3.17 |
| IPI00299299 | Stress 70 protein chaperone microsome-associated 60 kDa protein precursor | K.QIYQTYGFVPSR.K                       | 2 | 3.34 | 0.39 | -2.97 |
| IPI00299299 | Stress 70 protein chaperone microsome-associated 60 kDa protein precursor | R.KLFDTLNEDLFQK.I                      | 2 | 4.68 | 0.43 | -2.97 |
| IPI00299299 | Stress 70 protein chaperone microsome-associated 60 kDa protein precursor | R.KLFDTLNEDLFQK.I                      | 3 | 4.75 | 0.21 | -1.22 |
| IPI00299299 | Stress 70 protein chaperone microsome-associated 60 kDa protein precursor | R.LLQYLYK.Q                            | 2 | 2.72 | 0.07 | -0.50 |
| IPI00299299 | Stress 70 protein chaperone microsome-associated 60 kDa protein precursor | R.QAVEM*VK.L                           | 2 | 1.33 | 0.20 | -3.71 |
| IPI00299299 | Stress 70 protein chaperone microsome-associated 60 kDa protein precursor | R.VINEPTAAAM*AYGLHK.A                  | 2 | 4.73 | 0.54 | -3.36 |
| IPI00299399 | Protein S100-B                                                            | K.AM*VALIDVFHQYSGR.E                   | 2 | 3.98 | 0.42 | -2.66 |
| IPI00299399 | Protein S100-B                                                            | K.AM*VALIDVFHQYSGR.E                   | 3 | 3.79 | 0.38 | -2.64 |
| IPI00299399 | Protein S100-B                                                            | K.ELINNELSHFLEEIKEQEVVDK.V             | 3 | 3.91 | 0.25 | -2.16 |
| IPI00299399 | Protein S100-B                                                            | K.SELKELINNELSHFLEEIKEQEVVDK.V         | 4 | 3.13 | 0.17 | -4.15 |
| IPI00299435 | apolipoprotein F precursor                                                | R.SGVQQLIQYYQDQK.D                     | 2 | 5.06 | 0.27 |       |

|             |                                                                             |                               |   |      |      |       |
|-------------|-----------------------------------------------------------------------------|-------------------------------|---|------|------|-------|
| IPI00299485 | Complement component C1q receptor precursor                                 | R.LLDDLVTCASR.N               | 2 | 3.54 | 0.32 | -4.57 |
| IPI00299503 | Isoform 1 of Phosphatidylinositol-glycan-specific phospholipase D precursor | K.ETTLGDM*TGK.C               | 2 | 2.19 | 0.30 | -2.52 |
| IPI00299503 | Isoform 1 of Phosphatidylinositol-glycan-specific phospholipase D precursor | K.VAFLTVTLHQGGATR.M           | 2 | 2.87 | 0.25 |       |
| IPI00299503 | Isoform 1 of Phosphatidylinositol-glycan-specific phospholipase D precursor | R.ELLEHQDAYQAGIVFPDCFYPSICK.G | 3 | 4.31 | 0.09 |       |
| IPI00299503 | Isoform 1 of Phosphatidylinositol-glycan-specific phospholipase D precursor | R.FGSSLITVR.S                 | 2 | 3.36 | 0.25 | -2.00 |
| IPI00299503 | Isoform 1 of Phosphatidylinositol-glycan-specific phospholipase D precursor | R.IADVTSLIGGEDGR.V            | 2 | 4.48 | 0.51 | -1.80 |
| IPI00299503 | Isoform 1 of Phosphatidylinositol-glycan-specific phospholipase D precursor | R.ILEGFQPSGR.F                | 2 | 2.87 | 0.22 | -2.09 |
| IPI00299503 | Isoform 1 of Phosphatidylinositol-glycan-specific phospholipase D precursor | R.TM*FIGGSQLSQK.H             | 2 | 3.13 | 0.33 | -2.29 |
| IPI00299547 | Neutrophil gelatinase-associated lipocalin precursor                        | K.VPLQQNFQDNQFQGK.W           | 2 | 4.65 | 0.48 | -3.53 |
| IPI00299547 | Neutrophil gelatinase-associated lipocalin precursor                        | K.VPLQQNFQDNQFQGK.W           | 3 | 2.97 | 0.20 | 2.27  |
| IPI00299547 | Neutrophil gelatinase-associated lipocalin precursor                        | R.TKELTSELKENFIR.F            | 3 | 2.73 | 0.08 | -3.37 |
| IPI00299571 | Isoform 2 of Protein disulfide-isomerase A6 precursor                       | K.GSFSEQGINEFLR.E             | 2 | 3.65 | 0.33 | -3.08 |
| IPI00299571 | Isoform 2 of Protein disulfide-isomerase A6 precursor                       | K.IFQKGESPVYDGGGR.T           | 3 | 4.12 | 0.44 | -2.48 |
| IPI00299571 | Isoform 2 of Protein disulfide-isomerase A6 precursor                       | K.LAAVDATVNQVLASR.Y           | 2 | 4.85 | 0.46 | -0.99 |
| IPI00299571 | Isoform 2 of Protein disulfide-isomerase A6 precursor                       | K.NRPEDYQGGR.T                | 2 | 2.59 | 0.15 | -2.35 |
| IPI00299571 | Isoform 2 of Protein disulfide-isomerase A6 precursor                       | K.VGAVDADKHSLGGQYGVQGFPTIK.I  | 3 | 4.21 | 0.43 | -4.03 |
| IPI00299571 | Isoform 2 of Protein disulfide-isomerase A6 precursor                       | R.ALDLFSNAPPELLEIINEDIKR.T    | 3 | 3.57 | 0.32 | -3.67 |
| IPI00299571 | Isoform 2 of Protein disulfide-isomerase A6 precursor                       | R.TGEAIVDAALSALR.Q            | 2 | 4.17 | 0.31 | -2.99 |
| IPI00299571 | Isoform 2 of Protein disulfide-isomerase A6 precursor                       | R.TGEAIVDAALSALR.Q            | 3 | 4.83 | 0.21 | -2.61 |
| IPI00299571 | Isoform 2 of Protein disulfide-isomerase A6 precursor                       | R.TRSDIVSR.A                  | 2 | 2.90 | 0.09 | -1.45 |
| IPI00299571 | Isoform 2 of Protein disulfide-isomerase A6 precursor                       | W.AAAASEVKEQTK.G              | 2 | 3.27 | 0.32 | -2.31 |
| IPI00299627 | Dual oxidase 2 precursor                                                    | R.SSPIIIQLLSRCLQVLNR.H        | 2 | 2.73 | 0.13 |       |

|             |                                                                      |                                              |   |      |      |       |
|-------------|----------------------------------------------------------------------|----------------------------------------------|---|------|------|-------|
| IPI00299652 | Isoform Long of ADAM 11 precursor                                    | K.LNVEGTER.G                                 | 1 | 1.63 | 0.10 | -1.80 |
| IPI00299652 | Isoform Long of ADAM 11 precursor                                    | K.SVNLADVIYK.E                               | 2 | 3.57 | 0.31 | -3.85 |
| IPI00299652 | Isoform Long of ADAM 11 precursor                                    | K.SVNLADVIYKEQLNTR.I                         | 2 | 4.94 | 0.54 | -4.17 |
| IPI00299652 | Isoform Long of ADAM 11 precursor                                    | K.SVNLADVIYKEQLNTR.I                         | 3 | 4.08 | 0.47 | -2.41 |
| IPI00299652 | Isoform Long of ADAM 11 precursor                                    | R.EGLPEPSDATHLFSGR.T                         | 2 | 3.51 | 0.38 | -3.74 |
| IPI00299652 | Isoform Long of ADAM 11 precursor                                    | R.EGLPEPSDATHLFSGR.T                         | 3 | 1.90 | 0.16 | -1.61 |
| IPI00299652 | Isoform Long of ADAM 11 precursor                                    | R.LGDLVGDISSVTFYHQGK.E                       | 2 | 4.50 | 0.54 | -3.32 |
| IPI00299652 | Isoform Long of ADAM 11 precursor                                    | R.LGDLVGDISSVTFYHQGK.E                       | 3 | 2.98 | 0.41 | -3.13 |
| IPI00299652 | Isoform Long of ADAM 11 precursor                                    | R.QSVVLTSNFAK.S                              | 2 | 2.90 | 0.35 | 1.02  |
| IPI00299679 | Isoform B of Ral guanine nucleotide dissociation stimulator-like 1   | R.LSLLFLGSDM*ITSPTPK.E                       | 3 | 1.77 | 0.19 | 1.05  |
| IPI00299699 | Neural proliferation differentiation and control protein 1 precursor | L.EDEIDFLAQELAR.K                            | 2 | 4.03 | 0.27 | -5.49 |
| IPI00299699 | Neural proliferation differentiation and control protein 1 precursor | R.KESGHSTPPLPK.D                             | 2 | 1.70 | 0.07 | -4.25 |
| IPI00299699 | Neural proliferation differentiation and control protein 1 precursor | R.LEDEIDFLAQELAR.K                           | 2 | 5.68 | 0.37 | -4.91 |
| IPI00299699 | Neural proliferation differentiation and control protein 1 precursor | R.LEDEIDFLAQELAR.K                           | 3 | 5.41 | 0.29 | -3.32 |
| IPI00299699 | Neural proliferation differentiation and control protein 1 precursor | R.LEDEIDFLAQELARK.E                          | 3 | 2.50 | 0.05 | -2.36 |
| IPI00299724 | Isoform 1 of Signal regulatory protein beta-1 precursor              | K.EGHFPR.V                                   | 1 | 2.01 | 0.16 | -4.20 |
| IPI00299724 | Isoform 1 of Signal regulatory protein beta-1 precursor              | K.GSPDDVEFK.S                                | 1 | 2.24 | 0.25 | -4.42 |
| IPI00299724 | Isoform 1 of Signal regulatory protein beta-1 precursor              | K.GSPDDVEFK.S                                | 2 | 1.94 | 0.32 | -2.31 |
| IPI00299724 | Isoform 1 of Signal regulatory protein beta-1 precursor              | K.SGAGTELSVR.A                               | 1 | 1.96 | 0.38 | -2.71 |
| IPI00299724 | Isoform 1 of Signal regulatory protein beta-1 precursor              | K.SGAGTELSVR.A                               | 2 | 3.47 | 0.31 | -2.61 |
| IPI00299724 | Isoform 1 of Signal regulatory protein beta-1 precursor              | R.KGSPDDVEFK.S                               | 1 | 2.78 | 0.32 | -3.92 |
| IPI00299724 | Isoform 1 of Signal regulatory protein beta-1 precursor              | R.KGSPDDVEFK.S                               | 2 | 3.05 | 0.34 | -3.33 |
| IPI00299738 | Procollagen C-endopeptidase enhancer 1 precursor                     | K.AQGLTTPNWPESDYPPGISCSWHIAPPDQVIALTFEK.F    | 3 | 5.98 | 0.63 | -5.12 |
| IPI00299738 | Procollagen C-endopeptidase enhancer 1 precursor                     | K.GVSYLLM*GQVEENRGPVLPPEFVVLHRPNQDQILTNLSK.R | 4 | 4.74 | 0.24 | -3.15 |
| IPI00299738 | Procollagen C-endopeptidase enhancer 1 precursor                     | K.GVSYLLM*GQVEENRGPVLPPEFVVLHRPNQDQILTNLSK.R | 5 | 3.90 | 0.29 | -3.58 |

|             |                                                     |                                         |   |      |      |       |
|-------------|-----------------------------------------------------|-----------------------------------------|---|------|------|-------|
| IPI00299738 | Procollagen C-endopeptidase enhancer 1 precursor    | K.SM*VREPGGLAVTVSLIGAYK.T               | 3 | 3.13 | 0.24 | -2.90 |
| IPI00299738 | Procollagen C-endopeptidase enhancer 1 precursor    | K.TGGLDLPSPPTGASLK.F                    | 2 | 3.62 | 0.31 | -2.75 |
| IPI00299738 | Procollagen C-endopeptidase enhancer 1 precursor    | R.ATSGTEHQFCGGR.L                       | 2 | 3.82 | 0.30 |       |
| IPI00299738 | Procollagen C-endopeptidase enhancer 1 precursor    | R.EPGGLAVTVSLIGAYK.T                    | 2 | 2.72 | 0.37 |       |
| IPI00299738 | Procollagen C-endopeptidase enhancer 1 precursor    | R.FCGTFRPAPLVAPGNQVTLR.M                | 2 | 3.63 | 0.43 | -3.44 |
| IPI00299738 | Procollagen C-endopeptidase enhancer 1 precursor    | R.FCGTFRPAPLVAPGNQVTLR.M                | 3 | 4.19 | 0.23 | -3.05 |
| IPI00299738 | Procollagen C-endopeptidase enhancer 1 precursor    | R.GFLLWYSGR.A                           | 1 | 1.89 | 0.11 | -0.69 |
| IPI00299738 | Procollagen C-endopeptidase enhancer 1 precursor    | R.GFLLWYSGR.A                           | 2 | 3.46 | 0.24 | -1.48 |
| IPI00299738 | Procollagen C-endopeptidase enhancer 1 precursor    | R.VFDLELHPACR.Y                         | 2 | 2.98 | 0.28 |       |
| IPI00299738 | Procollagen C-endopeptidase enhancer 1 precursor    | R.YDALEVFAGSGTSGQR.L                    | 2 | 5.84 | 0.55 | -3.78 |
| IPI00299738 | Procollagen C-endopeptidase enhancer 1 precursor    | R.YDALEVFAGSGTSGQR.L                    | 3 | 3.74 | 0.43 | -2.24 |
| IPI00299738 | Procollagen C-endopeptidase enhancer 1 precursor    | R.YDSVSFNGAVSDDSR.R                     | 2 | 4.87 | 0.51 | -4.76 |
| IPI00299738 | Procollagen C-endopeptidase enhancer 1 precursor    | R.YDSVSFNGAVSDDSR.L                     | 2 | 2.86 | 0.18 | -3.73 |
| IPI00299758 | Carbohydrate sulfotransferase 12                    | K.LYEADFVLFYYPKPENLLRD.-                | 3 | 4.14 | 0.49 | -3.56 |
| IPI00299758 | Carbohydrate sulfotransferase 12                    | R.ELTADSDVDFLDKFLSAGVK.Q                | 3 | 2.18 | 0.25 | -4.38 |
| IPI00299758 | Carbohydrate sulfotransferase 12                    | R.KETEQPPAPGSM*EESVR.G                  | 3 | 3.16 | 0.24 | -1.99 |
| IPI00299778 | Serum paraoxonase/lactonase 3                       | K.YPGM*PNFAPDEPGKIFLM*DLNEQNPR.A        | 3 | 3.81 | 0.32 |       |
| IPI00300020 | Excitatory amino acid transporter 2                 | R.VHEDIEM*TK.T                          | 2 | 2.54 | 0.20 | -2.18 |
| IPI00300052 | Keratin type II cuticular Hb4                       | K.LLEGEESR.I                            | 2 | 2.26 | 0.06 | -3.07 |
| IPI00300207 | Isoform 1 of Uncharacterized protein FLJ44066       | R.SLGATLK.Y                             | 1 | 1.68 | 0.05 | -3.46 |
| IPI00300241 | Leucine-rich repeat-containing protein 4B precursor | K.DIPNLTALVRLEELELSGNNR.L               | 3 | 2.17 | 0.13 | -3.08 |
| IPI00300241 | Leucine-rich repeat-containing protein 4B precursor | K.IEVGAFNGLPSLNTLELFDNR.L               | 2 | 5.02 | 0.57 | -4.94 |
| IPI00300241 | Leucine-rich repeat-containing protein 4B precursor | K.IEVGAFNGLPSLNTLELFDNR.L               | 3 | 5.81 | 0.43 | -5.72 |
| IPI00300241 | Leucine-rich repeat-containing protein 4B precursor | K.IEVGAFNGLPSLNTLELFDNRLTTVPTQAFEYLSK.L | 3 | 6.21 | 0.51 | -3.73 |

|             |                                                     |                                          |   |      |      |       |
|-------------|-----------------------------------------------------|------------------------------------------|---|------|------|-------|
| IPI00300241 | Leucine-rich repeat-containing protein 4B precursor | K.IEVGAFNGLPSLNTLELFDNRLTTVPTQAFEYLSK.L  | 4 | 2.65 | 0.14 | -4.50 |
| IPI00300241 | Leucine-rich repeat-containing protein 4B precursor | K.LWLM*HAQVATIER.N                       | 3 | 2.84 | 0.28 | -3.65 |
| IPI00300241 | Leucine-rich repeat-containing protein 4B precursor | K.SLEELNLSHNNLM*SLPHDLFTPLHR.L           | 3 | 4.53 | 0.49 | -4.93 |
| IPI00300241 | Leucine-rich repeat-containing protein 4B precursor | K.SLEELNLSHNNLM*SLPHDLFTPLHR.L           | 4 | 3.95 | 0.34 | -4.76 |
| IPI00300241 | Leucine-rich repeat-containing protein 4B precursor | K.SLEELNLSHNNLM*SLPHDLFTPLHR.L           | 5 | 3.41 | 0.35 | -4.55 |
| IPI00300241 | Leucine-rich repeat-containing protein 4B precursor | R.DLAEVPASIPVNTR.Y                       | 2 | 4.37 | 0.51 | -4.99 |
| IPI00300241 | Leucine-rich repeat-containing protein 4B precursor | R.DLAEVPASIPVNTR.Y                       | 3 | 2.40 | 0.26 | -2.91 |
| IPI00300241 | Leucine-rich repeat-containing protein 4B precursor | R.HLEILQLSK.N                            | 1 | 2.59 | 0.16 | -3.45 |
| IPI00300241 | Leucine-rich repeat-containing protein 4B precursor | R.HLEILQLSK.N                            | 2 | 2.26 | 0.26 | -1.77 |
| IPI00300241 | Leucine-rich repeat-containing protein 4B precursor | R.KIEVGAFNGLPSLNTLELFDNR.L               | 2 | 5.36 | 0.60 | -1.84 |
| IPI00300241 | Leucine-rich repeat-containing protein 4B precursor | R.KIEVGAFNGLPSLNTLELFDNR.L               | 3 | 5.57 | 0.47 | -1.27 |
| IPI00300241 | Leucine-rich repeat-containing protein 4B precursor | R.KIEVGAFNGLPSLNTLELFDNRLTTVPTQAFEYLSK.L | 4 | 3.50 | 0.26 | -4.55 |
| IPI00300241 | Leucine-rich repeat-containing protein 4B precursor | R.LDLGELKRLEYISEAAFEGLVNLR.Y             | 3 | 4.14 | 0.31 | -2.86 |
| IPI00300241 | Leucine-rich repeat-containing protein 4B precursor | R.LDLIRPGSFQGLTSLR.K                     | 2 | 2.82 | 0.30 | -3.79 |
| IPI00300241 | Leucine-rich repeat-containing protein 4B precursor | R.LDLIRPGSFQGLTSLR.K                     | 3 | 4.07 | 0.39 | -2.00 |
| IPI00300241 | Leucine-rich repeat-containing protein 4B precursor | R.LDLIRPGSFQGLTSLRK.L                    | 2 | 1.98 | 0.24 | -1.92 |
| IPI00300241 | Leucine-rich repeat-containing protein 4B precursor | R.LDLIRPGSFQGLTSLRK.L                    | 3 | 4.09 | 0.25 | -2.78 |
| IPI00300241 | Leucine-rich repeat-containing protein 4B precursor | R.LEELELSGNRLDLIRPGSFQGLTSLR.K           | 3 | 3.28 | 0.29 | -3.78 |
| IPI00300241 | Leucine-rich repeat-containing protein 4B precursor | R.LEELELSGNRLDLIRPGSFQGLTSLR.K           | 4 | 4.09 | 0.36 | -3.61 |
| IPI00300241 | Leucine-rich repeat-containing protein 4B precursor | R.LEELELSGNRLDLIRPGSFQGLTSLRK.L          | 4 | 4.29 | 0.21 | -4.99 |
| IPI00300241 | Leucine-rich repeat-containing protein 4B precursor | R.LEYISEAAFEGLVNLR.Y                     | 2 | 2.68 | 0.17 | 0.57  |

|             |                                                     |                                       |   |      |      |       |
|-------------|-----------------------------------------------------|---------------------------------------|---|------|------|-------|
| IPI00300241 | Leucine-rich repeat-containing protein 4B precursor | R.LTTVPTQAFEYLSK.L                    | 2 | 3.44 | 0.35 | -3.50 |
| IPI00300241 | Leucine-rich repeat-containing protein 4B precursor | R.NAFDDLK.S                           | 1 | 2.24 | 0.10 | -3.77 |
| IPI00300241 | Leucine-rich repeat-containing protein 4B precursor | R.NAFDDLKSLEELNLSHNNLM*SLPHDLFTPLHR.L | 3 | 5.05 | 0.51 | -4.61 |
| IPI00300241 | Leucine-rich repeat-containing protein 4B precursor | R.NAFDDLKSLEELNLSHNNLM*SLPHDLFTPLHR.L | 5 | 3.65 | 0.33 | -3.80 |
| IPI00300241 | Leucine-rich repeat-containing protein 4B precursor | R.NAFDDLKSLEELNLSHNNLM*SLPHDLFTPLHR.L | 6 | 2.64 | 0.24 | -4.04 |
| IPI00300241 | Leucine-rich repeat-containing protein 4B precursor | R.NNPISIPSYAFNR.V                     | 2 | 4.73 | 0.49 | -3.34 |
| IPI00300241 | Leucine-rich repeat-containing protein 4B precursor | R.NNPISIPSYAFNR.V                     | 3 | 2.28 | 0.13 | -1.75 |
| IPI00300241 | Leucine-rich repeat-containing protein 4B precursor | R.PGSFQGLTSLR.K                       | 2 | 3.28 | 0.35 | -1.50 |
| IPI00300241 | Leucine-rich repeat-containing protein 4B precursor | R.RDLA EVPASIPVNTR.Y                  | 2 | 4.26 | 0.38 | -2.51 |
| IPI00300241 | Leucine-rich repeat-containing protein 4B precursor | R.RDLA EVPASIPVNTR.Y                  | 3 | 3.38 | 0.31 | -1.71 |
| IPI00300241 | Leucine-rich repeat-containing protein 4B precursor | R.TDTFKHLR.H                          | 2 | 2.05 | 0.07 | -2.15 |
| IPI00300241 | Leucine-rich repeat-containing protein 4B precursor | R.YIGELDQSHFTCYAP.V                   | 2 | 2.92 | 0.33 | -3.27 |
| IPI00300241 | Leucine-rich repeat-containing protein 4B precursor | R.YLNLGM*CNLKDIPNLTLVR.L              | 3 | 3.86 | 0.27 | -1.93 |
| IPI00300241 | Leucine-rich repeat-containing protein 4B precursor | R.YLNLQENGIQVIR.T                     | 2 | 4.09 | 0.29 | -2.55 |
| IPI00300241 | Leucine-rich repeat-containing protein 4B precursor | R.YLNLQENGIQVIR.T                     | 3 | 4.83 | 0.32 | -1.12 |
| IPI00300244 | zinc finger, CW type with PWWP domain 1             | K.RIFAPPAQKSYSLPCSPNSPK.E             | 3 | 2.58 | 0.18 |       |
| IPI00300407 | Syndecan-2 precursor                                | R.KM*DPAEEDTNVYTEK.H                  | 2 | 4.03 | 0.40 | -4.36 |
| IPI00300407 | Syndecan-2 precursor                                | R.KM*DPAEEDTNVYTEK.H                  | 3 | 3.67 | 0.28 | -2.30 |
| IPI00300623 | Pro-MCH precursor                                   | K.GFQKEDTAEK.S                        | 2 | 2.92 | 0.21 | -1.87 |
| IPI00300623 | Pro-MCH precursor                                   | R.NLDDDM*VFNTFR.L                     | 2 | 4.03 | 0.49 | -2.21 |
| IPI00300725 | Keratin, type II cytoskeletal 6A                    | K.AQYEEIAQR.S                         | 2 | 2.37 | 0.11 | -2.21 |
| IPI00300725 | Keratin, type II cytoskeletal 6A                    | K.KYEDEINKR.T                         | 2 | 3.00 | 0.17 | -1.46 |
| IPI00300725 | Keratin, type II cytoskeletal 6A                    | R.NLDLDSIIAEVKAQYEEIAQR.S             | 2 | 3.36 | 0.22 |       |
| IPI00300725 | Keratin, type II cytoskeletal 6A                    | R.NLDLDSIIAEVKAQYEEIAQR.S             | 3 | 5.87 | 0.48 |       |
| IPI00300838 | Carbohydrate sulfotransferase 8                     | F.ISLQDPTELAPQQVPGIK.F                | 2 | 4.82 | 0.39 | -3.64 |
| IPI00300838 | Carbohydrate sulfotransferase 8                     | F.ISLQDPTELAPQQVPGIK.F                | 3 | 4.15 | 0.34 | -3.63 |
| IPI00300838 | Carbohydrate sulfotransferase 8                     | I.SLQDPTELAPQQVPGIK.F                 | 2 | 4.48 | 0.39 | -4.53 |

|             |                                                   |                                           |   |      |      |       |
|-------------|---------------------------------------------------|-------------------------------------------|---|------|------|-------|
| IPI00300838 | Carbohydrate sulfotransferase 8                   | R.DLSSGAPR.G                              | 2 | 2.26 | 0.19 | -3.97 |
| IPI00300838 | Carbohydrate sulfotransferase 8                   | R.NLPAPDQPQPPLQR.G                        | 2 | 3.74 | 0.39 | -3.96 |
| IPI00300990 | Isoform 1 of Uncharacterized protein C1orf77      | R.GGMSLR.G                                | 1 | 1.29 | 0.06 | 2.52  |
| IPI00301058 | Vasodilator-stimulated phosphoprotein             | R.VKQELLEEVKKELQKVKEEIIIEAFVQELRKRKRGSP.- | 3 | 2.98 | 0.16 |       |
| IPI00301098 | Uncharacterized protein C1orf187 precursor        | K.CFDDCM*CVEGLR.C                         | 2 | 3.40 | 0.49 | -3.77 |
| IPI00301143 | Isoform 1 of Peptidase inhibitor 16 precursor     | K.LQGVEETNIELLVVCNYEPPGNVK.G              | 2 | 4.79 | 0.49 | -1.97 |
| IPI00301143 | Isoform 1 of Peptidase inhibitor 16 precursor     | K.LQGVEETNIELLVVCNYEPPGNVK.G              | 3 | 2.62 | 0.15 | -4.73 |
| IPI00301143 | Isoform 1 of Peptidase inhibitor 16 precursor     | K.SADKVTDKTKVPSR.S                        | 3 | 2.61 | 0.08 | -2.63 |
| IPI00301143 | Isoform 1 of Peptidase inhibitor 16 precursor     | R.AQVSPTASDM*LHM*R.W                      | 2 | 3.65 | 0.50 | -3.82 |
| IPI00301143 | Isoform 1 of Peptidase inhibitor 16 precursor     | R.AQVSPTASDM*LHM*R.W                      | 3 | 1.84 | 0.15 | -7.17 |
| IPI00301143 | Isoform 1 of Peptidase inhibitor 16 precursor     | R.LM*VELHNLZR.A                           | 2 | 3.19 | 0.36 | -3.71 |
| IPI00301143 | Isoform 1 of Peptidase inhibitor 16 precursor     | R.LM*VELHNLZR.A                           | 3 | 3.37 | 0.27 | -3.62 |
| IPI00301143 | Isoform 1 of Peptidase inhibitor 16 precursor     | R.SPENSLDPK.M                             | 2 | 2.36 | 0.15 | -1.15 |
| IPI00301143 | Isoform 1 of Peptidase inhibitor 16 precursor     | R.WDEELAAFAK.A                            | 1 | 2.41 | 0.35 | -3.23 |
| IPI00301143 | Isoform 1 of Peptidase inhibitor 16 precursor     | R.WDEELAAFAK.A                            | 2 | 4.05 | 0.43 | -2.66 |
| IPI00301180 | Isoform 2 of Solute carrier family 12 member 5    | K.NKGPSVPSSEGIKD.F                        | 2 | 3.23 | 0.35 | -3.44 |
| IPI00301180 | Isoform 2 of Solute carrier family 12 member 5    | R.EIQSITDESR.G                            | 2 | 3.27 | 0.29 | -2.75 |
| IPI00301255 | Immunoglobulin superfamily member 21 precursor    | G.YLTVNIEPLPPVAGDAVTLK.C                  | 2 | 5.73 | 0.41 | -4.14 |
| IPI00301255 | Immunoglobulin superfamily member 21 precursor    | K.HPALSM*PM*QAEVTLVAPK.G                  | 3 | 2.41 | 0.09 | -2.61 |
| IPI00301255 | Immunoglobulin superfamily member 21 precursor    | K.SLSLLDAENR.G                            | 1 | 2.42 | 0.26 | -3.56 |
| IPI00301255 | Immunoglobulin superfamily member 21 precursor    | K.SLSLLDAENR.G                            | 2 | 3.50 | 0.21 | -1.84 |
| IPI00301255 | Immunoglobulin superfamily member 21 precursor    | R.LIVFENPNIPR.G                           | 2 | 3.26 | 0.42 | -3.10 |
| IPI00301255 | Immunoglobulin superfamily member 21 precursor    | R.LLDGSAEFDGK.E                           | 2 | 2.33 | 0.35 | -2.44 |
| IPI00301255 | Immunoglobulin superfamily member 21 precursor    | R.TPSSDGTVEVR.A                           | 2 | 3.16 | 0.27 | -1.48 |
| IPI00301288 | polydom                                           | Y.DDFLDTVQETATSIGNAK.S                    | 2 | 5.64 | 0.51 | -2.72 |
| IPI00301288 | polydom                                           | Y.DDFLDTVQETATSIGNAK.S                    | 3 | 3.62 | 0.36 | -1.41 |
| IPI00301294 | Protein FAM134A                                   | R.DLGEEGEGELAPPEDLLGRPQALSR.Q             | 3 | 2.80 | 0.32 | -2.49 |
| IPI00301364 | Isoform 1 of S-phase kinase-associated protein 1A | K.TM*LEDLGM*DDEGDDDPVPLPNVNAAILKK.V       | 3 | 4.93 | 0.44 | -3.41 |
| IPI00301364 | Isoform 1 of S-phase kinase-associated protein 1A | K.TVANM*IK.G                              | 1 | 1.33 | 0.11 | -2.41 |
| IPI00301364 | Isoform 1 of S-phase kinase-associated protein 1A | K.VDQGTLFELILAANYLDIK.G                   | 2 | 4.99 | 0.51 | -3.00 |
| IPI00301364 | Isoform 1 of S-phase kinase-associated protein 1A | K.VDQGTLFELILAANYLDIK.G                   | 3 | 3.95 | 0.24 | -2.72 |
| IPI00301395 | Probable serine carboxypeptidase CPVL precursor   | K.FLSLPEVR.Q                              | 1 | 1.33 | 0.09 | -3.29 |
| IPI00301395 | Probable serine carboxypeptidase CPVL precursor   | K.FLSLPEVR.Q                              | 2 | 2.30 | 0.09 | -1.01 |
| IPI00301395 | Probable serine carboxypeptidase CPVL precursor   | K.GRELSLVGPPFGLNM*K.S                     | 2 | 3.88 | 0.50 | -2.82 |



|             |                                                 |                                         |   |      |      |       |
|-------------|-------------------------------------------------|-----------------------------------------|---|------|------|-------|
| IPI00301395 | Probable serine carboxypeptidase CPVL precursor | K.IFKSDSEVAGYIR.Q                       | 2 | 4.16 | 0.39 | 0.02  |
| IPI00301395 | Probable serine carboxypeptidase CPVL precursor | K.INLNGIAIGDGYSDPESIIGGYAEFLYQIGLLDEK.Q | 3 | 3.26 | 0.36 | -3.12 |
| IPI00301395 | Probable serine carboxypeptidase CPVL precursor | K.NNDFYVTGESYAGK.Y                      | 2 | 3.77 | 0.39 | -4.49 |
| IPI00301395 | Probable serine carboxypeptidase CPVL precursor | K.QNWFEAFEILDK.L                        | 2 | 3.69 | 0.34 | -4.22 |
| IPI00301395 | Probable serine carboxypeptidase CPVL precursor | K.SDSEVAGYIR.Q                          | 2 | 2.08 | 0.11 | -2.48 |
| IPI00301395 | Probable serine carboxypeptidase CPVL precursor | R.CTEPEDQLYYVK.F                        | 2 | 4.05 | 0.38 | -3.87 |
| IPI00301395 | Probable serine carboxypeptidase CPVL precursor | R.ELSLVGPFPGLNM*K.S                     | 2 | 2.86 | 0.32 | -2.77 |
| IPI00301395 | Probable serine carboxypeptidase CPVL precursor | R.GGGHILPYDQPLR.A                       | 2 | 3.01 | 0.35 | -3.79 |
| IPI00301395 | Probable serine carboxypeptidase CPVL precursor | R.GGGHILPYDQPLR.A                       | 3 | 3.66 | 0.15 | -3.36 |
| IPI00301395 | Probable serine carboxypeptidase CPVL precursor | R.QNWFEAFEILDK.L                        | 3 | 4.49 | 0.23 | -3.21 |
| IPI00301395 | Probable serine carboxypeptidase CPVL precursor | R.SVSM*PPKGDGSGQPLFLTPYIEAGK.I          | 3 | 5.02 | 0.40 | -2.93 |
| IPI00301459 | 1-O-acylceramide synthase precursor             | K.ICFGDGDGTVNLK.S                       | 2 | 3.90 | 0.46 | -3.64 |
| IPI00301459 | 1-O-acylceramide synthase precursor             | K.TFSLEFLDPSK.S                         | 2 | 3.69 | 0.27 | -4.00 |
| IPI00301459 | 1-O-acylceramide synthase precursor             | P.AGRHPPVVLVPGDLGNQLEAK.L               | 2 | 4.28 | 0.49 | -3.84 |
| IPI00301459 | 1-O-acylceramide synthase precursor             | R.AFVSLGAPWGGVAK.T                      | 2 | 3.72 | 0.10 | -3.28 |
| IPI00301459 | 1-O-acylceramide synthase precursor             | R.APNENGPYFLALR.E                       | 2 | 3.76 | 0.40 | -3.29 |
| IPI00301459 | 1-O-acylceramide synthase precursor             | R.ATQFPDGVDR.V                          | 2 | 2.47 | 0.23 | -3.35 |
| IPI00301459 | 1-O-acylceramide synthase precursor             | R.HPPVVLVPGDLGNQLEAK.L                  | 3 | 3.04 | 0.31 | -2.33 |
| IPI00301459 | 1-O-acylceramide synthase precursor             | R.VLASGDNNRIPVIGPLK.I                   | 2 | 2.94 | 0.24 | -2.99 |
| IPI00301459 | 1-O-acylceramide synthase precursor             | R.VLASGDNNRIPVIGPLK.I                   | 3 | 2.77 | 0.06 | -2.34 |
| IPI00301459 | 1-O-acylceramide synthase precursor             | R.VPGFGK.T                              | 1 | 1.75 | 0.19 | -2.39 |
| IPI00301465 | 14-3-3-associated AKT substrate                 | K.YNQPFEDTPVVQMATLTYETPQGLR.I           | 4 | 3.11 | 0.09 | -1.10 |
| IPI00301579 | Epididymal secretory protein E1 precursor       | D.KTYSYLNKLPVKSEYPSIK.L                 | 3 | 4.04 | 0.33 | -3.64 |
| IPI00301579 | Epididymal secretory protein E1 precursor       | K.AVVHGILM*GVPVFPPIPEPDGCK.S            | 2 | 3.85 | 0.45 | -1.85 |
| IPI00301579 | Epididymal secretory protein E1 precursor       | K.AVVHGILM*GVPVFPPIPEPDGCK.S            | 3 | 4.26 | 0.35 | -6.97 |
| IPI00301579 | Epididymal secretory protein E1 precursor       | K.DCGSVDGVIK.E                          | 1 | 2.20 | 0.23 | -4.15 |
| IPI00301579 | Epididymal secretory protein E1 precursor       | K.DCGSVDGVIK.E                          | 2 | 3.13 | 0.28 | -2.78 |
| IPI00301579 | Epididymal secretory protein E1 precursor       | K.DCGSVDGVIKEVNVSPCPTQPCQLSK.G          | 2 | 3.93 | 0.41 | -2.58 |
| IPI00301579 | Epididymal secretory protein E1 precursor       | K.DCGSVDGVIKEVNVSPCPTQPCQLSK.G          | 3 | 5.50 | 0.43 | -4.11 |
| IPI00301579 | Epididymal secretory protein E1 precursor       | K.DCGSVDGVIKEVNVSPCPTQPCQLSK.G          | 4 | 4.37 | 0.37 | -2.66 |
| IPI00301579 | Epididymal secretory protein E1 precursor       | K.DKTYSYLNK.L                           | 1 | 2.63 | 0.21 | -4.42 |

|             |                                                                        |                                  |   |      |      |       |
|-------------|------------------------------------------------------------------------|----------------------------------|---|------|------|-------|
| IPI00301579 | Epididymal secretory protein E1 precursor                              | K.DKTYSYLNK.L                    | 2 | 2.65 | 0.13 | -3.47 |
| IPI00301579 | Epididymal secretory protein E1 precursor                              | K.DKTYSYLNKLPVK.S                | 2 | 4.66 | 0.35 | -3.78 |
| IPI00301579 | Epididymal secretory protein E1 precursor                              | K.DKTYSYLNKLPVK.S                | 3 | 3.78 | 0.39 | -2.52 |
| IPI00301579 | Epididymal secretory protein E1 precursor                              | K.DKTYSYLNKLPVKSEYPSIK.L         | 2 | 5.65 | 0.50 | -4.30 |
| IPI00301579 | Epididymal secretory protein E1 precursor                              | K.DKTYSYLNKLPVKSEYPSIK.L         | 3 | 5.19 | 0.45 | -4.79 |
| IPI00301579 | Epididymal secretory protein E1 precursor                              | K.DKTYSYLNKLPVKSEYPSIK.L         | 4 | 2.80 | 0.17 | -3.01 |
| IPI00301579 | Epididymal secretory protein E1 precursor                              | K.EVNVSPCPTQPCQLSK.G             | 2 | 3.92 | 0.45 | -3.11 |
| IPI00301579 | Epididymal secretory protein E1 precursor                              | K.EVNVSPCPTQPCQLSK.G             | 3 | 3.33 | 0.34 | -1.91 |
| IPI00301579 | Epididymal secretory protein E1 precursor                              | K.LPVKSEYPSIK.L                  | 1 | 2.75 | 0.34 | -4.25 |
| IPI00301579 | Epididymal secretory protein E1 precursor                              | K.LPVKSEYPSIK.L                  | 2 | 3.84 | 0.40 | -4.32 |
| IPI00301579 | Epididymal secretory protein E1 precursor                              | K.LPVKSEYPSIK.L                  | 3 | 2.85 | 0.31 | -4.38 |
| IPI00301579 | Epididymal secretory protein E1 precursor                              | K.LVVEWQLQDDK.N                  | 2 | 4.09 | 0.32 | -3.05 |
| IPI00301579 | Epididymal secretory protein E1 precursor                              | K.LVVEWQLQDDKNQSLFCWEIPVQIVSHL.- | 3 | 3.07 | 0.20 | -4.66 |
| IPI00301579 | Epididymal secretory protein E1 precursor                              | K.NQSLFCWEIPVQIVSHL              | 2 | 4.00 | 0.38 | -3.76 |
| IPI00301579 | Epididymal secretory protein E1 precursor                              | K.NQSLFCWEIPVQIVSHL.-            | 2 | 3.55 | 0.36 | -4.15 |
| IPI00301579 | Epididymal secretory protein E1 precursor                              | K.SEYPSIK.L                      | 1 | 2.01 | 0.14 | -2.76 |
| IPI00301579 | Epididymal secretory protein E1 precursor                              | K.SEYPSIK.L                      | 2 | 2.24 | 0.15 | -3.02 |
| IPI00301579 | Epididymal secretory protein E1 precursor                              | K.SGINCPIQK.D                    | 2 | 2.93 | 0.07 | 0.12  |
| IPI00301579 | Epididymal secretory protein E1 precursor                              | K.TYSYLNK.L                      | 1 | 1.78 | 0.18 | -2.31 |
| IPI00301579 | Epididymal secretory protein E1 precursor                              | K.TYSYLNK.L                      | 2 | 2.35 | 0.20 | -1.13 |
| IPI00301579 | Epididymal secretory protein E1 precursor                              | K.TYSYLNKLPVK.S                  | 1 | 2.75 | 0.17 | -2.88 |
| IPI00301579 | Epididymal secretory protein E1 precursor                              | K.TYSYLNKLPVK.S                  | 2 | 3.24 | 0.32 | -3.90 |
| IPI00301579 | Epididymal secretory protein E1 precursor                              | K.TYSYLNKLPVK.S                  | 3 | 1.55 | 0.22 | -3.22 |
| IPI00301579 | Epididymal secretory protein E1 precursor                              | K.TYSYLNKLPVKSEYPSIK.L           | 2 | 4.46 | 0.44 | -4.67 |
| IPI00301579 | Epididymal secretory protein E1 precursor                              | K.TYSYLNKLPVKSEYPSIK.L           | 3 | 3.88 | 0.43 | -3.11 |
| IPI00301579 | Epididymal secretory protein E1 precursor                              | K.TYSYLNKLPVKSEYPSIK.L           | 4 | 2.83 | 0.21 | -2.83 |
| IPI00301631 | Isoform 1 of Torsin-3A precursor                                       | K.EETLDEIAQM*MVYVPK.E            | 2 | 2.61 | 0.13 |       |
| IPI00301812 | Isoform 1 of SPARC-related modular calcium-binding protein 1 precursor | R.QSALEEAQQNPR.E                 | 2 | 3.76 | 0.37 | -3.25 |
| IPI00301812 | Isoform 1 of SPARC-related modular calcium-binding protein 1 precursor | R.SYESM*CEYQR.A                  | 2 | 3.26 | 0.47 | -1.67 |
| IPI00301865 | Isoform 1 of Transmembrane protein 132A precursor                      | A.PLDPVYLPAALELLDAPEHFR.V        | 2 | 3.28 | 0.43 | -4.50 |
| IPI00301865 | Isoform 1 of Transmembrane protein 132A precursor                      | C.GQAPLDPVYLPAALELLDAPEHFR.V     | 2 | 4.72 | 0.56 | -2.77 |
| IPI00301865 | Isoform 1 of Transmembrane protein 132A precursor                      | D.PVYLPAALELLDAPEHFR.V           | 2 | 4.53 | 0.45 | -4.81 |
| IPI00301865 | Isoform 1 of Transmembrane protein 132A precursor                      | D.PVYLPAALELLDAPEHFR.V           | 3 | 4.71 | 0.41 | -2.66 |
| IPI00301865 | Isoform 1 of Transmembrane protein 132A precursor                      | K.AEELVNTAPLTGVPQHVPVR.L         | 2 | 4.17 | 0.44 | 1.87  |

|             |                                                   |                               |   |      |      |       |
|-------------|---------------------------------------------------|-------------------------------|---|------|------|-------|
| IPI00301865 | Isoform 1 of Transmembrane protein 132A precursor | K.AEELVNTAPLTGVPQHVPVR.L      | 3 | 3.90 | 0.38 | -1.92 |
| IPI00301865 | Isoform 1 of Transmembrane protein 132A precursor | K.M*VWEILVSR.D                | 2 | 2.53 | 0.20 | -2.78 |
| IPI00301865 | Isoform 1 of Transmembrane protein 132A precursor | Q.APLDPVYLPAALELLDAPEHFR.V    | 3 | 4.85 | 0.55 | -4.47 |
| IPI00301865 | Isoform 1 of Transmembrane protein 132A precursor | R.ASYPPFATQQVPPR.V            | 2 | 2.78 | 0.22 | -0.74 |
| IPI00301865 | Isoform 1 of Transmembrane protein 132A precursor | R.ASYPPFATQQVPPR.V            | 3 | 3.96 | 0.28 | -1.65 |
| IPI00301865 | Isoform 1 of Transmembrane protein 132A precursor | R.AVSVEAAVTPAEPYAR.V          | 2 | 3.32 | 0.45 | -3.43 |
| IPI00301865 | Isoform 1 of Transmembrane protein 132A precursor | R.FLAPFAAHPLDGGR.R            | 2 | 3.62 | 0.41 | -3.65 |
| IPI00301865 | Isoform 1 of Transmembrane protein 132A precursor | R.FLAPFAAHPLDGGR.R            | 3 | 2.52 | 0.23 | -1.10 |
| IPI00301865 | Isoform 1 of Transmembrane protein 132A precursor | R.FLAPFAAHPLDGGR.L            | 4 | 2.19 | 0.17 | -1.42 |
| IPI00301865 | Isoform 1 of Transmembrane protein 132A precursor | R.IELTDTTLEQVR.G              | 2 | 4.32 | 0.38 | -1.24 |
| IPI00301865 | Isoform 1 of Transmembrane protein 132A precursor | R.LTVWAPLLPLR.I               | 2 | 3.47 | 0.29 | -3.39 |
| IPI00301865 | Isoform 1 of Transmembrane protein 132A precursor | R.QVAGSVGGNTGVR.G             | 2 | 3.29 | 0.33 | -1.83 |
| IPI00301865 | Isoform 1 of Transmembrane protein 132A precursor | R.SETFLLQPWPR.A               | 2 | 3.57 | 0.33 | -4.77 |
| IPI00301865 | Isoform 1 of Transmembrane protein 132A precursor | R.SPLSDSILGEQALAVTDDKVSLELR.V | 2 | 5.16 | 0.56 | -2.96 |
| IPI00301865 | Isoform 1 of Transmembrane protein 132A precursor | R.SPLSDSILGEQALAVTDDKVSLELR.V | 3 | 6.44 | 0.55 | -4.87 |
| IPI00301865 | Isoform 1 of Transmembrane protein 132A precursor | R.SPLSDSILGEQALAVTDDKVSLELR.V | 4 | 5.10 | 0.36 | -4.54 |
| IPI00301865 | Isoform 1 of Transmembrane protein 132A precursor | R.VPDM*PVRPGQLFSATLLLR.H      | 3 | 3.55 | 0.47 | -2.28 |
| IPI00301865 | Isoform 1 of Transmembrane protein 132A precursor | R.VPGPAEGPAEPAAEASDEAER.R     | 2 | 5.56 | 0.59 | -3.59 |
| IPI00301865 | Isoform 1 of Transmembrane protein 132A precursor | R.VPGPAEGPAEPAAEASDEAER.R     | 3 | 4.14 | 0.23 | -3.52 |
| IPI00301865 | Isoform 1 of Transmembrane protein 132A precursor | R.VPGPAEGPAEPAAEASDEAERR.A    | 3 | 3.60 | 0.54 | -2.54 |
| IPI00301865 | Isoform 1 of Transmembrane protein 132A precursor | R.VQPVM*GISLTLR.G             | 2 | 3.85 | 0.45 | -3.80 |

|             |                                                                                  |                                         |   |      |      |       |
|-------------|----------------------------------------------------------------------------------|-----------------------------------------|---|------|------|-------|
| IPI00301865 | Isoform 1 of Transmembrane protein 132A precursor                                | R.VVVGREPGVTSIEVR.S                     | 2 | 3.40 | 0.32 | -2.59 |
| IPI00301865 | Isoform 1 of Transmembrane protein 132A precursor                                | R.VVVGREPGVTSIEVR.S                     | 3 | 3.42 | 0.44 | -3.06 |
| IPI00301923 | Isoform 1 of Cell division protein kinase 9                                      | K.LELVKGQKRKVK.D                        | 2 | 2.33 | 0.15 |       |
| IPI00301961 | Neuroendocrine convertase 1 precursor                                            | K.LNIPYENFYEALEK.L                      | 2 | 4.15 | 0.44 | -4.66 |
| IPI00301961 | Neuroendocrine convertase 1 precursor                                            | P.EAASAI AEELGYDLLGQIGSLENHYLFK.H       | 3 | 4.53 | 0.46 | -4.68 |
| IPI00301961 | Neuroendocrine convertase 1 precursor                                            | R.DDRLLQALVDILNEEN.-                    | 2 | 4.14 | 0.39 | -2.22 |
| IPI00301961 | Neuroendocrine convertase 1 precursor                                            | R.DELEEGAPSQAM*LR.L                     | 2 | 4.21 | 0.41 | -3.40 |
| IPI00301961 | Neuroendocrine convertase 1 precursor                                            | R.DELEEGAPSQAM*LR.L                     | 3 | 2.38 | 0.13 | -0.49 |
| IPI00301961 | Neuroendocrine convertase 1 precursor                                            | R.LLQALVDILNEEN.-                       | 2 | 3.94 | 0.35 |       |
| IPI00301961 | Neuroendocrine convertase 1 precursor                                            | R.RDELEEGAPSQAM*LR.L                    | 2 | 2.80 | 0.22 | -3.02 |
| IPI00301961 | Neuroendocrine convertase 1 precursor                                            | R.RDELEEGAPSQAM*LR.L                    | 3 | 3.31 | 0.18 | -1.25 |
| IPI00302133 | Transient receptor potential cation channel subfamily V member 5                 | K.LPRCLWPRSGICGCEFLGDRWFLRVENHNDQNPLR.V | 3 | 1.51 | 0.25 | -5.92 |
| IPI00302181 | Isoform 1 of Voltage-dependent calcium channel subunit alpha-2/delta-3 precursor | K.GILLGVGTDVPVKELLK.T                   | 2 | 3.77 | 0.29 | -2.80 |
| IPI00302181 | Isoform 1 of Voltage-dependent calcium channel subunit alpha-2/delta-3 precursor | K.GILLGVGTDVPVKELLK.T                   | 3 | 2.97 | 0.39 | -3.73 |
| IPI00302181 | Isoform 1 of Voltage-dependent calcium channel subunit alpha-2/delta-3 precursor | K.LWASAFGGEIK.S                         | 2 | 3.41 | 0.31 | -2.39 |
| IPI00302181 | Isoform 1 of Voltage-dependent calcium channel subunit alpha-2/delta-3 precursor | K.VFVDNFRDPSLIWQYFGSAK.G                | 2 | 3.78 | 0.49 | -3.46 |
| IPI00302181 | Isoform 1 of Voltage-dependent calcium channel subunit alpha-2/delta-3 precursor | K.VFVDNFRDPSLIWQYFGSAK.G                | 3 | 4.48 | 0.30 | -4.26 |
| IPI00302181 | Isoform 1 of Voltage-dependent calcium channel subunit alpha-2/delta-3 precursor | K.YSGSLLQK.K                            | 2 | 3.10 | 0.26 | -0.47 |
| IPI00302181 | Isoform 1 of Voltage-dependent calcium channel subunit alpha-2/delta-3 precursor | R.EHLDKLFKA.G                           | 2 | 1.96 | 0.13 | -2.84 |
| IPI00302181 | Isoform 1 of Voltage-dependent calcium channel subunit alpha-2/delta-3 precursor | R.HLSQLEAIK.L                           | 2 | 1.68 | 0.08 | -2.33 |
| IPI00302181 | Isoform 1 of Voltage-dependent calcium channel subunit alpha-2/delta-3 precursor | R.IFTYLIGR.E                            | 2 | 2.96 | 0.22 | -1.51 |
| IPI00302181 | Isoform 1 of Voltage-dependent calcium channel subunit alpha-2/delta-3 precursor | R.INLFGAEQLTNQDFLK.A                    | 2 | 5.72 | 0.53 | -4.17 |
| IPI00302181 | Isoform 1 of Voltage-dependent calcium channel subunit alpha-2/delta-3 precursor | R.INLFGAEQLTNQDFLK.A                    | 3 | 4.61 | 0.33 | -2.69 |
| IPI00302181 | Isoform 1 of Voltage-dependent calcium channel subunit alpha-2/delta-3 precursor | R.KSPVVAAVGIQM*K.L                      | 2 | 3.53 | 0.49 | -2.60 |
| IPI00302181 | Isoform 1 of Voltage-dependent calcium channel subunit alpha-2/delta-3 precursor | R.SKGILLGVGTDVPVKELLK.T                 | 3 | 3.46 | 0.35 | -4.80 |

|             |                                                                                  |                                    |   |      |      |       |
|-------------|----------------------------------------------------------------------------------|------------------------------------|---|------|------|-------|
| IPI00302181 | Isoform 1 of Voltage-dependent calcium channel subunit alpha-2/delta-3 precursor | R.VLVM*TNDYYTDIK.G                 | 2 | 4.26 | 0.42 | -3.63 |
| IPI00302592 | filamin A, alpha isoform 1                                                       | K.AGVAPLQVK.V                      | 2 | 2.41 | 0.07 | -3.26 |
| IPI00302592 | filamin A, alpha isoform 1                                                       | K.DAGEGGLSLAIEGPSK.A               | 2 | 3.80 | 0.32 | -3.73 |
| IPI00302592 | filamin A, alpha isoform 1                                                       | K.FNEEHIPDSPFVVPVASPSGDAR.R        | 3 | 3.28 | 0.23 | -4.37 |
| IPI00302592 | filamin A, alpha isoform 1                                                       | K.GLVEPVDVVDNADGTQTVNYVPSR.E       | 3 | 2.70 | 0.15 | -4.14 |
| IPI00302592 | filamin A, alpha isoform 1                                                       | K.VTAQGPGLPSGNIANK.T               | 2 | 3.60 | 0.47 | -1.49 |
| IPI00302592 | filamin A, alpha isoform 1                                                       | R.AGQSAAGAAPGGGVDR.D               | 2 | 4.08 | 0.41 | -3.25 |
| IPI00302592 | filamin A, alpha isoform 1                                                       | R.EATTEFSVDAR.A                    | 2 | 2.73 | 0.38 | -2.88 |
| IPI00302592 | filamin A, alpha isoform 1                                                       | R.QMQLENVSVALEFLDRESIK.L           | 3 | 2.96 | 0.24 | -3.88 |
| IPI00302641 | Protocadherin Fat 2 precursor                                                    | K.ALDREQASSYSLK.L                  | 2 | 2.88 | 0.10 |       |
| IPI00302641 | Protocadherin Fat 2 precursor                                                    | K.ATDSGQPPLSASVR.L                 | 2 | 2.69 | 0.12 |       |
| IPI00302641 | Protocadherin Fat 2 precursor                                                    | K.AVAAQDPVIYSLVR.G                 | 2 | 3.97 | 0.30 |       |
| IPI00302641 | Protocadherin Fat 2 precursor                                                    | K.EM*EHSVGVQM*R.S                  | 2 | 2.31 | 0.39 | -3.46 |
| IPI00302641 | Protocadherin Fat 2 precursor                                                    | K.FSEPLYTFSAPEDLPEGSEIGVK.A        | 2 | 3.20 | 0.25 |       |
| IPI00302641 | Protocadherin Fat 2 precursor                                                    | K.FSEPLYTFSAPEDLPEGSEIGVK.A        | 3 | 3.60 | 0.21 | -3.56 |
| IPI00302641 | Protocadherin Fat 2 precursor                                                    | K.IIAAQLPR.G                       | 2 | 3.14 | 0.21 | -1.97 |
| IPI00302641 | Protocadherin Fat 2 precursor                                                    | K.IILTDENDNPPQFK.A                 | 2 | 2.77 | 0.32 | -2.45 |
| IPI00302641 | Protocadherin Fat 2 precursor                                                    | K.LDQANHAPHTLTVK.A                 | 3 | 2.75 | 0.34 | -2.62 |
| IPI00302641 | Protocadherin Fat 2 precursor                                                    | K.SLIYIHGSQDPGSASLFQLDPSSGVLTVGK.L | 3 | 4.40 | 0.20 |       |
| IPI00302641 | Protocadherin Fat 2 precursor                                                    | K.SNPLFQSPYYK.V                    | 2 | 3.27 | 0.30 | -2.47 |
| IPI00302641 | Protocadherin Fat 2 precursor                                                    | K.TGNADEAVTHPVTGSISVLNPAFLGLSR.K   | 3 | 5.83 | 0.47 | -2.55 |
| IPI00302641 | Protocadherin Fat 2 precursor                                                    | K.TLDADISEQNR.Q                    | 2 | 3.11 | 0.33 | -3.20 |
| IPI00302641 | Protocadherin Fat 2 precursor                                                    | K.TPVAVVFAR.D                      | 2 | 3.25 | 0.27 | -1.74 |
| IPI00302641 | Protocadherin Fat 2 precursor                                                    | K.VLQLILSDPDPSPENGGPPYSFR.I        | 2 | 3.60 | 0.24 |       |
| IPI00302641 | Protocadherin Fat 2 precursor                                                    | K.VLQLILSDPDPSPENGGPPYSFR.I        | 3 | 3.80 | 0.46 | -3.11 |
| IPI00302641 | Protocadherin Fat 2 precursor                                                    | R.DVSYQIVEDGSDVSK.F                | 2 | 5.04 | 0.36 |       |
| IPI00302641 | Protocadherin Fat 2 precursor                                                    | R.FSGQSYVR.Y                       | 1 | 2.18 | 0.23 | -3.34 |
| IPI00302641 | Protocadherin Fat 2 precursor                                                    | R.FSGQSYVR.Y                       | 2 | 2.49 | 0.21 | -1.32 |
| IPI00302641 | Protocadherin Fat 2 precursor                                                    | R.FTQLHYEASVPDTIAPGTELLQVR.A       | 3 | 4.01 | 0.29 | -2.43 |
| IPI00302641 | Protocadherin Fat 2 precursor                                                    | R.GTTPESNKDGVFSLDPDTGVIK.V         | 3 | 3.55 | 0.10 | -3.34 |
| IPI00302641 | Protocadherin Fat 2 precursor                                                    | R.HFSVGAPDGK.I                     | 2 | 2.99 | 0.33 | -1.61 |
| IPI00302641 | Protocadherin Fat 2 precursor                                                    | R.LAATDPDAGFNGK.L                  | 2 | 3.22 | 0.37 | -3.40 |
| IPI00302641 | Protocadherin Fat 2 precursor                                                    | R.LEKPLQVRPQAPLELTVR.A             | 4 | 3.17 | 0.24 | -2.57 |
| IPI00302641 | Protocadherin Fat 2 precursor                                                    | R.LIYNIVIEEEPLM*LFTTDFK.T          | 2 | 6.20 | 0.42 |       |
| IPI00302641 | Protocadherin Fat 2 precursor                                                    | R.LIYNIVIEEEPLM*LFTTDFK.T          | 3 | 4.94 | 0.46 | -5.76 |
| IPI00302641 | Protocadherin Fat 2 precursor                                                    | R.LKVPEDLPPGTVLFLDASDPDLGPAGEVR.Y  | 3 | 4.48 | 0.42 | -4.58 |
| IPI00302641 | Protocadherin Fat 2 precursor                                                    | R.LSILTPR.H                        | 2 | 2.09 | 0.06 | -3.84 |
| IPI00302641 | Protocadherin Fat 2 precursor                                                    | R.LSPVSPGPVYR.L                    | 2 | 2.21 | 0.19 | -0.61 |
| IPI00302641 | Protocadherin Fat 2 precursor                                                    | R.SCQADITLHVEDVNDNAPR.F            | 2 | 3.05 | 0.20 |       |
| IPI00302641 | Protocadherin Fat 2 precursor                                                    | R.SGSGPYFYSQIR.G                   | 2 | 3.27 | 0.36 | -3.10 |
| IPI00302641 | Protocadherin Fat 2 precursor                                                    | R.SNEFSLVSVK.D                     | 2 | 2.05 | 0.18 | -2.04 |

|             |                                                      |                                         |   |      |      |       |
|-------------|------------------------------------------------------|-----------------------------------------|---|------|------|-------|
| IPI00302641 | Protocadherin Fat 2 precursor                        | R.VGASDGVFR.A                           | 2 | 2.90 | 0.13 | -2.46 |
| IPI00302641 | Protocadherin Fat 2 precursor                        | R.VHVTEQSHYAPSALPLEIFITVGEDEFQGGM*VGK.I | 4 | 2.95 | 0.11 | -3.39 |
| IPI00302641 | Protocadherin Fat 2 precursor                        | R.VQAIQDKGK.S                           | 2 | 2.23 | 0.08 | -1.04 |
| IPI00302641 | Protocadherin Fat 2 precursor                        | R.VQLSEFSPPGSR.V                        | 2 | 2.63 | 0.09 |       |
| IPI00302641 | Protocadherin Fat 2 precursor                        | R.VVVGILDVNDNPPIFSHK.L                  | 3 | 2.57 | 0.34 | -2.95 |
| IPI00302641 | Protocadherin Fat 2 precursor                        | R.VVHILDQNDLKPLFSPPSYR.V                | 3 | 3.11 | 0.13 |       |
| IPI00302840 | Sodium/potassium-transporting ATPase subunit alpha-3 | K.GFAFDCDDVNFTTDNLFCVGLMSMIDPPR.A       | 3 | 2.87 | 0.32 | -2.44 |
| IPI00302840 | Sodium/potassium-transporting ATPase subunit alpha-3 | K.MQVNAEEVVVGDLEIK.G                    | 2 | 4.74 | 0.41 | -2.53 |
| IPI00302840 | Sodium/potassium-transporting ATPase subunit alpha-3 | K.MQVNAEEVVVGDLEIK.G                    | 3 | 3.31 | 0.06 | -1.26 |
| IPI00302840 | Sodium/potassium-transporting ATPase subunit alpha-3 | K.QAADMILLDDNFASIVTGVVEEGR.L            | 2 | 5.62 | 0.61 | -2.21 |
| IPI00302840 | Sodium/potassium-transporting ATPase subunit alpha-3 | K.QAADMILLDDNFASIVTGVVEEGR.L            | 3 | 4.80 | 0.48 | -1.61 |
| IPI00302840 | Sodium/potassium-transporting ATPase subunit alpha-3 | K.VDNSSLTGESEPQTR.S                     | 2 | 4.55 | 0.40 | -2.59 |
| IPI00302840 | Sodium/potassium-transporting ATPase subunit alpha-3 | R.LNIPVSQVNPR.D                         | 2 | 2.30 | 0.13 | -1.37 |
| IPI00302850 | Small nuclear ribonucleoprotein Sm D1                | R.YFILPDSLPLDTLLVDVEPK.V                | 2 | 3.17 | 0.26 |       |
| IPI00302944 | Isoform 4 of Collagen alpha-1(XII) chain precursor   | K.ALALGALQNIR.Y                         | 2 | 3.44 | 0.23 | -1.05 |
| IPI00302944 | Isoform 4 of Collagen alpha-1(XII) chain precursor   | K.GGNTLTGM*ALNFIR.Q                     | 2 | 3.18 | 0.33 | -4.96 |
| IPI00302944 | Isoform 4 of Collagen alpha-1(XII) chain precursor   | K.VLVVVTDGR.S                           | 2 | 2.80 | 0.22 | -2.40 |
| IPI00302944 | Isoform 4 of Collagen alpha-1(XII) chain precursor   | R.VFGETTNSLSVAWDHADGPVQQYR.I            | 3 | 2.53 | 0.18 | -0.12 |
| IPI00302962 | Amphiphysin I variant CT4 (Fragment)                 | K.IGTETTEGAESAQPEAELEATVPQEK.V          | 3 | 3.44 | 0.34 | -2.86 |
| IPI00303071 | Cat eye syndrome critical region protein 1 precursor | K.FVETHPEFIGIK.I                        | 2 | 3.36 | 0.32 | -5.75 |
| IPI00303071 | Cat eye syndrome critical region protein 1 precursor | K.IIYSDHR.S                             | 2 | 1.82 | 0.11 | -3.59 |
| IPI00303071 | Cat eye syndrome critical region protein 1 precursor | K.TYQEVAQK.F                            | 2 | 1.85 | 0.08 | -0.84 |
| IPI00303071 | Cat eye syndrome critical region protein 1 precursor | K.WILLEDYR.K                            | 2 | 3.63 | 0.24 | -2.79 |
| IPI00303071 | Cat eye syndrome critical region protein 1 precursor | R.FAHPTPRPSEK.C                         | 2 | 1.91 | 0.07 | -3.63 |
| IPI00303071 | Cat eye syndrome critical region protein 1 precursor | R.IGHGFALSK.H                           | 1 | 2.15 | 0.26 | -3.61 |
| IPI00303071 | Cat eye syndrome critical region protein 1 precursor | R.IGHGFALSK.H                           | 2 | 2.70 | 0.18 | -3.10 |
| IPI00303071 | Cat eye syndrome critical region protein 1 precursor | R.LVLNNTKEELANER.L                      | 3 | 3.46 | 0.32 | -3.21 |

|             |                                                                                         |                          |   |      |      |       |
|-------------|-----------------------------------------------------------------------------------------|--------------------------|---|------|------|-------|
| IPI00303071 | Cat eye syndrome critical region protein 1 precursor                                    | R.SKDVAVIAESIR.M         | 2 | 3.89 | 0.40 | -3.58 |
| IPI00303071 | Cat eye syndrome critical region protein 1 precursor                                    | R.SKDVAVIAESIR.M         | 3 | 3.54 | 0.05 | -3.09 |
| IPI00303071 | Cat eye syndrome critical region protein 1 precursor                                    | R.SQVFNILR.M             | 2 | 1.93 | 0.09 | -0.43 |
| IPI00303161 | Endothelial cell-selective adhesion molecule precursor                                  | K.DSGPYSCSVNVQDK.Q       | 2 | 4.03 | 0.40 | -4.51 |
| IPI00303161 | Endothelial cell-selective adhesion molecule precursor                                  | R.QLPSFQTFAPALDVIR.G     | 2 | 5.72 | 0.52 | -4.59 |
| IPI00303161 | Endothelial cell-selective adhesion molecule precursor                                  | R.QLPSFQTFAPALDVIR.G     | 3 | 4.31 | 0.39 | -3.63 |
| IPI00303210 | Isoform 2 of Ectonucleotide pyrophosphatase/phosphodiesterase family member 2 precursor | C.PAGFVRPPLIIFSVDGFR.A   | 3 | 3.90 | 0.36 | -4.42 |
| IPI00303210 | Isoform 2 of Ectonucleotide pyrophosphatase/phosphodiesterase family member 2 precursor | F.DYDYDGLHDTEDKIK.Q      | 2 | 3.46 | 0.44 | -1.88 |
| IPI00303210 | Isoform 2 of Ectonucleotide pyrophosphatase/phosphodiesterase family member 2 precursor | F.LSNYLTNVDDITLVPGLGR.I  | 2 | 3.89 | 0.48 | -2.95 |
| IPI00303210 | Isoform 2 of Ectonucleotide pyrophosphatase/phosphodiesterase family member 2 precursor | I.DKIVGQLM*DGLK.Q        | 2 | 2.98 | 0.32 | -1.95 |
| IPI00303210 | Isoform 2 of Ectonucleotide pyrophosphatase/phosphodiesterase family member 2 precursor | I.FDYDYDGLHDTEDKIK.Q     | 2 | 3.44 | 0.37 | -5.92 |
| IPI00303210 | Isoform 2 of Ectonucleotide pyrophosphatase/phosphodiesterase family member 2 precursor | K.AAECFVRFVPLIIFSVDGFR.A | 2 | 3.41 | 0.48 | -3.20 |
| IPI00303210 | Isoform 2 of Ectonucleotide pyrophosphatase/phosphodiesterase family member 2 precursor | K.AAECFVRFVPLIIFSVDGFR.A | 3 | 5.07 | 0.54 | -6.71 |
| IPI00303210 | Isoform 2 of Ectonucleotide pyrophosphatase/phosphodiesterase family member 2 precursor | K.AGTFVSVVIPHER.R        | 2 | 3.88 | 0.50 | -4.30 |
| IPI00303210 | Isoform 2 of Ectonucleotide pyrophosphatase/phosphodiesterase family member 2 precursor | K.AGTFVSVVIPHER.R        | 3 | 3.64 | 0.38 | -3.43 |
| IPI00303210 | Isoform 2 of Ectonucleotide pyrophosphatase/phosphodiesterase family member 2 precursor | K.AGTFVSVVIPHER.I        | 3 | 2.36 | 0.24 | -5.42 |

|             |                                                                                         |                                    |   |      |      |       |
|-------------|-----------------------------------------------------------------------------------------|------------------------------------|---|------|------|-------|
| IPI00303210 | Isoform 2 of Ectonucleotide pyrophosphatase/phosphodiesterase family member 2 precursor | K.CFFQGDHGFDNK.V                   | 2 | 3.96 | 0.46 | -2.89 |
| IPI00303210 | Isoform 2 of Ectonucleotide pyrophosphatase/phosphodiesterase family member 2 precursor | K.CFFQGDHGFDNKVNNSM*QTVFVGYGPTFK.Y | 3 | 3.99 | 0.37 | -3.45 |
| IPI00303210 | Isoform 2 of Ectonucleotide pyrophosphatase/phosphodiesterase family member 2 precursor | K.CFFQGDHGFDNKVNNSM*QTVFVGYGPTFK.Y | 4 | 3.01 | 0.15 | -4.96 |
| IPI00303210 | Isoform 2 of Ectonucleotide pyrophosphatase/phosphodiesterase family member 2 precursor | K.IVGQLM*DGLK.Q                    | 1 | 1.92 | 0.16 | -4.37 |
| IPI00303210 | Isoform 2 of Ectonucleotide pyrophosphatase/phosphodiesterase family member 2 precursor | K.IVGQLM*DGLK.Q                    | 2 | 3.43 | 0.36 | -3.09 |
| IPI00303210 | Isoform 2 of Ectonucleotide pyrophosphatase/phosphodiesterase family member 2 precursor | K.KPDQHFKPYLK.Q                    | 2 | 3.78 | 0.19 | -4.92 |
| IPI00303210 | Isoform 2 of Ectonucleotide pyrophosphatase/phosphodiesterase family member 2 precursor | K.KPDQHFKPYLK.Q                    | 3 | 2.76 | 0.20 | -4.13 |
| IPI00303210 | Isoform 2 of Ectonucleotide pyrophosphatase/phosphodiesterase family member 2 precursor | K.NDKQM*SYGFLFPPYLSSSPEAK.Y        | 2 | 5.27 | 0.57 | -4.39 |
| IPI00303210 | Isoform 2 of Ectonucleotide pyrophosphatase/phosphodiesterase family member 2 precursor | K.NDKQM*SYGFLFPPYLSSSPEAK.Y        | 3 | 4.41 | 0.46 | -3.41 |
| IPI00303210 | Isoform 2 of Ectonucleotide pyrophosphatase/phosphodiesterase family member 2 precursor | K.NKLDELNKR.L                      | 2 | 2.97 | 0.13 | -3.10 |
| IPI00303210 | Isoform 2 of Ectonucleotide pyrophosphatase/phosphodiesterase family member 2 precursor | K.QAEVSSVPDHLTSCVRPDVR.V           | 2 | 2.45 | 0.18 | -3.52 |
| IPI00303210 | Isoform 2 of Ectonucleotide pyrophosphatase/phosphodiesterase family member 2 precursor | K.QGVKAGTFFWSVIPHER.R              | 4 | 3.38 | 0.24 | -2.10 |
| IPI00303210 | Isoform 2 of Ectonucleotide pyrophosphatase/phosphodiesterase family member 2 precursor | K.QM*SYGFLFPPYLSSSPEAK.Y           | 2 | 4.95 | 0.54 | -4.82 |
| IPI00303210 | Isoform 2 of Ectonucleotide pyrophosphatase/phosphodiesterase family member 2 precursor | K.QM*SYGFLFPPYLSSSPEAK.Y           | 3 | 3.71 | 0.15 | -4.41 |



|             |                                                                                         |                                          |   |      |      |       |
|-------------|-----------------------------------------------------------------------------------------|------------------------------------------|---|------|------|-------|
| IPI00303210 | Isoform 2 of Ectonucleotide pyrophosphatase/phosphodiesterase family member 2 precursor | K.QYVEGSSIPVPTHYYSIITSCLDFTQPADK.C       | 3 | 4.55 | 0.42 | -4.45 |
| IPI00303210 | Isoform 2 of Ectonucleotide pyrophosphatase/phosphodiesterase family member 2 precursor | K.SYTSCCHDFDELCLK.T                      | 2 | 4.55 | 0.46 | -0.09 |
| IPI00303210 | Isoform 2 of Ectonucleotide pyrophosphatase/phosphodiesterase family member 2 precursor | K.SYTSCCHDFDELCLK.T                      | 3 | 2.16 | 0.22 | -1.69 |
| IPI00303210 | Isoform 2 of Ectonucleotide pyrophosphatase/phosphodiesterase family member 2 precursor | K.TFPNLYTLATGLYPESH.G                    | 2 | 3.51 | 0.35 | -3.72 |
| IPI00303210 | Isoform 2 of Ectonucleotide pyrophosphatase/phosphodiesterase family member 2 precursor | K.TFPNLYTLATGLYPESHGIVGN.S               | 2 | 4.19 | 0.52 | -5.02 |
| IPI00303210 | Isoform 2 of Ectonucleotide pyrophosphatase/phosphodiesterase family member 2 precursor | K.TFPNLYTLATGLYPESHGIVGNM*YDPVDFATFHLR.G | 3 | 5.63 | 0.50 | -3.56 |
| IPI00303210 | Isoform 2 of Ectonucleotide pyrophosphatase/phosphodiesterase family member 2 precursor | K.TFPNLYTLATGLYPESHGIVGNM*YDPVDFATFHLR.G | 4 | 2.73 | 0.42 | -4.05 |
| IPI00303210 | Isoform 2 of Ectonucleotide pyrophosphatase/phosphodiesterase family member 2 precursor | K.TYLHTYESEI.-                           | 1 | 2.74 | 0.38 | -4.10 |
| IPI00303210 | Isoform 2 of Ectonucleotide pyrophosphatase/phosphodiesterase family member 2 precursor | K.TYLHTYESEI.-                           | 2 | 3.08 | 0.36 | -2.57 |
| IPI00303210 | Isoform 2 of Ectonucleotide pyrophosphatase/phosphodiesterase family member 2 precursor | K.VNSM*QTVFVGYGPTFK.Y                    | 2 | 4.57 | 0.51 | -4.65 |
| IPI00303210 | Isoform 2 of Ectonucleotide pyrophosphatase/phosphodiesterase family member 2 precursor | K.YDAFLVTNM*VPM*YPA.F                    | 2 | 4.18 | 0.44 | -1.28 |
| IPI00303210 | Isoform 2 of Ectonucleotide pyrophosphatase/phosphodiesterase family member 2 precursor | K.YDAFLVTNM*VPM*YPAF.K                   | 2 | 4.11 | 0.56 | -3.03 |
| IPI00303210 | Isoform 2 of Ectonucleotide pyrophosphatase/phosphodiesterase family member 2 precursor | K.YDAFLVTNM*VPM*YPAFK.R                  | 2 | 5.18 | 0.54 | -5.59 |
| IPI00303210 | Isoform 2 of Ectonucleotide pyrophosphatase/phosphodiesterase family member 2 precursor | K.YDAFLVTNM*VPM*YPAFK.R                  | 3 | 3.31 | 0.34 | -3.66 |

|             |                                                                                         |                          |   |      |      |       |
|-------------|-----------------------------------------------------------------------------------------|--------------------------|---|------|------|-------|
| IPI00303210 | Isoform 2 of Ectonucleotide pyrophosphatase/phosphodiesterase family member 2 precursor | K.YDAFLVTNM*VPM*YPAFKR.V | 2 | 3.55 | 0.49 | -4.73 |
| IPI00303210 | Isoform 2 of Ectonucleotide pyrophosphatase/phosphodiesterase family member 2 precursor | K.YDAFLVTNM*VPM*YPAFKR.V | 3 | 5.03 | 0.51 | -4.07 |
| IPI00303210 | Isoform 2 of Ectonucleotide pyrophosphatase/phosphodiesterase family member 2 precursor | M.SYGFLPPYLSSSPEAK.Y     | 2 | 3.49 | 0.41 | -5.28 |
| IPI00303210 | Isoform 2 of Ectonucleotide pyrophosphatase/phosphodiesterase family member 2 precursor | R.CFELQEAGPPDCR.C        | 2 | 5.22 | 0.56 | -3.33 |
| IPI00303210 | Isoform 2 of Ectonucleotide pyrophosphatase/phosphodiesterase family member 2 precursor | R.CVNVIFVGDHGM*EDVTCDR.T | 2 | 5.49 | 0.58 | -2.79 |
| IPI00303210 | Isoform 2 of Ectonucleotide pyrophosphatase/phosphodiesterase family member 2 precursor | R.CVNVIFVGDHGM*EDVTCDR.T | 3 | 3.67 | 0.34 | -3.25 |
| IPI00303210 | Isoform 2 of Ectonucleotide pyrophosphatase/phosphodiesterase family member 2 precursor | R.DIEHLTSLDFFR.K         | 1 | 3.49 | 0.53 | -2.14 |
| IPI00303210 | Isoform 2 of Ectonucleotide pyrophosphatase/phosphodiesterase family member 2 precursor | R.DIEHLTSLDFFR.K         | 2 | 4.04 | 0.46 | -5.32 |
| IPI00303210 | Isoform 2 of Ectonucleotide pyrophosphatase/phosphodiesterase family member 2 precursor | R.DIEHLTSLDFFR.K         | 3 | 4.67 | 0.29 | -1.15 |
| IPI00303210 | Isoform 2 of Ectonucleotide pyrophosphatase/phosphodiesterase family member 2 precursor | R.DIEHLTSLDFFR.K.T       | 2 | 3.78 | 0.40 | -3.88 |
| IPI00303210 | Isoform 2 of Ectonucleotide pyrophosphatase/phosphodiesterase family member 2 precursor | R.DIEHLTSLDFFR.K.T       | 3 | 3.52 | 0.40 | -1.84 |
| IPI00303210 | Isoform 2 of Ectonucleotide pyrophosphatase/phosphodiesterase family member 2 precursor | R.DIEHLTSLDFFR.K.T       | 4 | 2.09 | 0.27 | -3.04 |
| IPI00303210 | Isoform 2 of Ectonucleotide pyrophosphatase/phosphodiesterase family member 2 precursor | R.EIDKIVGQLM*DGLK.Q      | 2 | 4.20 | 0.41 | -3.54 |
| IPI00303210 | Isoform 2 of Ectonucleotide pyrophosphatase/phosphodiesterase family member 2 precursor | R.EIDKIVGQLM*DGLK.Q      | 3 | 2.93 | 0.31 | -2.19 |

|             |                                                                                         |                               |   |      |      |       |
|-------------|-----------------------------------------------------------------------------------------|-------------------------------|---|------|------|-------|
| IPI00303210 | Isoform 2 of Ectonucleotide pyrophosphatase/phosphodiesterase family member 2 precursor | R.EIDKIVGQLM*DGLKQLK.L        | 3 | 2.65 | 0.17 | -3.22 |
| IPI00303210 | Isoform 2 of Ectonucleotide pyrophosphatase/phosphodiesterase family member 2 precursor | R.GDCCTNYQVVCK.G              | 2 | 3.61 | 0.41 | -2.75 |
| IPI00303210 | Isoform 2 of Ectonucleotide pyrophosphatase/phosphodiesterase family member 2 precursor | R.IEDIHLLVER.R                | 1 | 2.56 | 0.26 | -2.97 |
| IPI00303210 | Isoform 2 of Ectonucleotide pyrophosphatase/phosphodiesterase family member 2 precursor | R.IEDIHLLVER.R                | 2 | 3.91 | 0.27 | -1.16 |
| IPI00303210 | Isoform 2 of Ectonucleotide pyrophosphatase/phosphodiesterase family member 2 precursor | R.IEDIHLLVER.R                | 3 | 3.76 | 0.32 | -2.93 |
| IPI00303210 | Isoform 2 of Ectonucleotide pyrophosphatase/phosphodiesterase family member 2 precursor | R.KPLDVYK.K                   | 1 | 2.48 | 0.15 | -2.51 |
| IPI00303210 | Isoform 2 of Ectonucleotide pyrophosphatase/phosphodiesterase family member 2 precursor | R.KPLDVYK.K                   | 2 | 2.76 | 0.11 | -2.47 |
| IPI00303210 | Isoform 2 of Ectonucleotide pyrophosphatase/phosphodiesterase family member 2 precursor | R.KPLDVYKKPSGK.C              | 2 | 3.36 | 0.41 | -3.88 |
| IPI00303210 | Isoform 2 of Ectonucleotide pyrophosphatase/phosphodiesterase family member 2 precursor | R.NGVNVISGPIFYDYDGLHDTEDK.I   | 2 | 5.15 | 0.56 | -3.76 |
| IPI00303210 | Isoform 2 of Ectonucleotide pyrophosphatase/phosphodiesterase family member 2 precursor | R.NGVNVISGPIFYDYDGLHDTEDK.I   | 3 | 3.48 | 0.25 | -5.19 |
| IPI00303210 | Isoform 2 of Ectonucleotide pyrophosphatase/phosphodiesterase family member 2 precursor | R.NGVNVISGPIFYDYDGLHDTEDKIK.Q | 2 | 4.95 | 0.52 | -6.73 |
| IPI00303210 | Isoform 2 of Ectonucleotide pyrophosphatase/phosphodiesterase family member 2 precursor | R.NGVNVISGPIFYDYDGLHDTEDKIK.Q | 3 | 4.82 | 0.49 | -4.02 |
| IPI00303210 | Isoform 2 of Ectonucleotide pyrophosphatase/phosphodiesterase family member 2 precursor | R.NGVNVISGPIFYDYDGLHDTEDKIK.Q | 4 | 4.22 | 0.33 | -4.38 |
| IPI00303210 | Isoform 2 of Ectonucleotide pyrophosphatase/phosphodiesterase family member 2 precursor | R.RIEDIHLLVER.R               | 1 | 2.06 | 0.22 | -3.60 |

|             |                                                                                         |                                                |   |      |      |       |
|-------------|-----------------------------------------------------------------------------------------|------------------------------------------------|---|------|------|-------|
| IPI00303210 | Isoform 2 of Ectonucleotide pyrophosphatase/phosphodiesterase family member 2 precursor | R.RIEDIHLVER.R                                 | 2 | 3.83 | 0.34 | -4.33 |
| IPI00303210 | Isoform 2 of Ectonucleotide pyrophosphatase/phosphodiesterase family member 2 precursor | R.RIEDIHLVER.R                                 | 3 | 2.87 | 0.25 | -2.87 |
| IPI00303210 | Isoform 2 of Ectonucleotide pyrophosphatase/phosphodiesterase family member 2 precursor | R.RIEDIHLVERR.W                                | 2 | 2.64 | 0.25 | -4.85 |
| IPI00303210 | Isoform 2 of Ectonucleotide pyrophosphatase/phosphodiesterase family member 2 precursor | R.SYPEILTK.T                                   | 2 | 2.48 | 0.10 | -2.75 |
| IPI00303210 | Isoform 2 of Ectonucleotide pyrophosphatase/phosphodiesterase family member 2 precursor | R.TEFLSNYLTNVDDITLVPGLGR.I                     | 2 | 4.76 | 0.50 | -5.12 |
| IPI00303210 | Isoform 2 of Ectonucleotide pyrophosphatase/phosphodiesterase family member 2 precursor | R.TEFLSNYLTNVDDITLVPGLGR.I                     | 3 | 4.27 | 0.42 | -3.30 |
| IPI00303210 | Isoform 2 of Ectonucleotide pyrophosphatase/phosphodiesterase family member 2 precursor | R.TEFLSNYLTNVDDITLVPGLGR.I                     | 4 | 3.41 | 0.24 | -4.35 |
| IPI00303210 | Isoform 2 of Ectonucleotide pyrophosphatase/phosphodiesterase family member 2 precursor | R.TNTFRPTM*PEEVTRPNYPGIM*YMQSDFDLGCTCDDKVEPK.N | 4 | 3.52 | 0.18 | -3.53 |
| IPI00303210 | Isoform 2 of Ectonucleotide pyrophosphatase/phosphodiesterase family member 2 precursor | R.TNTFRPTM*PEEVTRPNYPGIM*YMQSDFDLGCTCDDKVEPK.N | 5 | 4.96 | 0.39 | -0.26 |
| IPI00303210 | Isoform 2 of Ectonucleotide pyrophosphatase/phosphodiesterase family member 2 precursor | R.VRDIEHLTSLDFFR.K                             | 2 | 4.23 | 0.45 | -5.60 |
| IPI00303210 | Isoform 2 of Ectonucleotide pyrophosphatase/phosphodiesterase family member 2 precursor | R.VRDIEHLTSLDFFR.K                             | 3 | 3.93 | 0.47 | -5.61 |
| IPI00303210 | Isoform 2 of Ectonucleotide pyrophosphatase/phosphodiesterase family member 2 precursor | R.VRDIEHLTSLDFFR.K                             | 4 | 3.05 | 0.18 | -4.53 |
| IPI00303210 | Isoform 2 of Ectonucleotide pyrophosphatase/phosphodiesterase family member 2 precursor | R.VRDIEHLTSLDFFRK.T                            | 2 | 2.77 | 0.32 | -5.23 |
| IPI00303210 | Isoform 2 of Ectonucleotide pyrophosphatase/phosphodiesterase family member 2 precursor | R.VRDIEHLTSLDFFRK.T                            | 3 | 4.98 | 0.47 | -4.38 |

|             |                                                                                         |                                  |   |      |      |       |
|-------------|-----------------------------------------------------------------------------------------|----------------------------------|---|------|------|-------|
| IPI00303210 | Isoform 2 of Ectonucleotide pyrophosphatase/phosphodiesterase family member 2 precursor | R.VRDIEHLTSLDFFRK.T              | 4 | 4.25 | 0.44 | -5.05 |
| IPI00303210 | Isoform 2 of Ectonucleotide pyrophosphatase/phosphodiesterase family member 2 precursor | R.VSPSFSQNCLAYK.N                | 1 | 1.90 | 0.33 | 1.67  |
| IPI00303210 | Isoform 2 of Ectonucleotide pyrophosphatase/phosphodiesterase family member 2 precursor | R.VSPSFSQNCLAYK.N                | 2 | 4.15 | 0.47 | -2.45 |
| IPI00303210 | Isoform 2 of Ectonucleotide pyrophosphatase/phosphodiesterase family member 2 precursor | R.VSPSFSQNCLAYKNDK.Q             | 2 | 4.72 | 0.41 | -4.90 |
| IPI00303210 | Isoform 2 of Ectonucleotide pyrophosphatase/phosphodiesterase family member 2 precursor | R.VWNYFQR.V                      | 1 | 2.16 | 0.18 | -1.43 |
| IPI00303210 | Isoform 2 of Ectonucleotide pyrophosphatase/phosphodiesterase family member 2 precursor | R.VWNYFQR.V                      | 2 | 2.26 | 0.08 | -0.39 |
| IPI00303210 | Isoform 2 of Ectonucleotide pyrophosphatase/phosphodiesterase family member 2 precursor | R.WWGGQPLWITATK.Q                | 1 | 2.38 | 0.42 | -2.22 |
| IPI00303210 | Isoform 2 of Ectonucleotide pyrophosphatase/phosphodiesterase family member 2 precursor | R.WWGGQPLWITATK.Q                | 2 | 4.32 | 0.46 | -3.60 |
| IPI00303210 | Isoform 2 of Ectonucleotide pyrophosphatase/phosphodiesterase family member 2 precursor | R.WWGGQPLWITATK.Q                | 3 | 2.44 | 0.11 | -1.72 |
| IPI00303210 | Isoform 2 of Ectonucleotide pyrophosphatase/phosphodiesterase family member 2 precursor | V.RDIEHLTSLDFFR.K                | 2 | 2.98 | 0.25 | -2.44 |
| IPI00303210 | Isoform 2 of Ectonucleotide pyrophosphatase/phosphodiesterase family member 2 precursor | Y.GFLFPPYLSSSPEAK.Y              | 2 | 3.22 | 0.38 | -2.53 |
| IPI00303318 | Protein FAM49B                                                                          | K.DAEGILEDLQSYR.G                | 2 | 3.66 | 0.40 | -4.56 |
| IPI00303476 | ATP synthase subunit beta, mitochondrial precursor                                      | K.SLQDIIAILGMDELSEEDKLTVSR.A     | 2 | 4.74 | 0.52 | -1.94 |
| IPI00303476 | ATP synthase subunit beta, mitochondrial precursor                                      | K.SLQDIIAILGMDELSEEDKLTVSR.A     | 3 | 4.59 | 0.48 | -3.83 |
| IPI00303476 | ATP synthase subunit beta, mitochondrial precursor                                      | K.VLDSGAPIKIPVGPETLGR.I          | 3 | 4.19 | 0.35 | -1.93 |
| IPI00303476 | ATP synthase subunit beta, mitochondrial precursor                                      | R.VALTGLTVAEYFRDQEQDVLFFIDNIFR.F | 3 | 3.11 | 0.32 | -2.56 |

|             |                                                             |                                   |   |      |      |       |
|-------------|-------------------------------------------------------------|-----------------------------------|---|------|------|-------|
| IPI00303882 | Isoform B of Mannose-6-phosphate receptor-binding protein 1 | K.VSGAQEM*VSSAK.D                 | 2 | 3.31 | 0.25 | -5.09 |
| IPI00303894 | Protein FAM3A precursor                                     | K.LFSELGSR.N                      | 2 | 2.65 | 0.05 | -1.85 |
| IPI00303894 | Protein FAM3A precursor                                     | K.SPFEQHVK.N                      | 2 | 2.66 | 0.26 | 0.09  |
| IPI00303894 | Protein FAM3A precursor                                     | R.DSWVFGAK.G                      | 2 | 2.25 | 0.14 | -1.11 |
| IPI00303894 | Protein FAM3A precursor                                     | R.KLFSELGSR.N                     | 2 | 2.14 | 0.15 | -2.07 |
| IPI00303894 | Protein FAM3A precursor                                     | R.VVSGAANVIGPK.I                  | 2 | 2.77 | 0.39 | -0.81 |
| IPI00303894 | Protein FAM3A precursor                                     | S.ILLGGPGSGFPR.I                  | 2 | 3.11 | 0.16 | -2.03 |
| IPI00303963 | Complement C2 precursor (Fragment)                          | K.ALHQVFEHM*LDVSK.L               | 2 | 3.97 | 0.50 | -2.79 |
| IPI00303963 | Complement C2 precursor (Fragment)                          | K.ALHQVFEHM*LDVSK.L               | 3 | 2.70 | 0.39 | -1.85 |
| IPI00303963 | Complement C2 precursor (Fragment)                          | K.ALHQVFEHM*LDVSK.L               | 4 | 3.20 | 0.24 | -2.05 |
| IPI00303963 | Complement C2 precursor (Fragment)                          | K.AVISPGFDVFAK.K                  | 1 | 3.10 | 0.30 | -4.10 |
| IPI00303963 | Complement C2 precursor (Fragment)                          | K.AVISPGFDVFAK.K                  | 2 | 3.11 | 0.42 | -3.93 |
| IPI00303963 | Complement C2 precursor (Fragment)                          | K.AVISPGFDVFAK.N                  | 2 | 2.67 | 0.21 | -2.74 |
| IPI00303963 | Complement C2 precursor (Fragment)                          | K.AVISPGFDVFAK.N                  | 3 | 2.17 | 0.18 | -1.80 |
| IPI00303963 | Complement C2 precursor (Fragment)                          | K.ESASLM*VDR.I                    | 2 | 2.21 | 0.20 | -3.64 |
| IPI00303963 | Complement C2 precursor (Fragment)                          | K.KNQGILEFYGDIALK.L               | 2 | 5.38 | 0.46 | -3.44 |
| IPI00303963 | Complement C2 precursor (Fragment)                          | K.KNQGILEFYGDIALK.L               | 3 | 4.47 | 0.41 | -4.49 |
| IPI00303963 | Complement C2 precursor (Fragment)                          | K.NQGILEFYGDIALK.L                | 2 | 6.22 | 0.47 | -7.46 |
| IPI00303963 | Complement C2 precursor (Fragment)                          | K.RNDYLDIYAIGVGK.L                | 2 | 4.41 | 0.50 | -3.67 |
| IPI00303963 | Complement C2 precursor (Fragment)                          | K.RNDYLDIYAIGVGK.L                | 3 | 4.36 | 0.37 | -1.52 |
| IPI00303963 | Complement C2 precursor (Fragment)                          | K.TAVDHIRE                        | 2 | 2.37 | 0.29 | -4.32 |
| IPI00303963 | Complement C2 precursor (Fragment)                          | K.TAVDHIREILNINQK.R               | 2 | 3.66 | 0.23 | -2.60 |
| IPI00303963 | Complement C2 precursor (Fragment)                          | K.VLM*SVLNDNSR.D                  | 2 | 3.77 | 0.36 | -3.22 |
| IPI00303963 | Complement C2 precursor (Fragment)                          | K.VPPPRDFHINLFR.M                 | 2 | 2.34 | 0.14 | -3.80 |
| IPI00303963 | Complement C2 precursor (Fragment)                          | K.VPPPRDFHINLFR.M                 | 3 | 1.99 | 0.10 | -3.31 |
| IPI00303963 | Complement C2 precursor (Fragment)                          | R.CPAPVSFENGIYTPR.L               | 2 | 3.92 | 0.52 | -2.12 |
| IPI00303963 | Complement C2 precursor (Fragment)                          | R.CSSNLVLTGSSER.E                 | 2 | 4.94 | 0.45 | -1.54 |
| IPI00303963 | Complement C2 precursor (Fragment)                          | R.DFHINLFR.M                      | 1 | 2.52 | 0.19 | -3.02 |
| IPI00303963 | Complement C2 precursor (Fragment)                          | R.DFHINLFR.M                      | 2 | 2.33 | 0.09 | -1.26 |
| IPI00303963 | Complement C2 precursor (Fragment)                          | R.DHENELLNK.Q                     | 1 | 3.02 | 0.30 | -3.38 |
| IPI00303963 | Complement C2 precursor (Fragment)                          | R.DHENELLNK.Q                     | 2 | 3.19 | 0.34 | -1.76 |
| IPI00303963 | Complement C2 precursor (Fragment)                          | R.DM*TEVISSLENANYK.D              | 2 | 5.61 | 0.43 | -3.40 |
| IPI00303963 | Complement C2 precursor (Fragment)                          | R.ECQNGVWVSGTEPICR.Q              | 2 | 3.24 | 0.36 | -0.06 |
| IPI00303963 | Complement C2 precursor (Fragment)                          | R.ELNELGSK.K                      | 2 | 1.72 | 0.14 | -4.00 |
| IPI00303963 | Complement C2 precursor (Fragment)                          | R.ELNELGSKK.D                     | 1 | 2.42 | 0.16 | -4.39 |
| IPI00303963 | Complement C2 precursor (Fragment)                          | R.ELNELGSKKDGER.H                 | 2 | 2.32 | 0.16 | -2.97 |
| IPI00303963 | Complement C2 precursor (Fragment)                          | R.EVVDQFLCSGTQEDESCKGESGGAVFLER.R | 3 | 5.26 | 0.54 | -6.75 |
| IPI00303963 | Complement C2 precursor (Fragment)                          | R.EVVDQFLCSGTQEDESCKGESGGAVFLER.R | 4 | 4.56 | 0.31 | -3.29 |
| IPI00303963 | Complement C2 precursor (Fragment)                          | R.GALISDQWVLTAAHCFR.D             | 2 | 3.93 | 0.49 | -2.59 |
| IPI00303963 | Complement C2 precursor (Fragment)                          | R.HAFILQDTK.A                     | 1 | 3.11 | 0.25 | -1.00 |
| IPI00303963 | Complement C2 precursor (Fragment)                          | R.HAFILQDTK.A                     | 2 | 3.15 | 0.41 | -1.58 |

|             |                                    |                                           |   |      |      |       |
|-------------|------------------------------------|-------------------------------------------|---|------|------|-------|
| IPI00303963 | Complement C2 precursor (Fragment) | R.HAIILLTDGK.S                            | 1 | 2.91 | 0.26 | -2.89 |
| IPI00303963 | Complement C2 precursor (Fragment) | R.HAIILLTDGK.S                            | 2 | 3.19 | 0.35 | -2.07 |
| IPI00303963 | Complement C2 precursor (Fragment) | R.LLGM*ETM*AWQEIR.H                       | 2 | 3.20 | 0.27 | -2.91 |
| IPI00303963 | Complement C2 precursor (Fragment) | R.QHLGDLNLFPL.-                           | 2 | 2.84 | 0.31 | -3.82 |
| IPI00303963 | Complement C2 precursor (Fragment) | R.QPYSYDFPEDVAPALGTSFSHM*LGATNPTQK.T      | 3 | 4.46 | 0.44 | -5.10 |
| IPI00303963 | Complement C2 precursor (Fragment) | R.QPYSYDFPEDVAPALGTSFSHM*LGATNPTQK.T      | 4 | 2.94 | 0.19 | -2.02 |
| IPI00304273 | Apolipoprotein A-IV precursor      | A.EVSADQVATVM*WDYFSQLSNNAK.E              | 2 | 5.18 | 0.63 | -4.09 |
| IPI00304273 | Apolipoprotein A-IV precursor      | A.EVSADQVATVM*WDYFSQLSNNAK.E              | 3 | 6.70 | 0.61 | -4.05 |
| IPI00304273 | Apolipoprotein A-IV precursor      | A.EVSADQVATVMWDYFSQLSNNAK.E               | 2 | 5.28 | 0.57 | -2.32 |
| IPI00304273 | Apolipoprotein A-IV precursor      | A.EVSADQVATVMWDYFSQLSNNAK.E               | 3 | 4.17 | 0.28 | -0.76 |
| IPI00304273 | Apolipoprotein A-IV precursor      | A.KIDQNVEELKGR.L                          | 2 | 3.77 | 0.24 | -2.82 |
| IPI00304273 | Apolipoprotein A-IV precursor      | D.YFSQLSNNAK.E                            | 2 | 3.18 | 0.33 | -1.38 |
| IPI00304273 | Apolipoprotein A-IV precursor      | K.AKIDQNVEELK.G                           | 2 | 2.95 | 0.11 | -3.37 |
| IPI00304273 | Apolipoprotein A-IV precursor      | K.AKIDQNVEELKGR.L                         | 2 | 4.21 | 0.40 | -4.06 |
| IPI00304273 | Apolipoprotein A-IV precursor      | K.AKIDQNVEELKGR.L                         | 3 | 4.25 | 0.43 | -3.20 |
| IPI00304273 | Apolipoprotein A-IV precursor      | K.ALVQQM*EQLR.Q                           | 2 | 3.54 | 0.24 | -3.15 |
| IPI00304273 | Apolipoprotein A-IV precursor      | K.ALVQQMEQLR.Q                            | 2 | 3.06 | 0.09 | -1.29 |
| IPI00304273 | Apolipoprotein A-IV precursor      | K.DLRDKVNSFFSTFK.E                        | 2 | 4.07 | 0.35 | -3.79 |
| IPI00304273 | Apolipoprotein A-IV precursor      | K.DLRDKVNSFFSTFK.E                        | 3 | 3.71 | 0.28 | -3.81 |
| IPI00304273 | Apolipoprotein A-IV precursor      | K.DLRDKVNSFFSTFK.E                        | 4 | 2.40 | 0.11 | -2.99 |
| IPI00304273 | Apolipoprotein A-IV precursor      | K.DLRDKVNSFFSTFKEK.E                      | 2 | 3.99 | 0.44 | -3.65 |
| IPI00304273 | Apolipoprotein A-IV precursor      | K.DSEKLKEEIGKELEELR.A                     | 2 | 5.33 | 0.34 | -3.95 |
| IPI00304273 | Apolipoprotein A-IV precursor      | K.DSEKLKEEIGKELEELR.A                     | 3 | 4.80 | 0.39 | -2.49 |
| IPI00304273 | Apolipoprotein A-IV precursor      | K.DSEKLKEEIGKELEELR.A                     | 4 | 4.01 | 0.41 | -2.73 |
| IPI00304273 | Apolipoprotein A-IV precursor      | K.EAVEHLQK.S                              | 1 | 2.15 | 0.12 | -4.16 |
| IPI00304273 | Apolipoprotein A-IV precursor      | K.EAVEHLQK.S                              | 2 | 2.53 | 0.24 | -2.28 |
| IPI00304273 | Apolipoprotein A-IV precursor      | K.EKESQDKTSLPELEQQQEQQQEQQQEQVQM*LAPLES.- | 3 | 5.05 | 0.47 | -1.76 |
| IPI00304273 | Apolipoprotein A-IV precursor      | K.EKESQDKTSLPELEQQQEQQQEQQQEQVQM*LAPLES.- | 4 | 3.18 | 0.18 | -4.46 |
| IPI00304273 | Apolipoprotein A-IV precursor      | K.ESQDKTSLPELEQQQEQQQEQQQEQVQM*LAPLES.-   | 3 | 5.13 | 0.45 | -4.02 |
| IPI00304273 | Apolipoprotein A-IV precursor      | K.IDQNVEELK.G                             | 1 | 2.68 | 0.15 | -4.80 |
| IPI00304273 | Apolipoprotein A-IV precursor      | K.IDQNVEELK.G                             | 2 | 3.15 | 0.18 | -2.93 |
| IPI00304273 | Apolipoprotein A-IV precursor      | K.IDQNVEELKGR.L                           | 2 | 3.91 | 0.26 | -3.45 |
| IPI00304273 | Apolipoprotein A-IV precursor      | K.IDQNVEELKGR.L                           | 3 | 3.30 | 0.19 | -3.94 |
| IPI00304273 | Apolipoprotein A-IV precursor      | K.IDQTVEELR.R                             | 2 | 2.80 | 0.15 | -1.87 |
| IPI00304273 | Apolipoprotein A-IV precursor      | K.IDQTVEELRR.S                            | 2 | 2.46 | 0.10 | -2.07 |
| IPI00304273 | Apolipoprotein A-IV precursor      | K.IGDNLRELQQR.L                           | 3 | 1.90 | 0.10 | -1.75 |
| IPI00304273 | Apolipoprotein A-IV precursor      | K.KLVPFATELHER.L                          | 2 | 3.25 | 0.34 | -4.46 |
| IPI00304273 | Apolipoprotein A-IV precursor      | K.KLVPFATELHER.L                          | 3 | 4.22 | 0.40 | -3.89 |
| IPI00304273 | Apolipoprotein A-IV precursor      | K.LGEVNTYAGDLQK.K                         | 1 | 3.35 | 0.42 | -2.75 |
| IPI00304273 | Apolipoprotein A-IV precursor      | K.LGEVNTYAGDLQK.K                         | 2 | 4.45 | 0.46 | -3.68 |
| IPI00304273 | Apolipoprotein A-IV precursor      | K.LGEVNTYAGDLQKK.L                        | 2 | 3.34 | 0.30 | -2.41 |
| IPI00304273 | Apolipoprotein A-IV precursor      | K.LGEVNTYAGDLQKK.L                        | 3 | 2.66 | 0.19 | -0.32 |

|             |                               |                                 |   |      |      |       |
|-------------|-------------------------------|---------------------------------|---|------|------|-------|
| IPI00304273 | Apolipoprotein A-IV precursor | K.LGPHAGDVEGHLSFLEK.D           | 2 | 5.19 | 0.45 | -6.99 |
| IPI00304273 | Apolipoprotein A-IV precursor | K.LGPHAGDVEGHLSFLEK.D           | 3 | 5.05 | 0.46 | -6.78 |
| IPI00304273 | Apolipoprotein A-IV precursor | K.LGPHAGDVEGHLSFLEK.D           | 4 | 4.24 | 0.47 | -5.57 |
| IPI00304273 | Apolipoprotein A-IV precursor | K.LGPHAGDVEGHLSFLEKDLR.D        | 2 | 5.88 | 0.54 | -4.39 |
| IPI00304273 | Apolipoprotein A-IV precursor | K.LGPHAGDVEGHLSFLEKDLR.D        | 3 | 4.00 | 0.41 | -3.61 |
| IPI00304273 | Apolipoprotein A-IV precursor | K.LGPHAGDVEGHLSFLEKDLR.D        | 4 | 3.42 | 0.33 | -2.28 |
| IPI00304273 | Apolipoprotein A-IV precursor | K.LKEEIGKELEELR.A               | 2 | 4.46 | 0.37 | -3.55 |
| IPI00304273 | Apolipoprotein A-IV precursor | K.LKEEIGKELEELR.A               | 3 | 4.80 | 0.44 | -2.42 |
| IPI00304273 | Apolipoprotein A-IV precursor | K.LNHQLEGLTFQM*K.K              | 2 | 4.02 | 0.32 | -4.33 |
| IPI00304273 | Apolipoprotein A-IV precursor | K.LNHQLEGLTFQM*K.K              | 3 | 3.90 | 0.31 | -3.13 |
| IPI00304273 | Apolipoprotein A-IV precursor | K.LVPFATELHER.L                 | 2 | 2.83 | 0.49 | -3.94 |
| IPI00304273 | Apolipoprotein A-IV precursor | K.NAEELKAR.I                    | 1 | 2.00 | 0.06 | -4.41 |
| IPI00304273 | Apolipoprotein A-IV precursor | K.NAEELKAR.I                    | 2 | 2.85 | 0.12 | -2.95 |
| IPI00304273 | Apolipoprotein A-IV precursor | K.SELTQQLNALFQDK.L              | 1 | 3.86 | 0.43 | -4.16 |
| IPI00304273 | Apolipoprotein A-IV precursor | K.SELTQQLNALFQDK.L              | 2 | 5.38 | 0.38 | -5.02 |
| IPI00304273 | Apolipoprotein A-IV precursor | K.SELTQQLNALFQDK.L              | 3 | 4.62 | 0.45 | -3.25 |
| IPI00304273 | Apolipoprotein A-IV precursor | K.SELTQQLNALFQDKLGEVNTYAGDLQK.K | 2 | 5.07 | 0.59 | -2.50 |
| IPI00304273 | Apolipoprotein A-IV precursor | K.SELTQQLNALFQDKLGEVNTYAGDLQK.K | 3 | 6.61 | 0.63 | -5.14 |
| IPI00304273 | Apolipoprotein A-IV precursor | K.SELTQQLNALFQDKLGEVNTYAGDLQK.K | 4 | 5.12 | 0.44 | -3.50 |
| IPI00304273 | Apolipoprotein A-IV precursor | K.SLAELGGHLDQQVEEFR.R           | 2 | 5.67 | 0.51 | -8.42 |
| IPI00304273 | Apolipoprotein A-IV precursor | K.SLAELGGHLDQQVEEFR.R           | 3 | 5.92 | 0.50 | -4.30 |
| IPI00304273 | Apolipoprotein A-IV precursor | K.SLAELGGHLDQQVEEFR.R           | 2 | 4.43 | 0.35 | -5.16 |
| IPI00304273 | Apolipoprotein A-IV precursor | K.SLAELGGHLDQQVEEFR.R           | 3 | 4.55 | 0.41 | -5.23 |
| IPI00304273 | Apolipoprotein A-IV precursor | K.SLAELGGHLDQQVEEFR.R           | 4 | 1.74 | 0.17 | -2.65 |
| IPI00304273 | Apolipoprotein A-IV precursor | K.VKIDQTV EELRR.S               | 2 | 2.91 | 0.15 | -3.70 |
| IPI00304273 | Apolipoprotein A-IV precursor | K.VKIDQTV EELRR.S               | 3 | 2.36 | 0.14 | -1.79 |
| IPI00304273 | Apolipoprotein A-IV precursor | K.VNSFFSTFK.E                   | 1 | 1.91 | 0.15 | -3.24 |
| IPI00304273 | Apolipoprotein A-IV precursor | K.VNSFFSTFK.E                   | 2 | 2.75 | 0.39 | -1.57 |
| IPI00304273 | Apolipoprotein A-IV precursor | L.AELGGHLDQQVEEFR.R             | 2 | 3.91 | 0.26 | 0.99  |
| IPI00304273 | Apolipoprotein A-IV precursor | L.APYAQDTQEKLNHQLEGLTFQM*K.K    | 3 | 3.92 | 0.47 | -4.42 |
| IPI00304273 | Apolipoprotein A-IV precursor | L.LPHANEVSQK.I                  | 1 | 2.12 | 0.30 | -3.98 |
| IPI00304273 | Apolipoprotein A-IV precursor | L.RTQVNTQAEQLR.R                | 2 | 2.91 | 0.18 | -4.18 |
| IPI00304273 | Apolipoprotein A-IV precursor | R.DKVNSFFSTFK.E                 | 1 | 3.20 | 0.37 | -1.59 |
| IPI00304273 | Apolipoprotein A-IV precursor | R.DKVNSFFSTFK.E                 | 2 | 3.46 | 0.33 | -2.96 |
| IPI00304273 | Apolipoprotein A-IV precursor | R.DKVNSFFSTFK.E                 | 3 | 2.62 | 0.09 | -2.89 |
| IPI00304273 | Apolipoprotein A-IV precursor | R.DKVNSFFSTFKEK.E               | 2 | 4.68 | 0.34 | -2.14 |
| IPI00304273 | Apolipoprotein A-IV precursor | R.DKVNSFFSTFKEK.E               | 3 | 3.48 | 0.44 | -1.26 |
| IPI00304273 | Apolipoprotein A-IV precursor | R.DKVNSFFSTFKEKESQDK.T          | 3 | 2.45 | 0.14 | -3.94 |
| IPI00304273 | Apolipoprotein A-IV precursor | R.ENADSLQASLRPHADELK.A          | 2 | 3.23 | 0.24 | -4.63 |
| IPI00304273 | Apolipoprotein A-IV precursor | R.ENADSLQASLRPHADELK.A          | 3 | 2.62 | 0.21 | -2.95 |
| IPI00304273 | Apolipoprotein A-IV precursor | R.ENADSLQASLRPHADELKAK.I        | 3 | 3.53 | 0.38 | -2.09 |
| IPI00304273 | Apolipoprotein A-IV precursor | R.GNLRGNTEGLQK.S                | 2 | 2.86 | 0.21 | -2.92 |



|             |                                                                     |                                |   |      |      |       |
|-------------|---------------------------------------------------------------------|--------------------------------|---|------|------|-------|
| IPI00304273 | Apolipoprotein A-IV precursor                                       | R.GNLRGNTGLQK.S                | 3 | 2.80 | 0.42 | -3.25 |
| IPI00304273 | Apolipoprotein A-IV precursor                                       | R.ISASAEELR.Q                  | 1 | 2.28 | 0.06 | -1.84 |
| IPI00304273 | Apolipoprotein A-IV precursor                                       | R.ISASAEELR.Q                  | 2 | 3.74 | 0.30 | -1.75 |
| IPI00304273 | Apolipoprotein A-IV precursor                                       | R.ISASAEELRQR.L                | 2 | 2.66 | 0.07 | -3.51 |
| IPI00304273 | Apolipoprotein A-IV precursor                                       | R.LAKDSEKLKEEIGKELEELR.A       | 3 | 4.01 | 0.43 | -4.47 |
| IPI00304273 | Apolipoprotein A-IV precursor                                       | R.LAKDSEKLKEEIGKELEELR.A       | 4 | 4.38 | 0.37 | -4.67 |
| IPI00304273 | Apolipoprotein A-IV precursor                                       | R.LAPLAEDVR.G                  | 1 | 1.83 | 0.07 | -3.95 |
| IPI00304273 | Apolipoprotein A-IV precursor                                       | R.LAPLAEDVR.G                  | 2 | 2.44 | 0.14 | -2.78 |
| IPI00304273 | Apolipoprotein A-IV precursor                                       | R.LEPYADQLR.T                  | 1 | 2.24 | 0.08 | -3.56 |
| IPI00304273 | Apolipoprotein A-IV precursor                                       | R.LEPYADQLR.T                  | 2 | 2.14 | 0.18 | -3.19 |
| IPI00304273 | Apolipoprotein A-IV precursor                                       | R.LLPHANEVSQK.I                | 1 | 2.80 | 0.18 | -3.97 |
| IPI00304273 | Apolipoprotein A-IV precursor                                       | R.LLPHANEVSQK.I                | 2 | 2.44 | 0.35 | -3.52 |
| IPI00304273 | Apolipoprotein A-IV precursor                                       | R.LTPYADEFK.V                  | 1 | 1.83 | 0.25 | -3.56 |
| IPI00304273 | Apolipoprotein A-IV precursor                                       | R.LTPYADEFK.V                  | 2 | 1.98 | 0.31 | -2.48 |
| IPI00304273 | Apolipoprotein A-IV precursor                                       | R.LTPYADEFK.VK.I               | 2 | 2.06 | 0.33 | -1.89 |
| IPI00304273 | Apolipoprotein A-IV precursor                                       | R.QKLGPHAGDVEGHLFSFLEK.D       | 2 | 2.19 | 0.30 | -2.46 |
| IPI00304273 | Apolipoprotein A-IV precursor                                       | R.QLTPYAQR.M                   | 2 | 1.57 | 0.09 | -2.18 |
| IPI00304273 | Apolipoprotein A-IV precursor                                       | R.RQLTPYAQR.M                  | 2 | 2.87 | 0.11 | -2.48 |
| IPI00304273 | Apolipoprotein A-IV precursor                                       | R.RVEPYGENFNK.A                | 1 | 2.62 | 0.36 | -3.03 |
| IPI00304273 | Apolipoprotein A-IV precursor                                       | R.RVEPYGENFNK.A                | 2 | 3.74 | 0.28 | -4.12 |
| IPI00304273 | Apolipoprotein A-IV precursor                                       | R.RVEPYGENFNK.A                | 3 | 3.47 | 0.34 | -2.74 |
| IPI00304273 | Apolipoprotein A-IV precursor                                       | R.SLAPYAQDTQEK.L               | 1 | 2.78 | 0.35 | -3.17 |
| IPI00304273 | Apolipoprotein A-IV precursor                                       | R.SLAPYAQDTQEK.L               | 2 | 3.51 | 0.45 | -3.51 |
| IPI00304273 | Apolipoprotein A-IV precursor                                       | R.SLAPYAQDTQEKLNHQLEGLTFQM*K.K | 2 | 3.15 | 0.31 | -3.76 |
| IPI00304273 | Apolipoprotein A-IV precursor                                       | R.SLAPYAQDTQEKLNHQLEGLTFQM*K.K | 3 | 4.29 | 0.47 | -3.95 |
| IPI00304273 | Apolipoprotein A-IV precursor                                       | R.TQVNTQAEQLR.R                | 1 | 2.64 | 0.15 | -2.85 |
| IPI00304273 | Apolipoprotein A-IV precursor                                       | R.TQVNTQAEQLR.R                | 2 | 3.97 | 0.30 | -2.53 |
| IPI00304273 | Apolipoprotein A-IV precursor                                       | R.TQVNTQAEQLRR.Q               | 2 | 3.01 | 0.19 | -3.58 |
| IPI00304273 | Apolipoprotein A-IV precursor                                       | R.VEPYGENFNK.A                 | 1 | 2.20 | 0.18 | -3.90 |
| IPI00304273 | Apolipoprotein A-IV precursor                                       | R.VEPYGENFNK.A                 | 2 | 2.19 | 0.24 | -3.50 |
| IPI00304273 | Apolipoprotein A-IV precursor                                       | R.VLRENADSLQASLRPHADELK.A      | 2 | 3.44 | 0.24 | -4.31 |
| IPI00304273 | Apolipoprotein A-IV precursor                                       | R.VLRENADSLQASLRPHADELK.A      | 3 | 3.64 | 0.25 | -4.09 |
| IPI00304273 | Apolipoprotein A-IV precursor                                       | R.VLRENADSLQASLRPHADELK.A      | 4 | 3.43 | 0.31 | -1.88 |
| IPI00304273 | Apolipoprotein A-IV precursor                                       | R.VLRENADSLQASLRPHADELK.A      | 5 | 3.77 | 0.35 | -3.36 |
| IPI00304273 | Apolipoprotein A-IV precursor                                       | V.LRENADSLQASLRPHADELK.A       | 3 | 3.62 | 0.21 | -3.34 |
| IPI00304273 | Apolipoprotein A-IV precursor                                       | V.PFATELHER.L                  | 2 | 2.90 | 0.18 | -2.61 |
| IPI00304273 | Apolipoprotein A-IV precursor                                       | W.DYFSQLSNNAK.E                | 2 | 3.37 | 0.28 | -3.10 |
| IPI00304331 | Galactosylgalactosylxylosylprotein 3-beta-glucuronosyltransferase 3 | K.M*KQEEQLQR.Q                 | 2 | 2.76 | 0.10 | -3.27 |
| IPI00304331 | Galactosylgalactosylxylosylprotein 3-beta-glucuronosyltransferase 3 | R.FEGPQVQDGR.V                 | 2 | 2.93 | 0.38 | -3.04 |

|             |                                                                     |                                             |   |      |      |       |
|-------------|---------------------------------------------------------------------|---------------------------------------------|---|------|------|-------|
| IPI00304331 | Galactosylgalactosylxylosylprotein 3-beta-glucuronosyltransferase 3 | R.GHLESSLLSHLVDPK.D                         | 2 | 3.23 | 0.32 | -3.65 |
| IPI00304331 | Galactosylgalactosylxylosylprotein 3-beta-glucuronosyltransferase 3 | R.ISQLQAE LR.R                              | 2 | 3.07 | 0.07 | -1.60 |
| IPI00304331 | Galactosylgalactosylxylosylprotein 3-beta-glucuronosyltransferase 3 | R.LSQTLSLVPR.L                              | 2 | 3.54 | 0.20 | -1.36 |
| IPI00304527 | Protein FAM83B                                                      | K.KPSDSL SVASSSR.E                          | 2 | 2.20 | 0.06 | -3.72 |
| IPI00304577 | Isoform A of AP-2 complex subunit alpha-1                           | K.ANHPM*DAE VTK.A                           | 3 | 2.58 | 0.14 | -2.65 |
| IPI00304577 | Isoform A of AP-2 complex subunit alpha-1                           | K.LLGFGSALLDNVDPNPENFVGAGIIQTK.A            | 3 | 5.05 | 0.47 | -4.26 |
| IPI00304577 | Isoform A of AP-2 complex subunit alpha-1                           | K.NAILFETISLIIHYDSEP NLLVR.A                | 3 | 2.70 | 0.24 | -1.38 |
| IPI00304596 | Non-POU domain-containing octamer-binding protein                   | R.NLPQYVSNELLE EAFSVFGQVER.A                | 3 | 3.26 | 0.32 | -4.82 |
| IPI00304789 | 27 kDa protein                                                      | R.SQKGIFLFRRLKDIVDWR.K                      | 3 | 3.68 | 0.12 |       |
| IPI00304840 | Isoform 2C2 of Collagen alpha-2(VI) chain precursor                 | K.NFVINVVNR.L                               | 2 | 2.83 | 0.29 | -2.23 |
| IPI00304840 | Isoform 2C2 of Collagen alpha-2(VI) chain precursor                 | K.NLQGISSFR.R                               | 2 | 2.62 | 0.23 | -1.27 |
| IPI00304840 | Isoform 2C2 of Collagen alpha-2(VI) chain precursor                 | R.AAVFHEK.D                                 | 2 | 2.00 | 0.07 | -3.47 |
| IPI00304840 | Isoform 2C2 of Collagen alpha-2(VI) chain precursor                 | R.KQNVVPTVLALGSDVDM*DVLTTLSLGD R.A          | 3 | 3.49 | 0.29 | -4.79 |
| IPI00304840 | Isoform 2C2 of Collagen alpha-2(VI) chain precursor                 | R.LGEQNFHK.A                                | 2 | 1.88 | 0.12 | -3.69 |
| IPI00304840 | Isoform 2C2 of Collagen alpha-2(VI) chain precursor                 | R.RDDDPLNAR.V                               | 2 | 2.57 | 0.10 | 0.40  |
| IPI00304865 | transforming growth factor, beta receptor III                       | A.TAGPEPGALCE LSPVSASHPVQALM*ESFTVLSGCASR.G | 3 | 4.86 | 0.58 | -4.02 |
| IPI00304865 | transforming growth factor, beta receptor III                       | K.NFLSLNYLAEYLQPK.A                         | 2 | 4.47 | 0.44 | -5.35 |
| IPI00304865 | transforming growth factor, beta receptor III                       | K.SIRDDIPSTQGNLVK.W                         | 2 | 4.04 | 0.14 | -3.00 |
| IPI00304865 | transforming growth factor, beta receptor III                       | R.GTTGLPQEVHVLNLR.T                         | 2 | 3.70 | 0.45 | -4.06 |
| IPI00304865 | transforming growth factor, beta receptor III                       | R.ILLDPGALPALQNPPIR.G                       | 3 | 2.99 | 0.34 | -2.70 |
| IPI00304865 | transforming growth factor, beta receptor III                       | R.KEYGAVTSFTELK.I                           | 2 | 3.98 | 0.31 | -5.35 |
| IPI00304865 | transforming growth factor, beta receptor III                       | R.TAGQGPQLQR.E                              | 2 | 3.54 | 0.33 | -1.37 |
| IPI00304925 | Heat shock 70 kDa protein 1                                         | K.ATAGDTHLGGEDFDNR.L                        | 3 | 2.66 | 0.36 | -1.77 |
| IPI00304925 | Heat shock 70 kDa protein 1                                         | K.DNNLLGR.F                                 | 1 | 2.13 | 0.11 | -3.90 |
| IPI00304925 | Heat shock 70 kDa protein 1                                         | K.ITITNDKGR.L                               | 1 | 2.08 | 0.20 | -3.55 |
| IPI00304925 | Heat shock 70 kDa protein 1                                         | K.ITITNDKGR.L                               | 2 | 2.65 | 0.24 | -2.81 |
| IPI00304925 | Heat shock 70 kDa protein 1                                         | K.LLQDFFNGR.D                               | 2 | 2.31 | 0.36 | -3.60 |
| IPI00304925 | Heat shock 70 kDa protein 1                                         | K.NALESYAFNM*K.S                            | 2 | 3.63 | 0.36 | -3.06 |
| IPI00304925 | Heat shock 70 kDa protein 1                                         | K.VQVSYKGETK.A                              | 2 | 2.85 | 0.32 | -2.71 |
| IPI00304925 | Heat shock 70 kDa protein 1                                         | K.YKAEDEVQR.E                               | 2 | 2.82 | 0.27 | -0.92 |
| IPI00304925 | Heat shock 70 kDa protein 1                                         | K.YKAEDEVQRER.V                             | 2 | 2.74 | 0.21 | -3.20 |
| IPI00304925 | Heat shock 70 kDa protein 1                                         | R.AM*TKDNNLLGR.F                            | 3 | 2.60 | 0.09 | -4.52 |

|             |                                                        |                                 |   |      |      |       |
|-------------|--------------------------------------------------------|---------------------------------|---|------|------|-------|
| IPI00304925 | Heat shock 70 kDa protein 1                            | R.LIGDAAK.N                     | 1 | 1.96 | 0.12 | -2.67 |
| IPI00304925 | Heat shock 70 kDa protein 1                            | R.LSKEEIER.M                    | 2 | 2.41 | 0.10 | -3.04 |
| IPI00304925 | Heat shock 70 kDa protein 1                            | R.M*VQEAEKYK.A                  | 2 | 2.07 | 0.11 | -2.60 |
| IPI00304925 | Heat shock 70 kDa protein 1                            | R.TTPSYVAFDTER.L                | 2 | 2.87 | 0.41 | -0.70 |
| IPI00304962 | Collagen alpha-2(I) chain precursor                    | K.AVILQGSNDVELVAEGNSR.F         | 2 | 4.81 | 0.49 | -1.46 |
| IPI00304962 | Collagen alpha-2(I) chain precursor                    | K.AVILQGSNDVELVAEGNSR.F         | 3 | 4.58 | 0.23 | -1.95 |
| IPI00304962 | Collagen alpha-2(I) chain precursor                    | K.DYEV DATL.K.S                 | 2 | 1.93 | 0.11 | -1.06 |
| IPI00304962 | Collagen alpha-2(I) chain precursor                    | K.EM*ATQLAFM*R.L                | 2 | 2.96 | 0.37 | -2.94 |
| IPI00304962 | Collagen alpha-2(I) chain precursor                    | K.GVGLGPGPM*GLM*GPR.G           | 2 | 3.15 | 0.45 | -3.39 |
| IPI00304962 | Collagen alpha-2(I) chain precursor                    | K.HG NRGETGPSGPVGPAGAVGPR.G     | 3 | 4.54 | 0.45 | -3.35 |
| IPI00304962 | Collagen alpha-2(I) chain precursor                    | K.NSIAYM*DEETGNLKK.A            | 2 | 3.93 | 0.33 | -2.55 |
| IPI00304962 | Collagen alpha-2(I) chain precursor                    | K.SLNNQIETLLTPEGSR.K            | 2 | 3.72 | 0.43 | -5.07 |
| IPI00304962 | Collagen alpha-2(I) chain precursor                    | R.AQPENIPAK.N                   | 1 | 1.75 | 0.17 | -1.87 |
| IPI00304962 | Collagen alpha-2(I) chain precursor                    | R.GPAGPSGPAGKDGR.T              | 2 | 3.24 | 0.37 | -3.52 |
| IPI00304962 | Collagen alpha-2(I) chain precursor                    | R.GPSGPQGIR.G                   | 2 | 2.56 | 0.16 | -2.37 |
| IPI00305380 | Insulin-like growth factor-binding protein 4 precursor | K.GELDCHQLADSFRE.-              | 3 | 3.11 | 0.28 | -0.41 |
| IPI00305380 | Insulin-like growth factor-binding protein 4 precursor | K.LPGGLEPK.G                    | 2 | 2.32 | 0.13 | -3.06 |
| IPI00305380 | Insulin-like growth factor-binding protein 4 precursor | K.TGVKLPGGLEPK.G                | 1 | 2.16 | 0.17 | -3.79 |
| IPI00305380 | Insulin-like growth factor-binding protein 4 precursor | K.TGVKLPGGLEPK.G                | 2 | 2.19 | 0.10 | -2.81 |
| IPI00305380 | Insulin-like growth factor-binding protein 4 precursor | R.EDARVPQGSCQSELHR.A            | 3 | 3.34 | 0.27 | -2.56 |
| IPI00305461 | Inter-alpha-trypsin inhibitor heavy chain H2 precursor | A.DAPPQDPSCCSGALYYGSK.V         | 3 | 3.74 | 0.42 | -1.99 |
| IPI00305461 | Inter-alpha-trypsin inhibitor heavy chain H2 precursor | K.AGELEVFNGYFVHFFAPDNL DPIP.K.N | 2 | 4.26 | 0.47 | -4.23 |
| IPI00305461 | Inter-alpha-trypsin inhibitor heavy chain H2 precursor | K.AGELEVFNGYFVHFFAPDNL DPIP.K.N | 3 | 6.25 | 0.55 | -7.74 |
| IPI00305461 | Inter-alpha-trypsin inhibitor heavy chain H2 precursor | K.AGELEVFNGYFVHFFAPDNL DPIP.K.N | 4 | 3.50 | 0.27 | -3.93 |
| IPI00305461 | Inter-alpha-trypsin inhibitor heavy chain H2 precursor | K.AHVSFKPTVAQQR.I               | 2 | 3.66 | 0.47 | -4.16 |
| IPI00305461 | Inter-alpha-trypsin inhibitor heavy chain H2 precursor | K.AHVSFKPTVAQQR.I               | 3 | 3.03 | 0.40 | -1.98 |
| IPI00305461 | Inter-alpha-trypsin inhibitor heavy chain H2 precursor | K.DKHADPDFTR.K                  | 1 | 2.36 | 0.32 | -4.15 |
| IPI00305461 | Inter-alpha-trypsin inhibitor heavy chain H2 precursor | K.DKHADPDFTR.K                  | 2 | 2.86 | 0.42 | -3.48 |

|             |                                                        |                                                |   |      |      |       |
|-------------|--------------------------------------------------------|------------------------------------------------|---|------|------|-------|
| IPI00305461 | Inter-alpha-trypsin inhibitor heavy chain H2 precursor | K.DKHADPDFTR.K                                 | 3 | 2.45 | 0.21 | -1.84 |
| IPI00305461 | Inter-alpha-trypsin inhibitor heavy chain H2 precursor | K.FDPAKLDQIESVITATSANTQLVLETLAQM*DDLQDFLSK.D   | 3 | 6.79 | 0.63 | -4.75 |
| IPI00305461 | Inter-alpha-trypsin inhibitor heavy chain H2 precursor | K.FDPAKLDQIESVITATSANTQLVLETLAQM*DDLQDFLSK.D   | 4 | 6.84 | 0.49 | -4.28 |
| IPI00305461 | Inter-alpha-trypsin inhibitor heavy chain H2 precursor | K.FDPAKLDQIESVITATSANTQLVLETLAQM*DDLQDFLSKDK.H | 3 | 3.02 | 0.11 | -3.63 |
| IPI00305461 | Inter-alpha-trypsin inhibitor heavy chain H2 precursor | K.FDPAKLDQIESVITATSANTQLVLETLAQM*DDLQDFLSKDK.H | 4 | 4.43 | 0.32 | -4.46 |
| IPI00305461 | Inter-alpha-trypsin inhibitor heavy chain H2 precursor | K.FQLVAENR.R                                   | 2 | 2.42 | 0.08 | -1.60 |
| IPI00305461 | Inter-alpha-trypsin inhibitor heavy chain H2 precursor | K.FYNQVSTPLLR.N                                | 1 | 2.60 | 0.32 | -2.95 |
| IPI00305461 | Inter-alpha-trypsin inhibitor heavy chain H2 precursor | K.FYNQVSTPLLR.N                                | 2 | 4.04 | 0.37 | -2.93 |
| IPI00305461 | Inter-alpha-trypsin inhibitor heavy chain H2 precursor | K.HADPDFTR.K                                   | 2 | 2.42 | 0.13 | -2.87 |
| IPI00305461 | Inter-alpha-trypsin inhibitor heavy chain H2 precursor | K.HLEVDVWVIEPQGLR.F                            | 2 | 4.88 | 0.56 | -3.21 |
| IPI00305461 | Inter-alpha-trypsin inhibitor heavy chain H2 precursor | K.HLEVDVWVIEPQGLR.F                            | 3 | 3.22 | 0.13 | -2.51 |
| IPI00305461 | Inter-alpha-trypsin inhibitor heavy chain H2 precursor | K.IQPSGGTNINEALLR.A                            | 2 | 3.76 | 0.50 | -2.84 |
| IPI00305461 | Inter-alpha-trypsin inhibitor heavy chain H2 precursor | K.KFYNQVSTPLLR.N                               | 2 | 3.59 | 0.34 | -3.56 |
| IPI00305461 | Inter-alpha-trypsin inhibitor heavy chain H2 precursor | K.LGSYEHR.I                                    | 2 | 2.40 | 0.07 | -1.55 |
| IPI00305461 | Inter-alpha-trypsin inhibitor heavy chain H2 precursor | K.NVKENIQDNISLFLGM*GFDVDYDFLKR.L               | 4 | 3.20 | 0.13 | -3.14 |
| IPI00305461 | Inter-alpha-trypsin inhibitor heavy chain H2 precursor | K.RLSNENHGIAQR.I                               | 2 | 3.91 | 0.36 | -3.89 |
| IPI00305461 | Inter-alpha-trypsin inhibitor heavy chain H2 precursor | K.TAGLVR.S                                     | 1 | 1.70 | 0.10 | -1.87 |
| IPI00305461 | Inter-alpha-trypsin inhibitor heavy chain H2 precursor | K.TILDDLRAEDHFSVIDFNQIR.T                      | 2 | 3.31 | 0.41 | -2.04 |
| IPI00305461 | Inter-alpha-trypsin inhibitor heavy chain H2 precursor | K.TILDDLRAEDHFSVIDFNQIR.T                      | 3 | 5.78 | 0.51 | -4.14 |
| IPI00305461 | Inter-alpha-trypsin inhibitor heavy chain H2 precursor | K.TILDDLRAEDHFSVIDFNQIR.T                      | 4 | 3.40 | 0.17 | -2.66 |
| IPI00305461 | Inter-alpha-trypsin inhibitor heavy chain H2 precursor | K.VQFELHYQEVK.W                                | 2 | 3.95 | 0.11 | -3.37 |

|             |                                                        |                                          |   |      |      |       |
|-------------|--------------------------------------------------------|------------------------------------------|---|------|------|-------|
| IPI00305461 | Inter-alpha-trypsin inhibitor heavy chain H2 precursor | K.VQSTITSR.M                             | 1 | 1.83 | 0.09 | -3.66 |
| IPI00305461 | Inter-alpha-trypsin inhibitor heavy chain H2 precursor | K.VQSTITSR.M                             | 2 | 2.54 | 0.17 | -3.47 |
| IPI00305461 | Inter-alpha-trypsin inhibitor heavy chain H2 precursor | K.VVNNSPQPQNVVFDVQIPK.G                  | 2 | 5.60 | 0.55 | -4.53 |
| IPI00305461 | Inter-alpha-trypsin inhibitor heavy chain H2 precursor | K.VVNNSPQPQNVVFDVQIPK.G                  | 3 | 5.95 | 0.51 | -2.88 |
| IPI00305461 | Inter-alpha-trypsin inhibitor heavy chain H2 precursor | L.SNENHGIAQR.I                           | 2 | 3.78 | 0.39 | -2.46 |
| IPI00305461 | Inter-alpha-trypsin inhibitor heavy chain H2 precursor | R.AEDHFSVIDFNQIR.T                       | 2 | 4.45 | 0.44 | -2.31 |
| IPI00305461 | Inter-alpha-trypsin inhibitor heavy chain H2 precursor | R.AEDHFSVIDFNQIR.T                       | 3 | 4.52 | 0.17 | -2.49 |
| IPI00305461 | Inter-alpha-trypsin inhibitor heavy chain H2 precursor | R.AIFILNEANNLGLLDPNSVSLIILVSDGDPTVGELK.L | 3 | 2.73 | 0.36 | -2.54 |
| IPI00305461 | Inter-alpha-trypsin inhibitor heavy chain H2 precursor | R.ETAVDGELVVLYDVK.R                      | 2 | 4.98 | 0.55 | -5.54 |
| IPI00305461 | Inter-alpha-trypsin inhibitor heavy chain H2 precursor | R.FLHVPDTFEGHFDGVPVISK.G                 | 2 | 4.96 | 0.48 | -4.08 |
| IPI00305461 | Inter-alpha-trypsin inhibitor heavy chain H2 precursor | R.FLHVPDTFEGHFDGVPVISK.G                 | 3 | 3.96 | 0.44 | -4.04 |
| IPI00305461 | Inter-alpha-trypsin inhibitor heavy chain H2 precursor | R.FLHVPDTFEGHFDGVPVISK.G                 | 4 | 3.74 | 0.37 | -3.36 |
| IPI00305461 | Inter-alpha-trypsin inhibitor heavy chain H2 precursor | R.IYGNQDTSSQLK.K                         | 2 | 3.62 | 0.37 | -4.56 |
| IPI00305461 | Inter-alpha-trypsin inhibitor heavy chain H2 precursor | R.IYGNQDTSSQLK.F                         | 2 | 4.54 | 0.23 | -3.47 |
| IPI00305461 | Inter-alpha-trypsin inhibitor heavy chain H2 precursor | R.IYGNQDTSSQLK.F                         | 3 | 1.80 | 0.19 | -2.90 |
| IPI00305461 | Inter-alpha-trypsin inhibitor heavy chain H2 precursor | R.IYLQPGR.L                              | 1 | 2.09 | 0.11 | -3.44 |
| IPI00305461 | Inter-alpha-trypsin inhibitor heavy chain H2 precursor | R.IYLQPGR.L                              | 2 | 2.19 | 0.09 | -3.37 |
| IPI00305461 | Inter-alpha-trypsin inhibitor heavy chain H2 precursor | R.LSNENHGIAQR.I                          | 1 | 2.90 | 0.30 | -3.56 |
| IPI00305461 | Inter-alpha-trypsin inhibitor heavy chain H2 precursor | R.LSNENHGIAQR.I                          | 2 | 4.17 | 0.39 | -3.65 |
| IPI00305461 | Inter-alpha-trypsin inhibitor heavy chain H2 precursor | R.LSNENHGIAQR.I                          | 3 | 2.02 | 0.20 | -5.27 |
| IPI00305461 | Inter-alpha-trypsin inhibitor heavy chain H2 precursor | R.M*ATTM*IQSK.V                          | 1 | 1.36 | 0.09 | -3.34 |

|             |                                                                                         |                                       |   |      |      |       |
|-------------|-----------------------------------------------------------------------------------------|---------------------------------------|---|------|------|-------|
| IPI00305461 | Inter-alpha-trypsin inhibitor heavy chain H2 precursor                                  | R.M*ATTM*IQSK.V                       | 2 | 3.15 | 0.40 | -1.73 |
| IPI00305461 | Inter-alpha-trypsin inhibitor heavy chain H2 precursor                                  | R.M*ATTMIQSK.V                        | 2 | 2.53 | 0.25 |       |
| IPI00305461 | Inter-alpha-trypsin inhibitor heavy chain H2 precursor                                  | R.M*LADAPPQDPSCCSGALYYGSK.V           | 2 | 4.39 | 0.62 | -4.01 |
| IPI00305461 | Inter-alpha-trypsin inhibitor heavy chain H2 precursor                                  | R.M*LADAPPQDPSCCSGALYYGSK.V           | 3 | 3.62 | 0.38 | -3.80 |
| IPI00305461 | Inter-alpha-trypsin inhibitor heavy chain H2 precursor                                  | R.MATTM*IQSK.V                        | 2 | 2.81 | 0.26 |       |
| IPI00305461 | Inter-alpha-trypsin inhibitor heavy chain H2 precursor                                  | R.NVQFNYPHTSVTDVTQNNFHNYFGGSEIVVAGK.F | 3 | 5.11 | 0.39 | -3.16 |
| IPI00305461 | Inter-alpha-trypsin inhibitor heavy chain H2 precursor                                  | R.NVQFNYPHTSVTDVTQNNFHNYFGGSEIVVAGK.F | 4 | 4.76 | 0.45 | -3.96 |
| IPI00305461 | Inter-alpha-trypsin inhibitor heavy chain H2 precursor                                  | R.SILQM*SLDHHIVTPLTSLVIENEAGDER.M     | 3 | 7.09 | 0.54 | -3.28 |
| IPI00305461 | Inter-alpha-trypsin inhibitor heavy chain H2 precursor                                  | R.SILQM*SLDHHIVTPLTSLVIENEAGDER.M     | 4 | 4.24 | 0.40 | -3.57 |
| IPI00305461 | Inter-alpha-trypsin inhibitor heavy chain H2 precursor                                  | R.SLAPATAAAKR.R                       | 2 | 2.42 | 0.12 | -2.96 |
| IPI00305461 | Inter-alpha-trypsin inhibitor heavy chain H2 precursor                                  | R.SSALDM*ENFR.T                       | 2 | 3.07 | 0.25 | -3.88 |
| IPI00305461 | Inter-alpha-trypsin inhibitor heavy chain H2 precursor                                  | R.SSALDM*ENFRTEVNVLPGAK.V             | 3 | 3.58 | 0.45 | -2.52 |
| IPI00305461 | Inter-alpha-trypsin inhibitor heavy chain H2 precursor                                  | R.TEVNVLPGAK.V                        | 1 | 2.45 | 0.22 | -4.24 |
| IPI00305461 | Inter-alpha-trypsin inhibitor heavy chain H2 precursor                                  | R.TEVNVLPGAK.V                        | 2 | 3.14 | 0.34 | -2.40 |
| IPI00305461 | Inter-alpha-trypsin inhibitor heavy chain H2 precursor                                  | W.AYLTINQLLAER.S                      | 2 | 3.75 | 0.39 | -5.25 |
| IPI00305461 | Inter-alpha-trypsin inhibitor heavy chain H2 precursor                                  | W.RNDLISATK.T                         | 2 | 3.00 | 0.24 | -1.11 |
| IPI00305833 | Smu-1 suppressor of mec-8 and unc-52 protein homolog                                    | R.AAIAQALAGEVSVVPPSR.L                | 2 | 2.26 | 0.12 |       |
| IPI00305833 | Smu-1 suppressor of mec-8 and unc-52 protein homolog                                    | R.GEWIYCVGEDFVLYCFSTVTGK.L            | 3 | 2.98 | 0.15 | -8.66 |
| IPI00305975 | Spondin-2 precursor                                                                     | K.NQYVSNGLR.D                         | 2 | 2.26 | 0.17 | -1.31 |
| IPI00305975 | Spondin-2 precursor                                                                     | K.YSITFTGK.W                          | 1 | 1.46 | 0.23 | -2.59 |
| IPI00306046 | Isoform 1 of EGF-like repeat and discoidin I-like domain-containing protein 3 precursor | K.DKVFQGNFDNDTHRK.N                   | 3 | 3.17 | 0.22 | -1.95 |
| IPI00306322 | Collagen alpha-2(IV) chain precursor                                                    | K.IAVQPGTVGPQGR.R                     | 2 | 3.47 | 0.33 | -2.25 |
| IPI00306322 | Collagen alpha-2(IV) chain precursor                                                    | K.YSFWLTTIPEQSFQGSADTLK.A             | 2 | 3.40 | 0.40 | -4.27 |

|             |                                      |                                     |   |      |      |       |
|-------------|--------------------------------------|-------------------------------------|---|------|------|-------|
| IPI00306322 | Collagen alpha-2(IV) chain precursor | R.GDPGPPGPPPVILPGMK.D               | 2 | 3.59 | 0.08 |       |
| IPI00306322 | Collagen alpha-2(IV) chain precursor | R.GLDGYGPDGPR.G                     | 2 | 2.57 | 0.31 | -2.99 |
| IPI00306322 | Collagen alpha-2(IV) chain precursor | R.GVSGFPGADGIPGHGQGGPR.G            | 3 | 1.84 | 0.12 | -1.50 |
| IPI00306322 | Collagen alpha-2(IV) chain precursor | R.RGPPGAPGEM*GPQGPPGEPGFR.G         | 3 | 3.38 | 0.29 | -4.54 |
| IPI00306332 | 60S ribosomal protein L24            | -.MKVELCSFSGYKIYPGHRR.Y             | 3 | 2.53 | 0.16 | 0.23  |
| IPI00306339 | secreted phosphoprotein 1 isoform b  | A.IPVKQADSGSSEEK.Q                  | 2 | 4.30 | 0.41 | -3.26 |
| IPI00306339 | secreted phosphoprotein 1 isoform b  | A.IPVKQADSGSSEEK.Q                  | 3 | 3.57 | 0.39 | -1.59 |
| IPI00306339 | secreted phosphoprotein 1 isoform b  | A.NDESNEHSDVIDSQELSK.V              | 2 | 5.40 | 0.44 | -3.67 |
| IPI00306339 | secreted phosphoprotein 1 isoform b  | A.NDESNEHSDVIDSQELSK.V              | 3 | 3.92 | 0.45 | -2.77 |
| IPI00306339 | secreted phosphoprotein 1 isoform b  | H.SDVIDSQELSK.V                     | 2 | 2.94 | 0.30 | -1.60 |
| IPI00306339 | secreted phosphoprotein 1 isoform b  | I.PVAQDLNAPSDWDSR.G                 | 2 | 4.56 | 0.45 | -2.57 |
| IPI00306339 | secreted phosphoprotein 1 isoform b  | I.PVKQADSGSSEEK.Q                   | 2 | 3.25 | 0.38 | -1.07 |
| IPI00306339 | secreted phosphoprotein 1 isoform b  | K.AIPVAQDLNAPSD.W                   | 2 | 3.80 | 0.53 | -3.31 |
| IPI00306339 | secreted phosphoprotein 1 isoform b  | K.AIPVAQDLNAPSDWDSR.G               | 2 | 5.21 | 0.53 | -4.53 |
| IPI00306339 | secreted phosphoprotein 1 isoform b  | K.AIPVAQDLNAPSDWDSR.G               | 3 | 4.02 | 0.40 | -3.55 |
| IPI00306339 | secreted phosphoprotein 1 isoform b  | K.ANDESNEHSDVIDSQELSK.V             | 2 | 5.61 | 0.55 | -3.29 |
| IPI00306339 | secreted phosphoprotein 1 isoform b  | K.ANDESNEHSDVIDSQELSK.V             | 3 | 4.89 | 0.34 | -3.60 |
| IPI00306339 | secreted phosphoprotein 1 isoform b  | K.DSYETSQLDDQSAETHSHK.Q             | 2 | 5.84 | 0.65 | -2.86 |
| IPI00306339 | secreted phosphoprotein 1 isoform b  | K.DSYETSQLDDQSAETHSHK.Q             | 3 | 2.98 | 0.25 | -1.85 |
| IPI00306339 | secreted phosphoprotein 1 isoform b  | K.DSYETSQLDDQSAETHSHK.Q             | 4 | 3.22 | 0.27 | -0.90 |
| IPI00306339 | secreted phosphoprotein 1 isoform b  | K.DSYETSQLDDQSAETHSHKQS.R           | 2 | 5.31 | 0.57 | -3.55 |
| IPI00306339 | secreted phosphoprotein 1 isoform b  | K.DSYETSQLDDQSAETHSHKQSR.L          | 3 | 3.78 | 0.44 | -4.42 |
| IPI00306339 | secreted phosphoprotein 1 isoform b  | K.FRISHELDSASSE.V                   | 2 | 3.47 | 0.35 | -1.77 |
| IPI00306339 | secreted phosphoprotein 1 isoform b  | K.FRISHELDSASSEVN.-                 | 2 | 4.27 | 0.49 | -4.28 |
| IPI00306339 | secreted phosphoprotein 1 isoform b  | K.FRRPDIQYPDATDEDITSHM*ESEELNGAYK.A | 4 | 4.32 | 0.48 | -2.71 |
| IPI00306339 | secreted phosphoprotein 1 isoform b  | K.QLYNKYPDAVATWLNPDPSQK.Q           | 3 | 3.40 | 0.26 | -3.78 |
| IPI00306339 | secreted phosphoprotein 1 isoform b  | K.QLYNKYPDAVATWLNPDPSQKQN.L         | 3 | 4.15 | 0.31 | -2.77 |
| IPI00306339 | secreted phosphoprotein 1 isoform b  | K.QNLLAPQTLPSK.S                    | 1 | 2.22 | 0.32 | -2.40 |
| IPI00306339 | secreted phosphoprotein 1 isoform b  | K.QNLLAPQTLPSK.S                    | 2 | 3.32 | 0.29 | -4.06 |
| IPI00306339 | secreted phosphoprotein 1 isoform b  | K.RKANDESNEHSDVIDSQELSK.V           | 3 | 4.24 | 0.40 | -4.10 |
| IPI00306339 | secreted phosphoprotein 1 isoform b  | K.RKANDESNEHSDVIDSQELSK.V           | 4 | 3.58 | 0.47 | -2.79 |
| IPI00306339 | secreted phosphoprotein 1 isoform b  | K.SKEEDKHLKF.R                      | 2 | 2.90 | 0.27 | -3.89 |
| IPI00306339 | secreted phosphoprotein 1 isoform b  | L.DDQSAETHSHK.Q                     | 2 | 3.41 | 0.34 | -3.47 |
| IPI00306339 | secreted phosphoprotein 1 isoform b  | N.DESNEHSDVIDSQELSK.V               | 2 | 5.48 | 0.49 | -3.53 |
| IPI00306339 | secreted phosphoprotein 1 isoform b  | N.EHSDVIDSQELSK.V                   | 2 | 4.20 | 0.39 | -4.84 |
| IPI00306339 | secreted phosphoprotein 1 isoform b  | P.VAQDLNAPSDWDSR.G                  | 2 | 4.52 | 0.49 | -2.52 |
| IPI00306339 | secreted phosphoprotein 1 isoform b  | R.EFHSHEFHSHED.M                    | 2 | 2.99 | 0.46 | -4.79 |
| IPI00306339 | secreted phosphoprotein 1 isoform b  | R.EFHSHEFHSHEDM*LVVDPK.S            | 2 | 2.30 | 0.41 | -3.82 |
| IPI00306339 | secreted phosphoprotein 1 isoform b  | R.EFHSHEFHSHEDM*LVVDPK.S            | 3 | 2.79 | 0.21 | -4.47 |
| IPI00306339 | secreted phosphoprotein 1 isoform b  | R.EFHSHEFHSHEDM*LVVDPK.S            | 4 | 2.23 | 0.11 | -2.53 |
| IPI00306339 | secreted phosphoprotein 1 isoform b  | R.GDSVYGLR.S                        | 1 | 1.96 | 0.31 | -2.54 |
| IPI00306339 | secreted phosphoprotein 1 isoform b  | R.GDSVYGLR.S                        | 2 | 3.38 | 0.24 | -3.18 |

|             |                                                                                   |                                   |   |      |      |       |
|-------------|-----------------------------------------------------------------------------------|-----------------------------------|---|------|------|-------|
| IPI00306339 | secreted phosphoprotein 1 isoform b                                               | R.GKDSYETSQLDDQSAETH.S            | 3 | 3.98 | 0.35 | -1.82 |
| IPI00306339 | secreted phosphoprotein 1 isoform b                                               | R.GKDSYETSQLDDQSAETHS.H           | 2 | 6.10 | 0.61 | -1.71 |
| IPI00306339 | secreted phosphoprotein 1 isoform b                                               | R.GKDSYETSQLDDQSAETHS.H           | 3 | 3.58 | 0.40 | -2.88 |
| IPI00306339 | secreted phosphoprotein 1 isoform b                                               | R.GKDSYETSQLDDQSAETHSH.K          | 3 | 5.23 | 0.50 | -2.21 |
| IPI00306339 | secreted phosphoprotein 1 isoform b                                               | R.GKDSYETSQLDDQSAETHSHK.Q         | 2 | 6.71 | 0.52 | -2.98 |
| IPI00306339 | secreted phosphoprotein 1 isoform b                                               | R.GKDSYETSQLDDQSAETHSHK.Q         | 3 | 6.02 | 0.59 | -4.98 |
| IPI00306339 | secreted phosphoprotein 1 isoform b                                               | R.GKDSYETSQLDDQSAETHSHK.Q         | 4 | 3.89 | 0.25 | -2.95 |
| IPI00306339 | secreted phosphoprotein 1 isoform b                                               | R.GKDSYETSQLDDQSAETHSHK.Q         | 5 | 2.86 | 0.32 | 0.25  |
| IPI00306339 | secreted phosphoprotein 1 isoform b                                               | R.GKDSYETSQLDDQSAETHSHKQ.S        | 2 | 5.03 | 0.53 | -3.50 |
| IPI00306339 | secreted phosphoprotein 1 isoform b                                               | R.GKDSYETSQLDDQSAETHSHKQ.S        | 3 | 5.41 | 0.55 | -3.11 |
| IPI00306339 | secreted phosphoprotein 1 isoform b                                               | R.GKDSYETSQLDDQSAETHSHKQS.R       | 2 | 6.09 | 0.58 | -3.46 |
| IPI00306339 | secreted phosphoprotein 1 isoform b                                               | R.GKDSYETSQLDDQSAETHSHKQS.R       | 3 | 6.61 | 0.56 | -4.74 |
| IPI00306339 | secreted phosphoprotein 1 isoform b                                               | R.ISHELDSASS.E                    | 1 | 2.13 | 0.46 | -2.76 |
| IPI00306339 | secreted phosphoprotein 1 isoform b                                               | R.ISHELDSASSE.V                   | 1 | 2.80 | 0.42 | -4.07 |
| IPI00306339 | secreted phosphoprotein 1 isoform b                                               | R.ISHELDSASSE.V                   | 2 | 3.11 | 0.28 | -2.99 |
| IPI00306339 | secreted phosphoprotein 1 isoform b                                               | R.ISHELDSASSEVN.-                 | 1 | 4.12 | 0.49 | -4.10 |
| IPI00306339 | secreted phosphoprotein 1 isoform b                                               | R.ISHELDSASSEVN.-                 | 2 | 3.69 | 0.44 | -4.48 |
| IPI00306339 | secreted phosphoprotein 1 isoform b                                               | R.KANDESNEHSDVIDSQELSK.V          | 2 | 5.74 | 0.57 | -5.59 |
| IPI00306339 | secreted phosphoprotein 1 isoform b                                               | R.KANDESNEHSDVIDSQELSK.V          | 3 | 6.60 | 0.56 | -4.99 |
| IPI00306339 | secreted phosphoprotein 1 isoform b                                               | R.RPDIQYPDATDEDITSHM*ESEEL.L      | 3 | 4.37 | 0.38 | -3.52 |
| IPI00306339 | secreted phosphoprotein 1 isoform b                                               | R.RPDIQYPDATDEDITSHM*ESEELNGAYK.A | 3 | 6.46 | 0.61 | -2.73 |
| IPI00306339 | secreted phosphoprotein 1 isoform b                                               | R.RPDIQYPDATDEDITSHM*ESEELNGAYK.A | 4 | 5.82 | 0.51 | -2.59 |
| IPI00306339 | secreted phosphoprotein 1 isoform b                                               | S.DVIDSQELSK.V                    | 2 | 3.12 | 0.30 | -2.68 |
| IPI00306339 | secreted phosphoprotein 1 isoform b                                               | T.SQLDDQSAETHSHK.Q                | 2 | 3.02 | 0.30 | -2.21 |
| IPI00306339 | secreted phosphoprotein 1 isoform b                                               | V.AQDLNAPSDWDSR.G                 | 2 | 3.84 | 0.43 | -4.37 |
| IPI00306339 | secreted phosphoprotein 1 isoform b                                               | W.LNPDPSQKQNLAPQTLPSK.S           | 3 | 4.49 | 0.36 | -2.36 |
| IPI00306413 | Tubulin polymerization-promoting protein family member 3                          | K.ALEELATKR.F                     | 2 | 2.32 | 0.12 | -2.54 |
| IPI00306549 | CDNA FLJ11065 fis, clone PLACE1004868, weakly similar to MALE STERILITY PROTEIN 2 | R.NIHYLFNTALFLIAWRLLIAR.S         | 2 | 1.01 | 0.08 | -7.09 |
| IPI00306576 | Arylsulfatase B precursor                                                         | R.DGEEVATGYK.N                    | 2 | 2.69 | 0.31 | -2.94 |
| IPI00306576 | Arylsulfatase B precursor                                                         | R.GVGFVASPLLK.Q                   | 2 | 3.25 | 0.27 | -2.48 |
| IPI00306710 | Isoform 1 of Chordin precursor                                                    | K.GFYGSEAQGVVK.D                  | 2 | 3.13 | 0.39 | -1.83 |
| IPI00306710 | Isoform 1 of Chordin precursor                                                    | K.GFYGSEAQGVVKDLEPELLR.H          | 3 | 3.04 | 0.26 | -2.10 |
| IPI00306710 | Isoform 1 of Chordin precursor                                                    | R.CVLCACEAPQWGR.R                 | 2 | 2.71 | 0.17 |       |
| IPI00306710 | Isoform 1 of Chordin precursor                                                    | R.LQILHQQQLLR.E                   | 3 | 2.57 | 0.17 | -3.18 |
| IPI00306710 | Isoform 1 of Chordin precursor                                                    | R.QLPGHCCQTCPQER.S                | 3 | 2.54 | 0.22 |       |
| IPI00306844 | Corticotropin-releasing factor-binding protein precursor                          | K.VFDGWILK.G                      | 2 | 2.64 | 0.13 | -1.45 |
| IPI00306844 | Corticotropin-releasing factor-binding protein precursor                          | R.SSQNVAM*IFFR.V                  | 2 | 2.52 | 0.27 | -2.81 |
| IPI00306850 | EGF-like-domain, multiple 3                                                       | R.GYELDTDQR.T                     | 2 | 2.53 | 0.30 | -3.90 |



|             |                                                                                                                        |                                         |   |      |      |       |
|-------------|------------------------------------------------------------------------------------------------------------------------|-----------------------------------------|---|------|------|-------|
| IPI00306853 | Carbohydrate sulfotransferase 3                                                                                        | R.SVSLLEER.G                            | 2 | 2.45 | 0.13 | -2.39 |
| IPI00306884 | CDNA FLJ11867 fis, clone HEMBA1006976, weakly similar to H.sapiens Gal-beta(1-3/1-4)GlcNAc alpha-2.3-sialyltransferase | K.NIQRLNNAPVAGYEGDVGSKTTM*R.L           | 5 | 2.26 | 0.12 | -7.74 |
| IPI00306959 | Keratin, type II cytoskeletal 7                                                                                        | K.LLEGEESR.I                            | 2 | 2.26 | 0.06 | -3.07 |
| IPI00307276 | ADAMTS-4 precursor                                                                                                     | K.APLGSPSPRPR.R                         | 2 | 3.08 | 0.21 | -2.39 |
| IPI00307276 | ADAMTS-4 precursor                                                                                                     | R.GAELHLQPLEGGTPNSAGGPGAHILR.R          | 2 | 5.44 | 0.55 | -3.92 |
| IPI00307276 | ADAMTS-4 precursor                                                                                                     | R.GAELHLQPLEGGTPNSAGGPGAHILR.R          | 3 | 6.84 | 0.56 | -4.76 |
| IPI00307276 | ADAMTS-4 precursor                                                                                                     | R.GAELHLQPLEGGTPNSAGGPGAHILR.R          | 4 | 3.99 | 0.24 | -3.86 |
| IPI00307276 | ADAMTS-4 precursor                                                                                                     | R.GAELHLQPLEGGTPNSAGGPGAHILRR.K         | 3 | 2.74 | 0.19 | -4.20 |
| IPI00307591 | Zinc finger protein 609                                                                                                | K.MEGLLNGSSDPHQSR.L                     | 2 | 2.31 | 0.10 |       |
| IPI00307592 | ATP-binding cassette, sub-family A, member 2 isoform a                                                                 | L.SAGPGTSGSHLDR.S                       | 2 | 3.29 | 0.43 | -3.39 |
| IPI00307592 | ATP-binding cassette, sub-family A, member 2 isoform a                                                                 | R.DAVCSGQAAAR.A                         | 2 | 3.05 | 0.25 | -2.28 |
| IPI00307592 | ATP-binding cassette, sub-family A, member 2 isoform a                                                                 | R.DAVCSGQAAARA.R                        | 2 | 3.72 | 0.41 | -3.22 |
| IPI00307592 | ATP-binding cassette, sub-family A, member 2 isoform a                                                                 | R.FSGLSAELR.N                           | 2 | 2.39 | 0.19 | -1.24 |
| IPI00307592 | ATP-binding cassette, sub-family A, member 2 isoform a                                                                 | R.ILTVPESQK.G                           | 1 | 2.19 | 0.07 | -1.84 |
| IPI00307592 | ATP-binding cassette, sub-family A, member 2 isoform a                                                                 | R.ILTVPESQK.G                           | 2 | 2.34 | 0.08 | -1.18 |
| IPI00307611 | Isoform 1 of Microtubule-associated serine/threonine-protein kinase 4                                                  | K.QTLSPKHPKPSTVK.D                      | 2 | 2.70 | 0.06 |       |
| IPI00307612 | Cadherin-20 precursor                                                                                                  | K.IQDINDNEPK.F                          | 2 | 3.38 | 0.25 | -3.72 |
| IPI00307702 | H53_GS1 (Fragment)                                                                                                     | R.EMDAAGFDFSLPCTQKLTQNGTR.S             | 3 | 2.96 | 0.10 | 1.18  |
| IPI00307729 | ADAMTS-3 precursor                                                                                                     | R.YREVELVTPVSTNLEGR.Y                   | 3 | 2.59 | 0.09 | -3.65 |
| IPI00328113 | Fibrillin-1 precursor                                                                                                  | G.ADANLEAGNVK.E                         | 2 | 3.34 | 0.34 | -1.45 |
| IPI00328113 | Fibrillin-1 precursor                                                                                                  | K.GYILQEDGR.S                           | 2 | 2.78 | 0.19 | -2.41 |
| IPI00328113 | Fibrillin-1 precursor                                                                                                  | K.ILCPGGEGFRPNPITVILEDIDECQELPGLCQGGK.C | 3 | 4.31 | 0.44 | -3.71 |
| IPI00328113 | Fibrillin-1 precursor                                                                                                  | R.AGYQSTLTR.T                           | 2 | 3.20 | 0.26 | 0.06  |
| IPI00328113 | Fibrillin-1 precursor                                                                                                  | R.ILELLPALTTLTNHNR.Y                    | 3 | 2.92 | 0.15 | -1.66 |
| IPI00328243 | Phospholipase D3                                                                                                       | K.ALLNVVDNAR.S                          | 1 | 2.16 | 0.20 | -4.20 |
| IPI00328243 | Phospholipase D3                                                                                                       | K.ALLNVVDNAR.S                          | 2 | 3.71 | 0.30 | -2.64 |
| IPI00328243 | Phospholipase D3                                                                                                       | K.LFVVPADAEQAR.I                        | 2 | 3.44 | 0.28 | -3.38 |
| IPI00328243 | Phospholipase D3                                                                                                       | K.LTHGVLHTK.F                           | 2 | 2.18 | 0.11 | -2.26 |
| IPI00328243 | Phospholipase D3                                                                                                       | R.IAVSKPSGPQPQADLQALLQSGAQVR.M          | 3 | 5.35 | 0.40 | -2.75 |
| IPI00328243 | Phospholipase D3                                                                                                       | R.IAVSKPSGPQPQADLQALLQSGAQVR.M          | 4 | 3.08 | 0.13 | -2.78 |
| IPI00328243 | Phospholipase D3                                                                                                       | R.SQLEAIFLR.D                           | 2 | 3.67 | 0.28 | -2.14 |
| IPI00328257 | Isoform A of AP-1 complex subunit beta-1                                                                               | K.DIPNENEAQFQIR.D                       | 2 | 3.75 | 0.30 | -4.40 |
| IPI00328257 | Isoform A of AP-1 complex subunit beta-1                                                                               | K.LQSSNIFTVAK.R                         | 2 | 2.10 | 0.12 | -3.05 |

|             |                                                              |                                              |   |      |      |       |
|-------------|--------------------------------------------------------------|----------------------------------------------|---|------|------|-------|
| IPI00328257 | Isoform A of AP-1 complex subunit beta-1                     | K.M*EPLNNLQVAVK.N                            | 2 | 3.13 | 0.30 | -3.02 |
| IPI00328257 | Isoform A of AP-1 complex subunit beta-1                     | K.RNVEGQDM*LYQSLK.L                          | 3 | 2.64 | 0.29 | -1.14 |
| IPI00328257 | Isoform A of AP-1 complex subunit beta-1                     | R.NSFG LAPAAPLQVHAPLSPNQTV EISLPLSTVGSVM*K.M | 3 | 4.93 | 0.52 | -4.57 |
| IPI00328257 | Isoform A of AP-1 complex subunit beta-1                     | R.NVEGQDM*LYQSLK.L                           | 2 | 3.99 | 0.46 | -3.71 |
| IPI00328260 | Protein FAN                                                  | K.VWVGVAEM*PGTK.R                            | 2 | 2.12 | 0.19 |       |
| IPI00328270 | Neuronal PAS domain-containing protein 2                     | R.DQFNVLKELSSMLPGNTRK.M                      | 3 | 3.76 | 0.06 |       |
| IPI00328298 | Isoform 2 of Structural maintenance of chromosomes protein 4 | R.AQKIRSKKLSVLIHNSDEHK.D                     | 3 | 2.30 | 0.14 | -3.01 |
| IPI00328361 | Seryl-tRNA synthetase, mitochondrial precursor               | R.RSFTTEKRNRLLYEYAR.E                        | 3 | 3.56 | 0.13 |       |
| IPI00328391 | N-acetylgalactosaminyltransferase 7                          | K.AKPLVLGPEFK.Q                              | 1 | 2.52 | 0.29 | -5.07 |
| IPI00328391 | N-acetylgalactosaminyltransferase 7                          | K.AKPLVLGPEFK.Q                              | 3 | 1.88 | 0.12 | -6.10 |
| IPI00328391 | N-acetylgalactosaminyltransferase 7                          | K.EPEPPGVVGGPGEK.A                           | 2 | 2.80 | 0.36 | -3.35 |
| IPI00328391 | N-acetylgalactosaminyltransferase 7                          | K.NVDWGEIR.G                                 | 2 | 2.99 | 0.18 | -1.91 |
| IPI00328391 | N-acetylgalactosaminyltransferase 7                          | K.RVPLTPQEK.R                                | 2 | 2.45 | 0.16 | -2.30 |
| IPI00328391 | N-acetylgalactosaminyltransferase 7                          | K.WFM*EEIAYDITSHYLPK.N                       | 3 | 4.06 | 0.43 | -2.75 |
| IPI00328391 | N-acetylgalactosaminyltransferase 7                          | R.DVNDPM*PNR.G                               | 2 | 2.52 | 0.14 | -2.95 |
| IPI00328391 | N-acetylgalactosaminyltransferase 7                          | R.FTHIPSGK.C                                 | 1 | 1.71 | 0.13 | -4.35 |
| IPI00328391 | N-acetylgalactosaminyltransferase 7                          | R.GFETAYCIDSM*GK.T                           | 2 | 4.10 | 0.54 | -4.49 |
| IPI00328391 | N-acetylgalactosaminyltransferase 7                          | R.INEANQLM*QYDQCLTK.G                        | 2 | 5.70 | 0.54 | -3.10 |
| IPI00328391 | N-acetylgalactosaminyltransferase 7                          | R.KYLAEIVLIDDFSKEHLK.E                       | 4 | 3.14 | 0.08 | -3.37 |
| IPI00328391 | N-acetylgalactosaminyltransferase 7                          | R.M*GGNQLFR.I                                | 2 | 3.00 | 0.21 | -1.83 |
| IPI00328391 | N-acetylgalactosaminyltransferase 7                          | R.SEVLHQVFISNCDSSK.T                         | 3 | 3.56 | 0.33 | -2.22 |
| IPI00328391 | N-acetylgalactosaminyltransferase 7                          | R.SPAM*AGGLFAIER.E                           | 2 | 3.67 | 0.36 | -2.34 |
| IPI00328431 | Isoform 1 of Netrin receptor UNC5B precursor                 | K.CNGE WV SQNDHV TQEGLDEATGLR.V              | 3 | 4.72 | 0.45 | -2.66 |
| IPI00328431 | Isoform 1 of Netrin receptor UNC5B precursor                 | K.NEDVIDPTQDTNFLLTIDHNLIR.Q                  | 3 | 2.95 | 0.14 | -6.43 |
| IPI00328488 | Isoform 1 of Epididymis-specific alpha-mannosidase precursor | K.QGPISDNLYFTP GK.A                          | 2 | 3.51 | 0.37 | -3.91 |
| IPI00328488 | Isoform 1 of Epididymis-specific alpha-mannosidase precursor | R.AYAANVYTSVVEELAR.G                         | 2 | 3.76 | 0.51 | -3.64 |
| IPI00328488 | Isoform 1 of Epididymis-specific alpha-mannosidase precursor | R.DM*YATHLASGM*LGVR.K                        | 2 | 2.95 | 0.48 | -2.55 |
| IPI00328488 | Isoform 1 of Epididymis-specific alpha-mannosidase precursor | R.FIAVEQEFFR.L                               | 2 | 3.80 | 0.40 | -3.44 |
| IPI00328488 | Isoform 1 of Epididymis-specific alpha-mannosidase precursor | R.IEQEYQAGPLELNR.E                           | 2 | 4.31 | 0.19 | -3.64 |
| IPI00328488 | Isoform 1 of Epididymis-specific alpha-mannosidase precursor | R.RASALLYAGESM*FTR.Y                         | 3 | 2.71 | 0.18 | -0.90 |
| IPI00328488 | Isoform 1 of Epididymis-specific alpha-mannosidase precursor | R.SALALQHRPVVLFGLAGTAPK.L                    | 3 | 5.93 | 0.48 | -1.28 |
| IPI00328488 | Isoform 1 of Epididymis-specific alpha-mannosidase precursor | R.TFFIHQQQ.-                                 | 2 | 2.76 | 0.33 | -1.63 |
| IPI00328520 | Isoform 2 of Proline-rich transmembrane protein 2            | K.AGLAPETTETPAGASETAQATDLSLSPGGESK.A         | 2 | 4.64 | 0.55 | -4.11 |

|             |                                                   |                                      |   |      |      |       |
|-------------|---------------------------------------------------|--------------------------------------|---|------|------|-------|
| IPI00328520 | Isoform 2 of Proline-rich transmembrane protein 2 | K.AGLAPETTETPAGASETAQATDLSLSPGGESK.A | 3 | 3.61 | 0.46 | -2.78 |
| IPI00328520 | Isoform 2 of Proline-rich transmembrane protein 2 | L.AGVDPQPEAPQPGPNTTAAAPVDVSGPK.A     | 2 | 3.97 | 0.47 | -2.84 |
| IPI00328522 | KTEL motif-containing protein 1                   | R.KNTKLVDAEYTK.N                     | 2 | 2.62 | 0.12 |       |
| IPI00328550 | Thrombospondin-4 precursor                        | K.DVDIDSYPEELPCSAR.N                 | 2 | 3.13 | 0.40 |       |
| IPI00328550 | Thrombospondin-4 precursor                        | R.AFAGPSQKPETIELR.T                  | 2 | 2.50 | 0.20 |       |
| IPI00328550 | Thrombospondin-4 precursor                        | R.AFAGPSQKPETIELR.T                  | 3 | 2.16 | 0.16 | -1.91 |
| IPI00328550 | Thrombospondin-4 precursor                        | R.AVAEPGIQLK.A                       | 1 | 2.29 | 0.16 | -3.43 |
| IPI00328550 | Thrombospondin-4 precursor                        | R.AVAEPGIQLK.A                       | 2 | 2.38 | 0.20 | -2.73 |
| IPI00328550 | Thrombospondin-4 precursor                        | R.KPQDFLEELK.L                       | 2 | 2.64 | 0.15 | -1.99 |
| IPI00328550 | Thrombospondin-4 precursor                        | R.KPQDFLEELKLVVR.G                   | 3 | 3.53 | 0.19 | -1.04 |
| IPI00328550 | Thrombospondin-4 precursor                        | R.KPQDFLEELKLVVR.G                   | 4 | 2.59 | 0.12 | -0.87 |
| IPI00328550 | Thrombospondin-4 precursor                        | R.LNPGALLPVLTDPALNDLYVISTFK.L        | 3 | 4.38 | 0.57 | -4.04 |
| IPI00328550 | Thrombospondin-4 precursor                        | R.QFLGQM*TQLNQLLGEVK.D               | 2 | 3.94 | 0.31 | -4.87 |
| IPI00328587 | Enolase                                           | K.KLMVTEQEK.I                        | 2 | 2.25 | 0.12 | -1.08 |
| IPI00328587 | Enolase                                           | K.LM*IEM*DGTENK.S                    | 2 | 2.73 | 0.23 | -3.68 |
| IPI00328609 | Kallistatin precursor                             | K.ATLDVDEAGTEAAAATSFAIK.F            | 2 | 6.29 | 0.58 | -4.18 |
| IPI00328609 | Kallistatin precursor                             | K.ATLDVDEAGTEAAAATSFAIKFFSAQTNR.H    | 3 | 4.53 | 0.52 | -4.11 |
| IPI00328609 | Kallistatin precursor                             | K.DFYVDENTTVR.V                      | 2 | 3.50 | 0.38 | -2.64 |
| IPI00328609 | Kallistatin precursor                             | K.FFSAQTNR.H                         | 1 | 1.91 | 0.09 | 0.90  |
| IPI00328609 | Kallistatin precursor                             | K.FFSAQTNR.H                         | 2 | 2.82 | 0.16 | 2.52  |
| IPI00328609 | Kallistatin precursor                             | K.FSISGSYVLDQILPR.L                  | 2 | 4.75 | 0.40 | -4.62 |
| IPI00328609 | Kallistatin precursor                             | K.FSISGSYVLDQILPR.L                  | 3 | 5.05 | 0.33 | -3.37 |
| IPI00328609 | Kallistatin precursor                             | K.GDATVFFILPNQGK.M                   | 2 | 3.77 | 0.28 | -3.71 |
| IPI00328609 | Kallistatin precursor                             | K.IAPANADFAFR.F                      | 1 | 2.49 | 0.28 | -3.31 |
| IPI00328609 | Kallistatin precursor                             | K.IAPANADFAFR.F                      | 2 | 3.00 | 0.45 | -3.37 |
| IPI00328609 | Kallistatin precursor                             | K.IVDLVSELKK.D                       | 2 | 2.95 | 0.30 | -2.96 |
| IPI00328609 | Kallistatin precursor                             | K.LFHNTNFYDTVGTIQLINDHVK.K           | 2 | 6.05 | 0.49 | -4.09 |
| IPI00328609 | Kallistatin precursor                             | K.LFHNTNFYDTVGTIQLINDHVK.K           | 3 | 4.83 | 0.49 | -5.97 |
| IPI00328609 | Kallistatin precursor                             | K.LFHNTNFYDTVGTIQLINDHVK.K           | 4 | 3.61 | 0.34 | -4.23 |
| IPI00328609 | Kallistatin precursor                             | K.M*REIEEVLTPEM*LM*R.W               | 2 | 1.54 | 0.10 | -3.39 |
| IPI00328609 | Kallistatin precursor                             | K.VVDPTKP.-                          | 1 | 1.59 | 0.06 | -3.66 |
| IPI00328609 | Kallistatin precursor                             | K.WADLSGITK.Q                        | 1 | 1.79 | 0.05 | -3.32 |
| IPI00328609 | Kallistatin precursor                             | K.WADLSGITK.Q                        | 2 | 3.00 | 0.24 | -2.00 |
| IPI00328609 | Kallistatin precursor                             | R.EIEEVLTPEM*LM*R.W                  | 2 | 4.09 | 0.42 | -4.53 |
| IPI00328609 | Kallistatin precursor                             | R.FYLIASETPGK.N                      | 2 | 4.15 | 0.42 | -5.15 |
| IPI00328609 | Kallistatin precursor                             | R.GKIVDLVSELKK.D                     | 2 | 3.69 | 0.33 | -4.05 |
| IPI00328609 | Kallistatin precursor                             | R.GKIVDLVSELKK.D                     | 3 | 4.62 | 0.38 | -3.68 |
| IPI00328609 | Kallistatin precursor                             | R.LGFTDLFSK.W                        | 1 | 2.38 | 0.15 | -4.02 |
| IPI00328609 | Kallistatin precursor                             | R.LGFTDLFSK.W                        | 2 | 3.20 | 0.34 | -2.33 |
| IPI00328609 | Kallistatin precursor                             | R.M*DYKGDATVFFILPNQGK.M              | 2 | 4.58 | 0.51 | -3.78 |
| IPI00328609 | Kallistatin precursor                             | R.M*DYKGDATVFFILPNQGK.M              | 3 | 4.60 | 0.35 | -2.87 |
| IPI00328609 | Kallistatin precursor                             | R.TTPKDFYVDENTTVR.V                  | 3 | 3.45 | 0.32 | -2.91 |

|             |                                                                 |                                           |   |      |      |       |
|-------------|-----------------------------------------------------------------|-------------------------------------------|---|------|------|-------|
| IPI00328609 | Kallistatin precursor                                           | R.VGSALFLSHNLK.F                          | 2 | 3.33 | 0.26 | -2.32 |
| IPI00328609 | Kallistatin precursor                                           | R.VGSALFLSHNLK.F                          | 3 | 2.17 | 0.32 | -4.25 |
| IPI00328680 | Multiple coagulation factor deficiency protein 2 precursor      | A.EEPAASFSQPGSM*GLDK.N                    | 2 | 4.76 | 0.54 | -4.26 |
| IPI00328680 | Multiple coagulation factor deficiency protein 2 precursor      | K.NTVHDQEHEM*EHLEGVINKPEAEM*SPQELQLHYFK.M | 4 | 4.85 | 0.35 | -2.83 |
| IPI00328680 | Multiple coagulation factor deficiency protein 2 precursor      | K.NTVHDQEHEM*EHLEGVINKPEAEM*SPQELQLHYFK.M | 5 | 3.80 | 0.31 | -3.76 |
| IPI00328680 | Multiple coagulation factor deficiency protein 2 precursor      | K.NTVHDQEHEM*EHLEGVINKPEAEM*SPQELQLHYFK.M | 6 | 3.53 | 0.28 | -1.12 |
| IPI00328703 | Out at first protein homolog precursor                          | K.ASEQAELPR.C                             | 2 | 2.48 | 0.13 | 0.92  |
| IPI00328703 | Out at first protein homolog precursor                          | K.GSQFQALCFVTQLQHNEIIPSEAM*AK.L           | 3 | 4.38 | 0.41 | -0.36 |
| IPI00328703 | Out at first protein homolog precursor                          | R.FWLEQGVDSVFEALPK.A                      | 2 | 5.39 | 0.30 |       |
| IPI00328709 | Gremlin-2 precursor                                             | K.NRPAGAIPSPYK.D                          | 2 | 2.17 | 0.19 | -4.01 |
| IPI00328745 | Reticulon-4 receptor-like 1 precursor                           | K.LHALYLYK.C                              | 2 | 2.14 | 0.20 | -1.68 |
| IPI00328745 | Reticulon-4 receptor-like 1 precursor                           | K.LWLSLPGTFR.G                            | 2 | 2.96 | 0.30 | -2.31 |
| IPI00328745 | Reticulon-4 receptor-like 1 precursor                           | K.SHTLTTTDR.A                             | 2 | 1.72 | 0.15 | 0.55  |
| IPI00328745 | Reticulon-4 receptor-like 1 precursor                           | R.GSSSAVPCVSPGLR.H                        | 2 | 1.92 | 0.18 | -1.70 |
| IPI00328745 | Reticulon-4 receptor-like 1 precursor                           | R.TLAPETFQGLVK.L                          | 2 | 3.26 | 0.23 | -3.28 |
| IPI00328746 | Reticulon-4 receptor-like 2 precursor                           | H.LYGVAEAGAPPADPSTLYR.D                   | 2 | 4.74 | 0.46 | -4.79 |
| IPI00328746 | Reticulon-4 receptor-like 2 precursor                           | L.YGVAEAGAPPADPSTLYR.D                    | 2 | 3.48 | 0.38 | -4.83 |
| IPI00328746 | Reticulon-4 receptor-like 2 precursor                           | R.CQLSSLPGNIFR.G                          | 2 | 3.67 | 0.39 | -2.33 |
| IPI00328746 | Reticulon-4 receptor-like 2 precursor                           | R.DLPAEDSR.G                              | 1 | 1.54 | 0.09 | -4.30 |
| IPI00328746 | Reticulon-4 receptor-like 2 precursor                           | R.DLPAEDSR.G                              | 2 | 1.66 | 0.18 | -2.66 |
| IPI00328746 | Reticulon-4 receptor-like 2 precursor                           | R.HLQALEELDLGDNR.H                        | 3 | 2.69 | 0.10 | -1.78 |
| IPI00328746 | Reticulon-4 receptor-like 2 precursor                           | R.LFLQNNLIR.T                             | 2 | 3.22 | 0.12 | -2.63 |
| IPI00328746 | Reticulon-4 receptor-like 2 precursor                           | R.LLLHGNNR.L                              | 2 | 1.74 | 0.13 | -3.57 |
| IPI00328746 | Reticulon-4 receptor-like 2 precursor                           | R.LLTEHVFR.G                              | 2 | 2.49 | 0.28 | -3.60 |
| IPI00328746 | Reticulon-4 receptor-like 2 precursor                           | R.LQSLHLR.C                               | 1 | 2.15 | 0.18 | -3.76 |
| IPI00328746 | Reticulon-4 receptor-like 2 precursor                           | R.LQSLHLR.C                               | 2 | 2.33 | 0.06 | -1.75 |
| IPI00328746 | Reticulon-4 receptor-like 2 precursor                           | R.SLEPDTFQGLER.L                          | 2 | 3.53 | 0.37 | -4.37 |
| IPI00328746 | Reticulon-4 receptor-like 2 precursor                           | R.VSSSDVTCATPPER.Q                        | 2 | 3.09 | 0.40 | -4.69 |
| IPI00328746 | Reticulon-4 receptor-like 2 precursor                           | R.VSSSDVTCATPPER.Q                        | 3 | 2.19 | 0.21 | -3.79 |
| IPI00328826 | Uncharacterized protein CADPS2                                  | K.TYDTHRRRLTVEEATASVSEGGGLQGITM*K.D       | 3 | 2.59 | 0.14 | -8.06 |
| IPI00328826 | Uncharacterized protein CADPS2                                  | R.KCLEKAALINYTR.L                         | 2 | 2.06 | 0.20 |       |
| IPI00328829 | inter-alpha trypsin inhibitor heavy chain precursor 5 isoform 1 | D.PHFVDFPLSR.L                            | 1 | 2.99 | 0.28 | -3.59 |
| IPI00328829 | inter-alpha trypsin inhibitor heavy chain precursor 5 isoform 1 | D.PHFVDFPLSR.L                            | 2 | 3.87 | 0.36 | -4.64 |
| IPI00328829 | inter-alpha trypsin inhibitor heavy chain precursor 5 isoform 1 | D.PHFVDFPLSR.L                            | 3 | 3.75 | 0.30 | -2.54 |

|             |                                                                 |                           |   |      |      |       |
|-------------|-----------------------------------------------------------------|---------------------------|---|------|------|-------|
| IPI00328829 | inter-alpha trypsin inhibitor heavy chain precursor 5 isoform 1 | K.AAFFLSYEELLQR.R         | 2 | 4.19 | 0.32 | -6.66 |
| IPI00328829 | inter-alpha trypsin inhibitor heavy chain precursor 5 isoform 1 | K.AAFFLSYEELLQR.R         | 3 | 3.76 | 0.22 | -2.30 |
| IPI00328829 | inter-alpha trypsin inhibitor heavy chain precursor 5 isoform 1 | K.DHLISVTPDSIR.D          | 2 | 2.95 | 0.28 | -1.94 |
| IPI00328829 | inter-alpha trypsin inhibitor heavy chain precursor 5 isoform 1 | K.DVTGSPRPGGDGEGDTNHIER.L | 3 | 3.98 | 0.44 | -0.97 |
| IPI00328829 | inter-alpha trypsin inhibitor heavy chain precursor 5 isoform 1 | K.ELLSSWLQSDDEPEKER.L     | 2 | 4.77 | 0.44 | -2.35 |
| IPI00328829 | inter-alpha trypsin inhibitor heavy chain precursor 5 isoform 1 | K.IYNGEEQIDCFAR.N         | 2 | 4.57 | 0.46 | -3.46 |
| IPI00328829 | inter-alpha trypsin inhibitor heavy chain precursor 5 isoform 1 | K.LSLENCGLTR.R            | 2 | 2.49 | 0.16 | -1.27 |
| IPI00328829 | inter-alpha trypsin inhibitor heavy chain precursor 5 isoform 1 | K.TDVPVVRPQK.A            | 2 | 2.42 | 0.09 | -3.18 |
| IPI00328829 | inter-alpha trypsin inhibitor heavy chain precursor 5 isoform 1 | K.TSVDGDPHFVDFPLSR.L      | 3 | 3.17 | 0.40 | -2.41 |
| IPI00328829 | inter-alpha trypsin inhibitor heavy chain precursor 5 isoform 1 | K.VYIHHM*SPTGGTDINGALQR.A | 3 | 4.03 | 0.43 | -4.42 |
| IPI00328829 | inter-alpha trypsin inhibitor heavy chain precursor 5 isoform 1 | K.VYQGEITER.E             | 2 | 3.40 | 0.22 | -0.73 |
| IPI00328829 | inter-alpha trypsin inhibitor heavy chain precursor 5 isoform 1 | K.YVAHSGIGDR.S            | 1 | 2.32 | 0.28 | -5.40 |
| IPI00328829 | inter-alpha trypsin inhibitor heavy chain precursor 5 isoform 1 | K.YVAHSGIGDR.S            | 2 | 2.55 | 0.27 | -0.58 |
| IPI00328829 | inter-alpha trypsin inhibitor heavy chain precursor 5 isoform 1 | R.AQALAVSYR.F             | 1 | 2.16 | 0.16 | -3.43 |
| IPI00328829 | inter-alpha trypsin inhibitor heavy chain precursor 5 isoform 1 | R.AQALAVSYR.F             | 2 | 2.77 | 0.17 | -1.76 |
| IPI00328829 | inter-alpha trypsin inhibitor heavy chain precursor 5 isoform 1 | R.ASAVIPSQDK.A            | 2 | 2.72 | 0.23 | -2.59 |
| IPI00328829 | inter-alpha trypsin inhibitor heavy chain precursor 5 isoform 1 | R.EQSIGDIQVLNGYFVHYFAPK.D | 2 | 3.69 | 0.42 | -2.36 |
| IPI00328829 | inter-alpha trypsin inhibitor heavy chain precursor 5 isoform 1 | R.FLTPFTSM*K.L            | 1 | 1.68 | 0.19 | -2.21 |
| IPI00328829 | inter-alpha trypsin inhibitor heavy chain precursor 5 isoform 1 | R.FSIIGFSNR.I             | 2 | 3.29 | 0.29 | -1.69 |
| IPI00328829 | inter-alpha trypsin inhibitor heavy chain precursor 5 isoform 1 | R.IAQNGILGDFIIR.Y         | 2 | 4.08 | 0.40 | -3.97 |
| IPI00328829 | inter-alpha trypsin inhibitor heavy chain precursor 5 isoform 1 | R.IAQNGILGDFIIR.Y         | 3 | 4.27 | 0.31 | -2.79 |

|             |                                                                 |                                 |   |      |      |       |
|-------------|-----------------------------------------------------------------|---------------------------------|---|------|------|-------|
| IPI00328829 | inter-alpha trypsin inhibitor heavy chain precursor 5 isoform 1 | R.IDYPPSSVVQATK.T               | 2 | 3.31 | 0.37 | -3.34 |
| IPI00328829 | inter-alpha trypsin inhibitor heavy chain precursor 5 isoform 1 | R.KIYNGEEQIDCWFR.N              | 2 | 3.89 | 0.50 | -4.04 |
| IPI00328829 | inter-alpha trypsin inhibitor heavy chain precursor 5 isoform 1 | R.LTVCFNIDGQPGDILR.L            | 2 | 4.70 | 0.43 | -3.00 |
| IPI00328829 | inter-alpha trypsin inhibitor heavy chain precursor 5 isoform 1 | R.LWSYLTTK.E                    | 1 | 1.63 | 0.28 | -3.38 |
| IPI00328829 | inter-alpha trypsin inhibitor heavy chain precursor 5 isoform 1 | R.LWSYLTTK.E                    | 2 | 2.33 | 0.10 | -2.26 |
| IPI00328829 | inter-alpha trypsin inhibitor heavy chain precursor 5 isoform 1 | R.M*DGLEEAHGM*SAAM*GPEPVVQSVR.G | 3 | 6.47 | 0.57 | -2.52 |
| IPI00328829 | inter-alpha trypsin inhibitor heavy chain precursor 5 isoform 1 | R.RVHEEEDAGSQLIGFYDEIR.T        | 3 | 3.06 | 0.29 | -4.25 |
| IPI00328829 | inter-alpha trypsin inhibitor heavy chain precursor 5 isoform 1 | R.RVHEEEDAGSQLIGFYDEIR.T        | 4 | 3.92 | 0.27 | -3.97 |
| IPI00328829 | inter-alpha trypsin inhibitor heavy chain precursor 5 isoform 1 | R.SVSLIVFLTDGKPTVGETHTLK.I      | 3 | 3.66 | 0.49 | -4.68 |
| IPI00328829 | inter-alpha trypsin inhibitor heavy chain precursor 5 isoform 1 | R.SYLEITPSR.V                   | 1 | 1.93 | 0.11 | -3.19 |
| IPI00328829 | inter-alpha trypsin inhibitor heavy chain precursor 5 isoform 1 | R.SYLEITPSR.V                   | 2 | 2.90 | 0.18 | -1.63 |
| IPI00328829 | inter-alpha trypsin inhibitor heavy chain precursor 5 isoform 1 | R.TITILINKPER.S                 | 2 | 2.88 | 0.05 | -3.69 |
| IPI00328829 | inter-alpha trypsin inhibitor heavy chain precursor 5 isoform 1 | R.TPLLSDIR.I                    | 1 | 2.10 | 0.14 | -2.76 |
| IPI00328829 | inter-alpha trypsin inhibitor heavy chain precursor 5 isoform 1 | R.TPLLSDIR.I                    | 2 | 2.74 | 0.26 | -1.05 |
| IPI00328829 | inter-alpha trypsin inhibitor heavy chain precursor 5 isoform 1 | R.TPLLSDIRIDYPPSSVVQATK.T       | 3 | 3.97 | 0.39 | -1.34 |
| IPI00328829 | inter-alpha trypsin inhibitor heavy chain precursor 5 isoform 1 | R.VHEEEDAGSQLIGFYDEIR.T         | 2 | 5.62 | 0.56 | -2.43 |
| IPI00328829 | inter-alpha trypsin inhibitor heavy chain precursor 5 isoform 1 | R.VHEEEDAGSQLIGFYDEIR.T         | 3 | 3.71 | 0.29 | -2.09 |
| IPI00328829 | inter-alpha trypsin inhibitor heavy chain precursor 5 isoform 1 | R.YDVNREQSIGDIQVLNGYFVHYFAPK.D  | 4 | 3.88 | 0.25 | -2.76 |
| IPI00329332 | Syntaxin-12                                                     | K.ETNELLKELGSLPLPLSTSEQR.Q      | 2 | 3.99 | 0.48 | -1.46 |
| IPI00329332 | Syntaxin-12                                                     | K.ETNELLKELGSLPLPLSTSEQR.Q      | 3 | 3.49 | 0.19 | -3.33 |
| IPI00329332 | Syntaxin-12                                                     | R.DFSSIIQTCSGNIQR.I             | 2 | 4.96 | 0.43 | -3.29 |
| IPI00329352 | Nodal modulator 1 precursor                                     | K.FLLFSSLVTK.E                  | 2 | 2.80 | 0.27 | -3.53 |
| IPI00329352 | Nodal modulator 1 precursor                                     | K.GGDINFVFTGFSVNGK.V            | 2 | 4.41 | 0.55 | -4.71 |
| IPI00329352 | Nodal modulator 1 precursor                                     | K.GQPLGPAGVQVSLR.N              | 2 | 2.62 | 0.36 | -3.56 |

|             |                                                 |                                          |   |      |      |       |
|-------------|-------------------------------------------------|------------------------------------------|---|------|------|-------|
| IPI00329352 | Nodal modulator 1 precursor                     | K.VNAM*TFTFDNVLP GK.Y                    | 2 | 2.50 | 0.29 | -2.47 |
| IPI00329352 | Nodal modulator 1 precursor                     | K.VVLSSQDKDK.S                           | 2 | 2.64 | 0.28 | -2.45 |
| IPI00329352 | Nodal modulator 1 precursor                     | K.YQTD CAPNNGYFM*IPLYDKGDFILK.I          | 3 | 3.03 | 0.28 | -3.41 |
| IPI00329352 | Nodal modulator 1 precursor                     | R.EDGSF SFYSLPSGGYTVIPFYR.G              | 2 | 3.75 | 0.41 | -2.64 |
| IPI00329352 | Nodal modulator 1 precursor                     | V.LGQAASDNSGPEDAKR.Q                     | 2 | 3.92 | 0.46 | -2.22 |
| IPI00329482 | Isoform 1 of Laminin subunit alpha-4 precursor  | K.DVEIPLDSKPVSSWPAYFSIVK.I               | 3 | 2.85 | 0.17 | -3.59 |
| IPI00329482 | Isoform 1 of Laminin subunit alpha-4 precursor  | K.IQINNAENTM*K.S                         | 2 | 2.53 | 0.10 | -2.84 |
| IPI00329482 | Isoform 1 of Laminin subunit alpha-4 precursor  | K.LSDLQEALDQALNHVR.D                     | 3 | 4.11 | 0.32 | -3.13 |
| IPI00329482 | Isoform 1 of Laminin subunit alpha-4 precursor  | K.SLLSDVEELVEKENQASR.K                   | 3 | 3.49 | 0.40 | -2.54 |
| IPI00329482 | Isoform 1 of Laminin subunit alpha-4 precursor  | R.IRELIAQTR.S                            | 2 | 2.92 | 0.21 | -1.55 |
| IPI00329482 | Isoform 1 of Laminin subunit alpha-4 precursor  | R.TLFPVVLEQLDDYNAK.L                     | 2 | 5.06 | 0.49 | -3.56 |
| IPI00329538 | Prostasin precursor                             | K.LGAHQLD SYSEDAK.V                      | 3 | 3.34 | 0.26 | -0.42 |
| IPI00329538 | Prostasin precursor                             | K.VSTLKDIIHPHSY LQEGSQGDIALQLSRPITFSR.Y  | 4 | 3.61 | 0.28 | -3.82 |
| IPI00329593 | Isoform 2 of ADP-dependent glucokinase          | R.FFSDKETFHDI AQVASEFPGAQHYVGGNAALIGQK.F | 4 | 5.10 | 0.43 | -5.51 |
| IPI00329605 | DNA mismatch repair protein Msh3                | R.M*GAADNIYKGR.S                         | 2 | 2.08 | 0.05 | -1.35 |
| IPI00329685 | Putative uncharacterized protein DKFZp686G12235 | K.AQLDAAVTFGPSQVAR.G                     | 2 | 3.47 | 0.29 | -0.49 |
| IPI00329685 | Putative uncharacterized protein DKFZp686G12235 | R.GGLPLEEVTVAEVLAAAR.G                   | 3 | 2.96 | 0.25 | -2.38 |
| IPI00329685 | Putative uncharacterized protein DKFZp686G12235 | R.GYLTGM*AGK.W                           | 2 | 1.86 | 0.05 | -1.89 |
| IPI00329685 | Putative uncharacterized protein DKFZp686G12235 | R.QSLFFYPSYPDEVR.G                       | 2 | 4.70 | 0.46 | -3.58 |
| IPI00329685 | Putative uncharacterized protein DKFZp686G12235 | R.YM*AF AHDL M*ADAQR.Q                   | 3 | 2.91 | 0.28 |       |
| IPI00329688 | Protein YIPF3                                   | R.DIPAM*LPAAR.L                          | 1 | 1.72 | 0.14 | -4.06 |
| IPI00329688 | Protein YIPF3                                   | R.DIPAM*LPAAR.L                          | 2 | 2.19 | 0.29 | -2.86 |
| IPI00329775 | Isoform 1 of Carboxypeptidase B2 precursor      | A.FQSGQVLAALPR.T                         | 1 | 3.25 | 0.30 | -3.66 |
| IPI00329775 | Isoform 1 of Carboxypeptidase B2 precursor      | A.FQSGQVLAALPR.T                         | 2 | 3.62 | 0.37 | -3.46 |
| IPI00329775 | Isoform 1 of Carboxypeptidase B2 precursor      | K.AVASFLRR.N                             | 2 | 1.81 | 0.16 | -3.53 |
| IPI00329775 | Isoform 1 of Carboxypeptidase B2 precursor      | K.AYISM*HSYSQHIVFPYSY.T                  | 2 | 3.52 | 0.48 | -4.22 |
| IPI00329775 | Isoform 1 of Carboxypeptidase B2 precursor      | K.AYISM*HSYSQHIVFPYSYTR.S                | 3 | 4.72 | 0.43 | -3.35 |
| IPI00329775 | Isoform 1 of Carboxypeptidase B2 precursor      | K.AYISM*HSYSQHIVFPYSYTR.S                | 4 | 3.12 | 0.31 | -3.57 |
| IPI00329775 | Isoform 1 of Carboxypeptidase B2 precursor      | K.IHIGSSF EK.Y                           | 1 | 2.54 | 0.35 | -3.77 |
| IPI00329775 | Isoform 1 of Carboxypeptidase B2 precursor      | K.IHIGSSF EKYP LYVLK.V                   | 2 | 5.09 | 0.59 | -3.98 |
| IPI00329775 | Isoform 1 of Carboxypeptidase B2 precursor      | K.IHIGSSF EKYP LYVLK.V                   | 3 | 2.59 | 0.16 | -3.01 |
| IPI00329775 | Isoform 1 of Carboxypeptidase B2 precursor      | K.NAIWIDCGIHAR.E                         | 3 | 2.96 | 0.18 | -2.63 |
| IPI00329775 | Isoform 1 of Carboxypeptidase B2 precursor      | K.SKDHEELSLVASEAVR.A                     | 3 | 2.94 | 0.23 | -3.99 |
| IPI00329775 | Isoform 1 of Carboxypeptidase B2 precursor      | K.SKDHEELSLVASEAVR.A                     | 4 | 2.65 | 0.18 | -4.15 |
| IPI00329775 | Isoform 1 of Carboxypeptidase B2 precursor      | K.YPLYVLK.V                              | 2 | 1.91 | 0.07 | -2.34 |
| IPI00329775 | Isoform 1 of Carboxypeptidase B2 precursor      | K.YSFTIELR.D                             | 2 | 2.29 | 0.22 | -1.28 |
| IPI00329775 | Isoform 1 of Carboxypeptidase B2 precursor      | R.DTGTYGFLPER.Y                          | 2 | 3.88 | 0.34 | -4.39 |

|             |                                                                                                       |                                 |   |      |      |       |
|-------------|-------------------------------------------------------------------------------------------------------|---------------------------------|---|------|------|-------|
| IPI00329775 | Isoform 1 of Carboxypeptidase B2 precursor                                                            | R.EAFAAVSK.I                    | 1 | 2.04 | 0.13 | -2.97 |
| IPI00329775 | Isoform 1 of Carboxypeptidase B2 precursor                                                            | R.HPDM*LTK.I                    | 2 | 1.60 | 0.12 | -2.88 |
| IPI00329775 | Isoform 1 of Carboxypeptidase B2 precursor                                                            | R.LVDFYVM*PVVNVVDGYDYSWK.K      | 2 | 3.98 | 0.44 | -4.00 |
| IPI00329775 | Isoform 1 of Carboxypeptidase B2 precursor                                                            | R.YTHGHGSETLYLAPGGGDDWIYDLGIK.Y | 3 | 4.58 | 0.35 | -3.71 |
| IPI00329775 | Isoform 1 of Carboxypeptidase B2 precursor                                                            | R.YTHGHGSETLYLAPGGGDDWIYDLGIK.Y | 4 | 3.26 | 0.16 | -3.95 |
| IPI00329791 | cDNA FLJ78679, highly similar to Homo sapiens DEAD (Asp-Glu-Ala-Asp) box polypeptide 46 (DDX46), mRNA | K.EKTDGGESSKEKKK.D              | 2 | 3.11 | 0.09 |       |
| IPI00329801 | Annexin A5                                                                                            | K.GLGTDEESILLLTSR.S             | 3 | 2.49 | 0.21 | -3.18 |
| IPI00329801 | Annexin A5                                                                                            | K.NFATSLYSM*IK.G                | 2 | 4.02 | 0.46 | -1.11 |
| IPI00329801 | Annexin A5                                                                                            | K.VLTEIIASR.T                   | 2 | 2.95 | 0.27 | -3.84 |
| IPI00329801 | Annexin A5                                                                                            | R.DLLDDLKSELTKFEK.L             | 3 | 3.11 | 0.29 | -2.04 |
| IPI00329801 | Annexin A5                                                                                            | R.SEIDLFNIR.K                   | 2 | 2.43 | 0.22 | -2.63 |
| IPI00333126 | Leucine-rich repeat-containing protein 56                                                             | R.HPESQQEGAVAPWGPRR.V           | 2 | 2.35 | 0.13 |       |
| IPI00333140 | Delta and Notch-like epidermal growth factor-related receptor precursor                               | A.NPVPAAPLSAPGPCAAQPCR.N        | 2 | 4.50 | 0.55 | -3.55 |
| IPI00333140 | Delta and Notch-like epidermal growth factor-related receptor precursor                               | A.NPVPAAPLSAPGPCAAQPCR.N        | 3 | 3.88 | 0.41 | -2.71 |
| IPI00333140 | Delta and Notch-like epidermal growth factor-related receptor precursor                               | K.IDYCILDPCR.N                  | 1 | 2.22 | 0.26 | 0.25  |
| IPI00333140 | Delta and Notch-like epidermal growth factor-related receptor precursor                               | K.IDYCILDPCR.N                  | 2 | 3.45 | 0.42 | -2.43 |
| IPI00333140 | Delta and Notch-like epidermal growth factor-related receptor precursor                               | K.VTATGFQQCSLIDGR.S             | 2 | 4.51 | 0.44 | -3.54 |
| IPI00333140 | Delta and Notch-like epidermal growth factor-related receptor precursor                               | N.PVPAAPLSAPGPCAAQPCR.N         | 2 | 3.69 | 0.49 | -3.58 |
| IPI00333140 | Delta and Notch-like epidermal growth factor-related receptor precursor                               | R.DLVNGYECVCLAEYK.G             | 2 | 5.19 | 0.57 | -4.27 |
| IPI00333140 | Delta and Notch-like epidermal growth factor-related receptor precursor                               | R.SQATVTLPTWQPK.T               | 2 | 3.59 | 0.28 | -2.57 |
| IPI00333140 | Delta and Notch-like epidermal growth factor-related receptor precursor                               | R.SVGTSYK.C                     | 1 | 1.36 | 0.14 | -2.80 |
| IPI00333197 | Isoform 2 of GRIP and coiled-coil domain-containing protein 2                                         | K.KENIKMKQEVEDSVTKM*GDAHK.E     | 3 | 2.55 | 0.06 | -8.00 |
| IPI00333410 | Isoform 1 of Ubiquitin-conjugating enzyme E2 Q1                                                       | K.ELRDIYRSQSFK.G                | 2 | 1.92 | 0.18 |       |
| IPI00333776 | Isoform 1 of Neuronal cell adhesion molecule precursor                                                | E.PFSHYTLNVR.V                  | 2 | 3.34 | 0.37 | -2.69 |
| IPI00333776 | Isoform 1 of Neuronal cell adhesion molecule precursor                                                | H.HQTEVSGTQTTAQLK.L             | 2 | 4.78 | 0.55 | -3.18 |
| IPI00333776 | Isoform 1 of Neuronal cell adhesion molecule precursor                                                | K.AAPYWITAPQNLVLSPGEDGLICR.A    | 2 | 5.33 | 0.54 | -5.00 |



|             |                                                        |                                               |   |      |      |       |
|-------------|--------------------------------------------------------|-----------------------------------------------|---|------|------|-------|
| IPI00333776 | Isoform 1 of Neuronal cell adhesion molecule precursor | K.AAPYWITAPQNLVLSPGEDGTLICR.A                 | 3 | 6.05 | 0.45 | -4.91 |
| IPI00333776 | Isoform 1 of Neuronal cell adhesion molecule precursor | K.AAPYWITAPQNLVLSPGEDGTLICR.A                 | 4 | 4.08 | 0.32 | -4.52 |
| IPI00333776 | Isoform 1 of Neuronal cell adhesion molecule precursor | K.AETYEGVYQCTAR.N                             | 2 | 4.85 | 0.53 | -3.95 |
| IPI00333776 | Isoform 1 of Neuronal cell adhesion molecule precursor | K.ASEPDKNPTAVEGLGSEPDNLVITWKPLNGFESNGPGLQYK.V | 3 | 6.19 | 0.51 | -1.26 |
| IPI00333776 | Isoform 1 of Neuronal cell adhesion molecule precursor | K.ASEPDKNPTAVEGLGSEPDNLVITWKPLNGFESNGPGLQYK.V | 4 | 5.14 | 0.41 | -3.83 |
| IPI00333776 | Isoform 1 of Neuronal cell adhesion molecule precursor | K.DNRELPSDER.F                                | 2 | 2.26 | 0.08 | -1.16 |
| IPI00333776 | Isoform 1 of Neuronal cell adhesion molecule precursor | K.DSTGTYTCVAR.N                               | 1 | 2.43 | 0.41 | -2.36 |
| IPI00333776 | Isoform 1 of Neuronal cell adhesion molecule precursor | K.DSTGTYTCVAR.N                               | 2 | 4.21 | 0.47 | -4.76 |
| IPI00333776 | Isoform 1 of Neuronal cell adhesion molecule precursor | K.EDGM*LPK.N                                  | 1 | 1.38 | 0.11 | -1.82 |
| IPI00333776 | Isoform 1 of Neuronal cell adhesion molecule precursor | K.EELRGNVLSLECIAEGLPTPIYWAK.E                 | 3 | 4.42 | 0.34 | -5.09 |
| IPI00333776 | Isoform 1 of Neuronal cell adhesion molecule precursor | K.EKLEPITLQSGQSLVLP CRPP IGLPPPIIFWM*DNSFQR.L | 3 | 4.40 | 0.55 | -0.96 |
| IPI00333776 | Isoform 1 of Neuronal cell adhesion molecule precursor | K.EKLEPITLQSGQSLVLP CRPP IGLPPPIIFWM*DNSFQR.L | 4 | 6.08 | 0.49 | -4.94 |
| IPI00333776 | Isoform 1 of Neuronal cell adhesion molecule precursor | K.EKLEPITLQSGQSLVLP CRPP IGLPPPIIFWM*DNSFQR.L | 5 | 3.82 | 0.17 | -0.45 |
| IPI00333776 | Isoform 1 of Neuronal cell adhesion molecule precursor | K.FIIEYEDAM*HKPGLWHHQTEVSGTQTTAQLK.L          | 3 | 6.10 | 0.54 | -5.04 |
| IPI00333776 | Isoform 1 of Neuronal cell adhesion molecule precursor | K.FIIEYEDAM*HKPGLWHHQTEVSGTQTTAQLK.L          | 4 | 5.77 | 0.46 | -4.49 |
| IPI00333776 | Isoform 1 of Neuronal cell adhesion molecule precursor | K.FYFYAQTSAGSGSQITEEAVTTVDEAGILPPDVGAGK.V     | 3 | 2.99 | 0.23 | -2.15 |
| IPI00333776 | Isoform 1 of Neuronal cell adhesion molecule precursor | K.FYFYAQTSAGSGSQITEEAVTTVDEAGILPPDVGAGK.V     | 4 | 3.11 | 0.13 | -3.74 |
| IPI00333776 | Isoform 1 of Neuronal cell adhesion molecule precursor | K.GEGPASPDRVFNTPEGVPSAPSSLK.I                 | 2 | 3.70 | 0.41 | -3.01 |
| IPI00333776 | Isoform 1 of Neuronal cell adhesion molecule precursor | K.GEGPASPDRVFNTPEGVPSAPSSLK.I                 | 3 | 4.79 | 0.43 | -2.81 |
| IPI00333776 | Isoform 1 of Neuronal cell adhesion molecule precursor | K.IDGDTIIFSNVQER.S                            | 2 | 5.23 | 0.46 | -3.56 |
| IPI00333776 | Isoform 1 of Neuronal cell adhesion molecule precursor | K.IDGDTIIFSNVQER.S                            | 3 | 5.17 | 0.30 | -0.47 |

|             |                                                        |                                    |   |      |      |       |
|-------------|--------------------------------------------------------|------------------------------------|---|------|------|-------|
| IPI00333776 | Isoform 1 of Neuronal cell adhesion molecule precursor | K.ILTFQGSK.T                       | 2 | 2.22 | 0.13 | -2.25 |
| IPI00333776 | Isoform 1 of Neuronal cell adhesion molecule precursor | K.IVNPTLDSLTLLEWDPPSHPNGILTEYTLK.Y | 2 | 4.84 | 0.53 | -3.73 |
| IPI00333776 | Isoform 1 of Neuronal cell adhesion molecule precursor | K.IVNPTLDSLTLLEWDPPSHPNGILTEYTLK.Y | 3 | 5.21 | 0.51 | -4.58 |
| IPI00333776 | Isoform 1 of Neuronal cell adhesion molecule precursor | K.IVNPTLDSLTLLEWDPPSHPNGILTEYTLK.Y | 4 | 4.06 | 0.30 | -3.90 |
| IPI00333776 | Isoform 1 of Neuronal cell adhesion molecule precursor | K.KILTFQGSK.T                      | 1 | 2.83 | 0.24 | -4.92 |
| IPI00333776 | Isoform 1 of Neuronal cell adhesion molecule precursor | K.LLEDLVQPPTITQQSPK.D              | 2 | 4.51 | 0.43 | -4.96 |
| IPI00333776 | Isoform 1 of Neuronal cell adhesion molecule precursor | K.LLEDLVQPPTITQQSPK.D              | 3 | 4.30 | 0.37 | -3.08 |
| IPI00333776 | Isoform 1 of Neuronal cell adhesion molecule precursor | K.LLEDLVQPPTITQQSPKDYIIDPR.E       | 2 | 2.14 | 0.21 | -3.78 |
| IPI00333776 | Isoform 1 of Neuronal cell adhesion molecule precursor | K.LLEDLVQPPTITQQSPKDYIIDPR.E       | 4 | 3.68 | 0.21 | -4.15 |
| IPI00333776 | Isoform 1 of Neuronal cell adhesion molecule precursor | K.LSPYVNYSFR.V                     | 1 | 2.03 | 0.14 | -2.76 |
| IPI00333776 | Isoform 1 of Neuronal cell adhesion molecule precursor | K.LSPYVNYSFR.V                     | 2 | 3.02 | 0.41 | -3.03 |
| IPI00333776 | Isoform 1 of Neuronal cell adhesion molecule precursor | K.NEVHLEIK.D                       | 1 | 2.25 | 0.16 | -4.23 |
| IPI00333776 | Isoform 1 of Neuronal cell adhesion molecule precursor | K.NEVHLEIK.D                       | 2 | 3.03 | 0.17 | -1.47 |
| IPI00333776 | Isoform 1 of Neuronal cell adhesion molecule precursor | K.NEVHLEIKDPTWIVK.Q                | 3 | 3.65 | 0.30 | -3.36 |
| IPI00333776 | Isoform 1 of Neuronal cell adhesion molecule precursor | K.NLNFSTR.Y                        | 2 | 2.17 | 0.14 | -2.56 |
| IPI00333776 | Isoform 1 of Neuronal cell adhesion molecule precursor | K.PLNGFESNGPGLQYK.V                | 3 | 3.53 | 0.23 | -2.06 |
| IPI00333776 | Isoform 1 of Neuronal cell adhesion molecule precursor | K.QPEYAVVQR.G                      | 1 | 2.25 | 0.34 | -3.31 |
| IPI00333776 | Isoform 1 of Neuronal cell adhesion molecule precursor | K.QPEYAVVQR.G                      | 2 | 1.99 | 0.24 | -2.06 |
| IPI00333776 | Isoform 1 of Neuronal cell adhesion molecule precursor | K.SLPSEASEQYLTK.A                  | 1 | 2.36 | 0.33 | -2.91 |
| IPI00333776 | Isoform 1 of Neuronal cell adhesion molecule precursor | K.SLPSEASEQYLTK.A                  | 2 | 4.46 | 0.39 | -6.04 |
| IPI00333776 | Isoform 1 of Neuronal cell adhesion molecule precursor | K.SLPSEASEQYLTK.A                  | 3 | 3.29 | 0.34 | -2.28 |

|             |                                                        |                                               |   |      |      |       |
|-------------|--------------------------------------------------------|-----------------------------------------------|---|------|------|-------|
| IPI00333776 | Isoform 1 of Neuronal cell adhesion molecule precursor | K.SVQLSWTPGDDNNSPITK.F                        | 2 | 5.19 | 0.57 | -4.24 |
| IPI00333776 | Isoform 1 of Neuronal cell adhesion molecule precursor | K.THGM*LPGLEPFSHYTLNVR.V                      | 2 | 4.97 | 0.56 | -5.68 |
| IPI00333776 | Isoform 1 of Neuronal cell adhesion molecule precursor | K.THGM*LPGLEPFSHYTLNVR.V                      | 3 | 4.27 | 0.47 | -3.70 |
| IPI00333776 | Isoform 1 of Neuronal cell adhesion molecule precursor | K.TLQIIHVSEADSGNYQCIK.N                       | 2 | 5.96 | 0.62 | -3.27 |
| IPI00333776 | Isoform 1 of Neuronal cell adhesion molecule precursor | K.TLQIIHVSEADSGNYQCIK.N                       | 3 | 5.97 | 0.45 | -4.53 |
| IPI00333776 | Isoform 1 of Neuronal cell adhesion molecule precursor | K.VQALNDM*GFAPEPAVVM*GHSGEDLPM*VAPGNVR.V      | 3 | 5.08 | 0.55 | -4.04 |
| IPI00333776 | Isoform 1 of Neuronal cell adhesion molecule precursor | K.VQALNDM*GFAPEPAVVM*GHSGEDLPM*VAPGNVR.V      | 4 | 3.53 | 0.27 | -4.19 |
| IPI00333776 | Isoform 1 of Neuronal cell adhesion molecule precursor | K.YIVSGTPTFVPYLIK.V                           | 1 | 3.11 | 0.41 | -1.34 |
| IPI00333776 | Isoform 1 of Neuronal cell adhesion molecule precursor | K.YIVSGTPTFVPYLIK.V                           | 2 | 5.14 | 0.51 | -5.26 |
| IPI00333776 | Isoform 1 of Neuronal cell adhesion molecule precursor | K.YIVSGTPTFVPYLIK.V                           | 3 | 3.67 | 0.26 | -3.52 |
| IPI00333776 | Isoform 1 of Neuronal cell adhesion molecule precursor | L.PSEASEQYLTK.A                               | 2 | 3.75 | 0.44 | -2.53 |
| IPI00333776 | Isoform 1 of Neuronal cell adhesion molecule precursor | L.TNGVPIEAPDDPSR.K                            | 2 | 4.14 | 0.45 | -4.34 |
| IPI00333776 | Isoform 1 of Neuronal cell adhesion molecule precursor | P.GLEPFSHYTLNVR.V                             | 2 | 3.39 | 0.30 | -2.09 |
| IPI00333776 | Isoform 1 of Neuronal cell adhesion molecule precursor | Q.PPTITQQSPKDYIIDPR.E                         | 2 | 3.53 | 0.47 | -4.33 |
| IPI00333776 | Isoform 1 of Neuronal cell adhesion molecule precursor | R.EDYICYAR.F                                  | 2 | 1.83 | 0.08 | -2.72 |
| IPI00333776 | Isoform 1 of Neuronal cell adhesion molecule precursor | R.ENIVIQCEAK.G                                | 1 | 2.94 | 0.17 | -3.05 |
| IPI00333776 | Isoform 1 of Neuronal cell adhesion molecule precursor | R.ENIVIQCEAK.G                                | 2 | 3.30 | 0.22 | -2.91 |
| IPI00333776 | Isoform 1 of Neuronal cell adhesion molecule precursor | R.ERPPTFLTPEGNASNK.E                          | 2 | 3.21 | 0.21 | -3.57 |
| IPI00333776 | Isoform 1 of Neuronal cell adhesion molecule precursor | R.ERPPTFLTPEGNASNKEELR.G                      | 2 | 4.57 | 0.36 | -5.17 |
| IPI00333776 | Isoform 1 of Neuronal cell adhesion molecule precursor | R.ERPPTFLTPEGNASNKEELR.G                      | 3 | 5.10 | 0.47 | -3.44 |
| IPI00333776 | Isoform 1 of Neuronal cell adhesion molecule precursor | R.ERPPTFLTPEGNASNKEELRGNVLSLECIAEGLPTPIYWAK.E | 4 | 4.38 | 0.32 | -4.01 |

|             |                                                        |                                   |   |      |      |       |
|-------------|--------------------------------------------------------|-----------------------------------|---|------|------|-------|
| IPI00333776 | Isoform 1 of Neuronal cell adhesion molecule precursor | R.GAAVSNNIVVRPSR.S                | 2 | 2.63 | 0.14 | -4.64 |
| IPI00333776 | Isoform 1 of Neuronal cell adhesion molecule precursor | R.GAAVSNNIVVRPSR.S                | 3 | 3.00 | 0.35 | -3.92 |
| IPI00333776 | Isoform 1 of Neuronal cell adhesion molecule precursor | R.GHLQGYR.I                       | 1 | 1.87 | 0.08 | -5.06 |
| IPI00333776 | Isoform 1 of Neuronal cell adhesion molecule precursor | R.GNVLSLECIAEGLPTPIIWAK.E         | 2 | 5.21 | 0.54 | -5.18 |
| IPI00333776 | Isoform 1 of Neuronal cell adhesion molecule precursor | R.GNVLSLECIAEGLPTPIIWAK.E         | 3 | 5.02 | 0.39 | -5.31 |
| IPI00333776 | Isoform 1 of Neuronal cell adhesion molecule precursor | R.GNVLSLECIAEGLPTPIIWAKEDGM*LPK.N | 3 | 3.52 | 0.34 | -4.35 |
| IPI00333776 | Isoform 1 of Neuronal cell adhesion molecule precursor | R.GSM*VSFECK.V                    | 1 | 2.54 | 0.21 | -3.09 |
| IPI00333776 | Isoform 1 of Neuronal cell adhesion molecule precursor | R.GSM*VSFECK.V                    | 2 | 2.97 | 0.26 | -1.60 |
| IPI00333776 | Isoform 1 of Neuronal cell adhesion molecule precursor | R.ILTPANTLYQVIANR.P               | 2 | 4.08 | 0.48 | -3.49 |
| IPI00333776 | Isoform 1 of Neuronal cell adhesion molecule precursor | R.ISWLTNGVPIEIPDDPSR.K            | 2 | 4.97 | 0.37 | -3.38 |
| IPI00333776 | Isoform 1 of Neuronal cell adhesion molecule precursor | R.ISWLTNGVPIEIPDDPSR.K            | 3 | 3.57 | 0.06 | -3.74 |
| IPI00333776 | Isoform 1 of Neuronal cell adhesion molecule precursor | R.ISWLTNGVPIEIPDDPSRK.I           | 2 | 3.68 | 0.36 | -1.53 |
| IPI00333776 | Isoform 1 of Neuronal cell adhesion molecule precursor | R.ISWLTNGVPIEIPDDPSRK.I           | 3 | 5.40 | 0.40 | -2.54 |
| IPI00333776 | Isoform 1 of Neuronal cell adhesion molecule precursor | R.KIDGDTIIFSNVQER.S               | 2 | 5.34 | 0.51 | -5.43 |
| IPI00333776 | Isoform 1 of Neuronal cell adhesion molecule precursor | R.KIDGDTIIFSNVQER.S               | 3 | 6.06 | 0.36 | -4.35 |
| IPI00333776 | Isoform 1 of Neuronal cell adhesion molecule precursor | R.TVYKNFEK.T                      | 1 | 1.90 | 0.08 | -3.71 |
| IPI00333776 | Isoform 1 of Neuronal cell adhesion molecule precursor | R.TVYKNFEK.T                      | 2 | 2.31 | 0.15 | -1.93 |
| IPI00333776 | Isoform 1 of Neuronal cell adhesion molecule precursor | R.VFNTPEGVPSAPSSLK.I              | 2 | 4.62 | 0.44 | -5.50 |
| IPI00333776 | Isoform 1 of Neuronal cell adhesion molecule precursor | R.VFNTPEGVPSAPSSLK.I              | 3 | 2.99 | 0.11 | -2.34 |
| IPI00333776 | Isoform 1 of Neuronal cell adhesion molecule precursor | R.VKAAPYWITAPQNLVSPGEDGTLICR.A    | 3 | 5.92 | 0.48 | -2.80 |
| IPI00333776 | Isoform 1 of Neuronal cell adhesion molecule precursor | R.VKAAPYWITAPQNLVSPGEDGTLICR.A    | 4 | 2.50 | 0.11 | -3.10 |

|             |                                                        |                                      |   |      |      |       |
|-------------|--------------------------------------------------------|--------------------------------------|---|------|------|-------|
| IPI00333776 | Isoform 1 of Neuronal cell adhesion molecule precursor | R.VM*AVNSIGK.S                       | 1 | 2.43 | 0.18 | -3.09 |
| IPI00333776 | Isoform 1 of Neuronal cell adhesion molecule precursor | R.VM*AVNSIGK.S                       | 2 | 2.77 | 0.20 | -2.73 |
| IPI00333776 | Isoform 1 of Neuronal cell adhesion molecule precursor | R.VSQGLNGDLYFSNVLPEDTR.E             | 2 | 5.50 | 0.51 | -3.83 |
| IPI00333776 | Isoform 1 of Neuronal cell adhesion molecule precursor | R.VSQGLNGDLYFSNVLPEDTR.E             | 3 | 4.38 | 0.24 | -2.49 |
| IPI00333776 | Isoform 1 of Neuronal cell adhesion molecule precursor | R.VSQGLNGDLYFSNVLPEDTREDYICYAR.F     | 2 | 1.61 | 0.09 | -3.71 |
| IPI00333776 | Isoform 1 of Neuronal cell adhesion molecule precursor | R.VSQGLNGDLYFSNVLPEDTREDYICYAR.F     | 3 | 4.89 | 0.46 | -6.46 |
| IPI00333776 | Isoform 1 of Neuronal cell adhesion molecule precursor | R.VSQGLNGDLYFSNVLPEDTREDYICYAR.F     | 4 | 3.87 | 0.29 | -5.93 |
| IPI00333776 | Isoform 1 of Neuronal cell adhesion molecule precursor | R.VVNGKGEGPASPDR.V                   | 2 | 3.98 | 0.47 | -4.17 |
| IPI00333776 | Isoform 1 of Neuronal cell adhesion molecule precursor | R.VVNGKGEGPASPDR.V                   | 3 | 3.11 | 0.41 | -3.22 |
| IPI00333776 | Isoform 1 of Neuronal cell adhesion molecule precursor | R.VVNGKGEGPASPDRVFNTPEGVPSAPSSLK.I   | 2 | 3.50 | 0.52 | -3.25 |
| IPI00333776 | Isoform 1 of Neuronal cell adhesion molecule precursor | R.VVNGKGEGPASPDRVFNTPEGVPSAPSSLK.I   | 3 | 4.69 | 0.46 | -4.11 |
| IPI00333776 | Isoform 1 of Neuronal cell adhesion molecule precursor | S.PYVNYSFR.V                         | 2 | 3.17 | 0.25 | -2.62 |
| IPI00333776 | Isoform 1 of Neuronal cell adhesion molecule precursor | T.PGDDNNSPITK.F                      | 2 | 3.60 | 0.43 | -2.53 |
| IPI00333776 | Isoform 1 of Neuronal cell adhesion molecule precursor | W.HHQTEVSGTQTTAQLK.L                 | 2 | 4.57 | 0.48 | -4.41 |
| IPI00333776 | Isoform 1 of Neuronal cell adhesion molecule precursor | W.HHQTEVSGTQTTAQLK.L                 | 3 | 4.01 | 0.31 | -3.60 |
| IPI00333776 | Isoform 1 of Neuronal cell adhesion molecule precursor | W.ITAPQNLVLSPGEDGTLICR.A             | 2 | 4.37 | 0.47 | -5.49 |
| IPI00333776 | Isoform 1 of Neuronal cell adhesion molecule precursor | W.ITAPQNLVLSPGEDGTLICR.A             | 3 | 4.47 | 0.40 | -4.79 |
| IPI00333776 | Isoform 1 of Neuronal cell adhesion molecule precursor | W.LTNGVPIEAPDDPSR.K                  | 2 | 4.35 | 0.48 | -3.90 |
| IPI00333776 | Isoform 1 of Neuronal cell adhesion molecule precursor | W.TPGDDNNSPITK.F                     | 2 | 3.21 | 0.43 | -0.47 |
| IPI00334238 | neuronal pentraxin receptor                            | A.ELEHGSSAYSPPDAFK.I                 | 2 | 3.38 | 0.37 | -1.76 |
| IPI00334238 | neuronal pentraxin receptor                            | A.LHGAGGSAGPPALPGAPAASAHPLPPGPLFSR.F | 3 | 6.32 | 0.57 | -2.87 |
| IPI00334238 | neuronal pentraxin receptor                            | A.LPGGADNASVASGAAASPGPQR.S           | 2 | 5.27 | 0.59 | -3.33 |
| IPI00334238 | neuronal pentraxin receptor                            | A.LPGGADNASVASGAAASPGPQR.S           | 3 | 4.54 | 0.44 | -3.36 |

|             |                             |                                                 |   |      |      |       |
|-------------|-----------------------------|-------------------------------------------------|---|------|------|-------|
| IPI00334238 | neuronal pentraxin receptor | C.IIASVPLAASPAR.A                               | 1 | 2.40 | 0.33 | -3.01 |
| IPI00334238 | neuronal pentraxin receptor | C.IIASVPLAASPAR.A                               | 2 | 3.67 | 0.53 | -3.49 |
| IPI00334238 | neuronal pentraxin receptor | C.IIASVPLAASPAR.A                               | 3 | 3.70 | 0.30 | -2.62 |
| IPI00334238 | neuronal pentraxin receptor | D.SPALILELEDAVR.A                               | 2 | 4.78 | 0.42 | -2.30 |
| IPI00334238 | neuronal pentraxin receptor | G.DAAGAAPGEREELLLLQSTAEQLR.Q                    | 2 | 4.21 | 0.44 | -4.35 |
| IPI00334238 | neuronal pentraxin receptor | G.DAAGAAPGEREELLLLQSTAEQLR.Q                    | 3 | 4.65 | 0.31 | -4.69 |
| IPI00334238 | neuronal pentraxin receptor | G.RVAELEHGSSAYSPPDAFK.I                         | 3 | 3.90 | 0.43 | -0.53 |
| IPI00334238 | neuronal pentraxin receptor | H.PIKPHGILILGQEQDTLGGR.F                        | 2 | 4.65 | 0.45 | -2.32 |
| IPI00334238 | neuronal pentraxin receptor | H.PIKPHGILILGQEQDTLGGR.F                        | 3 | 6.40 | 0.38 | -2.49 |
| IPI00334238 | neuronal pentraxin receptor | I.IIASVPLAASPAR.A                               | 2 | 3.66 | 0.46 | -2.72 |
| IPI00334238 | neuronal pentraxin receptor | K.AAFDVCK.G                                     | 1 | 1.99 | 0.17 | -2.43 |
| IPI00334238 | neuronal pentraxin receptor | K.AAFDVCK.G                                     | 2 | 1.88 | 0.08 | -3.05 |
| IPI00334238 | neuronal pentraxin receptor | K.AAFDVCKG.R                                    | 1 | 2.14 | 0.29 | -1.78 |
| IPI00334238 | neuronal pentraxin receptor | K.AAFDVCKG.R                                    | 2 | 3.06 | 0.30 | -0.67 |
| IPI00334238 | neuronal pentraxin receptor | K.ALPELYAFTACM*WLR.S                            | 2 | 5.20 | 0.53 | -4.48 |
| IPI00334238 | neuronal pentraxin receptor | K.ALPELYAFTACM*WLR.S                            | 3 | 3.23 | 0.42 | -2.83 |
| IPI00334238 | neuronal pentraxin receptor | K.ALPELYAFTACM*WLR.S                            | 2 | 4.55 | 0.49 | -5.35 |
| IPI00334238 | neuronal pentraxin receptor | K.ELDVLQGR.V                                    | 1 | 1.82 | 0.08 | -2.79 |
| IPI00334238 | neuronal pentraxin receptor | K.ELDVLQGR.V                                    | 2 | 2.40 | 0.10 | -2.82 |
| IPI00334238 | neuronal pentraxin receptor | K.LVEAFGGATK.A                                  | 2 | 3.56 | 0.31 | -3.08 |
| IPI00334238 | neuronal pentraxin receptor | K.M*DQLEGQLLAQVLALEK.E                          | 2 | 6.32 | 0.42 | -3.33 |
| IPI00334238 | neuronal pentraxin receptor | K.M*DQLEGQLLAQVLALEK.E                          | 3 | 5.12 | 0.29 | -3.19 |
| IPI00334238 | neuronal pentraxin receptor | K.M*DQLEGQLLAQVLALEKER.V                        | 2 | 3.79 | 0.45 | -1.88 |
| IPI00334238 | neuronal pentraxin receptor | K.M*DQLEGQLLAQVLALEKER.V                        | 3 | 4.38 | 0.41 | -3.37 |
| IPI00334238 | neuronal pentraxin receptor | K.MDQLEGQLLAQVLALEK.E                           | 2 | 5.38 | 0.24 |       |
| IPI00334238 | neuronal pentraxin receptor | K.MDQLEGQLLAQVLALEK.E                           | 3 | 4.32 | 0.33 |       |
| IPI00334238 | neuronal pentraxin receptor | K.MDQLEGQLLAQVLALEKER.V                         | 3 | 4.24 | 0.21 |       |
| IPI00334238 | neuronal pentraxin receptor | K.VAQLPLSLK.D                                   | 1 | 2.50 | 0.19 | -3.33 |
| IPI00334238 | neuronal pentraxin receptor | K.VAQLPLSLK.D                                   | 2 | 2.95 | 0.23 | -1.69 |
| IPI00334238 | neuronal pentraxin receptor | P.GGADNASVASGAAASPGPQR.S                        | 2 | 5.42 | 0.54 | -5.13 |
| IPI00334238 | neuronal pentraxin receptor | Q.EVEKELDVLQGR.V                                | 2 | 3.47 | 0.31 | -2.89 |
| IPI00334238 | neuronal pentraxin receptor | R.ADQDTIRELTGK.L                                | 2 | 2.86 | 0.15 | -1.48 |
| IPI00334238 | neuronal pentraxin receptor | R.ALPGGADNASVASGAAASPGPQR.S                     | 2 | 4.99 | 0.51 | -3.37 |
| IPI00334238 | neuronal pentraxin receptor | R.ALPGGADNASVASGAAASPGPQR.S                     | 3 | 2.30 | 0.16 | -3.34 |
| IPI00334238 | neuronal pentraxin receptor | R.DGLWSAYQDGELQGSGENLAAWHPIKPHGILILGQEQDTLGGR.F | 3 | 4.48 | 0.34 |       |
| IPI00334238 | neuronal pentraxin receptor | R.DGLWSAYQDGELQGSGENLAAWHPIKPHGILILGQEQDTLGGR.F | 5 | 2.94 | 0.10 | -4.42 |
| IPI00334238 | neuronal pentraxin receptor | R.FLCTPLAAACPSGAQQGDAAGAAPGEREELLLLQSTAEQLR.Q   | 3 | 5.92 | 0.53 | -4.02 |
| IPI00334238 | neuronal pentraxin receptor | R.FLCTPLAAACPSGAQQGDAAGAAPGEREELLLLQSTAEQLR.Q   | 4 | 4.98 | 0.42 | -3.50 |
| IPI00334238 | neuronal pentraxin receptor | R.IDRLEQELPAR.V                                 | 2 | 2.56 | 0.21 | -2.29 |
| IPI00334238 | neuronal pentraxin receptor | R.IRADQDTIRELTGK.L                              | 2 | 3.19 | 0.32 | -1.52 |
| IPI00334238 | neuronal pentraxin receptor | R.IRADQDTIRELTGK.L                              | 3 | 3.86 | 0.36 | -2.19 |
| IPI00334238 | neuronal pentraxin receptor | R.KALPELYAFTACM*WLR.S                           | 2 | 4.50 | 0.46 | -3.92 |

|             |                             |                                             |   |      |      |       |
|-------------|-----------------------------|---------------------------------------------|---|------|------|-------|
| IPI00334238 | neuronal pentraxin receptor | R.KALPELYAFTACM*WLR.S                       | 3 | 3.99 | 0.38 | -2.76 |
| IPI00334238 | neuronal pentraxin receptor | R.QEVEKELDVQLQGR.V                          | 2 | 3.61 | 0.30 | 0.29  |
| IPI00334238 | neuronal pentraxin receptor | R.QRQEVEKELDVQLQGR.V                        | 2 | 3.31 | 0.37 | -3.69 |
| IPI00334238 | neuronal pentraxin receptor | R.QRQEVEKELDVQLQGR.V                        | 3 | 3.51 | 0.41 | -2.81 |
| IPI00334238 | neuronal pentraxin receptor | R.QRQEVEKELDVQLQGR.V                        | 4 | 3.10 | 0.11 | -2.73 |
| IPI00334238 | neuronal pentraxin receptor | R.QTALQQEAR.I                               | 1 | 1.84 | 0.11 | -1.85 |
| IPI00334238 | neuronal pentraxin receptor | R.QTALQQEAR.I                               | 2 | 2.60 | 0.16 | -1.41 |
| IPI00334238 | neuronal pentraxin receptor | R.RDTM*ADGPWDSPALILELEDAVR.A                | 3 | 3.24 | 0.11 | -2.64 |
| IPI00334238 | neuronal pentraxin receptor | R.SLSALHGAGGSAGPPALPGAPAA.S                 | 2 | 4.35 | 0.54 | -3.03 |
| IPI00334238 | neuronal pentraxin receptor | R.SLSALHGAGGSAGPPALPGAPAAHPLPPGPLFSR.F      | 3 | 6.90 | 0.63 | -4.39 |
| IPI00334238 | neuronal pentraxin receptor | R.SLSALHGAGGSAGPPALPGAPAAHPLPPGPLFSR.F      | 4 | 3.83 | 0.31 | -3.52 |
| IPI00334238 | neuronal pentraxin receptor | R.SSGTGQGTFFSYSVPGQANEIVLLEAGHEPM*ELLINDK.V | 3 | 5.02 | 0.50 | -4.89 |
| IPI00334238 | neuronal pentraxin receptor | R.SSGTGQGTFFSYSVPGQANEIVLLEAGHEPM*ELLINDK.V | 4 | 2.66 | 0.18 | -3.97 |
| IPI00334238 | neuronal pentraxin receptor | R.SSGTGQGTFFSYSVPGQANEIVLLEAGHEPMELLINDK.V  | 3 | 4.67 | 0.31 |       |
| IPI00334238 | neuronal pentraxin receptor | R.VAELEHGSSAYSPPDAFK.I                      | 2 | 5.38 | 0.49 | -3.77 |
| IPI00334238 | neuronal pentraxin receptor | R.VAELEHGSSAYSPPDAFK.I                      | 3 | 4.57 | 0.34 | -3.40 |
| IPI00334238 | neuronal pentraxin receptor | R.VAELEHGSSAYSPPDAFKISIPR.N                 | 3 | 6.67 | 0.50 | -3.26 |
| IPI00334238 | neuronal pentraxin receptor | R.VAELEHGSSAYSPPDAFKISIPR.N                 | 4 | 5.05 | 0.41 | -2.62 |
| IPI00334238 | neuronal pentraxin receptor | V.AELEHGSSAYSPPDAFK.I                       | 2 | 4.78 | 0.53 | -2.72 |
| IPI00334238 | neuronal pentraxin receptor | W.DSPALILELEDAVR.A                          | 2 | 4.83 | 0.34 | -3.40 |
| IPI00334282 | Protein FAM3C precursor     | A.SGAANVVGPK.I                              | 1 | 2.19 | 0.32 | -2.27 |
| IPI00334282 | Protein FAM3C precursor     | D.ASLGNLFAR.S                               | 2 | 2.97 | 0.26 | -0.22 |
| IPI00334282 | Protein FAM3C precursor     | E.IKM*DASLGNLFAR.S                          | 3 | 3.98 | 0.21 | -1.32 |
| IPI00334282 | Protein FAM3C precursor     | I.KM*DASLGNLFAR.S                           | 2 | 3.14 | 0.35 | -4.99 |
| IPI00334282 | Protein FAM3C precursor     | I.KM*DASLGNLFAR.S                           | 3 | 3.66 | 0.18 | -3.36 |
| IPI00334282 | Protein FAM3C precursor     | K.AIQDGTIVLM*GTYDDGATK.L                    | 2 | 6.86 | 0.56 | -5.01 |
| IPI00334282 | Protein FAM3C precursor     | K.AIQDGTIVLM*GTYDDGATK.L                    | 3 | 5.92 | 0.48 | -4.19 |
| IPI00334282 | Protein FAM3C precursor     | K.AIQDGTIVLM*GTYDDGATKLNDEAR.R              | 2 | 5.56 | 0.54 | -8.24 |
| IPI00334282 | Protein FAM3C precursor     | K.AIQDGTIVLM*GTYDDGATKLNDEAR.R              | 3 | 5.78 | 0.53 | -4.68 |
| IPI00334282 | Protein FAM3C precursor     | K.AIQDGTIVLM*GTYDDGATKLNDEAR.R              | 4 | 4.03 | 0.46 | -3.25 |
| IPI00334282 | Protein FAM3C precursor     | K.AIQDGTIVLM*GTYDDGATKLNDEARR.L             | 3 | 4.90 | 0.41 | -6.12 |
| IPI00334282 | Protein FAM3C precursor     | K.AIQDGTIVLM*GTYDDGATKLNDEARR.L             | 4 | 3.38 | 0.38 | -3.38 |
| IPI00334282 | Protein FAM3C precursor     | K.AIQDGTIVLMGTYDDGATKLNDEAR.R               | 3 | 4.43 | 0.47 | -2.17 |
| IPI00334282 | Protein FAM3C precursor     | K.DTNKYEGWPEVEM*EGCIPQKQD.-                 | 3 | 3.08 | 0.37 | -2.98 |
| IPI00334282 | Protein FAM3C precursor     | K.ICLEDNVLM*SGVK.N                          | 1 | 1.61 | 0.16 | -3.95 |
| IPI00334282 | Protein FAM3C precursor     | K.ICLEDNVLM*SGVK.N                          | 2 | 3.72 | 0.36 | -4.27 |
| IPI00334282 | Protein FAM3C precursor     | K.M*ASGAANVVGPK.I                           | 1 | 2.90 | 0.45 | -4.92 |
| IPI00334282 | Protein FAM3C precursor     | K.M*ASGAANVVGPK.I                           | 2 | 4.24 | 0.42 | -3.44 |
| IPI00334282 | Protein FAM3C precursor     | K.M*DASLGNLFAR.S                            | 2 | 4.15 | 0.47 | -2.74 |
| IPI00334282 | Protein FAM3C precursor     | K.SPFEQHIK.N                                | 1 | 2.16 | 0.09 | -5.05 |
| IPI00334282 | Protein FAM3C precursor     | K.SPFEQHIK.N                                | 2 | 3.12 | 0.18 | -2.06 |
| IPI00334282 | Protein FAM3C precursor     | K.TGEVLDTK.Y                                | 1 | 2.54 | 0.19 | -4.32 |

|             |                                                                      |                                  |   |      |      |       |
|-------------|----------------------------------------------------------------------|----------------------------------|---|------|------|-------|
| IPI00334282 | Protein FAM3C precursor                                              | K.TGEVLDTK.Y                     | 2 | 3.04 | 0.30 | -3.83 |
| IPI00334282 | Protein FAM3C precursor                                              | K.TGEVLDTKYFDM*WGGDVAPFIEFLK.A   | 3 | 4.80 | 0.41 | -4.60 |
| IPI00334282 | Protein FAM3C precursor                                              | K.TKSPFEQHIK.N                   | 3 | 2.99 | 0.16 | -5.13 |
| IPI00334282 | Protein FAM3C precursor                                              | K.YFDM*WGGDVAPFIEFLK.A           | 2 | 5.63 | 0.53 | -5.55 |
| IPI00334282 | Protein FAM3C precursor                                              | K.YFDM*WGGDVAPFIEFLK.A           | 3 | 3.12 | 0.18 | -4.72 |
| IPI00334282 | Protein FAM3C precursor                                              | L.IADLGSTSITNLGFR.D              | 2 | 4.19 | 0.51 | -3.25 |
| IPI00334282 | Protein FAM3C precursor                                              | M.ASGAANVVGPK.I                  | 1 | 2.04 | 0.23 | -2.61 |
| IPI00334282 | Protein FAM3C precursor                                              | M.ASGAANVVGPK.I                  | 2 | 2.92 | 0.30 | 0.07  |
| IPI00334282 | Protein FAM3C precursor                                              | M.DASLGNLFAR.S                   | 2 | 3.65 | 0.22 | -2.95 |
| IPI00334282 | Protein FAM3C precursor                                              | R.DNWWFCGGK.G                    | 1 | 2.62 | 0.35 | -5.17 |
| IPI00334282 | Protein FAM3C precursor                                              | R.DNWWFCGGK.G                    | 2 | 3.06 | 0.40 | -3.46 |
| IPI00334282 | Protein FAM3C precursor                                              | R.GINVALANGK.T                   | 1 | 2.90 | 0.30 | -1.79 |
| IPI00334282 | Protein FAM3C precursor                                              | R.GINVALANGK.T                   | 2 | 3.81 | 0.43 | -2.85 |
| IPI00334282 | Protein FAM3C precursor                                              | R.LIADLGSTSITNLGFR.D             | 2 | 5.97 | 0.56 | -6.52 |
| IPI00334282 | Protein FAM3C precursor                                              | R.LIADLGSTSITNLGFR.D             | 3 | 5.52 | 0.47 | -3.84 |
| IPI00334282 | Protein FAM3C precursor                                              | R.RLIADLGSTSITNLGFR.D            | 2 | 5.39 | 0.51 | -7.05 |
| IPI00334282 | Protein FAM3C precursor                                              | R.RLIADLGSTSITNLGFR.D            | 3 | 4.20 | 0.43 | -6.92 |
| IPI00334282 | Protein FAM3C precursor                                              | R.SALDTAAR.S                     | 2 | 2.54 | 0.19 | -3.36 |
| IPI00334282 | Protein FAM3C precursor                                              | S.GAANVVGPK.I                    | 1 | 1.96 | 0.23 | -1.93 |
| IPI00334282 | Protein FAM3C precursor                                              | W.GGDVAPFIEFLK.A                 | 1 | 2.49 | 0.29 | -1.46 |
| IPI00334282 | Protein FAM3C precursor                                              | W.GGDVAPFIEFLK.A                 | 2 | 3.07 | 0.33 | -4.01 |
| IPI00334667 | Isoform 2 of Receptor-type tyrosine-protein phosphatase N2 precursor | A.LGESGEQADGPK.A                 | 2 | 2.93 | 0.30 | -2.44 |
| IPI00334667 | Isoform 2 of Receptor-type tyrosine-protein phosphatase N2 precursor | K.ATLRGDSFPDDGVQDDDRLYQEVHR.L    | 4 | 3.06 | 0.30 | -3.35 |
| IPI00334667 | Isoform 2 of Receptor-type tyrosine-protein phosphatase N2 precursor | K.DLLGQQPHSEPGA.A                | 2 | 2.97 | 0.27 | -2.97 |
| IPI00334667 | Isoform 2 of Receptor-type tyrosine-protein phosphatase N2 precursor | K.DLLGQQPHSEPGAAAFGE.L           | 2 | 3.89 | 0.49 | -3.49 |
| IPI00334667 | Isoform 2 of Receptor-type tyrosine-protein phosphatase N2 precursor | K.DLLGQQPHSEPGAAAFGELQNM*PGPSK.E | 3 | 4.23 | 0.43 | -2.51 |
| IPI00334667 | Isoform 2 of Receptor-type tyrosine-protein phosphatase N2 precursor | K.KSEHPESLSSEEETAGVENVK.S        | 2 | 6.69 | 0.68 | -3.46 |
| IPI00334667 | Isoform 2 of Receptor-type tyrosine-protein phosphatase N2 precursor | K.KSEHPESLSSEEETAGVENVK.S        | 3 | 4.15 | 0.35 | -4.02 |
| IPI00334667 | Isoform 2 of Receptor-type tyrosine-protein phosphatase N2 precursor | K.LSGTGFTWQDDYTQYVM*DQELADLPK.T  | 3 | 3.24 | 0.12 | -4.84 |
| IPI00334667 | Isoform 2 of Receptor-type tyrosine-protein phosphatase N2 precursor | K.SEHPESLSSEEETAGVENVK.S         | 2 | 6.53 | 0.66 | -3.40 |
| IPI00334667 | Isoform 2 of Receptor-type tyrosine-protein phosphatase N2 precursor | K.SEHPESLSSEEETAGVENVK.S         | 3 | 2.98 | 0.22 | -1.58 |



|             |                                                                               |                                 |   |      |      |       |
|-------------|-------------------------------------------------------------------------------|---------------------------------|---|------|------|-------|
| IPI00334667 | Isoform 2 of Receptor-type tyrosine-protein phosphatase N2 precursor          | R.AALGESGEQADGPK.A              | 2 | 4.40 | 0.56 | -2.34 |
| IPI00334667 | Isoform 2 of Receptor-type tyrosine-protein phosphatase N2 precursor          | R.GDSFPDDGVQDDDDRLYQEVHR.L      | 3 | 2.02 | 0.17 | -1.55 |
| IPI00334667 | Isoform 2 of Receptor-type tyrosine-protein phosphatase N2 precursor          | R.GYIVTDREVLGPAVTFK.V           | 3 | 3.89 | 0.17 | -2.32 |
| IPI00334667 | Isoform 2 of Receptor-type tyrosine-protein phosphatase N2 precursor          | R.HLPFLEALSQAPASDVLAR.T         | 3 | 3.27 | 0.29 | -2.91 |
| IPI00334667 | Isoform 2 of Receptor-type tyrosine-protein phosphatase N2 precursor          | R.LLPGALPFARPLDM*ER.K           | 2 | 3.16 | 0.07 |       |
| IPI00334667 | Isoform 2 of Receptor-type tyrosine-protein phosphatase N2 precursor          | R.LSATLGGLLQDHGS.R              | 2 | 3.06 | 0.34 | -4.45 |
| IPI00334667 | Isoform 2 of Receptor-type tyrosine-protein phosphatase N2 precursor          | R.LSATLGGLLQDHGSR.L             | 2 | 3.53 | 0.39 | 0.62  |
| IPI00334667 | Isoform 2 of Receptor-type tyrosine-protein phosphatase N2 precursor          | R.RPEASSPARPSK.H                | 2 | 1.92 | 0.08 | -3.50 |
| IPI00334667 | Isoform 2 of Receptor-type tyrosine-protein phosphatase N2 precursor          | R.RPEASSPARPSK.H                | 3 | 2.62 | 0.23 | -3.02 |
| IPI00334667 | Isoform 2 of Receptor-type tyrosine-protein phosphatase N2 precursor          | R.TLGQLQPDELSPK.V               | 2 | 3.88 | 0.45 | -5.95 |
| IPI00334667 | Isoform 2 of Receptor-type tyrosine-protein phosphatase N2 precursor          | R.YEVSPVALQR.L                  | 1 | 2.04 | 0.32 | -3.89 |
| IPI00334667 | Isoform 2 of Receptor-type tyrosine-protein phosphatase N2 precursor          | R.YEVSPVALQR.L                  | 2 | 2.53 | 0.31 | -1.88 |
| IPI00334667 | Isoform 2 of Receptor-type tyrosine-protein phosphatase N2 precursor          | S.EHPESLSSEEETAGVENVK.S         | 2 | 4.76 | 0.57 | -3.43 |
| IPI00335168 | Isoform Non-muscle of Myosin light polypeptide 6                              | R.ALGQNPTNAEVLK.V               | 2 | 3.27 | 0.28 | -3.09 |
| IPI00335437 | Ankyrin repeat and zinc finger domain-containing protein 1                    | R.DLLAGPSWAKALEEAGTILLRAPRSGR.S | 3 | 2.97 | 0.10 |       |
| IPI00335541 | Isoform 1 of Protein timeless homolog                                         | R.GNRHSRFGGSYIVQGLK.S           | 3 | 2.88 | 0.16 |       |
| IPI00335589 | RNA methyltransferase-like protein 1                                          | K.ELPVDKLGVS LIKVK.F            | 2 | 2.41 | 0.15 |       |
| IPI00335946 | Family with sequence similarity 120B                                          | R.VKENFDK.A                     | 1 | 2.41 | 0.08 | -2.55 |
| IPI00337351 | MAM domain-containing glycosylphosphatidylinositol anchor protein 2 precursor | K.AENGLGSPAIIK.S                | 2 | 2.22 | 0.12 | -1.30 |
| IPI00337351 | MAM domain-containing glycosylphosphatidylinositol anchor protein 2 precursor | R.ADKEVAM*PDGSM*QM*ESYDGLR.I    | 3 | 4.77 | 0.46 | -7.56 |
| IPI00337351 | MAM domain-containing glycosylphosphatidylinositol anchor protein 2 precursor | R.CSFLVTGK.A                    | 2 | 2.27 | 0.24 | -1.67 |

|             |                                                                               |                                        |   |      |      |       |
|-------------|-------------------------------------------------------------------------------|----------------------------------------|---|------|------|-------|
| IPI00337351 | MAM domain-containing glycosylphosphatidylinositol anchor protein 2 precursor | R.GQEVLLQGSDKGVEIYEPFFTQGETK.I         | 3 | 4.74 | 0.28 | -4.53 |
| IPI00337351 | MAM domain-containing glycosylphosphatidylinositol anchor protein 2 precursor | R.TGQFDSQEYTEYAVK.S                    | 2 | 4.27 | 0.52 | -2.60 |
| IPI00337351 | MAM domain-containing glycosylphosphatidylinositol anchor protein 2 precursor | R.VLTYEWR.L                            | 2 | 2.13 | 0.12 | -2.07 |
| IPI00337385 | Isoform 1 of Pre-mRNA-processing factor 40 homolog A                          | K.TGKDSGNWDTSGSELSEGELEKRRR.T          | 3 | 2.33 | 0.07 | -2.52 |
| IPI00337548 | Cell growth regulator with EF hand domain protein 1                           | K.DGVTRPDSEVQHQLLPNPFQPGQEQLGLLQSYLK.G | 3 | 6.32 | 0.45 |       |
| IPI00337548 | Cell growth regulator with EF hand domain protein 1                           | K.DGVTRPDSEVQHQLLPNPFQPGQEQLGLLQSYLK.G | 4 | 3.01 | 0.14 | -2.18 |
| IPI00337548 | Cell growth regulator with EF hand domain protein 1                           | K.NTQNDFEVHIVQVENDEI.-                 | 2 | 4.66 | 0.30 |       |
| IPI00337548 | Cell growth regulator with EF hand domain protein 1                           | K.SPLRQETQEAPGPR.E                     | 2 | 3.49 | 0.27 | -4.08 |
| IPI00337548 | Cell growth regulator with EF hand domain protein 1                           | K.SPLRQETQEAPGPR.E                     | 3 | 3.81 | 0.35 | -2.33 |
| IPI00337548 | Cell growth regulator with EF hand domain protein 1                           | K.SPLRQETQEAPGPREEAK.G                 | 2 | 2.81 | 0.25 | -1.59 |
| IPI00337548 | Cell growth regulator with EF hand domain protein 1                           | K.SPLRQETQEAPGPREEAK.G                 | 3 | 2.93 | 0.08 | -0.45 |
| IPI00337548 | Cell growth regulator with EF hand domain protein 1                           | K.SPLRQETQEAPGPREEAK.G                 | 4 | 3.63 | 0.20 | -0.76 |
| IPI00337548 | Cell growth regulator with EF hand domain protein 1                           | K.VLETQDLNGDGLM*TPAELINFPGVALR.H       | 3 | 5.66 | 0.49 |       |
| IPI00337548 | Cell growth regulator with EF hand domain protein 1                           | L.RHVEPGEPLAPSPQEPQAVGR.Q              | 3 | 4.21 | 0.37 | -5.45 |
| IPI00337548 | Cell growth regulator with EF hand domain protein 1                           | R.ENGEAAKELPGETLESK.N                  | 2 | 4.37 | 0.48 | -2.49 |
| IPI00337548 | Cell growth regulator with EF hand domain protein 1                           | R.ENGEAAKELPGETLESK.N                  | 3 | 3.70 | 0.33 | -1.07 |
| IPI00337548 | Cell growth regulator with EF hand domain protein 1                           | R.ESLDPVQEPGGQAEADGDVPGPR.G            | 2 | 5.68 | 0.52 | -3.63 |
| IPI00337548 | Cell growth regulator with EF hand domain protein 1                           | R.ESLDPVQEPGGQAEADGDVPGPR.G            | 3 | 2.97 | 0.40 | -2.85 |
| IPI00337548 | Cell growth regulator with EF hand domain protein 1                           | R.GEAEGQAEAKGDAPGPR.G                  | 3 | 3.73 | 0.39 | -1.77 |

|             |                                                               |                                     |   |      |      |       |
|-------------|---------------------------------------------------------------|-------------------------------------|---|------|------|-------|
| IPI00337548 | Cell growth regulator with EF hand domain protein 1           | R.HVEPGEPLAPSPQEPQAVGR.Q            | 2 | 4.97 | 0.58 | -2.15 |
| IPI00337548 | Cell growth regulator with EF hand domain protein 1           | R.HVEPGEPLAPSPQEPQAVGR.Q            | 3 | 2.86 | 0.16 | -2.77 |
| IPI00337548 | Cell growth regulator with EF hand domain protein 1           | R.RESLDPVQEPGGQAEADGDVPGPR.G        | 3 | 5.29 | 0.49 | -3.64 |
| IPI00337612 | Discoidin, CUB and LCCL domain-containing protein 1 precursor | R.GFLLTYASSDHPDLITCLER.A            | 3 | 3.82 | 0.38 | -1.21 |
| IPI00337612 | Discoidin, CUB and LCCL domain-containing protein 1 precursor | R.TTGSTQSNFNFYVK.S                  | 2 | 3.89 | 0.46 | -2.90 |
| IPI00373823 | Cytochrome P450 26C1                                          | K.GSMGWPFPGETLHWLVQGSR.F            | 2 | 2.43 | 0.07 | -3.24 |
| IPI00373872 | polycystin 1-like 2 isoform a                                 | R.EALQLMVSSSEFIDNVTISLWLLSPYIGNLS.C | 3 | 3.82 | 0.19 | 2.99  |
| IPI00374039 | Conserved hypothetical protein                                | R.MQDTM*VQELALAKK.Q                 | 2 | 2.77 | 0.07 |       |
| IPI00374065 | similar to melanoma inhibitory activity 3 isoform 1           | K.FGSTADALVSDDETTR.L                | 2 | 4.03 | 0.48 | -3.28 |
| IPI00374065 | similar to melanoma inhibitory activity 3 isoform 1           | K.SAYDDTENDLKGAAIHISK.G             | 3 | 2.53 | 0.24 | -2.94 |
| IPI00374065 | similar to melanoma inhibitory activity 3 isoform 1           | K.TLQDM*EKNPELSK.E                  | 2 | 2.97 | 0.26 | 0.36  |
| IPI00374065 | similar to melanoma inhibitory activity 3 isoform 1           | R.FSSPDEIDLPRELEDEVPIGR.N           | 3 | 3.69 | 0.40 | -3.71 |
| IPI00374065 | similar to melanoma inhibitory activity 3 isoform 1           | R.QFDVNLQVPDR.A                     | 2 | 2.04 | 0.17 | -2.95 |
| IPI00374065 | similar to melanoma inhibitory activity 3 isoform 1           | R.SDFSSEIK.I                        | 2 | 2.38 | 0.11 | -2.95 |
| IPI00374129 | NLR family, pyrin domain containing 3 isoform b               | K.YVRSRFQCIEDRNAR.L                 | 2 | 1.37 | 0.07 | -4.06 |
| IPI00374301 | hypothetical protein                                          | R.SLSSPNCFGPQPGGPEMR.R              | 2 | 2.00 | 0.06 | -5.34 |
| IPI00374563 | Agrin precursor                                               | K.ALQSNHFELSLR.T                    | 2 | 3.47 | 0.39 | -3.50 |
| IPI00374563 | Agrin precursor                                               | K.ALQSNHFELSLR.T                    | 3 | 2.61 | 0.23 | -3.73 |
| IPI00374563 | Agrin precursor                                               | K.AYGTGFVGCRLR.D                    | 1 | 1.69 | 0.30 | -2.77 |
| IPI00374563 | Agrin precursor                                               | K.AYGTGFVGCRLR.D                    | 2 | 3.27 | 0.31 | -2.86 |
| IPI00374563 | Agrin precursor                                               | K.SAGDVDTLAFDGR.T                   | 1 | 2.66 | 0.44 | -1.72 |
| IPI00374563 | Agrin precursor                                               | K.SAGDVDTLAFDGR.T                   | 2 | 4.36 | 0.55 | -3.87 |
| IPI00374563 | Agrin precursor                                               | K.SELFGETAR.S                       | 1 | 1.79 | 0.11 | -3.48 |
| IPI00374563 | Agrin precursor                                               | K.SELFGETAR.S                       | 2 | 2.70 | 0.20 | -2.18 |
| IPI00374563 | Agrin precursor                                               | K.VLGAPVPAFEGR.S                    | 2 | 2.57 | 0.23 | -2.30 |
| IPI00374563 | Agrin precursor                                               | R.AIVDVHFDPTTAFR.A                  | 2 | 3.46 | 0.40 | -3.17 |
| IPI00374563 | Agrin precursor                                               | R.ALEPQGLLLYNGNAR.G                 | 2 | 2.48 | 0.38 | -3.91 |
| IPI00374563 | Agrin precursor                                               | R.DVVVGR.H                          | 1 | 2.12 | 0.11 | -3.17 |
| IPI00374563 | Agrin precursor                                               | R.EAACLQQTQIEEAR.A                  | 2 | 3.86 | 0.31 | -2.83 |
| IPI00374563 | Agrin precursor                                               | R.FGALCEAETGR.C                     | 2 | 2.75 | 0.29 | -2.54 |
| IPI00374563 | Agrin precursor                                               | R.GKDFLALALLDGR.V                   | 3 | 3.17 | 0.28 | -2.11 |
| IPI00374563 | Agrin precursor                                               | R.GM*LCGFGAVCEPNAEGPGR.A            | 2 | 5.62 | 0.57 | -2.78 |
| IPI00374563 | Agrin precursor                                               | R.GPSGLLLYNGQK.T                    | 2 | 3.78 | 0.41 | -1.35 |
| IPI00374563 | Agrin precursor                                               | R.LELGIGGAATR.G                     | 2 | 1.79 | 0.08 | -2.51 |
| IPI00374563 | Agrin precursor                                               | R.LLDVNNQR.L                        | 2 | 2.42 | 0.11 | -2.07 |
| IPI00374563 | Agrin precursor                                               | R.RPLQEHVR.F                        | 2 | 2.88 | 0.18 | -3.10 |
| IPI00374563 | Agrin precursor                                               | R.SFLAFPTLR.A                       | 2 | 2.76 | 0.28 | -0.74 |

|             |                                                                     |                                             |   |      |      |       |
|-------------|---------------------------------------------------------------------|---------------------------------------------|---|------|------|-------|
| IPI00374563 | Agirin precursor                                                    | R.SIESTLDDLFR.N                             | 2 | 3.97 | 0.39 | -2.88 |
| IPI00374563 | Agirin precursor                                                    | R.STVPVNTNR.W                               | 2 | 2.31 | 0.19 | 0.20  |
| IPI00374563 | Agirin precursor                                                    | R.TFVEYLNAVTESEK.A                          | 2 | 5.38 | 0.52 | -4.64 |
| IPI00374563 | Agirin precursor                                                    | R.VLGESPVPHTVLNLKEPLYVGGAPDFSK.L            | 3 | 4.83 | 0.55 | -1.91 |
| IPI00374563 | Agirin precursor                                                    | R.VLGESPVPHTVLNLKEPLYVGGAPDFSK.L            | 4 | 3.47 | 0.30 | -2.77 |
| IPI00374563 | Agirin precursor                                                    | W.LGGLPELPVGPALPK.A                         | 2 | 2.95 | 0.25 | -1.65 |
| IPI00374590 | cancer susceptibility candidate 4 isoform a                         | K.IQSNDGKELDINNQVVPK.N                      | 3 | 2.38 | 0.10 | -2.97 |
| IPI00374590 | cancer susceptibility candidate 4 isoform a                         | K.VAENVADKNEEPSSNHIPHGK.E                   | 3 | 3.95 | 0.34 | -3.40 |
| IPI00374590 | cancer susceptibility candidate 4 isoform a                         | R.FFDENESPVDPQHGSK.L                        | 2 | 4.86 | 0.56 | -3.13 |
| IPI00374590 | cancer susceptibility candidate 4 isoform a                         | R.FFDENESPVDPQHGSK.L                        | 3 | 3.12 | 0.35 | -1.97 |
| IPI00374670 | hypothetical protein isoform 2                                      | R.DGVSLGAVSSTEEASRCR.R                      | 2 | 2.12 | 0.06 | -0.37 |
| IPI00374732 | similar to peptidylprolyl isomerase A isoform 1                     | K.GSRFHRIIPGFM*CQGGDFTR.H                   | 2 | 2.33 | 0.15 | 0.45  |
| IPI00374732 | similar to peptidylprolyl isomerase A isoform 1                     | K.HTGPGILSM*ANAGPNTNGSQFFICTAK.S            | 3 | 5.75 | 0.44 | -3.52 |
| IPI00374732 | similar to peptidylprolyl isomerase A isoform 1                     | K.KITIADCGQLE.-                             | 2 | 2.86 | 0.28 | -3.75 |
| IPI00374862 | Isoform 1 of Kelch-like protein 5                                   | K.QLHPSNCLGIRSFADAQGCTDLHKVAHNYTMEHFMEVIR.N | 3 | 1.36 | 0.16 | 2.58  |
| IPI00374914 | hypothetical protein                                                | K.TACSLDAR.E                                | 2 | 2.65 | 0.21 | -3.13 |
| IPI00374914 | hypothetical protein                                                | R.ALCACWPAGH.-                              | 1 | 1.82 | 0.30 | -2.39 |
| IPI00374914 | hypothetical protein                                                | R.ALCACWPAGH.-                              | 2 | 3.25 | 0.46 | -2.56 |
| IPI00374914 | hypothetical protein                                                | R.TETLLLQAER.R                              | 1 | 2.27 | 0.22 | -3.23 |
| IPI00374914 | hypothetical protein                                                | R.TETLLLQAER.R                              | 2 | 3.13 | 0.28 | -3.77 |
| IPI00375174 | Ankyrin repeat and sterile alpha motif domain-containing protein 1B | K.DYSFEDLCHTISDHYLDNLSK.I                   | 2 | 1.59 | 0.11 | -3.43 |
| IPI00375205 | Isoform 1 of Polypeptide N-acetylgalactosaminyltransferase 10       | K.IAWDLPK.F                                 | 2 | 2.30 | 0.10 | -2.15 |
| IPI00375205 | Isoform 1 of Polypeptide N-acetylgalactosaminyltransferase 10       | K.RIPIPELQK.A                               | 2 | 2.66 | 0.18 | -2.39 |
| IPI00375205 | Isoform 1 of Polypeptide N-acetylgalactosaminyltransferase 10       | K.TFFLGDGQK.L                               | 1 | 2.07 | 0.21 | -3.22 |
| IPI00375205 | Isoform 1 of Polypeptide N-acetylgalactosaminyltransferase 10       | K.TFFLGDGQK.L                               | 2 | 2.27 | 0.09 | -2.79 |
| IPI00375205 | Isoform 1 of Polypeptide N-acetylgalactosaminyltransferase 10       | K.TIVCPM*IDVIDHDDFR.Y                       | 2 | 3.43 | 0.43 | -3.37 |
| IPI00375205 | Isoform 1 of Polypeptide N-acetylgalactosaminyltransferase 10       | K.TIVCPM*IDVIDHDDFR.Y                       | 3 | 1.72 | 0.11 | -2.52 |
| IPI00375205 | Isoform 1 of Polypeptide N-acetylgalactosaminyltransferase 10       | R.ERQPDGTPGGSGAAVAPAAGQGSHSR.Q              | 3 | 4.37 | 0.30 | -5.28 |
| IPI00375205 | Isoform 1 of Polypeptide N-acetylgalactosaminyltransferase 10       | R.M*LGASVATGDVITFLDSHCEANVNWLPPLDR.I        | 3 | 3.04 | 0.22 | -2.98 |
| IPI00375205 | Isoform 1 of Polypeptide N-acetylgalactosaminyltransferase 10       | R.VGNGEQGRPYPM*TDAER.V                      | 3 | 2.90 | 0.18 | -2.88 |
| IPI00375205 | Isoform 1 of Polypeptide N-acetylgalactosaminyltransferase 10       | R.YETQAGDAM*R.G                             | 2 | 3.28 | 0.34 | -2.09 |

|             |                                              |                                        |   |      |      |       |
|-------------|----------------------------------------------|----------------------------------------|---|------|------|-------|
| IPI00375364 | Isoform 3 of Chitotriosidase-1 precursor     | K.LILGM*PTYGR.S                        | 2 | 2.58 | 0.20 | -2.80 |
| IPI00375364 | Isoform 3 of Chitotriosidase-1 precursor     | K.VTGHNSPLYK.R                         | 2 | 2.41 | 0.18 | -3.22 |
| IPI00375364 | Isoform 3 of Chitotriosidase-1 precursor     | R.FTTLVQDLANAFQQEAQTSGK.E              | 2 | 6.00 | 0.52 | -2.93 |
| IPI00375364 | Isoform 3 of Chitotriosidase-1 precursor     | R.FTTLVQDLANAFQQEAQTSGK.E              | 3 | 5.13 | 0.34 | -3.81 |
| IPI00375364 | Isoform 3 of Chitotriosidase-1 precursor     | R.FTTLVQDLANAFQQEAQTSGKER.L            | 3 | 3.68 | 0.38 | -3.68 |
| IPI00375364 | Isoform 3 of Chitotriosidase-1 precursor     | R.VGAPATGSGTGPFTK.E                    | 2 | 4.13 | 0.52 | -3.52 |
| IPI00375547 | Protein tyrosine phosphatase receptor type D | K.GPGPYSPSVQFR.T                       | 2 | 3.15 | 0.32 | -1.00 |
| IPI00375547 | Protein tyrosine phosphatase receptor type D | K.GYYIIIVPLKK.S                        | 2 | 3.43 | 0.43 | -4.48 |
| IPI00375547 | Protein tyrosine phosphatase receptor type D | K.GYYIIIVPLKK.S                        | 3 | 2.87 | 0.30 | -3.75 |
| IPI00375547 | Protein tyrosine phosphatase receptor type D | K.HNVADSQITTIGNLVPQK.T                 | 2 | 3.88 | 0.50 | -3.32 |
| IPI00375547 | Protein tyrosine phosphatase receptor type D | K.HNVADSQITTIGNLVPQKTSVK.V             | 3 | 6.15 | 0.49 | -1.87 |
| IPI00375547 | Protein tyrosine phosphatase receptor type D | K.ILYDDGKM*VEEVDGR.A                   | 3 | 3.65 | 0.34 | -2.62 |
| IPI00375547 | Protein tyrosine phosphatase receptor type D | K.KVSNQRFEVIEFDDGSGSVLR.I              | 3 | 4.66 | 0.47 | -1.18 |
| IPI00375547 | Protein tyrosine phosphatase receptor type D | K.LIVNLKPEK.S                          | 2 | 2.45 | 0.18 | -2.57 |
| IPI00375547 | Protein tyrosine phosphatase receptor type D | K.LVSTTGAVPGKPR.L                      | 2 | 3.18 | 0.41 | -2.61 |
| IPI00375547 | Protein tyrosine phosphatase receptor type D | K.M*VEEVDGR.A                          | 2 | 2.33 | 0.13 | -1.84 |
| IPI00375547 | Protein tyrosine phosphatase receptor type D | K.NSEELYKEIDGVATTR.Y                   | 3 | 3.38 | 0.38 | -2.06 |
| IPI00375547 | Protein tyrosine phosphatase receptor type D | K.SYSFVLNTR.G                          | 1 | 1.61 | 0.12 | -2.28 |
| IPI00375547 | Protein tyrosine phosphatase receptor type D | K.SYSFVLNTR.G                          | 2 | 3.47 | 0.26 | -1.82 |
| IPI00375547 | Protein tyrosine phosphatase receptor type D | K.TNLDGM*ITVQLPEVPANENIK.G             | 2 | 4.72 | 0.49 | -5.07 |
| IPI00375547 | Protein tyrosine phosphatase receptor type D | K.VSNQRFEVIEFDDGSGSVLR.I               | 3 | 4.46 | 0.34 | -3.71 |
| IPI00375547 | Protein tyrosine phosphatase receptor type D | K.WM*LGAEDLTPEDDM*PIGR.N               | 2 | 3.53 | 0.42 | -2.68 |
| IPI00375547 | Protein tyrosine phosphatase receptor type D | K.YTAVDGEDDKPHEILGIPSDTTK.Y            | 3 | 3.65 | 0.20 | -0.96 |
| IPI00375547 | Protein tyrosine phosphatase receptor type D | P.VLTQTSEQAPSSAPR.D                    | 2 | 4.27 | 0.35 | -2.52 |
| IPI00375547 | Protein tyrosine phosphatase receptor type D | R.EVELKPYIAAHFDVLPTEFTLGDDKHYGGFTNK.Q  | 3 | 4.11 | 0.32 | -5.08 |
| IPI00375547 | Protein tyrosine phosphatase receptor type D | R.EVELKPYIAAHFDVLPTEFTLGDDKHYGGFTNK.Q  | 4 | 4.71 | 0.48 | -3.02 |
| IPI00375547 | Protein tyrosine phosphatase receptor type D | R.EVELKPYIAAHFDVLPTEFTLGDDKHYGGFTNK.Q  | 5 | 3.66 | 0.24 | -3.70 |
| IPI00375547 | Protein tyrosine phosphatase receptor type D | R.GALQIEQSEESDQGGKYECVATNSAGTR.Y       | 3 | 6.59 | 0.59 | -2.64 |
| IPI00375547 | Protein tyrosine phosphatase receptor type D | R.GFPTIDM*GPQLK.V                      | 2 | 2.74 | 0.26 | -3.67 |
| IPI00375547 | Protein tyrosine phosphatase receptor type D | R.GPPSEPVLTQTSEQAPSSAPR.D              | 2 | 4.98 | 0.60 | -2.90 |
| IPI00375547 | Protein tyrosine phosphatase receptor type D | R.GYQVHYVR.M                           | 2 | 2.74 | 0.30 | -3.75 |
| IPI00375547 | Protein tyrosine phosphatase receptor type D | R.ITIEPGTSYR.L                         | 2 | 2.44 | 0.24 | -1.91 |
| IPI00375547 | Protein tyrosine phosphatase receptor type D | R.LQGLKPNLSLYFR.L                      | 2 | 2.32 | 0.24 | -3.75 |
| IPI00375547 | Protein tyrosine phosphatase receptor type D | R.LTVLREDQIPR.G                        | 3 | 2.42 | 0.26 | -3.08 |
| IPI00375547 | Protein tyrosine phosphatase receptor type D | R.NVLELNDVR.Q                          | 1 | 2.93 | 0.22 | -2.75 |
| IPI00375547 | Protein tyrosine phosphatase receptor type D | R.NVLELNDVR.Q                          | 2 | 3.13 | 0.26 | -2.16 |
| IPI00375547 | Protein tyrosine phosphatase receptor type D | R.SESIGGTPIR.G                         | 2 | 2.66 | 0.15 | -1.49 |
| IPI00375547 | Protein tyrosine phosphatase receptor type D | R.SPQGLGASTAEISAR.T                    | 2 | 4.61 | 0.47 | -3.72 |
| IPI00375547 | Protein tyrosine phosphatase receptor type D | R.TATM*LCAASGNPDPEITWFKDFLPVDTSNNNGR.I | 3 | 5.81 | 0.53 | -1.15 |
| IPI00375547 | Protein tyrosine phosphatase receptor type D | R.TATM*LCAASGNPDPEITWFKDFLPVDTSNNNGR.I | 4 | 3.94 | 0.38 | -2.09 |
| IPI00375547 | Protein tyrosine phosphatase receptor type D | R.TNEDVPSGPPR.K                        | 2 | 3.03 | 0.37 | -2.60 |
| IPI00375547 | Protein tyrosine phosphatase receptor type D | R.TPVDQTVSGGVASFCQATGDPRPK.I           | 2 | 3.76 | 0.54 | -1.52 |

|             |                                              |                                          |   |      |      |       |
|-------------|----------------------------------------------|------------------------------------------|---|------|------|-------|
| IPI00375547 | Protein tyrosine phosphatase receptor type D | R.TPVDQGTGVSGGVASFICQATGDPRPK.I          | 3 | 3.93 | 0.48 | -2.52 |
| IPI00375547 | Protein tyrosine phosphatase receptor type D | R.TPVDQGTGVSGGVASFICQATGDPRPK.I          | 4 | 2.50 | 0.15 | -1.89 |
| IPI00375547 | Protein tyrosine phosphatase receptor type D | R.VVAVNNIGR.G                            | 2 | 3.13 | 0.25 | -2.06 |
| IPI00375547 | Protein tyrosine phosphatase receptor type D | R.VVAVNNIGRGPPEPVLQTSEQAPSSAPR.D         | 3 | 5.98 | 0.60 | -2.36 |
| IPI00375547 | Protein tyrosine phosphatase receptor type D | R.YSAPANLYVR.E                           | 1 | 1.79 | 0.17 | -2.65 |
| IPI00375547 | Protein tyrosine phosphatase receptor type D | R.YSAPANLYVR.E                           | 2 | 2.87 | 0.33 | -2.22 |
| IPI00375547 | Protein tyrosine phosphatase receptor type D | R.YSVAGLSPYSDYEFR.V                      | 2 | 3.48 | 0.46 | -2.49 |
| IPI00375746 | Isoform 1 of Guanylate-binding protein 6     | R.KCFVFDPRPTNDKDLLANIEKVSEK.Q            | 3 | 3.40 | 0.14 | -4.81 |
| IPI00375803 | Isoform 1 of GON-4-like protein              | R.DPLREQKDLAFAQAYLTR.V                   | 3 | 2.45 | 0.16 |       |
| IPI00375879 | Uncharacterized protein KIAA1467             | K.ETPATSAVTSDQK.S                        | 2 | 3.99 | 0.44 | -4.97 |
| IPI00375879 | Uncharacterized protein KIAA1467             | R.IKFVEAPYEI.-                           | 2 | 3.22 | 0.23 | -2.18 |
| IPI00375879 | Uncharacterized protein KIAA1467             | R.TGNPVGPRVK.Y                           | 2 | 2.41 | 0.20 | -2.66 |
| IPI00375881 | Polycystic kidney disease 1-like protein 3   | K.WRFFTGKRNILDTSIILISFILLGLDM*K.S        | 3 | 2.96 | 0.23 |       |
| IPI00376087 | putative binding protein 7a5                 | K.VISKEQVM*FMSDSVFTTR.N                  | 2 | 2.81 | 0.09 |       |
| IPI00376131 | Similar to Leucine rich repeat neuronal 6C   | R.CLNPGDLAALPALEELDLSENAIAHVEPGAFANLPR.L | 3 | 3.97 | 0.33 | -3.43 |
| IPI00376131 | Similar to Leucine rich repeat neuronal 6C   | R.CLNPGDLAALPALEELDLSENAIAHVEPGAFANLPR.L | 4 | 3.72 | 0.25 | -3.88 |
| IPI00376131 | Similar to Leucine rich repeat neuronal 6C   | R.LTAVPDGIPAETR.L                        | 2 | 2.80 | 0.28 | -2.87 |
| IPI00376131 | Similar to Leucine rich repeat neuronal 6C   | R.RAFAGLLALEELTLER.C                     | 3 | 2.96 | 0.14 | -3.76 |
| IPI00376237 | Isoform 2 of Transcription factor LBX2       | K.TASRAENNSQACRPQR.R                     | 2 | 2.22 | 0.06 | -3.26 |
| IPI00376383 | Centrosomal protein 110kDa                   | K.EELEKVRTLTQLEQSALQAELEKER.Q            | 3 | 2.44 | 0.17 | -7.77 |
| IPI00376394 | Sulfhydryl oxidase 2 precursor               | K.LFHHTLVEASTHPDALVGTGFEDDPQAVLQTM*R.R   | 4 | 3.94 | 0.35 | -1.28 |
| IPI00376394 | Sulfhydryl oxidase 2 precursor               | K.TPDQAILWLWK.K                          | 2 | 3.91 | 0.45 | -3.37 |
| IPI00376394 | Sulfhydryl oxidase 2 precursor               | R.AFFSSYLK.S                             | 2 | 2.12 | 0.17 | -1.47 |
| IPI00376394 | Sulfhydryl oxidase 2 precursor               | R.ALDGDKAFLEK.L                          | 2 | 2.94 | 0.30 | -2.13 |
| IPI00376394 | Sulfhydryl oxidase 2 precursor               | R.DNLLDTYSADQGDSSSEGGTLAR.G              | 2 | 6.07 | 0.57 | -1.61 |
| IPI00376394 | Sulfhydryl oxidase 2 precursor               | R.DNLLDTYSADQGDSSSEGGTLAR.G              | 3 | 4.89 | 0.39 | -1.26 |
| IPI00376394 | Sulfhydryl oxidase 2 precursor               | R.EVILDLIPYESIVVTR.A                     | 2 | 5.12 | 0.46 | -4.83 |
| IPI00376394 | Sulfhydryl oxidase 2 precursor               | R.EVILDLIPYESIVVTR.A                     | 3 | 3.40 | 0.30 | -4.88 |
| IPI00376394 | Sulfhydryl oxidase 2 precursor               | R.ISGFILTNHIK.W                          | 2 | 2.66 | 0.15 | -3.16 |
| IPI00376394 | Sulfhydryl oxidase 2 precursor               | R.ISGFILTNHIK.W                          | 3 | 2.92 | 0.26 | -3.70 |
| IPI00376394 | Sulfhydryl oxidase 2 precursor               | R.LAGHLSSEDPFRPK.L                       | 2 | 2.76 | 0.15 | -2.72 |
| IPI00376394 | Sulfhydryl oxidase 2 precursor               | R.LDPIQPSDVLSSLNDNR.G                    | 2 | 4.05 | 0.47 | -4.32 |
| IPI00376394 | Sulfhydryl oxidase 2 precursor               | R.LDPIQPSDVLSSLNDNR.G                    | 3 | 4.68 | 0.35 | -3.81 |
| IPI00376427 | Neural cell adhesion molecule 2 precursor    | K.AGEDEKQAFQVQVQPH.I                     | 2 | 3.77 | 0.41 | -2.67 |
| IPI00376427 | Neural cell adhesion molecule 2 precursor    | K.AGEDEKQAFQVQVQPH.I                     | 3 | 4.86 | 0.41 | -2.19 |
| IPI00376427 | Neural cell adhesion molecule 2 precursor    | K.AGEDEKQAFQVQVQPHIQLK.N                 | 4 | 4.52 | 0.38 | -1.64 |
| IPI00376427 | Neural cell adhesion molecule 2 precursor    | K.GQGDYSKIEIFQTLVPRESPSPSIHQPSGK.S       | 4 | 5.42 | 0.43 | -6.10 |
| IPI00376427 | Neural cell adhesion molecule 2 precursor    | K.GQHGSSSLHIK.D                          | 2 | 3.30 | 0.33 | -2.96 |
| IPI00376427 | Neural cell adhesion molecule 2 precursor    | K.GQHGSSSLHIKDVK.L                       | 2 | 4.04 | 0.42 | -4.30 |
| IPI00376427 | Neural cell adhesion molecule 2 precursor    | K.GQTQEATVVLEIYQK.L                      | 2 | 3.47 | 0.31 | -5.76 |
| IPI00376427 | Neural cell adhesion molecule 2 precursor    | K.GSNTELTVR.N                            | 1 | 1.94 | 0.17 | -1.76 |
| IPI00376427 | Neural cell adhesion molecule 2 precursor    | K.GSNTELTVR.N                            | 2 | 2.73 | 0.17 | -1.44 |

|             |                                           |                              |   |      |      |       |
|-------------|-------------------------------------------|------------------------------|---|------|------|-------|
| IPI00376427 | Neural cell adhesion molecule 2 precursor | K.IEIFQTLPVREPSPPSIHQPSGGK.S | 2 | 4.03 | 0.46 | -2.67 |
| IPI00376427 | Neural cell adhesion molecule 2 precursor | K.IEIFQTLPVREPSPPSIHQPSGGK.S | 3 | 5.37 | 0.54 | -3.49 |
| IPI00376427 | Neural cell adhesion molecule 2 precursor | K.IEIFQTLPVREPSPPSIHQPSGGK.S | 4 | 3.52 | 0.35 | -2.95 |
| IPI00376427 | Neural cell adhesion molecule 2 precursor | K.IIELSQTTAK.V               | 1 | 2.24 | 0.20 | -3.97 |
| IPI00376427 | Neural cell adhesion molecule 2 precursor | K.IIELSQTTAK.V               | 2 | 3.41 | 0.24 | -2.54 |
| IPI00376427 | Neural cell adhesion molecule 2 precursor | K.LIEENEKYILK.G              | 2 | 3.98 | 0.23 | -3.44 |
| IPI00376427 | Neural cell adhesion molecule 2 precursor | K.LSITKQDDGGAPILEYIVK.Y      | 2 | 2.80 | 0.17 | -1.68 |
| IPI00376427 | Neural cell adhesion molecule 2 precursor | K.LSITKQDDGGAPILEYIVK.Y      | 3 | 4.06 | 0.34 | -2.88 |
| IPI00376427 | Neural cell adhesion molecule 2 precursor | K.LTFREVVSPEFK.Q             | 2 | 2.97 | 0.22 | -2.76 |
| IPI00376427 | Neural cell adhesion molecule 2 precursor | K.LTFREVVSPEFK.Q             | 3 | 4.20 | 0.29 | -2.57 |
| IPI00376427 | Neural cell adhesion molecule 2 precursor | K.M*ILEIAPTSNDNDFGR.Y        | 2 | 3.91 | 0.35 | -4.86 |
| IPI00376427 | Neural cell adhesion molecule 2 precursor | K.QAFLQVQPH.I                | 2 | 2.99 | 0.38 | -4.05 |
| IPI00376427 | Neural cell adhesion molecule 2 precursor | K.QDDGGAPILEYIVK.Y           | 2 | 4.17 | 0.37 | -3.98 |
| IPI00376427 | Neural cell adhesion molecule 2 precursor | K.QGEDAEVVC.R                | 2 | 3.49 | 0.39 | -2.48 |
| IPI00376427 | Neural cell adhesion molecule 2 precursor | K.RAVDGFTFTEGDKSPDGR.I       | 3 | 3.48 | 0.41 | -3.51 |
| IPI00376427 | Neural cell adhesion molecule 2 precursor | K.RAVDGFTFTEGDKSPDGR.I       | 4 | 3.09 | 0.22 | -2.67 |
| IPI00376427 | Neural cell adhesion molecule 2 precursor | K.SDEGIYR.C                  | 2 | 1.77 | 0.07 | -3.52 |
| IPI00376427 | Neural cell adhesion molecule 2 precursor | K.SFKLSITKQDDGGAPILEYIVK.Y   | 3 | 4.60 | 0.46 | -5.13 |
| IPI00376427 | Neural cell adhesion molecule 2 precursor | K.SFKLSITKQDDGGAPILEYIVK.Y   | 4 | 3.24 | 0.14 | -3.66 |
| IPI00376427 | Neural cell adhesion molecule 2 precursor | K.SM*YLDIEYAPK.F             | 1 | 2.32 | 0.23 | -3.84 |
| IPI00376427 | Neural cell adhesion molecule 2 precursor | K.SM*YLDIEYAPK.F             | 2 | 4.15 | 0.41 | -4.03 |
| IPI00376427 | Neural cell adhesion molecule 2 precursor | K.VELSVGESK.F                | 1 | 2.00 | 0.30 | -4.08 |
| IPI00376427 | Neural cell adhesion molecule 2 precursor | K.VELSVGESK.F                | 2 | 2.88 | 0.26 | -2.87 |
| IPI00376427 | Neural cell adhesion molecule 2 precursor | K.VSFNKPDSHGVPPIHHYQVDVK.E   | 3 | 4.13 | 0.35 | -5.10 |
| IPI00376427 | Neural cell adhesion molecule 2 precursor | R.ASGSPEPAISWFR.N            | 2 | 3.07 | 0.29 | -3.81 |
| IPI00376427 | Neural cell adhesion molecule 2 precursor | R.ATNKAGEDEKQAFLQVQPH.I      | 3 | 4.01 | 0.46 | -3.19 |
| IPI00376427 | Neural cell adhesion molecule 2 precursor | R.AVDGFTFTEGDK.S             | 1 | 2.30 | 0.41 | -1.77 |
| IPI00376427 | Neural cell adhesion molecule 2 precursor | R.AVDGFTFTEGDK.S             | 2 | 3.62 | 0.46 | -1.17 |
| IPI00376427 | Neural cell adhesion molecule 2 precursor | R.AVDGFTFTEGDKSPDGR.I        | 2 | 3.92 | 0.47 | -2.63 |
| IPI00376427 | Neural cell adhesion molecule 2 precursor | R.AVDGFTFTEGDKSPDGR.I        | 3 | 2.84 | 0.33 | -2.61 |
| IPI00376427 | Neural cell adhesion molecule 2 precursor | R.AVDGFTFTEGDKSPDGR.IEVK.G   | 3 | 3.20 | 0.25 | -3.86 |
| IPI00376427 | Neural cell adhesion molecule 2 precursor | R.DIIVVNVPPAISM*PQK.S        | 2 | 3.96 | 0.32 | -6.67 |
| IPI00376427 | Neural cell adhesion molecule 2 precursor | R.EVVSPQEFK.Q                | 1 | 1.81 | 0.17 | -2.49 |
| IPI00376427 | Neural cell adhesion molecule 2 precursor | R.EVVSPQEFK.Q                | 2 | 2.27 | 0.15 | -3.90 |
| IPI00376427 | Neural cell adhesion molecule 2 precursor | R.EVVSPQEFKQGEDAEVVC.R       | 2 | 4.55 | 0.51 | -2.05 |
| IPI00376427 | Neural cell adhesion molecule 2 precursor | R.EVVSPQEFKQGEDAEVVC.R       | 3 | 3.63 | 0.45 | -0.87 |
| IPI00376427 | Neural cell adhesion molecule 2 precursor | R.FQEYILALADVPSSPYGVK.I      | 2 | 4.65 | 0.53 | -4.43 |
| IPI00376427 | Neural cell adhesion molecule 2 precursor | R.FQEYILALADVPSSPYGVK.I      | 3 | 3.98 | 0.37 | -3.70 |
| IPI00376427 | Neural cell adhesion molecule 2 precursor | R.KM*ILEIAPTSNDNDFGR.Y       | 3 | 2.90 | 0.08 | -3.11 |
| IPI00376427 | Neural cell adhesion molecule 2 precursor | R.LGYSEPTVYEFM*PPKPNIK.D     | 2 | 4.04 | 0.45 | -1.24 |
| IPI00376427 | Neural cell adhesion molecule 2 precursor | R.LGYSEPTVYEFM*PPKPNIK.D     | 3 | 3.80 | 0.51 | -1.94 |
| IPI00376427 | Neural cell adhesion molecule 2 precursor | R.LTIYNANIEDAGIYR.C          | 2 | 4.94 | 0.51 | -5.08 |

|             |                                           |                                    |   |      |      |       |
|-------------|-------------------------------------------|------------------------------------|---|------|------|-------|
| IPI00376427 | Neural cell adhesion molecule 2 precursor | R.NIINSDGGPYVCR.A                  | 2 | 3.83 | 0.42 | -4.04 |
| IPI00376427 | Neural cell adhesion molecule 2 precursor | R.SRLTIYNANIEDAGIYR.C              | 2 | 4.08 | 0.42 | -3.27 |
| IPI00376427 | Neural cell adhesion molecule 2 precursor | R.SRLTIYNANIEDAGIYR.C              | 3 | 3.18 | 0.22 | -2.89 |
| IPI00376427 | Neural cell adhesion molecule 2 precursor | R.VSSSPAPAVSWLYHNNEEVTTISDNR.L     | 2 | 4.87 | 0.59 | -3.32 |
| IPI00376427 | Neural cell adhesion molecule 2 precursor | R.VSSSPAPAVSWLYHNNEEVTTISDNR.L     | 3 | 3.72 | 0.43 | -4.36 |
| IPI00376587 | Uncharacterized protein ENSP00000345065   | R.HFKSKTDSNSKK.C                   | 2 | 1.83 | 0.19 |       |
| IPI00376689 | Isoform 1 of Protein KIAA1199 precursor   | K.GGALELHGQKK.L                    | 2 | 2.91 | 0.12 | -2.63 |
| IPI00376689 | Isoform 1 of Protein KIAA1199 precursor   | K.IFQVVPIPVVK.K                    | 2 | 3.19 | 0.32 | -4.42 |
| IPI00376689 | Isoform 1 of Protein KIAA1199 precursor   | K.NDFPSHPLYLEGALTR.S               | 3 | 3.39 | 0.34 | -1.24 |
| IPI00376689 | Isoform 1 of Protein KIAA1199 precursor   | K.SGTVIHSDFRFDYR.S                 | 2 | 3.09 | 0.33 | -2.43 |
| IPI00376689 | Isoform 1 of Protein KIAA1199 precursor   | R.ADEGIQPDPPYYGLK.Y                | 2 | 3.71 | 0.17 | -3.49 |
| IPI00376689 | Isoform 1 of Protein KIAA1199 precursor   | R.AEVGLLSR.N                       | 2 | 2.30 | 0.08 | -2.48 |
| IPI00376689 | Isoform 1 of Protein KIAA1199 precursor   | R.DLSIHHTFSR.C                     | 2 | 2.69 | 0.30 | -2.99 |
| IPI00376689 | Isoform 1 of Protein KIAA1199 precursor   | R.FADNGIGLTLASGGTFPYDDGSKQEIK.N    | 3 | 3.54 | 0.24 | -2.95 |
| IPI00376689 | Isoform 1 of Protein KIAA1199 precursor   | R.ILSVAVNDEGSR.N                   | 2 | 3.13 | 0.39 | -0.96 |
| IPI00376689 | Isoform 1 of Protein KIAA1199 precursor   | R.KFVALEGR.H                       | 2 | 1.87 | 0.15 | -1.91 |
| IPI00376689 | Isoform 1 of Protein KIAA1199 precursor   | R.LVQYLNVAVPDGR.I                  | 2 | 2.54 | 0.11 | -3.24 |
| IPI00376689 | Isoform 1 of Protein KIAA1199 precursor   | R.NIIVM*GEM*EDK.C                  | 2 | 2.84 | 0.21 | -3.49 |
| IPI00376689 | Isoform 1 of Protein KIAA1199 precursor   | R.TLQM*DKVEQSYPPGR.S               | 3 | 3.17 | 0.34 | -2.81 |
| IPI00377045 | Alpha3A                                   | R.FNKTKTFRINQLLQDTPVASPR.S         | 3 | 3.41 | 0.15 |       |
| IPI00377077 | Isoform 3 of Astrotactin-2 precursor      | R.AGAGAGTGAGAAAAASPGSPGSAGTAAESR.L | 3 | 4.31 | 0.38 | -3.77 |
| IPI00382420 | Ig lambda chain V-I region HA             | K.SGTSASLAISGLR.S                  | 1 | 2.82 | 0.39 |       |
| IPI00382420 | Ig lambda chain V-I region HA             | K.SGTSASLAISGLR.S                  | 2 | 3.92 | 0.23 |       |
| IPI00382421 | Ig lambda chain V-I region NEW            | K.SGTSATLGITGLR.T                  | 2 | 2.63 | 0.18 |       |
| IPI00382442 | Ig lambda chain V-V region DEL            | -.YVLSQPPSVSVAPGQTAR.I             | 2 | 3.38 | 0.43 |       |
| IPI00382442 | Ig lambda chain V-V region DEL            | R.FSGSNSGNTAALTISR.V               | 2 | 3.46 | 0.21 |       |
| IPI00382474 | Ig heavy chain V-III region TRO           | R.DNAQKSLYLZM*BSLR.T               | 3 | 4.53 | 0.06 |       |
| IPI00382476 | Ig heavy chain V-III region WEA           | -.QVQLVDSGGGLVEPGGSLR.L            | 2 | 4.00 | 0.09 |       |
| IPI00382476 | Ig heavy chain V-III region WEA           | K.NSLYLQMSLR.A                     | 2 | 3.54 | 0.30 |       |
| IPI00382478 | Ig heavy chain V-III region TIL           | C.EVQLLESGGGLVQPGGSLR.L            | 1 | 4.02 | 0.09 |       |
| IPI00382478 | Ig heavy chain V-III region TIL           | C.EVQLLESGGGLVQPGGSLR.L            | 2 | 5.62 | 0.07 |       |
| IPI00382478 | Ig heavy chain V-III region TIL           | R.FTISRDDSK.N                      | 2 | 2.52 | 0.15 |       |
| IPI00382481 | Ig heavy chain V-III region BUT           | -.EVQLVETGGGLIQPGGSLR.L            | 2 | 5.85 | 0.23 |       |
| IPI00382481 | Ig heavy chain V-III region BUT           | -.EVQLVETGGGLIQPGGSLR.L            | 3 | 4.13 | 0.05 |       |
| IPI00382481 | Ig heavy chain V-III region BUT           | R.BTVYLQM*BSLR.A                   | 2 | 2.88 | 0.14 |       |
| IPI00382481 | Ig heavy chain V-III region BUT           | R.BTVYLQMBSLR.A                    | 2 | 4.02 | 0.14 |       |
| IPI00382482 | Ig heavy chain V-III region CAM           | R.DBSKBTLYLQMNLSR.A                | 2 | 4.43 | 0.10 |       |
| IPI00382482 | Ig heavy chain V-III region CAM           | R.LSCAASGFTFSNYAMHWVR.Q            | 2 | 3.75 | 0.31 |       |
| IPI00382486 | Ig heavy chain V-III region NIE           | R.LSCAASGFTFSR.Y                   | 1 | 2.80 | 0.05 |       |
| IPI00382486 | Ig heavy chain V-III region NIE           | R.LSCAASGFTFSR.Y                   | 2 | 4.44 | 0.08 |       |
| IPI00382488 | Ig heavy chain V-III region HIL           | -.QVKLVQAGGGVVQPGR.S               | 1 | 3.69 | 0.23 |       |
| IPI00382488 | Ig heavy chain V-III region HIL           | -.QVKLVQAGGGVVQPGR.S               | 2 | 4.10 | 0.21 |       |



|             |                                               |                                             |   |      |      |       |
|-------------|-----------------------------------------------|---------------------------------------------|---|------|------|-------|
| IPI00382488 | Ig heavy chain V-III region HIL               | R.TEDTAVYYCAR.D                             | 2 | 4.05 | 0.24 |       |
| IPI00382493 | Ig heavy chain V-III region WAS               | C.EVQLLESGGGLVQPGGSLR.L                     | 1 | 4.02 | 0.09 |       |
| IPI00382493 | Ig heavy chain V-III region WAS               | C.EVQLLESGGGLVQPGGSLR.L                     | 2 | 5.62 | 0.07 |       |
| IPI00382493 | Ig heavy chain V-III region WAS               | K.NTLYLQM*NR.L                              | 2 | 1.98 | 0.23 |       |
| IPI00382499 | Ig heavy chain V-III region JON               | -.DVQLVESGGGLVKPGGSLR.L                     | 2 | 5.73 | 0.33 |       |
| IPI00382499 | Ig heavy chain V-III region JON               | -.DVQLVESGGGLVKPGGSLR.L                     | 3 | 5.56 | 0.18 |       |
| IPI00382500 | Ig heavy chain V-III region GAL               | -.EVQLVESGGDLVQPGR.S                        | 2 | 3.14 | 0.24 |       |
| IPI00382500 | Ig heavy chain V-III region GAL               | -.EVQLVESGGDLVQPGR.S                        | 3 | 4.56 | 0.09 |       |
| IPI00382500 | Ig heavy chain V-III region GAL               | K.GLEWVANIK.Z                               | 1 | 2.05 | 0.11 |       |
| IPI00382500 | Ig heavy chain V-III region GAL               | K.GLEWVANIK.Z                               | 2 | 3.69 | 0.25 |       |
| IPI00382500 | Ig heavy chain V-III region GAL               | K.NSLYLQM*NSLR.A                            | 2 | 3.76 | 0.14 |       |
| IPI00382500 | Ig heavy chain V-III region GAL               | K.NSLYLQMNSLR.A                             | 1 | 3.55 | 0.11 |       |
| IPI00382500 | Ig heavy chain V-III region GAL               | K.NSLYLQMNSLR.A                             | 2 | 4.01 | 0.17 |       |
| IPI00382500 | Ig heavy chain V-III region GAL               | R.DNAKNSLYLQM*NSLR.A                        | 2 | 4.82 | 0.44 |       |
| IPI00382500 | Ig heavy chain V-III region GAL               | R.DNAKNSLYLQM*NSLR.A                        | 3 | 4.39 | 0.37 |       |
| IPI00382500 | Ig heavy chain V-III region GAL               | R.VEDTALYYCAR.D                             | 2 | 4.55 | 0.38 |       |
| IPI00382515 | CDNA FLJ30384 fis, clone BRACE2008114         | -.MMSFTCFSTFNHRTLSPQLVQVK.L                 | 3 | 2.97 | 0.20 |       |
| IPI00382606 | Factor VII active site mutant immunoconjugate | C.DKTHTCPAPPELLGGPSVFLFPPKPK.D              | 3 | 6.55 | 0.38 |       |
| IPI00382606 | Factor VII active site mutant immunoconjugate | K.ALPAPIEK.T                                | 1 | 1.81 | 0.11 |       |
| IPI00382606 | Factor VII active site mutant immunoconjugate | K.CKVSNKALPAPIEK.T                          | 2 | 2.28 | 0.15 |       |
| IPI00382606 | Factor VII active site mutant immunoconjugate | K.DTLM*ISR.T                                | 2 | 2.48 | 0.09 | -3.74 |
| IPI00382606 | Factor VII active site mutant immunoconjugate | K.DTLMISR.T                                 | 1 | 2.38 | 0.13 |       |
| IPI00382606 | Factor VII active site mutant immunoconjugate | K.DTLMISR.T                                 | 2 | 2.45 | 0.16 |       |
| IPI00382606 | Factor VII active site mutant immunoconjugate | K.FNWYVDGVEVHNAK.T                          | 1 | 3.93 | 0.41 |       |
| IPI00382606 | Factor VII active site mutant immunoconjugate | K.FNWYVDGVEVHNAK.T                          | 2 | 5.51 | 0.51 |       |
| IPI00382606 | Factor VII active site mutant immunoconjugate | K.FNWYVDGVEVHNAK.T                          | 3 | 3.99 | 0.38 |       |
| IPI00382606 | Factor VII active site mutant immunoconjugate | K.GFYPSDIAVEWESNGQPENNYK.T                  | 2 | 4.88 | 0.31 |       |
| IPI00382606 | Factor VII active site mutant immunoconjugate | K.GFYPSDIAVEWESNGQPENNYK.T                  | 3 | 4.56 | 0.26 |       |
| IPI00382606 | Factor VII active site mutant immunoconjugate | K.GFYPSDIAVEWESNGQPENNYKTTTPVLDSGDSFFLYSK.L | 3 | 4.64 | 0.25 |       |
| IPI00382606 | Factor VII active site mutant immunoconjugate | K.GQPREPQVYTLPPSR.E                         | 2 | 2.89 | 0.13 |       |
| IPI00382606 | Factor VII active site mutant immunoconjugate | K.GQPREPQVYTLPPSR.E                         | 3 | 2.92 | 0.17 |       |
| IPI00382606 | Factor VII active site mutant immunoconjugate | K.GQPREPQVYTLPPSRDELTK.N                    | 3 | 4.51 | 0.32 |       |
| IPI00382606 | Factor VII active site mutant immunoconjugate | K.NQVSLTCLVK.G                              | 1 | 2.26 | 0.22 |       |
| IPI00382606 | Factor VII active site mutant immunoconjugate | K.NQVSLTCLVK.G                              | 2 | 2.44 | 0.28 | -2.15 |
| IPI00382606 | Factor VII active site mutant immunoconjugate | K.SCDKTHTCPAPPELLGGPSVFLFPPKPK.D            | 3 | 6.71 | 0.47 |       |
| IPI00382606 | Factor VII active site mutant immunoconjugate | K.THTCPPAPPELLGGPSVFLFPPKPK.D               | 2 | 3.81 | 0.39 |       |
| IPI00382606 | Factor VII active site mutant immunoconjugate | K.THTCPPAPPELLGGPSVFLFPPKPK.D               | 3 | 6.29 | 0.52 |       |
| IPI00382606 | Factor VII active site mutant immunoconjugate | K.TKPREEQYNSTYR.V                           | 2 | 2.99 | 0.10 |       |
| IPI00382606 | Factor VII active site mutant immunoconjugate | K.TTPPVLDSDGSFFLYSK.L                       | 1 | 3.22 | 0.41 |       |
| IPI00382606 | Factor VII active site mutant immunoconjugate | K.TTPPVLDSDGSFFLYSK.L                       | 2 | 3.42 | 0.37 |       |
| IPI00382606 | Factor VII active site mutant immunoconjugate | K.TTPPVLDSDGSFFLYSK.L                       | 3 | 4.11 | 0.39 |       |
| IPI00382606 | Factor VII active site mutant immunoconjugate | K.VSNKALPAPIEK.T                            | 2 | 3.33 | 0.18 |       |

|             |                                               |                                                |   |      |      |       |
|-------------|-----------------------------------------------|------------------------------------------------|---|------|------|-------|
| IPI00382606 | Factor VII active site mutant immunoconjugate | K.WYVDGVEVHNAK.T                               | 1 | 2.91 | 0.35 |       |
| IPI00382606 | Factor VII active site mutant immunoconjugate | K.WYVDGVEVHNAK.T                               | 2 | 3.90 | 0.46 |       |
| IPI00382606 | Factor VII active site mutant immunoconjugate | K.WYVDGVEVHNAK.T                               | 3 | 2.99 | 0.21 |       |
| IPI00382606 | Factor VII active site mutant immunoconjugate | R.CPAPELLGGPSVFLFPPKPK.D                       | 2 | 4.00 | 0.37 |       |
| IPI00382606 | Factor VII active site mutant immunoconjugate | R.CPAPELLGGPSVFLFPPKPK.D                       | 3 | 6.31 | 0.49 |       |
| IPI00382606 | Factor VII active site mutant immunoconjugate | R.CPAPELLGGPSVFLFPPKPKDTLM*ISR.T               | 3 | 3.77 | 0.23 |       |
| IPI00382606 | Factor VII active site mutant immunoconjugate | R.EPQVYTLPPSRDELTK.N                           | 2 | 3.97 | 0.21 |       |
| IPI00382606 | Factor VII active site mutant immunoconjugate | R.EPQVYTLPPSRDELTKNQVSLTCLVK.G                 | 3 | 4.03 | 0.23 |       |
| IPI00382606 | Factor VII active site mutant immunoconjugate | R.TPEVTCVVVDVSHED.P                            | 2 | 5.50 | 0.52 |       |
| IPI00382606 | Factor VII active site mutant immunoconjugate | R.VAQVIIPSTYVPGTTNHDIALLR.L                    | 3 | 2.74 | 0.15 | -1.66 |
| IPI00382606 | Factor VII active site mutant immunoconjugate | R.VVSVLTVLHQDWLNGK.E                           | 1 | 4.22 | 0.41 |       |
| IPI00382606 | Factor VII active site mutant immunoconjugate | R.VVSVLTVLHQDWLNGK.E                           | 2 | 5.39 | 0.46 |       |
| IPI00382606 | Factor VII active site mutant immunoconjugate | R.VVSVLTVLHQDWLNGK.E                           | 3 | 3.42 | 0.38 |       |
| IPI00382606 | Factor VII active site mutant immunoconjugate | R.VVSVLTVLHQDWLNGKEYK.C                        | 2 | 5.56 | 0.40 |       |
| IPI00382606 | Factor VII active site mutant immunoconjugate | R.VVSVLTVLHQDWLNGKEYK.C                        | 3 | 4.97 | 0.40 |       |
| IPI00382682 | Putative matrix cell adhesion molecule-3      | R.DTSTSTVYM*DLSSLR.S                           | 2 | 3.22 | 0.29 |       |
| IPI00382682 | Putative matrix cell adhesion molecule-3      | R.SDDTAVYFCAR.E                                | 2 | 3.45 | 0.27 |       |
| IPI00382756 | Isoform 2 of Pleiotropic regulator 1          | K.EKGPQNATDSYVHKQYPANQGQVEVEYFVAGVALTADTKIQR.M | 4 | 4.03 | 0.23 | 1.70  |
| IPI00382938 | IGLV4-3 protein                               | K.AAPSVTLFPPSSEELQANK.A                        | 1 | 4.04 | 0.50 |       |
| IPI00382938 | IGLV4-3 protein                               | K.AAPSVTLFPPSSEELQANK.A                        | 2 | 3.15 | 0.34 | -1.50 |
| IPI00382938 | IGLV4-3 protein                               | K.AAPSVTLFPPSSEELQANK.A                        | 3 | 3.32 | 0.13 |       |
| IPI00382938 | IGLV4-3 protein                               | K.ADSSPVKAGVETTTPSK.Q                          | 1 | 3.85 | 0.37 |       |
| IPI00382938 | IGLV4-3 protein                               | K.ADSSPVKAGVETTTPSK.Q                          | 2 | 3.50 | 0.38 |       |
| IPI00382938 | IGLV4-3 protein                               | K.ADSSPVKAGVETTTPSK.Q                          | 3 | 3.46 | 0.35 |       |
| IPI00382938 | IGLV4-3 protein                               | K.ADSSPVKAGVETTTPSKQSNK.Y                      | 2 | 5.35 | 0.42 |       |
| IPI00382938 | IGLV4-3 protein                               | K.ADSSPVKAGVETTTPSKQSNK.Y                      | 3 | 4.61 | 0.23 |       |
| IPI00382938 | IGLV4-3 protein                               | K.AGVETTTPSK.Q                                 | 2 | 2.62 | 0.09 | -3.23 |
| IPI00382938 | IGLV4-3 protein                               | K.AGVETTTPSKQSNK.Y                             | 2 | 4.14 | 0.32 |       |
| IPI00382938 | IGLV4-3 protein                               | K.AGVETTTPSKQSNKYAASSYLSLTPEQWK.S              | 3 | 5.47 | 0.40 |       |
| IPI00382938 | IGLV4-3 protein                               | K.ATLVCLISDFYPGAVTVAWK.A                       | 2 | 5.07 | 0.50 |       |
| IPI00382938 | IGLV4-3 protein                               | K.ATLVCLISDFYPGAVTVAWK.A                       | 3 | 3.53 | 0.31 | -3.63 |
| IPI00382938 | IGLV4-3 protein                               | K.ATLVCLISDFYPGAVTVAWKADSSPVK.A                | 3 | 3.81 | 0.20 |       |
| IPI00382938 | IGLV4-3 protein                               | K.QSNNKYAASSYLSLTPEQWK.S                       | 2 | 5.38 | 0.37 |       |
| IPI00382938 | IGLV4-3 protein                               | K.QSNNKYAASSYLSLTPEQWK.S                       | 3 | 4.26 | 0.33 |       |
| IPI00382938 | IGLV4-3 protein                               | K.YAASSYLSLTPEQWK.S                            | 1 | 3.49 | 0.43 |       |
| IPI00382938 | IGLV4-3 protein                               | K.YAASSYLSLTPEQWK.S                            | 2 | 5.52 | 0.47 |       |
| IPI00382938 | IGLV4-3 protein                               | K.YAASSYLSLTPEQWK.S                            | 3 | 3.44 | 0.22 |       |
| IPI00382938 | IGLV4-3 protein                               | R.FM*GSSSGADR.Y                                | 2 | 2.49 | 0.25 |       |
| IPI00382938 | IGLV4-3 protein                               | R.SYSCQVTHEGSTVEK.T                            | 1 | 3.84 | 0.43 |       |
| IPI00382938 | IGLV4-3 protein                               | R.SYSCQVTHEGSTVEK.T                            | 2 | 3.17 | 0.41 | -4.10 |
| IPI00382938 | IGLV4-3 protein                               | R.SYSCQVTHEGSTVEKTVAPTECS.-                    | 2 | 5.35 | 0.45 |       |
| IPI00382938 | IGLV4-3 protein                               | R.SYSCQVTHEGSTVEKTVAPTECS.-                    | 3 | 2.78 | 0.26 |       |

|             |                                                                                                             |                                    |   |      |      |       |
|-------------|-------------------------------------------------------------------------------------------------------------|------------------------------------|---|------|------|-------|
| IPI00383016 | Immunoglobulin light chain variable region (Fragment)                                                       | K.LLIYDNNKRPSGVPDR.F               | 2 | 2.91 | 0.12 |       |
| IPI00383032 | Isoform 2 of Hepatitis A virus cellular receptor 2 precursor                                                | R.AEVGQNAYLPCFYTPAAPGNLVPVCWGK.G   | 3 | 3.71 | 0.35 | -5.43 |
| IPI00383032 | Isoform 2 of Hepatitis A virus cellular receptor 2 precursor                                                | R.DVNYWTSR.Y                       | 2 | 2.22 | 0.26 | -2.19 |
| IPI00383032 | Isoform 2 of Hepatitis A virus cellular receptor 2 precursor                                                | R.IQIPGIM*NDEKFNLK.L               | 2 | 2.84 | 0.19 | -2.14 |
| IPI00383594 | melanoma ubiquitous mutated protein                                                                         | R.GGNSAQKASLCLNGSSLSSEDDTERDMGSK.G | 3 | 2.76 | 0.24 | 2.67  |
| IPI00383603 | Anti-thyroglobulin light chain variable region (Fragment)                                                   | K.VTISCSGSSSNIGK.N                 | 2 | 4.04 | 0.49 |       |
| IPI00383680 | Ribophorin II                                                                                               | K.ASLDRPFTNLESAFYIVGLSSLGAQVPDAK.K | 3 | 3.07 | 0.09 | -4.42 |
| IPI00383680 | Ribophorin II                                                                                               | R.LSKEETVLATVQALQTASHLSQQADLR.S    | 3 | 3.22 | 0.29 | -3.05 |
| IPI00383680 | Ribophorin II                                                                                               | R.LSKEETVLATVQALQTASHLSQQADLR.S    | 4 | 3.63 | 0.34 | -4.68 |
| IPI00383732 | VH3 protein (Fragment)                                                                                      | K.GPSVFPLAPSSK.S                   | 1 | 3.15 | 0.35 |       |
| IPI00383732 | VH3 protein (Fragment)                                                                                      | K.GPSVFPLAPSSK.S                   | 2 | 3.30 | 0.36 |       |
| IPI00383732 | VH3 protein (Fragment)                                                                                      | K.NTLYLQM*TSLR.V                   | 2 | 2.68 | 0.11 |       |
| IPI00383732 | VH3 protein (Fragment)                                                                                      | K.NTLYLQMTSLR.V                    | 2 | 2.59 | 0.28 |       |
| IPI00383732 | VH3 protein (Fragment)                                                                                      | R.VEDTAVYYCAK.D                    | 2 | 3.33 | 0.21 |       |
| IPI00383808 | Ig kappa chain V-IV region STH (Fragment)                                                                   | -.DIVM*TQSPDSLVLVSLGER.A           | 2 | 4.08 | 0.23 |       |
| IPI00383832 | Protein kinase C-binding protein RACK8                                                                      | -.MGETKIYHLDGQETPYLVKLPPLAER.V     | 3 | 2.91 | 0.09 | -4.40 |
| IPI00383887 | Immunoglobulin heavy chain (Fragment)                                                                       | K.NTLYLQMNSLR.A                    | 1 | 3.28 | 0.09 |       |
| IPI00383887 | Immunoglobulin heavy chain (Fragment)                                                                       | K.NTLYLQMNSLR.A                    | 2 | 4.45 | 0.07 |       |
| IPI00383887 | Immunoglobulin heavy chain (Fragment)                                                                       | R.DNSKNTLYLQM*NSLR.A               | 2 | 3.02 | 0.07 |       |
| IPI00383887 | Immunoglobulin heavy chain (Fragment)                                                                       | R.DNSKNTLYLQM*NSLR.A               | 3 | 3.90 | 0.23 |       |
| IPI00383951 | Isoform 3 of Protein sidekick-1 precursor                                                                   | R.DDSELTTYSEYK.Y                   | 2 | 3.44 | 0.48 | -2.06 |
| IPI00383951 | Isoform 3 of Protein sidekick-1 precursor                                                                   | R.M*GALLQR.Q                       | 2 | 2.22 | 0.18 | -2.78 |
| IPI00383953 | VH4 heavy chain variable region precursor (Fragment)                                                        | K.LSSVTAADTAVYYCAR.-               | 2 | 5.61 | 0.50 |       |
| IPI00383953 | VH4 heavy chain variable region precursor (Fragment)                                                        | K.LSSVTAADTAVYYCAR.-               | 3 | 4.55 | 0.30 |       |
| IPI00384016 | Full-length cDNA 5-PRIME end of clone CS0DJ009YL13 of T cells (Jurkat cell line) of Homo sapiens (Fragment) | K.TPAFAESVTEGDVR.W                 | 2 | 3.90 | 0.45 | -2.89 |
| IPI00384016 | Full-length cDNA 5-PRIME end of clone CS0DJ009YL13 of T cells (Jurkat cell line) of Homo sapiens (Fragment) | K.VEGGTPLFLTR.K                    | 2 | 2.82 | 0.34 | -1.83 |
| IPI00384051 | Uncharacterized protein PSME2                                                                               | R.QNLFQEAEEFLYR.F                  | 2 | 3.58 | 0.33 | -4.93 |
| IPI00384225 | Meteorin precursor                                                                                          | R.AGGALELLLAEGPGPAGGR.C            | 2 | 2.78 | 0.28 | -3.71 |
| IPI00384225 | Meteorin precursor                                                                                          | R.AGGALELLLAEGPGPAGGR.C            | 3 | 2.30 | 0.16 | -3.05 |
| IPI00384391 | Myosin-reactive immunoglobulin heavy chain variable region (Fragment)                                       | -.EVQLVESGGGVVQPGGSLR.L            | 2 | 3.96 | 0.22 |       |

|             |                                                                       |                             |   |      |      |  |
|-------------|-----------------------------------------------------------------------|-----------------------------|---|------|------|--|
| IPI00384391 | Myosin-reactive immunoglobulin heavy chain variable region (Fragment) | -.EVQLVESGGGVVQPGGSLR.L     | 3 | 4.24 | 0.07 |  |
| IPI00384391 | Myosin-reactive immunoglobulin heavy chain variable region (Fragment) | K.NSLYLQM*NSLR.A            | 2 | 3.76 | 0.14 |  |
| IPI00384391 | Myosin-reactive immunoglobulin heavy chain variable region (Fragment) | K.NSLYLQMNSLR.A             | 1 | 3.55 | 0.11 |  |
| IPI00384391 | Myosin-reactive immunoglobulin heavy chain variable region (Fragment) | K.NSLYLQMNSLR.A             | 2 | 4.01 | 0.17 |  |
| IPI00384391 | Myosin-reactive immunoglobulin heavy chain variable region (Fragment) | R.AEDTALYYCAK.H             | 2 | 3.60 | 0.41 |  |
| IPI00384391 | Myosin-reactive immunoglobulin heavy chain variable region (Fragment) | R.DNSKNSLYLQM*NSLR.A        | 2 | 4.94 | 0.16 |  |
| IPI00384391 | Myosin-reactive immunoglobulin heavy chain variable region (Fragment) | R.DNSKNSLYLQM*NSLR.A        | 3 | 4.24 | 0.22 |  |
| IPI00384392 | Myosin-reactive immunoglobulin heavy chain variable region (Fragment) | K.NTLYLQMNSLR.A             | 1 | 3.28 | 0.09 |  |
| IPI00384392 | Myosin-reactive immunoglobulin heavy chain variable region (Fragment) | K.NTLYLQMNSLR.A             | 2 | 4.45 | 0.07 |  |
| IPI00384392 | Myosin-reactive immunoglobulin heavy chain variable region (Fragment) | R.AEDTAFYYCAR.D             | 2 | 3.82 | 0.39 |  |
| IPI00384392 | Myosin-reactive immunoglobulin heavy chain variable region (Fragment) | R.DNSKNTLYLQM*NSLR.A        | 2 | 3.02 | 0.07 |  |
| IPI00384392 | Myosin-reactive immunoglobulin heavy chain variable region (Fragment) | R.DNSKNTLYLQM*NSLR.A        | 3 | 3.90 | 0.23 |  |
| IPI00384395 | Myosin-reactive immunoglobulin heavy chain variable region            | K.NQFSLQLNSVTPEDTAVYYCAR.-  | 2 | 4.75 | 0.24 |  |
| IPI00384395 | Myosin-reactive immunoglobulin heavy chain variable region            | K.SRITINPDTSK.N             | 2 | 2.84 | 0.24 |  |
| IPI00384400 | Myosin-reactive immunoglobulin heavy chain variable region (Fragment) | -.EVQLVESGGGVVQPGR.S        | 2 | 3.37 | 0.07 |  |
| IPI00384400 | Myosin-reactive immunoglobulin heavy chain variable region (Fragment) | K.NM*M*DLQMNSLR.A           | 2 | 2.86 | 0.16 |  |
| IPI00384402 | Myosin-reactive immunoglobulin kappa chain variable region (Fragment) | R.ASQSVSSSYLAWYQQKPGQAPR.L  | 2 | 5.52 | 0.40 |  |
| IPI00384402 | Myosin-reactive immunoglobulin kappa chain variable region (Fragment) | R.ASQSVSSSYLAWYQQKPGQAPR.L  | 3 | 3.59 | 0.29 |  |
| IPI00384402 | Myosin-reactive immunoglobulin kappa chain variable region (Fragment) | R.ATGIPDRFSGSGSETDFTLTISR.L | 3 | 3.38 | 0.11 |  |
| IPI00384402 | Myosin-reactive immunoglobulin kappa chain variable region (Fragment) | R.FSGSGSETDFTLTISR.L        | 2 | 4.26 | 0.48 |  |
| IPI00384404 | Rheumatoid factor RF-ET9 (Fragment)                                   | K.NTLYLQM*NSLK.T            | 2 | 2.43 | 0.12 |  |
| IPI00384404 | Rheumatoid factor RF-ET9 (Fragment)                                   | K.NTLYLQMNSLK.T             | 2 | 3.59 | 0.08 |  |

|             |                                                                       |                                        |   |      |      |       |
|-------------|-----------------------------------------------------------------------|----------------------------------------|---|------|------|-------|
| IPI00384404 | Rheumatoid factor RF-ET9 (Fragment)                                   | R.DDSKNTLYLQM*NSLK.T                   | 2 | 4.53 | 0.27 |       |
| IPI00384404 | Rheumatoid factor RF-ET9 (Fragment)                                   | R.DDSKNTLYLQM*NSLK.T                   | 3 | 3.61 | 0.23 |       |
| IPI00384404 | Rheumatoid factor RF-ET9 (Fragment)                                   | R.FTISRDDSK.N                          | 2 | 2.52 | 0.15 |       |
| IPI00384407 | Myosin-reactive immunoglobulin heavy chain variable region (Fragment) | -.EVQLVESGAEVK.K                       | 2 | 5.25 | 0.25 |       |
| IPI00384407 | Myosin-reactive immunoglobulin heavy chain variable region (Fragment) | R.DTSTSTVYMESSLR.S                     | 2 | 3.00 | 0.09 |       |
| IPI00384542 | Isoform 2 of Nidogen-1 precursor                                      | C.LSRQELFFPGPGQGDELEDGDDFVSPAELSGALR.F | 3 | 7.07 | 0.58 | -3.86 |
| IPI00384542 | Isoform 2 of Nidogen-1 precursor                                      | K.AFLHHPAK.V                           | 2 | 2.41 | 0.09 | -2.92 |
| IPI00384542 | Isoform 2 of Nidogen-1 precursor                                      | K.ALEGLQYPPAVTSYK.N                    | 2 | 4.93 | 0.55 | -4.69 |
| IPI00384542 | Isoform 2 of Nidogen-1 precursor                                      | K.ESHPGLFPPTFGAVAPFLADLDTTDGLGK.V      | 3 | 5.87 | 0.56 | -4.74 |
| IPI00384542 | Isoform 2 of Nidogen-1 precursor                                      | K.ETDAFQPHKQTR.L                       | 2 | 2.79 | 0.32 | -2.24 |
| IPI00384542 | Isoform 2 of Nidogen-1 precursor                                      | K.IETSYM*DGTNR.R                       | 2 | 2.55 | 0.23 | -2.29 |
| IPI00384542 | Isoform 2 of Nidogen-1 precursor                                      | K.M*VYWTDITEPSIGR.A                    | 2 | 4.28 | 0.40 | -2.60 |
| IPI00384542 | Isoform 2 of Nidogen-1 precursor                                      | K.NGFSITGGEFTR.Q                       | 2 | 2.97 | 0.28 | -4.62 |
| IPI00384542 | Isoform 2 of Nidogen-1 precursor                                      | K.VIIGLAFDCVVK.M                       | 2 | 3.99 | 0.45 | -3.02 |
| IPI00384542 | Isoform 2 of Nidogen-1 precursor                                      | K.VYYREDLSPSITQR.A                     | 2 | 4.43 | 0.45 | -2.56 |
| IPI00384542 | Isoform 2 of Nidogen-1 precursor                                      | R.AECLNPSQPSR.R                        | 2 | 3.02 | 0.24 | -1.38 |
| IPI00384542 | Isoform 2 of Nidogen-1 precursor                                      | R.ASLHGGEPTTIIRQDLGSPEGIAVDHLGR.N      | 4 | 5.50 | 0.51 | -3.12 |
| IPI00384542 | Isoform 2 of Nidogen-1 precursor                                      | R.EDLSPSITQR.A                         | 2 | 2.89 | 0.22 | -3.61 |
| IPI00384542 | Isoform 2 of Nidogen-1 precursor                                      | R.EYTVTEPER.D                          | 2 | 2.29 | 0.27 | -2.63 |
| IPI00384542 | Isoform 2 of Nidogen-1 precursor                                      | R.EYTVTEPERDGASPSR.I                   | 3 | 2.35 | 0.12 | -1.10 |
| IPI00384542 | Isoform 2 of Nidogen-1 precursor                                      | R.FYDRSDIDAVYVTTNGIATSEPPAK.E          | 3 | 3.17 | 0.33 | 0.39  |
| IPI00384542 | Isoform 2 of Nidogen-1 precursor                                      | R.GFPEISFQPSSAVVVTWESVAPYQGSPRDPDQK.G  | 3 | 3.34 | 0.24 | -5.37 |
| IPI00384542 | Isoform 2 of Nidogen-1 precursor                                      | R.GFPEISFQPSSAVVVTWESVAPYQGSPRDPDQK.G  | 4 | 3.34 | 0.11 | -6.30 |
| IPI00384542 | Isoform 2 of Nidogen-1 precursor                                      | R.GGADTYSVPSVLSPR.R                    | 2 | 2.56 | 0.13 | -1.97 |
| IPI00384542 | Isoform 2 of Nidogen-1 precursor                                      | R.GIVTDSVR.G                           | 2 | 2.14 | 0.17 | -2.13 |
| IPI00384542 | Isoform 2 of Nidogen-1 precursor                                      | R.GNLVWTDWNR.D                         | 2 | 2.70 | 0.29 | -1.23 |
| IPI00384542 | Isoform 2 of Nidogen-1 precursor                                      | R.IFVGSSQVPIVFENTDLHSYVVM*NHGR.S       | 4 | 2.55 | 0.11 | -3.84 |
| IPI00384542 | Isoform 2 of Nidogen-1 precursor                                      | R.KALEGLQYPPAVTSYK.N                   | 2 | 5.18 | 0.53 | -4.19 |
| IPI00384542 | Isoform 2 of Nidogen-1 precursor                                      | R.QAEVTFVGHGPNLVK.Q                    | 3 | 2.13 | 0.14 | -2.55 |
| IPI00384542 | Isoform 2 of Nidogen-1 precursor                                      | R.QDLGSPEGIAVDHLGR.N                   | 2 | 2.67 | 0.30 | -2.05 |
| IPI00384542 | Isoform 2 of Nidogen-1 precursor                                      | R.QDLGSPEGIAVDHLGR.N                   | 3 | 2.23 | 0.16 | -0.35 |
| IPI00384542 | Isoform 2 of Nidogen-1 precursor                                      | R.QELFFPGPGQGDELEDGDDFVSPAELSGALR.F    | 2 | 2.13 | 0.37 | -2.51 |
| IPI00384542 | Isoform 2 of Nidogen-1 precursor                                      | R.QELFFPGPGQGDELEDGDDFVSPAELSGALR.F    | 3 | 5.66 | 0.49 | -3.14 |
| IPI00384542 | Isoform 2 of Nidogen-1 precursor                                      | R.QELFFPGPGQGDELEDGDDFVSPAELSGALR.F    | 4 | 4.02 | 0.39 | -2.68 |
| IPI00384542 | Isoform 2 of Nidogen-1 precursor                                      | R.RGGADTYSVPSVLSPR.R                   | 2 | 3.25 | 0.32 | -3.12 |
| IPI00384542 | Isoform 2 of Nidogen-1 precursor                                      | R.RVLFETDLVNPR.G                       | 2 | 3.12 | 0.35 | -4.36 |
| IPI00384542 | Isoform 2 of Nidogen-1 precursor                                      | R.RVLFETDLVNPR.G                       | 3 | 2.48 | 0.21 | -2.61 |
| IPI00384542 | Isoform 2 of Nidogen-1 precursor                                      | R.SDIDAVYVTTNGIATSEPPAK.E              | 3 | 3.28 | 0.06 | 0.46  |
| IPI00384542 | Isoform 2 of Nidogen-1 precursor                                      | R.SFQLAVETFHQH.H                       | 2 | 3.81 | 0.33 | -5.92 |
| IPI00384542 | Isoform 2 of Nidogen-1 precursor                                      | R.TQFTCECSIGFR.G                       | 2 | 3.78 | 0.43 | -3.06 |

|             |                                      |                                      |   |      |      |       |
|-------------|--------------------------------------|--------------------------------------|---|------|------|-------|
| IPI00384542 | Isoform 2 of Nidogen-1 precursor     | R.VLFETDLVNP.R.G                     | 2 | 2.97 | 0.39 | -3.10 |
| IPI00384542 | Isoform 2 of Nidogen-1 precursor     | R.VPQIPFGSSVHIEPYTELYHYSTSVITSSSTR.E | 4 | 2.86 | 0.17 | -2.70 |
| IPI00384697 | Isoform 2 of Serum albumin precursor | A.DLPSLAADFVESKDVCK.N                | 1 | 3.67 | 0.21 |       |
| IPI00384697 | Isoform 2 of Serum albumin precursor | A.DLPSLAADFVESKDVCK.N                | 2 | 5.26 | 0.48 |       |
| IPI00384697 | Isoform 2 of Serum albumin precursor | A.KVFDEFKPLVEEPQNLK.Q                | 3 | 6.62 | 0.37 |       |
| IPI00384697 | Isoform 2 of Serum albumin precursor | C.FSALEVDETYVPK.E                    | 2 | 4.90 | 0.32 |       |
| IPI00384697 | Isoform 2 of Serum albumin precursor | C.FSALEVDETYVPKFNAETFFHADICTLSEK.E   | 3 | 6.45 | 0.49 |       |
| IPI00384697 | Isoform 2 of Serum albumin precursor | C.FSALEVDETYVPKFNAETFFHADICTLSEKER.Q | 3 | 6.06 | 0.42 |       |
| IPI00384697 | Isoform 2 of Serum albumin precursor | C.IAEVENDEM*PADLPSLAADFVESK.D        | 2 | 5.54 | 0.49 |       |
| IPI00384697 | Isoform 2 of Serum albumin precursor | D.LPSLAADFVESKDVCK.N                 | 1 | 4.13 | 0.38 |       |
| IPI00384697 | Isoform 2 of Serum albumin precursor | D.VFLGM*FLYEYAR.R                    | 2 | 3.66 | 0.43 | -4.13 |
| IPI00384697 | Isoform 2 of Serum albumin precursor | E.FAEVSKLVDTLTK.V                    | 2 | 4.99 | 0.38 |       |
| IPI00384697 | Isoform 2 of Serum albumin precursor | E.MPADLPSLAADFVESK.D                 | 1 | 4.14 | 0.34 |       |
| IPI00384697 | Isoform 2 of Serum albumin precursor | E.PQNLKQNCLEFELGQYK.F                | 2 | 5.83 | 0.50 |       |
| IPI00384697 | Isoform 2 of Serum albumin precursor | E.PQNLKQNCLEFELGQYKFNALLVR.Y         | 3 | 7.04 | 0.46 |       |
| IPI00384697 | Isoform 2 of Serum albumin precursor | E.TFTFHADICTLSEKER.Q                 | 2 | 4.95 | 0.39 |       |
| IPI00384697 | Isoform 2 of Serum albumin precursor | E.VENDEM*PADLPSLAADFVESK.D           | 2 | 5.73 | 0.50 |       |
| IPI00384697 | Isoform 2 of Serum albumin precursor | H.CIAEVENDEM*PADLPSLAADFVESKDVCK.N   | 3 | 5.79 | 0.36 |       |
| IPI00384697 | Isoform 2 of Serum albumin precursor | K.ADDKETCFAEEGKK.L                   | 3 | 4.64 | 0.28 |       |
| IPI00384697 | Isoform 2 of Serum albumin precursor | K.ADDKETCFAEEGKKVAASQAALGL.-         | 3 | 4.07 | 0.24 |       |
| IPI00384697 | Isoform 2 of Serum albumin precursor | K.AEFAEVSK.L                         | 1 | 2.70 | 0.11 |       |
| IPI00384697 | Isoform 2 of Serum albumin precursor | K.AEFAEVSK.L                         | 2 | 2.32 | 0.06 | -2.27 |
| IPI00384697 | Isoform 2 of Serum albumin precursor | K.AEFAEVSKLVDTLTK.V                  | 1 | 3.71 | 0.40 |       |
| IPI00384697 | Isoform 2 of Serum albumin precursor | K.AEFAEVSKLVDTLTK.V                  | 2 | 4.59 | 0.44 | -3.50 |
| IPI00384697 | Isoform 2 of Serum albumin precursor | K.AEFAEVSKLVDTLTK.V                  | 3 | 3.57 | 0.24 | -4.12 |
| IPI00384697 | Isoform 2 of Serum albumin precursor | K.ATKEQLKAVM*DDFAAFVEK.C             | 2 | 6.27 | 0.48 |       |
| IPI00384697 | Isoform 2 of Serum albumin precursor | K.ATKEQLKAVM*DDFAAFVEK.C             | 3 | 5.05 | 0.42 |       |
| IPI00384697 | Isoform 2 of Serum albumin precursor | K.ATKEQLKAVMDDFAAFVEK.C              | 2 | 6.09 | 0.52 |       |
| IPI00384697 | Isoform 2 of Serum albumin precursor | K.ATKEQLKAVMDDFAAFVEK.C              | 3 | 4.63 | 0.36 |       |
| IPI00384697 | Isoform 2 of Serum albumin precursor | K.AVM*DDFAAFVEK.C                    | 1 | 3.46 | 0.41 |       |
| IPI00384697 | Isoform 2 of Serum albumin precursor | K.AVM*DDFAAFVEK.C                    | 2 | 2.72 | 0.20 | -4.62 |
| IPI00384697 | Isoform 2 of Serum albumin precursor | K.AVM*DDFAAFVEK.C                    | 3 | 4.27 | 0.17 |       |
| IPI00384697 | Isoform 2 of Serum albumin precursor | K.AVMDDFAAFVEK.C                     | 1 | 3.38 | 0.39 |       |
| IPI00384697 | Isoform 2 of Serum albumin precursor | K.AVMDDFAAFVEK.C                     | 2 | 4.72 | 0.45 |       |
| IPI00384697 | Isoform 2 of Serum albumin precursor | K.AVMDDFAAFVEK.C                     | 3 | 4.80 | 0.31 |       |
| IPI00384697 | Isoform 2 of Serum albumin precursor | K.AVMDDFAAFVEKCK.A                   | 2 | 3.36 | 0.24 |       |
| IPI00384697 | Isoform 2 of Serum albumin precursor | K.CCAAADPHECYAK.V                    | 1 | 3.25 | 0.49 |       |
| IPI00384697 | Isoform 2 of Serum albumin precursor | K.CCAAADPHECYAK.V                    | 2 | 5.15 | 0.46 |       |
| IPI00384697 | Isoform 2 of Serum albumin precursor | K.CCAAADPHECYAKVFDEFKPLVEEPQNLK.Q    | 3 | 5.66 | 0.38 |       |
| IPI00384697 | Isoform 2 of Serum albumin precursor | K.CCTESLVNR.R                        | 1 | 3.26 | 0.42 |       |
| IPI00384697 | Isoform 2 of Serum albumin precursor | K.CCTESLVNR.R                        | 2 | 3.78 | 0.39 |       |
| IPI00384697 | Isoform 2 of Serum albumin precursor | K.CCTESLVNRRPCFSALEVDETYVPK.E        | 3 | 4.01 | 0.32 |       |

|             |                                      |                                              |   |      |      |       |
|-------------|--------------------------------------|----------------------------------------------|---|------|------|-------|
| IPI00384697 | Isoform 2 of Serum albumin precursor | K.DLGEENFK.A                                 | 1 | 2.48 | 0.19 |       |
| IPI00384697 | Isoform 2 of Serum albumin precursor | K.DLGEENFK.A                                 | 2 | 2.99 | 0.11 |       |
| IPI00384697 | Isoform 2 of Serum albumin precursor | K.DVCKNYAEAK.D                               | 1 | 2.80 | 0.28 |       |
| IPI00384697 | Isoform 2 of Serum albumin precursor | K.DVCKNYAEAK.D                               | 2 | 3.15 | 0.28 |       |
| IPI00384697 | Isoform 2 of Serum albumin precursor | K.DVCKNYAEAK.D                               | 3 | 2.72 | 0.23 |       |
| IPI00384697 | Isoform 2 of Serum albumin precursor | K.DVCKNYAEAKDVFLGM*FLYEYAR.R                 | 2 | 5.81 | 0.52 |       |
| IPI00384697 | Isoform 2 of Serum albumin precursor | K.DVCKNYAEAKDVFLGM*FLYEYAR.R                 | 3 | 6.16 | 0.51 |       |
| IPI00384697 | Isoform 2 of Serum albumin precursor | K.DVCKNYAEAKDVFLGMFLYEYAR.R                  | 2 | 5.40 | 0.53 |       |
| IPI00384697 | Isoform 2 of Serum albumin precursor | K.DVCKNYAEAKDVFLGMFLYEYAR.R                  | 3 | 5.99 | 0.53 |       |
| IPI00384697 | Isoform 2 of Serum albumin precursor | K.DVFLGM*FLYEYAR.R                           | 2 | 3.99 | 0.47 | -5.06 |
| IPI00384697 | Isoform 2 of Serum albumin precursor | K.DVFLGM*FLYEYAR.R                           | 3 | 5.36 | 0.36 |       |
| IPI00384697 | Isoform 2 of Serum albumin precursor | K.DVFLGMFLYEYAR.R                            | 1 | 4.45 | 0.40 |       |
| IPI00384697 | Isoform 2 of Serum albumin precursor | K.DVFLGMFLYEYAR.R                            | 2 | 3.34 | 0.41 | -5.62 |
| IPI00384697 | Isoform 2 of Serum albumin precursor | K.DVFLGMFLYEYAR.R                            | 3 | 4.99 | 0.43 |       |
| IPI00384697 | Isoform 2 of Serum albumin precursor | K.ECCEKPLLEK.S                               | 1 | 2.75 | 0.15 |       |
| IPI00384697 | Isoform 2 of Serum albumin precursor | K.ECCEKPLLEK.S                               | 2 | 2.89 | 0.28 |       |
| IPI00384697 | Isoform 2 of Serum albumin precursor | K.EFNAETFTFHADICTLSEK.E                      | 2 | 6.58 | 0.56 |       |
| IPI00384697 | Isoform 2 of Serum albumin precursor | K.EFNAETFTFHADICTLSEK.E                      | 3 | 3.55 | 0.39 |       |
| IPI00384697 | Isoform 2 of Serum albumin precursor | K.EFNAETFTFHADICTLSEKER.Q                    | 2 | 5.54 | 0.57 |       |
| IPI00384697 | Isoform 2 of Serum albumin precursor | K.EFNAETFTFHADICTLSEKER.Q                    | 3 | 5.35 | 0.42 |       |
| IPI00384697 | Isoform 2 of Serum albumin precursor | K.EQLKAVM*DDFAAFVEK.C                        | 1 | 3.76 | 0.46 |       |
| IPI00384697 | Isoform 2 of Serum albumin precursor | K.EQLKAVM*DDFAAFVEK.C                        | 2 | 5.62 | 0.47 |       |
| IPI00384697 | Isoform 2 of Serum albumin precursor | K.EQLKAVM*DDFAAFVEK.C                        | 3 | 3.90 | 0.30 |       |
| IPI00384697 | Isoform 2 of Serum albumin precursor | K.EQLKAVMDDFAAFVEK.C                         | 1 | 5.01 | 0.49 |       |
| IPI00384697 | Isoform 2 of Serum albumin precursor | K.EQLKAVMDDFAAFVEK.C                         | 2 | 5.14 | 0.48 |       |
| IPI00384697 | Isoform 2 of Serum albumin precursor | K.EQLKAVMDDFAAFVEK.C                         | 3 | 4.60 | 0.44 |       |
| IPI00384697 | Isoform 2 of Serum albumin precursor | K.FQNALLVR.Y                                 | 1 | 1.76 | 0.09 | -1.15 |
| IPI00384697 | Isoform 2 of Serum albumin precursor | K.FQNALLVR.Y                                 | 2 | 3.03 | 0.15 | -2.03 |
| IPI00384697 | Isoform 2 of Serum albumin precursor | K.HKPKATKEQLK.A                              | 3 | 2.92 | 0.14 |       |
| IPI00384697 | Isoform 2 of Serum albumin precursor | K.KLVAASQAALGL.-                             | 1 | 3.00 | 0.31 |       |
| IPI00384697 | Isoform 2 of Serum albumin precursor | K.KLVAASQAALGL.-                             | 2 | 3.69 | 0.36 |       |
| IPI00384697 | Isoform 2 of Serum albumin precursor | K.KQTALVELVK.H                               | 1 | 2.79 | 0.27 |       |
| IPI00384697 | Isoform 2 of Serum albumin precursor | K.KQTALVELVK.H                               | 2 | 3.26 | 0.24 |       |
| IPI00384697 | Isoform 2 of Serum albumin precursor | K.KVPQVSTPTLVEVSR.N                          | 1 | 4.15 | 0.48 |       |
| IPI00384697 | Isoform 2 of Serum albumin precursor | K.KVPQVSTPTLVEVSR.N                          | 2 | 3.59 | 0.45 | -4.27 |
| IPI00384697 | Isoform 2 of Serum albumin precursor | K.KVPQVSTPTLVEVSR.N                          | 3 | 4.86 | 0.49 | -3.58 |
| IPI00384697 | Isoform 2 of Serum albumin precursor | K.KVPQVSTPTLVEVSRNLGK.V                      | 2 | 3.37 | 0.40 |       |
| IPI00384697 | Isoform 2 of Serum albumin precursor | K.KVPQVSTPTLVEVSRNLGK.V                      | 3 | 3.70 | 0.34 |       |
| IPI00384697 | Isoform 2 of Serum albumin precursor | K.LKECCEKPLLEK.S                             | 1 | 3.16 | 0.24 |       |
| IPI00384697 | Isoform 2 of Serum albumin precursor | K.LKECCEKPLLEK.S                             | 2 | 4.46 | 0.29 |       |
| IPI00384697 | Isoform 2 of Serum albumin precursor | K.LKECCEKPLLEK.S                             | 3 | 4.40 | 0.22 |       |
| IPI00384697 | Isoform 2 of Serum albumin precursor | K.LKECCEKPLLEKSHCIAEVENDEM*PADLPSLAADFVESK.D | 3 | 3.46 | 0.15 |       |

|             |                                      |                                             |   |      |      |       |
|-------------|--------------------------------------|---------------------------------------------|---|------|------|-------|
| IPI00384697 | Isoform 2 of Serum albumin precursor | K.LKECCEKPLLEKSHCIAEVENDEMPADLPSLAADFVESK.D | 3 | 3.17 | 0.11 |       |
| IPI00384697 | Isoform 2 of Serum albumin precursor | K.LVAASQAALGL.-                             | 2 | 3.53 | 0.32 | -2.35 |
| IPI00384697 | Isoform 2 of Serum albumin precursor | K.LVTDLTK.V                                 | 1 | 2.20 | 0.11 |       |
| IPI00384697 | Isoform 2 of Serum albumin precursor | K.LVTDLTKVHTECCHGDILLECADDR.A               | 2 | 4.79 | 0.46 |       |
| IPI00384697 | Isoform 2 of Serum albumin precursor | K.LVTDLTKVHTECCHGDILLECADDR.A               | 3 | 7.23 | 0.53 |       |
| IPI00384697 | Isoform 2 of Serum albumin precursor | K.LVTDLTKVHTECCHGDILLECADDRADLAK.Y          | 2 | 4.02 | 0.42 |       |
| IPI00384697 | Isoform 2 of Serum albumin precursor | K.LVTDLTKVHTECCHGDILLECADDRADLAK.Y          | 3 | 5.08 | 0.30 |       |
| IPI00384697 | Isoform 2 of Serum albumin precursor | K.NYAEAKDVFLGM*FLYEYAR.R                    | 2 | 5.71 | 0.54 |       |
| IPI00384697 | Isoform 2 of Serum albumin precursor | K.NYAEAKDVFLGM*FLYEYAR.R                    | 3 | 3.08 | 0.08 | -4.06 |
| IPI00384697 | Isoform 2 of Serum albumin precursor | K.NYAEAKDVFLGMFLYEYAR.R                     | 2 | 5.95 | 0.48 |       |
| IPI00384697 | Isoform 2 of Serum albumin precursor | K.NYAEAKDVFLGMFLYEYAR.R                     | 3 | 4.91 | 0.36 |       |
| IPI00384697 | Isoform 2 of Serum albumin precursor | K.QNCELFEQLGEYK.F                           | 1 | 3.85 | 0.33 |       |
| IPI00384697 | Isoform 2 of Serum albumin precursor | K.QNCELFEQLGEYK.F                           | 2 | 3.52 | 0.44 | -2.05 |
| IPI00384697 | Isoform 2 of Serum albumin precursor | K.QNCELFEQLGEYK.F                           | 3 | 4.54 | 0.25 |       |
| IPI00384697 | Isoform 2 of Serum albumin precursor | K.QNCELFEQLGEYKFNALLVR.Y                    | 2 | 5.42 | 0.38 |       |
| IPI00384697 | Isoform 2 of Serum albumin precursor | K.QNCELFEQLGEYKFNALLVR.Y                    | 3 | 6.95 | 0.48 |       |
| IPI00384697 | Isoform 2 of Serum albumin precursor | K.QTALVELVK.H                               | 1 | 1.96 | 0.13 |       |
| IPI00384697 | Isoform 2 of Serum albumin precursor | K.QTALVELVK.H                               | 2 | 1.80 | 0.10 | -1.82 |
| IPI00384697 | Isoform 2 of Serum albumin precursor | K.RM*PCAEDYLSVVLNQLCVLHEK.T                 | 2 | 4.36 | 0.39 |       |
| IPI00384697 | Isoform 2 of Serum albumin precursor | K.RM*PCAEDYLSVVLNQLCVLHEK.T                 | 3 | 7.25 | 0.47 |       |
| IPI00384697 | Isoform 2 of Serum albumin precursor | K.RM*PCAEDYLSVVLNQLCVLHEKTPVSDR.V           | 3 | 4.69 | 0.39 |       |
| IPI00384697 | Isoform 2 of Serum albumin precursor | K.RM*PCAEDYLSVVLNQLCVLHEKTPVSDRVTK.C        | 3 | 4.04 | 0.28 |       |
| IPI00384697 | Isoform 2 of Serum albumin precursor | K.RMPCAEDYLSVVLNQLCVLHEK.T                  | 2 | 5.25 | 0.45 |       |
| IPI00384697 | Isoform 2 of Serum albumin precursor | K.RMPCAEDYLSVVLNQLCVLHEK.T                  | 3 | 6.52 | 0.47 |       |
| IPI00384697 | Isoform 2 of Serum albumin precursor | K.RMPCAEDYLSVVLNQLCVLHEKTPVSDR.V            | 3 | 5.15 | 0.32 |       |
| IPI00384697 | Isoform 2 of Serum albumin precursor | K.SHCIAEVENDEM*PAD.L                        | 2 | 5.40 | 0.43 |       |
| IPI00384697 | Isoform 2 of Serum albumin precursor | K.SHCIAEVENDEM*PADLPSLAADFVESK.D            | 2 | 6.10 | 0.55 |       |
| IPI00384697 | Isoform 2 of Serum albumin precursor | K.SHCIAEVENDEM*PADLPSLAADFVESK.D            | 3 | 6.12 | 0.57 | -4.57 |
| IPI00384697 | Isoform 2 of Serum albumin precursor | K.SHCIAEVENDEM*PADLPSLAADFVESKD.V           | 3 | 5.94 | 0.29 |       |
| IPI00384697 | Isoform 2 of Serum albumin precursor | K.SHCIAEVENDEM*PADLPSLAADFVESKDVCK.N        | 2 | 5.61 | 0.60 |       |
| IPI00384697 | Isoform 2 of Serum albumin precursor | K.SHCIAEVENDEM*PADLPSLAADFVESKDVCK.N        | 3 | 7.63 | 0.56 |       |
| IPI00384697 | Isoform 2 of Serum albumin precursor | K.SHCIAEVENDEM*PADLPSLAADFVESKDVCKNYAEAK.D  | 3 | 6.65 | 0.57 |       |
| IPI00384697 | Isoform 2 of Serum albumin precursor | K.SHCIAEVENDEMPADLPSLAADFVESK.D             | 2 | 6.14 | 0.54 |       |
| IPI00384697 | Isoform 2 of Serum albumin precursor | K.SHCIAEVENDEMPADLPSLAADFVESK.D             | 3 | 6.62 | 0.53 |       |
| IPI00384697 | Isoform 2 of Serum albumin precursor | K.SHCIAEVENDEMPADLPSLAADFVESKDVCK.N         | 2 | 5.73 | 0.58 |       |
| IPI00384697 | Isoform 2 of Serum albumin precursor | K.SHCIAEVENDEMPADLPSLAADFVESKDVCK.N         | 3 | 7.27 | 0.55 |       |
| IPI00384697 | Isoform 2 of Serum albumin precursor | K.SHCIAEVENDEMPADLPSLAADFVESKDVCKNYAEAK.D   | 3 | 7.14 | 0.51 |       |
| IPI00384697 | Isoform 2 of Serum albumin precursor | K.TPVSDRVTK.C                               | 2 | 2.16 | 0.06 | -2.14 |
| IPI00384697 | Isoform 2 of Serum albumin precursor | K.TPVSDRVTKCCTESLVNR.R                      | 3 | 4.31 | 0.40 |       |
| IPI00384697 | Isoform 2 of Serum albumin precursor | K.TYETTLEK.C                                | 1 | 1.93 | 0.10 |       |
| IPI00384697 | Isoform 2 of Serum albumin precursor | K.TYETTLEK.C                                | 2 | 2.62 | 0.23 |       |
| IPI00384697 | Isoform 2 of Serum albumin precursor | K.TYETTLEKCCAAADPHECYAK.V                   | 2 | 5.25 | 0.50 |       |



|             |                                      |                                            |   |      |      |       |
|-------------|--------------------------------------|--------------------------------------------|---|------|------|-------|
| IPI00384697 | Isoform 2 of Serum albumin precursor | K.TYETTLEKCCAAADPHECYAK.V                  | 3 | 5.13 | 0.32 |       |
| IPI00384697 | Isoform 2 of Serum albumin precursor | K.VFDEFKPLVEEPQNLIK.Q                      | 2 | 4.55 | 0.39 | -5.33 |
| IPI00384697 | Isoform 2 of Serum albumin precursor | K.VFDEFKPLVEEPQNLIK.Q                      | 3 | 4.84 | 0.32 | -4.89 |
| IPI00384697 | Isoform 2 of Serum albumin precursor | K.VFDEFKPLVEEPQNLIKQNCSELFQELGEYK.F        | 3 | 7.59 | 0.48 |       |
| IPI00384697 | Isoform 2 of Serum albumin precursor | K.VFDEFKPLVEEPQNLIKQNCSELFQELGEYKFNALLVR.Y | 3 | 6.11 | 0.54 |       |
| IPI00384697 | Isoform 2 of Serum albumin precursor | K.VHTECCHGDLLCADDR.A                       | 2 | 6.67 | 0.60 |       |
| IPI00384697 | Isoform 2 of Serum albumin precursor | K.VHTECCHGDLLCADDR.A                       | 3 | 5.51 | 0.45 |       |
| IPI00384697 | Isoform 2 of Serum albumin precursor | K.VHTECCHGDLLCADDRADLAK.Y                  | 2 | 5.13 | 0.43 |       |
| IPI00384697 | Isoform 2 of Serum albumin precursor | K.VHTECCHGDLLCADDRADLAK.Y                  | 3 | 6.44 | 0.50 |       |
| IPI00384697 | Isoform 2 of Serum albumin precursor | K.VHTECCHGDLLCADDRADLAKYICENQDSISSK.L      | 3 | 4.92 | 0.43 |       |
| IPI00384697 | Isoform 2 of Serum albumin precursor | K.VPQVSTPTLVEVSR.N                         | 1 | 3.38 | 0.40 |       |
| IPI00384697 | Isoform 2 of Serum albumin precursor | K.VPQVSTPTLVEVSR.N                         | 2 | 3.92 | 0.45 |       |
| IPI00384697 | Isoform 2 of Serum albumin precursor | K.VPQVSTPTLVEVSR.N                         | 3 | 3.70 | 0.29 |       |
| IPI00384697 | Isoform 2 of Serum albumin precursor | K.VPQVSTPTLVEVSRNLGK.V                     | 3 | 2.66 | 0.20 |       |
| IPI00384697 | Isoform 2 of Serum albumin precursor | K.YICENQDSISSK.L                           | 1 | 3.56 | 0.39 |       |
| IPI00384697 | Isoform 2 of Serum albumin precursor | K.YICENQDSISSK.L                           | 2 | 1.96 | 0.16 | -2.00 |
| IPI00384697 | Isoform 2 of Serum albumin precursor | K.YICENQDSISSK.L                           | 3 | 2.98 | 0.10 |       |
| IPI00384697 | Isoform 2 of Serum albumin precursor | K.YICENQDSISSKLE                           | 2 | 4.73 | 0.43 |       |
| IPI00384697 | Isoform 2 of Serum albumin precursor | K.YICENQDSISSKLEKCEKPLLEK.S                | 3 | 5.80 | 0.27 |       |
| IPI00384697 | Isoform 2 of Serum albumin precursor | L.FEQLGEYKFNALLVR.Y                        | 2 | 5.33 | 0.32 |       |
| IPI00384697 | Isoform 2 of Serum albumin precursor | L.IKQNCSELFQELGEYK.F                       | 2 | 4.99 | 0.28 |       |
| IPI00384697 | Isoform 2 of Serum albumin precursor | L.PSLAADFVESKDVCK.N                        | 1 | 4.05 | 0.37 |       |
| IPI00384697 | Isoform 2 of Serum albumin precursor | L.PSLAADFVESKDVCK.N                        | 2 | 5.36 | 0.39 |       |
| IPI00384697 | Isoform 2 of Serum albumin precursor | M.PADLPSLAADFVESK.D                        | 1 | 4.03 | 0.52 |       |
| IPI00384697 | Isoform 2 of Serum albumin precursor | M.PADLPSLAADFVESK.D                        | 2 | 5.47 | 0.47 |       |
| IPI00384697 | Isoform 2 of Serum albumin precursor | M.PADLPSLAADFVESKDVCK.N                    | 2 | 6.02 | 0.51 |       |
| IPI00384697 | Isoform 2 of Serum albumin precursor | M.PCAEDYLSVVLNQLCVLHEK.T                   | 3 | 6.35 | 0.43 |       |
| IPI00384697 | Isoform 2 of Serum albumin precursor | P.CAEDYLSVVLNQLCVLHEK.T                    | 2 | 5.18 | 0.36 |       |
| IPI00384697 | Isoform 2 of Serum albumin precursor | P.CAEDYLSVVLNQLCVLHEK.T                    | 3 | 6.03 | 0.45 |       |
| IPI00384697 | Isoform 2 of Serum albumin precursor | P.CFSALEVDETYVPK.E                         | 2 | 5.56 | 0.47 |       |
| IPI00384697 | Isoform 2 of Serum albumin precursor | R.ADLAKYICENQDSISSK.L                      | 2 | 5.03 | 0.43 |       |
| IPI00384697 | Isoform 2 of Serum albumin precursor | R.DAHKSEVAHR.F                             | 2 | 2.69 | 0.26 |       |
| IPI00384697 | Isoform 2 of Serum albumin precursor | R.FKDLGEENFK.A                             | 1 | 3.27 | 0.31 |       |
| IPI00384697 | Isoform 2 of Serum albumin precursor | R.FKDLGEENFK.A                             | 2 | 3.67 | 0.24 |       |
| IPI00384697 | Isoform 2 of Serum albumin precursor | R.FKDLGEENFK.A                             | 3 | 2.78 | 0.18 | -3.67 |
| IPI00384697 | Isoform 2 of Serum albumin precursor | R.FPKAEFAEVSK.L                            | 1 | 3.28 | 0.29 |       |
| IPI00384697 | Isoform 2 of Serum albumin precursor | R.FPKAEFAEVSK.L                            | 2 | 3.86 | 0.31 |       |
| IPI00384697 | Isoform 2 of Serum albumin precursor | R.FPKAEFAEVSK.L                            | 3 | 4.48 | 0.30 |       |
| IPI00384697 | Isoform 2 of Serum albumin precursor | R.FPKAEFAEVSKLVTDLTK.V                     | 2 | 6.07 | 0.48 |       |
| IPI00384697 | Isoform 2 of Serum albumin precursor | R.FPKAEFAEVSKLVTDLTK.V                     | 3 | 5.52 | 0.39 |       |
| IPI00384697 | Isoform 2 of Serum albumin precursor | R.HPDYSVLLLLR.L                            | 1 | 3.42 | 0.37 |       |
| IPI00384697 | Isoform 2 of Serum albumin precursor | R.HPDYSVLLLLR.L                            | 2 | 2.94 | 0.36 |       |

|             |                                                            |                                                 |   |      |      |       |
|-------------|------------------------------------------------------------|-------------------------------------------------|---|------|------|-------|
| IPI00384697 | Isoform 2 of Serum albumin precursor                       | R.HPDYSVLLLLR.L                                 | 3 | 4.45 | 0.12 |       |
| IPI00384697 | Isoform 2 of Serum albumin precursor                       | R.LAKTYETTLEK.C                                 | 1 | 2.80 | 0.23 |       |
| IPI00384697 | Isoform 2 of Serum albumin precursor                       | R.LAKTYETTLEK.C                                 | 2 | 3.39 | 0.31 |       |
| IPI00384697 | Isoform 2 of Serum albumin precursor                       | R.LAKTYETTLEK.C                                 | 3 | 2.39 | 0.11 | 1.05  |
| IPI00384697 | Isoform 2 of Serum albumin precursor                       | R.LAKTYETTLEKCCAAADPHECYAK.V                    | 3 | 5.45 | 0.35 |       |
| IPI00384697 | Isoform 2 of Serum albumin precursor                       | R.LSQRFPKAEFAEVSK.L                             | 2 | 3.95 | 0.32 |       |
| IPI00384697 | Isoform 2 of Serum albumin precursor                       | R.LSQRFPKAEFAEVSK.L                             | 3 | 5.85 | 0.39 |       |
| IPI00384697 | Isoform 2 of Serum albumin precursor                       | R.LSQRFPKAEFAEVSKLVTDLTK.V                      | 3 | 7.14 | 0.47 |       |
| IPI00384697 | Isoform 2 of Serum albumin precursor                       | R.M*PCAEDYLSVVLNQLCVLHEK.T                      | 2 | 5.36 | 0.46 |       |
| IPI00384697 | Isoform 2 of Serum albumin precursor                       | R.M*PCAEDYLSVVLNQLCVLHEK.T                      | 3 | 4.25 | 0.37 | -4.98 |
| IPI00384697 | Isoform 2 of Serum albumin precursor                       | R.M*PCAEDYLSVVLNQLCVLHEKTPVSDR.V                | 3 | 5.69 | 0.42 |       |
| IPI00384697 | Isoform 2 of Serum albumin precursor                       | R.M*PCAEDYLSVVLNQLCVLHEKTPVSDRVTK.C             | 3 | 5.84 | 0.48 |       |
| IPI00384697 | Isoform 2 of Serum albumin precursor                       | R.MPCAEDYLSVVLNQLCVLHEK.T                       | 2 | 5.15 | 0.43 |       |
| IPI00384697 | Isoform 2 of Serum albumin precursor                       | R.MPCAEDYLSVVLNQLCVLHEK.T                       | 3 | 4.21 | 0.43 | -4.61 |
| IPI00384697 | Isoform 2 of Serum albumin precursor                       | R.MPCAEDYLSVVLNQLCVLHEKTPVSDR.V                 | 3 | 6.18 | 0.50 |       |
| IPI00384697 | Isoform 2 of Serum albumin precursor                       | R.MPCAEDYLSVVLNQLCVLHEKTPVSDRVTK.C              | 3 | 5.28 | 0.39 |       |
| IPI00384697 | Isoform 2 of Serum albumin precursor                       | R.PCFSALEVDETYVPK.E                             | 2 | 5.95 | 0.49 |       |
| IPI00384697 | Isoform 2 of Serum albumin precursor                       | R.QIKKQATALVELVK.H                              | 3 | 2.90 | 0.25 |       |
| IPI00384697 | Isoform 2 of Serum albumin precursor                       | R.RHPDYSVLLLLR.L                                | 2 | 3.78 | 0.40 |       |
| IPI00384697 | Isoform 2 of Serum albumin precursor                       | R.RHPDYSVLLLLR.L                                | 3 | 5.46 | 0.33 |       |
| IPI00384697 | Isoform 2 of Serum albumin precursor                       | R.RPCFSALEVDETYVPK.E                            | 1 | 3.97 | 0.49 |       |
| IPI00384697 | Isoform 2 of Serum albumin precursor                       | R.RPCFSALEVDETYVPK.E                            | 2 | 4.52 | 0.40 |       |
| IPI00384697 | Isoform 2 of Serum albumin precursor                       | R.RPCFSALEVDETYVPK.E                            | 3 | 3.79 | 0.26 |       |
| IPI00384697 | Isoform 2 of Serum albumin precursor                       | R.RPCFSALEVDETYVPKEFNAETFTFHADICTLSEK.E         | 3 | 6.83 | 0.48 |       |
| IPI00384697 | Isoform 2 of Serum albumin precursor                       | R.RPCFSALEVDETYVPKEFNAETFTFHADICTLSEKER.Q       | 3 | 6.05 | 0.47 |       |
| IPI00384697 | Isoform 2 of Serum albumin precursor                       | R.VTKCCTESLVNR.R                                | 3 | 3.44 | 0.17 |       |
| IPI00384697 | Isoform 2 of Serum albumin precursor                       | R.YTKKVPQVSTPTLVEVSR.N                          | 2 | 4.95 | 0.33 |       |
| IPI00384697 | Isoform 2 of Serum albumin precursor                       | R.YTKKVPQVSTPTLVEVSR.N                          | 3 | 4.84 | 0.39 |       |
| IPI00384697 | Isoform 2 of Serum albumin precursor                       | V.FDEFKPLVEEPQNLIKQNCLEFQGEYK.F                 | 3 | 5.61 | 0.34 |       |
| IPI00384697 | Isoform 2 of Serum albumin precursor                       | V.PKEFNAETFTFHADICTLSEK.E                       | 2 | 5.73 | 0.47 |       |
| IPI00384722 | Isoform 2 of UPF0510 protein C19orf63 precursor            | R.LRDVAALNGLYR.V                                | 3 | 2.53 | 0.05 | -3.07 |
| IPI00384861 | Isoform 1 of ARF GTPase-activating protein GIT1            | R.SQSDLDDQHSDYDSVASEDDTDQEPLRSTGATR.S           | 3 | 2.66 | 0.26 | -2.32 |
| IPI00384952 | Putative uncharacterized protein DKFZp686K04218 (Fragment) | K.HYTNPQDVTVPCPVPPPPPCCHPR.L                    | 3 | 5.66 | 0.35 |       |
| IPI00384952 | Putative uncharacterized protein DKFZp686K04218 (Fragment) | K.SAVQGPPER.D                                   | 2 | 2.30 | 0.12 | 0.79  |
| IPI00384952 | Putative uncharacterized protein DKFZp686K04218 (Fragment) | K.SAVQGPPERDLGCYSVSSVLPGCAQPWNHGETFTCTAAHPELK.T | 3 | 3.92 | 0.18 |       |
| IPI00384952 | Putative uncharacterized protein DKFZp686K04218 (Fragment) | K.SGNTFRPEVHLLPPPSEELALNELVTLTCLAR.G            | 2 | 4.32 | 0.41 |       |
| IPI00384952 | Putative uncharacterized protein DKFZp686K04218 (Fragment) | K.SGNTFRPEVHLLPPPSEELALNELVTLTCLAR.G            | 3 | 6.86 | 0.60 |       |

|             |                                                            |                                         |   |      |      |       |
|-------------|------------------------------------------------------------|-----------------------------------------|---|------|------|-------|
| IPI00384952 | Putative uncharacterized protein DKFZp686K04218 (Fragment) | K.YLTWASR.Q                             | 1 | 1.98 | 0.18 |       |
| IPI00384952 | Putative uncharacterized protein DKFZp686K04218 (Fragment) | K.YLTWASR.Q                             | 2 | 1.93 | 0.24 |       |
| IPI00384952 | Putative uncharacterized protein DKFZp686K04218 (Fragment) | Q.EPSQGTTFVAVTSILR.V                    | 2 | 3.82 | 0.43 | -5.84 |
| IPI00384952 | Putative uncharacterized protein DKFZp686K04218 (Fragment) | R.DASGATFTWTPSSGK.S                     | 2 | 4.55 | 0.44 |       |
| IPI00384952 | Putative uncharacterized protein DKFZp686K04218 (Fragment) | R.DLCGCYSVSSVLPGCAQPWNHGETFTCTAAHPELK.T | 3 | 5.72 | 0.26 |       |
| IPI00384952 | Putative uncharacterized protein DKFZp686K04218 (Fragment) | R.EKYLTWASR.Q                           | 1 | 2.49 | 0.27 |       |
| IPI00384952 | Putative uncharacterized protein DKFZp686K04218 (Fragment) | R.GFSPKDVLR.W                           | 2 | 2.81 | 0.13 |       |
| IPI00384952 | Putative uncharacterized protein DKFZp686K04218 (Fragment) | R.LSISIDTSKNQFSLR.L                     | 2 | 2.66 | 0.13 |       |
| IPI00384952 | Putative uncharacterized protein DKFZp686K04218 (Fragment) | R.NFPPSQDASGDLYTTSSQLTLPATQCPDGK.S      | 2 | 3.66 | 0.39 |       |
| IPI00384952 | Putative uncharacterized protein DKFZp686K04218 (Fragment) | R.NFPPSQDASGDLYTTSSQLTLPATQCPDGK.S      | 3 | 5.98 | 0.54 |       |
| IPI00384952 | Putative uncharacterized protein DKFZp686K04218 (Fragment) | R.QEPSQGTTFVAVTSILR.V                   | 2 | 4.27 | 0.52 |       |
| IPI00384952 | Putative uncharacterized protein DKFZp686K04218 (Fragment) | R.QEPSQGTTFVAVTSILR.V                   | 3 | 4.05 | 0.27 |       |
| IPI00384952 | Putative uncharacterized protein DKFZp686K04218 (Fragment) | R.VAAEDWK.K                             | 2 | 2.23 | 0.16 |       |
| IPI00384952 | Putative uncharacterized protein DKFZp686K04218 (Fragment) | R.WLQGSQELPR.E                          | 1 | 3.00 | 0.19 |       |
| IPI00384952 | Putative uncharacterized protein DKFZp686K04218 (Fragment) | R.WLQGSQELPR.E                          | 2 | 3.80 | 0.33 |       |
| IPI00384952 | Putative uncharacterized protein DKFZp686K04218 (Fragment) | R.WLQGSQELPREK.Y                        | 2 | 2.71 | 0.15 |       |
| IPI00385003 | Putative transposase                                       | K.AIAAIDSDSSDGSQSKLTFWKGFTILDAIK.N      | 3 | 2.43 | 0.10 | 0.36  |
| IPI00385007 | Putative uncharacterized protein DKFZp686A01208            | K.DIPNEAQFQIR.D                         | 2 | 3.75 | 0.30 | -4.40 |
| IPI00385007 | Putative uncharacterized protein DKFZp686A01208            | K.LQSSNIFTVAK.R                         | 2 | 2.10 | 0.12 | -3.05 |
| IPI00385007 | Putative uncharacterized protein DKFZp686A01208            | K.M*EPLNNLQVAVK.N                       | 2 | 3.13 | 0.30 | -3.02 |
| IPI00385007 | Putative uncharacterized protein DKFZp686A01208            | K.RNVEGQDM*LYQSLK.L                     | 3 | 2.64 | 0.29 | -1.14 |
| IPI00385007 | Putative uncharacterized protein DKFZp686A01208            | R.NVEGQDM*LYQSLK.L                      | 2 | 3.99 | 0.46 | -3.71 |

|             |                                                                                         |                                     |   |      |      |       |
|-------------|-----------------------------------------------------------------------------------------|-------------------------------------|---|------|------|-------|
| IPI00385042 | Nucleolar GTP-binding protein 1                                                         | K.KAKTMMKNAQK.K                     | 3 | 3.61 | 0.06 |       |
| IPI00385143 | Microfibrillar protein 2 (Fragment)                                                     | K.LLIYWASTR.E                       | 2 | 2.79 | 0.24 |       |
| IPI00385252 | Ig kappa chain V-III region GOL                                                         | G.EIVLTQSPGTLSPGER.A                | 2 | 6.33 | 0.22 |       |
| IPI00385252 | Ig kappa chain V-III region GOL                                                         | R.ATGIPDRFSGSGTDFLTISR.L            | 2 | 4.84 | 0.38 |       |
| IPI00385252 | Ig kappa chain V-III region GOL                                                         | R.ATGIPDRFSGSGTDFLTISR.L            | 3 | 3.97 | 0.23 |       |
| IPI00385252 | Ig kappa chain V-III region GOL                                                         | R.FSGSGTDFLTISR.L                   | 1 | 2.55 | 0.22 |       |
| IPI00385252 | Ig kappa chain V-III region GOL                                                         | R.FSGSGTDFLTISR.L                   | 2 | 4.49 | 0.53 |       |
| IPI00385253 | Ig kappa chain V-III region CLL precursor                                               | -.EIVM* <i>TQSPATLSVSPGER.A</i>     | 2 | 4.01 | 0.28 |       |
| IPI00385253 | Ig kappa chain V-III region CLL precursor                                               | -.EIVM* <i>TQSPATLSVSPGER.A</i>     | 3 | 3.27 | 0.20 |       |
| IPI00385253 | Ig kappa chain V-III region CLL precursor                                               | -.EIVMTQSPATLSVSPGER.A              | 2 | 4.41 | 0.23 |       |
| IPI00385253 | Ig kappa chain V-III region CLL precursor                                               | -.EIVMTQSPATLSVSPGER.A              | 3 | 4.58 | 0.17 |       |
| IPI00385253 | Ig kappa chain V-III region CLL precursor                                               | R.LLIYGASTR.A                       | 2 | 3.10 | 0.20 |       |
| IPI00385264 | Ig mu heavy chain disease protein                                                       | H.SILTVSEEWNTGETYTCVVAHEALPNR.V     | 3 | 4.14 | 0.42 | -3.93 |
| IPI00385264 | Ig mu heavy chain disease protein                                                       | K.GVALHRPDVYLLPPAR.E                | 2 | 4.14 | 0.31 |       |
| IPI00385264 | Ig mu heavy chain disease protein                                                       | K.GVALHRPDVYLLPPAR.E                | 3 | 4.42 | 0.26 |       |
| IPI00385264 | Ig mu heavy chain disease protein                                                       | K.LICQATGFSPR.Q                     | 2 | 3.30 | 0.34 |       |
| IPI00385264 | Ig mu heavy chain disease protein                                                       | K.QVSGSVTTDEVEAEK.E                 | 2 | 4.83 | 0.45 |       |
| IPI00385264 | Ig mu heavy chain disease protein                                                       | K.SKLICQATGFSPR.Q                   | 2 | 3.95 | 0.38 |       |
| IPI00385264 | Ig mu heavy chain disease protein                                                       | K.SKLICQATGFSPR.Q                   | 3 | 3.47 | 0.30 |       |
| IPI00385264 | Ig mu heavy chain disease protein                                                       | K.VSVFVPPRDGFFGNPR.K                | 3 | 2.70 | 0.22 |       |
| IPI00385264 | Ig mu heavy chain disease protein                                                       | K.YVTSAPM*PEPQAPGR.Y                | 2 | 3.06 | 0.40 | -4.52 |
| IPI00385264 | Ig mu heavy chain disease protein                                                       | K.YVTSAPMPEPQAPGR.Y                 | 2 | 3.15 | 0.35 |       |
| IPI00385264 | Ig mu heavy chain disease protein                                                       | R.DGFFGNPR.K                        | 2 | 2.88 | 0.34 | -3.78 |
| IPI00385264 | Ig mu heavy chain disease protein                                                       | R.FTCTVTHDLPSPK.Q                   | 2 | 4.47 | 0.36 |       |
| IPI00385264 | Ig mu heavy chain disease protein                                                       | R.FTCTVTHDLPSPK.Q                   | 3 | 3.66 | 0.36 |       |
| IPI00385264 | Ig mu heavy chain disease protein                                                       | R.GQPLSPEKYVTSAPM*PEPQAPGR.Y        | 2 | 3.82 | 0.40 |       |
| IPI00385264 | Ig mu heavy chain disease protein                                                       | R.TVDKSTGKPTLYNVSLVM*SDTAGTC.Y      | 3 | 5.71 | 0.42 |       |
| IPI00385264 | Ig mu heavy chain disease protein                                                       | R.TVDKSTGKPTLYNVSLVMSDTAGTCY.-      | 3 | 4.75 | 0.35 |       |
| IPI00385264 | Ig mu heavy chain disease protein                                                       | R.VFAIPPSFASIFLTK.S                 | 2 | 2.74 | 0.19 | -4.97 |
| IPI00385264 | Ig mu heavy chain disease protein                                                       | R.VFAIPPSFASIFLTK.S                 | 3 | 4.22 | 0.32 |       |
| IPI00385264 | Ig mu heavy chain disease protein                                                       | R.YFAHSILTVSEEWNTGETYTCVVAHEALPNR.V | 3 | 6.30 | 0.58 | -4.67 |
| IPI00385264 | Ig mu heavy chain disease protein                                                       | R.YFAHSILTVSEEWNTGETYTCVVAHEALPNR.V | 4 | 3.78 | 0.24 | -4.51 |
| IPI00385480 | Caskin-1                                                                                | K.SIAAMLELSSIGGGGR.A                | 2 | 2.79 | 0.12 | -4.59 |
| IPI00385543 | Isoform 3 of UPF0469 protein KIAA0907                                                   | K.GLTSNKS.K                         | 2 | 2.23 | 0.09 | -8.09 |
| IPI00385791 | Serologically defined breast cancer antigen NY-BR-87 (Fragment)                         | R.ARPQDQGV.V                        | 1 | 1.55 | 0.12 | -7.22 |
| IPI00385918 | CDNA FLJ90582 fis, clone PLACE1000442, moderately similar to ZINC FINGER PROTEIN ZFP-36 | R.NPM*IVSNVGKPSVVPVRFENMK.E         | 2 | 2.94 | 0.09 |       |
| IPI00385980 | ROBO2 isoform a                                                                         | K.EGSQNLLFPNQPPNSR.C                | 2 | 3.40 | 0.32 | -3.59 |
| IPI00385980 | ROBO2 isoform a                                                                         | K.GNPQPAVFWQK.E                     | 2 | 2.89 | 0.31 | -3.28 |
| IPI00385980 | ROBO2 isoform a                                                                         | K.TM*STDEGTYM* <i>CAENR.V</i>       | 2 | 4.69 | 0.57 | -4.09 |

|             |                                                                                                  |                               |   |      |      |       |
|-------------|--------------------------------------------------------------------------------------------------|-------------------------------|---|------|------|-------|
| IPI00385980 | ROBO2 isoform a                                                                                  | R.CQVQGDQPQTVR.W              | 2 | 3.45 | 0.21 | -1.37 |
| IPI00385980 | ROBO2 isoform a                                                                                  | R.CSVSPTGDLTITNIQR.S          | 2 | 4.13 | 0.35 | -3.27 |
| IPI00385980 | ROBO2 isoform a                                                                                  | R.DSDPAELTVFERPTFLR.R         | 3 | 2.83 | 0.23 | -4.40 |
| IPI00385980 | ROBO2 isoform a                                                                                  | R.GRYDIKDDYTLR.I              | 2 | 2.90 | 0.24 | -1.58 |
| IPI00385980 | ROBO2 isoform a                                                                                  | R.LRQEDFPPR.I                 | 2 | 1.74 | 0.08 | -5.77 |
| IPI00385980 | ROBO2 isoform a                                                                                  | R.M*LLPSGSLFFLR.I             | 2 | 3.22 | 0.24 | -3.41 |
| IPI00385980 | ROBO2 isoform a                                                                                  | R.QNPTDVVVAAGEPAILECQPPR.G    | 3 | 4.28 | 0.36 | -4.67 |
| IPI00385980 | ROBO2 isoform a                                                                                  | R.RPINQVVLEEEAVEFR.C          | 2 | 3.58 | 0.35 | -3.87 |
| IPI00385980 | ROBO2 isoform a                                                                                  | R.SDAGYYICQALT VAGSILAK.A     | 2 | 5.02 | 0.50 | -2.13 |
| IPI00385980 | ROBO2 isoform a                                                                                  | R.SDAGYYICQALT VAGSILAK.A     | 3 | 3.83 | 0.36 | -1.85 |
| IPI00385980 | ROBO2 isoform a                                                                                  | R.SVIIGGLFPGIQYR.V            | 2 | 4.12 | 0.46 | -3.67 |
| IPI00385980 | ROBO2 isoform a                                                                                  | R.YDIKDDYTLR.I                | 3 | 2.35 | 0.20 | -1.85 |
| IPI00385985 | Ig lambda chain V-III region LOI                                                                 | -.YVLTQPPSVSVAPGETAR.L        | 2 | 4.95 | 0.37 |       |
| IPI00385985 | Ig lambda chain V-III region LOI                                                                 | R.FSGNSGNTATLTISR.V           | 1 | 3.22 | 0.40 |       |
| IPI00385985 | Ig lambda chain V-III region LOI                                                                 | R.FSGNSGNTATLTISR.V           | 2 | 4.32 | 0.38 |       |
| IPI00386131 | Ig kappa chain V-III region IARC/BL41 precursor                                                  | R.FSGSGSGTDFTLIISR.L          | 2 | 4.55 | 0.46 |       |
| IPI00386133 | Ig kappa chain V-IV region B17 precursor                                                         | G.DIVM*TQSPDSLAVSLGER.A       | 2 | 5.76 | 0.42 |       |
| IPI00386133 | Ig kappa chain V-IV region B17 precursor                                                         | K.LLIYWASTR.E                 | 2 | 2.79 | 0.24 |       |
| IPI00386133 | Ig kappa chain V-IV region B17 precursor                                                         | K.NYLAWYQQKPGQPPK.L           | 3 | 2.60 | 0.33 |       |
| IPI00386133 | Ig kappa chain V-IV region B17 precursor                                                         | K.SSQSILYSSDNK.N              | 2 | 2.71 | 0.12 |       |
| IPI00386133 | Ig kappa chain V-IV region B17 precursor                                                         | Y.GDIVM*TQSPDSLAVSLGER.A      | 2 | 5.69 | 0.50 |       |
| IPI00386284 | olfactory receptor, family 2, subfamily AK, member 2                                             | K.EVTGAVR.R                   | 1 | 1.68 | 0.05 | -1.15 |
| IPI00386314 | FLJ00064 protein (Fragment)                                                                      | K.TGQEIPVNVF.F                | 2 | 2.28 | 0.18 | -1.12 |
| IPI00386393 | CDNA FLJ13729 fis, clone PLACE3000121, weakly similar to VESICULAR TRAFFIC CONTROL PROTEIN SEC15 | K.M*KDTSRKNMFAQFR.K           | 2 | 2.19 | 0.17 | -2.54 |
| IPI00386575 | Ig lambda chain V-I region EPS                                                                   | R.VSISCSGSSSNIGK.N            | 2 | 3.58 | 0.34 |       |
| IPI00386576 | Ig lambda chain V-IV region MOL                                                                  | -.YELTQPPSVSVSPGQTATISCSGDK.L | 3 | 3.45 | 0.14 |       |
| IPI00386630 | TCN2 protein                                                                                     | K.DGETIELR.L                  | 2 | 2.33 | 0.07 | -3.04 |
| IPI00386630 | TCN2 protein                                                                                     | K.TYIDLIFPDCLAPR.V            | 2 | 4.10 | 0.51 | -2.03 |
| IPI00386630 | TCN2 protein                                                                                     | R.DPNTPLLQGIADYRPK.D          | 3 | 2.72 | 0.15 | -2.60 |
| IPI00386630 | TCN2 protein                                                                                     | R.LSLEHLNPSIYVGLR.L           | 2 | 3.43 | 0.32 | -1.82 |
| IPI00386630 | TCN2 protein                                                                                     | R.LSLEHLNPSIYVGLR.L           | 3 | 4.65 | 0.26 | -2.36 |
| IPI00386630 | TCN2 protein                                                                                     | R.LSSLQAGTKEDLYLHSLK.L        | 2 | 4.21 | 0.50 | -3.35 |
| IPI00386630 | TCN2 protein                                                                                     | R.LSSLQAGTKEDLYLHSLK.L        | 3 | 2.06 | 0.19 | -1.09 |
| IPI00386630 | TCN2 protein                                                                                     | R.VHDSVVDK.L                  | 2 | 2.51 | 0.22 | -2.75 |
| IPI00386754 | Isoform 2 of Cysteine-rich with EGF-like domain protein 2 precursor                              | K.SEYPDLFEWFCVK.T             | 2 | 3.12 | 0.46 | -3.06 |
| IPI00386879 | CDNA FLJ14473 fis, clone MAMMA1001080, highly similar to Homo sapiens SNC73 protein (SNC73) mRNA | K.GDTFSCMVGHEALPLAFTQK.T      | 2 | 4.19 | 0.19 |       |

|             |                                                                                                  |                                      |   |      |      |       |
|-------------|--------------------------------------------------------------------------------------------------|--------------------------------------|---|------|------|-------|
| IPI00386879 | CDNA FLJ14473 fis, clone MAMMA1001080, highly similar to Homo sapiens SNC73 protein (SNC73) mRNA | K.KGDTFSCM*VGHEALPLAFTQK.T           | 2 | 4.91 | 0.41 |       |
| IPI00386879 | CDNA FLJ14473 fis, clone MAMMA1001080, highly similar to Homo sapiens SNC73 protein (SNC73) mRNA | K.KGDTFSCM*VGHEALPLAFTQK.T           | 3 | 3.90 | 0.44 | -2.10 |
| IPI00386879 | CDNA FLJ14473 fis, clone MAMMA1001080, highly similar to Homo sapiens SNC73 protein (SNC73) mRNA | K.NSLYLQM*NSLR.A                     | 2 | 3.76 | 0.14 |       |
| IPI00386879 | CDNA FLJ14473 fis, clone MAMMA1001080, highly similar to Homo sapiens SNC73 protein (SNC73) mRNA | K.NSLYLQMNSLR.A                      | 1 | 3.55 | 0.11 |       |
| IPI00386879 | CDNA FLJ14473 fis, clone MAMMA1001080, highly similar to Homo sapiens SNC73 protein (SNC73) mRNA | K.NSLYLQMNSLR.A                      | 2 | 4.01 | 0.17 |       |
| IPI00386879 | CDNA FLJ14473 fis, clone MAMMA1001080, highly similar to Homo sapiens SNC73 protein (SNC73) mRNA | K.SAVQGPPER.D                        | 2 | 2.30 | 0.12 | 0.79  |
| IPI00386879 | CDNA FLJ14473 fis, clone MAMMA1001080, highly similar to Homo sapiens SNC73 protein (SNC73) mRNA | K.SAVQGPPERDLGCGYSVSVLPGCAEPWNHGK.T  | 3 | 5.80 | 0.08 |       |
| IPI00386879 | CDNA FLJ14473 fis, clone MAMMA1001080, highly similar to Homo sapiens SNC73 protein (SNC73) mRNA | K.SGNTFRPEVHLLPPPSEELALNELVTLTCLAR.G | 2 | 4.32 | 0.41 |       |
| IPI00386879 | CDNA FLJ14473 fis, clone MAMMA1001080, highly similar to Homo sapiens SNC73 protein (SNC73) mRNA | K.SGNTFRPEVHLLPPPSEELALNELVTLTCLAR.G | 3 | 6.86 | 0.60 |       |
| IPI00386879 | CDNA FLJ14473 fis, clone MAMMA1001080, highly similar to Homo sapiens SNC73 protein (SNC73) mRNA | K.TFTCTAAYPESK.T                     | 1 | 2.27 | 0.26 |       |
| IPI00386879 | CDNA FLJ14473 fis, clone MAMMA1001080, highly similar to Homo sapiens SNC73 protein (SNC73) mRNA | K.TFTCTAAYPESK.T                     | 2 | 4.10 | 0.40 |       |
| IPI00386879 | CDNA FLJ14473 fis, clone MAMMA1001080, highly similar to Homo sapiens SNC73 protein (SNC73) mRNA | K.TFTCTAAYPESKPLTATLSK.S             | 2 | 4.13 | 0.39 |       |
| IPI00386879 | CDNA FLJ14473 fis, clone MAMMA1001080, highly similar to Homo sapiens SNC73 protein (SNC73) mRNA | K.TFTCTAAYPESKPLTATLSK.S             | 3 | 4.01 | 0.44 |       |
| IPI00386879 | CDNA FLJ14473 fis, clone MAMMA1001080, highly similar to Homo sapiens SNC73 protein (SNC73) mRNA | K.TPLTATLSK.S                        | 1 | 2.18 | 0.20 |       |

|             |                                                                                                  |                                                    |   |      |      |       |
|-------------|--------------------------------------------------------------------------------------------------|----------------------------------------------------|---|------|------|-------|
| IPI00386879 | CDNA FLJ14473 fis, clone MAMMA1001080, highly similar to Homo sapiens SNC73 protein (SNC73) mRNA | K.TPLTATLSK.S                                      | 2 | 2.50 | 0.14 |       |
| IPI00386879 | CDNA FLJ14473 fis, clone MAMMA1001080, highly similar to Homo sapiens SNC73 protein (SNC73) mRNA | K.VFPLSLCSTQPDGNVVIACLQVGGFFPQEPLSVTWSESGQGV.TAR.N | 3 | 3.85 | 0.24 |       |
| IPI00386879 | CDNA FLJ14473 fis, clone MAMMA1001080, highly similar to Homo sapiens SNC73 protein (SNC73) mRNA | K.YLTWASR.Q                                        | 1 | 1.98 | 0.18 |       |
| IPI00386879 | CDNA FLJ14473 fis, clone MAMMA1001080, highly similar to Homo sapiens SNC73 protein (SNC73) mRNA | K.YLTWASR.Q                                        | 2 | 1.93 | 0.24 |       |
| IPI00386879 | CDNA FLJ14473 fis, clone MAMMA1001080, highly similar to Homo sapiens SNC73 protein (SNC73) mRNA | Q.EPSQGTTFFAVTSILR.V                               | 2 | 3.82 | 0.43 | -5.84 |
| IPI00386879 | CDNA FLJ14473 fis, clone MAMMA1001080, highly similar to Homo sapiens SNC73 protein (SNC73) mRNA | R.DASGVFTWTPSSGK.S                                 | 1 | 3.53 | 0.45 |       |
| IPI00386879 | CDNA FLJ14473 fis, clone MAMMA1001080, highly similar to Homo sapiens SNC73 protein (SNC73) mRNA | R.DASGVFTWTPSSGK.S                                 | 2 | 5.30 | 0.49 |       |
| IPI00386879 | CDNA FLJ14473 fis, clone MAMMA1001080, highly similar to Homo sapiens SNC73 protein (SNC73) mRNA | R.DLCGCYSVSSVLPGCAEPWNHGK.T                        | 2 | 4.99 | 0.09 |       |
| IPI00386879 | CDNA FLJ14473 fis, clone MAMMA1001080, highly similar to Homo sapiens SNC73 protein (SNC73) mRNA | R.DLCGCYSVSSVLPGCAEPWNHGK.T                        | 3 | 3.41 | 0.09 |       |
| IPI00386879 | CDNA FLJ14473 fis, clone MAMMA1001080, highly similar to Homo sapiens SNC73 protein (SNC73) mRNA | R.DNAKNSLYLQM*NSLR.A                               | 2 | 4.82 | 0.44 |       |
| IPI00386879 | CDNA FLJ14473 fis, clone MAMMA1001080, highly similar to Homo sapiens SNC73 protein (SNC73) mRNA | R.DNAKNSLYLQM*NSLR.A                               | 3 | 4.39 | 0.37 |       |
| IPI00386879 | CDNA FLJ14473 fis, clone MAMMA1001080, highly similar to Homo sapiens SNC73 protein (SNC73) mRNA | R.EKYLTWASR.Q                                      | 1 | 2.49 | 0.27 |       |
| IPI00386879 | CDNA FLJ14473 fis, clone MAMMA1001080, highly similar to Homo sapiens SNC73 protein (SNC73) mRNA | R.GFSPKDVLR.W                                      | 2 | 2.81 | 0.13 |       |
| IPI00386879 | CDNA FLJ14473 fis, clone MAMMA1001080, highly similar to Homo sapiens SNC73 protein (SNC73) mRNA | R.NFPPSQDASGDLYTTSSQLTLPATQCLAGK.S                 | 2 | 4.34 | 0.48 |       |

|             |                                                                                                  |                                    |   |      |      |       |
|-------------|--------------------------------------------------------------------------------------------------|------------------------------------|---|------|------|-------|
| IPI00386879 | CDNA FLJ14473 fis, clone MAMMA1001080, highly similar to Homo sapiens SNC73 protein (SNC73) mRNA | R.NFPPSQDASGDLYTTSSQLTLPATQCLAGK.S | 3 | 5.77 | 0.57 |       |
| IPI00386879 | CDNA FLJ14473 fis, clone MAMMA1001080, highly similar to Homo sapiens SNC73 protein (SNC73) mRNA | R.QEPSQGTTFVAVTSILR.V              | 2 | 4.27 | 0.52 |       |
| IPI00386879 | CDNA FLJ14473 fis, clone MAMMA1001080, highly similar to Homo sapiens SNC73 protein (SNC73) mRNA | R.QEPSQGTTFVAVTSILR.V              | 3 | 4.05 | 0.27 |       |
| IPI00386879 | CDNA FLJ14473 fis, clone MAMMA1001080, highly similar to Homo sapiens SNC73 protein (SNC73) mRNA | R.VAAEDWK.K                        | 2 | 2.23 | 0.16 |       |
| IPI00386879 | CDNA FLJ14473 fis, clone MAMMA1001080, highly similar to Homo sapiens SNC73 protein (SNC73) mRNA | R.VDDTAVYYCAR.D                    | 2 | 2.27 | 0.15 |       |
| IPI00386879 | CDNA FLJ14473 fis, clone MAMMA1001080, highly similar to Homo sapiens SNC73 protein (SNC73) mRNA | R.WLQGSQELPR.E                     | 1 | 3.00 | 0.19 |       |
| IPI00386879 | CDNA FLJ14473 fis, clone MAMMA1001080, highly similar to Homo sapiens SNC73 protein (SNC73) mRNA | R.WLQGSQELPR.E                     | 2 | 3.80 | 0.33 |       |
| IPI00386879 | CDNA FLJ14473 fis, clone MAMMA1001080, highly similar to Homo sapiens SNC73 protein (SNC73) mRNA | R.WLQGSQELPREK.Y                   | 2 | 2.71 | 0.15 |       |
| IPI00386879 | CDNA FLJ14473 fis, clone MAMMA1001080, highly similar to Homo sapiens SNC73 protein (SNC73) mRNA | W.GQGLTVTVSSASPTSPK.V              | 2 | 5.02 | 0.45 |       |
| IPI00387004 | PNAS-146                                                                                         | R.M*PADHLHCQGRHSHHTQCPLLHPGCR.Q    | 3 | 2.46 | 0.20 | -2.29 |
| IPI00387024 | Ig kappa chain V-I region CAR                                                                    | -.DIQM*TQSPSTLSASVGDR.V            | 2 | 5.72 | 0.23 |       |
| IPI00387024 | Ig kappa chain V-I region CAR                                                                    | -.DIQM*TQSPSTLSASVGDR.V            | 3 | 3.93 | 0.31 |       |
| IPI00387024 | Ig kappa chain V-I region CAR                                                                    | -.DIQMTQSPSTLSASVGDR.V             | 2 | 5.56 | 0.15 |       |
| IPI00387024 | Ig kappa chain V-I region CAR                                                                    | K.VLIYKSSSLESGVPSR.F               | 2 | 3.09 | 0.14 |       |
| IPI00387095 | Ig kappa chain V-I region Ka                                                                     | -.DIQM*TQSPSTLSVSVGDR.V            | 2 | 3.25 | 0.08 |       |
| IPI00387095 | Ig kappa chain V-I region Ka                                                                     | -.DIQM*TQSPSTLSVSVGDR.V            | 3 | 3.37 | 0.19 |       |
| IPI00387096 | Ig kappa chain V-I region Kue                                                                    | K.ASTLETGVPSR.F                    | 2 | 3.00 | 0.37 |       |
| IPI00387097 | Ig kappa chain V-I region Lay                                                                    | -.DIQM*TQSPSSLSVSVGDR.V            | 2 | 5.09 | 0.31 |       |
| IPI00387097 | Ig kappa chain V-I region Lay                                                                    | -.DIQM*TQSPSSLSVSVGDR.V            | 3 | 3.32 | 0.27 |       |
| IPI00387097 | Ig kappa chain V-I region Lay                                                                    | R.LLIYGASTR.A                      | 2 | 3.10 | 0.20 |       |
| IPI00387101 | Ig kappa chain V-I region Scw                                                                    | K.ASTLETGVPSR.F                    | 2 | 3.00 | 0.37 |       |
| IPI00387105 | Ig kappa chain V-I region Mev                                                                    | -.DVQM*TQSPSSLSASVGDR.V            | 2 | 5.41 | 0.28 |       |
| IPI00387105 | Ig kappa chain V-I region Mev                                                                    | -.DVQM*TQSPSSLSASVGDR.V            | 3 | 3.44 | 0.14 |       |
| IPI00387105 | Ig kappa chain V-I region Mev                                                                    | -.DVQMTQSPSSLSASVGDR.V             | 2 | 5.13 | 0.23 |       |



|             |                                                                      |                                                     |   |      |      |       |
|-------------|----------------------------------------------------------------------|-----------------------------------------------------|---|------|------|-------|
| IPI00387105 | Ig kappa chain V-I region Mev                                        | -.DVQMTQSPSSLSASVGDR.V                              | 3 | 2.92 | 0.20 |       |
| IPI00387106 | Ig kappa chain V-I region Ni                                         | -.DIQM* <sup>h</sup> TQSPSSLSATVGDR.V               | 2 | 5.32 | 0.27 |       |
| IPI00387106 | Ig kappa chain V-I region Ni                                         | -.DIQM* <sup>h</sup> TQSPSSLSATVGDR.V               | 3 | 4.06 | 0.34 |       |
| IPI00387106 | Ig kappa chain V-I region Ni                                         | -.DIQMTQSPSSLSATVGDR.V                              | 2 | 5.31 | 0.12 |       |
| IPI00387110 | Ig kappa chain V-II region MIL                                       | -.DIVLTQSPSLPVP <sup>h</sup> TGEPASISCR.S           | 2 | 5.20 | 0.49 |       |
| IPI00387110 | Ig kappa chain V-II region MIL                                       | -.DIVLTQSPSLPVP <sup>h</sup> TGEPASISCR.S           | 3 | 4.06 | 0.36 |       |
| IPI00387113 | Ig kappa chain V-III region B6                                       | R.FSGSGSGADFTLTISR.L                                | 2 | 3.79 | 0.37 |       |
| IPI00387115 | Ig kappa chain V-III region SIE                                      | G.EIVLTQSPGTL <sup>h</sup> SLSPGER.A                | 2 | 6.33 | 0.22 |       |
| IPI00387115 | Ig kappa chain V-III region SIE                                      | R.ATGIPDRFSGSGSGTDFLTISR.L                          | 2 | 4.84 | 0.38 |       |
| IPI00387115 | Ig kappa chain V-III region SIE                                      | R.ATGIPDRFSGSGSGTDFLTISR.L                          | 3 | 3.97 | 0.23 |       |
| IPI00387115 | Ig kappa chain V-III region SIE                                      | R.FSGSGSGTDFLTISR.L                                 | 1 | 2.55 | 0.22 |       |
| IPI00387115 | Ig kappa chain V-III region SIE                                      | R.FSGSGSGTDFLTISR.L                                 | 2 | 4.49 | 0.53 |       |
| IPI00387115 | Ig kappa chain V-III region SIE                                      | R.LLIYGASSR.A                                       | 2 | 3.35 | 0.21 |       |
| IPI00387116 | Ig kappa chain V-III region NG9 precursor (Fragment)                 | G.EIVLTQSPGTL <sup>h</sup> SLSPGER.A                | 2 | 6.33 | 0.22 |       |
| IPI00387116 | Ig kappa chain V-III region NG9 precursor (Fragment)                 | R.ASQSVSSSYLAWYQKPGQAPR.L                           | 2 | 5.52 | 0.40 |       |
| IPI00387116 | Ig kappa chain V-III region NG9 precursor (Fragment)                 | R.ASQSVSSSYLAWYQKPGQAPR.L                           | 3 | 3.59 | 0.29 |       |
| IPI00387116 | Ig kappa chain V-III region NG9 precursor (Fragment)                 | R.FSGSASGTDFLTISR.L                                 | 2 | 3.65 | 0.26 |       |
| IPI00387117 | Ig kappa chain V-III region Ti                                       | G.EIVLTQSPGTL <sup>h</sup> SLSPGER.A                | 2 | 6.33 | 0.22 |       |
| IPI00387117 | Ig kappa chain V-III region Ti                                       | R.ATGIPDRFSGSGSGTDFLTISR.L                          | 2 | 4.84 | 0.38 |       |
| IPI00387117 | Ig kappa chain V-III region Ti                                       | R.ATGIPDRFSGSGSGTDFLTISR.L                          | 3 | 3.97 | 0.23 |       |
| IPI00387117 | Ig kappa chain V-III region Ti                                       | R.FSGSGSGTDFLTISR.L                                 | 1 | 2.55 | 0.22 |       |
| IPI00387117 | Ig kappa chain V-III region Ti                                       | R.FSGSGSGTDFLTISR.L                                 | 2 | 4.49 | 0.53 |       |
| IPI00387118 | Ig kappa chain V-III region WOL                                      | G.EIVLTQSPGTL <sup>h</sup> SLSPGER.A                | 2 | 6.33 | 0.22 |       |
| IPI00387118 | Ig kappa chain V-III region WOL                                      | R.ATGIPDRFSGSGSGTDFLTISR.L                          | 2 | 4.84 | 0.38 |       |
| IPI00387118 | Ig kappa chain V-III region WOL                                      | R.ATGIPDRFSGSGSGTDFLTISR.L                          | 3 | 3.97 | 0.23 |       |
| IPI00387118 | Ig kappa chain V-III region WOL                                      | R.FSGSGSGTDFLTISR.L                                 | 1 | 2.55 | 0.22 |       |
| IPI00387118 | Ig kappa chain V-III region WOL                                      | R.FSGSGSGTDFLTISR.L                                 | 2 | 4.49 | 0.53 |       |
| IPI00387118 | Ig kappa chain V-III region WOL                                      | R.LLIYGASSR.A                                       | 2 | 3.35 | 0.21 |       |
| IPI00387119 | Ig kappa chain V-III region POM                                      | -.EIVM* <sup>h</sup> TQSPVTL <sup>h</sup> SVSPGER.A | 2 | 4.74 | 0.41 |       |
| IPI00387119 | Ig kappa chain V-III region POM                                      | -.EIVMTQSPVTL <sup>h</sup> SVSPGER.A                | 2 | 4.42 | 0.31 |       |
| IPI00387119 | Ig kappa chain V-III region POM                                      | R.LLIYGASTR.A                                       | 2 | 3.10 | 0.20 |       |
| IPI00387120 | Ig kappa chain V-IV region Len                                       | G.DIVM* <sup>h</sup> TQSPDSLAVSLGER.A               | 2 | 5.76 | 0.42 |       |
| IPI00387120 | Ig kappa chain V-IV region Len                                       | K.LLIYWASTR.E                                       | 2 | 2.79 | 0.24 |       |
| IPI00387120 | Ig kappa chain V-IV region Len                                       | K.NYLAWYQKPGQPPK.L                                  | 3 | 2.60 | 0.33 |       |
| IPI00387159 | Isoform 1 of Inhibitor of growth protein 3                           | K.FKM* <sup>h</sup> ELEADNAGITEILERR.S              | 2 | 1.45 | 0.07 | -6.41 |
| IPI00387168 | Isoform 1 of Proprotein convertase subtilisin/kexin type 9 precursor | -.MGTVSSRRSWWPLLLLLLLLLLGPAGAR.A                    | 3 | 3.58 | 0.09 |       |

|             |                                                                      |                                                   |   |      |      |       |
|-------------|----------------------------------------------------------------------|---------------------------------------------------|---|------|------|-------|
| IPI00387168 | Isoform 1 of Proprotein convertase subtilisin/kexin type 9 precursor | K.GTVSGTLIGLEFIR.K                                | 2 | 3.37 | 0.28 | -4.23 |
| IPI00387168 | Isoform 1 of Proprotein convertase subtilisin/kexin type 9 precursor | K.SQLVQPVGPLVLLPLAGGYSR.V                         | 2 | 5.18 | 0.55 | -4.70 |
| IPI00387168 | Isoform 1 of Proprotein convertase subtilisin/kexin type 9 precursor | K.SQLVQPVGPLVLLPLAGGYSR.V                         | 3 | 3.58 | 0.32 | -4.63 |
| IPI00387168 | Isoform 1 of Proprotein convertase subtilisin/kexin type 9 precursor | R.AHNAFGGEGVYAIAR.C                               | 2 | 4.57 | 0.58 | -3.17 |
| IPI00387168 | Isoform 1 of Proprotein convertase subtilisin/kexin type 9 precursor | R.AHNAFGGEGVYAIAR.C                               | 3 | 3.72 | 0.21 | -1.91 |
| IPI00387168 | Isoform 1 of Proprotein convertase subtilisin/kexin type 9 precursor | R.KSQLVQPVGPLVLLPLAGGYSR.V                        | 3 | 3.46 | 0.32 | -5.45 |
| IPI00387168 | Isoform 1 of Proprotein convertase subtilisin/kexin type 9 precursor | R.SEEDGLAEAPEHGTTATFHR.C                          | 3 | 2.74 | 0.37 | -1.97 |
| IPI00387168 | Isoform 1 of Proprotein convertase subtilisin/kexin type 9 precursor | R.SEEDGLAEAPEHGTTATFHR.C                          | 4 | 2.15 | 0.16 | -1.14 |
| IPI00394655 | Isoform 4 of Neurofascin precursor                                   | A.IEIPM*DPSIQNELTQPPTITK.Q                        | 2 | 4.08 | 0.33 | -5.69 |
| IPI00394655 | Isoform 4 of Neurofascin precursor                                   | A.IEIPM*DPSIQNELTQPPTITK.Q                        | 3 | 5.49 | 0.37 | -4.35 |
| IPI00394655 | Isoform 4 of Neurofascin precursor                                   | C.VASTELDQDLAK.A                                  | 2 | 3.06 | 0.26 | -0.59 |
| IPI00394655 | Isoform 4 of Neurofascin precursor                                   | F.RVIAINEVGSSHPSLPSER.Y                           | 3 | 3.81 | 0.34 | -3.64 |
| IPI00394655 | Isoform 4 of Neurofascin precursor                                   | K.AAPYWLDEPKNLILAPGEDGR.L                         | 2 | 4.06 | 0.39 | -3.92 |
| IPI00394655 | Isoform 4 of Neurofascin precursor                                   | K.AKFENFNK.A                                      | 2 | 2.12 | 0.09 | -2.89 |
| IPI00394655 | Isoform 4 of Neurofascin precursor                                   | K.AYLTVLADQATPTNR.L                               | 3 | 3.35 | 0.21 | -2.55 |
| IPI00394655 | Isoform 4 of Neurofascin precursor                                   | K.EDDSLTI FGVAER.D                                | 2 | 4.02 | 0.40 | -4.17 |
| IPI00394655 | Isoform 4 of Neurofascin precursor                                   | K.ENLDPVVVQEGAPLTLQCNPPGLPSPVIFWM*SSSM*EPITQDKR.V | 4 | 3.32 | 0.16 | -7.39 |
| IPI00394655 | Isoform 4 of Neurofascin precursor                                   | K.FGTALSNR.I                                      | 1 | 1.84 | 0.08 | -2.90 |
| IPI00394655 | Isoform 4 of Neurofascin precursor                                   | K.FGTALSNR.I                                      | 2 | 2.29 | 0.20 | -3.34 |
| IPI00394655 | Isoform 4 of Neurofascin precursor                                   | K.GGDLPSDKAK.F                                    | 2 | 2.36 | 0.05 | -1.37 |
| IPI00394655 | Isoform 4 of Neurofascin precursor                                   | K.GRPDRPRDLELTDLAER.S                             | 4 | 3.27 | 0.20 | -2.52 |
| IPI00394655 | Isoform 4 of Neurofascin precursor                                   | K.KEDDSLTI FGVAER.D                               | 3 | 3.42 | 0.15 | 0.13  |
| IPI00394655 | Isoform 4 of Neurofascin precursor                                   | K.LTVSWLKDDEPLYIGNR.M                             | 2 | 5.04 | 0.45 | -3.74 |
| IPI00394655 | Isoform 4 of Neurofascin precursor                                   | K.LTVSWLKDDEPLYIGNR.M                             | 3 | 5.39 | 0.43 | -2.28 |
| IPI00394655 | Isoform 4 of Neurofascin precursor                                   | K.NLILAPGEDGR.L                                   | 1 | 2.33 | 0.21 | -3.04 |
| IPI00394655 | Isoform 4 of Neurofascin precursor                                   | K.NLILAPGEDGR.L                                   | 2 | 2.67 | 0.12 | -2.58 |
| IPI00394655 | Isoform 4 of Neurofascin precursor                                   | K.YPGSVNSAVLR.L                                   | 1 | 2.22 | 0.25 | -3.47 |
| IPI00394655 | Isoform 4 of Neurofascin precursor                                   | K.YPGSVNSAVLR.L                                   | 2 | 3.22 | 0.33 | -1.52 |
| IPI00394655 | Isoform 4 of Neurofascin precursor                                   | R.ANGNPKPTVQWM*VNGEPLQSAPPNPNEVAGDTIIFR.D         | 4 | 3.48 | 0.21 | -3.58 |
| IPI00394655 | Isoform 4 of Neurofascin precursor                                   | R.DLELTDLAER.S                                    | 1 | 2.84 | 0.22 | -4.11 |
| IPI00394655 | Isoform 4 of Neurofascin precursor                                   | R.DLELTDLAER.S                                    | 2 | 3.65 | 0.31 | -4.60 |
| IPI00394655 | Isoform 4 of Neurofascin precursor                                   | R.DNIIIECEAK.G                                    | 2 | 3.39 | 0.28 | -3.81 |
| IPI00394655 | Isoform 4 of Neurofascin precursor                                   | R.DQGSYTCVASTELDQDLAK.A                           | 2 | 7.00 | 0.59 | -3.32 |
| IPI00394655 | Isoform 4 of Neurofascin precursor                                   | R.DQGSYTCVASTELDQDLAK.A                           | 3 | 4.18 | 0.48 | -3.40 |

|             |                                       |                                         |   |      |      |       |
|-------------|---------------------------------------|-----------------------------------------|---|------|------|-------|
| IPI00394655 | Isoform 4 of Neurofascin precursor    | R.EVAGDTIIFR.D                          | 1 | 2.83 | 0.29 | -2.15 |
| IPI00394655 | Isoform 4 of Neurofascin precursor    | R.EVAGDTIIFR.D                          | 2 | 1.94 | 0.11 | -2.47 |
| IPI00394655 | Isoform 4 of Neurofascin precursor    | R.EVAGDTIIFRDTQISSR.A                   | 2 | 2.81 | 0.18 | -1.92 |
| IPI00394655 | Isoform 4 of Neurofascin precursor    | R.EVAGDTIIFRDTQISSR.A                   | 3 | 2.41 | 0.18 | -1.92 |
| IPI00394655 | Isoform 4 of Neurofascin precursor    | R.FHFTHTIQQK.N                          | 2 | 2.80 | 0.30 | -3.01 |
| IPI00394655 | Isoform 4 of Neurofascin precursor    | R.GM*DLLECIASGVPTPDIAWYK.K              | 2 | 4.83 | 0.46 | -4.12 |
| IPI00394655 | Isoform 4 of Neurofascin precursor    | R.GM*DLLECIASGVPTPDIAWYK.K              | 3 | 3.29 | 0.20 | -4.49 |
| IPI00394655 | Isoform 4 of Neurofascin precursor    | R.GM*DLLECIASGVPTPDIAWYK.K              | 2 | 4.30 | 0.53 | -4.31 |
| IPI00394655 | Isoform 4 of Neurofascin precursor    | R.GM*DLLECIASGVPTPDIAWYK.K              | 3 | 4.79 | 0.48 | -4.02 |
| IPI00394655 | Isoform 4 of Neurofascin precursor    | R.GMDLLECIASGVPTPDIAWYK.K               | 3 | 3.52 | 0.35 | -3.68 |
| IPI00394655 | Isoform 4 of Neurofascin precursor    | R.GTTVQLECR.V                           | 2 | 2.51 | 0.19 | -0.97 |
| IPI00394655 | Isoform 4 of Neurofascin precursor    | R.ITNVSEEDSGEYFCLASNK.M                 | 2 | 6.35 | 0.61 | -4.36 |
| IPI00394655 | Isoform 4 of Neurofascin precursor    | R.ITNVSEEDSGEYFCLASNK.M                 | 3 | 3.19 | 0.36 | -2.50 |
| IPI00394655 | Isoform 4 of Neurofascin precursor    | R.IYRM*PEDQVAR.R                        | 3 | 2.81 | 0.18 | -2.90 |
| IPI00394655 | Isoform 4 of Neurofascin precursor    | R.KEDQGIYTCVATNILGK.A                   | 2 | 4.44 | 0.40 | -3.92 |
| IPI00394655 | Isoform 4 of Neurofascin precursor    | R.LDCPFFGSPITLR.W                       | 2 | 3.63 | 0.41 | 0.22  |
| IPI00394655 | Isoform 4 of Neurofascin precursor    | R.LSPYVNYQFR.V                          | 1 | 2.20 | 0.20 | -3.40 |
| IPI00394655 | Isoform 4 of Neurofascin precursor    | R.LSPYVNYQFR.V                          | 2 | 2.96 | 0.44 | -2.72 |
| IPI00394655 | Isoform 4 of Neurofascin precursor    | R.LTWIPGDANNSPITDYVVQFEEDQFQPGVWHDHSK.Y | 4 | 3.11 | 0.25 | -3.67 |
| IPI00394655 | Isoform 4 of Neurofascin precursor    | R.M*KKEDDSLTFGVAER.D                    | 2 | 5.17 | 0.51 | -3.80 |
| IPI00394655 | Isoform 4 of Neurofascin precursor    | R.M*PEDQVAR.R                           | 2 | 2.81 | 0.26 | -2.71 |
| IPI00394655 | Isoform 4 of Neurofascin precursor    | R.SGGRPEEYEGEYQCFAR.N                   | 3 | 3.19 | 0.30 | -1.96 |
| IPI00394655 | Isoform 4 of Neurofascin precursor    | R.SGTLVIDFR.S                           | 1 | 1.61 | 0.06 | -3.58 |
| IPI00394655 | Isoform 4 of Neurofascin precursor    | R.SGTLVIDFR.S                           | 2 | 2.68 | 0.23 | -6.00 |
| IPI00394655 | Isoform 4 of Neurofascin precursor    | R.TPSFM*YPQGTASSQM*VLR.G                | 2 | 4.64 | 0.51 | -3.64 |
| IPI00394655 | Isoform 4 of Neurofascin precursor    | R.TPSFM*YPQGTASSQM*VLR.G                | 3 | 4.23 | 0.37 | -3.47 |
| IPI00394655 | Isoform 4 of Neurofascin precursor    | R.TSGAPPESNPGDVK.G                      | 2 | 2.88 | 0.27 | -2.95 |
| IPI00394655 | Isoform 4 of Neurofascin precursor    | R.TSGAPPESNPGDVKGEGR.K                  | 2 | 4.49 | 0.53 | -3.13 |
| IPI00394655 | Isoform 4 of Neurofascin precursor    | R.TSGAPPESNPGDVKGEGRK.N                 | 2 | 4.02 | 0.50 | -2.22 |
| IPI00394655 | Isoform 4 of Neurofascin precursor    | R.TSGAPPESNPGDVKGEGRK.N                 | 4 | 2.72 | 0.31 | -1.23 |
| IPI00394655 | Isoform 4 of Neurofascin precursor    | R.VIAINEVGSSHPSLPSER.Y                  | 2 | 4.76 | 0.48 | -4.22 |
| IPI00394655 | Isoform 4 of Neurofascin precursor    | R.VIAINEVGSSHPSLPSER.Y                  | 3 | 3.16 | 0.34 | -2.98 |
| IPI00394655 | Isoform 4 of Neurofascin precursor    | R.VQAENDFGKGPEPESVIGYSGEDLPSAPR.R       | 3 | 6.03 | 0.50 | -2.75 |
| IPI00394655 | Isoform 4 of Neurofascin precursor    | R.VQAENDFGKGPEPESVIGYSGEDLPSAPRR.F      | 3 | 4.17 | 0.32 | -3.55 |
| IPI00394655 | Isoform 4 of Neurofascin precursor    | R.VSQGHNGDLYFSNVM*LQDM*QTDYSCNAR.F      | 3 | 7.42 | 0.61 | -3.33 |
| IPI00394655 | Isoform 4 of Neurofascin precursor    | R.YRTSGAPPESNPGDVKGEGR.K                | 3 | 4.48 | 0.39 | -2.89 |
| IPI00394655 | Isoform 4 of Neurofascin precursor    | R.YVVGQTPVYVPEIR.V                      | 2 | 4.79 | 0.42 | -3.80 |
| IPI00394655 | Isoform 4 of Neurofascin precursor    | W.LKDDEPLYIGNR.M                        | 2 | 3.77 | 0.30 | -1.91 |
| IPI00394655 | Isoform 4 of Neurofascin precursor    | W.M*VNGEPLQSAPPNPNR.E                   | 2 | 3.85 | 0.40 | -1.22 |
| IPI00394712 | Granulocyte inhibitory protein        | -.DIVM*TSQPGTSLVSPGER.A                 | 2 | 3.44 | 0.17 |       |
| IPI00394820 | Olfactomedin-like protein 1 precursor | K.SAVGNLALR.V                           | 2 | 1.87 | 0.07 | -2.10 |
| IPI00394870 | Borin precursor                       | K.LAQAPEQPGQEKR.E                       | 2 | 3.17 | 0.42 | -3.01 |

|             |                                                           |                                    |   |      |      |       |
|-------------|-----------------------------------------------------------|------------------------------------|---|------|------|-------|
| IPI00394870 | Brorin precursor                                          | K.LAQAPEQPGQEKR.E                  | 3 | 3.31 | 0.20 | -3.01 |
| IPI00394879 | Leucine-rich repeat-containing protein 9                  | K.LPEERVKLFVFKK.T                  | 1 | 2.36 | 0.05 |       |
| IPI00394992 | Isoform 2 of N-acetylmuramoyl-L-alanine amidase precursor | A.SLPLLM*DSVIQALAELEQK.V           | 2 | 6.11 | 0.46 | -4.29 |
| IPI00394992 | Isoform 2 of N-acetylmuramoyl-L-alanine amidase precursor | A.SLPLLM*DSVIQALAELEQK.V           | 3 | 5.28 | 0.35 | -3.10 |
| IPI00394992 | Isoform 2 of N-acetylmuramoyl-L-alanine amidase precursor | A.SLPLLM*DSVIQALAELEQKVPAAK.T      | 2 | 4.82 | 0.48 | -4.58 |
| IPI00394992 | Isoform 2 of N-acetylmuramoyl-L-alanine amidase precursor | A.SLPLLM*DSVIQALAELEQKVPAAK.T      | 4 | 4.95 | 0.44 | -2.28 |
| IPI00394992 | Isoform 2 of N-acetylmuramoyl-L-alanine amidase precursor | A.SLPLLMDSVIQALAELEQK.V            | 2 | 4.45 | 0.41 | -2.33 |
| IPI00394992 | Isoform 2 of N-acetylmuramoyl-L-alanine amidase precursor | A.SLPLLMDSVIQALAELEQKVPAAK.T       | 2 | 5.34 | 0.38 | -4.42 |
| IPI00394992 | Isoform 2 of N-acetylmuramoyl-L-alanine amidase precursor | D.GSPDVTTADIGANTPDATK.G            | 2 | 4.15 | 0.51 | -2.32 |
| IPI00394992 | Isoform 2 of N-acetylmuramoyl-L-alanine amidase precursor | E.TGDTFPDVVAIAPDVR.A               | 2 | 2.90 | 0.16 | -4.28 |
| IPI00394992 | Isoform 2 of N-acetylmuramoyl-L-alanine amidase precursor | K.ASLTLM*AFLNGALDGVILGDYLSR.T      | 2 | 5.56 | 0.51 | -5.10 |
| IPI00394992 | Isoform 2 of N-acetylmuramoyl-L-alanine amidase precursor | K.EFTEAFLGCPAIHPR.C                | 3 | 2.72 | 0.38 | -2.71 |
| IPI00394992 | Isoform 2 of N-acetylmuramoyl-L-alanine amidase precursor | K.EYGVVLAPDGGSTVAVEPLLAGLEAGLQGR.R | 2 | 5.16 | 0.59 | -2.92 |
| IPI00394992 | Isoform 2 of N-acetylmuramoyl-L-alanine amidase precursor | K.EYGVVLAPDGGSTVAVEPLLAGLEAGLQGR.R | 3 | 6.62 | 0.54 | -4.62 |
| IPI00394992 | Isoform 2 of N-acetylmuramoyl-L-alanine amidase precursor | K.GCPDVQASLPDAK.A                  | 2 | 2.72 | 0.30 | -2.48 |
| IPI00394992 | Isoform 2 of N-acetylmuramoyl-L-alanine amidase precursor | K.LLQLPLGFLYVHHTYVPAPPCTDFTR.C     | 3 | 3.87 | 0.33 | -4.57 |
| IPI00394992 | Isoform 2 of N-acetylmuramoyl-L-alanine amidase precursor | K.LLQLPLGFLYVHHTYVPAPPCTDFTR.C     | 4 | 2.63 | 0.10 | -4.36 |
| IPI00394992 | Isoform 2 of N-acetylmuramoyl-L-alanine amidase precursor | L.PLLM*DSVIQALAELEQKVPAAK.T        | 3 | 3.98 | 0.43 | -1.03 |
| IPI00394992 | Isoform 2 of N-acetylmuramoyl-L-alanine amidase precursor | M.AFLNGALDGVILGDYLSR.T             | 2 | 5.52 | 0.53 | -6.31 |
| IPI00394992 | Isoform 2 of N-acetylmuramoyl-L-alanine amidase precursor | M.AFLNGALDGVILGDYLSR.T             | 3 | 4.19 | 0.29 | -3.82 |
| IPI00394992 | Isoform 2 of N-acetylmuramoyl-L-alanine amidase precursor | R.AGLLRPDYALLGHR.Q                 | 2 | 3.86 | 0.46 | -2.08 |
| IPI00394992 | Isoform 2 of N-acetylmuramoyl-L-alanine amidase precursor | R.AGLLRPDYALLGHR.Q                 | 3 | 4.59 | 0.35 | -2.91 |

|             |                                                           |                                            |   |      |      |       |
|-------------|-----------------------------------------------------------|--------------------------------------------|---|------|------|-------|
| IPI00394992 | Isoform 2 of N-acetylmuramoyl-L-alanine amidase precursor | R.DGSPDVTADIGANTPDATK.G                    | 2 | 6.12 | 0.59 | -2.87 |
| IPI00394992 | Isoform 2 of N-acetylmuramoyl-L-alanine amidase precursor | R.DGSPDVTADIGANTPDATK.G                    | 3 | 3.31 | 0.35 | -1.24 |
| IPI00394992 | Isoform 2 of N-acetylmuramoyl-L-alanine amidase precursor | R.DTLPSCAVR.A                              | 2 | 2.69 | 0.27 | -3.42 |
| IPI00394992 | Isoform 2 of N-acetylmuramoyl-L-alanine amidase precursor | R.EGKEYGVVLAPDGSTVAVEPLLAGLEAGLQGR.R       | 2 | 3.34 | 0.52 | -3.71 |
| IPI00394992 | Isoform 2 of N-acetylmuramoyl-L-alanine amidase precursor | R.EGKEYGVVLAPDGSTVAVEPLLAGLEAGLQGR.R       | 3 | 7.36 | 0.64 | -4.83 |
| IPI00394992 | Isoform 2 of N-acetylmuramoyl-L-alanine amidase precursor | R.PSLSHLLSQYYGAGVAR.D                      | 2 | 4.86 | 0.49 | -5.19 |
| IPI00394992 | Isoform 2 of N-acetylmuramoyl-L-alanine amidase precursor | R.PSLSHLLSQYYGAGVAR.D                      | 3 | 5.19 | 0.39 | -4.26 |
| IPI00394992 | Isoform 2 of N-acetylmuramoyl-L-alanine amidase precursor | R.QNGAALTSASILAQQVWGTLVLLQR.L              | 3 | 4.32 | 0.19 | -3.01 |
| IPI00394992 | Isoform 2 of N-acetylmuramoyl-L-alanine amidase precursor | R.QNGAALTSASILAQQVWGTLVLLQR.L              | 4 | 2.99 | 0.13 | -0.95 |
| IPI00394992 | Isoform 2 of N-acetylmuramoyl-L-alanine amidase precursor | R.RVINLPLDSM*AAPWETGDTFPDVVAIAPDVR.A       | 3 | 5.87 | 0.53 | -3.82 |
| IPI00394992 | Isoform 2 of N-acetylmuramoyl-L-alanine amidase precursor | R.TDCPGDALFDLLR.T                          | 2 | 3.97 | 0.36 | -3.05 |
| IPI00394992 | Isoform 2 of N-acetylmuramoyl-L-alanine amidase precursor | R.TFTLLDPK.A                               | 2 | 2.53 | 0.25 | -2.38 |
| IPI00394992 | Isoform 2 of N-acetylmuramoyl-L-alanine amidase precursor | R.TPEPRPSLSHLLSQYYGAGVAR.D                 | 2 | 3.46 | 0.36 | -4.66 |
| IPI00394992 | Isoform 2 of N-acetylmuramoyl-L-alanine amidase precursor | R.TPEPRPSLSHLLSQYYGAGVAR.D                 | 3 | 5.70 | 0.49 | -4.27 |
| IPI00394992 | Isoform 2 of N-acetylmuramoyl-L-alanine amidase precursor | R.TPEPRPSLSHLLSQYYGAGVAR.D                 | 4 | 3.73 | 0.36 | -3.26 |
| IPI00394992 | Isoform 2 of N-acetylmuramoyl-L-alanine amidase precursor | S.LPLLM*DSVIQALAELEQKVPAAK.T               | 3 | 5.73 | 0.49 | -3.66 |
| IPI00394992 | Isoform 2 of N-acetylmuramoyl-L-alanine amidase precursor | W.ETGDTFPDVVAIAPDVR.A                      | 2 | 3.69 | 0.41 | -2.18 |
| IPI00394992 | Isoform 2 of N-acetylmuramoyl-L-alanine amidase precursor | W.ETGDTFPDVVAIAPDVR.A                      | 3 | 3.98 | 0.20 | -2.12 |
| IPI00395488 | Vasorin precursor                                         | R.ESHVTLASPEETR.C                          | 2 | 3.58 | 0.42 | -2.34 |
| IPI00395488 | Vasorin precursor                                         | R.ESHVTLASPEETR.C                          | 3 | 2.67 | 0.15 | -1.50 |
| IPI00395488 | Vasorin precursor                                         | R.HIQPGAFDTLDR.L                           | 2 | 3.00 | 0.37 | -2.73 |
| IPI00395488 | Vasorin precursor                                         | R.HIQPGAFDTLDR.L                           | 3 | 2.55 | 0.11 | -3.52 |
| IPI00395488 | Vasorin precursor                                         | R.IAQLRPEDLAGLAALQELDVSNLSLQALPGDLSGLFPR.L | 3 | 7.55 | 0.68 | -3.69 |
| IPI00395488 | Vasorin precursor                                         | R.IAQLRPEDLAGLAALQELDVSNLSLQALPGDLSGLFPR.L | 4 | 4.75 | 0.45 | -3.32 |

|             |                                                                            |                                            |   |      |      |       |
|-------------|----------------------------------------------------------------------------|--------------------------------------------|---|------|------|-------|
| IPI00395488 | Vasorin precursor                                                          | R.IAQLRPEDLAGLAALQELDVSNLSLQALPGDLSGLFPR.L | 5 | 3.44 | 0.31 | -4.39 |
| IPI00395488 | Vasorin precursor                                                          | R.IAQLRPEDLAGLAALQELDVSNLSLQALPGDLSGLFPR.L | 6 | 3.07 | 0.18 | -0.92 |
| IPI00395488 | Vasorin precursor                                                          | R.IRHIQPGAFDTLDR.L                         | 2 | 3.74 | 0.19 | -4.05 |
| IPI00395488 | Vasorin precursor                                                          | R.LAGLGLQQLDEGLFSR.L                       | 2 | 5.22 | 0.50 | -4.04 |
| IPI00395488 | Vasorin precursor                                                          | R.LLLLDLSHNSLLALEPGILDANVEALR.L            | 3 | 5.78 | 0.45 | -6.84 |
| IPI00395488 | Vasorin precursor                                                          | R.LLLLDLSHNSLLALEPGILDANVEALR.L            | 4 | 3.77 | 0.28 | -5.48 |
| IPI00395488 | Vasorin precursor                                                          | R.LRNLHDLVDSDNQLER.V                       | 2 | 6.03 | 0.53 | -1.62 |
| IPI00395488 | Vasorin precursor                                                          | R.LRNLHDLVDSDNQLER.V                       | 3 | 5.08 | 0.24 | -3.55 |
| IPI00395488 | Vasorin precursor                                                          | R.NLHDLVDSDNQLER.V                         | 2 | 4.37 | 0.51 | -0.66 |
| IPI00395488 | Vasorin precursor                                                          | R.NLHDLVDSDNQLER.V                         | 3 | 4.08 | 0.24 | -2.02 |
| IPI00395488 | Vasorin precursor                                                          | R.SLTGLGIEPVSPSLR.V                        | 2 | 4.48 | 0.43 | -3.29 |
| IPI00395488 | Vasorin precursor                                                          | R.YLQGSSVQLR.S                             | 1 | 2.08 | 0.16 | -1.26 |
| IPI00395488 | Vasorin precursor                                                          | R.YLQGSSVQLR.S                             | 2 | 3.17 | 0.27 | -1.29 |
| IPI00395866 | SCUBE1 protein                                                             | K.YALHSDGR.T                               | 2 | 2.32 | 0.29 | -3.08 |
| IPI00396077 | Isoform 1 of E3 ubiquitin-protein ligase Topors                            | K.HKKHHGDNASRSPVITIDSDSDK.D                | 2 | 2.40 | 0.14 |       |
| IPI00396378 | Isoform B1 of Heterogeneous nuclear ribonucleoproteins A2/B1               | R.GFGFVTFDDHDPVKIVLQK.Y                    | 3 | 3.74 | 0.40 | -5.30 |
| IPI00396378 | Isoform B1 of Heterogeneous nuclear ribonucleoproteins A2/B1               | R.GFGFVTFSSMAEVDAAMAARPHSIDGR.V            | 3 | 2.94 | 0.21 | -3.75 |
| IPI00396378 | Isoform B1 of Heterogeneous nuclear ribonucleoproteins A2/B1               | R.QEM*QEVQSSR.S                            | 2 | 2.48 | 0.26 | -2.56 |
| IPI00396383 | Isoform 1 of von Willebrand factor A domain-containing protein 1 precursor | R.APTPGTASREP.-                            | 2 | 2.50 | 0.32 | -0.29 |
| IPI00396383 | Isoform 1 of von Willebrand factor A domain-containing protein 1 precursor | R.GSILDAM*RPQQLHATEITSSGFR.L               | 3 | 2.51 | 0.26 | -3.24 |
| IPI00396423 | Alcadein beta                                                              | E.IVHNLGCEISLVGDDLDPERESLLDTSLQQR.G        | 3 | 6.33 | 0.51 | -3.46 |
| IPI00396423 | Alcadein beta                                                              | E.IVHNLGCEISLVGDDLDPERESLLDTSLQQR.G        | 4 | 4.55 | 0.33 | -2.95 |
| IPI00396423 | Alcadein beta                                                              | H.VLSSQQFLHR.G                             | 2 | 3.20 | 0.17 | -2.00 |
| IPI00396423 | Alcadein beta                                                              | K.RIEYAPGAGSLALFPGIR.L                     | 2 | 4.11 | 0.47 | -3.67 |
| IPI00396423 | Alcadein beta                                                              | K.VHVNPSQSLLTLEGDDVETFNHALQHV.A            | 3 | 5.09 | 0.53 | -4.36 |
| IPI00396423 | Alcadein beta                                                              | K.VHVNPSQSLLTLEGDDVETFNHALQHVAYM*NTLR.F    | 4 | 3.87 | 0.26 | -3.40 |
| IPI00396423 | Alcadein beta                                                              | R.EGLDYRDFESLQK.G                          | 2 | 2.74 | 0.26 | 0.71  |
| IPI00396423 | Alcadein beta                                                              | R.EGLDYRDFESLQK.G                          | 3 | 3.04 | 0.22 | -0.86 |
| IPI00396423 | Alcadein beta                                                              | R.ESLLDTSLQQR.G                            | 2 | 4.18 | 0.42 | -1.92 |
| IPI00396423 | Alcadein beta                                                              | R.EVIECLYACR.E                             | 2 | 2.51 | 0.34 | -3.38 |
| IPI00396423 | Alcadein beta                                                              | R.FATPGVRPLR.L                             | 2 | 1.91 | 0.07 | -1.49 |
| IPI00396423 | Alcadein beta                                                              | R.GHQPPPEM*AGHSLASSHR.N                    | 2 | 3.91 | 0.49 | -4.98 |
| IPI00396423 | Alcadein beta                                                              | R.IEYAPGAGSLALFPGIR.L                      | 2 | 3.38 | 0.31 |       |
| IPI00396423 | Alcadein beta                                                              | R.LHGSGVPFEAVILDKATGEGILR.A                | 4 | 3.64 | 0.09 | -3.07 |
| IPI00396423 | Alcadein beta                                                              | R.LSCSEM*NGR.Y                             | 2 | 1.90 | 0.11 | -2.59 |
| IPI00396423 | Alcadein beta                                                              | R.M*SDEIVHNLGCEISLVGDDLDPERESLLDTSLQQR.G   | 3 | 4.84 | 0.51 | -2.40 |
| IPI00396423 | Alcadein beta                                                              | R.M*SDEIVHNLGCEISLVGDDLDPERESLLDTSLQQR.G   | 4 | 5.11 | 0.26 | -5.03 |

|             |                                                                                    |                                       |   |      |      |       |
|-------------|------------------------------------------------------------------------------------|---------------------------------------|---|------|------|-------|
| IPI00396423 | Alcadein beta                                                                      | R.YAGEICGFR.L                         | 2 | 2.50 | 0.22 | -2.12 |
| IPI00396423 | Alcadein beta                                                                      | V.LSSQQFLHR.G                         | 2 | 3.28 | 0.23 | -1.70 |
| IPI00396930 | Uncharacterized protein ENSP00000353216 (Fragment)                                 | R.AEDTAVYYCVK.H                       | 2 | 4.09 | 0.12 |       |
| IPI00396930 | Uncharacterized protein ENSP00000353216 (Fragment)                                 | R.DNANNSPYLQM*NSLR.A                  | 2 | 2.91 | 0.13 |       |
| IPI00396961 | Leucine-rich repeat and fibronectin type-III domain-containing protein 5 precursor | K.DTGAFTCIASNPAGEATQIVDLHIK.L         | 3 | 4.05 | 0.49 | -3.50 |
| IPI00396961 | Leucine-rich repeat and fibronectin type-III domain-containing protein 5 precursor | R.LADNFVTNIK.R                        | 2 | 2.78 | 0.20 | -2.31 |
| IPI00397578 | 135 kDa protein                                                                    | T.ELRAEEIETRVTS GSM*EALNLK.Q          | 2 | 2.91 | 0.16 | -7.99 |
| IPI00397645 | Isoform 2 of Matrix-remodeling-associated protein 7                                | G.LGELGEPAGPGEPEPGDPAAAPAEAEQAVEAR.Q  | 3 | 4.85 | 0.45 | -3.09 |
| IPI00397645 | Isoform 2 of Matrix-remodeling-associated protein 7                                | K.M*M*TKEELEEQRTEE.-                  | 2 | 3.28 | 0.49 | -4.07 |
| IPI00397645 | Isoform 2 of Matrix-remodeling-associated protein 7                                | K.M*M*TKEELEEQRTEE.-                  | 3 | 2.56 | 0.15 | -2.69 |
| IPI00397645 | Isoform 2 of Matrix-remodeling-associated protein 7                                | R.QEEEEQLDGEKGPSSEGEPEEEDGEGFSFK.Y    | 3 | 5.35 | 0.41 | -1.93 |
| IPI00397949 | G protein-coupled receptor 56 isoform b                                            | R.DLQLLSQFLK.H                        | 2 | 2.88 | 0.24 | -3.76 |
| IPI00398154 | actin filament associated protein 1                                                | K.KSSKSEAKGTVSKVTGKKITKIISLGGK.K      | 3 | 2.94 | 0.12 |       |
| IPI00398229 | similar to deubiquitinating enzyme 3                                               | K.NVQYPK.C                            | 1 | 1.64 | 0.05 | -1.63 |
| IPI00398715 | Neuropilin 1                                                                       | K.EGNKPVLFQGNTPNTD VVAVFPKPLITR.F     | 3 | 3.04 | 0.35 | -4.25 |
| IPI00398715 | Neuropilin 1                                                                       | K.EGNKPVLFQGNTPNTD VVAVFPKPLITR.F     | 4 | 3.51 | 0.30 | -2.50 |
| IPI00398715 | Neuropilin 1                                                                       | K.FVSDYETHGAGFSIR.Y                   | 2 | 4.43 | 0.47 | -4.03 |
| IPI00398715 | Neuropilin 1                                                                       | K.IAPPPVSSGPFLFIK.F                   | 2 | 1.36 | 0.49 | -3.69 |
| IPI00398715 | Neuropilin 1                                                                       | K.IAPPPVSSGPFLFIK.F                   | 3 | 4.77 | 0.46 | -1.49 |
| IPI00398715 | Neuropilin 1                                                                       | K.SFEGNNNYDTPELR.T                    | 2 | 3.75 | 0.46 | -4.94 |
| IPI00398715 | Neuropilin 1                                                                       | R.EWIVQDLGLLR.F                       | 2 | 3.02 | 0.36 | -2.23 |
| IPI00398715 | Neuropilin 1                                                                       | R.FVTAVGTQGAISK.E                     | 2 | 4.71 | 0.37 | -3.52 |
| IPI00398715 | Neuropilin 1                                                                       | R.IM*INFNPFDLEDR.D                    | 3 | 3.14 | 0.19 | -3.83 |
| IPI00398918 | Putative uncharacterized protein DKFZp686I21167                                    | K.FPHPIEISEDVITGPTIK.N                | 3 | 2.32 | 0.16 | -2.65 |
| IPI00398918 | Putative uncharacterized protein DKFZp686I21167                                    | K.QTQKFPHPPIEISEDVITGPTIK.N           | 3 | 3.61 | 0.27 | -2.78 |
| IPI00398918 | Putative uncharacterized protein DKFZp686I21167                                    | K.SLTFDKEVK.V                         | 2 | 1.95 | 0.14 | -2.85 |
| IPI00398992 | Isoform 1 of Chromodomain-helicase-DNA-binding protein 8                           | R.SKLYDEESLLSLTMSQDGFP.N              | 3 | 3.76 | 0.23 | -1.93 |
| IPI00399089 | Mesoderm development candidate 2                                                   | R.DGSYAWIEIKDFLVGQDR.C                | 3 | 3.90 | 0.30 | -4.12 |
| IPI00399089 | Mesoderm development candidate 2                                                   | R.DYNDADM*AR.L                        | 2 | 2.29 | 0.16 | -1.96 |
| IPI00399180 | Serine/threonine-protein kinase SBK1                                               | K.VDLVVYK.G                           | 2 | 1.86 | 0.07 | -3.46 |
| IPI00399252 | Isoform 1 of Protein Jade-1                                                        | K.VNYNQTAVKVPTTPASPVKNWGGFRIPK.K      | 4 | 2.90 | 0.11 | -5.97 |
| IPI00399254 | Isoform 1 of OTU domain-containing protein 4                                       | K.CQVRLDHNGKFLNADVQGIHSENGPVLVEELGK.K | 3 | 3.84 | 0.18 | 0.97  |
| IPI00399296 | hypothetical protein LOC390110                                                     | R.GKTYMCK.E                           | 1 | 1.04 | 0.18 | -0.74 |

|             |                                                           |                                        |   |      |      |       |
|-------------|-----------------------------------------------------------|----------------------------------------|---|------|------|-------|
| IPI00399328 | similar to jumonji domain containing 2D                   | R.GCEAFLRHKVALISPTVLKENGIPFNCM*TQEAG.E | 3 | 3.68 | 0.14 | 0.44  |
| IPI00400935 | Isoform 1 of Collagen alpha-1(XVI) chain precursor        | R.AQGQDGFVSCIFVPQLFLDR.W               | 3 | 4.48 | 0.29 | -2.62 |
| IPI00400935 | Isoform 1 of Collagen alpha-1(XVI) chain precursor        | R.LGAAPVTQPTR.R                        | 2 | 2.67 | 0.33 | -2.07 |
| IPI00400967 | KIAA1843 protein (Fragment)                               | R.YQEQQAK.L                            | 2 | 1.28 | 0.12 | -2.97 |
| IPI00400986 | hypothetical protein LOC85459                             | P.QQDNLKALQEQLATQR.E                   | 2 | 3.05 | 0.28 | -5.27 |
| IPI00401264 | Thioredoxin domain-containing protein 4 precursor         | R.DLAEITTLDR.S                         | 2 | 3.92 | 0.36 | -3.86 |
| IPI00401264 | Thioredoxin domain-containing protein 4 precursor         | R.FSQM*LHPIFEEASDVIKEEFPNENQVVFAR.V    | 4 | 3.04 | 0.21 | -4.63 |
| IPI00401264 | Thioredoxin domain-containing protein 4 precursor         | R.HM*YVFGDFKDLIPGK.L                   | 3 | 2.84 | 0.32 | -3.80 |
| IPI00401264 | Thioredoxin domain-containing protein 4 precursor         | R.HM*YVFGDFKDLIPGK.L                   | 4 | 3.32 | 0.26 | -3.40 |
| IPI00401283 | Multiple epidermal growth factor-like domains 9 precursor | K.VGVIGSICDR.C                         | 2 | 3.57 | 0.34 | -2.15 |
| IPI00401283 | Multiple epidermal growth factor-like domains 9 precursor | R.CPCSAVTSTGSCSIK.S                    | 2 | 4.10 | 0.42 | -2.39 |
| IPI00401283 | Multiple epidermal growth factor-like domains 9 precursor | R.CQDGYGFSK.N                          | 2 | 2.30 | 0.24 | -2.33 |
| IPI00401283 | Multiple epidermal growth factor-like domains 9 precursor | R.GEPSHPFPR.A                          | 2 | 2.14 | 0.36 | 0.32  |
| IPI00401852 | Conserved hypothetical protein                            | R.KM*PGDM*SSSPR.V                      | 3 | 2.31 | 0.18 |       |
| IPI00402144 | Isoform 1 of Zinc finger protein 555                      | K.ECGKVFKWPSLPIHM*R.L                  | 3 | 2.49 | 0.21 | -2.49 |
| IPI00402157 | Cerebellin-3 precursor                                    | R.AAAGPGGAALGEAPPGR.V                  | 2 | 4.97 | 0.50 | -3.30 |
| IPI00402157 | Cerebellin-3 precursor                                    | R.AAAGPGGAALGEAPPGR.V                  | 3 | 3.71 | 0.19 | -2.20 |
| IPI00402157 | Cerebellin-3 precursor                                    | R.AAAGPGGAALGEAPPGRV.A                 | 2 | 3.70 | 0.40 | -2.41 |
| IPI00402157 | Cerebellin-3 precursor                                    | R.ASGSFVAPVR.G                         | 1 | 1.88 | 0.22 | -2.76 |
| IPI00402157 | Cerebellin-3 precursor                                    | R.ASGSFVAPVR.G                         | 2 | 3.39 | 0.24 | -0.89 |
| IPI00402157 | Cerebellin-3 precursor                                    | R.ASGSFVAPVRGVYSFR.F                   | 2 | 2.20 | 0.11 | -3.35 |
| IPI00402157 | Cerebellin-3 precursor                                    | R.EAATSSVLLPLDPGDR.V                   | 2 | 3.61 | 0.24 | -4.51 |
| IPI00402157 | Cerebellin-3 precursor                                    | R.EAATSSVLLPLDPGDRVSLR.L               | 2 | 2.28 | 0.20 | -3.16 |
| IPI00402157 | Cerebellin-3 precursor                                    | R.EAATSSVLLPLDPGDRVSLR.L               | 3 | 2.88 | 0.28 | -2.82 |
| IPI00402293 | Arylsulfatase G precursor                                 | K.AFYITGGAR.A                          | 2 | 2.73 | 0.25 | -2.78 |
| IPI00402293 | Arylsulfatase G precursor                                 | R.VLFHPNSGAGEFGALQTVR.L                | 3 | 2.62 | 0.16 | -4.69 |
| IPI00402293 | Arylsulfatase G precursor                                 | R.YKAFYITGGAR.A                        | 3 | 2.87 | 0.05 | -3.99 |
| IPI00409640 | Isoform 1 of Lipolysis-stimulated lipoprotein receptor    | K.QGNAVTLGDYYQGR.R                     | 2 | 2.22 | 0.19 | -2.35 |
| IPI00409640 | Isoform 1 of Lipolysis-stimulated lipoprotein receptor    | R.IQASQQDDSM*R.V                       | 2 | 3.30 | 0.40 | -3.03 |
| IPI00409640 | Isoform 1 of Lipolysis-stimulated lipoprotein receptor    | R.SGDLPYDGR.L                          | 2 | 2.53 | 0.22 | -2.76 |
| IPI00409640 | Isoform 1 of Lipolysis-stimulated lipoprotein receptor    | R.SRDDLYDQDDSRDFPR.S                   | 3 | 2.41 | 0.24 | -2.19 |



|             |                                                           |                                        |   |      |      |       |
|-------------|-----------------------------------------------------------|----------------------------------------|---|------|------|-------|
| IPI00409640 | Isoform 1 of Lipolysis-stimulated lipoprotein receptor    | R.SRDPHYDDFR.S                         | 2 | 2.53 | 0.24 | -3.47 |
| IPI00409640 | Isoform 1 of Lipolysis-stimulated lipoprotein receptor    | R.SVDALDDLTPSTAESGSR.S                 | 2 | 4.50 | 0.31 | -5.34 |
| IPI00410013 | Isoform 1 of Zinc finger CCCH domain-containing protein 3 | R.HSRRATSPAPGPSDATARSRVASASHGPR.K      | 3 | 2.92 | 0.13 |       |
| IPI00410079 | Isoform 1 of Protein FAM82C                               | K.TATALLESPLSATVEDALQSFLK.A            | 2 | 5.37 | 0.59 | -4.48 |
| IPI00410079 | Isoform 1 of Protein FAM82C                               | K.TATALLESPLSATVEDALQSFLK.A            | 3 | 3.69 | 0.31 | -4.07 |
| IPI00410079 | Isoform 1 of Protein FAM82C                               | K.TATALLESPLSATVEDALQSFLKAEELQPGFSK.A  | 3 | 4.10 | 0.40 | -4.11 |
| IPI00410079 | Isoform 1 of Protein FAM82C                               | K.TATALLESPLSATVEDALQSFLKAEELQPGFSK.A  | 4 | 3.16 | 0.14 | -4.04 |
| IPI00410093 | coiled-coil domain containing 69                          | R.DRLDEQQRVLEGGKNEEALQVLR.A            | 3 | 3.58 | 0.06 |       |
| IPI00410122 | Isoform 1 of Plexin domain-containing protein 1 precursor | K.IHTILSNTHR.Q                         | 2 | 2.56 | 0.15 | -4.26 |
| IPI00410122 | Isoform 1 of Plexin domain-containing protein 1 precursor | K.TGLSDAFM*ILNPSDPVPEZR.R              | 3 | 4.35 | 0.28 | -4.20 |
| IPI00410122 | Isoform 1 of Plexin domain-containing protein 1 precursor | R.LYGPSEPHSR.E                         | 2 | 2.40 | 0.21 | -2.91 |
| IPI00410122 | Isoform 1 of Plexin domain-containing protein 1 precursor | R.VVEDNHSYYVSR.L                       | 2 | 3.62 | 0.36 | -1.66 |
| IPI00410122 | Isoform 1 of Plexin domain-containing protein 1 precursor | R.VVLSFDFPFYGHPLR.Q                    | 2 | 1.89 | 0.18 | 0.02  |
| IPI00410210 | Isoform 2 of Latrophilin-1 precursor                      | K.LM*EQLLDILDAQLQALRPIER.E             | 3 | 2.99 | 0.11 | -4.10 |
| IPI00410210 | Isoform 2 of Latrophilin-1 precursor                      | K.SGETVINTANYHDTSPYR.W                 | 2 | 5.31 | 0.62 | -3.33 |
| IPI00410210 | Isoform 2 of Latrophilin-1 precursor                      | R.AGLPFGLM*R.R                         | 2 | 2.48 | 0.17 | -1.32 |
| IPI00410210 | Isoform 2 of Latrophilin-1 precursor                      | R.CPGSDVIM*VENANYGR.T                  | 2 | 4.08 | 0.33 | -5.50 |
| IPI00410210 | Isoform 2 of Latrophilin-1 precursor                      | R.EEPVSLTFPNPYQFISSVDYNPR.D            | 3 | 4.39 | 0.46 | -4.12 |
| IPI00410210 | Isoform 2 of Latrophilin-1 precursor                      | R.ELACEGYPIELR.C                       | 1 | 1.78 | 0.35 | -3.29 |
| IPI00410210 | Isoform 2 of Latrophilin-1 precursor                      | R.ELACEGYPIELR.C                       | 2 | 3.96 | 0.38 | -4.14 |
| IPI00410210 | Isoform 2 of Latrophilin-1 precursor                      | R.IKSGETVINTANYHDTSPYR.W               | 2 | 5.95 | 0.60 | -1.83 |
| IPI00410210 | Isoform 2 of Latrophilin-1 precursor                      | R.IKSGETVINTANYHDTSPYR.W               | 3 | 4.23 | 0.45 | -0.15 |
| IPI00410210 | Isoform 2 of Latrophilin-1 precursor                      | R.IYVM*PWIPYR.T                        | 2 | 2.78 | 0.19 | -2.17 |
| IPI00410210 | Isoform 2 of Latrophilin-1 precursor                      | R.LPNRVDGTGFVYDGAVFYNKER.T             | 4 | 3.21 | 0.20 | -3.35 |
| IPI00410210 | Isoform 2 of Latrophilin-1 precursor                      | R.LVVSQLNPYTLR.F                       | 1 | 2.49 | 0.20 | -2.41 |
| IPI00410210 | Isoform 2 of Latrophilin-1 precursor                      | R.LVVSQLNPYTLR.F                       | 2 | 4.31 | 0.40 | -3.40 |
| IPI00410210 | Isoform 2 of Latrophilin-1 precursor                      | R.SVYVDDDSEAAGNR.V                     | 2 | 3.58 | 0.54 | -3.78 |
| IPI00410210 | Isoform 2 of Latrophilin-1 precursor                      | R.SVYVDDDSEAAGNRVDYAFNTNANR.E          | 3 | 3.69 | 0.45 | -3.03 |
| IPI00410210 | Isoform 2 of Latrophilin-1 precursor                      | R.TDDKICDADPFQM*ENVQCYPDAFK.I          | 3 | 5.37 | 0.57 | -3.51 |
| IPI00410210 | Isoform 2 of Latrophilin-1 precursor                      | R.TDTLTEYASWEDYVAAR.H                  | 2 | 5.22 | 0.58 | -4.64 |
| IPI00410210 | Isoform 2 of Latrophilin-1 precursor                      | R.TQCVVAGSDAFDPDPCPGTYK.Y              | 2 | 5.27 | 0.57 | -3.64 |
| IPI00410210 | Isoform 2 of Latrophilin-1 precursor                      | R.TQCVVAGSDAFDPDPCPGTYK.Y              | 3 | 2.89 | 0.19 | -3.30 |
| IPI00410210 | Isoform 2 of Latrophilin-1 precursor                      | R.VDYAFNTNANREEPVSLTFPNPYQFISSVDYNPR.D | 3 | 4.06 | 0.43 | -1.56 |

|             |                                                                                  |                                        |   |      |      |       |
|-------------|----------------------------------------------------------------------------------|----------------------------------------|---|------|------|-------|
| IPI00410487 | Isoform 1 of Twisted gastrulation protein homolog 1 precursor                    | K.ALCASDVSK.C                          | 1 | 2.18 | 0.28 | -1.32 |
| IPI00410487 | Isoform 1 of Twisted gastrulation protein homolog 1 precursor                    | K.ALCASDVSK.C                          | 2 | 2.14 | 0.18 | -3.57 |
| IPI00410487 | Isoform 1 of Twisted gastrulation protein homolog 1 precursor                    | K.ISCESM*GASK.Y                        | 2 | 3.03 | 0.37 | -1.72 |
| IPI00410487 | Isoform 1 of Twisted gastrulation protein homolog 1 precursor                    | K.STVEELHEPIPSLFR.A                    | 2 | 3.21 | 0.39 | -2.17 |
| IPI00410487 | Isoform 1 of Twisted gastrulation protein homolog 1 precursor                    | K.STVEELHEPIPSLFR.A                    | 3 | 2.67 | 0.23 | -0.07 |
| IPI00410488 | Isoform 1 of CD276 antigen precursor                                             | R.SPTGAVEVQVPEDPVVALVGTDLR.C           | 3 | 3.17 | 0.28 | -2.76 |
| IPI00410585 | Isoform 1 of Crumbs homolog 2 precursor                                          | R.GGHGLPGAVLPPIGPR.V                   | 3 | 2.61 | 0.08 | -2.45 |
| IPI00410585 | Isoform 1 of Crumbs homolog 2 precursor                                          | R.SDPALYGGVQAAPFGAFSFR.H               | 2 | 4.62 | 0.50 | -5.24 |
| IPI00410585 | Isoform 1 of Crumbs homolog 2 precursor                                          | R.VALGGLPLPLARPRPGAAPGAR.E             | 3 | 2.40 | 0.20 | -3.08 |
| IPI00410585 | Isoform 1 of Crumbs homolog 2 precursor                                          | R.WLLWLDGAATPVALR.G                    | 2 | 4.13 | 0.49 | -4.47 |
| IPI00410588 | ADAMTS-like protein 3 precursor                                                  | A.EKSPGAYFLPEFALSPPQGSFLEDTTGEQFLTYR.Y | 3 | 4.71 | 0.47 | -4.18 |
| IPI00410600 | Isoform 3 of Voltage-dependent calcium channel subunit alpha-2/delta-2 precursor | K.ADAELDDPESEDVER.G                    | 2 | 4.83 | 0.48 | -2.56 |
| IPI00410600 | Isoform 3 of Voltage-dependent calcium channel subunit alpha-2/delta-2 precursor | K.EAVQGM*VAK.G                         | 1 | 1.43 | 0.21 | -3.74 |
| IPI00410600 | Isoform 3 of Voltage-dependent calcium channel subunit alpha-2/delta-2 precursor | K.EAVQGM*VAK.G                         | 2 | 2.35 | 0.19 | -2.35 |
| IPI00410600 | Isoform 3 of Voltage-dependent calcium channel subunit alpha-2/delta-2 precursor | K.GYYFEIPSIGAIR.I                      | 2 | 4.23 | 0.36 | -4.59 |
| IPI00410600 | Isoform 3 of Voltage-dependent calcium channel subunit alpha-2/delta-2 precursor | K.IDLYDVR.R                            | 2 | 2.38 | 0.25 | -2.33 |
| IPI00410600 | Isoform 3 of Voltage-dependent calcium channel subunit alpha-2/delta-2 precursor | K.KIDLYDVR.R                           | 2 | 2.11 | 0.05 | -3.74 |
| IPI00410600 | Isoform 3 of Voltage-dependent calcium channel subunit alpha-2/delta-2 precursor | K.VAGDIESLLDR.K                        | 2 | 1.44 | 0.20 | -2.40 |
| IPI00410600 | Isoform 3 of Voltage-dependent calcium channel subunit alpha-2/delta-2 precursor | K.VAGDIESLLDRK.V                       | 2 | 3.01 | 0.30 | -1.68 |
| IPI00410600 | Isoform 3 of Voltage-dependent calcium channel subunit alpha-2/delta-2 precursor | K.VAGDIESLLDRK.V                       | 3 | 2.51 | 0.16 | -1.19 |
| IPI00410600 | Isoform 3 of Voltage-dependent calcium channel subunit alpha-2/delta-2 precursor | K.YFEFLLPSSFESEGHVFIAPR.E              | 3 | 3.70 | 0.37 | -2.77 |
| IPI00410600 | Isoform 3 of Voltage-dependent calcium channel subunit alpha-2/delta-2 precursor | R.DQDLNTYSL LAVFAATDGGITR.V            | 2 | 5.71 | 0.56 | -3.93 |
| IPI00410600 | Isoform 3 of Voltage-dependent calcium channel subunit alpha-2/delta-2 precursor | R.DQDLNTYSL LAVFAATDGGITR.V            | 3 | 3.40 | 0.14 | -2.35 |
| IPI00410600 | Isoform 3 of Voltage-dependent calcium channel subunit alpha-2/delta-2 precursor | R.IFGGVQQLR.E                          | 2 | 3.58 | 0.13 | -1.94 |

|             |                                                                                  |                                        |   |      |      |       |
|-------------|----------------------------------------------------------------------------------|----------------------------------------|---|------|------|-------|
| IPI00410600 | Isoform 3 of Voltage-dependent calcium channel subunit alpha-2/delta-2 precursor | R.INTQEYLDVLGRPM*VLAKG.E               | 2 | 4.20 | 0.50 | -3.96 |
| IPI00410600 | Isoform 3 of Voltage-dependent calcium channel subunit alpha-2/delta-2 precursor | R.INTQEYLDVLGRPM*VLAKG.E               | 3 | 3.55 | 0.24 | -0.15 |
| IPI00410600 | Isoform 3 of Voltage-dependent calcium channel subunit alpha-2/delta-2 precursor | R.LADAAENFQK.A                         | 2 | 2.78 | 0.24 | -2.96 |
| IPI00410600 | Isoform 3 of Voltage-dependent calcium channel subunit alpha-2/delta-2 precursor | R.LEQEVDGVM*R.I                        | 2 | 2.49 | 0.08 | -1.66 |
| IPI00410600 | Isoform 3 of Voltage-dependent calcium channel subunit alpha-2/delta-2 precursor | R.NLFEVQENEPQKLEK.V                    | 2 | 4.39 | 0.21 | -1.40 |
| IPI00410600 | Isoform 3 of Voltage-dependent calcium channel subunit alpha-2/delta-2 precursor | R.QDPTLLWQVFGSATGVTR.Y                 | 2 | 5.02 | 0.48 | -3.41 |
| IPI00410600 | Isoform 3 of Voltage-dependent calcium channel subunit alpha-2/delta-2 precursor | R.RLEQEVDGVM*R.I                       | 2 | 1.73 | 0.15 | -3.57 |
| IPI00410600 | Isoform 3 of Voltage-dependent calcium channel subunit alpha-2/delta-2 precursor | R.TLRPAVVGVK.L                         | 2 | 2.43 | 0.15 | -2.20 |
| IPI00410657 | Isoform 2 of mRNA cap guanine-N7 methyltransferase                               | K.VDDYEHAAYMKNSQVRLPLGTLK.S            | 3 | 2.47 | 0.14 | -5.91 |
| IPI00410675 | Syntaxin-1B                                                                      | K.TKQELEDLTADIKK.T                     | 3 | 4.40 | 0.39 | -1.88 |
| IPI00410675 | Syntaxin-1B                                                                      | R.ELHDMFVDMAMLVESQGEMIDR.I             | 3 | 3.01 | 0.26 | -2.35 |
| IPI00410714 | Hemoglobin subunit alpha                                                         | K.FLASVSTVLTSK.Y                       | 2 | 3.47 | 0.42 | -5.13 |
| IPI00410714 | Hemoglobin subunit alpha                                                         | K.GHGKKVADALTNAVAHVDDMPNALSALSDLHAHK.L | 5 | 3.66 | 0.19 | -3.33 |
| IPI00410714 | Hemoglobin subunit alpha                                                         | K.GHGKKVADALTNAVAHVDDMPNALSALSDLHAHK.L | 6 | 2.73 | 0.11 | -3.84 |
| IPI00410714 | Hemoglobin subunit alpha                                                         | K.KVADALTNAVAHVDDMPNALSALSDLHAHK.L     | 3 | 6.35 | 0.40 |       |
| IPI00410714 | Hemoglobin subunit alpha                                                         | K.KVADALTNAVAHVDDMPNALSALSDLHAHK.L     | 3 | 4.73 | 0.41 | -3.38 |
| IPI00410714 | Hemoglobin subunit alpha                                                         | K.KVADALTNAVAHVDDMPNALSALSDLHAHK.L     | 4 | 6.05 | 0.44 | -3.42 |
| IPI00410714 | Hemoglobin subunit alpha                                                         | K.KVADALTNAVAHVDDMPNALSALSDLHAHK.L     | 5 | 3.36 | 0.16 | -1.77 |
| IPI00410714 | Hemoglobin subunit alpha                                                         | K.KVADALTNAVAHVDDMPNALSALSDLHAHKLR.V   | 3 | 6.04 | 0.46 | -3.98 |
| IPI00410714 | Hemoglobin subunit alpha                                                         | K.KVADALTNAVAHVDDMPNALSALSDLHAHKLR.V   | 4 | 5.62 | 0.47 | -1.59 |
| IPI00410714 | Hemoglobin subunit alpha                                                         | K.KVADALTNAVAHVDDMPNALSALSDLHAHKLR.V   | 5 | 2.45 | 0.13 | -1.64 |
| IPI00410714 | Hemoglobin subunit alpha                                                         | K.LLSHCLLVTLAAHLPAEFTPAVHASLDK.F       | 4 | 4.87 | 0.46 | -4.65 |
| IPI00410714 | Hemoglobin subunit alpha                                                         | K.TYFPHFDLSHGSAQVK.G                   | 2 | 4.48 | 0.54 | -3.19 |
| IPI00410714 | Hemoglobin subunit alpha                                                         | K.TYFPHFDLSHGSAQVK.G                   | 3 | 2.97 | 0.35 | -3.39 |
| IPI00410714 | Hemoglobin subunit alpha                                                         | K.TYFPHFDLSHGSAQVK.G                   | 4 | 1.62 | 0.18 | -3.11 |
| IPI00410714 | Hemoglobin subunit alpha                                                         | K.TYFPHFDLSHGSAQVKHGKK.V               | 3 | 2.34 | 0.18 | -1.21 |
| IPI00410714 | Hemoglobin subunit alpha                                                         | K.VADALTNAVAHVDDMPNALSALSDLHAHK.L      | 2 | 5.41 | 0.52 |       |
| IPI00410714 | Hemoglobin subunit alpha                                                         | K.VADALTNAVAHVDDMPNALSALSDLHAHK.L      | 3 | 7.14 | 0.48 |       |
| IPI00410714 | Hemoglobin subunit alpha                                                         | K.VADALTNAVAHVDDMPNALSALSDLHAHK.L      | 3 | 5.80 | 0.55 | -3.90 |
| IPI00410714 | Hemoglobin subunit alpha                                                         | K.VADALTNAVAHVDDMPNALSALSDLHAHK.L      | 4 | 2.67 | 0.16 | -3.16 |
| IPI00410714 | Hemoglobin subunit alpha                                                         | K.VADALTNAVAHVDDMPNALSALSDLHAHK.L      | 5 | 3.44 | 0.31 | -2.88 |
| IPI00410714 | Hemoglobin subunit alpha                                                         | K.VGAHAGEYGAEALER.M                    | 1 | 3.92 | 0.39 |       |
| IPI00410714 | Hemoglobin subunit alpha                                                         | K.VGAHAGEYGAEALER.M                    | 2 | 3.86 | 0.54 | -4.08 |

|             |                                                                      |                                         |   |      |      |       |
|-------------|----------------------------------------------------------------------|-----------------------------------------|---|------|------|-------|
| IPI00410714 | Hemoglobin subunit alpha                                             | K.VGAHAGEYGAEALER.M                     | 3 | 4.67 | 0.24 | -2.78 |
| IPI00410714 | Hemoglobin subunit alpha                                             | R.M*FLSFPTTK.T                          | 1 | 2.23 | 0.08 | -3.24 |
| IPI00410714 | Hemoglobin subunit alpha                                             | R.M*FLSFPTTK.T                          | 2 | 2.78 | 0.23 | -1.48 |
| IPI00410714 | Hemoglobin subunit alpha                                             | R.MFLSFPTTK.T                           | 2 | 2.42 | 0.20 | -3.37 |
| IPI00411656 | Isoform 1 of Protein piccolo                                         | G.VTNGWTDSTVSGGITDGEVVDLSTTKSHR.T       | 3 | 3.65 | 0.10 | -7.20 |
| IPI00411656 | Isoform 1 of Protein piccolo                                         | K.ARHRPHGPLLPTIEDSSEEEELREEEELLK.E      | 3 | 1.53 | 0.11 | -5.15 |
| IPI00411656 | Isoform 1 of Protein piccolo                                         | K.DVVYK.N                               | 1 | 1.46 | 0.08 | -3.57 |
| IPI00411674 | Isoform 1 of Zinc finger protein 254                                 | K.KRVKLFM*LSHK.T                        | 2 | 3.07 | 0.05 |       |
| IPI00411680 | Isoform 1 of Protein-L-isoaspartate(D-aspartate) O-methyltransferase | K.ALDVSGSGILTACFAR.M                    | 2 | 5.06 | 0.61 | -3.94 |
| IPI00411680 | Isoform 1 of Protein-L-isoaspartate(D-aspartate) O-methyltransferase | K.ALDVSGSGILTACFAR.M                    | 3 | 2.64 | 0.13 | -2.64 |
| IPI00411680 | Isoform 1 of Protein-L-isoaspartate(D-aspartate) O-methyltransferase | K.DDPTLLSSGR.V                          | 2 | 2.96 | 0.19 | -0.14 |
| IPI00411680 | Isoform 1 of Protein-L-isoaspartate(D-aspartate) O-methyltransferase | K.ELVDDSIINVR.K                         | 2 | 3.16 | 0.41 | -2.15 |
| IPI00411680 | Isoform 1 of Protein-L-isoaspartate(D-aspartate) O-methyltransferase | K.M*KPLM*GVIYVPLTDKEK.Q                 | 3 | 3.41 | 0.27 | -2.63 |
| IPI00411680 | Isoform 1 of Protein-L-isoaspartate(D-aspartate) O-methyltransferase | K.TDKVFEVM*LATDR.S                      | 2 | 3.01 | 0.30 | -0.67 |
| IPI00411680 | Isoform 1 of Protein-L-isoaspartate(D-aspartate) O-methyltransferase | K.VFEVM*LATDR.S                         | 2 | 2.78 | 0.35 | -3.44 |
| IPI00411680 | Isoform 1 of Protein-L-isoaspartate(D-aspartate) O-methyltransferase | K.VIGIDHIK.E                            | 1 | 1.56 | 0.18 | -4.20 |
| IPI00411680 | Isoform 1 of Protein-L-isoaspartate(D-aspartate) O-methyltransferase | K.VIGIDHIKELVDDSIINVR.K                 | 3 | 4.90 | 0.45 | -2.06 |
| IPI00411680 | Isoform 1 of Protein-L-isoaspartate(D-aspartate) O-methyltransferase | K.VIGIDHIKELVDDSIINVRKDDPTLLSSGR.V      | 4 | 3.13 | 0.19 | -3.66 |
| IPI00411680 | Isoform 1 of Protein-L-isoaspartate(D-aspartate) O-methyltransferase | R.KDDPTLLSSGR.V                         | 2 | 2.59 | 0.25 | -1.27 |
| IPI00411680 | Isoform 1 of Protein-L-isoaspartate(D-aspartate) O-methyltransferase | R.LILVGPAGGNQM*LEQYDKLQDGSIK.M          | 3 | 2.38 | 0.39 | -2.96 |
| IPI00411680 | Isoform 1 of Protein-L-isoaspartate(D-aspartate) O-methyltransferase | R.LILVGPAGGNQM*LEQYDKLQDGSIK.M          | 4 | 3.91 | 0.34 | -2.36 |
| IPI00411680 | Isoform 1 of Protein-L-isoaspartate(D-aspartate) O-methyltransferase | R.M*GYAEEAPYDAIHVGAAAPVVPQALIDQLKPGGR.L | 3 | 6.33 | 0.56 | -2.89 |
| IPI00411680 | Isoform 1 of Protein-L-isoaspartate(D-aspartate) O-methyltransferase | R.M*GYAEEAPYDAIHVGAAAPVVPQALIDQLKPGGR.L | 4 | 5.06 | 0.37 | -3.75 |
| IPI00411706 | S-formylglutathione hydrolase                                        | K.SVSAPICNPVLCPWGK.K                    | 2 | 3.99 | 0.43 | -2.00 |
| IPI00411706 | S-formylglutathione hydrolase                                        | R.M*YSYVTEELPQLINANFPVDPQR.M            | 3 | 3.87 | 0.32 | -5.18 |
| IPI00412216 | vacuolar protein sorting 13C protein isoform 2B                      | R.LHLM*ASSGKMFKDGSMNVSVK.L              | 2 | 1.87 | 0.20 | 3.17  |
| IPI00412264 | Pleiotrophin precursor                                               | K.KSDCGEWQWSVCVPTSGDCGLGTR.E            | 3 | 5.35 | 0.21 |       |

|             |                                                                                 |                                 |   |      |      |       |
|-------------|---------------------------------------------------------------------------------|---------------------------------|---|------|------|-------|
| IPI00412408 | Breast cancer type 2 susceptibility protein                                     | K.SLLYDHENASTLILTPTSK.D         | 3 | 3.68 | 0.08 |       |
| IPI00412492 | Isoform 1 of Plexin-D1 precursor                                                | K.LFTFDLNPSSDDNLIK.I            | 2 | 2.92 | 0.31 | -4.22 |
| IPI00412492 | Isoform 1 of Plexin-D1 precursor                                                | K.SQVFPLSLQLK.G                 | 2 | 2.09 | 0.22 | -3.10 |
| IPI00412541 | Probable G-protein coupled receptor 158 precursor                               | K.KLYAQLEIYK.R                  | 2 | 2.23 | 0.12 |       |
| IPI00412987 | GMFB protein                                                                    | K.ETNNAIIM*K.I                  | 2 | 2.75 | 0.21 | -2.35 |
| IPI00412987 | GMFB protein                                                                    | K.NKLVQTAELTK.V                 | 2 | 3.03 | 0.17 | -0.79 |
| IPI00412987 | GMFB protein                                                                    | R.LVQTAELTK.V                   | 1 | 1.80 | 0.14 | -2.97 |
| IPI00412987 | GMFB protein                                                                    | R.LVQTAELTK.V                   | 2 | 2.59 | 0.13 | -2.12 |
| IPI00412987 | GMFB protein                                                                    | R.LVVLDEELEGISPDELKDELPER.Q     | 3 | 3.50 | 0.30 | -4.38 |
| IPI00412987 | GMFB protein                                                                    | R.LVVLDEELEGISPDELKDELPERQPR.F  | 3 | 5.02 | 0.51 | -2.14 |
| IPI00412987 | GMFB protein                                                                    | R.LVVLDEELEGISPDELKDELPERQPR.F  | 4 | 3.25 | 0.25 | -2.99 |
| IPI00412988 | Isoform 1 of Netrin-G1 precursor                                                | K.LRDFFTVTDLR.I                 | 3 | 2.82 | 0.11 | -2.59 |
| IPI00412988 | Isoform 1 of Netrin-G1 precursor                                                | R.CLCPAAYTGILCEK.L              | 2 | 4.21 | 0.48 | -3.02 |
| IPI00412988 | Isoform 1 of Netrin-G1 precursor                                                | R.DFFTVTDLR.I                   | 2 | 2.07 | 0.23 | -1.42 |
| IPI00412988 | Isoform 1 of Netrin-G1 precursor                                                | R.FAFFAGPR.L                    | 2 | 2.91 | 0.32 | -1.49 |
| IPI00412988 | Isoform 1 of Netrin-G1 precursor                                                | R.LLRPAVGEIFVDELHLAR.Y          | 2 | 3.37 | 0.36 | -5.15 |
| IPI00412988 | Isoform 1 of Netrin-G1 precursor                                                | R.LLRPAVGEIFVDELHLAR.Y          | 3 | 7.26 | 0.52 | -4.05 |
| IPI00412988 | Isoform 1 of Netrin-G1 precursor                                                | R.LLRPAVGEIFVDELHLAR.Y          | 4 | 4.89 | 0.44 | -4.03 |
| IPI00412988 | Isoform 1 of Netrin-G1 precursor                                                | R.NM*ASLYGQLDTTK.K              | 2 | 3.69 | 0.44 | -5.14 |
| IPI00412988 | Isoform 1 of Netrin-G1 precursor                                                | R.NM*ASLYGQLDTTK.L              | 3 | 1.84 | 0.14 | -0.80 |
| IPI00413344 | Cofilin-2                                                                       | K.QILVGDIGDVTEDPYTSFVK.L        | 2 | 5.30 | 0.52 | -5.18 |
| IPI00413344 | Cofilin-2                                                                       | R.YALYDATYETK.E                 | 2 | 3.27 | 0.30 | -1.92 |
| IPI00413451 | Putative uncharacterized protein DKFZp686I04222                                 | K.GNTAAQM*AQILSFNK.S            | 2 | 4.91 | 0.43 | -3.01 |
| IPI00413451 | Putative uncharacterized protein DKFZp686I04222                                 | K.IAELLSPGSVDPLTR.L             | 2 | 3.11 | 0.31 | -3.82 |
| IPI00413451 | Putative uncharacterized protein DKFZp686I04222                                 | K.SGGGGDIHQGFQSLLEVNKTGTQYLLR.V | 4 | 3.02 | 0.16 | -4.32 |
| IPI00413451 | Putative uncharacterized protein DKFZp686I04222                                 | R.LDM*MDEEEVEVSLPR.F            | 2 | 1.23 | 0.15 | -2.86 |
| IPI00413587 | Isoform 1 of BH3-interacting domain death agonist                               | R.DLATALEQLLQAYPR.D             | 2 | 3.22 | 0.21 | -3.51 |
| IPI00413587 | Isoform 1 of BH3-interacting domain death agonist                               | R.DLATALEQLLQAYPR.D             | 3 | 4.70 | 0.43 | -2.08 |
| IPI00413587 | Isoform 1 of BH3-interacting domain death agonist                               | R.HLAQVGDMS*DR.S                | 3 | 1.95 | 0.14 | -3.98 |
| IPI00413641 | Aldose reductase                                                                | K.REELFIVSK.L                   | 2 | 2.46 | 0.06 | -2.43 |
| IPI00413641 | Aldose reductase                                                                | K.SPPGQVTEAVK.V                 | 2 | 3.13 | 0.13 | -1.12 |
| IPI00413778 | Peptidyl-prolyl cis-trans isomerase                                             | M.GVQVETISPGDGR.T               | 2 | 3.50 | 0.30 | -3.68 |
| IPI00413781 | chemokine (C-X-C motif) ligand 12 (stromal cell-derived factor 1) isoform gamma | K.ILNTPNCALQIVAR.L              | 2 | 3.42 | 0.24 |       |
| IPI00413781 | chemokine (C-X-C motif) ligand 12 (stromal cell-derived factor 1) isoform gamma | R.FFESHVAR.A                    | 2 | 2.60 | 0.14 |       |
| IPI00413826 | similar to H3 histone, family 3B                                                | K.RVTIMPKDIQLAHSIR.G            | 2 | 2.71 | 0.06 |       |
| IPI00413912 | Transmembrane protein 132E precursor                                            | K.SVLATTPVGLR.V                 | 2 | 2.06 | 0.16 | -2.12 |
| IPI00413912 | Transmembrane protein 132E precursor                                            | K.VVSPLTEAVLGETLLTVTEEK.V       | 3 | 4.39 | 0.38 | -4.56 |
| IPI00413912 | Transmembrane protein 132E precursor                                            | R.AVTELTVIQR.D                  | 2 | 3.46 | 0.19 | -2.97 |
| IPI00413912 | Transmembrane protein 132E precursor                                            | R.DYGLLVSSLDEHVATVTQDR.A        | 3 | 3.73 | 0.39 | -3.55 |

|             |                                      |                                          |   |      |      |       |
|-------------|--------------------------------------|------------------------------------------|---|------|------|-------|
| IPI00413912 | Transmembrane protein 132E precursor | R.GHGALPDLER.A                           | 2 | 2.62 | 0.25 | -2.16 |
| IPI00413959 | Calsyntenin-1 precursor              | D.PPLIALDKDAPLR.F                        | 2 | 3.96 | 0.32 | -4.13 |
| IPI00413959 | Calsyntenin-1 precursor              | D.PPLIALDKDAPLR.F                        | 3 | 3.80 | 0.38 | -2.57 |
| IPI00413959 | Calsyntenin-1 precursor              | I.PDGVVSVSPK.E                           | 2 | 3.32 | 0.40 | -1.49 |
| IPI00413959 | Calsyntenin-1 precursor              | K.AM*QHISYLNSR.Q                         | 2 | 3.52 | 0.37 | -3.84 |
| IPI00413959 | Calsyntenin-1 precursor              | K.AM*QHISYLNSR.Q                         | 3 | 4.15 | 0.31 | -4.11 |
| IPI00413959 | Calsyntenin-1 precursor              | K.ATVHIQVNDVNEYAPVFK.E                   | 2 | 5.28 | 0.56 | -4.37 |
| IPI00413959 | Calsyntenin-1 precursor              | K.ATVHIQVNDVNEYAPVFK.E                   | 3 | 5.17 | 0.35 | -5.40 |
| IPI00413959 | Calsyntenin-1 precursor              | K.ATVHIQVNDVNEYAPVFK.E.S                 | 2 | 5.80 | 0.50 | -5.13 |
| IPI00413959 | Calsyntenin-1 precursor              | K.ATVHIQVNDVNEYAPVFK.E.S                 | 3 | 5.92 | 0.45 | -4.24 |
| IPI00413959 | Calsyntenin-1 precursor              | K.ATVHIQVNDVNEYAPVFK.E.S                 | 4 | 4.80 | 0.36 | -3.41 |
| IPI00413959 | Calsyntenin-1 precursor              | K.CFNEATCISVPPVDGYVM*VLQPEEPK.I          | 3 | 2.47 | 0.07 | -4.61 |
| IPI00413959 | Calsyntenin-1 precursor              | K.CSELNGR.Y                              | 1 | 1.91 | 0.16 | -1.88 |
| IPI00413959 | Calsyntenin-1 precursor              | K.DYSFTIQAYDCGK.G                        | 2 | 4.68 | 0.55 | -4.60 |
| IPI00413959 | Calsyntenin-1 precursor              | K.DYSFTIQAYDCGKGPDTNVKK.S                | 3 | 4.02 | 0.42 | -0.92 |
| IPI00413959 | Calsyntenin-1 precursor              | K.DYSFTIQAYDCGKGPDTNVKK.S                | 4 | 2.73 | 0.35 | -1.21 |
| IPI00413959 | Calsyntenin-1 precursor              | K.EGLDLQVLEDSGR.G                        | 1 | 1.82 | 0.18 | -2.66 |
| IPI00413959 | Calsyntenin-1 precursor              | K.EGLDLQVLEDSGR.G                        | 2 | 4.86 | 0.49 | -5.86 |
| IPI00413959 | Calsyntenin-1 precursor              | K.EPFTISVWM*R.H                          | 2 | 2.39 | 0.35 | -4.43 |
| IPI00413959 | Calsyntenin-1 precursor              | K.ETILCSSDKTDM*NR.H                      | 2 | 3.90 | 0.45 | -1.66 |
| IPI00413959 | Calsyntenin-1 precursor              | K.ETILCSSDKTDM*NR.H                      | 3 | 3.03 | 0.39 | -0.98 |
| IPI00413959 | Calsyntenin-1 precursor              | K.FKLICSELNGR.Y                          | 3 | 3.78 | 0.17 | -1.61 |
| IPI00413959 | Calsyntenin-1 precursor              | K.GIEVSSSELGM*TFTGVDTM*ASYEEVLHLLR.Y     | 3 | 3.83 | 0.30 | -3.11 |
| IPI00413959 | Calsyntenin-1 precursor              | K.HKPWLEPTYHGIVTENDNTVLLDPPLIALDKDAPLR.F | 4 | 3.99 | 0.34 | -4.34 |
| IPI00413959 | Calsyntenin-1 precursor              | K.IHGQNVPFDAVVVDK.S                      | 2 | 4.98 | 0.50 | -3.62 |
| IPI00413959 | Calsyntenin-1 precursor              | K.IHGQNVPFDAVVVDK.S                      | 3 | 3.29 | 0.29 | -2.93 |
| IPI00413959 | Calsyntenin-1 precursor              | K.IHGQNVPFDAVVVDKSTGEGVIR.S              | 2 | 5.01 | 0.53 | -4.89 |
| IPI00413959 | Calsyntenin-1 precursor              | K.IHGQNVPFDAVVVDKSTGEGVIR.S              | 3 | 5.74 | 0.52 | -5.05 |
| IPI00413959 | Calsyntenin-1 precursor              | K.IHGQNVPFDAVVVDKSTGEGVIR.S              | 4 | 4.24 | 0.43 | -5.46 |
| IPI00413959 | Calsyntenin-1 precursor              | K.ISLSGVHFFAR.A                          | 2 | 3.16 | 0.25 | -2.13 |
| IPI00413959 | Calsyntenin-1 precursor              | K.LICSELNGR.Y                            | 1 | 2.35 | 0.29 | -2.78 |
| IPI00413959 | Calsyntenin-1 precursor              | K.LICSELNGR.Y                            | 2 | 2.51 | 0.22 | 2.09  |
| IPI00413959 | Calsyntenin-1 precursor              | K.LNYGKEHQYK.L                           | 1 | 2.45 | 0.27 | -6.29 |
| IPI00413959 | Calsyntenin-1 precursor              | K.LNYGKEHQYK.L                           | 2 | 3.53 | 0.36 | -4.17 |
| IPI00413959 | Calsyntenin-1 precursor              | K.LTVTAYDCGK.K                           | 1 | 2.13 | 0.40 | -3.69 |
| IPI00413959 | Calsyntenin-1 precursor              | K.LTVTAYDCGK.K                           | 2 | 3.72 | 0.35 | -2.63 |
| IPI00413959 | Calsyntenin-1 precursor              | K.LTVTAYDCGKK.R                          | 2 | 2.44 | 0.21 |       |
| IPI00413959 | Calsyntenin-1 precursor              | K.NTEKLNYGK.E                            | 1 | 2.52 | 0.17 | -2.09 |
| IPI00413959 | Calsyntenin-1 precursor              | K.NTEKLNYGK.E                            | 2 | 2.87 | 0.30 | -1.43 |
| IPI00413959 | Calsyntenin-1 precursor              | K.NTEKLNYGKEHQYK.L                       | 2 | 3.65 | 0.38 | -4.44 |
| IPI00413959 | Calsyntenin-1 precursor              | K.NTEKLNYGKEHQYK.L                       | 3 | 2.92 | 0.23 | -3.48 |
| IPI00413959 | Calsyntenin-1 precursor              | K.RATEDVLVK.I                            | 2 | 2.42 | 0.09 | -0.67 |

|             |                         |                                               |   |      |      |       |
|-------------|-------------------------|-----------------------------------------------|---|------|------|-------|
| IPI00413959 | Calsyntenin-1 precursor | K.STGEGVIR.S                                  | 1 | 1.48 | 0.05 | -2.72 |
| IPI00413959 | Calsyntenin-1 precursor | K.STGEGVIR.S                                  | 2 | 2.16 | 0.07 | -2.74 |
| IPI00413959 | Calsyntenin-1 precursor | K.SYKATVIEGK.Q                                | 1 | 2.51 | 0.07 | -1.49 |
| IPI00413959 | Calsyntenin-1 precursor | K.SYKATVIEGK.Q                                | 2 | 2.66 | 0.17 | -3.09 |
| IPI00413959 | Calsyntenin-1 precursor | K.VEVNVIHTANPM*EHANH.M                        | 2 | 4.80 | 0.54 | -3.09 |
| IPI00413959 | Calsyntenin-1 precursor | K.VIDCLYTCK.E                                 | 1 | 2.08 | 0.21 | -3.75 |
| IPI00413959 | Calsyntenin-1 precursor | K.VIDCLYTCK.E                                 | 2 | 3.65 | 0.36 | -3.48 |
| IPI00413959 | Calsyntenin-1 precursor | K.VIDCLYTCKEGLDLQVLEDSGR.G                    | 2 | 4.80 | 0.45 | -4.58 |
| IPI00413959 | Calsyntenin-1 precursor | K.VIDCLYTCKEGLDLQVLEDSGR.G                    | 3 | 5.50 | 0.46 | -2.92 |
| IPI00413959 | Calsyntenin-1 precursor | M.AAQPFVHPEHR.S                               | 2 | 3.19 | 0.37 | -4.60 |
| IPI00413959 | Calsyntenin-1 precursor | P.DGVVSVSPKEPFTISVWM*R.H                      | 2 | 3.29 | 0.26 | -4.51 |
| IPI00413959 | Calsyntenin-1 precursor | P.DGVVSVSPKEPFTISVWM*R.H                      | 3 | 3.93 | 0.41 | -1.89 |
| IPI00413959 | Calsyntenin-1 precursor | Q.PQFVHPEHR.S                                 | 2 | 2.92 | 0.32 | -3.59 |
| IPI00413959 | Calsyntenin-1 precursor | R.AASEFESSEGVFLFPELR.I                        | 2 | 4.71 | 0.45 | -8.90 |
| IPI00413959 | Calsyntenin-1 precursor | R.AASEFESSEGVFLFPELR.I                        | 3 | 5.03 | 0.31 | -4.67 |
| IPI00413959 | Calsyntenin-1 precursor | R.ATEDVLVK.I                                  | 1 | 2.30 | 0.10 | -2.76 |
| IPI00413959 | Calsyntenin-1 precursor | R.ATEDVLVK.I                                  | 2 | 2.79 | 0.10 | -2.54 |
| IPI00413959 | Calsyntenin-1 precursor | R.GNLAGLTLR.S                                 | 1 | 1.65 | 0.11 | -1.41 |
| IPI00413959 | Calsyntenin-1 precursor | R.GNLAGLTLR.S                                 | 2 | 3.34 | 0.37 | -2.13 |
| IPI00413959 | Calsyntenin-1 precursor | R.GVQIAHPSQLVLTLEGEDLGELDK.A                  | 2 | 5.85 | 0.47 | -2.90 |
| IPI00413959 | Calsyntenin-1 precursor | R.GVQIAHPSQLVLTLEGEDLGELDK.A                  | 3 | 6.12 | 0.40 | -5.09 |
| IPI00413959 | Calsyntenin-1 precursor | R.GVQIAHPSQLVLTLEGEDLGELDK.A                  | 4 | 5.78 | 0.39 | -2.81 |
| IPI00413959 | Calsyntenin-1 precursor | R.GVQIAHPSQLVLTLEGEDLGELDKAM*QHISYLNRSR.Q     | 3 | 4.69 | 0.55 | -3.96 |
| IPI00413959 | Calsyntenin-1 precursor | R.GVQIAHPSQLVLTLEGEDLGELDKAM*QHISYLNRSR.Q     | 4 | 8.33 | 0.54 | -6.93 |
| IPI00413959 | Calsyntenin-1 precursor | R.GVQIAHPSQLVLTLEGEDLGELDKAM*QHISYLNRSR.Q     | 5 | 4.44 | 0.43 | -5.15 |
| IPI00413959 | Calsyntenin-1 precursor | R.IEYEPGTGALAVFPNIHLETCDPEVASVQATVELETSHIGK.G | 4 | 3.22 | 0.21 | -3.28 |
| IPI00413959 | Calsyntenin-1 precursor | R.IPDGVVSVSPK.E                               | 1 | 2.03 | 0.33 | -3.87 |
| IPI00413959 | Calsyntenin-1 precursor | R.IPDGVVSVSPK.E                               | 2 | 3.14 | 0.38 | -2.96 |
| IPI00413959 | Calsyntenin-1 precursor | R.IPDGVVSVSPKEPF.T                            | 2 | 4.05 | 0.47 | -2.64 |
| IPI00413959 | Calsyntenin-1 precursor | R.IPDGVVSVSPKEPFTISVWM*R.H                    | 3 | 4.68 | 0.55 | -3.17 |
| IPI00413959 | Calsyntenin-1 precursor | R.LIFLFRQDPSEEKK.Y                            | 2 | 2.48 | 0.10 | -2.58 |
| IPI00413959 | Calsyntenin-1 precursor | R.LIFLFRQDPSEEKK.Y                            | 3 | 3.12 | 0.18 | -2.10 |
| IPI00413959 | Calsyntenin-1 precursor | R.LKITSTIK.C                                  | 1 | 2.09 | 0.21 | -4.13 |
| IPI00413959 | Calsyntenin-1 precursor | R.SFVDLSGHNLANPHPF.A                          | 2 | 4.17 | 0.48 | -3.37 |
| IPI00413959 | Calsyntenin-1 precursor | R.SFVDLSGHNLANPHPF.A                          | 3 | 4.84 | 0.50 | -2.07 |
| IPI00413959 | Calsyntenin-1 precursor | R.SFVDLSGHNLANPHPFVVPSTA.T                    | 2 | 4.47 | 0.57 | -3.64 |
| IPI00413959 | Calsyntenin-1 precursor | R.SFVDLSGHNLANPHPFVVPSTAT.V                   | 2 | 4.76 | 0.52 | -4.11 |
| IPI00413959 | Calsyntenin-1 precursor | R.SFVDLSGHNLANPHPFVVPSTATV.V                  | 2 | 5.00 | 0.54 | -3.24 |
| IPI00413959 | Calsyntenin-1 precursor | R.SFVDLSGHNLANPHPFVVPSTATVV.I                 | 2 | 3.98 | 0.37 | -2.45 |
| IPI00413959 | Calsyntenin-1 precursor | R.SFVDLSGHNLANPHPFVVPSTATVVI.V                | 2 | 4.17 | 0.38 | -2.51 |
| IPI00413959 | Calsyntenin-1 precursor | R.VEAVDADCSPQFSQICSYEIITPDVPFTVDKDGYYK.N      | 3 | 5.78 | 0.61 | -3.95 |
| IPI00413959 | Calsyntenin-1 precursor | R.VEAVDADCSPQFSQICSYEIITPDVPFTVDKDGYYK.N      | 4 | 4.54 | 0.37 | -3.84 |

|             |                                         |                                             |   |      |      |       |
|-------------|-----------------------------------------|---------------------------------------------|---|------|------|-------|
| IPI00413959 | Calsyntenin-1 precursor                 | R.VEAVDADCSPQFSQICSYEIITPDVPFTVDKDGVIKNTK.L | 4 | 5.79 | 0.35 | -2.78 |
| IPI00413959 | Calsyntenin-1 precursor                 | R.YISNEFK.V                                 | 1 | 2.32 | 0.12 | -1.62 |
| IPI00413959 | Calsyntenin-1 precursor                 | V.PFDVVVDK.S                                | 1 | 2.67 | 0.19 | -5.98 |
| IPI00413959 | Calsyntenin-1 precursor                 | V.PFDVVVDK.S                                | 2 | 3.54 | 0.24 | -1.24 |
| IPI00413959 | Calsyntenin-1 precursor                 | W.LEPTYHGIVTENDNTVLLDPPLIALDK.D             | 3 | 4.10 | 0.29 | -4.31 |
| IPI00413959 | Calsyntenin-1 precursor                 | W.LEPTYHGIVTENDNTVLLDPPLIALDKDAPLR.F        | 3 | 6.13 | 0.53 | -4.49 |
| IPI00413959 | Calsyntenin-1 precursor                 | W.LEPTYHGIVTENDNTVLLDPPLIALDKDAPLR.F        | 4 | 4.50 | 0.42 | -3.77 |
| IPI00414249 | Isoform 1 of Neurexin-3-alpha precursor | A.PGLGDFLQLHIEQK.I                          | 2 | 3.08 | 0.35 | -4.17 |
| IPI00414249 | Isoform 1 of Neurexin-3-alpha precursor | G.LEFM*GLPNQWAR.Y                           | 2 | 4.31 | 0.34 | -3.18 |
| IPI00414249 | Isoform 1 of Neurexin-3-alpha precursor | K.AREENVATFR.G                              | 2 | 3.72 | 0.23 | -2.99 |
| IPI00414249 | Isoform 1 of Neurexin-3-alpha precursor | K.CENVATLDPINFETPEAYISLPK.W                 | 2 | 5.59 | 0.47 | -5.72 |
| IPI00414249 | Isoform 1 of Neurexin-3-alpha precursor | K.DFRPNKVSETSR.T                            | 2 | 1.82 | 0.13 | -2.89 |
| IPI00414249 | Isoform 1 of Neurexin-3-alpha precursor | K.DGAVSLVINLGGGAFAIVPVNGK.F                 | 3 | 3.16 | 0.21 | -6.08 |
| IPI00414249 | Isoform 1 of Neurexin-3-alpha precursor | K.EVVYKNNDIR.L                              | 2 | 2.17 | 0.11 | -0.62 |
| IPI00414249 | Isoform 1 of Neurexin-3-alpha precursor | K.EVVYKNNDIR.L                              | 3 | 2.10 | 0.14 | -2.04 |
| IPI00414249 | Isoform 1 of Neurexin-3-alpha precursor | K.GDLYM*AGLAQGM*YSNLPK.L                    | 2 | 5.40 | 0.57 | -3.13 |
| IPI00414249 | Isoform 1 of Neurexin-3-alpha precursor | K.GDLYM*AGLAQGM*YSNLPK.L                    | 3 | 3.88 | 0.45 | -2.41 |
| IPI00414249 | Isoform 1 of Neurexin-3-alpha precursor | K.GPETLYAGQK.L                              | 1 | 2.11 | 0.26 | -1.68 |
| IPI00414249 | Isoform 1 of Neurexin-3-alpha precursor | K.GPETLYAGQK.L                              | 2 | 2.94 | 0.21 | 0.06  |
| IPI00414249 | Isoform 1 of Neurexin-3-alpha precursor | K.GRLFQGQLSGLYYDGLK.V                       | 3 | 4.55 | 0.43 | -3.36 |
| IPI00414249 | Isoform 1 of Neurexin-3-alpha precursor | K.GYIHYVFDLGNPNVIK.G                        | 2 | 4.55 | 0.44 | -1.43 |
| IPI00414249 | Isoform 1 of Neurexin-3-alpha precursor | K.GYIHYVFDLGNPNVIK.G                        | 3 | 3.88 | 0.22 | -3.69 |
| IPI00414249 | Isoform 1 of Neurexin-3-alpha precursor | K.IIM*PM*VM*HTEAEDVSFR.F                    | 2 | 4.07 | 0.50 | -3.30 |
| IPI00414249 | Isoform 1 of Neurexin-3-alpha precursor | K.IIM*PM*VM*HTEAEDVSFR.F                    | 3 | 2.09 | 0.32 | -2.29 |
| IPI00414249 | Isoform 1 of Neurexin-3-alpha precursor | K.IYGEVVK.C                                 | 1 | 2.06 | 0.22 | -2.31 |
| IPI00414249 | Isoform 1 of Neurexin-3-alpha precursor | K.IYGEVVK.C                                 | 2 | 1.55 | 0.06 | -1.54 |
| IPI00414249 | Isoform 1 of Neurexin-3-alpha precursor | K.LCSEDVSDPGLSH.L                           | 2 | 4.45 | 0.58 | -5.24 |
| IPI00414249 | Isoform 1 of Neurexin-3-alpha precursor | K.LCSEDVSDPGLSHLM*.M                        | 2 | 4.70 | 0.52 | -3.39 |
| IPI00414249 | Isoform 1 of Neurexin-3-alpha precursor | K.LCSEDVSDPGLSHLM*MS.E                      | 2 | 5.11 | 0.52 | -4.39 |
| IPI00414249 | Isoform 1 of Neurexin-3-alpha precursor | K.LM*VNLDICR.I                              | 2 | 3.24 | 0.18 | -1.80 |
| IPI00414249 | Isoform 1 of Neurexin-3-alpha precursor | K.NLDLKGDLYM*AGLAQGM*YSNLPK.L               | 2 | 4.64 | 0.51 | -3.72 |
| IPI00414249 | Isoform 1 of Neurexin-3-alpha precursor | K.NLDLKGDLYM*AGLAQGM*YSNLPK.L               | 3 | 5.76 | 0.43 | -3.66 |
| IPI00414249 | Isoform 1 of Neurexin-3-alpha precursor | K.SADYVNLALK.D                              | 1 | 2.35 | 0.24 | -3.84 |
| IPI00414249 | Isoform 1 of Neurexin-3-alpha precursor | K.SADYVNLALK.D                              | 2 | 3.96 | 0.37 | -1.89 |
| IPI00414249 | Isoform 1 of Neurexin-3-alpha precursor | K.SGGLILYTPANDRPSTR.S                       | 2 | 2.76 | 0.21 | -3.81 |
| IPI00414249 | Isoform 1 of Neurexin-3-alpha precursor | K.SGGLILYTPANDRPSTR.S                       | 3 | 2.88 | 0.35 | -3.79 |
| IPI00414249 | Isoform 1 of Neurexin-3-alpha precursor | K.TTSPDGFILFNSGDGNDFIARELVK.G               | 2 | 4.16 | 0.50 | -4.19 |
| IPI00414249 | Isoform 1 of Neurexin-3-alpha precursor | K.TTSPDGFILFNSGDGNDFIARELVK.G               | 3 | 3.53 | 0.34 | -4.27 |
| IPI00414249 | Isoform 1 of Neurexin-3-alpha precursor | K.VLNM*AAENPNIK.I                           | 2 | 4.53 | 0.36 | -2.56 |
| IPI00414249 | Isoform 1 of Neurexin-3-alpha precursor | K.VLNM*AAENPNIK.I                           | 3 | 3.80 | 0.23 | -0.76 |
| IPI00414249 | Isoform 1 of Neurexin-3-alpha precursor | K.VVTQVINGAK.N                              | 1 | 2.30 | 0.15 | -1.44 |
| IPI00414249 | Isoform 1 of Neurexin-3-alpha precursor | K.VVTQVINGAK.N                              | 2 | 2.99 | 0.14 | -2.87 |



|             |                                         |                                               |   |      |      |       |
|-------------|-----------------------------------------|-----------------------------------------------|---|------|------|-------|
| IPI00414249 | Isoform 1 of Neurexin-3-alpha precursor | K.YGNSEPR.L                                   | 2 | 1.92 | 0.25 | -1.41 |
| IPI00414249 | Isoform 1 of Neurexin-3-alpha precursor | R.AYGLLVATTSR.D                               | 1 | 2.21 | 0.33 | -3.49 |
| IPI00414249 | Isoform 1 of Neurexin-3-alpha precursor | R.AYGLLVATTSR.D                               | 2 | 4.29 | 0.40 | -3.80 |
| IPI00414249 | Isoform 1 of Neurexin-3-alpha precursor | R.DGFQGLASVDLNGR.L                            | 2 | 4.89 | 0.57 | -5.11 |
| IPI00414249 | Isoform 1 of Neurexin-3-alpha precursor | R.DGFQGLASVDLNGRPLDINDALHR.S                  | 3 | 5.12 | 0.47 | -2.78 |
| IPI00414249 | Isoform 1 of Neurexin-3-alpha precursor | R.DLFIDGR.S                                   | 1 | 2.11 | 0.13 | -1.89 |
| IPI00414249 | Isoform 1 of Neurexin-3-alpha precursor | R.DNSNTHSLKVDTK.V                             | 2 | 3.62 | 0.42 | -3.87 |
| IPI00414249 | Isoform 1 of Neurexin-3-alpha precursor | R.DSADTLRLELDGGR.V                            | 3 | 2.60 | 0.27 | -2.05 |
| IPI00414249 | Isoform 1 of Neurexin-3-alpha precursor | R.DSADTLRLELDGGRVK.L                          | 3 | 4.11 | 0.27 | -1.81 |
| IPI00414249 | Isoform 1 of Neurexin-3-alpha precursor | R.EASILSYDGSM*YM*K.I                          | 2 | 4.21 | 0.13 | -1.99 |
| IPI00414249 | Isoform 1 of Neurexin-3-alpha precursor | R.EENVATFR.G                                  | 1 | 2.23 | 0.18 | -3.61 |
| IPI00414249 | Isoform 1 of Neurexin-3-alpha precursor | R.EENVATFR.G                                  | 2 | 2.00 | 0.23 | -3.05 |
| IPI00414249 | Isoform 1 of Neurexin-3-alpha precursor | R.FSM*DCAETAVLSNK.Q                           | 2 | 4.81 | 0.52 | -4.57 |
| IPI00414249 | Isoform 1 of Neurexin-3-alpha precursor | R.FSM*DCAETAVLSNK.Q                           | 3 | 2.84 | 0.28 | -3.73 |
| IPI00414249 | Isoform 1 of Neurexin-3-alpha precursor | R.GSEYLCYDLSQNPIQSSSDEITLSFK.T                | 2 | 4.47 | 0.54 | -4.80 |
| IPI00414249 | Isoform 1 of Neurexin-3-alpha precursor | R.GVQM*DAEGPCGERPCENGGICFLLDGHPTCDCSTTGYGGK.L | 4 | 4.67 | 0.45 | -2.22 |
| IPI00414249 | Isoform 1 of Neurexin-3-alpha precursor | R.IDSAPGLGDFLQLHIEQKG.I                       | 2 | 5.03 | 0.43 | -2.90 |
| IPI00414249 | Isoform 1 of Neurexin-3-alpha precursor | R.IDSAPGLGDFLQLHIEQKG.I                       | 3 | 2.74 | 0.34 | -3.15 |
| IPI00414249 | Isoform 1 of Neurexin-3-alpha precursor | R.LAVGFSTTVK.D                                | 2 | 2.73 | 0.28 | -1.95 |
| IPI00414249 | Isoform 1 of Neurexin-3-alpha precursor | R.LAVGFSTTVKDGILVR.I                          | 3 | 2.19 | 0.19 | -2.27 |
| IPI00414249 | Isoform 1 of Neurexin-3-alpha precursor | R.LEFHNIETGIM*TEK.R                           | 2 | 4.01 | 0.36 | -2.47 |
| IPI00414249 | Isoform 1 of Neurexin-3-alpha precursor | R.LEFHNIETGIM*TEK.R                           | 3 | 3.67 | 0.33 | -3.05 |
| IPI00414249 | Isoform 1 of Neurexin-3-alpha precursor | R.LEFHNIETGIM*TEKR.Y                          | 2 | 3.67 | 0.38 | -3.02 |
| IPI00414249 | Isoform 1 of Neurexin-3-alpha precursor | R.LEFHNIETGIM*TEKR.Y                          | 3 | 3.74 | 0.43 | -2.30 |
| IPI00414249 | Isoform 1 of Neurexin-3-alpha precursor | R.LFQGQLSGLYYDGLK.V                           | 2 | 5.21 | 0.39 | -6.20 |
| IPI00414249 | Isoform 1 of Neurexin-3-alpha precursor | R.LFQGQLSGLYYDGLK.V                           | 3 | 4.24 | 0.36 | -3.34 |
| IPI00414249 | Isoform 1 of Neurexin-3-alpha precursor | R.LPDLINDALHR.S                               | 2 | 3.78 | 0.36 | -2.41 |
| IPI00414249 | Isoform 1 of Neurexin-3-alpha precursor | R.LPDLINDALHR.S                               | 3 | 4.14 | 0.33 | -2.11 |
| IPI00414249 | Isoform 1 of Neurexin-3-alpha precursor | R.M*GSISFDFR.T                                | 1 | 1.31 | 0.22 | -3.10 |
| IPI00414249 | Isoform 1 of Neurexin-3-alpha precursor | R.M*GSISFDFR.T                                | 2 | 3.82 | 0.38 | -2.50 |
| IPI00414249 | Isoform 1 of Neurexin-3-alpha precursor | R.NGLILHTGK.S                                 | 1 | 2.65 | 0.14 | -3.65 |
| IPI00414249 | Isoform 1 of Neurexin-3-alpha precursor | R.NGLILHTGK.S                                 | 2 | 2.77 | 0.15 | -1.89 |
| IPI00414249 | Isoform 1 of Neurexin-3-alpha precursor | R.NIIADPVTFK.T                                | 1 | 2.97 | 0.31 | -2.13 |
| IPI00414249 | Isoform 1 of Neurexin-3-alpha precursor | R.NIIADPVTFK.T                                | 2 | 2.61 | 0.15 | -2.52 |
| IPI00414249 | Isoform 1 of Neurexin-3-alpha precursor | R.QLAEM*QNAAGVK.S                             | 1 | 1.24 | 0.11 | -2.06 |
| IPI00414249 | Isoform 1 of Neurexin-3-alpha precursor | R.QLAEM*QNAAGVK.S                             | 2 | 2.93 | 0.37 | -3.09 |
| IPI00414249 | Isoform 1 of Neurexin-3-alpha precursor | R.QLTIFNTQAQIAIGGK.D                          | 2 | 4.62 | 0.44 | -6.95 |
| IPI00414249 | Isoform 1 of Neurexin-3-alpha precursor | R.QLTIFNTQAQIAIGGKDK.G                        | 3 | 2.53 | 0.33 | -4.21 |
| IPI00414249 | Isoform 1 of Neurexin-3-alpha precursor | R.RTPFTASGESEILDLEGDM*YLGGLPENR.A             | 3 | 3.70 | 0.29 | -1.88 |
| IPI00414249 | Isoform 1 of Neurexin-3-alpha precursor | R.SDLSFQFK.T                                  | 1 | 2.63 | 0.17 | -2.25 |
| IPI00414249 | Isoform 1 of Neurexin-3-alpha precursor | R.SDLSFQFK.T                                  | 2 | 2.55 | 0.09 | -2.93 |
| IPI00414249 | Isoform 1 of Neurexin-3-alpha precursor | R.SGTISVNSR.R                                 | 1 | 2.12 | 0.18 | -1.75 |

|             |                                         |                                   |   |      |      |       |
|-------------|-----------------------------------------|-----------------------------------|---|------|------|-------|
| IPI00414249 | Isoform 1 of Neurexin-3-alpha precursor | R.SGTISVNSR.R                     | 2 | 2.13 | 0.07 | -0.95 |
| IPI00414249 | Isoform 1 of Neurexin-3-alpha precursor | R.TPFTASGESEILDLEGDM*YLGGLPENR.A  | 2 | 4.48 | 0.55 | -4.54 |
| IPI00414249 | Isoform 1 of Neurexin-3-alpha precursor | R.TPFTASGESEILDLEGDM*YLGGLPENR.A  | 3 | 4.09 | 0.37 | -4.17 |
| IPI00414249 | Isoform 1 of Neurexin-3-alpha precursor | R.TPVNDGKYHVVR.F                  | 2 | 3.84 | 0.11 | -4.34 |
| IPI00414249 | Isoform 1 of Neurexin-3-alpha precursor | R.TTEPNGLILFTHGKPQER.K            | 2 | 3.21 | 0.37 | -3.92 |
| IPI00414249 | Isoform 1 of Neurexin-3-alpha precursor | R.TTEPNGLILFTHGKPQER.K            | 3 | 2.43 | 0.09 | -0.33 |
| IPI00414249 | Isoform 1 of Neurexin-3-alpha precursor | R.TTEPNGLILFTHGKPQER.K            | 4 | 3.21 | 0.32 | -0.66 |
| IPI00414249 | Isoform 1 of Neurexin-3-alpha precursor | R.VPGASEVIR.E                     | 2 | 1.86 | 0.06 | -2.21 |
| IPI00414249 | Isoform 1 of Neurexin-3-alpha precursor | S.EQAREENVATFR.G                  | 2 | 3.29 | 0.31 | -3.60 |
| IPI00414294 | hypothetical protein                    | R.LAQASCSDNYDTPR.W                | 2 | 4.22 | 0.53 | -3.12 |
| IPI00414294 | hypothetical protein                    | R.TGPAGGAGAAAR.A                  | 2 | 3.10 | 0.38 | -1.44 |
| IPI00414320 | Annexin A11                             | R.DAQELYAAGENR.L                  | 2 | 3.57 | 0.34 | -2.68 |
| IPI00414467 | collectin sub-family member 12          | K.CYFYSVEK.E                      | 1 | 1.81 | 0.23 | -3.04 |
| IPI00414467 | collectin sub-family member 12          | K.CYFYSVEK.E                      | 2 | 2.13 | 0.24 | 0.21  |
| IPI00414467 | collectin sub-family member 12          | K.EIFEDAK.L                       | 2 | 1.93 | 0.12 | -3.49 |
| IPI00414467 | collectin sub-family member 12          | K.LFCEDKSSHLVFINTR.E              | 3 | 4.63 | 0.38 | -4.05 |
| IPI00414467 | collectin sub-family member 12          | K.LFCEDKSSHLVFINTR.E              | 4 | 3.26 | 0.37 | -2.58 |
| IPI00414467 | collectin sub-family member 12          | K.SSHLVFINTR.E                    | 1 | 2.55 | 0.24 | -4.09 |
| IPI00414467 | collectin sub-family member 12          | K.SSHLVFINTR.E                    | 2 | 2.82 | 0.22 | -3.56 |
| IPI00414467 | collectin sub-family member 12          | K.WLDGTSPDYK.N                    | 2 | 2.35 | 0.27 | -3.52 |
| IPI00414481 | GTF3C1 protein                          | R.TIKQESGRAGVRPSSSGSAWEACSEAPSK.G | 3 | 2.97 | 0.07 | -4.68 |
| IPI00414676 | Heat shock protein HSP 90-beta          | K.DLVVLLFETALLSSGFLEDPQTHSNR.I    | 3 | 4.66 | 0.53 | -4.51 |
| IPI00414676 | Heat shock protein HSP 90-beta          | K.YIDQEELNK.T                     | 2 | 3.04 | 0.15 | -2.82 |
| IPI00414676 | Heat shock protein HSP 90-beta          | R.DNSTM*GYM*M*AK.K                | 2 | 2.95 | 0.41 | -2.80 |
| IPI00414717 | golgi apparatus protein 1               | K.ADIFVDPVLHTACALDIK.H            | 3 | 3.51 | 0.33 | -3.36 |
| IPI00414717 | golgi apparatus protein 1               | R.FCENTQAGEGR.V                   | 2 | 3.45 | 0.39 | -2.07 |
| IPI00414717 | golgi apparatus protein 1               | R.LLELQYFISR.D                    | 2 | 3.39 | 0.24 | -3.21 |
| IPI00414717 | golgi apparatus protein 1               | R.VAELSSDDFHLDR.H                 | 2 | 4.26 | 0.40 | -3.09 |
| IPI00414717 | golgi apparatus protein 1               | R.VAELSSDDFHLDR.H                 | 3 | 2.65 | 0.20 | -1.79 |
| IPI00414896 | Isoform 1 of Ribonuclease T2 precursor  | K.LGIKPSINYQVADFK.D               | 2 | 4.03 | 0.43 | -4.20 |
| IPI00414896 | Isoform 1 of Ribonuclease T2 precursor  | K.LGIKPSINYQVADFK.D               | 3 | 5.64 | 0.42 | -1.98 |
| IPI00414896 | Isoform 1 of Ribonuclease T2 precursor  | K.LGIKPSINYQVADFKDALAR.V          | 2 | 5.49 | 0.60 | -4.60 |
| IPI00414896 | Isoform 1 of Ribonuclease T2 precursor  | K.LGIKPSINYQVADFKDALAR.V          | 3 | 5.34 | 0.54 | -4.06 |
| IPI00414896 | Isoform 1 of Ribonuclease T2 precursor  | K.LGIKPSINYQVADFKDALAR.V          | 4 | 5.22 | 0.37 | -6.77 |
| IPI00414896 | Isoform 1 of Ribonuclease T2 precursor  | K.QEVWLANGAAESR.G                 | 2 | 3.43 | 0.36 | -3.11 |
| IPI00414896 | Isoform 1 of Ribonuclease T2 precursor  | R.ELDLNSVLLK.L                    | 1 | 2.46 | 0.14 | -1.00 |
| IPI00414896 | Isoform 1 of Ribonuclease T2 precursor  | R.ELDLNSVLLK.L                    | 2 | 2.81 | 0.12 | -3.59 |
| IPI00414896 | Isoform 1 of Ribonuclease T2 precursor  | R.SLELYRELDLNSVLLK.L              | 3 | 3.49 | 0.20 | -1.97 |
| IPI00414896 | Isoform 1 of Ribonuclease T2 precursor  | R.VCEDGPFVYPPPK.K                 | 2 | 3.28 | 0.38 | -3.98 |
| IPI00414896 | Isoform 1 of Ribonuclease T2 precursor  | R.VYGVIPK.I                       | 1 | 2.01 | 0.11 | -2.76 |
| IPI00414896 | Isoform 1 of Ribonuclease T2 precursor  | W.LANGAAESR.G                     | 2 | 3.01 | 0.23 | -3.23 |
| IPI00414896 | Isoform 1 of Ribonuclease T2 precursor  | W.PFNLEEIKDLLPEM*R.A              | 2 | 3.54 | 0.40 | -2.12 |

|             |                                                        |                                     |   |      |      |       |
|-------------|--------------------------------------------------------|-------------------------------------|---|------|------|-------|
| IPI00414896 | Isoform 1 of Ribonuclease T2 precursor                 | W.PFNLEEIKDLLPEM*R.A                | 3 | 4.90 | 0.32 | -2.97 |
| IPI00414909 | Alpha-N-acetylgalactosaminidase precursor              | K.ASALVFFSCR.T                      | 2 | 2.87 | 0.19 | -0.62 |
| IPI00414909 | Alpha-N-acetylgalactosaminidase precursor              | K.INQDPLGIQGR.R                     | 2 | 3.48 | 0.34 | -3.26 |
| IPI00414909 | Alpha-N-acetylgalactosaminidase precursor              | R.AQM*ALWTVLAAPLLM*STDLR.T          | 3 | 4.97 | 0.43 | -5.17 |
| IPI00414909 | Alpha-N-acetylgalactosaminidase precursor              | R.TIS AQNM*DILQNPLM*IK.I            | 2 | 4.49 | 0.36 | -4.05 |
| IPI00414984 | sarcoglycan, epsilon isoform 1                         | K.ISLVDKTK.Q                        | 1 | 2.27 | 0.16 | -3.22 |
| IPI00414984 | sarcoglycan, epsilon isoform 1                         | K.ISLVDKTK.Q                        | 2 | 2.52 | 0.12 | -3.63 |
| IPI00414984 | sarcoglycan, epsilon isoform 1                         | K.NM*NVEEM*LASEVLGDFLGAVK.N         | 2 | 6.15 | 0.56 | -3.13 |
| IPI00414984 | sarcoglycan, epsilon isoform 1                         | K.NM*NVEEM*LASEVLGDFLGAVK.N         | 3 | 5.67 | 0.40 | -3.85 |
| IPI00414984 | sarcoglycan, epsilon isoform 1                         | K.QVSTYQEVIR.G                      | 2 | 2.69 | 0.21 | -2.15 |
| IPI00414984 | sarcoglycan, epsilon isoform 1                         | K.QVSTYQEVIRGEGILPDGGEYKPPSDS.L     | 3 | 5.41 | 0.34 | -3.14 |
| IPI00414984 | sarcoglycan, epsilon isoform 1                         | R.EVENPQNQLR.C                      | 2 | 2.47 | 0.11 | -3.62 |
| IPI00414984 | sarcoglycan, epsilon isoform 1                         | R.GEGILPDGGEYKPPSDS.L               | 2 | 3.75 | 0.44 | -2.85 |
| IPI00414984 | sarcoglycan, epsilon isoform 1                         | R.GGRVPLPINDLK.E                    | 2 | 2.75 | 0.18 | -2.10 |
| IPI00414984 | sarcoglycan, epsilon isoform 1                         | R.TPYSDGVLYGSPTAENVGKPTIIEITAYNR.R  | 3 | 4.87 | 0.45 | -3.60 |
| IPI00414984 | sarcoglycan, epsilon isoform 1                         | R.TPYSDGVLYGSPTAENVGKPTIIEITAYNRR.T | 3 | 5.27 | 0.60 | -2.93 |
| IPI00414984 | sarcoglycan, epsilon isoform 1                         | R.TPYSDGVLYGSPTAENVGKPTIIEITAYNRR.T | 4 | 5.17 | 0.49 | -3.60 |
| IPI00414984 | sarcoglycan, epsilon isoform 1                         | R.TQFYIDWCK.I                       | 1 | 2.32 | 0.32 | -0.67 |
| IPI00414984 | sarcoglycan, epsilon isoform 1                         | R.TQFYIDWCK.I                       | 2 | 3.22 | 0.36 | -3.07 |
| IPI00414984 | sarcoglycan, epsilon isoform 1                         | R.VPLPINDLK.E                       | 2 | 2.16 | 0.07 | -1.13 |
| IPI00414984 | sarcoglycan, epsilon isoform 1                         | S.DRNVYPSAGVLFVHVLER.E              | 2 | 3.82 | 0.43 | -5.30 |
| IPI00414984 | sarcoglycan, epsilon isoform 1                         | S.DRNVYPSAGVLFVHVLER.E              | 3 | 6.28 | 0.41 | -6.24 |
| IPI00415032 | Isoform 4 of Neuronal cell adhesion molecule precursor | A.LEVPLDLVQPPTITQQSPK.D             | 2 | 5.58 | 0.48 | -4.99 |
| IPI00415032 | Isoform 4 of Neuronal cell adhesion molecule precursor | A.LEVPLDLVQPPTITQQSPK.D             | 3 | 4.38 | 0.25 | -3.82 |
| IPI00415032 | Isoform 4 of Neuronal cell adhesion molecule precursor | A.LEVPLDLVQPPTITQQSPKDYIIDPR.E      | 2 | 3.02 | 0.33 | -3.83 |
| IPI00415032 | Isoform 4 of Neuronal cell adhesion molecule precursor | A.LEVPLDLVQPPTITQQSPKDYIIDPR.E      | 3 | 4.87 | 0.37 | -4.71 |
| IPI00415032 | Isoform 4 of Neuronal cell adhesion molecule precursor | E.PFSHYTLNVR.V                      | 2 | 3.34 | 0.37 | -2.69 |
| IPI00415032 | Isoform 4 of Neuronal cell adhesion molecule precursor | H.HQTEVSGTQTTAQLK.L                 | 2 | 4.78 | 0.55 | -3.18 |
| IPI00415032 | Isoform 4 of Neuronal cell adhesion molecule precursor | K.AAPYWITAPQNLVLSPEGEDGTLICR.A      | 2 | 5.33 | 0.54 | -5.00 |
| IPI00415032 | Isoform 4 of Neuronal cell adhesion molecule precursor | K.AAPYWITAPQNLVLSPEGEDGTLICR.A      | 3 | 6.05 | 0.45 | -4.91 |
| IPI00415032 | Isoform 4 of Neuronal cell adhesion molecule precursor | K.AAPYWITAPQNLVLSPEGEDGTLICR.A      | 4 | 4.08 | 0.32 | -4.52 |
| IPI00415032 | Isoform 4 of Neuronal cell adhesion molecule precursor | K.AETYEGVYQCTAR.N                   | 2 | 4.85 | 0.53 | -3.95 |

|             |                                                        |                                               |   |      |      |       |
|-------------|--------------------------------------------------------|-----------------------------------------------|---|------|------|-------|
| IPI00415032 | Isoform 4 of Neuronal cell adhesion molecule precursor | K.ASEPDKNPTAVEGLGSEPDNLVITWKPLNGFESNGPGLQYK.V | 3 | 6.19 | 0.51 | -1.26 |
| IPI00415032 | Isoform 4 of Neuronal cell adhesion molecule precursor | K.ASEPDKNPTAVEGLGSEPDNLVITWKPLNGFESNGPGLQYK.V | 4 | 5.14 | 0.41 | -3.83 |
| IPI00415032 | Isoform 4 of Neuronal cell adhesion molecule precursor | K.DNRELPSDER.F                                | 2 | 2.26 | 0.08 | -1.16 |
| IPI00415032 | Isoform 4 of Neuronal cell adhesion molecule precursor | K.DSTGTYTCVAR.N                               | 1 | 2.43 | 0.41 | -2.36 |
| IPI00415032 | Isoform 4 of Neuronal cell adhesion molecule precursor | K.DSTGTYTCVAR.N                               | 2 | 4.21 | 0.47 | -4.76 |
| IPI00415032 | Isoform 4 of Neuronal cell adhesion molecule precursor | K.EDGM*LPK.N                                  | 1 | 1.38 | 0.11 | -1.82 |
| IPI00415032 | Isoform 4 of Neuronal cell adhesion molecule precursor | K.EELRGNVLSLECIAEGLPTPIYWAK.E                 | 3 | 4.42 | 0.34 | -5.09 |
| IPI00415032 | Isoform 4 of Neuronal cell adhesion molecule precursor | K.EKLEPITLQSGQSLVLPSCRPPIGLPPPIIFWM*DNSFQR.L  | 3 | 4.40 | 0.55 | -0.96 |
| IPI00415032 | Isoform 4 of Neuronal cell adhesion molecule precursor | K.EKLEPITLQSGQSLVLPSCRPPIGLPPPIIFWM*DNSFQR.L  | 4 | 6.08 | 0.49 | -4.94 |
| IPI00415032 | Isoform 4 of Neuronal cell adhesion molecule precursor | K.EKLEPITLQSGQSLVLPSCRPPIGLPPPIIFWM*DNSFQR.L  | 5 | 3.82 | 0.17 | -0.45 |
| IPI00415032 | Isoform 4 of Neuronal cell adhesion molecule precursor | K.FIIEYEDAM*HKPGLWHHQTEVSGTQTTAQLK.L          | 3 | 6.10 | 0.54 | -5.04 |
| IPI00415032 | Isoform 4 of Neuronal cell adhesion molecule precursor | K.FIIEYEDAM*HKPGLWHHQTEVSGTQTTAQLK.L          | 4 | 5.77 | 0.46 | -4.49 |
| IPI00415032 | Isoform 4 of Neuronal cell adhesion molecule precursor | K.GEGPASPDRVFNTPEGVPSAPSSLK.I                 | 2 | 3.70 | 0.41 | -3.01 |
| IPI00415032 | Isoform 4 of Neuronal cell adhesion molecule precursor | K.GEGPASPDRVFNTPEGVPSAPSSLK.I                 | 3 | 4.79 | 0.43 | -2.81 |
| IPI00415032 | Isoform 4 of Neuronal cell adhesion molecule precursor | K.IDGDTIIFSNVQER.S                            | 2 | 5.23 | 0.46 | -3.56 |
| IPI00415032 | Isoform 4 of Neuronal cell adhesion molecule precursor | K.IDGDTIIFSNVQER.S                            | 3 | 5.17 | 0.30 | -0.47 |
| IPI00415032 | Isoform 4 of Neuronal cell adhesion molecule precursor | K.ILTFQGSK.T                                  | 2 | 2.22 | 0.13 | -2.25 |
| IPI00415032 | Isoform 4 of Neuronal cell adhesion molecule precursor | K.IVNPTLDLSTLEWDPPSHPNGILTEYTLK.Y             | 2 | 4.84 | 0.53 | -3.73 |
| IPI00415032 | Isoform 4 of Neuronal cell adhesion molecule precursor | K.IVNPTLDLSTLEWDPPSHPNGILTEYTLK.Y             | 3 | 5.21 | 0.51 | -4.58 |
| IPI00415032 | Isoform 4 of Neuronal cell adhesion molecule precursor | K.IVNPTLDLSTLEWDPPSHPNGILTEYTLK.Y             | 4 | 4.06 | 0.30 | -3.90 |
| IPI00415032 | Isoform 4 of Neuronal cell adhesion molecule precursor | K.KILTFQGSK.T                                 | 1 | 2.83 | 0.24 | -4.92 |

|             |                                                        |                                          |   |      |      |       |
|-------------|--------------------------------------------------------|------------------------------------------|---|------|------|-------|
| IPI00415032 | Isoform 4 of Neuronal cell adhesion molecule precursor | K.LSPYVNYSTR.V                           | 1 | 2.03 | 0.14 | -2.76 |
| IPI00415032 | Isoform 4 of Neuronal cell adhesion molecule precursor | K.LSPYVNYSTR.V                           | 2 | 3.02 | 0.41 | -3.03 |
| IPI00415032 | Isoform 4 of Neuronal cell adhesion molecule precursor | K.NEVHLEIK.D                             | 1 | 2.25 | 0.16 | -4.23 |
| IPI00415032 | Isoform 4 of Neuronal cell adhesion molecule precursor | K.NEVHLEIK.D                             | 2 | 3.03 | 0.17 | -1.47 |
| IPI00415032 | Isoform 4 of Neuronal cell adhesion molecule precursor | K.NEVHLEIKDPTWIVK.Q                      | 3 | 3.65 | 0.30 | -3.36 |
| IPI00415032 | Isoform 4 of Neuronal cell adhesion molecule precursor | K.NLNFSTR.Y                              | 2 | 2.17 | 0.14 | -2.56 |
| IPI00415032 | Isoform 4 of Neuronal cell adhesion molecule precursor | K.PLNGFESNGPGLQYK.V                      | 3 | 3.53 | 0.23 | -2.06 |
| IPI00415032 | Isoform 4 of Neuronal cell adhesion molecule precursor | K.QPEYAVVQR.G                            | 1 | 2.25 | 0.34 | -3.31 |
| IPI00415032 | Isoform 4 of Neuronal cell adhesion molecule precursor | K.QPEYAVVQR.G                            | 2 | 1.99 | 0.24 | -2.06 |
| IPI00415032 | Isoform 4 of Neuronal cell adhesion molecule precursor | K.SLPSEASEQYLTK.A                        | 1 | 2.36 | 0.33 | -2.91 |
| IPI00415032 | Isoform 4 of Neuronal cell adhesion molecule precursor | K.SLPSEASEQYLTK.A                        | 2 | 4.46 | 0.39 | -6.04 |
| IPI00415032 | Isoform 4 of Neuronal cell adhesion molecule precursor | K.SLPSEASEQYLTK.A                        | 3 | 3.29 | 0.34 | -2.28 |
| IPI00415032 | Isoform 4 of Neuronal cell adhesion molecule precursor | K.SVQLSWTPGDDNNSPITK.F                   | 2 | 5.19 | 0.57 | -4.24 |
| IPI00415032 | Isoform 4 of Neuronal cell adhesion molecule precursor | K.THGM*LPGLEPFSHYTLNVR.V                 | 2 | 4.97 | 0.56 | -5.68 |
| IPI00415032 | Isoform 4 of Neuronal cell adhesion molecule precursor | K.THGM*LPGLEPFSHYTLNVR.V                 | 3 | 4.27 | 0.47 | -3.70 |
| IPI00415032 | Isoform 4 of Neuronal cell adhesion molecule precursor | K.TLQIIHVSEADSGNYQCIK.N                  | 2 | 5.96 | 0.62 | -3.27 |
| IPI00415032 | Isoform 4 of Neuronal cell adhesion molecule precursor | K.TLQIIHVSEADSGNYQCIK.N                  | 3 | 5.97 | 0.45 | -4.53 |
| IPI00415032 | Isoform 4 of Neuronal cell adhesion molecule precursor | K.VQALNDM*GFAPEPAVVM*GHSGEDLPM*VAPGNVR.V | 3 | 5.08 | 0.55 | -4.04 |
| IPI00415032 | Isoform 4 of Neuronal cell adhesion molecule precursor | K.VQALNDM*GFAPEPAVVM*GHSGEDLPM*VAPGNVR.V | 4 | 3.53 | 0.27 | -4.19 |
| IPI00415032 | Isoform 4 of Neuronal cell adhesion molecule precursor | K.YIVSGTPTFPYLIK.V                       | 1 | 3.11 | 0.41 | -1.34 |
| IPI00415032 | Isoform 4 of Neuronal cell adhesion molecule precursor | K.YIVSGTPTFPYLIK.V                       | 2 | 5.14 | 0.51 | -5.26 |

|             |                                                        |                                               |   |      |      |       |
|-------------|--------------------------------------------------------|-----------------------------------------------|---|------|------|-------|
| IPI00415032 | Isoform 4 of Neuronal cell adhesion molecule precursor | K.YIVSGTPTFPYLIK.V                            | 3 | 3.67 | 0.26 | -3.52 |
| IPI00415032 | Isoform 4 of Neuronal cell adhesion molecule precursor | L.PSEASEQYLTK.A                               | 2 | 3.75 | 0.44 | -2.53 |
| IPI00415032 | Isoform 4 of Neuronal cell adhesion molecule precursor | L.TNGVPIEAPDDPSR.K                            | 2 | 4.14 | 0.45 | -4.34 |
| IPI00415032 | Isoform 4 of Neuronal cell adhesion molecule precursor | P.GLEPFSHYTLNVR.V                             | 2 | 3.39 | 0.30 | -2.09 |
| IPI00415032 | Isoform 4 of Neuronal cell adhesion molecule precursor | Q.PPTITQQSPKDYIIDPR.E                         | 2 | 3.53 | 0.47 | -4.33 |
| IPI00415032 | Isoform 4 of Neuronal cell adhesion molecule precursor | R.EDYICYAR.F                                  | 2 | 1.83 | 0.08 | -2.72 |
| IPI00415032 | Isoform 4 of Neuronal cell adhesion molecule precursor | R.ENIVIQCEAK.G                                | 1 | 2.94 | 0.17 | -3.05 |
| IPI00415032 | Isoform 4 of Neuronal cell adhesion molecule precursor | R.ENIVIQCEAK.G                                | 2 | 3.30 | 0.22 | -2.91 |
| IPI00415032 | Isoform 4 of Neuronal cell adhesion molecule precursor | R.ERPPTFLTPEGNASNK.E                          | 2 | 3.21 | 0.21 | -3.57 |
| IPI00415032 | Isoform 4 of Neuronal cell adhesion molecule precursor | R.ERPPTFLTPEGNASNKEELR.G                      | 2 | 4.57 | 0.36 | -5.17 |
| IPI00415032 | Isoform 4 of Neuronal cell adhesion molecule precursor | R.ERPPTFLTPEGNASNKEELR.G                      | 3 | 5.10 | 0.47 | -3.44 |
| IPI00415032 | Isoform 4 of Neuronal cell adhesion molecule precursor | R.ERPPTFLTPEGNASNKEELRGNVLSLECIAEGLPTPIYWAK.E | 4 | 4.38 | 0.32 | -4.01 |
| IPI00415032 | Isoform 4 of Neuronal cell adhesion molecule precursor | R.GAAVSNIVVRPSR.S                             | 2 | 2.63 | 0.14 | -4.64 |
| IPI00415032 | Isoform 4 of Neuronal cell adhesion molecule precursor | R.GAAVSNIVVRPSR.S                             | 3 | 3.00 | 0.35 | -3.92 |
| IPI00415032 | Isoform 4 of Neuronal cell adhesion molecule precursor | R.GHLQGYR.I                                   | 1 | 1.87 | 0.08 | -5.06 |
| IPI00415032 | Isoform 4 of Neuronal cell adhesion molecule precursor | R.GNVLSLECIAEGLPTPIYWAK.E                     | 2 | 5.21 | 0.54 | -5.18 |
| IPI00415032 | Isoform 4 of Neuronal cell adhesion molecule precursor | R.GNVLSLECIAEGLPTPIYWAK.E                     | 3 | 5.02 | 0.39 | -5.31 |
| IPI00415032 | Isoform 4 of Neuronal cell adhesion molecule precursor | R.GNVLSLECIAEGLPTPIYWAKEDGM*LPK.N             | 3 | 3.52 | 0.34 | -4.35 |
| IPI00415032 | Isoform 4 of Neuronal cell adhesion molecule precursor | R.GSM*VSFECK.V                                | 1 | 2.54 | 0.21 | -3.09 |
| IPI00415032 | Isoform 4 of Neuronal cell adhesion molecule precursor | R.GSM*VSFECK.V                                | 2 | 2.97 | 0.26 | -1.60 |
| IPI00415032 | Isoform 4 of Neuronal cell adhesion molecule precursor | R.ILTPANTLYQVIANR.P                           | 2 | 4.08 | 0.48 | -3.49 |

|             |                                                        |                                  |   |      |      |       |
|-------------|--------------------------------------------------------|----------------------------------|---|------|------|-------|
| IPI00415032 | Isoform 4 of Neuronal cell adhesion molecule precursor | R.ISWLTNGVPIEIPDDPSR.K           | 2 | 4.97 | 0.37 | -3.38 |
| IPI00415032 | Isoform 4 of Neuronal cell adhesion molecule precursor | R.ISWLTNGVPIEIPDDPSR.K           | 3 | 3.57 | 0.06 | -3.74 |
| IPI00415032 | Isoform 4 of Neuronal cell adhesion molecule precursor | R.ISWLTNGVPIEIPDDPSRK.I          | 2 | 3.68 | 0.36 | -1.53 |
| IPI00415032 | Isoform 4 of Neuronal cell adhesion molecule precursor | R.ISWLTNGVPIEIPDDPSRK.I          | 3 | 5.40 | 0.40 | -2.54 |
| IPI00415032 | Isoform 4 of Neuronal cell adhesion molecule precursor | R.KIDGDTIIFSNVQER.S              | 2 | 5.34 | 0.51 | -5.43 |
| IPI00415032 | Isoform 4 of Neuronal cell adhesion molecule precursor | R.KIDGDTIIFSNVQER.S              | 3 | 6.06 | 0.36 | -4.35 |
| IPI00415032 | Isoform 4 of Neuronal cell adhesion molecule precursor | R.TVYKNFEK.T                     | 1 | 1.90 | 0.08 | -3.71 |
| IPI00415032 | Isoform 4 of Neuronal cell adhesion molecule precursor | R.TVYKNFEK.T                     | 2 | 2.31 | 0.15 | -1.93 |
| IPI00415032 | Isoform 4 of Neuronal cell adhesion molecule precursor | R.VFNTPEGVPSAPSSLK.I             | 2 | 4.62 | 0.44 | -5.50 |
| IPI00415032 | Isoform 4 of Neuronal cell adhesion molecule precursor | R.VFNTPEGVPSAPSSLK.I             | 3 | 2.99 | 0.11 | -2.34 |
| IPI00415032 | Isoform 4 of Neuronal cell adhesion molecule precursor | R.VKAAPYWITAPQNLVSPGEDGTLICR.A   | 3 | 5.92 | 0.48 | -2.80 |
| IPI00415032 | Isoform 4 of Neuronal cell adhesion molecule precursor | R.VKAAPYWITAPQNLVSPGEDGTLICR.A   | 4 | 2.50 | 0.11 | -3.10 |
| IPI00415032 | Isoform 4 of Neuronal cell adhesion molecule precursor | R.VM*AVNSIGK.S                   | 1 | 2.43 | 0.18 | -3.09 |
| IPI00415032 | Isoform 4 of Neuronal cell adhesion molecule precursor | R.VM*AVNSIGK.S                   | 2 | 2.77 | 0.20 | -2.73 |
| IPI00415032 | Isoform 4 of Neuronal cell adhesion molecule precursor | R.VSQGLNGDLYFSNVLPEPTR.E         | 2 | 5.50 | 0.51 | -3.83 |
| IPI00415032 | Isoform 4 of Neuronal cell adhesion molecule precursor | R.VSQGLNGDLYFSNVLPEPTR.E         | 3 | 4.38 | 0.24 | -2.49 |
| IPI00415032 | Isoform 4 of Neuronal cell adhesion molecule precursor | R.VSQGLNGDLYFSNVLPEDTREDYICYAR.F | 2 | 1.61 | 0.09 | -3.71 |
| IPI00415032 | Isoform 4 of Neuronal cell adhesion molecule precursor | R.VSQGLNGDLYFSNVLPEDTREDYICYAR.F | 3 | 4.89 | 0.46 | -6.46 |
| IPI00415032 | Isoform 4 of Neuronal cell adhesion molecule precursor | R.VSQGLNGDLYFSNVLPEDTREDYICYAR.F | 4 | 3.87 | 0.29 | -5.93 |
| IPI00415032 | Isoform 4 of Neuronal cell adhesion molecule precursor | R.VVNGKGEGPASPDR.V               | 2 | 3.98 | 0.47 | -4.17 |
| IPI00415032 | Isoform 4 of Neuronal cell adhesion molecule precursor | R.VVNGKGEGPASPDR.V               | 3 | 3.11 | 0.41 | -3.22 |

|             |                                                        |                                    |   |      |      |       |
|-------------|--------------------------------------------------------|------------------------------------|---|------|------|-------|
| IPI00415032 | Isoform 4 of Neuronal cell adhesion molecule precursor | R.VVNGKGEGPASPDRVFNTPEGVPSAPSSLK.I | 2 | 3.50 | 0.52 | -3.25 |
| IPI00415032 | Isoform 4 of Neuronal cell adhesion molecule precursor | R.VVNGKGEGPASPDRVFNTPEGVPSAPSSLK.I | 3 | 4.69 | 0.46 | -4.11 |
| IPI00415032 | Isoform 4 of Neuronal cell adhesion molecule precursor | S.PYVNYSTR.V                       | 2 | 3.17 | 0.25 | -2.62 |
| IPI00415032 | Isoform 4 of Neuronal cell adhesion molecule precursor | T.PGDDNNSPITK.F                    | 2 | 3.60 | 0.43 | -2.53 |
| IPI00415032 | Isoform 4 of Neuronal cell adhesion molecule precursor | W.HHQTEVSGTQTTAQLK.L               | 2 | 4.57 | 0.48 | -4.41 |
| IPI00415032 | Isoform 4 of Neuronal cell adhesion molecule precursor | W.HHQTEVSGTQTTAQLK.L               | 3 | 4.01 | 0.31 | -3.60 |
| IPI00415032 | Isoform 4 of Neuronal cell adhesion molecule precursor | W.ITAPQNLVLSPEGEDGTICR.A           | 2 | 4.37 | 0.47 | -5.49 |
| IPI00415032 | Isoform 4 of Neuronal cell adhesion molecule precursor | W.ITAPQNLVLSPEGEDGTICR.A           | 3 | 4.47 | 0.40 | -4.79 |
| IPI00415032 | Isoform 4 of Neuronal cell adhesion molecule precursor | W.LTNGVPIEAPDDPSR.K                | 2 | 4.35 | 0.48 | -3.90 |
| IPI00415032 | Isoform 4 of Neuronal cell adhesion molecule precursor | W.TPGDDNNSPITK.F                   | 2 | 3.21 | 0.43 | -0.47 |
| IPI00418125 | Isoform 1 of Layilin precursor                         | K.FIENLLPSDGFDFWIGLR.R             | 2 | 4.48 | 0.42 | -5.40 |
| IPI00418163 | C4B1                                                   | A.PFLQLALVR.E                      | 2 | 3.53 | 0.25 | -4.36 |
| IPI00418163 | C4B1                                                   | A.PKVVEEQESR.V                     | 2 | 3.04 | 0.29 | -1.03 |
| IPI00418163 | C4B1                                                   | D.DPDAPLQPVTPLQLFEGR.R             | 2 | 3.34 | 0.40 | -3.65 |
| IPI00418163 | C4B1                                                   | D.DPDAPLQPVTPLQLFEGR.R             | 3 | 4.88 | 0.46 | -2.11 |
| IPI00418163 | C4B1                                                   | D.HAVDLIQK.G                       | 2 | 2.94 | 0.27 | -0.14 |
| IPI00418163 | C4B1                                                   | D.PLDTLGSEGALSPGGVASLLR.L          | 2 | 5.16 | 0.52 | -3.43 |
| IPI00418163 | C4B1                                                   | D.PLDTLGSEGALSPGGVASLLR.L          | 3 | 5.06 | 0.42 | -2.98 |
| IPI00418163 | C4B1                                                   | E.APKVVEEQESR.V                    | 2 | 3.24 | 0.37 | -3.22 |
| IPI00418163 | C4B1                                                   | E.APKVVEEQESR.V                    | 3 | 3.64 | 0.30 | -2.42 |
| IPI00418163 | C4B1                                                   | F.LSCCQFAESLR.K                    | 2 | 3.54 | 0.35 | -2.59 |
| IPI00418163 | C4B1                                                   | K.ADGSYAAWLSR.D                    | 2 | 3.01 | 0.24 |       |
| IPI00418163 | C4B1                                                   | K.AEFQDALEK.L                      | 1 | 2.52 | 0.13 | -4.21 |
| IPI00418163 | C4B1                                                   | K.AEFQDALEK.L                      | 2 | 3.23 | 0.16 | -3.14 |
| IPI00418163 | C4B1                                                   | K.AEFQDALEKLNLM*GITDLQGLR.L        | 2 | 4.80 | 0.57 | -3.22 |
| IPI00418163 | C4B1                                                   | K.AEFQDALEKLNLM*GITDLQGLR.L        | 3 | 6.42 | 0.49 | -5.12 |
| IPI00418163 | C4B1                                                   | K.AEFQDALEKLNLM*GITDLQGLR.L        | 4 | 4.59 | 0.32 | -2.23 |
| IPI00418163 | C4B1                                                   | K.AEFQDALEKLNMGITDLQGLR.L          | 2 | 3.83 | 0.32 |       |
| IPI00418163 | C4B1                                                   | K.AEFQDALEKLNMGITDLQGLR.L          | 3 | 5.14 | 0.35 | -4.61 |
| IPI00418163 | C4B1                                                   | K.AEM*ADQAAAWLTR.Q                 | 2 | 4.00 | 0.29 | -3.79 |
| IPI00418163 | C4B1                                                   | K.AEMADQAAAWLTR.Q                  | 2 | 3.56 | 0.19 |       |
| IPI00418163 | C4B1                                                   | K.ASAGLLGAHAAAITAYALTLTK.A         | 2 | 6.12 | 0.64 | -3.89 |



|             |      |                                  |   |      |      |       |
|-------------|------|----------------------------------|---|------|------|-------|
| IPI00418163 | C4B1 | K.ASAGLLGAHAAAITAYALTLTK.A       | 3 | 4.59 | 0.52 | -5.32 |
| IPI00418163 | C4B1 | K.ASAGLLGAHAAAITAYALTLTK.A       | 4 | 3.88 | 0.45 | -0.90 |
| IPI00418163 | C4B1 | K.ASAGLLGAHAAAITAYALTLTKAPADLR.G | 3 | 5.69 | 0.56 | -5.20 |
| IPI00418163 | C4B1 | K.ASAGLLGAHAAAITAYALTLTKAPADLR.G | 4 | 4.41 | 0.46 | -4.73 |
| IPI00418163 | C4B1 | K.ASSFLGEK.A                     | 1 | 1.79 | 0.13 | -4.90 |
| IPI00418163 | C4B1 | K.ASSFLGEK.A                     | 2 | 2.73 | 0.16 | -3.37 |
| IPI00418163 | C4B1 | K.DDPDAPLQPVTPLQLFEGR.R          | 2 | 4.90 | 0.57 | -4.98 |
| IPI00418163 | C4B1 | K.DDPDAPLQPVTPLQLFEGR.R          | 3 | 3.93 | 0.32 | -3.18 |
| IPI00418163 | C4B1 | K.DDPDAPLQPVTPLQLFEGRR.N         | 3 | 2.03 | 0.14 | -4.63 |
| IPI00418163 | C4B1 | K.DHAVDLIQK.G                    | 1 | 3.03 | 0.30 | -2.14 |
| IPI00418163 | C4B1 | K.DHAVDLIQK.G                    | 2 | 2.76 | 0.32 | -2.89 |
| IPI00418163 | C4B1 | K.DVKAANQM*R.N                   | 2 | 2.64 | 0.13 | -1.54 |
| IPI00418163 | C4B1 | K.EGAIHREELVYELNPLDHR.G          | 2 | 4.35 | 0.44 | -4.58 |
| IPI00418163 | C4B1 | K.EGAIHREELVYELNPLDHR.G          | 3 | 5.45 | 0.39 | -4.68 |
| IPI00418163 | C4B1 | K.EGAIHREELVYELNPLDHR.G          | 4 | 2.47 | 0.18 | -2.23 |
| IPI00418163 | C4B1 | K.EGAIHREELVYELNPLDHR.G          | 5 | 2.71 | 0.21 | -3.27 |
| IPI00418163 | C4B1 | K.EGAIHREELVYELNPLDHRG.R         | 3 | 4.71 | 0.30 | -2.28 |
| IPI00418163 | C4B1 | K.EVYM*PSSIFQDDFVIPDISEPGTWK.I   | 2 | 4.19 | 0.53 | -3.32 |
| IPI00418163 | C4B1 | K.EVYM*PSSIFQDDFVIPDISEPGTWK.I   | 3 | 2.90 | 0.17 | -4.23 |
| IPI00418163 | C4B1 | K.FACYYP.V                       | 1 | 1.88 | 0.26 | -1.69 |
| IPI00418163 | C4B1 | K.FACYYP.V                       | 2 | 2.69 | 0.29 | -1.19 |
| IPI00418163 | C4B1 | K.GLCVATPVQLR.V                  | 1 | 2.09 | 0.28 | -4.05 |
| IPI00418163 | C4B1 | K.GLCVATPVQLR.V                  | 2 | 3.26 | 0.21 | -2.73 |
| IPI00418163 | C4B1 | K.GSVFLRNPSR.N                   | 2 | 2.67 | 0.15 | -3.14 |
| IPI00418163 | C4B1 | K.INVKVGGNSK.G                   | 2 | 2.52 | 0.17 | -2.51 |
| IPI00418163 | C4B1 | K.ITPGKPYILTVPGHLDDEM*QLDIQAR.Y  | 2 | 3.47 | 0.45 | -1.39 |
| IPI00418163 | C4B1 | K.ITPGKPYILTVPGHLDDEM*QLDIQAR.Y  | 3 | 4.87 | 0.51 | -4.46 |
| IPI00418163 | C4B1 | K.ITPGKPYILTVPGHLDDEM*QLDIQAR.Y  | 4 | 3.95 | 0.28 | -4.16 |
| IPI00418163 | C4B1 | K.ITPGKPYILTVPGHLDDEMQLDIQAR.Y   | 3 | 4.61 | 0.41 |       |
| IPI00418163 | C4B1 | K.ITQVLHFTK.D                    | 1 | 2.24 | 0.30 | -4.38 |
| IPI00418163 | C4B1 | K.ITQVLHFTK.D                    | 2 | 3.30 | 0.38 | -3.07 |
| IPI00418163 | C4B1 | K.ITQVLHFTKDVK.A                 | 2 | 4.04 | 0.36 | -4.01 |
| IPI00418163 | C4B1 | K.KEVYM*PSSIFQDDFVIPDISEPGTWK.I  | 3 | 4.00 | 0.29 | -1.31 |
| IPI00418163 | C4B1 | K.KYVLPNFEVK.I                   | 1 | 3.22 | 0.21 | -1.97 |
| IPI00418163 | C4B1 | K.KYVLPNFEVK.I                   | 2 | 3.37 | 0.31 | -2.23 |
| IPI00418163 | C4B1 | K.KYVLPNFEVK.I                   | 3 | 3.87 | 0.27 | -2.87 |
| IPI00418163 | C4B1 | K.LELSVDGAK.Q                    | 1 | 2.07 | 0.11 | -3.30 |
| IPI00418163 | C4B1 | K.LELSVDGAK.Q                    | 2 | 2.62 | 0.05 | -1.34 |
| IPI00418163 | C4B1 | K.LGQYASPTAK.R                   | 1 | 2.38 | 0.30 | -3.94 |
| IPI00418163 | C4B1 | K.LGQYASPTAK.R                   | 2 | 3.64 | 0.30 | -2.10 |
| IPI00418163 | C4B1 | K.LGQYASPTAKR.C                  | 2 | 3.20 | 0.31 | -1.92 |
| IPI00418163 | C4B1 | K.LHLETDSLALVALGALDTALYAAGSK.S   | 2 | 7.37 | 0.59 | -4.74 |

|             |      |                                               |   |      |      |       |
|-------------|------|-----------------------------------------------|---|------|------|-------|
| IPI00418163 | C4B1 | K.LHLETDSLALVALGALDTALYAAGSK.S                | 3 | 5.93 | 0.57 | -5.66 |
| IPI00418163 | C4B1 | K.LHLETDSLALVALGALDTALYAAGSK.S                | 4 | 5.53 | 0.57 | -3.35 |
| IPI00418163 | C4B1 | K.LNM*GITDLQGLR.L                             | 2 | 3.92 | 0.39 | -2.16 |
| IPI00418163 | C4B1 | K.LQETSNWLLSQQQADGSFQDLSPIVHR.S               | 2 | 4.01 | 0.53 | -3.45 |
| IPI00418163 | C4B1 | K.LQETSNWLLSQQQADGSFQDLSPIVHR.S               | 3 | 7.37 | 0.57 | -3.70 |
| IPI00418163 | C4B1 | K.LQETSNWLLSQQQADGSFQDLSPIVHR.S               | 4 | 6.18 | 0.43 | -5.00 |
| IPI00418163 | C4B1 | K.LTSLSDRYVSHFETEGPHVLLYFDSVPTSR.E            | 3 | 7.13 | 0.54 | -4.58 |
| IPI00418163 | C4B1 | K.LTSLSDRYVSHFETEGPHVLLYFDSVPTSR.E            | 4 | 4.45 | 0.37 | -4.48 |
| IPI00418163 | C4B1 | K.LVNGQSHISLSK.A                              | 1 | 2.64 | 0.24 | -2.75 |
| IPI00418163 | C4B1 | K.LVNGQSHISLSK.A                              | 2 | 3.80 | 0.42 | -2.64 |
| IPI00418163 | C4B1 | K.LVNGQSHISLSKAEFQDALEK.L                     | 3 | 3.24 | 0.40 | -3.17 |
| IPI00418163 | C4B1 | K.M*RPSTDTITVM*VENSHGLR.V                     | 2 | 1.97 | 0.31 | -5.48 |
| IPI00418163 | C4B1 | K.M*RPSTDTITVM*VENSHGLR.V                     | 3 | 5.50 | 0.52 | -3.54 |
| IPI00418163 | C4B1 | K.M*RPSTDTITVM*VENSHGLR.V                     | 4 | 4.69 | 0.46 | -3.02 |
| IPI00418163 | C4B1 | K.PVQGVAYVR.F                                 | 1 | 2.57 | 0.14 | -3.21 |
| IPI00418163 | C4B1 | K.QRVEASISK.A                                 | 2 | 2.72 | 0.08 | -2.72 |
| IPI00418163 | C4B1 | K.RCCQDGVTR.L                                 | 2 | 2.98 | 0.12 |       |
| IPI00418163 | C4B1 | K.RHLVPGAPFLLQALVR.E                          | 3 | 3.46 | 0.30 | -4.10 |
| IPI00418163 | C4B1 | K.SCGLHQLLR.G                                 | 1 | 2.27 | 0.15 |       |
| IPI00418163 | C4B1 | K.SCGLHQLLR.G                                 | 2 | 2.91 | 0.22 |       |
| IPI00418163 | C4B1 | K.SHALQLNNR.Q                                 | 1 | 2.62 | 0.26 | -4.91 |
| IPI00418163 | C4B1 | K.SHALQLNNR.Q                                 | 2 | 2.98 | 0.28 | -1.91 |
| IPI00418163 | C4B1 | K.VDFTLSSER.D                                 | 1 | 2.05 | 0.17 | -3.10 |
| IPI00418163 | C4B1 | K.VDFTLSSER.D                                 | 2 | 3.34 | 0.38 | -4.33 |
| IPI00418163 | C4B1 | K.VDFTLSSERDFALLSLQVPLK.D                     | 3 | 3.10 | 0.18 | -3.13 |
| IPI00418163 | C4B1 | K.VDFTLSSERDFALLSLQVPLKDAK.S                  | 2 | 3.81 | 0.45 | -2.80 |
| IPI00418163 | C4B1 | K.VDFTLSSERDFALLSLQVPLKDAK.S                  | 3 | 5.14 | 0.47 | -7.67 |
| IPI00418163 | C4B1 | K.VDFTLSSERDFALLSLQVPLKDAK.S                  | 4 | 3.73 | 0.47 | -4.64 |
| IPI00418163 | C4B1 | K.VFEAM*NSYDLGCGPGGGDSALQVFQAAGLAFSDGDQWTLR.K | 3 | 6.49 | 0.53 |       |
| IPI00418163 | C4B1 | K.VFEAMNSYDLGCGPGGGDSALQVFQAAGLAFSDGDQWTLR.K  | 3 | 5.40 | 0.36 |       |
| IPI00418163 | C4B1 | K.VGLSGM*AIADVTLISGFHALR.A                    | 2 | 3.01 | 0.31 | 0.29  |
| IPI00418163 | C4B1 | K.VGLSGM*AIADVTLISGFHALR.A                    | 3 | 6.65 | 0.56 | -4.52 |
| IPI00418163 | C4B1 | K.VGLSGM*AIADVTLISGFHALRADLEK.L               | 4 | 4.38 | 0.43 | -2.71 |
| IPI00418163 | C4B1 | K.VGLSGMAIADVTLISGFHALR.A                     | 3 | 4.19 | 0.36 |       |
| IPI00418163 | C4B1 | K.VLQIEKEGAIHR.E                              | 2 | 4.22 | 0.27 | -4.02 |
| IPI00418163 | C4B1 | K.VLQIEKEGAIHR.E                              | 3 | 3.75 | 0.31 | -3.15 |
| IPI00418163 | C4B1 | K.VLQIEKEGAIHREELVYELNPLDHR.G                 | 3 | 6.23 | 0.59 | -4.44 |
| IPI00418163 | C4B1 | K.VLQIEKEGAIHREELVYELNPLDHR.G                 | 4 | 4.48 | 0.36 | -4.52 |
| IPI00418163 | C4B1 | K.VLQIEKEGAIHREELVYELNPLDHR.G                 | 5 | 4.06 | 0.36 | -4.16 |
| IPI00418163 | C4B1 | K.VLQIEKEGAIHREELVYELNPLDHR.G                 | 6 | 3.33 | 0.27 | -2.77 |
| IPI00418163 | C4B1 | K.VLSLAQEQVGGGSPEK.L                          | 1 | 3.34 | 0.49 | -1.95 |
| IPI00418163 | C4B1 | K.VLSLAQEQVGGGSPEK.L                          | 2 | 5.17 | 0.51 | -4.87 |

|             |      |                                                 |   |      |      |       |
|-------------|------|-------------------------------------------------|---|------|------|-------|
| IPI00418163 | C4B1 | K.VLSLAQEQVGG SPEK.L                            | 3 | 3.53 | 0.32 | -1.80 |
| IPI00418163 | C4B1 | K.VLSLAQEQVGG SPEKLQETSNWLLSQQQADGSFQDLSPVIHR.S | 3 | 5.01 | 0.45 | -2.36 |
| IPI00418163 | C4B1 | K.VLSLAQEQVGG SPEKLQETSNWLLSQQQADGSFQDLSPVIHR.S | 4 | 8.21 | 0.56 | -3.39 |
| IPI00418163 | C4B1 | K.VLSLAQEQVGG SPEKLQETSNWLLSQQQADGSFQDLSPVIHR.S | 5 | 6.05 | 0.37 | -2.06 |
| IPI00418163 | C4B1 | K.YVLPNFEVK.I                                   | 1 | 2.71 | 0.17 | -3.38 |
| IPI00418163 | C4B1 | K.YVLPNFEVK.I                                   | 2 | 2.55 | 0.19 | -1.83 |
| IPI00418163 | C4B1 | L.GQYASPTAK.R                                   | 1 | 1.90 | 0.19 | -2.03 |
| IPI00418163 | C4B1 | L.SPGGVASLLR.L                                  | 2 | 4.09 | 0.30 | -2.65 |
| IPI00418163 | C4B1 | L.VNGQSHISLSK.A                                 | 2 | 3.56 | 0.35 | -0.30 |
| IPI00418163 | C4B1 | R.AACAQLNDFLQEYGTQGCQV.-                        | 2 | 3.35 | 0.53 | -2.34 |
| IPI00418163 | C4B1 | R.ADLEKLTSLSDR.Y                                | 2 | 3.07 | 0.34 | -2.75 |
| IPI00418163 | C4B1 | R.ADLEKLTSLSDR.Y                                | 3 | 2.72 | 0.32 | -0.64 |
| IPI00418163 | C4B1 | R.ADLEKLTSLSDRYVSHFETEGPHVLLYFDSVPTSR.E         | 4 | 2.84 | 0.13 | -3.78 |
| IPI00418163 | C4B1 | R.ALEILQEEDLIDEDDIPVR.S                         | 2 | 5.55 | 0.43 | -5.78 |
| IPI00418163 | C4B1 | R.ALEILQEEDLIDEDDIPVR.S                         | 3 | 4.88 | 0.38 | -5.46 |
| IPI00418163 | C4B1 | R.ALEILQEEDLIDEDDIPVRSFFPENWLWR.V               | 3 | 4.69 | 0.52 | -3.20 |
| IPI00418163 | C4B1 | R.AVGSGATFSHYYYM*ILSR.G                         | 2 | 4.81 | 0.53 | -5.30 |
| IPI00418163 | C4B1 | R.AVGSGATFSHYYYM*ILSR.G                         | 3 | 4.04 | 0.48 | -4.94 |
| IPI00418163 | C4B1 | R.AVGSGATFSHYYYMILSR.G                          | 3 | 3.29 | 0.25 |       |
| IPI00418163 | C4B1 | R.CSVFYGAPSK.S                                  | 1 | 2.55 | 0.31 | -3.16 |
| IPI00418163 | C4B1 | R.CSVFYGAPSK.S                                  | 2 | 3.72 | 0.39 | -2.36 |
| IPI00418163 | C4B1 | R.DFALLSLQVPLK.D                                | 2 | 4.18 | 0.45 | -4.86 |
| IPI00418163 | C4B1 | R.DFALLSLQVPLKDAK.S                             | 2 | 4.57 | 0.46 | -4.35 |
| IPI00418163 | C4B1 | R.DFALLSLQVPLKDAK.S                             | 3 | 3.48 | 0.43 | -3.14 |
| IPI00418163 | C4B1 | R.DKGQAGLQR.A                                   | 2 | 2.59 | 0.10 | -2.19 |
| IPI00418163 | C4B1 | R.EAPKVVEEQESR.V                                | 1 | 2.24 | 0.07 |       |
| IPI00418163 | C4B1 | R.EAPKVVEEQESR.V                                | 2 | 2.88 | 0.34 | -3.16 |
| IPI00418163 | C4B1 | R.EAPKVVEEQESR.V                                | 3 | 2.63 | 0.22 | -2.45 |
| IPI00418163 | C4B1 | R.ECVGFEAVQEVVGLVQPASATLYDYNNPER.R              | 2 | 4.27 | 0.49 |       |
| IPI00418163 | C4B1 | R.ECVGFEAVQEVVGLVQPASATLYDYNNPER.R              | 3 | 4.22 | 0.31 | -3.37 |
| IPI00418163 | C4B1 | R.ECVGFEAVQEVVGLVQPASATLYDYNNPERR.C             | 3 | 6.63 | 0.58 | -5.53 |
| IPI00418163 | C4B1 | R.ECVGFEAVQEVVGLVQPASATLYDYNNPERR.C             | 4 | 4.03 | 0.46 | -3.98 |
| IPI00418163 | C4B1 | R.ECVGFEAVQEVVGLVQPASATLYDYNNPERR.C             | 5 | 2.74 | 0.24 | -2.59 |
| IPI00418163 | C4B1 | R.EELVYELNPLDHR.G                               | 2 | 3.88 | 0.48 | -2.39 |
| IPI00418163 | C4B1 | R.EFHLHLR.L                                     | 1 | 2.09 | 0.11 | -4.66 |
| IPI00418163 | C4B1 | R.EM*SGSPASGIPVK.V                              | 1 | 1.99 | 0.24 | -3.90 |
| IPI00418163 | C4B1 | R.EM*SGSPASGIPVK.V                              | 2 | 2.30 | 0.12 | -3.94 |
| IPI00418163 | C4B1 | R.EPFLSCCQFAESLR.K                              | 2 | 4.10 | 0.31 | -5.14 |
| IPI00418163 | C4B1 | R.EPFLSCCQFAESLR.K                              | 3 | 4.17 | 0.26 |       |
| IPI00418163 | C4B1 | R.EPFLSCCQFAESLRK.K                             | 2 | 2.78 | 0.21 | -2.63 |
| IPI00418163 | C4B1 | R.FGLLDEDGK.K                                   | 2 | 3.33 | 0.14 | -3.04 |
| IPI00418163 | C4B1 | R.FGLLDEDGK.T                                   | 1 | 3.16 | 0.22 | -2.26 |

|             |      |                                  |   |      |      |       |
|-------------|------|----------------------------------|---|------|------|-------|
| IPI00418163 | C4B1 | R.FGLLEDGKK.T                    | 2 | 3.16 | 0.21 | -1.47 |
| IPI00418163 | C4B1 | R.FGLLEDGKKTFFR.G                | 2 | 4.33 | 0.50 | -4.76 |
| IPI00418163 | C4B1 | R.FGLLEDGKKTFFR.G                | 3 | 4.11 | 0.31 | -4.83 |
| IPI00418163 | C4B1 | R.FGLLEDGKKTFFR.G                | 4 | 3.11 | 0.18 | -4.04 |
| IPI00418163 | C4B1 | R.FGLLEDGKKTFFRGLSQTK.L          | 3 | 2.75 | 0.25 | -0.71 |
| IPI00418163 | C4B1 | R.GCGEQTM*IYLAPTLAASR.Y          | 2 | 5.38 | 0.50 | -3.89 |
| IPI00418163 | C4B1 | R.GCGEQTM*IYLAPTLAASR.Y          | 3 | 3.62 | 0.34 | -3.87 |
| IPI00418163 | C4B1 | R.GCGEQTM*IYLAPTLAASR.Y          | 2 | 4.91 | 0.39 |       |
| IPI00418163 | C4B1 | R.GHLFLQTDQPIYNPGQR.V            | 2 | 6.47 | 0.60 | -4.40 |
| IPI00418163 | C4B1 | R.GHLFLQTDQPIYNPGQR.V            | 3 | 5.34 | 0.44 | -3.84 |
| IPI00418163 | C4B1 | R.GLEELQFSLGSK.I                 | 1 | 3.08 | 0.37 | -4.48 |
| IPI00418163 | C4B1 | R.GLEELQFSLGSK.I                 | 2 | 4.92 | 0.52 | -7.24 |
| IPI00418163 | C4B1 | R.GLQDEGYR.M                     | 1 | 1.85 | 0.22 | -4.44 |
| IPI00418163 | C4B1 | R.GLQDEGYR.M                     | 2 | 3.43 | 0.37 | -2.87 |
| IPI00418163 | C4B1 | R.GLQDEGYRM*K.F                  | 2 | 2.40 | 0.12 | -4.36 |
| IPI00418163 | C4B1 | R.GPEVQLVAHSPWLK.D               | 1 | 2.62 | 0.14 |       |
| IPI00418163 | C4B1 | R.GPEVQLVAHSPWLK.D               | 2 | 4.57 | 0.50 | -3.48 |
| IPI00418163 | C4B1 | R.GPEVQLVAHSPWLK.D               | 3 | 3.80 | 0.40 | -2.36 |
| IPI00418163 | C4B1 | R.GPEVQLVAHSPWLKDSLRS.T          | 3 | 3.77 | 0.33 |       |
| IPI00418163 | C4B1 | R.GPEVQLVAHSPWLKDSLRS.T          | 4 | 2.32 | 0.16 | -4.40 |
| IPI00418163 | C4B1 | R.GQIVFM*NR.E                    | 2 | 2.63 | 0.24 | -1.45 |
| IPI00418163 | C4B1 | R.GQIVFM*NREPK.R                 | 2 | 2.49 | 0.21 |       |
| IPI00418163 | C4B1 | R.GRTLEIPGNSDPNM*IPDGFNSYVR.V    | 2 | 2.68 | 0.41 | -2.81 |
| IPI00418163 | C4B1 | R.GRTLEIPGNSDPNM*IPDGFNSYVR.V    | 3 | 5.17 | 0.43 | -2.92 |
| IPI00418163 | C4B1 | R.GSFEPVGDVAVSK.V                | 1 | 2.92 | 0.49 | -2.86 |
| IPI00418163 | C4B1 | R.GSFEPVGDVAVSK.V                | 2 | 3.74 | 0.39 | -2.64 |
| IPI00418163 | C4B1 | R.GSFEPVGDVAVSKVLQIEK.E          | 2 | 4.00 | 0.42 | -3.93 |
| IPI00418163 | C4B1 | R.GSFEPVGDVAVSKVLQIEK.E          | 3 | 2.60 | 0.31 | -3.56 |
| IPI00418163 | C4B1 | R.GSFEPVGDVAVSKVLQIEKEGAIHR.E    | 3 | 3.97 | 0.34 | -4.01 |
| IPI00418163 | C4B1 | R.GSFEPVGDVAVSKVLQIEKEGAIHR.E    | 4 | 2.91 | 0.22 | -5.74 |
| IPI00418163 | C4B1 | R.GSFEPVGDVAVSKVLQIEKEGAIHR.E    | 5 | 2.91 | 0.26 | -3.00 |
| IPI00418163 | C4B1 | R.GSSTWLTAFVLK.V                 | 1 | 2.06 | 0.17 | -3.21 |
| IPI00418163 | C4B1 | R.GSSTWLTAFVLK.V                 | 2 | 4.39 | 0.40 | -3.41 |
| IPI00418163 | C4B1 | R.HLVPGAPFLLQALVR.E              | 2 | 3.09 | 0.39 | -5.37 |
| IPI00418163 | C4B1 | R.HLVPGAPFLLQALVR.E              | 3 | 4.01 | 0.30 | -4.25 |
| IPI00418163 | C4B1 | R.KADGSYAAWLSR.D                 | 2 | 3.86 | 0.37 | -4.03 |
| IPI00418163 | C4B1 | R.KADGSYAAWLSR.D                 | 3 | 3.49 | 0.11 | -3.51 |
| IPI00418163 | C4B1 | R.KKEVYM*PSSIFQDDFVIPDISEPGTWK.I | 3 | 4.52 | 0.39 | -5.33 |
| IPI00418163 | C4B1 | R.LLATLCSAEVCQCAEGK.C            | 2 | 5.88 | 0.56 | -6.70 |
| IPI00418163 | C4B1 | R.LLATLCSAEVCQCAEGK.C            | 3 | 6.16 | 0.43 | -6.82 |
| IPI00418163 | C4B1 | R.LLATLCSAEVCQCAEGKCPR.Q         | 3 | 2.96 | 0.16 |       |
| IPI00418163 | C4B1 | R.LLLFSPSVVHLGVPL.S              | 2 | 2.99 | 0.29 | -3.96 |

|             |      |                                                  |   |      |      |       |
|-------------|------|--------------------------------------------------|---|------|------|-------|
| IPI00418163 | C4B1 | R.LLLFSPSVVHLGVPLSVGVQLQDVPR.G                   | 2 | 4.47 | 0.64 | -1.36 |
| IPI00418163 | C4B1 | R.LLLFSPSVVHLGVPLSVGVQLQDVPR.G                   | 3 | 6.08 | 0.58 | -4.45 |
| IPI00418163 | C4B1 | R.LLLFSPSVVHLGVPLSVGVQLQDVPR.G                   | 4 | 3.95 | 0.40 | -2.47 |
| IPI00418163 | C4B1 | R.LLLFSPSVVHLGVPLSVGVQLQDVPRGQVVK.G              | 3 | 3.59 | 0.27 |       |
| IPI00418163 | C4B1 | R.LRLEPGKEYLIM*GLDGATYDLEGHPQYLLDSNSWIEEM*PSER.L | 4 | 4.21 | 0.35 | -3.19 |
| IPI00418163 | C4B1 | R.LTVAAPPSGGPGFLSIER.P                           | 2 | 4.29 | 0.44 | -4.43 |
| IPI00418163 | C4B1 | R.LTVAAPPSGGPGFLSIERPDSRPPR.V                    | 2 | 2.42 | 0.25 | -3.99 |
| IPI00418163 | C4B1 | R.LTVAAPPSGGPGFLSIERPDSRPPR.V                    | 3 | 2.34 | 0.17 | -2.13 |
| IPI00418163 | C4B1 | R.LTVAAPPSGGPGFLSIERPDSRPPR.V                    | 4 | 2.19 | 0.18 | -3.67 |
| IPI00418163 | C4B1 | R.M*KFACYPR.V                                    | 2 | 2.54 | 0.10 |       |
| IPI00418163 | C4B1 | R.NGESVKLHLETDSLALVALGALDTALYAAGSK.S             | 3 | 3.44 | 0.36 | -6.33 |
| IPI00418163 | C4B1 | R.NGESVKLHLETDSLALVALGALDTALYAAGSK.S             | 4 | 4.01 | 0.25 | -3.24 |
| IPI00418163 | C4B1 | R.NGFKSHALQLNNR.Q                                | 3 | 3.18 | 0.31 | -2.45 |
| IPI00418163 | C4B1 | R.QGSFQGGFR.S                                    | 1 | 1.45 | 0.05 | -3.46 |
| IPI00418163 | C4B1 | R.QGSFQGGFR.S                                    | 2 | 2.28 | 0.34 | -2.13 |
| IPI00418163 | C4B1 | R.RCSVFGAPSK.S                                   | 2 | 3.45 | 0.20 |       |
| IPI00418163 | C4B1 | R.RGHLFLQTDQPIYNGQR.V                            | 2 | 4.58 | 0.46 | -4.28 |
| IPI00418163 | C4B1 | R.RGHLFLQTDQPIYNGQR.V                            | 3 | 4.79 | 0.33 | -4.04 |
| IPI00418163 | C4B1 | R.RGHLFLQTDQPIYNGQR.V                            | 4 | 2.32 | 0.16 | -3.53 |
| IPI00418163 | C4B1 | R.SFFPENWLWR.V                                   | 1 | 2.05 | 0.24 | -2.53 |
| IPI00418163 | C4B1 | R.SFFPENWLWR.V                                   | 2 | 3.48 | 0.34 | -4.33 |
| IPI00418163 | C4B1 | R.SM*QGGLVGNDETVALTAFVTIALHHGLAVFQDEGAEPLK.Q     | 3 | 6.29 | 0.60 | -2.32 |
| IPI00418163 | C4B1 | R.SM*QGGLVGNDETVALTAFVTIALHHGLAVFQDEGAEPLK.Q     | 4 | 6.42 | 0.50 | -8.14 |
| IPI00418163 | C4B1 | R.SM*QGGLVGNDETVALTAFVTIALHHGLAVFQDEGAEPLKQR.V   | 3 | 4.14 | 0.45 | -5.18 |
| IPI00418163 | C4B1 | R.SM*QGGLVGNDETVALTAFVTIALHHGLAVFQDEGAEPLKQR.V   | 4 | 5.33 | 0.48 | -4.07 |
| IPI00418163 | C4B1 | R.SM*QGGLVGNDETVALTAFVTIALHHGLAVFQDEGAEPLKQR.V   | 5 | 4.32 | 0.39 | -3.55 |
| IPI00418163 | C4B1 | R.STQDTVIALDALSAYWIASHTTEER.G                    | 2 | 5.04 | 0.55 | -3.85 |
| IPI00418163 | C4B1 | R.STQDTVIALDALSAYWIASHTTEER.G                    | 3 | 5.04 | 0.49 | -4.72 |
| IPI00418163 | C4B1 | R.STQDTVIALDALSAYWIASHTTEERG.L                   | 3 | 3.66 | 0.35 | -3.92 |
| IPI00418163 | C4B1 | R.TLEIPGNSDPNM*IPDGFNSYVR.V                      | 2 | 4.01 | 0.46 | -5.73 |
| IPI00418163 | C4B1 | R.TLEIPGNSDPNM*IPDGFNSYVR.V                      | 3 | 3.90 | 0.23 | -6.50 |
| IPI00418163 | C4B1 | R.TTNIQGINLLFSSR.R                               | 1 | 2.76 | 0.37 | -2.92 |
| IPI00418163 | C4B1 | R.TTNIQGINLLFSSR.R                               | 2 | 4.92 | 0.49 | -5.94 |
| IPI00418163 | C4B1 | R.TTNIQGINLLFSSR.R                               | 3 | 3.10 | 0.21 | -1.09 |
| IPI00418163 | C4B1 | R.TTNIQGINLLFSSRR.G                              | 3 | 1.87 | 0.16 | -3.72 |
| IPI00418163 | C4B1 | R.TYNVLDM*K.N                                    | 1 | 2.12 | 0.06 | -3.59 |
| IPI00418163 | C4B1 | R.TYNVLDM*K.N                                    | 2 | 3.22 | 0.28 | -0.99 |
| IPI00418163 | C4B1 | R.VDVQAGACEGK.L                                  | 2 | 3.75 | 0.38 | -3.30 |
| IPI00418163 | C4B1 | R.VDVQAGACEGKLELSVDGAK.Q                         | 2 | 5.46 | 0.53 | -5.36 |
| IPI00418163 | C4B1 | R.VDVQAGACEGKLELSVDGAK.Q                         | 3 | 4.72 | 0.49 | -4.50 |
| IPI00418163 | C4B1 | R.VEASISK.A                                      | 1 | 2.35 | 0.16 | -2.43 |
| IPI00418163 | C4B1 | R.VEYGFQVK.V                                     | 1 | 2.17 | 0.15 | -3.54 |

|             |                                  |                                   |   |      |      |       |
|-------------|----------------------------------|-----------------------------------|---|------|------|-------|
| IPI00418163 | C4B1                             | R.VEYGFQVK.V                      | 2 | 2.70 | 0.29 | -2.50 |
| IPI00418163 | C4B1                             | R.VFALDQK.M                       | 1 | 2.15 | 0.11 | -3.54 |
| IPI00418163 | C4B1                             | R.VFALDQK.M                       | 2 | 2.72 | 0.12 | -4.54 |
| IPI00418163 | C4B1                             | R.VFREFHLHLR.L                    | 3 | 3.52 | 0.16 | -2.35 |
| IPI00418163 | C4B1                             | R.VGDTLNLNLR.A                    | 1 | 2.45 | 0.19 | -3.63 |
| IPI00418163 | C4B1                             | R.VGDTLNLNLR.A                    | 2 | 3.88 | 0.28 | -4.23 |
| IPI00418163 | C4B1                             | R.VQQPDCREPFLSCCQFAESLR.K         | 2 | 3.08 | 0.31 |       |
| IPI00418163 | C4B1                             | R.VQQPDCREPFLSCCQFAESLR.K         | 3 | 5.06 | 0.53 | -2.44 |
| IPI00418163 | C4B1                             | R.VQQPDCREPFLSCCQFAESLRK.K        | 3 | 5.12 | 0.27 |       |
| IPI00418163 | C4B1                             | R.VTASDPLDTLGSEGALSPGGVASLLR.L    | 2 | 6.71 | 0.56 | -5.11 |
| IPI00418163 | C4B1                             | R.VTASDPLDTLGSEGALSPGGVASLLR.L    | 3 | 7.64 | 0.51 | -6.95 |
| IPI00418163 | C4B1                             | R.VTASDPLDTLGSEGALSPGGVASLLRLPR.G | 3 | 4.78 | 0.50 | -3.68 |
| IPI00418163 | C4B1                             | R.VTASDPLDTLGSEGALSPGGVASLLRLPR.G | 4 | 3.56 | 0.41 | -3.75 |
| IPI00418163 | C4B1                             | R.YIYGKPVQGVAY.V                  | 2 | 3.06 | 0.41 | -3.37 |
| IPI00418163 | C4B1                             | R.YIYGKPVQGVAYVR.F                | 2 | 4.19 | 0.54 | -4.05 |
| IPI00418163 | C4B1                             | R.YIYGKPVQGVAYVR.F                | 3 | 3.33 | 0.48 | -2.45 |
| IPI00418163 | C4B1                             | R.YLDKTEQWSTLPPETK.D              | 2 | 3.68 | 0.45 | -4.38 |
| IPI00418163 | C4B1                             | R.YLDKTEQWSTLPPETK.D              | 3 | 3.49 | 0.28 | -2.04 |
| IPI00418163 | C4B1                             | R.YRVFALDQK.M                     | 1 | 2.09 | 0.16 | -2.31 |
| IPI00418163 | C4B1                             | R.YRVFALDQK.M                     | 2 | 2.64 | 0.14 | -0.54 |
| IPI00418163 | C4B1                             | R.YVSHFETEGPHVLLYFDSVPTSR.E       | 2 | 5.75 | 0.62 | -4.15 |
| IPI00418163 | C4B1                             | R.YVSHFETEGPHVLLYFDSVPTSR.E       | 3 | 5.10 | 0.55 | -6.74 |
| IPI00418163 | C4B1                             | S.PGGVASLLR.L                     | 2 | 3.15 | 0.15 | -3.95 |
| IPI00418163 | C4B1                             | T.PGKPYILTVPGHLDLDEM*QLDIQAR.Y    | 3 | 4.71 | 0.40 | -2.09 |
| IPI00418163 | C4B1                             | V.DFTLSSERDFALLSLQVPLKDAK.S       | 3 | 4.21 | 0.29 | -2.73 |
| IPI00418163 | C4B1                             | V.GSGATFSHYYYM*ILSR.G             | 2 | 3.83 | 0.43 | -4.82 |
| IPI00418163 | C4B1                             | V.PGAPFLLQALVR.E                  | 1 | 2.24 | 0.19 | -4.50 |
| IPI00418163 | C4B1                             | W.LLSQQQADGSGFQDLSPVIHR.S         | 2 | 4.81 | 0.47 | -2.60 |
| IPI00418163 | C4B1                             | W.LLSQQQADGSGFQDLSPVIHR.S         | 3 | 4.99 | 0.57 | -2.87 |
| IPI00418163 | C4B1                             | W.YFVSSPFLDLSK.T                  | 2 | 3.03 | 0.25 | -0.93 |
| IPI00418163 | C4B1                             | Y.ILTVPGHLDLDEM*QLDIQAR.Y         | 2 | 3.61 | 0.28 | -1.12 |
| IPI00418169 | annexin A2 isoform 1             | K.AYTNFDAERDALNIETAIK.T           | 3 | 3.42 | 0.27 | -2.34 |
| IPI00418169 | annexin A2 isoform 1             | R.TNQELQEINR.V                    | 2 | 3.60 | 0.16 | -2.27 |
| IPI00418262 | Fructose-bisphosphate aldolase C | K.DDNGVPFVR.T                     | 1 | 2.16 | 0.11 | -3.77 |
| IPI00418262 | Fructose-bisphosphate aldolase C | K.DDNGVPFVR.T                     | 2 | 2.94 | 0.21 | -2.41 |
| IPI00418262 | Fructose-bisphosphate aldolase C | K.ELSDIALR.I                      | 1 | 2.14 | 0.19 | -3.43 |
| IPI00418262 | Fructose-bisphosphate aldolase C | K.ELSDIALR.I                      | 2 | 1.69 | 0.09 | -2.74 |
| IPI00418262 | Fructose-bisphosphate aldolase C | K.GILAADESVMGSM*AK.R              | 2 | 4.64 | 0.41 | -1.89 |
| IPI00418262 | Fructose-bisphosphate aldolase C | K.GVVPLAGTDGETTTQGLDGLSER.C       | 2 | 5.97 | 0.53 | -3.38 |
| IPI00418262 | Fructose-bisphosphate aldolase C | K.GVVPLAGTDGETTTQGLDGLSER.C       | 3 | 4.77 | 0.48 | -4.54 |
| IPI00418262 | Fructose-bisphosphate aldolase C | K.ISERTPSALAIENANVLAR.Y           | 3 | 3.39 | 0.23 | -2.28 |
| IPI00418262 | Fructose-bisphosphate aldolase C | K.KDGADFAK.W                      | 2 | 2.14 | 0.07 | -3.90 |

|             |                                                                |                                     |   |      |      |       |
|-------------|----------------------------------------------------------------|-------------------------------------|---|------|------|-------|
| IPI00418262 | Fructose-bisphosphate aldolase C                               | K.KELSDIALR.I                       | 2 | 2.36 | 0.16 | -1.84 |
| IPI00418262 | Fructose-bisphosphate aldolase C                               | K.RAEVNGLAAQGK.Y                    | 2 | 3.90 | 0.27 | -3.64 |
| IPI00418262 | Fructose-bisphosphate aldolase C                               | K.RAEVNGLAAQGK.Y                    | 3 | 2.87 | 0.08 | -2.84 |
| IPI00418262 | Fructose-bisphosphate aldolase C                               | K.RAEVNGLAAQGKYEG.S                 | 2 | 4.07 | 0.42 | -3.33 |
| IPI00418262 | Fructose-bisphosphate aldolase C                               | K.RAEVNGLAAQGKYEG.S                 | 3 | 3.71 | 0.41 | -1.91 |
| IPI00418262 | Fructose-bisphosphate aldolase C                               | K.RLSQIGVENTEENRR.L                 | 2 | 2.90 | 0.10 | -5.42 |
| IPI00418262 | Fructose-bisphosphate aldolase C                               | K.RLSQIGVENTEENRR.L                 | 3 | 3.67 | 0.30 | -3.94 |
| IPI00418262 | Fructose-bisphosphate aldolase C                               | K.VDKGVVPLAGTDGETTTQGLDGLSER.C      | 2 | 4.57 | 0.60 | -3.26 |
| IPI00418262 | Fructose-bisphosphate aldolase C                               | K.VDKGVVPLAGTDGETTTQGLDGLSER.C      | 3 | 5.57 | 0.53 | -3.50 |
| IPI00418262 | Fructose-bisphosphate aldolase C                               | K.VLAAVYK.A                         | 1 | 2.13 | 0.18 | -2.77 |
| IPI00418262 | Fructose-bisphosphate aldolase C                               | K.YTPEEIAM*ATVTALR.R                | 2 | 4.27 | 0.43 | -6.02 |
| IPI00418262 | Fructose-bisphosphate aldolase C                               | K.YTPEEIAM*ATVTALR.R                | 3 | 3.57 | 0.32 | -3.65 |
| IPI00418262 | Fructose-bisphosphate aldolase C                               | M.PHSYPALSAEQKK.E                   | 2 | 2.95 | 0.24 | -4.50 |
| IPI00418262 | Fructose-bisphosphate aldolase C                               | R.AEVNGLAAQGK.Y                     | 1 | 2.27 | 0.32 | -3.13 |
| IPI00418262 | Fructose-bisphosphate aldolase C                               | R.AEVNGLAAQGK.Y                     | 2 | 3.37 | 0.30 | -3.72 |
| IPI00418262 | Fructose-bisphosphate aldolase C                               | R.AEVNGLAAQGKYEG.S                  | 2 | 2.92 | 0.48 | -4.04 |
| IPI00418262 | Fructose-bisphosphate aldolase C                               | R.ALQASALNAWR.G                     | 2 | 3.45 | 0.36 | -2.03 |
| IPI00418262 | Fructose-bisphosphate aldolase C                               | R.CPLPRPWALTFSYGR.A                 | 3 | 4.16 | 0.37 | -4.67 |
| IPI00418262 | Fructose-bisphosphate aldolase C                               | R.DNAGAATEEFIK.R                    | 1 | 2.57 | 0.32 | -3.53 |
| IPI00418262 | Fructose-bisphosphate aldolase C                               | R.DNAGAATEEFIK.R                    | 2 | 4.14 | 0.48 | -2.58 |
| IPI00418262 | Fructose-bisphosphate aldolase C                               | R.DNAGAATEEFIKR.A                   | 2 | 3.66 | 0.41 | -1.90 |
| IPI00418262 | Fructose-bisphosphate aldolase C                               | R.DNAGAATEEFIKR.A                   | 3 | 2.88 | 0.28 | -1.99 |
| IPI00418262 | Fructose-bisphosphate aldolase C                               | R.IVAPGKGLAADESVGSM*AK.R            | 3 | 4.31 | 0.44 | -2.62 |
| IPI00418262 | Fructose-bisphosphate aldolase C                               | R.LSQIGVENTEENRR.L                  | 2 | 2.22 | 0.06 | -3.04 |
| IPI00418262 | Fructose-bisphosphate aldolase C                               | R.LSQIGVENTEENRR.L                  | 3 | 2.03 | 0.11 | -3.52 |
| IPI00418262 | Fructose-bisphosphate aldolase C                               | R.QVLFSADDR.V                       | 2 | 2.50 | 0.27 | -2.17 |
| IPI00418262 | Fructose-bisphosphate aldolase C                               | R.QVLFSADDRVK.K                     | 2 | 2.58 | 0.29 | -2.34 |
| IPI00418262 | Fructose-bisphosphate aldolase C                               | R.TPSALAIENANVLAR.Y                 | 2 | 5.03 | 0.36 | -4.59 |
| IPI00418262 | Fructose-bisphosphate aldolase C                               | R.TPSALAIENANVLAR.Y                 | 3 | 5.42 | 0.38 | -4.30 |
| IPI00418262 | Fructose-bisphosphate aldolase C                               | R.TVPPAVPGVTFLLSGGQSEEEASFNLNAINR.C | 3 | 4.73 | 0.42 | -4.56 |
| IPI00418262 | Fructose-bisphosphate aldolase C                               | R.YASICQQNGIVPIVEPEILPDGDHDLK.R     | 3 | 5.54 | 0.40 | -3.38 |
| IPI00418262 | Fructose-bisphosphate aldolase C                               | R.YASICQQNGIVPIVEPEILPDGDHDLK.R.C   | 3 | 5.22 | 0.45 | -2.41 |
| IPI00418262 | Fructose-bisphosphate aldolase C                               | V.PIVEPEILPDGDHDLKR.C               | 2 | 4.43 | 0.48 | -3.39 |
| IPI00418446 | N-acylsphingosine amidohydrolase (acid ceramidase) 1 isoform b | K.ESLDVYELDAK.Q                     | 2 | 3.61 | 0.34 | -1.32 |
| IPI00418446 | N-acylsphingosine amidohydrolase (acid ceramidase) 1 isoform b | K.GQFETYLR.D                        | 2 | 1.96 | 0.08 | -3.47 |
| IPI00418446 | N-acylsphingosine amidohydrolase (acid ceramidase) 1 isoform b | K.GQFETYLRDCPDPCIGW.-               | 2 | 2.66 | 0.11 |       |
| IPI00418446 | N-acylsphingosine amidohydrolase (acid ceramidase) 1 isoform b | K.IM*QVVDEKLPGLLGNFPGFEEEM*K.G      | 3 | 4.48 | 0.23 |       |

|             |                                                                |                                 |   |      |      |       |
|-------------|----------------------------------------------------------------|---------------------------------|---|------|------|-------|
| IPI00418446 | N-acylsphingosine amidohydrolase (acid ceramidase) 1 isoform b | K.LTVYTTLIDVTK.G                | 2 | 4.11 | 0.45 | -6.52 |
| IPI00418446 | N-acylsphingosine amidohydrolase (acid ceramidase) 1 isoform b | K.NM*INTFVPSGK.V                | 2 | 3.08 | 0.34 | 0.29  |
| IPI00418446 | N-acylsphingosine amidohydrolase (acid ceramidase) 1 isoform b | K.STYPPSGPTYR.G                 | 2 | 2.48 | 0.44 | -3.28 |
| IPI00418446 | N-acylsphingosine amidohydrolase (acid ceramidase) 1 isoform b | K.VIVNSLK.N                     | 1 | 1.50 | 0.14 | -2.16 |
| IPI00418446 | N-acylsphingosine amidohydrolase (acid ceramidase) 1 isoform b | R.DRKESLDVYELDAK.Q              | 2 | 2.49 | 0.20 | -0.43 |
| IPI00418446 | N-acylsphingosine amidohydrolase (acid ceramidase) 1 isoform b | R.KSTYPPSGPTYR.G                | 2 | 2.10 | 0.06 | -3.56 |
| IPI00418446 | N-acylsphingosine amidohydrolase (acid ceramidase) 1 isoform b | R.TSQENISFETM*YDVLSTKPVLNK.L    | 3 | 3.15 | 0.32 | -3.81 |
| IPI00418446 | N-acylsphingosine amidohydrolase (acid ceramidase) 1 isoform b | R.WYVVQTNYDR.W                  | 2 | 2.96 | 0.31 | -2.55 |
| IPI00418471 | Vimentin                                                       | K.FADLSEAANR.N                  | 2 | 3.69 | 0.40 | -1.60 |
| IPI00418471 | Vimentin                                                       | K.ILLAELEQLK.G                  | 2 | 3.08 | 0.26 | -2.04 |
| IPI00418471 | Vimentin                                                       | K.ILLAELEQLKGQK.S               | 2 | 3.43 | 0.38 | -2.09 |
| IPI00418471 | Vimentin                                                       | K.LLEGEESR.I                    | 2 | 2.26 | 0.06 | -3.07 |
| IPI00418471 | Vimentin                                                       | R.EEAENTLQSFQRQVDNASLAR.L       | 3 | 2.97 | 0.13 | -2.22 |
| IPI00418471 | Vimentin                                                       | R.EMEENFAVEAANYQDTIGR.L         | 2 | 5.41 | 0.50 | -3.87 |
| IPI00418471 | Vimentin                                                       | R.ISLPLPNFSSLNLR.E              | 2 | 2.87 | 0.28 | -2.92 |
| IPI00418471 | Vimentin                                                       | R.KVESLQEEIAFLK.K               | 2 | 3.60 | 0.23 | -3.48 |
| IPI00418471 | Vimentin                                                       | R.KVESLQEEIAFLK.L               | 2 | 4.65 | 0.34 | -4.47 |
| IPI00418471 | Vimentin                                                       | R.KVESLQEEIAFLK.L               | 3 | 4.47 | 0.34 | -2.52 |
| IPI00418471 | Vimentin                                                       | R.LGDLYEEEM*R.E                 | 2 | 2.99 | 0.24 |       |
| IPI00418471 | Vimentin                                                       | R.LLQDSVDFSLADAINTEFK.N         | 2 | 5.32 | 0.51 | -4.05 |
| IPI00418471 | Vimentin                                                       | R.LQDEIQNM*KEEM*AR.H            | 3 | 2.45 | 0.27 | -1.31 |
| IPI00418471 | Vimentin                                                       | R.QDVDNASLAR.L                  | 2 | 2.45 | 0.22 | -3.19 |
| IPI00418471 | Vimentin                                                       | R.TNEKVELQELNDR.F               | 2 | 3.01 | 0.27 | -2.86 |
| IPI00418471 | Vimentin                                                       | R.TNEKVELQELNDR.F               | 3 | 4.93 | 0.28 | -2.28 |
| IPI00418471 | Vimentin                                                       | R.TNEKVELQELNDRFANYIDKVR.F      | 4 | 4.25 | 0.30 | -2.48 |
| IPI00418471 | Vimentin                                                       | R.TNEKVELQELNDRFANYIDKVR.F      | 5 | 3.22 | 0.24 | -1.21 |
| IPI00418531 | Isoform 1 of Gliomedin                                         | K.AGNAFIAR.G                    | 2 | 3.00 | 0.14 | -1.11 |
| IPI00418531 | Isoform 1 of Gliomedin                                         | K.ASEHHSPAESM*ITSIGNPVQVLK.V    | 3 | 4.39 | 0.42 | -1.30 |
| IPI00418531 | Isoform 1 of Gliomedin                                         | K.ASEHHSPAESM*ITSIGNPVQVLK.V    | 4 | 3.85 | 0.27 | -1.42 |
| IPI00418531 | Isoform 1 of Gliomedin                                         | K.LENALYFDRK.Y                  | 2 | 3.07 | 0.30 | -2.85 |
| IPI00418531 | Isoform 1 of Gliomedin                                         | K.VTETFGTWIR.E                  | 2 | 3.94 | 0.30 | -2.93 |
| IPI00418531 | Isoform 1 of Gliomedin                                         | K.YLFANSK.T                     | 2 | 1.74 | 0.15 | -2.19 |
| IPI00418531 | Isoform 1 of Gliomedin                                         | R.DQHLYSWEDGHLM*LYPVQFLSTTLNQ.- | 3 | 3.95 | 0.31 | -3.66 |
| IPI00418531 | Isoform 1 of Gliomedin                                         | R.FEFGQETSQTLK.L                | 2 | 3.80 | 0.34 | -2.83 |



|             |                                                              |                                        |   |      |      |       |
|-------------|--------------------------------------------------------------|----------------------------------------|---|------|------|-------|
| IPI00418531 | Isoform 1 of Gliomedin                                       | R.GILYVTDTK.D                          | 1 | 2.47 | 0.16 | -3.18 |
| IPI00418531 | Isoform 1 of Gliomedin                                       | R.GILYVTDTK.D                          | 2 | 2.95 | 0.32 | -4.40 |
| IPI00418531 | Isoform 1 of Gliomedin                                       | R.TSQSVLAM*LAYNM*R.D                   | 2 | 3.46 | 0.42 | -2.85 |
| IPI00418531 | Isoform 1 of Gliomedin                                       | R.TSQSVLAM*LAYNM*R.D                   | 3 | 4.42 | 0.40 | -1.91 |
| IPI00418531 | Isoform 1 of Gliomedin                                       | R.VTFAFDLLGGK.Q                        | 1 | 2.50 | 0.35 | -3.35 |
| IPI00418531 | Isoform 1 of Gliomedin                                       | R.VTFAFDLLGGK.Q                        | 2 | 3.49 | 0.38 | -3.72 |
| IPI00418735 | hypothetical protein LOC400566                               | R.WDGILADPEAEKERIR.I                   | 2 | 2.62 | 0.10 | -2.42 |
| IPI00418960 | Isoform 3 of Protein NDRG4                                   | K.LSGLTSTLPDPTVLSHLFSQEELVNNTLVQSYR.Q  | 3 | 4.76 | 0.33 | -7.09 |
| IPI00418960 | Isoform 3 of Protein NDRG4                                   | K.M*ADSGGLPQVTQPGK.L                   | 2 | 4.12 | 0.36 | -3.01 |
| IPI00418960 | Isoform 3 of Protein NDRG4                                   | R.DLDINRPGTVPNAK.T                     | 2 | 2.88 | 0.24 | -2.27 |
| IPI00419221 | Membrane-bound O-acyltransferase domain-containing protein 2 | K.FDEGENSLGQNSFSTTNVNCNQNEIASRHSSLKQ.- | 3 | 1.64 | 0.13 | -8.50 |
| IPI00419237 | Isoform 1 of Cytosol aminopeptidase                          | K.ASANM*DLM*R.A                        | 2 | 2.41 | 0.22 | -1.79 |
| IPI00419237 | Isoform 1 of Cytosol aminopeptidase                          | K.TIQVDNTDAEGR.L                       | 2 | 3.21 | 0.26 | -4.89 |
| IPI00419253 | Isoform 1 of Nck-associated protein 5                        | K.SSVAVNKSKPEDSK.N                     | 2 | 2.60 | 0.13 |       |
| IPI00419442 | IGLV6-57 protein                                             | A.NFM*LTQPHSVSESPGK.T                  | 2 | 4.97 | 0.06 |       |
| IPI00419442 | IGLV6-57 protein                                             | R.FSGSIDSSNSASLTISGLK.T                | 2 | 2.98 | 0.08 |       |
| IPI00419565 | Isoform 1 of Stabilin-1 precursor                            | R.GLDFLDFLDDELTYK.T                    | 2 | 5.10 | 0.40 |       |
| IPI00419565 | Isoform 1 of Stabilin-1 precursor                            | R.TCTCDAHTVGDGLTCR.A                   | 3 | 2.74 | 0.32 |       |
| IPI00419585 | Peptidyl-prolyl cis-trans isomerase A                        | K.EGM*NIVEAM*ER.F                      | 2 | 2.26 | 0.27 | -2.34 |
| IPI00419585 | Peptidyl-prolyl cis-trans isomerase A                        | K.HTGPGILSM*ANAGPNTNGSQFFICTAK.S       | 3 | 5.75 | 0.44 | -3.52 |
| IPI00419585 | Peptidyl-prolyl cis-trans isomerase A                        | K.KITIADCGQLE.-                        | 2 | 2.86 | 0.28 | -3.75 |
| IPI00419585 | Peptidyl-prolyl cis-trans isomerase A                        | K.SIYGEEKFEDENFILK.H                   | 2 | 4.86 | 0.44 | -3.18 |
| IPI00419585 | Peptidyl-prolyl cis-trans isomerase A                        | K.TEWLDGK.H                            | 1 | 1.66 | 0.13 | -4.92 |
| IPI00419585 | Peptidyl-prolyl cis-trans isomerase A                        | K.TEWLDGK.H                            | 2 | 2.00 | 0.21 | 1.29  |
| IPI00419585 | Peptidyl-prolyl cis-trans isomerase A                        | K.VKEGM*NIVEAM*ER.F                    | 2 | 3.67 | 0.43 | -3.91 |
| IPI00419585 | Peptidyl-prolyl cis-trans isomerase A                        | K.VKEGM*NIVEAM*ER.F                    | 3 | 3.27 | 0.17 | -3.33 |
| IPI00419585 | Peptidyl-prolyl cis-trans isomerase A                        | M.VNPTVFFDIAVDGEPLGR.V                 | 2 | 5.28 | 0.50 | -4.44 |
| IPI00419585 | Peptidyl-prolyl cis-trans isomerase A                        | M.VNPTVFFDIAVDGEPLGR.V                 | 3 | 4.85 | 0.44 | -4.89 |
| IPI00419585 | Peptidyl-prolyl cis-trans isomerase A                        | R.VSFELFADKVPK.T                       | 2 | 3.49 | 0.36 | -2.71 |
| IPI00419585 | Peptidyl-prolyl cis-trans isomerase A                        | R.VSFELFADKVPK.T                       | 3 | 2.52 | 0.35 | -2.07 |
| IPI00419595 | Isoform 1 of Podocalyxin-like protein 2 precursor            | K.DWSNLAGK.N                           | 2 | 2.85 | 0.12 | -2.71 |
| IPI00419595 | Isoform 1 of Podocalyxin-like protein 2 precursor            | K.EQHLLM*TLVGEQGVVPTQDVLISM*LGDIRR.S   | 4 | 3.82 | 0.26 | -1.96 |
| IPI00419595 | Isoform 1 of Podocalyxin-like protein 2 precursor            | P.PQLLALVEEVLP.R.H                     | 2 | 4.09 | 0.39 | -3.86 |
| IPI00419595 | Isoform 1 of Podocalyxin-like protein 2 precursor            | R.DFSLTSSSQTPGATK.S                    | 2 | 4.99 | 0.54 | -3.69 |
| IPI00419595 | Isoform 1 of Podocalyxin-like protein 2 precursor            | R.GPQLLALVEEVLP.R.H                    | 2 | 4.42 | 0.48 | -5.34 |
| IPI00419595 | Isoform 1 of Podocalyxin-like protein 2 precursor            | R.GPQLLALVEEVLP.R.H                    | 3 | 4.37 | 0.39 | -3.46 |
| IPI00419720 | Dermokine gamma-1                                            | A.GPLQSGEESTGTNIGEALGHGLGDALSEGVGK.A   | 3 | 5.44 | 0.49 | -1.78 |
| IPI00419720 | Dermokine gamma-1                                            | K.VSEALQGQTR.E                         | 2 | 3.22 | 0.23 | -1.31 |
| IPI00419720 | Dermokine gamma-1                                            | P.LQSGEESTGTNIGEALGHGLGDALSEGVGK.A     | 3 | 4.06 | 0.41 | -4.16 |
| IPI00419720 | Dermokine gamma-1                                            | R.VGEAAHALGNTGHEIGR.Q                  | 3 | 3.19 | 0.39 | 0.28  |

|             |                                                    |                                               |   |      |      |       |
|-------------|----------------------------------------------------|-----------------------------------------------|---|------|------|-------|
| IPI00419722 | seizure related 6 homolog (mouse)-like 2 isoform 2 | K.AM*CGGELSEPAGVVLSPDWPQSYSPGQDCVWGVHVHVEEK.R | 3 | 5.25 | 0.53 | -2.73 |
| IPI00419722 | seizure related 6 homolog (mouse)-like 2 isoform 2 | K.HHYQAGESLR.F                                | 2 | 2.91 | 0.31 | -3.62 |
| IPI00419722 | seizure related 6 homolog (mouse)-like 2 isoform 2 | K.YEPCLNPGVPENGYQTLTK.H                       | 2 | 2.56 | 0.18 | -1.92 |
| IPI00419722 | seizure related 6 homolog (mouse)-like 2 isoform 2 | R.CLPGYSLEGAAM*LTCYSR.D                       | 2 | 5.52 | 0.58 | -2.59 |
| IPI00419722 | seizure related 6 homolog (mouse)-like 2 isoform 2 | R.EGDM*LTLFDGDGPSAR.V                         | 2 | 4.64 | 0.45 | -3.74 |
| IPI00419722 | seizure related 6 homolog (mouse)-like 2 isoform 2 | R.FEAFEEDR.C                                  | 1 | 2.59 | 0.23 | -4.33 |
| IPI00419722 | seizure related 6 homolog (mouse)-like 2 isoform 2 | R.FEAFEEDR.C                                  | 2 | 2.67 | 0.13 | -3.70 |
| IPI00419722 | seizure related 6 homolog (mouse)-like 2 isoform 2 | R.GLISDAQSLYVELLSETPANPLLSLR.F                | 2 | 4.69 | 0.48 | -3.56 |
| IPI00419722 | seizure related 6 homolog (mouse)-like 2 isoform 2 | R.GLISDAQSLYVELLSETPANPLLSLR.F                | 3 | 6.83 | 0.55 | -5.02 |
| IPI00419722 | seizure related 6 homolog (mouse)-like 2 isoform 2 | R.GLISDAQSLYVELLSETPANPLLSLR.F                | 4 | 4.79 | 0.45 | -2.80 |
| IPI00419722 | seizure related 6 homolog (mouse)-like 2 isoform 2 | R.ILLQVEILNVR.E                               | 2 | 3.27 | 0.31 | -3.38 |
| IPI00419722 | seizure related 6 homolog (mouse)-like 2 isoform 2 | R.LLLHFQSPR.V                                 | 1 | 2.16 | 0.15 | -2.72 |
| IPI00419722 | seizure related 6 homolog (mouse)-like 2 isoform 2 | R.LLLHFQSPR.V                                 | 2 | 2.52 | 0.33 | -3.04 |
| IPI00419722 | seizure related 6 homolog (mouse)-like 2 isoform 2 | R.LLSSGPDLTQFQAPPGPPNPGLGQGFVLHFK.E           | 3 | 5.06 | 0.52 | -3.32 |
| IPI00419722 | seizure related 6 homolog (mouse)-like 2 isoform 2 | R.SGGSPLSPVIYDSDM*DDVPER.G                    | 2 | 4.92 | 0.56 | -5.11 |
| IPI00419722 | seizure related 6 homolog (mouse)-like 2 isoform 2 | R.SGGSPLSPVIYDSDM*DDVPER.G                    | 3 | 3.33 | 0.35 | -5.47 |
| IPI00419722 | seizure related 6 homolog (mouse)-like 2 isoform 2 | R.TASDAGFPVGSVQYR.C                           | 2 | 3.76 | 0.47 | -2.92 |
| IPI00419722 | seizure related 6 homolog (mouse)-like 2 isoform 2 | R.TASDAGFPVGSVQYR.C                           | 3 | 2.50 | 0.14 | -1.89 |
| IPI00419722 | seizure related 6 homolog (mouse)-like 2 isoform 2 | R.TASHGDLIR.G                                 | 1 | 2.40 | 0.14 | -4.22 |
| IPI00419722 | seizure related 6 homolog (mouse)-like 2 isoform 2 | R.TASHGDLIR.G                                 | 2 | 2.44 | 0.22 | -0.87 |
| IPI00419722 | seizure related 6 homolog (mouse)-like 2 isoform 2 | R.VLAQLRGPQPR.R                               | 2 | 2.74 | 0.30 | -1.89 |

|             |                                                                            |                                     |   |      |      |       |
|-------------|----------------------------------------------------------------------------|-------------------------------------|---|------|------|-------|
| IPI00419722 | seizure related 6 homolog (mouse)-like 2 isoform 2                         | R.VSLDEDNDR.L                       | 2 | 2.83 | 0.30 | -5.11 |
| IPI00419722 | seizure related 6 homolog (mouse)-like 2 isoform 2                         | R.VSLDEDNDRLM*VR.S                  | 2 | 2.24 | 0.23 | -4.33 |
| IPI00419722 | seizure related 6 homolog (mouse)-like 2 isoform 2                         | R.VSLDEDNDRLM*VR.S                  | 3 | 2.00 | 0.12 | 0.01  |
| IPI00419722 | seizure related 6 homolog (mouse)-like 2 isoform 2                         | R.WVIEAAEGR.R                       | 2 | 3.14 | 0.22 | -1.86 |
| IPI00419724 | semaphorin 4B precursor                                                    | K.DHFLM*DGQVR.S                     | 2 | 2.38 | 0.27 | 0.73  |
| IPI00419724 | semaphorin 4B precursor                                                    | K.INSSLQLPDR.V                      | 2 | 2.82 | 0.23 | -2.90 |
| IPI00419724 | semaphorin 4B precursor                                                    | K.STALVVDGELYTGTVSSFQGNPAISR.S      | 3 | 7.51 | 0.57 | -2.97 |
| IPI00419724 | semaphorin 4B precursor                                                    | R.DTLFYGVFTSQWHR.G                  | 3 | 2.22 | 0.20 | -1.57 |
| IPI00419724 | semaphorin 4B precursor                                                    | R.GTTEGSAVCVFTM*K.D                 | 2 | 2.97 | 0.34 | -2.99 |
| IPI00419724 | semaphorin 4B precursor                                                    | R.ISLPLGSEERPFLR.F                  | 2 | 2.73 | 0.32 | -3.46 |
| IPI00419724 | semaphorin 4B precursor                                                    | R.ISLPLGSEERPFLR.F                  | 3 | 1.77 | 0.16 | -1.14 |
| IPI00419724 | semaphorin 4B precursor                                                    | R.KINSSLQLPDR.V                     | 2 | 3.49 | 0.32 | -1.17 |
| IPI00419724 | semaphorin 4B precursor                                                    | R.M*LLLQPQAR.Y                      | 2 | 3.10 | 0.20 | -2.14 |
| IPI00419724 | semaphorin 4B precursor                                                    | R.SCGDCLLAR.D                       | 2 | 3.04 | 0.22 | -0.65 |
| IPI00419724 | semaphorin 4B precursor                                                    | R.VFSGLYK.E                         | 1 | 1.73 | 0.06 | -1.19 |
| IPI00419724 | semaphorin 4B precursor                                                    | R.VHIIELQIFSSGQPVQNLLDTHR.G         | 4 | 2.95 | 0.20 | -3.30 |
| IPI00419724 | semaphorin 4B precursor                                                    | R.VLNFLKDHFLM*DGQVR.S               | 4 | 3.40 | 0.23 | -1.83 |
| IPI00419724 | semaphorin 4B precursor                                                    | R.VPGLHHTYDVLFLGTGDGR.L             | 2 | 5.30 | 0.57 | -3.49 |
| IPI00419724 | semaphorin 4B precursor                                                    | R.VPGLHHTYDVLFLGTGDGR.L             | 3 | 2.92 | 0.25 | -3.85 |
| IPI00419724 | semaphorin 4B precursor                                                    | R.VPGLHHTYDVLFLGTGDGR.L             | 4 | 2.34 | 0.12 | -3.58 |
| IPI00419836 | Isoform 1 of Discoidin, CUB and LCCL domain-containing protein 2 precursor | R.NNFLPPIAR.F                       | 2 | 2.39 | 0.15 | -1.12 |
| IPI00419908 | Uncharacterized protein GPR179                                             | R.ALGAEAIR.K                        | 1 | 1.69 | 0.06 | -2.63 |
| IPI00419966 | Isoform 2 of Target of Nesh-SH3 precursor                                  | K.FYNIQDQR.G                        | 2 | 3.02 | 0.19 | -1.25 |
| IPI00419966 | Isoform 2 of Target of Nesh-SH3 precursor                                  | K.NPLGEGPVSNTVAFSTESADPR.V          | 2 | 5.07 | 0.58 | -4.95 |
| IPI00419966 | Isoform 2 of Target of Nesh-SH3 precursor                                  | R.FKGPHVR.Y                         | 2 | 1.83 | 0.11 | -5.09 |
| IPI00419966 | Isoform 2 of Target of Nesh-SH3 precursor                                  | R.TGQQLTSDQLPIKEYFR.A               | 3 | 4.32 | 0.36 | -2.27 |
| IPI00419966 | Isoform 2 of Target of Nesh-SH3 precursor                                  | R.VSEPVSAGR.D                       | 2 | 2.64 | 0.27 | -2.49 |
| IPI00420014 | Isoform 1 of U5 small nuclear ribonucleoprotein 200 kDa helicase           | -.M*ADVTAR.S                        | 1 | 1.14 | 0.11 | -2.34 |
| IPI00420071 | microtubule-associated protein 6 isoform 1                                 | R.EPAAGPGR.S                        | 1 | 1.69 | 0.19 | -8.92 |
| IPI00423461 | Putative uncharacterized protein DKFZp686C02220 (Fragment)                 | K.SAVQGPPER.D                       | 2 | 2.30 | 0.12 | 0.79  |
| IPI00423461 | Putative uncharacterized protein DKFZp686C02220 (Fragment)                 | K.SGNTFRPEVHLLPPPSEELALNELVLTCLAR.G | 2 | 4.32 | 0.41 |       |
| IPI00423461 | Putative uncharacterized protein DKFZp686C02220 (Fragment)                 | K.SGNTFRPEVHLLPPPSEELALNELVLTCLAR.G | 3 | 6.86 | 0.60 |       |

|             |                                                            |                                    |   |      |      |       |
|-------------|------------------------------------------------------------|------------------------------------|---|------|------|-------|
| IPI00423461 | Putative uncharacterized protein DKFZp686C02220 (Fragment) | R.DASGATFTWTPSSGK.S                | 2 | 4.55 | 0.44 |       |
| IPI00423461 | Putative uncharacterized protein DKFZp686C02220 (Fragment) | R.GFSPKDVLR.W                      | 2 | 2.81 | 0.13 |       |
| IPI00423461 | Putative uncharacterized protein DKFZp686C02220 (Fragment) | R.NFPPSQDASGDLYTTSSQLTLPATQCPDGK.S | 2 | 3.66 | 0.39 |       |
| IPI00423461 | Putative uncharacterized protein DKFZp686C02220 (Fragment) | R.NFPPSQDASGDLYTTSSQLTLPATQCPDGK.S | 3 | 5.98 | 0.54 |       |
| IPI00423461 | Putative uncharacterized protein DKFZp686C02220 (Fragment) | R.VAAEDWK.K                        | 2 | 2.23 | 0.16 |       |
| IPI00423461 | Putative uncharacterized protein DKFZp686C02220 (Fragment) | R.VTM*TTDTSTSTAYM*ELR.S            | 2 | 5.33 | 0.47 |       |
| IPI00423461 | Putative uncharacterized protein DKFZp686C02220 (Fragment) | R.VTM*TTDTSTSTAYMELR.S             | 2 | 5.15 | 0.48 |       |
| IPI00423461 | Putative uncharacterized protein DKFZp686C02220 (Fragment) | R.VTMTTDTSTSTAYMELR.S              | 2 | 4.05 | 0.35 |       |
| IPI00423461 | Putative uncharacterized protein DKFZp686C02220 (Fragment) | R.WLQGSQELPR.E                     | 1 | 3.00 | 0.19 |       |
| IPI00423461 | Putative uncharacterized protein DKFZp686C02220 (Fragment) | R.WLQGSQELPR.E                     | 2 | 3.80 | 0.33 |       |
| IPI00423461 | Putative uncharacterized protein DKFZp686C02220 (Fragment) | R.WLQGSQELPREK.Y                   | 2 | 2.71 | 0.15 |       |
| IPI00423463 | Putative uncharacterized protein DKFZp686O01196            | C.DKTHTCPPCPAPELLGGPSVFLFPPKPK.D   | 3 | 6.55 | 0.38 |       |
| IPI00423463 | Putative uncharacterized protein DKFZp686O01196            | K.ALPAPIEK.T                       | 1 | 1.81 | 0.11 |       |
| IPI00423463 | Putative uncharacterized protein DKFZp686O01196            | K.CKVSINKALPAPIEK.T                | 2 | 2.28 | 0.15 |       |
| IPI00423463 | Putative uncharacterized protein DKFZp686O01196            | K.DTLM*ISR.T                       | 2 | 2.48 | 0.09 | -3.74 |
| IPI00423463 | Putative uncharacterized protein DKFZp686O01196            | K.DTLMISR.T                        | 1 | 2.38 | 0.13 |       |
| IPI00423463 | Putative uncharacterized protein DKFZp686O01196            | K.DTLMISR.T                        | 2 | 2.45 | 0.16 |       |
| IPI00423463 | Putative uncharacterized protein DKFZp686O01196            | K.FNWYVDGVEVHNAK.T                 | 1 | 3.93 | 0.41 |       |
| IPI00423463 | Putative uncharacterized protein DKFZp686O01196            | K.FNWYVDGVEVHNAK.T                 | 2 | 5.51 | 0.51 |       |
| IPI00423463 | Putative uncharacterized protein DKFZp686O01196            | K.FNWYVDGVEVHNAK.T                 | 3 | 3.99 | 0.38 |       |
| IPI00423463 | Putative uncharacterized protein DKFZp686O01196            | K.GFYPSDIAVEWESNGQPENNYK.T         | 2 | 4.88 | 0.31 |       |

|             |                                                 |                                            |   |      |      |       |
|-------------|-------------------------------------------------|--------------------------------------------|---|------|------|-------|
| IPI00423463 | Putative uncharacterized protein DKFZp686O01196 | K.GFYPSDIAVEWESNGQPENNYK.T                 | 3 | 4.56 | 0.26 |       |
| IPI00423463 | Putative uncharacterized protein DKFZp686O01196 | K.GFYPSDIAVEWESNGQPENNYKTPPVLDSDGSFFLYSK.L | 3 | 4.64 | 0.25 |       |
| IPI00423463 | Putative uncharacterized protein DKFZp686O01196 | K.GPSVFPLAPSSK.S                           | 1 | 3.15 | 0.35 |       |
| IPI00423463 | Putative uncharacterized protein DKFZp686O01196 | K.GPSVFPLAPSSK.S                           | 2 | 3.30 | 0.36 |       |
| IPI00423463 | Putative uncharacterized protein DKFZp686O01196 | K.GPSVFPLAPSSKSTSGGTAALGCLVK.D             | 2 | 4.62 | 0.48 |       |
| IPI00423463 | Putative uncharacterized protein DKFZp686O01196 | K.GPSVFPLAPSSKSTSGGTAALGCLVK.D             | 3 | 4.18 | 0.48 |       |
| IPI00423463 | Putative uncharacterized protein DKFZp686O01196 | K.GQPREPQVYTLPPSR.E                        | 2 | 2.89 | 0.13 |       |
| IPI00423463 | Putative uncharacterized protein DKFZp686O01196 | K.GQPREPQVYTLPPSR.E                        | 3 | 2.92 | 0.17 |       |
| IPI00423463 | Putative uncharacterized protein DKFZp686O01196 | K.GQPREPQVYTLPPSRDELTK.N                   | 3 | 4.51 | 0.32 |       |
| IPI00423463 | Putative uncharacterized protein DKFZp686O01196 | K.NQVSLTCLVK.G                             | 1 | 2.26 | 0.22 |       |
| IPI00423463 | Putative uncharacterized protein DKFZp686O01196 | K.NQVSLTCLVK.G                             | 2 | 2.44 | 0.28 | -2.15 |
| IPI00423463 | Putative uncharacterized protein DKFZp686O01196 | K.SCDKHTCPCPAPELLGGPSVFLFPPKPK.D           | 3 | 6.71 | 0.47 |       |
| IPI00423463 | Putative uncharacterized protein DKFZp686O01196 | K.THTCPCPAPELLGGPSVFLFPPKPK.D              | 2 | 3.81 | 0.39 |       |
| IPI00423463 | Putative uncharacterized protein DKFZp686O01196 | K.THTCPCPAPELLGGPSVFLFPPKPK.D              | 3 | 6.29 | 0.52 |       |
| IPI00423463 | Putative uncharacterized protein DKFZp686O01196 | K.TKPREEQYNSTYR.V                          | 2 | 2.99 | 0.10 |       |
| IPI00423463 | Putative uncharacterized protein DKFZp686O01196 | K.TTPPVLDSDGSFFLYSK.L                      | 1 | 3.22 | 0.41 |       |
| IPI00423463 | Putative uncharacterized protein DKFZp686O01196 | K.TTPPVLDSDGSFFLYSK.L                      | 2 | 3.42 | 0.37 |       |
| IPI00423463 | Putative uncharacterized protein DKFZp686O01196 | K.TTPPVLDSDGSFFLYSK.L                      | 3 | 4.11 | 0.39 |       |
| IPI00423463 | Putative uncharacterized protein DKFZp686O01196 | K.VSNKALPAPIEK.T                           | 2 | 3.33 | 0.18 |       |
| IPI00423463 | Putative uncharacterized protein DKFZp686O01196 | K.WYVDGVEVHNAK.T                           | 1 | 2.91 | 0.35 |       |
| IPI00423463 | Putative uncharacterized protein DKFZp686O01196 | K.WYVDGVEVHNAK.T                           | 2 | 3.90 | 0.46 |       |

|             |                                                 |                                  |   |      |      |       |
|-------------|-------------------------------------------------|----------------------------------|---|------|------|-------|
| IPI00423463 | Putative uncharacterized protein DKFZp686O01196 | K.WYVDGVEVHNAK.T                 | 3 | 2.99 | 0.21 |       |
| IPI00423463 | Putative uncharacterized protein DKFZp686O01196 | R.CPAPELLGGPSVFLFPPKPK.D         | 2 | 4.00 | 0.37 |       |
| IPI00423463 | Putative uncharacterized protein DKFZp686O01196 | R.CPAPELLGGPSVFLFPPKPK.D         | 3 | 6.31 | 0.49 |       |
| IPI00423463 | Putative uncharacterized protein DKFZp686O01196 | R.CPAPELLGGPSVFLFPPKPKDTLM*ISR.T | 3 | 3.77 | 0.23 |       |
| IPI00423463 | Putative uncharacterized protein DKFZp686O01196 | R.EPQVYTLPPSRDELTK.N             | 2 | 3.97 | 0.21 |       |
| IPI00423463 | Putative uncharacterized protein DKFZp686O01196 | R.EPQVYTLPPSRDELTKNQVSLTCLVK.G   | 3 | 4.03 | 0.23 |       |
| IPI00423463 | Putative uncharacterized protein DKFZp686O01196 | R.LSCAASGFTFR.S                  | 2 | 3.55 | 0.31 |       |
| IPI00423463 | Putative uncharacterized protein DKFZp686O01196 | R.LSCAASGFTFRSFNMNVVR.Q          | 3 | 3.58 | 0.10 |       |
| IPI00423463 | Putative uncharacterized protein DKFZp686O01196 | R.STSGGTAALGCLVK.D               | 1 | 2.45 | 0.34 |       |
| IPI00423463 | Putative uncharacterized protein DKFZp686O01196 | R.STSGGTAALGCLVK.D               | 2 | 4.37 | 0.45 |       |
| IPI00423463 | Putative uncharacterized protein DKFZp686O01196 | R.TPEVTCVVVDVSHED.P              | 2 | 5.50 | 0.52 |       |
| IPI00423463 | Putative uncharacterized protein DKFZp686O01196 | R.VDDTAIYYCAR.G                  | 2 | 3.93 | 0.21 |       |
| IPI00423463 | Putative uncharacterized protein DKFZp686O01196 | R.VVSVLTVLHQDWLNGK.E             | 1 | 4.22 | 0.41 |       |
| IPI00423463 | Putative uncharacterized protein DKFZp686O01196 | R.VVSVLTVLHQDWLNGK.E             | 2 | 5.39 | 0.46 |       |
| IPI00423463 | Putative uncharacterized protein DKFZp686O01196 | R.VVSVLTVLHQDWLNGK.E             | 3 | 3.42 | 0.38 |       |
| IPI00423463 | Putative uncharacterized protein DKFZp686O01196 | R.VVSVLTVLHQDWLNGKEYK.C          | 2 | 5.56 | 0.40 |       |
| IPI00423463 | Putative uncharacterized protein DKFZp686O01196 | R.VVSVLTVLHQDWLNGKEYK.C          | 3 | 4.97 | 0.40 |       |
| IPI00423466 | Putative uncharacterized protein DKFZp686H20196 | C.DKTHTCPPCPAPELLGGPSVFLFPPKPK.D | 3 | 6.55 | 0.38 |       |
| IPI00423466 | Putative uncharacterized protein DKFZp686H20196 | K.ALPAPIEK.T                     | 1 | 1.81 | 0.11 |       |
| IPI00423466 | Putative uncharacterized protein DKFZp686H20196 | K.CKVSNKALPAPIEK.T               | 2 | 2.28 | 0.15 |       |
| IPI00423466 | Putative uncharacterized protein DKFZp686H20196 | K.DTLM*ISR.T                     | 2 | 2.48 | 0.09 | -3.74 |

|             |                                                 |                                             |   |      |      |       |
|-------------|-------------------------------------------------|---------------------------------------------|---|------|------|-------|
| IPI00423466 | Putative uncharacterized protein DKFZp686H20196 | K.DTLMISR.T                                 | 1 | 2.38 | 0.13 |       |
| IPI00423466 | Putative uncharacterized protein DKFZp686H20196 | K.DTLMISR.T                                 | 2 | 2.45 | 0.16 |       |
| IPI00423466 | Putative uncharacterized protein DKFZp686H20196 | K.FNWWYVDGVEVHNAK.T                         | 1 | 3.93 | 0.41 |       |
| IPI00423466 | Putative uncharacterized protein DKFZp686H20196 | K.FNWWYVDGVEVHNAK.T                         | 2 | 5.51 | 0.51 |       |
| IPI00423466 | Putative uncharacterized protein DKFZp686H20196 | K.FNWWYVDGVEVHNAK.T                         | 3 | 3.99 | 0.38 |       |
| IPI00423466 | Putative uncharacterized protein DKFZp686H20196 | K.GFYPSDIAVEWESNGQPENNYK.T                  | 2 | 4.88 | 0.31 |       |
| IPI00423466 | Putative uncharacterized protein DKFZp686H20196 | K.GFYPSDIAVEWESNGQPENNYK.T                  | 3 | 4.56 | 0.26 |       |
| IPI00423466 | Putative uncharacterized protein DKFZp686H20196 | K.GFYPSDIAVEWESNGQPENNYKTTTPVLDSGDSFFLYSK.L | 3 | 4.64 | 0.25 |       |
| IPI00423466 | Putative uncharacterized protein DKFZp686H20196 | K.GPSVFPLAPSSK.S                            | 1 | 3.15 | 0.35 |       |
| IPI00423466 | Putative uncharacterized protein DKFZp686H20196 | K.GPSVFPLAPSSK.S                            | 2 | 3.30 | 0.36 |       |
| IPI00423466 | Putative uncharacterized protein DKFZp686H20196 | K.GPSVFPLAPSSKSTSGGTAALGCLVK.D              | 2 | 4.62 | 0.48 |       |
| IPI00423466 | Putative uncharacterized protein DKFZp686H20196 | K.GPSVFPLAPSSKSTSGGTAALGCLVK.D              | 3 | 4.18 | 0.48 |       |
| IPI00423466 | Putative uncharacterized protein DKFZp686H20196 | K.GQPREPQVYTLPPSR.E                         | 2 | 2.89 | 0.13 |       |
| IPI00423466 | Putative uncharacterized protein DKFZp686H20196 | K.GQPREPQVYTLPPSR.E                         | 3 | 2.92 | 0.17 |       |
| IPI00423466 | Putative uncharacterized protein DKFZp686H20196 | K.GQPREPQVYTLPPSRDELTK.N                    | 3 | 4.51 | 0.32 |       |
| IPI00423466 | Putative uncharacterized protein DKFZp686H20196 | K.NQVSLTCLVK.G                              | 1 | 2.26 | 0.22 |       |
| IPI00423466 | Putative uncharacterized protein DKFZp686H20196 | K.NQVSLTCLVK.G                              | 2 | 2.44 | 0.28 | -2.15 |
| IPI00423466 | Putative uncharacterized protein DKFZp686H20196 | K.SCDKTHTCPAPPELLGGPSVFLFPPKPK.D            | 3 | 6.71 | 0.47 |       |
| IPI00423466 | Putative uncharacterized protein DKFZp686H20196 | K.THTCPPCPAPPELLGGPSVFLFPPKPK.D             | 2 | 3.81 | 0.39 |       |
| IPI00423466 | Putative uncharacterized protein DKFZp686H20196 | K.THTCPPCPAPPELLGGPSVFLFPPKPK.D             | 3 | 6.29 | 0.52 |       |
| IPI00423466 | Putative uncharacterized protein DKFZp686H20196 | K.TKPREEQYNSTYR.V                           | 2 | 2.99 | 0.10 |       |

|             |                                                 |                                  |   |      |      |  |
|-------------|-------------------------------------------------|----------------------------------|---|------|------|--|
| IPI00423466 | Putative uncharacterized protein DKFZp686H20196 | K.TTPPVLDSDGSFFLYSK.L            | 1 | 3.22 | 0.41 |  |
| IPI00423466 | Putative uncharacterized protein DKFZp686H20196 | K.TTPPVLDSDGSFFLYSK.L            | 2 | 3.42 | 0.37 |  |
| IPI00423466 | Putative uncharacterized protein DKFZp686H20196 | K.TTPPVLDSDGSFFLYSK.L            | 3 | 4.11 | 0.39 |  |
| IPI00423466 | Putative uncharacterized protein DKFZp686H20196 | K.VSNKALPAPIEK.T                 | 2 | 3.33 | 0.18 |  |
| IPI00423466 | Putative uncharacterized protein DKFZp686H20196 | K.WYVDGVEVHNAK.T                 | 1 | 2.91 | 0.35 |  |
| IPI00423466 | Putative uncharacterized protein DKFZp686H20196 | K.WYVDGVEVHNAK.T                 | 2 | 3.90 | 0.46 |  |
| IPI00423466 | Putative uncharacterized protein DKFZp686H20196 | K.WYVDGVEVHNAK.T                 | 3 | 2.99 | 0.21 |  |
| IPI00423466 | Putative uncharacterized protein DKFZp686H20196 | R.CPAPELLGGPSVFLFPPKPK.D         | 2 | 4.00 | 0.37 |  |
| IPI00423466 | Putative uncharacterized protein DKFZp686H20196 | R.CPAPELLGGPSVFLFPPKPK.D         | 3 | 6.31 | 0.49 |  |
| IPI00423466 | Putative uncharacterized protein DKFZp686H20196 | R.CPAPELLGGPSVFLFPPKPKDTLM*ISR.T | 3 | 3.77 | 0.23 |  |
| IPI00423466 | Putative uncharacterized protein DKFZp686H20196 | R.EPQVYTLPPSRDELTK.N             | 2 | 3.97 | 0.21 |  |
| IPI00423466 | Putative uncharacterized protein DKFZp686H20196 | R.EPQVYTLPPSRDELTKNQVSLTCLVK.G   | 3 | 4.03 | 0.23 |  |
| IPI00423466 | Putative uncharacterized protein DKFZp686H20196 | R.STSGGTAALGCLVK.D               | 1 | 2.45 | 0.34 |  |
| IPI00423466 | Putative uncharacterized protein DKFZp686H20196 | R.STSGGTAALGCLVK.D               | 2 | 4.37 | 0.45 |  |
| IPI00423466 | Putative uncharacterized protein DKFZp686H20196 | R.TNDTATYYCAK.E                  | 2 | 3.59 | 0.11 |  |
| IPI00423466 | Putative uncharacterized protein DKFZp686H20196 | R.TPEVTCVVVDVSHED.P              | 2 | 5.50 | 0.52 |  |
| IPI00423466 | Putative uncharacterized protein DKFZp686H20196 | R.VVSVLTVLHQDWLNGK.E             | 1 | 4.22 | 0.41 |  |
| IPI00423466 | Putative uncharacterized protein DKFZp686H20196 | R.VVSVLTVLHQDWLNGK.E             | 2 | 5.39 | 0.46 |  |
| IPI00423466 | Putative uncharacterized protein DKFZp686H20196 | R.VVSVLTVLHQDWLNGK.E             | 3 | 3.42 | 0.38 |  |
| IPI00423466 | Putative uncharacterized protein DKFZp686H20196 | R.VVSVLTVLHQDWLNGKEYK.C          | 2 | 5.56 | 0.40 |  |
| IPI00423466 | Putative uncharacterized protein DKFZp686H20196 | R.VVSVLTVLHQDWLNGKEYK.C          | 3 | 4.97 | 0.40 |  |



|             |                                                        |                                             |   |      |      |       |
|-------------|--------------------------------------------------------|---------------------------------------------|---|------|------|-------|
| IPI00423683 | Isoform 2 of EMI domain-containing protein 1 precursor | K.VSELTERR.L                                | 2 | 2.05 | 0.08 | -4.56 |
| IPI00424119 | Frizzled-3 precursor                                   | R.DFRPFLCALYAPICM*EYGR.V                    | 3 | 2.62 | 0.16 | -0.25 |
| IPI00426051 | Putative uncharacterized protein DKFZp686C15213        | C.PPCPAPPVAGPSVFLFPPKPK.D                   | 3 | 6.61 | 0.48 |       |
| IPI00426051 | Putative uncharacterized protein DKFZp686C15213        | K.CCVECPPCPAPPVAGPSVFLFPPKPK.D              | 2 | 4.27 | 0.44 |       |
| IPI00426051 | Putative uncharacterized protein DKFZp686C15213        | K.CCVECPPCPAPPVAGPSVFLFPPKPK.D              | 3 | 5.21 | 0.49 |       |
| IPI00426051 | Putative uncharacterized protein DKFZp686C15213        | K.CCVECPPCPAPPVAGPSVFLFPPKPKDTLM*ISR.T      | 3 | 4.29 | 0.43 |       |
| IPI00426051 | Putative uncharacterized protein DKFZp686C15213        | K.CKVSNGKLPAPIEK.T                          | 3 | 2.67 | 0.22 |       |
| IPI00426051 | Putative uncharacterized protein DKFZp686C15213        | K.DTLM*ISR.T                                | 2 | 2.48 | 0.09 | -3.74 |
| IPI00426051 | Putative uncharacterized protein DKFZp686C15213        | K.DTLMISR.T                                 | 1 | 2.38 | 0.13 |       |
| IPI00426051 | Putative uncharacterized protein DKFZp686C15213        | K.DTLMISR.T                                 | 2 | 2.45 | 0.16 |       |
| IPI00426051 | Putative uncharacterized protein DKFZp686C15213        | K.GFYPSDIAVEWESNGQPENNYK.T                  | 2 | 4.88 | 0.31 |       |
| IPI00426051 | Putative uncharacterized protein DKFZp686C15213        | K.GFYPSDIAVEWESNGQPENNYK.T                  | 3 | 4.56 | 0.26 |       |
| IPI00426051 | Putative uncharacterized protein DKFZp686C15213        | K.GFYPSDIAVEWESNGQPENNYKTPPM*LDSGDSFFLYSK.L | 3 | 3.16 | 0.16 |       |
| IPI00426051 | Putative uncharacterized protein DKFZp686C15213        | K.GPSVFPLAPCSR.S                            | 1 | 2.54 | 0.34 |       |
| IPI00426051 | Putative uncharacterized protein DKFZp686C15213        | K.GPSVFPLAPCSR.S                            | 2 | 3.53 | 0.37 |       |
| IPI00426051 | Putative uncharacterized protein DKFZp686C15213        | K.GQPREPQVYTLPPSR.E                         | 2 | 2.89 | 0.13 |       |
| IPI00426051 | Putative uncharacterized protein DKFZp686C15213        | K.GQPREPQVYTLPPSR.E                         | 3 | 2.92 | 0.17 |       |
| IPI00426051 | Putative uncharacterized protein DKFZp686C15213        | K.GQPREPQVYTLPPSREEM*TK.N                   | 3 | 3.87 | 0.30 |       |
| IPI00426051 | Putative uncharacterized protein DKFZp686C15213        | K.GQPREPQVYTLPPSREEM*TKNQVSLTCLVK.G         | 3 | 3.18 | 0.26 |       |
| IPI00426051 | Putative uncharacterized protein DKFZp686C15213        | K.GQPREPQVYTLPPSREEMTK.N                    | 3 | 3.97 | 0.17 |       |
| IPI00426051 | Putative uncharacterized protein DKFZp686C15213        | K.NQVSLTCLVK.G                              | 1 | 2.26 | 0.22 |       |
| IPI00426051 | Putative uncharacterized protein DKFZp686C15213        | K.NQVSLTCLVK.G                              | 2 | 2.44 | 0.28 | -2.15 |

|             |                                                 |                                        |   |      |      |  |
|-------------|-------------------------------------------------|----------------------------------------|---|------|------|--|
| IPI00426051 | Putative uncharacterized protein DKFZp686C15213 | K.NSLYLQM*NSLR.A                       | 2 | 3.76 | 0.14 |  |
| IPI00426051 | Putative uncharacterized protein DKFZp686C15213 | K.NSLYLQMNSLR.A                        | 1 | 3.55 | 0.11 |  |
| IPI00426051 | Putative uncharacterized protein DKFZp686C15213 | K.NSLYLQMNSLR.A                        | 2 | 4.01 | 0.17 |  |
| IPI00426051 | Putative uncharacterized protein DKFZp686C15213 | K.TKGQPREPQVYTLPPSREEM*TK.N            | 3 | 3.08 | 0.11 |  |
| IPI00426051 | Putative uncharacterized protein DKFZp686C15213 | K.VSNKGLPAPIEK.T                       | 1 | 2.10 | 0.15 |  |
| IPI00426051 | Putative uncharacterized protein DKFZp686C15213 | K.VSNKGLPAPIEK.T                       | 2 | 3.30 | 0.19 |  |
| IPI00426051 | Putative uncharacterized protein DKFZp686C15213 | R.DNAKNSLYLQM*NSLR.A                   | 2 | 4.82 | 0.44 |  |
| IPI00426051 | Putative uncharacterized protein DKFZp686C15213 | R.DNAKNSLYLQM*NSLR.A                   | 3 | 4.39 | 0.37 |  |
| IPI00426051 | Putative uncharacterized protein DKFZp686C15213 | R.EEM*TKNQVSLTCLVK.G                   | 2 | 3.75 | 0.32 |  |
| IPI00426051 | Putative uncharacterized protein DKFZp686C15213 | R.EPQVYTLPPSREEM*TK.N                  | 1 | 2.26 | 0.37 |  |
| IPI00426051 | Putative uncharacterized protein DKFZp686C15213 | R.EPQVYTLPPSREEM*TK.N                  | 2 | 4.02 | 0.44 |  |
| IPI00426051 | Putative uncharacterized protein DKFZp686C15213 | R.EPQVYTLPPSREEM*TKNQVSLTCLVK.G        | 3 | 2.94 | 0.15 |  |
| IPI00426051 | Putative uncharacterized protein DKFZp686C15213 | R.EPQVYTLPPSREEMTK.N                   | 1 | 2.97 | 0.15 |  |
| IPI00426051 | Putative uncharacterized protein DKFZp686C15213 | R.EPQVYTLPPSREEMTK.N                   | 2 | 3.92 | 0.38 |  |
| IPI00426051 | Putative uncharacterized protein DKFZp686C15213 | R.EPQVYTLPPSREEMTKNQVSLTCLVK.G         | 3 | 3.59 | 0.25 |  |
| IPI00426051 | Putative uncharacterized protein DKFZp686C15213 | R.KCCVECPCPAPPVAGPSVFLFPPKPK.D         | 2 | 3.33 | 0.41 |  |
| IPI00426051 | Putative uncharacterized protein DKFZp686C15213 | R.KCCVECPCPAPPVAGPSVFLFPPKPK.D         | 3 | 5.71 | 0.46 |  |
| IPI00426051 | Putative uncharacterized protein DKFZp686C15213 | R.KCCVECPCPAPPVAGPSVFLFPPKPKDTLM*ISR.T | 3 | 4.57 | 0.37 |  |
| IPI00426051 | Putative uncharacterized protein DKFZp686C15213 | R.LSCAASGFTFSSYSMNWVR.Q                | 2 | 4.03 | 0.30 |  |
| IPI00426051 | Putative uncharacterized protein DKFZp686C15213 | R.STSESTVALGCLVK.D                     | 1 | 2.27 | 0.07 |  |
| IPI00426051 | Putative uncharacterized protein DKFZp686C15213 | R.STSESTVALGCLVK.D                     | 2 | 3.72 | 0.27 |  |

|             |                                                                                    |                                       |   |      |      |       |
|-------------|------------------------------------------------------------------------------------|---------------------------------------|---|------|------|-------|
| IPI00426051 | Putative uncharacterized protein DKFZp686C15213                                    | R.TPEVTCVVVDVSHED.P                   | 2 | 5.50 | 0.52 |       |
| IPI00426051 | Putative uncharacterized protein DKFZp686C15213                                    | R.TPEVTCVVVDVSHEDPEVQFNWYVDGMEVHNAK.T | 3 | 4.56 | 0.38 |       |
| IPI00426051 | Putative uncharacterized protein DKFZp686C15213                                    | R.VVSVLTVVHQDWLNGK.E                  | 1 | 4.17 | 0.39 |       |
| IPI00426051 | Putative uncharacterized protein DKFZp686C15213                                    | R.VVSVLTVVHQDWLNGK.E                  | 2 | 5.13 | 0.46 |       |
| IPI00426051 | Putative uncharacterized protein DKFZp686C15213                                    | R.VVSVLTVVHQDWLNGK.E                  | 3 | 3.17 | 0.25 |       |
| IPI00426051 | Putative uncharacterized protein DKFZp686C15213                                    | R.VVSVLTVVHQDWLNGKEYK.C               | 2 | 5.56 | 0.47 |       |
| IPI00426051 | Putative uncharacterized protein DKFZp686C15213                                    | R.VVSVLTVVHQDWLNGKEYK.C               | 3 | 4.44 | 0.35 |       |
| IPI00426051 | Putative uncharacterized protein DKFZp686C15213                                    | V.SVLTVVHQDWLNGKEYK.C                 | 2 | 5.09 | 0.35 |       |
| IPI00426727 | Isoform 1 of Methyl-CpG-binding domain protein 4                                   | K.SRYKDCSM*AALTSHLQNSNNSNWNLRTRSK.C   | 3 | 3.86 | 0.27 |       |
| IPI00426727 | Isoform 1 of Methyl-CpG-binding domain protein 4                                   | R.KEDVAMELERVGEDEEQMMIK.R             | 2 | 1.26 | 0.16 | -5.52 |
| IPI00428511 | Neurexin-1-beta precursor                                                          | K.EQGQPFQGLSGLYYNGLK.V                | 2 | 4.61 | 0.43 | -4.37 |
| IPI00428511 | Neurexin-1-beta precursor                                                          | R.AGGREPYPGSAEVIR.E                   | 2 | 3.57 | 0.21 | -3.41 |
| IPI00428511 | Neurexin-1-beta precursor                                                          | R.GGHAGTTYIFSK.G                      | 2 | 3.26 | 0.41 | -1.51 |
| IPI00428511 | Neurexin-1-beta precursor                                                          | R.LAIGFSTVQK.E                        | 1 | 2.15 | 0.28 | -3.30 |
| IPI00428511 | Neurexin-1-beta precursor                                                          | R.LAIGFSTVQK.E                        | 2 | 3.55 | 0.39 | -2.11 |
| IPI00428511 | Neurexin-1-beta precursor                                                          | R.NRDEGSYHVDESR.N                     | 2 | 3.40 | 0.26 | -1.27 |
| IPI00428511 | Neurexin-1-beta precursor                                                          | R.NRDEGSYHVDESR.N                     | 3 | 2.64 | 0.21 | -1.75 |
| IPI00428511 | Neurexin-1-beta precursor                                                          | R.NYISNSAQSNQAVVK.E                   | 2 | 4.83 | 0.42 | -1.90 |
| IPI00428511 | Neurexin-1-beta precursor                                                          | R.VDSSSGLGDYLELHIHQGK.I               | 2 | 3.95 | 0.48 | -4.05 |
| IPI00428511 | Neurexin-1-beta precursor                                                          | R.VDSSSGLGDYLELHIHQGK.I               | 3 | 3.41 | 0.38 | -2.88 |
| IPI00428511 | Neurexin-1-beta precursor                                                          | R.VDSSSGLGDYLELHIHQGK.I               | 4 | 4.16 | 0.39 | -2.65 |
| IPI00428741 | LP2477                                                                             | R.GQGJVWATHK.E                        | 2 | 1.85 | 0.18 |       |
| IPI00428967 | Toll-like receptor adapter molecule 2                                              | A.SEITFELPDNAK.Q                      | 2 | 4.34 | 0.33 | -2.92 |
| IPI00428967 | Toll-like receptor adapter molecule 2                                              | K.FCFSNEFSTFTHK.T                     | 3 | 2.71 | 0.31 | -2.12 |
| IPI00428967 | Toll-like receptor adapter molecule 2                                              | K.VLYKEM*K.K                          | 2 | 2.29 | 0.08 | -0.31 |
| IPI00428967 | Toll-like receptor adapter molecule 2                                              | R.LEDPDGKVLVK.E                       | 3 | 2.03 | 0.14 | -1.14 |
| IPI00429191 | Eukaryotic peptide chain release factor subunit 1                                  | R.GGQSALRFAR.L                        | 2 | 1.83 | 0.05 | -4.26 |
| IPI00430291 | Isoform Delta 2 of Calcium/calmodulin-dependent protein kinase type II delta chain | K.ICDPGLTAFEPEALGNLVEGM*DFHR.F        | 3 | 3.57 | 0.31 | -3.93 |
| IPI00430291 | Isoform Delta 2 of Calcium/calmodulin-dependent protein kinase type II delta chain | K.LFEELGK.Q                           | 2 | 2.14 | 0.07 | -3.69 |
| IPI00430291 | Isoform Delta 2 of Calcium/calmodulin-dependent protein kinase type II delta chain | R.FYFENALSK.S                         | 2 | 2.85 | 0.23 | -0.98 |

|             |                                                                                    |                                         |   |      |      |       |
|-------------|------------------------------------------------------------------------------------|-----------------------------------------|---|------|------|-------|
| IPI00430291 | Isoform Delta 2 of Calcium/calmodulin-dependent protein kinase type II delta chain | R.KQEIIKVTQLIEAINNGDFEAYTK.I            | 3 | 3.45 | 0.29 | -3.42 |
| IPI00430291 | Isoform Delta 2 of Calcium/calmodulin-dependent protein kinase type II delta chain | R.LTQYM*DGSGM*PK.T                      | 2 | 3.13 | 0.44 | -3.60 |
| IPI00430808 | Immunoglobulin light chain (Fragment)                                              | K.ADYEKHKVYACEVTHQGLSSPVTK.S            | 3 | 6.20 | 0.45 |       |
| IPI00430808 | Immunoglobulin light chain (Fragment)                                              | K.DSTYLSSTLTLSK.A                       | 1 | 3.19 | 0.31 |       |
| IPI00430808 | Immunoglobulin light chain (Fragment)                                              | K.DSTYLSSTLTLSK.A                       | 2 | 2.59 | 0.17 | -2.80 |
| IPI00430808 | Immunoglobulin light chain (Fragment)                                              | K.DSTYLSSTLTLSK.A                       | 3 | 3.23 | 0.27 |       |
| IPI00430808 | Immunoglobulin light chain (Fragment)                                              | K.HKVYACEVTHQGLSSPVTK.S                 | 3 | 4.56 | 0.36 |       |
| IPI00430808 | Immunoglobulin light chain (Fragment)                                              | K.RTVAAPSVFIFPPSDEQLK.S                 | 2 | 5.74 | 0.42 |       |
| IPI00430808 | Immunoglobulin light chain (Fragment)                                              | K.RTVAAPSVFIFPPSDEQLK.S                 | 3 | 4.14 | 0.22 |       |
| IPI00430808 | Immunoglobulin light chain (Fragment)                                              | K.SGTASVVCLLNNFYPR.E                    | 1 | 4.08 | 0.39 |       |
| IPI00430808 | Immunoglobulin light chain (Fragment)                                              | K.SGTASVVCLLNNFYPR.E                    | 2 | 3.05 | 0.36 | -5.56 |
| IPI00430808 | Immunoglobulin light chain (Fragment)                                              | K.SGTASVVCLLNNFYPR.E                    | 3 | 4.63 | 0.31 |       |
| IPI00430808 | Immunoglobulin light chain (Fragment)                                              | K.VDNALQSGNSQESVTEQDSK.D                | 2 | 5.40 | 0.58 | -3.51 |
| IPI00430808 | Immunoglobulin light chain (Fragment)                                              | K.VDNALQSGNSQESVTEQDSK.D                | 3 | 4.56 | 0.42 | -2.63 |
| IPI00430808 | Immunoglobulin light chain (Fragment)                                              | K.VDNALQSGNSQESVTEQDSKDYLSSTLTLSK.A     | 2 | 3.56 | 0.49 |       |
| IPI00430808 | Immunoglobulin light chain (Fragment)                                              | K.VDNALQSGNSQESVTEQDSKDYLSSTLTLSK.A     | 3 | 6.26 | 0.51 |       |
| IPI00430808 | Immunoglobulin light chain (Fragment)                                              | K.VDNALQSGNSQESVTEQDSKDYLSSTLTLSKADYK.H | 3 | 4.65 | 0.36 |       |
| IPI00430808 | Immunoglobulin light chain (Fragment)                                              | K.VQWKVDNALQSGNSQESVTEQDSK.D            | 2 | 5.17 | 0.41 |       |
| IPI00430808 | Immunoglobulin light chain (Fragment)                                              | K.VQWKVDNALQSGNSQESVTEQDSK.D            | 3 | 6.42 | 0.38 |       |
| IPI00430808 | Immunoglobulin light chain (Fragment)                                              | K.VQWKVDNALQSGNSQESVTEQDSKDYLSSTLTLSK.A | 3 | 5.65 | 0.43 |       |
| IPI00430808 | Immunoglobulin light chain (Fragment)                                              | K.VYACEVTHQGLSSPVTK.S                   | 1 | 4.33 | 0.48 |       |
| IPI00430808 | Immunoglobulin light chain (Fragment)                                              | K.VYACEVTHQGLSSPVTK.S                   | 2 | 5.40 | 0.48 |       |
| IPI00430808 | Immunoglobulin light chain (Fragment)                                              | K.VYACEVTHQGLSSPVTK.S                   | 3 | 4.16 | 0.44 |       |
| IPI00430808 | Immunoglobulin light chain (Fragment)                                              | Q.SGNSQESVTEQDSKDYLSSTLTLSK.A           | 3 | 6.25 | 0.52 |       |
| IPI00430808 | Immunoglobulin light chain (Fragment)                                              | R.DSGVPDRFSGSGSGDFTLK.I                 | 2 | 4.03 | 0.34 |       |
| IPI00430808 | Immunoglobulin light chain (Fragment)                                              | R.DSGVPDRFSGSGSGDFTLK.I                 | 3 | 2.77 | 0.24 |       |
| IPI00430808 | Immunoglobulin light chain (Fragment)                                              | R.FSGSGSGDFTLK.I                        | 1 | 2.83 | 0.22 |       |
| IPI00430808 | Immunoglobulin light chain (Fragment)                                              | R.FSGSGSGDFTLK.I                        | 2 | 3.86 | 0.19 |       |
| IPI00430808 | Immunoglobulin light chain (Fragment)                                              | R.TVAAPSVF.-                            | 1 | 1.75 | 0.12 |       |
| IPI00430808 | Immunoglobulin light chain (Fragment)                                              | R.TVAAPSVFIFPPSDEQLK.S                  | 1 | 3.65 | 0.48 |       |
| IPI00430808 | Immunoglobulin light chain (Fragment)                                              | R.TVAAPSVFIFPPSDEQLK.S                  | 2 | 4.89 | 0.48 |       |
| IPI00430808 | Immunoglobulin light chain (Fragment)                                              | R.TVAAPSVFIFPPSDEQLK.S                  | 3 | 4.07 | 0.25 |       |
| IPI00430808 | Immunoglobulin light chain (Fragment)                                              | R.TVAAPSVFIFPPSDEQLKSGTASVVCLLNNFYPR.E  | 3 | 5.23 | 0.48 |       |
| IPI00430808 | Immunoglobulin light chain (Fragment)                                              | V.YACEVTHQGLSSPVTK.S                    | 2 | 5.14 | 0.43 |       |
| IPI00430842 | IGHA1 protein                                                                      | K.GDTFSCMVGHEALPLAFTQK.T                | 2 | 4.19 | 0.19 |       |
| IPI00430842 | IGHA1 protein                                                                      | K.KGDTFSCM*VGHEALPLAFTQK.T              | 2 | 4.91 | 0.41 |       |
| IPI00430842 | IGHA1 protein                                                                      | K.KGDTFSCM*VGHEALPLAFTQK.T              | 3 | 3.90 | 0.44 | -2.10 |
| IPI00430842 | IGHA1 protein                                                                      | K.NTLYLQMNSLR.A                         | 1 | 3.28 | 0.09 |       |
| IPI00430842 | IGHA1 protein                                                                      | K.NTLYLQMNSLR.A                         | 2 | 4.45 | 0.07 |       |
| IPI00430842 | IGHA1 protein                                                                      | K.SAVQGPPER.D                           | 2 | 2.30 | 0.12 | 0.79  |

|             |                                                                    |                                                     |   |      |      |       |
|-------------|--------------------------------------------------------------------|-----------------------------------------------------|---|------|------|-------|
| IPI00430842 | IGHA1 protein                                                      | K.SAVQGPPELDLCGCYSVSSVLPGCAEPWNHGK.T                | 3 | 5.80 | 0.08 |       |
| IPI00430842 | IGHA1 protein                                                      | K.SGNTFRPEVHLLPPPSEELALNELVLTCLAR.G                 | 2 | 4.32 | 0.41 |       |
| IPI00430842 | IGHA1 protein                                                      | K.SGNTFRPEVHLLPPPSEELALNELVLTCLAR.G                 | 3 | 6.86 | 0.60 |       |
| IPI00430842 | IGHA1 protein                                                      | K.TFTCTAAYPESK.T                                    | 1 | 2.27 | 0.26 |       |
| IPI00430842 | IGHA1 protein                                                      | K.TFTCTAAYPESK.T                                    | 2 | 4.10 | 0.40 |       |
| IPI00430842 | IGHA1 protein                                                      | K.TFTCTAAYPESKPLTATLSK.S                            | 2 | 4.13 | 0.39 |       |
| IPI00430842 | IGHA1 protein                                                      | K.TFTCTAAYPESKPLTATLSK.S                            | 3 | 4.01 | 0.44 |       |
| IPI00430842 | IGHA1 protein                                                      | K.TPLTATLSK.S                                       | 1 | 2.18 | 0.20 |       |
| IPI00430842 | IGHA1 protein                                                      | K.TPLTATLSK.S                                       | 2 | 2.50 | 0.14 |       |
| IPI00430842 | IGHA1 protein                                                      | K.VFPLSLCSTQPDGNVVIACLVLQGGFFPQEPLSVTWSESGQGV.TAR.N | 3 | 3.85 | 0.24 |       |
| IPI00430842 | IGHA1 protein                                                      | K.YLTWASR.Q                                         | 1 | 1.98 | 0.18 |       |
| IPI00430842 | IGHA1 protein                                                      | K.YLTWASR.Q                                         | 2 | 1.93 | 0.24 |       |
| IPI00430842 | IGHA1 protein                                                      | Q.EPSQGTTFFAVTSILR.V                                | 2 | 3.82 | 0.43 | -5.84 |
| IPI00430842 | IGHA1 protein                                                      | R.DASGVFTWTPSSGK.S                                  | 1 | 3.53 | 0.45 |       |
| IPI00430842 | IGHA1 protein                                                      | R.DASGVFTWTPSSGK.S                                  | 2 | 5.30 | 0.49 |       |
| IPI00430842 | IGHA1 protein                                                      | R.DLCGCYSVSSVLPGCAEPWNHGK.T                         | 2 | 4.99 | 0.09 |       |
| IPI00430842 | IGHA1 protein                                                      | R.DLCGCYSVSSVLPGCAEPWNHGK.T                         | 3 | 3.41 | 0.09 |       |
| IPI00430842 | IGHA1 protein                                                      | R.DNAKNTLYLQM*NSLR.G                                | 2 | 4.24 | 0.18 |       |
| IPI00430842 | IGHA1 protein                                                      | R.EKYLTWASR.Q                                       | 1 | 2.49 | 0.27 |       |
| IPI00430842 | IGHA1 protein                                                      | R.GFSPKDVLR.W                                       | 2 | 2.81 | 0.13 |       |
| IPI00430842 | IGHA1 protein                                                      | R.INS DGSSSTYADSVK.G                                | 2 | 2.76 | 0.13 |       |
| IPI00430842 | IGHA1 protein                                                      | R.NFPPSQDASGDLYTTSSQLTLPATQCLAGK.S                  | 2 | 4.34 | 0.48 |       |
| IPI00430842 | IGHA1 protein                                                      | R.NFPPSQDASGDLYTTSSQLTLPATQCLAGK.S                  | 3 | 5.77 | 0.57 |       |
| IPI00430842 | IGHA1 protein                                                      | R.QEPSQGTTFFAVTSILR.V                               | 2 | 4.27 | 0.52 |       |
| IPI00430842 | IGHA1 protein                                                      | R.QEPSQGTTFFAVTSILR.V                               | 3 | 4.05 | 0.27 |       |
| IPI00430842 | IGHA1 protein                                                      | R.VAAEDWK.K                                         | 2 | 2.23 | 0.16 |       |
| IPI00430842 | IGHA1 protein                                                      | R.WLQGSQELPR.E                                      | 1 | 3.00 | 0.19 |       |
| IPI00430842 | IGHA1 protein                                                      | R.WLQGSQELPR.E                                      | 2 | 3.80 | 0.33 |       |
| IPI00430842 | IGHA1 protein                                                      | R.WLQGSQELPREK.Y                                    | 2 | 2.71 | 0.15 |       |
| IPI00431738 | X-linked interleukin-1 receptor accessory protein-like 1 precursor | K.CALFYGYIR.T                                       | 2 | 2.35 | 0.10 | -1.69 |
| IPI00431738 | X-linked interleukin-1 receptor accessory protein-like 1 precursor | K.SSGPGDFEPIAFDGSR.M                                | 2 | 4.27 | 0.51 | -4.10 |
| IPI00431738 | X-linked interleukin-1 receptor accessory protein-like 1 precursor | K.YQVLVGEVPR.I                                      | 2 | 3.32 | 0.38 | -0.65 |
| IPI00431738 | X-linked interleukin-1 receptor accessory protein-like 1 precursor | R.DIEDFLLPTREPEILWYK.E                              | 3 | 3.38 | 0.20 | -3.08 |
| IPI00431738 | X-linked interleukin-1 receptor accessory protein-like 1 precursor | R.ELMYTVELAGGLGAILLLVCLVTIYK.C                      | 2 | 3.01 | 0.10 |       |
| IPI00432226 | AVLL5809                                                           | -.MAVLLKLGVLCSGQGARALLRSR.V                         | 3 | 2.24 | 0.19 |       |
| IPI00432525 | Sialic acid-binding Ig-like lectin 14 precursor                    | K.ALNPSQTSMS*SGTLELPNIGAR.E                         | 3 | 4.60 | 0.29 | -1.60 |
| IPI00432525 | Sialic acid-binding Ig-like lectin 14 precursor                    | K.LNLEVTALIEKPDHIFLEPLESGRPTR.L                     | 4 | 3.12 | 0.08 | -4.38 |

|             |                                                                               |                                           |   |      |      |       |
|-------------|-------------------------------------------------------------------------------|-------------------------------------------|---|------|------|-------|
| IPI00432525 | Sialic acid-binding Ig-like lectin 14 precursor                               | K.YSYQQNK.L                               | 2 | 2.85 | 0.11 | -2.49 |
| IPI00432525 | Sialic acid-binding Ig-like lectin 14 precursor                               | W.TGNALSPLDPETTR.S                        | 2 | 3.37 | 0.35 | -1.94 |
| IPI00432592 | 126 kDa protein                                                               | K.GENFYFK.H                               | 2 | 1.85 | 0.06 | -1.31 |
| IPI00432592 | 126 kDa protein                                                               | R.GAEGDLAPER.L                            | 2 | 2.36 | 0.19 | -2.20 |
| IPI00432592 | 126 kDa protein                                                               | R.GPTSEPLVIELISQEPNPGVHYEYHLPLR.R         | 4 | 4.64 | 0.28 | -4.52 |
| IPI00432592 | 126 kDa protein                                                               | R.GYNQILIVPM*GATSILIDEAAASR.N             | 2 | 3.05 | 0.25 | -3.38 |
| IPI00432592 | 126 kDa protein                                                               | R.GYNQILIVPM*GATSILIDEAAASR.N             | 3 | 4.02 | 0.35 | -5.72 |
| IPI00432592 | 126 kDa protein                                                               | R.ISLAGVEPSLVQAALGQLVR.L                  | 2 | 5.48 | 0.51 | -4.19 |
| IPI00432592 | 126 kDa protein                                                               | R.ISLAGVEPSLVQAALGQLVR.L                  | 3 | 4.19 | 0.30 | -3.62 |
| IPI00432592 | 126 kDa protein                                                               | R.LRLDQNPQR.V                             | 2 | 3.16 | 0.12 | -2.11 |
| IPI00432592 | 126 kDa protein                                                               | R.VHQSPDGTLLIYNLR.A                       | 3 | 3.33 | 0.16 | -3.04 |
| IPI00432592 | 126 kDa protein                                                               | R.VVDASPGQR.I                             | 2 | 2.35 | 0.15 | -2.63 |
| IPI00432707 | Caspase-12                                                                    | K.AGADTHGRLLQGNICNDAVTK.A                 | 3 | 3.75 | 0.08 | -8.04 |
| IPI00432723 | Isoform 1 of Xylosyltransferase 2                                             | R.FLVPLPLTFNR.K                           | 2 | 3.03 | 0.16 | -2.82 |
| IPI00432723 | Isoform 1 of Xylosyltransferase 2                                             | R.LLQFWEPLGETR.F                          | 2 | 2.14 | 0.13 | 0.57  |
| IPI00432723 | Isoform 1 of Xylosyltransferase 2                                             | R.QFYTYTLLPAESFFHTVLENSLACETLVDNLR.V      | 3 | 2.45 | 0.05 | -4.06 |
| IPI00432723 | Isoform 1 of Xylosyltransferase 2                                             | R.TNEELVAFLSK.N                           | 2 | 3.35 | 0.35 | -3.62 |
| IPI00432755 | PPRR6495                                                                      | R.NLPDEPTAPPTLPGLSREASPCFVCPR.E           | 3 | 2.53 | 0.13 | -5.80 |
| IPI00432766 | Isoform 2 of Netrin-G2 precursor                                              | N.LYKYFYAISNIEVIGR.C                      | 3 | 3.87 | 0.22 | -2.88 |
| IPI00432766 | Isoform 2 of Netrin-G2 precursor                                              | R.NM*DNLYTR.L                             | 2 | 2.42 | 0.19 | 0.11  |
| IPI00434711 | Putative uncharacterized protein FP6679                                       | -.M*TNYYM*SEISSLLVNNESCDDKSQIFTLRYPIISK.T | 3 | 2.22 | 0.12 | 2.10  |
| IPI00435925 | PP14214                                                                       | R.ALLENRGVSRHSAYLLAFLYFFNFLGGK.V          | 3 | 3.28 | 0.21 |       |
| IPI00437751 | Isoform Somatic-1 of Angiotensin-converting enzyme, somatic isoform precursor | K.IAFIPFSYLVQDQWR.W                       | 2 | 4.28 | 0.47 | -8.28 |
| IPI00437751 | Isoform Somatic-1 of Angiotensin-converting enzyme, somatic isoform precursor | K.IAFLPFGYLVQDQWR.W                       | 2 | 4.05 | 0.34 | -1.44 |
| IPI00437751 | Isoform Somatic-1 of Angiotensin-converting enzyme, somatic isoform precursor | K.IAFLPFGYLVQDQWR.W                       | 3 | 4.31 | 0.32 | -3.34 |
| IPI00437751 | Isoform Somatic-1 of Angiotensin-converting enzyme, somatic isoform precursor | R.AILQFYPK.Y                              | 2 | 2.57 | 0.12 | -2.69 |
| IPI00437751 | Isoform Somatic-1 of Angiotensin-converting enzyme, somatic isoform precursor | R.TQGDFDPGAK.F                            | 2 | 1.91 | 0.17 | -3.21 |
| IPI00438170 | Isoform 1 of Sorting nexin-12                                                 | K.IAGHPLAQNER.C                           | 3 | 2.68 | 0.27 | -2.57 |
| IPI00438286 | Isoform 1 of Protein LAP2                                                     | K.YLDVSK.N                                | 1 | 2.10 | 0.06 | -3.44 |
| IPI00439446 | MAN1A1 protein                                                                | A.KETLQKLPEEIQR.D                         | 2 | 4.44 | 0.33 | -3.09 |
| IPI00439446 | MAN1A1 protein                                                                | K.ETLQKLPEEIQR.D                          | 2 | 3.14 | 0.26 | -3.04 |
| IPI00439446 | MAN1A1 protein                                                                | K.ETLQKLPEEIQR.D                          | 3 | 2.21 | 0.12 | -1.52 |
| IPI00439446 | MAN1A1 protein                                                                | K.GATIVDALDTLFIM*EM*K.H                   | 2 | 4.32 | 0.38 | -5.97 |
| IPI00439446 | MAN1A1 protein                                                                | K.GATIVDALDTLFIM*EM*K.H                   | 3 | 2.84 | 0.16 | -4.38 |
| IPI00439446 | MAN1A1 protein                                                                | K.GATIVDALDTLFIM*EM*KHEFEEAK.S            | 3 | 2.96 | 0.21 | -4.90 |
| IPI00439446 | MAN1A1 protein                                                                | K.GGHSSSLFGNIK.G                          | 1 | 2.94 | 0.23 | -4.72 |
| IPI00439446 | MAN1A1 protein                                                                | K.GGHSSSLFGNIK.G                          | 2 | 3.26 | 0.42 | -3.61 |

|             |                                                     |                                |   |      |      |       |
|-------------|-----------------------------------------------------|--------------------------------|---|------|------|-------|
| IPI00439446 | MAN1A1 protein                                      | K.GYAWGLNELKPISK.G             | 2 | 3.99 | 0.42 | -4.43 |
| IPI00439446 | MAN1A1 protein                                      | K.KAVELGVK.L                   | 1 | 2.30 | 0.11 | -3.67 |
| IPI00439446 | MAN1A1 protein                                      | K.KM*YFDAVQAIETHLIR.K          | 2 | 3.38 | 0.36 | -3.06 |
| IPI00439446 | MAN1A1 protein                                      | K.KM*YFDAVQAIETHLIR.K          | 3 | 4.24 | 0.46 | -4.17 |
| IPI00439446 | MAN1A1 protein                                      | K.KVAQDQLR.D                   | 1 | 2.07 | 0.09 | -3.87 |
| IPI00439446 | MAN1A1 protein                                      | K.KVAQDQLR.D                   | 2 | 3.02 | 0.19 | -2.25 |
| IPI00439446 | MAN1A1 protein                                      | K.LLSGVLFHSSPALQPAADHKPGPGAR.A | 3 | 5.42 | 0.56 | -3.31 |
| IPI00439446 | MAN1A1 protein                                      | K.LLSGVLFHSSPALQPAADHKPGPGAR.A | 4 | 2.87 | 0.21 | -2.74 |
| IPI00439446 | MAN1A1 protein                                      | K.LPEEIQR.D                    | 2 | 2.54 | 0.11 | -3.16 |
| IPI00439446 | MAN1A1 protein                                      | K.M*YFDAVQAIETHLIR.K           | 2 | 3.72 | 0.47 | -0.80 |
| IPI00439446 | MAN1A1 protein                                      | K.M*YFDAVQAIETHLIR.K           | 3 | 3.29 | 0.44 | -2.18 |
| IPI00439446 | MAN1A1 protein                                      | K.SSSGLTYIAEWK.G               | 2 | 3.44 | 0.29 | -2.69 |
| IPI00439446 | MAN1A1 protein                                      | K.VAQDQLR.D                    | 1 | 1.60 | 0.07 | -3.49 |
| IPI00439446 | MAN1A1 protein                                      | K.VAQDQLR.D                    | 2 | 1.78 | 0.05 | -2.17 |
| IPI00439446 | MAN1A1 protein                                      | R.DVYLLHESYDDVQQSFFLAETLK.Y    | 3 | 4.17 | 0.37 | -4.62 |
| IPI00439446 | MAN1A1 protein                                      | R.EAKETLQKLPEEIQR.D            | 2 | 4.68 | 0.38 | -3.63 |
| IPI00439446 | MAN1A1 protein                                      | R.EEGAPGDPEAALEDNLAR.I         | 2 | 4.39 | 0.58 | -3.68 |
| IPI00439446 | MAN1A1 protein                                      | R.EPADAAIR.E                   | 1 | 1.68 | 0.16 | -2.48 |
| IPI00439446 | MAN1A1 protein                                      | R.EPADAAIR.E                   | 2 | 2.06 | 0.07 | -2.48 |
| IPI00439446 | MAN1A1 protein                                      | R.FDGGVEAIATR.Q                | 2 | 4.07 | 0.31 | -2.34 |
| IPI00439446 | MAN1A1 protein                                      | R.FVGGLLSAYYLSGEEIFR.K         | 2 | 5.77 | 0.57 | -5.48 |
| IPI00439446 | MAN1A1 protein                                      | R.FVGGLLSAYYLSGEEIFR.K         | 3 | 5.70 | 0.45 | -2.86 |
| IPI00439446 | MAN1A1 protein                                      | R.GLPPVDFVPPIGVESREPADAAIR.E   | 3 | 1.60 | 0.17 | -2.59 |
| IPI00439446 | MAN1A1 protein                                      | R.REEGAPGDPEAALEDNLAR.I        | 3 | 5.47 | 0.43 | -1.59 |
| IPI00439446 | MAN1A1 protein                                      | R.RREGAPGDPEAALEDNLAR.I        | 2 | 4.00 | 0.38 | -4.93 |
| IPI00439446 | MAN1A1 protein                                      | R.RREGAPGDPEAALEDNLAR.I        | 4 | 3.48 | 0.22 | -3.43 |
| IPI00439446 | MAN1A1 protein                                      | W.LM*SDKTDLEAK.K               | 2 | 2.95 | 0.17 | -1.47 |
| IPI00440153 | 68 kDa protein                                      | -.M*AFSGIYKLDGKPYLNCFPAR.N     | 2 | 2.67 | 0.11 |       |
| IPI00440221 | Putative uncharacterized protein (Fragment)         | -.M*PSSSDTALGGGGGLSWAEKRR.V    | 4 | 2.59 | 0.17 | -0.21 |
| IPI00440493 | ATP synthase subunit alpha, mitochondrial precursor | R.EVAFAQFGSDLAATQQLLSR.G       | 3 | 3.00 | 0.15 | -1.98 |
| IPI00440493 | ATP synthase subunit alpha, mitochondrial precursor | R.ILGADTSVDLEETGR.V            | 2 | 3.90 | 0.46 | -1.37 |
| IPI00440577 | IGKV2-24 protein                                    | G.DIVM*TQTPLSSPVTLGQPASISCR.S  | 3 | 6.23 | 0.40 |       |
| IPI00440577 | IGKV2-24 protein                                    | K.ADYEKHKVYACEVTHQGLSSPVTK.S   | 3 | 6.20 | 0.45 |       |
| IPI00440577 | IGKV2-24 protein                                    | K.DSTYLSSTLTLSK.A              | 1 | 3.19 | 0.31 |       |
| IPI00440577 | IGKV2-24 protein                                    | K.DSTYLSSTLTLSK.A              | 2 | 2.59 | 0.17 | -2.80 |
| IPI00440577 | IGKV2-24 protein                                    | K.DSTYLSSTLTLSK.A              | 3 | 3.23 | 0.27 |       |
| IPI00440577 | IGKV2-24 protein                                    | K.HKVYACEVTHQGLSSPVTK.S        | 3 | 4.56 | 0.36 |       |
| IPI00440577 | IGKV2-24 protein                                    | K.RTVAAPSVFIFPPSDEQLK.S        | 2 | 5.74 | 0.42 |       |
| IPI00440577 | IGKV2-24 protein                                    | K.RTVAAPSVFIFPPSDEQLK.S        | 3 | 4.14 | 0.22 |       |
| IPI00440577 | IGKV2-24 protein                                    | K.SGTASVVCLLNFFYPR.E           | 1 | 4.08 | 0.39 |       |

|             |                                                                   |                                           |   |      |      |       |
|-------------|-------------------------------------------------------------------|-------------------------------------------|---|------|------|-------|
| IPI00440577 | IGKV2-24 protein                                                  | K.SGTASVVCLLNNFYPR.E                      | 2 | 3.05 | 0.36 | -5.56 |
| IPI00440577 | IGKV2-24 protein                                                  | K.SGTASVVCLLNNFYPR.E                      | 3 | 4.63 | 0.31 |       |
| IPI00440577 | IGKV2-24 protein                                                  | K.VDNALQSGNSQESVTEQDSK.D                  | 2 | 5.40 | 0.58 | -3.51 |
| IPI00440577 | IGKV2-24 protein                                                  | K.VDNALQSGNSQESVTEQDSK.D                  | 3 | 4.56 | 0.42 | -2.63 |
| IPI00440577 | IGKV2-24 protein                                                  | K.VDNALQSGNSQESVTEQDSKDYSLSSSTLTLSK.A     | 2 | 3.56 | 0.49 |       |
| IPI00440577 | IGKV2-24 protein                                                  | K.VDNALQSGNSQESVTEQDSKDYSLSSSTLTLSK.A     | 3 | 6.26 | 0.51 |       |
| IPI00440577 | IGKV2-24 protein                                                  | K.VDNALQSGNSQESVTEQDSKDYSLSSSTLTLSKADYK.H | 3 | 4.65 | 0.36 |       |
| IPI00440577 | IGKV2-24 protein                                                  | K.VQWKVDNALQSGNSQESVTEQDSK.D              | 2 | 5.17 | 0.41 |       |
| IPI00440577 | IGKV2-24 protein                                                  | K.VQWKVDNALQSGNSQESVTEQDSK.D              | 3 | 6.42 | 0.38 |       |
| IPI00440577 | IGKV2-24 protein                                                  | K.VQWKVDNALQSGNSQESVTEQDSKDYSLSSSTLTLSK.A | 3 | 5.65 | 0.43 |       |
| IPI00440577 | IGKV2-24 protein                                                  | K.VYACEVTHQGLSSPVTK.S                     | 1 | 4.33 | 0.48 |       |
| IPI00440577 | IGKV2-24 protein                                                  | K.VYACEVTHQGLSSPVTK.S                     | 2 | 5.40 | 0.48 |       |
| IPI00440577 | IGKV2-24 protein                                                  | K.VYACEVTHQGLSSPVTK.S                     | 3 | 4.16 | 0.44 |       |
| IPI00440577 | IGKV2-24 protein                                                  | Q.SGNSQESVTEQDSKDYSLSSSTLTLSK.A           | 3 | 6.25 | 0.52 |       |
| IPI00440577 | IGKV2-24 protein                                                  | R.FSGSGAGTDFTLK.I                         | 2 | 3.15 | 0.28 |       |
| IPI00440577 | IGKV2-24 protein                                                  | R.FSGVPDRFSGSGAGTDFTLK.I                  | 2 | 3.86 | 0.30 |       |
| IPI00440577 | IGKV2-24 protein                                                  | R.FSGVPDRFSGSGAGTDFTLK.I                  | 3 | 3.87 | 0.32 |       |
| IPI00440577 | IGKV2-24 protein                                                  | R.LLIYKISNR.F                             | 2 | 3.18 | 0.11 |       |
| IPI00440577 | IGKV2-24 protein                                                  | R.TVAAPSVF.-                              | 1 | 1.75 | 0.12 |       |
| IPI00440577 | IGKV2-24 protein                                                  | R.TVAAPSVFIFPPSDEQLK.S                    | 1 | 3.65 | 0.48 |       |
| IPI00440577 | IGKV2-24 protein                                                  | R.TVAAPSVFIFPPSDEQLK.S                    | 2 | 4.89 | 0.48 |       |
| IPI00440577 | IGKV2-24 protein                                                  | R.TVAAPSVFIFPPSDEQLK.S                    | 3 | 4.07 | 0.25 |       |
| IPI00440577 | IGKV2-24 protein                                                  | R.TVAAPSVFIFPPSDEQLKSGTASVVCLLNNFYPR.E    | 3 | 5.23 | 0.48 |       |
| IPI00440577 | IGKV2-24 protein                                                  | V.YACEVTHQGLSSPVTK.S                      | 2 | 5.14 | 0.43 |       |
| IPI00440580 | Isoform 1 of Glycoprotein endo-alpha-1,2-mannosidase-like protein | K.APDGLPALGPGLELAPFER.R                   | 2 | 4.38 | 0.46 | -2.79 |
| IPI00440580 | Isoform 1 of Glycoprotein endo-alpha-1,2-mannosidase-like protein | K.GRDDITVHDNIK.Y                          | 3 | 2.74 | 0.10 | -2.50 |
| IPI00440580 | Isoform 1 of Glycoprotein endo-alpha-1,2-mannosidase-like protein | K.YIIDTYGSHGAFYR.Y                        | 2 | 3.76 | 0.47 | -3.38 |
| IPI00440580 | Isoform 1 of Glycoprotein endo-alpha-1,2-mannosidase-like protein | R.LYLDYLPHQPSLYLELTR.R                    | 3 | 4.28 | 0.45 | -2.09 |
| IPI00440580 | Isoform 1 of Glycoprotein endo-alpha-1,2-mannosidase-like protein | R.RPEGAPAPAAR.A                           | 2 | 3.39 | 0.33 | -2.56 |
| IPI00440580 | Isoform 1 of Glycoprotein endo-alpha-1,2-mannosidase-like protein | R.TLKAPDGLPALGPGLELAPFER.R                | 2 | 2.89 | 0.44 | -2.76 |
| IPI00440580 | Isoform 1 of Glycoprotein endo-alpha-1,2-mannosidase-like protein | R.TLKAPDGLPALGPGLELAPFER.R                | 3 | 5.03 | 0.48 | -3.18 |
| IPI00440580 | Isoform 1 of Glycoprotein endo-alpha-1,2-mannosidase-like protein | R.VYSDLHAFYYSWYGSPR.R                     | 3 | 3.25 | 0.26 | -3.12 |
| IPI00440580 | Isoform 1 of Glycoprotein endo-alpha-1,2-mannosidase-like protein | T.LKAPDGLPALGPGLELAPFER.R                 | 3 | 4.60 | 0.34 | -1.31 |



|             |                                                 |                                |   |      |      |       |
|-------------|-------------------------------------------------|--------------------------------|---|------|------|-------|
| IPI00440932 | Isoform 1 of ADAM 9 precursor                   | K.QVSYVIQAEQK.E                | 2 | 2.90 | 0.32 | -3.57 |
| IPI00440932 | Isoform 1 of ADAM 9 precursor                   | R.M*DDVYKEPLK.C                | 2 | 3.42 | 0.36 | -1.53 |
| IPI00440932 | Isoform 1 of ADAM 9 precursor                   | R.NKDLLPEDFVVYTYNK.E           | 2 | 4.18 | 0.43 | -0.80 |
| IPI00440932 | Isoform 1 of ADAM 9 precursor                   | R.NKDLLPEDFVVYTYNK.E           | 3 | 3.88 | 0.37 | -0.40 |
| IPI00441344 | Beta-galactosidase precursor                    | K.SLYPLTFIQVK.Q                | 2 | 2.65 | 0.25 | -2.42 |
| IPI00441344 | Beta-galactosidase precursor                    | R.DSFLKDGQPFR.Y                | 3 | 3.40 | 0.33 | -2.37 |
| IPI00441344 | Beta-galactosidase precursor                    | R.VNYGAYINDFK.G                | 2 | 3.13 | 0.36 | -2.63 |
| IPI00441498 | Folate receptor alpha precursor                 | R.TELLNVCM*NAK.H               | 2 | 3.09 | 0.32 | -0.34 |
| IPI00441498 | Folate receptor alpha precursor                 | W.FDPAQGNPNEEVAR.F             | 2 | 3.38 | 0.37 | -4.46 |
| IPI00442121 | delta-aminolevulinic acid dehydratase isoform a | R.GSAADSEESPAIEAIHLLR.K        | 3 | 3.85 | 0.49 | -1.37 |
| IPI00442294 | Neurotrimin variant 3                           | K.AM*DNVTVR.Q                  | 2 | 3.03 | 0.16 | -2.98 |
| IPI00442294 | Neurotrimin variant 3                           | K.AVGFVSEDEYLEIQGITR.E         | 2 | 6.47 | 0.49 | -7.20 |
| IPI00442294 | Neurotrimin variant 3                           | K.AVGFVSEDEYLEIQGITR.E         | 3 | 4.38 | 0.36 | -4.44 |
| IPI00442294 | Neurotrimin variant 3                           | K.GTGVVPGQK.G                  | 1 | 1.96 | 0.22 | -1.30 |
| IPI00442294 | Neurotrimin variant 3                           | K.GTGVVPGQK.G                  | 2 | 2.15 | 0.19 | -3.55 |
| IPI00442294 | Neurotrimin variant 3                           | K.GTLQCEASAVPSAEFQWYK.D        | 2 | 4.43 | 0.50 | -2.75 |
| IPI00442294 | Neurotrimin variant 3                           | K.GTLQCEASAVPSAEFQWYK.D        | 3 | 2.75 | 0.29 | -0.82 |
| IPI00442294 | Neurotrimin variant 3                           | K.GTLQCEASAVPSAEFQWYKDDK.R     | 3 | 3.56 | 0.39 | -3.24 |
| IPI00442294 | Neurotrimin variant 3                           | K.GVKVENRPFLSK.L               | 2 | 3.24 | 0.24 | -3.74 |
| IPI00442294 | Neurotrimin variant 3                           | K.KGVKVENRPFLSK.L              | 3 | 2.41 | 0.21 | -2.67 |
| IPI00442294 | Neurotrimin variant 3                           | K.LGHTNASIM*LFEVK.T            | 2 | 4.07 | 0.09 | -4.78 |
| IPI00442294 | Neurotrimin variant 3                           | K.TTALTPWKGPGA.V               | 2 | 3.32 | 0.35 | 1.64  |
| IPI00442294 | Neurotrimin variant 3                           | K.VENRPFLSK.L                  | 2 | 2.52 | 0.07 | -3.55 |
| IPI00442294 | Neurotrimin variant 3                           | K.VTVNYPPISEAK.G               | 2 | 3.31 | 0.37 | -3.12 |
| IPI00442294 | Neurotrimin variant 3                           | P.VRSGDATFPK.A                 | 1 | 2.19 | 0.22 | -1.28 |
| IPI00442294 | Neurotrimin variant 3                           | R.EQSGDYECASNDVAAPVVR.R        | 2 | 6.13 | 0.62 | -2.84 |
| IPI00442294 | Neurotrimin variant 3                           | R.EQSGDYECASNDVAAPVVR.R        | 3 | 5.22 | 0.55 | -2.74 |
| IPI00442294 | Neurotrimin variant 3                           | R.EQSGDYECASNDVAAPVVR.V        | 2 | 1.89 | 0.33 | -2.14 |
| IPI00442294 | Neurotrimin variant 3                           | R.EQSGDYECASNDVAAPVVR.V        | 3 | 2.85 | 0.42 | -1.69 |
| IPI00442294 | Neurotrimin variant 3                           | R.QGESATLR.C                   | 2 | 1.66 | 0.15 | -3.34 |
| IPI00442294 | Neurotrimin variant 3                           | R.SGDATFPK.A                   | 1 | 2.05 | 0.16 | -3.53 |
| IPI00442294 | Neurotrimin variant 3                           | R.SGDATFPK.A                   | 2 | 2.92 | 0.23 | -4.46 |
| IPI00442294 | Neurotrimin variant 3                           | R.STILYAGNDK.W                 | 1 | 2.48 | 0.29 | -2.46 |
| IPI00442294 | Neurotrimin variant 3                           | R.STILYAGNDK.W                 | 2 | 2.95 | 0.20 | -3.32 |
| IPI00442294 | Neurotrimin variant 3                           | R.STILYAGNDKWCLDPR.V           | 2 | 3.46 | 0.37 | -2.99 |
| IPI00442294 | Neurotrimin variant 3                           | R.STILYAGNDKWCLDPR.V           | 3 | 3.88 | 0.39 | -2.72 |
| IPI00442294 | Neurotrimin variant 3                           | R.VHLIVQVSPK.I                 | 1 | 3.18 | 0.28 | -2.63 |
| IPI00442294 | Neurotrimin variant 3                           | R.VHLIVQVSPK.I                 | 2 | 2.82 | 0.29 | -2.87 |
| IPI00442294 | Neurotrimin variant 3                           | R.VKVTVNYPPISEAK.G             | 2 | 4.86 | 0.54 | -3.84 |
| IPI00442294 | Neurotrimin variant 3                           | R.VKVTVNYPPISEAK.G             | 3 | 4.66 | 0.47 | -3.64 |
| IPI00442294 | Neurotrimin variant 3                           | R.VVLLSNTQTQY.S                | 2 | 3.55 | 0.46 | -3.19 |
| IPI00442294 | Neurotrimin variant 3                           | Y.SIEIQNVVDVYDEGPYTCVQTDNHPK.T | 3 | 5.32 | 0.45 | -2.09 |

|             |                                                                                                                        |                                       |   |      |      |       |
|-------------|------------------------------------------------------------------------------------------------------------------------|---------------------------------------|---|------|------|-------|
| IPI00442297 | Isoform 2 of Neurotrimin precursor                                                                                     | K.AM*DNVTVR.Q                         | 2 | 3.03 | 0.16 | -2.98 |
| IPI00442297 | Isoform 2 of Neurotrimin precursor                                                                                     | K.AVGFVSEDEYLEIQGTR.E                 | 2 | 6.47 | 0.49 | -7.20 |
| IPI00442297 | Isoform 2 of Neurotrimin precursor                                                                                     | K.AVGFVSEDEYLEIQGTR.E                 | 3 | 4.38 | 0.36 | -4.44 |
| IPI00442297 | Isoform 2 of Neurotrimin precursor                                                                                     | K.GTGVVPGQK.G                         | 1 | 1.96 | 0.22 | -1.30 |
| IPI00442297 | Isoform 2 of Neurotrimin precursor                                                                                     | K.GTGVVPGQK.G                         | 2 | 2.15 | 0.19 | -3.55 |
| IPI00442297 | Isoform 2 of Neurotrimin precursor                                                                                     | K.GTLQCEASAVPSAEFQWYK.D               | 2 | 4.43 | 0.50 | -2.75 |
| IPI00442297 | Isoform 2 of Neurotrimin precursor                                                                                     | K.GTLQCEASAVPSAEFQWYK.D               | 3 | 2.75 | 0.29 | -0.82 |
| IPI00442297 | Isoform 2 of Neurotrimin precursor                                                                                     | K.GTLQCEASAVPSAEFQWYKDDK.R            | 3 | 3.56 | 0.39 | -3.24 |
| IPI00442297 | Isoform 2 of Neurotrimin precursor                                                                                     | K.GVKVENRPFLSK.L                      | 2 | 3.24 | 0.24 | -3.74 |
| IPI00442297 | Isoform 2 of Neurotrimin precursor                                                                                     | K.KGVKVENRPFLSK.L                     | 3 | 2.41 | 0.21 | -2.67 |
| IPI00442297 | Isoform 2 of Neurotrimin precursor                                                                                     | K.LGHTNASIM*LFGPGAVSE.V               | 2 | 3.73 | 0.48 | -0.37 |
| IPI00442297 | Isoform 2 of Neurotrimin precursor                                                                                     | K.VENRPFLSK.L                         | 2 | 2.52 | 0.07 | -3.55 |
| IPI00442297 | Isoform 2 of Neurotrimin precursor                                                                                     | K.VTVNYPPYISEAK.G                     | 2 | 3.31 | 0.37 | -3.12 |
| IPI00442297 | Isoform 2 of Neurotrimin precursor                                                                                     | P.VRSGDATFPK.A                        | 1 | 2.19 | 0.22 | -1.28 |
| IPI00442297 | Isoform 2 of Neurotrimin precursor                                                                                     | R.EQSGDYECASNDVAAPVVR.R               | 2 | 6.13 | 0.62 | -2.84 |
| IPI00442297 | Isoform 2 of Neurotrimin precursor                                                                                     | R.EQSGDYECASNDVAAPVVR.R               | 3 | 5.22 | 0.55 | -2.74 |
| IPI00442297 | Isoform 2 of Neurotrimin precursor                                                                                     | R.EQSGDYECASNDVAAPVVR.V               | 2 | 1.89 | 0.33 | -2.14 |
| IPI00442297 | Isoform 2 of Neurotrimin precursor                                                                                     | R.EQSGDYECASNDVAAPVVR.V               | 3 | 2.85 | 0.42 | -1.69 |
| IPI00442297 | Isoform 2 of Neurotrimin precursor                                                                                     | R.QGESATLR.C                          | 2 | 1.66 | 0.15 | -3.34 |
| IPI00442297 | Isoform 2 of Neurotrimin precursor                                                                                     | R.SGDATFPK.A                          | 1 | 2.05 | 0.16 | -3.53 |
| IPI00442297 | Isoform 2 of Neurotrimin precursor                                                                                     | R.SGDATFPK.A                          | 2 | 2.92 | 0.23 | -4.46 |
| IPI00442297 | Isoform 2 of Neurotrimin precursor                                                                                     | R.STILYAGNDK.W                        | 1 | 2.48 | 0.29 | -2.46 |
| IPI00442297 | Isoform 2 of Neurotrimin precursor                                                                                     | R.STILYAGNDK.W                        | 2 | 2.95 | 0.20 | -3.32 |
| IPI00442297 | Isoform 2 of Neurotrimin precursor                                                                                     | R.STILYAGNDKWCLDPR.V                  | 2 | 3.46 | 0.37 | -2.99 |
| IPI00442297 | Isoform 2 of Neurotrimin precursor                                                                                     | R.STILYAGNDKWCLDPR.V                  | 3 | 3.88 | 0.39 | -2.72 |
| IPI00442297 | Isoform 2 of Neurotrimin precursor                                                                                     | R.VHLIVQVSPK.I                        | 1 | 3.18 | 0.28 | -2.63 |
| IPI00442297 | Isoform 2 of Neurotrimin precursor                                                                                     | R.VHLIVQVSPK.I                        | 2 | 2.82 | 0.29 | -2.87 |
| IPI00442297 | Isoform 2 of Neurotrimin precursor                                                                                     | R.VKVTVNYPPYISEAK.G                   | 2 | 4.86 | 0.54 | -3.84 |
| IPI00442297 | Isoform 2 of Neurotrimin precursor                                                                                     | R.VKVTVNYPPYISEAK.G                   | 3 | 4.66 | 0.47 | -3.64 |
| IPI00442297 | Isoform 2 of Neurotrimin precursor                                                                                     | R.VVLLSNTQTQY.S                       | 2 | 3.55 | 0.46 | -3.19 |
| IPI00442297 | Isoform 2 of Neurotrimin precursor                                                                                     | Y.SIEIQNVVDVYDEGPYTCSVQTDNHPK.T       | 3 | 5.32 | 0.45 | -2.09 |
| IPI00442544 | CDNA FLJ27034 fis, clone SLV07984                                                                                      | K.IM*FLFSFNLCIFLMSNVCFFLFM*NHLYYVYR.E | 5 | 2.84 | 0.23 | 2.14  |
| IPI00442564 | CDNA FLJ26948 fis, clone RCT08241                                                                                      | K.GKSVNIYTDSRYAFATLHAHGAIYK.E         | 3 | 2.81 | 0.17 |       |
| IPI00442745 | CDNA FLJ26780 fis, clone PRS03837                                                                                      | K.LM*FIISLACFYSYYREYR.E               | 3 | 2.22 | 0.22 |       |
| IPI00442865 | CDNA FLJ26488 fis, clone KDN05770, highly similar to Bumetanide- sensitive sodium-(potassium)-chloride cotransporter 2 | R.SLLQASGLGR.M                        | 2 | 1.86 | 0.09 | -4.97 |
| IPI00442911 | CDNA FLJ26266 fis, clone DMC05613                                                                                      | K.GPSVFPLAPSSK.S                      | 1 | 3.15 | 0.35 |       |
| IPI00442911 | CDNA FLJ26266 fis, clone DMC05613                                                                                      | K.GPSVFPLAPSSK.S                      | 2 | 3.30 | 0.36 |       |
| IPI00442911 | CDNA FLJ26266 fis, clone DMC05613                                                                                      | K.GPSVFPLAPSSKSTSGGTAALGCLVK.D        | 2 | 4.62 | 0.48 |       |
| IPI00442911 | CDNA FLJ26266 fis, clone DMC05613                                                                                      | K.GPSVFPLAPSSKSTSGGTAALGCLVK.D        | 3 | 4.18 | 0.48 |       |
| IPI00442911 | CDNA FLJ26266 fis, clone DMC05613                                                                                      | N.WFDPWQGGLTVTVSSASTK.G               | 2 | 5.17 | 0.20 |       |

|             |                                                                                             |                                        |   |      |      |       |
|-------------|---------------------------------------------------------------------------------------------|----------------------------------------|---|------|------|-------|
| IPI00442911 | CDNA FLJ26266 fis, clone DMC05613                                                           | R.STSGGTAALGCLVK.D                     | 1 | 2.45 | 0.34 |       |
| IPI00442911 | CDNA FLJ26266 fis, clone DMC05613                                                           | R.STSGGTAALGCLVK.D                     | 2 | 4.37 | 0.45 |       |
| IPI00443799 | hypothetical protein LOC124565 isoform a                                                    | K.ARETVENLPLPLDPVLR.A                  | 3 | 2.73 | 0.21 | -2.91 |
| IPI00443799 | hypothetical protein LOC124565 isoform a                                                    | K.ELPKGPEQVPVDPAR.E                    | 3 | 2.46 | 0.13 | -0.75 |
| IPI00443799 | hypothetical protein LOC124565 isoform a                                                    | K.LLAVIEEQHK.E                         | 2 | 2.63 | 0.23 | -2.46 |
| IPI00443799 | hypothetical protein LOC124565 isoform a                                                    | R.APGGRPAPSQDLNQR.S                    | 2 | 3.01 | 0.28 | -3.92 |
| IPI00443799 | hypothetical protein LOC124565 isoform a                                                    | R.APGGRPAPSQDLNQR.S                    | 3 | 3.17 | 0.45 | -3.19 |
| IPI00443799 | hypothetical protein LOC124565 isoform a                                                    | R.DGVIIIGLNPLPDVQVNDLR.G               | 2 | 5.56 | 0.50 | -3.12 |
| IPI00443799 | hypothetical protein LOC124565 isoform a                                                    | R.DGVIIIGLNPLPDVQVNDLR.G               | 3 | 5.16 | 0.48 | -2.18 |
| IPI00443799 | hypothetical protein LOC124565 isoform a                                                    | R.DLGLAADLPGGAEGAAAQPQAVLR.Q           | 2 | 7.15 | 0.59 | -2.73 |
| IPI00443799 | hypothetical protein LOC124565 isoform a                                                    | R.DLGLAADLPGGAEGAAAQPQAVLR.Q           | 3 | 6.50 | 0.45 | -1.97 |
| IPI00443799 | hypothetical protein LOC124565 isoform a                                                    | R.DLGLAADLPGGAEGAAAQPQAVLRQPELR.V      | 3 | 3.87 | 0.41 | -1.36 |
| IPI00443799 | hypothetical protein LOC124565 isoform a                                                    | R.DPAGPPDGGPDTEPR.A                    | 2 | 3.40 | 0.54 | -2.70 |
| IPI00443799 | hypothetical protein LOC124565 isoform a                                                    | R.GGDHVPVSHEQPR.G                      | 2 | 2.88 | 0.37 | -3.50 |
| IPI00443799 | hypothetical protein LOC124565 isoform a                                                    | R.GGDHVPVSHEQPR.G                      | 3 | 2.46 | 0.11 | -2.60 |
| IPI00443799 | hypothetical protein LOC124565 isoform a                                                    | R.LAEFFPGQSQDVTGGSQDR.K                | 3 | 3.94 | 0.38 | -4.00 |
| IPI00443799 | hypothetical protein LOC124565 isoform a                                                    | R.QAAGGALQVVHSR.Q                      | 2 | 2.70 | 0.28 | 0.06  |
| IPI00443799 | hypothetical protein LOC124565 isoform a                                                    | R.VISDGEQGGQGHR.L                      | 2 | 3.24 | 0.36 | -3.73 |
| IPI00443909 | Isoform 1 of Protein canopy homolog 2 precursor                                             | R.INPDGSQSVEVPYAR.S                    | 2 | 3.39 | 0.13 | -2.08 |
| IPI0044272  | Leukemia inhibitory factor receptor precursor                                               | R.VTALVGPR.A                           | 2 | 2.35 | 0.07 | -4.67 |
| IPI00444331 | Isoform 4 of Histone-lysine N-methyltransferase NSD3                                        | K.GGRLLCCESCPASFHPECLSIEMPEGCWNCNDCK.A | 3 | 1.56 | 0.17 | -2.34 |
| IPI00444605 | CDNA FLJ45296 fis, clone BRHIP3003340, moderately similar to Actin, alpha skeletal muscle 2 | K.EITALAPSTM*K.I                       | 1 | 2.16 | 0.28 | -3.20 |
| IPI00444605 | CDNA FLJ45296 fis, clone BRHIP3003340, moderately similar to Actin, alpha skeletal muscle 2 | K.EITALAPSTM*K.I                       | 2 | 3.01 | 0.23 | -2.30 |
| IPI00444605 | CDNA FLJ45296 fis, clone BRHIP3003340, moderately similar to Actin, alpha skeletal muscle 2 | K.EITALAPSTMK.I                        | 2 | 2.64 | 0.15 | -3.46 |
| IPI00444605 | CDNA FLJ45296 fis, clone BRHIP3003340, moderately similar to Actin, alpha skeletal muscle 2 | R.M*QKEITALAPSTM*K.I                   | 2 | 3.78 | 0.31 | -4.87 |
| IPI00444842 | CDNA FLJ45125 fis, clone BRAWH3036561                                                       | R.M*GAARKACVCLVMFGASPGRLR.S            | 3 | 3.96 | 0.06 |       |
| IPI00445278 | CDNA FLJ44033 fis, clone TEST14028062                                                       | R.ASTSLASPSHPGLRSTGLEAG.P              | 2 | 2.95 | 0.21 | -4.63 |
| IPI00445315 | Protein FAM47C                                                                              | R.GWTYDSVKTIQIRAM*QVYK.Y               | 2 | 2.35 | 0.11 | 0.34  |
| IPI00445364 | CDNA FLJ44171 fis, clone THYMU2036058                                                       | R.SSLAVQVPISGEGMWEGDR.E                | 2 | 2.85 | 0.06 |       |
| IPI00445716 | Isoform 1 of GDNF family receptor alpha-3 precursor                                         | R.QLLTFFEK.A                           | 2 | 1.74 | 0.15 | -2.54 |
| IPI00446588 | Isoform 2 of Plexin-A4 precursor                                                            | K.VLVTHETGPDEDNPK.C                    | 3 | 2.78 | 0.23 | 2.71  |

|             |                                                          |                                            |   |      |      |       |
|-------------|----------------------------------------------------------|--------------------------------------------|---|------|------|-------|
| IPI00448465 | Isoform 1 of Ankyrin repeat domain-containing protein 12 | K.ENQELKQEKEGKENTR.I                       | 2 | 2.62 | 0.07 |       |
| IPI00448925 | IGHG1 protein                                            | C.DKTHTCPAPPELLGGPSVFLFPPKPK.D             | 3 | 6.55 | 0.38 |       |
| IPI00448925 | IGHG1 protein                                            | K.ALPAPIEK.T                               | 1 | 1.81 | 0.11 |       |
| IPI00448925 | IGHG1 protein                                            | K.CKVSNKALPAPIEK.T                         | 2 | 2.28 | 0.15 |       |
| IPI00448925 | IGHG1 protein                                            | K.DTLM*ISR.T                               | 2 | 2.48 | 0.09 | -3.74 |
| IPI00448925 | IGHG1 protein                                            | K.DTLMISR.T                                | 1 | 2.38 | 0.13 |       |
| IPI00448925 | IGHG1 protein                                            | K.DTLMISR.T                                | 2 | 2.45 | 0.16 |       |
| IPI00448925 | IGHG1 protein                                            | K.FNWYVDGVEVHNAK.T                         | 1 | 3.93 | 0.41 |       |
| IPI00448925 | IGHG1 protein                                            | K.FNWYVDGVEVHNAK.T                         | 2 | 5.51 | 0.51 |       |
| IPI00448925 | IGHG1 protein                                            | K.FNWYVDGVEVHNAK.T                         | 3 | 3.99 | 0.38 |       |
| IPI00448925 | IGHG1 protein                                            | K.GFYPSDIAVEWESNGQPENNYK.T                 | 2 | 4.88 | 0.31 |       |
| IPI00448925 | IGHG1 protein                                            | K.GFYPSDIAVEWESNGQPENNYK.T                 | 3 | 4.56 | 0.26 |       |
| IPI00448925 | IGHG1 protein                                            | K.GFYPSDIAVEWESNGQPENNYKTPPVLDSDGSFFLYSK.L | 3 | 4.64 | 0.25 |       |
| IPI00448925 | IGHG1 protein                                            | K.GPSVFPLAPSSK.S                           | 1 | 3.15 | 0.35 |       |
| IPI00448925 | IGHG1 protein                                            | K.GPSVFPLAPSSK.S                           | 2 | 3.30 | 0.36 |       |
| IPI00448925 | IGHG1 protein                                            | K.GPSVFPLAPSSKSTSGGTAALGCLVK.D             | 2 | 4.62 | 0.48 |       |
| IPI00448925 | IGHG1 protein                                            | K.GPSVFPLAPSSKSTSGGTAALGCLVK.D             | 3 | 4.18 | 0.48 |       |
| IPI00448925 | IGHG1 protein                                            | K.GQPREPQVYTLPPSR.E                        | 2 | 2.89 | 0.13 |       |
| IPI00448925 | IGHG1 protein                                            | K.GQPREPQVYTLPPSR.E                        | 3 | 2.92 | 0.17 |       |
| IPI00448925 | IGHG1 protein                                            | K.GQPREPQVYTLPPSRDELTK.N                   | 3 | 4.51 | 0.32 |       |
| IPI00448925 | IGHG1 protein                                            | K.NQVSLTCLVK.G                             | 1 | 2.26 | 0.22 |       |
| IPI00448925 | IGHG1 protein                                            | K.NQVSLTCLVK.G                             | 2 | 2.44 | 0.28 | -2.15 |
| IPI00448925 | IGHG1 protein                                            | K.NTSLQMNLSR.V                             | 2 | 2.21 | 0.22 |       |
| IPI00448925 | IGHG1 protein                                            | K.SCDKTHTCPAPPELLGGPSVFLFPPKPK.D           | 3 | 6.71 | 0.47 |       |
| IPI00448925 | IGHG1 protein                                            | K.THTCPAPPELLGGPSVFLFPPKPK.D               | 2 | 3.81 | 0.39 |       |
| IPI00448925 | IGHG1 protein                                            | K.THTCPAPPELLGGPSVFLFPPKPK.D               | 3 | 6.29 | 0.52 |       |
| IPI00448925 | IGHG1 protein                                            | K.TKPREEQYNSTYR.V                          | 2 | 2.99 | 0.10 |       |
| IPI00448925 | IGHG1 protein                                            | K.TTPPVLDSDGSFFLYSK.L                      | 1 | 3.22 | 0.41 |       |
| IPI00448925 | IGHG1 protein                                            | K.TTPPVLDSDGSFFLYSK.L                      | 2 | 3.42 | 0.37 |       |
| IPI00448925 | IGHG1 protein                                            | K.TTPPVLDSDGSFFLYSK.L                      | 3 | 4.11 | 0.39 |       |
| IPI00448925 | IGHG1 protein                                            | K.VSNKALPAPIEK.T                           | 2 | 3.33 | 0.18 |       |
| IPI00448925 | IGHG1 protein                                            | K.WYVDGVEVHNAK.T                           | 1 | 2.91 | 0.35 |       |
| IPI00448925 | IGHG1 protein                                            | K.WYVDGVEVHNAK.T                           | 2 | 3.90 | 0.46 |       |
| IPI00448925 | IGHG1 protein                                            | K.WYVDGVEVHNAK.T                           | 3 | 2.99 | 0.21 |       |
| IPI00448925 | IGHG1 protein                                            | R.CPAPELLGGPSVFLFPPKPK.D                   | 2 | 4.00 | 0.37 |       |
| IPI00448925 | IGHG1 protein                                            | R.CPAPELLGGPSVFLFPPKPK.D                   | 3 | 6.31 | 0.49 |       |
| IPI00448925 | IGHG1 protein                                            | R.CPAPELLGGPSVFLFPPKPKDTLM*ISR.T           | 3 | 3.77 | 0.23 |       |
| IPI00448925 | IGHG1 protein                                            | R.DNSKNTLSLQM*NSLR.V                       | 2 | 4.57 | 0.39 |       |
| IPI00448925 | IGHG1 protein                                            | R.DNSKNTLSLQM*NSLR.V                       | 3 | 4.23 | 0.17 |       |
| IPI00448925 | IGHG1 protein                                            | R.EPQVYTLPPSRDELTK.N                       | 2 | 3.97 | 0.21 |       |
| IPI00448925 | IGHG1 protein                                            | R.EPQVYTLPPSRDELTKNQVSLTCLVK.G             | 3 | 4.03 | 0.23 |       |

|             |                                                   |                                           |   |      |      |       |
|-------------|---------------------------------------------------|-------------------------------------------|---|------|------|-------|
| IPI00448925 | IGHG1 protein                                     | R.LSCAASGFR.F                             | 1 | 2.45 | 0.25 |       |
| IPI00448925 | IGHG1 protein                                     | R.LSCAASGFR.F                             | 2 | 2.63 | 0.35 |       |
| IPI00448925 | IGHG1 protein                                     | R.STSGGTAALGCLVK.D                        | 1 | 2.45 | 0.34 |       |
| IPI00448925 | IGHG1 protein                                     | R.STSGGTAALGCLVK.D                        | 2 | 4.37 | 0.45 |       |
| IPI00448925 | IGHG1 protein                                     | R.TPEVTCVVVDVSHED.P                       | 2 | 5.50 | 0.52 |       |
| IPI00448925 | IGHG1 protein                                     | R.VEDTAVYYCAK.D                           | 2 | 3.33 | 0.21 |       |
| IPI00448925 | IGHG1 protein                                     | R.VVSVLTVLHQDWLNGK.E                      | 1 | 4.22 | 0.41 |       |
| IPI00448925 | IGHG1 protein                                     | R.VVSVLTVLHQDWLNGK.E                      | 2 | 5.39 | 0.46 |       |
| IPI00448925 | IGHG1 protein                                     | R.VVSVLTVLHQDWLNGK.E                      | 3 | 3.42 | 0.38 |       |
| IPI00448925 | IGHG1 protein                                     | R.VVSVLTVLHQDWLNGKEYK.C                   | 2 | 5.56 | 0.40 |       |
| IPI00448925 | IGHG1 protein                                     | R.VVSVLTVLHQDWLNGKEYK.C                   | 3 | 4.97 | 0.40 |       |
| IPI00451429 | NIF3L1 isoform gamma                              | K.ALM*QVVDFLSR.N                          | 2 | 3.13 | 0.33 | -4.17 |
| IPI00451625 | Isoform 2 of Cartilage acidic protein 1 precursor | K.DEASSVEVTWPDGK.M                        | 2 | 3.14 | 0.28 | -4.90 |
| IPI00451625 | Isoform 2 of Cartilage acidic protein 1 precursor | K.FSM*PSPVR.T                             | 2 | 2.56 | 0.16 | -0.45 |
| IPI00451625 | Isoform 2 of Cartilage acidic protein 1 precursor | K.RLVNIAVDER.S                            | 2 | 2.28 | 0.09 | -0.73 |
| IPI00451625 | Isoform 2 of Cartilage acidic protein 1 precursor | K.VVLYTK.K                                | 1 | 1.74 | 0.12 | -1.08 |
| IPI00451625 | Isoform 2 of Cartilage acidic protein 1 precursor | K.VVLYTKK.S                               | 1 | 2.04 | 0.10 | -4.40 |
| IPI00451625 | Isoform 2 of Cartilage acidic protein 1 precursor | R.DKPVCVNTYGSYR.C                         | 2 | 3.46 | 0.43 |       |
| IPI00451625 | Isoform 2 of Cartilage acidic protein 1 precursor | R.DVAAEAGVSK.Y                            | 1 | 2.65 | 0.25 | -4.12 |
| IPI00451625 | Isoform 2 of Cartilage acidic protein 1 precursor | R.DVAAEAGVSK.Y                            | 2 | 3.61 | 0.39 | -2.63 |
| IPI00451625 | Isoform 2 of Cartilage acidic protein 1 precursor | R.EHGDPLIEELNPGDALEPEGR.G                 | 2 | 4.97 | 0.52 | -3.46 |
| IPI00451625 | Isoform 2 of Cartilage acidic protein 1 precursor | R.EHGDPLIEELNPGDALEPEGR.G                 | 3 | 4.15 | 0.37 | -3.53 |
| IPI00451625 | Isoform 2 of Cartilage acidic protein 1 precursor | R.GDGTFFVDAASAGVDDPHQHGR.G                | 3 | 2.60 | 0.20 | 0.70  |
| IPI00451625 | Isoform 2 of Cartilage acidic protein 1 precursor | R.GDGTFFVDAASAGVDDPHQHGR.G                | 4 | 3.57 | 0.39 | -3.21 |
| IPI00451625 | Isoform 2 of Cartilage acidic protein 1 precursor | R.GILALRDVAAEAGVSK.Y                      | 2 | 3.79 | 0.44 | -3.21 |
| IPI00451625 | Isoform 2 of Cartilage acidic protein 1 precursor | R.GILALRDVAAEAGVSK.Y                      | 3 | 5.18 | 0.42 | -1.96 |
| IPI00451625 | Isoform 2 of Cartilage acidic protein 1 precursor | R.GTGGVVTDFDGDGM*LDLILSHGESM*AQPLSVFR.G   | 3 | 5.25 | 0.50 | -4.29 |
| IPI00451625 | Isoform 2 of Cartilage acidic protein 1 precursor | R.GTGGVVTDFDGDGM*LDLILSHGESM*AQPLSVFR.G   | 4 | 3.48 | 0.13 | -3.76 |
| IPI00451625 | Isoform 2 of Cartilage acidic protein 1 precursor | R.GTGGVVTDFDGDGMLDLILSHGESM*AQPLSVFR.G    | 3 | 3.73 | 0.17 |       |
| IPI00451625 | Isoform 2 of Cartilage acidic protein 1 precursor | R.GVALADFNR.D                             | 1 | 1.99 | 0.07 | -6.83 |
| IPI00451625 | Isoform 2 of Cartilage acidic protein 1 precursor | R.GVALADFNR.D                             | 2 | 3.02 | 0.16 | -4.00 |
| IPI00451625 | Isoform 2 of Cartilage acidic protein 1 precursor | R.GVASLFAGR.S                             | 2 | 3.36 | 0.28 | -2.80 |
| IPI00451625 | Isoform 2 of Cartilage acidic protein 1 precursor | R.GVSVGPILSSASDIFCDNENGNPFLFHNHNR.G       | 3 | 4.91 | 0.55 | -4.03 |
| IPI00451625 | Isoform 2 of Cartilage acidic protein 1 precursor | R.IIDGGSGYLCEM*EPVAHFGLGK.D               | 2 | 1.82 | 0.18 | -1.71 |
| IPI00451625 | Isoform 2 of Cartilage acidic protein 1 precursor | R.IIDGGSGYLCEM*EPVAHFGLGK.D               | 3 | 3.35 | 0.38 | -1.21 |
| IPI00451625 | Isoform 2 of Cartilage acidic protein 1 precursor | R.IIDGGSGYLCEM*EPVAHFGLGKDEASSVEVTWPDGK.M | 4 | 4.96 | 0.44 | -3.67 |
| IPI00451625 | Isoform 2 of Cartilage acidic protein 1 precursor | R.LVNIADVDER.S                            | 1 | 2.46 | 0.37 | -3.18 |
| IPI00451625 | Isoform 2 of Cartilage acidic protein 1 precursor | R.LVNIADVDER.S                            | 2 | 3.31 | 0.30 | -2.05 |
| IPI00451625 | Isoform 2 of Cartilage acidic protein 1 precursor | R.LYLQM*STHGK.V                           | 1 | 1.54 | 0.11 | -3.74 |
| IPI00451625 | Isoform 2 of Cartilage acidic protein 1 precursor | R.LYLQM*STHGK.V                           | 2 | 2.76 | 0.32 | -3.79 |
| IPI00451625 | Isoform 2 of Cartilage acidic protein 1 precursor | R.NVASGEM*NSVLEILYPR.D                    | 2 | 3.50 | 0.30 | -3.78 |
| IPI00451625 | Isoform 2 of Cartilage acidic protein 1 precursor | R.NVASGEM*NSVLEILYPR.D                    | 3 | 2.65 | 0.12 | -2.39 |

|             |                                                                      |                                            |   |      |      |       |
|-------------|----------------------------------------------------------------------|--------------------------------------------|---|------|------|-------|
| IPI00451625 | Isoform 2 of Cartilage acidic protein 1 precursor                    | R.REHGDPLIEELNPGDALEPEGR.G                 | 3 | 3.95 | 0.30 | -4.86 |
| IPI00451625 | Isoform 2 of Cartilage acidic protein 1 precursor                    | R.SSPYYALR.D                               | 2 | 2.32 | 0.16 | -1.64 |
| IPI00451625 | Isoform 2 of Cartilage acidic protein 1 precursor                    | R.TVITADFDNDQLEIFFNNIAYR.S                 | 2 | 3.93 | 0.45 | -3.13 |
| IPI00451625 | Isoform 2 of Cartilage acidic protein 1 precursor                    | R.TVITADFDNDQLEIFFNNIAYR.S                 | 3 | 5.12 | 0.53 | -4.72 |
| IPI00451625 | Isoform 2 of Cartilage acidic protein 1 precursor                    | R.WEDILSDEVNVAR.G                          | 2 | 5.03 | 0.43 | -3.18 |
| IPI00451625 | Isoform 2 of Cartilage acidic protein 1 precursor                    | R.YSIYIANYAYGNVGPDALIEM*DPEASDLR.G         | 3 | 6.74 | 0.46 |       |
| IPI00451625 | Isoform 2 of Cartilage acidic protein 1 precursor                    | W.EDILSDEVNVAR.G                           | 2 | 3.55 | 0.21 | -3.35 |
| IPI00453473 | Histone H4                                                           | K.VFLENVIRDAVITYTEHAK.R                    | 3 | 4.96 | 0.39 | -4.37 |
| IPI00453473 | Histone H4                                                           | K.VFLENVIRDAVITYTEHAK.R                    | 4 | 2.84 | 0.17 | -3.05 |
| IPI00453473 | Histone H4                                                           | R.DAVITYTEHAK.R                            | 2 | 2.20 | 0.14 | -2.19 |
| IPI00453473 | Histone H4                                                           | R.DNIQGITKPAIR.R                           | 2 | 1.91 | 0.14 | -3.23 |
| IPI00453473 | Histone H4                                                           | R.GKGGKGLGKGGAKR.H                         | 2 | 2.99 | 0.34 | -2.80 |
| IPI00453473 | Histone H4                                                           | R.ISGLIYEETR.G                             | 2 | 3.12 | 0.23 | -3.90 |
| IPI00453473 | Histone H4                                                           | R.TLYGFGG.-                                | 1 | 1.59 | 0.14 | -2.30 |
| IPI00454695 | Histone H2B type 2-C                                                 | K.AQKKDGKKR.K                              | 2 | 2.40 | 0.14 | -2.43 |
| IPI00454695 | Histone H2B type 2-C                                                 | R.SRKESYSIYVYKVLK.Q                        | 4 | 4.66 | 0.39 | -2.44 |
| IPI00454858 | similar to alpha 3 type VI collagen isoform 1 precursor              | K.TGEALNNM*TQVFADTGRINVAR.Y                | 3 | 2.61 | 0.09 | -6.33 |
| IPI00454910 | Serine/threonine-protein kinase MRCK gamma                           | K.VSRGYLQALATKMAEELESRLNVGTQTLPARPLDHQWK.A | 3 | 2.93 | 0.12 | -2.58 |
| IPI00455521 | similar to transmembrane protein 46                                  | A.GAPEAQGPAAPGTTAPEGGDR.C                  | 2 | 5.04 | 0.61 | -1.89 |
| IPI00455667 | hypothetical protein LOC402665                                       | R.CEAM*AVPPADFQWYKDDR.L                    | 3 | 2.54 | 0.16 | -2.93 |
| IPI00455667 | hypothetical protein LOC402665                                       | R.DGFTSEGEILEISDIQR.G                      | 2 | 4.93 | 0.34 | -2.31 |
| IPI00455667 | hypothetical protein LOC402665                                       | R.DGFTSEGEILEISDIQR.G                      | 3 | 4.39 | 0.25 | -4.08 |
| IPI00455667 | hypothetical protein LOC402665                                       | R.LGASSASM*R.L                             | 2 | 2.69 | 0.33 | -1.64 |
| IPI00455667 | hypothetical protein LOC402665                                       | R.LLINTPEEFSILITEVGLGDEGLYTCSFQTR.H        | 3 | 5.07 | 0.43 | -2.99 |
| IPI00455667 | hypothetical protein LOC402665                                       | R.LLSSGTAEGLK.V                            | 1 | 2.15 | 0.31 | -3.61 |
| IPI00455667 | hypothetical protein LOC402665                                       | R.LLSSGTAEGLK.V                            | 2 | 3.13 | 0.13 | -1.51 |
| IPI00455667 | hypothetical protein LOC402665                                       | R.SM*LLFANVSAR.H                           | 2 | 3.51 | 0.24 | -2.58 |
| IPI00455667 | hypothetical protein LOC402665                                       | R.SNILYAGNDR.W                             | 1 | 2.62 | 0.11 | -2.12 |
| IPI00455667 | hypothetical protein LOC402665                                       | R.SNILYAGNDR.W                             | 2 | 3.34 | 0.34 | -0.28 |
| IPI00455667 | hypothetical protein LOC402665                                       | R.VLVTVNYPPPTITDVTSAR.T                    | 2 | 5.04 | 0.53 | -3.97 |
| IPI00455667 | hypothetical protein LOC402665                                       | R.VLVTVNYPPPTITDVTSAR.T                    | 3 | 3.53 | 0.19 | -1.59 |
| IPI00455739 | Isoform 1 of Beta-1,3-N-acetylglucosaminyltransferase lunatic fringe | K.WFCHVDDDNVNL.R.A                         | 2 | 3.11 | 0.30 |       |
| IPI00455739 | Isoform 1 of Beta-1,3-N-acetylglucosaminyltransferase lunatic fringe | P.AGAAPAPGLGAAAAAPGALVR.D                  | 2 | 3.52 | 0.42 | -2.30 |
| IPI00455739 | Isoform 1 of Beta-1,3-N-acetylglucosaminyltransferase lunatic fringe | R.DVYVGKPSLDRPIQAM*ER.V                    | 3 | 2.50 | 0.22 | -1.91 |
| IPI00455739 | Isoform 1 of Beta-1,3-N-acetylglucosaminyltransferase lunatic fringe | R.SLAGPAGAAPAPGLGAAAAAPGALVR.D             | 2 | 5.47 | 0.61 | -2.79 |
| IPI00455739 | Isoform 1 of Beta-1,3-N-acetylglucosaminyltransferase lunatic fringe | R.SLAGPAGAAPAPGLGAAAAAPGALVR.D             | 3 | 4.66 | 0.48 | -2.28 |

|             |                                                               |                                      |   |      |      |       |
|-------------|---------------------------------------------------------------|--------------------------------------|---|------|------|-------|
| IPI00455852 | Isoform 1 of Rho guanine nucleotide exchange factor 15        | R.QENAQKALGAVSKIIERCSAEVGRMK.Q       | 3 | 2.65 | 0.21 | 0.52  |
| IPI00455967 | Uncharacterized protein ENSP00000353619 (Fragment)            | R.QFVEFTIREAVRFK.K                   | 2 | 2.87 | 0.15 |       |
| IPI00456578 | LOC441054 protein                                             | K.QM*LPGGSKEMSDLQAGYFDPHFVR.I        | 4 | 2.22 | 0.12 | -6.91 |
| IPI00456589 | Isoform 1 of Polypeptide N-acetylgalactosaminyltransferase 11 | F.VYFNFSEVTQPLK.N                    | 2 | 4.46 | 0.27 | -4.19 |
| IPI00456589 | Isoform 1 of Polypeptide N-acetylgalactosaminyltransferase 11 | K.WDLVPLSELGR.A                      | 2 | 2.72 | 0.15 | -3.90 |
| IPI00456589 | Isoform 1 of Polypeptide N-acetylgalactosaminyltransferase 11 | R.LYHLQTNK.C                         | 2 | 1.96 | 0.08 | -2.58 |
| IPI00456589 | Isoform 1 of Polypeptide N-acetylgalactosaminyltransferase 11 | R.LYQVSVGQCLR.A                      | 2 | 2.79 | 0.17 | -1.03 |
| IPI00456599 | hypothetical protein LOC84792                                 | R.GPLGTCLAQVQQAGGGSDKLSKSLKKR.M      | 3 | 3.03 | 0.16 |       |
| IPI00456623 | Isoform 1 of Brevican core protein precursor                  | A.DVLEGDSSDR.A                       | 2 | 3.49 | 0.39 | -3.77 |
| IPI00456623 | Isoform 1 of Brevican core protein precursor                  | D.GGGGSSTPEDPAEAPR.T                 | 2 | 3.17 | 0.40 | -3.72 |
| IPI00456623 | Isoform 1 of Brevican core protein precursor                  | E.DGGGSSTPEDPAEAPR.T                 | 2 | 3.42 | 0.43 | -1.45 |
| IPI00456623 | Isoform 1 of Brevican core protein precursor                  | E.SRGAIYSIPIM*EDGGGSSTPEDPAEAPR.T    | 3 | 4.30 | 0.55 | -1.74 |
| IPI00456623 | Isoform 1 of Brevican core protein precursor                  | H.GIDDSSDAVEK.V                      | 2 | 3.26 | 0.34 | -2.71 |
| IPI00456623 | Isoform 1 of Brevican core protein precursor                  | K.GVVFLYR.E                          | 2 | 2.36 | 0.10 | -2.17 |
| IPI00456623 | Isoform 1 of Brevican core protein precursor                  | K.VKGVVFLYR.E                        | 1 | 2.15 | 0.19 | -3.40 |
| IPI00456623 | Isoform 1 of Brevican core protein precursor                  | K.VKGVVFLYR.E                        | 2 | 2.94 | 0.29 | -3.32 |
| IPI00456623 | Isoform 1 of Brevican core protein precursor                  | M.EDGGGSSTPEDPAEAPR.T                | 2 | 4.12 | 0.51 | -4.27 |
| IPI00456623 | Isoform 1 of Brevican core protein precursor                  | N.GELFLGDPPEKLTLEEAR.A               | 3 | 3.57 | 0.45 | -3.35 |
| IPI00456623 | Isoform 1 of Brevican core protein precursor                  | N.PASDGLEAIVTVTETLEELQLPQEATESESR.G  | 3 | 4.57 | 0.41 | -4.00 |
| IPI00456623 | Isoform 1 of Brevican core protein precursor                  | N.PASDGLEAIVTVTETLEELQLPQEATESESR.G  | 4 | 5.04 | 0.36 | -2.66 |
| IPI00456623 | Isoform 1 of Brevican core protein precursor                  | P.IM*EDGGGSSTPEDPAEAPR.T             | 2 | 4.21 | 0.60 | -1.67 |
| IPI00456623 | Isoform 1 of Brevican core protein precursor                  | R.ALHPEEDPEGR.Q                      | 1 | 2.58 | 0.31 | -3.12 |
| IPI00456623 | Isoform 1 of Brevican core protein precursor                  | R.ALHPEEDPEGR.Q                      | 2 | 2.72 | 0.30 | -3.66 |
| IPI00456623 | Isoform 1 of Brevican core protein precursor                  | R.ALHPEEDPEGR.Q                      | 3 | 3.01 | 0.21 | -3.82 |
| IPI00456623 | Isoform 1 of Brevican core protein precursor                  | R.CEVQHGIDDSSDAVEK.V                 | 2 | 5.47 | 0.59 | -3.60 |
| IPI00456623 | Isoform 1 of Brevican core protein precursor                  | R.CEVQHGIDDSSDAVEK.V                 | 3 | 5.69 | 0.55 | -3.17 |
| IPI00456623 | Isoform 1 of Brevican core protein precursor                  | R.CGGGLPGVK.T                        | 1 | 2.37 | 0.09 | -3.13 |
| IPI00456623 | Isoform 1 of Brevican core protein precursor                  | R.CGGGLPGVK.T                        | 2 | 2.42 | 0.11 | 0.06  |
| IPI00456623 | Isoform 1 of Brevican core protein precursor                  | R.CLCLPGYGGDLCDVGLR.F                | 2 | 4.01 | 0.47 | -2.46 |
| IPI00456623 | Isoform 1 of Brevican core protein precursor                  | R.EACYGDM*DGFPGVR.N                  | 2 | 4.12 | 0.60 | -4.47 |
| IPI00456623 | Isoform 1 of Brevican core protein precursor                  | R.EAEVLVAR.G                         | 1 | 2.37 | 0.21 | -3.40 |
| IPI00456623 | Isoform 1 of Brevican core protein precursor                  | R.EAEVLVAR.G                         | 2 | 2.55 | 0.18 | -3.31 |
| IPI00456623 | Isoform 1 of Brevican core protein precursor                  | R.ELEAPSEDNSGR.T                     | 2 | 2.14 | 0.12 | -0.49 |
| IPI00456623 | Isoform 1 of Brevican core protein precursor                  | R.FCNPGWDAFQGACYK.H                  | 2 | 4.65 | 0.58 | -3.56 |
| IPI00456623 | Isoform 1 of Brevican core protein precursor                  | R.FNVYCFR.D                          | 2 | 2.78 | 0.20 | -0.49 |
| IPI00456623 | Isoform 1 of Brevican core protein precursor                  | R.GAEIATTGQLYAAWDGGDLHCSPGWLADGSVR.Y | 3 | 5.58 | 0.58 | -5.64 |

|             |                                                                   |                                             |   |      |      |       |
|-------------|-------------------------------------------------------------------|---------------------------------------------|---|------|------|-------|
| IPI00456623 | Isoform 1 of Brevican core protein precursor                      | R.GAIYSIPIM*EDGGGGSSTPEDPAEAPR.T            | 2 | 4.50 | 0.57 | -4.74 |
| IPI00456623 | Isoform 1 of Brevican core protein precursor                      | R.GAIYSIPIM*EDGGGGSSTPEDPAEAPR.T            | 3 | 3.22 | 0.49 | -4.88 |
| IPI00456623 | Isoform 1 of Brevican core protein precursor                      | R.GRAEVLVAR.G                               | 2 | 4.12 | 0.29 | -3.24 |
| IPI00456623 | Isoform 1 of Brevican core protein precursor                      | R.IAGDAPLQGVLGGALTIPCHVHYLRPPPSR.R          | 3 | 4.43 | 0.59 | 1.77  |
| IPI00456623 | Isoform 1 of Brevican core protein precursor                      | R.IAGDAPLQGVLGGALTIPCHVHYLRPPPSR.R          | 4 | 4.89 | 0.38 | -3.98 |
| IPI00456623 | Isoform 1 of Brevican core protein precursor                      | R.IAGDAPLQGVLGGALTIPCHVHYLRPPPSR.R          | 5 | 4.06 | 0.41 | -3.65 |
| IPI00456623 | Isoform 1 of Brevican core protein precursor                      | R.IGAHATPEQLYAAYLGGYEQC DAGWLS DQTVR.Y      | 3 | 7.51 | 0.64 | -5.03 |
| IPI00456623 | Isoform 1 of Brevican core protein precursor                      | R.IGAHATPEQLYAAYLGGYEQC DAGWLS DQTVR.Y      | 4 | 4.65 | 0.34 | -2.66 |
| IPI00456623 | Isoform 1 of Brevican core protein precursor                      | R.IGAHATPEQLYAAYLGGYEQC DAGWLS DQTVR.Y      | 5 | 4.00 | 0.31 | -1.67 |
| IPI00456623 | Isoform 1 of Brevican core protein precursor                      | R.LRYEVDTVLR.Y                              | 2 | 2.34 | 0.20 | -3.90 |
| IPI00456623 | Isoform 1 of Brevican core protein precursor                      | R.M*YGAHLASISTPEEQDFINNR.Y                  | 2 | 5.73 | 0.48 | -3.49 |
| IPI00456623 | Isoform 1 of Brevican core protein precursor                      | R.M*YGAHLASISTPEEQDFINNR.Y                  | 3 | 3.16 | 0.30 | -2.67 |
| IPI00456623 | Isoform 1 of Brevican core protein precursor                      | R.NYGVVDPDDLVDVYCYAEDLNGELFLGDPPEK.L        | 3 | 4.18 | 0.28 |       |
| IPI00456623 | Isoform 1 of Brevican core protein precursor                      | R.NYGVVDPDDLVDVYCYAEDLNGELFLGDPPEKLTLEEAR.A | 3 | 5.08 | 0.59 | -3.85 |
| IPI00456623 | Isoform 1 of Brevican core protein precursor                      | R.NYGVVDPDDLVDVYCYAEDLNGELFLGDPPEKLTLEEAR.A | 4 | 6.18 | 0.47 | -2.54 |
| IPI00456623 | Isoform 1 of Brevican core protein precursor                      | R.RAVLGSPR.V                                | 2 | 2.39 | 0.11 | -3.92 |
| IPI00456623 | Isoform 1 of Brevican core protein precursor                      | R.VALPAYPASLTDVSLALSELRPNDSGIYR.C           | 3 | 2.35 | 0.30 | -5.53 |
| IPI00456623 | Isoform 1 of Brevican core protein precursor                      | R.VALPAYPASLTDVSLALSELRPNDSGIYR.C           | 4 | 3.12 | 0.29 | -3.81 |
| IPI00456623 | Isoform 1 of Brevican core protein precursor                      | R.VKVNEAYR.F                                | 1 | 2.15 | 0.13 | -5.23 |
| IPI00456623 | Isoform 1 of Brevican core protein precursor                      | R.VKVNEAYR.F                                | 2 | 3.20 | 0.28 | -3.13 |
| IPI00456623 | Isoform 1 of Brevican core protein precursor                      | R.WEAPQISCVPR.R                             | 2 | 3.23 | 0.39 | -3.22 |
| IPI00456623 | Isoform 1 of Brevican core protein precursor                      | R.YAFSFGAQEACAR.I                           | 2 | 5.01 | 0.53 | -4.32 |
| IPI00456623 | Isoform 1 of Brevican core protein precursor                      | R.YEVDTVLR.Y                                | 2 | 3.18 | 0.31 | -2.54 |
| IPI00456623 | Isoform 1 of Brevican core protein precursor                      | R.YPIQTPR.R                                 | 2 | 2.02 | 0.09 | -2.89 |
| IPI00456623 | Isoform 1 of Brevican core protein precursor                      | R.YPIVTPSQR.C                               | 1 | 2.01 | 0.11 | -0.42 |
| IPI00456623 | Isoform 1 of Brevican core protein precursor                      | R.YPIVTPSQR.C                               | 2 | 2.54 | 0.05 | -2.58 |
| IPI00456635 | Isoform 1 of Protein unc-13 homolog D                             | K.GQDDFLGNVLRQLDLR.C                        | 3 | 2.54 | 0.09 | -7.19 |
| IPI00456670 | Isoform 13 of Peroxisomal N(1)-acetyl-spermine/spermidine oxidase | -.M*ESTGSVGEAPGGGHGPR.R                     | 3 | 3.49 | 0.11 | -8.65 |
| IPI00456683 | Isoform 3 of Transcription elongation factor SPT6                 | R.LEDDDFDLIEENLGKVKR.R                      | 3 | 2.16 | 0.18 |       |
| IPI00456736 | Isoform 1 of RGM domain family member B precursor                 | K.CTTDFVSLTSHLNSAVDGFDFSEFCK.A              | 3 | 7.12 | 0.59 | -4.49 |
| IPI00456736 | Isoform 1 of RGM domain family member B precursor                 | K.VEGAWPLIDNNYLSVQVTNVPVPGSSATATNK.A        | 3 | 2.88 | 0.15 | -5.10 |
| IPI00456736 | Isoform 1 of RGM domain family member B precursor                 | K.VYQAVTDDLPAAFVDGTTSGGDSDAK.S              | 3 | 6.57 | 0.54 | -4.42 |
| IPI00456736 | Isoform 1 of RGM domain family member B precursor                 | R.GNLVYHSAVLGISDLM*SQR.N                    | 2 | 5.67 | 0.56 | -2.74 |
| IPI00456736 | Isoform 1 of RGM domain family member B precursor                 | R.GNLVYHSAVLGISDLM*SQR.N                    | 3 | 5.13 | 0.37 | -3.25 |
| IPI00456736 | Isoform 1 of RGM domain family member B precursor                 | R.IDDGQQQVSAILGH.S                          | 2 | 4.43 | 0.49 | -2.77 |



|             |                                                   |                                    |   |      |      |       |
|-------------|---------------------------------------------------|------------------------------------|---|------|------|-------|
| IPI00456736 | Isoform 1 of RGM domain family member B precursor | R.IDDGQQQVSAILGHSLPR.T             | 2 | 4.21 | 0.42 | -1.58 |
| IPI00456736 | Isoform 1 of RGM domain family member B precursor | R.IDDGQQQVSAILGHSLPR.T             | 3 | 4.76 | 0.49 | -2.15 |
| IPI00456736 | Isoform 1 of RGM domain family member B precursor | R.RGDQNPPSYLFCGLFGD.P              | 2 | 3.92 | 0.54 | -4.43 |
| IPI00456736 | Isoform 1 of RGM domain family member B precursor | R.YIGTTVFVR.Q                      | 1 | 1.36 | 0.07 | -3.12 |
| IPI00456736 | Isoform 1 of RGM domain family member B precursor | R.YIGTTVFVR.Q                      | 2 | 2.86 | 0.27 | -4.43 |
| IPI00456736 | Isoform 1 of RGM domain family member B precursor | R.YLTLAIR.M                        | 2 | 2.60 | 0.12 | -3.28 |
| IPI00456736 | Isoform 1 of RGM domain family member B precursor | S.ALEDVEALHPR.K                    | 2 | 3.18 | 0.34 | -2.16 |
| IPI00456827 | Protein FAM22G precursor                          | K.RKGDPLASRR.K                     | 1 | 2.05 | 0.09 |       |
| IPI00456969 | Dynein heavy chain, cytosolic                     | K.VAEVLFDAADANAIEEVNLAYENVK.E      | 3 | 3.13 | 0.25 | -1.67 |
| IPI00465016 | Isoform 2 of Sulfhydryl oxidase 1 precursor       | K.AHFSPSNIILDFPAAGSAAR.R           | 2 | 5.58 | 0.58 | -3.66 |
| IPI00465016 | Isoform 2 of Sulfhydryl oxidase 1 precursor       | K.AHFSPSNIILDFPAAGSAAR.R           | 3 | 4.87 | 0.55 | -3.00 |
| IPI00465016 | Isoform 2 of Sulfhydryl oxidase 1 precursor       | K.FGVTDFFPSCYLLFR.N                | 2 | 2.89 | 0.29 | -4.31 |
| IPI00465016 | Isoform 2 of Sulfhydryl oxidase 1 precursor       | K.IPYSFFK.T                        | 2 | 1.71 | 0.06 | -2.02 |
| IPI00465016 | Isoform 2 of Sulfhydryl oxidase 1 precursor       | K.TALDDRKEGAVLAK.K                 | 3 | 2.17 | 0.15 | -2.38 |
| IPI00465016 | Isoform 2 of Sulfhydryl oxidase 1 precursor       | R.EVALDLSQHK.G                     | 2 | 2.86 | 0.21 | -1.60 |
| IPI00465016 | Isoform 2 of Sulfhydryl oxidase 1 precursor       | R.KFGVTDFPSCYLLFR.N                | 3 | 3.63 | 0.30 | -2.59 |
| IPI00465016 | Isoform 2 of Sulfhydryl oxidase 1 precursor       | R.LAGAPSEDQPQPK.V                  | 2 | 3.53 | 0.40 | -4.10 |
| IPI00465016 | Isoform 2 of Sulfhydryl oxidase 1 precursor       | R.LDVPVWDVEATLNFLK.A               | 2 | 4.95 | 0.50 | -5.37 |
| IPI00465016 | Isoform 2 of Sulfhydryl oxidase 1 precursor       | R.LDVPVWDVEATLNFLK.A               | 3 | 6.31 | 0.53 | -4.39 |
| IPI00465016 | Isoform 2 of Sulfhydryl oxidase 1 precursor       | R.NNEEYLALIFEK.G                   | 2 | 4.20 | 0.37 | -5.06 |
| IPI00465016 | Isoform 2 of Sulfhydryl oxidase 1 precursor       | R.RVLNTEANVVR.K                    | 2 | 3.49 | 0.33 | -2.97 |
| IPI00465016 | Isoform 2 of Sulfhydryl oxidase 1 precursor       | R.RVLNTEANVVR.K                    | 3 | 2.69 | 0.18 | -2.76 |
| IPI00465016 | Isoform 2 of Sulfhydryl oxidase 1 precursor       | R.SALYSPSDPLTLLQADTVR.G            | 3 | 6.06 | 0.54 | -3.96 |
| IPI00465016 | Isoform 2 of Sulfhydryl oxidase 1 precursor       | R.SALYSPSDPLTLLQADTVRGAVLGSR.S     | 3 | 2.36 | 0.15 | -2.88 |
| IPI00465016 | Isoform 2 of Sulfhydryl oxidase 1 precursor       | R.SFYTAYLQR.L                      | 1 | 1.85 | 0.21 | -2.12 |
| IPI00465016 | Isoform 2 of Sulfhydryl oxidase 1 precursor       | R.SFYTAYLQR.L                      | 2 | 2.77 | 0.24 | -1.56 |
| IPI00465016 | Isoform 2 of Sulfhydryl oxidase 1 precursor       | R.VLNTEANVVR.K                     | 1 | 1.31 | 0.11 | -2.20 |
| IPI00465016 | Isoform 2 of Sulfhydryl oxidase 1 precursor       | R.VPVLN*ESR.S                      | 2 | 2.48 | 0.20 | -1.41 |
| IPI00465028 | Isoform 1 of Triosephosphate isomerase            | A.TPQQAQEVHEK.L                    | 2 | 3.58 | 0.30 | -2.03 |
| IPI00465028 | Isoform 1 of Triosephosphate isomerase            | K.DCGATWVVLGHSER.R                 | 3 | 1.88 | 0.18 | 0.87  |
| IPI00465028 | Isoform 1 of Triosephosphate isomerase            | K.ELASQPDVDGFLVGGASLKPEFVDIINAK.Q  | 2 | 3.87 | 0.52 | -4.87 |
| IPI00465028 | Isoform 1 of Triosephosphate isomerase            | K.ELASQPDVDGFLVGGASLKPEFVDIINAK.Q  | 3 | 3.07 | 0.34 | -4.88 |
| IPI00465028 | Isoform 1 of Triosephosphate isomerase            | K.ELASQPDVDGFLVGGASLKPEFVDIINAKQ.- | 3 | 4.44 | 0.46 | -4.23 |
| IPI00465028 | Isoform 1 of Triosephosphate isomerase            | K.FFVGGNWK.M                       | 2 | 2.29 | 0.16 | -0.47 |
| IPI00465028 | Isoform 1 of Triosephosphate isomerase            | K.IAVAAQNCYK.V                     | 2 | 3.46 | 0.35 | -2.30 |

|             |                                                                               |                                  |   |      |      |       |
|-------------|-------------------------------------------------------------------------------|----------------------------------|---|------|------|-------|
| IPI00465028 | Isoform 1 of Triosephosphate isomerase                                        | K.LDEREAGITEK.V                  | 3 | 3.32 | 0.27 | -3.29 |
| IPI00465028 | Isoform 1 of Triosephosphate isomerase                                        | K.QSLGELIGTLNAAK.V               | 1 | 1.24 | 0.10 | -3.95 |
| IPI00465028 | Isoform 1 of Triosephosphate isomerase                                        | K.QSLGELIGTLNAAK.V               | 2 | 4.86 | 0.48 | -4.27 |
| IPI00465028 | Isoform 1 of Triosephosphate isomerase                                        | K.QSLGELIGTLNAAK.V               | 3 | 3.40 | 0.32 | -3.50 |
| IPI00465028 | Isoform 1 of Triosephosphate isomerase                                        | K.SNVSDAVAQSTR.I                 | 1 | 3.07 | 0.37 | -2.93 |
| IPI00465028 | Isoform 1 of Triosephosphate isomerase                                        | K.SNVSDAVAQSTR.I                 | 2 | 4.56 | 0.43 | -2.80 |
| IPI00465028 | Isoform 1 of Triosephosphate isomerase                                        | K.TATPQQAQEVHEK.L                | 2 | 3.79 | 0.39 | -3.24 |
| IPI00465028 | Isoform 1 of Triosephosphate isomerase                                        | K.VAHALAEGLGVIACIGEK.L           | 2 | 5.98 | 0.35 | -3.84 |
| IPI00465028 | Isoform 1 of Triosephosphate isomerase                                        | K.VAHALAEGLGVIACIGEK.LDER.E      | 3 | 3.22 | 0.36 | -5.03 |
| IPI00465028 | Isoform 1 of Triosephosphate isomerase                                        | K.VIADNVK.D                      | 1 | 2.06 | 0.18 | -3.18 |
| IPI00465028 | Isoform 1 of Triosephosphate isomerase                                        | K.VPADTEVVCPPTAYIDFAR.Q          | 2 | 6.27 | 0.61 | -5.56 |
| IPI00465028 | Isoform 1 of Triosephosphate isomerase                                        | K.VPADTEVVCPPTAYIDFAR.Q          | 3 | 4.81 | 0.44 | -4.33 |
| IPI00465028 | Isoform 1 of Triosephosphate isomerase                                        | K.VTNGAFTGEISPGM*IK.D            | 2 | 4.94 | 0.45 | -4.00 |
| IPI00465028 | Isoform 1 of Triosephosphate isomerase                                        | K.VVFEQTK.V                      | 2 | 2.37 | 0.10 | -2.70 |
| IPI00465028 | Isoform 1 of Triosephosphate isomerase                                        | K.VVLAYEPVVAIGTGK.T              | 2 | 4.57 | 0.50 | -4.49 |
| IPI00465028 | Isoform 1 of Triosephosphate isomerase                                        | K.VVLAYEPVVAIGTGK.T              | 3 | 5.02 | 0.44 | -1.52 |
| IPI00465028 | Isoform 1 of Triosephosphate isomerase                                        | R.HVFGESDELIGQK.V                | 2 | 3.54 | 0.48 | -3.47 |
| IPI00465028 | Isoform 1 of Triosephosphate isomerase                                        | R.HVFGESDELIGQK.V                | 3 | 2.62 | 0.08 | -4.07 |
| IPI00465028 | Isoform 1 of Triosephosphate isomerase                                        | R.IYGGSVTGATCK.E                 | 1 | 2.83 | 0.51 | -1.43 |
| IPI00465028 | Isoform 1 of Triosephosphate isomerase                                        | R.IYGGSVTGATCK.E                 | 2 | 3.84 | 0.47 | -2.54 |
| IPI00465028 | Isoform 1 of Triosephosphate isomerase                                        | R.KQSLGELIGTLNAAK.V              | 2 | 5.04 | 0.49 | -3.87 |
| IPI00465028 | Isoform 1 of Triosephosphate isomerase                                        | R.KQSLGELIGTLNAAK.V              | 3 | 3.44 | 0.20 | -2.55 |
| IPI00465028 | Isoform 1 of Triosephosphate isomerase                                        | R.RHVFGESDELIGQK.V               | 2 | 3.99 | 0.23 | -4.57 |
| IPI00465028 | Isoform 1 of Triosephosphate isomerase                                        | R.RHVFGESDELIGQK.V               | 3 | 4.39 | 0.41 | -3.63 |
| IPI00465044 | Protein RCC2                                                                  | R.YGCLAGVVRVTVVSGSCAAHSLITTEGK.L | 3 | 2.83 | 0.09 | -8.92 |
| IPI00465045 | DIP2 disco-interacting protein 2 homolog B                                    | K.M*ALPM*PTK.R                   | 2 | 1.29 | 0.10 | -6.54 |
| IPI00465123 | KIAA0415 gene product                                                         | K.FCSRICKLLQAEDLGPDTLDSLQR.L     | 3 | 2.56 | 0.08 | 0.08  |
| IPI00465178 | Isoform 1 of Vacuolar proton translocating ATPase 116 kDa subunit a isoform 1 | R.SEEMTLAQLFLQSEAYCCVSELGELGK.V  | 3 | 4.68 | 0.42 | -2.48 |
| IPI00465184 | Guanine deaminase                                                             | K.ASDSPIDLFGDFFGDISEAVIQK.F      | 2 | 6.41 | 0.61 | -3.57 |
| IPI00465184 | Guanine deaminase                                                             | K.ASDSPIDLFGDFFGDISEAVIQK.F      | 3 | 5.10 | 0.45 | -4.60 |
| IPI00465184 | Guanine deaminase                                                             | K.FLYLGDDRNIEEYVGGK.Q            | 2 | 4.56 | 0.34 | -2.39 |
| IPI00465184 | Guanine deaminase                                                             | K.FLYLGDDRNIEEYVGGK.Q            | 3 | 2.70 | 0.22 | -2.22 |
| IPI00465184 | Guanine deaminase                                                             | K.IGLGTDVAGGYSYSM*LDAIRR.A       | 3 | 2.50 | 0.13 | -1.08 |
| IPI00465184 | Guanine deaminase                                                             | K.IVFLEASQKEK.L                  | 2 | 3.31 | 0.20 | -1.85 |
| IPI00465184 | Guanine deaminase                                                             | K.NYTSVYDKNNLLTNK.T              | 2 | 2.50 | 0.18 | -3.25 |
| IPI00465184 | Guanine deaminase                                                             | K.SLTLKEVFR.L                    | 2 | 2.59 | 0.14 | -2.90 |
| IPI00465184 | Guanine deaminase                                                             | K.VCMDLNDTFPEYK.E                | 2 | 2.65 | 0.07 |       |
| IPI00465184 | Guanine deaminase                                                             | R.AVM*VSNILLINKVNEK.S            | 2 | 3.58 | 0.26 | -1.86 |
| IPI00465184 | Guanine deaminase                                                             | R.DLHIQSHISENRDEVEAVKNLYPSYK.N   | 3 | 5.45 | 0.37 | -4.07 |
| IPI00465184 | Guanine deaminase                                                             | R.DLHIQSHISENRDEVEAVKNLYPSYK.N   | 4 | 4.08 | 0.52 | -2.61 |
| IPI00465184 | Guanine deaminase                                                             | R.DLHIQSHISENRDEVEAVKNLYPSYK.N   | 5 | 2.74 | 0.23 | -0.97 |

|             |                                                      |                                       |   |      |      |       |
|-------------|------------------------------------------------------|---------------------------------------|---|------|------|-------|
| IPI00465184 | Guanine deaminase                                    | R.FQNIDFAEEVYTR.V                     | 2 | 4.42 | 0.38 | -0.39 |
| IPI00465184 | Guanine deaminase                                    | R.FVSEM*LQK.N                         | 2 | 2.27 | 0.13 | -1.39 |
| IPI00465184 | Guanine deaminase                                    | R.LATLGGSQLGLDGEIGNFEVKGKFEFDAILNPK.A | 3 | 6.93 | 0.57 | -5.23 |
| IPI00465184 | Guanine deaminase                                    | R.LATLGGSQLGLDGEIGNFEVKGKFEFDAILNPK.A | 4 | 3.32 | 0.34 | -5.46 |
| IPI00465184 | Guanine deaminase                                    | R.NIEEVYVGGK.Q                        | 2 | 2.39 | 0.13 | -3.58 |
| IPI00465184 | Guanine deaminase                                    | R.VKPIVTPR.F                          | 2 | 1.66 | 0.13 | -3.80 |
| IPI00465234 | Cytokine receptor common beta chain precursor        | R.HHCQIPVDPATHGQYIVSVQPR.R            | 3 | 3.26 | 0.14 |       |
| IPI00465248 | Isoform alpha-enolase of Alpha-enolase               | K.AGYTDKVVIGMDVAASEFFR.S              | 3 | 3.53 | 0.33 | -3.87 |
| IPI00465248 | Isoform alpha-enolase of Alpha-enolase               | K.DATNVGDEGGFAPNILENK.E               | 2 | 4.99 | 0.46 | -4.67 |
| IPI00465248 | Isoform alpha-enolase of Alpha-enolase               | K.DATNVGDEGGFAPNILENKEGLELLK.T        | 3 | 4.34 | 0.08 | -2.95 |
| IPI00465248 | Isoform alpha-enolase of Alpha-enolase               | K.FTASAGIQVVGDDLTVTNPKR.I             | 3 | 3.36 | 0.32 | -6.12 |
| IPI00465248 | Isoform alpha-enolase of Alpha-enolase               | K.KLVNTEQEK.I                         | 2 | 2.25 | 0.12 | -1.08 |
| IPI00465248 | Isoform alpha-enolase of Alpha-enolase               | K.LAM*QEFM*ILPVGAANFR.E               | 2 | 4.92 | 0.48 | -4.43 |
| IPI00465248 | Isoform alpha-enolase of Alpha-enolase               | K.LAM*QEFM*ILPVGAANFR.E               | 3 | 2.48 | 0.14 | -2.99 |
| IPI00465248 | Isoform alpha-enolase of Alpha-enolase               | K.LM*IEM*DGTEENK.S                    | 2 | 2.73 | 0.23 | -3.68 |
| IPI00465248 | Isoform alpha-enolase of Alpha-enolase               | K.SFIKDYPVVSIEDPFDQDDWGAWQK.F         | 3 | 5.91 | 0.36 | -6.36 |
| IPI00465248 | Isoform alpha-enolase of Alpha-enolase               | K.TIAPALVSK.K                         | 1 | 1.57 | 0.19 | -1.91 |
| IPI00465248 | Isoform alpha-enolase of Alpha-enolase               | K.YGKDATNVGDEGGFAPNILENK.E            | 3 | 4.34 | 0.28 | -1.95 |
| IPI00465248 | Isoform alpha-enolase of Alpha-enolase               | R.AAVPSGASTGIYEALER.D                 | 2 | 5.65 | 0.33 | -8.46 |
| IPI00465248 | Isoform alpha-enolase of Alpha-enolase               | R.AAVPSGASTGIYEALER.D                 | 3 | 4.37 | 0.39 | -3.26 |
| IPI00465248 | Isoform alpha-enolase of Alpha-enolase               | R.GNPTVEVDLFTSK.G                     | 2 | 2.97 | 0.33 | -3.07 |
| IPI00465248 | Isoform alpha-enolase of Alpha-enolase               | R.HIADLAGNSEVILPVPAFNVINGGSHAGNK.L    | 3 | 6.05 | 0.49 | -4.48 |
| IPI00465248 | Isoform alpha-enolase of Alpha-enolase               | R.HIADLAGNSEVILPVPAFNVINGGSHAGNK.L    | 4 | 3.08 | 0.14 | -3.80 |
| IPI00465248 | Isoform alpha-enolase of Alpha-enolase               | R.IEEELGSK.A                          | 1 | 1.95 | 0.09 | -2.48 |
| IPI00465248 | Isoform alpha-enolase of Alpha-enolase               | R.SGETEDTFIADLVVGLCTGQIK.T            | 2 | 5.97 | 0.60 | -5.74 |
| IPI00465248 | Isoform alpha-enolase of Alpha-enolase               | R.SGETEDTFIADLVVGLCTGQIK.T            | 3 | 4.50 | 0.40 | -3.18 |
| IPI00465248 | Isoform alpha-enolase of Alpha-enolase               | R.SGKYDLDFKSPDDPSR.Y                  | 3 | 2.58 | 0.28 | -2.19 |
| IPI00465248 | Isoform alpha-enolase of Alpha-enolase               | R.YISPDQLADLYK.G                      | 2 | 3.75 | 0.43 | -4.16 |
| IPI00465255 | Isoform 1 of Proline-rich acidic protein 1 precursor | K.AWM*ETEDTLGR.V                      | 2 | 3.03 | 0.41 | 0.74  |
| IPI00465255 | Isoform 1 of Proline-rich acidic protein 1 precursor | K.LLTTEEKPR.G                         | 2 | 2.19 | 0.26 | -1.56 |
| IPI00465255 | Isoform 1 of Proline-rich acidic protein 1 precursor | R.VLSPEPDHDSLYHPPPEEDQGEERPR.L        | 3 | 4.33 | 0.50 | -2.89 |
| IPI00465255 | Isoform 1 of Proline-rich acidic protein 1 precursor | R.VLSPEPDHDSLYHPPPEEDQGEERPR.L        | 4 | 3.31 | 0.27 | -2.36 |
| IPI00465255 | Isoform 1 of Proline-rich acidic protein 1 precursor | R.VVEPPEKDDQLVVLFPVQKPK.L             | 2 | 3.85 | 0.30 | -4.57 |
| IPI00465255 | Isoform 1 of Proline-rich acidic protein 1 precursor | R.VVEPPEKDDQLVVLFPVQKPK.L             | 3 | 4.70 | 0.29 | -1.83 |
| IPI00465261 | Isoform 1 of Endoplasmic reticulum aminopeptidase 2  | K.TQNLAALLHAIAR.R                     | 3 | 2.48 | 0.37 | -2.87 |
| IPI00465261 | Isoform 1 of Endoplasmic reticulum aminopeptidase 2  | R.ILAVTDFEPTQAR.M                     | 2 | 4.26 | 0.44 | -2.47 |
| IPI00465315 | Cytochrome c                                         | K.TGPNLHGLFGR.K                       | 1 | 2.56 | 0.29 | -2.08 |
| IPI00465315 | Cytochrome c                                         | K.TGPNLHGLFGR.K                       | 2 | 3.13 | 0.35 | -1.27 |
| IPI00465315 | Cytochrome c                                         | K.TGPNLHGLFGR.K                       | 2 | 2.76 | 0.34 | -4.41 |
| IPI00465315 | Cytochrome c                                         | R.ADLIAYLK.K                          | 2 | 2.92 | 0.26 | -3.22 |

|             |                                                     |                                            |   |      |      |       |
|-------------|-----------------------------------------------------|--------------------------------------------|---|------|------|-------|
| IPI00465322 | Uncharacterized protein BOC                         | K.CAAYNPVTQEVK.T                           | 2 | 2.99 | 0.37 | -3.59 |
| IPI00465322 | Uncharacterized protein BOC                         | R.FLLSNLLIDTTSEEDSGTYR.C                   | 3 | 3.62 | 0.33 | -5.05 |
| IPI00465325 | leucine-rich repeat neuronal 6A                     | K.EFKDFPDVLLPNYFTCR.R                      | 2 | 4.27 | 0.46 | -3.66 |
| IPI00465325 | leucine-rich repeat neuronal 6A                     | K.SLEVGDNLDVYISHR.A                        | 2 | 4.25 | 0.45 | -2.84 |
| IPI00465325 | leucine-rich repeat neuronal 6A                     | K.SLEVGDNLDVYISHR.A                        | 3 | 2.69 | 0.07 | -2.25 |
| IPI00465325 | leucine-rich repeat neuronal 6A                     | K.TLNQDEFASFPHLEELNENIVSAVEPGAFNNLFNLR.T   | 3 | 5.32 | 0.56 | -3.19 |
| IPI00465325 | leucine-rich repeat neuronal 6A                     | K.TLNQDEFASFPHLEELNENIVSAVEPGAFNNLFNLR.T   | 4 | 4.34 | 0.16 | -4.27 |
| IPI00465325 | leucine-rich repeat neuronal 6A                     | R.ADGDPPPAILWLSPR.K                        | 2 | 3.68 | 0.35 | -4.17 |
| IPI00465325 | leucine-rich repeat neuronal 6A                     | R.AFSGLNSLEQLTLEK.C                        | 2 | 4.48 | 0.33 | -4.16 |
| IPI00465325 | leucine-rich repeat neuronal 6A                     | R.ATVPPFDIK.T                              | 2 | 1.54 | 0.07 | -3.38 |
| IPI00465325 | leucine-rich repeat neuronal 6A                     | R.FVAVPEGIPTETR.L                          | 2 | 3.56 | 0.23 | -3.72 |
| IPI00465325 | leucine-rich repeat neuronal 6A                     | R.IKTLNQDEFASFPHLEELNENIVSAVEPGAFNNLFNLR.T | 4 | 3.95 | 0.32 | -3.91 |
| IPI00465325 | leucine-rich repeat neuronal 6A                     | R.LQEIQLVGGQLAVVEPYAFR.G                   | 3 | 5.36 | 0.35 | -5.63 |
| IPI00465325 | leucine-rich repeat neuronal 6A                     | R.LTVFPDGTLEVR.Y                           | 2 | 2.89 | 0.25 | -3.57 |
| IPI00465325 | leucine-rich repeat neuronal 6A                     | R.QQPTCATPEFVQGK.E                         | 2 | 3.49 | 0.47 | -2.09 |
| IPI00465363 | Histone H2B type 1-A                                | R.LLLPGELAK.H                              | 2 | 2.25 | 0.08 | -2.29 |
| IPI00465377 | Isoform 1 of Matrix-remodeling-associated protein 7 | G.LGELGEPAGPEPEPGDPAAAPAEAEQAVEAR.Q        | 3 | 4.85 | 0.45 | -3.09 |
| IPI00465377 | Isoform 1 of Matrix-remodeling-associated protein 7 | R.QEEEEQLDGEKGPSSEGEPEEEDGEGFSFK.Y         | 3 | 5.35 | 0.41 | -1.93 |
| IPI00465377 | Isoform 1 of Matrix-remodeling-associated protein 7 | R.VQKEQLAAIFK.L                            | 3 | 2.96 | 0.20 | -3.40 |
| IPI00465436 | Catalase                                            | K.ADVLTGAGNPVGDKLNIVTGPR.G                 | 3 | 4.17 | 0.37 | -1.98 |
| IPI00465436 | Catalase                                            | K.FYTEDGNWDLVGNNTPIFFIRDPIPFPSFIHSQK.R     | 4 | 2.65 | 0.23 | -4.20 |
| IPI00465436 | Catalase                                            | K.LVLNRNPVNYFAEVEQIAFDPSNM*PPGIEASPK.M     | 3 | 4.36 | 0.30 | -2.92 |
| IPI00465436 | Catalase                                            | R.AAQKADVLTGAGNPVGDKLNIVTGPR.G             | 3 | 5.32 | 0.46 | -1.45 |
| IPI00465436 | Catalase                                            | R.AAQKADVLTGAGNPVGDKLNIVTGPR.G             | 4 | 3.69 | 0.41 | 0.54  |
| IPI00465436 | Catalase                                            | R.AFYVNVLNNEEQR.K                          | 2 | 4.31 | 0.37 | -2.78 |
| IPI00465436 | Catalase                                            | R.FNTANDDNVTQVR.A                          | 2 | 4.61 | 0.40 | -1.78 |
| IPI00465436 | Catalase                                            | R.NPQTHLKDPDMVWDFWVSLRPESLHQVSFLFSDR.G     | 4 | 5.13 | 0.48 | -2.87 |
| IPI00465439 | Fructose-bisphosphate aldolase A                    | K.AAQEEYVKR.A                              | 2 | 3.08 | 0.26 | -5.06 |
| IPI00465439 | Fructose-bisphosphate aldolase A                    | K.ADDGRPPQVIK.S                            | 3 | 2.32 | 0.19 | -1.75 |
| IPI00465439 | Fructose-bisphosphate aldolase A                    | K.ELSDIAHR.I                               | 1 | 2.00 | 0.24 | -1.67 |
| IPI00465439 | Fructose-bisphosphate aldolase A                    | K.ELSDIAHR.I                               | 2 | 2.11 | 0.20 | -1.68 |
| IPI00465439 | Fructose-bisphosphate aldolase A                    | K.ENLKAAQEEYVKR.A                          | 2 | 3.47 | 0.28 | -3.33 |
| IPI00465439 | Fructose-bisphosphate aldolase A                    | K.ENLKAAQEEYVKR.A                          | 3 | 2.17 | 0.21 | -2.91 |
| IPI00465439 | Fructose-bisphosphate aldolase A                    | K.FSHEEIAM*ATVTALR.R                       | 3 | 3.31 | 0.30 | -1.48 |
| IPI00465439 | Fructose-bisphosphate aldolase A                    | K.FSHEEIAM*ATVTALRR.T                      | 2 | 2.47 | 0.29 | -3.24 |
| IPI00465439 | Fructose-bisphosphate aldolase A                    | K.FSHEEIAM*ATVTALRR.T                      | 3 | 2.09 | 0.16 | -3.76 |
| IPI00465439 | Fructose-bisphosphate aldolase A                    | K.FSHEEIAM*ATVTALRR.T                      | 4 | 3.04 | 0.29 | -3.17 |
| IPI00465439 | Fructose-bisphosphate aldolase A                    | K.GGVGIVKVDK.G                             | 1 | 2.34 | 0.18 | -3.56 |
| IPI00465439 | Fructose-bisphosphate aldolase A                    | K.GGVGIVKVDK.G                             | 2 | 2.05 | 0.07 | -3.10 |

|             |                                                                                                    |                                         |   |      |      |       |
|-------------|----------------------------------------------------------------------------------------------------|-----------------------------------------|---|------|------|-------|
| IPI00465439 | Fructose-bisphosphate aldolase A                                                                   | K.GILAADESTGSIKR                        | 2 | 4.81 | 0.53 | -3.64 |
| IPI00465439 | Fructose-bisphosphate aldolase A                                                                   | K.GILAADESTGSIKR.L                      | 2 | 4.11 | 0.56 | -2.51 |
| IPI00465439 | Fructose-bisphosphate aldolase A                                                                   | K.GVVPLAGTNGETTTQGLDGLSER.C             | 2 | 5.76 | 0.60 | -3.93 |
| IPI00465439 | Fructose-bisphosphate aldolase A                                                                   | K.GVVPLAGTNGETTTQGLDGLSER.C             | 3 | 4.29 | 0.43 | -3.28 |
| IPI00465439 | Fructose-bisphosphate aldolase A                                                                   | K.IGEHTPSALAIM*ENANVLAR.Y               | 2 | 5.04 | 0.51 | -1.09 |
| IPI00465439 | Fructose-bisphosphate aldolase A                                                                   | K.IGEHTPSALAIM*ENANVLAR.Y               | 3 | 5.16 | 0.39 | -4.58 |
| IPI00465439 | Fructose-bisphosphate aldolase A                                                                   | K.KDGADFAK.W                            | 2 | 2.14 | 0.07 | -3.90 |
| IPI00465439 | Fructose-bisphosphate aldolase A                                                                   | K.RLQSIGTENTEENRR.F                     | 2 | 3.00 | 0.09 | -4.55 |
| IPI00465439 | Fructose-bisphosphate aldolase A                                                                   | K.RLQSIGTENTEENRR.F                     | 3 | 3.38 | 0.22 | -3.03 |
| IPI00465439 | Fructose-bisphosphate aldolase A                                                                   | K.SKGGVVGIKVDKGVVPLAGTNGETTTQGLDGLSER.C | 5 | 3.90 | 0.30 | -1.29 |
| IPI00465439 | Fructose-bisphosphate aldolase A                                                                   | K.VDKGVVPLAGTNGETTTQGLDGLSER.C          | 2 | 4.76 | 0.54 | -3.66 |
| IPI00465439 | Fructose-bisphosphate aldolase A                                                                   | K.VDKGVVPLAGTNGETTTQGLDGLSER.C          | 3 | 5.22 | 0.57 | -2.67 |
| IPI00465439 | Fructose-bisphosphate aldolase A                                                                   | K.VLAAVYK.A                             | 1 | 2.13 | 0.18 | -2.77 |
| IPI00465439 | Fructose-bisphosphate aldolase A                                                                   | K.YTPSQGAGAAASESLFVSNHAY.-              | 2 | 5.19 | 0.59 | -3.44 |
| IPI00465439 | Fructose-bisphosphate aldolase A                                                                   | K.YTPSQGAGAAASESLFVSNHAY.-              | 3 | 2.26 | 0.11 | -4.64 |
| IPI00465439 | Fructose-bisphosphate aldolase A                                                                   | M.PYQYPALTPEQK.K                        | 2 | 3.70 | 0.34 | -5.87 |
| IPI00465439 | Fructose-bisphosphate aldolase A                                                                   | M.PYQYPALTPEQKK.E                       | 2 | 4.10 | 0.29 | -3.78 |
| IPI00465439 | Fructose-bisphosphate aldolase A                                                                   | M.PYQYPALTPEQKK.E                       | 3 | 3.96 | 0.31 | -1.77 |
| IPI00465439 | Fructose-bisphosphate aldolase A                                                                   | Q.YPALTPEQKK.E                          | 2 | 2.93 | 0.26 | -2.76 |
| IPI00465439 | Fructose-bisphosphate aldolase A                                                                   | R.ALANSLACQ GK.Y                        | 2 | 3.45 | 0.40 | -0.95 |
| IPI00465439 | Fructose-bisphosphate aldolase A                                                                   | R.ALQASALK.A                            | 1 | 1.97 | 0.10 | -2.20 |
| IPI00465439 | Fructose-bisphosphate aldolase A                                                                   | R.ALQASALK.A                            | 2 | 2.42 | 0.17 | -2.60 |
| IPI00465439 | Fructose-bisphosphate aldolase A                                                                   | R.LQSIGTENTEENRR.F                      | 2 | 3.04 | 0.12 | -2.92 |
| IPI00465439 | Fructose-bisphosphate aldolase A                                                                   | R.QLLLTADDR.V                           | 2 | 2.68 | 0.14 | -3.14 |
| IPI00465439 | Fructose-bisphosphate aldolase A                                                                   | R.TVPPAVTGITFLSGGQSEEEASINLNAINK.C      | 3 | 4.59 | 0.46 | -4.85 |
| IPI00465439 | Fructose-bisphosphate aldolase A                                                                   | R.YASICQQNGIVPIVEPEILPDGDHDLK.R         | 3 | 5.54 | 0.40 | -3.38 |
| IPI00465439 | Fructose-bisphosphate aldolase A                                                                   | R.YASICQQNGIVPIVEPEILPDGDHDLK.R.C       | 3 | 5.22 | 0.45 | -2.41 |
| IPI00465439 | Fructose-bisphosphate aldolase A                                                                   | V.PIVEPEILPDGDHDLK.R.C                  | 2 | 4.43 | 0.48 | -3.39 |
| IPI00470468 | Isoform 3 of Protein EFR3 homolog A                                                                | K.EENPAVLAENCFRELLGR.A                  | 2 | 2.24 | 0.11 | -0.57 |
| IPI00470484 | Isoform 1 of EGF-like, fibronectin type-III and laminin G-like domain-containing protein precursor | K.GLDPDTNYQFAVR.A                       | 2 | 3.37 | 0.41 | -2.05 |
| IPI00470484 | Isoform 1 of EGF-like, fibronectin type-III and laminin G-like domain-containing protein precursor | K.ITVDDYGAR.T                           | 2 | 2.36 | 0.22 | -2.21 |
| IPI00470484 | Isoform 1 of EGF-like, fibronectin type-III and laminin G-like domain-containing protein precursor | K.NSGVLKPFSGSIQK.I                      | 2 | 2.79 | 0.12 | -3.05 |
| IPI00470484 | Isoform 1 of EGF-like, fibronectin type-III and laminin G-like domain-containing protein precursor | K.VGPPLDIK.L                            | 2 | 2.10 | 0.11 | -3.46 |
| IPI00470490 | Isoform 1 of Nuclear receptor coactivator 1                                                        | R.M*DGAVTSVTIKSEILPASLQSATAR.P          | 3 | 3.51 | 0.28 | -6.96 |
| IPI00470535 | Dihydropyridine receptor alpha 2 subunit                                                           | A.VEM*EDDDFTASLSK.Q                     | 2 | 4.16 | 0.48 | -3.90 |
| IPI00470535 | Dihydropyridine receptor alpha 2 subunit                                                           | E.EPFPSAVTIK.S                          | 1 | 2.24 | 0.17 | -3.53 |
| IPI00470535 | Dihydropyridine receptor alpha 2 subunit                                                           | K.AVEIYIQGK.L                           | 1 | 3.08 | 0.21 | -3.21 |
| IPI00470535 | Dihydropyridine receptor alpha 2 subunit                                                           | K.AVEIYIQGK.L                           | 2 | 3.14 | 0.33 | -3.43 |

|             |                                          |                                |   |      |      |       |
|-------------|------------------------------------------|--------------------------------|---|------|------|-------|
| IPI00470535 | Dihydropyridine receptor alpha 2 subunit | K.DSETLKPDNFEESGYTFIAPR.D      | 3 | 3.23 | 0.34 | -3.22 |
| IPI00470535 | Dihydropyridine receptor alpha 2 subunit | K.EAGENWQENPETYEDSFYKR.S       | 3 | 3.84 | 0.41 | -2.36 |
| IPI00470535 | Dihydropyridine receptor alpha 2 subunit | K.GITDYKK.G                    | 1 | 1.72 | 0.07 | -2.81 |
| IPI00470535 | Dihydropyridine receptor alpha 2 subunit | K.GYFFEIPSIGAIR.I              | 1 | 1.54 | 0.36 | -3.99 |
| IPI00470535 | Dihydropyridine receptor alpha 2 subunit | K.GYFFEIPSIGAIR.I              | 2 | 3.77 | 0.34 | -5.12 |
| IPI00470535 | Dihydropyridine receptor alpha 2 subunit | K.IDLYDVR.R                    | 2 | 2.38 | 0.25 | -2.33 |
| IPI00470535 | Dihydropyridine receptor alpha 2 subunit | K.IIM*LFTDGGGEER.A             | 2 | 4.73 | 0.45 | -4.08 |
| IPI00470535 | Dihydropyridine receptor alpha 2 subunit | K.IIM*LFTDGGGEERAQEIFNK.Y      | 3 | 3.30 | 0.30 | -2.14 |
| IPI00470535 | Dihydropyridine receptor alpha 2 subunit | K.IIM*LFTDGGGEERAQEIFNKYNK.D   | 3 | 3.24 | 0.27 | -2.35 |
| IPI00470535 | Dihydropyridine receptor alpha 2 subunit | K.IIMLFTDGGGEER.A              | 2 | 2.66 | 0.36 | -5.79 |
| IPI00470535 | Dihydropyridine receptor alpha 2 subunit | K.KIDLYDVR.R                   | 2 | 2.11 | 0.05 | -3.74 |
| IPI00470535 | Dihydropyridine receptor alpha 2 subunit | K.LLKPAVVGII.I                 | 1 | 2.51 | 0.23 | -4.13 |
| IPI00470535 | Dihydropyridine receptor alpha 2 subunit | K.LLKPAVVGII.I                 | 2 | 1.38 | 0.06 | -0.63 |
| IPI00470535 | Dihydropyridine receptor alpha 2 subunit | K.M*KDSETLKPDNFEESGYTFIAPR.D   | 2 | 3.42 | 0.44 | -3.94 |
| IPI00470535 | Dihydropyridine receptor alpha 2 subunit | K.M*KDSETLKPDNFEESGYTFIAPR.D   | 3 | 6.41 | 0.55 | -3.28 |
| IPI00470535 | Dihydropyridine receptor alpha 2 subunit | K.M*KDSETLKPDNFEESGYTFIAPR.D   | 4 | 2.82 | 0.14 | -1.10 |
| IPI00470535 | Dihydropyridine receptor alpha 2 subunit | K.M*QEDLVTLAK.T                | 1 | 2.39 | 0.26 | -3.00 |
| IPI00470535 | Dihydropyridine receptor alpha 2 subunit | K.M*QEDLVTLAK.T                | 2 | 3.10 | 0.28 | -3.46 |
| IPI00470535 | Dihydropyridine receptor alpha 2 subunit | K.NQLILGVM*GVDVSLDIKR.L        | 3 | 3.18 | 0.25 | -3.60 |
| IPI00470535 | Dihydropyridine receptor alpha 2 subunit | K.NREEDPSLLWQVFGSATGLAR.Y      | 3 | 2.84 | 0.08 | -3.62 |
| IPI00470535 | Dihydropyridine receptor alpha 2 subunit | K.QSCITEQTQYFFDNDK.S           | 2 | 5.23 | 0.59 | -3.99 |
| IPI00470535 | Dihydropyridine receptor alpha 2 subunit | K.QSCITEQTQYFFDNDK.S           | 3 | 4.39 | 0.44 | -3.25 |
| IPI00470535 | Dihydropyridine receptor alpha 2 subunit | K.SGPGAYESGIM*VSK.A            | 1 | 2.80 | 0.32 | -2.67 |
| IPI00470535 | Dihydropyridine receptor alpha 2 subunit | K.SGPGAYESGIM*VSK.A            | 2 | 4.19 | 0.45 | -4.20 |
| IPI00470535 | Dihydropyridine receptor alpha 2 subunit | K.SQEPVTLDFLDAELENLIK.V        | 2 | 5.56 | 0.60 | -4.40 |
| IPI00470535 | Dihydropyridine receptor alpha 2 subunit | K.SQEPVTLDFLDAELENLIK.V        | 3 | 4.24 | 0.28 | -2.98 |
| IPI00470535 | Dihydropyridine receptor alpha 2 subunit | K.SQEPVTLDFLDAELENLIKVEIR.N    | 3 | 3.06 | 0.32 | -3.73 |
| IPI00470535 | Dihydropyridine receptor alpha 2 subunit | K.SWVDKM*QEDLVTLAK.T           | 2 | 3.71 | 0.31 | -0.76 |
| IPI00470535 | Dihydropyridine receptor alpha 2 subunit | K.SWVDKM*QEDLVTLAK.T           | 3 | 2.30 | 0.07 | -0.69 |
| IPI00470535 | Dihydropyridine receptor alpha 2 subunit | K.SYDYQSVCEPGAAPK.Q            | 2 | 4.48 | 0.48 | -3.96 |
| IPI00470535 | Dihydropyridine receptor alpha 2 subunit | K.TASGVNQLVDIYEK.Y             | 2 | 4.62 | 0.34 | -3.11 |
| IPI00470535 | Dihydropyridine receptor alpha 2 subunit | K.TASGVNQLVDIYEKYQDLYTVEPNAR.Q | 2 | 4.02 | 0.49 | -3.13 |
| IPI00470535 | Dihydropyridine receptor alpha 2 subunit | K.TASGVNQLVDIYEKYQDLYTVEPNAR.Q | 3 | 4.22 | 0.40 | -3.08 |
| IPI00470535 | Dihydropyridine receptor alpha 2 subunit | K.TPNNPSCNADLINR.V             | 2 | 3.34 | 0.33 | 0.06  |
| IPI00470535 | Dihydropyridine receptor alpha 2 subunit | K.YQDLYTVEPNAR.Q               | 2 | 4.32 | 0.45 | -1.74 |
| IPI00470535 | Dihydropyridine receptor alpha 2 subunit | R.AQEIFNK.Y                    | 1 | 2.28 | 0.07 | -1.38 |
| IPI00470535 | Dihydropyridine receptor alpha 2 subunit | R.AQEIFNKYNK.D                 | 1 | 2.91 | 0.11 | -4.04 |
| IPI00470535 | Dihydropyridine receptor alpha 2 subunit | R.AQEIFNKYNK.D                 | 2 | 3.20 | 0.28 | -2.54 |
| IPI00470535 | Dihydropyridine receptor alpha 2 subunit | R.AQEIFNKYNKDK.K               | 2 | 3.92 | 0.22 | -2.57 |
| IPI00470535 | Dihydropyridine receptor alpha 2 subunit | R.DYCNDLK.I                    | 1 | 2.22 | 0.07 | -5.44 |
| IPI00470535 | Dihydropyridine receptor alpha 2 subunit | R.EEDPSLLWQVFGSATGLAR.Y        | 2 | 5.66 | 0.58 | -2.90 |
| IPI00470535 | Dihydropyridine receptor alpha 2 subunit | R.EEDPSLLWQVFGSATGLAR.Y        | 3 | 3.86 | 0.43 | -3.43 |

|             |                                              |                                               |   |      |      |       |
|-------------|----------------------------------------------|-----------------------------------------------|---|------|------|-------|
| IPI00470535 | Dihydropyridine receptor alpha 2 subunit     | R.FFGEIDPSLM*R.H                              | 2 | 3.55 | 0.42 | -3.68 |
| IPI00470535 | Dihydropyridine receptor alpha 2 subunit     | R.FTLCPNGYFAIDPNGYVLLHPNLQPK.P                | 3 | 4.94 | 0.46 | -3.66 |
| IPI00470535 | Dihydropyridine receptor alpha 2 subunit     | R.FVVTDGGITR.V                                | 1 | 1.80 | 0.18 | -3.61 |
| IPI00470535 | Dihydropyridine receptor alpha 2 subunit     | R.FVVTDGGITR.V                                | 2 | 3.50 | 0.31 | -2.43 |
| IPI00470535 | Dihydropyridine receptor alpha 2 subunit     | R.IKPVFIEDANFGR.Q                             | 2 | 3.40 | 0.43 | -2.25 |
| IPI00470535 | Dihydropyridine receptor alpha 2 subunit     | R.IKPVFIEDANFGR.Q                             | 3 | 4.10 | 0.40 | -1.37 |
| IPI00470535 | Dihydropyridine receptor alpha 2 subunit     | R.INTQEYLDVLGRPM*VLADGK.A                     | 2 | 4.03 | 0.34 | -2.31 |
| IPI00470535 | Dihydropyridine receptor alpha 2 subunit     | R.INTQEYLDVLGRPM*VLADGK.A                     | 3 | 3.72 | 0.32 | -2.73 |
| IPI00470535 | Dihydropyridine receptor alpha 2 subunit     | R.INTQEYLDVLGRPM*VLADGKAK.Q                   | 2 | 4.28 | 0.36 | -4.77 |
| IPI00470535 | Dihydropyridine receptor alpha 2 subunit     | R.INTQEYLDVLGRPM*VLADGKAK.Q                   | 3 | 4.34 | 0.35 | -3.70 |
| IPI00470535 | Dihydropyridine receptor alpha 2 subunit     | R.INTQEYLDVLGRPM*VLADGKAK.Q                   | 4 | 4.31 | 0.38 | -3.84 |
| IPI00470535 | Dihydropyridine receptor alpha 2 subunit     | R.LLIQAEQTS DGPNPCDM*VK.Q                     | 2 | 6.47 | 0.52 | -3.72 |
| IPI00470535 | Dihydropyridine receptor alpha 2 subunit     | R.LLIQAEQTS DGPNPCDM*VK.Q                     | 3 | 4.26 | 0.46 | -2.91 |
| IPI00470535 | Dihydropyridine receptor alpha 2 subunit     | R.NSDVM*DCVILDDGGFLLM*ANHDDYTNQIGR.F          | 3 | 5.58 | 0.49 | -3.19 |
| IPI00470535 | Dihydropyridine receptor alpha 2 subunit     | R.QLVEIAAR.D                                  | 1 | 1.78 | 0.05 | -1.76 |
| IPI00470535 | Dihydropyridine receptor alpha 2 subunit     | R.QLVEIAAR.D                                  | 2 | 2.12 | 0.20 | -5.39 |
| IPI00470535 | Dihydropyridine receptor alpha 2 subunit     | R.TPNKIDLYDVR.R                               | 2 | 2.52 | 0.17 | -3.05 |
| IPI00470535 | Dihydropyridine receptor alpha 2 subunit     | R.TPNKIDLYDVR.R                               | 3 | 3.30 | 0.25 | -2.58 |
| IPI00470535 | Dihydropyridine receptor alpha 2 subunit     | R.TPNKIDLYDVR.R                               | 3 | 2.36 | 0.14 | -1.36 |
| IPI00470535 | Dihydropyridine receptor alpha 2 subunit     | R.TSVSEM*LETLSDDDFVNVASFNSNAQDVSCFQHLVQANVR.N | 3 | 5.56 | 0.61 | -3.16 |
| IPI00470535 | Dihydropyridine receptor alpha 2 subunit     | R.TSVSEM*LETLSDDDFVNVASFNSNAQDVSCFQHLVQANVR.N | 4 | 5.00 | 0.39 | -3.25 |
| IPI00470535 | Dihydropyridine receptor alpha 2 subunit     | R.VFTFSVGQHNYDR.G                             | 2 | 4.06 | 0.37 | -2.31 |
| IPI00470535 | Dihydropyridine receptor alpha 2 subunit     | R.VLLDAGFTNELVQNYWSK.Q                        | 2 | 5.45 | 0.55 | -5.18 |
| IPI00470535 | Dihydropyridine receptor alpha 2 subunit     | R.VLLDAGFTNELVQNYWSK.Q                        | 3 | 5.38 | 0.48 | -4.49 |
| IPI00470535 | Dihydropyridine receptor alpha 2 subunit     | W.QVFGSATGLAR.Y                               | 2 | 2.91 | 0.25 | -1.24 |
| IPI00470535 | Dihydropyridine receptor alpha 2 subunit     | W.YIQGAASPK.D                                 | 1 | 2.71 | 0.28 | -4.97 |
| IPI00470535 | Dihydropyridine receptor alpha 2 subunit     | W.YIQGAASPK.D                                 | 2 | 2.90 | 0.19 | -2.89 |
| IPI00470607 | family with sequence similarity 20, member C | H.IALDLLPR.L                                  | 2 | 3.19 | 0.24 | -2.63 |
| IPI00470607 | family with sequence similarity 20, member C | K.LIM*TFQNYGQALFKPM*K.Q                       | 3 | 2.58 | 0.18 | -3.60 |
| IPI00470607 | family with sequence similarity 20, member C | K.LPPAAEPAER.A                                | 2 | 1.64 | 0.09 | -1.66 |
| IPI00470607 | family with sequence similarity 20, member C | K.LSLLM*AESLR.G                               | 2 | 3.00 | 0.21 | -1.58 |
| IPI00470607 | family with sequence similarity 20, member C | R.GDQVAPVLYQPHLEALDRR.L                       | 4 | 2.51 | 0.29 | -2.39 |
| IPI00470607 | family with sequence similarity 20, member C | R.HNPAIEALLHDLSSQR.I                          | 3 | 3.20 | 0.32 | -3.22 |
| IPI00470607 | family with sequence similarity 20, member C | R.LFEHPLYR.V                                  | 2 | 2.57 | 0.09 | -0.78 |
| IPI00470607 | family with sequence similarity 20, member C | R.RSESPPGPGGDASLLAR.L                         | 2 | 4.10 | 0.39 | -3.58 |
| IPI00470607 | family with sequence similarity 20, member C | R.RSESPPGPGGDASLLAR.L                         | 3 | 4.43 | 0.46 | -2.91 |
| IPI00470607 | family with sequence similarity 20, member C | R.VAVPPLTEEDVLFVNSDTR.L                       | 2 | 5.42 | 0.56 | -4.83 |
| IPI00470607 | family with sequence similarity 20, member C | R.VAVPPLTEEDVLFVNSDTR.L                       | 3 | 4.15 | 0.41 | -3.79 |
| IPI00470625 | Neuritin precursor                           | K.GFSDCLK.L                                   | 2 | 2.60 | 0.22 | -2.45 |
| IPI00470625 | Neuritin precursor                           | K.LGDSM*ANYPQGLDDK.T                          | 2 | 4.34 | 0.49 | -5.79 |
| IPI00470625 | Neuritin precursor                           | K.LGDSM*ANYPQGLDDKTNIK.T                      | 2 | 4.34 | 0.49 | -3.00 |
| IPI00470625 | Neuritin precursor                           | K.LGDSM*ANYPQGLDDKTNIK.T                      | 3 | 4.69 | 0.46 | -3.10 |

|             |                                                                                  |                                  |   |      |      |       |
|-------------|----------------------------------------------------------------------------------|----------------------------------|---|------|------|-------|
| IPI00470766 | Isoform 1 of Olfactomedin-like protein 2B precursor                              | K.LSTIIDM*LEGAFYGLDLLK.L         | 2 | 4.15 | 0.44 | -3.81 |
| IPI00470805 | Isoform 2 of Mediator of DNA damage checkpoint protein 1                         | R.ENLTDLVVDTDTLGESTQPQR.E        | 2 | 2.62 | 0.05 | 0.81  |
| IPI00470838 | Isoform 1 of DENN domain-containing protein 2C                                   | R.SLGSKM*KFLQK.K                 | 2 | 3.06 | 0.09 |       |
| IPI00470913 | RANBP2-like and GRIP domain containing 1                                         | R.SKAYGERYLASVQGSAPSPGKK.L       | 3 | 2.50 | 0.16 |       |
| IPI00472249 | protein tyrosine phosphatase, receptor type, N polypeptide 2 isoform 2 precursor | A.LGESGEQADGPK.A                 | 2 | 2.93 | 0.30 | -2.44 |
| IPI00472249 | protein tyrosine phosphatase, receptor type, N polypeptide 2 isoform 2 precursor | K.ATLRGDSFPDDGVQDDDRLYQEVHR.L    | 4 | 3.06 | 0.30 | -3.35 |
| IPI00472249 | protein tyrosine phosphatase, receptor type, N polypeptide 2 isoform 2 precursor | K.DLLGQQPHSEPGA.A                | 2 | 2.97 | 0.27 | -2.97 |
| IPI00472249 | protein tyrosine phosphatase, receptor type, N polypeptide 2 isoform 2 precursor | K.DLLGQQPHSEPGAAAFGE.L           | 2 | 3.89 | 0.49 | -3.49 |
| IPI00472249 | protein tyrosine phosphatase, receptor type, N polypeptide 2 isoform 2 precursor | K.DLLGQQPHSEPGAAAFGELQNM*PGPSK.E | 3 | 4.23 | 0.43 | -2.51 |
| IPI00472249 | protein tyrosine phosphatase, receptor type, N polypeptide 2 isoform 2 precursor | K.KSEHPESLSSEEETAGVENVK.S        | 2 | 6.69 | 0.68 | -3.46 |
| IPI00472249 | protein tyrosine phosphatase, receptor type, N polypeptide 2 isoform 2 precursor | K.KSEHPESLSSEEETAGVENVK.S        | 3 | 4.15 | 0.35 | -4.02 |
| IPI00472249 | protein tyrosine phosphatase, receptor type, N polypeptide 2 isoform 2 precursor | K.LSGTGFTWQDDYTYQVVM*DQELADLPK.T | 3 | 3.24 | 0.12 | -4.84 |
| IPI00472249 | protein tyrosine phosphatase, receptor type, N polypeptide 2 isoform 2 precursor | K.SEHPESLSSEEETAGVENVK.S         | 2 | 6.53 | 0.66 | -3.40 |
| IPI00472249 | protein tyrosine phosphatase, receptor type, N polypeptide 2 isoform 2 precursor | K.SEHPESLSSEEETAGVENVK.S         | 3 | 2.98 | 0.22 | -1.58 |
| IPI00472249 | protein tyrosine phosphatase, receptor type, N polypeptide 2 isoform 2 precursor | R.AALGESGEQADGPK.A               | 2 | 4.40 | 0.56 | -2.34 |
| IPI00472249 | protein tyrosine phosphatase, receptor type, N polypeptide 2 isoform 2 precursor | R.GDSFPDDGVQDDDRLYQEVHR.L        | 3 | 2.02 | 0.17 | -1.55 |
| IPI00472249 | protein tyrosine phosphatase, receptor type, N polypeptide 2 isoform 2 precursor | R.GYIVTDRDPLRPEEGRR.L            | 2 | 2.46 | 0.08 | -3.20 |
| IPI00472249 | protein tyrosine phosphatase, receptor type, N polypeptide 2 isoform 2 precursor | R.GYIVTDRDPLRPEEGRR.L            | 4 | 2.30 | 0.11 | -1.55 |
| IPI00472249 | protein tyrosine phosphatase, receptor type, N polypeptide 2 isoform 2 precursor | R.HLPFLEALSQAPASDVLAR.T          | 3 | 3.27 | 0.29 | -2.91 |
| IPI00472249 | protein tyrosine phosphatase, receptor type, N polypeptide 2 isoform 2 precursor | R.LLPGALPFARPLDM*ER.K            | 2 | 3.16 | 0.07 |       |
| IPI00472249 | protein tyrosine phosphatase, receptor type, N polypeptide 2 isoform 2 precursor | R.LLQVPSSAFADVEVLGPAVTFK.V       | 2 | 6.27 | 0.55 | -7.01 |
| IPI00472249 | protein tyrosine phosphatase, receptor type, N polypeptide 2 isoform 2 precursor | R.LLQVPSSAFADVEVLGPAVTFK.V       | 3 | 3.18 | 0.19 | -5.16 |



|             |                                                                                  |                                            |   |      |      |       |
|-------------|----------------------------------------------------------------------------------|--------------------------------------------|---|------|------|-------|
| IPI00472249 | protein tyrosine phosphatase, receptor type, N polypeptide 2 isoform 2 precursor | R.LSATLGGLLQDHGS.R                         | 2 | 3.06 | 0.34 | -4.45 |
| IPI00472249 | protein tyrosine phosphatase, receptor type, N polypeptide 2 isoform 2 precursor | R.LSATLGGLLQDHGSR.L                        | 2 | 3.53 | 0.39 | 0.62  |
| IPI00472249 | protein tyrosine phosphatase, receptor type, N polypeptide 2 isoform 2 precursor | R.LVEDVAR.L                                | 2 | 1.90 | 0.17 | -3.61 |
| IPI00472249 | protein tyrosine phosphatase, receptor type, N polypeptide 2 isoform 2 precursor | R.RPEASSPARPSK.H                           | 2 | 1.92 | 0.08 | -3.50 |
| IPI00472249 | protein tyrosine phosphatase, receptor type, N polypeptide 2 isoform 2 precursor | R.RPEASSPARPSK.H                           | 3 | 2.62 | 0.23 | -3.02 |
| IPI00472249 | protein tyrosine phosphatase, receptor type, N polypeptide 2 isoform 2 precursor | R.TLGQLQPDELSPK.V                          | 2 | 3.88 | 0.45 | -5.95 |
| IPI00472249 | protein tyrosine phosphatase, receptor type, N polypeptide 2 isoform 2 precursor | R.YEVSPVALQR.L                             | 1 | 2.04 | 0.32 | -3.89 |
| IPI00472249 | protein tyrosine phosphatase, receptor type, N polypeptide 2 isoform 2 precursor | R.YEVSPVALQR.L                             | 2 | 2.53 | 0.31 | -1.88 |
| IPI00472249 | protein tyrosine phosphatase, receptor type, N polypeptide 2 isoform 2 precursor | S.EHPESLSSEEETAGVENVK.S                    | 2 | 4.76 | 0.57 | -3.43 |
| IPI00472332 | similar to polyhomeotic 1-like isoform 4                                         | K.KM*KEFQEANYAR.V                          | 3 | 2.16 | 0.21 |       |
| IPI00472345 | IGHG3 protein                                                                    | K.ALPAPIEK.T                               | 1 | 1.81 | 0.11 |       |
| IPI00472345 | IGHG3 protein                                                                    | K.CKVSNKALPAPIEK.T                         | 2 | 2.28 | 0.15 |       |
| IPI00472345 | IGHG3 protein                                                                    | K.DTLM*ISR.T                               | 2 | 2.48 | 0.09 | -3.74 |
| IPI00472345 | IGHG3 protein                                                                    | K.DTLMISR.T                                | 1 | 2.38 | 0.13 |       |
| IPI00472345 | IGHG3 protein                                                                    | K.DTLMISR.T                                | 2 | 2.45 | 0.16 |       |
| IPI00472345 | IGHG3 protein                                                                    | K.GFYPSDIAVEWESSGQPENNYNTTPM*LDSGFSFLYSK.L | 3 | 5.59 | 0.44 |       |
| IPI00472345 | IGHG3 protein                                                                    | K.GFYPSDIAVEWESSGQPENNYNTTPMLDSDGFSFLYSK.L | 3 | 3.90 | 0.14 |       |
| IPI00472345 | IGHG3 protein                                                                    | K.GPSVFPLAPCSR.S                           | 1 | 2.54 | 0.34 |       |
| IPI00472345 | IGHG3 protein                                                                    | K.GPSVFPLAPCSR.S                           | 2 | 3.53 | 0.37 |       |
| IPI00472345 | IGHG3 protein                                                                    | K.GQPREPQVYTLPPSR.E                        | 2 | 2.89 | 0.13 |       |
| IPI00472345 | IGHG3 protein                                                                    | K.GQPREPQVYTLPPSR.E                        | 3 | 2.92 | 0.17 |       |
| IPI00472345 | IGHG3 protein                                                                    | K.GQPREPQVYTLPPSREEM*TK.N                  | 3 | 3.87 | 0.30 |       |
| IPI00472345 | IGHG3 protein                                                                    | K.GQPREPQVYTLPPSREEM*TKNQVSLTCLVK.G        | 3 | 3.18 | 0.26 |       |
| IPI00472345 | IGHG3 protein                                                                    | K.GQPREPQVYTLPPSREEMTK.N                   | 3 | 3.97 | 0.17 |       |
| IPI00472345 | IGHG3 protein                                                                    | K.NQVSLTCLVK.G                             | 1 | 2.26 | 0.22 |       |
| IPI00472345 | IGHG3 protein                                                                    | K.NQVSLTCLVK.G                             | 2 | 2.44 | 0.28 | -2.15 |
| IPI00472345 | IGHG3 protein                                                                    | K.SCDTPPPCPR.C                             | 2 | 3.01 | 0.17 |       |
| IPI00472345 | IGHG3 protein                                                                    | K.TKGQPREPQVYTLPPSREEM*TK.N                | 3 | 3.08 | 0.11 |       |
| IPI00472345 | IGHG3 protein                                                                    | K.TPLGDTTHTCPR.C                           | 1 | 2.57 | 0.43 |       |
| IPI00472345 | IGHG3 protein                                                                    | K.TPLGDTTHTCPR.C                           | 2 | 4.10 | 0.40 |       |
| IPI00472345 | IGHG3 protein                                                                    | K.TPLGDTTHTCPR.C                           | 3 | 2.70 | 0.27 |       |
| IPI00472345 | IGHG3 protein                                                                    | K.VSNKALPAPIEK.T                           | 2 | 3.33 | 0.18 |       |
| IPI00472345 | IGHG3 protein                                                                    | K.WYVDGVEVHNAK.T                           | 1 | 2.91 | 0.35 |       |

|             |                                             |                                     |   |      |      |       |
|-------------|---------------------------------------------|-------------------------------------|---|------|------|-------|
| IPI00472345 | IGHG3 protein                               | K.WYVDGVEVHNAK.T                    | 2 | 3.90 | 0.46 |       |
| IPI00472345 | IGHG3 protein                               | K.WYVDGVEVHNAK.T                    | 3 | 2.99 | 0.21 |       |
| IPI00472345 | IGHG3 protein                               | Q.FKWYVDGVEVHNAK.T                  | 1 | 3.71 | 0.30 |       |
| IPI00472345 | IGHG3 protein                               | R.CPAPELLGGPSVFLFPPKPK.D            | 2 | 4.00 | 0.37 |       |
| IPI00472345 | IGHG3 protein                               | R.CPAPELLGGPSVFLFPPKPK.D            | 3 | 6.31 | 0.49 |       |
| IPI00472345 | IGHG3 protein                               | R.CPAPELLGGPSVFLFPPKPKDTLM*ISR.T    | 3 | 3.77 | 0.23 |       |
| IPI00472345 | IGHG3 protein                               | R.EEM*TKNQVSLTCLVK.G                | 2 | 3.75 | 0.32 |       |
| IPI00472345 | IGHG3 protein                               | R.EPQVYTLPPSREEM*TK.N               | 1 | 2.26 | 0.37 |       |
| IPI00472345 | IGHG3 protein                               | R.EPQVYTLPPSREEM*TK.N               | 2 | 4.02 | 0.44 |       |
| IPI00472345 | IGHG3 protein                               | R.EPQVYTLPPSREEM*TKNQVSLTCLVK.G     | 3 | 2.94 | 0.15 |       |
| IPI00472345 | IGHG3 protein                               | R.EPQVYTLPPSREEMTK.N                | 1 | 2.97 | 0.15 |       |
| IPI00472345 | IGHG3 protein                               | R.EPQVYTLPPSREEMTK.N                | 2 | 3.92 | 0.38 |       |
| IPI00472345 | IGHG3 protein                               | R.EPQVYTLPPSREEMTKNQVSLTCLVK.G      | 3 | 3.59 | 0.25 |       |
| IPI00472345 | IGHG3 protein                               | R.STSGGTAALGCLVK.D                  | 1 | 2.45 | 0.34 |       |
| IPI00472345 | IGHG3 protein                               | R.STSGGTAALGCLVK.D                  | 2 | 4.37 | 0.45 |       |
| IPI00472345 | IGHG3 protein                               | R.TPEVTCVVVDVSHED.P                 | 2 | 5.50 | 0.52 |       |
| IPI00472345 | IGHG3 protein                               | R.TPEVTCVVVDVSHEDPEVQFK.W           | 2 | 5.17 | 0.45 |       |
| IPI00472345 | IGHG3 protein                               | R.TPEVTCVVVDVSHEDPEVQFK.W           | 3 | 5.15 | 0.45 |       |
| IPI00472345 | IGHG3 protein                               | R.VELKTPLGDTTHTCPR.C                | 3 | 4.04 | 0.23 |       |
| IPI00472345 | IGHG3 protein                               | R.VVSVLTVLHQDWLNGK.E                | 1 | 4.22 | 0.41 |       |
| IPI00472345 | IGHG3 protein                               | R.VVSVLTVLHQDWLNGK.E                | 2 | 5.39 | 0.46 |       |
| IPI00472345 | IGHG3 protein                               | R.VVSVLTVLHQDWLNGK.E                | 3 | 3.42 | 0.38 |       |
| IPI00472345 | IGHG3 protein                               | R.VVSVLTVLHQDWLNGKEYK.C             | 2 | 5.56 | 0.40 |       |
| IPI00472345 | IGHG3 protein                               | R.VVSVLTVLHQDWLNGKEYK.C             | 3 | 4.97 | 0.40 |       |
| IPI00472345 | IGHG3 protein                               | R.WQQGNIFSCSV*HEALHNR.F             | 2 | 4.65 | 0.34 |       |
| IPI00472345 | IGHG3 protein                               | R.WQQGNIFSCSV*HEALHNR.F             | 3 | 3.11 | 0.22 |       |
| IPI00472754 | Polycystic kidney disease 1-related protein | K.VVEM*QGV.R                        | 2 | 2.72 | 0.17 | -3.50 |
| IPI00472754 | Polycystic kidney disease 1-related protein | R.AALRPAVSSDQQLIR.K                 | 2 | 3.36 | 0.42 |       |
| IPI00472754 | Polycystic kidney disease 1-related protein | R.THSSNSM*LVFLK.K                   | 2 | 2.45 | 0.26 |       |
| IPI00472961 | IGKC protein                                | K.ADYEKHKVYACEVTHQGLSSPVTK.S        | 3 | 6.20 | 0.45 |       |
| IPI00472961 | IGKC protein                                | K.DSTYLSSTLTLSK.A                   | 1 | 3.19 | 0.31 |       |
| IPI00472961 | IGKC protein                                | K.DSTYLSSTLTLSK.A                   | 2 | 2.59 | 0.17 | -2.80 |
| IPI00472961 | IGKC protein                                | K.DSTYLSSTLTLSK.A                   | 3 | 3.23 | 0.27 |       |
| IPI00472961 | IGKC protein                                | K.HKVYACEVTHQGLSSPVTK.S             | 3 | 4.56 | 0.36 |       |
| IPI00472961 | IGKC protein                                | K.RTVAAPSVFIFPPSDEQLK.S             | 2 | 5.74 | 0.42 |       |
| IPI00472961 | IGKC protein                                | K.RTVAAPSVFIFPPSDEQLK.S             | 3 | 4.14 | 0.22 |       |
| IPI00472961 | IGKC protein                                | K.SGTASVVCLLNNFYPR.E                | 1 | 4.08 | 0.39 |       |
| IPI00472961 | IGKC protein                                | K.SGTASVVCLLNNFYPR.E                | 2 | 3.05 | 0.36 | -5.56 |
| IPI00472961 | IGKC protein                                | K.SGTASVVCLLNNFYPR.E                | 3 | 4.63 | 0.31 |       |
| IPI00472961 | IGKC protein                                | K.VDNALQSGNSQESVTEQDSK.D            | 2 | 5.40 | 0.58 | -3.51 |
| IPI00472961 | IGKC protein                                | K.VDNALQSGNSQESVTEQDSK.D            | 3 | 4.56 | 0.42 | -2.63 |
| IPI00472961 | IGKC protein                                | K.VDNALQSGNSQESVTEQDSKDYSLSTLTLSK.A | 2 | 3.56 | 0.49 |       |

|             |                                                    |                                            |   |      |      |       |
|-------------|----------------------------------------------------|--------------------------------------------|---|------|------|-------|
| IPI00472961 | IGKC protein                                       | K.VDNALQSGNSQESVTEQDSKDSTYLSSTLTLSK.A      | 3 | 6.26 | 0.51 |       |
| IPI00472961 | IGKC protein                                       | K.VDNALQSGNSQESVTEQDSKDSTYLSSTLTLSKADYEK.H | 3 | 4.65 | 0.36 |       |
| IPI00472961 | IGKC protein                                       | K.VQWKVDNALQSGNSQESVTEQDSK.D               | 2 | 5.17 | 0.41 |       |
| IPI00472961 | IGKC protein                                       | K.VQWKVDNALQSGNSQESVTEQDSK.D               | 3 | 6.42 | 0.38 |       |
| IPI00472961 | IGKC protein                                       | K.VQWKVDNALQSGNSQESVTEQDSKDSTYLSSTLTLSK.A  | 3 | 5.65 | 0.43 |       |
| IPI00472961 | IGKC protein                                       | K.VYACEVTHQGLSSPVTK.S                      | 1 | 4.33 | 0.48 |       |
| IPI00472961 | IGKC protein                                       | K.VYACEVTHQGLSSPVTK.S                      | 2 | 5.40 | 0.48 |       |
| IPI00472961 | IGKC protein                                       | K.VYACEVTHQGLSSPVTK.S                      | 3 | 4.16 | 0.44 |       |
| IPI00472961 | IGKC protein                                       | Q.SGNSQESVTEQDSKDSTYLSSTLTLSK.A            | 3 | 6.25 | 0.52 |       |
| IPI00472961 | IGKC protein                                       | R.TVAAPSVF.-                               | 1 | 1.75 | 0.12 |       |
| IPI00472961 | IGKC protein                                       | R.TVAAPSVFIFPPSDEQLK.S                     | 1 | 3.65 | 0.48 |       |
| IPI00472961 | IGKC protein                                       | R.TVAAPSVFIFPPSDEQLK.S                     | 2 | 4.89 | 0.48 |       |
| IPI00472961 | IGKC protein                                       | R.TVAAPSVFIFPPSDEQLK.S                     | 3 | 4.07 | 0.25 |       |
| IPI00472961 | IGKC protein                                       | R.TVAAPSVFIFPPSDEQLKSGTASVVCLLNNFYPR.E     | 3 | 5.23 | 0.48 |       |
| IPI00472961 | IGKC protein                                       | V.YACEVTHQGLSSPVTK.S                       | 2 | 5.14 | 0.43 |       |
| IPI00473011 | Hemoglobin subunit delta                           | K.GTFSQLSELHCDKLHVDPENFR.L                 | 3 | 3.73 | 0.40 |       |
| IPI00473011 | Hemoglobin subunit delta                           | K.KVLGAFSDGLAHLNLIK.G                      | 2 | 4.26 | 0.50 | -1.25 |
| IPI00473011 | Hemoglobin subunit delta                           | K.KVLGAFSDGLAHLNLIK.G                      | 3 | 3.91 | 0.42 | -1.46 |
| IPI00473011 | Hemoglobin subunit delta                           | K.VLGAFSDGLAHLNLIK.G                       | 2 | 4.35 | 0.34 | -3.24 |
| IPI00473011 | Hemoglobin subunit delta                           | K.VLGAFSDGLAHLNLIK.G                       | 3 | 2.76 | 0.25 | -2.32 |
| IPI00473011 | Hemoglobin subunit delta                           | K.VNVDVAVGGEALGR.L                         | 2 | 4.35 | 0.43 |       |
| IPI00473011 | Hemoglobin subunit delta                           | K.VVAGVANALAHK.Y                           | 2 | 3.48 | 0.45 | -3.17 |
| IPI00473011 | Hemoglobin subunit delta                           | K.VVAGVANALAHKYH.-                         | 2 | 3.72 | 0.44 | -4.65 |
| IPI00473011 | Hemoglobin subunit delta                           | K.VVAGVANALAHKYH.-                         | 3 | 2.08 | 0.15 | -2.19 |
| IPI00473011 | Hemoglobin subunit delta                           | R.FFESFGDLSSPDAVM*GNPK.V                   | 2 | 5.16 | 0.39 |       |
| IPI00473011 | Hemoglobin subunit delta                           | R.FFESFGDLSSPDAVM*GNPK.V                   | 3 | 4.70 | 0.26 |       |
| IPI00473011 | Hemoglobin subunit delta                           | R.LLVVYPWTQR.F                             | 2 | 3.24 | 0.30 | -6.61 |
| IPI00473033 | Isoform 1 of Zinc finger protein 69                | R.THTGEKPYECQCGKAFHSPR.C                   | 3 | 4.15 | 0.09 |       |
| IPI00477361 | 10 kDa protein                                     | -.M*VWNTDLVETLELQNLMLCALQTVNGAEAGKESR.G    | 4 | 2.59 | 0.14 | -7.22 |
| IPI00477468 | RNA polymerase-associated protein CTR9 homolog     | K.RGGGGGRRSKKGGFDEFVNDTDDDLPISKK.K         | 3 | 3.55 | 0.06 |       |
| IPI00477597 | Isoform 1 of Haptoglobin-related protein precursor | K.AVGDKLPECEAVCGKPK.N                      | 2 | 3.99 | 0.29 |       |
| IPI00477597 | Isoform 1 of Haptoglobin-related protein precursor | K.AVGDKLPECEAVCGKPK.N                      | 3 | 5.02 | 0.33 |       |
| IPI00477597 | Isoform 1 of Haptoglobin-related protein precursor | K.DIAPTLTLYVGK.K                           | 1 | 2.75 | 0.25 |       |
| IPI00477597 | Isoform 1 of Haptoglobin-related protein precursor | K.DIAPTLTLYVGK.K                           | 2 | 3.34 | 0.27 |       |
| IPI00477597 | Isoform 1 of Haptoglobin-related protein precursor | K.DIAPTLTLYVGKK.Q                          | 1 | 3.09 | 0.15 |       |
| IPI00477597 | Isoform 1 of Haptoglobin-related protein precursor | K.DIAPTLTLYVGKK.Q                          | 2 | 3.14 | 0.25 |       |
| IPI00477597 | Isoform 1 of Haptoglobin-related protein precursor | K.GSFPWQAK.M                               | 2 | 2.33 | 0.20 |       |
| IPI00477597 | Isoform 1 of Haptoglobin-related protein precursor | K.NPANPVQR.I                               | 1 | 1.95 | 0.19 |       |
| IPI00477597 | Isoform 1 of Haptoglobin-related protein precursor | K.NPANPVQR.I                               | 2 | 2.35 | 0.20 |       |
| IPI00477597 | Isoform 1 of Haptoglobin-related protein precursor | K.SCAVAEYGVYVK.V                           | 1 | 3.23 | 0.46 |       |
| IPI00477597 | Isoform 1 of Haptoglobin-related protein precursor | K.SCAVAEYGVYVK.V                           | 2 | 3.14 | 0.38 | 0.93  |

|             |                                                        |                                                |   |      |      |       |
|-------------|--------------------------------------------------------|------------------------------------------------|---|------|------|-------|
| IPI00477597 | Isoform 1 of Haptoglobin-related protein precursor     | K.SPVGVPILNEHTFCVGM*SK.Y                       | 2 | 4.84 | 0.39 |       |
| IPI00477597 | Isoform 1 of Haptoglobin-related protein precursor     | K.SPVGVPILNEHTFCVGM*SK.Y                       | 3 | 4.25 | 0.30 |       |
| IPI00477597 | Isoform 1 of Haptoglobin-related protein precursor     | K.SPVGVPILNEHTFCVGM*SK.Y                       | 3 | 4.34 | 0.25 |       |
| IPI00477597 | Isoform 1 of Haptoglobin-related protein precursor     | K.VTSIQDWWVQK.T                                | 1 | 2.31 | 0.28 |       |
| IPI00477597 | Isoform 1 of Haptoglobin-related protein precursor     | K.VTSIQDWWVQK.T                                | 2 | 3.28 | 0.26 |       |
| IPI00477597 | Isoform 1 of Haptoglobin-related protein precursor     | K.VTSIQDWWVQK.TIAEN.-                          | 2 | 3.93 | 0.14 |       |
| IPI00477597 | Isoform 1 of Haptoglobin-related protein precursor     | K.VVLHPNYHQVDIGLIK.L                           | 3 | 2.81 | 0.27 |       |
| IPI00477597 | Isoform 1 of Haptoglobin-related protein precursor     | K.YVM*LPVADQYDCIHYEGSTCPK.W                    | 3 | 3.26 | 0.35 |       |
| IPI00477597 | Isoform 1 of Haptoglobin-related protein precursor     | R.ILGGHLDK.G                                   | 2 | 1.68 | 0.18 | -4.48 |
| IPI00477597 | Isoform 1 of Haptoglobin-related protein precursor     | R.LRTEGDGVYTLNDKK.Q                            | 2 | 4.28 | 0.08 |       |
| IPI00477597 | Isoform 1 of Haptoglobin-related protein precursor     | R.LRTEGDGVYTLNDKKQWINK.A                       | 3 | 6.29 | 0.09 |       |
| IPI00477597 | Isoform 1 of Haptoglobin-related protein precursor     | R.TEGDGVYTLNDK.K                               | 2 | 4.13 | 0.08 |       |
| IPI00477597 | Isoform 1 of Haptoglobin-related protein precursor     | R.TEGDGVYTLNDKK.Q                              | 1 | 3.03 | 0.07 |       |
| IPI00477597 | Isoform 1 of Haptoglobin-related protein precursor     | R.TEGDGVYTLNDKK.Q                              | 2 | 3.03 | 0.11 |       |
| IPI00477597 | Isoform 1 of Haptoglobin-related protein precursor     | R.VGYVSGWGQSDNFK.L                             | 2 | 3.09 | 0.33 |       |
| IPI00477611 | 184 kDa protein                                        | K.DAQLSAPTK.Q                                  | 1 | 1.73 | 0.14 | -2.92 |
| IPI00477611 | 184 kDa protein                                        | K.DAQLSAPTK.Q                                  | 2 | 3.15 | 0.22 | -2.72 |
| IPI00477611 | 184 kDa protein                                        | K.GDDGEPGQTGSPGPTGEPGSPGPPGKRGPPGAPGPEGRQGEK.G | 3 | 2.69 | 0.24 |       |
| IPI00477611 | 184 kDa protein                                        | K.QLYPASAFPEDFSILTIVK.A                        | 2 | 3.59 | 0.35 | -5.46 |
| IPI00477611 | 184 kDa protein                                        | K.QLYPASAFPEDFSILTIVK.A                        | 3 | 3.08 | 0.30 | -4.96 |
| IPI00477611 | 184 kDa protein                                        | R.ILDEEVFEGDIQQLFVSDHR.A                       | 3 | 3.71 | 0.38 | -4.46 |
| IPI00477611 | 184 kDa protein                                        | R.SPFLYEDHTGKPGPEDYPLFR.G                      | 4 | 2.67 | 0.23 | -2.45 |
| IPI00477611 | 184 kDa protein                                        | R.SSKGPDVAYR.V                                 | 2 | 2.90 | 0.17 | -0.60 |
| IPI00477616 | Protein phosphatase 2A activator, regulatory subunit 4 | K.LDEEAENLVATVPTHLAAAVPEVAVYLK.E               | 3 | 3.44 | 0.24 | -4.26 |
| IPI00477714 | V3-4 protein                                           | R.FSGSILGNK.A                                  | 1 | 2.17 | 0.08 |       |
| IPI00477714 | V3-4 protein                                           | R.FSGSILGNK.A                                  | 2 | 2.73 | 0.09 |       |
| IPI00477714 | V3-4 protein                                           | R.SSGVPDRFSGSILGNK.A                           | 2 | 4.20 | 0.24 |       |
| IPI00477714 | V3-4 protein                                           | R.TLIYSTNTR.S                                  | 2 | 2.42 | 0.16 |       |
| IPI00477747 | Isoform 1 of Follistatin-related protein 4 precursor   | K.DCFLKGDCTM*AGYAR.L                           | 3 | 3.24 | 0.28 |       |
| IPI00477747 | Isoform 1 of Follistatin-related protein 4 precursor   | K.NEVGVDEDISSLFIEDSAR.K                        | 2 | 4.71 | 0.46 |       |
| IPI00477747 | Isoform 1 of Follistatin-related protein 4 precursor   | K.NGVDVSTQM*SK.Q                               | 2 | 3.42 | 0.29 |       |
| IPI00477747 | Isoform 1 of Follistatin-related protein 4 precursor   | K.SRPSLQVITEASTGQSQHILIR.T                     | 3 | 6.91 | 0.41 |       |
| IPI00477747 | Isoform 1 of Follistatin-related protein 4 precursor   | K.TLANILWR.E                                   | 2 | 2.99 | 0.14 |       |
| IPI00477747 | Isoform 1 of Follistatin-related protein 4 precursor   | K.VLQSIGVDPLPAK.L                              | 2 | 3.41 | 0.22 |       |
| IPI00477747 | Isoform 1 of Follistatin-related protein 4 precursor   | R.DLDADGNHLSSELAQHVLK.K                        | 3 | 6.08 | 0.46 |       |
| IPI00477747 | Isoform 1 of Follistatin-related protein 4 precursor   | R.DSGLFGQYLLTPAR.E                             | 2 | 3.26 | 0.31 | -4.43 |
| IPI00477747 | Isoform 1 of Follistatin-related protein 4 precursor   | R.FDDYNSDSSLTLR.E                              | 2 | 4.57 | 0.47 |       |
| IPI00477747 | Isoform 1 of Follistatin-related protein 4 precursor   | R.GEIQTLYDLQINSGISDLAFQR.S                     | 3 | 4.20 | 0.31 |       |
| IPI00477747 | Isoform 1 of Follistatin-related protein 4 precursor   | R.GPDVGVGESQAEEPR.S                            | 2 | 3.06 | 0.26 |       |
| IPI00477747 | Isoform 1 of Follistatin-related protein 4 precursor   | R.LKNVLLALQTR.L                                | 2 | 3.01 | 0.15 |       |
| IPI00477747 | Isoform 1 of Follistatin-related protein 4 precursor   | R.NGLTLNFLDLEDINDFGEDDSLYITK.V                 | 3 | 5.23 | 0.38 |       |

|             |                                                           |                                    |   |      |      |       |
|-------------|-----------------------------------------------------------|------------------------------------|---|------|------|-------|
| IPI00477747 | Isoform 1 of Follistatin-related protein 4 precursor      | R.NRYIYVAQPALSR.V                  | 2 | 3.23 | 0.30 |       |
| IPI00477747 | Isoform 1 of Follistatin-related protein 4 precursor      | R.QLLVDSVTDSVLGPNGDVGTGPHTPSPDGR.F | 3 | 6.42 | 0.45 |       |
| IPI00477747 | Isoform 1 of Follistatin-related protein 4 precursor      | R.TPFAGVDDFFIPPTNLIINHIF.F         | 2 | 3.66 | 0.31 |       |
| IPI00477747 | Isoform 1 of Follistatin-related protein 4 precursor      | R.TPFAGVDDFFIPPTNLIINHIF.F         | 3 | 4.27 | 0.42 | -2.65 |
| IPI00477747 | Isoform 1 of Follistatin-related protein 4 precursor      | R.VYPESQAQEPGVAASLR.C              | 2 | 4.18 | 0.46 |       |
| IPI00477747 | Isoform 1 of Follistatin-related protein 4 precursor      | R.YEDTGAYTCIAK.N                   | 2 | 4.05 | 0.39 |       |
| IPI00477747 | Isoform 1 of Follistatin-related protein 4 precursor      | R.YIYVAQPALSR.V                    | 2 | 3.59 | 0.45 |       |
| IPI00477804 | Immunoglobulin heavy chain variable region (Fragment)     | K.NTLYLQM*NSLK.T                   | 2 | 2.43 | 0.12 |       |
| IPI00477804 | Immunoglobulin heavy chain variable region (Fragment)     | K.NTLYLQMNSLK.T                    | 2 | 3.59 | 0.08 |       |
| IPI00477804 | Immunoglobulin heavy chain variable region (Fragment)     | K.SKTDGGTTDYAAPVKGR.F              | 2 | 4.37 | 0.47 |       |
| IPI00477804 | Immunoglobulin heavy chain variable region (Fragment)     | K.SKTDGGTTDYAAPVKGR.F              | 3 | 4.84 | 0.37 |       |
| IPI00477804 | Immunoglobulin heavy chain variable region (Fragment)     | K.TDGGTTDYAAPVKGR.F                | 2 | 4.36 | 0.39 |       |
| IPI00477804 | Immunoglobulin heavy chain variable region (Fragment)     | K.TEDTAVYYCTTR.V                   | 2 | 3.30 | 0.32 |       |
| IPI00477804 | Immunoglobulin heavy chain variable region (Fragment)     | R.DDSKNTLYLQM*NSLK.T               | 2 | 4.53 | 0.27 |       |
| IPI00477804 | Immunoglobulin heavy chain variable region (Fragment)     | R.DDSKNTLYLQM*NSLK.T               | 3 | 3.61 | 0.23 |       |
| IPI00477804 | Immunoglobulin heavy chain variable region (Fragment)     | R.FTISRDDSK.N                      | 2 | 2.52 | 0.15 |       |
| IPI00477804 | Immunoglobulin heavy chain variable region (Fragment)     | R.IKSKTDGGTTDYAAPVK.G              | 3 | 3.34 | 0.24 |       |
| IPI00477868 | LAMA5 protein                                             | R.FGPQTLER.I                       | 2 | 1.56 | 0.07 | 0.83  |
| IPI00477868 | LAMA5 protein                                             | R.TYQPWQFFASSK.R                   | 2 | 2.97 | 0.26 | -1.93 |
| IPI00477992 | complement component 1, q subcomponent, B chain precursor | K.LEQGENVFLQATDK.N                 | 2 | 5.37 | 0.51 | -3.46 |
| IPI00477992 | complement component 1, q subcomponent, B chain precursor | K.VPGLYYFTYHASSR.G                 | 2 | 4.05 | 0.52 | -4.41 |
| IPI00477992 | complement component 1, q subcomponent, B chain precursor | K.VPGLYYFTYHASSR.G                 | 3 | 3.47 | 0.50 | -4.30 |
| IPI00477992 | complement component 1, q subcomponent, B chain precursor | K.VVTFCDYAYNTFQVTTGGM*VLK.L        | 3 | 3.91 | 0.16 |       |
| IPI00477992 | complement component 1, q subcomponent, B chain precursor | K.VVTFCDYAYNTFQVTTGGMVLK.L         | 3 | 3.09 | 0.22 | -4.74 |
| IPI00477992 | complement component 1, q subcomponent, B chain precursor | R.DQTIRFDHVITNM*NNNYEPR.S          | 2 | 1.42 | 0.07 | -3.76 |

|             |                                                           |                                             |   |      |      |       |
|-------------|-----------------------------------------------------------|---------------------------------------------|---|------|------|-------|
| IPI00477992 | complement component 1, q subcomponent, B chain precursor | R.DQTIRFDHVITNM*NNNYEPR.S                   | 3 | 4.00 | 0.35 | -3.39 |
| IPI00477992 | complement component 1, q subcomponent, B chain precursor | R.FDHVITNM*NNNYEPR.S                        | 2 | 4.49 | 0.47 | -1.85 |
| IPI00477992 | complement component 1, q subcomponent, B chain precursor | R.FDHVITNMNNNYEPR.S                         | 2 | 3.78 | 0.12 |       |
| IPI00477992 | complement component 1, q subcomponent, B chain precursor | R.GNLCVNLM*R.G                              | 2 | 2.42 | 0.13 | -1.16 |
| IPI00477992 | complement component 1, q subcomponent, B chain precursor | R.GNLCVNLMR.G                               | 2 | 2.27 | 0.21 |       |
| IPI00478003 | Alpha-2-macroglobulin precursor                           | A.SVSGKPQYM*VLVPSLLHTEETEK.G                | 2 | 5.66 | 0.41 |       |
| IPI00478003 | Alpha-2-macroglobulin precursor                           | F.TDLEAENDVLHCVAFAVPK.S                     | 2 | 5.28 | 0.40 |       |
| IPI00478003 | Alpha-2-macroglobulin precursor                           | K.AAQVTIQSSGTFSSK.F                         | 1 | 3.67 | 0.38 |       |
| IPI00478003 | Alpha-2-macroglobulin precursor                           | K.AAQVTIQSSGTFSSK.F                         | 2 | 5.69 | 0.45 |       |
| IPI00478003 | Alpha-2-macroglobulin precursor                           | K.AGAFCLSEDAGLGISSTASLR.A                   | 2 | 6.45 | 0.50 |       |
| IPI00478003 | Alpha-2-macroglobulin precursor                           | K.AGAFCLSEDAGLGISSTASLR.A                   | 3 | 4.78 | 0.28 |       |
| IPI00478003 | Alpha-2-macroglobulin precursor                           | K.AIGYLNTGYQR.Q                             | 1 | 2.48 | 0.21 |       |
| IPI00478003 | Alpha-2-macroglobulin precursor                           | K.AIGYLNTGYQR.Q                             | 2 | 3.14 | 0.40 | -2.00 |
| IPI00478003 | Alpha-2-macroglobulin precursor                           | K.ALLAYAFALAGNQDK.R                         | 1 | 4.13 | 0.45 |       |
| IPI00478003 | Alpha-2-macroglobulin precursor                           | K.ALLAYAFALAGNQDK.R                         | 2 | 5.18 | 0.37 |       |
| IPI00478003 | Alpha-2-macroglobulin precursor                           | K.ALLAYAFALAGNQDK.R                         | 3 | 4.12 | 0.25 |       |
| IPI00478003 | Alpha-2-macroglobulin precursor                           | K.ALLAYAFALAGNQDKR.K                        | 2 | 4.96 | 0.43 |       |
| IPI00478003 | Alpha-2-macroglobulin precursor                           | K.ATVLNLYPK.C                               | 2 | 3.01 | 0.26 |       |
| IPI00478003 | Alpha-2-macroglobulin precursor                           | K.DLTGFPGPLNDQDDEDCINR.H                    | 2 | 4.29 | 0.36 |       |
| IPI00478003 | Alpha-2-macroglobulin precursor                           | K.DLTGFPGPLNDQDDEDCINR.H                    | 3 | 3.82 | 0.33 |       |
| IPI00478003 | Alpha-2-macroglobulin precursor                           | K.DM*YSFLEDM*GLK.A                          | 2 | 4.47 | 0.29 |       |
| IPI00478003 | Alpha-2-macroglobulin precursor                           | K.DTVIKPLLVEPEGLEK.E                        | 2 | 4.54 | 0.29 |       |
| IPI00478003 | Alpha-2-macroglobulin precursor                           | K.DTVIKPLLVEPEGLEK.E                        | 3 | 4.78 | 0.24 |       |
| IPI00478003 | Alpha-2-macroglobulin precursor                           | K.DTVIKPLLVEPEGLEKETTFFNSLLCPSGGEVSEELSLK.L | 3 | 6.01 | 0.45 |       |
| IPI00478003 | Alpha-2-macroglobulin precursor                           | K.EQAPHICANGR.Q                             | 2 | 2.41 | 0.29 |       |
| IPI00478003 | Alpha-2-macroglobulin precursor                           | K.ETTFNSLLCPSGGEVSEELSLK.L                  | 2 | 4.64 | 0.43 |       |
| IPI00478003 | Alpha-2-macroglobulin precursor                           | K.ETTFNSLLCPSGGEVSEELSLKLPNVVEESAR.A        | 3 | 4.56 | 0.37 |       |
| IPI00478003 | Alpha-2-macroglobulin precursor                           | K.FEVQVTVPK.I                               | 2 | 3.75 | 0.26 |       |
| IPI00478003 | Alpha-2-macroglobulin precursor                           | K.FRVSVM*DENFHPLNELIPLVYIQDPK.G             | 3 | 4.78 | 0.25 |       |
| IPI00478003 | Alpha-2-macroglobulin precursor                           | K.FRVSMDENFHPLNELIPLVYIQDPK.G               | 3 | 5.36 | 0.38 |       |
| IPI00478003 | Alpha-2-macroglobulin precursor                           | K.FSQQLNSHGCFYQQVK.T                        | 2 | 5.16 | 0.40 |       |
| IPI00478003 | Alpha-2-macroglobulin precursor                           | K.FSQQLNSHGCFYQQVK.T                        | 3 | 3.24 | 0.31 |       |
| IPI00478003 | Alpha-2-macroglobulin precursor                           | K.GGVEDEVTL SAYITIALLEIPLTVTHPVVR.N         | 3 | 6.14 | 0.54 |       |
| IPI00478003 | Alpha-2-macroglobulin precursor                           | K.GHFSISIPVK.S                              | 1 | 2.21 | 0.15 |       |
| IPI00478003 | Alpha-2-macroglobulin precursor                           | K.GHFSISIPVK.S                              | 2 | 2.72 | 0.18 |       |
| IPI00478003 | Alpha-2-macroglobulin precursor                           | K.GHFSISIPVKS DIAPVAR.L                     | 2 | 4.95 | 0.45 |       |
| IPI00478003 | Alpha-2-macroglobulin precursor                           | K.GHFSISIPVKS DIAPVAR.L                     | 3 | 4.06 | 0.43 |       |

|             |                                 |                                |   |      |      |       |
|-------------|---------------------------------|--------------------------------|---|------|------|-------|
| IPI00478003 | Alpha-2-macroglobulin precursor | K.GPTQEFKK.R                   | 2 | 2.38 | 0.14 |       |
| IPI00478003 | Alpha-2-macroglobulin precursor | K.GVPIPNKVIFIR.G               | 2 | 2.65 | 0.19 |       |
| IPI00478003 | Alpha-2-macroglobulin precursor | K.GVPIPNKVIFIR.G               | 3 | 2.19 | 0.19 |       |
| IPI00478003 | Alpha-2-macroglobulin precursor | K.HYDGSYSTFGER.Y               | 1 | 3.35 | 0.32 |       |
| IPI00478003 | Alpha-2-macroglobulin precursor | K.HYDGSYSTFGER.Y               | 2 | 3.42 | 0.41 |       |
| IPI00478003 | Alpha-2-macroglobulin precursor | K.KLSFYYLIM*AK.G               | 2 | 3.03 | 0.34 |       |
| IPI00478003 | Alpha-2-macroglobulin precursor | K.KLSFYYLIM*AK.G               | 3 | 3.61 | 0.16 |       |
| IPI00478003 | Alpha-2-macroglobulin precursor | K.LHTEAQIQEEGTVVVELTGR.Q       | 2 | 7.10 | 0.51 |       |
| IPI00478003 | Alpha-2-macroglobulin precursor | K.LHTEAQIQEEGTVVVELTGR.Q       | 3 | 4.51 | 0.44 |       |
| IPI00478003 | Alpha-2-macroglobulin precursor | K.LPPNVVEESAR.A                | 1 | 3.08 | 0.33 |       |
| IPI00478003 | Alpha-2-macroglobulin precursor | K.LPPNVVEESAR.A                | 2 | 3.16 | 0.34 |       |
| IPI00478003 | Alpha-2-macroglobulin precursor | K.LSFVKVDSHFR.Q                | 2 | 3.31 | 0.24 |       |
| IPI00478003 | Alpha-2-macroglobulin precursor | K.LSFVKVDSHFR.Q                | 3 | 2.25 | 0.19 |       |
| IPI00478003 | Alpha-2-macroglobulin precursor | K.LSFYYLIM*AK.G                | 2 | 3.71 | 0.35 |       |
| IPI00478003 | Alpha-2-macroglobulin precursor | K.M*CPQLQQYEM*HGPEGLR.V        | 2 | 4.40 | 0.39 |       |
| IPI00478003 | Alpha-2-macroglobulin precursor | K.M*CPQLQQYEM*HGPEGLR.V        | 3 | 2.49 | 0.26 |       |
| IPI00478003 | Alpha-2-macroglobulin precursor | K.M*CPQLQQYEMHGPEGLR.V         | 2 | 4.71 | 0.44 |       |
| IPI00478003 | Alpha-2-macroglobulin precursor | K.M*VSGFIPLKPTVK.M             | 1 | 2.26 | 0.19 |       |
| IPI00478003 | Alpha-2-macroglobulin precursor | K.M*VSGFIPLKPTVK.M             | 2 | 2.92 | 0.21 | -4.20 |
| IPI00478003 | Alpha-2-macroglobulin precursor | K.MCPQLQQYEM*HGPEGLR.V         | 2 | 4.53 | 0.34 |       |
| IPI00478003 | Alpha-2-macroglobulin precursor | K.MCPQLQQYEMHGPEGLR.V          | 2 | 4.96 | 0.31 |       |
| IPI00478003 | Alpha-2-macroglobulin precursor | K.NEDSLVQVQTDK.S               | 1 | 3.28 | 0.33 |       |
| IPI00478003 | Alpha-2-macroglobulin precursor | K.NEDSLVQVQTDK.S               | 2 | 4.30 | 0.34 |       |
| IPI00478003 | Alpha-2-macroglobulin precursor | K.NEDSLVQVQTDKSIYKPGQTVK.F     | 2 | 3.82 | 0.34 |       |
| IPI00478003 | Alpha-2-macroglobulin precursor | K.NEDSLVQVQTDKSIYKPGQTVK.F     | 3 | 3.59 | 0.18 |       |
| IPI00478003 | Alpha-2-macroglobulin precursor | K.QFSFPLSSEPFQGSYK.V           | 2 | 3.92 | 0.36 |       |
| IPI00478003 | Alpha-2-macroglobulin precursor | K.QQNAQGGFSSTQDTVVALHALSK.Y    | 2 | 4.74 | 0.51 |       |
| IPI00478003 | Alpha-2-macroglobulin precursor | K.QQNAQGGFSSTQDTVVALHALSK.Y    | 3 | 4.24 | 0.51 |       |
| IPI00478003 | Alpha-2-macroglobulin precursor | K.SGGRTEHPFTVEEFVLPK.F         | 2 | 4.33 | 0.30 |       |
| IPI00478003 | Alpha-2-macroglobulin precursor | K.SGGRTEHPFTVEEFVLPK.F         | 3 | 3.18 | 0.21 |       |
| IPI00478003 | Alpha-2-macroglobulin precursor | K.SGGRTEHPFTVEEFVLPKFEVQVTPK.I | 3 | 6.29 | 0.40 |       |
| IPI00478003 | Alpha-2-macroglobulin precursor | K.SKAIGYLNTGYQR.Q              | 2 | 4.21 | 0.39 |       |
| IPI00478003 | Alpha-2-macroglobulin precursor | K.SKAIGYLNTGYQR.Q              | 3 | 3.53 | 0.23 |       |
| IPI00478003 | Alpha-2-macroglobulin precursor | K.SSSNEEVM*FLTQVK.G            | 2 | 4.80 | 0.40 |       |
| IPI00478003 | Alpha-2-macroglobulin precursor | K.SSSNEEVM*FLTQVK.G            | 3 | 3.56 | 0.14 |       |
| IPI00478003 | Alpha-2-macroglobulin precursor | K.SSSNEEVMFLTQVK.G             | 2 | 4.16 | 0.21 |       |
| IPI00478003 | Alpha-2-macroglobulin precursor | K.TAQEGDHGSHVYTK.A             | 2 | 2.98 | 0.34 | -3.21 |
| IPI00478003 | Alpha-2-macroglobulin precursor | K.TAQEGDHGSHVYTK.A             | 3 | 2.72 | 0.23 |       |
| IPI00478003 | Alpha-2-macroglobulin precursor | K.VDLSFSPSQSLPASHAHLR.V        | 2 | 5.14 | 0.40 |       |
| IPI00478003 | Alpha-2-macroglobulin precursor | K.VDLSFSPSQSLPASHAHLR.V        | 3 | 2.58 | 0.19 |       |
| IPI00478003 | Alpha-2-macroglobulin precursor | K.VSNQTLSLFFTVLQDVPVR.D        | 2 | 4.40 | 0.31 |       |
| IPI00478003 | Alpha-2-macroglobulin precursor | K.VSNQTLSLFFTVLQDVPVR.D        | 3 | 4.01 | 0.26 |       |

|             |                                 |                                             |   |      |      |       |
|-------------|---------------------------------|---------------------------------------------|---|------|------|-------|
| IPI00478003 | Alpha-2-macroglobulin precursor | K.VTGEGCVYLQTSLK.Y                          | 2 | 5.11 | 0.43 |       |
| IPI00478003 | Alpha-2-macroglobulin precursor | K.VYDYETDEFIAIEYNAPCSK.D                    | 2 | 5.87 | 0.55 |       |
| IPI00478003 | Alpha-2-macroglobulin precursor | K.VYDYETDEFIAIEYNAPCSK.D                    | 3 | 4.38 | 0.37 |       |
| IPI00478003 | Alpha-2-macroglobulin precursor | K.YDVENCLANK.V                              | 2 | 3.44 | 0.29 |       |
| IPI00478003 | Alpha-2-macroglobulin precursor | K.YDVENCLANKVDLSFSPSQSLPASHAHLR.V           | 3 | 6.51 | 0.46 |       |
| IPI00478003 | Alpha-2-macroglobulin precursor | K.YNILPEKEEFPFALGVQTLPQTCDEPK.A             | 2 | 4.25 | 0.33 |       |
| IPI00478003 | Alpha-2-macroglobulin precursor | K.YNILPEKEEFPFALGVQTLPQTCDEPK.A             | 3 | 5.02 | 0.24 |       |
| IPI00478003 | Alpha-2-macroglobulin precursor | K.YSDASDCHGEDSQAFCEK.F                      | 2 | 5.55 | 0.49 |       |
| IPI00478003 | Alpha-2-macroglobulin precursor | K.YSDASDCHGEDSQAFCEK.F                      | 3 | 4.28 | 0.36 |       |
| IPI00478003 | Alpha-2-macroglobulin precursor | L.FTDLEAENDVLHCVAFAVPK.S                    | 2 | 5.18 | 0.49 |       |
| IPI00478003 | Alpha-2-macroglobulin precursor | R.AFQPFVVELTM*PYSVIR.G                      | 2 | 4.15 | 0.46 | -5.03 |
| IPI00478003 | Alpha-2-macroglobulin precursor | R.AFQPFVVELTM*PYSVIR.G                      | 3 | 4.61 | 0.30 |       |
| IPI00478003 | Alpha-2-macroglobulin precursor | R.AFQPFVVELTM*PYSVIRGEAFTLK.A               | 3 | 2.87 | 0.29 |       |
| IPI00478003 | Alpha-2-macroglobulin precursor | R.AFQPFVVELTMPYSVIR.G                       | 2 | 4.99 | 0.39 |       |
| IPI00478003 | Alpha-2-macroglobulin precursor | R.AFQPFVVELTMPYSVIR.G                       | 3 | 4.07 | 0.18 |       |
| IPI00478003 | Alpha-2-macroglobulin precursor | R.AFQPFVVELTMPYSVIRGEAFTLK.A                | 3 | 2.32 | 0.21 |       |
| IPI00478003 | Alpha-2-macroglobulin precursor | R.HNVYINGITYTPVSSTNEK.D                     | 2 | 6.03 | 0.46 |       |
| IPI00478003 | Alpha-2-macroglobulin precursor | R.HNVYINGITYTPVSSTNEK.D                     | 3 | 3.03 | 0.10 |       |
| IPI00478003 | Alpha-2-macroglobulin precursor | R.HNVYINGITYTPVSSTNEKDM*YSFLEDM*GLK.A       | 3 | 6.06 | 0.41 |       |
| IPI00478003 | Alpha-2-macroglobulin precursor | R.HNVYINGITYTPVSSTNEKDM*YSFLEDMGLK.A        | 3 | 5.52 | 0.16 |       |
| IPI00478003 | Alpha-2-macroglobulin precursor | R.HNVYINGITYTPVSSTNEKDMYSFLEDM*GLK.A        | 3 | 6.05 | 0.26 |       |
| IPI00478003 | Alpha-2-macroglobulin precursor | R.HNVYINGITYTPVSSTNEKDMYSFLEDMGLK.A         | 3 | 5.75 | 0.39 |       |
| IPI00478003 | Alpha-2-macroglobulin precursor | R.IAQWQSFQLEGGLK.Q                          | 1 | 3.54 | 0.32 |       |
| IPI00478003 | Alpha-2-macroglobulin precursor | R.IAQWQSFQLEGGLK.Q                          | 2 | 4.18 | 0.33 |       |
| IPI00478003 | Alpha-2-macroglobulin precursor | R.IAQWQSFQLEGGLK.Q                          | 3 | 4.23 | 0.21 |       |
| IPI00478003 | Alpha-2-macroglobulin precursor | R.IAQWQSFQLEGGLKQFSFPLSSEPFQGSYK.V          | 3 | 6.34 | 0.44 |       |
| IPI00478003 | Alpha-2-macroglobulin precursor | R.KDTVIKPLLVEPEGLEK.E                       | 3 | 3.59 | 0.14 |       |
| IPI00478003 | Alpha-2-macroglobulin precursor | R.KDTVIKPLLVEPEGLEKETTFNSLLCPSGGEVSEELSLK.L | 3 | 6.79 | 0.44 |       |
| IPI00478003 | Alpha-2-macroglobulin precursor | R.KYSDASDCHGEDSQAFCEK.F                     | 2 | 5.25 | 0.49 |       |
| IPI00478003 | Alpha-2-macroglobulin precursor | R.KYSDASDCHGEDSQAFCEK.F                     | 3 | 5.91 | 0.49 |       |
| IPI00478003 | Alpha-2-macroglobulin precursor | R.LLIYAVLPTGDVIGDSAK.Y                      | 2 | 4.71 | 0.38 |       |
| IPI00478003 | Alpha-2-macroglobulin precursor | R.LLIYAVLPTGDVIGDSAK.Y                      | 3 | 2.89 | 0.29 |       |
| IPI00478003 | Alpha-2-macroglobulin precursor | R.LLIYAVLPTGDVIGDSAKYDVENCLANK.V            | 3 | 3.07 | 0.17 |       |
| IPI00478003 | Alpha-2-macroglobulin precursor | R.LLLQQVSLPELPGEYSM*K.V                     | 2 | 4.87 | 0.39 |       |
| IPI00478003 | Alpha-2-macroglobulin precursor | R.LLLQQVSLPELPGEYSM*K.V                     | 3 | 3.20 | 0.17 |       |
| IPI00478003 | Alpha-2-macroglobulin precursor | R.LLLQQVSLPELPGEYSMK.V                      | 2 | 3.82 | 0.38 |       |
| IPI00478003 | Alpha-2-macroglobulin precursor | R.LVDGKGVPIPNKVIFIR.G                       | 2 | 3.44 | 0.26 |       |
| IPI00478003 | Alpha-2-macroglobulin precursor | R.LVDGKGVPIPNKVIFIR.G                       | 3 | 4.88 | 0.36 |       |
| IPI00478003 | Alpha-2-macroglobulin precursor | R.LVHVEEPTHTVIR.K                           | 2 | 3.71 | 0.37 |       |
| IPI00478003 | Alpha-2-macroglobulin precursor | R.LVHVEEPTHTVIR.K                           | 3 | 3.27 | 0.18 |       |
| IPI00478003 | Alpha-2-macroglobulin precursor | R.NALFCLESAWK.T                             | 1 | 2.94 | 0.23 |       |
| IPI00478003 | Alpha-2-macroglobulin precursor | R.NALFCLESAWK.T                             | 2 | 2.95 | 0.34 | -1.74 |



|             |                                 |                                    |   |      |      |       |
|-------------|---------------------------------|------------------------------------|---|------|------|-------|
| IPI00478003 | Alpha-2-macroglobulin precursor | R.NQGNTWLTAFVLK.T                  | 2 | 3.93 | 0.37 | -1.44 |
| IPI00478003 | Alpha-2-macroglobulin precursor | R.QGIPFFGQVR.L                     | 2 | 2.76 | 0.32 |       |
| IPI00478003 | Alpha-2-macroglobulin precursor | R.QLNYKHYDGSYSTFGER.Y              | 2 | 2.72 | 0.21 |       |
| IPI00478003 | Alpha-2-macroglobulin precursor | R.QLNYKHYDGSYSTFGER.Y              | 3 | 3.13 | 0.21 |       |
| IPI00478003 | Alpha-2-macroglobulin precursor | R.QTVSWAVTPK.S                     | 2 | 2.29 | 0.33 |       |
| IPI00478003 | Alpha-2-macroglobulin precursor | R.SASNMAIVDVK.M                    | 2 | 2.82 | 0.15 |       |
| IPI00478003 | Alpha-2-macroglobulin precursor | R.SLFTDLEAENDVLHCVAFAVPK.S         | 2 | 3.84 | 0.40 | -2.25 |
| IPI00478003 | Alpha-2-macroglobulin precursor | R.SLFTDLEAENDVLHCVAFAVPK.S         | 3 | 5.00 | 0.53 | -5.38 |
| IPI00478003 | Alpha-2-macroglobulin precursor | R.SPCYGYQWVSEEHEEAHTAYLVFSPSK.S    | 3 | 7.10 | 0.53 |       |
| IPI00478003 | Alpha-2-macroglobulin precursor | R.SSGSLLNNAIK.G                    | 1 | 2.43 | 0.14 |       |
| IPI00478003 | Alpha-2-macroglobulin precursor | R.SSGSLLNNAIK.G                    | 2 | 3.25 | 0.23 | -1.71 |
| IPI00478003 | Alpha-2-macroglobulin precursor | R.TEHPFTVEEFVLPK.F                 | 1 | 3.45 | 0.29 |       |
| IPI00478003 | Alpha-2-macroglobulin precursor | R.TEHPFTVEEFVLPK.F                 | 2 | 3.99 | 0.40 |       |
| IPI00478003 | Alpha-2-macroglobulin precursor | R.TEHPFTVEEFVLPK.F                 | 3 | 5.03 | 0.14 |       |
| IPI00478003 | Alpha-2-macroglobulin precursor | R.TEHPFTVEEFVLPKFEVQVTPK.I         | 2 | 4.39 | 0.28 |       |
| IPI00478003 | Alpha-2-macroglobulin precursor | R.TEHPFTVEEFVLPKFEVQVTPK.I         | 3 | 3.88 | 0.31 |       |
| IPI00478003 | Alpha-2-macroglobulin precursor | R.TEVSSNHVLIYLDK.V                 | 2 | 4.94 | 0.42 |       |
| IPI00478003 | Alpha-2-macroglobulin precursor | R.TGKAAQVTIQSSGTFSSK.F             | 2 | 4.26 | 0.37 |       |
| IPI00478003 | Alpha-2-macroglobulin precursor | R.TGTHGLLVK.Q                      | 1 | 1.88 | 0.12 |       |
| IPI00478003 | Alpha-2-macroglobulin precursor | R.TGTHGLLVKQEDM*K.G                | 2 | 3.42 | 0.27 |       |
| IPI00478003 | Alpha-2-macroglobulin precursor | R.TTVM*VKNEDSLQVQTDK.S             | 3 | 3.57 | 0.22 |       |
| IPI00478003 | Alpha-2-macroglobulin precursor | R.VGFYESDVM*GR.G                   | 2 | 3.82 | 0.45 |       |
| IPI00478003 | Alpha-2-macroglobulin precursor | R.VGFYESDVMGR.G                    | 2 | 3.27 | 0.42 |       |
| IPI00478003 | Alpha-2-macroglobulin precursor | R.VSVQLEASPAFLAVPVEK.E             | 2 | 5.30 | 0.48 |       |
| IPI00478003 | Alpha-2-macroglobulin precursor | R.VSVQLEASPAFLAVPVEK.E             | 3 | 5.14 | 0.26 |       |
| IPI00478003 | Alpha-2-macroglobulin precursor | R.VSVQLEASPAFLAVPVEKEQAPHCICANGR.Q | 2 | 3.67 | 0.19 |       |
| IPI00478003 | Alpha-2-macroglobulin precursor | R.VSVQLEASPAFLAVPVEKEQAPHCICANGR.Q | 3 | 4.61 | 0.23 |       |
| IPI00478003 | Alpha-2-macroglobulin precursor | R.VTAAPQSVCALR.A                   | 1 | 2.76 | 0.25 |       |
| IPI00478003 | Alpha-2-macroglobulin precursor | R.VTAAPQSVCALR.A                   | 2 | 2.94 | 0.35 | -1.19 |
| IPI00478003 | Alpha-2-macroglobulin precursor | R.VVSM*DENFHPLNELIPLVYIQDPK.G      | 2 | 3.68 | 0.34 |       |
| IPI00478003 | Alpha-2-macroglobulin precursor | R.VVSM*DENFHPLNELIPLVYIQDPK.G      | 3 | 4.08 | 0.20 | -3.73 |
| IPI00478003 | Alpha-2-macroglobulin precursor | R.YGAATFTR.T                       | 1 | 2.12 | 0.22 |       |
| IPI00478003 | Alpha-2-macroglobulin precursor | R.YGAATFTR.T                       | 2 | 2.41 | 0.20 | 1.23  |
| IPI00478124 | 61 kDa protein                  | K.IFLLSLLM*AEMGVHVSVAFAFPRVR.I     | 3 | 2.46 | 0.12 | 0.71  |
| IPI00478414 | Ventropin (Fragment)            | K.IFTEGEAQISQM*CSSR.V              | 2 | 5.08 | 0.40 |       |
| IPI00478414 | Ventropin (Fragment)            | K.LTCAFPVSVPDSCCR.V                | 2 | 3.43 | 0.32 |       |
| IPI00478414 | Ventropin (Fragment)            | R.CPEDSLPPVNNKVTSK.S               | 3 | 3.24 | 0.19 |       |
| IPI00478483 | 172 kDa protein                 | K.AYEITYVR.L                       | 2 | 2.77 | 0.29 | -2.45 |
| IPI00478483 | 172 kDa protein                 | R.AALTQASSSVQAATVTVM*GAR.T         | 3 | 4.44 | 0.41 | -3.18 |
| IPI00478483 | 172 kDa protein                 | R.FHLQETSEDVAPPLPPHFQR.L           | 3 | 3.11 | 0.23 | -4.95 |
| IPI00478483 | 172 kDa protein                 | R.ISLEKDIETLSELLAR.L               | 2 | 3.38 | 0.32 | -2.57 |
| IPI00478483 | 172 kDa protein                 | R.ISLEKDIETLSELLAR.L               | 3 | 4.40 | 0.25 | -2.51 |

|             |                                             |                                        |   |      |      |       |
|-------------|---------------------------------------------|----------------------------------------|---|------|------|-------|
| IPI00478483 | 172 kDa protein                             | R.LEGTGLALSLR.H                        | 2 | 2.52 | 0.17 | -2.11 |
| IPI00478483 | 172 kDa protein                             | R.M*LGNAAPLSSSAK.K                     | 2 | 3.44 | 0.27 | -0.75 |
| IPI00478483 | 172 kDa protein                             | X.TLQTAQAQTLR.Q                        | 2 | 3.26 | 0.20 | -2.32 |
| IPI00478521 | Isoform 1 of UPF0475 protein                | K.QLMTNLSHKDVNFSEEEFQKHEGM*SERERQVMK.K | 4 | 3.75 | 0.17 | -5.18 |
| IPI00478640 | Isoform 1 of Transmembrane protein C17orf87 | -.MDTFTVQDSTAM*SWWR.N                  | 2 | 1.33 | 0.09 | -0.59 |
| IPI00478809 | Coagulation factor V precursor              | E.KPQSTISGLLGPTLYAEVGDIIK.V            | 3 | 4.33 | 0.43 | -3.07 |
| IPI00478809 | Coagulation factor V precursor              | K.ADKPLSIHPQGIR.Y                      | 2 | 3.17 | 0.38 | -3.88 |
| IPI00478809 | Coagulation factor V precursor              | K.DGTDYIEIIPK.E                        | 2 | 3.85 | 0.26 | -3.90 |
| IPI00478809 | Coagulation factor V precursor              | K.DSNM*PVDM*R.E                        | 2 | 2.65 | 0.34 | -2.78 |
| IPI00478809 | Coagulation factor V precursor              | K.EDGILGPIIR.A                         | 2 | 2.52 | 0.18 | -1.62 |
| IPI00478809 | Coagulation factor V precursor              | K.EFNPLVIVGLSK.D                       | 1 | 3.26 | 0.34 | -3.86 |
| IPI00478809 | Coagulation factor V precursor              | K.EFNPLVIVGLSK.D                       | 2 | 3.89 | 0.36 | -3.76 |
| IPI00478809 | Coagulation factor V precursor              | K.EKPQSTISGLLGPTLYAEVGDIIK.V           | 2 | 4.36 | 0.42 | -2.69 |
| IPI00478809 | Coagulation factor V precursor              | K.EKPQSTISGLLGPTLYAEVGDIIK.V           | 3 | 6.54 | 0.53 | -6.08 |
| IPI00478809 | Coagulation factor V precursor              | K.EVIITGIQTQGAK.H                      | 2 | 4.49 | 0.43 | -2.76 |
| IPI00478809 | Coagulation factor V precursor              | K.FTVNNLAEPQK.A                        | 2 | 2.92 | 0.27 | -2.52 |
| IPI00478809 | Coagulation factor V precursor              | K.HTVNPNM*KEDGILGPIIR.A                | 2 | 4.06 | 0.29 |       |
| IPI00478809 | Coagulation factor V precursor              | K.IVYREYEPYFK.K                        | 3 | 2.11 | 0.18 | -1.71 |
| IPI00478809 | Coagulation factor V precursor              | K.IVYREYEPYFKK.E                       | 2 | 2.64 | 0.07 | -3.70 |
| IPI00478809 | Coagulation factor V precursor              | K.IVYREYEPYFKK.E                       | 3 | 2.64 | 0.22 | -2.88 |
| IPI00478809 | Coagulation factor V precursor              | K.KVM*YTQYEDESFTK.H                    | 3 | 2.65 | 0.09 | 0.54  |
| IPI00478809 | Coagulation factor V precursor              | K.LSEGASYLDHTFPAEK.M                   | 2 | 4.97 | 0.44 | -2.23 |
| IPI00478809 | Coagulation factor V precursor              | K.LSEGASYLDHTFPAEK.M                   | 3 | 2.95 | 0.22 | -2.01 |
| IPI00478809 | Coagulation factor V precursor              | K.LSEGASYLDHTFPAEKM*DDAVAPGR.E         | 3 | 4.62 | 0.43 | -3.37 |
| IPI00478809 | Coagulation factor V precursor              | K.LSEGASYLDHTFPAEKM*DDAVAPGR.E         | 4 | 2.89 | 0.22 | 1.98  |
| IPI00478809 | Coagulation factor V precursor              | K.M*DDAVAPGR.E                         | 2 | 2.33 | 0.07 | -2.99 |
| IPI00478809 | Coagulation factor V precursor              | K.M*YEQEWVR.L                          | 2 | 3.01 | 0.16 | -1.83 |
| IPI00478809 | Coagulation factor V precursor              | K.NFFNPPIISR.F                         | 2 | 2.65 | 0.18 | -2.48 |
| IPI00478809 | Coagulation factor V precursor              | K.NKADKPLSIHPQGIR.Y                    | 4 | 1.92 | 0.17 | -4.31 |
| IPI00478809 | Coagulation factor V precursor              | K.QITASSFKK.S                          | 1 | 2.20 | 0.07 | -4.66 |
| IPI00478809 | Coagulation factor V precursor              | K.RDPRGEYEEHLGILGPIIR.A                | 3 | 3.09 | 0.27 | -2.50 |
| IPI00478809 | Coagulation factor V precursor              | K.SSM*VDKIFEGTNTK.G                    | 2 | 3.25 | 0.34 | -2.02 |
| IPI00478809 | Coagulation factor V precursor              | K.SSM*VDKIFEGTNTK.G                    | 3 | 2.58 | 0.14 | 2.92  |
| IPI00478809 | Coagulation factor V precursor              | K.TFDKQIVLLFAVFDESK.S                  | 3 | 3.63 | 0.42 | -3.04 |
| IPI00478809 | Coagulation factor V precursor              | K.WIISLTPK.H                           | 2 | 2.61 | 0.17 | -0.71 |
| IPI00478809 | Coagulation factor V precursor              | K.WNILEFDEPTENDAQLTRPYSDVDIM*R.D       | 3 | 5.83 | 0.55 | -2.71 |
| IPI00478809 | Coagulation factor V precursor              | K.YLDSTFTK.R                           | 2 | 2.63 | 0.26 | -2.12 |
| IPI00478809 | Coagulation factor V precursor              | R.AADIEQQAVFAVFDENK.S                  | 2 | 5.60 | 0.55 | -5.68 |
| IPI00478809 | Coagulation factor V precursor              | R.AADIEQQAVFAVFDENK.S                  | 3 | 4.83 | 0.43 | -4.21 |
| IPI00478809 | Coagulation factor V precursor              | R.AEVDDVIQVR.F                         | 2 | 3.91 | 0.28 | -3.05 |
| IPI00478809 | Coagulation factor V precursor              | R.AGM*QTPFLIM*DR.D                     | 2 | 3.53 | 0.27 | -2.22 |
| IPI00478809 | Coagulation factor V precursor              | R.AVQPGETYTYK.W                        | 1 | 2.21 | 0.13 | -1.77 |

|             |                                                                          |                                 |   |      |      |       |
|-------------|--------------------------------------------------------------------------|---------------------------------|---|------|------|-------|
| IPI00478809 | Coagulation factor V precursor                                           | R.AVQPGETYTYK.W                 | 2 | 2.98 | 0.41 | -2.27 |
| IPI00478809 | Coagulation factor V precursor                                           | R.AWAYYSAVNPEKDIHSLIGPLLICQK.G  | 4 | 2.98 | 0.21 | -2.70 |
| IPI00478809 | Coagulation factor V precursor                                           | R.DIASGLIGLLLICK.S              | 2 | 4.20 | 0.38 | -3.49 |
| IPI00478809 | Coagulation factor V precursor                                           | R.DIASGLIGLLLICK.S              | 3 | 3.81 | 0.31 | -1.62 |
| IPI00478809 | Coagulation factor V precursor                                           | R.ETDIEDSDDIPEDTTYK.K           | 2 | 5.42 | 0.55 | -4.58 |
| IPI00478809 | Coagulation factor V precursor                                           | R.GEYEEHLGILGPIIR.A             | 2 | 3.68 | 0.42 | -0.73 |
| IPI00478809 | Coagulation factor V precursor                                           | R.GEYEEHLGILGPIIR.A             | 3 | 3.54 | 0.30 | -0.99 |
| IPI00478809 | Coagulation factor V precursor                                           | R.KM*HDRLEPEDEESDADYDYQNR.L     | 4 | 2.71 | 0.16 | -1.19 |
| IPI00478809 | Coagulation factor V precursor                                           | R.KYLDSTFTK.R                   | 2 | 2.52 | 0.08 | -2.63 |
| IPI00478809 | Coagulation factor V precursor                                           | R.LLSLGAGEFK.S                  | 1 | 1.92 | 0.16 | -2.71 |
| IPI00478809 | Coagulation factor V precursor                                           | R.LLSLGAGEFK.S                  | 2 | 2.17 | 0.11 | -2.75 |
| IPI00478809 | Coagulation factor V precursor                                           | R.LNNGGSYNAWSVEK.L              | 2 | 4.53 | 0.48 | -1.79 |
| IPI00478809 | Coagulation factor V precursor                                           | R.M*PM*GLSTGIISDSQIK.A          | 2 | 4.40 | 0.39 | -2.90 |
| IPI00478809 | Coagulation factor V precursor                                           | R.M*PM*GLSTGIISDSQIK.A          | 3 | 2.94 | 0.10 | -2.19 |
| IPI00478809 | Coagulation factor V precursor                                           | R.NVM*YFNGNSDASTIKENQFDPPIVAR.Y | 3 | 4.78 | 0.49 | -4.30 |
| IPI00478809 | Coagulation factor V precursor                                           | R.NVMYFNGNSDASTIKENQFDPPIVAR.Y  | 3 | 4.20 | 0.31 |       |
| IPI00478809 | Coagulation factor V precursor                                           | R.SEAYNTFSE.R                   | 1 | 2.07 | 0.25 | -0.42 |
| IPI00478809 | Coagulation factor V precursor                                           | R.SEAYNTFSE.R                   | 2 | 3.13 | 0.34 | -2.78 |
| IPI00478809 | Coagulation factor V precursor                                           | R.SGPESPGSACR.A                 | 2 | 2.20 | 0.09 | -2.05 |
| IPI00478809 | Coagulation factor V precursor                                           | R.SQHLDNFSNQIGK.H               | 2 | 4.35 | 0.44 | -4.02 |
| IPI00478809 | Coagulation factor V precursor                                           | R.SQHLDNFSNQIGK.H               | 3 | 3.11 | 0.32 | -3.00 |
| IPI00478809 | Coagulation factor V precursor                                           | R.SSSPELSEM*LEYDR.S             | 2 | 4.31 | 0.48 | -5.08 |
| IPI00478809 | Coagulation factor V precursor                                           | R.TFHPLRSEAYNTFSE.R             | 2 | 3.28 | 0.35 | -5.62 |
| IPI00478809 | Coagulation factor V precursor                                           | R.TFHPLRSEAYNTFSE.R             | 3 | 2.26 | 0.30 | -3.67 |
| IPI00478816 | Serine protease inhibitor Kazal-type 5 precursor                         | R.AVFLTEALER.A                  | 2 | 2.60 | 0.18 | -3.78 |
| IPI00478860 | Glycoprotein endo-alpha-1,2-mannosidase                                  | R.DPSVIETHM*R.Q                 | 2 | 2.19 | 0.15 | -4.23 |
| IPI00478890 | Isoform 1 of Testican-3 precursor                                        | A.AAAAVAAAGGR.S                 | 1 | 2.36 | 0.27 | -3.46 |
| IPI00478890 | Isoform 1 of Testican-3 precursor                                        | A.AAAAVAAAGGR.S                 | 2 | 3.77 | 0.26 | -3.47 |
| IPI00478890 | Isoform 1 of Testican-3 precursor                                        | K.LEYQACVLGK.Q                  | 1 | 2.05 | 0.34 | -2.86 |
| IPI00478890 | Isoform 1 of Testican-3 precursor                                        | K.LEYQACVLGK.Q                  | 2 | 3.61 | 0.33 | -2.22 |
| IPI00478890 | Isoform 1 of Testican-3 precursor                                        | R.FDTSILPICK.D                  | 2 | 3.18 | 0.27 | -3.82 |
| IPI00478890 | Isoform 1 of Testican-3 precursor                                        | R.YGNEVM*GSR.I                  | 2 | 3.04 | 0.20 | -2.47 |
| IPI00478892 | Leucine-rich repeats and immunoglobulin-like domains protein 2 precursor | K.DFVCDDFLKPQIRTHPETIILR.G      | 3 | 3.40 | 0.15 |       |
| IPI00478892 | Leucine-rich repeats and immunoglobulin-like domains protein 2 precursor | K.DGGTDFPAAR.E                  | 2 | 2.77 | 0.28 | -3.70 |
| IPI00478892 | Leucine-rich repeats and immunoglobulin-like domains protein 2 precursor | K.DGGTDFPAARE.R                 | 2 | 3.04 | 0.33 | -4.68 |
| IPI00478892 | Leucine-rich repeats and immunoglobulin-like domains protein 2 precursor | K.LILQGNQIK.S                   | 2 | 2.37 | 0.15 | -2.08 |
| IPI00478892 | Leucine-rich repeats and immunoglobulin-like domains protein 2 precursor | R.ALSGLLPPDTAILDFSHNR.L         | 3 | 2.31 | 0.20 | -2.78 |

|             |                                                                            |                                     |   |      |      |       |
|-------------|----------------------------------------------------------------------------|-------------------------------------|---|------|------|-------|
| IPI00478986 | Similar to 40S ribosomal protein S4                                        | R.WM*LDKLTGVFAARPSTGPKLR.E          | 3 | 2.48 | 0.08 | 1.79  |
| IPI00478997 | V5-6 protein                                                               | R.FSGSSSGAER.Y                      | 2 | 2.50 | 0.14 |       |
| IPI00479083 | Isoform 2 of Erythroid differentiation-related factor 1                    | K.QMALFLDKMGSLLQKGNYSQSGMIPGSWQHK.M | 3 | 2.67 | 0.06 | -0.14 |
| IPI00479116 | Carboxypeptidase N subunit 2 precursor                                     | K.GQVVPALNEK.Q                      | 1 | 2.01 | 0.33 | -3.48 |
| IPI00479116 | Carboxypeptidase N subunit 2 precursor                                     | K.GQVVPALNEK.Q                      | 2 | 2.17 | 0.19 | -1.77 |
| IPI00479116 | Carboxypeptidase N subunit 2 precursor                                     | K.LSNNALSGLPQGVFGK.L                | 2 | 4.33 | 0.46 | -3.73 |
| IPI00479116 | Carboxypeptidase N subunit 2 precursor                                     | K.TLNLAQNLLAQLPEELFHPLTSLQTLK.L     | 3 | 4.25 | 0.36 | -4.23 |
| IPI00479116 | Carboxypeptidase N subunit 2 precursor                                     | K.TLNLAQNLLAQLPEELFHPLTSLQTLK.L     | 4 | 3.06 | 0.17 | -4.25 |
| IPI00479116 | Carboxypeptidase N subunit 2 precursor                                     | K.VVFLNTQLCQFRPDAFGGLPR.L           | 3 | 3.37 | 0.36 | -4.07 |
| IPI00479116 | Carboxypeptidase N subunit 2 precursor                                     | R.DHLGFQVTWPDESK.A                  | 2 | 4.36 | 0.55 | -2.80 |
| IPI00479116 | Carboxypeptidase N subunit 2 precursor                                     | R.SLM*LSYNAITHLPAGIFR.D             | 3 | 2.80 | 0.26 | -2.27 |
| IPI00479125 | SLIT-ROBO Rho GTPase-activating protein 2                                  | R.ELERQSSVK.H                       | 2 | 2.03 | 0.05 | 0.80  |
| IPI00479217 | Isoform Short of Heterogeneous nuclear ribonucleoprotein U                 | K.EKPYFPIPEEYTFIQNVPLEDR.V          | 3 | 3.82 | 0.31 | -2.82 |
| IPI00479361 | Isoform 1 of UDP-GlcNAc:betaGal beta-1,3-N-acetylglucosaminyltransferase 4 | R.NFSILLEPSGCSK.D                   | 2 | 2.43 | 0.10 |       |
| IPI00479514 | Voltage-dependent calcium channel subunit alpha-2/delta-1 precursor        | A.VEM*EDDDFTASLSK.Q                 | 2 | 4.16 | 0.48 | -3.90 |
| IPI00479514 | Voltage-dependent calcium channel subunit alpha-2/delta-1 precursor        | E.EPFPSAVTIK.S                      | 1 | 2.24 | 0.17 | -3.53 |
| IPI00479514 | Voltage-dependent calcium channel subunit alpha-2/delta-1 precursor        | K.AVEIYIQGK.L                       | 1 | 3.08 | 0.21 | -3.21 |
| IPI00479514 | Voltage-dependent calcium channel subunit alpha-2/delta-1 precursor        | K.AVEIYIQGK.L                       | 2 | 3.14 | 0.33 | -3.43 |
| IPI00479514 | Voltage-dependent calcium channel subunit alpha-2/delta-1 precursor        | K.DSETLKPDNFEESGYTFIAPR.D           | 3 | 3.23 | 0.34 | -3.22 |
| IPI00479514 | Voltage-dependent calcium channel subunit alpha-2/delta-1 precursor        | K.EAGENWQENPETYEDSFYKR.S            | 3 | 3.84 | 0.41 | -2.36 |
| IPI00479514 | Voltage-dependent calcium channel subunit alpha-2/delta-1 precursor        | K.GITDYKK.G                         | 1 | 1.72 | 0.07 | -2.81 |
| IPI00479514 | Voltage-dependent calcium channel subunit alpha-2/delta-1 precursor        | K.GYFFEIPSIGAIR.I                   | 1 | 1.54 | 0.36 | -3.99 |
| IPI00479514 | Voltage-dependent calcium channel subunit alpha-2/delta-1 precursor        | K.GYFFEIPSIGAIR.I                   | 2 | 3.77 | 0.34 | -5.12 |
| IPI00479514 | Voltage-dependent calcium channel subunit alpha-2/delta-1 precursor        | K.IDLYDVR.R                         | 2 | 2.38 | 0.25 | -2.33 |
| IPI00479514 | Voltage-dependent calcium channel subunit alpha-2/delta-1 precursor        | K.IIM*LFTDGGEER.A                   | 2 | 4.73 | 0.45 | -4.08 |
| IPI00479514 | Voltage-dependent calcium channel subunit alpha-2/delta-1 precursor        | K.IIM*LFTDGGEERAQEIFNK.Y            | 3 | 3.30 | 0.30 | -2.14 |

|             |                                                                     |                              |   |      |      |       |
|-------------|---------------------------------------------------------------------|------------------------------|---|------|------|-------|
| IPI00479514 | Voltage-dependent calcium channel subunit alpha-2/delta-1 precursor | K.IIM*LFTDGGEEERAQEIFNKYNK.D | 3 | 3.24 | 0.27 | -2.35 |
| IPI00479514 | Voltage-dependent calcium channel subunit alpha-2/delta-1 precursor | K.IIMLFTDGGEEER.A            | 2 | 2.66 | 0.36 | -5.79 |
| IPI00479514 | Voltage-dependent calcium channel subunit alpha-2/delta-1 precursor | K.KIDLVDVR.R                 | 2 | 2.11 | 0.05 | -3.74 |
| IPI00479514 | Voltage-dependent calcium channel subunit alpha-2/delta-1 precursor | K.LLKPAVVGIIK.I              | 1 | 2.51 | 0.23 | -4.13 |
| IPI00479514 | Voltage-dependent calcium channel subunit alpha-2/delta-1 precursor | K.LLKPAVVGIIK.I              | 2 | 1.38 | 0.06 | -0.63 |
| IPI00479514 | Voltage-dependent calcium channel subunit alpha-2/delta-1 precursor | K.M*KDSETLKPDNFEESGYTFIAPR.D | 2 | 3.42 | 0.44 | -3.94 |
| IPI00479514 | Voltage-dependent calcium channel subunit alpha-2/delta-1 precursor | K.M*KDSETLKPDNFEESGYTFIAPR.D | 3 | 6.41 | 0.55 | -3.28 |
| IPI00479514 | Voltage-dependent calcium channel subunit alpha-2/delta-1 precursor | K.M*KDSETLKPDNFEESGYTFIAPR.D | 4 | 2.82 | 0.14 | -1.10 |
| IPI00479514 | Voltage-dependent calcium channel subunit alpha-2/delta-1 precursor | K.M*QEDLVTLAK.T              | 1 | 2.39 | 0.26 | -3.00 |
| IPI00479514 | Voltage-dependent calcium channel subunit alpha-2/delta-1 precursor | K.M*QEDLVTLAK.T              | 2 | 3.10 | 0.28 | -3.46 |
| IPI00479514 | Voltage-dependent calcium channel subunit alpha-2/delta-1 precursor | K.NQLILGVM*GVDVSLEDIKR.L     | 3 | 3.18 | 0.25 | -3.60 |
| IPI00479514 | Voltage-dependent calcium channel subunit alpha-2/delta-1 precursor | K.NREEDPSLLWQVFGSATGLAR.Y    | 3 | 2.84 | 0.08 | -3.62 |
| IPI00479514 | Voltage-dependent calcium channel subunit alpha-2/delta-1 precursor | K.QSCITEQTQYFFDNDSK.S        | 2 | 5.23 | 0.59 | -3.99 |
| IPI00479514 | Voltage-dependent calcium channel subunit alpha-2/delta-1 precursor | K.QSCITEQTQYFFDNDSK.S        | 3 | 4.39 | 0.44 | -3.25 |
| IPI00479514 | Voltage-dependent calcium channel subunit alpha-2/delta-1 precursor | K.SGPGAYESGIM*VSK.A          | 1 | 2.80 | 0.32 | -2.67 |
| IPI00479514 | Voltage-dependent calcium channel subunit alpha-2/delta-1 precursor | K.SGPGAYESGIM*VSK.A          | 2 | 4.19 | 0.45 | -4.20 |
| IPI00479514 | Voltage-dependent calcium channel subunit alpha-2/delta-1 precursor | K.SQEPVTLDFLDAELENEDIK.V     | 2 | 5.56 | 0.60 | -4.40 |
| IPI00479514 | Voltage-dependent calcium channel subunit alpha-2/delta-1 precursor | K.SQEPVTLDFLDAELENEDIK.V     | 3 | 4.24 | 0.28 | -2.98 |
| IPI00479514 | Voltage-dependent calcium channel subunit alpha-2/delta-1 precursor | K.SQEPVTLDFLDAELENEDIKVEIR.N | 3 | 3.06 | 0.32 | -3.73 |
| IPI00479514 | Voltage-dependent calcium channel subunit alpha-2/delta-1 precursor | K.SWVDKM*QEDLVTLAK.T         | 2 | 3.71 | 0.31 | -0.76 |
| IPI00479514 | Voltage-dependent calcium channel subunit alpha-2/delta-1 precursor | K.SWVDKM*QEDLVTLAK.T         | 3 | 2.30 | 0.07 | -0.69 |

|             |                                                                     |                                |   |      |      |       |
|-------------|---------------------------------------------------------------------|--------------------------------|---|------|------|-------|
| IPI00479514 | Voltage-dependent calcium channel subunit alpha-2/delta-1 precursor | K.SYDYQSVCEPGAAPK.Q            | 2 | 4.48 | 0.48 | -3.96 |
| IPI00479514 | Voltage-dependent calcium channel subunit alpha-2/delta-1 precursor | K.TASGVNQLVDIYEK.Y             | 2 | 4.62 | 0.34 | -3.11 |
| IPI00479514 | Voltage-dependent calcium channel subunit alpha-2/delta-1 precursor | K.TASGVNQLVDIYEKYQDLYTVEPNAR.Q | 2 | 4.02 | 0.49 | -3.13 |
| IPI00479514 | Voltage-dependent calcium channel subunit alpha-2/delta-1 precursor | K.TASGVNQLVDIYEKYQDLYTVEPNAR.Q | 3 | 4.22 | 0.40 | -3.08 |
| IPI00479514 | Voltage-dependent calcium channel subunit alpha-2/delta-1 precursor | K.TPNNPSCNADLINR.V             | 2 | 3.34 | 0.33 | 0.06  |
| IPI00479514 | Voltage-dependent calcium channel subunit alpha-2/delta-1 precursor | K.YQDLYTVEPNAR.Q               | 2 | 4.32 | 0.45 | -1.74 |
| IPI00479514 | Voltage-dependent calcium channel subunit alpha-2/delta-1 precursor | R.AQEIFNK.Y                    | 1 | 2.28 | 0.07 | -1.38 |
| IPI00479514 | Voltage-dependent calcium channel subunit alpha-2/delta-1 precursor | R.AQEIFNKYNK.D                 | 1 | 2.91 | 0.11 | -4.04 |
| IPI00479514 | Voltage-dependent calcium channel subunit alpha-2/delta-1 precursor | R.AQEIFNKYNK.D                 | 2 | 3.20 | 0.28 | -2.54 |
| IPI00479514 | Voltage-dependent calcium channel subunit alpha-2/delta-1 precursor | R.AQEIFNKYNKDK.K               | 2 | 3.92 | 0.22 | -2.57 |
| IPI00479514 | Voltage-dependent calcium channel subunit alpha-2/delta-1 precursor | R.DYCNDLK.I                    | 1 | 2.22 | 0.07 | -5.44 |
| IPI00479514 | Voltage-dependent calcium channel subunit alpha-2/delta-1 precursor | R.EEDPSLLWQVFGSATGLAR.Y        | 2 | 5.66 | 0.58 | -2.90 |
| IPI00479514 | Voltage-dependent calcium channel subunit alpha-2/delta-1 precursor | R.EEDPSLLWQVFGSATGLAR.Y        | 3 | 3.86 | 0.43 | -3.43 |
| IPI00479514 | Voltage-dependent calcium channel subunit alpha-2/delta-1 precursor | R.FFGEIDPSLM*R.H               | 2 | 3.55 | 0.42 | -3.68 |
| IPI00479514 | Voltage-dependent calcium channel subunit alpha-2/delta-1 precursor | R.FTLCPNGYFAIDPNGYVLLHPNLQPK.P | 3 | 4.94 | 0.46 | -3.66 |
| IPI00479514 | Voltage-dependent calcium channel subunit alpha-2/delta-1 precursor | R.FVVTGGITR.V                  | 1 | 1.80 | 0.18 | -3.61 |
| IPI00479514 | Voltage-dependent calcium channel subunit alpha-2/delta-1 precursor | R.FVVTGGITR.V                  | 2 | 3.50 | 0.31 | -2.43 |
| IPI00479514 | Voltage-dependent calcium channel subunit alpha-2/delta-1 precursor | R.IKPVFIEDANFGR.Q              | 2 | 3.40 | 0.43 | -2.25 |
| IPI00479514 | Voltage-dependent calcium channel subunit alpha-2/delta-1 precursor | R.IKPVFIEDANFGR.Q              | 3 | 4.10 | 0.40 | -1.37 |
| IPI00479514 | Voltage-dependent calcium channel subunit alpha-2/delta-1 precursor | R.INTQEYLDVLGRPM*VLAGDK.A      | 2 | 4.03 | 0.34 | -2.31 |
| IPI00479514 | Voltage-dependent calcium channel subunit alpha-2/delta-1 precursor | R.INTQEYLDVLGRPM*VLAGDK.A      | 3 | 3.72 | 0.32 | -2.73 |

|             |                                                                     |                                               |   |      |      |       |
|-------------|---------------------------------------------------------------------|-----------------------------------------------|---|------|------|-------|
| IPI00479514 | Voltage-dependent calcium channel subunit alpha-2/delta-1 precursor | R.INTQEYLDVLGRPM*VLAGDKAK.Q                   | 2 | 4.28 | 0.36 | -4.77 |
| IPI00479514 | Voltage-dependent calcium channel subunit alpha-2/delta-1 precursor | R.INTQEYLDVLGRPM*VLAGDKAK.Q                   | 3 | 4.34 | 0.35 | -3.70 |
| IPI00479514 | Voltage-dependent calcium channel subunit alpha-2/delta-1 precursor | R.INTQEYLDVLGRPM*VLAGDKAK.Q                   | 4 | 4.31 | 0.38 | -3.84 |
| IPI00479514 | Voltage-dependent calcium channel subunit alpha-2/delta-1 precursor | R.LLIQAEQTS DGPNPCDM*VK.Q                     | 2 | 6.47 | 0.52 | -3.72 |
| IPI00479514 | Voltage-dependent calcium channel subunit alpha-2/delta-1 precursor | R.LLIQAEQTS DGPNPCDM*VK.Q                     | 3 | 4.26 | 0.46 | -2.91 |
| IPI00479514 | Voltage-dependent calcium channel subunit alpha-2/delta-1 precursor | R.NSDVM*DCVILDDGGFLM*ANHDDYTNQIGR.F           | 3 | 5.58 | 0.49 | -3.19 |
| IPI00479514 | Voltage-dependent calcium channel subunit alpha-2/delta-1 precursor | R.QLVEIAAR.D                                  | 1 | 1.78 | 0.05 | -1.76 |
| IPI00479514 | Voltage-dependent calcium channel subunit alpha-2/delta-1 precursor | R.QLVEIAAR.D                                  | 2 | 2.12 | 0.20 | -5.39 |
| IPI00479514 | Voltage-dependent calcium channel subunit alpha-2/delta-1 precursor | R.TPNKIDLYDVR.R                               | 2 | 2.52 | 0.17 | -3.05 |
| IPI00479514 | Voltage-dependent calcium channel subunit alpha-2/delta-1 precursor | R.TPNKIDLYDVR.R                               | 3 | 3.30 | 0.25 | -2.58 |
| IPI00479514 | Voltage-dependent calcium channel subunit alpha-2/delta-1 precursor | R.TPNKIDLYDVRR.R                              | 3 | 2.36 | 0.14 | -1.36 |
| IPI00479514 | Voltage-dependent calcium channel subunit alpha-2/delta-1 precursor | R.TSVSEM*LETLSDDDFVNVASFNSNAQDVSCFQHLVQANVR.N | 3 | 5.56 | 0.61 | -3.16 |
| IPI00479514 | Voltage-dependent calcium channel subunit alpha-2/delta-1 precursor | R.TSVSEM*LETLSDDDFVNVASFNSNAQDVSCFQHLVQANVR.N | 4 | 5.00 | 0.39 | -3.25 |
| IPI00479514 | Voltage-dependent calcium channel subunit alpha-2/delta-1 precursor | R.VLLDAGFTNELVQNYWSK.Q                        | 2 | 5.45 | 0.55 | -5.18 |
| IPI00479514 | Voltage-dependent calcium channel subunit alpha-2/delta-1 precursor | R.VLLDAGFTNELVQNYWSK.Q                        | 3 | 5.38 | 0.48 | -4.49 |
| IPI00479514 | Voltage-dependent calcium channel subunit alpha-2/delta-1 precursor | W.QVFGSATGLAR.Y                               | 2 | 2.91 | 0.25 | -1.24 |
| IPI00479514 | Voltage-dependent calcium channel subunit alpha-2/delta-1 precursor | W.YIQGAASPK.D                                 | 1 | 2.71 | 0.28 | -4.97 |
| IPI00479514 | Voltage-dependent calcium channel subunit alpha-2/delta-1 precursor | W.YIQGAASPK.D                                 | 2 | 2.90 | 0.19 | -2.89 |
| IPI00479669 | Isoform 1 of Uncharacterized protein KIAA0701                       | S.LMNIQHFEDET VATVMPMKIQVSNTK.I               | 3 | 3.66 | 0.19 | -1.93 |
| IPI00479722 | Proteasome activator complex subunit 1                              | R.NAYAVLYDIILK.N                              | 2 | 4.57 | 0.38 | -3.03 |
| IPI00479997 | Stathmin                                                            | K.DLSLEEIQK.K                                 | 1 | 2.55 | 0.10 | -1.65 |
| IPI00479997 | Stathmin                                                            | K.DLSLEEIQK.K                                 | 2 | 2.76 | 0.11 | -2.42 |
| IPI00479997 | Stathmin                                                            | K.DLSLEEIQKK.L                                | 2 | 2.45 | 0.10 | -1.69 |
| IPI00479997 | Stathmin                                                            | K.SHEAEVLK.Q                                  | 2 | 2.82 | 0.08 | 0.07  |

|             |                                        |                                    |   |      |      |       |
|-------------|----------------------------------------|------------------------------------|---|------|------|-------|
| IPI00479997 | Stathmin                               | R.EHEKEVLQK.A                      | 2 | 2.65 | 0.20 | -3.69 |
| IPI00479997 | Stathmin                               | R.SKESVPEFPLSPPK.K                 | 2 | 3.37 | 0.41 | -3.97 |
| IPI00479997 | Stathmin                               | R.SKESVPEFPLSPPK.K                 | 3 | 2.60 | 0.18 | -2.08 |
| IPI00480159 | inositol polyphosphate-5-phosphatase F | -.M*ELFQAKDHYLQQGER.A              | 2 | 2.69 | 0.09 | -8.80 |
| IPI00480159 | inositol polyphosphate-5-phosphatase F | K.GDFTRTGERKLAGVM*K.D              | 2 | 2.32 | 0.12 | 2.84  |
| IPI00480183 | Protein                                | K.IVTTTGAVFAK.N                    | 1 | 1.92 | 0.25 | -3.82 |
| IPI00480183 | Protein                                | K.IVTTTGAVFAK.N                    | 2 | 3.18 | 0.45 | -2.87 |
| IPI00480183 | Protein                                | K.LIADLQPNTEYSFVLM*NR.G            | 2 | 4.72 | 0.53 | -3.51 |
| IPI00480183 | Protein                                | K.LIADLQPNTEYSFVLM*NR.G            | 3 | 4.40 | 0.48 | -2.30 |
| IPI00480183 | Protein                                | K.VTFDPTSSYTLEDLKPDTLYR.F          | 3 | 2.65 | 0.28 | -3.95 |
| IPI00480183 | Protein                                | R.AAGTEGPFQEVDGVATTR.Y             | 2 | 4.64 | 0.45 | -2.77 |
| IPI00480183 | Protein                                | R.GFYNRPLSPDLSYQCFVLASLKEPM*DQKR.Y | 5 | 3.09 | 0.27 | -2.96 |
| IPI00480183 | Protein                                | R.GPPSEAVR.A                       | 2 | 1.65 | 0.12 | -3.49 |
| IPI00480183 | Protein                                | R.GYQVTVYR.L                       | 2 | 2.73 | 0.33 | -1.26 |
| IPI00480183 | Protein                                | R.SDM*GVGVFTPTIAR.T                | 2 | 4.07 | 0.43 | -3.03 |
| IPI00480183 | Protein                                | R.TAQM*PSGPPR.K                    | 2 | 3.35 | 0.43 | -2.28 |
| IPI00480183 | Protein                                | R.TGEQAPSSPPR.R                    | 2 | 2.74 | 0.23 | -2.51 |
| IPI00480183 | Protein                                | R.TGEQAPSSPPR.V                    | 3 | 2.68 | 0.27 | -4.27 |
| IPI00480183 | Protein                                | R.VGGSM*LTPR.W                     | 2 | 3.09 | 0.22 | -3.15 |
| IPI00480183 | Protein                                | R.VLAFTAVGDGPPSPTIQVK.T            | 3 | 4.83 | 0.50 | -4.50 |
| IPI00480183 | Protein                                | R.VLAVNSIGR.G                      | 1 | 1.87 | 0.07 | -1.34 |
| IPI00480183 | Protein                                | R.VLAVNSIGR.G                      | 2 | 2.99 | 0.36 | -1.27 |
| IPI00480183 | Protein                                | R.VLAVNSIGRGPPEAVR.A               | 3 | 3.45 | 0.38 | -2.87 |
| IPI00480183 | Protein                                | R.VYYTPDSR.R                       | 2 | 2.18 | 0.31 | -3.29 |
| IPI00480183 | Protein                                | R.WFYIVVVIDR.V                     | 2 | 3.76 | 0.45 | -3.33 |
| IPI00480183 | Protein                                | R.YSIGGLSPFSEYAFR.V                | 2 | 4.41 | 0.51 | -4.96 |
| IPI00514285 | Prostaglandin D2 synthase 21kDa        | A.APEAQVSVQPNFQQDK.F               | 1 | 3.94 | 0.51 | -2.40 |
| IPI00514285 | Prostaglandin D2 synthase 21kDa        | A.APEAQVSVQPNFQQDK.F               | 2 | 5.88 | 0.54 | -8.98 |
| IPI00514285 | Prostaglandin D2 synthase 21kDa        | A.APEAQVSVQPNFQQDK.F               | 3 | 4.17 | 0.33 | -3.83 |
| IPI00514285 | Prostaglandin D2 synthase 21kDa        | A.APEAQVSVQPNFQQDKFLGR.W           | 2 | 5.43 | 0.56 | -5.58 |
| IPI00514285 | Prostaglandin D2 synthase 21kDa        | A.APEAQVSVQPNFQQDKFLGR.W           | 3 | 5.89 | 0.55 | -5.06 |
| IPI00514285 | Prostaglandin D2 synthase 21kDa        | A.GSLGYSYSR.S                      | 1 | 1.93 | 0.26 | -4.54 |
| IPI00514285 | Prostaglandin D2 synthase 21kDa        | A.GSLGYSYSR.S                      | 2 | 3.05 | 0.22 | 1.41  |
| IPI00514285 | Prostaglandin D2 synthase 21kDa        | A.PATDGGLNLTSTFLRK.N               | 2 | 3.80 | 0.43 | 0.83  |
| IPI00514285 | Prostaglandin D2 synthase 21kDa        | A.PEAQVSVQPNFQQDK.F                | 2 | 5.13 | 0.47 | -4.82 |
| IPI00514285 | Prostaglandin D2 synthase 21kDa        | A.PEAQVSVQPNFQQDKFLGR.W            | 2 | 5.00 | 0.53 | -5.35 |
| IPI00514285 | Prostaglandin D2 synthase 21kDa        | A.PEAQVSVQPNFQQDKFLGR.W            | 3 | 5.20 | 0.50 | -8.48 |
| IPI00514285 | Prostaglandin D2 synthase 21kDa        | A.QGFTEDTIVFLPQTDK.C               | 2 | 4.82 | 0.49 | -4.90 |
| IPI00514285 | Prostaglandin D2 synthase 21kDa        | A.QVSVQPNFQQDK.F                   | 2 | 3.18 | 0.19 | -3.23 |
| IPI00514285 | Prostaglandin D2 synthase 21kDa        | A.QVSVQPNFQQDKFLGR.W               | 2 | 3.45 | 0.39 | -2.39 |
| IPI00514285 | Prostaglandin D2 synthase 21kDa        | C.KSVVAPATDGGLNLTSTFLR.K           | 2 | 4.77 | 0.53 | -4.07 |
| IPI00514285 | Prostaglandin D2 synthase 21kDa        | D.LQAAPEAQVSVQPNFQQDK.F            | 2 | 6.15 | 0.49 | -3.06 |



|             |                                 |                                 |   |      |      |       |
|-------------|---------------------------------|---------------------------------|---|------|------|-------|
| IPI00514285 | Prostaglandin D2 synthase 21kDa | D.LQAAPEAQVSVQPNFQQDK.F         | 3 | 3.78 | 0.28 | -2.14 |
| IPI00514285 | Prostaglandin D2 synthase 21kDa | D.TIVFLPQTDK.C                  | 1 | 2.01 | 0.22 | -3.27 |
| IPI00514285 | Prostaglandin D2 synthase 21kDa | D.TIVFLPQTDK.C                  | 2 | 2.97 | 0.16 | -3.27 |
| IPI00514285 | Prostaglandin D2 synthase 21kDa | D.YDQYALLYSQGSK.G               | 2 | 4.84 | 0.51 | -3.28 |
| IPI00514285 | Prostaglandin D2 synthase 21kDa | D.YDQYALLYSQGSKGPGEDFR.M        | 3 | 4.70 | 0.54 | -0.58 |
| IPI00514285 | Prostaglandin D2 synthase 21kDa | E.AQVSVQPNFQQDK.F               | 1 | 2.38 | 0.26 | -2.84 |
| IPI00514285 | Prostaglandin D2 synthase 21kDa | E.AQVSVQPNFQQDK.F               | 2 | 4.05 | 0.39 | -4.01 |
| IPI00514285 | Prostaglandin D2 synthase 21kDa | E.AQVSVQPNFQQDKFLGR.W           | 2 | 5.22 | 0.59 | -2.77 |
| IPI00514285 | Prostaglandin D2 synthase 21kDa | E.DTIVFLPQTDK.C                 | 2 | 3.71 | 0.22 | -3.50 |
| IPI00514285 | Prostaglandin D2 synthase 21kDa | E.TDYDQYALLYSQGSK.G             | 2 | 3.38 | 0.27 | -0.92 |
| IPI00514285 | Prostaglandin D2 synthase 21kDa | F.TEDTIVFLPQTDK.C               | 2 | 4.74 | 0.45 | -4.92 |
| IPI00514285 | Prostaglandin D2 synthase 21kDa | G.DLQAAPEAQVSVQPNFQQDK.F        | 2 | 6.44 | 0.56 | -6.56 |
| IPI00514285 | Prostaglandin D2 synthase 21kDa | G.DLQAAPEAQVSVQPNFQQDK.F        | 3 | 5.35 | 0.40 | -5.17 |
| IPI00514285 | Prostaglandin D2 synthase 21kDa | G.DLQAAPEAQVSVQPNFQQDKFLGR.W    | 2 | 4.02 | 0.55 | -2.36 |
| IPI00514285 | Prostaglandin D2 synthase 21kDa | G.DLQAAPEAQVSVQPNFQQDKFLGR.W    | 3 | 3.62 | 0.44 | -3.31 |
| IPI00514285 | Prostaglandin D2 synthase 21kDa | G.FTEDTIVFLPQTDK.C              | 2 | 3.98 | 0.37 | -4.45 |
| IPI00514285 | Prostaglandin D2 synthase 21kDa | G.VLGDQLAAPEAQVSVQPNFQQDK.F     | 2 | 5.19 | 0.60 | -4.06 |
| IPI00514285 | Prostaglandin D2 synthase 21kDa | G.VLGDQLAAPEAQVSVQPNFQQDK.F     | 3 | 4.54 | 0.37 | -4.34 |
| IPI00514285 | Prostaglandin D2 synthase 21kDa | G.VLGDQLAAPEAQVSVQPNFQQDKFLGR.W | 3 | 4.59 | 0.39 | -3.03 |
| IPI00514285 | Prostaglandin D2 synthase 21kDa | K.AQGFTEDTIVFLPQTD.K            | 2 | 3.41 | 0.22 | -4.55 |
| IPI00514285 | Prostaglandin D2 synthase 21kDa | K.AQGFTEDTIVFLPQTDK.C           | 1 | 4.58 | 0.43 | -3.12 |
| IPI00514285 | Prostaglandin D2 synthase 21kDa | K.AQGFTEDTIVFLPQTDK.C           | 2 | 5.71 | 0.52 | -8.61 |
| IPI00514285 | Prostaglandin D2 synthase 21kDa | K.AQGFTEDTIVFLPQTDK.C           | 3 | 5.47 | 0.30 | -5.76 |
| IPI00514285 | Prostaglandin D2 synthase 21kDa | K.AQGFTEDTIVFLPQTDKCM*TEQ.-     | 2 | 5.29 | 0.52 | -6.00 |
| IPI00514285 | Prostaglandin D2 synthase 21kDa | K.AQGFTEDTIVFLPQTDKCM*TEQ.-     | 3 | 5.73 | 0.51 | -6.42 |
| IPI00514285 | Prostaglandin D2 synthase 21kDa | K.AQGFTEDTIVFLPQTDKCMTEQ.-      | 2 | 4.19 | 0.41 | -2.53 |
| IPI00514285 | Prostaglandin D2 synthase 21kDa | K.AQGFTEDTIVFLPQTDKCMTEQ.-      | 3 | 4.66 | 0.34 | -7.92 |
| IPI00514285 | Prostaglandin D2 synthase 21kDa | K.EKFTAF.C                      | 1 | 1.95 | 0.17 | -2.09 |
| IPI00514285 | Prostaglandin D2 synthase 21kDa | K.EKFTAFCK.A                    | 1 | 3.19 | 0.24 | -2.25 |
| IPI00514285 | Prostaglandin D2 synthase 21kDa | K.EKFTAFCK.A                    | 2 | 2.01 | 0.16 | -1.77 |
| IPI00514285 | Prostaglandin D2 synthase 21kDa | K.FTAFCKAQGFTEDTIVFLPQTDK.C     | 3 | 3.18 | 0.26 | -1.31 |
| IPI00514285 | Prostaglandin D2 synthase 21kDa | K.GPGEDFR.M                     | 1 | 1.89 | 0.11 | -3.93 |
| IPI00514285 | Prostaglandin D2 synthase 21kDa | K.GPGEDFRM*ATLYSR.T             | 3 | 1.95 | 0.12 | -2.79 |
| IPI00514285 | Prostaglandin D2 synthase 21kDa | K.KAALSM*CK.S                   | 2 | 1.93 | 0.13 | -3.09 |
| IPI00514285 | Prostaglandin D2 synthase 21kDa | K.NQCETRTM*LLQPAGSLGSYSYR.S     | 3 | 3.46 | 0.37 | -1.35 |
| IPI00514285 | Prostaglandin D2 synthase 21kDa | K.SVVAPATD.G                    | 1 | 1.86 | 0.28 | -2.18 |
| IPI00514285 | Prostaglandin D2 synthase 21kDa | K.SVVAPATDGGLNLTSTFLR.K         | 2 | 6.16 | 0.62 | -3.92 |
| IPI00514285 | Prostaglandin D2 synthase 21kDa | K.SVVAPATDGGLNLTSTFLR.K         | 3 | 4.67 | 0.49 | -2.57 |
| IPI00514285 | Prostaglandin D2 synthase 21kDa | K.SVVAPATDGGLNLTSTFLRK.N        | 2 | 4.31 | 0.46 | -2.86 |
| IPI00514285 | Prostaglandin D2 synthase 21kDa | K.SVVAPATDGGLNLTSTFLRK.N        | 3 | 2.53 | 0.22 | -2.92 |
| IPI00514285 | Prostaglandin D2 synthase 21kDa | L.GDLQAAPEAQVSVQPNFQQDK.F       | 2 | 4.91 | 0.54 | -1.06 |
| IPI00514285 | Prostaglandin D2 synthase 21kDa | L.GDLQAAPEAQVSVQPNFQQDK.F       | 3 | 4.12 | 0.25 | -0.83 |

|             |                                 |                                 |   |      |      |       |
|-------------|---------------------------------|---------------------------------|---|------|------|-------|
| IPI00514285 | Prostaglandin D2 synthase 21kDa | L.GDLQAAPEAQVSVQPNFQQDKFLGR.W   | 3 | 3.57 | 0.28 | -3.03 |
| IPI00514285 | Prostaglandin D2 synthase 21kDa | L.LQPAGSLGYSYSYR.S              | 1 | 2.45 | 0.28 | -2.23 |
| IPI00514285 | Prostaglandin D2 synthase 21kDa | L.LQPAGSLGYSYSYR.S              | 2 | 3.68 | 0.46 | -2.97 |
| IPI00514285 | Prostaglandin D2 synthase 21kDa | L.QPAGSLGYSYSYR.S               | 1 | 2.00 | 0.16 | -2.13 |
| IPI00514285 | Prostaglandin D2 synthase 21kDa | M.LLQPAGSLGYSYSYR.S             | 2 | 4.35 | 0.52 | -4.36 |
| IPI00514285 | Prostaglandin D2 synthase 21kDa | P.AGSLGYSYSYR.S                 | 2 | 3.21 | 0.22 | -0.53 |
| IPI00514285 | Prostaglandin D2 synthase 21kDa | P.EAQVSVQPNFQQDK.F              | 1 | 2.68 | 0.30 | -2.55 |
| IPI00514285 | Prostaglandin D2 synthase 21kDa | P.EAQVSVQPNFQQDK.F              | 2 | 4.46 | 0.44 | -4.66 |
| IPI00514285 | Prostaglandin D2 synthase 21kDa | P.EAQVSVQPNFQQDKFLGR.W          | 2 | 4.61 | 0.53 | -2.99 |
| IPI00514285 | Prostaglandin D2 synthase 21kDa | Q.AAPEAQVSVQPNFQQDK.F           | 2 | 4.91 | 0.51 | -3.65 |
| IPI00514285 | Prostaglandin D2 synthase 21kDa | Q.GFTEDTIVFLPQTDK.C             | 2 | 4.10 | 0.42 | -3.97 |
| IPI00514285 | Prostaglandin D2 synthase 21kDa | Q.PAGSLGYSYSYR.S                | 1 | 3.19 | 0.40 | -8.99 |
| IPI00514285 | Prostaglandin D2 synthase 21kDa | Q.PAGSLGYSYSYR.S                | 2 | 3.73 | 0.45 | -2.86 |
| IPI00514285 | Prostaglandin D2 synthase 21kDa | Q.PNFQQDKFLGR.W                 | 1 | 3.15 | 0.33 | -3.03 |
| IPI00514285 | Prostaglandin D2 synthase 21kDa | Q.PNFQQDKFLGR.W                 | 2 | 4.40 | 0.45 | -3.01 |
| IPI00514285 | Prostaglandin D2 synthase 21kDa | Q.VSVQPNFQQDKFLGR.W             | 2 | 3.94 | 0.43 | -2.79 |
| IPI00514285 | Prostaglandin D2 synthase 21kDa | R.M*ATLYSR.T                    | 2 | 2.22 | 0.28 | -6.25 |
| IPI00514285 | Prostaglandin D2 synthase 21kDa | R.M*ATLYSRTQTPR.A               | 3 | 1.85 | 0.22 | -0.13 |
| IPI00514285 | Prostaglandin D2 synthase 21kDa | R.MATLYSR.T                     | 2 | 1.66 | 0.17 | -2.17 |
| IPI00514285 | Prostaglandin D2 synthase 21kDa | R.TM*LLQPAGSLGS.Y               | 1 | 2.69 | 0.42 | -2.91 |
| IPI00514285 | Prostaglandin D2 synthase 21kDa | R.TM*LLQPAGSLGS.Y               | 2 | 3.41 | 0.30 | -1.90 |
| IPI00514285 | Prostaglandin D2 synthase 21kDa | R.TM*LLQPAGSLGSY.S              | 1 | 2.81 | 0.44 | -1.81 |
| IPI00514285 | Prostaglandin D2 synthase 21kDa | R.TM*LLQPAGSLGSY.S              | 2 | 3.63 | 0.42 | -2.18 |
| IPI00514285 | Prostaglandin D2 synthase 21kDa | R.TM*LLQPAGSLGSYS.Y             | 1 | 2.48 | 0.38 | -1.10 |
| IPI00514285 | Prostaglandin D2 synthase 21kDa | R.TM*LLQPAGSLGSYS.Y             | 2 | 3.49 | 0.39 | 0.36  |
| IPI00514285 | Prostaglandin D2 synthase 21kDa | R.TM*LLQPAGSLGSYSY.R            | 1 | 3.26 | 0.50 | -1.49 |
| IPI00514285 | Prostaglandin D2 synthase 21kDa | R.TM*LLQPAGSLGSYSY.R            | 2 | 3.65 | 0.44 | 0.10  |
| IPI00514285 | Prostaglandin D2 synthase 21kDa | R.TM*LLQPAGSLGYSYSYR.S          | 2 | 5.96 | 0.49 | -8.81 |
| IPI00514285 | Prostaglandin D2 synthase 21kDa | R.TM*LLQPAGSLGYSYSYR.S          | 3 | 5.50 | 0.48 | -4.26 |
| IPI00514285 | Prostaglandin D2 synthase 21kDa | R.TMLLQPAGSLGYSYSYR.S           | 2 | 5.31 | 0.51 | -3.64 |
| IPI00514285 | Prostaglandin D2 synthase 21kDa | R.TQTPRAELK.E                   | 2 | 2.22 | 0.06 | -0.48 |
| IPI00514285 | Prostaglandin D2 synthase 21kDa | R.WFSAGLASNSSWLR.E              | 1 | 3.54 | 0.34 | -0.98 |
| IPI00514285 | Prostaglandin D2 synthase 21kDa | R.WFSAGLASNSSWLR.E              | 2 | 5.03 | 0.48 | -7.00 |
| IPI00514285 | Prostaglandin D2 synthase 21kDa | S.VQPNFQQDKFLGR.W               | 2 | 3.04 | 0.44 | -4.87 |
| IPI00514285 | Prostaglandin D2 synthase 21kDa | S.VSVVETDYDQYALLYSQGSKGPGEDFR.M | 3 | 3.85 | 0.28 | -4.45 |
| IPI00514285 | Prostaglandin D2 synthase 21kDa | S.VVETDYDQYALLYSQGSK.G          | 2 | 5.82 | 0.58 | -5.60 |
| IPI00514285 | Prostaglandin D2 synthase 21kDa | S.VVETDYDQYALLYSQGSK.G          | 3 | 5.33 | 0.47 | -3.26 |
| IPI00514285 | Prostaglandin D2 synthase 21kDa | S.VVETDYDQYALLYSQGSKGPGEDFR.M   | 3 | 4.18 | 0.55 | -3.71 |
| IPI00514285 | Prostaglandin D2 synthase 21kDa | T.EDTIVFLPQTDK.C                | 2 | 3.23 | 0.22 | -4.08 |
| IPI00514285 | Prostaglandin D2 synthase 21kDa | T.M*LLQPAGSLGYSYSYR.S           | 2 | 4.71 | 0.48 | -3.20 |
| IPI00514285 | Prostaglandin D2 synthase 21kDa | V.SVQPNFQQDKFLGR.W              | 2 | 4.11 | 0.43 | -5.27 |
| IPI00514285 | Prostaglandin D2 synthase 21kDa | V.VETDYDQYALLYSQGSK.G           | 2 | 5.74 | 0.55 | -3.25 |

|             |                                                             |                                      |   |      |      |       |
|-------------|-------------------------------------------------------------|--------------------------------------|---|------|------|-------|
| IPI00514285 | Prostaglandin D2 synthase 21kDa                             | W.GSTYSVSVVETDYDQYALLYSQGSK.G        | 2 | 5.23 | 0.57 | -5.45 |
| IPI00514285 | Prostaglandin D2 synthase 21kDa                             | W.GSTYSVSVVETDYDQYALLYSQGSK.G        | 3 | 5.57 | 0.54 | -7.45 |
| IPI00514285 | Prostaglandin D2 synthase 21kDa                             | W.GSTYSVSVVETDYDQYALLYSQGSKGPGEDFR.M | 3 | 4.49 | 0.54 | -5.28 |
| IPI00514285 | Prostaglandin D2 synthase 21kDa                             | W.GSTYSVSVVETDYDQYALLYSQGSKGPGEDFR.M | 4 | 4.81 | 0.49 | -3.13 |
| IPI00514285 | Prostaglandin D2 synthase 21kDa                             | Y.ALLYSQGSK.G                        | 1 | 2.04 | 0.21 | -3.85 |
| IPI00514285 | Prostaglandin D2 synthase 21kDa                             | Y.ALLYSQGSKGPGEDFR.M                 | 2 | 3.53 | 0.42 | -5.38 |
| IPI00514285 | Prostaglandin D2 synthase 21kDa                             | Y.DQYALLYSQGSK.G                     | 2 | 4.01 | 0.47 | -5.26 |
| IPI00514285 | Prostaglandin D2 synthase 21kDa                             | Y.DQYALLYSQGSKGPGEDFR.M              | 2 | 5.05 | 0.53 | -3.27 |
| IPI00514285 | Prostaglandin D2 synthase 21kDa                             | Y.DQYALLYSQGSKGPGEDFR.M              | 3 | 3.77 | 0.43 | -2.73 |
| IPI00514285 | Prostaglandin D2 synthase 21kDa                             | Y.SQGSKGPGEDFR.M                     | 2 | 3.22 | 0.41 | -2.42 |
| IPI00514285 | Prostaglandin D2 synthase 21kDa                             | Y.SVSVVETDYDQYALLYSQGSK.G            | 2 | 6.40 | 0.61 | -5.67 |
| IPI00514285 | Prostaglandin D2 synthase 21kDa                             | Y.SVSVVETDYDQYALLYSQGSK.G            | 3 | 6.48 | 0.56 | -4.35 |
| IPI00514285 | Prostaglandin D2 synthase 21kDa                             | Y.SVSVVETDYDQYALLYSQGSKGPGEDFR.M     | 3 | 4.09 | 0.48 | -4.89 |
| IPI00514517 | V4-1 protein                                                | K.GQGSGVPSR.F                        | 1 | 2.14 | 0.09 |       |
| IPI00514517 | V4-1 protein                                                | R.YLLYYSDSDKGQSGVPSR.F               | 3 | 3.85 | 0.41 |       |
| IPI00514594 | Isoform 1 of Protein FAM5B precursor                        | R.KDFFSLPLPLAPEFIR.N                 | 3 | 2.96 | 0.28 | -2.79 |
| IPI00514622 | Ran-binding protein 6                                       | R.QWGLCIFDDIIHCSPTSFKYVEYFR.W        | 3 | 2.57 | 0.06 | 0.89  |
| IPI00514676 | myelin oligodendrocyte glycoprotein isoform beta2 precursor | A.LVGDEVELPCR.I                      | 1 | 2.31 | 0.18 | -3.79 |
| IPI00514676 | myelin oligodendrocyte glycoprotein isoform beta2 precursor | K.DQDGDQAPEYR.G                      | 2 | 3.76 | 0.47 | -3.71 |
| IPI00514676 | myelin oligodendrocyte glycoprotein isoform beta2 precursor | R.ALVGDEVELPCR.I                     | 2 | 3.76 | 0.47 | -3.77 |
| IPI00514676 | myelin oligodendrocyte glycoprotein isoform beta2 precursor | R.ALVGDEVELPCR.I                     | 3 | 3.68 | 0.18 | -3.14 |
| IPI00514676 | myelin oligodendrocyte glycoprotein isoform beta2 precursor | R.DHSYQEEAAM*ELK.V                   | 3 | 3.26 | 0.26 | 0.06  |
| IPI00514676 | myelin oligodendrocyte glycoprotein isoform beta2 precursor | R.FSDEGGFTCFFR.D                     | 2 | 4.29 | 0.47 | -4.30 |
| IPI00514676 | myelin oligodendrocyte glycoprotein isoform beta2 precursor | R.GRELLKDAIGEGK.V                    | 2 | 3.82 | 0.37 | -3.67 |
| IPI00514676 | myelin oligodendrocyte glycoprotein isoform beta2 precursor | R.GRELLKDAIGEGK.V                    | 3 | 4.77 | 0.32 | -2.73 |
| IPI00514676 | myelin oligodendrocyte glycoprotein isoform beta2 precursor | R.NGKDQDGDQAPEYR.G                   | 2 | 4.01 | 0.50 | -3.41 |
| IPI00514676 | myelin oligodendrocyte glycoprotein isoform beta2 precursor | R.NGKDQDGDQAPEYR.G                   | 3 | 3.77 | 0.32 | -0.95 |
| IPI00514676 | myelin oligodendrocyte glycoprotein isoform beta2 precursor | R.TELLKDAIGEGK.V                     | 3 | 3.34 | 0.30 | -1.49 |
| IPI00514676 | myelin oligodendrocyte glycoprotein isoform beta2 precursor | R.TELLKDAIGEGKVTLR.I                 | 3 | 3.05 | 0.28 | -3.81 |

|             |                                                             |                                        |   |      |      |       |
|-------------|-------------------------------------------------------------|----------------------------------------|---|------|------|-------|
| IPI00514676 | myelin oligodendrocyte glycoprotein isoform beta2 precursor | R.TELLKDAIGEGKVTLR.I                   | 4 | 2.73 | 0.28 | -3.74 |
| IPI00514893 | Disheveled-associated activator of morphogenesis 2          | K.VLAAGSSLEEGGFDDLVSALRSGEVFDKDLCKLK.R | 3 | 2.94 | 0.13 |       |
| IPI00515041 | Uncharacterized protein CFH                                 | K.AQTTVTTCM*ENGWSPTPR.C                | 2 | 4.82 | 0.42 |       |
| IPI00515041 | Uncharacterized protein CFH                                 | K.AQTTVTTCMENGWSPTPR.C                 | 2 | 2.54 | 0.17 |       |
| IPI00515041 | Uncharacterized protein CFH                                 | K.AVYTCNEGYQLLGEINYR.E                 | 2 | 5.34 | 0.49 | -2.57 |
| IPI00515041 | Uncharacterized protein CFH                                 | K.AVYTCNEGYQLLGEINYR.E                 | 3 | 3.53 | 0.09 | -2.56 |
| IPI00515041 | Uncharacterized protein CFH                                 | K.CNM*GYEYSER.G                        | 2 | 2.74 | 0.30 | -3.66 |
| IPI00515041 | Uncharacterized protein CFH                                 | K.CNM*GYEYSERGDVCTESGWRPLPSCEEK.S      | 3 | 4.54 | 0.33 |       |
| IPI00515041 | Uncharacterized protein CFH                                 | K.CNMGYEYSERGDVCTESGWRPLPSCEEK.S       | 3 | 5.47 | 0.44 |       |
| IPI00515041 | Uncharacterized protein CFH                                 | K.CTSTGWIPAPR.C                        | 2 | 2.94 | 0.45 | -2.15 |
| IPI00515041 | Uncharacterized protein CFH                                 | K.IIYKENER.F                           | 1 | 2.62 | 0.07 |       |
| IPI00515041 | Uncharacterized protein CFH                                 | K.IIYKENER.F                           | 2 | 2.39 | 0.18 | -3.55 |
| IPI00515041 | Uncharacterized protein CFH                                 | K.IIYKENERFYK.C                        | 2 | 2.83 | 0.05 |       |
| IPI00515041 | Uncharacterized protein CFH                                 | K.RPCGHPGDTPFGTFTLTGGNVFEYGVK.A        | 3 | 6.37 | 0.52 |       |
| IPI00515041 | Uncharacterized protein CFH                                 | K.SCDNPYIPNGDYSPLR.I                   | 2 | 4.05 | 0.42 | -1.90 |
| IPI00515041 | Uncharacterized protein CFH                                 | K.SIDVACHPGYALPK.A                     | 1 | 2.38 | 0.12 |       |
| IPI00515041 | Uncharacterized protein CFH                                 | K.SIDVACHPGYALPK.A                     | 2 | 3.96 | 0.28 |       |
| IPI00515041 | Uncharacterized protein CFH                                 | K.SPDVINGSPISQK.I                      | 2 | 4.04 | 0.29 | -1.68 |
| IPI00515041 | Uncharacterized protein CFH                                 | R.GDAVCTESGWRPLPSCEEK.S                | 2 | 4.59 | 0.41 |       |
| IPI00515041 | Uncharacterized protein CFH                                 | R.GDAVCTESGWRPLPSCEEK.S                | 3 | 3.58 | 0.25 |       |
| IPI00515041 | Uncharacterized protein CFH                                 | R.KGEWVALNPLR.K                        | 2 | 3.51 | 0.23 |       |
| IPI00515041 | Uncharacterized protein CFH                                 | R.KGEWVALNPLR.K                        | 3 | 4.13 | 0.10 |       |
| IPI00515041 | Uncharacterized protein CFH                                 | R.NGFYPATR.G                           | 2 | 2.29 | 0.11 |       |
| IPI00515041 | Uncharacterized protein CFH                                 | R.NTEILTGSWSDQTYPEGTQAIYK.C            | 2 | 4.68 | 0.58 | -3.39 |
| IPI00515041 | Uncharacterized protein CFH                                 | R.NTEILTGSWSDQTYPEGTQAIYK.C            | 3 | 3.65 | 0.38 | -5.24 |
| IPI00515041 | Uncharacterized protein CFH                                 | R.RNTEILTGSWSDQTYPEGTQAIYK.C           | 2 | 5.12 | 0.41 |       |
| IPI00515041 | Uncharacterized protein CFH                                 | R.RNTEILTGSWSDQTYPEGTQAIYK.C           | 3 | 3.88 | 0.25 |       |
| IPI00515041 | Uncharacterized protein CFH                                 | R.RPYFPVAVGK.Y                         | 1 | 1.68 | 0.07 | -2.78 |
| IPI00515041 | Uncharacterized protein CFH                                 | R.RPYFPVAVGK.Y                         | 2 | 3.15 | 0.20 | -3.65 |
| IPI00515041 | Uncharacterized protein CFH                                 | R.SLGNVIM*VCR.K                        | 2 | 2.91 | 0.37 | 0.97  |
| IPI00515041 | Uncharacterized protein CFH                                 | R.SLGNVIMVCR.K                         | 2 | 3.70 | 0.35 |       |
| IPI00549330 | Myosin-reactive immunoglobulin light chain variable region  | -.EIVM*TQSPATLSVSPGER.A                | 2 | 4.01 | 0.28 |       |
| IPI00549330 | Myosin-reactive immunoglobulin light chain variable region  | -.EIVM*TQSPATLSVSPGER.A                | 3 | 3.27 | 0.20 |       |
| IPI00549330 | Myosin-reactive immunoglobulin light chain variable region  | -.EIVMTQSPATLSVSPGER.A                 | 2 | 4.41 | 0.23 |       |
| IPI00549330 | Myosin-reactive immunoglobulin light chain variable region  | -.EIVMTQSPATLSVSPGER.A                 | 3 | 4.58 | 0.17 |       |

|             |                                                                        |                                   |   |      |      |       |
|-------------|------------------------------------------------------------------------|-----------------------------------|---|------|------|-------|
| IPI00549330 | Myosin-reactive immunoglobulin light chain variable region             | R.ASQSVSSNLAWYQQKPGQAPR.L         | 2 | 4.96 | 0.48 |       |
| IPI00549330 | Myosin-reactive immunoglobulin light chain variable region             | R.ASQSVSSNLAWYQQKPGQAPR.L         | 3 | 3.57 | 0.30 |       |
| IPI00549330 | Myosin-reactive immunoglobulin light chain variable region             | R.LLIYGASTR.A                     | 2 | 3.10 | 0.20 |       |
| IPI00549972 | LIM domain-containing protein 2                                        | K.TVYPMERLVADKLIFHNSCFCK.H        | 3 | 3.13 | 0.13 | -0.84 |
| IPI00550115 | Isoform 1 of Acid sphingomyelinase-like phosphodiesterase 3b precursor | K.AGDM*VYIVGHVPPGFEEK.T           | 2 | 4.22 | 0.48 | -6.21 |
| IPI00550115 | Isoform 1 of Acid sphingomyelinase-like phosphodiesterase 3b precursor | K.AGDM*VYIVGHVPPGFEEK.T           | 3 | 4.03 | 0.40 | -0.51 |
| IPI00550115 | Isoform 1 of Acid sphingomyelinase-like phosphodiesterase 3b precursor | K.LGEAAVLEIVER.L                  | 2 | 3.57 | 0.27 | -1.82 |
| IPI00550115 | Isoform 1 of Acid sphingomyelinase-like phosphodiesterase 3b precursor | K.TTLPGVVNGANPAIR.V               | 2 | 3.38 | 0.38 | -3.15 |
| IPI00550115 | Isoform 1 of Acid sphingomyelinase-like phosphodiesterase 3b precursor | K.VYAALGNHDFHPK.N                 | 2 | 4.15 | 0.44 | -3.88 |
| IPI00550115 | Isoform 1 of Acid sphingomyelinase-like phosphodiesterase 3b precursor | R.IAGDQSTLQR.Y                    | 2 | 3.12 | 0.28 | -1.79 |
| IPI00550162 | IGLV3-25 protein                                                       | -.SYELTQPPSVSVSPGQTAR.I           | 2 | 5.32 | 0.55 |       |
| IPI00550162 | IGLV3-25 protein                                                       | K.AAPSVTLFPPSSEELQANK.A           | 1 | 4.04 | 0.50 |       |
| IPI00550162 | IGLV3-25 protein                                                       | K.AAPSVTLFPPSSEELQANK.A           | 2 | 3.15 | 0.34 | -1.50 |
| IPI00550162 | IGLV3-25 protein                                                       | K.AAPSVTLFPPSSEELQANK.A           | 3 | 3.32 | 0.13 |       |
| IPI00550162 | IGLV3-25 protein                                                       | K.ADSSPVKAGVETTTPSK.Q             | 1 | 3.85 | 0.37 |       |
| IPI00550162 | IGLV3-25 protein                                                       | K.ADSSPVKAGVETTTPSK.Q             | 2 | 3.50 | 0.38 |       |
| IPI00550162 | IGLV3-25 protein                                                       | K.ADSSPVKAGVETTTPSK.Q             | 3 | 3.46 | 0.35 |       |
| IPI00550162 | IGLV3-25 protein                                                       | K.ADSSPVKAGVETTTPSKQSNK.Y         | 2 | 5.35 | 0.42 |       |
| IPI00550162 | IGLV3-25 protein                                                       | K.ADSSPVKAGVETTTPSKQSNK.Y         | 3 | 4.61 | 0.23 |       |
| IPI00550162 | IGLV3-25 protein                                                       | K.AGVETTTPSK.Q                    | 2 | 2.62 | 0.09 | -3.23 |
| IPI00550162 | IGLV3-25 protein                                                       | K.AGVETTTPSKQSNK.Y                | 2 | 4.14 | 0.32 |       |
| IPI00550162 | IGLV3-25 protein                                                       | K.AGVETTTPSKQSNKYAASSYLSLTPEQWK.S | 3 | 5.47 | 0.40 |       |
| IPI00550162 | IGLV3-25 protein                                                       | K.ATLVCLISDFYPGAVTVAWK.A          | 2 | 5.07 | 0.50 |       |
| IPI00550162 | IGLV3-25 protein                                                       | K.ATLVCLISDFYPGAVTVAWK.A          | 3 | 3.53 | 0.31 | -3.63 |
| IPI00550162 | IGLV3-25 protein                                                       | K.ATLVCLISDFYPGAVTVAWKADSSPVK.A   | 3 | 3.81 | 0.20 |       |
| IPI00550162 | IGLV3-25 protein                                                       | K.DNERPSGIPER.F                   | 3 | 2.92 | 0.12 |       |
| IPI00550162 | IGLV3-25 protein                                                       | K.QSNNKYAASSYLSLTPEQWK.S          | 2 | 5.38 | 0.37 |       |
| IPI00550162 | IGLV3-25 protein                                                       | K.QSNNKYAASSYLSLTPEQWK.S          | 3 | 4.26 | 0.33 |       |
| IPI00550162 | IGLV3-25 protein                                                       | K.YAASSYLSLTPEQWK.S               | 1 | 3.49 | 0.43 |       |
| IPI00550162 | IGLV3-25 protein                                                       | K.YAASSYLSLTPEQWK.S               | 2 | 5.52 | 0.47 |       |
| IPI00550162 | IGLV3-25 protein                                                       | K.YAASSYLSLTPEQWK.S               | 3 | 3.44 | 0.22 |       |
| IPI00550162 | IGLV3-25 protein                                                       | R.ITCSGDALPK.Q                    | 2 | 2.29 | 0.17 |       |
| IPI00550162 | IGLV3-25 protein                                                       | R.SYSCQVTHEGSTVEK.T               | 1 | 3.84 | 0.43 |       |

|             |                                                                     |                                         |   |      |      |       |
|-------------|---------------------------------------------------------------------|-----------------------------------------|---|------|------|-------|
| IPI00550162 | IGLV3-25 protein                                                    | R.SYSCQVTHEGSTVEK.T                     | 2 | 3.17 | 0.41 | -4.10 |
| IPI00550162 | IGLV3-25 protein                                                    | R.SYSCQVTHEGSTVEKTVAPTECS.-             | 2 | 5.35 | 0.45 |       |
| IPI00550162 | IGLV3-25 protein                                                    | R.SYSCQVTHEGSTVEKTVAPTECS.-             | 3 | 2.78 | 0.26 |       |
| IPI00550232 | cardiomyopathy associated 3 isoform 1                               | K.TNTSTGLKM*AMER.S                      | 2 | 1.81 | 0.06 | -2.64 |
| IPI00550263 | Isoform 5 of Serine/threonine-protein kinase MRCK alpha             | R.DVLVNGDNK.W                           | 2 | 1.62 | 0.15 | -3.22 |
| IPI00550363 | Transgelin-2                                                        | K.DGTVLCELINALYPEGQAPVKK.I              | 3 | 3.43 | 0.38 | -4.77 |
| IPI00550363 | Transgelin-2                                                        | K.GASQAGM*TYGM*PR.Q                     | 2 | 3.55 | 0.56 | -1.72 |
| IPI00550363 | Transgelin-2                                                        | R.GPAYGLSR.E                            | 2 | 1.89 | 0.21 | -1.54 |
| IPI00550363 | Transgelin-2                                                        | R.NFSDNQLQEGK.N                         | 2 | 3.34 | 0.22 | -3.25 |
| IPI00550363 | Transgelin-2                                                        | R.YGINTTDIFQTVDLWEGK.N                  | 2 | 4.45 | 0.37 | -5.28 |
| IPI00550364 | Phosphoglucomutase-2                                                | K.ELNELVSAIEEHFFQPQK.Y                  | 3 | 3.22 | 0.18 | -4.81 |
| IPI00550533 | Isoform 1 of Uncharacterized protein C1orf56 precursor              | R.IILEDENDAM*ADADR.L                    | 2 | 4.88 | 0.57 | -2.57 |
| IPI00550533 | Isoform 1 of Uncharacterized protein C1orf56 precursor              | R.VGALSQR.T                             | 2 | 2.43 | 0.11 | -1.73 |
| IPI00550558 | Protein O-linked-mannose beta-1,2-N-acetylglucosaminyltransferase 1 | K.ASLTATFNLFPK.F                        | 2 | 3.53 | 0.43 | -7.57 |
| IPI00550558 | Protein O-linked-mannose beta-1,2-N-acetylglucosaminyltransferase 1 | K.DEGSFHLKDTAK.A                        | 2 | 2.73 | 0.19 | -3.13 |
| IPI00550558 | Protein O-linked-mannose beta-1,2-N-acetylglucosaminyltransferase 1 | K.DPTPIEFSPDPLPDNK.V                    | 2 | 3.86 | 0.44 | -2.16 |
| IPI00550558 | Protein O-linked-mannose beta-1,2-N-acetylglucosaminyltransferase 1 | K.DPTPIEFSPDPLPDNKVLNVPVAVIAGNRPNYLYR.M | 4 | 2.89 | 0.22 | -2.79 |
| IPI00550558 | Protein O-linked-mannose beta-1,2-N-acetylglucosaminyltransferase 1 | K.EAYEVEVHR.L                           | 2 | 3.20 | 0.25 | -2.88 |
| IPI00550558 | Protein O-linked-mannose beta-1,2-N-acetylglucosaminyltransferase 1 | K.FNTVPGVQLR.N                          | 2 | 2.83 | 0.22 | -1.41 |
| IPI00550558 | Protein O-linked-mannose beta-1,2-N-acetylglucosaminyltransferase 1 | K.GGPVFGK.H                             | 1 | 2.04 | 0.10 | -1.72 |
| IPI00550558 | Protein O-linked-mannose beta-1,2-N-acetylglucosaminyltransferase 1 | K.KPPSVTPIFLEPPPKEEGAPGAPEQT.-          | 2 | 4.57 | 0.39 | -2.23 |
| IPI00550558 | Protein O-linked-mannose beta-1,2-N-acetylglucosaminyltransferase 1 | K.KPPSVTPIFLEPPPKEEGAPGAPEQT.-          | 3 | 3.46 | 0.28 | -2.60 |
| IPI00550558 | Protein O-linked-mannose beta-1,2-N-acetylglucosaminyltransferase 1 | K.NHFLVVGVPASPYSVK.K                    | 2 | 4.73 | 0.46 | -3.49 |
| IPI00550558 | Protein O-linked-mannose beta-1,2-N-acetylglucosaminyltransferase 1 | K.NHFLVVGVPASPYSVK.K                    | 3 | 2.49 | 0.12 | -4.11 |
| IPI00550558 | Protein O-linked-mannose beta-1,2-N-acetylglucosaminyltransferase 1 | K.NPCEDSFLPDTEGHTYVAFIR.M               | 3 | 3.29 | 0.23 | -1.99 |
| IPI00550558 | Protein O-linked-mannose beta-1,2-N-acetylglucosaminyltransferase 1 | K.RVFDTYSPHEDEAM*VLFLNM*VAPGR.V         | 3 | 4.10 | 0.44 | -3.45 |

|             |                                                                     |                                |   |      |      |       |
|-------------|---------------------------------------------------------------------|--------------------------------|---|------|------|-------|
| IPI00550558 | Protein O-linked-mannose beta-1,2-N-acetylglucosaminyltransferase 1 | K.SPALSSWGDPVLLK.T             | 2 | 4.60 | 0.44 | -2.29 |
| IPI00550558 | Protein O-linked-mannose beta-1,2-N-acetylglucosaminyltransferase 1 | K.TDVPLSSAEEAECHWADTELNR.R     | 3 | 1.87 | 0.18 | -0.41 |
| IPI00550558 | Protein O-linked-mannose beta-1,2-N-acetylglucosaminyltransferase 1 | K.VLNVVPAVIAGNRPNLYR.M         | 2 | 3.30 | 0.26 | -3.11 |
| IPI00550558 | Protein O-linked-mannose beta-1,2-N-acetylglucosaminyltransferase 1 | K.VLNVVPAVIAGNRPNLYR.M         | 3 | 2.02 | 0.18 | -3.14 |
| IPI00550558 | Protein O-linked-mannose beta-1,2-N-acetylglucosaminyltransferase 1 | K.VYVAVDGTTVLEDEAREQGR.G       | 3 | 2.50 | 0.13 | -3.61 |
| IPI00550558 | Protein O-linked-mannose beta-1,2-N-acetylglucosaminyltransferase 1 | R.DTWAFVGR.K                   | 2 | 2.65 | 0.21 | -1.30 |
| IPI00550558 | Protein O-linked-mannose beta-1,2-N-acetylglucosaminyltransferase 1 | R.GIQHTPISIK.N                 | 1 | 2.40 | 0.31 | -3.73 |
| IPI00550558 | Protein O-linked-mannose beta-1,2-N-acetylglucosaminyltransferase 1 | R.GIQHTPISIK.N                 | 2 | 3.42 | 0.33 | -1.84 |
| IPI00550558 | Protein O-linked-mannose beta-1,2-N-acetylglucosaminyltransferase 1 | R.KGGPVFGEK.H                  | 1 | 2.29 | 0.20 | -4.92 |
| IPI00550558 | Protein O-linked-mannose beta-1,2-N-acetylglucosaminyltransferase 1 | R.KGGPVFGEK.H                  | 2 | 2.56 | 0.25 | -3.56 |
| IPI00550558 | Protein O-linked-mannose beta-1,2-N-acetylglucosaminyltransferase 1 | R.NVDSLKK.E                    | 2 | 2.09 | 0.10 | -4.00 |
| IPI00550558 | Protein O-linked-mannose beta-1,2-N-acetylglucosaminyltransferase 1 | R.RVLDVEVYSSR.S                | 2 | 3.90 | 0.41 | -3.84 |
| IPI00550558 | Protein O-linked-mannose beta-1,2-N-acetylglucosaminyltransferase 1 | R.SLGSQAGPALGWR.D              | 2 | 3.36 | 0.35 | -2.13 |
| IPI00550558 | Protein O-linked-mannose beta-1,2-N-acetylglucosaminyltransferase 1 | R.SYHFGIVGLNM*NGYFHEAYFK.K     | 3 | 3.16 | 0.36 | -3.96 |
| IPI00550558 | Protein O-linked-mannose beta-1,2-N-acetylglucosaminyltransferase 1 | R.SYHFGIVGLNM*NGYFHEAYFK.K     | 4 | 3.32 | 0.28 | -4.44 |
| IPI00550558 | Protein O-linked-mannose beta-1,2-N-acetylglucosaminyltransferase 1 | R.VETM*PGLGWVLR.R              | 2 | 4.16 | 0.37 | -4.60 |
| IPI00550558 | Protein O-linked-mannose beta-1,2-N-acetylglucosaminyltransferase 1 | R.VFDTYSPHEDEAM*VLFLLM*VAPGR.V | 3 | 2.64 | 0.20 | -2.24 |
| IPI00550558 | Protein O-linked-mannose beta-1,2-N-acetylglucosaminyltransferase 1 | R.VLDVEVYSSR.S                 | 1 | 1.79 | 0.12 | -2.22 |
| IPI00550558 | Protein O-linked-mannose beta-1,2-N-acetylglucosaminyltransferase 1 | R.VLDVEVYSSR.S                 | 2 | 4.05 | 0.41 | -3.95 |
| IPI00550677 | WSC domain-containing protein 1                                     | K.DLINGYIR.T                   | 2 | 2.47 | 0.09 | -1.51 |
| IPI00550677 | WSC domain-containing protein 1                                     | R.SHDPEPFTPEM*K.D              | 2 | 3.00 | 0.34 | -4.31 |
| IPI00550720 | Isoform 1 of Uncharacterized protein C19orf57                       | R.GSSTTSVAQISQGEDKMTKRK.K      | 3 | 3.21 | 0.14 | 1.99  |
| IPI00550731 | Putative uncharacterized protein                                    | G.DVVM*TQSPLSLPVTLGQPASISCR.S  | 2 | 5.13 | 0.37 |       |

|             |                                                         |                                          |   |      |      |       |
|-------------|---------------------------------------------------------|------------------------------------------|---|------|------|-------|
| IPI00550731 | Putative uncharacterized protein                        | G.DVVM*TSPLSLPVLGQPASISCR.S              | 3 | 6.55 | 0.44 |       |
| IPI00550731 | Putative uncharacterized protein                        | K.ADYEKHKVYACEVTHQGLSSPVTK.S             | 3 | 6.20 | 0.45 |       |
| IPI00550731 | Putative uncharacterized protein                        | K.DSTYLSSTLTLSK.A                        | 1 | 3.19 | 0.31 |       |
| IPI00550731 | Putative uncharacterized protein                        | K.DSTYLSSTLTLSK.A                        | 2 | 2.59 | 0.17 | -2.80 |
| IPI00550731 | Putative uncharacterized protein                        | K.DSTYLSSTLTLSK.A                        | 3 | 3.23 | 0.27 |       |
| IPI00550731 | Putative uncharacterized protein                        | K.HKVYACEVTHQGLSSPVTK.S                  | 3 | 4.56 | 0.36 |       |
| IPI00550731 | Putative uncharacterized protein                        | K.RTVAAPSVFIFPPSDEQLK.S                  | 2 | 5.74 | 0.42 |       |
| IPI00550731 | Putative uncharacterized protein                        | K.RTVAAPSVFIFPPSDEQLK.S                  | 3 | 4.14 | 0.22 |       |
| IPI00550731 | Putative uncharacterized protein                        | K.SGTASVVCLLNFFYPR.E                     | 1 | 4.08 | 0.39 |       |
| IPI00550731 | Putative uncharacterized protein                        | K.SGTASVVCLLNFFYPR.E                     | 2 | 3.05 | 0.36 | -5.56 |
| IPI00550731 | Putative uncharacterized protein                        | K.SGTASVVCLLNFFYPR.E                     | 3 | 4.63 | 0.31 |       |
| IPI00550731 | Putative uncharacterized protein                        | K.VDNALQSGNSQESVTEQDSK.D                 | 2 | 5.40 | 0.58 | -3.51 |
| IPI00550731 | Putative uncharacterized protein                        | K.VDNALQSGNSQESVTEQDSK.D                 | 3 | 4.56 | 0.42 | -2.63 |
| IPI00550731 | Putative uncharacterized protein                        | K.VDNALQSGNSQESVTEQDSKDYLSSTLTLSK.A      | 2 | 3.56 | 0.49 |       |
| IPI00550731 | Putative uncharacterized protein                        | K.VDNALQSGNSQESVTEQDSKDYLSSTLTLSK.A      | 3 | 6.26 | 0.51 |       |
| IPI00550731 | Putative uncharacterized protein                        | K.VDNALQSGNSQESVTEQDSKDYLSSTLTLSKADYEK.H | 3 | 4.65 | 0.36 |       |
| IPI00550731 | Putative uncharacterized protein                        | K.VQWKVDNALQSGNSQESVTEQDSK.D             | 2 | 5.17 | 0.41 |       |
| IPI00550731 | Putative uncharacterized protein                        | K.VQWKVDNALQSGNSQESVTEQDSK.D             | 3 | 6.42 | 0.38 |       |
| IPI00550731 | Putative uncharacterized protein                        | K.VQWKVDNALQSGNSQESVTEQDSKDYLSSTLTLSK.A  | 3 | 5.65 | 0.43 |       |
| IPI00550731 | Putative uncharacterized protein                        | K.VSNRDSGVPDR.F                          | 3 | 3.55 | 0.15 |       |
| IPI00550731 | Putative uncharacterized protein                        | K.VYACEVTHQGLSSPVTK.S                    | 1 | 4.33 | 0.48 |       |
| IPI00550731 | Putative uncharacterized protein                        | K.VYACEVTHQGLSSPVTK.S                    | 2 | 5.40 | 0.48 |       |
| IPI00550731 | Putative uncharacterized protein                        | K.VYACEVTHQGLSSPVTK.S                    | 3 | 4.16 | 0.44 |       |
| IPI00550731 | Putative uncharacterized protein                        | Q.SGNSQESVTEQDSKDYLSSTLTLSK.A            | 3 | 6.25 | 0.52 |       |
| IPI00550731 | Putative uncharacterized protein                        | R.DSGVPDRFSGSGSGDFTLK.I                  | 2 | 4.03 | 0.34 |       |
| IPI00550731 | Putative uncharacterized protein                        | R.DSGVPDRFSGSGSGDFTLK.I                  | 3 | 2.77 | 0.24 |       |
| IPI00550731 | Putative uncharacterized protein                        | R.FSGSGSGDFTLK.I                         | 1 | 2.83 | 0.22 |       |
| IPI00550731 | Putative uncharacterized protein                        | R.FSGSGSGDFTLK.I                         | 2 | 3.86 | 0.19 |       |
| IPI00550731 | Putative uncharacterized protein                        | R.RLIYKVSNR.D                            | 2 | 3.03 | 0.12 |       |
| IPI00550731 | Putative uncharacterized protein                        | R.TVAAPSVF.-                             | 1 | 1.75 | 0.12 |       |
| IPI00550731 | Putative uncharacterized protein                        | R.TVAAPSVFIFPPSDEQLK.S                   | 1 | 3.65 | 0.48 |       |
| IPI00550731 | Putative uncharacterized protein                        | R.TVAAPSVFIFPPSDEQLK.S                   | 2 | 4.89 | 0.48 |       |
| IPI00550731 | Putative uncharacterized protein                        | R.TVAAPSVFIFPPSDEQLK.S                   | 3 | 4.07 | 0.25 |       |
| IPI00550731 | Putative uncharacterized protein                        | R.TVAAPSVFIFPPSDEQLKSGTASVVCLLNFFYPR.E   | 3 | 5.23 | 0.48 |       |
| IPI00550731 | Putative uncharacterized protein                        | V.YACEVTHQGLSSPVTK.S                     | 2 | 5.14 | 0.43 |       |
| IPI00550746 | Nuclear migration protein nudC                          | K.DM*VVDIQR.R                            | 2 | 2.41 | 0.22 | -2.91 |
| IPI00550746 | Nuclear migration protein nudC                          | R.LVSSDPEINTK.K                          | 2 | 2.77 | 0.20 | -2.66 |
| IPI00550792 | Isoform 1 of Bridging integrator 2                      | R.VSETLQEIYSSEWDGHEELK.A                 | 3 | 2.91 | 0.22 | -2.62 |
| IPI00550876 | Protein maestro                                         | R.DSLLIHLQDR.N                           | 2 | 2.10 | 0.19 |       |
| IPI00550906 | Cleavage stimulation factor 64 kDa subunit, tau variant | R.GQVQMSDPR.A                            | 2 | 1.60 | 0.08 | 1.83  |
| IPI00550917 | Twinfilin-2                                             | K.KIEIGDGAELTAEFLYDEVHPK.Q               | 3 | 2.94 | 0.23 | -3.10 |



|             |                                        |                                         |   |      |      |       |
|-------------|----------------------------------------|-----------------------------------------|---|------|------|-------|
| IPI00550949 | Bone morphogenetic protein 7 precursor | R.FDLSKIPEGEAVTAAEFR.I                  | 3 | 3.93 | 0.34 | -2.78 |
| IPI00550949 | Bone morphogenetic protein 7 precursor | R.M*ANVAENSSSDQR.Q                      | 2 | 3.86 | 0.46 | -2.76 |
| IPI00550991 | Alpha-1-antichymotrypsin precursor     | C.HPNSPLDEENLTQENQDR.G                  | 2 | 3.68 | 0.41 | -3.60 |
| IPI00550991 | Alpha-1-antichymotrypsin precursor     | C.HPNSPLDEENLTQENQDR.G                  | 3 | 4.78 | 0.32 | -2.87 |
| IPI00550991 | Alpha-1-antichymotrypsin precursor     | D.YNLNDILLQLGIEEAFTSK.A                 | 3 | 4.11 | 0.40 | -2.20 |
| IPI00550991 | Alpha-1-antichymotrypsin precursor     | F.LM*IIVPTDTQNIFFM*SK.V                 | 2 | 4.46 | 0.43 | -4.35 |
| IPI00550991 | Alpha-1-antichymotrypsin precursor     | H.PNSPLDEENLTQENQDR.G                   | 2 | 4.44 | 0.51 | -3.25 |
| IPI00550991 | Alpha-1-antichymotrypsin precursor     | I.TLLSALVETR.T                          | 2 | 2.96 | 0.22 | -3.43 |
| IPI00550991 | Alpha-1-antichymotrypsin precursor     | K.ADLSGITGAR.N                          | 1 | 2.41 | 0.26 | -4.19 |
| IPI00550991 | Alpha-1-antichymotrypsin precursor     | K.ADLSGITGAR.N                          | 2 | 3.93 | 0.37 | -2.88 |
| IPI00550991 | Alpha-1-antichymotrypsin precursor     | K.AKWEM*PFDPQDTHQSR.F                   | 3 | 2.83 | 0.35 | -3.78 |
| IPI00550991 | Alpha-1-antichymotrypsin precursor     | K.AKWEM*PFDPQDTHQSR.F                   | 4 | 3.30 | 0.25 | -3.09 |
| IPI00550991 | Alpha-1-antichymotrypsin precursor     | K.AKWEMPFDPQDTHQSR.F                    | 3 | 3.64 | 0.23 |       |
| IPI00550991 | Alpha-1-antichymotrypsin precursor     | K.APDKNVIFSPLSISTALAF.L                 | 2 | 3.97 | 0.46 | -7.15 |
| IPI00550991 | Alpha-1-antichymotrypsin precursor     | K.AVLDFVEEGTEASAATAVK.I                 | 1 | 3.45 | 0.44 |       |
| IPI00550991 | Alpha-1-antichymotrypsin precursor     | K.AVLDFVEEGTEASAATAVK.I                 | 2 | 6.55 | 0.55 | -8.75 |
| IPI00550991 | Alpha-1-antichymotrypsin precursor     | K.AVLDFVEEGTEASAATAVK.I                 | 3 | 5.14 | 0.46 | -3.96 |
| IPI00550991 | Alpha-1-antichymotrypsin precursor     | K.AVLDFVEEGTEASAATAVKITLLSALVETR.T      | 3 | 5.35 | 0.50 | -4.92 |
| IPI00550991 | Alpha-1-antichymotrypsin precursor     | K.DLDSQTM*M*VLVNYIFFK.A                 | 2 | 4.51 | 0.46 | -5.62 |
| IPI00550991 | Alpha-1-antichymotrypsin precursor     | K.DLDSQTM*M*VLVNYIFFK.A                 | 3 | 5.07 | 0.51 | -5.23 |
| IPI00550991 | Alpha-1-antichymotrypsin precursor     | K.EQLSLLDR.F                            | 1 | 2.23 | 0.09 |       |
| IPI00550991 | Alpha-1-antichymotrypsin precursor     | K.EQLSLLDR.F                            | 2 | 2.10 | 0.11 | -2.16 |
| IPI00550991 | Alpha-1-antichymotrypsin precursor     | K.EQLSLLDRFTEDAK.R                      | 2 | 4.44 | 0.47 | -7.24 |
| IPI00550991 | Alpha-1-antichymotrypsin precursor     | K.EQLSLLDRFTEDAK.R                      | 3 | 2.85 | 0.33 | -3.54 |
| IPI00550991 | Alpha-1-antichymotrypsin precursor     | K.EQLSLLDRFTEDAKR.L                     | 2 | 3.21 | 0.26 | -3.69 |
| IPI00550991 | Alpha-1-antichymotrypsin precursor     | K.EQLSLLDRFTEDAKR.L                     | 3 | 3.59 | 0.45 | -7.62 |
| IPI00550991 | Alpha-1-antichymotrypsin precursor     | K.EQLSLLDRFTEDAKR.L                     | 4 | 2.43 | 0.28 | -3.88 |
| IPI00550991 | Alpha-1-antichymotrypsin precursor     | K.FSISRDYNLNDILLQLGIEEAFTSK.A           | 3 | 3.56 | 0.35 | -3.34 |
| IPI00550991 | Alpha-1-antichymotrypsin precursor     | K.FSISRDYNLNDILLQLGIEEAFTSKADLSGITGAR.N | 4 | 3.30 | 0.13 | -2.35 |
| IPI00550991 | Alpha-1-antichymotrypsin precursor     | K.ITDLIKDLDSQTM*M*VLVNYIFFK.A           | 3 | 5.21 | 0.48 | -6.31 |
| IPI00550991 | Alpha-1-antichymotrypsin precursor     | K.ITLLSALVETR.T                         | 1 | 2.48 | 0.30 | -3.52 |
| IPI00550991 | Alpha-1-antichymotrypsin precursor     | K.ITLLSALVETR.T                         | 2 | 4.97 | 0.46 | -5.00 |
| IPI00550991 | Alpha-1-antichymotrypsin precursor     | K.ITLLSALVETR.T                         | 3 | 1.69 | 0.14 | -4.11 |
| IPI00550991 | Alpha-1-antichymotrypsin precursor     | K.KLINDYVK.N                            | 1 | 2.22 | 0.18 | -3.69 |
| IPI00550991 | Alpha-1-antichymotrypsin precursor     | K.KLINDYVK.N                            | 2 | 2.96 | 0.18 | -1.08 |
| IPI00550991 | Alpha-1-antichymotrypsin precursor     | K.LINDYVK.N                             | 2 | 2.81 | 0.16 | -2.57 |
| IPI00550991 | Alpha-1-antichymotrypsin precursor     | K.M*EEVEAM*LLPETLK.R                    | 2 | 4.23 | 0.44 | -2.72 |
| IPI00550991 | Alpha-1-antichymotrypsin precursor     | K.M*EEVEAM*LLPETLKR.W                   | 2 | 4.26 | 0.48 | -2.20 |
| IPI00550991 | Alpha-1-antichymotrypsin precursor     | K.M*EEVEAM*LLPETLKR.W                   | 3 | 4.36 | 0.29 | -3.62 |
| IPI00550991 | Alpha-1-antichymotrypsin precursor     | K.M*EEVEAMLLPETLKR.W                    | 3 | 3.63 | 0.18 |       |
| IPI00550991 | Alpha-1-antichymotrypsin precursor     | K.RLYGSEAFATDFQDSAAAK.K                 | 2 | 5.28 | 0.54 | -2.33 |
| IPI00550991 | Alpha-1-antichymotrypsin precursor     | K.RLYGSEAFATDFQDSAAAK.K                 | 3 | 5.40 | 0.47 | -4.36 |

|             |                                    |                                    |   |      |      |       |
|-------------|------------------------------------|------------------------------------|---|------|------|-------|
| IPI00550991 | Alpha-1-antichymotrypsin precursor | K.RLYGSEAFATDFQDSAAAKK.L           | 2 | 4.81 | 0.46 | -3.69 |
| IPI00550991 | Alpha-1-antichymotrypsin precursor | K.RLYGSEAFATDFQDSAAAKK.L           | 3 | 7.17 | 0.55 | -6.97 |
| IPI00550991 | Alpha-1-antichymotrypsin precursor | K.RLYGSEAFATDFQDSAAAKK.L           | 4 | 3.03 | 0.29 | -3.81 |
| IPI00550991 | Alpha-1-antichymotrypsin precursor | K.WEM*PFDPQDTHQSR.F                | 2 | 4.07 | 0.38 |       |
| IPI00550991 | Alpha-1-antichymotrypsin precursor | M.IIVPTDTQNIFFM*SK.V               | 2 | 3.15 | 0.44 | -4.98 |
| IPI00550991 | Alpha-1-antichymotrypsin precursor | N.SPLDEENLTQENQDR.G                | 2 | 5.11 | 0.49 | -4.80 |
| IPI00550991 | Alpha-1-antichymotrypsin precursor | P.NSPLDEENLTQENQDR.G               | 2 | 5.66 | 0.57 | -4.59 |
| IPI00550991 | Alpha-1-antichymotrypsin precursor | P.NSPLDEENLTQENQDR.G               | 3 | 3.68 | 0.30 | -2.54 |
| IPI00550991 | Alpha-1-antichymotrypsin precursor | R.DEELSCTVVVELK.Y                  | 2 | 4.95 | 0.27 | -3.45 |
| IPI00550991 | Alpha-1-antichymotrypsin precursor | R.DSLEFR.E                         | 1 | 1.75 | 0.07 | -3.67 |
| IPI00550991 | Alpha-1-antichymotrypsin precursor | R.DSLEFREIGELYLPK.F                | 3 | 3.49 | 0.19 |       |
| IPI00550991 | Alpha-1-antichymotrypsin precursor | R.DYNLNDILLQLGIEEAFTSK.A           | 2 | 7.13 | 0.63 | -5.42 |
| IPI00550991 | Alpha-1-antichymotrypsin precursor | R.DYNLNDILLQLGIEEAFTSK.A           | 3 | 5.88 | 0.53 | -4.80 |
| IPI00550991 | Alpha-1-antichymotrypsin precursor | R.DYNLNDILLQLGIEEAFTSKADLSGITGAR.N | 3 | 5.24 | 0.54 | -3.92 |
| IPI00550991 | Alpha-1-antichymotrypsin precursor | R.EIGELYLPK.F                      | 1 | 2.57 | 0.20 | -4.36 |
| IPI00550991 | Alpha-1-antichymotrypsin precursor | R.EIGELYLPK.F                      | 2 | 2.19 | 0.12 | -2.54 |
| IPI00550991 | Alpha-1-antichymotrypsin precursor | R.FNRPFLM*IIVPTDTQNIFFM*SK.V       | 2 | 4.29 | 0.51 | -4.13 |
| IPI00550991 | Alpha-1-antichymotrypsin precursor | R.FNRPFLM*IIVPTDTQNIFFM*SK.V       | 3 | 5.41 | 0.37 | -4.70 |
| IPI00550991 | Alpha-1-antichymotrypsin precursor | R.FNRPFLM*IIVPTDTQNIFFMSK.V        | 3 | 3.59 | 0.08 |       |
| IPI00550991 | Alpha-1-antichymotrypsin precursor | R.FNRPFLMIIVPTDTQNIFFM*SK.V        | 3 | 4.05 | 0.14 |       |
| IPI00550991 | Alpha-1-antichymotrypsin precursor | R.FTEDAKR.L                        | 2 | 2.47 | 0.14 | -3.76 |
| IPI00550991 | Alpha-1-antichymotrypsin precursor | R.GKITDLIK.D                       | 2 | 2.76 | 0.15 | -3.06 |
| IPI00550991 | Alpha-1-antichymotrypsin precursor | R.GLASANVDFAFSLYK.H                | 2 | 4.08 | 0.50 |       |
| IPI00550991 | Alpha-1-antichymotrypsin precursor | R.GTHVDLGLASANVDFAFSLYK.Q          | 2 | 4.96 | 0.51 |       |
| IPI00550991 | Alpha-1-antichymotrypsin precursor | R.GTHVDLGLASANVDFAFSLYK.Q          | 3 | 3.29 | 0.34 | -3.68 |
| IPI00550991 | Alpha-1-antichymotrypsin precursor | R.LYGSEAFATDFQDSAAAK.K             | 2 | 6.27 | 0.60 | -8.06 |
| IPI00550991 | Alpha-1-antichymotrypsin precursor | R.LYGSEAFATDFQDSAAAK.K             | 3 | 5.22 | 0.46 | -3.04 |
| IPI00550991 | Alpha-1-antichymotrypsin precursor | R.LYGSEAFATDFQDSAAAKK.L            | 2 | 5.62 | 0.58 | -3.20 |
| IPI00550991 | Alpha-1-antichymotrypsin precursor | R.LYGSEAFATDFQDSAAAKK.L            | 3 | 3.98 | 0.45 | -6.86 |
| IPI00550991 | Alpha-1-antichymotrypsin precursor | R.NLAVSQVVHK.A                     | 1 | 3.21 | 0.28 | -4.64 |
| IPI00550991 | Alpha-1-antichymotrypsin precursor | R.NLAVSQVVHK.A                     | 2 | 3.21 | 0.26 | -3.00 |
| IPI00550991 | Alpha-1-antichymotrypsin precursor | R.NLAVSQVVHKAVLDVFEEGTEASAATAVK.I  | 3 | 5.23 | 0.53 | -5.40 |
| IPI00550991 | Alpha-1-antichymotrypsin precursor | R.NLAVSQVVHKAVLDVFEEGTEASAATAVK.I  | 4 | 4.23 | 0.37 | -4.59 |
| IPI00550991 | Alpha-1-antichymotrypsin precursor | R.TLNQSSDELQLSM*GNAM*FVK.E         | 2 | 5.49 | 0.61 | -2.32 |
| IPI00550991 | Alpha-1-antichymotrypsin precursor | R.TLNQSSDELQLSM*GNAM*FVK.E         | 3 | 4.22 | 0.26 | -1.85 |
| IPI00550991 | Alpha-1-antichymotrypsin precursor | R.WRDSLEFR.E                       | 2 | 2.67 | 0.10 |       |
| IPI00550991 | Alpha-1-antichymotrypsin precursor | Y.NLNDILLQLGIEEAFTSK.A             | 2 | 3.91 | 0.38 | -2.74 |
| IPI00550991 | Alpha-1-antichymotrypsin precursor | Y.NLNDILLQLGIEEAFTSK.A             | 3 | 4.65 | 0.45 | -3.26 |
| IPI00552267 | Similar to V2-13 protein           | -.SELTQDPAVSVALGQTVR.I             | 2 | 4.69 | 0.23 |       |
| IPI00552267 | Similar to V2-13 protein           | -.SELTQDPAVSVALGQTVR.I             | 3 | 5.07 | 0.32 |       |
| IPI00552267 | Similar to V2-13 protein           | R.FSGSSSGNTASLTITGAQAEDADYYCNSR.D  | 3 | 4.21 | 0.32 |       |
| IPI00552267 | Similar to V2-13 protein           | R.ITCQGDSLR.G                      | 2 | 2.72 | 0.22 |       |

|             |                                                             |                                          |   |      |      |       |
|-------------|-------------------------------------------------------------|------------------------------------------|---|------|------|-------|
| IPI00552578 | Serum amyloid A protein precursor                           | R.SFFSFLGEAFDGR.D                        | 2 | 4.87 | 0.45 |       |
| IPI00552591 | V1-20 protein                                               | R.NNNRPSGISER.F                          | 3 | 3.14 | 0.30 |       |
| IPI00552735 | V2-8 protein                                                | R.ITCGGNNIGSK.S                          | 2 | 2.81 | 0.18 |       |
| IPI00552771 | V2-11 protein                                               | R.ITCSGEALPK.K                           | 2 | 2.59 | 0.28 |       |
| IPI00552852 | V2-19 protein                                               | -.SYELTQPSSVSVSPGQTAR.I                  | 2 | 5.07 | 0.47 |       |
| IPI00552852 | V2-19 protein                                               | R.ITCSGDVLAK.K                           | 2 | 2.49 | 0.15 |       |
| IPI00552852 | V2-19 protein                                               | S.YELTQPSSVSVSPGQTAR.I                   | 2 | 5.34 | 0.49 |       |
| IPI00552874 | V1-3 protein                                                | R.SVSGSPGQSVTISCTGTSSDVGGYNYVSWYQQHPGK.A | 3 | 3.55 | 0.23 |       |
| IPI00552905 | Isoform 1 of Proline-rich transmembrane protein 3 precursor | F.TQQDPAAPDVGSVPPVEVVYSQEPGAQPDALAR.S    | 3 | 3.59 | 0.33 | -1.61 |
| IPI00552905 | Isoform 1 of Proline-rich transmembrane protein 3 precursor | G.FPRPLENSEIPM*IPGAHPK.G                 | 3 | 3.52 | 0.32 | -1.86 |
| IPI00552905 | Isoform 1 of Proline-rich transmembrane protein 3 precursor | K.GSVGSEPPQAFDVPENPR.A                   | 2 | 4.82 | 0.34 | -3.65 |
| IPI00552905 | Isoform 1 of Proline-rich transmembrane protein 3 precursor | K.GSVGSEPPQAFDVPENPR.A                   | 3 | 4.42 | 0.37 | -3.53 |
| IPI00552905 | Isoform 1 of Proline-rich transmembrane protein 3 precursor | K.GSVGSEPPQAFDVPENPRADS.H                | 2 | 4.55 | 0.42 | -3.81 |
| IPI00552905 | Isoform 1 of Proline-rich transmembrane protein 3 precursor | K.GSVGSEPPQAFDVPENPRADSHR.N              | 4 | 2.89 | 0.17 | -2.71 |
| IPI00552905 | Isoform 1 of Proline-rich transmembrane protein 3 precursor | K.QADLPDAK.D                             | 1 | 1.44 | 0.22 | -2.63 |
| IPI00552905 | Isoform 1 of Proline-rich transmembrane protein 3 precursor | P.AAPDVGSVPPVEVVYSQEPGAQPDALAR.S         | 3 | 3.88 | 0.34 | -1.37 |
| IPI00552905 | Isoform 1 of Proline-rich transmembrane protein 3 precursor | P.LENSEIPM*IPGAHPK.G                     | 2 | 4.48 | 0.30 | -3.97 |
| IPI00552905 | Isoform 1 of Proline-rich transmembrane protein 3 precursor | P.LENSEIPM*IPGAHPK.G                     | 3 | 3.88 | 0.31 | -4.05 |
| IPI00552905 | Isoform 1 of Proline-rich transmembrane protein 3 precursor | R.AAM*NGADPISPQR.V                       | 2 | 3.28 | 0.42 | -3.07 |
| IPI00552905 | Isoform 1 of Proline-rich transmembrane protein 3 precursor | R.GFPRPLENSEIPM*IPGAHPK.G                | 3 | 3.70 | 0.21 | -2.06 |
| IPI00552905 | Isoform 1 of Proline-rich transmembrane protein 3 precursor | R.HAPAEEM*PEKPVASPLGPALYGP.K.A           | 3 | 3.42 | 0.30 | -3.24 |
| IPI00552905 | Isoform 1 of Proline-rich transmembrane protein 3 precursor | R.SLPPAEELPVETPK.R                       | 2 | 2.54 | 0.36 | -5.60 |
| IPI00552905 | Isoform 1 of Proline-rich transmembrane protein 3 precursor | R.SLPPAEELPVETPKR.A                      | 2 | 3.30 | 0.47 | -3.12 |
| IPI00552905 | Isoform 1 of Proline-rich transmembrane protein 3 precursor | R.VRGAVEAPGTPK.S                         | 2 | 1.94 | 0.19 | -2.19 |
| IPI00552937 | NHL repeat containing 3 isoform a                           | K.FNIPHSVTLDSAGR.V                       | 3 | 3.55 | 0.24 | -3.07 |
| IPI00552937 | NHL repeat containing 3 isoform a                           | R.LSVVAAPPVGSIGECVISTIQLADQVLPILLEVD.R.K | 3 | 2.73 | 0.30 | -3.25 |

|             |                                                      |                                       |   |      |      |       |
|-------------|------------------------------------------------------|---------------------------------------|---|------|------|-------|
| IPI00552939 | Isoform 1 of Complement C1q-like protein 3 precursor | R.ASAIAQDADQNYDYASNSVVLHLEPGDEVYIK.L  | 3 | 5.57 | 0.51 | -3.06 |
| IPI00552939 | Isoform 1 of Complement C1q-like protein 3 precursor | R.GLM*QSLPTFIQGP.K                    | 2 | 3.81 | 0.31 | -2.34 |
| IPI00552943 | V1-11 protein                                        | K.LLIYYDILLPSGVSDR.F                  | 2 | 2.95 | 0.14 |       |
| IPI00552943 | V1-11 protein                                        | R.VTISCSGSSSNIGNNAVNWYQQLPGKAPK.L     | 3 | 5.60 | 0.47 |       |
| IPI00553092 | V3-3 protein                                         | R.FSGSLLGGK.A                         | 2 | 2.88 | 0.08 |       |
| IPI00553138 | Vesicle-associated membrane protein 2                | K.LSELDDR.A                           | 2 | 2.23 | 0.08 | -3.30 |
| IPI00553138 | Vesicle-associated membrane protein 2                | R.LQQTQAQVDEVVDIM*R.V                 | 2 | 5.50 | 0.53 | -1.44 |
| IPI00553138 | Vesicle-associated membrane protein 2                | R.VNVDKVLER.D                         | 2 | 2.87 | 0.30 | -2.89 |
| IPI00553177 | Isoform 1 of Alpha-1-antitrypsin precursor           | F.SNGADLSGVTEEAAPLKLSK.A              | 2 | 5.03 | 0.34 |       |
| IPI00553177 | Isoform 1 of Alpha-1-antitrypsin precursor           | G.DAAQKTDTSHHQDHPKFNK.I               | 3 | 5.78 | 0.31 |       |
| IPI00553177 | Isoform 1 of Alpha-1-antitrypsin precursor           | G.DAAQKTDTSHHQDHPKFNKIPNLAFAFSLYR.Q   | 3 | 5.60 | 0.38 |       |
| IPI00553177 | Isoform 1 of Alpha-1-antitrypsin precursor           | K.AVLTIDEK.G                          | 1 | 2.55 | 0.16 |       |
| IPI00553177 | Isoform 1 of Alpha-1-antitrypsin precursor           | K.AVLTIDEK.G                          | 2 | 2.64 | 0.10 |       |
| IPI00553177 | Isoform 1 of Alpha-1-antitrypsin precursor           | K.AVLTIDEKGTAAAGAM*FLEAIPM*SIPPEVK.F  | 2 | 2.40 | 0.30 |       |
| IPI00553177 | Isoform 1 of Alpha-1-antitrypsin precursor           | K.AVLTIDEKGTAAAGAM*FLEAIPM*SIPPEVK.F  | 3 | 3.77 | 0.36 |       |
| IPI00553177 | Isoform 1 of Alpha-1-antitrypsin precursor           | K.AVLTIDEKGTAAAGAMFLEAIPM*SIPPEVK.F   | 3 | 4.65 | 0.29 |       |
| IPI00553177 | Isoform 1 of Alpha-1-antitrypsin precursor           | K.AVLTIDEKGTAAAGAMFLEAIPMSIPPEVK.F    | 3 | 3.60 | 0.17 |       |
| IPI00553177 | Isoform 1 of Alpha-1-antitrypsin precursor           | K.DTEEDDFHVDQVTTVK.V                  | 2 | 5.39 | 0.31 |       |
| IPI00553177 | Isoform 1 of Alpha-1-antitrypsin precursor           | K.DTEEDDFHVDQVTTVK.V                  | 3 | 2.94 | 0.28 |       |
| IPI00553177 | Isoform 1 of Alpha-1-antitrypsin precursor           | K.DTEEDDFHVDQVTTVKVPM*M*K.R           | 2 | 4.67 | 0.36 |       |
| IPI00553177 | Isoform 1 of Alpha-1-antitrypsin precursor           | K.DTEEDDFHVDQVTTVKVPM*M*K.R           | 3 | 5.62 | 0.42 |       |
| IPI00553177 | Isoform 1 of Alpha-1-antitrypsin precursor           | K.DTEEDDFHVDQVTTVKVPM*M*KR.L          | 3 | 4.37 | 0.31 |       |
| IPI00553177 | Isoform 1 of Alpha-1-antitrypsin precursor           | K.DTEEDDFHVDQVTTVKVPM*MK.R            | 3 | 4.52 | 0.06 |       |
| IPI00553177 | Isoform 1 of Alpha-1-antitrypsin precursor           | K.DTEEDDFHVDQVTTVKVPM*M*K.R           | 3 | 5.82 | 0.05 |       |
| IPI00553177 | Isoform 1 of Alpha-1-antitrypsin precursor           | K.ELDRDTVFALVNYIFFK.G                 | 2 | 5.17 | 0.47 |       |
| IPI00553177 | Isoform 1 of Alpha-1-antitrypsin precursor           | K.ELDRDTVFALVNYIFFK.G                 | 3 | 5.47 | 0.40 |       |
| IPI00553177 | Isoform 1 of Alpha-1-antitrypsin precursor           | K.FNKPFVFLM*IEQNTK.S                  | 1 | 3.49 | 0.16 |       |
| IPI00553177 | Isoform 1 of Alpha-1-antitrypsin precursor           | K.FNKPFVFLM*IEQNTK.S                  | 2 | 4.99 | 0.32 |       |
| IPI00553177 | Isoform 1 of Alpha-1-antitrypsin precursor           | K.FNKPFVFLM*IEQNTK.S                  | 3 | 4.26 | 0.22 | -4.08 |
| IPI00553177 | Isoform 1 of Alpha-1-antitrypsin precursor           | K.FNKPFVFLM*IEQNTKSPLFM*GK.V          | 2 | 4.41 | 0.43 |       |
| IPI00553177 | Isoform 1 of Alpha-1-antitrypsin precursor           | K.FNKPFVFLM*IEQNTKSPLFM*GK.V          | 3 | 4.08 | 0.25 |       |
| IPI00553177 | Isoform 1 of Alpha-1-antitrypsin precursor           | K.FNKPFVFLMIEQNTK.S                   | 2 | 5.36 | 0.30 |       |
| IPI00553177 | Isoform 1 of Alpha-1-antitrypsin precursor           | K.FNKPFVFLMIEQNTK.S                   | 3 | 6.08 | 0.21 |       |
| IPI00553177 | Isoform 1 of Alpha-1-antitrypsin precursor           | K.GKWERPFEVKDTEEDDFHVDQVTTVK.V        | 3 | 7.70 | 0.39 |       |
| IPI00553177 | Isoform 1 of Alpha-1-antitrypsin precursor           | K.GKWERPFEVKDTEEDDFHVDQVTTVKVPM*M*K.R | 3 | 4.65 | 0.22 |       |
| IPI00553177 | Isoform 1 of Alpha-1-antitrypsin precursor           | K.GTEAAGAM*FLEAIPM*SIPPEVK.F          | 2 | 4.87 | 0.47 |       |
| IPI00553177 | Isoform 1 of Alpha-1-antitrypsin precursor           | K.GTEAAGAM*FLEAIPM*SIPPEVK.F          | 3 | 3.89 | 0.27 |       |
| IPI00553177 | Isoform 1 of Alpha-1-antitrypsin precursor           | K.GTEAAGAM*FLEAIPMSIPPEVK.F           | 2 | 4.75 | 0.35 |       |
| IPI00553177 | Isoform 1 of Alpha-1-antitrypsin precursor           | K.GTEAAGAMFLEAIPM*SIPPEVK.F           | 2 | 4.44 | 0.51 |       |
| IPI00553177 | Isoform 1 of Alpha-1-antitrypsin precursor           | K.GTEAAGAMFLEAIPM*SIPPEVK.F           | 3 | 4.25 | 0.34 |       |

|             |                                            |                                     |   |      |      |       |
|-------------|--------------------------------------------|-------------------------------------|---|------|------|-------|
| IPI00553177 | Isoform 1 of Alpha-1-antitrypsin precursor | K.GTEAAGAMFLEAIPMSIPPEVK.F          | 2 | 4.16 | 0.45 |       |
| IPI00553177 | Isoform 1 of Alpha-1-antitrypsin precursor | K.GTEAAGAMFLEAIPMSIPPEVK.F          | 3 | 3.12 | 0.19 |       |
| IPI00553177 | Isoform 1 of Alpha-1-antitrypsin precursor | K.ITPNLAEFASFSLYR.Q                 | 1 | 3.23 | 0.22 |       |
| IPI00553177 | Isoform 1 of Alpha-1-antitrypsin precursor | K.ITPNLAEFASFSLYR.Q                 | 2 | 4.39 | 0.36 | -3.75 |
| IPI00553177 | Isoform 1 of Alpha-1-antitrypsin precursor | K.ITPNLAEFASFSLYR.Q                 | 3 | 3.09 | 0.21 | -2.19 |
| IPI00553177 | Isoform 1 of Alpha-1-antitrypsin precursor | K.IVDLVKELDR.D                      | 2 | 3.79 | 0.18 |       |
| IPI00553177 | Isoform 1 of Alpha-1-antitrypsin precursor | K.IVDLVKELDRDTVFALVNYIFFK.G         | 3 | 6.67 | 0.53 |       |
| IPI00553177 | Isoform 1 of Alpha-1-antitrypsin precursor | K.KLSSWVLLM*K.Y                     | 1 | 2.10 | 0.11 |       |
| IPI00553177 | Isoform 1 of Alpha-1-antitrypsin precursor | K.KLSSWVLLM*K.Y                     | 2 | 3.32 | 0.29 |       |
| IPI00553177 | Isoform 1 of Alpha-1-antitrypsin precursor | K.KLSSWVLLM*K.Y                     | 3 | 3.43 | 0.13 |       |
| IPI00553177 | Isoform 1 of Alpha-1-antitrypsin precursor | K.KLSSWVLLMK.Y                      | 2 | 3.10 | 0.20 |       |
| IPI00553177 | Isoform 1 of Alpha-1-antitrypsin precursor | K.KLYHSEAFVNFQDTEEAKK.Q             | 3 | 6.64 | 0.38 |       |
| IPI00553177 | Isoform 1 of Alpha-1-antitrypsin precursor | K.KLYHSEAFVNFQDTEEAKKQINDYVEK.G     | 3 | 6.91 | 0.51 |       |
| IPI00553177 | Isoform 1 of Alpha-1-antitrypsin precursor | K.KQINDYVEK.G                       | 1 | 2.81 | 0.10 |       |
| IPI00553177 | Isoform 1 of Alpha-1-antitrypsin precursor | K.KQINDYVEK.G                       | 2 | 2.78 | 0.11 |       |
| IPI00553177 | Isoform 1 of Alpha-1-antitrypsin precursor | K.KQINDYVEKGTQGK.I                  | 2 | 4.59 | 0.36 |       |
| IPI00553177 | Isoform 1 of Alpha-1-antitrypsin precursor | K.KQINDYVEKGTQGK.I                  | 3 | 4.36 | 0.24 |       |
| IPI00553177 | Isoform 1 of Alpha-1-antitrypsin precursor | K.LQHLENELTHDIITK.F                 | 2 | 4.91 | 0.26 |       |
| IPI00553177 | Isoform 1 of Alpha-1-antitrypsin precursor | K.LQHLENELTHDIITK.F                 | 3 | 4.65 | 0.32 |       |
| IPI00553177 | Isoform 1 of Alpha-1-antitrypsin precursor | K.LSITGTYDLK.S                      | 1 | 2.18 | 0.13 |       |
| IPI00553177 | Isoform 1 of Alpha-1-antitrypsin precursor | K.LSITGTYDLK.S                      | 2 | 3.21 | 0.25 |       |
| IPI00553177 | Isoform 1 of Alpha-1-antitrypsin precursor | K.LSITGTYDLKSVLQGLGITK.V            | 2 | 4.54 | 0.42 |       |
| IPI00553177 | Isoform 1 of Alpha-1-antitrypsin precursor | K.LSITGTYDLKSVLQGLGITK.V            | 3 | 4.52 | 0.35 |       |
| IPI00553177 | Isoform 1 of Alpha-1-antitrypsin precursor | K.LSSWVLLM*K.Y                      | 2 | 2.65 | 0.13 | -2.21 |
| IPI00553177 | Isoform 1 of Alpha-1-antitrypsin precursor | K.LSSWVLLMK.Y                       | 2 | 2.59 | 0.22 |       |
| IPI00553177 | Isoform 1 of Alpha-1-antitrypsin precursor | K.LVDKFLEDVK.K                      | 2 | 3.16 | 0.15 |       |
| IPI00553177 | Isoform 1 of Alpha-1-antitrypsin precursor | K.LVDKFLEDVKK.L                     | 1 | 3.49 | 0.08 |       |
| IPI00553177 | Isoform 1 of Alpha-1-antitrypsin precursor | K.LVDKFLEDVKK.L                     | 2 | 3.65 | 0.21 |       |
| IPI00553177 | Isoform 1 of Alpha-1-antitrypsin precursor | K.LVDKFLEDVKK.L                     | 3 | 4.42 | 0.27 |       |
| IPI00553177 | Isoform 1 of Alpha-1-antitrypsin precursor | K.LYHSEAFVNFQDTEEAK.K               | 2 | 5.72 | 0.52 |       |
| IPI00553177 | Isoform 1 of Alpha-1-antitrypsin precursor | K.LYHSEAFVNFQDTEEAK.K               | 3 | 3.87 | 0.13 |       |
| IPI00553177 | Isoform 1 of Alpha-1-antitrypsin precursor | K.LYHSEAFVNFQDTEEAKK.Q              | 2 | 6.73 | 0.51 |       |
| IPI00553177 | Isoform 1 of Alpha-1-antitrypsin precursor | K.LYHSEAFVNFQDTEEAKK.Q              | 3 | 5.18 | 0.46 |       |
| IPI00553177 | Isoform 1 of Alpha-1-antitrypsin precursor | K.LYHSEAFVNFQDTEEAKKQINDYVEK.G      | 2 | 5.11 | 0.45 |       |
| IPI00553177 | Isoform 1 of Alpha-1-antitrypsin precursor | K.LYHSEAFVNFQDTEEAKKQINDYVEK.G      | 3 | 6.73 | 0.52 |       |
| IPI00553177 | Isoform 1 of Alpha-1-antitrypsin precursor | K.LYHSEAFVNFQDTEEAKKQINDYVEKGTQGK.I | 3 | 6.77 | 0.47 |       |
| IPI00553177 | Isoform 1 of Alpha-1-antitrypsin precursor | K.QINDYVEK.G                        | 1 | 2.02 | 0.15 |       |
| IPI00553177 | Isoform 1 of Alpha-1-antitrypsin precursor | K.QINDYVEKGTQGK.I                   | 1 | 3.42 | 0.39 |       |
| IPI00553177 | Isoform 1 of Alpha-1-antitrypsin precursor | K.QINDYVEKGTQGK.I                   | 2 | 3.15 | 0.30 |       |
| IPI00553177 | Isoform 1 of Alpha-1-antitrypsin precursor | K.SPLFM*GKVVNPTQK.-                 | 3 | 3.16 | 0.26 |       |
| IPI00553177 | Isoform 1 of Alpha-1-antitrypsin precursor | K.SPLFMGK.V                         | 1 | 2.16 | 0.11 |       |
| IPI00553177 | Isoform 1 of Alpha-1-antitrypsin precursor | K.SVLQGLGITK.V                      | 2 | 3.58 | 0.30 |       |

|             |                                                               |                                             |   |      |      |       |
|-------------|---------------------------------------------------------------|---------------------------------------------|---|------|------|-------|
| IPI00553177 | Isoform 1 of Alpha-1-antitrypsin precursor                    | K.SVLGQLGITKVFNSGADLSGVTEEAPLK.L            | 3 | 3.72 | 0.27 |       |
| IPI00553177 | Isoform 1 of Alpha-1-antitrypsin precursor                    | K.SVLGQLGITKVFNSGADLSGVTEEAPLKLSK.A         | 2 | 4.59 | 0.35 |       |
| IPI00553177 | Isoform 1 of Alpha-1-antitrypsin precursor                    | K.SVLGQLGITKVFNSGADLSGVTEEAPLKLSK.A         | 3 | 7.31 | 0.51 |       |
| IPI00553177 | Isoform 1 of Alpha-1-antitrypsin precursor                    | K.TDTSHHDDQDHPTFNK.I                        | 2 | 3.82 | 0.33 |       |
| IPI00553177 | Isoform 1 of Alpha-1-antitrypsin precursor                    | K.TDTSHHDDQDHPTFNK.I                        | 3 | 4.17 | 0.37 |       |
| IPI00553177 | Isoform 1 of Alpha-1-antitrypsin precursor                    | K.TDTSHHDDQDHPTFNKITPNLAFAFSLYR.Q           | 3 | 6.24 | 0.44 |       |
| IPI00553177 | Isoform 1 of Alpha-1-antitrypsin precursor                    | K.VFSNGADLSGVTEEAPLK.L                      | 1 | 3.41 | 0.28 |       |
| IPI00553177 | Isoform 1 of Alpha-1-antitrypsin precursor                    | K.VFSNGADLSGVTEEAPLK.L                      | 2 | 6.24 | 0.40 |       |
| IPI00553177 | Isoform 1 of Alpha-1-antitrypsin precursor                    | K.VFSNGADLSGVTEEAPLK.L                      | 3 | 4.89 | 0.37 |       |
| IPI00553177 | Isoform 1 of Alpha-1-antitrypsin precursor                    | K.VFSNGADLSGVTEEAPLKLSK.A                   | 2 | 5.38 | 0.48 |       |
| IPI00553177 | Isoform 1 of Alpha-1-antitrypsin precursor                    | K.VFSNGADLSGVTEEAPLKLSK.A                   | 3 | 2.73 | 0.23 | -2.70 |
| IPI00553177 | Isoform 1 of Alpha-1-antitrypsin precursor                    | K.VFSNGADLSGVTEEAPLKLSKAVHK.A               | 3 | 3.97 | 0.23 |       |
| IPI00553177 | Isoform 1 of Alpha-1-antitrypsin precursor                    | K.YLGNATAIFFLPDEGKLQHLENELTHDIITK.F         | 2 | 2.97 | 0.18 |       |
| IPI00553177 | Isoform 1 of Alpha-1-antitrypsin precursor                    | K.YLGNATAIFFLPDEGKLQHLENELTHDIITK.F         | 3 | 4.89 | 0.35 |       |
| IPI00553177 | Isoform 1 of Alpha-1-antitrypsin precursor                    | L.PDEGKLQHLENELTHDIITK.F                    | 2 | 5.25 | 0.44 |       |
| IPI00553177 | Isoform 1 of Alpha-1-antitrypsin precursor                    | Q.PDSQLQLTTGNGLFLSEGLK.L                    | 2 | 5.30 | 0.40 |       |
| IPI00553177 | Isoform 1 of Alpha-1-antitrypsin precursor                    | R.DTVFALVNIYFFK.G                           | 2 | 4.02 | 0.34 |       |
| IPI00553177 | Isoform 1 of Alpha-1-antitrypsin precursor                    | R.LGM*FNIQHCK.K                             | 1 | 1.94 | 0.10 |       |
| IPI00553177 | Isoform 1 of Alpha-1-antitrypsin precursor                    | R.LGM*FNIQHCK.K                             | 2 | 2.97 | 0.05 |       |
| IPI00553177 | Isoform 1 of Alpha-1-antitrypsin precursor                    | R.LGMFNIQHCK.K                              | 2 | 2.65 | 0.23 |       |
| IPI00553177 | Isoform 1 of Alpha-1-antitrypsin precursor                    | R.LGMFNIQHCK.K                              | 3 | 2.14 | 0.22 |       |
| IPI00553177 | Isoform 1 of Alpha-1-antitrypsin precursor                    | R.SASLHLPK.L                                | 2 | 2.87 | 0.20 |       |
| IPI00553177 | Isoform 1 of Alpha-1-antitrypsin precursor                    | R.SASLHLPKLSITGYDLK.S                       | 2 | 3.74 | 0.31 |       |
| IPI00553177 | Isoform 1 of Alpha-1-antitrypsin precursor                    | R.SASLHLPKLSITGYDLK.S                       | 3 | 4.87 | 0.38 |       |
| IPI00553177 | Isoform 1 of Alpha-1-antitrypsin precursor                    | R.TLNQPDSQLQLTTGNGLFLSEGLK.L                | 2 | 5.89 | 0.51 |       |
| IPI00553177 | Isoform 1 of Alpha-1-antitrypsin precursor                    | R.TLNQPDSQLQLTTGNGLFLSEGLK.L                | 3 | 5.91 | 0.50 |       |
| IPI00553177 | Isoform 1 of Alpha-1-antitrypsin precursor                    | R.TLNQPDSQLQLTTGNGLFLSEGLKLVDK.F            | 2 | 3.70 | 0.38 |       |
| IPI00553177 | Isoform 1 of Alpha-1-antitrypsin precursor                    | R.TLNQPDSQLQLTTGNGLFLSEGLKLVDK.F            | 3 | 4.15 | 0.47 |       |
| IPI00553177 | Isoform 1 of Alpha-1-antitrypsin precursor                    | R.TLNQPDSQLQLTTGNGLFLSEGLKLVDFLEDVK.K       | 3 | 6.33 | 0.53 |       |
| IPI00553177 | Isoform 1 of Alpha-1-antitrypsin precursor                    | R.TLNQPDSQLQLTTGNGLFLSEGLKLVDFLEDVKK.L      | 3 | 7.30 | 0.53 |       |
| IPI00553177 | Isoform 1 of Alpha-1-antitrypsin precursor                    | V.FSNGADLSGVTEEAPLKLSK.A                    | 2 | 5.25 | 0.41 |       |
| IPI00553177 | Isoform 1 of Alpha-1-antitrypsin precursor                    | W.ERPFEVKDTEEDFHVQVTTVK.V                   | 3 | 6.25 | 0.37 |       |
| IPI00554474 | Hypothetical LOC284297                                        | R.QALLLGLTQLVEAAR.G                         | 2 | 4.69 | 0.51 | -4.28 |
| IPI00554474 | Hypothetical LOC284297                                        | R.QALLLGLTQLVEAAR.G                         | 3 | 3.18 | 0.37 | -3.59 |
| IPI00554521 | Ferritin heavy chain                                          | K.AI KELGDHVTNLR.K                          | 2 | 2.40 | 0.18 | -3.58 |
| IPI00554752 | cAMP-dependent protein kinase type II-beta regulatory subunit | K.GTARFGHEGRTWGD LGAAAGGGTPSK.G             | 3 | 3.14 | 0.12 |       |
| IPI00554752 | cAMP-dependent protein kinase type II-beta regulatory subunit | R.NIATYEEQLVALFGTNMDIVEPTA.-                | 2 | 2.25 | 0.17 | -1.87 |
| IPI00554786 | Thioredoxin reductase 1, cytoplasmic precursor                | K.FGEENIEVYHSYFWPLEWTIPSR.D                 | 3 | 5.40 | 0.37 | -4.20 |
| IPI00554786 | Thioredoxin reductase 1, cytoplasmic precursor                | K.TGKIPVTDEEQTNVPYIYAIGDILEDKVELTPVAIQAGR.L | 4 | 3.61 | 0.26 | -3.09 |
| IPI00554786 | Thioredoxin reductase 1, cytoplasmic precursor                | R.GFDQDM*ANK.I                              | 2 | 2.10 | 0.06 | -3.34 |

|             |                                                                 |                                     |   |      |      |       |
|-------------|-----------------------------------------------------------------|-------------------------------------|---|------|------|-------|
| IPI00554786 | Thioredoxin reductase 1, cytoplasmic precursor                  | R.VVGFHVLGPNAGEVTQGFAAALK.C         | 3 | 3.85 | 0.34 | -3.01 |
| IPI00554799 | shadow of prion protein                                         | R.YGAPGSSLR.V                       | 2 | 2.30 | 0.28 | -1.53 |
| IPI00555600 | Solute carrier family 26, member 1 isoform a variant (Fragment) | P.AEAPHLVQVDAAR.A                   | 3 | 3.53 | 0.26 | -2.65 |
| IPI00555614 | Heat shock protein 90Bc                                         | R.DNSTM*GYM*M*AK.K                  | 2 | 2.95 | 0.41 | -2.80 |
| IPI00555693 | Isoform 3 of Testican-3 precursor                               | A.AAAAVAAAGGR.S                     | 1 | 2.36 | 0.27 | -3.46 |
| IPI00555693 | Isoform 3 of Testican-3 precursor                               | A.AAAAVAAAGGR.S                     | 2 | 3.77 | 0.26 | -3.47 |
| IPI00555693 | Isoform 3 of Testican-3 precursor                               | K.FRDEVEDDYFR.T                     | 3 | 3.83 | 0.20 | -1.11 |
| IPI00555693 | Isoform 3 of Testican-3 precursor                               | K.LEYQACVLGK.Q                      | 1 | 2.05 | 0.34 | -2.86 |
| IPI00555693 | Isoform 3 of Testican-3 precursor                               | K.LEYQACVLGK.Q                      | 2 | 3.61 | 0.33 | -2.22 |
| IPI00555693 | Isoform 3 of Testican-3 precursor                               | R.DEVEDDYFR.T                       | 2 | 2.49 | 0.20 | -3.33 |
| IPI00555693 | Isoform 3 of Testican-3 precursor                               | R.FDTSILPICK.D                      | 2 | 3.18 | 0.27 | -3.82 |
| IPI00555693 | Isoform 3 of Testican-3 precursor                               | R.YGNEVM*GSR.I                      | 2 | 3.04 | 0.20 | -2.47 |
| IPI00555812 | Vitamin D-binding protein precursor                             | A.QKVPTADLEDVPLAEDITNILSK.C         | 3 | 5.64 | 0.48 | -4.24 |
| IPI00555812 | Vitamin D-binding protein precursor                             | C.SQYAYGEK.K                        | 1 | 2.17 | 0.34 | -2.32 |
| IPI00555812 | Vitamin D-binding protein precursor                             | F.PSGTFEQVSQLVK.E                   | 2 | 4.32 | 0.36 | -5.82 |
| IPI00555812 | Vitamin D-binding protein precursor                             | H.LSLLTTLNLR.V                      | 2 | 3.58 | 0.27 | -2.70 |
| IPI00555812 | Vitamin D-binding protein precursor                             | K.AKLDPATPK.E                       | 1 | 1.89 | 0.09 | -3.96 |
| IPI00555812 | Vitamin D-binding protein precursor                             | K.AKLDPATPK.E                       | 2 | 2.63 | 0.15 | -1.61 |
| IPI00555812 | Vitamin D-binding protein precursor                             | K.AKLDPATPKELAK.L                   | 2 | 2.74 | 0.22 | -2.90 |
| IPI00555812 | Vitamin D-binding protein precursor                             | K.AKLDPATPKELAK.L                   | 3 | 1.86 | 0.22 | -1.67 |
| IPI00555812 | Vitamin D-binding protein precursor                             | K.CCESASEDCM*AK.E                   | 2 | 4.18 | 0.58 | -4.71 |
| IPI00555812 | Vitamin D-binding protein precursor                             | K.DPKEYANQFM*WEYSTNYGQAPLSLLVSYTK.S | 3 | 7.16 | 0.60 | -4.21 |
| IPI00555812 | Vitamin D-binding protein precursor                             | K.DPKEYANQFM*WEYSTNYGQAPLSLLVSYTK.S | 4 | 4.86 | 0.46 | -4.33 |
| IPI00555812 | Vitamin D-binding protein precursor                             | K.EDFTSLSLVLYSR.K                   | 2 | 4.06 | 0.40 | -4.59 |
| IPI00555812 | Vitamin D-binding protein precursor                             | K.EDFTSLSLVLYSR.K                   | 3 | 2.48 | 0.19 | -2.04 |
| IPI00555812 | Vitamin D-binding protein precursor                             | K.EFSLGK.E                          | 1 | 2.08 | 0.17 | -3.87 |
| IPI00555812 | Vitamin D-binding protein precursor                             | K.EFSLGKEDFTSLSLVLYSR.K             | 2 | 5.79 | 0.57 | -5.31 |
| IPI00555812 | Vitamin D-binding protein precursor                             | K.EFSLGKEDFTSLSLVLYSR.K             | 3 | 4.76 | 0.49 | -8.62 |
| IPI00555812 | Vitamin D-binding protein precursor                             | K.EFSLGKEDFTSLSLVLYSR.K             | 4 | 3.54 | 0.30 | -4.49 |
| IPI00555812 | Vitamin D-binding protein precursor                             | K.ELPEHTVK.L                        | 1 | 2.09 | 0.16 | -4.95 |
| IPI00555812 | Vitamin D-binding protein precursor                             | K.ELSSFIDK.G                        | 1 | 2.47 | 0.19 | -3.53 |
| IPI00555812 | Vitamin D-binding protein precursor                             | K.ELSSFIDK.G                        | 2 | 2.11 | 0.18 | -3.11 |
| IPI00555812 | Vitamin D-binding protein precursor                             | K.ELSSFIDKQELCADYSENTFTEYK.K        | 2 | 4.39 | 0.59 | -3.45 |
| IPI00555812 | Vitamin D-binding protein precursor                             | K.ELSSFIDKQELCADYSENTFTEYK.K        | 3 | 6.62 | 0.60 | -5.39 |
| IPI00555812 | Vitamin D-binding protein precursor                             | K.ELSSFIDKQELCADYSENTFTEYKK.K       | 3 | 5.36 | 0.46 | -4.13 |
| IPI00555812 | Vitamin D-binding protein precursor                             | K.ELSSFIDKQELCADYSENTFTEYKK.K       | 4 | 3.71 | 0.29 | -3.65 |
| IPI00555812 | Vitamin D-binding protein precursor                             | K.ELSSFIDKQELCADYSENTFTEYKKK.L      | 4 | 3.69 | 0.24 | -5.34 |
| IPI00555812 | Vitamin D-binding protein precursor                             | K.EVVSLEACCAEGADPDCYDTR.T           | 2 | 5.93 | 0.54 | -4.51 |
| IPI00555812 | Vitamin D-binding protein precursor                             | K.EVVSLEACCAEGADPDCYDTR.T           | 3 | 5.87 | 0.48 | -4.77 |
| IPI00555812 | Vitamin D-binding protein precursor                             | K.EYANQFM*WEYSTNYGQAPLSLLVSYTK.S    | 2 | 4.90 | 0.61 | -4.32 |
| IPI00555812 | Vitamin D-binding protein precursor                             | K.EYANQFM*WEYSTNYGQAPLSLLVSYTK.S    | 3 | 7.23 | 0.62 | -8.54 |

|             |                                     |                                               |   |      |      |       |
|-------------|-------------------------------------|-----------------------------------------------|---|------|------|-------|
| IPI00555812 | Vitamin D-binding protein precursor | K.FEDCCQEK.T                                  | 2 | 2.66 | 0.19 | -2.40 |
| IPI00555812 | Vitamin D-binding protein precursor | K.FPSGTFEQVSQLVK.E                            | 2 | 5.03 | 0.45 | -3.83 |
| IPI00555812 | Vitamin D-binding protein precursor | K.GQELCADYSENTFTEYK.K                         | 2 | 5.92 | 0.62 | -2.07 |
| IPI00555812 | Vitamin D-binding protein precursor | K.HLSLLTTLNLR.V                               | 1 | 3.30 | 0.31 | -4.14 |
| IPI00555812 | Vitamin D-binding protein precursor | K.HLSLLTTLNLR.V                               | 2 | 3.67 | 0.45 | -4.95 |
| IPI00555812 | Vitamin D-binding protein precursor | K.HLSLLTTLNLR.V                               | 3 | 2.69 | 0.23 | -4.18 |
| IPI00555812 | Vitamin D-binding protein precursor | K.HQPQEFPTYVEPTNDEICEAFR.K                    | 2 | 4.33 | 0.54 | -2.38 |
| IPI00555812 | Vitamin D-binding protein precursor | K.HQPQEFPTYVEPTNDEICEAFR.K                    | 3 | 5.98 | 0.55 | -2.96 |
| IPI00555812 | Vitamin D-binding protein precursor | K.HQPQEFPTYVEPTNDEICEAFR.D                    | 3 | 3.97 | 0.44 | -4.45 |
| IPI00555812 | Vitamin D-binding protein precursor | K.HQPQEFPTYVEPTNDEICEAFRDKPK.E                | 4 | 2.84 | 0.13 | -4.40 |
| IPI00555812 | Vitamin D-binding protein precursor | K.LAQKVPTADLEDVLPLAEDITNI.L                   | 2 | 4.96 | 0.41 | -5.15 |
| IPI00555812 | Vitamin D-binding protein precursor | K.LAQKVPTADLEDVLPLAEDITNI.L                   | 2 | 3.34 | 0.38 | -3.93 |
| IPI00555812 | Vitamin D-binding protein precursor | K.LAQKVPTADLEDVLPLAEDITNILSK.C                | 2 | 5.63 | 0.60 | -5.25 |
| IPI00555812 | Vitamin D-binding protein precursor | K.LAQKVPTADLEDVLPLAEDITNILSK.C                | 3 | 6.68 | 0.53 | -9.10 |
| IPI00555812 | Vitamin D-binding protein precursor | K.LAQKVPTADLEDVLPLAEDITNILSK.C                | 4 | 6.46 | 0.49 | -6.06 |
| IPI00555812 | Vitamin D-binding protein precursor | K.LCDNLSTK.N                                  | 1 | 2.25 | 0.22 | -3.43 |
| IPI00555812 | Vitamin D-binding protein precursor | K.LCDNLSTK.N                                  | 2 | 2.78 | 0.30 | -3.11 |
| IPI00555812 | Vitamin D-binding protein precursor | K.LCM*AALK.H                                  | 2 | 1.63 | 0.05 | -2.92 |
| IPI00555812 | Vitamin D-binding protein precursor | K.NSKFEDCCQEK.T                               | 2 | 3.07 | 0.26 | -4.03 |
| IPI00555812 | Vitamin D-binding protein precursor | K.NSKFEDCCQEK.T                               | 3 | 2.46 | 0.12 | -1.98 |
| IPI00555812 | Vitamin D-binding protein precursor | K.RSDFASNCCSINSPLYCDSEIDAELK.N                | 3 | 7.03 | 0.55 | -1.40 |
| IPI00555812 | Vitamin D-binding protein precursor | K.RSDFASNCCSINSPLYCDSEIDAELKNIL.-             | 3 | 7.13 | 0.56 | -2.86 |
| IPI00555812 | Vitamin D-binding protein precursor | K.SCESNSPFPVHPGTAECCTK.E                      | 2 | 4.75 | 0.56 | -2.69 |
| IPI00555812 | Vitamin D-binding protein precursor | K.SCESNSPFPVHPGTAECCTK.E                      | 3 | 2.86 | 0.40 | -3.01 |
| IPI00555812 | Vitamin D-binding protein precursor | K.SLGECCDVEDSTTCFNAK.G                        | 2 | 5.76 | 0.55 | -4.13 |
| IPI00555812 | Vitamin D-binding protein precursor | K.SLGECCDVEDSTTCFNAK.G                        | 3 | 3.31 | 0.51 | -4.40 |
| IPI00555812 | Vitamin D-binding protein precursor | K.SYLSM*VGSCCTSASPTVCFLK.E                    | 2 | 5.85 | 0.68 | -4.51 |
| IPI00555812 | Vitamin D-binding protein precursor | K.SYLSM*VGSCCTSASPTVCFLK.E                    | 3 | 6.62 | 0.56 | -4.80 |
| IPI00555812 | Vitamin D-binding protein precursor | K.SYLSM*VGSCCTSASPTVCFLKER.L                  | 3 | 5.00 | 0.50 | -2.26 |
| IPI00555812 | Vitamin D-binding protein precursor | K.SYLSMVGSCCTSASPTVCFLK.E                     | 2 | 5.03 | 0.53 | -4.72 |
| IPI00555812 | Vitamin D-binding protein precursor | K.SYLSMVGSCCTSASPTVCFLK.E                     | 3 | 3.17 | 0.26 | -5.36 |
| IPI00555812 | Vitamin D-binding protein precursor | K.TAM*DVFCVCTYFM*PAAQLPELDPVELPTNK.D          | 3 | 5.51 | 0.55 | -3.05 |
| IPI00555812 | Vitamin D-binding protein precursor | K.TAM*DVFCVCTYFM*PAAQLPELDPVELPTNKDVCDPGNTK.V | 3 | 5.62 | 0.65 | -4.01 |
| IPI00555812 | Vitamin D-binding protein precursor | K.TAM*DVFCVCTYFM*PAAQLPELDPVELPTNKDVCDPGNTK.V | 4 | 4.98 | 0.49 | -5.10 |
| IPI00555812 | Vitamin D-binding protein precursor | K.TSALSAK.K                                   | 1 | 1.41 | 0.10 | -0.16 |
| IPI00555812 | Vitamin D-binding protein precursor | K.VLEPTLK.S                                   | 1 | 1.75 | 0.09 | -2.81 |
| IPI00555812 | Vitamin D-binding protein precursor | K.VLEPTLK.S                                   | 2 | 1.71 | 0.07 | -2.79 |
| IPI00555812 | Vitamin D-binding protein precursor | K.VM*DKYTFELSR.R                              | 1 | 1.27 | 0.08 | -0.97 |
| IPI00555812 | Vitamin D-binding protein precursor | K.VM*DKYTFELSR.R                              | 2 | 3.81 | 0.37 | -4.74 |
| IPI00555812 | Vitamin D-binding protein precursor | K.VM*DKYTFELSR.R                              | 3 | 4.15 | 0.30 | -4.12 |
| IPI00555812 | Vitamin D-binding protein precursor | K.VMDKYTFELSR.R                               | 2 | 2.37 | 0.21 |       |
| IPI00555812 | Vitamin D-binding protein precursor | K.VPTADLEDVLPLAEDITNILSK.C                    | 2 | 5.95 | 0.48 | -6.65 |



|             |                                     |                                        |   |      |      |       |
|-------------|-------------------------------------|----------------------------------------|---|------|------|-------|
| IPI00555812 | Vitamin D-binding protein precursor | K.VPTADLEDVLPLAEDITNILSK.C             | 3 | 5.83 | 0.48 | -6.45 |
| IPI00555812 | Vitamin D-binding protein precursor | K.YTFELSR.R                            | 1 | 2.28 | 0.21 | -2.00 |
| IPI00555812 | Vitamin D-binding protein precursor | K.YTFELSR.R                            | 2 | 2.40 | 0.12 | -2.19 |
| IPI00555812 | Vitamin D-binding protein precursor | L.AEDITNILSK.C                         | 1 | 2.62 | 0.24 | 1.51  |
| IPI00555812 | Vitamin D-binding protein precursor | L.AQKVPTADLEDVLPLAEDITNILSK.C          | 3 | 5.07 | 0.42 | -3.91 |
| IPI00555812 | Vitamin D-binding protein precursor | L.PLAEDITNILSK.C                       | 1 | 3.45 | 0.43 | -3.75 |
| IPI00555812 | Vitamin D-binding protein precursor | L.PLAEDITNILSK.C                       | 2 | 4.88 | 0.55 | -3.84 |
| IPI00555812 | Vitamin D-binding protein precursor | M.PAAQLPELPDVELPTNK.D                  | 3 | 3.63 | 0.31 | -1.23 |
| IPI00555812 | Vitamin D-binding protein precursor | P.TADLEDVLPLAEDITNILSK.C               | 2 | 4.85 | 0.43 | -3.37 |
| IPI00555812 | Vitamin D-binding protein precursor | P.TADLEDVLPLAEDITNILSK.C               | 3 | 3.62 | 0.33 | -5.26 |
| IPI00555812 | Vitamin D-binding protein precursor | R.KDPKEYANQFM*WEYSTNYGQAPLSLLVSYTK.S   | 3 | 4.97 | 0.48 | -3.18 |
| IPI00555812 | Vitamin D-binding protein precursor | R.KDPKEYANQFM*WEYSTNYGQAPLSLLVSYTK.S   | 4 | 3.18 | 0.26 | -4.73 |
| IPI00555812 | Vitamin D-binding protein precursor | R.KFPSGTFEQVSQLVK.E                    | 1 | 2.74 | 0.32 | -4.58 |
| IPI00555812 | Vitamin D-binding protein precursor | R.KFPSGTFEQVSQLVK.E                    | 2 | 5.55 | 0.45 | -6.64 |
| IPI00555812 | Vitamin D-binding protein precursor | R.KFPSGTFEQVSQLVK.E                    | 3 | 3.88 | 0.37 | -6.41 |
| IPI00555812 | Vitamin D-binding protein precursor | R.RTHLPEVFLSK.V                        | 2 | 2.92 | 0.28 | -4.34 |
| IPI00555812 | Vitamin D-binding protein precursor | R.RTHLPEVFLSK.V                        | 3 | 3.19 | 0.29 | -3.98 |
| IPI00555812 | Vitamin D-binding protein precursor | R.SDFASNCCSINSPPLYCDSEIDAELK.N         | 3 | 6.41 | 0.55 | -4.51 |
| IPI00555812 | Vitamin D-binding protein precursor | R.SDFASNCCSINSPPLYCDSEIDAELKNIL.-      | 2 | 3.53 | 0.46 | -3.31 |
| IPI00555812 | Vitamin D-binding protein precursor | R.SDFASNCCSINSPPLYCDSEIDAELKNIL.-      | 3 | 5.34 | 0.47 | -3.71 |
| IPI00555812 | Vitamin D-binding protein precursor | R.THLPEVFLSK.V                         | 1 | 3.00 | 0.35 | -5.20 |
| IPI00555812 | Vitamin D-binding protein precursor | R.THLPEVFLSK.V                         | 2 | 3.04 | 0.37 | -4.31 |
| IPI00555812 | Vitamin D-binding protein precursor | R.VCSQYAAAYGEK.K                       | 1 | 2.56 | 0.40 | -3.55 |
| IPI00555812 | Vitamin D-binding protein precursor | R.VCSQYAAAYGEK.K                       | 2 | 3.71 | 0.34 | -3.48 |
| IPI00555812 | Vitamin D-binding protein precursor | V.LPLAEDITNILSK.C                      | 2 | 3.70 | 0.51 | -7.71 |
| IPI00555812 | Vitamin D-binding protein precursor | V.PTADLEDVLPLAEDITNILSK.C              | 2 | 4.92 | 0.54 | -2.54 |
| IPI00555812 | Vitamin D-binding protein precursor | V.PTADLEDVLPLAEDITNILSK.C              | 3 | 3.64 | 0.27 | -2.82 |
| IPI00555812 | Vitamin D-binding protein precursor | W.EYSTNYGQAPLSLLVSYTK.S                | 2 | 4.95 | 0.55 | -5.00 |
| IPI00555812 | Vitamin D-binding protein precursor | W.EYSTNYGQAPLSLLVSYTK.S                | 3 | 4.54 | 0.44 | -3.31 |
| IPI00555812 | Vitamin D-binding protein precursor | Y.FM*PAAQLPELPDVELPTNK.D               | 2 | 2.96 | 0.25 | -1.08 |
| IPI00555812 | Vitamin D-binding protein precursor | Y.STNYGQAPLSLLVSYTK.S                  | 2 | 4.21 | 0.52 | -4.01 |
| IPI00556287 | Putative uncharacterized protein    | K.RTVAAPSVFIFPPSDEQLK.S                | 2 | 5.74 | 0.42 |       |
| IPI00556287 | Putative uncharacterized protein    | K.RTVAAPSVFIFPPSDEQLK.S                | 3 | 4.14 | 0.22 |       |
| IPI00556287 | Putative uncharacterized protein    | K.SGTASVVCLLNNFYPR.E                   | 1 | 4.08 | 0.39 |       |
| IPI00556287 | Putative uncharacterized protein    | K.SGTASVVCLLNNFYPR.E                   | 2 | 3.05 | 0.36 | -5.56 |
| IPI00556287 | Putative uncharacterized protein    | K.SGTASVVCLLNNFYPR.E                   | 3 | 4.63 | 0.31 |       |
| IPI00556287 | Putative uncharacterized protein    | R.TVAAPSVF.-                           | 1 | 1.75 | 0.12 |       |
| IPI00556287 | Putative uncharacterized protein    | R.TVAAPSVFIFPPSDEQLK.S                 | 1 | 3.65 | 0.48 |       |
| IPI00556287 | Putative uncharacterized protein    | R.TVAAPSVFIFPPSDEQLK.S                 | 2 | 4.89 | 0.48 |       |
| IPI00556287 | Putative uncharacterized protein    | R.TVAAPSVFIFPPSDEQLK.S                 | 3 | 4.07 | 0.25 |       |
| IPI00556287 | Putative uncharacterized protein    | R.TVAAPSVFIFPPSDEQLKSGTASVVCLLNNFYPR.E | 3 | 5.23 | 0.48 |       |
| IPI00556391 | Actin-like protein (Fragment)       | K.IWHHTFYNELR.V                        | 2 | 2.86 | 0.27 | -2.07 |

|             |                                                           |                                       |   |      |      |       |
|-------------|-----------------------------------------------------------|---------------------------------------|---|------|------|-------|
| IPI00556391 | Actin-like protein (Fragment)                             | L.TTGIVMDSGNGVTHTAIYEWYALPHAILR.L     | 3 | 3.64 | 0.17 | -7.12 |
| IPI00556391 | Actin-like protein (Fragment)                             | R.VAPEEHPVLLTEAPLNPK.A                | 2 | 4.61 | 0.42 | -3.92 |
| IPI00556391 | Actin-like protein (Fragment)                             | R.VAPEEHPVLLTEAPLNPK.A                | 3 | 4.70 | 0.09 | -2.73 |
| IPI00556643 | Semaphorin 3F variant                                     | R.SAEAPQSPAVYAR.I                     | 2 | 3.03 | 0.21 | -3.08 |
| IPI00604430 | Isoform 2 of Receptor expression-enhancing protein 2      | R.LRPSPGSLLDITIEDLGDDPALSRL.S         | 3 | 5.00 | 0.51 | -3.72 |
| IPI00604551 | Isoform 1 of Cell division cycle-associated protein 7     | K.RALNIKQNKAM*LAKLMSELESFPGSFR.G      | 3 | 2.98 | 0.10 | -6.18 |
| IPI00604599 | Transmembrane emp24 domain-containing protein 3 precursor | G.AELTFELPDNAK.Q                      | 2 | 3.13 | 0.14 | -3.62 |
| IPI00604763 | Transmembrane protein 66 precursor                        | R.RLDPIPQLK.C                         | 2 | 1.88 | 0.17 | -1.06 |
| IPI00607580 | multiple EGF-like-domains 8                               | K.APQTVELPAVAGHTLTAR.R                | 2 | 4.79 | 0.51 | -3.63 |
| IPI00607580 | multiple EGF-like-domains 8                               | K.APQTVELPAVAGHTLTAR.R                | 3 | 4.05 | 0.45 | -2.13 |
| IPI00607580 | multiple EGF-like-domains 8                               | K.CESCLQGYFLLDGK.C                    | 2 | 5.16 | 0.59 | -3.31 |
| IPI00607580 | multiple EGF-like-domains 8                               | K.ELQM*SKGEPK.K                       | 2 | 2.20 | 0.18 | -3.00 |
| IPI00607580 | multiple EGF-like-domains 8                               | K.LDGGQLVWETLM*DSR.L                  | 2 | 4.35 | 0.43 | -4.24 |
| IPI00607580 | multiple EGF-like-domains 8                               | K.LDGGQLVWETLM*DSR.L                  | 3 | 3.83 | 0.36 | -3.13 |
| IPI00607580 | multiple EGF-like-domains 8                               | K.WCTNCPGACIGR.N                      | 2 | 4.19 | 0.41 | -4.04 |
| IPI00607580 | multiple EGF-like-domains 8                               | R.ALLVHGGHRPSTAR.F                    | 2 | 2.49 | 0.27 | -4.47 |
| IPI00607580 | multiple EGF-like-domains 8                               | R.CEPGFLGR.A                          | 2 | 1.86 | 0.06 | -1.76 |
| IPI00607580 | multiple EGF-like-domains 8                               | R.CM*EGGLSGPR.D                       | 2 | 2.84 | 0.32 | -1.37 |
| IPI00607580 | multiple EGF-like-domains 8                               | R.FLDTGVVQSDR.S                       | 2 | 4.23 | 0.29 | -3.20 |
| IPI00607580 | multiple EGF-like-domains 8                               | R.GAM*YLLGGLTAGGVTR.D                 | 2 | 5.09 | 0.45 | -3.54 |
| IPI00607580 | multiple EGF-like-domains 8                               | R.GAM*YLLGGLTAGGVTR.D                 | 3 | 4.67 | 0.30 | -2.11 |
| IPI00607580 | multiple EGF-like-domains 8                               | R.GDLM*AYK.V                          | 1 | 1.62 | 0.07 | -2.56 |
| IPI00607580 | multiple EGF-like-domains 8                               | R.GDLM*AYK.V                          | 2 | 2.49 | 0.20 | -3.42 |
| IPI00607580 | multiple EGF-like-domains 8                               | R.GPESCSLGCAQATQCALCLR.R              | 2 | 5.74 | 0.64 | -3.59 |
| IPI00607580 | multiple EGF-like-domains 8                               | R.GPESCSLGCAQATQCALCLR.R              | 3 | 5.56 | 0.44 | -3.06 |
| IPI00607580 | multiple EGF-like-domains 8                               | R.GPLLASLSGSTRPPPIEASSGK.M            | 2 | 5.79 | 0.61 | -3.95 |
| IPI00607580 | multiple EGF-like-domains 8                               | R.GPLLASLSGSTRPPPIEASSGK.M            | 3 | 4.40 | 0.52 | -2.99 |
| IPI00607580 | multiple EGF-like-domains 8                               | R.LFHASALLGDTM*VVLGGR.S               | 3 | 3.90 | 0.39 | -2.59 |
| IPI00607580 | multiple EGF-like-domains 8                               | R.LGCGGSPCSPM*PR.S                    | 2 | 3.05 | 0.36 | -2.65 |
| IPI00607580 | multiple EGF-like-domains 8                               | R.LGHTM*VDGPDATLWM*FGGLGLPQGLLGNLYR.Y | 3 | 4.95 | 0.32 | -2.31 |
| IPI00607580 | multiple EGF-like-domains 8                               | R.LLALTLPPDPCR.L                      | 2 | 3.46 | 0.41 | -4.32 |
| IPI00607580 | multiple EGF-like-domains 8                               | R.LLGDCQACLAFSSPTAPPR.G               | 3 | 3.36 | 0.25 | -0.53 |
| IPI00607580 | multiple EGF-like-domains 8                               | R.LLRGPESCSLGCAQATQCALCLR.R           | 3 | 5.42 | 0.39 | -1.68 |
| IPI00607580 | multiple EGF-like-domains 8                               | R.LSADTASR.F                          | 2 | 2.52 | 0.20 | -3.22 |
| IPI00607580 | multiple EGF-like-domains 8                               | R.LYISGGFGGVALGR.L                    | 2 | 4.43 | 0.50 | -3.67 |
| IPI00607580 | multiple EGF-like-domains 8                               | R.QEKAPQTVELPAVAGHTLTAR.R             | 2 | 4.24 | 0.37 | -3.87 |
| IPI00607580 | multiple EGF-like-domains 8                               | R.QEKAPQTVELPAVAGHTLTAR.R             | 3 | 3.88 | 0.38 | -2.97 |
| IPI00607580 | multiple EGF-like-domains 8                               | R.RVGGLLPPGGGAAR.A                    | 2 | 4.59 | 0.41 | -3.31 |
| IPI00607580 | multiple EGF-like-domains 8                               | R.SASVGPPM*EESVAHAVAAVGSR.L           | 2 | 5.06 | 0.56 | -2.37 |

|             |                                                      |                               |   |      |      |       |
|-------------|------------------------------------------------------|-------------------------------|---|------|------|-------|
| IPI00607580 | multiple EGF-like-domains 8                          | R.SASVGPMM*EESVAHAVAAVGSR.L   | 3 | 3.17 | 0.49 | -3.84 |
| IPI00607580 | multiple EGF-like-domains 8                          | R.SFHAAAYVPAGR.G              | 1 | 3.37 | 0.33 | -3.97 |
| IPI00607580 | multiple EGF-like-domains 8                          | R.SFHAAAYVPAGR.G              | 2 | 3.70 | 0.47 | -3.81 |
| IPI00607580 | multiple EGF-like-domains 8                          | R.SLIAAFCGQR.R                | 1 | 1.30 | 0.09 | -2.30 |
| IPI00607580 | multiple EGF-like-domains 8                          | R.SLIAAFCGQR.R                | 2 | 3.69 | 0.39 | -1.86 |
| IPI00607580 | multiple EGF-like-domains 8                          | R.TGVPGGSEISFFFLEPYR.S        | 2 | 4.50 | 0.26 | -7.13 |
| IPI00607580 | multiple EGF-like-domains 8                          | R.TGVPGGSEISFFFLEPYR.S        | 3 | 3.97 | 0.13 | -3.40 |
| IPI00607580 | multiple EGF-like-domains 8                          | R.TLQPGDGEASTPR.C             | 1 | 1.97 | 0.27 | -1.84 |
| IPI00607580 | multiple EGF-like-domains 8                          | R.TLQPGDGEASTPR.C             | 2 | 3.56 | 0.42 | -3.28 |
| IPI00607580 | multiple EGF-like-domains 8                          | R.TLQPGDGEASTPR.C             | 3 | 2.65 | 0.12 | -2.26 |
| IPI00607580 | multiple EGF-like-domains 8                          | R.TPHDLFSSGLFR.F              | 1 | 1.97 | 0.30 | -2.27 |
| IPI00607580 | multiple EGF-like-domains 8                          | R.TPHDLFSSGLFR.F              | 2 | 2.57 | 0.45 | -4.38 |
| IPI00607580 | multiple EGF-like-domains 8                          | R.TPHDLFSSGLFR.F              | 3 | 3.32 | 0.23 | -2.27 |
| IPI00607580 | multiple EGF-like-domains 8                          | R.TWSSLAPSQGAK.R              | 1 | 2.36 | 0.29 | -1.83 |
| IPI00607580 | multiple EGF-like-domains 8                          | R.TWSSLAPSQGAK.R              | 2 | 2.99 | 0.21 | -2.12 |
| IPI00607580 | multiple EGF-like-domains 8                          | R.VGGLLPPGGGAAR.A             | 2 | 2.61 | 0.16 | -2.40 |
| IPI00607580 | multiple EGF-like-domains 8                          | R.WTQM*LAGAEDGGPGPSR.S        | 2 | 4.66 | 0.51 | -6.90 |
| IPI00607580 | multiple EGF-like-domains 8                          | W.TQM*LAGAEDGGPGPSR.S         | 2 | 4.54 | 0.50 | -3.94 |
| IPI00607580 | multiple EGF-like-domains 8                          | W.VGEGGLPVALPAR.W             | 2 | 3.04 | 0.24 | -1.28 |
| IPI00607600 | amyloid precursor-like protein 1 isoform 1 precursor | A.ALEGFLAALQADPPQAER.V        | 2 | 4.42 | 0.31 | -2.13 |
| IPI00607600 | amyloid precursor-like protein 1 isoform 1 precursor | A.DRQALNEHFQSILQTLEEQVSGER.Q  | 3 | 5.03 | 0.43 | -3.54 |
| IPI00607600 | amyloid precursor-like protein 1 isoform 1 precursor | A.PGSAQVAGLCGR.L              | 1 | 3.01 | 0.39 | -4.34 |
| IPI00607600 | amyloid precursor-like protein 1 isoform 1 precursor | D.PSGTAVGDPSTR.S              | 2 | 3.50 | 0.41 | -2.79 |
| IPI00607600 | amyloid precursor-like protein 1 isoform 1 precursor | E.IQRDELAPAGTGVS.R.E          | 2 | 3.73 | 0.34 | -1.89 |
| IPI00607600 | amyloid precursor-like protein 1 isoform 1 precursor | F.HSSEIQRDELAPAGTGVS.R.E      | 3 | 4.16 | 0.36 | -3.34 |
| IPI00607600 | amyloid precursor-like protein 1 isoform 1 precursor | F.LAALQADPPQAER.V             | 2 | 3.36 | 0.26 | -2.23 |
| IPI00607600 | amyloid precursor-like protein 1 isoform 1 precursor | G.SLAGGSPGAAEAPGSAQVAGLCGR.L  | 2 | 5.88 | 0.66 | -3.29 |
| IPI00607600 | amyloid precursor-like protein 1 isoform 1 precursor | G.SLAGGSPGAAEAPGSAQVAGLCGR.L  | 3 | 4.79 | 0.50 | -3.22 |
| IPI00607600 | amyloid precursor-like protein 1 isoform 1 precursor | I.GSLAGGSPGAAEAPGSAQVAGLCGR.L | 2 | 5.34 | 0.53 | -3.16 |
| IPI00607600 | amyloid precursor-like protein 1 isoform 1 precursor | I.GSLAGGSPGAAEAPGSAQVAGLCGR.L | 3 | 4.09 | 0.45 | -2.81 |

|             |                                                      |                               |   |      |      |       |
|-------------|------------------------------------------------------|-------------------------------|---|------|------|-------|
| IPI00607600 | amyloid precursor-like protein 1 isoform 1 precursor | K.ADRQALNEHFQSILQTLEEQVSGER.Q | 2 | 4.38 | 0.53 | -3.72 |
| IPI00607600 | amyloid precursor-like protein 1 isoform 1 precursor | K.ADRQALNEHFQSILQTLEEQVSGER.Q | 3 | 7.19 | 0.57 | -5.08 |
| IPI00607600 | amyloid precursor-like protein 1 isoform 1 precursor | K.ADRQALNEHFQSILQTLEEQVSGER.Q | 4 | 2.82 | 0.19 | -4.90 |
| IPI00607600 | amyloid precursor-like protein 1 isoform 1 precursor | K.DADTPM*TLPK.G               | 2 | 3.13 | 0.24 | -3.80 |
| IPI00607600 | amyloid precursor-like protein 1 isoform 1 precursor | K.EKM*NPLEQYER.K              | 2 | 2.65 | 0.18 | -3.58 |
| IPI00607600 | amyloid precursor-like protein 1 isoform 1 precursor | K.GGLQPPDSKDADTPM*TLPK.G      | 3 | 3.43 | 0.33 | -1.67 |
| IPI00607600 | amyloid precursor-like protein 1 isoform 1 precursor | K.GSTEQDAASPEKEK.M            | 2 | 3.89 | 0.32 | -3.42 |
| IPI00607600 | amyloid precursor-like protein 1 isoform 1 precursor | K.GSTEQDAASPEKEKM*NPLEQYER.K  | 2 | 3.06 | 0.41 | -2.67 |
| IPI00607600 | amyloid precursor-like protein 1 isoform 1 precursor | K.GSTEQDAASPEKEKM*NPLEQYER.K  | 3 | 3.25 | 0.26 | -2.68 |
| IPI00607600 | amyloid precursor-like protein 1 isoform 1 precursor | K.GSTEQDAASPEKEKM*NPLEQYER.K  | 4 | 2.00 | 0.35 | -2.26 |
| IPI00607600 | amyloid precursor-like protein 1 isoform 1 precursor | K.M*NPLEQYER.K                | 1 | 1.66 | 0.24 | -2.38 |
| IPI00607600 | amyloid precursor-like protein 1 isoform 1 precursor | K.M*NPLEQYER.K                | 2 | 3.13 | 0.26 | -4.45 |
| IPI00607600 | amyloid precursor-like protein 1 isoform 1 precursor | L.APAGTGVSR.E                 | 1 | 2.16 | 0.27 | -2.49 |
| IPI00607600 | amyloid precursor-like protein 1 isoform 1 precursor | M.NPLEQYER.K                  | 1 | 2.17 | 0.19 | -3.81 |
| IPI00607600 | amyloid precursor-like protein 1 isoform 1 precursor | P.FHSSEIQR.D                  | 1 | 2.73 | 0.13 | -5.46 |
| IPI00607600 | amyloid precursor-like protein 1 isoform 1 precursor | P.FHSSEIQRDELAPAGTGVSR.E      | 2 | 5.05 | 0.45 | -3.28 |
| IPI00607600 | amyloid precursor-like protein 1 isoform 1 precursor | P.FHSSEIQRDELAPAGTGVSR.E      | 3 | 4.77 | 0.33 | -2.63 |
| IPI00607600 | amyloid precursor-like protein 1 isoform 1 precursor | P.KGSTEQDAASPEKEK.M           | 2 | 3.11 | 0.26 | -1.94 |
| IPI00607600 | amyloid precursor-like protein 1 isoform 1 precursor | Q.ALNEHFQSILQTLEEQVSGER.Q     | 2 | 6.59 | 0.55 | -2.73 |
| IPI00607600 | amyloid precursor-like protein 1 isoform 1 precursor | Q.ALNEHFQSILQTLEEQVSGER.Q     | 3 | 3.97 | 0.33 | -2.51 |
| IPI00607600 | amyloid precursor-like protein 1 isoform 1 precursor | R.AALEGFLAALQAD.P             | 1 | 2.12 | 0.17 | -4.04 |

|             |                                                      |                              |   |      |      |       |
|-------------|------------------------------------------------------|------------------------------|---|------|------|-------|
| IPI00607600 | amyloid precursor-like protein 1 isoform 1 precursor | R.AALEGFLAALQAD.P            | 2 | 3.72 | 0.26 | -4.74 |
| IPI00607600 | amyloid precursor-like protein 1 isoform 1 precursor | R.AALEGFLAALQADPPQAER.V      | 2 | 4.92 | 0.46 | -5.73 |
| IPI00607600 | amyloid precursor-like protein 1 isoform 1 precursor | R.AALEGFLAALQADPPQAER.V      | 3 | 5.84 | 0.47 | -4.11 |
| IPI00607600 | amyloid precursor-like protein 1 isoform 1 precursor | R.AALEGFLAALQADPPQAER.V      | 4 | 3.80 | 0.16 | -1.41 |
| IPI00607600 | amyloid precursor-like protein 1 isoform 1 precursor | R.AKM*DLEER.R                | 2 | 2.88 | 0.18 | -3.09 |
| IPI00607600 | amyloid precursor-like protein 1 isoform 1 precursor | R.CLPGEFVSEALLVPEGCR.F       | 2 | 3.89 | 0.42 | -4.91 |
| IPI00607600 | amyloid precursor-like protein 1 isoform 1 precursor | R.CLPGEFVSEALLVPEGCR.F       | 3 | 4.24 | 0.29 | -4.31 |
| IPI00607600 | amyloid precursor-like protein 1 isoform 1 precursor | R.DELAPAGTGVS.R.E            | 1 | 2.49 | 0.25 | -3.43 |
| IPI00607600 | amyloid precursor-like protein 1 isoform 1 precursor | R.DELAPAGTGVS.R.E            | 2 | 3.12 | 0.28 | -3.03 |
| IPI00607600 | amyloid precursor-like protein 1 isoform 1 precursor | R.DELAPAGTGVS.R.E.A          | 2 | 3.43 | 0.30 | -2.87 |
| IPI00607600 | amyloid precursor-like protein 1 isoform 1 precursor | R.EAVSGLLIM*GAGG.G           | 1 | 2.42 | 0.25 | -3.74 |
| IPI00607600 | amyloid precursor-like protein 1 isoform 1 precursor | R.EAVSGLLIM*GAGG.G           | 2 | 3.04 | 0.34 | -2.60 |
| IPI00607600 | amyloid precursor-like protein 1 isoform 1 precursor | R.EAVSGLLIM*GAGGGS.L         | 2 | 3.28 | 0.35 | -2.60 |
| IPI00607600 | amyloid precursor-like protein 1 isoform 1 precursor | R.EWAM*ADNQSK.N              | 2 | 2.48 | 0.28 | -1.45 |
| IPI00607600 | amyloid precursor-like protein 1 isoform 1 precursor | R.FQVHHLQVIEER.V             | 2 | 3.96 | 0.46 | -4.47 |
| IPI00607600 | amyloid precursor-like protein 1 isoform 1 precursor | R.FQVHHLQVIEER.V             | 3 | 3.19 | 0.35 | -3.29 |
| IPI00607600 | amyloid precursor-like protein 1 isoform 1 precursor | R.GFPFHSSEIQ.R               | 1 | 2.13 | 0.30 | -4.72 |
| IPI00607600 | amyloid precursor-like protein 1 isoform 1 precursor | R.GFPFHSSEIQ.R               | 2 | 3.27 | 0.34 | -2.61 |
| IPI00607600 | amyloid precursor-like protein 1 isoform 1 precursor | R.GFPFHSSEIQR.D              | 2 | 2.78 | 0.36 | -3.38 |
| IPI00607600 | amyloid precursor-like protein 1 isoform 1 precursor | R.GFPFHSSEIQRDELAPAGTGVS.R.E | 2 | 4.10 | 0.39 | -4.71 |
| IPI00607600 | amyloid precursor-like protein 1 isoform 1 precursor | R.GFPFHSSEIQRDELAPAGTGVS.R.E | 3 | 3.15 | 0.25 | -4.76 |

|             |                                                      |                                   |   |      |      |       |
|-------------|------------------------------------------------------|-----------------------------------|---|------|------|-------|
| IPI00607600 | amyloid precursor-like protein 1 isoform 1 precursor | R.HQEAQEACSSQGLILHGSGM*LLPCGSDR.F | 3 | 4.78 | 0.53 | -3.14 |
| IPI00607600 | amyloid precursor-like protein 1 isoform 1 precursor | R.HYQHVAAVDPEK.A                  | 2 | 3.41 | 0.46 | -4.18 |
| IPI00607600 | amyloid precursor-like protein 1 isoform 1 precursor | R.HYQHVAAVDPEKAQQM*R.F            | 3 | 3.21 | 0.30 | -3.21 |
| IPI00607600 | amyloid precursor-like protein 1 isoform 1 precursor | R.HYQHVAAVDPEKAQQM*R.F            | 4 | 2.93 | 0.22 | -2.06 |
| IPI00607600 | amyloid precursor-like protein 1 isoform 1 precursor | R.LVETHATR.V                      | 1 | 1.49 | 0.14 | -3.60 |
| IPI00607600 | amyloid precursor-like protein 1 isoform 1 precursor | R.LVETHATR.V                      | 2 | 2.72 | 0.29 | -3.03 |
| IPI00607600 | amyloid precursor-like protein 1 isoform 1 precursor | R.QALNEHFQSILQTLLEE.Q             | 2 | 3.55 | 0.32 | -3.86 |
| IPI00607600 | amyloid precursor-like protein 1 isoform 1 precursor | R.QALNEHFQSILQTLLEEVS.G           | 2 | 3.42 | 0.34 | -5.24 |
| IPI00607600 | amyloid precursor-like protein 1 isoform 1 precursor | R.QALNEHFQSILQTLLEEVS.GE.R        | 2 | 4.82 | 0.46 | -3.56 |
| IPI00607600 | amyloid precursor-like protein 1 isoform 1 precursor | R.QALNEHFQSILQTLLEEVS.GER.Q       | 2 | 4.56 | 0.48 | -5.71 |
| IPI00607600 | amyloid precursor-like protein 1 isoform 1 precursor | R.QALNEHFQSILQTLLEEVS.GER.Q       | 3 | 5.58 | 0.49 | -5.68 |
| IPI00607600 | amyloid precursor-like protein 1 isoform 1 precursor | R.QALNEHFQSILQTLLEEVS.GER.Q       | 4 | 3.66 | 0.31 | -3.53 |
| IPI00607600 | amyloid precursor-like protein 1 isoform 1 precursor | R.QALNEHFQSILQTLLEEVS.GER.Q.R     | 3 | 4.17 | 0.40 | -1.23 |
| IPI00607600 | amyloid precursor-like protein 1 isoform 1 precursor | R.QINEVM*R.E                      | 2 | 1.89 | 0.10 | -3.21 |
| IPI00607600 | amyloid precursor-like protein 1 isoform 1 precursor | R.QINEVM*REWAM*ADNQSK.N           | 2 | 2.54 | 0.13 |       |
| IPI00607600 | amyloid precursor-like protein 1 isoform 1 precursor | R.QINEVM*REWAM*ADNQSK.N           | 3 | 2.31 | 0.23 | -3.23 |
| IPI00607600 | amyloid precursor-like protein 1 isoform 1 precursor | R.QM*YPELQIAR.V                   | 2 | 2.37 | 0.29 | -3.84 |
| IPI00607600 | amyloid precursor-like protein 1 isoform 1 precursor | R.QRLVETHATR.V                    | 2 | 2.60 | 0.11 | -2.75 |
| IPI00607600 | amyloid precursor-like protein 1 isoform 1 precursor | R.RAALEGFLAALQAD.P                | 2 | 2.94 | 0.23 | -1.90 |
| IPI00607600 | amyloid precursor-like protein 1 isoform 1 precursor | R.RAALEGFLAALQADPPQAER.V          | 3 | 5.14 | 0.43 | -3.99 |
| IPI00607600 | amyloid precursor-like protein 1 isoform 1 precursor | R.RAALEGFLAALQADPPQAER.V          | 4 | 3.24 | 0.36 | -1.37 |

|             |                                                      |                            |   |      |      |       |
|-------------|------------------------------------------------------|----------------------------|---|------|------|-------|
| IPI00607600 | amyloid precursor-like protein 1 isoform 1 precursor | R.VEQATQAIPM*ER.W          | 2 | 3.92 | 0.39 | -5.36 |
| IPI00607600 | amyloid precursor-like protein 1 isoform 1 precursor | R.VEQATQAIPM*ER.W          | 3 | 2.92 | 0.10 | -3.29 |
| IPI00607600 | amyloid precursor-like protein 1 isoform 1 precursor | R.VIALINDQR.R              | 2 | 3.39 | 0.06 | -2.90 |
| IPI00607600 | amyloid precursor-like protein 1 isoform 1 precursor | R.VIALINDQRR.A             | 2 | 2.56 | 0.06 | -2.87 |
| IPI00607600 | amyloid precursor-like protein 1 isoform 1 precursor | R.VLEYCR.Q                 | 1 | 1.32 | 0.11 | -2.36 |
| IPI00607600 | amyloid precursor-like protein 1 isoform 1 precursor | R.WEPDPQR.S                | 2 | 1.75 | 0.09 | -2.55 |
| IPI00607600 | amyloid precursor-like protein 1 isoform 1 precursor | R.YLRAEQKEQR.H             | 3 | 2.37 | 0.21 | -3.06 |
| IPI00607600 | amyloid precursor-like protein 1 isoform 1 precursor | S.EIQRDELAPAGTGVSR.E       | 2 | 4.12 | 0.38 | -1.14 |
| IPI00607600 | amyloid precursor-like protein 1 isoform 1 precursor | S.PGAAEAPGSAQVAGLCGR.L     | 2 | 4.07 | 0.53 | -3.66 |
| IPI00607600 | amyloid precursor-like protein 1 isoform 1 precursor | V.EQATQAIPM*ER.W           | 2 | 2.93 | 0.23 | -1.75 |
| IPI00607655 | Isoform 2 of Ephrin type-A receptor 7 precursor      | K.IDTIAADESFTQGDLGER.K     | 2 | 5.91 | 0.62 | -4.77 |
| IPI00607655 | Isoform 2 of Ephrin type-A receptor 7 precursor      | K.IDTIAADESFTQGDLGER.K     | 3 | 4.34 | 0.46 | -4.05 |
| IPI00607655 | Isoform 2 of Ephrin type-A receptor 7 precursor      | R.AFTAAGYGNYSR.L           | 2 | 3.32 | 0.45 | -2.95 |
| IPI00607655 | Isoform 2 of Ephrin type-A receptor 7 precursor      | R.EIGPLSK.K                | 1 | 1.40 | 0.12 | -2.36 |
| IPI00607655 | Isoform 2 of Ephrin type-A receptor 7 precursor      | R.SVELSWQEPEHPNGVITEYEIK.Y | 3 | 3.22 | 0.17 | -3.38 |
| IPI00607655 | Isoform 2 of Ephrin type-A receptor 7 precursor      | V.KIDTIAADESFTQGDLGER.K    | 2 | 6.39 | 0.61 | -1.98 |
| IPI00607655 | Isoform 2 of Ephrin type-A receptor 7 precursor      | V.KIDTIAADESFTQGDLGER.K    | 3 | 4.38 | 0.36 | -1.48 |
| IPI00607831 | PRAME family member 3                                | P.LETLALTYGFLEKVDLK.C      | 2 | 3.15 | 0.17 | -5.27 |
| IPI00639937 | B-factor, properdin                                  | A.PGYDKVKDISEVVTPR.F       | 2 | 4.33 | 0.46 | -2.05 |
| IPI00639937 | B-factor, properdin                                  | C.PSGFYYPVQTR.T            | 2 | 2.98 | 0.34 | -2.75 |
| IPI00639937 | B-factor, properdin                                  | K.ALFVSEEEK.K              | 1 | 2.27 | 0.27 | -2.82 |
| IPI00639937 | B-factor, properdin                                  | K.ALFVSEEEK.K              | 2 | 3.02 | 0.24 | -2.56 |
| IPI00639937 | B-factor, properdin                                  | K.ALFVSEEEK.L              | 1 | 2.75 | 0.12 | -3.07 |
| IPI00639937 | B-factor, properdin                                  | K.ALFVSEEEK.L              | 2 | 3.20 | 0.36 | -3.06 |
| IPI00639937 | B-factor, properdin                                  | K.CLVNLIK.V                | 2 | 3.07 | 0.13 | -1.64 |
| IPI00639937 | B-factor, properdin                                  | K.DISEVVTPR.F              | 1 | 2.69 | 0.22 | -3.73 |
| IPI00639937 | B-factor, properdin                                  | K.DISEVVTPR.F              | 2 | 3.42 | 0.28 | -2.70 |
| IPI00639937 | B-factor, properdin                                  | K.DNEQHVFK.V               | 1 | 2.42 | 0.13 | -3.09 |
| IPI00639937 | B-factor, properdin                                  | K.EAGIPEFYDYDVALIK.L       | 1 | 1.10 | 0.36 | -2.70 |
| IPI00639937 | B-factor, properdin                                  | K.EAGIPEFYDYDVALIK.L       | 2 | 4.70 | 0.51 | -6.61 |
| IPI00639937 | B-factor, properdin                                  | K.EAGIPEFYDYDVALIK.L       | 3 | 3.92 | 0.38 | -4.27 |
| IPI00639937 | B-factor, properdin                                  | K.EELPAQDIK.A              | 1 | 2.17 | 0.15 | -2.57 |

|             |                     |                                    |   |      |      |       |
|-------------|---------------------|------------------------------------|---|------|------|-------|
| IPI00639937 | B-factor, properdin | K.EELPAQDIK.A                      | 2 | 2.30 | 0.09 | -3.35 |
| IPI00639937 | B-factor, properdin | K.EKLQDEDLGFL.-                    | 1 | 2.99 | 0.22 | -3.75 |
| IPI00639937 | B-factor, properdin | K.EKLQDEDLGFL.-                    | 2 | 3.86 | 0.40 | -4.54 |
| IPI00639937 | B-factor, properdin | K.EVYIKNGDKK.G                     | 2 | 2.95 | 0.16 | -2.31 |
| IPI00639937 | B-factor, properdin | K.ISVIRPSK.G                       | 2 | 2.51 | 0.13 | -3.46 |
| IPI00639937 | B-factor, properdin | K.KCLVNLIEK.V                      | 2 | 2.26 | 0.11 | -2.98 |
| IPI00639937 | B-factor, properdin | K.KDNEQHVFK.V                      | 1 | 2.03 | 0.12 | -4.48 |
| IPI00639937 | B-factor, properdin | K.KDNEQHVFK.V                      | 2 | 3.04 | 0.32 | -2.96 |
| IPI00639937 | B-factor, properdin | K.LQDEDLGFL.-                      | 1 | 1.87 | 0.18 | -4.96 |
| IPI00639937 | B-factor, properdin | K.LQDEDLGFL.-                      | 2 | 2.50 | 0.21 | -2.37 |
| IPI00639937 | B-factor, properdin | K.NPREDYLDVYVFGVGPLVNQVNINALASK.K  | 3 | 7.19 | 0.50 | -5.23 |
| IPI00639937 | B-factor, properdin | K.NPREDYLDVYVFGVGPLVNQVNINALASKK.D | 3 | 3.92 | 0.29 | -1.92 |
| IPI00639937 | B-factor, properdin | K.QLNEINYEDHK.L                    | 1 | 2.07 | 0.19 | -2.47 |
| IPI00639937 | B-factor, properdin | K.QLNEINYEDHK.L                    | 2 | 2.77 | 0.42 | -4.66 |
| IPI00639937 | B-factor, properdin | K.QLNEINYEDHKK.S                   | 2 | 2.53 | 0.35 | -3.97 |
| IPI00639937 | B-factor, properdin | K.RDLEIEVVLFFHPNYNINGK.K           | 3 | 3.57 | 0.24 | -4.33 |
| IPI00639937 | B-factor, properdin | K.VASYGVKPR.Y                      | 1 | 2.21 | 0.17 | -5.14 |
| IPI00639937 | B-factor, properdin | K.VASYGVKPR.Y                      | 2 | 2.87 | 0.33 | -2.82 |
| IPI00639937 | B-factor, properdin | K.VKDISEVVTFR.F                    | 1 | 2.82 | 0.25 | -3.79 |
| IPI00639937 | B-factor, properdin | K.VKDISEVVTFR.F                    | 2 | 4.19 | 0.41 | -3.41 |
| IPI00639937 | B-factor, properdin | K.VKDISEVVTFR.F                    | 3 | 3.92 | 0.15 | -4.36 |
| IPI00639937 | B-factor, properdin | K.VSEADSSNADWVTK.Q                 | 2 | 5.06 | 0.51 | -2.40 |
| IPI00639937 | B-factor, properdin | K.VSVGGKDR.D                       | 2 | 1.95 | 0.09 | -2.36 |
| IPI00639937 | B-factor, properdin | K.YGQTIRPICLPCTEGTTR.A             | 2 | 3.71 | 0.45 | -2.92 |
| IPI00639937 | B-factor, properdin | K.YGQTIRPICLPCTEGTTR.A             | 3 | 3.81 | 0.36 | -4.06 |
| IPI00639937 | B-factor, properdin | R.ALRLPPTTTTCQQKEELPAQDIK.A        | 3 | 4.28 | 0.36 | -5.03 |
| IPI00639937 | B-factor, properdin | R.DAQYAPGYDK.V                     | 1 | 2.53 | 0.29 | -3.55 |
| IPI00639937 | B-factor, properdin | R.DAQYAPGYDK.V                     | 2 | 3.31 | 0.25 | -3.99 |
| IPI00639937 | B-factor, properdin | R.DAQYAPGYDKVK.D                   | 1 | 2.24 | 0.20 | 0.38  |
| IPI00639937 | B-factor, properdin | R.DAQYAPGYDKVK.D                   | 2 | 3.11 | 0.30 | -3.29 |
| IPI00639937 | B-factor, properdin | R.DAQYAPGYDKVK.D                   | 3 | 1.98 | 0.20 | -3.57 |
| IPI00639937 | B-factor, properdin | R.DAQYAPGYDKVKDISEVVTFR.F          | 2 | 5.40 | 0.59 | -2.96 |
| IPI00639937 | B-factor, properdin | R.DAQYAPGYDKVKDISEVVTFR.F          | 3 | 3.77 | 0.41 | -2.75 |
| IPI00639937 | B-factor, properdin | R.DAQYAPGYDKVKDISEVVTFR.F          | 4 | 3.09 | 0.23 | -1.71 |
| IPI00639937 | B-factor, properdin | R.DFHINLFQVLPWLK.E                 | 2 | 3.25 | 0.24 | -4.14 |
| IPI00639937 | B-factor, properdin | R.DFHINLFQVLPWLK.E                 | 3 | 4.20 | 0.10 | -3.43 |
| IPI00639937 | B-factor, properdin | R.DLEIEVVLFFHPNYNINGK.K            | 2 | 5.07 | 0.45 | -4.16 |
| IPI00639937 | B-factor, properdin | R.DLEIEVVLFFHPNYNINGK.K            | 3 | 3.82 | 0.38 | -4.35 |
| IPI00639937 | B-factor, properdin | R.DLLYIGK.D                        | 1 | 1.98 | 0.15 | -1.85 |
| IPI00639937 | B-factor, properdin | R.DLLYIGKDR.K                      | 2 | 2.89 | 0.22 | -1.61 |
| IPI00639937 | B-factor, properdin | R.EDYLDVYVFGVGPLVNQVNINALASK.K     | 2 | 5.00 | 0.53 | -1.52 |
| IPI00639937 | B-factor, properdin | R.EDYLDVYVFGVGPLVNQVNINALASK.K     | 3 | 4.05 | 0.49 | -2.69 |



|             |                                         |                                     |   |      |      |       |
|-------------|-----------------------------------------|-------------------------------------|---|------|------|-------|
| IPI00639937 | B-factor, properdin                     | R.EDYLDVYVFGVGPLVNQVNINALASKK.D     | 3 | 3.45 | 0.28 | -4.31 |
| IPI00639937 | B-factor, properdin                     | R.FIQVGVISWGVVDVCK.N                | 2 | 2.56 | 0.22 | -0.04 |
| IPI00639937 | B-factor, properdin                     | R.FLCTGGVSPYADPNTCR.G               | 2 | 5.01 | 0.49 | -5.66 |
| IPI00639937 | B-factor, properdin                     | R.FLCTGGVSPYADPNTCR.G               | 3 | 3.59 | 0.36 | -4.42 |
| IPI00639937 | B-factor, properdin                     | R.GDSGGPLIVHK.R                     | 1 | 2.11 | 0.22 | -4.23 |
| IPI00639937 | B-factor, properdin                     | R.HVIILM*TDGLHNM*GGDPITVIDEIR.D     | 3 | 5.75 | 0.58 | -4.90 |
| IPI00639937 | B-factor, properdin                     | R.HVIILM*TDGLHNM*GGDPITVIDEIR.D     | 4 | 3.63 | 0.21 | -3.61 |
| IPI00639937 | B-factor, properdin                     | R.KNPREDYLDVYVFGVGPLVNQVNINALASK.K  | 3 | 8.07 | 0.60 | -5.11 |
| IPI00639937 | B-factor, properdin                     | R.KNPREDYLDVYVFGVGPLVNQVNINALASK.K  | 4 | 5.74 | 0.46 | -4.93 |
| IPI00639937 | B-factor, properdin                     | R.LEDSVTYHCSR.G                     | 2 | 3.93 | 0.42 | -2.26 |
| IPI00639937 | B-factor, properdin                     | R.LEDSVTYHCSR.G                     | 3 | 1.94 | 0.11 | -0.75 |
| IPI00639937 | B-factor, properdin                     | R.LLQEGQALEYVCPSGFYYPVQTR.T         | 2 | 4.85 | 0.55 | -5.96 |
| IPI00639937 | B-factor, properdin                     | R.LLQEGQALEYVCPSGFYYPVQTR.T         | 3 | 6.89 | 0.54 | -6.53 |
| IPI00639937 | B-factor, properdin                     | R.LLQEGQALEYVCPSGFYYPVQTR.T         | 4 | 4.22 | 0.44 | -3.67 |
| IPI00639937 | B-factor, properdin                     | R.LPPTTTCCQQK.E                     | 2 | 3.17 | 0.44 | -3.38 |
| IPI00639937 | B-factor, properdin                     | R.LPPTTTCCQQKEELLPAQDIK.A           | 3 | 3.71 | 0.28 | -3.85 |
| IPI00639937 | B-factor, properdin                     | R.PQGSCSLEGVEIK.G                   | 2 | 4.15 | 0.33 | -3.93 |
| IPI00639937 | B-factor, properdin                     | R.WSGQTAICDNGAGYCSNPGIPIGTR.K       | 2 | 5.47 | 0.59 | -1.92 |
| IPI00639937 | B-factor, properdin                     | R.WSGQTAICDNGAGYCSNPGIPIGTR.K       | 3 | 5.16 | 0.50 | -2.52 |
| IPI00639937 | B-factor, properdin                     | R.YGLVTYATYPK.I                     | 1 | 2.08 | 0.30 | -3.70 |
| IPI00639937 | B-factor, properdin                     | R.YGLVTYATYPK.I                     | 2 | 4.69 | 0.53 | -3.59 |
| IPI00640292 | Isoform 1 of Protein G7c precursor      | K.NPAGVSQQEEGGGPLGHTR.R             | 3 | 3.01 | 0.07 | -3.06 |
| IPI00640292 | Isoform 1 of Protein G7c precursor      | R.AAPQPSTVVPVLELLESGPSGFLAPGSK.V    | 2 | 3.89 | 0.43 | -3.97 |
| IPI00640292 | Isoform 1 of Protein G7c precursor      | R.AAPQPSTVVPVLELLESGPSGFLAPGSK.V    | 3 | 4.36 | 0.38 | -4.06 |
| IPI00640810 | 6 kDa protein                           | -.MGAGFSRNSR.Q                      | 2 | 2.81 | 0.13 |       |
| IPI00640818 | Isoform 3 of Neuropathy target esterase | R.DGFQDVLAPGEGSAGR.I                | 2 | 2.51 | 0.07 | -2.84 |
| IPI00641181 | MARCKS-related protein                  | K.AAATPESQEPQAK.G                   | 2 | 2.87 | 0.27 | -1.98 |
| IPI00641251 | CD320 antigen precursor                 | R.TSGLCVPLTWR.C                     | 2 | 3.56 | 0.32 | -2.15 |
| IPI00641737 | Haptoglobin precursor                   | A.VDSGNDVTDIADDGCPKPPEIAHGYVEHSVR.Y | 3 | 7.06 | 0.55 |       |
| IPI00641737 | Haptoglobin precursor                   | D.SGNDVTDIADDGCPKPPEIAHGYVEHSVR.Y   | 3 | 6.73 | 0.41 |       |
| IPI00641737 | Haptoglobin precursor                   | K.AVGDKLPECEADDGCPKPPEIAHGYVEHSVR.Y | 3 | 6.22 | 0.49 |       |
| IPI00641737 | Haptoglobin precursor                   | K.AVGDKLPECEAVCGKPK.N               | 2 | 3.99 | 0.29 |       |
| IPI00641737 | Haptoglobin precursor                   | K.AVGDKLPECEAVCGKPK.N               | 3 | 5.02 | 0.33 |       |
| IPI00641737 | Haptoglobin precursor                   | K.DIAPTLTLYVGK.K                    | 1 | 2.75 | 0.25 |       |
| IPI00641737 | Haptoglobin precursor                   | K.DIAPTLTLYVGK.K                    | 2 | 3.34 | 0.27 |       |
| IPI00641737 | Haptoglobin precursor                   | K.DIAPTLTLYVGKK.Q                   | 1 | 3.09 | 0.15 |       |
| IPI00641737 | Haptoglobin precursor                   | K.DIAPTLTLYVGKK.Q                   | 2 | 3.14 | 0.25 |       |
| IPI00641737 | Haptoglobin precursor                   | K.DYAEVGR.V                         | 2 | 2.40 | 0.13 |       |
| IPI00641737 | Haptoglobin precursor                   | K.GSFPWQAK.M                        | 2 | 2.33 | 0.20 |       |
| IPI00641737 | Haptoglobin precursor                   | K.NPANPVQR.I                        | 1 | 1.95 | 0.19 |       |
| IPI00641737 | Haptoglobin precursor                   | K.NPANPVQR.I                        | 2 | 2.35 | 0.20 |       |
| IPI00641737 | Haptoglobin precursor                   | K.SCAVAEYGVYVK.V                    | 1 | 3.23 | 0.46 |       |

|             |                       |                                       |   |      |      |       |
|-------------|-----------------------|---------------------------------------|---|------|------|-------|
| IPI00641737 | Haptoglobin precursor | K.SCAVAEYGVVVK.V                      | 2 | 3.14 | 0.38 | 0.93  |
| IPI00641737 | Haptoglobin precursor | K.SPVGVQPILNEHTFCAGM*SK.Y             | 2 | 5.11 | 0.46 |       |
| IPI00641737 | Haptoglobin precursor | K.SPVGVQPILNEHTFCAGM*SK.Y             | 3 | 5.00 | 0.27 |       |
| IPI00641737 | Haptoglobin precursor | K.SPVGVQPILNEHTFCAGMSK.Y              | 2 | 5.44 | 0.47 |       |
| IPI00641737 | Haptoglobin precursor | K.SPVGVQPILNEHTFCAGMSK.Y              | 3 | 4.91 | 0.35 |       |
| IPI00641737 | Haptoglobin precursor | K.VTSIQDWVQK.T                        | 1 | 2.31 | 0.28 |       |
| IPI00641737 | Haptoglobin precursor | K.VTSIQDWVQK.T                        | 2 | 3.28 | 0.26 |       |
| IPI00641737 | Haptoglobin precursor | K.VTSIQDWVQKTIAEN.-                   | 2 | 3.93 | 0.14 |       |
| IPI00641737 | Haptoglobin precursor | K.VVLHPNYSQVDIGLIK.L                  | 2 | 2.99 | 0.35 |       |
| IPI00641737 | Haptoglobin precursor | K.VVLHPNYSQVDIGLIK.L                  | 3 | 5.81 | 0.41 |       |
| IPI00641737 | Haptoglobin precursor | K.YQEDTCYGDAGSAFAVHLEEDTWYATGILSFDK.S | 3 | 6.18 | 0.56 |       |
| IPI00641737 | Haptoglobin precursor | K.YVM*LPVADQDQCIR.H                   | 1 | 1.97 | 0.17 |       |
| IPI00641737 | Haptoglobin precursor | K.YVM*LPVADQDQCIR.H                   | 2 | 4.86 | 0.45 |       |
| IPI00641737 | Haptoglobin precursor | K.YVM*LPVADQDQCIR.H                   | 3 | 4.89 | 0.32 |       |
| IPI00641737 | Haptoglobin precursor | K.YVMLPVADQDQCIR.H                    | 1 | 2.50 | 0.22 |       |
| IPI00641737 | Haptoglobin precursor | K.YVMLPVADQDQCIR.H                    | 2 | 4.87 | 0.39 |       |
| IPI00641737 | Haptoglobin precursor | K.YVMLPVADQDQCIR.H                    | 3 | 5.42 | 0.41 |       |
| IPI00641737 | Haptoglobin precursor | R.HYEGSTVPEK.K                        | 1 | 2.11 | 0.21 |       |
| IPI00641737 | Haptoglobin precursor | R.HYEGSTVPEK.K                        | 2 | 2.75 | 0.20 |       |
| IPI00641737 | Haptoglobin precursor | R.HYEGSTVPEKK.T                       | 2 | 3.10 | 0.13 |       |
| IPI00641737 | Haptoglobin precursor | R.ILGGHLDK.G                          | 2 | 1.68 | 0.18 | -4.48 |
| IPI00641737 | Haptoglobin precursor | R.LRTEGDGVYTLNDKK.Q                   | 2 | 4.28 | 0.08 |       |
| IPI00641737 | Haptoglobin precursor | R.LRTEGDGVYTLNDKKQWINK.A              | 3 | 6.29 | 0.09 |       |
| IPI00641737 | Haptoglobin precursor | R.NANFKFTDHLK.Y                       | 3 | 2.54 | 0.20 |       |
| IPI00641737 | Haptoglobin precursor | R.TEGDGVYTLNDK.K                      | 2 | 4.13 | 0.08 |       |
| IPI00641737 | Haptoglobin precursor | R.TEGDGVYTLNDKK.Q                     | 1 | 3.03 | 0.07 |       |
| IPI00641737 | Haptoglobin precursor | R.TEGDGVYTLNDKK.Q                     | 2 | 3.03 | 0.11 |       |
| IPI00641737 | Haptoglobin precursor | R.VGYVSGWGR.N                         | 2 | 3.49 | 0.29 |       |
| IPI00641737 | Haptoglobin precursor | R.VM*PICLPSKDYAEVGR.V                 | 1 | 1.64 | 0.42 |       |
| IPI00641737 | Haptoglobin precursor | R.VM*PICLPSKDYAEVGR.V                 | 2 | 2.88 | 0.28 |       |
| IPI00641737 | Haptoglobin precursor | R.VMPICLPSKDYAEVGR.V                  | 1 | 3.30 | 0.22 |       |
| IPI00641737 | Haptoglobin precursor | R.VMPICLPSKDYAEVGR.V                  | 2 | 3.94 | 0.23 |       |
| IPI00641737 | Haptoglobin precursor | S.GNDVTDIADDGCPKPEIAHGYVEHSVR.Y       | 3 | 6.79 | 0.47 |       |
| IPI00642259 | Dystonin              | K.SEAYQQIEMER.L                       | 2 | 2.02 | 0.08 | 0.80  |
| IPI00642632 | C7 protein            | K.AAPSVTLFPPSSEELQANK.A               | 1 | 4.04 | 0.50 |       |
| IPI00642632 | C7 protein            | K.AAPSVTLFPPSSEELQANK.A               | 2 | 3.15 | 0.34 | -1.50 |
| IPI00642632 | C7 protein            | K.AAPSVTLFPPSSEELQANK.A               | 3 | 3.32 | 0.13 |       |
| IPI00642632 | C7 protein            | K.QSNNKYAASSYLSLTPEQWK.S              | 2 | 5.38 | 0.37 |       |
| IPI00642632 | C7 protein            | K.QSNNKYAASSYLSLTPEQWK.S              | 3 | 4.26 | 0.33 |       |
| IPI00642632 | C7 protein            | K.VGVETTKPSK.Q                        | 2 | 2.82 | 0.24 |       |
| IPI00642632 | C7 protein            | K.YAASSYLSLTPEQWK.S                   | 1 | 3.49 | 0.43 |       |
| IPI00642632 | C7 protein            | K.YAASSYLSLTPEQWK.S                   | 2 | 5.52 | 0.47 |       |

|             |                                                      |                                        |   |      |      |       |
|-------------|------------------------------------------------------|----------------------------------------|---|------|------|-------|
| IPI00642632 | C7 protein                                           | K.YAASSYLSLTPEQWK.S                    | 3 | 3.44 | 0.22 |       |
| IPI00642632 | C7 protein                                           | R.SYSCRVTHEGSTVEK.T                    | 2 | 4.16 | 0.32 |       |
| IPI00642645 | Methylenetetrahydrofolate reductase                  | R.KARVLPAGHYCPSLGIWASQVGSVR.S          | 3 | 2.90 | 0.14 |       |
| IPI00642861 | CDNA FLJ37558 fis, clone BRCOC1000087                | K.QSLVLVCQK.L                          | 2 | 2.52 | 0.11 | -1.79 |
| IPI00642861 | CDNA FLJ37558 fis, clone BRCOC1000087                | K.YQNEISDRR.I                          | 2 | 2.18 | 0.07 | -8.27 |
| IPI00642861 | CDNA FLJ37558 fis, clone BRCOC1000087                | R.AGENKDIFSLVSGCQAQLPSCESISSEK.Q       | 3 | 5.27 | 0.43 | -4.40 |
| IPI00642861 | CDNA FLJ37558 fis, clone BRCOC1000087                | R.DASAVGVIDKQEGSQEANR.A                | 2 | 5.13 | 0.50 | -3.74 |
| IPI00642861 | CDNA FLJ37558 fis, clone BRCOC1000087                | R.DASAVGVIDKQEGSQEANR.A                | 3 | 4.96 | 0.50 | -3.79 |
| IPI00642861 | CDNA FLJ37558 fis, clone BRCOC1000087                | R.FPSPVQDDIDSILVQCGDSIRPDPEVLGAASQLK.D | 3 | 3.91 | 0.29 | -2.66 |
| IPI00642861 | CDNA FLJ37558 fis, clone BRCOC1000087                | R.LTPDLVQGLASPLLR.C                    | 2 | 3.77 | 0.42 | 0.26  |
| IPI00643034 | Isoform 1 of Phospholipid transfer protein precursor | K.ALELVKQEGLR.F                        | 2 | 3.38 | 0.35 | -3.47 |
| IPI00643034 | Isoform 1 of Phospholipid transfer protein precursor | K.ALELVKQEGLR.F                        | 3 | 3.14 | 0.22 | -3.96 |
| IPI00643034 | Isoform 1 of Phospholipid transfer protein precursor | K.DPVASTSNLDM*DFR.G                    | 2 | 4.54 | 0.45 | -4.18 |
| IPI00643034 | Isoform 1 of Phospholipid transfer protein precursor | K.TM*LQIGVM*PM*LNER.T                  | 2 | 5.00 | 0.47 | -7.20 |
| IPI00643034 | Isoform 1 of Phospholipid transfer protein precursor | R.AGALQLLLVGDK.V                       | 2 | 2.03 | 0.24 | -3.01 |
| IPI00643034 | Isoform 1 of Phospholipid transfer protein precursor | R.AGALQLLLVGDKVPHLDM*LLR.A             | 3 | 4.20 | 0.43 | -3.65 |
| IPI00643034 | Isoform 1 of Phospholipid transfer protein precursor | R.AGALQLLLVGDKVPHLDM*LLR.A             | 4 | 3.43 | 0.49 | -2.61 |
| IPI00643034 | Isoform 1 of Phospholipid transfer protein precursor | R.ATYFGSIVLLSPAVIDSPLK.L               | 2 | 5.06 | 0.54 | -5.10 |
| IPI00643034 | Isoform 1 of Phospholipid transfer protein precursor | R.ATYFGSIVLLSPAVIDSPLK.L               | 3 | 6.25 | 0.38 | -4.35 |
| IPI00643034 | Isoform 1 of Phospholipid transfer protein precursor | R.ATYFGSIVLLSPAVIDSPLKLELR.V           | 3 | 3.15 | 0.38 | -3.29 |
| IPI00643034 | Isoform 1 of Phospholipid transfer protein precursor | R.AVEPQLQEEER.M                        | 2 | 3.15 | 0.33 | -2.43 |
| IPI00643034 | Isoform 1 of Phospholipid transfer protein precursor | R.FLEQELETITIPDLR.G                    | 2 | 3.34 | 0.31 | -5.52 |
| IPI00643034 | Isoform 1 of Phospholipid transfer protein precursor | R.FLEQELETITIPDLR.G                    | 3 | 3.34 | 0.28 | -3.36 |
| IPI00643034 | Isoform 1 of Phospholipid transfer protein precursor | R.FLEQELETITIPDLRGK.E                  | 3 | 2.98 | 0.14 | -2.25 |
| IPI00643034 | Isoform 1 of Phospholipid transfer protein precursor | R.IYSNHSALSLALIPLQAPLK.T               | 2 | 5.50 | 0.40 |       |
| IPI00643034 | Isoform 1 of Phospholipid transfer protein precursor | R.IYSNHSALSLALIPLQAPLK.T               | 3 | 3.06 | 0.21 | -5.07 |

|             |                                                           |                                          |   |      |      |       |
|-------------|-----------------------------------------------------------|------------------------------------------|---|------|------|-------|
| IPI00643034 | Isoform 1 of Phospholipid transfer protein precursor      | R.SSVDELVGIDYSLM*KDPVASTSNLDM*DFR.G      | 3 | 6.68 | 0.58 | -3.60 |
| IPI00643034 | Isoform 1 of Phospholipid transfer protein precursor      | R.SSVDELVGIDYSLM*KDPVASTSNLDMDFR.G       | 3 | 5.31 | 0.45 |       |
| IPI00643034 | Isoform 1 of Phospholipid transfer protein precursor      | R.SSVDELVGIDYSLMKDPVASTSNLDM*DFR.G       | 3 | 4.46 | 0.36 |       |
| IPI00643034 | Isoform 1 of Phospholipid transfer protein precursor      | R.SSVDELVGIDYSLMKDPVASTSNLDMDFR.G        | 3 | 3.40 | 0.11 |       |
| IPI00643034 | Isoform 1 of Phospholipid transfer protein precursor      | R.TGLELSRDPAGR.M                         | 3 | 2.25 | 0.16 | -3.19 |
| IPI00643115 | Stathmin 1/oncoprotein 18                                 | K.DLSLEEIQK.K                            | 1 | 2.55 | 0.10 | -1.65 |
| IPI00643115 | Stathmin 1/oncoprotein 18                                 | K.DLSLEEIQK.K                            | 2 | 2.76 | 0.11 | -2.42 |
| IPI00643115 | Stathmin 1/oncoprotein 18                                 | K.DLSLEEIQKK.L                           | 2 | 2.45 | 0.10 | -1.69 |
| IPI00643115 | Stathmin 1/oncoprotein 18                                 | K.SHEAEVLK.Q                             | 2 | 2.82 | 0.08 | 0.07  |
| IPI00643115 | Stathmin 1/oncoprotein 18                                 | R.SKESVPEFPLSPPK.K                       | 2 | 3.37 | 0.41 | -3.97 |
| IPI00643115 | Stathmin 1/oncoprotein 18                                 | R.SKESVPEFPLSPPK.K                       | 3 | 2.60 | 0.18 | -2.08 |
| IPI00643348 | 80 kDa protein                                            | K.SSTGPGEQLR.N                           | 2 | 2.57 | 0.12 | -0.94 |
| IPI00643348 | 80 kDa protein                                            | R.AFQTVVLDPEGDAQIDPNWVVLNQGR.E           | 3 | 4.44 | 0.34 | -4.03 |
| IPI00643348 | 80 kDa protein                                            | R.AVAEPGIQLK.A                           | 1 | 2.29 | 0.16 | -3.43 |
| IPI00643348 | 80 kDa protein                                            | R.AVAEPGIQLK.A                           | 2 | 2.38 | 0.20 | -2.73 |
| IPI00643348 | 80 kDa protein                                            | R.DTDLDGFPDEK.L                          | 2 | 4.14 | 0.42 | -2.92 |
| IPI00643667 | C1q and tumor necrosis factor related protein 3 isoform b | K.SDTSSNHAVLK.L                          | 2 | 3.44 | 0.33 | -2.34 |
| IPI00643667 | C1q and tumor necrosis factor related protein 3 isoform b | K.SLRPDELPHPEVDDLAQITTFWQSPQTGGLPPDCSK.C | 3 | 5.49 | 0.53 | -3.42 |
| IPI00643667 | C1q and tumor necrosis factor related protein 3 isoform b | K.SLRPDELPHPEVDDLAQITTFWQSPQTGGLPPDCSK.C | 4 | 4.03 | 0.38 | -3.24 |
| IPI00643667 | C1q and tumor necrosis factor related protein 3 isoform b | R.FSTFAGFLLFETK.-                        | 2 | 4.56 | 0.41 | -5.91 |
| IPI00643920 | Transketolase                                             | K.AVELAANTK.G                            | 2 | 2.10 | 0.22 | -3.12 |
| IPI00643920 | Transketolase                                             | K.ILATPPQEDAPSVDIANIR.M                  | 2 | 3.89 | 0.49 | -4.14 |
| IPI00643920 | Transketolase                                             | K.ILATPPQEDAPSVDIANIR.M                  | 3 | 3.69 | 0.35 | -3.96 |
| IPI00643920 | Transketolase                                             | K.ISSDLDGHPVPK.Q                         | 3 | 1.84 | 0.22 | -1.54 |
| IPI00643920 | Transketolase                                             | K.LQALKDTANR.L                           | 2 | 3.29 | 0.08 | -1.22 |
| IPI00643920 | Transketolase                                             | K.NM*AEQIQEIYSQIQSK.K                    | 3 | 4.42 | 0.41 | -4.91 |
| IPI00643920 | Transketolase                                             | K.SKDDQVTVIGAGVTLHEALAAAELLK.K           | 3 | 4.78 | 0.47 | -3.38 |
| IPI00643920 | Transketolase                                             | K.SKDDQVTVIGAGVTLHEALAAAELLK.K           | 4 | 3.36 | 0.14 | -2.96 |
| IPI00643920 | Transketolase                                             | R.DAIAQAVR.G                             | 2 | 2.58 | 0.05 | -3.70 |
| IPI00643920 | Transketolase                                             | R.KISSDLDGHPVPK.Q                        | 2 | 3.25 | 0.40 | -3.79 |
| IPI00643920 | Transketolase                                             | R.KLILDSAR.A                             | 2 | 2.48 | 0.10 | -2.16 |
| IPI00643920 | Transketolase                                             | R.LGQSDPAPLQHQM*DIYQK.R                  | 3 | 1.80 | 0.16 | -1.51 |
| IPI00643920 | Transketolase                                             | R.SVPTSTVFYPSDGVATEK.A                   | 2 | 3.81 | 0.38 | -3.36 |

|             |                                                                                    |                                   |   |      |      |       |
|-------------|------------------------------------------------------------------------------------|-----------------------------------|---|------|------|-------|
| IPI00643937 | Methylenetetrahydrofolate dehydrogenase (NADP+ dependent) 1-like                   | K.GSVDLARAVREAASKRSRFQFLYDVQPFF.- | 3 | 2.62 | 0.08 | -8.35 |
| IPI00644025 | Isoform 1 of Synaptic vesicle glycoprotein 2A                                      | R.GGQYFNDFKFIGLR.L                | 2 | 2.97 | 0.34 | 0.87  |
| IPI00644191 | 70 kDa protein                                                                     | K.RIHIGQKAYIVK.N                  | 2 | 3.82 | 0.11 |       |
| IPI00644231 | Isoform 1 of Cytoplasmic FMR1-interacting protein 1                                | R.FCGEVR.R                        | 1 | 1.18 | 0.05 | 0.67  |
| IPI00644346 | ADAMTS-like protein 2 precursor                                                    | K.CYQGTDIVR.G                     | 2 | 2.21 | 0.16 | 0.31  |
| IPI00644346 | ADAMTS-like protein 2 precursor                                                    | R.LVLCM*ELANGKPQTR.S              | 3 | 2.44 | 0.21 | -3.30 |
| IPI00644472 | Isoform 2 of Haloacid dehalogenase-like hydrolase domain-containing protein 2      | K.DGLALGPGPFVTALEYATDTK.A         | 2 | 3.78 | 0.49 | -4.56 |
| IPI00644472 | Isoform 2 of Haloacid dehalogenase-like hydrolase domain-containing protein 2      | K.RKDGLALGPGPFVTALEYATDTK.A       | 3 | 3.79 | 0.36 | -4.30 |
| IPI00644472 | Isoform 2 of Haloacid dehalogenase-like hydrolase domain-containing protein 2      | K.TFFLEALR.G                      | 2 | 3.24 | 0.29 | -1.56 |
| IPI00644472 | Isoform 2 of Haloacid dehalogenase-like hydrolase domain-containing protein 2      | R.KDGLALGPGPFVTALEYATDTK.A        | 3 | 2.79 | 0.22 | -3.39 |
| IPI00644522 | PNKP protein                                                                       | -P.NQILTPPLQSSVELVADPETRTVAVK.Q   | 3 | 2.40 | 0.06 | -0.95 |
| IPI00644766 | cDNA FLJ78048, highly similar to Homo sapiens torsin A interacting protein 1, mRNA | R.SQPAILLTAAR.D                   | 2 | 2.82 | 0.41 | -2.25 |
| IPI00644840 | Hypothetical protein                                                               | R.ETPEAAEGR.R                     | 2 | 1.83 | 0.05 | -2.89 |
| IPI00645078 | Ubiquitin-like modifier-activating enzyme 1                                        | R.LDQPM*TEIVSR.V                  | 2 | 3.45 | 0.27 | -2.55 |
| IPI00645089 | Kv channel interacting protein 1 isoform 3                                         | R.CKLGFKFAQTIFK.L                 | 2 | 1.69 | 0.06 | -4.16 |
| IPI00645194 | integrin beta 1 isoform 1A precursor                                               | K.LKPEDITQIQPQQLVLR.L             | 3 | 3.93 | 0.28 | -1.71 |
| IPI00645206 | Isoform 1 of Protocadherin-17 precursor                                            | K.ALDREQQNHHTLVLTALDGGEPFR.S      | 3 | 4.65 | 0.53 | -4.06 |
| IPI00645206 | Isoform 1 of Protocadherin-17 precursor                                            | K.ILDENDNPPR.F                    | 2 | 3.28 | 0.19 | -1.85 |
| IPI00645206 | Isoform 1 of Protocadherin-17 precursor                                            | K.LIDRNDNAPSIGFVSVR.Q             | 2 | 3.27 | 0.18 | -2.59 |
| IPI00645206 | Isoform 1 of Protocadherin-17 precursor                                            | K.LIDRNDNAPSIGFVSVR.Q             | 3 | 3.41 | 0.38 | -2.84 |
| IPI00645206 | Isoform 1 of Protocadherin-17 precursor                                            | K.SRGDGTKFPELVIQK.A               | 2 | 3.78 | 0.31 | -3.52 |
| IPI00645206 | Isoform 1 of Protocadherin-17 precursor                                            | K.SRGDGTKFPELVIQK.A               | 3 | 3.84 | 0.27 | -3.00 |
| IPI00645206 | Isoform 1 of Protocadherin-17 precursor                                            | K.VTDHGKPTLSAVAK.L                | 2 | 3.24 | 0.39 | -4.16 |
| IPI00645206 | Isoform 1 of Protocadherin-17 precursor                                            | R.DDHGLFGLDVK.S                   | 2 | 2.22 | 0.17 | -2.35 |
| IPI00645206 | Isoform 1 of Protocadherin-17 precursor                                            | R.DDHGLFGLDVK.S                   | 3 | 2.67 | 0.16 | -2.65 |
| IPI00645206 | Isoform 1 of Protocadherin-17 precursor                                            | R.NAGLGYLVSTVR.A                  | 2 | 4.05 | 0.40 | -2.11 |
| IPI00645206 | Isoform 1 of Protocadherin-17 precursor                                            | R.VLENSAPHLLDVDADSGLLYTK.Q        | 3 | 4.70 | 0.47 | -3.03 |
| IPI00645814 | Isoform 2 of MAP7 domain-containing protein 1                                      | R.LMTPTLSFLARSRSAVTLPRNGR.D       | 3 | 3.00 | 0.11 |       |
| IPI00646281 | L1 cell adhesion molecule                                                          | A.VQGSTAYLLCK.A                   | 2 | 2.95 | 0.40 | -1.53 |
| IPI00646281 | L1 cell adhesion molecule                                                          | K.AFGAPVPSVQWLDEDGTTVLQDER.F      | 2 | 5.67 | 0.57 | -5.12 |
| IPI00646281 | L1 cell adhesion molecule                                                          | K.AFGAPVPSVQWLDEDGTTVLQDER.F      | 3 | 4.31 | 0.43 | -4.08 |
| IPI00646281 | L1 cell adhesion molecule                                                          | K.ATNSM*IDR.K                     | 2 | 2.62 | 0.39 | -2.80 |
| IPI00646281 | L1 cell adhesion molecule                                                          | K.DATQITQGPR.S                    | 2 | 2.41 | 0.17 | -3.44 |
| IPI00646281 | L1 cell adhesion molecule                                                          | K.ETVKPVEVEEGESVVLPCNPPPSAEPLR.I  | 3 | 4.57 | 0.37 | -2.08 |
| IPI00646281 | L1 cell adhesion molecule                                                          | K.LSPYVHYTFR.V                    | 2 | 2.34 | 0.24 | -3.07 |

|             |                                            |                                  |   |      |      |       |
|-------------|--------------------------------------------|----------------------------------|---|------|------|-------|
| IPI00646281 | L1 cell adhesion molecule                  | K.VGEEDDGEYR.C                   | 2 | 3.10 | 0.34 | -2.42 |
| IPI00646281 | L1 cell adhesion molecule                  | K.VKDATQITQGPR.S                 | 2 | 3.74 | 0.33 | -2.97 |
| IPI00646281 | L1 cell adhesion molecule                  | K.YGPGESPVSSETVVTPEAAPEK.N       | 2 | 5.13 | 0.48 | -4.39 |
| IPI00646281 | L1 cell adhesion molecule                  | K.YGPGESPVSSETVVTPEAAPEKNPVDVK.G | 3 | 3.68 | 0.36 | -2.97 |
| IPI00646281 | L1 cell adhesion molecule                  | R.AQLLVVGSPPVPR.L                | 2 | 3.58 | 0.26 | -1.96 |
| IPI00646281 | L1 cell adhesion molecule                  | R.CLAENSLGSAR.H                  | 1 | 2.49 | 0.36 | -3.68 |
| IPI00646281 | L1 cell adhesion molecule                  | R.CLAENSLGSAR.H                  | 2 | 3.69 | 0.32 | -1.88 |
| IPI00646281 | L1 cell adhesion molecule                  | R.DLQELGSDSKYFIEDGR.L            | 3 | 3.28 | 0.15 | -2.63 |
| IPI00646281 | L1 cell adhesion molecule                  | R.FQLQATTK.E                     | 1 | 1.98 | 0.06 | -3.22 |
| IPI00646281 | L1 cell adhesion molecule                  | R.GALILSNVQPSDTM*VTQCEAR.N       | 2 | 6.30 | 0.60 | -2.89 |
| IPI00646281 | L1 cell adhesion molecule                  | R.GALILSNVQPSDTM*VTQCEAR.N       | 3 | 3.05 | 0.33 | -3.01 |
| IPI00646281 | L1 cell adhesion molecule                  | R.GDGRDLQELGSDSKYFIEDGR.L        | 3 | 4.17 | 0.43 | -2.69 |
| IPI00646281 | L1 cell adhesion molecule                  | R.GDGRDLQELGSDSKYFIEDGR.L        | 4 | 3.29 | 0.31 | -2.39 |
| IPI00646281 | L1 cell adhesion molecule                  | R.LVLSDLHLLTQSQVR.V              | 2 | 5.14 | 0.48 | -2.16 |
| IPI00646281 | L1 cell adhesion molecule                  | R.LVLSDLHLLTQSQVR.V              | 3 | 4.97 | 0.46 | -2.70 |
| IPI00646281 | L1 cell adhesion molecule                  | R.LVVFPDDISLK.C                  | 2 | 3.10 | 0.35 | -1.20 |
| IPI00646281 | L1 cell adhesion molecule                  | R.RLVVFPDDISLK.C                 | 2 | 4.07 | 0.24 | -4.15 |
| IPI00646281 | L1 cell adhesion molecule                  | R.TIIQKEPIDLR.V                  | 2 | 2.74 | 0.19 | -3.20 |
| IPI00646281 | L1 cell adhesion molecule                  | W.LDEDGTTVLQDER.F                | 2 | 4.24 | 0.39 | -1.62 |
| IPI00646281 | L1 cell adhesion molecule                  | W.SPAEDHNAPIEK.Y                 | 2 | 3.30 | 0.36 | -3.28 |
| IPI00646291 | Integral membrane protein GPR180 precursor | K.LYLFQAQEWLK.L                  | 2 | 4.04 | 0.33 | -3.28 |
| IPI00646291 | Integral membrane protein GPR180 precursor | R.GSFSSTAAQDAQQR.I               | 2 | 3.14 | 0.42 | -2.86 |
| IPI00646304 | peptidylprolyl isomerase B precursor       | K.DFM*IQGGDFTR.G                 | 2 | 3.27 | 0.40 | -3.77 |
| IPI00646304 | peptidylprolyl isomerase B precursor       | K.DTNGSQFFITTVK.T                | 1 | 2.41 | 0.16 | -3.32 |
| IPI00646304 | peptidylprolyl isomerase B precursor       | K.DTNGSQFFITTVK.T                | 2 | 4.58 | 0.42 | -3.89 |
| IPI00646304 | peptidylprolyl isomerase B precursor       | K.DTNGSQFFITTVK.T                | 3 | 4.20 | 0.22 | -2.52 |
| IPI00646304 | peptidylprolyl isomerase B precursor       | K.IEVEKPFIAIKE.-                 | 2 | 4.03 | 0.38 | -2.18 |
| IPI00646304 | peptidylprolyl isomerase B precursor       | K.IEVEKPFIAIKE.-                 | 3 | 2.85 | 0.31 | -2.08 |
| IPI00646304 | peptidylprolyl isomerase B precursor       | K.SIYGERFPDENFK.L                | 2 | 3.24 | 0.26 | -3.59 |
| IPI00646304 | peptidylprolyl isomerase B precursor       | K.SIYGERFPDENFKLK.H              | 2 | 3.42 | 0.26 | -5.00 |
| IPI00646304 | peptidylprolyl isomerase B precursor       | K.TVDNFVALATGEK.G                | 2 | 4.23 | 0.46 | -5.65 |
| IPI00646304 | peptidylprolyl isomerase B precursor       | K.VLEGM*EVVR.K                   | 2 | 3.12 | 0.29 | -0.72 |
| IPI00646304 | peptidylprolyl isomerase B precursor       | R.IGDEDVGR.V                     | 2 | 2.77 | 0.22 | -3.43 |
| IPI00646304 | peptidylprolyl isomerase B precursor       | R.IGDEDVGRVIFGLFGK.T             | 3 | 5.24 | 0.47 | -1.48 |
| IPI00646304 | peptidylprolyl isomerase B precursor       | R.VIKDFM*IQGGDFTR.G              | 2 | 4.11 | 0.45 | -1.17 |
| IPI00646304 | peptidylprolyl isomerase B precursor       | R.VIKDFM*IQGGDFTR.G              | 3 | 2.59 | 0.18 | -2.36 |
| IPI00646304 | peptidylprolyl isomerase B precursor       | R.VIKDFM*IQGGDFTRGDGTGGK.S       | 2 | 2.62 | 0.30 | -3.27 |
| IPI00646689 | Thioredoxin domain-containing protein 17   | K.TIFAYFTGSK.D                   | 1 | 1.72 | 0.21 | -3.13 |
| IPI00646689 | Thioredoxin domain-containing protein 17   | K.TIFAYFTGSK.D                   | 2 | 3.64 | 0.37 | -2.70 |
| IPI00646689 | Thioredoxin domain-containing protein 17   | K.VTAVPTLLK.Y                    | 2 | 2.37 | 0.10 | -1.45 |
| IPI00647027 | 32 kDa protein                             | A.DASEAHSSSRGEAGAPGEEDIQGP.TK.A  | 3 | 5.66 | 0.49 | -3.03 |
| IPI00647027 | 32 kDa protein                             | A.DEPQWSLYPSDSQVSEEVKTR.H        | 2 | 3.95 | 0.47 | -4.22 |

|             |                |                                       |   |      |      |       |
|-------------|----------------|---------------------------------------|---|------|------|-------|
| IPI00647027 | 32 kDa protein | A.PGEEDIQGPTK.A                       | 1 | 3.08 | 0.28 | -3.01 |
| IPI00647027 | 32 kDa protein | A.PGEEDIQGPTKADTEK.W                  | 2 | 4.13 | 0.44 | -2.22 |
| IPI00647027 | 32 kDa protein | C.IIEVLSNALSK.S                       | 2 | 4.12 | 0.31 | -3.04 |
| IPI00647027 | 32 kDa protein | D.PADASEAHESSSRGEAGAPGEEDIQGPTK.A     | 4 | 4.69 | 0.44 | -2.23 |
| IPI00647027 | 32 kDa protein | D.RSSQGGSLPSEEK.G                     | 2 | 3.71 | 0.20 | -3.71 |
| IPI00647027 | 32 kDa protein | G.EAGAPGEEDIQGPTK.A                   | 2 | 3.04 | 0.52 | -4.03 |
| IPI00647027 | 32 kDa protein | K.ADTEKWAEGGGHSR.E                    | 3 | 3.12 | 0.13 | -1.39 |
| IPI00647027 | 32 kDa protein | K.DKETTENENTKFEV.R                    | 3 | 4.29 | 0.44 | -1.33 |
| IPI00647027 | 32 kDa protein | K.DKETTENENTKFEVR.L                   | 2 | 4.76 | 0.44 | -0.61 |
| IPI00647027 | 32 kDa protein | K.DKETTENENTKFEVR.L                   | 3 | 3.50 | 0.31 | -3.94 |
| IPI00647027 | 32 kDa protein | K.DVKDKETTENENTKFEVR.L                | 2 | 5.34 | 0.49 | -2.14 |
| IPI00647027 | 32 kDa protein | K.DVKDKETTENENTKFEVR.L                | 3 | 3.68 | 0.43 | -2.79 |
| IPI00647027 | 32 kDa protein | K.DVKDKETTENENTKFEVR.L                | 4 | 2.92 | 0.27 | -2.28 |
| IPI00647027 | 32 kDa protein | K.GERGEDSSEKHLLEEPGETQNAFLNER.K       | 3 | 6.04 | 0.55 | -3.49 |
| IPI00647027 | 32 kDa protein | K.GERGEDSSEKHLLEEPGETQNAFLNER.K       | 4 | 4.51 | 0.34 | -3.42 |
| IPI00647027 | 32 kDa protein | K.HLEEPGETQNAFLNER.K                  | 2 | 4.61 | 0.49 | -3.31 |
| IPI00647027 | 32 kDa protein | K.HLEEPGETQNAFLNER.K                  | 3 | 4.36 | 0.39 | -2.63 |
| IPI00647027 | 32 kDa protein | K.HLEEPGETQNAFLNERK.Q                 | 3 | 3.62 | 0.45 | -0.85 |
| IPI00647027 | 32 kDa protein | K.KEELVAR.S                           | 1 | 2.17 | 0.06 | -1.71 |
| IPI00647027 | 32 kDa protein | K.KEELVAR.S                           | 2 | 2.51 | 0.12 | -3.72 |
| IPI00647027 | 32 kDa protein | K.QASAIKKEELVA.R                      | 1 | 2.44 | 0.25 | -5.41 |
| IPI00647027 | 32 kDa protein | K.QASAIKKEELVAR.S                     | 2 | 1.87 | 0.30 | -4.70 |
| IPI00647027 | 32 kDa protein | K.SQREDEEEEEGENYQK.G                  | 3 | 2.94 | 0.22 | -3.32 |
| IPI00647027 | 32 kDa protein | K.SQREDEEEEEGENYQKGER.G               | 2 | 5.86 | 0.51 | -4.78 |
| IPI00647027 | 32 kDa protein | K.SQREDEEEEEGENYQKGER.G               | 3 | 5.42 | 0.48 | -4.27 |
| IPI00647027 | 32 kDa protein | K.SSAPPITPECR.Q                       | 2 | 2.82 | 0.35 | -2.47 |
| IPI00647027 | 32 kDa protein | K.SSQESGEETGSQENHPQESK.G              | 2 | 5.08 | 0.55 | -3.97 |
| IPI00647027 | 32 kDa protein | K.SSQESGEETGSQENHPQESK.G              | 3 | 3.75 | 0.46 | -2.47 |
| IPI00647027 | 32 kDa protein | L.LRDPADASEAHESSSR.G                  | 2 | 3.61 | 0.34 | -4.80 |
| IPI00647027 | 32 kDa protein | L.LRDPADASEAHESSSR.G                  | 3 | 4.71 | 0.47 | -3.02 |
| IPI00647027 | 32 kDa protein | L.LRDPADASEAHESSSRGEAGAPGEEDIQGPTK.A  | 4 | 5.05 | 0.49 | -1.88 |
| IPI00647027 | 32 kDa protein | L.RDPADASEAHESSSR.G                   | 3 | 4.33 | 0.48 | -2.11 |
| IPI00647027 | 32 kDa protein | P.ADASEAHESSSRGEAGAPGEEDIQGPTK.A      | 3 | 6.33 | 0.48 | -3.21 |
| IPI00647027 | 32 kDa protein | P.ADASEAHESSSRGEAGAPGEEDIQGPTKADTEK.W | 3 | 7.42 | 0.57 | -3.42 |
| IPI00647027 | 32 kDa protein | P.ADASEAHESSSRGEAGAPGEEDIQGPTKADTEK.W | 4 | 5.75 | 0.52 | -3.42 |
| IPI00647027 | 32 kDa protein | Q.ASAIKKEELVAR.S                      | 2 | 2.95 | 0.20 | -3.93 |
| IPI00647027 | 32 kDa protein | R.ADEPQWSLYPSDSQVSEEVK.T              | 2 | 5.11 | 0.57 | -5.19 |
| IPI00647027 | 32 kDa protein | R.ADEPQWSLYPSDSQVSEEVK.T              | 3 | 3.42 | 0.38 | -3.67 |
| IPI00647027 | 32 kDa protein | R.ADEPQWSLYPSDSQVSEEVKTR              | 2 | 3.85 | 0.44 | 0.40  |
| IPI00647027 | 32 kDa protein | R.ADEPQWSLYPSDSQVSEEVKTR.H            | 2 | 4.16 | 0.53 | -2.09 |
| IPI00647027 | 32 kDa protein | R.ADEPQWSLYPSDSQVSEEVKTR.H            | 3 | 2.84 | 0.25 | -4.21 |
| IPI00647027 | 32 kDa protein | R.CIIEVLSNALSK.S                      | 1 | 3.50 | 0.40 | -2.75 |

|             |                |                                           |   |      |      |       |
|-------------|----------------|-------------------------------------------|---|------|------|-------|
| IPI00647027 | 32 kDa protein | R.CIIEVLSNALSK.S                          | 2 | 5.07 | 0.45 | -5.01 |
| IPI00647027 | 32 kDa protein | R.CIIEVLSNALSK.S                          | 3 | 2.82 | 0.12 | -2.94 |
| IPI00647027 | 32 kDa protein | R.DPADASEAHSSSR.G                         | 2 | 4.67 | 0.62 | -3.44 |
| IPI00647027 | 32 kDa protein | R.DPADASEAHSSSR.G                         | 3 | 2.98 | 0.46 | -1.05 |
| IPI00647027 | 32 kDa protein | R.DPADASEAHSSSRGEAGAPGEEDIQGPTK.A         | 2 | 4.49 | 0.49 | -3.41 |
| IPI00647027 | 32 kDa protein | R.DPADASEAHSSSRGEAGAPGEEDIQGPTK.A         | 3 | 6.54 | 0.57 | -4.11 |
| IPI00647027 | 32 kDa protein | R.DPADASEAHSSSRGEAGAPGEEDIQGPTK.A         | 4 | 4.13 | 0.37 | -2.20 |
| IPI00647027 | 32 kDa protein | R.DPADASEAHSSSRGEAGAPGEEDIQGPTKADTEK.W    | 3 | 8.25 | 0.56 | -2.76 |
| IPI00647027 | 32 kDa protein | R.DPADASEAHSSSRGEAGAPGEEDIQGPTKADTEK.W    | 4 | 5.38 | 0.50 | -2.35 |
| IPI00647027 | 32 kDa protein | R.DPADASEAHSSSRGEAGAPGEEDIQGPTKADTEK.W    | 5 | 2.81 | 0.40 | -2.54 |
| IPI00647027 | 32 kDa protein | R.EKSSQESGEETGSQENHPQESK.G                | 2 | 3.79 | 0.48 | 0.02  |
| IPI00647027 | 32 kDa protein | R.EKSSQESGEETGSQENHPQESK.G                | 3 | 4.67 | 0.55 | -4.75 |
| IPI00647027 | 32 kDa protein | R.EKSSQESGEETGSQENHPQESK.G                | 4 | 2.70 | 0.40 | -1.20 |
| IPI00647027 | 32 kDa protein | R.ERADEPQWSLYPSDSQVSEEVK.T                | 2 | 5.86 | 0.59 | -3.57 |
| IPI00647027 | 32 kDa protein | R.ERADEPQWSLYPSDSQVSEEVK.T                | 3 | 6.88 | 0.56 | -3.63 |
| IPI00647027 | 32 kDa protein | R.ERADEPQWSLYPSDSQVSEEVK.T                | 2 | 4.68 | 0.53 | -3.71 |
| IPI00647027 | 32 kDa protein | R.ERADEPQWSLYPSDSQVSEEVK.T                | 3 | 5.58 | 0.48 | -2.50 |
| IPI00647027 | 32 kDa protein | R.GEAGAPGEEDIQGPTK.A                      | 1 | 3.46 | 0.37 | -4.04 |
| IPI00647027 | 32 kDa protein | R.GEAGAPGEEDIQGPTK.A                      | 2 | 4.62 | 0.41 | -3.60 |
| IPI00647027 | 32 kDa protein | R.GEAGAPGEEDIQGPTK.A                      | 3 | 3.49 | 0.32 | -1.94 |
| IPI00647027 | 32 kDa protein | R.GEAGAPGEEDIQGPTK.A.D                    | 2 | 4.12 | 0.42 | -4.69 |
| IPI00647027 | 32 kDa protein | R.GEAGAPGEEDIQGPTKADTE.K                  | 2 | 3.51 | 0.48 | -4.04 |
| IPI00647027 | 32 kDa protein | R.GEAGAPGEEDIQGPTKADTEK.W                 | 2 | 4.96 | 0.52 | -3.58 |
| IPI00647027 | 32 kDa protein | R.GEAGAPGEEDIQGPTKADTEK.W                 | 3 | 1.62 | 0.20 | -2.24 |
| IPI00647027 | 32 kDa protein | R.GEDSSEEKHLEEPGETQNAFLNER.K              | 2 | 4.71 | 0.53 | -3.26 |
| IPI00647027 | 32 kDa protein | R.GEDSSEEKHLEEPGETQNAFLNER.K              | 3 | 6.62 | 0.55 | -2.34 |
| IPI00647027 | 32 kDa protein | R.GEDSSEEKHLEEPGETQNAFLNER.K              | 4 | 3.92 | 0.41 | -2.81 |
| IPI00647027 | 32 kDa protein | R.KDVKDKETTENTKFEV.R                      | 3 | 3.97 | 0.28 | -3.07 |
| IPI00647027 | 32 kDa protein | R.KQASAIKKEELV.A                          | 1 | 3.01 | 0.26 | -5.37 |
| IPI00647027 | 32 kDa protein | R.KQASAIKKEELV.A                          | 2 | 3.47 | 0.30 | -3.60 |
| IPI00647027 | 32 kDa protein | R.KQASAIKKEELVA.R                         | 2 | 3.63 | 0.45 | -4.46 |
| IPI00647027 | 32 kDa protein | R.KQASAIKKEELVAR.S                        | 2 | 5.16 | 0.39 | -4.06 |
| IPI00647027 | 32 kDa protein | R.KQASAIKKEELVAR.S                        | 3 | 3.22 | 0.29 | -2.77 |
| IPI00647027 | 32 kDa protein | R.LLRDPADASEAHSSSR.G                      | 2 | 4.54 | 0.45 | -5.12 |
| IPI00647027 | 32 kDa protein | R.LLRDPADASEAHSSSR.G                      | 3 | 5.11 | 0.50 | -3.98 |
| IPI00647027 | 32 kDa protein | R.LLRDPADASEAHSSSR.G                      | 4 | 3.74 | 0.39 | -1.77 |
| IPI00647027 | 32 kDa protein | R.LLRDPADASEAHSSSRGEAGAPGEEDIQGPTK.A      | 3 | 5.00 | 0.57 | -4.33 |
| IPI00647027 | 32 kDa protein | R.LLRDPADASEAHSSSRGEAGAPGEEDIQGPTK.A      | 4 | 5.84 | 0.48 | -3.68 |
| IPI00647027 | 32 kDa protein | R.LLRDPADASEAHSSSRGEAGAPGEEDIQGPTKADTEK.W | 4 | 6.22 | 0.56 | -3.54 |
| IPI00647027 | 32 kDa protein | R.SQEESSEEGEEDATSEVDKRR.R                 | 3 | 3.22 | 0.21 | -3.59 |
| IPI00647027 | 32 kDa protein | R.SQEESSEEGEEDATSEVDKRR.T                 | 2 | 4.53 | 0.48 | -2.17 |
| IPI00647027 | 32 kDa protein | R.SQEESSEEGEEDATSEVDKRR.T                 | 3 | 3.29 | 0.32 | -2.40 |



|             |                                                                                       |                                                |   |      |      |       |
|-------------|---------------------------------------------------------------------------------------|------------------------------------------------|---|------|------|-------|
| IPI00647027 | 32 kDa protein                                                                        | R.SQEESEEGEEDATSEVDKRR.T                       | 4 | 4.09 | 0.38 | -1.75 |
| IPI00647027 | 32 kDa protein                                                                        | R.SSQGGSLPSEEK.G                               | 1 | 2.14 | 0.09 | -3.35 |
| IPI00647027 | 32 kDa protein                                                                        | R.SSQGGSLPSEEK.G                               | 2 | 3.96 | 0.33 | -3.27 |
| IPI00647027 | 32 kDa protein                                                                        | R.SSQGGSLPSEEEKGHPQ.E                          | 2 | 3.81 | 0.45 | -2.91 |
| IPI00647027 | 32 kDa protein                                                                        | S.DSQVSEEVK.T                                  | 2 | 3.03 | 0.16 | -2.29 |
| IPI00647027 | 32 kDa protein                                                                        | S.DSQVSEEVKTR.H                                | 2 | 3.23 | 0.28 | -2.37 |
| IPI00647027 | 32 kDa protein                                                                        | W.SLYPSDSQVSEEVK.T                             | 2 | 4.04 | 0.49 | -4.37 |
| IPI00647027 | 32 kDa protein                                                                        | W.SLYPSDSQVSEEVKTR.H                           | 2 | 4.28 | 0.50 | -3.74 |
| IPI00647027 | 32 kDa protein                                                                        | Y.PSDSQVSEEVK.T                                | 2 | 4.53 | 0.43 | -2.32 |
| IPI00647027 | 32 kDa protein                                                                        | Y.PSDSQVSEEVKTR.H                              | 3 | 3.68 | 0.35 | -0.45 |
| IPI00647217 | Superkiller viralicidic activity 2-like 2                                             | K.TVCAEYAIALALREKQR.V                          | 2 | 2.27 | 0.20 |       |
| IPI00647704 | CDNA FLJ41552 fis, clone COLON2004478, highly similar to Protein Tro alpha1 H,myeloma | K.GDTFSCMVGHEALPLAFTQK.T                       | 2 | 4.19 | 0.19 |       |
| IPI00647704 | CDNA FLJ41552 fis, clone COLON2004478, highly similar to Protein Tro alpha1 H,myeloma | K.KGDTFSCM*VGHEALPLAFTQK.T                     | 2 | 4.91 | 0.41 |       |
| IPI00647704 | CDNA FLJ41552 fis, clone COLON2004478, highly similar to Protein Tro alpha1 H,myeloma | K.KGDTFSCM*VGHEALPLAFTQK.T                     | 3 | 3.90 | 0.44 | -2.10 |
| IPI00647704 | CDNA FLJ41552 fis, clone COLON2004478, highly similar to Protein Tro alpha1 H,myeloma | K.SAVQGPPDR.D                                  | 2 | 2.59 | 0.20 |       |
| IPI00647704 | CDNA FLJ41552 fis, clone COLON2004478, highly similar to Protein Tro alpha1 H,myeloma | K.SAVQGPPDRDLGCGYSVSVLPGCAEPWNHGK.T            | 3 | 6.00 | 0.36 |       |
| IPI00647704 | CDNA FLJ41552 fis, clone COLON2004478, highly similar to Protein Tro alpha1 H,myeloma | K.SGNTFRPEVHLLPPPSEELALNELVTLTCLAR.G           | 2 | 4.32 | 0.41 |       |
| IPI00647704 | CDNA FLJ41552 fis, clone COLON2004478, highly similar to Protein Tro alpha1 H,myeloma | K.SGNTFRPEVHLLPPPSEELALNELVTLTCLAR.G           | 3 | 6.86 | 0.60 |       |
| IPI00647704 | CDNA FLJ41552 fis, clone COLON2004478, highly similar to Protein Tro alpha1 H,myeloma | K.TFTCTAAYPESK.T                               | 1 | 2.27 | 0.26 |       |
| IPI00647704 | CDNA FLJ41552 fis, clone COLON2004478, highly similar to Protein Tro alpha1 H,myeloma | K.TFTCTAAYPESK.T                               | 2 | 4.10 | 0.40 |       |
| IPI00647704 | CDNA FLJ41552 fis, clone COLON2004478, highly similar to Protein Tro alpha1 H,myeloma | K.TFTCTAAYPESKPLTATLSK.S                       | 2 | 4.13 | 0.39 |       |
| IPI00647704 | CDNA FLJ41552 fis, clone COLON2004478, highly similar to Protein Tro alpha1 H,myeloma | K.TFTCTAAYPESKPLTATLSK.S                       | 3 | 4.01 | 0.44 |       |
| IPI00647704 | CDNA FLJ41552 fis, clone COLON2004478, highly similar to Protein Tro alpha1 H,myeloma | K.TPLTATLSK.S                                  | 1 | 2.18 | 0.20 |       |
| IPI00647704 | CDNA FLJ41552 fis, clone COLON2004478, highly similar to Protein Tro alpha1 H,myeloma | K.TPLTATLSK.S                                  | 2 | 2.50 | 0.14 |       |
| IPI00647704 | CDNA FLJ41552 fis, clone COLON2004478, highly similar to Protein Tro alpha1 H,myeloma | K.VFPLSLCSTQPDGNVVIACLQVGFQPEPLSVTWSESGQGVAR.N | 3 | 3.85 | 0.24 |       |
| IPI00647704 | CDNA FLJ41552 fis, clone COLON2004478, highly similar to Protein Tro alpha1 H,myeloma | K.YLTWASR.Q                                    | 1 | 1.98 | 0.18 |       |

|             |                                                                                       |                                    |   |      |      |       |
|-------------|---------------------------------------------------------------------------------------|------------------------------------|---|------|------|-------|
| IPI00647704 | CDNA FLJ41552 fis, clone COLON2004478, highly similar to Protein Tro alpha1 H,myeloma | K.YLTWASR.Q                        | 2 | 1.93 | 0.24 |       |
| IPI00647704 | CDNA FLJ41552 fis, clone COLON2004478, highly similar to Protein Tro alpha1 H,myeloma | Q.EPSQGTTFVAVTSILR.V               | 2 | 3.82 | 0.43 | -5.84 |
| IPI00647704 | CDNA FLJ41552 fis, clone COLON2004478, highly similar to Protein Tro alpha1 H,myeloma | R.DASGVFTFTWTPSSGK.S               | 1 | 3.53 | 0.45 |       |
| IPI00647704 | CDNA FLJ41552 fis, clone COLON2004478, highly similar to Protein Tro alpha1 H,myeloma | R.DASGVFTFTWTPSSGK.S               | 2 | 5.30 | 0.49 |       |
| IPI00647704 | CDNA FLJ41552 fis, clone COLON2004478, highly similar to Protein Tro alpha1 H,myeloma | R.DLCGCYSVSSVLPGCAEPWNHGK.T        | 2 | 4.99 | 0.09 |       |
| IPI00647704 | CDNA FLJ41552 fis, clone COLON2004478, highly similar to Protein Tro alpha1 H,myeloma | R.DLCGCYSVSSVLPGCAEPWNHGK.T        | 3 | 3.41 | 0.09 |       |
| IPI00647704 | CDNA FLJ41552 fis, clone COLON2004478, highly similar to Protein Tro alpha1 H,myeloma | R.EKYLTWASR.Q                      | 1 | 2.49 | 0.27 |       |
| IPI00647704 | CDNA FLJ41552 fis, clone COLON2004478, highly similar to Protein Tro alpha1 H,myeloma | R.GFSPKDVLR.W                      | 2 | 2.81 | 0.13 |       |
| IPI00647704 | CDNA FLJ41552 fis, clone COLON2004478, highly similar to Protein Tro alpha1 H,myeloma | R.GTLVSVSASPTSPK.V                 | 2 | 3.48 | 0.07 |       |
| IPI00647704 | CDNA FLJ41552 fis, clone COLON2004478, highly similar to Protein Tro alpha1 H,myeloma | R.NFPPSQDASGDLYTTSSQLTLPATQCLAGK.S | 2 | 4.34 | 0.48 |       |
| IPI00647704 | CDNA FLJ41552 fis, clone COLON2004478, highly similar to Protein Tro alpha1 H,myeloma | R.NFPPSQDASGDLYTTSSQLTLPATQCLAGK.S | 3 | 5.77 | 0.57 |       |
| IPI00647704 | CDNA FLJ41552 fis, clone COLON2004478, highly similar to Protein Tro alpha1 H,myeloma | R.QEPSQGTTFVAVTSILR.V              | 2 | 4.27 | 0.52 |       |
| IPI00647704 | CDNA FLJ41552 fis, clone COLON2004478, highly similar to Protein Tro alpha1 H,myeloma | R.QEPSQGTTFVAVTSILR.V              | 3 | 4.05 | 0.27 |       |
| IPI00647704 | CDNA FLJ41552 fis, clone COLON2004478, highly similar to Protein Tro alpha1 H,myeloma | R.VAAEDWK.K                        | 2 | 2.23 | 0.16 |       |
| IPI00647704 | CDNA FLJ41552 fis, clone COLON2004478, highly similar to Protein Tro alpha1 H,myeloma | R.WLQGSQELPR.E                     | 1 | 3.00 | 0.19 |       |
| IPI00647704 | CDNA FLJ41552 fis, clone COLON2004478, highly similar to Protein Tro alpha1 H,myeloma | R.WLQGSQELPR.E                     | 2 | 3.80 | 0.33 |       |
| IPI00647704 | CDNA FLJ41552 fis, clone COLON2004478, highly similar to Protein Tro alpha1 H,myeloma | R.WLQGSQELPREK.Y                   | 2 | 2.71 | 0.15 |       |
| IPI00654755 | Hemoglobin subunit beta                                                               | K.EFTPPVQAAYQK.V                   | 1 | 2.97 | 0.20 |       |
| IPI00654755 | Hemoglobin subunit beta                                                               | K.EFTPPVQAAYQK.V                   | 2 | 2.45 | 0.23 | -4.45 |
| IPI00654755 | Hemoglobin subunit beta                                                               | K.GTFATLSELHCDK.L                  | 2 | 3.48 | 0.30 |       |
| IPI00654755 | Hemoglobin subunit beta                                                               | K.GTFATLSELHCDKLHVDPENFR.L         | 2 | 4.25 | 0.40 |       |
| IPI00654755 | Hemoglobin subunit beta                                                               | K.GTFATLSELHCDKLHVDPENFR.L         | 3 | 4.97 | 0.36 |       |
| IPI00654755 | Hemoglobin subunit beta                                                               | K.KVLGAFSDGLAHLNLIK.G              | 2 | 4.26 | 0.50 | -1.25 |
| IPI00654755 | Hemoglobin subunit beta                                                               | K.KVLGAFSDGLAHLNLIK.G              | 3 | 3.91 | 0.42 | -1.46 |
| IPI00654755 | Hemoglobin subunit beta                                                               | K.VLGAFSGLAHLNLIK.G                | 2 | 4.35 | 0.34 | -3.24 |

|             |                                    |                                   |   |      |      |       |
|-------------|------------------------------------|-----------------------------------|---|------|------|-------|
| IPI00654755 | Hemoglobin subunit beta            | K.VLGAFSFDGLAHLDNLK.G             | 3 | 2.76 | 0.25 | -2.32 |
| IPI00654755 | Hemoglobin subunit beta            | K.VNVDEVGGEALGR.L                 | 1 | 2.60 | 0.40 | -3.35 |
| IPI00654755 | Hemoglobin subunit beta            | K.VNVDEVGGEALGR.L                 | 2 | 4.50 | 0.47 | -3.55 |
| IPI00654755 | Hemoglobin subunit beta            | K.VNVDEVGGEALGR.L                 | 3 | 3.79 | 0.12 | -3.28 |
| IPI00654755 | Hemoglobin subunit beta            | K.VVAGVANALAHK.Y                  | 2 | 3.48 | 0.45 | -3.17 |
| IPI00654755 | Hemoglobin subunit beta            | K.VVAGVANALAHKYH.-                | 2 | 3.72 | 0.44 | -4.65 |
| IPI00654755 | Hemoglobin subunit beta            | K.VVAGVANALAHKYH.-                | 3 | 2.08 | 0.15 | -2.19 |
| IPI00654755 | Hemoglobin subunit beta            | R.FFESFGDLSTPDAVM*GNPK.V          | 2 | 5.30 | 0.57 | -3.36 |
| IPI00654755 | Hemoglobin subunit beta            | R.FFESFGDLSTPDAVM*GNPK.V          | 3 | 4.93 | 0.38 |       |
| IPI00654755 | Hemoglobin subunit beta            | R.FFESFGDLSTPDAVMGNPK.V           | 2 | 5.66 | 0.58 | -4.50 |
| IPI00654755 | Hemoglobin subunit beta            | R.LLVVYPWTQR.F                    | 2 | 3.24 | 0.30 | -6.61 |
| IPI00654755 | Hemoglobin subunit beta            | R.LLVVYPWTQRFFESFGDLSTPDAVMGNPK.V | 3 | 2.77 | 0.16 | -7.39 |
| IPI00654888 | Plasma kallikrein precursor        | K.DSVTGTLPK.V                     | 2 | 2.99 | 0.09 | -0.67 |
| IPI00654888 | Plasma kallikrein precursor        | K.EIIHQNYK.V                      | 1 | 2.29 | 0.16 | -5.43 |
| IPI00654888 | Plasma kallikrein precursor        | K.EKGEIQNILQK.V                   | 2 | 3.36 | 0.28 | -2.66 |
| IPI00654888 | Plasma kallikrein precursor        | K.GVNVQCETCTK.M                   | 2 | 3.60 | 0.51 | -2.31 |
| IPI00654888 | Plasma kallikrein precursor        | K.TQSSDGKAQM*QSPA.-               | 2 | 4.02 | 0.43 | -4.56 |
| IPI00654888 | Plasma kallikrein precursor        | K.VAEYM*DWILEK.T                  | 2 | 3.80 | 0.37 | -0.45 |
| IPI00654888 | Plasma kallikrein precursor        | K.VAEYMDWILEK.T                   | 2 | 2.93 | 0.33 |       |
| IPI00654888 | Plasma kallikrein precursor        | K.VNIPLVTNEECQKR.Y                | 2 | 3.37 | 0.32 |       |
| IPI00654888 | Plasma kallikrein precursor        | K.VSEGNHDIALIK.L                  | 2 | 2.80 | 0.20 | -3.03 |
| IPI00654888 | Plasma kallikrein precursor        | R.CLLFSFLPASSINDM*EK.R            | 2 | 4.62 | 0.44 | -4.55 |
| IPI00654888 | Plasma kallikrein precursor        | R.CLLFSFLPASSINDM*EKR.F           | 2 | 3.02 | 0.30 | -3.41 |
| IPI00654888 | Plasma kallikrein precursor        | R.CLLFSFLPASSINDM*EKR.F           | 3 | 3.01 | 0.23 | -3.90 |
| IPI00654888 | Plasma kallikrein precursor        | R.CQFFSYATQTFHK.A                 | 3 | 2.57 | 0.19 | -3.05 |
| IPI00654888 | Plasma kallikrein precursor        | R.GGDVASM*YTPNAQYQCM*R.C          | 2 | 4.83 | 0.60 | -3.87 |
| IPI00654888 | Plasma kallikrein precursor        | R.GGDVASM*YTPNAQYQCM*R.C          | 3 | 5.01 | 0.34 |       |
| IPI00654888 | Plasma kallikrein precursor        | R.IAYGTQGSSGYSRL.L                | 2 | 4.09 | 0.48 | -1.65 |
| IPI00654888 | Plasma kallikrein precursor        | R.IYSGILNLSDITKDTPFQIK.E          | 3 | 3.31 | 0.28 | -3.61 |
| IPI00654888 | Plasma kallikrein precursor        | R.LCNTGDNSVCTTK.T                 | 2 | 3.54 | 0.34 | -3.57 |
| IPI00654888 | Plasma kallikrein precursor        | R.LSM*DGSPTR.I                    | 2 | 2.70 | 0.15 | -2.86 |
| IPI00654888 | Plasma kallikrein precursor        | R.M*VCAGYK.E                      | 2 | 2.27 | 0.19 |       |
| IPI00654888 | Plasma kallikrein precursor        | R.REQPGVYTK.V                     | 2 | 2.45 | 0.28 | -2.12 |
| IPI00654888 | Plasma kallikrein precursor        | R.TGAVSGHSLK.Q                    | 1 | 2.05 | 0.26 | -2.78 |
| IPI00654888 | Plasma kallikrein precursor        | R.TGAVSGHSLK.Q                    | 2 | 2.96 | 0.27 | -3.06 |
| IPI00655702 | Isoform 5 of Neurofascin precursor | A.IEIPM*DPSIQNELTQPPTITK.Q        | 2 | 4.08 | 0.33 | -5.69 |
| IPI00655702 | Isoform 5 of Neurofascin precursor | A.IEIPM*DPSIQNELTQPPTITK.Q        | 3 | 5.49 | 0.37 | -4.35 |
| IPI00655702 | Isoform 5 of Neurofascin precursor | C.VASTELDQLAK.A                   | 2 | 3.06 | 0.26 | -0.59 |
| IPI00655702 | Isoform 5 of Neurofascin precursor | F.RVIAINEVGSSHPSLPSER.Y           | 3 | 3.81 | 0.34 | -3.64 |
| IPI00655702 | Isoform 5 of Neurofascin precursor | K.AAPYWLDEPKNLILAPGEDGR.L         | 2 | 4.06 | 0.39 | -3.92 |
| IPI00655702 | Isoform 5 of Neurofascin precursor | K.AKFENFNK.A                      | 2 | 2.12 | 0.09 | -2.89 |
| IPI00655702 | Isoform 5 of Neurofascin precursor | K.AQAQIQLTDLYPGM*TYTLR.V          | 2 | 5.34 | 0.56 | -3.98 |

|             |                                    |                                                    |   |      |      |       |
|-------------|------------------------------------|----------------------------------------------------|---|------|------|-------|
| IPI00655702 | Isoform 5 of Neurofascin precursor | K.AQAQIQLTDLYPGM*TYTLR.V                           | 3 | 3.40 | 0.16 | -2.96 |
| IPI00655702 | Isoform 5 of Neurofascin precursor | K.AYLTVLGRPDRPR.D                                  | 3 | 2.20 | 0.10 | -1.26 |
| IPI00655702 | Isoform 5 of Neurofascin precursor | K.EDDSLTFIFGVAER.D                                 | 2 | 4.02 | 0.40 | -4.17 |
| IPI00655702 | Isoform 5 of Neurofascin precursor | K.EFTTPEGVPSAPR.R                                  | 2 | 3.33 | 0.38 | -2.90 |
| IPI00655702 | Isoform 5 of Neurofascin precursor | K.ENLDPVVVQEGAPLTLQCNPPPGLPSPVIFWM*SSSM*EPITQDKR.V | 4 | 3.32 | 0.16 | -7.39 |
| IPI00655702 | Isoform 5 of Neurofascin precursor | K.FGTALSNR.I                                       | 1 | 1.84 | 0.08 | -2.90 |
| IPI00655702 | Isoform 5 of Neurofascin precursor | K.FGTALSNR.I                                       | 2 | 2.29 | 0.20 | -3.34 |
| IPI00655702 | Isoform 5 of Neurofascin precursor | K.GGDLPSDKAK.F                                     | 2 | 2.36 | 0.05 | -1.37 |
| IPI00655702 | Isoform 5 of Neurofascin precursor | K.GRPDRPRDLELTDLAER.S                              | 4 | 3.27 | 0.20 | -2.52 |
| IPI00655702 | Isoform 5 of Neurofascin precursor | K.KEDDSLTFIFGVAER.D                                | 3 | 3.42 | 0.15 | 0.13  |
| IPI00655702 | Isoform 5 of Neurofascin precursor | K.LTVSWLKDDEPLYIGNR.M                              | 2 | 5.04 | 0.45 | -3.74 |
| IPI00655702 | Isoform 5 of Neurofascin precursor | K.LTVSWLKDDEPLYIGNR.M                              | 3 | 5.39 | 0.43 | -2.28 |
| IPI00655702 | Isoform 5 of Neurofascin precursor | K.NLILAPGEDGR.L                                    | 1 | 2.33 | 0.21 | -3.04 |
| IPI00655702 | Isoform 5 of Neurofascin precursor | K.NLILAPGEDGR.L                                    | 2 | 2.67 | 0.12 | -2.58 |
| IPI00655702 | Isoform 5 of Neurofascin precursor | K.YPGSVNSAVLR.L                                    | 1 | 2.22 | 0.25 | -3.47 |
| IPI00655702 | Isoform 5 of Neurofascin precursor | K.YPGSVNSAVLR.L                                    | 2 | 3.22 | 0.33 | -1.52 |
| IPI00655702 | Isoform 5 of Neurofascin precursor | R.ANGNPKPTVQWM*VNGEPLQSAPPNPNREVAGDTIIFR.D         | 4 | 3.48 | 0.21 | -3.58 |
| IPI00655702 | Isoform 5 of Neurofascin precursor | R.DLELTDLAER.S                                     | 1 | 2.84 | 0.22 | -4.11 |
| IPI00655702 | Isoform 5 of Neurofascin precursor | R.DLELTDLAER.S                                     | 2 | 3.65 | 0.31 | -4.60 |
| IPI00655702 | Isoform 5 of Neurofascin precursor | R.DNILIECEAK.G                                     | 2 | 3.39 | 0.28 | -3.81 |
| IPI00655702 | Isoform 5 of Neurofascin precursor | R.DQGSYTCVASTELDQDLAK.A                            | 2 | 7.00 | 0.59 | -3.32 |
| IPI00655702 | Isoform 5 of Neurofascin precursor | R.DQGSYTCVASTELDQDLAK.A                            | 3 | 4.18 | 0.48 | -3.40 |
| IPI00655702 | Isoform 5 of Neurofascin precursor | R.EVAGDTIIFR.D                                     | 1 | 2.83 | 0.29 | -2.15 |
| IPI00655702 | Isoform 5 of Neurofascin precursor | R.EVAGDTIIFR.D                                     | 2 | 1.94 | 0.11 | -2.47 |
| IPI00655702 | Isoform 5 of Neurofascin precursor | R.EVAGDTIIFRDTQISSR.A                              | 2 | 2.81 | 0.18 | -1.92 |
| IPI00655702 | Isoform 5 of Neurofascin precursor | R.EVAGDTIIFRDTQISSR.A                              | 3 | 2.41 | 0.18 | -1.92 |
| IPI00655702 | Isoform 5 of Neurofascin precursor | R.FHFTHTIQQK.N                                     | 2 | 2.80 | 0.30 | -3.01 |
| IPI00655702 | Isoform 5 of Neurofascin precursor | R.GM*DLLLECIASGVPTPDIAWYK.K                        | 2 | 4.83 | 0.46 | -4.12 |
| IPI00655702 | Isoform 5 of Neurofascin precursor | R.GM*DLLLECIASGVPTPDIAWYK.K                        | 3 | 3.29 | 0.20 | -4.49 |
| IPI00655702 | Isoform 5 of Neurofascin precursor | R.GM*DLLLECIASGVPTPDIAWYK.K                        | 2 | 4.30 | 0.53 | -4.31 |
| IPI00655702 | Isoform 5 of Neurofascin precursor | R.GM*DLLLECIASGVPTPDIAWYK.K                        | 3 | 4.79 | 0.48 | -4.02 |
| IPI00655702 | Isoform 5 of Neurofascin precursor | R.GMDLLLECIASGVPTPDIAWYK.K                         | 3 | 3.52 | 0.35 | -3.68 |
| IPI00655702 | Isoform 5 of Neurofascin precursor | R.GTTVQLECR.V                                      | 2 | 2.51 | 0.19 | -0.97 |
| IPI00655702 | Isoform 5 of Neurofascin precursor | R.ITNVSEEDSGEYFCLASNK.M                            | 2 | 6.35 | 0.61 | -4.36 |
| IPI00655702 | Isoform 5 of Neurofascin precursor | R.ITNVSEEDSGEYFCLASNK.M                            | 3 | 3.19 | 0.36 | -2.50 |
| IPI00655702 | Isoform 5 of Neurofascin precursor | R.IYRM*PEDQVAR.R                                   | 3 | 2.81 | 0.18 | -2.90 |
| IPI00655702 | Isoform 5 of Neurofascin precursor | R.KEDQGIYTCVATNILGK.A                              | 2 | 4.44 | 0.40 | -3.92 |
| IPI00655702 | Isoform 5 of Neurofascin precursor | R.LDCPFFGSPITLR.W                                  | 2 | 3.63 | 0.41 | 0.22  |
| IPI00655702 | Isoform 5 of Neurofascin precursor | R.LSPYVNYQFR.V                                     | 1 | 2.20 | 0.20 | -3.40 |
| IPI00655702 | Isoform 5 of Neurofascin precursor | R.LSPYVNYQFR.V                                     | 2 | 2.96 | 0.44 | -2.72 |
| IPI00655702 | Isoform 5 of Neurofascin precursor | R.LTWIPGDANNSPITDYVVQFEEDQFQPGVWHDHSK.Y            | 4 | 3.11 | 0.25 | -3.67 |
| IPI00655702 | Isoform 5 of Neurofascin precursor | R.M*KKEDDSLTFIFGVAER.D                             | 2 | 5.17 | 0.51 | -3.80 |

|             |                                                            |                                    |   |      |      |       |
|-------------|------------------------------------------------------------|------------------------------------|---|------|------|-------|
| IPI00655702 | Isoform 5 of Neurofascin precursor                         | R.M*PEDQVAR.R                      | 2 | 2.81 | 0.26 | -2.71 |
| IPI00655702 | Isoform 5 of Neurofascin precursor                         | R.SETKEFTTPEGVPSAPR.R              | 3 | 2.53 | 0.10 | -3.16 |
| IPI00655702 | Isoform 5 of Neurofascin precursor                         | R.SGGRPEEYEGEYQCFAR.N              | 3 | 3.19 | 0.30 | -1.96 |
| IPI00655702 | Isoform 5 of Neurofascin precursor                         | R.SGTLVIDFR.S                      | 1 | 1.61 | 0.06 | -3.58 |
| IPI00655702 | Isoform 5 of Neurofascin precursor                         | R.SGTLVIDFR.S                      | 2 | 2.68 | 0.23 | -6.00 |
| IPI00655702 | Isoform 5 of Neurofascin precursor                         | R.TPSFM*YPQGTASSQM*VLR.G           | 2 | 4.64 | 0.51 | -3.64 |
| IPI00655702 | Isoform 5 of Neurofascin precursor                         | R.TPSFM*YPQGTASSQM*VLR.G           | 3 | 4.23 | 0.37 | -3.47 |
| IPI00655702 | Isoform 5 of Neurofascin precursor                         | R.TSGAPPESNPGDVK.G                 | 2 | 2.88 | 0.27 | -2.95 |
| IPI00655702 | Isoform 5 of Neurofascin precursor                         | R.TSGAPPESNPGDVKGEGTR.K            | 2 | 4.49 | 0.53 | -3.13 |
| IPI00655702 | Isoform 5 of Neurofascin precursor                         | R.TSGAPPESNPGDVKGEGTRK.N           | 2 | 4.02 | 0.50 | -2.22 |
| IPI00655702 | Isoform 5 of Neurofascin precursor                         | R.TSGAPPESNPGDVKGEGTRK.N           | 4 | 2.72 | 0.31 | -1.23 |
| IPI00655702 | Isoform 5 of Neurofascin precursor                         | R.VIAINEVGSSHPSLPSER.Y             | 2 | 4.76 | 0.48 | -4.22 |
| IPI00655702 | Isoform 5 of Neurofascin precursor                         | R.VIAINEVGSSHPSLPSER.Y             | 3 | 3.16 | 0.34 | -2.98 |
| IPI00655702 | Isoform 5 of Neurofascin precursor                         | R.VQAENDFGKGPEPESVIGYSGEDYPR.A     | 3 | 5.75 | 0.47 | -2.62 |
| IPI00655702 | Isoform 5 of Neurofascin precursor                         | R.VSQGHNGDLYFSNVM*LQDM*QTDYSCNAR.F | 3 | 7.42 | 0.61 | -3.33 |
| IPI00655702 | Isoform 5 of Neurofascin precursor                         | R.YRTSGAPPESNPGDVKGEGTR.K          | 3 | 4.48 | 0.39 | -2.89 |
| IPI00655702 | Isoform 5 of Neurofascin precursor                         | R.YVVGQTPVYVPYEUR.V                | 2 | 4.79 | 0.42 | -3.80 |
| IPI00655702 | Isoform 5 of Neurofascin precursor                         | W.LKDDEPLYIGNR.M                   | 2 | 3.77 | 0.30 | -1.91 |
| IPI00655702 | Isoform 5 of Neurofascin precursor                         | W.M*VNGEPLQSAPPNPNR.E              | 2 | 3.85 | 0.40 | -1.22 |
| IPI00657699 | Protein                                                    | R.TEIKSDIMGESSR.T                  | 2 | 1.34 | 0.17 | 0.38  |
| IPI00657742 | Major histocompatibility complex, class I, F               | K.WAAVVVPSGEEQR.Y                  | 2 | 3.88 | 0.35 | -3.20 |
| IPI00657742 | Major histocompatibility complex, class I, F               | R.VPGAFTEHAYDGK.D                  | 2 | 1.56 | 0.12 | -0.35 |
| IPI00657742 | Major histocompatibility complex, class I, F               | R.YLENGKETLQR.A                    | 2 | 3.29 | 0.27 | -3.30 |
| IPI00657742 | Major histocompatibility complex, class I, F               | R.YLENGKETLQR.A                    | 3 | 2.43 | 0.22 | -3.37 |
| IPI00657936 | collagen, type XXVIII precursor                            | R.VALDLATAR.I                      | 2 | 3.06 | 0.11 | -3.36 |
| IPI00658025 | Putative novel transcript                                  | -.MGSSRGSAPGRQRNPSLLPLR.E          | 2 | 2.88 | 0.06 |       |
| IPI00658112 | 32 kDa protein                                             | K.RFQKTGHSRRAFGRLLTHVFRSCR.K       | 3 | 2.98 | 0.13 |       |
| IPI00718806 | arylhydrocarbon receptor repressor                         | K.APSGAMLPPR.L                     | 2 | 2.25 | 0.11 |       |
| IPI00718821 | Isoform 1 of Uncharacterized protein C19orf55              | K.AKALPPAAGSVIR.K                  | 2 | 2.06 | 0.23 |       |
| IPI00718977 | glutamate receptor, ionotropic, AMPA 4 isoform 2 precursor | G.AFPSSVQIGGLFIR.N                 | 2 | 4.61 | 0.40 | -5.45 |
| IPI00718977 | glutamate receptor, ionotropic, AMPA 4 isoform 2 precursor | K.GYHYIIANLGFK.D                   | 2 | 2.93 | 0.28 | -0.42 |
| IPI00718977 | glutamate receptor, ionotropic, AMPA 4 isoform 2 precursor | K.GYHYIIANLGFK.D                   | 3 | 3.51 | 0.22 | -0.70 |
| IPI00718977 | glutamate receptor, ionotropic, AMPA 4 isoform 2 precursor | K.YTSALTYDGVLM*AETFR.S             | 2 | 5.21 | 0.56 | -2.12 |
| IPI00718977 | glutamate receptor, ionotropic, AMPA 4 isoform 2 precursor | R.EYPGSETPPK.Y                     | 1 | 1.61 | 0.13 | -1.63 |
| IPI00718977 | glutamate receptor, ionotropic, AMPA 4 isoform 2 precursor | R.EYPGSETPPK.Y                     | 2 | 1.91 | 0.13 | -0.09 |

|             |                                                            |                                   |   |      |      |       |
|-------------|------------------------------------------------------------|-----------------------------------|---|------|------|-------|
| IPI00718977 | glutamate receptor, ionotropic, AMPA 4 isoform 2 precursor | R.GVFAIFGLYDK.R                   | 2 | 4.05 | 0.40 | -3.25 |
| IPI00718977 | glutamate receptor, ionotropic, AMPA 4 isoform 2 precursor | R.GVFAIFGLYDKR.S                  | 2 | 3.60 | 0.37 | -3.51 |
| IPI00718977 | glutamate receptor, ionotropic, AMPA 4 isoform 2 precursor | R.GVFAIFGLYDKR.S                  | 3 | 2.72 | 0.31 | -3.38 |
| IPI00718977 | glutamate receptor, ionotropic, AMPA 4 isoform 2 precursor | R.IQGLTGNVQFDHYGR.R               | 2 | 4.56 | 0.58 | -2.92 |
| IPI00718977 | glutamate receptor, ionotropic, AMPA 4 isoform 2 precursor | R.IQGLTGNVQFDHYGR.R               | 3 | 2.02 | 0.14 | -2.18 |
| IPI00718977 | glutamate receptor, ionotropic, AMPA 4 isoform 2 precursor | R.IQGLTGNVQFDHYGRR.V              | 2 | 2.93 | 0.31 | -4.51 |
| IPI00718977 | glutamate receptor, ionotropic, AMPA 4 isoform 2 precursor | R.IQGLTGNVQFDHYGRR.V              | 3 | 1.98 | 0.13 | -2.53 |
| IPI00718977 | glutamate receptor, ionotropic, AMPA 4 isoform 2 precursor | R.IQGLTGNVQFDHYGRR.V              | 4 | 3.45 | 0.26 | -2.65 |
| IPI00718977 | glutamate receptor, ionotropic, AMPA 4 isoform 2 precursor | R.LQNILEQIVSVGK.H                 | 1 | 2.06 | 0.19 | -3.60 |
| IPI00718977 | glutamate receptor, ionotropic, AMPA 4 isoform 2 precursor | R.LQNILEQIVSVGK.H                 | 2 | 4.99 | 0.43 | -3.36 |
| IPI00718977 | glutamate receptor, ionotropic, AMPA 4 isoform 2 precursor | R.LQNILEQIVSVGK.H                 | 3 | 4.15 | 0.29 | -2.78 |
| IPI00718977 | glutamate receptor, ionotropic, AMPA 4 isoform 2 precursor | R.NTDQEYTAFR.L                    | 1 | 1.75 | 0.06 | -3.37 |
| IPI00718977 | glutamate receptor, ionotropic, AMPA 4 isoform 2 precursor | R.NTDQEYTAFR.L                    | 2 | 3.57 | 0.15 | -2.57 |
| IPI00718977 | glutamate receptor, ionotropic, AMPA 4 isoform 2 precursor | R.RGNAGDCLANPAAPWGQGIDM*ER.T      | 3 | 2.90 | 0.11 |       |
| IPI00719505 | RABL2A protein                                             | K.YDADDNVKIIICPGDSAVGKSK.L        | 2 | 2.04 | 0.06 | -3.58 |
| IPI00719621 | Isoform 1 of Plexin-A2 precursor                           | K.FIYYPNPTFELLSPTGVLDQKPGSPIILK.G | 3 | 2.57 | 0.28 | -3.89 |
| IPI00719621 | Isoform 1 of Plexin-A2 precursor                           | K.IFVSTFEK.F                      | 2 | 2.22 | 0.09 | -3.62 |
| IPI00719621 | Isoform 1 of Plexin-A2 precursor                           | K.LLRLLDDLFIIVPEPSHKK.E           | 4 | 3.39 | 0.22 | -3.08 |
| IPI00719621 | Isoform 1 of Plexin-A2 precursor                           | K.NLPQPQSGQR.G                    | 2 | 1.99 | 0.13 | -0.72 |
| IPI00719621 | Isoform 1 of Plexin-A2 precursor                           | K.TGTM*YGVIVR.S                   | 2 | 2.11 | 0.13 | -2.48 |
| IPI00719621 | Isoform 1 of Plexin-A2 precursor                           | R.DM*AFSIDQR.Y                    | 2 | 3.27 | 0.25 | 0.25  |
| IPI00735451 | Uncharacterized protein ENSP00000375035                    | A.EVQLVQSGAEVKKPGESLK.I           | 2 | 5.01 | 0.38 |       |
| IPI00735451 | Uncharacterized protein ENSP00000375035                    | R.YSPFQGGQVTISADK.S               | 2 | 3.83 | 0.46 |       |
| IPI00735934 | similar to capicua homolog                                 | R.GQAHKPGASSVTRAR.G               | 2 | 1.91 | 0.21 |       |
| IPI00736860 | ELK2, member of ETS oncogene family, pseudogene 1          | K.FNWYVDGVEVHNAK.T                | 1 | 3.93 | 0.41 |       |
| IPI00736860 | ELK2, member of ETS oncogene family, pseudogene 1          | K.FNWYVDGVEVHNAK.T                | 2 | 5.51 | 0.51 |       |

|             |                                                                            |                                             |   |      |      |       |
|-------------|----------------------------------------------------------------------------|---------------------------------------------|---|------|------|-------|
| IPI00736860 | ELK2, member of ETS oncogene family, pseudogene 1                          | K.FNWWYVDGVEVHNAK.T                         | 3 | 3.99 | 0.38 |       |
| IPI00736860 | ELK2, member of ETS oncogene family, pseudogene 1                          | K.GFYPSDIAVEWESNGQPENNYK.T                  | 2 | 4.88 | 0.31 |       |
| IPI00736860 | ELK2, member of ETS oncogene family, pseudogene 1                          | K.GFYPSDIAVEWESNGQPENNYK.T                  | 3 | 4.56 | 0.26 |       |
| IPI00736860 | ELK2, member of ETS oncogene family, pseudogene 1                          | K.GFYPSDIAVEWESNGQPENNYKTTTPMLDSNGSFFLYSK.L | 3 | 3.38 | 0.17 |       |
| IPI00736860 | ELK2, member of ETS oncogene family, pseudogene 1                          | K.WYVDGVEVHNAK.T                            | 1 | 2.91 | 0.35 |       |
| IPI00736860 | ELK2, member of ETS oncogene family, pseudogene 1                          | K.WYVDGVEVHNAK.T                            | 2 | 3.90 | 0.46 |       |
| IPI00736860 | ELK2, member of ETS oncogene family, pseudogene 1                          | K.WYVDGVEVHNAK.T                            | 3 | 2.99 | 0.21 |       |
| IPI00736860 | ELK2, member of ETS oncogene family, pseudogene 1                          | R.TPEVTCVVVDVSHED.P                         | 2 | 5.50 | 0.52 |       |
| IPI00736885 | Ig kappa chain V-II region TEW                                             | -.DIVM*TSPLSLPVTGPGEPAISCR.S                | 2 | 5.32 | 0.47 |       |
| IPI00736885 | Ig kappa chain V-II region TEW                                             | -.DIVM*TSPLSLPVTGPGEPAISCR.S                | 3 | 5.28 | 0.41 |       |
| IPI00736885 | Ig kappa chain V-II region TEW                                             | -.DIVMTQSPLSLPVTGPGEPAISCR.S                | 2 | 4.80 | 0.34 |       |
| IPI00736885 | Ig kappa chain V-II region TEW                                             | -.DIVMTQSPLSLPVTGPGEPAISCR.S                | 3 | 4.58 | 0.31 |       |
| IPI00736885 | Ig kappa chain V-II region TEW                                             | R.ASGVPDRFSGSGSGTDFTLK.I                    | 2 | 4.21 | 0.34 |       |
| IPI00736885 | Ig kappa chain V-II region TEW                                             | R.ASGVPDRFSGSGSGTDFTLK.I                    | 3 | 4.21 | 0.29 |       |
| IPI00736885 | Ig kappa chain V-II region TEW                                             | R.ASGVPDRFSGSGSGTDFTLKISR.V                 | 3 | 3.90 | 0.22 |       |
| IPI00736885 | Ig kappa chain V-II region TEW                                             | R.FSGSGSGTDFTLK.I                           | 1 | 2.83 | 0.22 |       |
| IPI00736885 | Ig kappa chain V-II region TEW                                             | R.FSGSGSGTDFTLK.I                           | 2 | 3.86 | 0.19 |       |
| IPI00737429 | Teneurin-4                                                                 | R.DYDVLAGR.W                                | 2 | 2.77 | 0.19 | -3.00 |
| IPI00737920 | similar to dynein, axonemal, heavy polypeptide 1                           | K.KYAEAGHSM*DEM*K.E                         | 2 | 1.61 | 0.28 | -4.48 |
| IPI00737969 | microtubule associated monooxygenase, calponin and LIM domain containing 3 | K.ERRPDSPTRPTLRGSEEPTLK.H                   | 2 | 1.97 | 0.22 |       |
| IPI00738499 | Ferritin light chain                                                       | R.LGGPEAGLGEYLFER.L                         | 2 | 2.53 | 0.23 |       |
| IPI00738920 | similar to CG3104-PA, isoform A                                            | R.RRGAGEVPADLGPLRVPGSR.A                    | 2 | 2.26 | 0.17 |       |
| IPI00739099 | Collagen alpha-2(V) chain precursor                                        | K.NSVGYM*DDQAK.N                            | 2 | 2.59 | 0.31 | -3.36 |
| IPI00739099 | Collagen alpha-2(V) chain precursor                                        | K.SLSSQIETM*R.S                             | 2 | 2.55 | 0.18 | -1.66 |
| IPI00739099 | Collagen alpha-2(V) chain precursor                                        | R.GSQFAYGDHQSPNTAITQM*TFLLR.L               | 3 | 5.49 | 0.47 | -1.62 |
| IPI00739106 | similar to ribosomal protein L5 isoform 1                                  | K.HIM*GQNVADYMCYLM*EEDENAYK.K               | 3 | 2.52 | 0.17 | -7.97 |
| IPI00739237 | similar to Complement C3 precursor                                         | K.ACEPGVDYVYK.T                             | 2 | 2.96 | 0.10 |       |
| IPI00739237 | similar to Complement C3 precursor                                         | K.ACEPGVDYVYKTR.L                           | 2 | 3.51 | 0.30 |       |
| IPI00739237 | similar to Complement C3 precursor                                         | K.AFSDRNTLIYLDKVSHEDDCLAFK.V                | 3 | 5.48 | 0.36 |       |
| IPI00739237 | similar to Complement C3 precursor                                         | K.AKDQLTCNK.F                               | 2 | 1.85 | 0.23 |       |
| IPI00739237 | similar to Complement C3 precursor                                         | K.AKDQLTCNKFDLK.V                           | 2 | 4.17 | 0.32 |       |
| IPI00739237 | similar to Complement C3 precursor                                         | K.DAPDHQELNLDVSLQLPSR.S                     | 2 | 6.10 | 0.36 |       |
| IPI00739237 | similar to Complement C3 precursor                                         | K.DAPDHQELNLDVSLQLPSR.S                     | 3 | 3.64 | 0.17 |       |

|             |                                    |                                      |   |      |      |       |
|-------------|------------------------------------|--------------------------------------|---|------|------|-------|
| IPI00739237 | similar to Complement C3 precursor | K.DQLTCNKFDLK.V                      | 2 | 3.41 | 0.20 |       |
| IPI00739237 | similar to Complement C3 precursor | K.DTWVEHWPEEDECQDEENQK.Q             | 3 | 5.83 | 0.23 |       |
| IPI00739237 | similar to Complement C3 precursor | K.ENEFGTVTAEGK.G                     | 2 | 3.37 | 0.30 |       |
| IPI00739237 | similar to Complement C3 precursor | K.GQGTLSSVVTM*YHAK.A                 | 2 | 3.76 | 0.39 |       |
| IPI00739237 | similar to Complement C3 precursor | K.LCRDELCR.C                         | 2 | 3.01 | 0.11 |       |
| IPI00739237 | similar to Complement C3 precursor | K.NTM*ILEICTR.Y                      | 2 | 4.00 | 0.24 |       |
| IPI00739237 | similar to Complement C3 precursor | K.NTMILEICTR.Y                       | 2 | 3.51 | 0.29 |       |
| IPI00739237 | similar to Complement C3 precursor | K.SDDKVTLEER.L                       | 1 | 2.73 | 0.15 |       |
| IPI00739237 | similar to Complement C3 precursor | K.SDDKVTLEER.L                       | 2 | 2.91 | 0.17 |       |
| IPI00739237 | similar to Complement C3 precursor | K.SDDKVTLEERLDK.A                    | 2 | 3.17 | 0.16 |       |
| IPI00739237 | similar to Complement C3 precursor | K.SDDKVTLEERLDK.A                    | 3 | 3.31 | 0.20 |       |
| IPI00739237 | similar to Complement C3 precursor | K.SDDKVTLEERLDKACEPGVDYVYK.T         | 2 | 3.62 | 0.39 |       |
| IPI00739237 | similar to Complement C3 precursor | K.SDDKVTLEERLDKACEPGVDYVYK.T         | 3 | 4.92 | 0.29 |       |
| IPI00739237 | similar to Complement C3 precursor | K.SGSDEVQVGQQR.T                     | 2 | 3.81 | 0.30 | -2.95 |
| IPI00739237 | similar to Complement C3 precursor | K.SGSDEVQVGQQR.T                     | 3 | 3.24 | 0.14 |       |
| IPI00739237 | similar to Complement C3 precursor | K.VHQYFNVELIQPGAVK.V                 | 2 | 3.98 | 0.36 | -5.51 |
| IPI00739237 | similar to Complement C3 precursor | K.VQLSNDFDEYIM*AIEQTIK.S             | 2 | 5.58 | 0.53 | -4.53 |
| IPI00739237 | similar to Complement C3 precursor | K.VQLSNDFDEYIM*AIEQTIK.S             | 3 | 4.59 | 0.35 | -5.18 |
| IPI00739237 | similar to Complement C3 precursor | K.VQLSNDFDEYIM*AIEQTIKSGSDEVQVGQQR.T | 3 | 6.43 | 0.52 |       |
| IPI00739237 | similar to Complement C3 precursor | K.VQLSNDFDEYIMAIEQTIK.S              | 2 | 6.23 | 0.43 |       |
| IPI00739237 | similar to Complement C3 precursor | K.VQLSNDFDEYIMAIEQTIK.S              | 3 | 4.71 | 0.29 |       |
| IPI00739237 | similar to Complement C3 precursor | K.VSHSEDDCLAFK.V                     | 1 | 3.60 | 0.35 |       |
| IPI00739237 | similar to Complement C3 precursor | K.VSHSEDDCLAFK.V                     | 2 | 3.64 | 0.33 |       |
| IPI00739237 | similar to Complement C3 precursor | K.VSHSEDDCLAFK.V                     | 3 | 5.05 | 0.28 |       |
| IPI00739237 | similar to Complement C3 precursor | K.VTIKPAPETEK.R                      | 2 | 2.63 | 0.13 |       |
| IPI00739237 | similar to Complement C3 precursor | K.VTIKPAPETEK.R                      | 3 | 3.01 | 0.19 |       |
| IPI00739237 | similar to Complement C3 precursor | K.VTIKPAPETEKRPQDAK.N                | 2 | 4.08 | 0.36 |       |
| IPI00739237 | similar to Complement C3 precursor | K.VTIKPAPETEKRPQDAK.N                | 3 | 3.39 | 0.18 |       |
| IPI00739237 | similar to Complement C3 precursor | K.VTIKPAPETEKRPQDAKNTM*ILEICTR.Y     | 3 | 3.80 | 0.15 |       |
| IPI00739237 | similar to Complement C3 precursor | K.VYAYYNLEESCTR.F                    | 1 | 2.71 | 0.33 |       |
| IPI00739237 | similar to Complement C3 precursor | K.VYAYYNLEESCTR.F                    | 2 | 5.09 | 0.45 |       |
| IPI00739237 | similar to Complement C3 precursor | K.VYAYYNLEESCTR.F                    | 3 | 4.93 | 0.26 |       |
| IPI00739237 | similar to Complement C3 precursor | K.YELDKAFSDR.N                       | 1 | 2.41 | 0.28 |       |
| IPI00739237 | similar to Complement C3 precursor | K.YELDKAFSDR.N                       | 2 | 3.01 | 0.33 |       |
| IPI00739237 | similar to Complement C3 precursor | K.YELDKAFSDR.N                       | 3 | 2.42 | 0.22 |       |
| IPI00739237 | similar to Complement C3 precursor | K.YELDKAFSDRNTLIYLDK.V               | 3 | 4.68 | 0.26 |       |
| IPI00739237 | similar to Complement C3 precursor | R.CAEENCFIQK.S                       | 1 | 3.26 | 0.29 |       |
| IPI00739237 | similar to Complement C3 precursor | R.CAEENCFIQK.S                       | 2 | 3.81 | 0.29 |       |
| IPI00739237 | similar to Complement C3 precursor | R.EALKLEEK.K                         | 1 | 2.61 | 0.06 |       |
| IPI00739237 | similar to Complement C3 precursor | R.FYHPEKEDGK.L                       | 2 | 2.79 | 0.15 |       |
| IPI00739237 | similar to Complement C3 precursor | R.FYHPEKEDGKLNK.L                    | 2 | 3.08 | 0.09 |       |
| IPI00739237 | similar to Complement C3 precursor | R.FYHPEKEDGKLNK.L                    | 3 | 3.53 | 0.21 |       |



|             |                                                                                |                                            |   |      |      |       |
|-------------|--------------------------------------------------------------------------------|--------------------------------------------|---|------|------|-------|
| IPI00739237 | similar to Complement C3 precursor                                             | R.GDQDATM*SILDISM*M*TFAPDTDDLK.Q           | 3 | 3.42 | 0.26 |       |
| IPI00739237 | similar to Complement C3 precursor                                             | R.LDKACEPGVDYVYK.T                         | 1 | 3.47 | 0.32 |       |
| IPI00739237 | similar to Complement C3 precursor                                             | R.LDKACEPGVDYVYK.T                         | 2 | 4.28 | 0.39 |       |
| IPI00739237 | similar to Complement C3 precursor                                             | R.NTLIYLDK.V                               | 1 | 2.50 | 0.06 |       |
| IPI00739237 | similar to Complement C3 precursor                                             | R.NTLIYLDK.V                               | 2 | 3.14 | 0.13 |       |
| IPI00739237 | similar to Complement C3 precursor                                             | R.NTLIYLDKVSHSEDDCLAFK.V                   | 2 | 5.47 | 0.40 |       |
| IPI00739237 | similar to Complement C3 precursor                                             | R.NTLIYLDKVSHSEDDCLAFK.V                   | 3 | 5.15 | 0.30 |       |
| IPI00739237 | similar to Complement C3 precursor                                             | R.SEETKENEGFTVTAEGK.G                      | 1 | 4.42 | 0.41 |       |
| IPI00739237 | similar to Complement C3 precursor                                             | R.SEETKENEGFTVTAEGK.G                      | 2 | 5.08 | 0.38 |       |
| IPI00739237 | similar to Complement C3 precursor                                             | R.SEETKENEGFTVTAEGK.G                      | 3 | 4.57 | 0.34 |       |
| IPI00739237 | similar to Complement C3 precursor                                             | R.YISKYELDK.A                              | 2 | 2.20 | 0.19 |       |
| IPI00739237 | similar to Complement C3 precursor                                             | R.YISKYELDKAFSDR.N                         | 2 | 4.62 | 0.42 |       |
| IPI00739237 | similar to Complement C3 precursor                                             | R.YRGDQDATM*SILDISM*M*TFAPDTDDLK.Q         | 3 | 6.69 | 0.44 |       |
| IPI00739237 | similar to Complement C3 precursor                                             | R.YRGDQDATM*SILDISM*M*TFAPDTDDLKQLANGVDR.Y | 3 | 5.68 | 0.48 |       |
| IPI00739237 | similar to Complement C3 precursor                                             | R.YRGDQDATM*SILDISM*M*TFAPDTDDLK.Q         | 3 | 4.27 | 0.10 |       |
| IPI00739827 | Isoform LAMP-2B of Lysosome-associated membrane glycoprotein 2 precursor       | K.EQTVSVSGAFQINTFDLR.V                     | 2 | 2.42 | 0.11 | -3.14 |
| IPI00739827 | Isoform LAMP-2B of Lysosome-associated membrane glycoprotein 2 precursor       | K.GILTVDELLAIR.I                           | 2 | 3.28 | 0.24 | -4.69 |
| IPI00739827 | Isoform LAMP-2B of Lysosome-associated membrane glycoprotein 2 precursor       | K.GILTVDELLAIR.I                           | 3 | 4.00 | 0.18 | -3.13 |
| IPI00739827 | Isoform LAMP-2B of Lysosome-associated membrane glycoprotein 2 precursor       | K.YLDFVFAVK.N                              | 1 | 1.97 | 0.27 | -4.19 |
| IPI00739827 | Isoform LAMP-2B of Lysosome-associated membrane glycoprotein 2 precursor       | K.YLDFVFAVK.N                              | 2 | 3.47 | 0.36 | -3.76 |
| IPI00739827 | Isoform LAMP-2B of Lysosome-associated membrane glycoprotein 2 precursor       | R.IPLNDLFR.C                               | 2 | 3.02 | 0.18 | -2.46 |
| IPI00739827 | Isoform LAMP-2B of Lysosome-associated membrane glycoprotein 2 precursor       | R.SHTALLR.L                                | 1 | 1.99 | 0.18 | -4.42 |
| IPI00739827 | Isoform LAMP-2B of Lysosome-associated membrane glycoprotein 2 precursor       | R.YETTNKTYK.T                              | 2 | 2.92 | 0.23 | -3.95 |
| IPI00740191 | similar to Forkhead box protein L1                                             | R.KFPYYR.A                                 | 2 | 1.14 | 0.06 | -0.95 |
| IPI00740545 | similar to Prostate, ovary, testis expressed protein on chromosome 2 isoform 2 | K.AGFAGDDAPR.A                             | 1 | 2.25 | 0.23 | -4.33 |
| IPI00740545 | similar to Prostate, ovary, testis expressed protein on chromosome 2 isoform 2 | K.AGFAGDDAPR.A                             | 2 | 3.47 | 0.32 | -3.15 |
| IPI00740545 | similar to Prostate, ovary, testis expressed protein on chromosome 2 isoform 2 | K.IWHHTFYNELR.V                            | 2 | 2.86 | 0.27 | -2.07 |
| IPI00740545 | similar to Prostate, ovary, testis expressed protein on chromosome 2 isoform 2 | K.QEYDESGPSIVHR.K                          | 2 | 2.62 | 0.19 | -2.24 |
| IPI00740545 | similar to Prostate, ovary, testis expressed protein on chromosome 2 isoform 2 | K.QEYDESGPSIVHR.K                          | 3 | 2.82 | 0.22 |       |

|             |                                                                                |                                     |   |      |      |       |
|-------------|--------------------------------------------------------------------------------|-------------------------------------|---|------|------|-------|
| IPI00740545 | similar to Prostate, ovary, testis expressed protein on chromosome 2 isoform 2 | K.QEYDESGPSIVHRK.C                  | 2 | 1.14 | 0.07 | -2.73 |
| IPI00740545 | similar to Prostate, ovary, testis expressed protein on chromosome 2 isoform 2 | R.AVFPSIVGRPR.H                     | 2 | 3.03 | 0.29 | -3.27 |
| IPI00741005 | similar to MAX-interacting protein isoform 4                                   | K.RKKKM*GSDEFDISPR.I                | 2 | 2.16 | 0.07 | 3.01  |
| IPI00741608 | similar to eukaryotic translation initiation factor 5A                         | K.VHLVGIDIFTGK.K                    | 3 | 4.27 | 0.36 | -2.32 |
| IPI00741608 | similar to eukaryotic translation initiation factor 5A                         | K.YDCGEEILITVLSAMTEEAVAIK.A         | 2 | 4.14 | 0.49 | -1.90 |
| IPI00741608 | similar to eukaryotic translation initiation factor 5A                         | K.YDCGEEILITVLSAMTEEAVAIK.A         | 3 | 3.76 | 0.35 | -3.64 |
| IPI00741710 | Isoform 2 of Sushi, nidogen and EGF-like domain-containing protein 1 precursor | K.EVSQFTPVAFPIAK.D                  | 2 | 4.46 | 0.40 | -3.21 |
| IPI00741710 | Isoform 2 of Sushi, nidogen and EGF-like domain-containing protein 1 precursor | R.GYLSAPS.R.I                       | 2 | 2.54 | 0.21 | -1.05 |
| IPI00741710 | Isoform 2 of Sushi, nidogen and EGF-like domain-containing protein 1 precursor | R.SSHQLQALAAGR.A                    | 2 | 3.21 | 0.37 | -3.30 |
| IPI00741710 | Isoform 2 of Sushi, nidogen and EGF-like domain-containing protein 1 precursor | R.VSLALQLPEHGSK.D                   | 3 | 2.36 | 0.09 | -2.85 |
| IPI00741780 | similar to CG4845-PA                                                           | K.SKLGVDHTLDLVVSVFIQEQIVTEEAK.S     | 3 | 3.20 | 0.14 |       |
| IPI00742696 | vitamin D-binding protein precursor                                            | A.QKVPTADLEDVLPLAEDITNILSK.C        | 3 | 5.64 | 0.48 | -4.24 |
| IPI00742696 | vitamin D-binding protein precursor                                            | C.SQYAAYPEK.K                       | 1 | 2.17 | 0.34 | -2.32 |
| IPI00742696 | vitamin D-binding protein precursor                                            | F.PSGTFEQVSQLVK.E                   | 2 | 4.32 | 0.36 | -5.82 |
| IPI00742696 | vitamin D-binding protein precursor                                            | H.LSLLTTLNLR.V                      | 2 | 3.58 | 0.27 | -2.70 |
| IPI00742696 | vitamin D-binding protein precursor                                            | K.AKLDPATPTELAK.L                   | 1 | 2.87 | 0.31 | -2.91 |
| IPI00742696 | vitamin D-binding protein precursor                                            | K.AKLDPATPTELAK.L                   | 2 | 3.05 | 0.29 | -4.06 |
| IPI00742696 | vitamin D-binding protein precursor                                            | K.AKLDPATPTELAK.L                   | 3 | 2.17 | 0.11 | -2.72 |
| IPI00742696 | vitamin D-binding protein precursor                                            | K.CCESASEDCM*AK.E                   | 2 | 4.18 | 0.58 | -4.71 |
| IPI00742696 | vitamin D-binding protein precursor                                            | K.DPKEYANQFM*WEYSTNYGQAPLSLLVSYTK.S | 3 | 7.16 | 0.60 | -4.21 |
| IPI00742696 | vitamin D-binding protein precursor                                            | K.DPKEYANQFM*WEYSTNYGQAPLSLLVSYTK.S | 4 | 4.86 | 0.46 | -4.33 |
| IPI00742696 | vitamin D-binding protein precursor                                            | K.EDFTSLSLVLYSR.K                   | 2 | 4.06 | 0.40 | -4.59 |
| IPI00742696 | vitamin D-binding protein precursor                                            | K.EDFTSLSLVLYSR.K                   | 3 | 2.48 | 0.19 | -2.04 |
| IPI00742696 | vitamin D-binding protein precursor                                            | K.EFSLGK.E                          | 1 | 2.08 | 0.17 | -3.87 |
| IPI00742696 | vitamin D-binding protein precursor                                            | K.EFSLGKEDFTSLSLVLYSR.K             | 2 | 5.79 | 0.57 | -5.31 |
| IPI00742696 | vitamin D-binding protein precursor                                            | K.EFSLGKEDFTSLSLVLYSR.K             | 3 | 4.76 | 0.49 | -8.62 |
| IPI00742696 | vitamin D-binding protein precursor                                            | K.EFSLGKEDFTSLSLVLYSR.K             | 4 | 3.54 | 0.30 | -4.49 |
| IPI00742696 | vitamin D-binding protein precursor                                            | K.ELPEHTVK.L                        | 1 | 2.09 | 0.16 | -4.95 |
| IPI00742696 | vitamin D-binding protein precursor                                            | K.ELSSFIDK.G                        | 1 | 2.47 | 0.19 | -3.53 |
| IPI00742696 | vitamin D-binding protein precursor                                            | K.ELSSFIDK.G                        | 2 | 2.11 | 0.18 | -3.11 |
| IPI00742696 | vitamin D-binding protein precursor                                            | K.ELSSFIDKQELCADYSENTFTEYK.K        | 2 | 4.39 | 0.59 | -3.45 |
| IPI00742696 | vitamin D-binding protein precursor                                            | K.ELSSFIDKQELCADYSENTFTEYK.K        | 3 | 6.62 | 0.60 | -5.39 |
| IPI00742696 | vitamin D-binding protein precursor                                            | K.ELSSFIDKQELCADYSENTFTEYK.K        | 3 | 5.36 | 0.46 | -4.13 |
| IPI00742696 | vitamin D-binding protein precursor                                            | K.ELSSFIDKQELCADYSENTFTEYK.K        | 4 | 3.71 | 0.29 | -3.65 |
| IPI00742696 | vitamin D-binding protein precursor                                            | K.ELSSFIDKQELCADYSENTFTEYK.K.L      | 4 | 3.69 | 0.24 | -5.34 |
| IPI00742696 | vitamin D-binding protein precursor                                            | K.EVSLTEACCAEGADPCYDTR.T            | 2 | 5.93 | 0.54 | -4.51 |

|             |                                     |                                              |   |      |      |       |
|-------------|-------------------------------------|----------------------------------------------|---|------|------|-------|
| IPI00742696 | vitamin D-binding protein precursor | K.EVVS LTEACCAEGADPCYDTR.T                   | 3 | 5.87 | 0.48 | -4.77 |
| IPI00742696 | vitamin D-binding protein precursor | K.EYANQFM*WEYSTNYGQAPLSLLVSYTK.S             | 2 | 4.90 | 0.61 | -4.32 |
| IPI00742696 | vitamin D-binding protein precursor | K.EYANQFM*WEYSTNYGQAPLSLLVSYTK.S             | 3 | 7.23 | 0.62 | -8.54 |
| IPI00742696 | vitamin D-binding protein precursor | K.FEDCCQEK.T                                 | 2 | 2.66 | 0.19 | -2.40 |
| IPI00742696 | vitamin D-binding protein precursor | K.FPSGTFEQVSQLVK.E                           | 2 | 5.03 | 0.45 | -3.83 |
| IPI00742696 | vitamin D-binding protein precursor | K.GQELCADYSENTFTEYK.K                        | 2 | 5.92 | 0.62 | -2.07 |
| IPI00742696 | vitamin D-binding protein precursor | K.HLSLLTTLNLR.V                              | 1 | 3.30 | 0.31 | -4.14 |
| IPI00742696 | vitamin D-binding protein precursor | K.HLSLLTTLNLR.V                              | 2 | 3.67 | 0.45 | -4.95 |
| IPI00742696 | vitamin D-binding protein precursor | K.HLSLLTTLNLR.V                              | 3 | 2.69 | 0.23 | -4.18 |
| IPI00742696 | vitamin D-binding protein precursor | K.HQPQEFPTYVEPTNDEICEAFR.K                   | 2 | 4.33 | 0.54 | -2.38 |
| IPI00742696 | vitamin D-binding protein precursor | K.HQPQEFPTYVEPTNDEICEAFR.K                   | 3 | 5.98 | 0.55 | -2.96 |
| IPI00742696 | vitamin D-binding protein precursor | K.HQPQEFPTYVEPTNDEICEAFR.K.D                 | 3 | 3.97 | 0.44 | -4.45 |
| IPI00742696 | vitamin D-binding protein precursor | K.HQPQEFPTYVEPTNDEICEAFR.KDPK.E              | 4 | 2.84 | 0.13 | -4.40 |
| IPI00742696 | vitamin D-binding protein precursor | K.LAQKVPTADLEDVLAEDITNLI.L                   | 2 | 4.96 | 0.41 | -5.15 |
| IPI00742696 | vitamin D-binding protein precursor | K.LAQKVPTADLEDVLAEDITNLI.S                   | 2 | 3.34 | 0.38 | -3.93 |
| IPI00742696 | vitamin D-binding protein precursor | K.LAQKVPTADLEDVLAEDITNLI.SK.C                | 2 | 5.63 | 0.60 | -5.25 |
| IPI00742696 | vitamin D-binding protein precursor | K.LAQKVPTADLEDVLAEDITNLI.SK.C                | 3 | 6.68 | 0.53 | -9.10 |
| IPI00742696 | vitamin D-binding protein precursor | K.LAQKVPTADLEDVLAEDITNLI.SK.C                | 4 | 6.46 | 0.49 | -6.06 |
| IPI00742696 | vitamin D-binding protein precursor | K.LCDNLSTK.N                                 | 1 | 2.25 | 0.22 | -3.43 |
| IPI00742696 | vitamin D-binding protein precursor | K.LCDNLSTK.N                                 | 2 | 2.78 | 0.30 | -3.11 |
| IPI00742696 | vitamin D-binding protein precursor | K.LCM*AALK.H                                 | 2 | 1.63 | 0.05 | -2.92 |
| IPI00742696 | vitamin D-binding protein precursor | K.LPDATPTELAK.L                              | 1 | 2.34 | 0.36 | -2.90 |
| IPI00742696 | vitamin D-binding protein precursor | K.LPDATPTELAK.L                              | 2 | 3.16 | 0.38 | -3.51 |
| IPI00742696 | vitamin D-binding protein precursor | K.NSKFEDCCQEK.T                              | 2 | 3.07 | 0.26 | -4.03 |
| IPI00742696 | vitamin D-binding protein precursor | K.NSKFEDCCQEK.T                              | 3 | 2.46 | 0.12 | -1.98 |
| IPI00742696 | vitamin D-binding protein precursor | K.SCESNSPPFVHPGTAECCTK.E                     | 2 | 4.75 | 0.56 | -2.69 |
| IPI00742696 | vitamin D-binding protein precursor | K.SCESNSPPFVHPGTAECCTK.E                     | 3 | 2.86 | 0.40 | -3.01 |
| IPI00742696 | vitamin D-binding protein precursor | K.SLGECCDVEDSTTCFNAK.G                       | 2 | 5.76 | 0.55 | -4.13 |
| IPI00742696 | vitamin D-binding protein precursor | K.SLGECCDVEDSTTCFNAK.G                       | 3 | 3.31 | 0.51 | -4.40 |
| IPI00742696 | vitamin D-binding protein precursor | K.SYLSM*VGSCCTSASPTVCFLK.E                   | 2 | 5.85 | 0.68 | -4.51 |
| IPI00742696 | vitamin D-binding protein precursor | K.SYLSM*VGSCCTSASPTVCFLK.E                   | 3 | 6.62 | 0.56 | -4.80 |
| IPI00742696 | vitamin D-binding protein precursor | K.SYLSM*VGSCCTSASPTVCFLKER.L                 | 3 | 5.00 | 0.50 | -2.26 |
| IPI00742696 | vitamin D-binding protein precursor | K.SYLSMVGSCCTSASPTVCFLK.E                    | 2 | 5.03 | 0.53 | -4.72 |
| IPI00742696 | vitamin D-binding protein precursor | K.SYLSMVGSCCTSASPTVCFLK.E                    | 3 | 3.17 | 0.26 | -5.36 |
| IPI00742696 | vitamin D-binding protein precursor | K.TAM*DVFVCTYFM*PAAQLPELDPVELPTNK.D          | 3 | 5.51 | 0.55 | -3.05 |
| IPI00742696 | vitamin D-binding protein precursor | K.TAM*DVFVCTYFM*PAAQLPELDPVELPTNKDVCDPGNTK.V | 3 | 5.62 | 0.65 | -4.01 |
| IPI00742696 | vitamin D-binding protein precursor | K.TAM*DVFVCTYFM*PAAQLPELDPVELPTNKDVCDPGNTK.V | 4 | 4.98 | 0.49 | -5.10 |
| IPI00742696 | vitamin D-binding protein precursor | K.TSALSAK.K                                  | 1 | 1.41 | 0.10 | -0.16 |
| IPI00742696 | vitamin D-binding protein precursor | K.VLEPTLK.S                                  | 1 | 1.75 | 0.09 | -2.81 |
| IPI00742696 | vitamin D-binding protein precursor | K.VLEPTLK.S                                  | 2 | 1.71 | 0.07 | -2.79 |
| IPI00742696 | vitamin D-binding protein precursor | K.VM*DKYTFELSR.R                             | 1 | 1.27 | 0.08 | -0.97 |
| IPI00742696 | vitamin D-binding protein precursor | K.VM*DKYTFELSR.R                             | 2 | 3.81 | 0.37 | -4.74 |

|             |                                              |                                      |   |      |      |       |
|-------------|----------------------------------------------|--------------------------------------|---|------|------|-------|
| IPI00742696 | vitamin D-binding protein precursor          | K.VM*DKYTFELSR.R                     | 3 | 4.15 | 0.30 | -4.12 |
| IPI00742696 | vitamin D-binding protein precursor          | K.VMDKYTFELSR.R                      | 2 | 2.37 | 0.21 |       |
| IPI00742696 | vitamin D-binding protein precursor          | K.VPTADLEDVLPLAEDITNILSK.C           | 2 | 5.95 | 0.48 | -6.65 |
| IPI00742696 | vitamin D-binding protein precursor          | K.VPTADLEDVLPLAEDITNILSK.C           | 3 | 5.83 | 0.48 | -6.45 |
| IPI00742696 | vitamin D-binding protein precursor          | K.YTFELSR.R                          | 1 | 2.28 | 0.21 | -2.00 |
| IPI00742696 | vitamin D-binding protein precursor          | K.YTFELSR.R                          | 2 | 2.40 | 0.12 | -2.19 |
| IPI00742696 | vitamin D-binding protein precursor          | L.AEDITNILSK.C                       | 1 | 2.62 | 0.24 | 1.51  |
| IPI00742696 | vitamin D-binding protein precursor          | L.AQVPTADLEDVLPLAEDITNILSK.C         | 3 | 5.07 | 0.42 | -3.91 |
| IPI00742696 | vitamin D-binding protein precursor          | L.PLAEDITNILSK.C                     | 1 | 3.45 | 0.43 | -3.75 |
| IPI00742696 | vitamin D-binding protein precursor          | L.PLAEDITNILSK.C                     | 2 | 4.88 | 0.55 | -3.84 |
| IPI00742696 | vitamin D-binding protein precursor          | M.PAAQLPELPDVELPTNK.D                | 3 | 3.63 | 0.31 | -1.23 |
| IPI00742696 | vitamin D-binding protein precursor          | P.TADLEDVLPLAEDITNILSK.C             | 2 | 4.85 | 0.43 | -3.37 |
| IPI00742696 | vitamin D-binding protein precursor          | P.TADLEDVLPLAEDITNILSK.C             | 3 | 3.62 | 0.33 | -5.26 |
| IPI00742696 | vitamin D-binding protein precursor          | R.KDPKEYANQFM*WEYSTNYGQAPLSLLVSYTK.S | 3 | 4.97 | 0.48 | -3.18 |
| IPI00742696 | vitamin D-binding protein precursor          | R.KDPKEYANQFM*WEYSTNYGQAPLSLLVSYTK.S | 4 | 3.18 | 0.26 | -4.73 |
| IPI00742696 | vitamin D-binding protein precursor          | R.KFPSGTFEQVSQLVK.E                  | 1 | 2.74 | 0.32 | -4.58 |
| IPI00742696 | vitamin D-binding protein precursor          | R.KFPSGTFEQVSQLVK.E                  | 2 | 5.55 | 0.45 | -6.64 |
| IPI00742696 | vitamin D-binding protein precursor          | R.KFPSGTFEQVSQLVK.E                  | 3 | 3.88 | 0.37 | -6.41 |
| IPI00742696 | vitamin D-binding protein precursor          | R.LKAKLPDATPTELAK.L                  | 2 | 4.04 | 0.36 | -2.68 |
| IPI00742696 | vitamin D-binding protein precursor          | R.RTHLPEVFLSK.V                      | 2 | 2.92 | 0.28 | -4.34 |
| IPI00742696 | vitamin D-binding protein precursor          | R.RTHLPEVFLSK.V                      | 3 | 3.19 | 0.29 | -3.98 |
| IPI00742696 | vitamin D-binding protein precursor          | R.SDFASNCCSINSPPLYCDSEIDAELK.N       | 3 | 6.41 | 0.55 | -4.51 |
| IPI00742696 | vitamin D-binding protein precursor          | R.SDFASNCCSINSPPLYCDSEIDAELKNIL.-    | 2 | 3.53 | 0.46 | -3.31 |
| IPI00742696 | vitamin D-binding protein precursor          | R.SDFASNCCSINSPPLYCDSEIDAELKNIL.-    | 3 | 5.34 | 0.47 | -3.71 |
| IPI00742696 | vitamin D-binding protein precursor          | R.THLPEVFLSK.V                       | 1 | 3.00 | 0.35 | -5.20 |
| IPI00742696 | vitamin D-binding protein precursor          | R.THLPEVFLSK.V                       | 2 | 3.04 | 0.37 | -4.31 |
| IPI00742696 | vitamin D-binding protein precursor          | R.VCSQYAAAYGEK.K                     | 1 | 2.56 | 0.40 | -3.55 |
| IPI00742696 | vitamin D-binding protein precursor          | R.VCSQYAAAYGEK.K                     | 2 | 3.71 | 0.34 | -3.48 |
| IPI00742696 | vitamin D-binding protein precursor          | V.LPLAEDITNILSK.C                    | 2 | 3.70 | 0.51 | -7.71 |
| IPI00742696 | vitamin D-binding protein precursor          | V.PTADLEDVLPLAEDITNILSK.C            | 2 | 4.92 | 0.54 | -2.54 |
| IPI00742696 | vitamin D-binding protein precursor          | V.PTADLEDVLPLAEDITNILSK.C            | 3 | 3.64 | 0.27 | -2.82 |
| IPI00742696 | vitamin D-binding protein precursor          | W.EYSTNYGQAPLSLLVSYTK.S              | 2 | 4.95 | 0.55 | -5.00 |
| IPI00742696 | vitamin D-binding protein precursor          | W.EYSTNYGQAPLSLLVSYTK.S              | 3 | 4.54 | 0.44 | -3.31 |
| IPI00742696 | vitamin D-binding protein precursor          | Y.FM*PAAQLPELPDVELPTNK.D             | 2 | 2.96 | 0.25 | -1.08 |
| IPI00742696 | vitamin D-binding protein precursor          | Y.STNYGQAPLSLLVSYTK.S                | 2 | 4.21 | 0.52 | -4.01 |
| IPI00742725 | Conserved hypothetical protein               | R.LRPAALGARPPGAQALPPLVGAR.R          | 2 | 1.34 | 0.12 | 0.44  |
| IPI00743194 | Kappa light chain variable region (Fragment) | A.DIVM*TQTPLSLSVTPGQPASISCK.S        | 2 | 5.47 | 0.49 |       |
| IPI00743194 | Kappa light chain variable region (Fragment) | K.SSQSLLHSDGK.T                      | 2 | 3.07 | 0.26 |       |
| IPI00743194 | Kappa light chain variable region (Fragment) | R.FSGSGSGTDFTLK.I                    | 1 | 2.83 | 0.22 |       |
| IPI00743194 | Kappa light chain variable region (Fragment) | R.FSGSGSGTDFTLK.I                    | 2 | 3.86 | 0.19 |       |
| IPI00743284 | Methionine synthase                          | K.M*FLPQVIKSARVM*KKAVGHLPFM*EK.E     | 3 | 3.26 | 0.12 |       |
| IPI00743302 | intercellular adhesion molecule 5 precursor  | K.AANDQGEAVKDVTLTVEYAPALDSVGCPEP.I   | 3 | 3.98 | 0.43 | -5.79 |

|             |                                                      |                                           |   |      |      |       |
|-------------|------------------------------------------------------|-------------------------------------------|---|------|------|-------|
| IPI00743302 | intercellular adhesion molecule 5 precursor          | K.NVAVTVEYGPR.F                           | 2 | 3.85 | 0.43 | -4.06 |
| IPI00743302 | intercellular adhesion molecule 5 precursor          | K.TVVVSAESPPEM*DESTCPHQWLEGAESALACAAR.G   | 3 | 5.62 | 0.57 | -1.97 |
| IPI00743302 | intercellular adhesion molecule 5 precursor          | K.TVVVSAESPPEM*DESTCPHQWLEGAESALACAAR.G   | 4 | 3.01 | 0.05 | -3.05 |
| IPI00743302 | intercellular adhesion molecule 5 precursor          | R.EDAGTYHCVATNAHGTDSCR.T                  | 3 | 2.10 | 0.26 | -3.63 |
| IPI00743302 | intercellular adhesion molecule 5 precursor          | R.ITWLEGTEASLSCVAHGVPDPVICVR.S            | 3 | 4.42 | 0.42 | -3.97 |
| IPI00743302 | intercellular adhesion molecule 5 precursor          | R.ITWLEGTEASLSCVAHGVPDPVICVR.S            | 4 | 2.28 | 0.12 | -2.45 |
| IPI00743302 | intercellular adhesion molecule 5 precursor          | R.LLEVGSERPVSCTLDGLFPASEAR.V              | 2 | 3.13 | 0.31 | -2.84 |
| IPI00743302 | intercellular adhesion molecule 5 precursor          | R.LLEVGSERPVSCTLDGLFPASEAR.V              | 3 | 5.44 | 0.35 | -4.47 |
| IPI00743302 | intercellular adhesion molecule 5 precursor          | R.SDGGAVLALGLLGPVTR.A                     | 2 | 3.79 | 0.33 | -3.62 |
| IPI00743302 | intercellular adhesion molecule 5 precursor          | R.SGELGAVIEGLLR.V                         | 2 | 4.75 | 0.30 | -3.76 |
| IPI00743302 | intercellular adhesion molecule 5 precursor          | R.SGELGAVIEGLLR.V                         | 3 | 4.63 | 0.09 | -3.98 |
| IPI00743302 | intercellular adhesion molecule 5 precursor          | R.SWTWPEGPEQTLR.C                         | 2 | 3.33 | 0.36 | -3.86 |
| IPI00743302 | intercellular adhesion molecule 5 precursor          | R.TFSLSPDAPR.L                            | 2 | 3.23 | 0.36 | -1.84 |
| IPI00743302 | intercellular adhesion molecule 5 precursor          | R.TVTVGVEYRPVVAE.L                        | 2 | 3.76 | 0.52 | -3.79 |
| IPI00743302 | intercellular adhesion molecule 5 precursor          | R.VYLALGDQNLSPDVTLEGDAFVATATATASAEQEGAR.Q | 3 | 5.11 | 0.55 | -4.69 |
| IPI00743302 | intercellular adhesion molecule 5 precursor          | R.VYLALGDQNLSPDVTLEGDAFVATATATASAEQEGAR.Q | 4 | 4.53 | 0.28 | -3.23 |
| IPI00743766 | Fetuin-B precursor                                   | A.M*SPPQLALNPSALLSR.G                     | 2 | 4.43 | 0.46 | -4.12 |
| IPI00743766 | Fetuin-B precursor                                   | A.M*SPPQLALNPSALLSR.G                     | 3 | 3.51 | 0.28 | -3.26 |
| IPI00743766 | Fetuin-B precursor                                   | K.AIFYM*NNPSR.V                           | 2 | 3.35 | 0.35 | -2.24 |
| IPI00743766 | Fetuin-B precursor                                   | K.DGYVLR.L                                | 1 | 1.73 | 0.20 | -4.37 |
| IPI00743766 | Fetuin-B precursor                                   | K.LVVLPFPK.E                              | 1 | 2.06 | 0.13 | -2.59 |
| IPI00743766 | Fetuin-B precursor                                   | K.LVVLPFPK.E                              | 2 | 2.70 | 0.14 | -2.62 |
| IPI00743766 | Fetuin-B precursor                                   | K.SQASSCSLQSSDSVPVGLCK.G                  | 2 | 5.38 | 0.58 | -2.78 |
| IPI00743766 | Fetuin-B precursor                                   | K.SQASSCSLQSSDSVPVGLCK.G                  | 3 | 3.09 | 0.35 | -3.20 |
| IPI00743766 | Fetuin-B precursor                                   | M.SPPQLALNPSALLSR.G                       | 2 | 3.64 | 0.34 | -3.54 |
| IPI00743766 | Fetuin-B precursor                                   | R.ASSQWVVGPSYFVEYLIK.E                    | 2 | 4.78 | 0.42 | -4.15 |
| IPI00743766 | Fetuin-B precursor                                   | R.ASSQWVVGPSYFVEYLIK.E                    | 3 | 4.74 | 0.40 | -4.18 |
| IPI00743766 | Fetuin-B precursor                                   | R.IFFESVYGQCK.A                           | 2 | 3.76 | 0.47 | -2.43 |
| IPI00743766 | Fetuin-B precursor                                   | R.LNRVNDAQEYR.R                           | 2 | 2.81 | 0.31 | -1.29 |
| IPI00743766 | Fetuin-B precursor                                   | R.LNRVNDAQEYR.R                           | 3 | 2.51 | 0.13 | -0.97 |
| IPI00743766 | Fetuin-B precursor                                   | R.VNDAQEYR.R                              | 2 | 2.59 | 0.18 | -0.89 |
| IPI00743766 | Fetuin-B precursor                                   | W.VVGPSYFVEYLIK.E                         | 2 | 3.12 | 0.37 | -4.02 |
| IPI00743898 | Uncharacterized protein ENSP00000357890 (Fragment)   | K.SPASDEAGKK.E                            | 2 | 2.23 | 0.05 | 0.08  |
| IPI00743963 | Ig kappa chain V-I region HK101 precursor (Fragment) | K.SLIYAASSLQSGVPSR.F                      | 2 | 2.77 | 0.08 |       |
| IPI00744226 | Conserved hypothetical protein                       | K.EKGGRKKEEGRNR.K                         | 2 | 2.13 | 0.18 |       |
| IPI00744366 | Conserved hypothetical protein                       | R.DWGSRQSVCVYVCYIGGVGSLCVCYIGGVGSLR.V     | 4 | 3.11 | 0.10 | -3.92 |
| IPI00744561 | IGHA1 protein                                        | K.GDTFSCMVGHEALPLAFTQK.T                  | 2 | 4.19 | 0.19 |       |
| IPI00744561 | IGHA1 protein                                        | K.KGDTFSCM*VGHEALPLAFTQK.T                | 2 | 4.91 | 0.41 |       |
| IPI00744561 | IGHA1 protein                                        | K.KGDTFSCM*VGHEALPLAFTQK.T                | 3 | 3.90 | 0.44 | -2.10 |
| IPI00744561 | IGHA1 protein                                        | K.SAVQGPPER.D                             | 2 | 2.30 | 0.12 | 0.79  |

|             |                                                              |                                                  |   |      |      |       |
|-------------|--------------------------------------------------------------|--------------------------------------------------|---|------|------|-------|
| IPI00744561 | IGHA1 protein                                                | K.SAVQGPPELDLCGCYSVSSVLPGCAEPWNHGK.T             | 3 | 5.80 | 0.08 |       |
| IPI00744561 | IGHA1 protein                                                | K.SGNTFRPEVHLLPPPSEELALNELVLTCLAR.G              | 2 | 4.32 | 0.41 |       |
| IPI00744561 | IGHA1 protein                                                | K.SGNTFRPEVHLLPPPSEELALNELVLTCLAR.G              | 3 | 6.86 | 0.60 |       |
| IPI00744561 | IGHA1 protein                                                | K.TFTCTAAYPESK.T                                 | 1 | 2.27 | 0.26 |       |
| IPI00744561 | IGHA1 protein                                                | K.TFTCTAAYPESK.T                                 | 2 | 4.10 | 0.40 |       |
| IPI00744561 | IGHA1 protein                                                | K.TFTCTAAYPESKPLTATLSK.S                         | 2 | 4.13 | 0.39 |       |
| IPI00744561 | IGHA1 protein                                                | K.TFTCTAAYPESKPLTATLSK.S                         | 3 | 4.01 | 0.44 |       |
| IPI00744561 | IGHA1 protein                                                | K.TPLTATLSK.S                                    | 1 | 2.18 | 0.20 |       |
| IPI00744561 | IGHA1 protein                                                | K.TPLTATLSK.S                                    | 2 | 2.50 | 0.14 |       |
| IPI00744561 | IGHA1 protein                                                | K.VFPLSLCSTQPDGNVVIACLQVGFQPEPLSVTWSESGQGV.TAR.N | 3 | 3.85 | 0.24 |       |
| IPI00744561 | IGHA1 protein                                                | K.YLTWASR.Q                                      | 1 | 1.98 | 0.18 |       |
| IPI00744561 | IGHA1 protein                                                | K.YLTWASR.Q                                      | 2 | 1.93 | 0.24 |       |
| IPI00744561 | IGHA1 protein                                                | Q.EPSQGTTFFAVTSILR.V                             | 2 | 3.82 | 0.43 | -5.84 |
| IPI00744561 | IGHA1 protein                                                | R.DASGVFTWTPSSGK.S                               | 1 | 3.53 | 0.45 |       |
| IPI00744561 | IGHA1 protein                                                | R.DASGVFTWTPSSGK.S                               | 2 | 5.30 | 0.49 |       |
| IPI00744561 | IGHA1 protein                                                | R.DLCGCYSVSSVLPGCAEPWNHGK.T                      | 2 | 4.99 | 0.09 |       |
| IPI00744561 | IGHA1 protein                                                | R.DLCGCYSVSSVLPGCAEPWNHGK.T                      | 3 | 3.41 | 0.09 |       |
| IPI00744561 | IGHA1 protein                                                | R.EKYLTVASR.Q                                    | 1 | 2.49 | 0.27 |       |
| IPI00744561 | IGHA1 protein                                                | R.GFSPKDVLR.W                                    | 2 | 2.81 | 0.13 |       |
| IPI00744561 | IGHA1 protein                                                | R.NFPPSQDASGDLYTTSSQLTLPATQCLAGK.S               | 2 | 4.34 | 0.48 |       |
| IPI00744561 | IGHA1 protein                                                | R.NFPPSQDASGDLYTTSSQLTLPATQCLAGK.S               | 3 | 5.77 | 0.57 |       |
| IPI00744561 | IGHA1 protein                                                | R.QEPSQGTTFFAVTSILR.V                            | 2 | 4.27 | 0.52 |       |
| IPI00744561 | IGHA1 protein                                                | R.QEPSQGTTFFAVTSILR.V                            | 3 | 4.05 | 0.27 |       |
| IPI00744561 | IGHA1 protein                                                | R.SVTAADTAVYFCAR.H                               | 2 | 4.47 | 0.35 |       |
| IPI00744561 | IGHA1 protein                                                | R.TGAIDYWGQGLVTVSSASPTSPK.V                      | 3 | 3.51 | 0.16 |       |
| IPI00744561 | IGHA1 protein                                                | R.VAAEDWK.K                                      | 2 | 2.23 | 0.16 |       |
| IPI00744561 | IGHA1 protein                                                | R.WLQGSQELPR.E                                   | 1 | 3.00 | 0.19 |       |
| IPI00744561 | IGHA1 protein                                                | R.WLQGSQELPR.E                                   | 2 | 3.80 | 0.33 |       |
| IPI00744561 | IGHA1 protein                                                | R.WLQGSQELPREK.Y                                 | 2 | 2.71 | 0.15 |       |
| IPI00744561 | IGHA1 protein                                                | W.GQGLTVTVSSASPTSPK.V                            | 2 | 5.02 | 0.45 |       |
| IPI00744692 | Transaldolase                                                | K.FAADAVKLER.M                                   | 2 | 2.84 | 0.18 | -2.94 |
| IPI00744692 | Transaldolase                                                | K.LVPVLSAK.A                                     | 1 | 1.72 | 0.22 | -2.48 |
| IPI00744692 | Transaldolase                                                | R.KLGGQEDQIK.N                                   | 2 | 3.05 | 0.11 | -3.73 |
| IPI00744692 | Transaldolase                                                | R.LSFDKAM*VAR.A                                  | 2 | 2.68 | 0.24 | -1.14 |
| IPI00744706 | 282 kDa protein                                              | R.LEESLEYQQFVANVEEEEAWINEK.M                     | 3 | 4.25 | 0.38 | -2.67 |
| IPI00744811 | Low-density lipoprotein receptor-related protein 5 precursor | K.QTYLNQTGAAVQNVVISGLVSPDGLACDWVVGKK.L           | 3 | 3.40 | 0.10 |       |
| IPI00744825 | Conserved hypothetical protein                               | K.HTECVCVVCVVCVVCVHSSNCK.K                       | 3 | 1.99 | 0.25 | 1.19  |
| IPI00744835 | Isoform Sap-mu-9 of Proactivator polypeptide precursor       | D.NGDVCQDCIQM*VTDIQTAVR.T                        | 2 | 5.50 | 0.45 | -3.98 |
| IPI00744835 | Isoform Sap-mu-9 of Proactivator polypeptide precursor       | D.NGDVCQDCIQM*VTDIQTAVR.T                        | 3 | 4.10 | 0.37 | -3.48 |

|             |                                                        |                                       |   |      |      |       |
|-------------|--------------------------------------------------------|---------------------------------------|---|------|------|-------|
| IPI00744835 | Isoform Sap-mu-9 of Proactivator polypeptide precursor | D.VYCEVCEFLVK.E                       | 1 | 3.24 | 0.27 | -2.50 |
| IPI00744835 | Isoform Sap-mu-9 of Proactivator polypeptide precursor | D.VYCEVCEFLVK.E                       | 2 | 4.44 | 0.46 | -5.17 |
| IPI00744835 | Isoform Sap-mu-9 of Proactivator polypeptide precursor | E.IVDSYLPVILDIK.G                     | 2 | 4.12 | 0.40 | -4.24 |
| IPI00744835 | Isoform Sap-mu-9 of Proactivator polypeptide precursor | K.DGGFCEVCK.K                         | 2 | 2.45 | 0.35 | -0.85 |
| IPI00744835 | Isoform Sap-mu-9 of Proactivator polypeptide precursor | K.DNGDVCQDCIQM*VTDIQTAVR.T            | 2 | 4.67 | 0.41 |       |
| IPI00744835 | Isoform Sap-mu-9 of Proactivator polypeptide precursor | K.DNGDVCQDCIQM*VTDIQTAVR.T            | 3 | 5.65 | 0.35 |       |
| IPI00744835 | Isoform Sap-mu-9 of Proactivator polypeptide precursor | K.DVVTAAGDM*LK.D                      | 2 | 2.65 | 0.21 | -1.81 |
| IPI00744835 | Isoform Sap-mu-9 of Proactivator polypeptide precursor | K.EICALVGFCDEVK.E                     | 2 | 3.49 | 0.42 | -2.51 |
| IPI00744835 | Isoform Sap-mu-9 of Proactivator polypeptide precursor | K.EICALVGFCDEVKEM*PM*QTLVPAK.V        | 3 | 2.64 | 0.26 | 2.54  |
| IPI00744835 | Isoform Sap-mu-9 of Proactivator polypeptide precursor | K.EILDAFDK.M                          | 1 | 2.32 | 0.25 | -2.23 |
| IPI00744835 | Isoform Sap-mu-9 of Proactivator polypeptide precursor | K.EILDAFDK.M                          | 2 | 2.37 | 0.07 | -1.75 |
| IPI00744835 | Isoform Sap-mu-9 of Proactivator polypeptide precursor | K.EIVDSYLPVILDIK.G                    | 1 | 3.03 | 0.41 | -3.92 |
| IPI00744835 | Isoform Sap-mu-9 of Proactivator polypeptide precursor | K.EIVDSYLPVILDIK.G                    | 2 | 5.50 | 0.49 | -5.55 |
| IPI00744835 | Isoform Sap-mu-9 of Proactivator polypeptide precursor | K.EIVDSYLPVILDIK.G                    | 3 | 5.22 | 0.45 | -4.52 |
| IPI00744835 | Isoform Sap-mu-9 of Proactivator polypeptide precursor | K.EIVDSYLPVILDIK GEM*SRPGEVCSALNLC.E  | 3 | 5.00 | 0.51 | -4.08 |
| IPI00744835 | Isoform Sap-mu-9 of Proactivator polypeptide precursor | K.EIVDSYLPVILDIK GEM*SRPGEVCSALNLCS.L | 3 | 4.34 | 0.34 | -4.74 |
| IPI00744835 | Isoform Sap-mu-9 of Proactivator polypeptide precursor | K.EM*PM*QTLVPAK.V                     | 2 | 2.19 | 0.25 | -3.75 |
| IPI00744835 | Isoform Sap-mu-9 of Proactivator polypeptide precursor | K.GCSFLDPYQK.Q                        | 1 | 2.33 | 0.25 | -2.66 |
| IPI00744835 | Isoform Sap-mu-9 of Proactivator polypeptide precursor | K.GCSFLDPYQK.Q                        | 2 | 3.28 | 0.29 | -3.98 |
| IPI00744835 | Isoform Sap-mu-9 of Proactivator polypeptide precursor | K.HEVPAKSDVYCEVCEFLVK.E               | 4 | 3.32 | 0.22 | -4.14 |
| IPI00744835 | Isoform Sap-mu-9 of Proactivator polypeptide precursor | K.KLVGYLDR.N                          | 1 | 2.44 | 0.26 | -3.56 |

|             |                                                           |                                          |   |      |      |       |
|-------------|-----------------------------------------------------------|------------------------------------------|---|------|------|-------|
| IPI00744835 | Isoform Sap-mu-9 of Proactivator polypeptide precursor    | K.KLVGYLDR.N                             | 2 | 3.13 | 0.24 | -1.63 |
| IPI00744835 | Isoform Sap-mu-9 of Proactivator polypeptide precursor    | K.LVGYLDR.N                              | 1 | 2.05 | 0.08 | -2.18 |
| IPI00744835 | Isoform Sap-mu-9 of Proactivator polypeptide precursor    | K.LVGYLDR.N                              | 2 | 2.62 | 0.26 | -3.76 |
| IPI00744835 | Isoform Sap-mu-9 of Proactivator polypeptide precursor    | K.LVGYLDRNLEK.N                          | 2 | 3.01 | 0.09 | -3.01 |
| IPI00744835 | Isoform Sap-mu-9 of Proactivator polypeptide precursor    | K.NVIPALELVEPIK.K                        | 2 | 2.47 | 0.22 | -3.54 |
| IPI00744835 | Isoform Sap-mu-9 of Proactivator polypeptide precursor    | K.NVIPALELVEPIKK.H                       | 2 | 2.49 | 0.34 | -1.75 |
| IPI00744835 | Isoform Sap-mu-9 of Proactivator polypeptide precursor    | K.QCDQFVAEYEPVLEILVEVM*DPSFVCLK.I        | 3 | 4.20 | 0.41 | -4.30 |
| IPI00744835 | Isoform Sap-mu-9 of Proactivator polypeptide precursor    | K.QEILAALEK.G                            | 1 | 2.83 | 0.15 | -3.05 |
| IPI00744835 | Isoform Sap-mu-9 of Proactivator polypeptide precursor    | K.QEILAALEK.G                            | 2 | 2.30 | 0.13 | -2.95 |
| IPI00744835 | Isoform Sap-mu-9 of Proactivator polypeptide precursor    | K.QLESNKIPELDM*TEVVAPFM*ANIPLLLYPQDGPR.S | 3 | 5.22 | 0.41 | -3.63 |
| IPI00744835 | Isoform Sap-mu-9 of Proactivator polypeptide precursor    | K.QLESNKIPELDM*TEVVAPFM*ANIPLLLYPQDGPR.S | 4 | 4.73 | 0.31 | -4.23 |
| IPI00744835 | Isoform Sap-mu-9 of Proactivator polypeptide precursor    | K.SDVYCEVCEFLVK.E                        | 2 | 4.50 | 0.50 | -3.64 |
| IPI00744835 | Isoform Sap-mu-9 of Proactivator polypeptide precursor    | K.SDVYCEVCEFLVK.E                        | 3 | 2.76 | 0.27 | -1.22 |
| IPI00744835 | Isoform Sap-mu-9 of Proactivator polypeptide precursor    | K.SLPCDICKDVVTAAGDM*LK.D                 | 3 | 2.72 | 0.18 | -1.71 |
| IPI00744835 | Isoform Sap-mu-9 of Proactivator polypeptide precursor    | N.GDVCQDCIQM*VTDIQTAVR.T                 | 2 | 6.29 | 0.54 | -4.29 |
| IPI00744835 | Isoform Sap-mu-9 of Proactivator polypeptide precursor    | N.GDVCQDCIQM*VTDIQTAVR.T                 | 3 | 5.48 | 0.50 | -3.55 |
| IPI00744835 | Isoform Sap-mu-9 of Proactivator polypeptide precursor    | R.LGPGM*ADICK.N                          | 2 | 3.08 | 0.18 | -1.82 |
| IPI00744835 | Isoform Sap-mu-9 of Proactivator polypeptide precursor    | R.LPALTVHVTQPK.D                         | 2 | 3.89 | 0.50 | -4.14 |
| IPI00744835 | Isoform Sap-mu-9 of Proactivator polypeptide precursor    | R.LPALTVHVTQPK.D                         | 3 | 2.97 | 0.32 | -3.58 |
| IPI00744835 | Isoform Sap-mu-9 of Proactivator polypeptide precursor    | S.DVYCEVCEFLVK.E                         | 2 | 4.32 | 0.34 | -5.01 |
| IPI00745103 | similar to melanoma associated antigen (mutated) 1-like 1 | R.SQEPTAIAPTPGALPGDR.S                   | 3 | 2.66 | 0.19 |       |
| IPI00745122 | Conserved hypothetical protein                            | R.VSLSTLK.A                              | 1 | 1.34 | 0.05 | -0.50 |



|             |                                                       |                                          |   |      |      |       |
|-------------|-------------------------------------------------------|------------------------------------------|---|------|------|-------|
| IPI00745251 | Mannosyl-oligosaccharide 1,2-alpha-mannosidase IC     | K.LGPEAFWFNSGR.E                         | 2 | 3.64 | 0.47 | -5.09 |
| IPI00745251 | Mannosyl-oligosaccharide 1,2-alpha-mannosidase IC     | K.LLPAFNTPTGIPK.G                        | 2 | 2.94 | 0.28 | -3.25 |
| IPI00745251 | Mannosyl-oligosaccharide 1,2-alpha-mannosidase IC     | R.ADESQEPQSQVR.A                         | 2 | 3.75 | 0.27 | -3.41 |
| IPI00745251 | Mannosyl-oligosaccharide 1,2-alpha-mannosidase IC     | R.ELAAQITK.T                             | 2 | 2.17 | 0.16 | -3.17 |
| IPI00745251 | Mannosyl-oligosaccharide 1,2-alpha-mannosidase IC     | R.FDFNAFR.S                              | 2 | 2.13 | 0.22 | -2.17 |
| IPI00745251 | Mannosyl-oligosaccharide 1,2-alpha-mannosidase IC     | R.YIGGLLSAFYLTGEEVFR.I                   | 2 | 5.50 | 0.53 | -3.40 |
| IPI00745251 | Mannosyl-oligosaccharide 1,2-alpha-mannosidase IC     | R.YIGGLLSAFYLTGEEVFR.I                   | 3 | 3.28 | 0.24 | -2.35 |
| IPI00745300 | 31 kDa protein                                        | K.KLSVVAAAAMGRK.S                        | 2 | 1.72 | 0.17 |       |
| IPI00745313 | adipocyte enhancer binding protein 1 precursor        | K.IYAM*EISDNPGEHELGEPEFR.Y               | 3 | 3.38 | 0.43 | -2.63 |
| IPI00745313 | adipocyte enhancer binding protein 1 precursor        | K.NPFVLGANLNGGER.L                       | 2 | 3.84 | 0.23 | -1.81 |
| IPI00745313 | adipocyte enhancer binding protein 1 precursor        | R.FTGVITQGR.N                            | 2 | 2.81 | 0.15 | -0.74 |
| IPI00745313 | adipocyte enhancer binding protein 1 precursor        | R.TPTQEQLLAAAM*AAAR.G                    | 2 | 4.87 | 0.42 | -4.31 |
| IPI00745313 | adipocyte enhancer binding protein 1 precursor        | R.TPTQEQLLAAAM*AAAR.G                    | 3 | 4.07 | 0.27 | -2.57 |
| IPI00745313 | adipocyte enhancer binding protein 1 precursor        | R.TPTQEQLLAAAM*AAARGEDEVSEAEQETPDHAIFR.W | 4 | 4.11 | 0.36 | -2.72 |
| IPI00745313 | adipocyte enhancer binding protein 1 precursor        | R.VTAHAEGYTPSAK.T                        | 2 | 2.08 | 0.21 | -3.53 |
| IPI00745313 | adipocyte enhancer binding protein 1 precursor        | R.VTAHAEGYTPSAK.T                        | 3 | 3.51 | 0.40 | -4.50 |
| IPI00745313 | adipocyte enhancer binding protein 1 precursor        | R.YTAGIHGNEVLGR.E                        | 2 | 3.51 | 0.21 | -3.93 |
| IPI00745363 | Immunoglobulin heavy chain variable region (Fragment) | -.LVQLVESGGGLVQPGR.S                     | 1 | 2.81 | 0.11 |       |
| IPI00745363 | Immunoglobulin heavy chain variable region (Fragment) | -.LVQLVESGGGLVQPGR.S                     | 2 | 2.68 | 0.09 |       |
| IPI00745363 | Immunoglobulin heavy chain variable region (Fragment) | K.AYGGTTEYAASVK.G                        | 2 | 2.91 | 0.28 |       |
| IPI00745363 | Immunoglobulin heavy chain variable region (Fragment) | K.GLEWVG FIR.S                           | 2 | 3.18 | 0.23 |       |
| IPI00745363 | Immunoglobulin heavy chain variable region (Fragment) | K.SIAYLQM*NSLK.T                         | 2 | 2.24 | 0.12 |       |
| IPI00745363 | Immunoglobulin heavy chain variable region (Fragment) | K.SIAYLQMNSLK.T                          | 2 | 3.69 | 0.32 |       |
| IPI00745363 | Immunoglobulin heavy chain variable region (Fragment) | K.TEDTAVYYCTR.D                          | 2 | 4.38 | 0.33 |       |
| IPI00745363 | Immunoglobulin heavy chain variable region (Fragment) | R.DDSKSIAYLQM*NSLK.T                     | 2 | 2.59 | 0.11 |       |
| IPI00745363 | Immunoglobulin heavy chain variable region (Fragment) | R.FTISRDDSK.N                            | 2 | 2.52 | 0.15 |       |

|             |                                                       |                                   |   |      |      |       |
|-------------|-------------------------------------------------------|-----------------------------------|---|------|------|-------|
| IPI00745363 | Immunoglobulin heavy chain variable region (Fragment) | R.QAPGKGLEWVGFIR.S                | 3 | 2.69 | 0.25 |       |
| IPI00745660 | IGL@ protein                                          | K.ADGSPVKAGVETTKPSK.Q             | 2 | 3.18 | 0.20 |       |
| IPI00745660 | IGL@ protein                                          | K.ADGSPVKAGVETTKPSK.Q             | 3 | 3.41 | 0.23 |       |
| IPI00745660 | IGL@ protein                                          | K.AGVETTKPSK.Q                    | 2 | 2.24 | 0.11 | -2.24 |
| IPI00745660 | IGL@ protein                                          | K.ANPTVTLFPPSSEELQANK.A           | 2 | 4.70 | 0.37 |       |
| IPI00745660 | IGL@ protein                                          | K.ATLVCLISDFYPGAVTVAWK.A          | 2 | 5.07 | 0.50 |       |
| IPI00745660 | IGL@ protein                                          | K.ATLVCLISDFYPGAVTVAWK.A          | 3 | 3.53 | 0.31 | -3.63 |
| IPI00745660 | IGL@ protein                                          | K.QSNNKYAASSYLSLTPEQWK.S          | 2 | 5.38 | 0.37 |       |
| IPI00745660 | IGL@ protein                                          | K.QSNNKYAASSYLSLTPEQWK.S          | 3 | 4.26 | 0.33 |       |
| IPI00745660 | IGL@ protein                                          | K.VTVLGQPK.A                      | 1 | 2.16 | 0.20 |       |
| IPI00745660 | IGL@ protein                                          | K.VTVLGQPK.A                      | 2 | 2.72 | 0.15 |       |
| IPI00745660 | IGL@ protein                                          | K.YAASSYLSLTPEQWK.S               | 1 | 3.49 | 0.43 |       |
| IPI00745660 | IGL@ protein                                          | K.YAASSYLSLTPEQWK.S               | 2 | 5.52 | 0.47 |       |
| IPI00745660 | IGL@ protein                                          | K.YAASSYLSLTPEQWK.S               | 3 | 3.44 | 0.22 |       |
| IPI00745660 | IGL@ protein                                          | R.SYSCQVTHEGSTVEK.T               | 1 | 3.84 | 0.43 |       |
| IPI00745660 | IGL@ protein                                          | R.SYSCQVTHEGSTVEK.T               | 2 | 3.17 | 0.41 | -4.10 |
| IPI00745660 | IGL@ protein                                          | R.SYSCQVTHEGSTVEKTVAPTECS.-       | 2 | 5.35 | 0.45 |       |
| IPI00745660 | IGL@ protein                                          | R.SYSCQVTHEGSTVEKTVAPTECS.-       | 3 | 2.78 | 0.26 |       |
| IPI00746177 | similar to Tubulin alpha-2 chain                      | R.FDGALNVDLTFQTNLVPYPR.I          | 2 | 5.18 | 0.51 | -1.99 |
| IPI00746177 | similar to Tubulin alpha-2 chain                      | R.FDGALNVDLTFQTNLVPYPR.I          | 3 | 2.65 | 0.18 | -2.07 |
| IPI00746388 | Ezrin                                                 | K.APDFVIFYAPR.L                   | 2 | 2.34 | 0.35 | -2.52 |
| IPI00746388 | Ezrin                                                 | K.FYPEDVAEELIQDITQK.L             | 3 | 2.49 | 0.21 | -3.70 |
| IPI00746388 | Ezrin                                                 | K.IGFPWSEIR.N                     | 2 | 2.60 | 0.06 | -0.69 |
| IPI00746388 | Ezrin                                                 | R.AKFYPEDVAEELIQDITQK.L           | 3 | 3.44 | 0.09 | -2.60 |
| IPI00746388 | Ezrin                                                 | R.NISFNDKK.F                      | 1 | 2.19 | 0.08 | -3.97 |
| IPI00746388 | Ezrin                                                 | R.QLLTLSELSQAR.D                  | 2 | 3.96 | 0.42 | -2.98 |
| IPI00746388 | Ezrin                                                 | R.VTTM*DAELEFAIQPNTTGK.Q          | 2 | 4.94 | 0.48 | -3.40 |
| IPI00746623 | Hyaluronan-binding protein 2 precursor                | K.ATIKSESGF.-                     | 1 | 2.43 | 0.32 | -2.42 |
| IPI00746623 | Hyaluronan-binding protein 2 precursor                | K.ATIKSESGF.-                     | 2 | 3.32 | 0.41 | -1.28 |
| IPI00746623 | Hyaluronan-binding protein 2 precursor                | K.FCEIGSDDCYVGDGYSYR.G            | 2 | 5.90 | 0.54 | -4.38 |
| IPI00746623 | Hyaluronan-binding protein 2 precursor                | K.FCEIGSDDCYVGDGYSYR.G            | 3 | 4.61 | 0.56 | -2.94 |
| IPI00746623 | Hyaluronan-binding protein 2 precursor                | K.LIANTLCNSR.Q                    | 2 | 2.46 | 0.29 | -1.03 |
| IPI00746623 | Hyaluronan-binding protein 2 precursor                | K.RPGVYTQVTK.F                    | 2 | 2.68 | 0.18 | -2.67 |
| IPI00746623 | Hyaluronan-binding protein 2 precursor                | K.TVCLPDGSFSPSGSECHISGWGVTTETGK.G | 3 | 2.80 | 0.31 | -3.50 |
| IPI00746623 | Hyaluronan-binding protein 2 precursor                | K.VVLGDQDLK.K                     | 2 | 2.99 | 0.32 | -1.19 |
| IPI00746623 | Hyaluronan-binding protein 2 precursor                | K.VVLGDQDLKKEEFHEQSFR.V           | 3 | 4.82 | 0.47 | -2.70 |
| IPI00746623 | Hyaluronan-binding protein 2 precursor                | K.VVLGDQDLKKEEFHEQSFRVEK.I        | 3 | 4.80 | 0.44 | -3.69 |
| IPI00746623 | Hyaluronan-binding protein 2 precursor                | K.YSHYNERDEIPHNDIALLK.L           | 2 | 4.48 | 0.48 | -4.81 |
| IPI00746623 | Hyaluronan-binding protein 2 precursor                | K.YSHYNERDEIPHNDIALLK.L           | 3 | 4.04 | 0.31 | -4.40 |
| IPI00746623 | Hyaluronan-binding protein 2 precursor                | K.YSHYNERDEIPHNDIALLK.L           | 4 | 2.80 | 0.29 | -3.72 |
| IPI00746623 | Hyaluronan-binding protein 2 precursor                | R.GQCLITQSPYYR.C                  | 2 | 4.05 | 0.45 | -3.52 |

|             |                                                                                    |                                             |   |      |      |       |
|-------------|------------------------------------------------------------------------------------|---------------------------------------------|---|------|------|-------|
| IPI00746623 | Hyaluronan-binding protein 2 precursor                                             | R.IYGGFK.S                                  | 1 | 1.46 | 0.09 | -2.25 |
| IPI00746623 | Hyaluronan-binding protein 2 precursor                                             | R.QLYDHM*IDDSM*ICAGNLQKPGQDTCQGDSGGPLTCEK.D | 4 | 5.19 | 0.45 | -3.27 |
| IPI00746666 | hypothetical protein                                                               | R.NDWGSCGFMVPEAARGK.V                       | 2 | 2.20 | 0.11 | -4.66 |
| IPI00746681 | Similar to Bcl-2-related ovarian killer protein                                    | R.STSMAATRVGGAAPAGTSAQPGGGR.R               | 2 | 1.99 | 0.20 |       |
| IPI00746963 | IGKC protein                                                                       | C.DIQLTQSPSFLSASVGD.R.V                     | 2 | 5.93 | 0.33 |       |
| IPI00746963 | IGKC protein                                                                       | K.ADYEKHKVYACEVTHQGLSSPVTK.S                | 3 | 6.20 | 0.45 |       |
| IPI00746963 | IGKC protein                                                                       | K.DSTYLSSTLTLSK.A                           | 1 | 3.19 | 0.31 |       |
| IPI00746963 | IGKC protein                                                                       | K.DSTYLSSTLTLSK.A                           | 2 | 2.59 | 0.17 | -2.80 |
| IPI00746963 | IGKC protein                                                                       | K.DSTYLSSTLTLSK.A                           | 3 | 3.23 | 0.27 |       |
| IPI00746963 | IGKC protein                                                                       | K.HKVYACEVTHQGLSSPVTK.S                     | 3 | 4.56 | 0.36 |       |
| IPI00746963 | IGKC protein                                                                       | K.RTVAAPSVFIFPPSDEQLK.S                     | 2 | 5.74 | 0.42 |       |
| IPI00746963 | IGKC protein                                                                       | K.RTVAAPSVFIFPPSDEQLK.S                     | 3 | 4.14 | 0.22 |       |
| IPI00746963 | IGKC protein                                                                       | K.SGTASVVCLLNNFYPR.E                        | 1 | 4.08 | 0.39 |       |
| IPI00746963 | IGKC protein                                                                       | K.SGTASVVCLLNNFYPR.E                        | 2 | 3.05 | 0.36 | -5.56 |
| IPI00746963 | IGKC protein                                                                       | K.SGTASVVCLLNNFYPR.E                        | 3 | 4.63 | 0.31 |       |
| IPI00746963 | IGKC protein                                                                       | K.VDNALQSGNSQESVTEQDSK.D                    | 2 | 5.40 | 0.58 | -3.51 |
| IPI00746963 | IGKC protein                                                                       | K.VDNALQSGNSQESVTEQDSK.D                    | 3 | 4.56 | 0.42 | -2.63 |
| IPI00746963 | IGKC protein                                                                       | K.VDNALQSGNSQESVTEQDSKDYLSSTLTLSK.A         | 2 | 3.56 | 0.49 |       |
| IPI00746963 | IGKC protein                                                                       | K.VDNALQSGNSQESVTEQDSKDYLSSTLTLSK.A         | 3 | 6.26 | 0.51 |       |
| IPI00746963 | IGKC protein                                                                       | K.VDNALQSGNSQESVTEQDSKDYLSSTLTLSKADYK.H     | 3 | 4.65 | 0.36 |       |
| IPI00746963 | IGKC protein                                                                       | K.VQWKVDNALQSGNSQESVTEQDSK.D                | 2 | 5.17 | 0.41 |       |
| IPI00746963 | IGKC protein                                                                       | K.VQWKVDNALQSGNSQESVTEQDSK.D                | 3 | 6.42 | 0.38 |       |
| IPI00746963 | IGKC protein                                                                       | K.VQWKVDNALQSGNSQESVTEQDSKDYLSSTLTLSK.A     | 3 | 5.65 | 0.43 |       |
| IPI00746963 | IGKC protein                                                                       | K.VYACEVTHQGLSSPVTK.S                       | 1 | 4.33 | 0.48 |       |
| IPI00746963 | IGKC protein                                                                       | K.VYACEVTHQGLSSPVTK.S                       | 2 | 5.40 | 0.48 |       |
| IPI00746963 | IGKC protein                                                                       | K.VYACEVTHQGLSSPVTK.S                       | 3 | 4.16 | 0.44 |       |
| IPI00746963 | IGKC protein                                                                       | Q.SGNSQESVTEQDSKDYLSSTLTLSK.A               | 3 | 6.25 | 0.52 |       |
| IPI00746963 | IGKC protein                                                                       | R.TVAAPSVF.-                                | 1 | 1.75 | 0.12 |       |
| IPI00746963 | IGKC protein                                                                       | R.TVAAPSVFIFPPSDEQLK.S                      | 1 | 3.65 | 0.48 |       |
| IPI00746963 | IGKC protein                                                                       | R.TVAAPSVFIFPPSDEQLK.S                      | 2 | 4.89 | 0.48 |       |
| IPI00746963 | IGKC protein                                                                       | R.TVAAPSVFIFPPSDEQLK.S                      | 3 | 4.07 | 0.25 |       |
| IPI00746963 | IGKC protein                                                                       | R.TVAAPSVFIFPPSDEQLKSGTASVVCLLNNFYPR.E      | 3 | 5.23 | 0.48 |       |
| IPI00746963 | IGKC protein                                                                       | V.YACEVTHQGLSSPVTK.S                        | 2 | 5.14 | 0.43 |       |
| IPI00746987 | Ribosomal protein S1 family protein                                                | R.VKNPADVLTGDK.V                            | 2 | 1.95 | 0.09 | -2.99 |
| IPI00747142 | Centaurin-gamma-like family member 6                                               | -.MFEDVFSDSGNTGNFDRGKKRR.L                  | 2 | 1.26 | 0.16 | -6.00 |
| IPI00747420 | Melanoma-derived protein (Fragment)                                                | K.QIGVTSITGMCQCLVRLGEREGSAGEMVM*GHS LGDK.R  | 5 | 3.33 | 0.11 | -3.91 |
| IPI00747494 | Glutamate receptor delta-2 subunit precursor                                       | R.TAVGDLNQNEEILQTEK.I                       | 2 | 5.19 | 0.48 | -2.10 |
| IPI00747657 | Similar to Rod cGMP-specific 3',5'-cyclic phosphodiesterase subunit beta precursor | R.LPPHPMRGPFQLSSPQAFSQGLR.C                 | 3 | 2.00 | 0.13 | 0.22  |
| IPI00747849 | Isoform 1 of Sodium/potassium-transporting ATPase subunit beta-1                   | K.AYGENIGYSEKDR.F                           | 2 | 2.90 | 0.44 | -2.63 |

|             |                                                                  |                                      |   |      |      |       |
|-------------|------------------------------------------------------------------|--------------------------------------|---|------|------|-------|
| IPI00747849 | Isoform 1 of Sodium/potassium-transporting ATPase subunit beta-1 | K.SYEAYVLNIVR.F                      | 2 | 3.70 | 0.34 | -2.44 |
| IPI00747849 | Isoform 1 of Sodium/potassium-transporting ATPase subunit beta-1 | R.DEDKDKVGNVEYFGLGNSPGFPLQYYPYGGK.L  | 4 | 2.86 | 0.13 | -2.82 |
| IPI00747849 | Isoform 1 of Sodium/potassium-transporting ATPase subunit beta-1 | R.VAPPGLTQIPQIK.T                    | 2 | 3.37 | 0.42 | -1.47 |
| IPI00748265 | Rheumatoid factor RF-ET13                                        | K.ALEWLAHIFSNDEK.S                   | 2 | 3.58 | 0.29 |       |
| IPI00748265 | Rheumatoid factor RF-ET13                                        | K.SQVVLTM*TNM*DPVDTATYYCAR.I         | 2 | 3.37 | 0.26 |       |
| IPI00748265 | Rheumatoid factor RF-ET13                                        | R.LTISKDTSK.N                        | 2 | 2.83 | 0.20 |       |
| IPI00748312 | protein tyrosine phosphatase, receptor-type, zeta1 precursor     | G.TEEIIEEEEEGKDIEEGAVNPGR.D          | 3 | 5.65 | 0.39 | -2.26 |
| IPI00748312 | protein tyrosine phosphatase, receptor-type, zeta1 precursor     | K.AIIDGVESVSR.F                      | 1 | 2.00 | 0.23 | -3.42 |
| IPI00748312 | protein tyrosine phosphatase, receptor-type, zeta1 precursor     | K.AIIDGVESVSR.F                      | 2 | 3.56 | 0.33 | -4.25 |
| IPI00748312 | protein tyrosine phosphatase, receptor-type, zeta1 precursor     | K.ATSELSHSAK.S                       | 2 | 2.75 | 0.32 | -2.48 |
| IPI00748312 | protein tyrosine phosphatase, receptor-type, zeta1 precursor     | K.FAVLYQQLDGEDQTK.H                  | 2 | 5.31 | 0.53 | -3.58 |
| IPI00748312 | protein tyrosine phosphatase, receptor-type, zeta1 precursor     | K.FPLEM*QIYCFDADR.F                  | 2 | 3.94 | 0.40 | -3.47 |
| IPI00748312 | protein tyrosine phosphatase, receptor-type, zeta1 precursor     | K.HNDGKEENDIQTGSALLPLSPESK.A         | 2 | 4.90 | 0.53 | -4.30 |
| IPI00748312 | protein tyrosine phosphatase, receptor-type, zeta1 precursor     | K.HNDGKEENDIQTGSALLPLSPESK.A         | 3 | 3.42 | 0.34 | -3.65 |
| IPI00748312 | protein tyrosine phosphatase, receptor-type, zeta1 precursor     | K.ITFHWGK.C                          | 2 | 1.62 | 0.06 | -2.82 |
| IPI00748312 | protein tyrosine phosphatase, receptor-type, zeta1 precursor     | K.LVEEIGWSYTGALNQK.N                 | 2 | 5.50 | 0.54 | -4.59 |
| IPI00748312 | protein tyrosine phosphatase, receptor-type, zeta1 precursor     | K.QSPINIDEDLTQVNVNLK.K               | 2 | 4.85 | 0.55 | -1.92 |
| IPI00748312 | protein tyrosine phosphatase, receptor-type, zeta1 precursor     | K.QSPINIDEDLTQVNVNLK.K               | 3 | 4.40 | 0.29 | -1.13 |
| IPI00748312 | protein tyrosine phosphatase, receptor-type, zeta1 precursor     | K.QSPINIDEDLTQVNVNLK.L               | 2 | 3.59 | 0.43 | -2.37 |
| IPI00748312 | protein tyrosine phosphatase, receptor-type, zeta1 precursor     | K.QSPINIDEDLTQVNVNLK.L               | 3 | 3.34 | 0.34 | -5.26 |
| IPI00748312 | protein tyrosine phosphatase, receptor-type, zeta1 precursor     | K.SDAGLVGGGEDGTDGDDDDDDDRGSDGLSIHK.C | 3 | 5.78 | 0.68 | -4.24 |
| IPI00748312 | protein tyrosine phosphatase, receptor-type, zeta1 precursor     | K.SDAGLVGGGEDGTDGDDDDDDDRGSDGLSIHK.C | 4 | 4.78 | 0.54 | -3.72 |

|             |                                                              |                                         |   |      |      |       |
|-------------|--------------------------------------------------------------|-----------------------------------------|---|------|------|-------|
| IPI00748312 | protein tyrosine phosphatase, receptor-type, zeta1 precursor | K.SESSHQVVPSLYSNDELFTANLEINQAHPK.G      | 4 | 2.97 | 0.13 | -3.42 |
| IPI00748312 | protein tyrosine phosphatase, receptor-type, zeta1 precursor | K.SPSANGLSQK.H                          | 2 | 2.73 | 0.27 | -0.30 |
| IPI00748312 | protein tyrosine phosphatase, receptor-type, zeta1 precursor | K.TSLENTFIHNTGK.T                       | 1 | 2.62 | 0.21 | -5.29 |
| IPI00748312 | protein tyrosine phosphatase, receptor-type, zeta1 precursor | K.TSLENTFIHNTGK.T                       | 2 | 4.42 | 0.41 | -2.92 |
| IPI00748312 | protein tyrosine phosphatase, receptor-type, zeta1 precursor | K.TVEINLTNDYR.V                         | 2 | 3.74 | 0.26 | -2.01 |
| IPI00748312 | protein tyrosine phosphatase, receptor-type, zeta1 precursor | K.YEPVLLK.S                             | 2 | 1.92 | 0.08 | -2.06 |
| IPI00748312 | protein tyrosine phosphatase, receptor-type, zeta1 precursor | L.IGTEEIIKEEEEGKDIEEGAIVNPGR.D          | 3 | 5.17 | 0.40 | -1.15 |
| IPI00748312 | protein tyrosine phosphatase, receptor-type, zeta1 precursor | N.DIQTGSALLPLSPESK.A                    | 2 | 4.09 | 0.43 | -6.22 |
| IPI00748312 | protein tyrosine phosphatase, receptor-type, zeta1 precursor | N.PELDLFPELIGTEEIIKEEEEGKDIEEGAIVNPGR.D | 3 | 5.57 | 0.47 | -4.01 |
| IPI00748312 | protein tyrosine phosphatase, receptor-type, zeta1 precursor | N.PELDLFPELIGTEEIIKEEEEGKDIEEGAIVNPGR.D | 4 | 6.17 | 0.49 | -5.19 |
| IPI00748312 | protein tyrosine phosphatase, receptor-type, zeta1 precursor | N.PGRDSATNQIR.K                         | 3 | 3.81 | 0.31 | -4.26 |
| IPI00748312 | protein tyrosine phosphatase, receptor-type, zeta1 precursor | N.SEEDNRVTSVSSDSQTGM*DR.S               | 3 | 5.42 | 0.46 | -1.13 |
| IPI00748312 | protein tyrosine phosphatase, receptor-type, zeta1 precursor | R.ALSILFEVGTEENLDFK.A                   | 2 | 5.02 | 0.46 | -5.81 |
| IPI00748312 | protein tyrosine phosphatase, receptor-type, zeta1 precursor | R.DSATNQIR.K                            | 2 | 2.68 | 0.15 | -3.22 |
| IPI00748312 | protein tyrosine phosphatase, receptor-type, zeta1 precursor | R.FSSFEEAVK.G                           | 1 | 2.01 | 0.19 | -3.67 |
| IPI00748312 | protein tyrosine phosphatase, receptor-type, zeta1 precursor | R.FSSFEEAVK.G                           | 2 | 2.46 | 0.25 | -3.18 |
| IPI00748312 | protein tyrosine phosphatase, receptor-type, zeta1 precursor | R.GSEFSGKGDVPN.T                        | 1 | 1.82 | 0.34 | -5.12 |
| IPI00748312 | protein tyrosine phosphatase, receptor-type, zeta1 precursor | R.IGLAEGLESEK.K                         | 2 | 2.91 | 0.31 | -2.54 |
| IPI00748312 | protein tyrosine phosphatase, receptor-type, zeta1 precursor | R.IGLAEGLESEK.K                         | 2 | 2.74 | 0.27 | -1.56 |
| IPI00748312 | protein tyrosine phosphatase, receptor-type, zeta1 precursor | R.IGTKYNEAK.T                           | 2 | 2.39 | 0.15 | 0.55  |
| IPI00748312 | protein tyrosine phosphatase, receptor-type, zeta1 precursor | R.KLVEEIGWSYTGALNQK.N                   | 2 | 5.91 | 0.54 | -3.32 |

|             |                                                              |                                |   |      |      |       |
|-------------|--------------------------------------------------------------|--------------------------------|---|------|------|-------|
| IPI00748312 | protein tyrosine phosphatase, receptor-type, zeta1 precursor | R.KLVEEIGWSYTGALNQK.N          | 3 | 3.61 | 0.26 | -3.57 |
| IPI00748312 | protein tyrosine phosphatase, receptor-type, zeta1 precursor | R.SPGKSPSANGLSQK.H             | 2 | 3.63 | 0.40 | -4.02 |
| IPI00748312 | protein tyrosine phosphatase, receptor-type, zeta1 precursor | R.SPGKSPSANGLSQK.H             | 3 | 2.95 | 0.31 | -2.90 |
| IPI00748312 | protein tyrosine phosphatase, receptor-type, zeta1 precursor | R.VSGGVSEM*VFK.A               | 1 | 2.19 | 0.13 | -2.39 |
| IPI00748312 | protein tyrosine phosphatase, receptor-type, zeta1 precursor | R.VSGGVSEM*VFK.A               | 2 | 3.70 | 0.30 | -2.44 |
| IPI00748312 | protein tyrosine phosphatase, receptor-type, zeta1 precursor | R.VSGGVSEMVFK.A                | 2 | 2.49 | 0.20 | -4.14 |
| IPI00748312 | protein tyrosine phosphatase, receptor-type, zeta1 precursor | R.VTSVSSDSQTGM*DR.S            | 2 | 4.03 | 0.54 | -3.89 |
| IPI00748312 | protein tyrosine phosphatase, receptor-type, zeta1 precursor | R.VVYDTM*IEK.F                 | 1 | 2.62 | 0.26 | -4.93 |
| IPI00748312 | protein tyrosine phosphatase, receptor-type, zeta1 precursor | R.VVYDTM*IEK.F                 | 2 | 2.67 | 0.29 | -3.74 |
| IPI00748312 | protein tyrosine phosphatase, receptor-type, zeta1 precursor | S.RIGLAEGLESEKK.A              | 2 | 3.26 | 0.29 | -4.88 |
| IPI00748312 | protein tyrosine phosphatase, receptor-type, zeta1 precursor | S.RIGLAEGLESEKK.A              | 3 | 4.47 | 0.40 | -4.00 |
| IPI00748312 | protein tyrosine phosphatase, receptor-type, zeta1 precursor | W.DKTSLENTFIHNTGK.T            | 3 | 4.13 | 0.33 | -1.25 |
| IPI00748682 | Pheromone shutdown-related, TraB family protein              | R.QWPFAPDGHPQLSDPCSPLA.-       | 3 | 1.44 | 0.13 | 0.09  |
| IPI00748890 | Isoform 1 of Leucine zipper protein 2 precursor              | K.SKPQQSASGNNESSQVESTK.E       | 3 | 4.32 | 0.44 | -3.05 |
| IPI00748891 | hypothetical protein LOC283635 isoform 1                     | A.TTM*DQEPVGGVER.G             | 2 | 3.52 | 0.47 | -3.90 |
| IPI00748955 | platelet glycoprotein Ib alpha polypeptide precursor         | R.LTSLPLGALR.G                 | 2 | 2.44 | 0.14 | -1.08 |
| IPI00749171 | Conserved hypothetical protein                               | K.YEKHLLLTLSACQQNFTK.A         | 2 | 2.23 | 0.12 |       |
| IPI00749245 | Secreted frizzled-related protein 1 precursor                | K.QQASSWVPLLNK.N               | 2 | 2.90 | 0.21 | -2.59 |
| IPI00749328 | hypothetical protein                                         | K.RPGDLPEVLSFHVDR.V            | 2 | 3.02 | 0.16 | -4.08 |
| IPI00749328 | hypothetical protein                                         | K.RPGDLPEVLSFHVDR.V            | 3 | 4.54 | 0.39 | -1.96 |
| IPI00749328 | hypothetical protein                                         | R.DLLGAENR.A                   | 2 | 2.59 | 0.13 | -2.26 |
| IPI00749328 | hypothetical protein                                         | R.LSQLCSQGLCGLIK.R             | 2 | 4.23 | 0.43 | -2.72 |
| IPI00749328 | hypothetical protein                                         | R.SSDPSHLVYIDNAGNLQHPEDKLNFR.L | 5 | 2.84 | 0.15 | -0.18 |
| IPI00749440 | Uncharacterized protein ENSP00000368180                      | K.IQVLQQQADDAEER.A             | 2 | 4.75 | 0.49 | -4.03 |
| IPI00749514 | attractin-like 1                                             | K.SIYVHGGYK.A                  | 2 | 1.71 | 0.16 | -1.63 |
| IPI00749514 | attractin-like 1                                             | K.YGLVDDLYKYEVNTK.T            | 3 | 2.92 | 0.35 | -1.58 |
| IPI00760721 | 13 kDa protein                                               | C.EVQLVESGGGLIQPGGSLR.L        | 2 | 5.97 | 0.20 |       |
| IPI00760721 | 13 kDa protein                                               | K.NTLYLQMNSLR.A                | 1 | 3.28 | 0.09 |       |
| IPI00760721 | 13 kDa protein                                               | K.NTLYLQMNSLR.A                | 2 | 4.45 | 0.07 |       |

|             |                |                                            |   |      |      |       |
|-------------|----------------|--------------------------------------------|---|------|------|-------|
| IPI00760721 | 13 kDa protein | R.DNSKNTLYLQM*NSLR.A                       | 2 | 3.02 | 0.07 |       |
| IPI00760721 | 13 kDa protein | R.DNSKNTLYLQM*NSLR.A                       | 3 | 3.90 | 0.23 |       |
| IPI00761159 | IGHM protein   | C.DKHTCPCPCAPPELLGGPSVFLFPPKPK.D           | 3 | 6.55 | 0.38 |       |
| IPI00761159 | IGHM protein   | K.ALPAPIEK.T                               | 1 | 1.81 | 0.11 |       |
| IPI00761159 | IGHM protein   | K.CKVSNKALPAPIEK.T                         | 2 | 2.28 | 0.15 |       |
| IPI00761159 | IGHM protein   | K.DTLM*ISR.T                               | 2 | 2.48 | 0.09 | -3.74 |
| IPI00761159 | IGHM protein   | K.DTLMISR.T                                | 1 | 2.38 | 0.13 |       |
| IPI00761159 | IGHM protein   | K.DTLMISR.T                                | 2 | 2.45 | 0.16 |       |
| IPI00761159 | IGHM protein   | K.FNWYVDGVEVHNAK.T                         | 1 | 3.93 | 0.41 |       |
| IPI00761159 | IGHM protein   | K.FNWYVDGVEVHNAK.T                         | 2 | 5.51 | 0.51 |       |
| IPI00761159 | IGHM protein   | K.FNWYVDGVEVHNAK.T                         | 3 | 3.99 | 0.38 |       |
| IPI00761159 | IGHM protein   | K.GFYPSDIAVEWESNGQPENNYK.T                 | 2 | 4.88 | 0.31 |       |
| IPI00761159 | IGHM protein   | K.GFYPSDIAVEWESNGQPENNYK.T                 | 3 | 4.56 | 0.26 |       |
| IPI00761159 | IGHM protein   | K.GFYPSDIAVEWESNGQPENNYKTPPVLDSDGSFFLYSK.L | 3 | 4.64 | 0.25 |       |
| IPI00761159 | IGHM protein   | K.GPSVFPLAPSSK.S                           | 1 | 3.15 | 0.35 |       |
| IPI00761159 | IGHM protein   | K.GPSVFPLAPSSK.S                           | 2 | 3.30 | 0.36 |       |
| IPI00761159 | IGHM protein   | K.GPSVFPLAPSSKSTSGGTAALGCLVK.D             | 2 | 4.62 | 0.48 |       |
| IPI00761159 | IGHM protein   | K.GPSVFPLAPSSKSTSGGTAALGCLVK.D             | 3 | 4.18 | 0.48 |       |
| IPI00761159 | IGHM protein   | K.GQPREPQVYTLPPSR.E                        | 2 | 2.89 | 0.13 |       |
| IPI00761159 | IGHM protein   | K.GQPREPQVYTLPPSR.E                        | 3 | 2.92 | 0.17 |       |
| IPI00761159 | IGHM protein   | K.GQPREPQVYTLPPSREEM*TK.N                  | 3 | 3.87 | 0.30 |       |
| IPI00761159 | IGHM protein   | K.GQPREPQVYTLPPSREEM*TKNQVSLTCLVK.G        | 3 | 3.18 | 0.26 |       |
| IPI00761159 | IGHM protein   | K.GQPREPQVYTLPPSREEMTK.N                   | 3 | 3.97 | 0.17 |       |
| IPI00761159 | IGHM protein   | K.NQVSLTCLVK.G                             | 1 | 2.26 | 0.22 |       |
| IPI00761159 | IGHM protein   | K.NQVSLTCLVK.G                             | 2 | 2.44 | 0.28 | -2.15 |
| IPI00761159 | IGHM protein   | K.SCDKHTCPCPCAPPELLGGPSVFLFPPKPK.D         | 3 | 6.71 | 0.47 |       |
| IPI00761159 | IGHM protein   | K.THTCPCPCAPPELLGGPSVFLFPPKPK.D            | 2 | 3.81 | 0.39 |       |
| IPI00761159 | IGHM protein   | K.THTCPCPCAPPELLGGPSVFLFPPKPK.D            | 3 | 6.29 | 0.52 |       |
| IPI00761159 | IGHM protein   | K.TKPREEQYNSTYR.V                          | 2 | 2.99 | 0.10 |       |
| IPI00761159 | IGHM protein   | K.TTPPVLDSDGSFFLYSK.L                      | 1 | 3.22 | 0.41 |       |
| IPI00761159 | IGHM protein   | K.TTPPVLDSDGSFFLYSK.L                      | 2 | 3.42 | 0.37 |       |
| IPI00761159 | IGHM protein   | K.TTPPVLDSDGSFFLYSK.L                      | 3 | 4.11 | 0.39 |       |
| IPI00761159 | IGHM protein   | K.VSNKALPAPIEK.T                           | 2 | 3.33 | 0.18 |       |
| IPI00761159 | IGHM protein   | K.WYVDGVEVHNAK.T                           | 1 | 2.91 | 0.35 |       |
| IPI00761159 | IGHM protein   | K.WYVDGVEVHNAK.T                           | 2 | 3.90 | 0.46 |       |
| IPI00761159 | IGHM protein   | K.WYVDGVEVHNAK.T                           | 3 | 2.99 | 0.21 |       |
| IPI00761159 | IGHM protein   | R.CAPPELLGGPSVFLFPPKPK.D                   | 2 | 4.00 | 0.37 |       |
| IPI00761159 | IGHM protein   | R.CAPPELLGGPSVFLFPPKPK.D                   | 3 | 6.31 | 0.49 |       |
| IPI00761159 | IGHM protein   | R.CAPPELLGGPSVFLFPPKPKDTLM*ISR.T           | 3 | 3.77 | 0.23 |       |
| IPI00761159 | IGHM protein   | R.EEM*TKNQVSLTCLVK.G                       | 2 | 3.75 | 0.32 |       |
| IPI00761159 | IGHM protein   | R.EPQVYTLPPSREEM*TK.N                      | 1 | 2.26 | 0.37 |       |
| IPI00761159 | IGHM protein   | R.EPQVYTLPPSREEM*TK.N                      | 2 | 4.02 | 0.44 |       |

|             |                                                                       |                                 |   |      |      |       |
|-------------|-----------------------------------------------------------------------|---------------------------------|---|------|------|-------|
| IPI00761159 | IGHM protein                                                          | R.EPQVYTLPPSREEM*TKNQVSLTCLVK.G | 3 | 2.94 | 0.15 |       |
| IPI00761159 | IGHM protein                                                          | R.EPQVYTLPPSREEMTK.N            | 1 | 2.97 | 0.15 |       |
| IPI00761159 | IGHM protein                                                          | R.EPQVYTLPPSREEMTK.N            | 2 | 3.92 | 0.38 |       |
| IPI00761159 | IGHM protein                                                          | R.EPQVYTLPPSREEMTKNQVSLTCLVK.G  | 3 | 3.59 | 0.25 |       |
| IPI00761159 | IGHM protein                                                          | R.STSGGTAALGCLVK.D              | 1 | 2.45 | 0.34 |       |
| IPI00761159 | IGHM protein                                                          | R.STSGGTAALGCLVK.D              | 2 | 4.37 | 0.45 |       |
| IPI00761159 | IGHM protein                                                          | R.TPEVTCVVVDVSHED.P             | 2 | 5.50 | 0.52 |       |
| IPI00761159 | IGHM protein                                                          | R.VVSVLTVLHQDWLNGK.E            | 1 | 4.22 | 0.41 |       |
| IPI00761159 | IGHM protein                                                          | R.VVSVLTVLHQDWLNGK.E            | 2 | 5.39 | 0.46 |       |
| IPI00761159 | IGHM protein                                                          | R.VVSVLTVLHQDWLNGK.E            | 3 | 3.42 | 0.38 |       |
| IPI00761159 | IGHM protein                                                          | R.VVSVLTVLHQDWLNGKEYK.C         | 2 | 5.56 | 0.40 |       |
| IPI00761159 | IGHM protein                                                          | R.VVSVLTVLHQDWLNGKEYK.C         | 3 | 4.97 | 0.40 |       |
| IPI00783024 | Myosin-reactive immunoglobulin heavy chain variable region (Fragment) | K.SKTDGGTTDYAAPVKGR.F           | 2 | 4.37 | 0.47 |       |
| IPI00783024 | Myosin-reactive immunoglobulin heavy chain variable region (Fragment) | K.SKTDGGTTDYAAPVKGR.F           | 3 | 4.84 | 0.37 |       |
| IPI00783024 | Myosin-reactive immunoglobulin heavy chain variable region (Fragment) | K.TDGGTTDYAAPVKGR.F             | 2 | 4.36 | 0.39 |       |
| IPI00783024 | Myosin-reactive immunoglobulin heavy chain variable region (Fragment) | R.IKSKTDGGTTDYAAPVK.G           | 3 | 3.34 | 0.24 |       |
| IPI00783024 | Myosin-reactive immunoglobulin heavy chain variable region (Fragment) | R.LSCAASGFTFSKAWM*SWVR.Q        | 3 | 2.86 | 0.23 |       |
| IPI00783156 | Bone morphogenetic protein receptor type-2 precursor                  | K.DPYQQDLGIGESR.I               | 2 | 3.79 | 0.23 | -2.29 |
| IPI00783156 | Bone morphogenetic protein receptor type-2 precursor                  | K.SKGDINLVK.Q                   | 2 | 1.99 | 0.14 | -0.97 |
| IPI00783184 | Immunoglobulin heavy chain variable region (Fragment)                 | K.NTLYLQM*NSLK.T                | 2 | 2.43 | 0.12 |       |
| IPI00783184 | Immunoglobulin heavy chain variable region (Fragment)                 | K.NTLYLQMNSLK.T                 | 2 | 3.59 | 0.08 |       |
| IPI00783184 | Immunoglobulin heavy chain variable region (Fragment)                 | R.DDSKNTLYLQM*NSLK.T            | 2 | 4.53 | 0.27 |       |
| IPI00783184 | Immunoglobulin heavy chain variable region (Fragment)                 | R.DDSKNTLYLQM*NSLK.T            | 3 | 3.61 | 0.23 |       |
| IPI00783184 | Immunoglobulin heavy chain variable region (Fragment)                 | R.FTISRDDSK.N                   | 2 | 2.52 | 0.15 |       |
| IPI00783287 | Immunoglobulin heavy chain variable region (Fragment)                 | K.GLEWVANIK.Z                   | 1 | 2.05 | 0.11 |       |
| IPI00783287 | Immunoglobulin heavy chain variable region (Fragment)                 | K.GLEWVANIK.Z                   | 2 | 3.69 | 0.25 |       |
| IPI00783287 | Immunoglobulin heavy chain variable region (Fragment)                 | K.NSLYLQM*NSLR.A                | 2 | 3.76 | 0.14 |       |



|             |                                                                      |                                      |   |      |      |       |
|-------------|----------------------------------------------------------------------|--------------------------------------|---|------|------|-------|
| IPI00783287 | Immunoglobulin heavy chain variable region (Fragment)                | K.NSLYLQMNSLR.A                      | 1 | 3.55 | 0.11 |       |
| IPI00783287 | Immunoglobulin heavy chain variable region (Fragment)                | K.NSLYLQMNSLR.A                      | 2 | 4.01 | 0.17 |       |
| IPI00783287 | Immunoglobulin heavy chain variable region (Fragment)                | R.DNAKNSLYLQM*NSLR.A                 | 2 | 4.82 | 0.44 |       |
| IPI00783287 | Immunoglobulin heavy chain variable region (Fragment)                | R.DNAKNSLYLQM*NSLR.A                 | 3 | 4.39 | 0.37 |       |
| IPI00783287 | Immunoglobulin heavy chain variable region (Fragment)                | R.YYVDSVR.G                          | 2 | 2.32 | 0.18 |       |
| IPI00783313 | Glycogen phosphorylase, liver form                                   | R.LKQEYFVVAATLQDIIR.R                | 3 | 3.33 | 0.27 | -2.88 |
| IPI00783390 | Isoform 1 of Neural cell adhesion molecule L1-like protein precursor | A.IEIPSSVQQVPTIIK.Q                  | 1 | 2.58 | 0.32 | -3.22 |
| IPI00783390 | Isoform 1 of Neural cell adhesion molecule L1-like protein precursor | A.IEIPSSVQQVPTIIK.Q                  | 2 | 4.57 | 0.41 | -3.82 |
| IPI00783390 | Isoform 1 of Neural cell adhesion molecule L1-like protein precursor | A.IEIPSSVQQVPTIIK.Q                  | 3 | 5.36 | 0.35 | -3.07 |
| IPI00783390 | Isoform 1 of Neural cell adhesion molecule L1-like protein precursor | C.TASNFLGTATHDFHVIVEEPPR.W           | 3 | 4.78 | 0.49 | -6.62 |
| IPI00783390 | Isoform 1 of Neural cell adhesion molecule L1-like protein precursor | F.AGDVVFPR.E                         | 2 | 3.30 | 0.23 | -1.47 |
| IPI00783390 | Isoform 1 of Neural cell adhesion molecule L1-like protein precursor | I.ENVSYQDKGNYSR.C                    | 2 | 3.08 | 0.35 | -3.51 |
| IPI00783390 | Isoform 1 of Neural cell adhesion molecule L1-like protein precursor | I.PSSVQQVPTIIK.Q                     | 2 | 3.78 | 0.29 | -2.47 |
| IPI00783390 | Isoform 1 of Neural cell adhesion molecule L1-like protein precursor | K.DGEAFEINGTEDGR.I                   | 2 | 5.08 | 0.51 | -3.06 |
| IPI00783390 | Isoform 1 of Neural cell adhesion molecule L1-like protein precursor | K.DGENYATVVGYS AFLHCEFFASPEAVVSWQK.V | 3 | 5.81 | 0.53 | -3.43 |
| IPI00783390 | Isoform 1 of Neural cell adhesion molecule L1-like protein precursor | K.DGNPFYFTDHR.I                      | 1 | 2.37 | 0.22 | -1.95 |
| IPI00783390 | Isoform 1 of Neural cell adhesion molecule L1-like protein precursor | K.DGNPFYFTDHR.I                      | 2 | 3.28 | 0.40 | -3.15 |
| IPI00783390 | Isoform 1 of Neural cell adhesion molecule L1-like protein precursor | K.DGNPFYFTDHR.I                      | 3 | 1.71 | 0.11 | -0.62 |
| IPI00783390 | Isoform 1 of Neural cell adhesion molecule L1-like protein precursor | K.DSRNDYCCFAAFPR.L                   | 2 | 3.30 | 0.29 | -1.24 |
| IPI00783390 | Isoform 1 of Neural cell adhesion molecule L1-like protein precursor | K.DSRNDYCCFAAFPR.L                   | 3 | 3.52 | 0.43 | -2.05 |
| IPI00783390 | Isoform 1 of Neural cell adhesion molecule L1-like protein precursor | K.EKIDPLEVEEGD.P                     | 2 | 3.66 | 0.30 | -2.92 |
| IPI00783390 | Isoform 1 of Neural cell adhesion molecule L1-like protein precursor | K.EKIDPLEVEEGDPIVLPNPPK.G            | 2 | 4.85 | 0.42 | -3.47 |

|             |                                                                      |                               |   |      |      |       |
|-------------|----------------------------------------------------------------------|-------------------------------|---|------|------|-------|
| IPI00783390 | Isoform 1 of Neural cell adhesion molecule L1-like protein precursor | K.EKIDPLEVEEGDPIVLPCNPPK.G    | 3 | 5.69 | 0.45 | -3.96 |
| IPI00783390 | Isoform 1 of Neural cell adhesion molecule L1-like protein precursor | K.EKIDPLEVEEGDPIVLPCNPPK.G    | 4 | 3.40 | 0.26 | -2.07 |
| IPI00783390 | Isoform 1 of Neural cell adhesion molecule L1-like protein precursor | K.EM*IIKWEPLK.S               | 2 | 3.10 | 0.21 | -2.37 |
| IPI00783390 | Isoform 1 of Neural cell adhesion molecule L1-like protein precursor | K.EM*IIKWEPLK.S               | 3 | 2.93 | 0.18 | -1.91 |
| IPI00783390 | Isoform 1 of Neural cell adhesion molecule L1-like protein precursor | K.EM*IIKWEPLKSM*EQNGPGLEYR.V  | 4 | 2.71 | 0.12 | -2.75 |
| IPI00783390 | Isoform 1 of Neural cell adhesion molecule L1-like protein precursor | K.GAGPESEPYIFQTPEGVPEQPTFLK.V | 2 | 5.03 | 0.56 | -5.30 |
| IPI00783390 | Isoform 1 of Neural cell adhesion molecule L1-like protein precursor | K.GAGPESEPYIFQTPEGVPEQPTFLK.V | 3 | 5.61 | 0.46 | -5.25 |
| IPI00783390 | Isoform 1 of Neural cell adhesion molecule L1-like protein precursor | K.GDLYFANVEEK.D               | 1 | 2.42 | 0.39 | -3.98 |
| IPI00783390 | Isoform 1 of Neural cell adhesion molecule L1-like protein precursor | K.GDLYFANVEEK.D               | 2 | 3.87 | 0.37 | -4.03 |
| IPI00783390 | Isoform 1 of Neural cell adhesion molecule L1-like protein precursor | K.GDLYFANVEEKDS.R             | 2 | 3.05 | 0.29 | -0.73 |
| IPI00783390 | Isoform 1 of Neural cell adhesion molecule L1-like protein precursor | K.GDLYFANVEEKDSR.N            | 2 | 4.06 | 0.44 | -2.35 |
| IPI00783390 | Isoform 1 of Neural cell adhesion molecule L1-like protein precursor | K.GDLYFANVEEKDSR.N            | 3 | 3.21 | 0.37 | -1.02 |
| IPI00783390 | Isoform 1 of Neural cell adhesion molecule L1-like protein precursor | K.GDLYFANVEEKDSRNDYCCFAAFPR.L | 3 | 3.20 | 0.20 | -0.61 |
| IPI00783390 | Isoform 1 of Neural cell adhesion molecule L1-like protein precursor | K.GEILLLECFAEGLPTPQVDWNK.I    | 2 | 5.02 | 0.51 | -6.79 |
| IPI00783390 | Isoform 1 of Neural cell adhesion molecule L1-like protein precursor | K.GEILLLECFAEGLPTPQVDWNK.I    | 3 | 3.49 | 0.25 | -5.04 |
| IPI00783390 | Isoform 1 of Neural cell adhesion molecule L1-like protein precursor | K.GLPPLHIYWM*NIELEHIEQDER.V   | 3 | 3.83 | 0.39 | -3.33 |
| IPI00783390 | Isoform 1 of Neural cell adhesion molecule L1-like protein precursor | K.GNPEPTFSWTK.D               | 1 | 2.14 | 0.28 | -3.00 |
| IPI00783390 | Isoform 1 of Neural cell adhesion molecule L1-like protein precursor | K.GNPEPTFSWTK.D               | 2 | 2.14 | 0.32 | -3.82 |
| IPI00783390 | Isoform 1 of Neural cell adhesion molecule L1-like protein precursor | K.GYQINWWK.T                  | 2 | 2.65 | 0.25 | -1.55 |
| IPI00783390 | Isoform 1 of Neural cell adhesion molecule L1-like protein precursor | K.IDPLEVEEGDPIVLPCNPPK.G      | 2 | 5.17 | 0.46 | -5.35 |
| IPI00783390 | Isoform 1 of Neural cell adhesion molecule L1-like protein precursor | K.IDPLEVEEGDPIVLPCNPPK.G      | 3 | 5.09 | 0.37 | -5.38 |

|             |                                                                      |                                            |   |      |      |       |
|-------------|----------------------------------------------------------------------|--------------------------------------------|---|------|------|-------|
| IPI00783390 | Isoform 1 of Neural cell adhesion molecule L1-like protein precursor | K.IENVSQDK.G                               | 1 | 2.64 | 0.27 | -3.25 |
| IPI00783390 | Isoform 1 of Neural cell adhesion molecule L1-like protein precursor | K.IENVSQDK.G                               | 2 | 3.04 | 0.20 | -6.51 |
| IPI00783390 | Isoform 1 of Neural cell adhesion molecule L1-like protein precursor | K.IENVSQDKGNR.C                            | 2 | 4.39 | 0.52 | -3.17 |
| IPI00783390 | Isoform 1 of Neural cell adhesion molecule L1-like protein precursor | K.IENVSQDKGNR.C                            | 3 | 2.29 | 0.16 | -2.12 |
| IPI00783390 | Isoform 1 of Neural cell adhesion molecule L1-like protein precursor | K.IGGDLPK.G                                | 1 | 2.06 | 0.12 | -2.35 |
| IPI00783390 | Isoform 1 of Neural cell adhesion molecule L1-like protein precursor | K.ISGVNLTQK.T                              | 1 | 2.19 | 0.11 | -3.21 |
| IPI00783390 | Isoform 1 of Neural cell adhesion molecule L1-like protein precursor | K.ISGVNLTQK.T                              | 2 | 3.03 | 0.30 | -2.32 |
| IPI00783390 | Isoform 1 of Neural cell adhesion molecule L1-like protein precursor | K.KPQSAVYSTGSNGILLCEAEGEPQPTIK.W           | 3 | 3.36 | 0.37 | -4.13 |
| IPI00783390 | Isoform 1 of Neural cell adhesion molecule L1-like protein precursor | K.KTTVILPLPFVR.Y                           | 1 | 3.41 | 0.42 | -3.83 |
| IPI00783390 | Isoform 1 of Neural cell adhesion molecule L1-like protein precursor | K.KTTVILPLPFVR.Y                           | 2 | 3.92 | 0.36 | -5.09 |
| IPI00783390 | Isoform 1 of Neural cell adhesion molecule L1-like protein precursor | K.KTTVILPLPFVR.Y                           | 3 | 3.50 | 0.30 | -3.12 |
| IPI00783390 | Isoform 1 of Neural cell adhesion molecule L1-like protein precursor | K.LGIAM*SEEIEFIVPSVPK.F                    | 2 | 3.11 | 0.24 | -3.26 |
| IPI00783390 | Isoform 1 of Neural cell adhesion molecule L1-like protein precursor | K.LGIAM*SEEIEFIVPSVPKFK.E                  | 2 | 4.50 | 0.47 | -3.09 |
| IPI00783390 | Isoform 1 of Neural cell adhesion molecule L1-like protein precursor | K.LGIAM*SEEIEFIVPSVPKFK.E                  | 3 | 5.36 | 0.47 | -7.75 |
| IPI00783390 | Isoform 1 of Neural cell adhesion molecule L1-like protein precursor | K.LLLPPTESGSESSITLK.G                      | 2 | 2.74 | 0.47 | -6.14 |
| IPI00783390 | Isoform 1 of Neural cell adhesion molecule L1-like protein precursor | K.LLLPPTESGSESSITLK.G                      | 3 | 5.35 | 0.54 | -4.00 |
| IPI00783390 | Isoform 1 of Neural cell adhesion molecule L1-like protein precursor | K.LLLPPTESGSESSITLKGEILLLECFEAELPTQVDWNK.I | 4 | 3.33 | 0.19 | -1.73 |
| IPI00783390 | Isoform 1 of Neural cell adhesion molecule L1-like protein precursor | K.LTVNSSNSIK.Q                             | 1 | 2.07 | 0.06 | -2.17 |
| IPI00783390 | Isoform 1 of Neural cell adhesion molecule L1-like protein precursor | K.LTVNSSNSIK.Q                             | 2 | 3.00 | 0.28 | -0.94 |
| IPI00783390 | Isoform 1 of Neural cell adhesion molecule L1-like protein precursor | K.SM*EQNGPGLEYR.V                          | 2 | 3.98 | 0.45 | -3.35 |
| IPI00783390 | Isoform 1 of Neural cell adhesion molecule L1-like protein precursor | K.TAVTANLDIR.N                             | 1 | 2.24 | 0.19 | -3.68 |

|             |                                                                      |                       |   |      |      |       |
|-------------|----------------------------------------------------------------------|-----------------------|---|------|------|-------|
| IPI00783390 | Isoform 1 of Neural cell adhesion molecule L1-like protein precursor | K.TAVTANLDIR.N        | 2 | 3.58 | 0.33 | -4.21 |
| IPI00783390 | Isoform 1 of Neural cell adhesion molecule L1-like protein precursor | K.THPVEVFEPGAEH.I     | 2 | 3.54 | 0.47 | -3.64 |
| IPI00783390 | Isoform 1 of Neural cell adhesion molecule L1-like protein precursor | K.THPVEVFEPGAEH.I     | 3 | 3.54 | 0.29 | -2.49 |
| IPI00783390 | Isoform 1 of Neural cell adhesion molecule L1-like protein precursor | K.THPVEVFEPGAEHIV.R   | 2 | 4.08 | 0.52 | -2.90 |
| IPI00783390 | Isoform 1 of Neural cell adhesion molecule L1-like protein precursor | K.THPVEVFEPGAEHIVR.L  | 2 | 4.64 | 0.49 | -3.61 |
| IPI00783390 | Isoform 1 of Neural cell adhesion molecule L1-like protein precursor | K.THPVEVFEPGAEHIVR.L  | 3 | 3.70 | 0.47 | -3.09 |
| IPI00783390 | Isoform 1 of Neural cell adhesion molecule L1-like protein precursor | K.THPVEVFEPGAEHIVR.L  | 4 | 3.08 | 0.24 | -2.81 |
| IPI00783390 | Isoform 1 of Neural cell adhesion molecule L1-like protein precursor | K.TKSLDGR.T           | 1 | 1.99 | 0.11 | -1.32 |
| IPI00783390 | Isoform 1 of Neural cell adhesion molecule L1-like protein precursor | K.TLKIENVSYQDK.G      | 1 | 3.05 | 0.34 | -3.45 |
| IPI00783390 | Isoform 1 of Neural cell adhesion molecule L1-like protein precursor | K.TLKIENVSYQDK.G      | 2 | 4.25 | 0.40 | -3.79 |
| IPI00783390 | Isoform 1 of Neural cell adhesion molecule L1-like protein precursor | K.TLKIENVSYQDK.G      | 3 | 2.60 | 0.27 | -1.28 |
| IPI00783390 | Isoform 1 of Neural cell adhesion molecule L1-like protein precursor | K.TLKIENVSYQDKGNR.C   | 2 | 5.15 | 0.54 | -4.31 |
| IPI00783390 | Isoform 1 of Neural cell adhesion molecule L1-like protein precursor | K.TLKIENVSYQDKGNR.C   | 3 | 3.80 | 0.45 | -3.32 |
| IPI00783390 | Isoform 1 of Neural cell adhesion molecule L1-like protein precursor | K.TTVILPLAPFVR.Y      | 1 | 2.70 | 0.19 | -3.73 |
| IPI00783390 | Isoform 1 of Neural cell adhesion molecule L1-like protein precursor | K.TTVILPLAPFVR.Y      | 2 | 3.66 | 0.29 | -4.32 |
| IPI00783390 | Isoform 1 of Neural cell adhesion molecule L1-like protein precursor | K.TTVILPLAPFVR.Y      | 3 | 3.41 | 0.22 | -3.67 |
| IPI00783390 | Isoform 1 of Neural cell adhesion molecule L1-like protein precursor | K.VDKDTATLSWGLPK.K    | 3 | 2.45 | 0.13 | -0.29 |
| IPI00783390 | Isoform 1 of Neural cell adhesion molecule L1-like protein precursor | K.VEEVKPLEGR.R        | 1 | 2.61 | 0.21 | -3.78 |
| IPI00783390 | Isoform 1 of Neural cell adhesion molecule L1-like protein precursor | K.VEEVKPLEGR.R        | 2 | 3.27 | 0.20 | -1.98 |
| IPI00783390 | Isoform 1 of Neural cell adhesion molecule L1-like protein precursor | K.VEEVKPLEGRR.Y       | 2 | 2.49 | 0.32 | -2.29 |
| IPI00783390 | Isoform 1 of Neural cell adhesion molecule L1-like protein precursor | K.VIKVDKDTATLSWGLPK.K | 2 | 4.67 | 0.46 | -3.28 |

|             |                                                                      |                                |   |      |      |       |
|-------------|----------------------------------------------------------------------|--------------------------------|---|------|------|-------|
| IPI00783390 | Isoform 1 of Neural cell adhesion molecule L1-like protein precursor | K.VIKVDKDTATLSWGLPK.K          | 3 | 4.80 | 0.49 | -3.48 |
| IPI00783390 | Isoform 1 of Neural cell adhesion molecule L1-like protein precursor | K.VIKVDKDTATLSWGLPK.K          | 4 | 3.33 | 0.10 | -2.07 |
| IPI00783390 | Isoform 1 of Neural cell adhesion molecule L1-like protein precursor | K.VQAINQLGSGPD.P               | 2 | 3.00 | 0.39 | -2.45 |
| IPI00783390 | Isoform 1 of Neural cell adhesion molecule L1-like protein precursor | K.VQVAFPFDEYFQIECEAK.G         | 2 | 5.71 | 0.57 | -7.38 |
| IPI00783390 | Isoform 1 of Neural cell adhesion molecule L1-like protein precursor | K.VQVAFPFDEYFQIECEAK.G         | 3 | 5.20 | 0.43 | -4.39 |
| IPI00783390 | Isoform 1 of Neural cell adhesion molecule L1-like protein precursor | K.VTWSTVPK.D                   | 2 | 2.36 | 0.17 | -1.30 |
| IPI00783390 | Isoform 1 of Neural cell adhesion molecule L1-like protein precursor | L.PPTESGSESSITLK.G             | 2 | 4.83 | 0.46 | -3.42 |
| IPI00783390 | Isoform 1 of Neural cell adhesion molecule L1-like protein precursor | N.GSPVDNHPFAGDVVFP.R.E         | 2 | 4.00 | 0.48 | -1.80 |
| IPI00783390 | Isoform 1 of Neural cell adhesion molecule L1-like protein precursor | Q.PSQPSDHHETPPAAPDRNPQNIR.V    | 3 | 3.87 | 0.44 | -2.83 |
| IPI00783390 | Isoform 1 of Neural cell adhesion molecule L1-like protein precursor | R.ACTSQGCGKPITEESSTLGEYSK.G    | 2 | 5.38 | 0.46 |       |
| IPI00783390 | Isoform 1 of Neural cell adhesion molecule L1-like protein precursor | R.ACTSQGCGKPITEESSTLGEYSK.G    | 3 | 4.41 | 0.44 | -1.32 |
| IPI00783390 | Isoform 1 of Neural cell adhesion molecule L1-like protein precursor | R.CTASNFLGTATHDFHVIVEEPPR.W    | 3 | 4.88 | 0.49 | -5.84 |
| IPI00783390 | Isoform 1 of Neural cell adhesion molecule L1-like protein precursor | R.CTASNFLGTATHDFHVIVEEPPR.W    | 4 | 4.80 | 0.40 | -4.19 |
| IPI00783390 | Isoform 1 of Neural cell adhesion molecule L1-like protein precursor | R.CTASNFLGTATHDFHVIVEEPPRWTK.K | 3 | 4.30 | 0.41 | -1.49 |
| IPI00783390 | Isoform 1 of Neural cell adhesion molecule L1-like protein precursor | R.CTASNFLGTATHDFHVIVEEPPRWTK.K | 4 | 3.24 | 0.24 | -2.29 |
| IPI00783390 | Isoform 1 of Neural cell adhesion molecule L1-like protein precursor | R.IPNEGHIHFQYK.Y               | 2 | 4.57 | 0.44 | -4.18 |
| IPI00783390 | Isoform 1 of Neural cell adhesion molecule L1-like protein precursor | R.IPNEGHIHFQYK.Y               | 3 | 3.62 | 0.21 | -3.49 |
| IPI00783390 | Isoform 1 of Neural cell adhesion molecule L1-like protein precursor | R.NDYCCFAAFPR.L                | 1 | 1.86 | 0.45 | -2.32 |
| IPI00783390 | Isoform 1 of Neural cell adhesion molecule L1-like protein precursor | R.NDYCCFAAFPR.L                | 2 | 3.63 | 0.44 | -3.18 |
| IPI00783390 | Isoform 1 of Neural cell adhesion molecule L1-like protein precursor | R.NSGM*VPSLDAFSEFHLTVLAYNSK.G  | 3 | 3.09 | 0.40 | -2.77 |
| IPI00783390 | Isoform 1 of Neural cell adhesion molecule L1-like protein precursor | R.SQPSQPSDHHETPPAAPDR.N        | 3 | 3.06 | 0.34 | -3.26 |

|             |                                                                      |                               |   |      |      |       |
|-------------|----------------------------------------------------------------------|-------------------------------|---|------|------|-------|
| IPI00783390 | Isoform 1 of Neural cell adhesion molecule L1-like protein precursor | R.SQPSQPSDHHETPPAAPDR.N       | 4 | 2.47 | 0.20 | -3.57 |
| IPI00783390 | Isoform 1 of Neural cell adhesion molecule L1-like protein precursor | R.SQPSQPSDHHETPPAAPDRNPQNIR.V | 2 | 3.61 | 0.48 | -2.87 |
| IPI00783390 | Isoform 1 of Neural cell adhesion molecule L1-like protein precursor | R.SQPSQPSDHHETPPAAPDRNPQNIR.V | 3 | 3.29 | 0.45 | -3.63 |
| IPI00783390 | Isoform 1 of Neural cell adhesion molecule L1-like protein precursor | R.SQPSQPSDHHETPPAAPDRNPQNIR.V | 5 | 2.08 | 0.32 | -2.76 |
| IPI00783390 | Isoform 1 of Neural cell adhesion molecule L1-like protein precursor | R.THPKEVNILR.F                | 2 | 1.91 | 0.40 | -4.07 |
| IPI00783390 | Isoform 1 of Neural cell adhesion molecule L1-like protein precursor | R.TTEEDAGSYSCWVVENAIGK.T      | 2 | 6.92 | 0.63 | -3.41 |
| IPI00783390 | Isoform 1 of Neural cell adhesion molecule L1-like protein precursor | R.TTEEDAGSYSCWVVENAIGK.T      | 3 | 3.68 | 0.41 | -3.53 |
| IPI00783390 | Isoform 1 of Neural cell adhesion molecule L1-like protein precursor | R.VIAVNEVGR.S                 | 1 | 2.60 | 0.24 | -2.26 |
| IPI00783390 | Isoform 1 of Neural cell adhesion molecule L1-like protein precursor | R.VIAVNEVGR.S                 | 2 | 3.46 | 0.25 | -3.16 |
| IPI00783390 | Isoform 1 of Neural cell adhesion molecule L1-like protein precursor | R.VM*TPAVYAPYDVK.V            | 1 | 2.75 | 0.38 | -3.49 |
| IPI00783390 | Isoform 1 of Neural cell adhesion molecule L1-like protein precursor | R.VM*TPAVYAPYDVK.V            | 2 | 4.20 | 0.44 | -6.05 |
| IPI00783390 | Isoform 1 of Neural cell adhesion molecule L1-like protein precursor | R.VM*TPAVYAPYDVK.V            | 3 | 3.42 | 0.22 | -1.87 |
| IPI00783390 | Isoform 1 of Neural cell adhesion molecule L1-like protein precursor | R.VNGSPVDNHPF.A               | 1 | 1.84 | 0.27 | -2.89 |
| IPI00783390 | Isoform 1 of Neural cell adhesion molecule L1-like protein precursor | R.VNGSPVDNHPFAGDVVFPR.E       | 2 | 5.26 | 0.62 | -3.33 |
| IPI00783390 | Isoform 1 of Neural cell adhesion molecule L1-like protein precursor | R.VNGSPVDNHPFAGDVVFPR.E       | 3 | 2.83 | 0.34 | -5.15 |
| IPI00783390 | Isoform 1 of Neural cell adhesion molecule L1-like protein precursor | R.VYM*SQK.G                   | 1 | 1.63 | 0.10 | -3.36 |
| IPI00783390 | Isoform 1 of Neural cell adhesion molecule L1-like protein precursor | R.VYM*SQKGDLYFANVEEK.D        | 2 | 5.00 | 0.51 | -3.21 |
| IPI00783390 | Isoform 1 of Neural cell adhesion molecule L1-like protein precursor | R.VYM*SQKGDLYFANVEEK.D        | 3 | 3.11 | 0.28 | -2.30 |
| IPI00783390 | Isoform 1 of Neural cell adhesion molecule L1-like protein precursor | R.VYM*SQKGDLYFANVEEKDSR.N     | 4 | 3.10 | 0.18 | -3.05 |
| IPI00783390 | Isoform 1 of Neural cell adhesion molecule L1-like protein precursor | S.PVDNHPFAGDVVFPR.E           | 2 | 3.62 | 0.44 | -6.18 |
| IPI00783390 | Isoform 1 of Neural cell adhesion molecule L1-like protein precursor | S.PVDNHPFAGDVVFPR.E           | 3 | 3.60 | 0.45 | -0.46 |

|             |                                                                      |                              |   |      |      |       |
|-------------|----------------------------------------------------------------------|------------------------------|---|------|------|-------|
| IPI00783390 | Isoform 1 of Neural cell adhesion molecule L1-like protein precursor | V.NGSPVDNHPFAGDVVFP.R.E      | 2 | 4.03 | 0.53 | 0.67  |
| IPI00783390 | Isoform 1 of Neural cell adhesion molecule L1-like protein precursor | Y.FANVEEKDSR.N               | 2 | 3.07 | 0.25 | -2.09 |
| IPI00783393 | Immunoglobulin heavy chain variable region (Fragment)                | K.NTLYLQMNSLR.A              | 1 | 3.28 | 0.09 |       |
| IPI00783393 | Immunoglobulin heavy chain variable region (Fragment)                | K.NTLYLQMNSLR.A              | 2 | 4.45 | 0.07 |       |
| IPI00783393 | Immunoglobulin heavy chain variable region (Fragment)                | R.DNSKNTLYLQM*NSLR.A         | 2 | 3.02 | 0.07 |       |
| IPI00783393 | Immunoglobulin heavy chain variable region (Fragment)                | R.DNSKNTLYLQM*NSLR.A         | 3 | 3.90 | 0.23 |       |
| IPI00783393 | Immunoglobulin heavy chain variable region (Fragment)                | R.LEDTAVYYCAK.K              | 2 | 4.15 | 0.27 |       |
| IPI00783399 | Isoform 1 of Transmembrane protein 132D precursor                    | G.RGILESQR.F                 | 2 | 3.11 | 0.12 | -2.92 |
| IPI00783399 | Isoform 1 of Transmembrane protein 132D precursor                    | K.DFSLM*ATSLDEK.V            | 2 | 3.30 | 0.37 | -2.87 |
| IPI00783399 | Isoform 1 of Transmembrane protein 132D precursor                    | K.DLIGVVPLAM*EAEILNTAILTGK.T | 2 | 2.51 | 0.35 | -0.49 |
| IPI00783399 | Isoform 1 of Transmembrane protein 132D precursor                    | K.DLIGVVPLAM*EAEILNTAILTGK.T | 3 | 3.45 | 0.37 | -1.50 |
| IPI00783399 | Isoform 1 of Transmembrane protein 132D precursor                    | K.FGQNDANPNTSDSR.H           | 2 | 4.25 | 0.49 | -3.96 |
| IPI00783399 | Isoform 1 of Transmembrane protein 132D precursor                    | K.KGVNIIGVR.A                | 2 | 1.71 | 0.12 | -2.60 |
| IPI00783399 | Isoform 1 of Transmembrane protein 132D precursor                    | K.SVDQPEGTPVELYYTVHPGGER.G   | 2 | 3.55 | 0.51 | -2.78 |
| IPI00783399 | Isoform 1 of Transmembrane protein 132D precursor                    | K.TITVLDEK.V                 | 2 | 2.10 | 0.22 | -2.82 |
| IPI00783399 | Isoform 1 of Transmembrane protein 132D precursor                    | K.VEM*VISESCQK.S             | 2 | 3.33 | 0.34 | -4.11 |
| IPI00783399 | Isoform 1 of Transmembrane protein 132D precursor                    | K.VVSIHQDPK.F                | 2 | 2.27 | 0.40 | -3.95 |
| IPI00783399 | Isoform 1 of Transmembrane protein 132D precursor                    | K.VVSVEDDGTVELLESVECR.S      | 2 | 4.92 | 0.56 | -5.05 |
| IPI00783399 | Isoform 1 of Transmembrane protein 132D precursor                    | K.VVSVEDDGTVELLESVECR.S      | 3 | 3.96 | 0.31 | -5.40 |
| IPI00783399 | Isoform 1 of Transmembrane protein 132D precursor                    | K.YAPAVIVCQK.K               | 2 | 2.95 | 0.34 | -3.24 |
| IPI00783399 | Isoform 1 of Transmembrane protein 132D precursor                    | R.AIFATAVAQELLQRPK.Q         | 3 | 1.94 | 0.28 | -2.26 |

|             |                                                                                 |                                 |   |      |      |       |
|-------------|---------------------------------------------------------------------------------|---------------------------------|---|------|------|-------|
| IPI00783399 | Isoform 1 of Transmembrane protein 132D precursor                               | R.IGSIFLYQTHR.K                 | 2 | 3.34 | 0.35 | -3.64 |
| IPI00783399 | Isoform 1 of Transmembrane protein 132D precursor                               | R.KGDVLTFFVSISR.N               | 2 | 3.75 | 0.37 | -3.07 |
| IPI00783399 | Isoform 1 of Transmembrane protein 132D precursor                               | R.KSVDQPEGTPVELYYTVHPGGER.G     | 3 | 4.06 | 0.41 | -2.37 |
| IPI00783399 | Isoform 1 of Transmembrane protein 132D precursor                               | R.LDNSVAIHYPK.T                 | 3 | 2.66 | 0.24 | -2.25 |
| IPI00783399 | Isoform 1 of Transmembrane protein 132D precursor                               | R.LPLQIEVSDTELNQIK.G            | 2 | 4.46 | 0.35 | -6.60 |
| IPI00783399 | Isoform 1 of Transmembrane protein 132D precursor                               | R.SNGEM*DGNDLM*QASK.G           | 2 | 3.42 | 0.45 | 2.25  |
| IPI00783399 | Isoform 1 of Transmembrane protein 132D precursor                               | R.VESFLIYK.S                    | 2 | 2.26 | 0.14 | -1.71 |
| IPI00783399 | Isoform 1 of Transmembrane protein 132D precursor                               | R.VPIVSSR.R                     | 1 | 2.03 | 0.06 | -0.45 |
| IPI00783464 | dynein heavy chain domain 3                                                     | R.TSWGQLQDEGRVGGGETCLSQR.S      | 2 | 2.65 | 0.08 | 2.68  |
| IPI00783471 | Immunoglobulin heavy chain variable region (Fragment)                           | R.LSCAASGFTFSR.Y                | 1 | 2.80 | 0.05 |       |
| IPI00783471 | Immunoglobulin heavy chain variable region (Fragment)                           | R.LSCAASGFTFSR.Y                | 2 | 4.44 | 0.08 |       |
| IPI00783492 | Isoform 2 of Latent-transforming growth factor beta-binding protein 4 precursor | R.AEAAAPYTVLAQSAPR.E            | 2 | 4.67 | 0.42 | -3.14 |
| IPI00783492 | Isoform 2 of Latent-transforming growth factor beta-binding protein 4 precursor | R.AEAAAPYTVLAQSAPR.E            | 3 | 3.47 | 0.31 | -1.98 |
| IPI00783492 | Isoform 2 of Latent-transforming growth factor beta-binding protein 4 precursor | R.CSCAPGYR.A                    | 2 | 2.10 | 0.20 |       |
| IPI00783492 | Isoform 2 of Latent-transforming growth factor beta-binding protein 4 precursor | R.DGGCSLPILR.N                  | 2 | 2.34 | 0.20 | -0.97 |
| IPI00783492 | Isoform 2 of Latent-transforming growth factor beta-binding protein 4 precursor | R.DVDECQLFR.D                   | 2 | 2.67 | 0.15 | -0.71 |
| IPI00783492 | Isoform 2 of Latent-transforming growth factor beta-binding protein 4 precursor | R.EDGYSDASGFGYCFR.E             | 2 | 4.34 | 0.58 | -2.85 |
| IPI00783492 | Isoform 2 of Latent-transforming growth factor beta-binding protein 4 precursor | R.FDM*PDFEDDGGPYGESEAPPPGPGTR.W | 3 | 3.72 | 0.14 |       |
| IPI00783492 | Isoform 2 of Latent-transforming growth factor beta-binding protein 4 precursor | R.GCQLCPPFGSEGFR.E              | 2 | 2.41 | 0.24 | -3.41 |
| IPI00783492 | Isoform 2 of Latent-transforming growth factor beta-binding protein 4 precursor | R.GGECASPLPGLR.T                | 2 | 3.32 | 0.24 | -0.86 |
| IPI00783492 | Isoform 2 of Latent-transforming growth factor beta-binding protein 4 precursor | R.GGYTCVCPDGFLLDSSR.S           | 2 | 3.28 | 0.40 | -2.56 |
| IPI00783492 | Isoform 2 of Latent-transforming growth factor beta-binding protein 4 precursor | R.REAPYGAPR.F                   | 2 | 2.60 | 0.15 | -2.49 |



|             |                                                                                 |                                   |   |      |      |       |
|-------------|---------------------------------------------------------------------------------|-----------------------------------|---|------|------|-------|
| IPI00783492 | Isoform 2 of Latent-transforming growth factor beta-binding protein 4 precursor | R.TSAGTFPGSQPQAPASVLPARPPPPPLPR.R | 3 | 3.56 | 0.46 | -2.17 |
| IPI00783492 | Isoform 2 of Latent-transforming growth factor beta-binding protein 4 precursor | R.TSAGTFPGSQPQAPASVLPARPPPPPLPR.R | 4 | 2.35 | 0.14 | -1.34 |
| IPI00783492 | Isoform 2 of Latent-transforming growth factor beta-binding protein 4 precursor | R.YNTRPLGQEPPR.V                  | 2 | 2.28 | 0.11 | -4.00 |
| IPI00783492 | Isoform 2 of Latent-transforming growth factor beta-binding protein 4 precursor | R.YNTRPLGQEPPR.V                  | 3 | 2.60 | 0.19 | -3.41 |
| IPI00783492 | Isoform 2 of Latent-transforming growth factor beta-binding protein 4 precursor | R.YNTRPLGQEPPRVLSLQPR.T           | 4 | 2.25 | 0.11 | -2.37 |
| IPI00783604 | EPH receptor A6 isoform a                                                       | K.IDTIAADESFTQM*DLGDR.I           | 2 | 4.92 | 0.53 | 0.42  |
| IPI00783665 | Laminin subunit alpha-5 precursor                                               | K.AVAEEAQDTATR.V                  | 2 | 3.53 | 0.38 | -3.37 |
| IPI00783665 | Laminin subunit alpha-5 precursor                                               | R.DLGAPQAAAEEAELAAQR.L            | 2 | 4.89 | 0.45 | -4.85 |
| IPI00783665 | Laminin subunit alpha-5 precursor                                               | R.FFLHGVTLVPIEEFSPEFVEPR.V        | 3 | 4.64 | 0.45 | -3.11 |
| IPI00783665 | Laminin subunit alpha-5 precursor                                               | R.FGPQTLER.I                      | 2 | 1.56 | 0.07 | 0.83  |
| IPI00783665 | Laminin subunit alpha-5 precursor                                               | R.GFGEPFVLNPGTWALR.V              | 2 | 3.98 | 0.40 | -4.70 |
| IPI00783665 | Laminin subunit alpha-5 precursor                                               | R.GQLQLVEGNFR.H                   | 2 | 3.74 | 0.36 | -1.98 |
| IPI00783665 | Laminin subunit alpha-5 precursor                                               | R.GYAQM*APVQPR.I                  | 2 | 2.79 | 0.23 | -3.60 |
| IPI00783665 | Laminin subunit alpha-5 precursor                                               | R.ILQAVQAAEDAAGQALQQADHTWATVVR.Q  | 3 | 4.54 | 0.47 | -4.12 |
| IPI00783665 | Laminin subunit alpha-5 precursor                                               | R.ILQAVQAAEDAAGQALQQADHTWATVVR.Q  | 4 | 4.72 | 0.45 | -3.95 |
| IPI00783665 | Laminin subunit alpha-5 precursor                                               | R.LELEEAATPEGHAVR.F               | 3 | 3.62 | 0.35 | 0.39  |
| IPI00783665 | Laminin subunit alpha-5 precursor                                               | R.TYQPWQFFASSK.R                  | 2 | 2.97 | 0.26 | -1.93 |
| IPI00783665 | Laminin subunit alpha-5 precursor                                               | R.VQSQLQAM*QENVER.W               | 2 | 3.09 | 0.34 | -3.14 |
| IPI00783689 | Immunoglobulin heavy chain variable region (Fragment)                           | K.GLEWVANIK.Z                     | 1 | 2.05 | 0.11 |       |
| IPI00783689 | Immunoglobulin heavy chain variable region (Fragment)                           | K.GLEWVANIK.Z                     | 2 | 3.69 | 0.25 |       |
| IPI00783689 | Immunoglobulin heavy chain variable region (Fragment)                           | K.NSLYLQM*NSLR.A                  | 2 | 3.76 | 0.14 |       |
| IPI00783689 | Immunoglobulin heavy chain variable region (Fragment)                           | K.NSLYLQMNSLR.A                   | 1 | 3.55 | 0.11 |       |
| IPI00783689 | Immunoglobulin heavy chain variable region (Fragment)                           | K.NSLYLQMNSLR.A                   | 2 | 4.01 | 0.17 |       |
| IPI00783689 | Immunoglobulin heavy chain variable region (Fragment)                           | K.YYVDSVK.G                       | 1 | 2.28 | 0.11 |       |
| IPI00783689 | Immunoglobulin heavy chain variable region (Fragment)                           | R.DNAKNSLYLQM*NSLR.A              | 2 | 4.82 | 0.44 |       |
| IPI00783689 | Immunoglobulin heavy chain variable region (Fragment)                           | R.DNAKNSLYLQM*NSLR.A              | 3 | 4.39 | 0.37 |       |
| IPI00783753 | UPF0235 protein C15orf40                                                        | K.LLASTTPEEILEKLEKKEAKKT.-        | 3 | 3.60 | 0.07 |       |
| IPI00783818 | Immunoglobulin heavy chain variable region (Fragment)                           | K.NTLYLQMNSLR.A                   | 1 | 3.28 | 0.09 |       |

|             |                                                      |                                        |   |      |      |       |
|-------------|------------------------------------------------------|----------------------------------------|---|------|------|-------|
| IPI00783818 | Immunglobulin heavy chain variable region (Fragment) | K.NTLYLQMNSLR.A                        | 2 | 4.45 | 0.07 |       |
| IPI00783818 | Immunglobulin heavy chain variable region (Fragment) | R.DNSKNTLYLQM*NSLR.A                   | 2 | 3.02 | 0.07 |       |
| IPI00783818 | Immunglobulin heavy chain variable region (Fragment) | R.DNSKNTLYLQM*NSLR.A                   | 3 | 3.90 | 0.23 |       |
| IPI00783855 | neighbor of BRCA1 gene 1                             | K.VSFDLNTIQIK.Y                        | 2 | 3.00 | 0.31 | -3.95 |
| IPI00783987 | Complement C3 precursor (Fragment)                   | K.AAVYHHFISDGVR.K                      | 3 | 2.99 | 0.26 |       |
| IPI00783987 | Complement C3 precursor (Fragment)                   | K.AAVYHHFISDGVRK.S                     | 2 | 3.22 | 0.28 |       |
| IPI00783987 | Complement C3 precursor (Fragment)                   | K.AAVYHHFISDGVRK.S                     | 3 | 3.47 | 0.20 |       |
| IPI00783987 | Complement C3 precursor (Fragment)                   | K.ACEPGVDYVYK.T                        | 2 | 2.96 | 0.10 |       |
| IPI00783987 | Complement C3 precursor (Fragment)                   | K.ACEPGVDYVYKTR.L                      | 2 | 3.51 | 0.30 |       |
| IPI00783987 | Complement C3 precursor (Fragment)                   | K.ADIGCTPGSGK.D                        | 2 | 3.66 | 0.27 |       |
| IPI00783987 | Complement C3 precursor (Fragment)                   | K.ADIGCTPGSGKDYAGVFSDAGLTFTSSSGQQAQR.A | 2 | 4.49 | 0.43 |       |
| IPI00783987 | Complement C3 precursor (Fragment)                   | K.ADIGCTPGSGKDYAGVFSDAGLTFTSSSGQQAQR.A | 3 | 7.36 | 0.54 |       |
| IPI00783987 | Complement C3 precursor (Fragment)                   | K.AFSDRNTLIYLDKVSHEDDCLAFK.V           | 3 | 5.48 | 0.36 |       |
| IPI00783987 | Complement C3 precursor (Fragment)                   | K.AGDFLEANYM*NLQR.S                    | 2 | 3.95 | 0.35 | -1.83 |
| IPI00783987 | Complement C3 precursor (Fragment)                   | K.AGDFLEANYM*NLQR.S                    | 3 | 4.11 | 0.36 |       |
| IPI00783987 | Complement C3 precursor (Fragment)                   | K.AGDFLEANYMNLQR.S                     | 2 | 4.24 | 0.33 |       |
| IPI00783987 | Complement C3 precursor (Fragment)                   | K.AGDFLEANYMNLQR.S                     | 3 | 5.24 | 0.41 |       |
| IPI00783987 | Complement C3 precursor (Fragment)                   | K.AKDQLTCNK.F                          | 2 | 1.85 | 0.23 |       |
| IPI00783987 | Complement C3 precursor (Fragment)                   | K.AKDQLTCNKFDLK.V                      | 2 | 4.17 | 0.32 |       |
| IPI00783987 | Complement C3 precursor (Fragment)                   | K.DAPDHQELNLDVSLQLPSR.S                | 2 | 6.10 | 0.36 |       |
| IPI00783987 | Complement C3 precursor (Fragment)                   | K.DAPDHQELNLDVSLQLPSR.S                | 3 | 3.64 | 0.17 |       |
| IPI00783987 | Complement C3 precursor (Fragment)                   | K.DFDVPPVVR.W                          | 1 | 2.08 | 0.14 |       |
| IPI00783987 | Complement C3 precursor (Fragment)                   | K.DFDVPPVVR.W                          | 2 | 3.35 | 0.24 |       |
| IPI00783987 | Complement C3 precursor (Fragment)                   | K.DICEEQVNSLPGSITK.A                   | 2 | 5.31 | 0.40 |       |
| IPI00783987 | Complement C3 precursor (Fragment)                   | K.DICEEQVNSLPGSITK.A                   | 3 | 4.02 | 0.23 |       |
| IPI00783987 | Complement C3 precursor (Fragment)                   | K.DQLTCNKFDLK.V                        | 2 | 3.41 | 0.20 |       |
| IPI00783987 | Complement C3 precursor (Fragment)                   | K.DSCVGLVVK.S                          | 1 | 2.28 | 0.19 |       |
| IPI00783987 | Complement C3 precursor (Fragment)                   | K.DSCVGLVVK.S                          | 2 | 3.48 | 0.33 |       |
| IPI00783987 | Complement C3 precursor (Fragment)                   | K.DSITTWEILAVSM*SDK.K                  | 2 | 2.36 | 0.18 |       |
| IPI00783987 | Complement C3 precursor (Fragment)                   | K.DSITTWEILAVSM*SDKK.G                 | 2 | 3.96 | 0.41 |       |
| IPI00783987 | Complement C3 precursor (Fragment)                   | K.DTWVEHWPEEDECQDEENQK.Q               | 3 | 5.83 | 0.23 |       |
| IPI00783987 | Complement C3 precursor (Fragment)                   | K.DYAGVFSDAGLTFTSSSGQQAQR.A            | 2 | 6.65 | 0.61 |       |
| IPI00783987 | Complement C3 precursor (Fragment)                   | K.DYAGVFSDAGLTFTSSSGQQAQR.A            | 3 | 5.24 | 0.52 |       |
| IPI00783987 | Complement C3 precursor (Fragment)                   | K.EDIPPADLSDQVPDTESETR.I               | 2 | 5.20 | 0.45 |       |
| IPI00783987 | Complement C3 precursor (Fragment)                   | K.EDIPPADLSDQVPDTESETR.I               | 3 | 3.88 | 0.12 |       |
| IPI00783987 | Complement C3 precursor (Fragment)                   | K.ENEGLVTVTAEGK.G                      | 2 | 3.37 | 0.30 |       |
| IPI00783987 | Complement C3 precursor (Fragment)                   | K.EYVLPSFEVIVEPTEK.F                   | 1 | 4.74 | 0.34 |       |
| IPI00783987 | Complement C3 precursor (Fragment)                   | K.EYVLPSFEVIVEPTEK.F                   | 2 | 5.25 | 0.41 |       |
| IPI00783987 | Complement C3 precursor (Fragment)                   | K.FVTQATFGTQVVEK.V                     | 2 | 5.05 | 0.44 |       |

|             |                                    |                                           |   |      |      |       |
|-------------|------------------------------------|-------------------------------------------|---|------|------|-------|
| IPI00783987 | Complement C3 precursor (Fragment) | K.FVTVQATFGTQVVEK.V                       | 3 | 3.99 | 0.29 |       |
| IPI00783987 | Complement C3 precursor (Fragment) | K.FYYIYNEK.G                              | 2 | 3.18 | 0.16 |       |
| IPI00783987 | Complement C3 precursor (Fragment) | K.GLEVITITAR.F                            | 1 | 1.56 | 0.31 |       |
| IPI00783987 | Complement C3 precursor (Fragment) | K.GLEVITITAR.F                            | 2 | 2.49 | 0.20 |       |
| IPI00783987 | Complement C3 precursor (Fragment) | K.GQGTLSVVTM*YHAK.A                       | 2 | 3.76 | 0.39 |       |
| IPI00783987 | Complement C3 precursor (Fragment) | K.GVFVLNKK.N                              | 1 | 2.42 | 0.09 |       |
| IPI00783987 | Complement C3 precursor (Fragment) | K.GYTQQLAFR.Q                             | 1 | 2.25 | 0.06 |       |
| IPI00783987 | Complement C3 precursor (Fragment) | K.GYTQQLAFR.Q                             | 2 | 2.52 | 0.14 |       |
| IPI00783987 | Complement C3 precursor (Fragment) | K.GYTQQLAFRQPSSAFAAFVK.R                  | 2 | 4.59 | 0.35 |       |
| IPI00783987 | Complement C3 precursor (Fragment) | K.GYTQQLAFRQPSSAFAAFVKR.A                 | 3 | 6.10 | 0.40 |       |
| IPI00783987 | Complement C3 precursor (Fragment) | K.HLIVTPSGCGEQNM*IGM*TPTVIAVHYLDETEQWEK.F | 3 | 5.19 | 0.42 |       |
| IPI00783987 | Complement C3 precursor (Fragment) | K.IRYTYLIM*NK.G                           | 3 | 2.70 | 0.06 | -2.59 |
| IPI00783987 | Complement C3 precursor (Fragment) | K.IWDVVEK.A                               | 1 | 2.30 | 0.15 |       |
| IPI00783987 | Complement C3 precursor (Fragment) | K.KGYTQQLAFR.Q                            | 1 | 2.90 | 0.19 |       |
| IPI00783987 | Complement C3 precursor (Fragment) | K.KGYTQQLAFR.Q                            | 2 | 3.43 | 0.28 |       |
| IPI00783987 | Complement C3 precursor (Fragment) | K.KGYTQQLAFR.Q                            | 3 | 3.78 | 0.16 |       |
| IPI00783987 | Complement C3 precursor (Fragment) | K.KGYTQQLAFRQPSSAFAAFVK.R                 | 3 | 5.73 | 0.42 |       |
| IPI00783987 | Complement C3 precursor (Fragment) | K.KQELSEAEQATR.T                          | 2 | 3.81 | 0.15 |       |
| IPI00783987 | Complement C3 precursor (Fragment) | K.KQELSEAEQATR.T                          | 3 | 4.26 | 0.06 |       |
| IPI00783987 | Complement C3 precursor (Fragment) | K.KVEGTAFFVIFGIQDGEQR.I                   | 2 | 6.00 | 0.48 |       |
| IPI00783987 | Complement C3 precursor (Fragment) | K.KVEGTAFFVIFGIQDGEQR.I                   | 3 | 5.96 | 0.33 |       |
| IPI00783987 | Complement C3 precursor (Fragment) | K.KVFLDCCNYITELR.R                        | 2 | 4.83 | 0.45 |       |
| IPI00783987 | Complement C3 precursor (Fragment) | K.KVFLDCCNYITELR.R                        | 3 | 4.58 | 0.21 |       |
| IPI00783987 | Complement C3 precursor (Fragment) | K.KVFLDCCNYITELRR.Q                       | 3 | 3.40 | 0.26 |       |
| IPI00783987 | Complement C3 precursor (Fragment) | K.LCRDELRC.C                              | 2 | 3.01 | 0.11 |       |
| IPI00783987 | Complement C3 precursor (Fragment) | K.LMNIFLK.D                               | 2 | 2.26 | 0.12 |       |
| IPI00783987 | Complement C3 precursor (Fragment) | K.LSINTHPSQKPLSITVR.T                     | 2 | 4.23 | 0.37 |       |
| IPI00783987 | Complement C3 precursor (Fragment) | K.LSINTHPSQKPLSITVR.T                     | 3 | 3.50 | 0.34 | -4.68 |
| IPI00783987 | Complement C3 precursor (Fragment) | K.NTM*ILEICTR.Y                           | 2 | 4.00 | 0.24 |       |
| IPI00783987 | Complement C3 precursor (Fragment) | K.NTMILEICTR.Y                            | 2 | 3.51 | 0.29 |       |
| IPI00783987 | Complement C3 precursor (Fragment) | K.QKPDGVFQEDAPVIHQEM*IGGLR.N              | 2 | 2.66 | 0.37 |       |
| IPI00783987 | Complement C3 precursor (Fragment) | K.QKPDGVFQEDAPVIHQEM*IGGLR.N              | 3 | 3.25 | 0.25 |       |
| IPI00783987 | Complement C3 precursor (Fragment) | K.QKPDGVFQEDAPVIHQEMIGGLR.N               | 3 | 4.30 | 0.38 |       |
| IPI00783987 | Complement C3 precursor (Fragment) | K.QLYNVEATSYALLALLQLK.D                   | 2 | 6.00 | 0.45 |       |
| IPI00783987 | Complement C3 precursor (Fragment) | K.QLYNVEATSYALLALLQLK.D                   | 3 | 5.64 | 0.34 |       |
| IPI00783987 | Complement C3 precursor (Fragment) | K.QLYNVEATSYALLALLQLKDFVPPVVR.W           | 3 | 4.76 | 0.41 |       |
| IPI00783987 | Complement C3 precursor (Fragment) | K.RIPIEDGSGEVVLSR.K                       | 2 | 4.60 | 0.43 |       |
| IPI00783987 | Complement C3 precursor (Fragment) | K.RIPIEDGSGEVVLSR.K                       | 3 | 4.16 | 0.29 |       |
| IPI00783987 | Complement C3 precursor (Fragment) | K.RIPIEDGSGEVVLSRK.V                      | 2 | 3.82 | 0.29 |       |
| IPI00783987 | Complement C3 precursor (Fragment) | K.RIPIEDGSGEVVLSRK.V                      | 3 | 5.59 | 0.39 |       |
| IPI00783987 | Complement C3 precursor (Fragment) | K.SDDKVTLEER.L                            | 1 | 2.73 | 0.15 |       |
| IPI00783987 | Complement C3 precursor (Fragment) | K.SDDKVTLEER.L                            | 2 | 2.91 | 0.17 |       |

|             |                                    |                                      |   |      |      |       |
|-------------|------------------------------------|--------------------------------------|---|------|------|-------|
| IPI00783987 | Complement C3 precursor (Fragment) | K.SDDKVTLEERLDK.A                    | 2 | 3.17 | 0.16 |       |
| IPI00783987 | Complement C3 precursor (Fragment) | K.SDDKVTLEERLDK.A                    | 3 | 3.31 | 0.20 |       |
| IPI00783987 | Complement C3 precursor (Fragment) | K.SDDKVTLEERLDKACEPGVDYVYK.T         | 2 | 3.62 | 0.39 |       |
| IPI00783987 | Complement C3 precursor (Fragment) | K.SDDKVTLEERLDKACEPGVDYVYK.T         | 3 | 4.92 | 0.29 |       |
| IPI00783987 | Complement C3 precursor (Fragment) | K.SGQSEDRQPVPGQQM*TLK.I              | 2 | 3.46 | 0.34 |       |
| IPI00783987 | Complement C3 precursor (Fragment) | K.SGQSEDRQPVPGQQM*TLK.I              | 3 | 2.84 | 0.16 |       |
| IPI00783987 | Complement C3 precursor (Fragment) | K.SGQSEDRQPVPGQQM*TLKIEGDHGAR.V      | 3 | 3.70 | 0.25 |       |
| IPI00783987 | Complement C3 precursor (Fragment) | K.SGQSEDRQPVPGQQMTLK.I               | 2 | 5.34 | 0.35 |       |
| IPI00783987 | Complement C3 precursor (Fragment) | K.SGQSEDRQPVPGQQMTLK.I               | 3 | 3.06 | 0.21 |       |
| IPI00783987 | Complement C3 precursor (Fragment) | K.SGSDEVQVGQQR.T                     | 2 | 3.81 | 0.30 | -2.95 |
| IPI00783987 | Complement C3 precursor (Fragment) | K.SGSDEVQVGQQR.T                     | 3 | 3.24 | 0.14 |       |
| IPI00783987 | Complement C3 precursor (Fragment) | K.SLYVSATVILHSGSDM*VQAER.S           | 2 | 5.55 | 0.44 |       |
| IPI00783987 | Complement C3 precursor (Fragment) | K.SLYVSATVILHSGSDM*VQAER.S           | 3 | 5.16 | 0.47 |       |
| IPI00783987 | Complement C3 precursor (Fragment) | K.SSLVPHYVIVPLK.T                    | 1 | 2.22 | 0.10 |       |
| IPI00783987 | Complement C3 precursor (Fragment) | K.SSLVPHYVIVPLK.T                    | 2 | 2.87 | 0.27 | -3.91 |
| IPI00783987 | Complement C3 precursor (Fragment) | K.SSLVPHYVIVPLK.T                    | 3 | 3.62 | 0.22 |       |
| IPI00783987 | Complement C3 precursor (Fragment) | K.SSLVPHYVIVPLKTGLQEVEVK.A           | 2 | 3.68 | 0.22 |       |
| IPI00783987 | Complement C3 precursor (Fragment) | K.TGLQEVEVK.A                        | 1 | 1.98 | 0.16 |       |
| IPI00783987 | Complement C3 precursor (Fragment) | K.TIYTPGSTVLYR.I                     | 1 | 2.80 | 0.28 |       |
| IPI00783987 | Complement C3 precursor (Fragment) | K.TIYTPGSTVLYR.I                     | 2 | 3.17 | 0.31 |       |
| IPI00783987 | Complement C3 precursor (Fragment) | K.VEGTAFVIFGIQDGEQR.I                | 2 | 2.51 | 0.24 |       |
| IPI00783987 | Complement C3 precursor (Fragment) | K.VEGTAFVIFGIQDGEQR.I                | 3 | 6.00 | 0.22 |       |
| IPI00783987 | Complement C3 precursor (Fragment) | K.VFLDCCNYITELR.R                    | 1 | 2.72 | 0.23 |       |
| IPI00783987 | Complement C3 precursor (Fragment) | K.VFLDCCNYITELR.R                    | 2 | 3.62 | 0.26 |       |
| IPI00783987 | Complement C3 precursor (Fragment) | K.VFLDCCNYITELR.R                    | 3 | 3.69 | 0.19 |       |
| IPI00783987 | Complement C3 precursor (Fragment) | K.VFLDCCNYITELRR.Q                   | 2 | 2.63 | 0.10 |       |
| IPI00783987 | Complement C3 precursor (Fragment) | K.VHQYFNVELIQPGAVK.V                 | 2 | 3.98 | 0.36 | -5.51 |
| IPI00783987 | Complement C3 precursor (Fragment) | K.VLLDGVQNP.R.A                      | 1 | 2.04 | 0.27 |       |
| IPI00783987 | Complement C3 precursor (Fragment) | K.VLLDGVQNP.R.A                      | 2 | 3.72 | 0.36 |       |
| IPI00783987 | Complement C3 precursor (Fragment) | K.VQLSNDFDEYIM*AIEQTIK.S             | 2 | 5.58 | 0.53 | -4.53 |
| IPI00783987 | Complement C3 precursor (Fragment) | K.VQLSNDFDEYIM*AIEQTIK.S             | 3 | 4.59 | 0.35 | -5.18 |
| IPI00783987 | Complement C3 precursor (Fragment) | K.VQLSNDFDEYIM*AIEQTIKSGSDEVQVGQQR.T | 3 | 6.43 | 0.52 |       |
| IPI00783987 | Complement C3 precursor (Fragment) | K.VQLSNDFDEYIMAIEQTIK.S              | 2 | 6.23 | 0.43 |       |
| IPI00783987 | Complement C3 precursor (Fragment) | K.VQLSNDFDEYIMAIEQTIK.S              | 3 | 4.71 | 0.29 |       |
| IPI00783987 | Complement C3 precursor (Fragment) | K.VRVLLHNPFCSLATTK.R                 | 2 | 5.91 | 0.47 |       |
| IPI00783987 | Complement C3 precursor (Fragment) | K.VRVLLHNPFCSLATTK.R                 | 3 | 4.38 | 0.37 |       |
| IPI00783987 | Complement C3 precursor (Fragment) | K.VSHSEDDCLAFK.V                     | 1 | 3.60 | 0.35 |       |
| IPI00783987 | Complement C3 precursor (Fragment) | K.VSHSEDDCLAFK.V                     | 2 | 3.64 | 0.33 |       |
| IPI00783987 | Complement C3 precursor (Fragment) | K.VSHSEDDCLAFK.V                     | 3 | 5.05 | 0.28 |       |
| IPI00783987 | Complement C3 precursor (Fragment) | K.VTIKPAPETEK.R                      | 2 | 2.63 | 0.13 |       |
| IPI00783987 | Complement C3 precursor (Fragment) | K.VTIKPAPETEK.R                      | 3 | 3.01 | 0.19 |       |
| IPI00783987 | Complement C3 precursor (Fragment) | K.VTIKPAPETEKRPQDAK.N                | 2 | 4.08 | 0.36 |       |

|             |                                    |                                       |   |      |      |       |
|-------------|------------------------------------|---------------------------------------|---|------|------|-------|
| IPI00783987 | Complement C3 precursor (Fragment) | K.VTIKPAPETEKRPQDAK.N                 | 3 | 3.39 | 0.18 |       |
| IPI00783987 | Complement C3 precursor (Fragment) | K.VTIKPAPETEKRPQDAKNTM*ILEICTR.Y      | 3 | 3.80 | 0.15 |       |
| IPI00783987 | Complement C3 precursor (Fragment) | K.VVLVSLQSGYLFIQTDK.T                 | 2 | 3.67 | 0.32 |       |
| IPI00783987 | Complement C3 precursor (Fragment) | K.VYAYYNLEESCTR.F                     | 1 | 2.71 | 0.33 |       |
| IPI00783987 | Complement C3 precursor (Fragment) | K.VYAYYNLEESCTR.F                     | 2 | 5.09 | 0.45 |       |
| IPI00783987 | Complement C3 precursor (Fragment) | K.VYAYYNLEESCTR.F                     | 3 | 4.93 | 0.26 |       |
| IPI00783987 | Complement C3 precursor (Fragment) | K.YELDKAFSDR.N                        | 1 | 2.41 | 0.28 |       |
| IPI00783987 | Complement C3 precursor (Fragment) | K.YELDKAFSDR.N                        | 2 | 3.01 | 0.33 |       |
| IPI00783987 | Complement C3 precursor (Fragment) | K.YELDKAFSDR.N                        | 3 | 2.42 | 0.22 |       |
| IPI00783987 | Complement C3 precursor (Fragment) | K.YELDKAFSDRNTLIYLDK.V                | 3 | 4.68 | 0.26 |       |
| IPI00783987 | Complement C3 precursor (Fragment) | K.YFKPGM*PFDLM*VFVTNPDGSPAYR.V        | 2 | 4.40 | 0.43 |       |
| IPI00783987 | Complement C3 precursor (Fragment) | K.YFKPGM*PFDLM*VFVTNPDGSPAYR.V        | 3 | 3.62 | 0.26 | -4.95 |
| IPI00783987 | Complement C3 precursor (Fragment) | K.YFKPGM*PFDLMVFVTNPDGSPAYR.V         | 2 | 4.06 | 0.28 |       |
| IPI00783987 | Complement C3 precursor (Fragment) | K.YFKPGM*PFDLMVFVTNPDGSPAYR.V         | 3 | 4.79 | 0.14 |       |
| IPI00783987 | Complement C3 precursor (Fragment) | K.YFKPGMPFDLM*VFVTNPDGSPAYR.V         | 3 | 4.46 | 0.14 |       |
| IPI00783987 | Complement C3 precursor (Fragment) | P.GQDLVVLPLSITDFIPFR.L                | 2 | 5.64 | 0.45 |       |
| IPI00783987 | Complement C3 precursor (Fragment) | R.AELQCPQPAAR.R                       | 2 | 2.56 | 0.19 |       |
| IPI00783987 | Complement C3 precursor (Fragment) | R.APSTWLTAYVVK.V                      | 2 | 3.95 | 0.46 |       |
| IPI00783987 | Complement C3 precursor (Fragment) | R.ASHLGLAR.S                          | 2 | 2.24 | 0.19 |       |
| IPI00783987 | Complement C3 precursor (Fragment) | R.AVLYNYRQNQELK.V                     | 2 | 3.59 | 0.22 |       |
| IPI00783987 | Complement C3 precursor (Fragment) | R.AYYENSPQQVFSTEFVK.E                 | 2 | 5.38 | 0.43 |       |
| IPI00783987 | Complement C3 precursor (Fragment) | R.AYYENSPQQVFSTEFVK.E                 | 3 | 4.87 | 0.25 |       |
| IPI00783987 | Complement C3 precursor (Fragment) | R.AYYENSPQQVFSTEFVKEYVLPSEFVIVEPTEK.F | 3 | 5.20 | 0.37 |       |
| IPI00783987 | Complement C3 precursor (Fragment) | R.CAEENCFIQK.S                        | 1 | 3.26 | 0.29 |       |
| IPI00783987 | Complement C3 precursor (Fragment) | R.CAEENCFIQK.S                        | 2 | 3.81 | 0.29 |       |
| IPI00783987 | Complement C3 precursor (Fragment) | R.EALKLEEK.K                          | 1 | 2.61 | 0.06 |       |
| IPI00783987 | Complement C3 precursor (Fragment) | R.EGVQKEDIPPADLSDQVPDTESETR.I         | 2 | 4.64 | 0.43 |       |
| IPI00783987 | Complement C3 precursor (Fragment) | R.EGVQKEDIPPADLSDQVPDTESETR.I         | 3 | 4.35 | 0.37 | -2.71 |
| IPI00783987 | Complement C3 precursor (Fragment) | R.EPGQDLVVLPLSITDFIPFR.L              | 2 | 4.04 | 0.38 | -5.09 |
| IPI00783987 | Complement C3 precursor (Fragment) | R.EPGQDLVVLPLSITDFIPFR.L              | 3 | 3.31 | 0.40 | -1.55 |
| IPI00783987 | Complement C3 precursor (Fragment) | R.EVVADSVWVDVK.D                      | 1 | 2.73 | 0.24 |       |
| IPI00783987 | Complement C3 precursor (Fragment) | R.EVVADSVWVDVK.D                      | 2 | 4.47 | 0.32 |       |
| IPI00783987 | Complement C3 precursor (Fragment) | R.EVVADSVWVDVKDSCVGSLLVK.S            | 2 | 3.72 | 0.35 |       |
| IPI00783987 | Complement C3 precursor (Fragment) | R.EVVADSVWVDVKDSCVGSLLVK.S            | 3 | 4.30 | 0.45 |       |
| IPI00783987 | Complement C3 precursor (Fragment) | R.FISLGEACK.K                         | 1 | 1.80 | 0.16 |       |
| IPI00783987 | Complement C3 precursor (Fragment) | R.FISLGEACK.K                         | 2 | 2.78 | 0.17 |       |
| IPI00783987 | Complement C3 precursor (Fragment) | R.FLYGKKVEGTAFVIFGIQDGEQR.I           | 3 | 3.76 | 0.06 |       |
| IPI00783987 | Complement C3 precursor (Fragment) | R.FYHPEKEDGK.L                        | 2 | 2.79 | 0.15 |       |
| IPI00783987 | Complement C3 precursor (Fragment) | R.FYHPEKEDGKLNK.L                     | 2 | 3.08 | 0.09 |       |
| IPI00783987 | Complement C3 precursor (Fragment) | R.FYHPEKEDGKLNK.L                     | 3 | 3.53 | 0.21 |       |
| IPI00783987 | Complement C3 precursor (Fragment) | R.GDQDATM*SILDISM*M*MGFAPDTDDLK.Q     | 3 | 3.42 | 0.26 |       |
| IPI00783987 | Complement C3 precursor (Fragment) | R.HQQTVTIPPK.S                        | 2 | 2.97 | 0.32 |       |

|             |                                    |                                            |   |      |      |       |
|-------------|------------------------------------|--------------------------------------------|---|------|------|-------|
| IPI00783987 | Complement C3 precursor (Fragment) | R.HQQTVTIPPKSSLSVPPYVIVPLK.T               | 3 | 4.99 | 0.35 |       |
| IPI00783987 | Complement C3 precursor (Fragment) | R.HQQTVTIPPKSSLSVPPYVIVPLKTGLQEVEVK.A      | 3 | 5.02 | 0.40 |       |
| IPI00783987 | Complement C3 precursor (Fragment) | R.ILLQGTTPVAQM*TEDAVDAER.L                 | 2 | 5.03 | 0.54 | -3.69 |
| IPI00783987 | Complement C3 precursor (Fragment) | R.ILLQGTTPVAQM*TEDAVDAER.L                 | 3 | 6.24 | 0.51 |       |
| IPI00783987 | Complement C3 precursor (Fragment) | R.ILLQGTTPVAQM*TEDAVDAERLK.H               | 2 | 4.17 | 0.43 |       |
| IPI00783987 | Complement C3 precursor (Fragment) | R.ILLQGTTPVAQMTEDAVDAER.L                  | 2 | 4.49 | 0.49 |       |
| IPI00783987 | Complement C3 precursor (Fragment) | R.ILLQGTTPVAQMTEDAVDAER.L                  | 3 | 4.40 | 0.25 |       |
| IPI00783987 | Complement C3 precursor (Fragment) | R.IPIEDGSGEVVLSR.K                         | 1 | 3.13 | 0.38 |       |
| IPI00783987 | Complement C3 precursor (Fragment) | R.IPIEDGSGEVVLSR.K                         | 2 | 4.59 | 0.37 |       |
| IPI00783987 | Complement C3 precursor (Fragment) | R.IPIEDGSGEVVLSRK.V                        | 2 | 4.14 | 0.32 |       |
| IPI00783987 | Complement C3 precursor (Fragment) | R.IPIEDGSGEVVLSRK.V                        | 3 | 3.33 | 0.23 |       |
| IPI00783987 | Complement C3 precursor (Fragment) | R.KVLLDGVQNPR.A                            | 2 | 4.12 | 0.30 |       |
| IPI00783987 | Complement C3 precursor (Fragment) | R.KVLLDGVQNPR.A                            | 3 | 3.35 | 0.09 |       |
| IPI00783987 | Complement C3 precursor (Fragment) | R.LDKACEPGVDYVYK.T                         | 1 | 3.47 | 0.32 |       |
| IPI00783987 | Complement C3 precursor (Fragment) | R.LDKACEPGVDYVYK.T                         | 2 | 4.28 | 0.39 |       |
| IPI00783987 | Complement C3 precursor (Fragment) | R.LESEETM*VLEAHDAQGDVPVTVTVHDFPGK.K        | 2 | 4.28 | 0.36 |       |
| IPI00783987 | Complement C3 precursor (Fragment) | R.LESEETM*VLEAHDAQGDVPVTVTVHDFPGK.K        | 3 | 5.57 | 0.38 |       |
| IPI00783987 | Complement C3 precursor (Fragment) | R.LESEETM*VLEAHDAQGDVPVTVTVHDFPGKK.L       | 2 | 4.36 | 0.49 |       |
| IPI00783987 | Complement C3 precursor (Fragment) | R.LESEETM*VLEAHDAQGDVPVTVTVHDFPGKK.L       | 3 | 6.14 | 0.44 |       |
| IPI00783987 | Complement C3 precursor (Fragment) | R.LESEETMVLEAHDAQGDVPVTVTVHDFPGK.K         | 3 | 6.07 | 0.40 |       |
| IPI00783987 | Complement C3 precursor (Fragment) | R.LESEETMVLEAHDAQGDVPVTVTVHDFPGKK.L        | 2 | 3.80 | 0.32 |       |
| IPI00783987 | Complement C3 precursor (Fragment) | R.LESEETMVLEAHDAQGDVPVTVTVHDFPGKK.L        | 3 | 6.58 | 0.44 |       |
| IPI00783987 | Complement C3 precursor (Fragment) | R.LGREGVQKEDIPPADLSDQVPDTESETR.I           | 3 | 6.30 | 0.37 |       |
| IPI00783987 | Complement C3 precursor (Fragment) | R.LPYSVVRNEQVEIR.A                         | 3 | 2.74 | 0.20 |       |
| IPI00783987 | Complement C3 precursor (Fragment) | R.LVAYYTLIGASGQR.E                         | 1 | 3.03 | 0.24 |       |
| IPI00783987 | Complement C3 precursor (Fragment) | R.LVAYYTLIGASGQR.E                         | 2 | 4.74 | 0.41 |       |
| IPI00783987 | Complement C3 precursor (Fragment) | R.LVAYYTLIGASGQR.E                         | 3 | 4.52 | 0.24 |       |
| IPI00783987 | Complement C3 precursor (Fragment) | R.NKFVTVQATFGTQVVEK.V                      | 2 | 2.24 | 0.12 |       |
| IPI00783987 | Complement C3 precursor (Fragment) | R.NNNEKDM*ALTAFLVLSLQEAKDICEEQVNSLPGSITK.A | 3 | 6.33 | 0.49 |       |
| IPI00783987 | Complement C3 precursor (Fragment) | R.NNNEKDMALTAFLVLSLQEAK.D                  | 2 | 5.07 | 0.40 |       |
| IPI00783987 | Complement C3 precursor (Fragment) | R.NNNEKDMALTAFLVLSLQEAKDICEEQVNSLPGSITK.A  | 3 | 7.08 | 0.42 |       |
| IPI00783987 | Complement C3 precursor (Fragment) | R.NTLIYLDK.V                               | 1 | 2.50 | 0.06 |       |
| IPI00783987 | Complement C3 precursor (Fragment) | R.NTLIYLDK.V                               | 2 | 3.14 | 0.13 |       |
| IPI00783987 | Complement C3 precursor (Fragment) | R.NTLIYLDKVSHSEDDCLAFK.V                   | 2 | 5.47 | 0.40 |       |
| IPI00783987 | Complement C3 precursor (Fragment) | R.NTLIYLDKVSHSEDDCLAFK.V                   | 3 | 5.15 | 0.30 |       |
| IPI00783987 | Complement C3 precursor (Fragment) | R.QPSSAFAAFVK.R                            | 1 | 1.87 | 0.20 |       |
| IPI00783987 | Complement C3 precursor (Fragment) | R.QPSSAFAAFVK.R                            | 2 | 1.88 | 0.20 |       |
| IPI00783987 | Complement C3 precursor (Fragment) | R.QVREPGQDLVVLPLSITTFIPSF.R.L              | 2 | 3.79 | 0.39 |       |
| IPI00783987 | Complement C3 precursor (Fragment) | R.QVREPGQDLVVLPLSITTFIPSF.R.L              | 3 | 4.04 | 0.46 | -4.68 |
| IPI00783987 | Complement C3 precursor (Fragment) | R.SEETKENEGFTVTAEGK.G                      | 1 | 4.42 | 0.41 |       |
| IPI00783987 | Complement C3 precursor (Fragment) | R.SEETKENEGFTVTAEGK.G                      | 2 | 5.08 | 0.38 |       |
| IPI00783987 | Complement C3 precursor (Fragment) | R.SEETKENEGFTVTAEGK.G                      | 3 | 4.57 | 0.34 |       |

|             |                                    |                                             |   |      |      |       |
|-------------|------------------------------------|---------------------------------------------|---|------|------|-------|
| IPI00783987 | Complement C3 precursor (Fragment) | R.SEFPEWLWNVEDLKEPPK.N                      | 3 | 2.27 | 0.16 |       |
| IPI00783987 | Complement C3 precursor (Fragment) | R.SEFPEWLWNVEDLKEPPKNGISTK.L                | 2 | 3.82 | 0.31 |       |
| IPI00783987 | Complement C3 precursor (Fragment) | R.SEFPEWLWNVEDLKEPPKNGISTK.L                | 3 | 4.59 | 0.26 |       |
| IPI00783987 | Complement C3 precursor (Fragment) | R.SGIPIVTSPYQIHFTK.T                        | 1 | 4.18 | 0.28 |       |
| IPI00783987 | Complement C3 precursor (Fragment) | R.SGIPIVTSPYQIHFTK.T                        | 2 | 4.04 | 0.44 | -4.70 |
| IPI00783987 | Complement C3 precursor (Fragment) | R.SNLDEDIIAEENIVSR.S                        | 1 | 3.39 | 0.29 |       |
| IPI00783987 | Complement C3 precursor (Fragment) | R.SNLDEDIIAEENIVSR.S                        | 2 | 4.91 | 0.42 | -4.53 |
| IPI00783987 | Complement C3 precursor (Fragment) | R.SNLDEDIIAEENIVSR.S                        | 3 | 4.88 | 0.30 |       |
| IPI00783987 | Complement C3 precursor (Fragment) | R.SVQLTEKR.M                                | 1 | 2.08 | 0.09 |       |
| IPI00783987 | Complement C3 precursor (Fragment) | R.SYTVAIAGYALAQM*GR.L                       | 2 | 4.91 | 0.42 |       |
| IPI00783987 | Complement C3 precursor (Fragment) | R.TELRPGETLNVNFLLR.M                        | 2 | 3.36 | 0.29 |       |
| IPI00783987 | Complement C3 precursor (Fragment) | R.TELRPGETLNVNFLLR.M                        | 3 | 5.49 | 0.35 |       |
| IPI00783987 | Complement C3 precursor (Fragment) | R.TKKQELSEAEQATR.T                          | 2 | 4.44 | 0.36 |       |
| IPI00783987 | Complement C3 precursor (Fragment) | R.TKKQELSEAEQATR.T                          | 3 | 5.19 | 0.30 |       |
| IPI00783987 | Complement C3 precursor (Fragment) | R.TM*QALPYSTVGNSNNYLHLSVLR.T                | 2 | 5.04 | 0.39 |       |
| IPI00783987 | Complement C3 precursor (Fragment) | R.TM*QALPYSTVGNSNNYLHLSVLR.T                | 3 | 3.79 | 0.30 |       |
| IPI00783987 | Complement C3 precursor (Fragment) | R.TRFISLGEACK.K                             | 2 | 2.94 | 0.27 |       |
| IPI00783987 | Complement C3 precursor (Fragment) | R.TVM*VNIENPEGIPVK.Q                        | 2 | 3.76 | 0.27 |       |
| IPI00783987 | Complement C3 precursor (Fragment) | R.VELLHNPAFCSLATTK.R                        | 2 | 4.68 | 0.43 |       |
| IPI00783987 | Complement C3 precursor (Fragment) | R.VELLHNPAFCSLATTK.R                        | 3 | 4.55 | 0.34 |       |
| IPI00783987 | Complement C3 precursor (Fragment) | R.VPVAVQGEDTVQSLTQGDGVAK.L                  | 2 | 6.12 | 0.59 |       |
| IPI00783987 | Complement C3 precursor (Fragment) | R.VPVAVQGEDTVQSLTQGDGVAK.L                  | 3 | 4.47 | 0.39 | -4.36 |
| IPI00783987 | Complement C3 precursor (Fragment) | R.VVLVAVDK.G                                | 1 | 2.35 | 0.15 |       |
| IPI00783987 | Complement C3 precursor (Fragment) | R.VVLVAVDK.G                                | 2 | 2.99 | 0.11 |       |
| IPI00783987 | Complement C3 precursor (Fragment) | R.VVLVAVDKGVFVLNK.K                         | 2 | 3.29 | 0.27 |       |
| IPI00783987 | Complement C3 precursor (Fragment) | R.VVLVAVDKGVFVLNK.K                         | 3 | 3.69 | 0.42 |       |
| IPI00783987 | Complement C3 precursor (Fragment) | R.VVLVAVDKGVFVLNKK.N                        | 2 | 4.68 | 0.46 |       |
| IPI00783987 | Complement C3 precursor (Fragment) | R.VVLVAVDKGVFVLNKK.N                        | 3 | 3.54 | 0.41 |       |
| IPI00783987 | Complement C3 precursor (Fragment) | R.WEDPGKQLYNVEATSYALLALLQLKDFDFVPPVVR.W     | 3 | 3.79 | 0.10 |       |
| IPI00783987 | Complement C3 precursor (Fragment) | R.YISKYELDK.A                               | 2 | 2.20 | 0.19 |       |
| IPI00783987 | Complement C3 precursor (Fragment) | R.YISKYELDKAFSDR.N                          | 2 | 4.62 | 0.42 |       |
| IPI00783987 | Complement C3 precursor (Fragment) | R.YRGDQDATM*SILDISM*M*TGFAPDTDDLK.Q         | 3 | 6.69 | 0.44 |       |
| IPI00783987 | Complement C3 precursor (Fragment) | R.YRGDQDATM*SILDISM*M*TGFAPDTDDLKQLANGVDR.Y | 3 | 5.68 | 0.48 |       |
| IPI00783987 | Complement C3 precursor (Fragment) | R.YRGDQDATM*SILDISM*M*TGFAPDTDDLK.Q         | 3 | 4.27 | 0.10 |       |
| IPI00783987 | Complement C3 precursor (Fragment) | R.YYGGGYGSTQATFM*VFQALAQYQK.D               | 2 | 2.71 | 0.19 |       |
| IPI00783987 | Complement C3 precursor (Fragment) | R.YYGGGYGSTQATFM*VFQALAQYQK.D               | 3 | 4.54 | 0.30 | -4.49 |
| IPI00783987 | Complement C3 precursor (Fragment) | R.YYGGGYGSTQATFM*VFQALAQYQK.D               | 3 | 3.33 | 0.13 |       |
| IPI00783987 | Complement C3 precursor (Fragment) | R.YYTYLIM*NK.G                              | 1 | 3.31 | 0.17 |       |
| IPI00783987 | Complement C3 precursor (Fragment) | R.YYTYLIM*NK.G                              | 2 | 3.10 | 0.28 |       |
| IPI00783987 | Complement C3 precursor (Fragment) | R.YYTYLIMNK.G                               | 1 | 2.62 | 0.07 |       |
| IPI00783987 | Complement C3 precursor (Fragment) | R.YYTYLIMNK.G                               | 2 | 3.23 | 0.35 |       |

|             |                                                                                  |                                             |   |      |      |       |
|-------------|----------------------------------------------------------------------------------|---------------------------------------------|---|------|------|-------|
| IPI00784044 | Isoform 1 of Methylcrotonoyl-CoA carboxylase beta chain, mitochondrial precursor | R.EGKQFSSADEAALK.E                          | 1 | 2.30 | 0.08 |       |
| IPI00784119 | Vacuolar ATP synthase subunit S1 precursor                                       | K.LGASPLHVDLATLR.E                          | 2 | 4.07 | 0.46 | -3.11 |
| IPI00784119 | Vacuolar ATP synthase subunit S1 precursor                                       | K.LGASPLHVDLATLR.E                          | 3 | 4.12 | 0.43 | -2.13 |
| IPI00784119 | Vacuolar ATP synthase subunit S1 precursor                                       | K.LSIEDFTAYGGVFGNK.Q                        | 2 | 5.36 | 0.55 | -3.54 |
| IPI00784119 | Vacuolar ATP synthase subunit S1 precursor                                       | K.SEDVPYTAALTAVRPSR.V                       | 2 | 2.03 | 0.07 | -1.70 |
| IPI00784119 | Vacuolar ATP synthase subunit S1 precursor                                       | L.TGNDEVIGQVLSTLK.S                         | 2 | 3.60 | 0.27 | -3.50 |
| IPI00784119 | Vacuolar ATP synthase subunit S1 precursor                                       | R.EVLTGNDEVIGQVLSTLK.S                      | 2 | 5.15 | 0.48 | -4.68 |
| IPI00784119 | Vacuolar ATP synthase subunit S1 precursor                                       | R.EVLTGNDEVIGQVLSTLK.S                      | 3 | 5.01 | 0.38 | -4.31 |
| IPI00784119 | Vacuolar ATP synthase subunit S1 precursor                                       | R.EVLTGNDEVIGQVLSTLKSEDVPYTAALTAVRPSR.V     | 3 | 4.34 | 0.50 | -2.59 |
| IPI00784119 | Vacuolar ATP synthase subunit S1 precursor                                       | R.EVLTGNDEVIGQVLSTLKSEDVPYTAALTAVRPSR.V     | 4 | 3.20 | 0.32 | -4.18 |
| IPI00784119 | Vacuolar ATP synthase subunit S1 precursor                                       | R.LPYTASSGLM*APR.E                          | 2 | 4.43 | 0.54 | -3.63 |
| IPI00784119 | Vacuolar ATP synthase subunit S1 precursor                                       | R.LPYTASSGLM*APR.E                          | 3 | 3.35 | 0.25 | -2.77 |
| IPI00784119 | Vacuolar ATP synthase subunit S1 precursor                                       | R.NVLLFLQDK.L                               | 2 | 2.99 | 0.28 | -3.11 |
| IPI00784154 | 60 kDa heat shock protein, mitochondrial precursor                               | R.ALM*LQGVDLLADAVAVTM*GPK.G                 | 3 | 4.58 | 0.43 | -5.14 |
| IPI00784154 | 60 kDa heat shock protein, mitochondrial precursor                               | R.ALM*LQGVDLLADAVAVTMGPK.G                  | 3 | 3.67 | 0.35 | -3.34 |
| IPI00784154 | 60 kDa heat shock protein, mitochondrial precursor                               | R.ALMLQGVDLLADAVAVTMGPK.G                   | 2 | 3.40 | 0.27 | -2.05 |
| IPI00784154 | 60 kDa heat shock protein, mitochondrial precursor                               | R.ALMLQGVDLLADAVAVTMGPK.G                   | 3 | 5.18 | 0.49 | -1.42 |
| IPI00784154 | 60 kDa heat shock protein, mitochondrial precursor                               | R.KPLVIIAEDVDGEALSTLVLR.L                   | 3 | 2.55 | 0.15 | -3.35 |
| IPI00784156 | Isoform 1 of AP-2 complex subunit beta-1                                         | K.ALQHM*TDFAIQFNK.N                         | 2 | 4.30 | 0.37 | -3.93 |
| IPI00784156 | Isoform 1 of AP-2 complex subunit beta-1                                         | K.ALQHM*TDFAIQFNK.N                         | 3 | 3.01 | 0.23 | -1.42 |
| IPI00784156 | Isoform 1 of AP-2 complex subunit beta-1                                         | K.DIPNENELQFQIK.E                           | 2 | 3.51 | 0.28 | -4.29 |
| IPI00784156 | Isoform 1 of AP-2 complex subunit beta-1                                         | K.LQNNNVYTIKR.R                             | 2 | 3.16 | 0.36 | -2.66 |
| IPI00784156 | Isoform 1 of AP-2 complex subunit beta-1                                         | K.LQNNNVYTIKR.N                             | 2 | 3.62 | 0.31 | -2.44 |
| IPI00784156 | Isoform 1 of AP-2 complex subunit beta-1                                         | K.LQNNNVYTIKR.N                             | 3 | 2.09 | 0.19 | -3.23 |
| IPI00784156 | Isoform 1 of AP-2 complex subunit beta-1                                         | K.M*EPLNNLQVAVK.N                           | 2 | 3.13 | 0.30 | -3.02 |
| IPI00784156 | Isoform 1 of AP-2 complex subunit beta-1                                         | K.NSFGVIPSTPLAIHTPLM*PNQSIDVSLPLNLTGPVM*K.M | 3 | 5.53 | 0.56 | -3.81 |
| IPI00784156 | Isoform 1 of AP-2 complex subunit beta-1                                         | K.NSFGVIPSTPLAIHTPLM*PNQSIDVSLPLNLTGPVM*K.M | 4 | 4.13 | 0.31 | -4.33 |
| IPI00784156 | Isoform 1 of AP-2 complex subunit beta-1                                         | K.RNVEGQDM*LYQSLK.L                         | 3 | 2.64 | 0.29 | -1.14 |
| IPI00784156 | Isoform 1 of AP-2 complex subunit beta-1                                         | R.APEVSQYIYQVYDSILKN.-                      | 2 | 5.82 | 0.55 | -1.73 |
| IPI00784156 | Isoform 1 of AP-2 complex subunit beta-1                                         | R.APEVSQYIYQVYDSILKN.-                      | 3 | 3.99 | 0.25 | -2.33 |
| IPI00784156 | Isoform 1 of AP-2 complex subunit beta-1                                         | R.IQPGPNPYTSLK.C                            | 2 | 2.18 | 0.21 | -2.96 |
| IPI00784156 | Isoform 1 of AP-2 complex subunit beta-1                                         | R.NVEGQDM*LYQSLK.L                          | 2 | 3.99 | 0.46 | -3.71 |
| IPI00784258 | latent transforming growth factor beta binding protein 1 isoform LTBP-1L         | K.LYQHSQQPGK.A                              | 2 | 2.55 | 0.22 | -2.31 |
| IPI00784258 | latent transforming growth factor beta binding protein 1 isoform LTBP-1L         | K.TKEAQPQGSQVSYQGLPVQK.T                    | 3 | 2.98 | 0.25 | -4.28 |



|             |                                                                              |                                    |   |      |      |       |
|-------------|------------------------------------------------------------------------------|------------------------------------|---|------|------|-------|
| IPI00784258 | latent transforming growth factor beta binding protein 1 isoform LTBP-1L     | R.DALVDFSEQYTPEADPYFIQDR.F         | 3 | 4.86 | 0.40 | -1.72 |
| IPI00784258 | latent transforming growth factor beta binding protein 1 isoform LTBP-1L     | R.SKVPQETQSGGGS.R.L                | 3 | 2.44 | 0.19 | 0.11  |
| IPI00784258 | latent transforming growth factor beta binding protein 1 isoform LTBP-1L     | R.VQEGYTCDCFDGYHLDTAK.M            | 2 | 5.28 | 0.59 | -2.80 |
| IPI00784258 | latent transforming growth factor beta binding protein 1 isoform LTBP-1L     | R.VQEGYTCDCFDGYHLDTAK.M            | 3 | 3.24 | 0.51 | -1.85 |
| IPI00784258 | latent transforming growth factor beta binding protein 1 isoform LTBP-1L     | R.YTCICYEGYR.F                     | 2 | 2.92 | 0.38 | -2.19 |
| IPI00784368 | Isoform 1 of Bifunctional heparan sulfate N-deacetylase/N-sulfotransferase 1 | K.LLIIGPQK.T                       | 2 | 2.66 | 0.08 | -1.83 |
| IPI00784368 | Isoform 1 of Bifunctional heparan sulfate N-deacetylase/N-sulfotransferase 1 | K.VM*DM*VQK.F                      | 2 | 2.53 | 0.09 | -3.10 |
| IPI00784368 | Isoform 1 of Bifunctional heparan sulfate N-deacetylase/N-sulfotransferase 1 | Q.VTSTEEYPHLKPAR.Y                 | 2 | 3.63 | 0.33 | -4.30 |
| IPI00784430 | Similar to Ig kappa chain V-III region VG precursor                          | G.EIVLTQSPATLSLSPGER.A             | 2 | 5.23 | 0.35 |       |
| IPI00784430 | Similar to Ig kappa chain V-III region VG precursor                          | R.ASQSVSSYLAWYQQKPGQAPR.L          | 2 | 4.92 | 0.37 |       |
| IPI00784430 | Similar to Ig kappa chain V-III region VG precursor                          | R.ASQSVSSYLAWYQQKPGQAPR.L          | 3 | 4.06 | 0.51 |       |
| IPI00784430 | Similar to Ig kappa chain V-III region VG precursor                          | R.FSGSGGTDFTLTISLSEPEDFAVYYCQQR.S  | 3 | 5.31 | 0.44 |       |
| IPI00784430 | Similar to Ig kappa chain V-III region VG precursor                          | R.LLIYDASNR.A                      | 1 | 2.24 | 0.07 |       |
| IPI00784430 | Similar to Ig kappa chain V-III region VG precursor                          | R.LLIYDASNR.A                      | 2 | 3.50 | 0.32 |       |
| IPI00784519 | Putative uncharacterized protein                                             | K.AAPSVTLFPPSSEELQANK.A            | 1 | 4.04 | 0.50 |       |
| IPI00784519 | Putative uncharacterized protein                                             | K.AAPSVTLFPPSSEELQANK.A            | 2 | 3.15 | 0.34 | -1.50 |
| IPI00784519 | Putative uncharacterized protein                                             | K.AAPSVTLFPPSSEELQANK.A            | 3 | 3.32 | 0.13 |       |
| IPI00784519 | Putative uncharacterized protein                                             | K.ADSSPVKAGVETTTPSK.Q              | 1 | 3.85 | 0.37 |       |
| IPI00784519 | Putative uncharacterized protein                                             | K.ADSSPVKAGVETTTPSK.Q              | 2 | 3.50 | 0.38 |       |
| IPI00784519 | Putative uncharacterized protein                                             | K.ADSSPVKAGVETTTPSK.Q              | 3 | 3.46 | 0.35 |       |
| IPI00784519 | Putative uncharacterized protein                                             | K.ADSSPVKAGVETTTPSKQSNNK.Y         | 2 | 5.35 | 0.42 |       |
| IPI00784519 | Putative uncharacterized protein                                             | K.ADSSPVKAGVETTTPSKQSNNK.Y         | 3 | 4.61 | 0.23 |       |
| IPI00784519 | Putative uncharacterized protein                                             | K.AGVETTTPSK.Q                     | 2 | 2.62 | 0.09 | -3.23 |
| IPI00784519 | Putative uncharacterized protein                                             | K.AGVETTTPSKQSNNK.Y                | 2 | 4.14 | 0.32 |       |
| IPI00784519 | Putative uncharacterized protein                                             | K.AGVETTTPSKQSNNKYAASSYLSLTPEQWK.S | 3 | 5.47 | 0.40 |       |
| IPI00784519 | Putative uncharacterized protein                                             | K.ATLVCLISDFYPGAVTVAWK.A           | 2 | 5.07 | 0.50 |       |
| IPI00784519 | Putative uncharacterized protein                                             | K.ATLVCLISDFYPGAVTVAWK.A           | 3 | 3.53 | 0.31 | -3.63 |
| IPI00784519 | Putative uncharacterized protein                                             | K.ATLVCLISDFYPGAVTVAWKADSSPVK.A    | 3 | 3.81 | 0.20 |       |
| IPI00784519 | Putative uncharacterized protein                                             | K.LTVLRQPK.A                       | 2 | 2.21 | 0.12 |       |
| IPI00784519 | Putative uncharacterized protein                                             | K.QSNNKYAASSYLSLTPEQWK.S           | 2 | 5.38 | 0.37 |       |
| IPI00784519 | Putative uncharacterized protein                                             | K.QSNNKYAASSYLSLTPEQWK.S           | 3 | 4.26 | 0.33 |       |
| IPI00784519 | Putative uncharacterized protein                                             | K.YAASSYLSLTPEQWK.S                | 1 | 3.49 | 0.43 |       |
| IPI00784519 | Putative uncharacterized protein                                             | K.YAASSYLSLTPEQWK.S                | 2 | 5.52 | 0.47 |       |
| IPI00784519 | Putative uncharacterized protein                                             | K.YAASSYLSLTPEQWK.S                | 3 | 3.44 | 0.22 |       |

|             |                                                 |                                                  |   |      |      |       |
|-------------|-------------------------------------------------|--------------------------------------------------|---|------|------|-------|
| IPI00784519 | Putative uncharacterized protein                | R.SYSCQVTHEGSTVEK.T                              | 1 | 3.84 | 0.43 |       |
| IPI00784519 | Putative uncharacterized protein                | R.SYSCQVTHEGSTVEK.T                              | 2 | 3.17 | 0.41 | -4.10 |
| IPI00784519 | Putative uncharacterized protein                | R.SYSCQVTHEGSTVEKTVAPTECS.-                      | 2 | 5.35 | 0.45 |       |
| IPI00784519 | Putative uncharacterized protein                | R.SYSCQVTHEGSTVEKTVAPTECS.-                      | 3 | 2.78 | 0.26 |       |
| IPI00784739 | Uncharacterized protein C14orf43                | R.EREAPAM*GSEEGM*R.A                             | 2 | 1.44 | 0.10 | -8.91 |
| IPI00784758 | Putative uncharacterized protein DKFZp686M08189 | K.GDTFSCMVGHEALPLAFTQK.T                         | 2 | 4.19 | 0.19 |       |
| IPI00784758 | Putative uncharacterized protein DKFZp686M08189 | K.HYTNPQDVTVPCVPPPPPCCHPR.L                      | 3 | 5.66 | 0.35 |       |
| IPI00784758 | Putative uncharacterized protein DKFZp686M08189 | K.KGDTFSCM*VGHEALPLAFTQK.T                       | 2 | 4.91 | 0.41 |       |
| IPI00784758 | Putative uncharacterized protein DKFZp686M08189 | K.KGDTFSCM*VGHEALPLAFTQK.T                       | 3 | 3.90 | 0.44 | -2.10 |
| IPI00784758 | Putative uncharacterized protein DKFZp686M08189 | K.SAVQGPPER.D                                    | 2 | 2.30 | 0.12 | 0.79  |
| IPI00784758 | Putative uncharacterized protein DKFZp686M08189 | K.SAVQGPPERDLCGCYSVSSVLPGCAQPWNHGETFTCTAAHPELK.T | 3 | 3.92 | 0.18 |       |
| IPI00784758 | Putative uncharacterized protein DKFZp686M08189 | K.SGNTFRPEVHLLPPPSEELALNELVTLTCLAR.G             | 2 | 4.32 | 0.41 |       |
| IPI00784758 | Putative uncharacterized protein DKFZp686M08189 | K.SGNTFRPEVHLLPPPSEELALNELVTLTCLAR.G             | 3 | 6.86 | 0.60 |       |
| IPI00784758 | Putative uncharacterized protein DKFZp686M08189 | K.SSLYLQMNSLR.A                                  | 2 | 2.37 | 0.18 |       |
| IPI00784758 | Putative uncharacterized protein DKFZp686M08189 | K.YLTWASR.Q                                      | 1 | 1.98 | 0.18 |       |
| IPI00784758 | Putative uncharacterized protein DKFZp686M08189 | K.YLTWASR.Q                                      | 2 | 1.93 | 0.24 |       |
| IPI00784758 | Putative uncharacterized protein DKFZp686M08189 | Q.EPSQGTTFVAVTSILR.V                             | 2 | 3.82 | 0.43 | -5.84 |
| IPI00784758 | Putative uncharacterized protein DKFZp686M08189 | R.DASGATFTWTPSSGK.S                              | 2 | 4.55 | 0.44 |       |
| IPI00784758 | Putative uncharacterized protein DKFZp686M08189 | R.DLCGCYSVSSVLPGCAQPWNHGETFTCTAAHPELK.T          | 3 | 5.72 | 0.26 |       |
| IPI00784758 | Putative uncharacterized protein DKFZp686M08189 | R.DNAKSSLYLQM*NSLR.A                             | 3 | 3.20 | 0.10 |       |
| IPI00784758 | Putative uncharacterized protein DKFZp686M08189 | R.EKYLTWASR.Q                                    | 1 | 2.49 | 0.27 |       |
| IPI00784758 | Putative uncharacterized protein DKFZp686M08189 | R.GFSPKDVLR.W                                    | 2 | 2.81 | 0.13 |       |
| IPI00784758 | Putative uncharacterized protein DKFZp686M08189 | R.QEPSQGTTFVAVTSILR.V                            | 2 | 4.27 | 0.52 |       |

|             |                                                 |                                          |   |      |      |       |
|-------------|-------------------------------------------------|------------------------------------------|---|------|------|-------|
| IPI00784758 | Putative uncharacterized protein DKFZp686M08189 | R.QEPSQGTTFVAVTSILR.V                    | 3 | 4.05 | 0.27 |       |
| IPI00784758 | Putative uncharacterized protein DKFZp686M08189 | R.VAAEDWK.K                              | 2 | 2.23 | 0.16 |       |
| IPI00784758 | Putative uncharacterized protein DKFZp686M08189 | R.WLQGSQELPR.E                           | 1 | 3.00 | 0.19 |       |
| IPI00784758 | Putative uncharacterized protein DKFZp686M08189 | R.WLQGSQELPR.E                           | 2 | 3.80 | 0.33 |       |
| IPI00784758 | Putative uncharacterized protein DKFZp686M08189 | R.WLQGSQELPREK.Y                         | 2 | 2.71 | 0.15 |       |
| IPI00784773 | Putative uncharacterized protein                | C.DIQM*TQSPSSLSASVGDVTITCR.A             | 2 | 5.30 | 0.51 |       |
| IPI00784773 | Putative uncharacterized protein                | K.ADYEKHKVYACEVTHQGLSSPVTK.S             | 3 | 6.20 | 0.45 |       |
| IPI00784773 | Putative uncharacterized protein                | K.DSTYLSSTLTLSK.A                        | 1 | 3.19 | 0.31 |       |
| IPI00784773 | Putative uncharacterized protein                | K.DSTYLSSTLTLSK.A                        | 2 | 2.59 | 0.17 | -2.80 |
| IPI00784773 | Putative uncharacterized protein                | K.DSTYLSSTLTLSK.A                        | 3 | 3.23 | 0.27 |       |
| IPI00784773 | Putative uncharacterized protein                | K.HKVYACEVTHQGLSSPVTK.S                  | 3 | 4.56 | 0.36 |       |
| IPI00784773 | Putative uncharacterized protein                | K.RTVAAPSVFIFPPSDEQLK.S                  | 2 | 5.74 | 0.42 |       |
| IPI00784773 | Putative uncharacterized protein                | K.RTVAAPSVFIFPPSDEQLK.S                  | 3 | 4.14 | 0.22 |       |
| IPI00784773 | Putative uncharacterized protein                | K.SGTASVVCLLNNFYPR.E                     | 1 | 4.08 | 0.39 |       |
| IPI00784773 | Putative uncharacterized protein                | K.SGTASVVCLLNNFYPR.E                     | 2 | 3.05 | 0.36 | -5.56 |
| IPI00784773 | Putative uncharacterized protein                | K.SGTASVVCLLNNFYPR.E                     | 3 | 4.63 | 0.31 |       |
| IPI00784773 | Putative uncharacterized protein                | K.VDNALQSGNSQESVTEQDSK.D                 | 2 | 5.40 | 0.58 | -3.51 |
| IPI00784773 | Putative uncharacterized protein                | K.VDNALQSGNSQESVTEQDSK.D                 | 3 | 4.56 | 0.42 | -2.63 |
| IPI00784773 | Putative uncharacterized protein                | K.VDNALQSGNSQESVTEQDSKDYLSSTLTLSK.A      | 2 | 3.56 | 0.49 |       |
| IPI00784773 | Putative uncharacterized protein                | K.VDNALQSGNSQESVTEQDSKDYLSSTLTLSK.A      | 3 | 6.26 | 0.51 |       |
| IPI00784773 | Putative uncharacterized protein                | K.VDNALQSGNSQESVTEQDSKDYLSSTLTLSKADYEK.H | 3 | 4.65 | 0.36 |       |
| IPI00784773 | Putative uncharacterized protein                | K.VQWKVDNALQSGNSQESVTEQDSK.D             | 2 | 5.17 | 0.41 |       |
| IPI00784773 | Putative uncharacterized protein                | K.VQWKVDNALQSGNSQESVTEQDSK.D             | 3 | 6.42 | 0.38 |       |
| IPI00784773 | Putative uncharacterized protein                | K.VQWKVDNALQSGNSQESVTEQDSKDYLSSTLTLSK.A  | 3 | 5.65 | 0.43 |       |
| IPI00784773 | Putative uncharacterized protein                | K.VYACEVTHQGLSSPVTK.S                    | 1 | 4.33 | 0.48 |       |
| IPI00784773 | Putative uncharacterized protein                | K.VYACEVTHQGLSSPVTK.S                    | 2 | 5.40 | 0.48 |       |
| IPI00784773 | Putative uncharacterized protein                | K.VYACEVTHQGLSSPVTK.S                    | 3 | 4.16 | 0.44 |       |
| IPI00784773 | Putative uncharacterized protein                | Q.SGNSQESVTEQDSKDYLSSTLTLSK.A            | 3 | 6.25 | 0.52 |       |
| IPI00784773 | Putative uncharacterized protein                | R.TVAAPSVF.-                             | 1 | 1.75 | 0.12 |       |
| IPI00784773 | Putative uncharacterized protein                | R.TVAAPSVFIFPPSDEQLK.S                   | 1 | 3.65 | 0.48 |       |
| IPI00784773 | Putative uncharacterized protein                | R.TVAAPSVFIFPPSDEQLK.S                   | 2 | 4.89 | 0.48 |       |
| IPI00784773 | Putative uncharacterized protein                | R.TVAAPSVFIFPPSDEQLK.S                   | 3 | 4.07 | 0.25 |       |
| IPI00784773 | Putative uncharacterized protein                | R.TVAAPSVFIFPPSDEQLKSGTASVVCLLNNFYPR.E   | 3 | 5.23 | 0.48 |       |
| IPI00784773 | Putative uncharacterized protein                | V.YACEVTHQGLSSPVTK.S                     | 2 | 5.14 | 0.43 |       |
| IPI00784807 | Putative uncharacterized protein                | C.PPCPAPPVAGPSVFLFPPKPK.D                | 3 | 6.61 | 0.48 |       |
| IPI00784807 | Putative uncharacterized protein                | K.CCVECPCPAPPVAGPSVFLFPPKPK.D            | 2 | 4.27 | 0.44 |       |
| IPI00784807 | Putative uncharacterized protein                | K.CCVECPCPAPPVAGPSVFLFPPKPK.D            | 3 | 5.21 | 0.49 |       |

|             |                                  |                                              |   |      |      |       |
|-------------|----------------------------------|----------------------------------------------|---|------|------|-------|
| IPI00784807 | Putative uncharacterized protein | K.CCVECPCPAPPVAGPSVFLFPPKPKDTLM*ISR.T        | 3 | 4.29 | 0.43 |       |
| IPI00784807 | Putative uncharacterized protein | K.CKVSNGKGLPAIEK.T                           | 3 | 2.67 | 0.22 |       |
| IPI00784807 | Putative uncharacterized protein | K.DTLM*ISR.T                                 | 2 | 2.48 | 0.09 | -3.74 |
| IPI00784807 | Putative uncharacterized protein | K.DTLMISR.T                                  | 1 | 2.38 | 0.13 |       |
| IPI00784807 | Putative uncharacterized protein | K.DTLMISR.T                                  | 2 | 2.45 | 0.16 |       |
| IPI00784807 | Putative uncharacterized protein | K.FNWYVDGVEVHNAK.T                           | 1 | 3.93 | 0.41 |       |
| IPI00784807 | Putative uncharacterized protein | K.FNWYVDGVEVHNAK.T                           | 2 | 5.51 | 0.51 |       |
| IPI00784807 | Putative uncharacterized protein | K.FNWYVDGVEVHNAK.T                           | 3 | 3.99 | 0.38 |       |
| IPI00784807 | Putative uncharacterized protein | K.GFYPSDIAVEWESNGQPENNYNTTPPM*LSDSGSFFLYSK.L | 3 | 3.88 | 0.12 |       |
| IPI00784807 | Putative uncharacterized protein | K.GLEWVANIK.Z                                | 1 | 2.05 | 0.11 |       |
| IPI00784807 | Putative uncharacterized protein | K.GLEWVANIK.Z                                | 2 | 3.69 | 0.25 |       |
| IPI00784807 | Putative uncharacterized protein | K.GPSVFPLAPCSR.S                             | 1 | 2.54 | 0.34 |       |
| IPI00784807 | Putative uncharacterized protein | K.GPSVFPLAPCSR.S                             | 2 | 3.53 | 0.37 |       |
| IPI00784807 | Putative uncharacterized protein | K.GPSVFPLAPCSRSTSESTAALGCLVK.D               | 2 | 3.65 | 0.35 |       |
| IPI00784807 | Putative uncharacterized protein | K.GQPREPQVYTLPPSR.E                          | 2 | 2.89 | 0.13 |       |
| IPI00784807 | Putative uncharacterized protein | K.GQPREPQVYTLPPSR.E                          | 3 | 2.92 | 0.17 |       |
| IPI00784807 | Putative uncharacterized protein | K.GQPREPQVYTLPPSREEM*TK.N                    | 3 | 3.87 | 0.30 |       |
| IPI00784807 | Putative uncharacterized protein | K.GQPREPQVYTLPPSREEM*TKNQVSLTCLVK.G          | 3 | 3.18 | 0.26 |       |
| IPI00784807 | Putative uncharacterized protein | K.GQPREPQVYTLPPSREEMTK.N                     | 3 | 3.97 | 0.17 |       |
| IPI00784807 | Putative uncharacterized protein | K.NQVSLTCLVK.G                               | 1 | 2.26 | 0.22 |       |
| IPI00784807 | Putative uncharacterized protein | K.NQVSLTCLVK.G                               | 2 | 2.44 | 0.28 | -2.15 |
| IPI00784807 | Putative uncharacterized protein | K.NTLYLQMNSLR.A                              | 1 | 3.28 | 0.09 |       |
| IPI00784807 | Putative uncharacterized protein | K.NTLYLQMNSLR.A                              | 2 | 4.45 | 0.07 |       |
| IPI00784807 | Putative uncharacterized protein | K.TKGQPREPQVYTLPPSREEM*TK.N                  | 3 | 3.08 | 0.11 |       |
| IPI00784807 | Putative uncharacterized protein | K.VSNKGLPAIEK.T                              | 1 | 2.10 | 0.15 |       |
| IPI00784807 | Putative uncharacterized protein | K.VSNKGLPAIEK.T                              | 2 | 3.30 | 0.19 |       |
| IPI00784807 | Putative uncharacterized protein | K.WYVDGVEVHNAK.T                             | 1 | 2.91 | 0.35 |       |
| IPI00784807 | Putative uncharacterized protein | K.WYVDGVEVHNAK.T                             | 2 | 3.90 | 0.46 |       |
| IPI00784807 | Putative uncharacterized protein | K.WYVDGVEVHNAK.T                             | 3 | 2.99 | 0.21 |       |
| IPI00784807 | Putative uncharacterized protein | R.EEM*TKNQVSLTCLVK.G                         | 2 | 3.75 | 0.32 |       |
| IPI00784807 | Putative uncharacterized protein | R.EPQVYTLPPSREEM*TK.N                        | 1 | 2.26 | 0.37 |       |
| IPI00784807 | Putative uncharacterized protein | R.EPQVYTLPPSREEM*TK.N                        | 2 | 4.02 | 0.44 |       |
| IPI00784807 | Putative uncharacterized protein | R.EPQVYTLPPSREEM*TKNQVSLTCLVK.G              | 3 | 2.94 | 0.15 |       |
| IPI00784807 | Putative uncharacterized protein | R.EPQVYTLPPSREEMTK.N                         | 1 | 2.97 | 0.15 |       |
| IPI00784807 | Putative uncharacterized protein | R.EPQVYTLPPSREEMTK.N                         | 2 | 3.92 | 0.38 |       |
| IPI00784807 | Putative uncharacterized protein | R.EPQVYTLPPSREEMTKNQVSLTCLVK.G               | 3 | 3.59 | 0.25 |       |
| IPI00784807 | Putative uncharacterized protein | R.KCCVECPCPAPPVAGPSVFLFPPKPK.D               | 2 | 3.33 | 0.41 |       |
| IPI00784807 | Putative uncharacterized protein | R.KCCVECPCPAPPVAGPSVFLFPPKPK.D               | 3 | 5.71 | 0.46 |       |
| IPI00784807 | Putative uncharacterized protein | R.KCCVECPCPAPPVAGPSVFLFPPKPKDTLM*ISR.T       | 3 | 4.57 | 0.37 |       |
| IPI00784807 | Putative uncharacterized protein | R.STSESTAALGCLVK.D                           | 1 | 2.94 | 0.40 |       |
| IPI00784807 | Putative uncharacterized protein | R.STSESTAALGCLVK.D                           | 2 | 4.70 | 0.44 |       |
| IPI00784807 | Putative uncharacterized protein | R.STSESTAALGCLVK.D                           | 3 | 3.43 | 0.20 |       |

|             |                                  |                                             |   |      |      |       |
|-------------|----------------------------------|---------------------------------------------|---|------|------|-------|
| IPI00784807 | Putative uncharacterized protein | R.TPEVTCVVVDVSHED.P                         | 2 | 5.50 | 0.52 |       |
| IPI00784807 | Putative uncharacterized protein | R.VEDTAM*YYCAR.E                            | 2 | 3.83 | 0.19 |       |
| IPI00784807 | Putative uncharacterized protein | R.VEDTAMYYCAR.E                             | 2 | 2.28 | 0.12 |       |
| IPI00784807 | Putative uncharacterized protein | R.VVSVLTVVHQDWLNGK.E                        | 1 | 4.17 | 0.39 |       |
| IPI00784807 | Putative uncharacterized protein | R.VVSVLTVVHQDWLNGK.E                        | 2 | 5.13 | 0.46 |       |
| IPI00784807 | Putative uncharacterized protein | R.VVSVLTVVHQDWLNGK.E                        | 3 | 3.17 | 0.25 |       |
| IPI00784807 | Putative uncharacterized protein | R.VVSVLTVVHQDWLNGKEYK.C                     | 2 | 5.56 | 0.47 |       |
| IPI00784807 | Putative uncharacterized protein | R.VVSVLTVVHQDWLNGKEYK.C                     | 3 | 4.44 | 0.35 |       |
| IPI00784807 | Putative uncharacterized protein | V.SVLTVVHQDWLNGKEYK.C                       | 2 | 5.09 | 0.35 |       |
| IPI00784810 | IGHV4-31 protein                 | C.DKHTCPCPAPELLGGPSVFLFPPKPK.D              | 3 | 6.55 | 0.38 |       |
| IPI00784810 | IGHV4-31 protein                 | K.ALPAPIEK.T                                | 1 | 1.81 | 0.11 |       |
| IPI00784810 | IGHV4-31 protein                 | K.CKVSNKALPAPIEK.T                          | 2 | 2.28 | 0.15 |       |
| IPI00784810 | IGHV4-31 protein                 | K.DSLYLQM*NSLR.V                            | 2 | 3.78 | 0.22 |       |
| IPI00784810 | IGHV4-31 protein                 | K.DTLM*ISR.T                                | 2 | 2.48 | 0.09 | -3.74 |
| IPI00784810 | IGHV4-31 protein                 | K.DTLMISR.T                                 | 1 | 2.38 | 0.13 |       |
| IPI00784810 | IGHV4-31 protein                 | K.DTLMISR.T                                 | 2 | 2.45 | 0.16 |       |
| IPI00784810 | IGHV4-31 protein                 | K.FNWWYVDGVEVHNAK.T                         | 1 | 3.93 | 0.41 |       |
| IPI00784810 | IGHV4-31 protein                 | K.FNWWYVDGVEVHNAK.T                         | 2 | 5.51 | 0.51 |       |
| IPI00784810 | IGHV4-31 protein                 | K.FNWWYVDGVEVHNAK.T                         | 3 | 3.99 | 0.38 |       |
| IPI00784810 | IGHV4-31 protein                 | K.GFYPSDIAVEWESNGQPENNYK.T                  | 2 | 4.88 | 0.31 |       |
| IPI00784810 | IGHV4-31 protein                 | K.GFYPSDIAVEWESNGQPENNYK.T                  | 3 | 4.56 | 0.26 |       |
| IPI00784810 | IGHV4-31 protein                 | K.GFYPSDIAVEWESNGQPENNYKTTTPVLDSGDSFFLYSK.L | 3 | 4.64 | 0.25 |       |
| IPI00784810 | IGHV4-31 protein                 | K.GPSVFPLAPSSK.S                            | 1 | 3.15 | 0.35 |       |
| IPI00784810 | IGHV4-31 protein                 | K.GPSVFPLAPSSK.S                            | 2 | 3.30 | 0.36 |       |
| IPI00784810 | IGHV4-31 protein                 | K.GPSVFPLAPSSKSTSGGTAALGCLVK.D              | 2 | 4.62 | 0.48 |       |
| IPI00784810 | IGHV4-31 protein                 | K.GPSVFPLAPSSKSTSGGTAALGCLVK.D              | 3 | 4.18 | 0.48 |       |
| IPI00784810 | IGHV4-31 protein                 | K.GQPREPQVYTLPPSR.E                         | 2 | 2.89 | 0.13 |       |
| IPI00784810 | IGHV4-31 protein                 | K.GQPREPQVYTLPPSR.E                         | 3 | 2.92 | 0.17 |       |
| IPI00784810 | IGHV4-31 protein                 | K.GQPREPQVYTLPPSRDELTK.N                    | 3 | 4.51 | 0.32 |       |
| IPI00784810 | IGHV4-31 protein                 | K.NQVSLTCLVK.G                              | 1 | 2.26 | 0.22 |       |
| IPI00784810 | IGHV4-31 protein                 | K.NQVSLTCLVK.G                              | 2 | 2.44 | 0.28 | -2.15 |
| IPI00784810 | IGHV4-31 protein                 | K.SCDKHTCPCPAPELLGGPSVFLFPPKPK.D            | 3 | 6.71 | 0.47 |       |
| IPI00784810 | IGHV4-31 protein                 | K.THTCPCPAPELLGGPSVFLFPPKPK.D               | 2 | 3.81 | 0.39 |       |
| IPI00784810 | IGHV4-31 protein                 | K.THTCPCPAPELLGGPSVFLFPPKPK.D               | 3 | 6.29 | 0.52 |       |
| IPI00784810 | IGHV4-31 protein                 | K.TKPREEQYNSTYR.V                           | 2 | 2.99 | 0.10 |       |
| IPI00784810 | IGHV4-31 protein                 | K.TTPPVLDSDGSFFLYSK.L                       | 1 | 3.22 | 0.41 |       |
| IPI00784810 | IGHV4-31 protein                 | K.TTPPVLDSDGSFFLYSK.L                       | 2 | 3.42 | 0.37 |       |
| IPI00784810 | IGHV4-31 protein                 | K.TTPPVLDSDGSFFLYSK.L                       | 3 | 4.11 | 0.39 |       |
| IPI00784810 | IGHV4-31 protein                 | K.VSNKALPAPIEK.T                            | 2 | 3.33 | 0.18 |       |
| IPI00784810 | IGHV4-31 protein                 | K.WYVDGVEVHNAK.T                            | 1 | 2.91 | 0.35 |       |
| IPI00784810 | IGHV4-31 protein                 | K.WYVDGVEVHNAK.T                            | 2 | 3.90 | 0.46 |       |
| IPI00784810 | IGHV4-31 protein                 | K.WYVDGVEVHNAK.T                            | 3 | 2.99 | 0.21 |       |

|             |                                                 |                                            |   |      |      |       |
|-------------|-------------------------------------------------|--------------------------------------------|---|------|------|-------|
| IPI00784810 | IGHV4-31 protein                                | R.CPAPELLGGPSVFLFPPKPK.D                   | 2 | 4.00 | 0.37 |       |
| IPI00784810 | IGHV4-31 protein                                | R.CPAPELLGGPSVFLFPPKPK.D                   | 3 | 6.31 | 0.49 |       |
| IPI00784810 | IGHV4-31 protein                                | R.CPAPELLGGPSVFLFPPKPKDTLM*ISR.T           | 3 | 3.77 | 0.23 |       |
| IPI00784810 | IGHV4-31 protein                                | R.EPQVYTLPPSRDELTK.N                       | 2 | 3.97 | 0.21 |       |
| IPI00784810 | IGHV4-31 protein                                | R.EPQVYTLPPSRDELTKNQVSLTCLVK.G             | 3 | 4.03 | 0.23 |       |
| IPI00784810 | IGHV4-31 protein                                | R.FTISRENAK.D                              | 2 | 2.23 | 0.18 |       |
| IPI00784810 | IGHV4-31 protein                                | R.STSGGTAALGCLVK.D                         | 1 | 2.45 | 0.34 |       |
| IPI00784810 | IGHV4-31 protein                                | R.STSGGTAALGCLVK.D                         | 2 | 4.37 | 0.45 |       |
| IPI00784810 | IGHV4-31 protein                                | R.TPEVTCVVVDVSHED.P                        | 2 | 5.50 | 0.52 |       |
| IPI00784810 | IGHV4-31 protein                                | R.VVSVLTVLHQDWLNGK.E                       | 1 | 4.22 | 0.41 |       |
| IPI00784810 | IGHV4-31 protein                                | R.VVSVLTVLHQDWLNGK.E                       | 2 | 5.39 | 0.46 |       |
| IPI00784810 | IGHV4-31 protein                                | R.VVSVLTVLHQDWLNGK.E                       | 3 | 3.42 | 0.38 |       |
| IPI00784810 | IGHV4-31 protein                                | R.VVSVLTVLHQDWLNGKEYK.C                    | 2 | 5.56 | 0.40 |       |
| IPI00784810 | IGHV4-31 protein                                | R.VVSVLTVLHQDWLNGKEYK.C                    | 3 | 4.97 | 0.40 |       |
| IPI00784828 | Putative uncharacterized protein DKFZp686C11235 | C.DKHTCPCPAPELLGGPSVFLFPPKPK.D             | 3 | 6.55 | 0.38 |       |
| IPI00784828 | Putative uncharacterized protein DKFZp686C11235 | K.ALPAPIEK.T                               | 1 | 1.81 | 0.11 |       |
| IPI00784828 | Putative uncharacterized protein DKFZp686C11235 | K.CKVSINKALPAPIEK.T                        | 2 | 2.28 | 0.15 |       |
| IPI00784828 | Putative uncharacterized protein DKFZp686C11235 | K.DTLM*ISR.T                               | 2 | 2.48 | 0.09 | -3.74 |
| IPI00784828 | Putative uncharacterized protein DKFZp686C11235 | K.DTLMISR.T                                | 1 | 2.38 | 0.13 |       |
| IPI00784828 | Putative uncharacterized protein DKFZp686C11235 | K.DTLMISR.T                                | 2 | 2.45 | 0.16 |       |
| IPI00784828 | Putative uncharacterized protein DKFZp686C11235 | K.FNWWYVDGVEVHNAK.T                        | 1 | 3.93 | 0.41 |       |
| IPI00784828 | Putative uncharacterized protein DKFZp686C11235 | K.FNWWYVDGVEVHNAK.T                        | 2 | 5.51 | 0.51 |       |
| IPI00784828 | Putative uncharacterized protein DKFZp686C11235 | K.FNWWYVDGVEVHNAK.T                        | 3 | 3.99 | 0.38 |       |
| IPI00784828 | Putative uncharacterized protein DKFZp686C11235 | K.GFYPSDIAVEWESNGQPENNYK.T                 | 2 | 4.88 | 0.31 |       |
| IPI00784828 | Putative uncharacterized protein DKFZp686C11235 | K.GFYPSDIAVEWESNGQPENNYK.T                 | 3 | 4.56 | 0.26 |       |
| IPI00784828 | Putative uncharacterized protein DKFZp686C11235 | K.GFYPSDIAVEWESNGQPENNYKTPPVLDSDGSFFLYSK.L | 3 | 4.64 | 0.25 |       |
| IPI00784828 | Putative uncharacterized protein DKFZp686C11235 | K.GPSVFPLAPSSK.S                           | 1 | 3.15 | 0.35 |       |
| IPI00784828 | Putative uncharacterized protein DKFZp686C11235 | K.GPSVFPLAPSSK.S                           | 2 | 3.30 | 0.36 |       |

|             |                                                 |                                     |   |      |      |       |
|-------------|-------------------------------------------------|-------------------------------------|---|------|------|-------|
| IPI00784828 | Putative uncharacterized protein DKFZp686C11235 | K.GPSVFPLAPSSKSTSGGTAALGCLVK.D      | 2 | 4.62 | 0.48 |       |
| IPI00784828 | Putative uncharacterized protein DKFZp686C11235 | K.GPSVFPLAPSSKSTSGGTAALGCLVK.D      | 3 | 4.18 | 0.48 |       |
| IPI00784828 | Putative uncharacterized protein DKFZp686C11235 | K.GQPREPQVYTLPPSR.E                 | 2 | 2.89 | 0.13 |       |
| IPI00784828 | Putative uncharacterized protein DKFZp686C11235 | K.GQPREPQVYTLPPSR.E                 | 3 | 2.92 | 0.17 |       |
| IPI00784828 | Putative uncharacterized protein DKFZp686C11235 | K.GQPREPQVYTLPPSREEM*TK.N           | 3 | 3.87 | 0.30 |       |
| IPI00784828 | Putative uncharacterized protein DKFZp686C11235 | K.GQPREPQVYTLPPSREEM*TKNQVSLTCLVK.G | 3 | 3.18 | 0.26 |       |
| IPI00784828 | Putative uncharacterized protein DKFZp686C11235 | K.GQPREPQVYTLPPSREEMTK.N            | 3 | 3.97 | 0.17 |       |
| IPI00784828 | Putative uncharacterized protein DKFZp686C11235 | K.NQVSLTCLVK.G                      | 1 | 2.26 | 0.22 |       |
| IPI00784828 | Putative uncharacterized protein DKFZp686C11235 | K.NQVSLTCLVK.G                      | 2 | 2.44 | 0.28 | -2.15 |
| IPI00784828 | Putative uncharacterized protein DKFZp686C11235 | K.NSLYLQM*NSLR.A                    | 2 | 3.76 | 0.14 |       |
| IPI00784828 | Putative uncharacterized protein DKFZp686C11235 | K.NSLYLQMNSLR.A                     | 1 | 3.55 | 0.11 |       |
| IPI00784828 | Putative uncharacterized protein DKFZp686C11235 | K.NSLYLQMNSLR.A                     | 2 | 4.01 | 0.17 |       |
| IPI00784828 | Putative uncharacterized protein DKFZp686C11235 | K.SCDKTHTCPAPPELLGGPSVFLFPPKPK.D    | 3 | 6.71 | 0.47 |       |
| IPI00784828 | Putative uncharacterized protein DKFZp686C11235 | K.THTCPPCPAPPELLGGPSVFLFPPKPK.D     | 2 | 3.81 | 0.39 |       |
| IPI00784828 | Putative uncharacterized protein DKFZp686C11235 | K.THTCPPCPAPPELLGGPSVFLFPPKPK.D     | 3 | 6.29 | 0.52 |       |
| IPI00784828 | Putative uncharacterized protein DKFZp686C11235 | K.TKPREEQYNSTYR.V                   | 2 | 2.99 | 0.10 |       |
| IPI00784828 | Putative uncharacterized protein DKFZp686C11235 | K.TTPPVLDSDGSFFLYSK.L               | 1 | 3.22 | 0.41 |       |
| IPI00784828 | Putative uncharacterized protein DKFZp686C11235 | K.TTPPVLDSDGSFFLYSK.L               | 2 | 3.42 | 0.37 |       |
| IPI00784828 | Putative uncharacterized protein DKFZp686C11235 | K.TTPPVLDSDGSFFLYSK.L               | 3 | 4.11 | 0.39 |       |
| IPI00784828 | Putative uncharacterized protein DKFZp686C11235 | K.VSNKALPAPIEK.T                    | 2 | 3.33 | 0.18 |       |
| IPI00784828 | Putative uncharacterized protein DKFZp686C11235 | K.WYVDGVEVHNAK.T                    | 1 | 2.91 | 0.35 |       |

|             |                                                                                        |                                  |   |      |      |  |
|-------------|----------------------------------------------------------------------------------------|----------------------------------|---|------|------|--|
| IPI00784828 | Putative uncharacterized protein DKFZp686C11235                                        | K.WYVDGVEVHNAK.T                 | 2 | 3.90 | 0.46 |  |
| IPI00784828 | Putative uncharacterized protein DKFZp686C11235                                        | K.WYVDGVEVHNAK.T                 | 3 | 2.99 | 0.21 |  |
| IPI00784828 | Putative uncharacterized protein DKFZp686C11235                                        | R.CPAPELLGGPSVFLFPPKPK.D         | 2 | 4.00 | 0.37 |  |
| IPI00784828 | Putative uncharacterized protein DKFZp686C11235                                        | R.CPAPELLGGPSVFLFPPKPK.D         | 3 | 6.31 | 0.49 |  |
| IPI00784828 | Putative uncharacterized protein DKFZp686C11235                                        | R.CPAPELLGGPSVFLFPPKPKDTLM*ISR.T | 3 | 3.77 | 0.23 |  |
| IPI00784828 | Putative uncharacterized protein DKFZp686C11235                                        | R.EEM*TKNQVSLTCLVK.G             | 2 | 3.75 | 0.32 |  |
| IPI00784828 | Putative uncharacterized protein DKFZp686C11235                                        | R.EPQVYTLPPSREEM*TK.N            | 1 | 2.26 | 0.37 |  |
| IPI00784828 | Putative uncharacterized protein DKFZp686C11235                                        | R.EPQVYTLPPSREEM*TK.N            | 2 | 4.02 | 0.44 |  |
| IPI00784828 | Putative uncharacterized protein DKFZp686C11235                                        | R.EPQVYTLPPSREEM*TKNQVSLTCLVK.G  | 3 | 2.94 | 0.15 |  |
| IPI00784828 | Putative uncharacterized protein DKFZp686C11235                                        | R.EPQVYTLPPSREEMTK.N             | 1 | 2.97 | 0.15 |  |
| IPI00784828 | Putative uncharacterized protein DKFZp686C11235                                        | R.EPQVYTLPPSREEMTK.N             | 2 | 3.92 | 0.38 |  |
| IPI00784828 | Putative uncharacterized protein DKFZp686C11235                                        | R.EPQVYTLPPSREEMTKNQVSLTCLVK.G   | 3 | 3.59 | 0.25 |  |
| IPI00784828 | Putative uncharacterized protein DKFZp686C11235                                        | R.STSGGTAALGCLVK.D               | 1 | 2.45 | 0.34 |  |
| IPI00784828 | Putative uncharacterized protein DKFZp686C11235                                        | R.STSGGTAALGCLVK.D               | 2 | 4.37 | 0.45 |  |
| IPI00784828 | Putative uncharacterized protein DKFZp686C11235                                        | R.TPEVTCVVVDVSHED.P              | 2 | 5.50 | 0.52 |  |
| IPI00784828 | Putative uncharacterized protein DKFZp686C11235                                        | R.VVSVLTVLHQDWLNGK.E             | 1 | 4.22 | 0.41 |  |
| IPI00784828 | Putative uncharacterized protein DKFZp686C11235                                        | R.VVSVLTVLHQDWLNGK.E             | 2 | 5.39 | 0.46 |  |
| IPI00784828 | Putative uncharacterized protein DKFZp686C11235                                        | R.VVSVLTVLHQDWLNGK.E             | 3 | 3.42 | 0.38 |  |
| IPI00784828 | Putative uncharacterized protein DKFZp686C11235                                        | R.VVSVLTVLHQDWLNGKEYK.C          | 2 | 5.56 | 0.40 |  |
| IPI00784828 | Putative uncharacterized protein DKFZp686C11235                                        | R.VVSVLTVLHQDWLNGKEYK.C          | 3 | 4.97 | 0.40 |  |
| IPI00784830 | CDNA FLJ41981 fis, clone SMINT2011888, highly similar to Protein Tro alpha 1 H,myeloma | C.EAQVVESGGGLVQPGGSLR.L          | 2 | 4.93 | 0.36 |  |



|             |                                                                                       |                                                  |   |      |      |       |
|-------------|---------------------------------------------------------------------------------------|--------------------------------------------------|---|------|------|-------|
| IPI00784830 | CDNA FLJ41981 fis, clone SMINT2011888, highly similar to Protein Tro alpha1 H,myeloma | K.GDTFSCMVGHEALPLAFTQK.T                         | 2 | 4.19 | 0.19 |       |
| IPI00784830 | CDNA FLJ41981 fis, clone SMINT2011888, highly similar to Protein Tro alpha1 H,myeloma | K.HYTNPQDVTVPCPVPPPPCCHPR.L                      | 3 | 5.66 | 0.35 |       |
| IPI00784830 | CDNA FLJ41981 fis, clone SMINT2011888, highly similar to Protein Tro alpha1 H,myeloma | K.KGDTFSCM*VGHEALPLAFTQK.T                       | 2 | 4.91 | 0.41 |       |
| IPI00784830 | CDNA FLJ41981 fis, clone SMINT2011888, highly similar to Protein Tro alpha1 H,myeloma | K.KGDTFSCM*VGHEALPLAFTQK.T                       | 3 | 3.90 | 0.44 | -2.10 |
| IPI00784830 | CDNA FLJ41981 fis, clone SMINT2011888, highly similar to Protein Tro alpha1 H,myeloma | K.SAVQGPPER.D                                    | 2 | 2.30 | 0.12 | 0.79  |
| IPI00784830 | CDNA FLJ41981 fis, clone SMINT2011888, highly similar to Protein Tro alpha1 H,myeloma | K.SAVQGPPERDLCGCYSVSSVLPGCAQPWNHGETFTCTAAHPELK.T | 3 | 3.92 | 0.18 |       |
| IPI00784830 | CDNA FLJ41981 fis, clone SMINT2011888, highly similar to Protein Tro alpha1 H,myeloma | K.SGNTFRPEVHLLPPPSEELALNELVTLTCLAR.G             | 2 | 4.32 | 0.41 |       |
| IPI00784830 | CDNA FLJ41981 fis, clone SMINT2011888, highly similar to Protein Tro alpha1 H,myeloma | K.SGNTFRPEVHLLPPPSEELALNELVTLTCLAR.G             | 3 | 6.86 | 0.60 |       |
| IPI00784830 | CDNA FLJ41981 fis, clone SMINT2011888, highly similar to Protein Tro alpha1 H,myeloma | K.YLTWASR.Q                                      | 1 | 1.98 | 0.18 |       |
| IPI00784830 | CDNA FLJ41981 fis, clone SMINT2011888, highly similar to Protein Tro alpha1 H,myeloma | K.YLTWASR.Q                                      | 2 | 1.93 | 0.24 |       |
| IPI00784830 | CDNA FLJ41981 fis, clone SMINT2011888, highly similar to Protein Tro alpha1 H,myeloma | Q.EPSQGTTFFAVTSILR.V                             | 2 | 3.82 | 0.43 | -5.84 |
| IPI00784830 | CDNA FLJ41981 fis, clone SMINT2011888, highly similar to Protein Tro alpha1 H,myeloma | R.DASGATFTWTPSSGK.S                              | 2 | 4.55 | 0.44 |       |
| IPI00784830 | CDNA FLJ41981 fis, clone SMINT2011888, highly similar to Protein Tro alpha1 H,myeloma | R.DLCGCYSVSSVLPGCAQPWNHGETFTCTAAHPELK.T          | 3 | 5.72 | 0.26 |       |
| IPI00784830 | CDNA FLJ41981 fis, clone SMINT2011888, highly similar to Protein Tro alpha1 H,myeloma | R.EKYLWASR.Q                                     | 1 | 2.49 | 0.27 |       |
| IPI00784830 | CDNA FLJ41981 fis, clone SMINT2011888, highly similar to Protein Tro alpha1 H,myeloma | R.GFSPKDVLR.W                                    | 2 | 2.81 | 0.13 |       |
| IPI00784830 | CDNA FLJ41981 fis, clone SMINT2011888, highly similar to Protein Tro alpha1 H,myeloma | R.NFPPSQDASGDLYTTSSQLTLPATQCPDGK.S               | 2 | 3.66 | 0.39 |       |
| IPI00784830 | CDNA FLJ41981 fis, clone SMINT2011888, highly similar to Protein Tro alpha1 H,myeloma | R.NFPPSQDASGDLYTTSSQLTLPATQCPDGK.S               | 3 | 5.98 | 0.54 |       |
| IPI00784830 | CDNA FLJ41981 fis, clone SMINT2011888, highly similar to Protein Tro alpha1 H,myeloma | R.QEPSQGTTFFAVTSILR.V                            | 2 | 4.27 | 0.52 |       |
| IPI00784830 | CDNA FLJ41981 fis, clone SMINT2011888, highly similar to Protein Tro alpha1 H,myeloma | R.QEPSQGTTFFAVTSILR.V                            | 3 | 4.05 | 0.27 |       |
| IPI00784830 | CDNA FLJ41981 fis, clone SMINT2011888, highly similar to Protein Tro alpha1 H,myeloma | R.VAAEDWK.K                                      | 2 | 2.23 | 0.16 |       |
| IPI00784830 | CDNA FLJ41981 fis, clone SMINT2011888, highly similar to Protein Tro alpha1 H,myeloma | R.WLQGSQELPR.E                                   | 1 | 3.00 | 0.19 |       |

|             |                                                                                       |                                            |   |      |      |       |
|-------------|---------------------------------------------------------------------------------------|--------------------------------------------|---|------|------|-------|
| IPI00784830 | CDNA FLJ41981 fis, clone SMINT2011888, highly similar to Protein Tro alpha1 H,myeloma | R.WLQGSQELPR.E                             | 2 | 3.80 | 0.33 |       |
| IPI00784830 | CDNA FLJ41981 fis, clone SMINT2011888, highly similar to Protein Tro alpha1 H,myeloma | R.WLQGSQELPREK.Y                           | 2 | 2.71 | 0.15 |       |
| IPI00784842 | Putative uncharacterized protein DKFZp686G11190                                       | C.DKTHTCPAPPELLGGPSVFLFPPKPK.D             | 3 | 6.55 | 0.38 |       |
| IPI00784842 | Putative uncharacterized protein DKFZp686G11190                                       | C.EVQLLESGGGLVQPGGSLR.L                    | 1 | 4.02 | 0.09 |       |
| IPI00784842 | Putative uncharacterized protein DKFZp686G11190                                       | C.EVQLLESGGGLVQPGGSLR.L                    | 2 | 5.62 | 0.07 |       |
| IPI00784842 | Putative uncharacterized protein DKFZp686G11190                                       | K.ALPAPIEK.T                               | 1 | 1.81 | 0.11 |       |
| IPI00784842 | Putative uncharacterized protein DKFZp686G11190                                       | K.CKVSNKALPAPIEK.T                         | 2 | 2.28 | 0.15 |       |
| IPI00784842 | Putative uncharacterized protein DKFZp686G11190                                       | K.DTLM*ISR.T                               | 2 | 2.48 | 0.09 | -3.74 |
| IPI00784842 | Putative uncharacterized protein DKFZp686G11190                                       | K.DTLMISR.T                                | 1 | 2.38 | 0.13 |       |
| IPI00784842 | Putative uncharacterized protein DKFZp686G11190                                       | K.DTLMISR.T                                | 2 | 2.45 | 0.16 |       |
| IPI00784842 | Putative uncharacterized protein DKFZp686G11190                                       | K.FNWYVDGVEVHNAK.T                         | 1 | 3.93 | 0.41 |       |
| IPI00784842 | Putative uncharacterized protein DKFZp686G11190                                       | K.FNWYVDGVEVHNAK.T                         | 2 | 5.51 | 0.51 |       |
| IPI00784842 | Putative uncharacterized protein DKFZp686G11190                                       | K.FNWYVDGVEVHNAK.T                         | 3 | 3.99 | 0.38 |       |
| IPI00784842 | Putative uncharacterized protein DKFZp686G11190                                       | K.GFYPSDIAVEWESNGQPENNYK.T                 | 2 | 4.88 | 0.31 |       |
| IPI00784842 | Putative uncharacterized protein DKFZp686G11190                                       | K.GFYPSDIAVEWESNGQPENNYK.T                 | 3 | 4.56 | 0.26 |       |
| IPI00784842 | Putative uncharacterized protein DKFZp686G11190                                       | K.GFYPSDIAVEWESNGQPENNYKTPPVLDSDGSFFLYSK.L | 3 | 4.64 | 0.25 |       |
| IPI00784842 | Putative uncharacterized protein DKFZp686G11190                                       | K.GPSVFPLAPSSK.S                           | 1 | 3.15 | 0.35 |       |
| IPI00784842 | Putative uncharacterized protein DKFZp686G11190                                       | K.GPSVFPLAPSSK.S                           | 2 | 3.30 | 0.36 |       |
| IPI00784842 | Putative uncharacterized protein DKFZp686G11190                                       | K.GPSVFPLAPSSKSTSGGTAALGCLVK.D             | 2 | 4.62 | 0.48 |       |
| IPI00784842 | Putative uncharacterized protein DKFZp686G11190                                       | K.GPSVFPLAPSSKSTSGGTAALGCLVK.D             | 3 | 4.18 | 0.48 |       |
| IPI00784842 | Putative uncharacterized protein DKFZp686G11190                                       | K.GQPREPQVYTLPPSR.E                        | 2 | 2.89 | 0.13 |       |

|             |                                                 |                                   |   |      |      |       |
|-------------|-------------------------------------------------|-----------------------------------|---|------|------|-------|
| IPI00784842 | Putative uncharacterized protein DKFZp686G11190 | K.GQPREPQVYTLPPSR.E               | 3 | 2.92 | 0.17 |       |
| IPI00784842 | Putative uncharacterized protein DKFZp686G11190 | K.GQPREPQVYTLPPSRDELTK.N          | 3 | 4.51 | 0.32 |       |
| IPI00784842 | Putative uncharacterized protein DKFZp686G11190 | K.NQVSLTCLVK.G                    | 1 | 2.26 | 0.22 |       |
| IPI00784842 | Putative uncharacterized protein DKFZp686G11190 | K.NQVSLTCLVK.G                    | 2 | 2.44 | 0.28 | -2.15 |
| IPI00784842 | Putative uncharacterized protein DKFZp686G11190 | K.SCDKTHTCPAPPELLGGPSVFLFPPKPK.D  | 3 | 6.71 | 0.47 |       |
| IPI00784842 | Putative uncharacterized protein DKFZp686G11190 | K.THTCPPCPAPPELLGGPSVFLFPPKPK.D   | 2 | 3.81 | 0.39 |       |
| IPI00784842 | Putative uncharacterized protein DKFZp686G11190 | K.THTCPPCPAPPELLGGPSVFLFPPKPK.D   | 3 | 6.29 | 0.52 |       |
| IPI00784842 | Putative uncharacterized protein DKFZp686G11190 | K.TKPREEQYNSTYR.V                 | 2 | 2.99 | 0.10 |       |
| IPI00784842 | Putative uncharacterized protein DKFZp686G11190 | K.TTPPVLDSDGSFFLYSK.L             | 1 | 3.22 | 0.41 |       |
| IPI00784842 | Putative uncharacterized protein DKFZp686G11190 | K.TTPPVLDSDGSFFLYSK.L             | 2 | 3.42 | 0.37 |       |
| IPI00784842 | Putative uncharacterized protein DKFZp686G11190 | K.TTPPVLDSDGSFFLYSK.L             | 3 | 4.11 | 0.39 |       |
| IPI00784842 | Putative uncharacterized protein DKFZp686G11190 | K.VSNKALPAPIEK.T                  | 2 | 3.33 | 0.18 |       |
| IPI00784842 | Putative uncharacterized protein DKFZp686G11190 | K.WYVDGVEVHNAK.T                  | 1 | 2.91 | 0.35 |       |
| IPI00784842 | Putative uncharacterized protein DKFZp686G11190 | K.WYVDGVEVHNAK.T                  | 2 | 3.90 | 0.46 |       |
| IPI00784842 | Putative uncharacterized protein DKFZp686G11190 | K.WYVDGVEVHNAK.T                  | 3 | 2.99 | 0.21 |       |
| IPI00784842 | Putative uncharacterized protein DKFZp686G11190 | R.ADDTAVYYCAR.A                   | 2 | 4.39 | 0.38 |       |
| IPI00784842 | Putative uncharacterized protein DKFZp686G11190 | R.CPAPPELLGGPSVFLFPPKPK.D         | 2 | 4.00 | 0.37 |       |
| IPI00784842 | Putative uncharacterized protein DKFZp686G11190 | R.CPAPPELLGGPSVFLFPPKPK.D         | 3 | 6.31 | 0.49 |       |
| IPI00784842 | Putative uncharacterized protein DKFZp686G11190 | R.CPAPPELLGGPSVFLFPPKPKDTLM*ISR.T | 3 | 3.77 | 0.23 |       |
| IPI00784842 | Putative uncharacterized protein DKFZp686G11190 | R.EPQVYTLPPSRDELTK.N              | 2 | 3.97 | 0.21 |       |
| IPI00784842 | Putative uncharacterized protein DKFZp686G11190 | R.EPQVYTLPPSRDELTKNQVSLTCLVK.G    | 3 | 4.03 | 0.23 |       |

|             |                                                 |                                           |   |      |      |       |
|-------------|-------------------------------------------------|-------------------------------------------|---|------|------|-------|
| IPI00784842 | Putative uncharacterized protein DKFZp686G11190 | R.LSCAASGFTFR.S                           | 2 | 3.55 | 0.31 |       |
| IPI00784842 | Putative uncharacterized protein DKFZp686G11190 | R.STSGGTAALGCLVK.D                        | 1 | 2.45 | 0.34 |       |
| IPI00784842 | Putative uncharacterized protein DKFZp686G11190 | R.STSGGTAALGCLVK.D                        | 2 | 4.37 | 0.45 |       |
| IPI00784842 | Putative uncharacterized protein DKFZp686G11190 | R.TPEVTCVVVDVSHED.P                       | 2 | 5.50 | 0.52 |       |
| IPI00784842 | Putative uncharacterized protein DKFZp686G11190 | R.VVSVLTVLHQDWLNGK.E                      | 1 | 4.22 | 0.41 |       |
| IPI00784842 | Putative uncharacterized protein DKFZp686G11190 | R.VVSVLTVLHQDWLNGK.E                      | 2 | 5.39 | 0.46 |       |
| IPI00784842 | Putative uncharacterized protein DKFZp686G11190 | R.VVSVLTVLHQDWLNGK.E                      | 3 | 3.42 | 0.38 |       |
| IPI00784842 | Putative uncharacterized protein DKFZp686G11190 | R.VVSVLTVLHQDWLNGKEYK.C                   | 2 | 5.56 | 0.40 |       |
| IPI00784842 | Putative uncharacterized protein DKFZp686G11190 | R.VVSVLTVLHQDWLNGKEYK.C                   | 3 | 4.97 | 0.40 |       |
| IPI00784865 | IGK@ protein                                    | K.ADYEKHKVYACEVTHQGLSSPVTK.S              | 3 | 6.20 | 0.45 |       |
| IPI00784865 | IGK@ protein                                    | K.DSTYLSSTLTLSK.A                         | 1 | 3.19 | 0.31 |       |
| IPI00784865 | IGK@ protein                                    | K.DSTYLSSTLTLSK.A                         | 2 | 2.59 | 0.17 | -2.80 |
| IPI00784865 | IGK@ protein                                    | K.DSTYLSSTLTLSK.A                         | 3 | 3.23 | 0.27 |       |
| IPI00784865 | IGK@ protein                                    | K.HKVYACEVTHQGLSSPVTK.S                   | 3 | 4.56 | 0.36 |       |
| IPI00784865 | IGK@ protein                                    | K.RTVAAPSVFIFPPSDEQLK.S                   | 2 | 5.74 | 0.42 |       |
| IPI00784865 | IGK@ protein                                    | K.RTVAAPSVFIFPPSDEQLK.S                   | 3 | 4.14 | 0.22 |       |
| IPI00784865 | IGK@ protein                                    | K.SGTASVVCLLNNFYPR.E                      | 1 | 4.08 | 0.39 |       |
| IPI00784865 | IGK@ protein                                    | K.SGTASVVCLLNNFYPR.E                      | 2 | 3.05 | 0.36 | -5.56 |
| IPI00784865 | IGK@ protein                                    | K.SGTASVVCLLNNFYPR.E                      | 3 | 4.63 | 0.31 |       |
| IPI00784865 | IGK@ protein                                    | K.VDNALQSGNSQESVTEQDSK.D                  | 2 | 5.40 | 0.58 | -3.51 |
| IPI00784865 | IGK@ protein                                    | K.VDNALQSGNSQESVTEQDSK.D                  | 3 | 4.56 | 0.42 | -2.63 |
| IPI00784865 | IGK@ protein                                    | K.VDNALQSGNSQESVTEQDSKDSTYLSSTLTLSK.A     | 2 | 3.56 | 0.49 |       |
| IPI00784865 | IGK@ protein                                    | K.VDNALQSGNSQESVTEQDSKDSTYLSSTLTLSK.A     | 3 | 6.26 | 0.51 |       |
| IPI00784865 | IGK@ protein                                    | K.VDNALQSGNSQESVTEQDSKDSTYLSSTLTLSKADYK.H | 3 | 4.65 | 0.36 |       |
| IPI00784865 | IGK@ protein                                    | K.VQWKVDNALQSGNSQESVTEQDSK.D              | 2 | 5.17 | 0.41 |       |
| IPI00784865 | IGK@ protein                                    | K.VQWKVDNALQSGNSQESVTEQDSK.D              | 3 | 6.42 | 0.38 |       |
| IPI00784865 | IGK@ protein                                    | K.VQWKVDNALQSGNSQESVTEQDSKDSTYLSSTLTLSK.A | 3 | 5.65 | 0.43 |       |
| IPI00784865 | IGK@ protein                                    | K.VYACEVTHQGLSSPVTK.S                     | 1 | 4.33 | 0.48 |       |
| IPI00784865 | IGK@ protein                                    | K.VYACEVTHQGLSSPVTK.S                     | 2 | 5.40 | 0.48 |       |
| IPI00784865 | IGK@ protein                                    | K.VYACEVTHQGLSSPVTK.S                     | 3 | 4.16 | 0.44 |       |
| IPI00784865 | IGK@ protein                                    | Q.SGNSQESVTEQDSKDSTYLSSTLTLSK.A           | 3 | 6.25 | 0.52 |       |
| IPI00784865 | IGK@ protein                                    | R.LLIYGASSR.A                             | 2 | 3.35 | 0.21 |       |
| IPI00784865 | IGK@ protein                                    | R.TVAAPSVF.-                              | 1 | 1.75 | 0.12 |       |

|             |                                  |                                              |   |      |      |       |
|-------------|----------------------------------|----------------------------------------------|---|------|------|-------|
| IPI00784865 | IGK@ protein                     | R.TVAAPSVFIFPPSDEQLK.S                       | 1 | 3.65 | 0.48 |       |
| IPI00784865 | IGK@ protein                     | R.TVAAPSVFIFPPSDEQLK.S                       | 2 | 4.89 | 0.48 |       |
| IPI00784865 | IGK@ protein                     | R.TVAAPSVFIFPPSDEQLK.S                       | 3 | 4.07 | 0.25 |       |
| IPI00784865 | IGK@ protein                     | R.TVAAPSVFIFPPSDEQLKSGTASVCLLNFFYPR.E        | 3 | 5.23 | 0.48 |       |
| IPI00784865 | IGK@ protein                     | V.YACEVTHQGLSSPVTK.S                         | 2 | 5.14 | 0.43 |       |
| IPI00784880 | Cancer/testis antigen 75         | R.ISPFPGLGSR.K                               | 2 | 1.58 | 0.21 |       |
| IPI00784894 | Putative uncharacterized protein | K.ALPAPIEK.T                                 | 1 | 1.81 | 0.11 |       |
| IPI00784894 | Putative uncharacterized protein | K.CKVSNKALPAPIEK.T                           | 2 | 2.28 | 0.15 |       |
| IPI00784894 | Putative uncharacterized protein | K.DTLM*ISR.T                                 | 2 | 2.48 | 0.09 | -3.74 |
| IPI00784894 | Putative uncharacterized protein | K.DTLMISR.T                                  | 1 | 2.38 | 0.13 |       |
| IPI00784894 | Putative uncharacterized protein | K.DTLMISR.T                                  | 2 | 2.45 | 0.16 |       |
| IPI00784894 | Putative uncharacterized protein | K.GFYPSDIAVEWESSGQPENNYNTTTPM*LSDGSSFFLYSK.L | 3 | 5.59 | 0.44 |       |
| IPI00784894 | Putative uncharacterized protein | K.GFYPSDIAVEWESSGQPENNYNTTTPMLDSDGSSFFLYSK.L | 3 | 3.90 | 0.14 |       |
| IPI00784894 | Putative uncharacterized protein | K.GPSVFPLAPCSR.S                             | 1 | 2.54 | 0.34 |       |
| IPI00784894 | Putative uncharacterized protein | K.GPSVFPLAPCSR.S                             | 2 | 3.53 | 0.37 |       |
| IPI00784894 | Putative uncharacterized protein | K.GQPREPQVYTLPPSR.E                          | 2 | 2.89 | 0.13 |       |
| IPI00784894 | Putative uncharacterized protein | K.GQPREPQVYTLPPSR.E                          | 3 | 2.92 | 0.17 |       |
| IPI00784894 | Putative uncharacterized protein | K.GQPREPQVYTLPPSREEM*TK.N                    | 3 | 3.87 | 0.30 |       |
| IPI00784894 | Putative uncharacterized protein | K.GQPREPQVYTLPPSREEM*TKNQVSLTCLVK.G          | 3 | 3.18 | 0.26 |       |
| IPI00784894 | Putative uncharacterized protein | K.GQPREPQVYTLPPSREEMTK.N                     | 3 | 3.97 | 0.17 |       |
| IPI00784894 | Putative uncharacterized protein | K.NQVSLTCLVK.G                               | 1 | 2.26 | 0.22 |       |
| IPI00784894 | Putative uncharacterized protein | K.NQVSLTCLVK.G                               | 2 | 2.44 | 0.28 | -2.15 |
| IPI00784894 | Putative uncharacterized protein | K.SCDTPPCPR.C                                | 2 | 3.01 | 0.17 |       |
| IPI00784894 | Putative uncharacterized protein | K.TKGQPREPQVYTLPPSREEM*TK.N                  | 3 | 3.08 | 0.11 |       |
| IPI00784894 | Putative uncharacterized protein | K.TPLGDTTHTCPR.C                             | 1 | 2.57 | 0.43 |       |
| IPI00784894 | Putative uncharacterized protein | K.TPLGDTTHTCPR.C                             | 2 | 4.10 | 0.40 |       |
| IPI00784894 | Putative uncharacterized protein | K.TPLGDTTHTCPR.C                             | 3 | 2.70 | 0.27 |       |
| IPI00784894 | Putative uncharacterized protein | K.VSNKALPAPIEK.T                             | 2 | 3.33 | 0.18 |       |
| IPI00784894 | Putative uncharacterized protein | K.WYVDGVEVHNAK.T                             | 1 | 2.91 | 0.35 |       |
| IPI00784894 | Putative uncharacterized protein | K.WYVDGVEVHNAK.T                             | 2 | 3.90 | 0.46 |       |
| IPI00784894 | Putative uncharacterized protein | K.WYVDGVEVHNAK.T                             | 3 | 2.99 | 0.21 |       |
| IPI00784894 | Putative uncharacterized protein | Q.FKWYVDGVEVHNAK.T                           | 1 | 3.71 | 0.30 |       |
| IPI00784894 | Putative uncharacterized protein | R.CPAPELLGGPSVFLFPPKPK.D                     | 2 | 4.00 | 0.37 |       |
| IPI00784894 | Putative uncharacterized protein | R.CPAPELLGGPSVFLFPPKPK.D                     | 3 | 6.31 | 0.49 |       |
| IPI00784894 | Putative uncharacterized protein | R.CPAPELLGGPSVFLFPPKPKDTLM*ISR.T             | 3 | 3.77 | 0.23 |       |
| IPI00784894 | Putative uncharacterized protein | R.EEM*TKNQVSLTCLVK.G                         | 2 | 3.75 | 0.32 |       |
| IPI00784894 | Putative uncharacterized protein | R.EPQVYTLPPSREEM*TK.N                        | 1 | 2.26 | 0.37 |       |
| IPI00784894 | Putative uncharacterized protein | R.EPQVYTLPPSREEM*TK.N                        | 2 | 4.02 | 0.44 |       |
| IPI00784894 | Putative uncharacterized protein | R.EPQVYTLPPSREEM*TKNQVSLTCLVK.G              | 3 | 2.94 | 0.15 |       |
| IPI00784894 | Putative uncharacterized protein | R.EPQVYTLPPSREEMTK.N                         | 1 | 2.97 | 0.15 |       |
| IPI00784894 | Putative uncharacterized protein | R.EPQVYTLPPSREEMTK.N                         | 2 | 3.92 | 0.38 |       |
| IPI00784894 | Putative uncharacterized protein | R.EPQVYTLPPSREEMTKNQVSLTCLVK.G               | 3 | 3.59 | 0.25 |       |

|             |                                                 |                                             |   |      |      |       |
|-------------|-------------------------------------------------|---------------------------------------------|---|------|------|-------|
| IPI00784894 | Putative uncharacterized protein                | R.STSGGTAALGCLVK.D                          | 1 | 2.45 | 0.34 |       |
| IPI00784894 | Putative uncharacterized protein                | R.STSGGTAALGCLVK.D                          | 2 | 4.37 | 0.45 |       |
| IPI00784894 | Putative uncharacterized protein                | R.TPEVTCVVVDVSHED.P                         | 2 | 5.50 | 0.52 |       |
| IPI00784894 | Putative uncharacterized protein                | R.TPEVTCVVVDVSHEDPEVQFK.W                   | 2 | 5.17 | 0.45 |       |
| IPI00784894 | Putative uncharacterized protein                | R.TPEVTCVVVDVSHEDPEVQFK.W                   | 3 | 5.15 | 0.45 |       |
| IPI00784894 | Putative uncharacterized protein                | R.VELKTPLGDTTHTCPR.C                        | 3 | 4.04 | 0.23 |       |
| IPI00784894 | Putative uncharacterized protein                | R.VVSVLTVLHQDWLNGK.E                        | 1 | 4.22 | 0.41 |       |
| IPI00784894 | Putative uncharacterized protein                | R.VVSVLTVLHQDWLNGK.E                        | 2 | 5.39 | 0.46 |       |
| IPI00784894 | Putative uncharacterized protein                | R.VVSVLTVLHQDWLNGK.E                        | 3 | 3.42 | 0.38 |       |
| IPI00784894 | Putative uncharacterized protein                | R.VVSVLTVLHQDWLNGKEYK.C                     | 2 | 5.56 | 0.40 |       |
| IPI00784894 | Putative uncharacterized protein                | R.VVSVLTVLHQDWLNGKEYK.C                     | 3 | 4.97 | 0.40 |       |
| IPI00784894 | Putative uncharacterized protein                | R.WQQGNIFSCSVM*HEALHNR.F                    | 2 | 4.65 | 0.34 |       |
| IPI00784894 | Putative uncharacterized protein                | R.WQQGNIFSCSVM*HEALHNR.F                    | 3 | 3.11 | 0.22 |       |
| IPI00784942 | Putative uncharacterized protein DKFZp686E23209 | K.CKVSNGKLPAPIEK.T                          | 3 | 2.67 | 0.22 |       |
| IPI00784942 | Putative uncharacterized protein DKFZp686E23209 | K.DTLM*ISR.T                                | 2 | 2.48 | 0.09 | -3.74 |
| IPI00784942 | Putative uncharacterized protein DKFZp686E23209 | K.DTLMISR.T                                 | 1 | 2.38 | 0.13 |       |
| IPI00784942 | Putative uncharacterized protein DKFZp686E23209 | K.DTLMISR.T                                 | 2 | 2.45 | 0.16 |       |
| IPI00784942 | Putative uncharacterized protein DKFZp686E23209 | K.FNWWYVDGVEVHNAK.T                         | 1 | 3.93 | 0.41 |       |
| IPI00784942 | Putative uncharacterized protein DKFZp686E23209 | K.FNWWYVDGVEVHNAK.T                         | 2 | 5.51 | 0.51 |       |
| IPI00784942 | Putative uncharacterized protein DKFZp686E23209 | K.FNWWYVDGVEVHNAK.T                         | 3 | 3.99 | 0.38 |       |
| IPI00784942 | Putative uncharacterized protein DKFZp686E23209 | K.GFYPSDIAVEWESNGQPENNYK.T                  | 2 | 4.88 | 0.31 |       |
| IPI00784942 | Putative uncharacterized protein DKFZp686E23209 | K.GFYPSDIAVEWESNGQPENNYK.T                  | 3 | 4.56 | 0.26 |       |
| IPI00784942 | Putative uncharacterized protein DKFZp686E23209 | K.GFYPSDIAVEWESNGQPENNYKATPPMLDSDGSFFLYSK.L | 3 | 4.61 | 0.14 |       |
| IPI00784942 | Putative uncharacterized protein DKFZp686E23209 | K.GPSVFPLAPCSR.S                            | 1 | 2.54 | 0.34 |       |
| IPI00784942 | Putative uncharacterized protein DKFZp686E23209 | K.GPSVFPLAPCSR.S                            | 2 | 3.53 | 0.37 |       |
| IPI00784942 | Putative uncharacterized protein DKFZp686E23209 | K.GPSVFPLAPCSRSTSESTAALGCLVK.D              | 2 | 3.65 | 0.35 |       |
| IPI00784942 | Putative uncharacterized protein DKFZp686E23209 | K.GQPREPQVYTLPPSR.E                         | 2 | 2.89 | 0.13 |       |

|             |                                                 |                                     |   |      |      |       |
|-------------|-------------------------------------------------|-------------------------------------|---|------|------|-------|
| IPI00784942 | Putative uncharacterized protein DKFZp686E23209 | K.GQPREPQVYTLPPSR.E                 | 3 | 2.92 | 0.17 |       |
| IPI00784942 | Putative uncharacterized protein DKFZp686E23209 | K.GQPREPQVYTLPPSREEM*TK.N           | 3 | 3.87 | 0.30 |       |
| IPI00784942 | Putative uncharacterized protein DKFZp686E23209 | K.GQPREPQVYTLPPSREEM*TKNQVSLTCLVK.G | 3 | 3.18 | 0.26 |       |
| IPI00784942 | Putative uncharacterized protein DKFZp686E23209 | K.GQPREPQVYTLPPSREEMTK.N            | 3 | 3.97 | 0.17 |       |
| IPI00784942 | Putative uncharacterized protein DKFZp686E23209 | K.NQVSLTCLVK.G                      | 1 | 2.26 | 0.22 |       |
| IPI00784942 | Putative uncharacterized protein DKFZp686E23209 | K.NQVSLTCLVK.G                      | 2 | 2.44 | 0.28 | -2.15 |
| IPI00784942 | Putative uncharacterized protein DKFZp686E23209 | K.TKGQPREPQVYTLPPSREEM*TK.N         | 3 | 3.08 | 0.11 |       |
| IPI00784942 | Putative uncharacterized protein DKFZp686E23209 | K.VSNKGLPAPIEK.T                    | 1 | 2.10 | 0.15 |       |
| IPI00784942 | Putative uncharacterized protein DKFZp686E23209 | K.VSNKGLPAPIEK.T                    | 2 | 3.30 | 0.19 |       |
| IPI00784942 | Putative uncharacterized protein DKFZp686E23209 | K.WYVDGVEVHNAK.T                    | 1 | 2.91 | 0.35 |       |
| IPI00784942 | Putative uncharacterized protein DKFZp686E23209 | K.WYVDGVEVHNAK.T                    | 2 | 3.90 | 0.46 |       |
| IPI00784942 | Putative uncharacterized protein DKFZp686E23209 | K.WYVDGVEVHNAK.T                    | 3 | 2.99 | 0.21 |       |
| IPI00784942 | Putative uncharacterized protein DKFZp686E23209 | R.EEM*TKNQVSLTCLVK.G                | 2 | 3.75 | 0.32 |       |
| IPI00784942 | Putative uncharacterized protein DKFZp686E23209 | R.EPQVYTLPPSREEM*TK.N               | 1 | 2.26 | 0.37 |       |
| IPI00784942 | Putative uncharacterized protein DKFZp686E23209 | R.EPQVYTLPPSREEM*TK.N               | 2 | 4.02 | 0.44 |       |
| IPI00784942 | Putative uncharacterized protein DKFZp686E23209 | R.EPQVYTLPPSREEM*TKNQVSLTCLVK.G     | 3 | 2.94 | 0.15 |       |
| IPI00784942 | Putative uncharacterized protein DKFZp686E23209 | R.EPQVYTLPPSREEMTK.N                | 1 | 2.97 | 0.15 |       |
| IPI00784942 | Putative uncharacterized protein DKFZp686E23209 | R.EPQVYTLPPSREEMTK.N                | 2 | 3.92 | 0.38 |       |
| IPI00784942 | Putative uncharacterized protein DKFZp686E23209 | R.EPQVYTLPPSREEMTKNQVSLTCLVK.G      | 3 | 3.59 | 0.25 |       |
| IPI00784942 | Putative uncharacterized protein DKFZp686E23209 | R.STSESTAALGCLVK.D                  | 1 | 2.94 | 0.40 |       |
| IPI00784942 | Putative uncharacterized protein DKFZp686E23209 | R.STSESTAALGCLVK.D                  | 2 | 4.70 | 0.44 |       |

|             |                                                 |                                                  |   |      |      |       |
|-------------|-------------------------------------------------|--------------------------------------------------|---|------|------|-------|
| IPI00784942 | Putative uncharacterized protein DKFZp686E23209 | R.STSESTAALGCLVK.D                               | 3 | 3.43 | 0.20 |       |
| IPI00784942 | Putative uncharacterized protein DKFZp686E23209 | R.TPEVTCVVVDVSHED.P                              | 2 | 5.50 | 0.52 |       |
| IPI00784942 | Putative uncharacterized protein DKFZp686E23209 | R.VVSVLTVVHQDWLNGK.E                             | 1 | 4.17 | 0.39 |       |
| IPI00784942 | Putative uncharacterized protein DKFZp686E23209 | R.VVSVLTVVHQDWLNGK.E                             | 2 | 5.13 | 0.46 |       |
| IPI00784942 | Putative uncharacterized protein DKFZp686E23209 | R.VVSVLTVVHQDWLNGK.E                             | 3 | 3.17 | 0.25 |       |
| IPI00784942 | Putative uncharacterized protein DKFZp686E23209 | R.VVSVLTVVHQDWLNGKEYK.C                          | 2 | 5.56 | 0.47 |       |
| IPI00784942 | Putative uncharacterized protein DKFZp686E23209 | R.VVSVLTVVHQDWLNGKEYK.C                          | 3 | 4.44 | 0.35 |       |
| IPI00784942 | Putative uncharacterized protein DKFZp686E23209 | V.SVLTVVHQDWLNGKEYK.C                            | 2 | 5.09 | 0.35 |       |
| IPI00784950 | Putative uncharacterized protein DKFZp686L19235 | K.GDTFSCMVGHEALPLAFTQK.T                         | 2 | 4.19 | 0.19 |       |
| IPI00784950 | Putative uncharacterized protein DKFZp686L19235 | K.HYTNPQDVTVPCPVPPPPCCHPR.L                      | 3 | 5.66 | 0.35 |       |
| IPI00784950 | Putative uncharacterized protein DKFZp686L19235 | K.KGDTFSCM*VGHEALPLAFTQK.T                       | 2 | 4.91 | 0.41 |       |
| IPI00784950 | Putative uncharacterized protein DKFZp686L19235 | K.KGDTFSCM*VGHEALPLAFTQK.T                       | 3 | 3.90 | 0.44 | -2.10 |
| IPI00784950 | Putative uncharacterized protein DKFZp686L19235 | K.NSLYLQM*NSLR.A                                 | 2 | 3.76 | 0.14 |       |
| IPI00784950 | Putative uncharacterized protein DKFZp686L19235 | K.NSLYLQMNSLR.A                                  | 1 | 3.55 | 0.11 |       |
| IPI00784950 | Putative uncharacterized protein DKFZp686L19235 | K.NSLYLQMNSLR.A                                  | 2 | 4.01 | 0.17 |       |
| IPI00784950 | Putative uncharacterized protein DKFZp686L19235 | K.SAVQGPPER.D                                    | 2 | 2.30 | 0.12 | 0.79  |
| IPI00784950 | Putative uncharacterized protein DKFZp686L19235 | K.SAVQGPPERDLGCGYSVSSVLPGCAQPWNHGETFTCTAAHPELK.T | 3 | 3.92 | 0.18 |       |
| IPI00784950 | Putative uncharacterized protein DKFZp686L19235 | K.SGNTFRPEVHLLPPPSEELALNELVTLTCLAR.G             | 2 | 4.32 | 0.41 |       |
| IPI00784950 | Putative uncharacterized protein DKFZp686L19235 | K.SGNTFRPEVHLLPPPSEELALNELVTLTCLAR.G             | 3 | 6.86 | 0.60 |       |
| IPI00784950 | Putative uncharacterized protein DKFZp686L19235 | K.YLTWASR.Q                                      | 1 | 1.98 | 0.18 |       |
| IPI00784950 | Putative uncharacterized protein DKFZp686L19235 | K.YLTWASR.Q                                      | 2 | 1.93 | 0.24 |       |



|             |                                                 |                                                  |   |      |      |       |
|-------------|-------------------------------------------------|--------------------------------------------------|---|------|------|-------|
| IPI00784950 | Putative uncharacterized protein DKFZp686L19235 | Q.EPSQGTTFVAVTSILR.V                             | 2 | 3.82 | 0.43 | -5.84 |
| IPI00784950 | Putative uncharacterized protein DKFZp686L19235 | R.DASGATFTWTPSSGK.S                              | 2 | 4.55 | 0.44 |       |
| IPI00784950 | Putative uncharacterized protein DKFZp686L19235 | R.DLCGCYSVSSVLPGCAQPWNHGETFTCTAAHPELK.T          | 3 | 5.72 | 0.26 |       |
| IPI00784950 | Putative uncharacterized protein DKFZp686L19235 | R.DNAKNSLYLQM*NSLR.A                             | 2 | 4.82 | 0.44 |       |
| IPI00784950 | Putative uncharacterized protein DKFZp686L19235 | R.DNAKNSLYLQM*NSLR.A                             | 3 | 4.39 | 0.37 |       |
| IPI00784950 | Putative uncharacterized protein DKFZp686L19235 | R.EKYLTWASR.Q                                    | 1 | 2.49 | 0.27 |       |
| IPI00784950 | Putative uncharacterized protein DKFZp686L19235 | R.GFSPKDVLR.W                                    | 2 | 2.81 | 0.13 |       |
| IPI00784950 | Putative uncharacterized protein DKFZp686L19235 | R.NFPPSQDASGDLYTTSSQLTLPATQCPDGK.S               | 2 | 3.66 | 0.39 |       |
| IPI00784950 | Putative uncharacterized protein DKFZp686L19235 | R.NFPPSQDASGDLYTTSSQLTLPATQCPDGK.S               | 3 | 5.98 | 0.54 |       |
| IPI00784950 | Putative uncharacterized protein DKFZp686L19235 | R.QEPSQGTTFVAVTSILR.V                            | 2 | 4.27 | 0.52 |       |
| IPI00784950 | Putative uncharacterized protein DKFZp686L19235 | R.QEPSQGTTFVAVTSILR.V                            | 3 | 4.05 | 0.27 |       |
| IPI00784950 | Putative uncharacterized protein DKFZp686L19235 | R.VAAEDWK.K                                      | 2 | 2.23 | 0.16 |       |
| IPI00784950 | Putative uncharacterized protein DKFZp686L19235 | R.WLQGSQELPR.E                                   | 1 | 3.00 | 0.19 |       |
| IPI00784950 | Putative uncharacterized protein DKFZp686L19235 | R.WLQGSQELPR.E                                   | 2 | 3.80 | 0.33 |       |
| IPI00784950 | Putative uncharacterized protein DKFZp686L19235 | R.WLQGSQELPREK.Y                                 | 2 | 2.71 | 0.15 |       |
| IPI00784950 | Putative uncharacterized protein DKFZp686L19235 | W.GQGTLTVSSASPTSPK.V                             | 2 | 5.02 | 0.45 |       |
| IPI00784969 | Putative uncharacterized protein                | K.GDTFSCMVGHEALPLAFTQK.T                         | 2 | 4.19 | 0.19 |       |
| IPI00784969 | Putative uncharacterized protein                | K.HYTNPSQDVTVPCVPPPPCCHPR.L                      | 3 | 5.66 | 0.35 |       |
| IPI00784969 | Putative uncharacterized protein                | K.KGDTFSCM*VGHEALPLAFTQK.T                       | 2 | 4.91 | 0.41 |       |
| IPI00784969 | Putative uncharacterized protein                | K.KGDTFSCM*VGHEALPLAFTQK.T                       | 3 | 3.90 | 0.44 | -2.10 |
| IPI00784969 | Putative uncharacterized protein                | K.LTSVTAADTAIYYCAR.G                             | 2 | 4.62 | 0.42 |       |
| IPI00784969 | Putative uncharacterized protein                | K.LTSVTAADTAIYYCAR.G                             | 3 | 4.90 | 0.26 |       |
| IPI00784969 | Putative uncharacterized protein                | K.SAVQGPPER.D                                    | 2 | 2.30 | 0.12 | 0.79  |
| IPI00784969 | Putative uncharacterized protein                | K.SAVQGPPERDLCGCYSVSSVLPGCAQPWNHGETFTCTAAHPELK.T | 3 | 3.92 | 0.18 |       |
| IPI00784969 | Putative uncharacterized protein                | K.SGNTFRPEVHLLPPPSEELALNELVTLTCLAR.G             | 2 | 4.32 | 0.41 |       |
| IPI00784969 | Putative uncharacterized protein                | K.SGNTFRPEVHLLPPPSEELALNELVTLTCLAR.G             | 3 | 6.86 | 0.60 |       |

|             |                                  |                                           |   |      |      |       |
|-------------|----------------------------------|-------------------------------------------|---|------|------|-------|
| IPI00784969 | Putative uncharacterized protein | K.YLTWASR.Q                               | 1 | 1.98 | 0.18 |       |
| IPI00784969 | Putative uncharacterized protein | K.YLTWASR.Q                               | 2 | 1.93 | 0.24 |       |
| IPI00784969 | Putative uncharacterized protein | Q.EPSQGTTFVAVTSILR.V                      | 2 | 3.82 | 0.43 | -5.84 |
| IPI00784969 | Putative uncharacterized protein | R.DASGATFTWTPSSGK.S                       | 2 | 4.55 | 0.44 |       |
| IPI00784969 | Putative uncharacterized protein | R.DLCGCYSVSSVLPGCAQPWNHGETFTCTAAHPELK.T   | 3 | 5.72 | 0.26 |       |
| IPI00784969 | Putative uncharacterized protein | R.EKYLWASR.Q                              | 1 | 2.49 | 0.27 |       |
| IPI00784969 | Putative uncharacterized protein | R.GFSPKDVLR.W                             | 2 | 2.81 | 0.13 |       |
| IPI00784969 | Putative uncharacterized protein | R.NFPPSQDASGDLYTTSSQLTLPATQCPDGK.S        | 2 | 3.66 | 0.39 |       |
| IPI00784969 | Putative uncharacterized protein | R.NFPPSQDASGDLYTTSSQLTLPATQCPDGK.S        | 3 | 5.98 | 0.54 |       |
| IPI00784969 | Putative uncharacterized protein | R.QEPSQGTTFVAVTSILR.V                     | 2 | 4.27 | 0.52 |       |
| IPI00784969 | Putative uncharacterized protein | R.QEPSQGTTFVAVTSILR.V                     | 3 | 4.05 | 0.27 |       |
| IPI00784969 | Putative uncharacterized protein | R.VAAEDWK.K                               | 2 | 2.23 | 0.16 |       |
| IPI00784969 | Putative uncharacterized protein | R.VTM*SVDTSK.D                            | 2 | 2.55 | 0.18 |       |
| IPI00784969 | Putative uncharacterized protein | R.WLQGSQELPR.E                            | 1 | 3.00 | 0.19 |       |
| IPI00784969 | Putative uncharacterized protein | R.WLQGSQELPR.E                            | 2 | 3.80 | 0.33 |       |
| IPI00784969 | Putative uncharacterized protein | R.WLQGSQELPREK.Y                          | 2 | 2.71 | 0.15 |       |
| IPI00784985 | IGK@ protein                     | G.EIVLTQSPATLSLSPGER.A                    | 2 | 5.23 | 0.35 |       |
| IPI00784985 | IGK@ protein                     | K.ADYEKHKVYACEVTHQGLSSPVTK.S              | 3 | 6.20 | 0.45 |       |
| IPI00784985 | IGK@ protein                     | K.DSTYLSSTLTLSK.A                         | 1 | 3.19 | 0.31 |       |
| IPI00784985 | IGK@ protein                     | K.DSTYLSSTLTLSK.A                         | 2 | 2.59 | 0.17 | -2.80 |
| IPI00784985 | IGK@ protein                     | K.DSTYLSSTLTLSK.A                         | 3 | 3.23 | 0.27 |       |
| IPI00784985 | IGK@ protein                     | K.HKVYACEVTHQGLSSPVTK.S                   | 3 | 4.56 | 0.36 |       |
| IPI00784985 | IGK@ protein                     | K.RTVAAPSVFIFPPSDEQLK.S                   | 2 | 5.74 | 0.42 |       |
| IPI00784985 | IGK@ protein                     | K.RTVAAPSVFIFPPSDEQLK.S                   | 3 | 4.14 | 0.22 |       |
| IPI00784985 | IGK@ protein                     | K.SGTASVVCLLNNFYPR.E                      | 1 | 4.08 | 0.39 |       |
| IPI00784985 | IGK@ protein                     | K.SGTASVVCLLNNFYPR.E                      | 2 | 3.05 | 0.36 | -5.56 |
| IPI00784985 | IGK@ protein                     | K.SGTASVVCLLNNFYPR.E                      | 3 | 4.63 | 0.31 |       |
| IPI00784985 | IGK@ protein                     | K.VDNALQSGNSQESVTEQDSK.D                  | 2 | 5.40 | 0.58 | -3.51 |
| IPI00784985 | IGK@ protein                     | K.VDNALQSGNSQESVTEQDSK.D                  | 3 | 4.56 | 0.42 | -2.63 |
| IPI00784985 | IGK@ protein                     | K.VDNALQSGNSQESVTEQDSKDYSLSSSTLTLSK.A     | 2 | 3.56 | 0.49 |       |
| IPI00784985 | IGK@ protein                     | K.VDNALQSGNSQESVTEQDSKDYSLSSSTLTLSK.A     | 3 | 6.26 | 0.51 |       |
| IPI00784985 | IGK@ protein                     | K.VDNALQSGNSQESVTEQDSKDYSLSSSTLTLSKADYK.H | 3 | 4.65 | 0.36 |       |
| IPI00784985 | IGK@ protein                     | K.VQWKVDNALQSGNSQESVTEQDSK.D              | 2 | 5.17 | 0.41 |       |
| IPI00784985 | IGK@ protein                     | K.VQWKVDNALQSGNSQESVTEQDSK.D              | 3 | 6.42 | 0.38 |       |
| IPI00784985 | IGK@ protein                     | K.VQWKVDNALQSGNSQESVTEQDSKDYSLSSSTLTLSK.A | 3 | 5.65 | 0.43 |       |
| IPI00784985 | IGK@ protein                     | K.VYACEVTHQGLSSPVTK.S                     | 1 | 4.33 | 0.48 |       |
| IPI00784985 | IGK@ protein                     | K.VYACEVTHQGLSSPVTK.S                     | 2 | 5.40 | 0.48 |       |
| IPI00784985 | IGK@ protein                     | K.VYACEVTHQGLSSPVTK.S                     | 3 | 4.16 | 0.44 |       |
| IPI00784985 | IGK@ protein                     | Q.SGNSQESVTEQDSKDYSLSSSTLTLSK.A           | 3 | 6.25 | 0.52 |       |
| IPI00784985 | IGK@ protein                     | R.ATGIPDRFSGSGGTDFLTISR.L                 | 2 | 4.84 | 0.38 |       |
| IPI00784985 | IGK@ protein                     | R.ATGIPDRFSGSGGTDFLTISR.L                 | 3 | 3.97 | 0.23 |       |
| IPI00784985 | IGK@ protein                     | R.FSGSGGTDFLTISR.L                        | 1 | 2.55 | 0.22 |       |

|             |                                                 |                                        |   |      |      |       |
|-------------|-------------------------------------------------|----------------------------------------|---|------|------|-------|
| IPI00784985 | IGK@ protein                                    | R.FSGSGSGTDFLTISR.L                    | 2 | 4.49 | 0.53 |       |
| IPI00784985 | IGK@ protein                                    | R.TVAAPSVF.-                           | 1 | 1.75 | 0.12 |       |
| IPI00784985 | IGK@ protein                                    | R.TVAAPSVFIFPPSDEQLK.S                 | 1 | 3.65 | 0.48 |       |
| IPI00784985 | IGK@ protein                                    | R.TVAAPSVFIFPPSDEQLK.S                 | 2 | 4.89 | 0.48 |       |
| IPI00784985 | IGK@ protein                                    | R.TVAAPSVFIFPPSDEQLK.S                 | 3 | 4.07 | 0.25 |       |
| IPI00784985 | IGK@ protein                                    | R.TVAAPSVFIFPPSDEQLKSGTASVVCLLNNFYPR.E | 3 | 5.23 | 0.48 |       |
| IPI00784985 | IGK@ protein                                    | V.YACEVTHQGLSSPVTK.S                   | 2 | 5.14 | 0.43 |       |
| IPI00784998 | Putative uncharacterized protein DKFZp686M24218 | K.AKGQPREPQVYTLPPSQEEM*TK.N            | 2 | 3.25 | 0.17 |       |
| IPI00784998 | Putative uncharacterized protein DKFZp686M24218 | K.AKGQPREPQVYTLPPSQEEM*TK.N            | 3 | 3.55 | 0.26 |       |
| IPI00784998 | Putative uncharacterized protein DKFZp686M24218 | K.AKGQPREPQVYTLPPSQEEM*TKNQVSLTCLVK.G  | 3 | 4.21 | 0.19 |       |
| IPI00784998 | Putative uncharacterized protein DKFZp686M24218 | K.DTLM*ISR.T                           | 2 | 2.48 | 0.09 | -3.74 |
| IPI00784998 | Putative uncharacterized protein DKFZp686M24218 | K.DTLMISR.T                            | 1 | 2.38 | 0.13 |       |
| IPI00784998 | Putative uncharacterized protein DKFZp686M24218 | K.DTLMISR.T                            | 2 | 2.45 | 0.16 |       |
| IPI00784998 | Putative uncharacterized protein DKFZp686M24218 | K.FNWKYVDGVEVHNAK.T                    | 1 | 3.93 | 0.41 |       |
| IPI00784998 | Putative uncharacterized protein DKFZp686M24218 | K.FNWKYVDGVEVHNAK.T                    | 2 | 5.51 | 0.51 |       |
| IPI00784998 | Putative uncharacterized protein DKFZp686M24218 | K.FNWKYVDGVEVHNAK.T                    | 3 | 3.99 | 0.38 |       |
| IPI00784998 | Putative uncharacterized protein DKFZp686M24218 | K.GPSVFPLAPCSR.S                       | 1 | 2.54 | 0.34 |       |
| IPI00784998 | Putative uncharacterized protein DKFZp686M24218 | K.GPSVFPLAPCSR.S                       | 2 | 3.53 | 0.37 |       |
| IPI00784998 | Putative uncharacterized protein DKFZp686M24218 | K.GPSVFPLAPCSRSTSESTAALGCLVK.D         | 2 | 3.65 | 0.35 |       |
| IPI00784998 | Putative uncharacterized protein DKFZp686M24218 | K.GQPREPQVYTLPPSQEEM*TK.N              | 2 | 4.81 | 0.42 |       |
| IPI00784998 | Putative uncharacterized protein DKFZp686M24218 | K.GQPREPQVYTLPPSQEEM*TK.N              | 3 | 3.43 | 0.19 |       |
| IPI00784998 | Putative uncharacterized protein DKFZp686M24218 | K.GQPREPQVYTLPPSQEEM*TKNQVSLTCLVK.G    | 3 | 4.44 | 0.36 |       |
| IPI00784998 | Putative uncharacterized protein DKFZp686M24218 | K.GQPREPQVYTLPPSQEEMTK.N               | 2 | 3.38 | 0.16 |       |
| IPI00784998 | Putative uncharacterized protein DKFZp686M24218 | K.NQVSLTCLVK.G                         | 1 | 2.26 | 0.22 |       |

|             |                                                 |                                     |   |      |      |       |
|-------------|-------------------------------------------------|-------------------------------------|---|------|------|-------|
| IPI00784998 | Putative uncharacterized protein DKFZp686M24218 | K.NQVSLTCLVK.G                      | 2 | 2.44 | 0.28 | -2.15 |
| IPI00784998 | Putative uncharacterized protein DKFZp686M24218 | K.TTPPVLDSDGSFFLYSR.L               | 1 | 3.56 | 0.43 |       |
| IPI00784998 | Putative uncharacterized protein DKFZp686M24218 | K.TTPPVLDSDGSFFLYSR.L               | 2 | 4.22 | 0.49 |       |
| IPI00784998 | Putative uncharacterized protein DKFZp686M24218 | K.TTPPVLDSDGSFFLYSR.L               | 3 | 4.52 | 0.37 |       |
| IPI00784998 | Putative uncharacterized protein DKFZp686M24218 | K.VSNKGLPSSIEK.T                    | 1 | 2.12 | 0.16 |       |
| IPI00784998 | Putative uncharacterized protein DKFZp686M24218 | K.VSNKGLPSSIEK.T                    | 2 | 3.08 | 0.16 |       |
| IPI00784998 | Putative uncharacterized protein DKFZp686M24218 | K.WYVDGVEVHNAK.T                    | 1 | 2.91 | 0.35 |       |
| IPI00784998 | Putative uncharacterized protein DKFZp686M24218 | K.WYVDGVEVHNAK.T                    | 2 | 3.90 | 0.46 |       |
| IPI00784998 | Putative uncharacterized protein DKFZp686M24218 | K.WYVDGVEVHNAK.T                    | 3 | 2.99 | 0.21 |       |
| IPI00784998 | Putative uncharacterized protein DKFZp686M24218 | K.YGPPCPSCPAPEFLGGPSVFLFPPKPK.D     | 2 | 4.30 | 0.36 |       |
| IPI00784998 | Putative uncharacterized protein DKFZp686M24218 | K.YGPPCPSCPAPEFLGGPSVFLFPPKPK.D     | 3 | 5.15 | 0.41 |       |
| IPI00784998 | Putative uncharacterized protein DKFZp686M24218 | R.EEM*TKNQVSLTCLVK.G                | 2 | 3.75 | 0.32 |       |
| IPI00784998 | Putative uncharacterized protein DKFZp686M24218 | R.EPQVYTLPPSQEEM*TK.N               | 2 | 2.63 | 0.30 |       |
| IPI00784998 | Putative uncharacterized protein DKFZp686M24218 | R.STSESTAALGCLVK.D                  | 1 | 2.94 | 0.40 |       |
| IPI00784998 | Putative uncharacterized protein DKFZp686M24218 | R.STSESTAALGCLVK.D                  | 2 | 4.70 | 0.44 |       |
| IPI00784998 | Putative uncharacterized protein DKFZp686M24218 | R.STSESTAALGCLVK.D                  | 3 | 3.43 | 0.20 |       |
| IPI00784998 | Putative uncharacterized protein DKFZp686M24218 | R.VESKYGPPCPSCPAPEFLGGPSVFLFPPKPK.D | 3 | 5.42 | 0.42 |       |
| IPI00784998 | Putative uncharacterized protein DKFZp686M24218 | R.VVSVLTVVHQDWLNGK.E                | 1 | 4.17 | 0.39 |       |
| IPI00784998 | Putative uncharacterized protein DKFZp686M24218 | R.VVSVLTVVHQDWLNGK.E                | 2 | 5.13 | 0.46 |       |
| IPI00784998 | Putative uncharacterized protein DKFZp686M24218 | R.VVSVLTVVHQDWLNGK.E                | 3 | 3.17 | 0.25 |       |
| IPI00784998 | Putative uncharacterized protein DKFZp686M24218 | R.VVSVLTVVHQDWLNGKEYK.C             | 2 | 5.56 | 0.47 |       |

|             |                                                 |                                                  |   |      |      |       |
|-------------|-------------------------------------------------|--------------------------------------------------|---|------|------|-------|
| IPI00784998 | Putative uncharacterized protein DKFZp686M24218 | R.VVSVLTVVHQDWLNGKEYK.C                          | 3 | 4.44 | 0.35 |       |
| IPI00784998 | Putative uncharacterized protein DKFZp686M24218 | R.WQEGNVFSCSVM*HEALHNHYTQK.S                     | 3 | 3.35 | 0.22 |       |
| IPI00784998 | Putative uncharacterized protein DKFZp686M24218 | V.SVLTVVHQDWLNGKEYK.C                            | 2 | 5.09 | 0.35 |       |
| IPI00785015 | Isoform 1 of Uncharacterized protein KIAA2030   | R.EVSR A E P P M * S L Q R . E                   | 2 | 1.71 | 0.22 |       |
| IPI00785067 | IGH@ protein                                    | K.GDTFSCMVGHEALPLAFTQK.T                         | 2 | 4.19 | 0.19 |       |
| IPI00785067 | IGH@ protein                                    | K.HYTNPSQDVTVPVPPPPCCCHPR.L                      | 3 | 5.66 | 0.35 |       |
| IPI00785067 | IGH@ protein                                    | K.KGDTFSCM*VGHEALPLAFTQK.T                       | 2 | 4.91 | 0.41 |       |
| IPI00785067 | IGH@ protein                                    | K.KGDTFSCM*VGHEALPLAFTQK.T                       | 3 | 3.90 | 0.44 | -2.10 |
| IPI00785067 | IGH@ protein                                    | K.SAVQGPPER.D                                    | 2 | 2.30 | 0.12 | 0.79  |
| IPI00785067 | IGH@ protein                                    | K.SAVQGPPERDLGCGYSVSSVLPGCAQPWNHGETFTCTAAHPELK.T | 3 | 3.92 | 0.18 |       |
| IPI00785067 | IGH@ protein                                    | K.SDDTALYCAR.G                                   | 2 | 4.31 | 0.26 |       |
| IPI00785067 | IGH@ protein                                    | K.SGNTFRPEVHLLPPPSEELALNELVTLTCLAR.G             | 2 | 4.32 | 0.41 |       |
| IPI00785067 | IGH@ protein                                    | K.SGNTFRPEVHLLPPPSEELALNELVTLTCLAR.G             | 3 | 6.86 | 0.60 |       |
| IPI00785067 | IGH@ protein                                    | K.YLTWASR.Q                                      | 1 | 1.98 | 0.18 |       |
| IPI00785067 | IGH@ protein                                    | K.YLTWASR.Q                                      | 2 | 1.93 | 0.24 |       |
| IPI00785067 | IGH@ protein                                    | Q.EPSQGTTFVAVTSILR.V                             | 2 | 3.82 | 0.43 | -5.84 |
| IPI00785067 | IGH@ protein                                    | R.DASGATFTWTPSSGK.S                              | 2 | 4.55 | 0.44 |       |
| IPI00785067 | IGH@ protein                                    | R.DLGCYSVSSVLPGCAQPWNHGETFTCTAAHPELK.T           | 3 | 5.72 | 0.26 |       |
| IPI00785067 | IGH@ protein                                    | R.EKYLTWASR.Q                                    | 1 | 2.49 | 0.27 |       |
| IPI00785067 | IGH@ protein                                    | R.GFSPKDVLR.W                                    | 2 | 2.81 | 0.13 |       |
| IPI00785067 | IGH@ protein                                    | R.NFPPSQDASGDLYTTSSQLTLPATQCPDGK.S               | 2 | 3.66 | 0.39 |       |
| IPI00785067 | IGH@ protein                                    | R.NFPPSQDASGDLYTTSSQLTLPATQCPDGK.S               | 3 | 5.98 | 0.54 |       |
| IPI00785067 | IGH@ protein                                    | R.QEPSQGTTFVAVTSILR.V                            | 2 | 4.27 | 0.52 |       |
| IPI00785067 | IGH@ protein                                    | R.QEPSQGTTFVAVTSILR.V                            | 3 | 4.05 | 0.27 |       |
| IPI00785067 | IGH@ protein                                    | R.VAAEDWK.K                                      | 2 | 2.23 | 0.16 |       |
| IPI00785067 | IGH@ protein                                    | R.WLQGSQELPR.E                                   | 1 | 3.00 | 0.19 |       |
| IPI00785067 | IGH@ protein                                    | R.WLQGSQELPR.E                                   | 2 | 3.80 | 0.33 |       |
| IPI00785067 | IGH@ protein                                    | R.WLQGSQELPREK.Y                                 | 2 | 2.71 | 0.15 |       |
| IPI00785067 | IGH@ protein                                    | W.GQGTLTVSSASPTSPK.V                             | 2 | 5.02 | 0.45 |       |
| IPI00785079 | Putative uncharacterized protein                | K.ADGSPVKAGVETTKPSK.Q                            | 2 | 3.18 | 0.20 |       |
| IPI00785079 | Putative uncharacterized protein                | K.ADGSPVKAGVETTKPSK.Q                            | 3 | 3.41 | 0.23 |       |
| IPI00785079 | Putative uncharacterized protein                | K.AGVETTKPSK.Q                                   | 2 | 2.24 | 0.11 | -2.24 |
| IPI00785079 | Putative uncharacterized protein                | K.ANPTVTLFPPSSEELQANK.A                          | 2 | 4.70 | 0.37 |       |
| IPI00785079 | Putative uncharacterized protein                | K.ATLVCLISDFYPGAVTVAWK.A                         | 2 | 5.07 | 0.50 |       |
| IPI00785079 | Putative uncharacterized protein                | K.ATLVCLISDFYPGAVTVAWK.A                         | 3 | 3.53 | 0.31 | -3.63 |
| IPI00785079 | Putative uncharacterized protein                | K.QSNNKYAASSYLSLTPEQWK.S                         | 2 | 5.38 | 0.37 |       |
| IPI00785079 | Putative uncharacterized protein                | K.QSNNKYAASSYLSLTPEQWK.S                         | 3 | 4.26 | 0.33 |       |
| IPI00785079 | Putative uncharacterized protein                | K.VTVLRQPK.A                                     | 2 | 2.24 | 0.10 |       |
| IPI00785079 | Putative uncharacterized protein                | K.YAASSYLSLTPEQWK.S                              | 1 | 3.49 | 0.43 |       |

|             |                                    |                                            |   |      |      |       |
|-------------|------------------------------------|--------------------------------------------|---|------|------|-------|
| IPI00785079 | Putative uncharacterized protein   | K.YAASSYLSLTPEQWK.S                        | 2 | 5.52 | 0.47 |       |
| IPI00785079 | Putative uncharacterized protein   | K.YAASSYLSLTPEQWK.S                        | 3 | 3.44 | 0.22 |       |
| IPI00785079 | Putative uncharacterized protein   | R.SYSCQVTHEGSTVEK.T                        | 1 | 3.84 | 0.43 |       |
| IPI00785079 | Putative uncharacterized protein   | R.SYSCQVTHEGSTVEK.T                        | 2 | 3.17 | 0.41 | -4.10 |
| IPI00785079 | Putative uncharacterized protein   | R.SYSCQVTHEGSTVEKTVAPTECS.-                | 2 | 5.35 | 0.45 |       |
| IPI00785079 | Putative uncharacterized protein   | R.SYSCQVTHEGSTVEKTVAPTECS.-                | 3 | 2.78 | 0.26 |       |
| IPI00785084 | Immunoglobulin heavy variable 4-31 | C.DKHTHTCPPCPAPELLGGPSVFLFPPKPK.D          | 3 | 6.55 | 0.38 |       |
| IPI00785084 | Immunoglobulin heavy variable 4-31 | K.ALPAPIEK.T                               | 1 | 1.81 | 0.11 |       |
| IPI00785084 | Immunoglobulin heavy variable 4-31 | K.CKVSNKALPAPIEK.T                         | 2 | 2.28 | 0.15 |       |
| IPI00785084 | Immunoglobulin heavy variable 4-31 | K.DTLM*ISR.T                               | 2 | 2.48 | 0.09 | -3.74 |
| IPI00785084 | Immunoglobulin heavy variable 4-31 | K.DTLMISR.T                                | 1 | 2.38 | 0.13 |       |
| IPI00785084 | Immunoglobulin heavy variable 4-31 | K.DTLMISR.T                                | 2 | 2.45 | 0.16 |       |
| IPI00785084 | Immunoglobulin heavy variable 4-31 | K.FNWYVDGVEVHNAK.T                         | 1 | 3.93 | 0.41 |       |
| IPI00785084 | Immunoglobulin heavy variable 4-31 | K.FNWYVDGVEVHNAK.T                         | 2 | 5.51 | 0.51 |       |
| IPI00785084 | Immunoglobulin heavy variable 4-31 | K.FNWYVDGVEVHNAK.T                         | 3 | 3.99 | 0.38 |       |
| IPI00785084 | Immunoglobulin heavy variable 4-31 | K.GFYPSDIAVEWESNGQPENNYK.T                 | 2 | 4.88 | 0.31 |       |
| IPI00785084 | Immunoglobulin heavy variable 4-31 | K.GFYPSDIAVEWESNGQPENNYK.T                 | 3 | 4.56 | 0.26 |       |
| IPI00785084 | Immunoglobulin heavy variable 4-31 | K.GFYPSDIAVEWESNGQPENNYKTPPVLDSDGSFFLYSK.L | 3 | 4.64 | 0.25 |       |
| IPI00785084 | Immunoglobulin heavy variable 4-31 | K.GPSVFPLAPSSK.S                           | 1 | 3.15 | 0.35 |       |
| IPI00785084 | Immunoglobulin heavy variable 4-31 | K.GPSVFPLAPSSK.S                           | 2 | 3.30 | 0.36 |       |
| IPI00785084 | Immunoglobulin heavy variable 4-31 | K.GPSVFPLAPSSKSTSGGTAALGCLVK.D             | 2 | 4.62 | 0.48 |       |
| IPI00785084 | Immunoglobulin heavy variable 4-31 | K.GPSVFPLAPSSKSTSGGTAALGCLVK.D             | 3 | 4.18 | 0.48 |       |
| IPI00785084 | Immunoglobulin heavy variable 4-31 | K.GQPREPQVYTLPPSR.E                        | 2 | 2.89 | 0.13 |       |
| IPI00785084 | Immunoglobulin heavy variable 4-31 | K.GQPREPQVYTLPPSR.E                        | 3 | 2.92 | 0.17 |       |
| IPI00785084 | Immunoglobulin heavy variable 4-31 | K.GQPREPQVYTLPPSRDELTK.N                   | 3 | 4.51 | 0.32 |       |
| IPI00785084 | Immunoglobulin heavy variable 4-31 | K.NQVSLTCLVK.G                             | 1 | 2.26 | 0.22 |       |
| IPI00785084 | Immunoglobulin heavy variable 4-31 | K.NQVSLTCLVK.G                             | 2 | 2.44 | 0.28 | -2.15 |
| IPI00785084 | Immunoglobulin heavy variable 4-31 | K.SCDKHTHTCPPCPAPELLGGPSVFLFPPKPK.D        | 3 | 6.71 | 0.47 |       |
| IPI00785084 | Immunoglobulin heavy variable 4-31 | K.THTCPPCPAPELLGGPSVFLFPPKPK.D             | 2 | 3.81 | 0.39 |       |
| IPI00785084 | Immunoglobulin heavy variable 4-31 | K.THTCPPCPAPELLGGPSVFLFPPKPK.D             | 3 | 6.29 | 0.52 |       |
| IPI00785084 | Immunoglobulin heavy variable 4-31 | K.TKPREEQYNSTYR.V                          | 2 | 2.99 | 0.10 |       |
| IPI00785084 | Immunoglobulin heavy variable 4-31 | K.TTPPVLDSDGSFFLYSK.L                      | 1 | 3.22 | 0.41 |       |
| IPI00785084 | Immunoglobulin heavy variable 4-31 | K.TTPPVLDSDGSFFLYSK.L                      | 2 | 3.42 | 0.37 |       |
| IPI00785084 | Immunoglobulin heavy variable 4-31 | K.TTPPVLDSDGSFFLYSK.L                      | 3 | 4.11 | 0.39 |       |
| IPI00785084 | Immunoglobulin heavy variable 4-31 | K.VSNKALPAPIEK.T                           | 2 | 3.33 | 0.18 |       |
| IPI00785084 | Immunoglobulin heavy variable 4-31 | K.WYVDGVEVHNAK.T                           | 1 | 2.91 | 0.35 |       |
| IPI00785084 | Immunoglobulin heavy variable 4-31 | K.WYVDGVEVHNAK.T                           | 2 | 3.90 | 0.46 |       |
| IPI00785084 | Immunoglobulin heavy variable 4-31 | K.WYVDGVEVHNAK.T                           | 3 | 2.99 | 0.21 |       |
| IPI00785084 | Immunoglobulin heavy variable 4-31 | R.CPAPELLGGPSVFLFPPKPK.D                   | 2 | 4.00 | 0.37 |       |
| IPI00785084 | Immunoglobulin heavy variable 4-31 | R.CPAPELLGGPSVFLFPPKPK.D                   | 3 | 6.31 | 0.49 |       |
| IPI00785084 | Immunoglobulin heavy variable 4-31 | R.CPAPELLGGPSVFLFPPKPKDTLM*ISR.T           | 3 | 3.77 | 0.23 |       |
| IPI00785084 | Immunoglobulin heavy variable 4-31 | R.EPQVYTLPPSRDELTK.N                       | 2 | 3.97 | 0.21 |       |

|             |                                    |                                   |   |      |      |       |
|-------------|------------------------------------|-----------------------------------|---|------|------|-------|
| IPI00785084 | Immunoglobulin heavy variable 4-31 | R.EPQVYTLPPSRDELTKNQVSLTCLVK.G    | 3 | 4.03 | 0.23 |       |
| IPI00785084 | Immunoglobulin heavy variable 4-31 | R.STSGGTAALGCLVK.D                | 1 | 2.45 | 0.34 |       |
| IPI00785084 | Immunoglobulin heavy variable 4-31 | R.STSGGTAALGCLVK.D                | 2 | 4.37 | 0.45 |       |
| IPI00785084 | Immunoglobulin heavy variable 4-31 | R.SVTAADTAVYFCAR.H                | 2 | 4.47 | 0.35 |       |
| IPI00785084 | Immunoglobulin heavy variable 4-31 | R.TPEVTCVVVDVSHED.P               | 2 | 5.50 | 0.52 |       |
| IPI00785084 | Immunoglobulin heavy variable 4-31 | R.VTISLDTSKNQFSLK.M               | 2 | 3.09 | 0.10 |       |
| IPI00785084 | Immunoglobulin heavy variable 4-31 | R.VVSVLTVLHQDWLNGK.E              | 1 | 4.22 | 0.41 |       |
| IPI00785084 | Immunoglobulin heavy variable 4-31 | R.VVSVLTVLHQDWLNGK.E              | 2 | 5.39 | 0.46 |       |
| IPI00785084 | Immunoglobulin heavy variable 4-31 | R.VVSVLTVLHQDWLNGK.E              | 3 | 3.42 | 0.38 |       |
| IPI00785084 | Immunoglobulin heavy variable 4-31 | R.VVSVLTVLHQDWLNGKEYK.C           | 2 | 5.56 | 0.40 |       |
| IPI00785084 | Immunoglobulin heavy variable 4-31 | R.VVSVLTVLHQDWLNGKEYK.C           | 3 | 4.97 | 0.40 |       |
| IPI00785196 | Putative uncharacterized protein   | K.AAPSVTLFPPSSEELQANK.A           | 1 | 4.04 | 0.50 |       |
| IPI00785196 | Putative uncharacterized protein   | K.AAPSVTLFPPSSEELQANK.A           | 2 | 3.15 | 0.34 | -1.50 |
| IPI00785196 | Putative uncharacterized protein   | K.AAPSVTLFPPSSEELQANK.A           | 3 | 3.32 | 0.13 |       |
| IPI00785196 | Putative uncharacterized protein   | K.ADSSPVKAGVETTTPSK.Q             | 1 | 3.85 | 0.37 |       |
| IPI00785196 | Putative uncharacterized protein   | K.ADSSPVKAGVETTTPSK.Q             | 2 | 3.50 | 0.38 |       |
| IPI00785196 | Putative uncharacterized protein   | K.ADSSPVKAGVETTTPSK.Q             | 3 | 3.46 | 0.35 |       |
| IPI00785196 | Putative uncharacterized protein   | K.ADSSPVKAGVETTTPSKQSNK.Y         | 2 | 5.35 | 0.42 |       |
| IPI00785196 | Putative uncharacterized protein   | K.ADSSPVKAGVETTTPSKQSNK.Y         | 3 | 4.61 | 0.23 |       |
| IPI00785196 | Putative uncharacterized protein   | K.AGVETTTPSK.Q                    | 2 | 2.62 | 0.09 | -3.23 |
| IPI00785196 | Putative uncharacterized protein   | K.AGVETTTPSKQSNK.Y                | 2 | 4.14 | 0.32 |       |
| IPI00785196 | Putative uncharacterized protein   | K.AGVETTTPSKQSNKYAASSYLSLTPEQWK.S | 3 | 5.47 | 0.40 |       |
| IPI00785196 | Putative uncharacterized protein   | K.ATLVCLISDFYPGAVTVAWK.A          | 2 | 5.07 | 0.50 |       |
| IPI00785196 | Putative uncharacterized protein   | K.ATLVCLISDFYPGAVTVAWK.A          | 3 | 3.53 | 0.31 | -3.63 |
| IPI00785196 | Putative uncharacterized protein   | K.ATLVCLISDFYPGAVTVAWKADSSPVK.A   | 3 | 3.81 | 0.20 |       |
| IPI00785196 | Putative uncharacterized protein   | K.QSNNKYAASSYLSLTPEQWK.S          | 2 | 5.38 | 0.37 |       |
| IPI00785196 | Putative uncharacterized protein   | K.QSNNKYAASSYLSLTPEQWK.S          | 3 | 4.26 | 0.33 |       |
| IPI00785196 | Putative uncharacterized protein   | K.YAASSYLSLTPEQWK.S               | 1 | 3.49 | 0.43 |       |
| IPI00785196 | Putative uncharacterized protein   | K.YAASSYLSLTPEQWK.S               | 2 | 5.52 | 0.47 |       |
| IPI00785196 | Putative uncharacterized protein   | K.YAASSYLSLTPEQWK.S               | 3 | 3.44 | 0.22 |       |
| IPI00785196 | Putative uncharacterized protein   | R.SYSCQVTHEGSTVEK.T               | 1 | 3.84 | 0.43 |       |
| IPI00785196 | Putative uncharacterized protein   | R.SYSCQVTHEGSTVEK.T               | 2 | 3.17 | 0.41 | -4.10 |
| IPI00785196 | Putative uncharacterized protein   | R.SYSCQVTHEGSTVEKTVAPTECS.-       | 2 | 5.35 | 0.45 |       |
| IPI00785196 | Putative uncharacterized protein   | R.SYSCQVTHEGSTVEKTVAPTECS.-       | 3 | 2.78 | 0.26 |       |
| IPI00785200 | Putative uncharacterized protein   | K.AAPSVTLFPPSSEELQANK.A           | 1 | 4.04 | 0.50 |       |
| IPI00785200 | Putative uncharacterized protein   | K.AAPSVTLFPPSSEELQANK.A           | 2 | 3.15 | 0.34 | -1.50 |
| IPI00785200 | Putative uncharacterized protein   | K.AAPSVTLFPPSSEELQANK.A           | 3 | 3.32 | 0.13 |       |
| IPI00785200 | Putative uncharacterized protein   | K.ADSSPVKAGVETTTPSK.Q             | 1 | 3.85 | 0.37 |       |
| IPI00785200 | Putative uncharacterized protein   | K.ADSSPVKAGVETTTPSK.Q             | 2 | 3.50 | 0.38 |       |
| IPI00785200 | Putative uncharacterized protein   | K.ADSSPVKAGVETTTPSK.Q             | 3 | 3.46 | 0.35 |       |
| IPI00785200 | Putative uncharacterized protein   | K.ADSSPVKAGVETTTPSKQSNK.Y         | 2 | 5.35 | 0.42 |       |
| IPI00785200 | Putative uncharacterized protein   | K.ADSSPVKAGVETTTPSKQSNK.Y         | 3 | 4.61 | 0.23 |       |

|             |                                                                    |                                     |   |      |      |       |
|-------------|--------------------------------------------------------------------|-------------------------------------|---|------|------|-------|
| IPI00785200 | Putative uncharacterized protein                                   | K.AGVETTTPSK.Q                      | 2 | 2.62 | 0.09 | -3.23 |
| IPI00785200 | Putative uncharacterized protein                                   | K.AGVETTTPSKQSNK.Y                  | 2 | 4.14 | 0.32 |       |
| IPI00785200 | Putative uncharacterized protein                                   | K.AGVETTTPSKQSNKYAASSYLSLTPEQWK.S   | 3 | 5.47 | 0.40 |       |
| IPI00785200 | Putative uncharacterized protein                                   | K.ATLVCLISDFYPGAVTVAWK.A            | 2 | 5.07 | 0.50 |       |
| IPI00785200 | Putative uncharacterized protein                                   | K.ATLVCLISDFYPGAVTVAWK.A            | 3 | 3.53 | 0.31 | -3.63 |
| IPI00785200 | Putative uncharacterized protein                                   | K.ATLVCLISDFYPGAVTVAWKADSSPVK.A     | 3 | 3.81 | 0.20 |       |
| IPI00785200 | Putative uncharacterized protein                                   | K.QSNNKYAASSYLSLTPEQWK.S            | 2 | 5.38 | 0.37 |       |
| IPI00785200 | Putative uncharacterized protein                                   | K.QSNNKYAASSYLSLTPEQWK.S            | 3 | 4.26 | 0.33 |       |
| IPI00785200 | Putative uncharacterized protein                                   | K.SGTSASLAISGLR.S                   | 1 | 2.82 | 0.39 |       |
| IPI00785200 | Putative uncharacterized protein                                   | K.SGTSASLAISGLR.S                   | 2 | 3.92 | 0.23 |       |
| IPI00785200 | Putative uncharacterized protein                                   | K.YAASSYLSLTPEQWK.S                 | 1 | 3.49 | 0.43 |       |
| IPI00785200 | Putative uncharacterized protein                                   | K.YAASSYLSLTPEQWK.S                 | 2 | 5.52 | 0.47 |       |
| IPI00785200 | Putative uncharacterized protein                                   | K.YAASSYLSLTPEQWK.S                 | 3 | 3.44 | 0.22 |       |
| IPI00785200 | Putative uncharacterized protein                                   | R.SYSCQVTHEGSTVEK.T                 | 1 | 3.84 | 0.43 |       |
| IPI00785200 | Putative uncharacterized protein                                   | R.SYSCQVTHEGSTVEK.T                 | 2 | 3.17 | 0.41 | -4.10 |
| IPI00785200 | Putative uncharacterized protein                                   | R.SYSCQVTHEGSTVEKTVAPTECS.-         | 2 | 5.35 | 0.45 |       |
| IPI00785200 | Putative uncharacterized protein                                   | R.SYSCQVTHEGSTVEKTVAPTECS.-         | 3 | 2.78 | 0.26 |       |
| IPI00786893 | similar to LYRIC/3D3                                               | R.RNQRQMLKQQKTLHSTTEM*ELM*KESEK.-   | 3 | 2.24 | 0.17 |       |
| IPI00786937 | similar to deleted in malignant brain tumors 1 isoform b precursor | R.EDAGVVCAGIASSAHPAPLLTFLGSK.F      | 3 | 3.11 | 0.23 |       |
| IPI00786946 | similar to Tektin-3                                                | R.QNLSHLGRGSAPPLKRNLCPGGSSLGASPPR.T | 4 | 2.72 | 0.24 | -2.05 |
| IPI00787020 | similar to Dynamin-1                                               | K.AIVNKTWVDLIVGFM*PK.T              | 2 | 2.49 | 0.14 |       |
| IPI00787050 | similar to neuronal pentraxin I precursor                          | A.AETLSQLGQTLQSLK.T                 | 2 | 4.42 | 0.35 | -3.86 |
| IPI00787050 | similar to neuronal pentraxin I precursor                          | K.ALSGNVIAWAESHIEIYGGATK.W          | 2 | 4.74 | 0.46 | -2.64 |
| IPI00787050 | similar to neuronal pentraxin I precursor                          | K.ALSGNVIAWAESHIEIYGGATK.W          | 3 | 3.01 | 0.27 | -4.70 |
| IPI00787050 | similar to neuronal pentraxin I precursor                          | K.DNRPGDKFQLTFPLR.T                 | 2 | 2.45 | 0.17 | -4.00 |
| IPI00787050 | similar to neuronal pentraxin I precursor                          | K.DNRPGDKFQLTFPLR.T                 | 3 | 3.34 | 0.34 | -4.61 |
| IPI00787050 | similar to neuronal pentraxin I precursor                          | K.ETILSQKETIR.E                     | 2 | 3.37 | 0.31 | -2.36 |
| IPI00787050 | similar to neuronal pentraxin I precursor                          | K.ETILSQKETIR.E                     | 3 | 2.44 | 0.05 | -2.09 |
| IPI00787050 | similar to neuronal pentraxin I precursor                          | K.FQLTFPLR.T                        | 2 | 2.90 | 0.14 | -1.92 |
| IPI00787050 | similar to neuronal pentraxin I precursor                          | K.GQKDNRPQDKFQLTFPLR.T              | 3 | 3.94 | 0.31 | -4.72 |
| IPI00787050 | similar to neuronal pentraxin I precursor                          | K.IETALTSLHQR.I                     | 2 | 3.32 | 0.32 | -3.97 |
| IPI00787050 | similar to neuronal pentraxin I precursor                          | K.IETALTSLHQR.I                     | 3 | 2.45 | 0.28 | -4.24 |
| IPI00787050 | similar to neuronal pentraxin I precursor                          | K.LPFVINDGK.W                       | 1 | 2.64 | 0.12 | -2.43 |
| IPI00787050 | similar to neuronal pentraxin I precursor                          | K.LPFVINDGK.W                       | 2 | 2.91 | 0.19 | -1.86 |
| IPI00787050 | similar to neuronal pentraxin I precursor                          | K.LTPGEVYNLATCSTK.A                 | 2 | 4.23 | 0.44 | -4.77 |
| IPI00787050 | similar to neuronal pentraxin I precursor                          | K.SLPEN*YAFTVCM*WLK.S               | 2 | 2.32 | 0.28 | -4.87 |
| IPI00787050 | similar to neuronal pentraxin I precursor                          | K.TRLENLEQYSR.L                     | 2 | 3.95 | 0.29 | -3.37 |
| IPI00787050 | similar to neuronal pentraxin I precursor                          | K.VAKLPFVINDGK.W                    | 2 | 2.50 | 0.11 | -3.50 |
| IPI00787050 | similar to neuronal pentraxin I precursor                          | K.VAKLPFVINDGK.W                    | 3 | 3.08 | 0.17 | -3.04 |
| IPI00787050 | similar to neuronal pentraxin I precursor                          | K.WTFEACR.Q                         | 2 | 1.93 | 0.06 | -1.13 |
| IPI00787050 | similar to neuronal pentraxin I precursor                          | R.CESQSTLDPGAGEAR.A                 | 2 | 5.14 | 0.51 | -3.72 |



|             |                                                    |                                        |   |      |      |       |
|-------------|----------------------------------------------------|----------------------------------------|---|------|------|-------|
| IPI00787050 | similar to neuronal pentraxin I precursor          | R.KLTPGEVYNLATCSTK.A                   | 3 | 2.56 | 0.21 | -4.37 |
| IPI00787050 | similar to neuronal pentraxin I precursor          | R.LENLEQYSR.L                          | 1 | 2.48 | 0.15 | -3.33 |
| IPI00787050 | similar to neuronal pentraxin I precursor          | R.LENLEQYSR.L                          | 2 | 3.59 | 0.24 | -2.65 |
| IPI00787050 | similar to neuronal pentraxin I precursor          | R.TNYM*YAK.V                           | 1 | 2.12 | 0.08 | -2.16 |
| IPI00787050 | similar to neuronal pentraxin I precursor          | R.TNYM*YAK.V                           | 2 | 2.57 | 0.26 | -1.91 |
| IPI00787050 | similar to neuronal pentraxin I precursor          | R.TPAAETLSQLGQTLQSLK.T                 | 2 | 6.07 | 0.52 | -5.78 |
| IPI00787050 | similar to neuronal pentraxin I precursor          | R.TPAAETLSQLGQTLQSLK.T                 | 3 | 5.43 | 0.47 | -4.02 |
| IPI00787050 | similar to neuronal pentraxin I precursor          | R.VKIETALTSLHQR.I                      | 2 | 4.23 | 0.42 | -4.29 |
| IPI00787050 | similar to neuronal pentraxin I precursor          | R.VNTLEEGK.G                           | 2 | 2.39 | 0.09 | -2.31 |
| IPI00787050 | similar to neuronal pentraxin I precursor          | R.VNTLEEGKGGPR.N                       | 2 | 3.67 | 0.41 | -3.70 |
| IPI00787050 | similar to neuronal pentraxin I precursor          | R.VNTLEEGKGGPR.N                       | 3 | 2.03 | 0.13 | -4.23 |
| IPI00787083 | similar to peptidylprolyl isomerase A isoform 1    | K.TEWLDGK.H                            | 1 | 1.66 | 0.13 | -4.92 |
| IPI00787083 | similar to peptidylprolyl isomerase A isoform 1    | K.TEWLDGK.H                            | 2 | 2.00 | 0.21 | 1.29  |
| IPI00787265 | similar to aminopeptidase puromycin sensitive      | K.FALEVAAK.T                           | 2 | 2.03 | 0.06 | -3.15 |
| IPI00787265 | similar to aminopeptidase puromycin sensitive      | R.AQELDALDNSHPIEVSVGHPSEVDEIFDAISYSK.G | 3 | 7.18 | 0.63 | -4.80 |
| IPI00787265 | similar to aminopeptidase puromycin sensitive      | R.AQELDALDNSHPIEVSVGHPSEVDEIFDAISYSK.G | 4 | 3.87 | 0.35 | -2.04 |
| IPI00787265 | similar to aminopeptidase puromycin sensitive      | R.SKYTTPSGEVR.Y                        | 2 | 2.95 | 0.40 | -3.21 |
| IPI00787265 | similar to aminopeptidase puromycin sensitive      | R.VALSNM*NVIDR.K                       | 2 | 2.83 | 0.30 | -3.26 |
| IPI00787265 | similar to aminopeptidase puromycin sensitive      | R.YAAVTQFEATDAR.R                      | 2 | 4.86 | 0.42 | -5.28 |
| IPI00787414 | Uncharacterized protein ENSP00000381388            | R.LALSEDTEPSSSES.R                     | 2 | 3.69 | 0.47 | -3.87 |
| IPI00787781 | similar to Metalloproteinase inhibitor 2 precursor | K.AVSEKEVDSGNDIYGNIPIK.R               | 3 | 3.27 | 0.16 | -1.42 |
| IPI00787781 | similar to Metalloproteinase inhibitor 2 precursor | K.AVSEKEVDSGNDIYGNIPIK.I               | 2 | 5.53 | 0.52 | -4.58 |
| IPI00787781 | similar to Metalloproteinase inhibitor 2 precursor | K.AVSEKEVDSGNDIYGNIPIK.I               | 3 | 5.56 | 0.45 | -1.81 |
| IPI00787781 | similar to Metalloproteinase inhibitor 2 precursor | K.AVSEKEVDSGNDIYGNIPIK.I               | 4 | 2.34 | 0.15 | 1.46  |
| IPI00787781 | similar to Metalloproteinase inhibitor 2 precursor | K.DIEFIYTAPSSAVCGVSLDVGGK.K            | 2 | 2.43 | 0.18 |       |
| IPI00787781 | similar to Metalloproteinase inhibitor 2 precursor | K.EVDSGNDIYGNIPIK.I                    | 2 | 4.12 | 0.40 | -3.25 |
| IPI00787781 | similar to Metalloproteinase inhibitor 2 precursor | K.EYLIAGKAEGDGK.M                      | 2 | 3.63 | 0.28 | -0.10 |
| IPI00787781 | similar to Metalloproteinase inhibitor 2 precursor | K.KEYLIAGK.A                           | 2 | 2.18 | 0.05 | -2.73 |
| IPI00787781 | similar to Metalloproteinase inhibitor 2 precursor | K.M*FKGPEKDIEFIYTAPSSAVCGVSLDVGGK.E    | 3 | 5.76 | 0.51 | -4.29 |
| IPI00787781 | similar to Metalloproteinase inhibitor 2 precursor | K.M*FKGPEKDIEFIYTAPSSAVCGVSLDVGGK.E    | 4 | 2.82 | 0.14 | -3.24 |
| IPI00787781 | similar to Metalloproteinase inhibitor 2 precursor | K.M*HITLCDFIVPWTLSLTTQK.K              | 3 | 2.91 | 0.25 | -2.71 |
| IPI00787781 | similar to Metalloproteinase inhibitor 2 precursor | R.AKAVSEKEVDSGNDIYGNIPIK.I             | 2 | 5.57 | 0.55 | -3.01 |
| IPI00787781 | similar to Metalloproteinase inhibitor 2 precursor | R.AKAVSEKEVDSGNDIYGNIPIK.I             | 3 | 6.54 | 0.52 | -3.56 |
| IPI00787781 | similar to Metalloproteinase inhibitor 2 precursor | R.AKAVSEKEVDSGNDIYGNIPIK.I             | 4 | 4.21 | 0.47 | -2.00 |
| IPI00787781 | similar to Metalloproteinase inhibitor 2 precursor | R.GAAPPKQEFLDIEDP.-                    | 2 | 3.11 | 0.24 | -3.42 |
| IPI00787781 | similar to Metalloproteinase inhibitor 2 precursor | R.SDGSCAWYR.G                          | 2 | 2.60 | 0.32 | -1.90 |
| IPI00787781 | similar to Metalloproteinase inhibitor 2 precursor | R.YQM*GCECK.I                          | 2 | 1.96 | 0.18 |       |
| IPI00787853 | Inositol monophosphatase 3                         | F.LGGGEPGGGAAGPAAAADGGTVDLR.E          | 2 | 4.72 | 0.49 | -3.19 |
| IPI00787853 | Inositol monophosphatase 3                         | F.LGGGEPGGGAAGPAAAADGGTVDLR.E          | 3 | 4.13 | 0.28 | -4.04 |
| IPI00787853 | Inositol monophosphatase 3                         | G.LGGGEPGGGAAGPAAAADGGTVDLR.E          | 2 | 4.35 | 0.48 | -3.82 |
| IPI00787853 | Inositol monophosphatase 3                         | G.LGGGEPGGGAAGPAAAADGGTVDLR.E          | 3 | 4.33 | 0.40 | -3.35 |
| IPI00787853 | Inositol monophosphatase 3                         | K.ALGGHM*TTLSGEEISYTGSDGIEGGLLASIR.M   | 3 | 5.05 | 0.51 | -5.60 |

|             |                                               |                                                          |   |      |      |       |
|-------------|-----------------------------------------------|----------------------------------------------------------|---|------|------|-------|
| IPI00787853 | Inositol monophosphatase 3                    | K.EVPAESVTWIDPLDATQEYTEDLRK.Y                            | 3 | 3.23 | 0.37 | -5.58 |
| IPI00787853 | Inositol monophosphatase 3                    | K.EVPAESVTWIDPLDATQEYTEDLRK.Y                            | 4 | 3.10 | 0.07 | -2.68 |
| IPI00787853 | Inositol monophosphatase 3                    | K.KWDICAGNAILK.A                                         | 2 | 3.30 | 0.22 | -3.73 |
| IPI00787853 | Inositol monophosphatase 3                    | K.M* <sup>2</sup> TSGDVLSNRK.M                           | 2 | 2.03 | 0.08 | -3.18 |
| IPI00787853 | Inositol monophosphatase 3                    | K.TREGAEDKM* <sup>3</sup> TSGDVLSNR.K                    | 3 | 3.35 | 0.30 | -2.75 |
| IPI00787853 | Inositol monophosphatase 3                    | K.VLALLDVPDKSQEK.A                                       | 2 | 3.78 | 0.38 | -1.94 |
| IPI00787853 | Inositol monophosphatase 3                    | K.VLALLDVPDKSQEK.A                                       | 3 | 2.37 | 0.31 | -0.21 |
| IPI00787853 | Inositol monophosphatase 3                    | L.FGLGGEPGGGAAGPAAAADGGTVDLR.E                           | 3 | 4.25 | 0.44 | -2.85 |
| IPI00787853 | Inositol monophosphatase 3                    | R.EGAEDKM* <sup>2</sup> TSGDVLSNR.K                      | 2 | 3.69 | 0.30 | -2.33 |
| IPI00787853 | Inositol monophosphatase 3                    | R.EGAEDKM* <sup>2</sup> TSGDVLSNRK.M                     | 2 | 2.73 | 0.28 | -4.44 |
| IPI00787853 | Inositol monophosphatase 3                    | R.EM* <sup>2</sup> LAVSVLAAVR.G                          | 2 | 2.48 | 0.20 | -3.93 |
| IPI00787853 | Inositol monophosphatase 3                    | R.FSLFGLGGEPGGGAAGPAAAADGGTVDLR.E                        | 2 | 6.68 | 0.62 | -5.26 |
| IPI00787853 | Inositol monophosphatase 3                    | R.FSLFGLGGEPGGGAAGPAAAADGGTVDLR.E                        | 3 | 5.23 | 0.54 | -3.78 |
| IPI00787853 | Inositol monophosphatase 3                    | R.VRESNVLHEK.S                                           | 2 | 2.37 | 0.14 | -4.05 |
| IPI00787932 | similar to zinc finger protein 10             | R.HVRTHTGEKPYECNQCGKAFSQKTSLK.A                          | 3 | 1.74 | 0.10 | -4.38 |
| IPI00787936 | similar to cathepsin L-like protein           | K.GYVTPVK.N                                              | 1 | 1.84 | 0.17 | -0.52 |
| IPI00787936 | similar to cathepsin L-like protein           | R.EKGYVTPVK.N                                            | 1 | 2.51 | 0.13 | -2.01 |
| IPI00787936 | similar to cathepsin L-like protein           | R.EKGYVTPVK.N                                            | 2 | 1.54 | 0.32 | -1.62 |
| IPI00788189 | similar to Fc fragment of IgG binding protein | D.PHYHSFDGR.K                                            | 1 | 2.52 | 0.26 | -5.29 |
| IPI00788189 | similar to Fc fragment of IgG binding protein | D.PHYHSFDGR.K                                            | 2 | 3.08 | 0.36 | -4.21 |
| IPI00788189 | similar to Fc fragment of IgG binding protein | D.PHYTTFDGR.R                                            | 1 | 2.84 | 0.07 | -2.22 |
| IPI00788189 | similar to Fc fragment of IgG binding protein | D.PHYVTLDGHR.F                                           | 1 | 2.80 | 0.30 | -5.14 |
| IPI00788189 | similar to Fc fragment of IgG binding protein | K.AGCVAESTAVCR.A                                         | 2 | 3.86 | 0.45 | -2.72 |
| IPI00788189 | similar to Fc fragment of IgG binding protein | K.AIGYATAADCGR.T                                         | 2 | 3.69 | 0.46 | -3.97 |
| IPI00788189 | similar to Fc fragment of IgG binding protein | K.AISGLTIDGHAVGAK.L                                      | 2 | 4.69 | 0.40 | -1.31 |
| IPI00788189 | similar to Fc fragment of IgG binding protein | K.ALASYVAACQAAGVVIEDWR.A                                 | 2 | 5.36 | 0.47 | -4.22 |
| IPI00788189 | similar to Fc fragment of IgG binding protein | K.ALASYVAACQAAGVVIEDWR.A                                 | 3 | 4.87 | 0.43 | -3.72 |
| IPI00788189 | similar to Fc fragment of IgG binding protein | K.FYPAGDVLR.V                                            | 1 | 1.92 | 0.23 | -2.57 |
| IPI00788189 | similar to Fc fragment of IgG binding protein | K.FYPAGDVLR.V                                            | 2 | 2.46 | 0.26 | -2.49 |
| IPI00788189 | similar to Fc fragment of IgG binding protein | K.GCVLDVCM* <sup>3</sup> GGGDRDILCK.A                    | 3 | 2.63 | 0.27 | -2.62 |
| IPI00788189 | similar to Fc fragment of IgG binding protein | K.LASVSVSR.T                                             | 2 | 2.24 | 0.17 | -3.62 |
| IPI00788189 | similar to Fc fragment of IgG binding protein | K.LDDGYLCEGDCQNNCPACTPGQAQHYEGDRLCGM* <sup>4</sup> LTK.L | 4 | 4.91 | 0.50 | -0.45 |
| IPI00788189 | similar to Fc fragment of IgG binding protein | K.LDGPFAVCHDTLDPRPFLEQCQVYDLCVVGGER.L                    | 3 | 1.82 | 0.12 | -3.65 |
| IPI00788189 | similar to Fc fragment of IgG binding protein | K.LDGPFAVCHDTLDPRPFLEQCQVYDLCVVGGER.L                    | 4 | 3.99 | 0.26 | -3.05 |
| IPI00788189 | similar to Fc fragment of IgG binding protein | K.LDPQGA VR.D                                            | 2 | 1.90 | 0.10 | -3.35 |
| IPI00788189 | similar to Fc fragment of IgG binding protein | K.LDSLVAQQLQSK.N                                         | 2 | 3.50 | 0.26 | -4.29 |
| IPI00788189 | similar to Fc fragment of IgG binding protein | K.LPVVLANGQIR.A                                          | 1 | 2.28 | 0.09 | -1.70 |
| IPI00788189 | similar to Fc fragment of IgG binding protein | K.LPVVLANGQIR.A                                          | 2 | 3.78 | 0.35 | -2.61 |
| IPI00788189 | similar to Fc fragment of IgG binding protein | K.LTYNHGGITGSR.G                                         | 1 | 3.19 | 0.37 | -3.73 |
| IPI00788189 | similar to Fc fragment of IgG binding protein | K.LTYNHGGITGSR.G                                         | 2 | 3.58 | 0.52 | -3.51 |
| IPI00788189 | similar to Fc fragment of IgG binding protein | K.LTYNHGGITGSR.G                                         | 3 | 1.83 | 0.15 | -2.76 |
| IPI00788189 | similar to Fc fragment of IgG binding protein | K.NAAGDLQR.L                                             | 2 | 2.16 | 0.16 | -2.98 |

|             |                                               |                                        |   |      |      |       |
|-------------|-----------------------------------------------|----------------------------------------|---|------|------|-------|
| IPI00788189 | similar to Fc fragment of IgG binding protein | K.NTGREEFLTAFLQNYQLAY.S                | 2 | 3.70 | 0.51 | -3.20 |
| IPI00788189 | similar to Fc fragment of IgG binding protein | K.NTGREEFLTAFLQNYQLAYSK.A              | 2 | 4.99 | 0.52 | -4.18 |
| IPI00788189 | similar to Fc fragment of IgG binding protein | K.NTGREEFLTAFLQNYQLAYSK.A              | 3 | 3.74 | 0.32 | -4.69 |
| IPI00788189 | similar to Fc fragment of IgG binding protein | K.VAVIVSNDHAGK.L                       | 1 | 2.90 | 0.38 | -2.70 |
| IPI00788189 | similar to Fc fragment of IgG binding protein | K.VAVIVSNDHAGK.L                       | 2 | 3.44 | 0.33 | -2.47 |
| IPI00788189 | similar to Fc fragment of IgG binding protein | K.VAVIVSNDHAGK.L                       | 3 | 2.45 | 0.09 | -2.15 |
| IPI00788189 | similar to Fc fragment of IgG binding protein | K.VPSSYAEALCGLCGNFNGDPADDLALR.G        | 3 | 5.15 | 0.54 | -6.97 |
| IPI00788189 | similar to Fc fragment of IgG binding protein | K.VRVNGVLTALPVSVDGR.I                  | 2 | 1.88 | 0.15 | -2.56 |
| IPI00788189 | similar to Fc fragment of IgG binding protein | K.VRVNGVLTALPVSVDGR.I                  | 3 | 2.47 | 0.16 | -6.20 |
| IPI00788189 | similar to Fc fragment of IgG binding protein | K.VTVNGVDM*K.L                         | 1 | 2.34 | 0.15 | -4.25 |
| IPI00788189 | similar to Fc fragment of IgG binding protein | K.VTVNGVDM*K.L                         | 2 | 3.19 | 0.29 | -3.21 |
| IPI00788189 | similar to Fc fragment of IgG binding protein | K.VTVNGVDM*KLPVVLANGQIR.A              | 3 | 3.95 | 0.38 | -2.80 |
| IPI00788189 | similar to Fc fragment of IgG binding protein | K.YQKEEFCGLLSSPTGPLSSCHK.L             | 3 | 5.01 | 0.21 |       |
| IPI00788189 | similar to Fc fragment of IgG binding protein | N.PAVSYVR.V                            | 1 | 1.87 | 0.22 | 0.95  |
| IPI00788189 | similar to Fc fragment of IgG binding protein | P.GWDPLCWDECR.G                        | 2 | 3.31 | 0.27 | -3.30 |
| IPI00788189 | similar to Fc fragment of IgG binding protein | R.APGWDPLCWDECR.G                      | 2 | 3.78 | 0.54 | -3.91 |
| IPI00788189 | similar to Fc fragment of IgG binding protein | R.ASQHGSDDVVIETDFGLR.V                 | 2 | 4.82 | 0.58 | -3.61 |
| IPI00788189 | similar to Fc fragment of IgG binding protein | R.ASQHGSDDVVIETDFGLR.V                 | 3 | 4.18 | 0.36 | -4.62 |
| IPI00788189 | similar to Fc fragment of IgG binding protein | R.AYSHSVSLTR.G                         | 1 | 2.60 | 0.30 | -4.38 |
| IPI00788189 | similar to Fc fragment of IgG binding protein | R.AYSHSVSLTR.G                         | 2 | 2.53 | 0.23 | -3.65 |
| IPI00788189 | similar to Fc fragment of IgG binding protein | R.CLANGGIHYITLDGR.V                    | 2 | 3.76 | 0.39 | -4.29 |
| IPI00788189 | similar to Fc fragment of IgG binding protein | R.CLANGGIHYITLDGR.V                    | 3 | 3.44 | 0.30 | -2.83 |
| IPI00788189 | similar to Fc fragment of IgG binding protein | R.CPGLQNTIPWYR.V                       | 2 | 4.01 | 0.41 | -2.47 |
| IPI00788189 | similar to Fc fragment of IgG binding protein | R.CSCSSSSGLTCQAAGCPPGR.V               | 2 | 5.38 | 0.64 | -2.58 |
| IPI00788189 | similar to Fc fragment of IgG binding protein | R.EYPGQVLVDDVLQYLPFQAADGQVQVFR.Q       | 3 | 6.98 | 0.56 | -4.69 |
| IPI00788189 | similar to Fc fragment of IgG binding protein | R.FAVLQENVAWGNGR.V                     | 2 | 4.53 | 0.35 | 0.42  |
| IPI00788189 | similar to Fc fragment of IgG binding protein | R.GATTSPGVYELSSR.C                     | 2 | 3.45 | 0.40 | -4.29 |
| IPI00788189 | similar to Fc fragment of IgG binding protein | R.GATTSPGVYELSSR.C                     | 3 | 2.73 | 0.17 | -3.18 |
| IPI00788189 | similar to Fc fragment of IgG binding protein | R.GEVGFVLVDNQR.S                       | 2 | 3.08 | 0.28 | 2.04  |
| IPI00788189 | similar to Fc fragment of IgG binding protein | R.GNPAVSYVR.V                          | 1 | 2.11 | 0.28 | -1.80 |
| IPI00788189 | similar to Fc fragment of IgG binding protein | R.GNPAVSYVR.V                          | 2 | 3.20 | 0.42 | -0.25 |
| IPI00788189 | similar to Fc fragment of IgG binding protein | R.GSQAVSYTR.S                          | 1 | 2.35 | 0.35 | -0.74 |
| IPI00788189 | similar to Fc fragment of IgG binding protein | R.GSQAVSYTR.S                          | 2 | 3.49 | 0.27 | -1.61 |
| IPI00788189 | similar to Fc fragment of IgG binding protein | R.GSQTVSYTR.A                          | 1 | 1.78 | 0.21 | -0.51 |
| IPI00788189 | similar to Fc fragment of IgG binding protein | R.GSQTVSYTR.A                          | 2 | 2.10 | 0.18 | 1.69  |
| IPI00788189 | similar to Fc fragment of IgG binding protein | R.ISVAQGASK.A                          | 1 | 1.85 | 0.21 | -2.50 |
| IPI00788189 | similar to Fc fragment of IgG binding protein | R.ISVAQGASK.A                          | 2 | 2.63 | 0.25 | -3.51 |
| IPI00788189 | similar to Fc fragment of IgG binding protein | R.KDFDQGTTCNYVLATTGCPGVSTQGLTPFTVTTK.N | 3 | 6.10 | 0.41 |       |
| IPI00788189 | similar to Fc fragment of IgG binding protein | R.LLFDGDAHLLM*SIPSPFR.G                | 2 | 4.63 | 0.52 | -4.30 |
| IPI00788189 | similar to Fc fragment of IgG binding protein | R.LLISLSESPASVSILSQADNTSK.K            | 2 | 5.09 | 0.59 | -4.13 |
| IPI00788189 | similar to Fc fragment of IgG binding protein | R.LLISLSESPASVSILSQADNTSK.K            | 3 | 3.34 | 0.24 | -4.04 |
| IPI00788189 | similar to Fc fragment of IgG binding protein | R.LLISLSESPASVSILSQADNTSKK.V           | 3 | 3.86 | 0.48 | -2.96 |

|             |                                               |                                      |   |      |      |       |
|-------------|-----------------------------------------------|--------------------------------------|---|------|------|-------|
| IPI00788189 | similar to Fc fragment of IgG binding protein | R.LPVSLSEGR.L                        | 2 | 2.71 | 0.25 | -1.42 |
| IPI00788189 | similar to Fc fragment of IgG binding protein | R.NEVTYDPYLVLPDVAAYCPAYVVK.S         | 2 | 4.40 | 0.39 | -5.34 |
| IPI00788189 | similar to Fc fragment of IgG binding protein | R.NEVTYDPYLVLPDVAAYCPAYVVK.S         | 3 | 6.03 | 0.49 | -5.86 |
| IPI00788189 | similar to Fc fragment of IgG binding protein | R.REYPGQVLVDDVLQYLPFQAADGQVQVFR.Q    | 3 | 6.84 | 0.54 | -4.66 |
| IPI00788189 | similar to Fc fragment of IgG binding protein | R.RVSYVGLVTVR.A                      | 2 | 2.97 | 0.29 | -3.49 |
| IPI00788189 | similar to Fc fragment of IgG binding protein | R.RVSYVGLVTVR.A                      | 3 | 3.43 | 0.23 | -4.14 |
| IPI00788189 | similar to Fc fragment of IgG binding protein | R.SLAAYTAACQAAGVAVKPWR.T             | 3 | 3.94 | 0.42 | -4.87 |
| IPI00788189 | similar to Fc fragment of IgG binding protein | R.SPANCPLSCPANSR.Y                   | 2 | 3.82 | 0.39 | -2.28 |
| IPI00788189 | similar to Fc fragment of IgG binding protein | R.SRLPVSLSEGR.L                      | 2 | 2.61 | 0.28 | -2.79 |
| IPI00788189 | similar to Fc fragment of IgG binding protein | R.TCQGSCAALSGLTGCTTR.C               | 2 | 5.43 | 0.51 | -2.68 |
| IPI00788189 | similar to Fc fragment of IgG binding protein | R.TPDGSELLV.R.Q                      | 2 | 3.29 | 0.28 | -3.89 |
| IPI00788189 | similar to Fc fragment of IgG binding protein | R.VAYDLVYYVR.V                       | 1 | 2.84 | 0.34 | -2.79 |
| IPI00788189 | similar to Fc fragment of IgG binding protein | R.VAYDLVYYVR.V                       | 2 | 3.81 | 0.27 | -3.57 |
| IPI00788189 | similar to Fc fragment of IgG binding protein | R.VDLPAEK.L                          | 1 | 1.43 | 0.08 | -3.43 |
| IPI00788189 | similar to Fc fragment of IgG binding protein | R.VDVTLPSSYHGAVCGLCGNM*DR.N          | 3 | 2.52 | 0.21 | -2.53 |
| IPI00788189 | similar to Fc fragment of IgG binding protein | R.VLVENEHRGSQTVSYTR.A                | 2 | 3.33 | 0.33 | -4.62 |
| IPI00788189 | similar to Fc fragment of IgG binding protein | R.VLVENEHRGSQTVSYTR.A                | 3 | 3.64 | 0.47 | -3.69 |
| IPI00788189 | similar to Fc fragment of IgG binding protein | R.VLVENEHRGSQTVSYTR.A                | 4 | 2.67 | 0.10 | -2.14 |
| IPI00788189 | similar to Fc fragment of IgG binding protein | R.VNGVLTALPVSVADGR.I                 | 2 | 5.00 | 0.42 | -3.17 |
| IPI00788189 | similar to Fc fragment of IgG binding protein | R.VPAAYAASLCGLCGNYNQDPADDLK.A        | 3 | 5.58 | 0.37 | -4.10 |
| IPI00788189 | similar to Fc fragment of IgG binding protein | R.VSYVGLVTVR.A                       | 2 | 4.07 | 0.39 | -1.13 |
| IPI00788189 | similar to Fc fragment of IgG binding protein | R.VTAKVPSSYAEALCGLCGNFNGDPADDLALR.G  | 3 | 6.93 | 0.64 | -3.07 |
| IPI00788189 | similar to Fc fragment of IgG binding protein | R.VTLQPYNVAQLQSSVDLSGSK.V            | 2 | 5.67 | 0.60 | -4.75 |
| IPI00788189 | similar to Fc fragment of IgG binding protein | R.VTLQPYNVAQLQSSVDLSGSK.V            | 3 | 6.34 | 0.59 | -5.41 |
| IPI00788189 | similar to Fc fragment of IgG binding protein | R.VVTVAALGTNISIHKDEIGK.V             | 3 | 2.88 | 0.27 | -3.75 |
| IPI00788189 | similar to Fc fragment of IgG binding protein | R.VVTVAALGTNISIHKDEIGK.V             | 4 | 2.65 | 0.33 | -2.84 |
| IPI00788189 | similar to Fc fragment of IgG binding protein | R.VVTVAALGTNISIHKDEIGKVR.V           | 3 | 3.69 | 0.47 | -4.24 |
| IPI00788189 | similar to Fc fragment of IgG binding protein | R.VYDLHGSCSYVLAQVCHPKPGDEDFSIIVLEK.N | 4 | 4.79 | 0.35 | -3.98 |
| IPI00788189 | similar to Fc fragment of IgG binding protein | R.YDLAFVVASQATK.L                    | 2 | 4.46 | 0.50 | -3.69 |
| IPI00788189 | similar to Fc fragment of IgG binding protein | R.YDLAFVVASQATK.L                    | 3 | 4.46 | 0.29 | -2.18 |
| IPI00788189 | similar to Fc fragment of IgG binding protein | R.YYPLGEVFPYGPPECER.R                | 2 | 5.02 | 0.61 | -3.09 |
| IPI00788258 | similar to lysyl oxidase-like 1 preproprotein | R.EVAVGDSTGM*AR.A                    | 2 | 3.39 | 0.45 | -2.37 |
| IPI00788258 | similar to lysyl oxidase-like 1 preproprotein | R.VLLAGAPQAQQR.R                     | 2 | 3.51 | 0.38 | -1.65 |
| IPI00788786 | 309 kDa protein                               | K.LSGEAYGFVAR.I                      | 2 | 3.76 | 0.38 | -2.00 |
| IPI00788786 | 309 kDa protein                               | K.LSPVYAGK.T                         | 1 | 1.84 | 0.08 | -1.81 |
| IPI00788786 | 309 kDa protein                               | K.YAGSQVASTSEVLK.Y                   | 2 | 3.58 | 0.34 | -2.98 |
| IPI00788786 | 309 kDa protein                               | K.YTLFQIFSK.I                        | 2 | 2.74 | 0.29 | -1.99 |
| IPI00788786 | 309 kDa protein                               | R.DCNTCICR.N                         | 2 | 2.60 | 0.24 | -2.23 |
| IPI00788786 | 309 kDa protein                               | R.IQHTVTASVR.L                       | 2 | 1.71 | 0.06 | -1.11 |
| IPI00788786 | 309 kDa protein                               | R.LPGLHNSLVK.L                       | 2 | 2.03 | 0.17 | -2.30 |
| IPI00788786 | 309 kDa protein                               | R.SFSIIGDFQNGKR.V                    | 2 | 3.02 | 0.24 | -2.82 |
| IPI00788786 | 309 kDa protein                               | R.SFSIIGDFQNGKR.V                    | 3 | 2.33 | 0.22 | -1.93 |

|             |                                                |                                     |   |      |      |       |
|-------------|------------------------------------------------|-------------------------------------|---|------|------|-------|
| IPI00788786 | 309 kDa protein                                | R.VSM*PYASK.G                       | 2 | 2.29 | 0.16 | -4.35 |
| IPI00788824 | Light chain Fab                                | K.LLIYSNNQRPSGVPDR.F                | 2 | 2.62 | 0.12 |       |
| IPI00788824 | Light chain Fab                                | K.LLIYSNNQRPSGVPDRFSGSK.S           | 3 | 4.14 | 0.29 |       |
| IPI00788824 | Light chain Fab                                | R.VTISCSGSSSNIGSNTVNWYQQLPGTAPK.L   | 3 | 5.12 | 0.36 |       |
| IPI00788835 | 25 kDa protein                                 | A.EEDDSLANSDDLK.E                   | 2 | 4.90 | 0.39 | -1.97 |
| IPI00788835 | 25 kDa protein                                 | D.AEEDDSLANSDDLK.E                  | 2 | 6.33 | 0.48 | -4.00 |
| IPI00788835 | 25 kDa protein                                 | D.AEEDDSLANSDDLKELLETDGDNR.E        | 2 | 5.00 | 0.52 | -2.99 |
| IPI00788835 | 25 kDa protein                                 | D.AEEDDSLANSDDLKELLETDGDNR.E        | 3 | 5.58 | 0.52 | -4.56 |
| IPI00788835 | 25 kDa protein                                 | D.AEEDDSLANSDDLKELLETDGDNRER.S      | 3 | 5.56 | 0.49 | -4.29 |
| IPI00788835 | 25 kDa protein                                 | E.DDSLANSDDLK.E                     | 2 | 3.65 | 0.31 | -3.02 |
| IPI00788835 | 25 kDa protein                                 | E.EDDSLANSDDLK.E                    | 2 | 4.34 | 0.40 | -4.10 |
| IPI00788835 | 25 kDa protein                                 | E.LYPM*EPEEEANGSEILAK.R             | 2 | 4.65 | 0.46 | -4.75 |
| IPI00788835 | 25 kDa protein                                 | K.DAEEDDSLANSDDLK.E                 | 2 | 6.38 | 0.47 | -4.28 |
| IPI00788835 | 25 kDa protein                                 | K.DAEEDDSLANSDDLK.E                 | 3 | 3.48 | 0.07 | 0.38  |
| IPI00788835 | 25 kDa protein                                 | K.DAEEDDSLANSDDLKELLETDGDNR.E       | 2 | 4.56 | 0.51 | -4.41 |
| IPI00788835 | 25 kDa protein                                 | K.DAEEDDSLANSDDLKELLETDGDNR.E       | 3 | 5.50 | 0.52 | -5.37 |
| IPI00788835 | 25 kDa protein                                 | K.DAEEDDSLANSDDLKELLETDGDNRE.R      | 3 | 4.03 | 0.46 | -8.02 |
| IPI00788835 | 25 kDa protein                                 | K.DAEEDDSLANSDDLKELLETDGDNRER.S     | 2 | 2.50 | 0.23 | -3.66 |
| IPI00788835 | 25 kDa protein                                 | K.DAEEDDSLANSDDLKELLETDGDNRER.S     | 3 | 7.29 | 0.52 | -6.76 |
| IPI00788835 | 25 kDa protein                                 | K.DAEEDDSLANSDDLKELLETDGDNRER.S     | 4 | 3.57 | 0.36 | -4.50 |
| IPI00788835 | 25 kDa protein                                 | K.ELLETDGDNR.E                      | 1 | 1.92 | 0.09 | -3.74 |
| IPI00788835 | 25 kDa protein                                 | K.ELLQLSKPELPQDGTST.L               | 2 | 3.42 | 0.40 | -2.86 |
| IPI00788835 | 25 kDa protein                                 | K.ELLQLSKPELPQDGTSTLR.E             | 2 | 4.29 | 0.46 | -4.30 |
| IPI00788835 | 25 kDa protein                                 | K.ELLQLSKPELPQDGTSTLR.E             | 3 | 4.81 | 0.44 | -3.78 |
| IPI00788835 | 25 kDa protein                                 | K.ELLQLSKPELPQDGTSTLRENSKPEESHLL.A  | 3 | 4.96 | 0.48 | -3.73 |
| IPI00788835 | 25 kDa protein                                 | K.ELLQLSKPELPQDGTSTLRENSKPEESHLLA.K | 3 | 4.89 | 0.43 | -3.81 |
| IPI00788835 | 25 kDa protein                                 | K.ELLQLSKPELPQDGTSTLRENSKPEESHLLA.K | 4 | 5.23 | 0.41 | -2.89 |
| IPI00788835 | 25 kDa protein                                 | K.IWETCKELLQLSKPELPQDGTSTLR.E       | 3 | 5.01 | 0.49 | -2.97 |
| IPI00788835 | 25 kDa protein                                 | K.IWETCKELLQLSKPELPQDGTSTLR.E       | 4 | 3.38 | 0.22 | -3.91 |
| IPI00788835 | 25 kDa protein                                 | K.KDAEEDDSLANSDDLK.E                | 2 | 5.64 | 0.45 | -2.61 |
| IPI00788835 | 25 kDa protein                                 | K.KDAEEDDSLANSDDLKELLETDGDNR.E      | 3 | 5.78 | 0.54 | -3.53 |
| IPI00788835 | 25 kDa protein                                 | K.KDAEEDDSLANSDDLKELLETDGDNR.E      | 4 | 3.02 | 0.14 | -2.50 |
| IPI00788835 | 25 kDa protein                                 | K.KDAEEDDSLANSDDLKELLETDGDNRER.S    | 4 | 5.14 | 0.44 | -4.13 |
| IPI00788835 | 25 kDa protein                                 | K.KDAEEDDSLANSDDLKELLETDGDNRER.S    | 5 | 3.70 | 0.24 | -2.86 |
| IPI00788835 | 25 kDa protein                                 | K.KM*DELYPM*EPEEEANGSEILAK.R        | 3 | 3.73 | 0.34 | -1.62 |
| IPI00788835 | 25 kDa protein                                 | R.ENSKPEESHLLA.K                    | 2 | 3.02 | 0.30 | -2.68 |
| IPI00788835 | 25 kDa protein                                 | R.FAEALPSDEEGESYSK.E                | 2 | 4.23 | 0.42 | -4.07 |
| IPI00788835 | 25 kDa protein                                 | R.FAEALPSDEEGESYSKEVPEM*E.K         | 2 | 4.49 | 0.59 | -3.18 |
| IPI00789181 | 115 kDa protein                                | K.TVSFSSMPSEK.K                     | 2 | 2.44 | 0.11 |       |
| IPI00789234 | Immunoglobulin V-set domain containing protein | K.QSPQSGM*ETHFEPFILPLTNAPQK.G       | 3 | 4.56 | 0.28 | -4.12 |
| IPI00789234 | Immunoglobulin V-set domain containing protein | K.VQGNDSHKLQISK.V                   | 2 | 4.48 | 0.38 | -4.59 |
| IPI00789234 | Immunoglobulin V-set domain containing protein | R.GPEDLDPGAEGAGAQUELLPDRDPDSGDK.I   | 2 | 2.26 | 0.45 | -4.31 |

|             |                                                                  |                                               |   |      |      |       |
|-------------|------------------------------------------------------------------|-----------------------------------------------|---|------|------|-------|
| IPI00789234 | Immunoglobulin V-set domain containing protein                   | R.GPEDLDPGAEGAGAQVELLPDRDPDSDGK.I             | 3 | 4.94 | 0.58 | -5.00 |
| IPI00789234 | Immunoglobulin V-set domain containing protein                   | R.GPEDLDPGAEGAGAQVELLPDRDPDSDGK.I             | 4 | 3.82 | 0.23 | -3.52 |
| IPI00789234 | Immunoglobulin V-set domain containing protein                   | R.GPEDLDPGAEGAGAQVELLPDRDPDSDGTKISTVK.V       | 3 | 4.46 | 0.44 | -4.38 |
| IPI00789234 | Immunoglobulin V-set domain containing protein                   | R.GPEDLDPGAEGAGAQVELLPDRDPDSDGTKISTVK.V       | 4 | 3.77 | 0.40 | 2.10  |
| IPI00789234 | Immunoglobulin V-set domain containing protein                   | R.THSTSSPQVVAK.I                              | 2 | 2.24 | 0.19 | -2.94 |
| IPI00789234 | Immunoglobulin V-set domain containing protein                   | R.VTDANYGELQEHK.A                             | 1 | 2.46 | 0.34 | -0.73 |
| IPI00789234 | Immunoglobulin V-set domain containing protein                   | R.VTDANYGELQEHK.A                             | 2 | 4.75 | 0.47 | -2.77 |
| IPI00789234 | Immunoglobulin V-set domain containing protein                   | R.VTDANYGELQEHK.A                             | 3 | 2.39 | 0.30 | -0.09 |
| IPI00789234 | Immunoglobulin V-set domain containing protein                   | R.VTDANYGELQEHKQAQAYLK.V                      | 2 | 4.49 | 0.48 | -5.18 |
| IPI00789234 | Immunoglobulin V-set domain containing protein                   | R.VTDANYGELQEHKQAQAYLK.V                      | 3 | 2.52 | 0.19 | -3.38 |
| IPI00789245 | Isoform 2 of Probable organic cation transporter protein C6orf85 | R.CGGLGLVLASAGFGM*LTAPIELHNQK.G               | 3 | 3.03 | 0.11 |       |
| IPI00789259 | V1-13 protein (Fragment)                                         | K.LLIYGNRNPSGVPDRFSGSK.S                      | 3 | 3.39 | 0.15 |       |
| IPI00789259 | V1-13 protein (Fragment)                                         | R.VTISCTGSSSNIGAGYDVHWYQQLPGTAPK.L            | 3 | 4.30 | 0.45 |       |
| IPI00789398 | Isoform 3 of Lymphocyte antigen 75 precursor                     | K.VESIEDVR.N                                  | 2 | 2.50 | 0.06 | -2.88 |
| IPI00789477 | Similar to Lactotransferrin precursor                            | K.GEADAM*SLDGGYVYTAGK.C                       | 2 | 4.21 | 0.35 |       |
| IPI00789477 | Similar to Lactotransferrin precursor                            | K.LADFALLCLDGK.R                              | 2 | 3.58 | 0.33 |       |
| IPI00789477 | Similar to Lactotransferrin precursor                            | R.ADAVTLDGGFIYEAGLAPYK.L                      | 2 | 4.43 | 0.52 | -5.19 |
| IPI00789847 | Protein                                                          | K.DLVILLYETALLSSGFSLEDPQTHANR.I               | 3 | 4.19 | 0.35 | -4.83 |
| IPI00789847 | Protein                                                          | K.DLVILLYETALLSSGFSLEDPQTHANR.I               | 4 | 2.73 | 0.11 | -2.09 |
| IPI00789847 | Protein                                                          | K.DQVANSAFVER.L                               | 2 | 3.34 | 0.38 | -3.52 |
| IPI00789847 | Protein                                                          | K.HIYYITGETK.D                                | 2 | 2.70 | 0.32 | 0.78  |
| IPI00789847 | Protein                                                          | K.YIDQEELNK.T                                 | 2 | 3.04 | 0.15 | -2.82 |
| IPI00789847 | Protein                                                          | R.DNSTM*GYM*AAK.K                             | 2 | 2.80 | 0.40 | -3.64 |
| IPI00789847 | Protein                                                          | R.NPDDITNEEYGEFYK.S                           | 2 | 5.48 | 0.47 | -5.15 |
| IPI00789954 | 7 kDa protein                                                    | K.CDEWSVNSVGK.I                               | 2 | 3.09 | 0.18 |       |
| IPI00789954 | 7 kDa protein                                                    | K.M*YLGYEYVTAIR.N                             | 2 | 3.62 | 0.43 | -3.23 |
| IPI00789954 | 7 kDa protein                                                    | K.M*YLGYEYVTAIR.N                             | 3 | 4.11 | 0.27 |       |
| IPI00789954 | 7 kDa protein                                                    | K.MYLGYEYVTAIR.N                              | 1 | 2.50 | 0.33 |       |
| IPI00789954 | 7 kDa protein                                                    | K.MYLGYEYVTAIR.N                              | 2 | 4.77 | 0.51 |       |
| IPI00789954 | 7 kDa protein                                                    | K.MYLGYEYVTAIR.N                              | 3 | 4.25 | 0.21 |       |
| IPI00789954 | 7 kDa protein                                                    | R.EGTCPEAPTDECKPVK.W                          | 1 | 2.79 | 0.34 |       |
| IPI00789954 | 7 kDa protein                                                    | R.EGTCPEAPTDECKPVK.W                          | 2 | 3.97 | 0.30 |       |
| IPI00789954 | 7 kDa protein                                                    | R.LKCDEWSVNSVGK.I                             | 1 | 3.40 | 0.33 |       |
| IPI00789954 | 7 kDa protein                                                    | R.LKCDEWSVNSVGK.I                             | 2 | 4.83 | 0.34 |       |
| IPI00789954 | 7 kDa protein                                                    | R.LKCDEWSVNSVGK.I                             | 3 | 4.71 | 0.27 |       |
| IPI00789954 | 7 kDa protein                                                    | R.NLREGTCPEAPTDECKPVK.W                       | 2 | 5.48 | 0.41 |       |
| IPI00789954 | 7 kDa protein                                                    | R.NLREGTCPEAPTDECKPVK.W                       | 3 | 5.92 | 0.32 |       |
| IPI00790021 | Zinc finger protein 652                                          | K.KRATKEPKAPVQK.A                             | 2 | 2.58 | 0.11 |       |
| IPI00790122 | 27 kDa protein                                                   | R.ASLSAQQEPAQEELVAEEDQDPSELNPQTEESQDPAPFLNR.L | 3 | 4.46 | 0.58 | -0.91 |
| IPI00790473 | 12 kDa protein                                                   | A.AAVSNFGYDLYR.V                              | 1 | 2.42 | 0.40 | -3.47 |
| IPI00790473 | 12 kDa protein                                                   | A.AAVSNFGYDLYR.V                              | 2 | 4.00 | 0.43 | -3.38 |

|             |                                                                                  |                                      |   |      |      |       |
|-------------|----------------------------------------------------------------------------------|--------------------------------------|---|------|------|-------|
| IPI00790473 | 12 kDa protein                                                                   | A.SPPEEGSPDPDSTGALVEEEDPFFKVPVVK.L   | 3 | 4.23 | 0.51 | -1.07 |
| IPI00790473 | 12 kDa protein                                                                   | D.PDSTGALVEEEDPFFKVPVVK.L            | 3 | 4.36 | 0.44 | -1.31 |
| IPI00790473 | 12 kDa protein                                                                   | D.PFFKVPVVK.L                        | 2 | 2.93 | 0.16 | -0.63 |
| IPI00790473 | 12 kDa protein                                                                   | K.LAAAVSNFGYDL.Y                     | 1 | 2.36 | 0.22 | -2.21 |
| IPI00790473 | 12 kDa protein                                                                   | K.LAAAVSNFGYDLYR.V                   | 1 | 3.35 | 0.57 | -2.78 |
| IPI00790473 | 12 kDa protein                                                                   | K.LAAAVSNFGYDLYR.V                   | 2 | 4.82 | 0.57 | -8.47 |
| IPI00790473 | 12 kDa protein                                                                   | K.LAAAVSNFGYDLYR.V                   | 3 | 5.53 | 0.53 | -1.91 |
| IPI00790473 | 12 kDa protein                                                                   | N.PASPPEEGSPDPDSTGALVEEEDPFFKVPVVK.L | 3 | 4.68 | 0.58 | -3.44 |
| IPI00790473 | 12 kDa protein                                                                   | S.PPEEGSPDPDSTGALVEEEDPFFKVPVVK.L    | 2 | 3.82 | 0.42 | 0.03  |
| IPI00790473 | 12 kDa protein                                                                   | S.PPEEGSPDPDSTGALVEEEDPFFKVPVVK.L    | 3 | 6.12 | 0.49 | -2.05 |
| IPI00790473 | 12 kDa protein                                                                   | V.SNFGYDLYR.V                        | 1 | 1.82 | 0.17 | -2.40 |
| IPI00790775 | Isoform 3 of Voltage-dependent calcium channel subunit alpha-2/delta-3 precursor | K.GILLGVVGTDVPVKELLK.T               | 2 | 3.77 | 0.29 | -2.80 |
| IPI00790775 | Isoform 3 of Voltage-dependent calcium channel subunit alpha-2/delta-3 precursor | K.GILLGVVGTDVPVKELLK.T               | 3 | 2.97 | 0.39 | -3.73 |
| IPI00790775 | Isoform 3 of Voltage-dependent calcium channel subunit alpha-2/delta-3 precursor | K.VFVDNFRDPSLIWQYFGSAK.G             | 2 | 3.78 | 0.49 | -3.46 |
| IPI00790775 | Isoform 3 of Voltage-dependent calcium channel subunit alpha-2/delta-3 precursor | K.VFVDNFRDPSLIWQYFGSAK.G             | 3 | 4.48 | 0.30 | -4.26 |
| IPI00790775 | Isoform 3 of Voltage-dependent calcium channel subunit alpha-2/delta-3 precursor | R.EHLDKLF.K                          | 2 | 1.96 | 0.13 | -2.84 |
| IPI00790775 | Isoform 3 of Voltage-dependent calcium channel subunit alpha-2/delta-3 precursor | R.IFTYLIGR.E                         | 2 | 2.96 | 0.22 | -1.51 |
| IPI00790775 | Isoform 3 of Voltage-dependent calcium channel subunit alpha-2/delta-3 precursor | R.SKGILLGVVGTDVPVKELLK.T             | 3 | 3.46 | 0.35 | -4.80 |
| IPI00790899 | 55 kDa protein                                                                   | K.AKM*DAEQDPNVQVDHLNLLK.Q            | 3 | 2.91 | 0.22 | -3.05 |
| IPI00790899 | 55 kDa protein                                                                   | K.APAAHPEGQLK.F                      | 1 | 2.46 | 0.30 | -3.83 |
| IPI00790899 | 55 kDa protein                                                                   | K.APAAHPEGQLK.F                      | 2 | 3.30 | 0.43 | -2.76 |
| IPI00790899 | 55 kDa protein                                                                   | K.EVWEELDGLDPNRFNPK.T                | 3 | 2.22 | 0.14 | -2.77 |
| IPI00790899 | 55 kDa protein                                                                   | K.FHPDTPDDVPVPAPAGDQK.E              | 2 | 5.11 | 0.58 | -2.80 |
| IPI00790899 | 55 kDa protein                                                                   | K.FHPDTPDDVPVPAPAGDQK.E              | 3 | 3.43 | 0.24 | -1.70 |
| IPI00790899 | 55 kDa protein                                                                   | K.FHPDTPDDVPVPAPAGDQK.E.V            | 2 | 4.94 | 0.56 | -2.98 |
| IPI00790899 | 55 kDa protein                                                                   | K.FHPDTPDDVPVPAPAGDQKEVDTSEK.K       | 3 | 4.92 | 0.56 | -1.56 |
| IPI00790899 | 55 kDa protein                                                                   | K.FHPDTPDDVPVPAPAGDQKEVDTSEK.L       | 3 | 4.40 | 0.42 | -4.68 |
| IPI00790899 | 55 kDa protein                                                                   | K.FHPDTPDDVPVPAPAGDQKEVDTSEK.L       | 4 | 2.39 | 0.13 | -3.51 |
| IPI00790899 | 55 kDa protein                                                                   | K.LLERLPEVEVPQHL.-                   | 2 | 3.00 | 0.34 | -2.06 |
| IPI00790899 | 55 kDa protein                                                                   | K.LLERLPEVEVPQHL.-                   | 3 | 3.41 | 0.19 | -2.12 |
| IPI00790899 | 55 kDa protein                                                                   | K.LQAANAEDIKSGK.L                    | 2 | 4.23 | 0.39 | -2.50 |
| IPI00790899 | 55 kDa protein                                                                   | K.LQAANAEDIKSGK.L                    | 3 | 2.16 | 0.25 | -2.69 |
| IPI00790899 | 55 kDa protein                                                                   | K.M*DAEQDPNVQVDHLNLLK.Q              | 3 | 4.04 | 0.32 | -1.32 |
| IPI00790899 | 55 kDa protein                                                                   | K.QFEHLDPNQHTFEAR.D                  | 3 | 2.20 | 0.20 | -3.19 |
| IPI00790899 | 55 kDa protein                                                                   | K.TFFILHDINSDGVLDEQEALFTK.E          | 3 | 5.85 | 0.50 | -4.25 |

|             |                                                            |                                   |   |      |      |       |
|-------------|------------------------------------------------------------|-----------------------------------|---|------|------|-------|
| IPI00790899 | 55 kDa protein                                             | K.TFFILHDINSDGVLDEQELEALFTKELEK.V | 3 | 4.07 | 0.38 | -3.54 |
| IPI00790899 | 55 kDa protein                                             | K.TFFILHDINSDGVLDEQELEALFTKELEK.V | 4 | 3.45 | 0.09 | -1.45 |
| IPI00790899 | 55 kDa protein                                             | K.VNVPGSQAQLK.E                   | 2 | 2.73 | 0.33 | -1.84 |
| IPI00790899 | 55 kDa protein                                             | K.VYDPKNEEDDM*REM*EEERLR.M        | 4 | 2.38 | 0.21 | -2.66 |
| IPI00790899 | 55 kDa protein                                             | R.DLAQYDAAHHEEFKR.Y               | 3 | 2.64 | 0.40 | -2.81 |
| IPI00790899 | 55 kDa protein                                             | R.DLELLIQTATR.D                   | 2 | 3.86 | 0.36 | -3.85 |
| IPI00790899 | 55 kDa protein                                             | R.EKLQAANAEDIKSGK.L               | 2 | 4.16 | 0.43 | -1.97 |
| IPI00790899 | 55 kDa protein                                             | R.EKLQAANAEDIKSGK.L               | 3 | 2.26 | 0.20 |       |
| IPI00790899 | 55 kDa protein                                             | R.ELDFVSHHVR.T                    | 2 | 2.96 | 0.33 | -3.39 |
| IPI00790899 | 55 kDa protein                                             | R.ELQQAVLHM*EQR.K                 | 2 | 2.99 | 0.21 |       |
| IPI00790899 | 55 kDa protein                                             | R.ELQQAVLHM*EQR.K                 | 3 | 1.89 | 0.13 | -1.72 |
| IPI00790899 | 55 kDa protein                                             | R.LPEVEVPQHL.-                    | 2 | 2.94 | 0.26 | -2.44 |
| IPI00790899 | 55 kDa protein                                             | R.LSQETEALGR.S                    | 1 | 1.89 | 0.29 | -3.13 |
| IPI00790899 | 55 kDa protein                                             | R.LSQETEALGR.S                    | 2 | 4.09 | 0.32 | -2.49 |
| IPI00790899 | 55 kDa protein                                             | R.LVTLEEFLLASTQR.K                | 2 | 3.71 | 0.32 | -4.76 |
| IPI00790899 | 55 kDa protein                                             | R.LVTLEEFLLASTQR.K                | 3 | 3.61 | 0.34 | -2.86 |
| IPI00790899 | 55 kDa protein                                             | R.RYLESGLGEEQRK.E                 | 3 | 4.16 | 0.16 |       |
| IPI00790899 | 55 kDa protein                                             | R.TKLDLKR.Q                       | 2 | 1.96 | 0.06 | -3.04 |
| IPI00790899 | 55 kDa protein                                             | R.RYLESGLGEEQRK.E                 | 2 | 2.88 | 0.18 | -3.36 |
| IPI00790899 | 55 kDa protein                                             | R.RYLESGLGEEQRK.E                 | 2 | 2.72 | 0.21 | -4.53 |
| IPI00790899 | 55 kDa protein                                             | R.YLQEVLDVLETGDGHR.E              | 2 | 4.78 | 0.38 | -3.56 |
| IPI00790899 | 55 kDa protein                                             | R.YLQEVLDVLETGDGHR.E              | 3 | 3.70 | 0.35 | -4.50 |
| IPI00791134 | Calsyntenin 2                                              | H.LIVQPPFLQSVHHPESR.S             | 2 | 4.10 | 0.49 | -3.84 |
| IPI00791134 | Calsyntenin 2                                              | K.CSELNGR.Y                       | 1 | 1.91 | 0.16 | -1.88 |
| IPI00791134 | Calsyntenin 2                                              | K.DVNEFAPTFKEPAYK.A               | 2 | 3.67 | 0.35 | -2.32 |
| IPI00791134 | Calsyntenin 2                                              | K.VPDGIVPK.N                      | 2 | 2.16 | 0.14 | -3.78 |
| IPI00791134 | Calsyntenin 2                                              | K.YHFNPSQSILVM*EGDDIGNINR.A       | 3 | 4.09 | 0.43 | -2.73 |
| IPI00791134 | Calsyntenin 2                                              | L.IVQPPFLQSVHHPESR.S              | 2 | 3.91 | 0.41 | -2.67 |
| IPI00791134 | Calsyntenin 2                                              | R.YEQVLHHR.Y                      | 2 | 3.06 | 0.30 | -3.83 |
| IPI00791228 | glutamate receptor, ionotropic, AMPA 4 isoform 3 precursor | G.AFPSSVQIGGLFIR.N                | 2 | 4.61 | 0.40 | -5.45 |
| IPI00791228 | glutamate receptor, ionotropic, AMPA 4 isoform 3 precursor | K.GYHYIIANLGFK.D                  | 2 | 2.93 | 0.28 | -0.42 |
| IPI00791228 | glutamate receptor, ionotropic, AMPA 4 isoform 3 precursor | K.GYHYIIANLGFK.D                  | 3 | 3.51 | 0.22 | -0.70 |
| IPI00791228 | glutamate receptor, ionotropic, AMPA 4 isoform 3 precursor | K.NPILRN.-                        | 1 | 1.84 | 0.07 | -2.19 |
| IPI00791228 | glutamate receptor, ionotropic, AMPA 4 isoform 3 precursor | K.YTSALTYDGVLM*AETFR.S            | 2 | 5.21 | 0.56 | -2.12 |
| IPI00791228 | glutamate receptor, ionotropic, AMPA 4 isoform 3 precursor | R.EYPGSETPPK.Y                    | 1 | 1.61 | 0.13 | -1.63 |



|             |                                                            |                              |   |      |      |       |
|-------------|------------------------------------------------------------|------------------------------|---|------|------|-------|
| IPI00791228 | glutamate receptor, ionotropic, AMPA 4 isoform 3 precursor | R.EYPGSETPPK.Y               | 2 | 1.91 | 0.13 | -0.09 |
| IPI00791228 | glutamate receptor, ionotropic, AMPA 4 isoform 3 precursor | R.GVFAIFGLYDK.R              | 2 | 4.05 | 0.40 | -3.25 |
| IPI00791228 | glutamate receptor, ionotropic, AMPA 4 isoform 3 precursor | R.GVFAIFGLYDKR.S             | 2 | 3.60 | 0.37 | -3.51 |
| IPI00791228 | glutamate receptor, ionotropic, AMPA 4 isoform 3 precursor | R.GVFAIFGLYDKR.S             | 3 | 2.72 | 0.31 | -3.38 |
| IPI00791228 | glutamate receptor, ionotropic, AMPA 4 isoform 3 precursor | R.IQGLTGNVQFDHYGR.R          | 2 | 4.56 | 0.58 | -2.92 |
| IPI00791228 | glutamate receptor, ionotropic, AMPA 4 isoform 3 precursor | R.IQGLTGNVQFDHYGR.R          | 3 | 2.02 | 0.14 | -2.18 |
| IPI00791228 | glutamate receptor, ionotropic, AMPA 4 isoform 3 precursor | R.IQGLTGNVQFDHYGR.R.V        | 2 | 2.93 | 0.31 | -4.51 |
| IPI00791228 | glutamate receptor, ionotropic, AMPA 4 isoform 3 precursor | R.IQGLTGNVQFDHYGR.R.V        | 3 | 1.98 | 0.13 | -2.53 |
| IPI00791228 | glutamate receptor, ionotropic, AMPA 4 isoform 3 precursor | R.IQGLTGNVQFDHYGR.R.V        | 4 | 3.45 | 0.26 | -2.65 |
| IPI00791228 | glutamate receptor, ionotropic, AMPA 4 isoform 3 precursor | R.LQNILEQIVSVGK.H            | 1 | 2.06 | 0.19 | -3.60 |
| IPI00791228 | glutamate receptor, ionotropic, AMPA 4 isoform 3 precursor | R.LQNILEQIVSVGK.H            | 2 | 4.99 | 0.43 | -3.36 |
| IPI00791228 | glutamate receptor, ionotropic, AMPA 4 isoform 3 precursor | R.LQNILEQIVSVGK.H            | 3 | 4.15 | 0.29 | -2.78 |
| IPI00791228 | glutamate receptor, ionotropic, AMPA 4 isoform 3 precursor | R.NTDQEYTAFR.L               | 1 | 1.75 | 0.06 | -3.37 |
| IPI00791228 | glutamate receptor, ionotropic, AMPA 4 isoform 3 precursor | R.NTDQEYTAFR.L               | 2 | 3.57 | 0.15 | -2.57 |
| IPI00791228 | glutamate receptor, ionotropic, AMPA 4 isoform 3 precursor | R.RGNAGDCLANPAAPWGQGIDM*ER.T | 3 | 2.90 | 0.11 |       |
| IPI00791343 | 261 kDa protein                                            | K.APQTVELPAVAGHTLTAR.R       | 2 | 4.79 | 0.51 | -3.63 |
| IPI00791343 | 261 kDa protein                                            | K.APQTVELPAVAGHTLTAR.R       | 3 | 4.05 | 0.45 | -2.13 |
| IPI00791343 | 261 kDa protein                                            | K.CESCLQGYFLLDGK.C           | 2 | 5.16 | 0.59 | -3.31 |
| IPI00791343 | 261 kDa protein                                            | K.LDGGQLVWETLM*DSR.L         | 2 | 4.35 | 0.43 | -4.24 |
| IPI00791343 | 261 kDa protein                                            | K.LDGGQLVWETLM*DSR.L         | 3 | 3.83 | 0.36 | -3.13 |
| IPI00791343 | 261 kDa protein                                            | K.WCTNCPEGACIGR.N            | 2 | 4.19 | 0.41 | -4.04 |
| IPI00791343 | 261 kDa protein                                            | R.ALLVHGGHRPSTAR.F           | 2 | 2.49 | 0.27 | -4.47 |
| IPI00791343 | 261 kDa protein                                            | R.CEPGFLGR.A                 | 2 | 1.86 | 0.06 | -1.76 |
| IPI00791343 | 261 kDa protein                                            | R.CM*EGGLSGPR.D              | 2 | 2.84 | 0.32 | -1.37 |
| IPI00791343 | 261 kDa protein                                            | R.FLDTGVVQSDR.S              | 2 | 4.23 | 0.29 | -3.20 |
| IPI00791343 | 261 kDa protein                                            | R.GAM*YLLGGLTAGGVTR.D        | 2 | 5.09 | 0.45 | -3.54 |
| IPI00791343 | 261 kDa protein                                            | R.GAM*YLLGGLTAGGVTR.D        | 3 | 4.67 | 0.30 | -2.11 |

|             |                                                                                                 |                                       |   |      |      |       |
|-------------|-------------------------------------------------------------------------------------------------|---------------------------------------|---|------|------|-------|
| IPI00791343 | 261 kDa protein                                                                                 | R.GDLM*AYK.V                          | 1 | 1.62 | 0.07 | -2.56 |
| IPI00791343 | 261 kDa protein                                                                                 | R.GDLM*AYK.V                          | 2 | 2.49 | 0.20 | -3.42 |
| IPI00791343 | 261 kDa protein                                                                                 | R.GPESCSLGCAQATQCALCLR.R              | 2 | 5.74 | 0.64 | -3.59 |
| IPI00791343 | 261 kDa protein                                                                                 | R.GPESCSLGCAQATQCALCLR.R              | 3 | 5.56 | 0.44 | -3.06 |
| IPI00791343 | 261 kDa protein                                                                                 | R.GPLLASLSGSTRPPPIEASSGK.M            | 2 | 5.79 | 0.61 | -3.95 |
| IPI00791343 | 261 kDa protein                                                                                 | R.GPLLASLSGSTRPPPIEASSGK.M            | 3 | 4.40 | 0.52 | -2.99 |
| IPI00791343 | 261 kDa protein                                                                                 | R.LFHASALLGDTM*VVLGGR.S               | 3 | 3.90 | 0.39 | -2.59 |
| IPI00791343 | 261 kDa protein                                                                                 | R.LGCGGSPCSPM*PR.S                    | 2 | 3.05 | 0.36 | -2.65 |
| IPI00791343 | 261 kDa protein                                                                                 | R.LGHTM*VDGPDATLWM*FGGLGLPQGLLGNLYR.Y | 3 | 4.95 | 0.32 | -2.31 |
| IPI00791343 | 261 kDa protein                                                                                 | R.LLALTLPPDPCR.L                      | 2 | 3.46 | 0.41 | -4.32 |
| IPI00791343 | 261 kDa protein                                                                                 | R.LLGDCQAQLAFSSPTAPPR.G               | 3 | 3.36 | 0.25 | -0.53 |
| IPI00791343 | 261 kDa protein                                                                                 | R.LLRGPESCSLGCAQATQCALCLR.R           | 3 | 5.42 | 0.39 | -1.68 |
| IPI00791343 | 261 kDa protein                                                                                 | R.LSADTASR.F                          | 2 | 2.52 | 0.20 | -3.22 |
| IPI00791343 | 261 kDa protein                                                                                 | R.LYISGGFGGVALGR.L                    | 2 | 4.43 | 0.50 | -3.67 |
| IPI00791343 | 261 kDa protein                                                                                 | R.QEKAPQTVELPAVAGHTLTAR.R             | 2 | 4.24 | 0.37 | -3.87 |
| IPI00791343 | 261 kDa protein                                                                                 | R.QEKAPQTVELPAVAGHTLTAR.R             | 3 | 3.88 | 0.38 | -2.97 |
| IPI00791343 | 261 kDa protein                                                                                 | R.RVGGLLPPGGGAAR.A                    | 2 | 4.59 | 0.41 | -3.31 |
| IPI00791343 | 261 kDa protein                                                                                 | R.SASVGPPM*EESVAHAVAAVGSR.L           | 2 | 5.06 | 0.56 | -2.37 |
| IPI00791343 | 261 kDa protein                                                                                 | R.SASVGPPM*EESVAHAVAAVGSR.L           | 3 | 3.17 | 0.49 | -3.84 |
| IPI00791343 | 261 kDa protein                                                                                 | R.SFHAAAYVPAGR.G                      | 1 | 3.37 | 0.33 | -3.97 |
| IPI00791343 | 261 kDa protein                                                                                 | R.SFHAAAYVPAGR.G                      | 2 | 3.70 | 0.47 | -3.81 |
| IPI00791343 | 261 kDa protein                                                                                 | R.SLIAAFCGQR.R                        | 1 | 1.30 | 0.09 | -2.30 |
| IPI00791343 | 261 kDa protein                                                                                 | R.SLIAAFCGQR.R                        | 2 | 3.69 | 0.39 | -1.86 |
| IPI00791343 | 261 kDa protein                                                                                 | R.TLQPGDGEASTPR.C                     | 1 | 1.97 | 0.27 | -1.84 |
| IPI00791343 | 261 kDa protein                                                                                 | R.TLQPGDGEASTPR.C                     | 2 | 3.56 | 0.42 | -3.28 |
| IPI00791343 | 261 kDa protein                                                                                 | R.TLQPGDGEASTPR.C                     | 3 | 2.65 | 0.12 | -2.26 |
| IPI00791343 | 261 kDa protein                                                                                 | R.TPHDLFSSGLFR.F                      | 1 | 1.97 | 0.30 | -2.27 |
| IPI00791343 | 261 kDa protein                                                                                 | R.TPHDLFSSGLFR.F                      | 2 | 2.57 | 0.45 | -4.38 |
| IPI00791343 | 261 kDa protein                                                                                 | R.TPHDLFSSGLFR.F                      | 3 | 3.32 | 0.23 | -2.27 |
| IPI00791343 | 261 kDa protein                                                                                 | R.TWSSLAPSQGAK.R                      | 1 | 2.36 | 0.29 | -1.83 |
| IPI00791343 | 261 kDa protein                                                                                 | R.TWSSLAPSQGAK.R                      | 2 | 2.99 | 0.21 | -2.12 |
| IPI00791343 | 261 kDa protein                                                                                 | R.VGGLLPPGGGAAR.A                     | 2 | 2.61 | 0.16 | -2.40 |
| IPI00791343 | 261 kDa protein                                                                                 | R.WTQM*LAGAEDGGPGSPR.S                | 2 | 4.66 | 0.51 | -6.90 |
| IPI00791343 | 261 kDa protein                                                                                 | W.TQM*LAGAEDGGPGSPR.S                 | 2 | 4.54 | 0.50 | -3.94 |
| IPI00791343 | 261 kDa protein                                                                                 | W.VGEGLGLPVALPAR.W                    | 2 | 3.04 | 0.24 | -1.28 |
| IPI00791479 | CDNA FLJ90299 fis, clone NT2RP2000514, highly similar to Homo sapiens roundabout 2 (robo2) mRNA | K.EGSQNLLFPNQPQPPNSR.C                | 2 | 3.40 | 0.32 | -3.59 |
| IPI00791479 | CDNA FLJ90299 fis, clone NT2RP2000514, highly similar to Homo sapiens roundabout 2 (robo2) mRNA | K.GNPQPAVFWQK.E                       | 2 | 2.89 | 0.31 | -3.28 |

|             |                                                                                                 |                                 |   |      |      |       |
|-------------|-------------------------------------------------------------------------------------------------|---------------------------------|---|------|------|-------|
| IPI00791479 | CDNA FLJ90299 fis, clone NT2RP2000514, highly similar to Homo sapiens roundabout 2 (robo2) mRNA | R.ARPVAPPQFVVRPR.D              | 3 | 3.01 | 0.25 | -3.29 |
| IPI00791479 | CDNA FLJ90299 fis, clone NT2RP2000514, highly similar to Homo sapiens roundabout 2 (robo2) mRNA | R.CSVSPTGDLTITNIQR.S            | 2 | 4.13 | 0.35 | -3.27 |
| IPI00791479 | CDNA FLJ90299 fis, clone NT2RP2000514, highly similar to Homo sapiens roundabout 2 (robo2) mRNA | R.SDAGYYICQALTVAGSILAK.A        | 2 | 5.02 | 0.50 | -2.13 |
| IPI00791479 | CDNA FLJ90299 fis, clone NT2RP2000514, highly similar to Homo sapiens roundabout 2 (robo2) mRNA | R.SDAGYYICQALTVAGSILAK.A        | 3 | 3.83 | 0.36 | -1.85 |
| IPI00791479 | CDNA FLJ90299 fis, clone NT2RP2000514, highly similar to Homo sapiens roundabout 2 (robo2) mRNA | R.SVIIGGLFPGIQYR.V              | 2 | 4.12 | 0.46 | -3.67 |
| IPI00791513 | CDNA FLJ16614 fis, clone TESTI4013365                                                           | K.KDQQIGGENGAEIQGK.R            | 2 | 2.49 | 0.13 |       |
| IPI00791593 | 8 kDa protein                                                                                   | R.YSSATASEGK.L                  | 2 | 1.84 | 0.22 |       |
| IPI00792115 | Putative uncharacterized protein DKFZp686H17246                                                 | K.CFLAFTQTK.T                   | 1 | 2.54 | 0.20 | -2.76 |
| IPI00792115 | Putative uncharacterized protein DKFZp686H17246                                                 | K.CFLAFTQTK.T                   | 2 | 3.20 | 0.37 | -2.45 |
| IPI00792115 | Putative uncharacterized protein DKFZp686H17246                                                 | K.EQQALQTVCLK.G                 | 1 | 3.01 | 0.18 | -3.74 |
| IPI00792115 | Putative uncharacterized protein DKFZp686H17246                                                 | K.EQQALQTVCLK.G                 | 2 | 3.32 | 0.37 | -3.62 |
| IPI00792115 | Putative uncharacterized protein DKFZp686H17246                                                 | K.EQQALQTVCLKGTK.V              | 2 | 2.68 | 0.25 | -2.63 |
| IPI00792115 | Putative uncharacterized protein DKFZp686H17246                                                 | K.NWETEITAQPDGGK.T              | 2 | 4.46 | 0.38 | -4.28 |
| IPI00792115 | Putative uncharacterized protein DKFZp686H17246                                                 | K.NWETEITAQPDGGKTENCAVLGAANGK.W | 2 | 4.07 | 0.51 | -1.51 |
| IPI00792115 | Putative uncharacterized protein DKFZp686H17246                                                 | K.NWETEITAQPDGGKTENCAVLGAANGK.W | 3 | 6.12 | 0.48 | -2.48 |
| IPI00792115 | Putative uncharacterized protein DKFZp686H17246                                                 | K.SRLDTLAQEVALLK.E              | 2 | 4.32 | 0.30 | -4.26 |
| IPI00792115 | Putative uncharacterized protein DKFZp686H17246                                                 | K.SRLDTLAQEVALLK.E              | 3 | 5.44 | 0.28 | -1.98 |
| IPI00792115 | Putative uncharacterized protein DKFZp686H17246                                                 | K.SRLDTLAQEVALLKEQQALQTVCLK.G   | 3 | 7.37 | 0.58 | -5.46 |
| IPI00792115 | Putative uncharacterized protein DKFZp686H17246                                                 | K.SRLDTLAQEVALLKEQQALQTVCLK.G   | 4 | 3.04 | 0.12 | -4.68 |

|             |                                                 |                                      |   |      |      |       |
|-------------|-------------------------------------------------|--------------------------------------|---|------|------|-------|
| IPI00792115 | Putative uncharacterized protein DKFZp686H17246 | K.TENCAVLSGAANGK.W                   | 2 | 2.93 | 0.20 |       |
| IPI00792115 | Putative uncharacterized protein DKFZp686H17246 | K.TFHEASEDCISR.G                     | 2 | 4.05 | 0.45 | -4.16 |
| IPI00792115 | Putative uncharacterized protein DKFZp686H17246 | K.TFHEASEDCISR.G                     | 3 | 3.34 | 0.23 | -1.76 |
| IPI00792115 | Putative uncharacterized protein DKFZp686H17246 | R.CRDQLPYICQFGIV.-                   | 2 | 4.68 | 0.51 | -3.54 |
| IPI00792115 | Putative uncharacterized protein DKFZp686H17246 | R.DQLPYICQFGIV.-                     | 2 | 2.16 | 0.09 | -2.08 |
| IPI00792115 | Putative uncharacterized protein DKFZp686H17246 | R.GGTLGTPQTGSENDALYEYLR.Q            | 2 | 5.92 | 0.61 | -3.99 |
| IPI00792115 | Putative uncharacterized protein DKFZp686H17246 | R.GGTLGTPQTGSENDALYEYLR.Q            | 3 | 5.28 | 0.44 | -2.77 |
| IPI00792115 | Putative uncharacterized protein DKFZp686H17246 | R.IAYKNWETEITAQPDGGKTENCAVLSGAANGK.W | 3 | 6.48 | 0.53 | -3.81 |
| IPI00792115 | Putative uncharacterized protein DKFZp686H17246 | R.IAYKNWETEITAQPDGGKTENCAVLSGAANGK.W | 4 | 5.14 | 0.41 | -3.92 |
| IPI00792115 | Putative uncharacterized protein DKFZp686H17246 | R.LDTLAQEVALLK.E                     | 1 | 2.66 | 0.28 | -3.34 |
| IPI00792115 | Putative uncharacterized protein DKFZp686H17246 | R.LDTLAQEVALLK.E                     | 2 | 4.53 | 0.38 | -3.92 |
| IPI00792115 | Putative uncharacterized protein DKFZp686H17246 | R.LDTLAQEVALLK.E                     | 3 | 4.91 | 0.22 | -3.16 |
| IPI00792115 | Putative uncharacterized protein DKFZp686H17246 | R.LDTLAQEVALLKEQQALQTVCLK.G          | 2 | 5.17 | 0.55 | -3.09 |
| IPI00792115 | Putative uncharacterized protein DKFZp686H17246 | R.LDTLAQEVALLKEQQALQTVCLK.G          | 3 | 7.33 | 0.61 | -4.02 |
| IPI00792115 | Putative uncharacterized protein DKFZp686H17246 | R.LDTLAQEVALLKEQQALQTVCLK.G          | 4 | 4.46 | 0.40 | -3.04 |
| IPI00792115 | Putative uncharacterized protein DKFZp686H17246 | R.QSVGNEAEIWLGLNDM*AAEGTWVDM*TGAR.I  | 3 | 6.01 | 0.55 | -5.00 |
| IPI00792115 | Putative uncharacterized protein DKFZp686H17246 | W.ETEITAQPDGGK.T                     | 2 | 3.01 | 0.21 | -3.99 |
| IPI00792229 | 20 kDa protein                                  | K.QMVSSYFFYQKK.N                     | 1 | 2.35 | 0.07 |       |
| IPI00792626 | 14 kDa protein                                  | K.DKSKEFQLFSSPHGK.D                  | 2 | 2.51 | 0.28 |       |
| IPI00792626 | 14 kDa protein                                  | K.DKSKEFQLFSSPHGKDLLFK.D             | 2 | 6.23 | 0.42 |       |
| IPI00792626 | 14 kDa protein                                  | K.DKSKEFQLFSSPHGKDLLFK.D             | 3 | 5.24 | 0.40 |       |
| IPI00792626 | 14 kDa protein                                  | K.DLLFKDSAHGFLK.V                    | 1 | 3.62 | 0.41 |       |
| IPI00792626 | 14 kDa protein                                  | K.DLLFKDSAHGFLK.V                    | 2 | 4.38 | 0.40 |       |
| IPI00792626 | 14 kDa protein                                  | K.DLLFKDSAHGFLK.V                    | 3 | 3.49 | 0.26 |       |
| IPI00792626 | 14 kDa protein                                  | K.DLLFKDSAHGFLKPPR.M                 | 2 | 5.13 | 0.48 |       |

|             |                |                                |   |      |      |       |
|-------------|----------------|--------------------------------|---|------|------|-------|
| IPI00792626 | 14 kDa protein | K.DLLFKDSAHGFLKVPPR.M          | 3 | 5.34 | 0.41 |       |
| IPI00792626 | 14 kDa protein | K.DLLFKDSAHGFLKVPPRM*DAK.M     | 3 | 4.19 | 0.13 |       |
| IPI00792626 | 14 kDa protein | K.DSAHGFLK.V                   | 1 | 2.44 | 0.24 |       |
| IPI00792626 | 14 kDa protein | K.DSAHGFLK.V                   | 2 | 2.40 | 0.15 |       |
| IPI00792626 | 14 kDa protein | K.DSAHGFLKVPPR.M               | 1 | 3.52 | 0.21 |       |
| IPI00792626 | 14 kDa protein | K.DSAHGFLKVPPR.M               | 2 | 3.23 | 0.23 |       |
| IPI00792626 | 14 kDa protein | K.DSAHGFLKVPPR.M               | 3 | 4.65 | 0.18 |       |
| IPI00792626 | 14 kDa protein | K.DSAHGFLKVPPRM*DAK.M          | 2 | 3.69 | 0.34 |       |
| IPI00792626 | 14 kDa protein | K.DSAHGFLKVPPRM*DAK.M          | 3 | 2.58 | 0.18 |       |
| IPI00792626 | 14 kDa protein | K.EDLIWELLNQAQEHFGK.D          | 2 | 4.72 | 0.33 |       |
| IPI00792626 | 14 kDa protein | K.EDLIWELLNQAQEHFGK.D          | 3 | 2.14 | 0.21 |       |
| IPI00792626 | 14 kDa protein | K.EDLIWELLNQAQEHFGKDK.S        | 2 | 4.78 | 0.43 |       |
| IPI00792626 | 14 kDa protein | K.EDLIWELLNQAQEHFGKDK.S        | 3 | 2.30 | 0.17 |       |
| IPI00792626 | 14 kDa protein | K.EFQLFSSPHGK.D                | 1 | 3.05 | 0.29 |       |
| IPI00792626 | 14 kDa protein | K.EFQLFSSPHGK.D                | 2 | 3.63 | 0.30 |       |
| IPI00792626 | 14 kDa protein | K.EFQLFSSPHGKDLLFK.D           | 2 | 5.05 | 0.33 |       |
| IPI00792626 | 14 kDa protein | K.EFQLFSSPHGKDLLFKDSAHGFLK.V   | 2 | 5.13 | 0.28 |       |
| IPI00792626 | 14 kDa protein | K.EFQLFSSPHGKDLLFKDSAHGFLK.V   | 3 | 6.53 | 0.38 |       |
| IPI00792626 | 14 kDa protein | K.M*YLGYEYVTAIR.N              | 2 | 3.62 | 0.43 | -3.23 |
| IPI00792626 | 14 kDa protein | K.M*YLGYEYVTAIR.N              | 3 | 4.11 | 0.27 |       |
| IPI00792626 | 14 kDa protein | K.MYLGYEYVTAIR.N               | 1 | 2.50 | 0.33 |       |
| IPI00792626 | 14 kDa protein | K.MYLGYEYVTAIR.N               | 2 | 4.77 | 0.51 |       |
| IPI00792626 | 14 kDa protein | K.MYLGYEYVTAIR.N               | 3 | 4.25 | 0.21 |       |
| IPI00792626 | 14 kDa protein | K.SKEFQLFSSPHGK.D              | 1 | 2.23 | 0.41 |       |
| IPI00792626 | 14 kDa protein | K.SKEFQLFSSPHGK.D              | 2 | 4.94 | 0.42 |       |
| IPI00792626 | 14 kDa protein | K.SKEFQLFSSPHGK.D              | 3 | 4.19 | 0.35 |       |
| IPI00792626 | 14 kDa protein | K.SKEFQLFSSPHGKDLLFK.D         | 2 | 4.96 | 0.36 |       |
| IPI00792626 | 14 kDa protein | K.SKEFQLFSSPHGKDLLFK.D         | 3 | 4.78 | 0.22 |       |
| IPI00792626 | 14 kDa protein | K.SKEFQLFSSPHGKDLLFKDSAHGFLK.V | 3 | 7.69 | 0.50 |       |
| IPI00792626 | 14 kDa protein | R.EGTCPEAPTDECKPVK.W           | 1 | 2.79 | 0.34 |       |
| IPI00792626 | 14 kDa protein | R.EGTCPEAPTDECKPVK.W           | 2 | 3.97 | 0.30 |       |
| IPI00792626 | 14 kDa protein | R.NLREGTCPEAPTDECKPVK.W        | 2 | 5.48 | 0.41 |       |
| IPI00792626 | 14 kDa protein | R.NLREGTCPEAPTDECKPVK.W        | 3 | 5.92 | 0.32 |       |
| IPI00792759 | 73 kDa protein | K.SNNYLALR.S                   | 2 | 2.27 | 0.12 | -1.45 |
| IPI00792945 | 38 kDa protein | -.M*TQESFGSGGGGSPK.G           | 2 | 2.37 | 0.12 |       |
| IPI00793166 | 15 kDa protein | K.DQEDSDGHLNVN.L               | 2 | 3.25 | 0.36 | -2.07 |
| IPI00793166 | 15 kDa protein | K.ETAVSTEDDSSHK.A              | 2 | 2.22 | 0.26 | -2.85 |
| IPI00793166 | 15 kDa protein | K.ETAVSTEDDSSHKAEK.S           | 2 | 4.09 | 0.46 | -1.33 |
| IPI00793166 | 15 kDa protein | K.ETAVSTEDDSSHKAEK.S           | 3 | 1.74 | 0.15 | -0.16 |
| IPI00793166 | 15 kDa protein | K.SKEESHEQSAEQGK.S             | 2 | 2.96 | 0.39 | -1.61 |
| IPI00793166 | 15 kDa protein | K.SKEESHEQSAEQGKSSSQELGLK.D    | 3 | 6.12 | 0.46 | -4.54 |
| IPI00793166 | 15 kDa protein | K.SKEESHEQSAEQGKSSSQELGLK.D    | 4 | 4.36 | 0.50 | -2.87 |

|             |                |                                       |   |      |      |       |
|-------------|----------------|---------------------------------------|---|------|------|-------|
| IPI00793166 | 15 kDa protein | K.SSSQELGLK.D                         | 1 | 1.78 | 0.09 | -1.65 |
| IPI00793166 | 15 kDa protein | K.SSSQELGLK.D                         | 2 | 2.60 | 0.23 | -1.02 |
| IPI00793166 | 15 kDa protein | K.SSSQELGLKQEDS.D                     | 2 | 3.29 | 0.23 | -3.34 |
| IPI00793166 | 15 kDa protein | K.SSSQELGLKQEDSDGH.L                  | 2 | 4.67 | 0.52 | -1.63 |
| IPI00793166 | 15 kDa protein | K.SSSQELGLKQEDSDGH.L                  | 3 | 3.68 | 0.38 | -1.37 |
| IPI00793166 | 15 kDa protein | K.SSSQELGLKQEDSDGHL.S                 | 2 | 4.02 | 0.47 | -7.54 |
| IPI00793166 | 15 kDa protein | K.SSSQELGLKQEDSDGHLS.V                | 2 | 4.09 | 0.47 | -1.43 |
| IPI00793166 | 15 kDa protein | R.AEAEENEKETAVSTEDDSSHK.A             | 3 | 4.57 | 0.55 | -1.84 |
| IPI00793166 | 15 kDa protein | R.AEAEENEKETAVSTEDDSSHKAEK.S          | 3 | 6.03 | 0.50 | -5.83 |
| IPI00793166 | 15 kDa protein | R.AEAEENEKETAVSTEDDSSHKAEK.S          | 4 | 3.15 | 0.36 | -3.51 |
| IPI00793166 | 15 kDa protein | R.AEAEENEKETAVSTEDDSSHKAEK.S          | 5 | 2.28 | 0.27 | -2.85 |
| IPI00793576 | 7 kDa protein  | R.EVHAQLPGQLEEGEQGAGEPLAEDAVR.V       | 3 | 6.74 | 0.54 | -2.90 |
| IPI00794070 | CFI protein    | C.KVITYTSQEDLVEK.K                    | 2 | 4.88 | 0.46 | -3.48 |
| IPI00794070 | CFI protein    | C.KVITYTSQEDLVEKK.C                   | 2 | 4.84 | 0.45 | -4.68 |
| IPI00794070 | CFI protein    | C.KVITYTSQEDLVEKK.C                   | 3 | 5.51 | 0.48 | -2.62 |
| IPI00794070 | CFI protein    | K.ACDGINDCGDQSDLCCK.A                 | 2 | 6.05 | 0.69 | -4.73 |
| IPI00794070 | CFI protein    | K.ACDGINDCGDQSDLCCK.A                 | 3 | 2.05 | 0.15 | -3.00 |
| IPI00794070 | CFI protein    | K.ADSPM*DDFFQCVNGK.Y                  | 2 | 4.57 | 0.37 | -5.39 |
| IPI00794070 | CFI protein    | K.ADSPM*DDFFQCVNGK.Y                  | 3 | 2.60 | 0.18 | -3.40 |
| IPI00794070 | CFI protein    | K.HGNTDSEGIVEVK.L                     | 2 | 4.52 | 0.54 | -3.53 |
| IPI00794070 | CFI protein    | K.HGNTDSEGIVEVK.L                     | 3 | 2.40 | 0.09 | -2.86 |
| IPI00794070 | CFI protein    | K.LVDQDKTM*FICK.S                     | 2 | 3.31 | 0.24 |       |
| IPI00794070 | CFI protein    | K.LVDQDKTM*FICK.S                     | 3 | 1.85 | 0.23 | -0.08 |
| IPI00794070 | CFI protein    | R.CIEGTCVCK.L                         | 2 | 2.35 | 0.31 | -1.42 |
| IPI00794070 | CFI protein    | R.EANVACLDLGFQQGADTQR.R               | 2 | 6.52 | 0.54 | -3.47 |
| IPI00794070 | CFI protein    | R.EANVACLDLGFQQGADTQR.R               | 3 | 5.34 | 0.56 | -3.65 |
| IPI00794070 | CFI protein    | R.GLETSLAECTFTK.R                     | 2 | 4.95 | 0.45 | -1.90 |
| IPI00794070 | CFI protein    | R.RTM*GYQDFADVVCYTQK.A                | 3 | 2.38 | 0.17 | -3.28 |
| IPI00794070 | CFI protein    | R.SFPTYCQQK.S                         | 2 | 1.27 | 0.05 | -2.44 |
| IPI00794070 | CFI protein    | R.TM*GYQDFADVVCYTQK.A                 | 2 | 6.07 | 0.65 | -3.11 |
| IPI00794070 | CFI protein    | R.TM*GYQDFADVVCYTQK.A                 | 3 | 5.00 | 0.37 | -3.35 |
| IPI00794070 | CFI protein    | R.TM*GYQDFADVVCYTQKADSPM*DDFFQCVNGK.Y | 3 | 3.89 | 0.39 | -2.50 |
| IPI00794070 | CFI protein    | V.TYTSQEDLVEKK.C                      | 2 | 3.32 | 0.36 | -3.06 |
| IPI00794119 | 13 kDa protein | R.TVVTIAPQEGHPQLWPPRVVFPSP.-          | 3 | 2.46 | 0.16 |       |
| IPI00794184 | 97 kDa protein | A.YPLSIEPIGVR.F                       | 2 | 3.60 | 0.37 | -2.72 |
| IPI00794184 | 97 kDa protein | D.PTKDIFTGLIGPM*K.I                   | 3 | 3.62 | 0.36 | -1.23 |
| IPI00794184 | 97 kDa protein | F.PGTYQTLEM*FPR.T                     | 2 | 3.96 | 0.39 | -2.65 |
| IPI00794184 | 97 kDa protein | I.FPGTYQTLEM*FPR.T                    | 2 | 3.55 | 0.37 | -2.25 |
| IPI00794184 | 97 kDa protein | K.AEEEEHLGILGPQLHADVGDK.V             | 2 | 4.61 | 0.48 | -1.81 |
| IPI00794184 | 97 kDa protein | K.AEEEEHLGILGPQLHADVGDKV.K.I          | 2 | 5.48 | 0.48 | -4.54 |
| IPI00794184 | 97 kDa protein | K.AEEEEHLGILGPQLHADVGDKV.K.I          | 3 | 5.94 | 0.52 | -4.23 |
| IPI00794184 | 97 kDa protein | K.AEEEEHLGILGPQLHADVGDKV.K.I          | 4 | 4.17 | 0.28 | -4.31 |

|             |                |                                         |   |      |      |       |
|-------------|----------------|-----------------------------------------|---|------|------|-------|
| IPI00794184 | 97 kDa protein | K.AEEEEHLGILGPQLHADVGDVK.I              | 5 | 3.85 | 0.21 | -3.02 |
| IPI00794184 | 97 kDa protein | K.AGLQAFFQVQECNK.S                      | 2 | 5.46 | 0.49 | -4.75 |
| IPI00794184 | 97 kDa protein | K.AGLQAFFQVQECNK.S                      | 3 | 3.44 | 0.28 | -1.40 |
| IPI00794184 | 97 kDa protein | K.DDEEFIESNK.M                          | 2 | 3.88 | 0.32 | -1.78 |
| IPI00794184 | 97 kDa protein | K.DIFTGLIGPM*K.I                        | 2 | 2.90 | 0.33 | -2.25 |
| IPI00794184 | 97 kDa protein | K.DLYSGLIGPLIVCR.R                      | 1 | 3.90 | 0.49 | -3.87 |
| IPI00794184 | 97 kDa protein | K.DLYSGLIGPLIVCR.R                      | 2 | 4.30 | 0.51 | -4.67 |
| IPI00794184 | 97 kDa protein | K.DLYSGLIGPLIVCR.R                      | 3 | 5.48 | 0.37 | -2.73 |
| IPI00794184 | 97 kDa protein | K.DNEDFQESNR.M                          | 2 | 3.09 | 0.26 | -2.71 |
| IPI00794184 | 97 kDa protein | K.DVDKEFYLFPTVFDENESLLEDNIR.M           | 3 | 6.10 | 0.56 | -6.96 |
| IPI00794184 | 97 kDa protein | K.DVDKEFYLFPTVFDENESLLEDNIR.M           | 4 | 3.24 | 0.18 | -3.45 |
| IPI00794184 | 97 kDa protein | K.EFYLFPTVFDENESLLEDNIR.M               | 2 | 4.53 | 0.47 | -1.74 |
| IPI00794184 | 97 kDa protein | K.EFYLFPTVFDENESLLEDNIR.M               | 3 | 4.99 | 0.40 | -3.88 |
| IPI00794184 | 97 kDa protein | K.ERGPEEEHLGILGPVIWAEVGDITR.V           | 2 | 4.23 | 0.54 | -2.43 |
| IPI00794184 | 97 kDa protein | K.ERGPEEEHLGILGPVIWAEVGDITR.V           | 3 | 7.54 | 0.56 | -7.31 |
| IPI00794184 | 97 kDa protein | K.ERGPEEEHLGILGPVIWAEVGDITR.V           | 4 | 3.79 | 0.33 | -4.10 |
| IPI00794184 | 97 kDa protein | K.EVGPTNADPVCLAK.M                      | 1 | 2.64 | 0.39 | -1.13 |
| IPI00794184 | 97 kDa protein | K.EVGPTNADPVCLAK.M                      | 2 | 3.88 | 0.55 | -3.64 |
| IPI00794184 | 97 kDa protein | K.GAYPLSIEPIGVR.F                       | 1 | 2.54 | 0.33 | -2.91 |
| IPI00794184 | 97 kDa protein | K.GAYPLSIEPIGVR.F                       | 2 | 4.04 | 0.35 | -3.82 |
| IPI00794184 | 97 kDa protein | K.GAYPLSIEPIGVR.F                       | 3 | 3.51 | 0.13 | -3.01 |
| IPI00794184 | 97 kDa protein | K.GEFYIGSK.Y                            | 1 | 2.08 | 0.19 | -1.66 |
| IPI00794184 | 97 kDa protein | K.GEFYIGSK.Y                            | 2 | 2.73 | 0.26 | -2.70 |
| IPI00794184 | 97 kDa protein | K.HRGVYSSDVFDFPGTYQTLEM*FPR.T           | 4 | 3.83 | 0.39 | -1.14 |
| IPI00794184 | 97 kDa protein | K.LVYREYTDASFTNR.K                      | 3 | 3.35 | 0.21 | -2.72 |
| IPI00794184 | 97 kDa protein | K.LVYREYTDASFTNRK.E                     | 2 | 3.01 | 0.30 | -4.94 |
| IPI00794184 | 97 kDa protein | K.LVYREYTDASFTNRK.E                     | 3 | 4.32 | 0.34 | -4.01 |
| IPI00794184 | 97 kDa protein | K.M*YYSAVEPTKDIFTGLIGPM*K.I             | 2 | 4.16 | 0.51 | -3.41 |
| IPI00794184 | 97 kDa protein | K.M*YYSAVEPTKDIFTGLIGPM*K.I             | 3 | 4.85 | 0.46 | -3.93 |
| IPI00794184 | 97 kDa protein | K.NM*ATRPYSIHAGVQTESSTVTPTLPGETLTYVWK.I | 4 | 4.05 | 0.24 | -4.52 |
| IPI00794184 | 97 kDa protein | K.NNEGTYYSNPYNPQSR.S                    | 2 | 5.00 | 0.47 | -3.76 |
| IPI00794184 | 97 kDa protein | K.NNEGTYYSNPYNPQSR.S                    | 3 | 3.27 | 0.17 | -3.26 |
| IPI00794184 | 97 kDa protein | K.TYCSEPEKVDKDNEDFQESNR.M               | 3 | 4.93 | 0.40 |       |
| IPI00794184 | 97 kDa protein | K.TYCSEPEKVDKDNEDFQESNR.M               | 4 | 2.21 | 0.11 | -1.17 |
| IPI00794184 | 97 kDa protein | K.TYSDHPEK.V                            | 2 | 2.65 | 0.32 | -2.09 |
| IPI00794184 | 97 kDa protein | K.TYSDHPEKVNKDDEEFIESNK.M               | 2 | 5.12 | 0.53 | -4.66 |
| IPI00794184 | 97 kDa protein | K.TYSDHPEKVNKDDEEFIESNK.M               | 3 | 6.29 | 0.57 | -3.86 |
| IPI00794184 | 97 kDa protein | K.TYSDHPEKVNKDDEEFIESNK.M               | 4 | 2.98 | 0.36 | -3.08 |
| IPI00794184 | 97 kDa protein | K.TYSDHPEKVNKDDEEFIESNK.M               | 5 | 2.49 | 0.13 | -2.22 |
| IPI00794184 | 97 kDa protein | K.VDKDNEDFQESNR.M                       | 2 | 4.40 | 0.45 | -2.97 |
| IPI00794184 | 97 kDa protein | K.VDKDNEDFQESNR.M                       | 3 | 4.20 | 0.26 | -1.33 |
| IPI00794184 | 97 kDa protein | K.VNKDDEEFIESNK.M                       | 2 | 4.32 | 0.33 | -5.08 |

|             |                |                                             |   |      |      |       |
|-------------|----------------|---------------------------------------------|---|------|------|-------|
| IPI00794184 | 97 kDa protein | K.VNKDDEEFIESNK.M                           | 3 | 4.50 | 0.26 | -1.35 |
| IPI00794184 | 97 kDa protein | K.VNKDDEEFIESNKM*HAINGR.M                   | 3 | 3.00 | 0.27 | -5.32 |
| IPI00794184 | 97 kDa protein | K.VNKDDEEFIESNKM*HAINGR.M                   | 4 | 3.54 | 0.15 | -2.20 |
| IPI00794184 | 97 kDa protein | K.VVYRQYTDSTFRVPVER.K                       | 3 | 3.20 | 0.32 | -1.44 |
| IPI00794184 | 97 kDa protein | K.WYLFGM*GNEVDVHAAFFHGQALTNK.N              | 3 | 3.54 | 0.36 | -4.14 |
| IPI00794184 | 97 kDa protein | K.WYLFGM*GNEVDVHAAFFHGQALTNK.N              | 4 | 4.01 | 0.43 | -4.32 |
| IPI00794184 | 97 kDa protein | K.YTVNQCR.R                                 | 2 | 2.78 | 0.29 | -2.16 |
| IPI00794184 | 97 kDa protein | L.GPQLHADVGDVK.I                            | 2 | 3.28 | 0.40 | -4.07 |
| IPI00794184 | 97 kDa protein | L.YSGLIGPLIVCR.R                            | 2 | 3.20 | 0.28 | -6.01 |
| IPI00794184 | 97 kDa protein | R.DTANLFPQTSLLH.M                           | 2 | 4.04 | 0.44 | -4.36 |
| IPI00794184 | 97 kDa protein | R.DTANLFPQTSLLHM*WPDTEGTFNVECLTDDHYTGGM*K.Q | 3 | 4.40 | 0.53 | -3.98 |
| IPI00794184 | 97 kDa protein | R.EYTDASFTNR.K                              | 1 | 2.35 | 0.45 | -3.89 |
| IPI00794184 | 97 kDa protein | R.EYTDASFTNR.K                              | 2 | 3.40 | 0.49 | -3.83 |
| IPI00794184 | 97 kDa protein | R.EYTDASFTNRK.E                             | 2 | 2.58 | 0.32 | -3.42 |
| IPI00794184 | 97 kDa protein | R.FNKNEGTYSPNYPQSR.S                        | 2 | 5.74 | 0.38 | -4.97 |
| IPI00794184 | 97 kDa protein | R.FNKNEGTYSPNYPQSR.S                        | 3 | 5.62 | 0.40 | -3.77 |
| IPI00794184 | 97 kDa protein | R.GPEEEHLGILGPVIWAEVGDITIR.V                | 2 | 6.42 | 0.60 | -5.04 |
| IPI00794184 | 97 kDa protein | R.GPEEEHLGILGPVIWAEVGDITIR.V                | 3 | 6.06 | 0.57 | -8.59 |
| IPI00794184 | 97 kDa protein | R.GPEEEHLGILGPVIWAEVGDITIR.V                | 4 | 3.41 | 0.16 | -2.39 |
| IPI00794184 | 97 kDa protein | R.GVYSSDVDFIFPGTYQTLEM*FPR.T                | 2 | 5.11 | 0.59 | -5.55 |
| IPI00794184 | 97 kDa protein | R.GVYSSDVDFIFPGTYQTLEM*FPR.T                | 3 | 4.75 | 0.51 | -5.54 |
| IPI00794184 | 97 kDa protein | R.GVYSSDVDFIFPGTYQTLEM*FPR.T                | 4 | 4.13 | 0.29 | -4.06 |
| IPI00794184 | 97 kDa protein | R.GVYSSDVDFIFPGTYQTLEM*FPR.T                | 2 | 5.09 | 0.55 | -4.10 |
| IPI00794184 | 97 kDa protein | R.GVYSSDVDFIFPGTYQTLEM*FPR.T                | 3 | 3.98 | 0.40 | -2.99 |
| IPI00794184 | 97 kDa protein | R.HYYIAEEIWNYPAPSGIDIFTK.E                  | 3 | 4.28 | 0.32 | -6.01 |
| IPI00794184 | 97 kDa protein | R.IDTINLFPATLFDAY.M                         | 2 | 3.27 | 0.39 | -4.19 |
| IPI00794184 | 97 kDa protein | R.IDTINLFPATLFDAYM*VAQNPGCEWM*LSCQNLNHLK.A  | 3 | 5.70 | 0.44 | -4.83 |
| IPI00794184 | 97 kDa protein | R.IDTINLFPATLFDAYM*VAQNPGCEWM*LSCQNLNHLK.A  | 4 | 5.65 | 0.48 | -5.83 |
| IPI00794184 | 97 kDa protein | R.IDTINLFPATLFDAYM*VAQNPGCEWM*LSCQNLNHLK.A  | 5 | 2.84 | 0.10 | -4.92 |
| IPI00794184 | 97 kDa protein | R.IDTINLFPATLFDAYM*VAQNPGCEWMLSCQNLNHLK.A   | 3 | 5.25 | 0.15 | -3.14 |
| IPI00794184 | 97 kDa protein | R.IDTINLFPATLFDAYM*VAQNPGCEWMLSCQNLNHLK.A   | 4 | 4.04 | 0.14 | -4.54 |
| IPI00794184 | 97 kDa protein | R.IDTINLFPATLFDAYMVAQNPGCEWM*LSCQNLNHLK.A   | 4 | 5.40 | 0.13 | -3.59 |
| IPI00794184 | 97 kDa protein | R.KAEEEEHLGILGPQLHADVGDK.V                  | 2 | 5.78 | 0.48 | -3.36 |
| IPI00794184 | 97 kDa protein | R.KAEEEEHLGILGPQLHADVGDK.V                  | 3 | 6.44 | 0.54 | -6.82 |
| IPI00794184 | 97 kDa protein | R.KAEEEEHLGILGPQLHADVGDK.V                  | 4 | 4.17 | 0.39 | -3.48 |
| IPI00794184 | 97 kDa protein | R.KAEEEEHLGILGPQLHADVGDKVK.I                | 2 | 5.96 | 0.61 | -4.90 |
| IPI00794184 | 97 kDa protein | R.KAEEEEHLGILGPQLHADVGDKVK.I                | 3 | 7.25 | 0.57 | -6.07 |
| IPI00794184 | 97 kDa protein | R.KAEEEEHLGILGPQLHADVGDKVK.I                | 4 | 5.47 | 0.51 | -4.56 |
| IPI00794184 | 97 kDa protein | R.KAEEEEHLGILGPQLHADVGDKVK.I                | 5 | 4.05 | 0.40 | -3.99 |
| IPI00794184 | 97 kDa protein | R.KAEEEEHLGILGPQLHADVGDKVK.I                | 6 | 2.12 | 0.22 | -3.61 |
| IPI00794184 | 97 kDa protein | R.KLEFALLFLVFDENESWYLDNLIK.T                | 3 | 5.27 | 0.36 |       |
| IPI00794184 | 97 kDa protein | R.M*FTTAPDQVKEDEDFQESNK.M                   | 2 | 5.02 | 0.56 | -3.37 |



|             |                                              |                                           |   |      |      |       |
|-------------|----------------------------------------------|-------------------------------------------|---|------|------|-------|
| IPI00794184 | 97 kDa protein                               | R.M*FTTAPDQVDEKEDEFQESNK.M                | 3 | 3.92 | 0.47 | -3.17 |
| IPI00794184 | 97 kDa protein                               | R.M*YSVNGYTFGSLPGLSM*CAEDR.V              | 2 | 4.79 | 0.61 | -1.87 |
| IPI00794184 | 97 kDa protein                               | R.M*YSVNGYTFGSLPGLSM*CAEDR.V              | 3 | 4.87 | 0.48 | -1.64 |
| IPI00794184 | 97 kDa protein                               | R.M*YSVNGYTFGSLPGLSM*CAEDRVK.W            | 3 | 3.31 | 0.41 | -2.51 |
| IPI00794184 | 97 kDa protein                               | R.PYSIHAGVQTESSTVTPTLPGETLTYVWK.I         | 4 | 4.49 | 0.31 | -2.82 |
| IPI00794184 | 97 kDa protein                               | R.QKDVDKEFYLFPTVFDENESLLEDNIR.M           | 3 | 6.14 | 0.57 | -5.17 |
| IPI00794184 | 97 kDa protein                               | R.QKDVDKEFYLFPTVFDENESLLEDNIR.M           | 4 | 4.68 | 0.33 | -6.05 |
| IPI00794184 | 97 kDa protein                               | R.QSEDSTFYLGGER.T                         | 2 | 3.54 | 0.43 | -5.44 |
| IPI00794184 | 97 kDa protein                               | R.QYTDSTFR.V                              | 2 | 1.55 | 0.21 | -1.78 |
| IPI00794184 | 97 kDa protein                               | R.QYTDSTFRVPVER.K                         | 3 | 1.89 | 0.27 | -2.61 |
| IPI00794184 | 97 kDa protein                               | R.RQSEDSTFYLGGER.T                        | 2 | 4.60 | 0.44 | -3.84 |
| IPI00794184 | 97 kDa protein                               | R.RQSEDSTFYLGGER.T                        | 3 | 3.33 | 0.11 | -1.79 |
| IPI00794184 | 97 kDa protein                               | R.SGAGTEDSACIPWAYYSTVDQVK.D               | 2 | 5.21 | 0.51 | -5.00 |
| IPI00794184 | 97 kDa protein                               | R.SGAGTEDSACIPWAYYSTVDQVK.D               | 3 | 5.41 | 0.54 | -5.56 |
| IPI00794184 | 97 kDa protein                               | R.SGAGTEDSACIPWAYYSTVDQVKDLYSGLIGPLIVCR.R | 3 | 6.30 | 0.61 | -3.01 |
| IPI00794184 | 97 kDa protein                               | R.SGAGTEDSACIPWAYYSTVDQVKDLYSGLIGPLIVCR.R | 4 | 4.30 | 0.30 | -3.75 |
| IPI00794184 | 97 kDa protein                               | R.SVPPSASHVAPTETFT.Y                      | 2 | 2.97 | 0.46 | -2.15 |
| IPI00794184 | 97 kDa protein                               | R.SVPPSASHVAPTETFTYEWTVPK.E               | 2 | 3.33 | 0.38 | -5.37 |
| IPI00794184 | 97 kDa protein                               | R.SVPPSASHVAPTETFTYEWTVPK.E               | 3 | 3.41 | 0.36 | -5.94 |
| IPI00794184 | 97 kDa protein                               | R.VTFHNKGAYPLSIEPIGVR.F                   | 3 | 4.11 | 0.42 | -3.25 |
| IPI00794184 | 97 kDa protein                               | S.VPPSASHVAPTETFTYEWTVPK.E                | 3 | 3.74 | 0.40 | -2.98 |
| IPI00794184 | 97 kDa protein                               | V.PPSASHVAPTETFTYEWTVPK.E                 | 2 | 4.15 | 0.56 | -2.44 |
| IPI00794184 | 97 kDa protein                               | W.AYYSTVDQVK.D                            | 1 | 2.39 | 0.30 | -3.51 |
| IPI00794184 | 97 kDa protein                               | W.AYYSTVDQVK.D                            | 2 | 3.02 | 0.35 | -3.31 |
| IPI00794184 | 97 kDa protein                               | W.PDEGTGFNVECLTTDHYTGGM*K.Q               | 3 | 3.52 | 0.48 | -2.13 |
| IPI00794184 | 97 kDa protein                               | Y.LFPTVFDENESLLEDNIR.M                    | 2 | 4.27 | 0.34 | -4.81 |
| IPI00794184 | 97 kDa protein                               | Y.PLSIEPIGVR.F                            | 1 | 2.42 | 0.23 | -3.78 |
| IPI00794184 | 97 kDa protein                               | Y.PLSIEPIGVR.F                            | 2 | 3.32 | 0.15 | -2.07 |
| IPI00794450 | 9 kDa protein                                | A.LDCHVCAYNCDNCFNPM*R.C                   | 2 | 4.20 | 0.63 | -1.99 |
| IPI00794450 | 9 kDa protein                                | A.LDCHVCAYNCDNCFNPM*R.C                   | 3 | 3.91 | 0.44 | -1.28 |
| IPI00794450 | 9 kDa protein                                | R.CPAM*VAYCM*TTR.T                        | 2 | 4.22 | 0.40 | -3.81 |
| IPI00794450 | 9 kDa protein                                | R.CPAM*VAYCM*TTR.T                        | 3 | 3.79 | 0.41 | -2.04 |
| IPI00794450 | 9 kDa protein                                | R.CPAMVAYCM*TTR.T                         | 2 | 2.76 | 0.29 |       |
| IPI00794450 | 9 kDa protein                                | R.TYYTPTR.M                               | 1 | 1.72 | 0.28 | -1.29 |
| IPI00794450 | 9 kDa protein                                | R.TYYTPTR.M                               | 2 | 1.72 | 0.31 | -1.70 |
| IPI00794679 | Major histocompatibility complex, class I, B | R.FISVGYVDDTQFVR.F                        | 2 | 4.17 | 0.48 | -3.85 |
| IPI00795013 | 149 kDa protein                              | K.DSLVDVPPFNSYQYIAAVDYNPR.D               | 2 | 4.00 | 0.47 | -2.01 |
| IPI00795013 | 149 kDa protein                              | K.DSLVDVPPFNSYQYIAAVDYNPR.D               | 3 | 4.00 | 0.35 | -1.19 |
| IPI00795013 | 149 kDa protein                              | K.LPHRVDGTGFVYDYGALFFNKER.T               | 4 | 3.06 | 0.16 | -2.36 |
| IPI00795013 | 149 kDa protein                              | K.SGEAIIANANYHDTSPYR.W                    | 2 | 4.98 | 0.55 | -2.43 |
| IPI00795013 | 149 kDa protein                              | K.SGEAIIANANYHDTSPYR.W                    | 3 | 2.74 | 0.31 | -1.88 |
| IPI00795013 | 149 kDa protein                              | M.IVISQLNPYTLR.F                          | 1 | 2.56 | 0.17 | -1.54 |

|             |                                                                                   |                                      |   |      |      |       |
|-------------|-----------------------------------------------------------------------------------|--------------------------------------|---|------|------|-------|
| IPI00795013 | 149 kDa protein                                                                   | M.IVISQLNPYTLR.F                     | 2 | 3.88 | 0.38 | -4.45 |
| IPI00795013 | 149 kDa protein                                                                   | R.CPGTDVIM*IESANYGR.T                | 2 | 3.68 | 0.30 | -2.71 |
| IPI00795013 | 149 kDa protein                                                                   | R.CPGTDVIM*IESANYGR.T                | 3 | 4.20 | 0.32 | -3.93 |
| IPI00795013 | 149 kDa protein                                                                   | R.DNLLYVWNNYHVVK.Y                   | 2 | 3.62 | 0.36 | -1.84 |
| IPI00795013 | 149 kDa protein                                                                   | R.DNLLYVWNNYHVVK.Y                   | 3 | 3.03 | 0.13 | 0.34  |
| IPI00795013 | 149 kDa protein                                                                   | R.GPGAQGAQIAAQAFSR.A                 | 3 | 3.05 | 0.09 | -2.10 |
| IPI00795013 | 149 kDa protein                                                                   | R.HLLQQPAAER.T                       | 2 | 2.17 | 0.10 | -2.11 |
| IPI00795013 | 149 kDa protein                                                                   | R.IKSGEAIIANANYHDTSPYR.W             | 2 | 5.85 | 0.62 | -2.28 |
| IPI00795013 | 149 kDa protein                                                                   | R.IKSGEAIIANANYHDTSPYR.W             | 3 | 3.35 | 0.33 | -2.35 |
| IPI00795013 | 149 kDa protein                                                                   | R.SPGGALPPR.H                        | 2 | 2.54 | 0.13 | -1.72 |
| IPI00795013 | 149 kDa protein                                                                   | R.TDDKICSDPAQM*ENIR.C                | 3 | 4.29 | 0.40 | -2.56 |
| IPI00795013 | 149 kDa protein                                                                   | R.TDTLTEYSSKDDFIAGRPTTTYK.L          | 3 | 4.73 | 0.34 | -3.96 |
| IPI00795013 | 149 kDa protein                                                                   | R.TDTLTEYSSKDDFIAGRPTTTYKLPHR.V      | 3 | 5.59 | 0.41 | -3.99 |
| IPI00795013 | 149 kDa protein                                                                   | R.TDTLTEYSSKDDFIAGRPTTTYKLPHR.V      | 4 | 4.57 | 0.47 | -2.70 |
| IPI00795013 | 149 kDa protein                                                                   | R.VDGTGFVVYDGalFFNker.T              | 3 | 3.16 | 0.27 | -2.55 |
| IPI00795055 | CDNA FLJ14022 fis, clone HEMBA1003538, weakly similar to COMPLEMENT C1R COMPONENT | G.SVLLAQELPQQLTSPGYPEPYGK.G          | 2 | 3.91 | 0.31 | -2.64 |
| IPI00795055 | CDNA FLJ14022 fis, clone HEMBA1003538, weakly similar to COMPLEMENT C1R COMPONENT | G.SVLLAQELPQQLTSPGYPEPYGK.G          | 3 | 4.60 | 0.32 | -4.29 |
| IPI00795055 | CDNA FLJ14022 fis, clone HEMBA1003538, weakly similar to COMPLEMENT C1R COMPONENT | G.SVLLAQELPQQLTSPGYPEPYGKGQESSTDIK.A | 3 | 3.57 | 0.35 | -3.15 |
| IPI00795055 | CDNA FLJ14022 fis, clone HEMBA1003538, weakly similar to COMPLEMENT C1R COMPONENT | K.APEGFAVR.L                         | 2 | 2.27 | 0.18 | -2.53 |
| IPI00795055 | CDNA FLJ14022 fis, clone HEMBA1003538, weakly similar to COMPLEMENT C1R COMPONENT | K.GQESSTDIKAPEGFAVR.L                | 2 | 3.77 | 0.36 | -2.99 |
| IPI00795055 | CDNA FLJ14022 fis, clone HEMBA1003538, weakly similar to COMPLEMENT C1R COMPONENT | K.GQESSTDIKAPEGFAVR.L                | 3 | 2.87 | 0.29 | -0.89 |
| IPI00795055 | CDNA FLJ14022 fis, clone HEMBA1003538, weakly similar to COMPLEMENT C1R COMPONENT | K.LGNFPWQAFTSIHGR.G                  | 3 | 3.12 | 0.28 | -3.19 |
| IPI00795055 | CDNA FLJ14022 fis, clone HEMBA1003538, weakly similar to COMPLEMENT C1R COMPONENT | K.YSRLPVAPR.E                        | 2 | 2.72 | 0.21 | -2.77 |
| IPI00795055 | CDNA FLJ14022 fis, clone HEMBA1003538, weakly similar to COMPLEMENT C1R COMPONENT | R.GGGALLGDR.W                        | 1 | 2.35 | 0.20 | -2.80 |
| IPI00795055 | CDNA FLJ14022 fis, clone HEMBA1003538, weakly similar to COMPLEMENT C1R COMPONENT | R.GGGALLGDR.W                        | 2 | 3.11 | 0.23 | -4.75 |
| IPI00795055 | CDNA FLJ14022 fis, clone HEMBA1003538, weakly similar to COMPLEMENT C1R COMPONENT | R.GSEAINAPGDNPAK.V                   | 2 | 4.23 | 0.45 | -3.15 |
| IPI00795055 | CDNA FLJ14022 fis, clone HEMBA1003538, weakly similar to COMPLEMENT C1R COMPONENT | R.VVHPDYR.Q                          | 1 | 2.24 | 0.11 | -4.13 |
| IPI00795055 | CDNA FLJ14022 fis, clone HEMBA1003538, weakly similar to COMPLEMENT C1R COMPONENT | R.VVHPDYR.Q                          | 2 | 2.18 | 0.22 | -1.02 |

|             |                                                              |                                     |   |      |      |       |
|-------------|--------------------------------------------------------------|-------------------------------------|---|------|------|-------|
| IPI00795481 | Isoform 1 of Ly6/PLAUR domain-containing protein 1 precursor | K.EVM*EQSAGIM*YR.K                  | 2 | 2.69 | 0.43 | -4.36 |
| IPI00795918 | neural cell adhesion molecule 1 isoform 2                    | A.GEQDATIHLK.V                      | 2 | 3.03 | 0.30 | -1.92 |
| IPI00795918 | neural cell adhesion molecule 1 isoform 2                    | F.DEPEATGGVPILK.Y                   | 2 | 3.67 | 0.32 | -4.03 |
| IPI00795918 | neural cell adhesion molecule 1 isoform 2                    | G.LGEISAASEFK.T                     | 2 | 3.23 | 0.31 | -2.89 |
| IPI00795918 | neural cell adhesion molecule 1 isoform 2                    | K.AAFSKDESKEPIVEVR.T                | 2 | 5.29 | 0.51 | -3.68 |
| IPI00795918 | neural cell adhesion molecule 1 isoform 2                    | K.AAFSKDESKEPIVEVR.T                | 3 | 3.77 | 0.33 | -2.34 |
| IPI00795918 | neural cell adhesion molecule 1 isoform 2                    | K.AAHFVFR.T                         | 1 | 1.89 | 0.20 | -4.74 |
| IPI00795918 | neural cell adhesion molecule 1 isoform 2                    | K.AGEQDATIHLK.V                     | 1 | 2.90 | 0.33 | -3.39 |
| IPI00795918 | neural cell adhesion molecule 1 isoform 2                    | K.AGEQDATIHLK.V                     | 2 | 3.56 | 0.35 | -2.56 |
| IPI00795918 | neural cell adhesion molecule 1 isoform 2                    | K.CVVTGEDGSESEATVNVK.I              | 2 | 6.25 | 0.54 | -6.09 |
| IPI00795918 | neural cell adhesion molecule 1 isoform 2                    | K.DGEQIEQEEDEKEYIFSDSSQLTIK.K       | 2 | 4.76 | 0.54 | -4.93 |
| IPI00795918 | neural cell adhesion molecule 1 isoform 2                    | K.DGEQIEQEEDEKEYIFSDSSQLTIK.K       | 3 | 6.22 | 0.52 | -5.11 |
| IPI00795918 | neural cell adhesion molecule 1 isoform 2                    | K.DGEQIEQEEDEKEYIFSDSSQLTIK.K       | 4 | 4.70 | 0.42 | -5.05 |
| IPI00795918 | neural cell adhesion molecule 1 isoform 2                    | K.DGEQIEQEEDEKEYIFSDSSQLTIK.V       | 3 | 5.88 | 0.53 | -2.72 |
| IPI00795918 | neural cell adhesion molecule 1 isoform 2                    | K.DIQVIVNVPPTIQAR.Q                 | 2 | 4.79 | 0.48 | -6.05 |
| IPI00795918 | neural cell adhesion molecule 1 isoform 2                    | K.DIQVIVNVPPTIQAR.Q                 | 3 | 4.31 | 0.39 | -4.33 |
| IPI00795918 | neural cell adhesion molecule 1 isoform 2                    | K.DISWVFNPNGEK.L                    | 2 | 2.63 | 0.26 | -4.46 |
| IPI00795918 | neural cell adhesion molecule 1 isoform 2                    | K.DKDISWVFNPNGEK.L                  | 2 | 3.99 | 0.35 | -3.71 |
| IPI00795918 | neural cell adhesion molecule 1 isoform 2                    | K.EASM*EGIVTIVGLKPETTYAVR.L         | 2 | 4.36 | 0.58 | -3.07 |
| IPI00795918 | neural cell adhesion molecule 1 isoform 2                    | K.EASM*EGIVTIVGLKPETTYAVR.L         | 3 | 3.79 | 0.52 | -5.92 |
| IPI00795918 | neural cell adhesion molecule 1 isoform 2                    | K.EASM*EGIVTIVGLKPETTYAVR.L         | 4 | 3.66 | 0.26 | -3.24 |
| IPI00795918 | neural cell adhesion molecule 1 isoform 2                    | K.FFLCQVAGDAK.D                     | 1 | 2.63 | 0.36 | -3.19 |
| IPI00795918 | neural cell adhesion molecule 1 isoform 2                    | K.FFLCQVAGDAK.D                     | 2 | 3.95 | 0.44 | -4.07 |
| IPI00795918 | neural cell adhesion molecule 1 isoform 2                    | K.FFLCQVAGDAKDKDISWVFNPNGEK.L       | 4 | 3.41 | 0.37 | -2.33 |
| IPI00795918 | neural cell adhesion molecule 1 isoform 2                    | K.GLGEISAASEFK.T                    | 1 | 3.18 | 0.39 | -2.90 |
| IPI00795918 | neural cell adhesion molecule 1 isoform 2                    | K.GLGEISAASEFK.T                    | 2 | 4.33 | 0.43 | -4.36 |
| IPI00795918 | neural cell adhesion molecule 1 isoform 2                    | K.GLGEISAASEFKTQPVQGEPSAPK.L        | 3 | 4.04 | 0.44 | -2.17 |
| IPI00795918 | neural cell adhesion molecule 1 isoform 2                    | K.KVDKNDEAEYICIAENK.A               | 2 | 6.01 | 0.55 | -4.73 |
| IPI00795918 | neural cell adhesion molecule 1 isoform 2                    | K.KVDKNDEAEYICIAENK.A               | 3 | 3.66 | 0.27 | -7.79 |
| IPI00795918 | neural cell adhesion molecule 1 isoform 2                    | K.KVDKNDEAEYICIAENKAGEQDATIHLK.V    | 3 | 5.83 | 0.51 | -4.54 |
| IPI00795918 | neural cell adhesion molecule 1 isoform 2                    | K.KVDKNDEAEYICIAENKAGEQDATIHLK.V    | 4 | 5.55 | 0.36 | -4.36 |
| IPI00795918 | neural cell adhesion molecule 1 isoform 2                    | K.LEGQM*GEDGNSIK.V                  | 2 | 3.75 | 0.37 | -2.68 |
| IPI00795918 | neural cell adhesion molecule 1 isoform 2                    | K.LEGQM*GEDGNSIKVNLIK.Q             | 2 | 4.50 | 0.32 | -3.18 |
| IPI00795918 | neural cell adhesion molecule 1 isoform 2                    | K.LEGQM*GEDGNSIKVNLIK.Q             | 3 | 4.08 | 0.37 | -2.11 |
| IPI00795918 | neural cell adhesion molecule 1 isoform 2                    | K.LEGQM*GEDGNSIKVNLIKQDDGGSPIR.H    | 3 | 3.37 | 0.42 | -1.98 |
| IPI00795918 | neural cell adhesion molecule 1 isoform 2                    | K.LEGQM*GEDGNSIKVNLIKQDDGGSPIR.H    | 4 | 4.08 | 0.36 | -2.37 |
| IPI00795918 | neural cell adhesion molecule 1 isoform 2                    | K.NAPTPQEFR.E                       | 2 | 2.03 | 0.10 | -1.27 |
| IPI00795918 | neural cell adhesion molecule 1 isoform 2                    | K.NAPTPQEFREGEDAVIVCDVVSSLPPTIIWK.H | 3 | 3.76 | 0.35 | -4.99 |
| IPI00795918 | neural cell adhesion molecule 1 isoform 2                    | K.NAPTPQEFREGEDAVIVCDVVSSLPPTIIWK.H | 4 | 3.32 | 0.27 | -3.17 |
| IPI00795918 | neural cell adhesion molecule 1 isoform 2                    | K.NDEAEYICIAENK.A                   | 2 | 4.38 | 0.38 | -2.59 |
| IPI00795918 | neural cell adhesion molecule 1 isoform 2                    | K.QDDGGSPIR.H                       | 2 | 2.12 | 0.10 | -3.15 |

|             |                                           |                                              |   |      |      |       |
|-------------|-------------------------------------------|----------------------------------------------|---|------|------|-------|
| IPI00795918 | neural cell adhesion molecule 1 isoform 2 | K.SIQYTDAGEYICTASNTIGQDSQSM*YLEVQYAPK.L      | 3 | 6.42 | 0.59 | -5.27 |
| IPI00795918 | neural cell adhesion molecule 1 isoform 2 | K.SIQYTDAGEYICTASNTIGQDSQSM*YLEVQYAPK.L      | 4 | 4.90 | 0.38 | -4.13 |
| IPI00795918 | neural cell adhesion molecule 1 isoform 2 | K.SLDWNAEYEVYVVAENQQGK.S                     | 2 | 2.32 | 0.12 | -4.35 |
| IPI00795918 | neural cell adhesion molecule 1 isoform 2 | K.SLDWNAEYEVYVVAENQQGK.S                     | 3 | 3.79 | 0.34 | -4.80 |
| IPI00795918 | neural cell adhesion molecule 1 isoform 2 | K.TLDGHM*VVR.S                               | 2 | 2.49 | 0.15 | -3.95 |
| IPI00795918 | neural cell adhesion molecule 1 isoform 2 | K.TQPVGGEPSAPK.L                             | 1 | 2.13 | 0.31 | -1.47 |
| IPI00795918 | neural cell adhesion molecule 1 isoform 2 | K.TQPVGGEPSAPK.L                             | 2 | 3.10 | 0.42 | -2.41 |
| IPI00795918 | neural cell adhesion molecule 1 isoform 2 | K.TQPVGGEPSAPKLEGQM*GEDGNSIKVNLIK.Q          | 3 | 3.34 | 0.36 | -3.11 |
| IPI00795918 | neural cell adhesion molecule 1 isoform 2 | K.TQPVGGEPSAPKLEGQM*GEDGNSIKVNLIKQDDGGSPIR.H | 4 | 2.57 | 0.20 | -3.75 |
| IPI00795918 | neural cell adhesion molecule 1 isoform 2 | K.VDKNDEAEYICIAENK.A                         | 2 | 5.24 | 0.50 | -3.02 |
| IPI00795918 | neural cell adhesion molecule 1 isoform 2 | K.VDKNDEAEYICIAENK.A                         | 3 | 3.63 | 0.30 | -1.83 |
| IPI00795918 | neural cell adhesion molecule 1 isoform 2 | K.VNLIKQDDGGSPIR.H                           | 2 | 4.30 | 0.40 | -2.12 |
| IPI00795918 | neural cell adhesion molecule 1 isoform 2 | K.VNLIKQDDGGSPIR.H                           | 3 | 4.13 | 0.30 | -2.62 |
| IPI00795918 | neural cell adhesion molecule 1 isoform 2 | K.YIFSDSSQLTIK.K                             | 2 | 4.15 | 0.47 | -2.39 |
| IPI00795918 | neural cell adhesion molecule 1 isoform 2 | N.DDSSSTLIYANIDDAIYK.C                       | 2 | 3.84 | 0.55 | -2.61 |
| IPI00795918 | neural cell adhesion molecule 1 isoform 2 | N.GKGLGEISAASEFK.T                           | 3 | 4.03 | 0.38 | -2.94 |
| IPI00795918 | neural cell adhesion molecule 1 isoform 2 | R.AVGEEVWHSK.W                               | 2 | 3.32 | 0.28 | -3.06 |
| IPI00795918 | neural cell adhesion molecule 1 isoform 2 | R.DGQLLPSSNYSNIK.I                           | 2 | 3.47 | 0.25 | -3.51 |
| IPI00795918 | neural cell adhesion molecule 1 isoform 2 | R.EGEDAVIVCDVSSLPPTIIWK.H                    | 2 | 5.59 | 0.53 | -4.50 |
| IPI00795918 | neural cell adhesion molecule 1 isoform 2 | R.EGEDAVIVCDVSSLPPTIIWK.H                    | 3 | 2.34 | 0.08 | -4.13 |
| IPI00795918 | neural cell adhesion molecule 1 isoform 2 | R.EGEDAVIVCDVSSLPPTIIWK.H                    | 4 | 3.82 | 0.36 | -3.36 |
| IPI00795918 | neural cell adhesion molecule 1 isoform 2 | R.FIVLSNNYLQIR.G                             | 2 | 4.01 | 0.39 | -7.15 |
| IPI00795918 | neural cell adhesion molecule 1 isoform 2 | R.GEINFKDIQVIVNVPPTIAR.Q                     | 2 | 5.43 | 0.59 | -4.13 |
| IPI00795918 | neural cell adhesion molecule 1 isoform 2 | R.GEINFKDIQVIVNVPPTIAR.Q                     | 3 | 4.42 | 0.39 | -5.06 |
| IPI00795918 | neural cell adhesion molecule 1 isoform 2 | R.GEINFKDIQVIVNVPPTIAR.Q                     | 4 | 2.71 | 0.18 | -1.91 |
| IPI00795918 | neural cell adhesion molecule 1 isoform 2 | R.GIKKTDEGTYR.C                              | 2 | 2.95 | 0.34 | -3.93 |
| IPI00795918 | neural cell adhesion molecule 1 isoform 2 | R.GIKKTDEGTYR.C                              | 3 | 2.61 | 0.34 | -4.35 |
| IPI00795918 | neural cell adhesion molecule 1 isoform 2 | R.ISVVWNDSSSTLIYANIDDAIYK.C                  | 2 | 4.49 | 0.59 | -2.66 |
| IPI00795918 | neural cell adhesion molecule 1 isoform 2 | R.ISVVWNDSSSTLIYANIDDAIYK.C                  | 3 | 5.19 | 0.49 | -3.59 |
| IPI00795918 | neural cell adhesion molecule 1 isoform 2 | R.LAALNGK.G                                  | 1 | 2.28 | 0.16 | -2.04 |
| IPI00795918 | neural cell adhesion molecule 1 isoform 2 | R.LPSGSDHVM*LK.S                             | 1 | 1.94 | 0.35 | -3.98 |
| IPI00795918 | neural cell adhesion molecule 1 isoform 2 | R.LPSGSDHVM*LK.S                             | 2 | 3.66 | 0.42 | -2.95 |
| IPI00795918 | neural cell adhesion molecule 1 isoform 2 | R.LPSGSDHVM*LK.S                             | 3 | 1.47 | 0.11 | -4.06 |
| IPI00795918 | neural cell adhesion molecule 1 isoform 2 | R.VSSLTLK.S                                  | 1 | 1.40 | 0.06 | -2.60 |
| IPI00795918 | neural cell adhesion molecule 1 isoform 2 | S.LQVDIVPSQGEISVGESK.F                       | 2 | 5.67 | 0.58 | -5.77 |
| IPI00795918 | neural cell adhesion molecule 1 isoform 2 | S.LQVDIVPSQGEISVGESK.F                       | 3 | 4.76 | 0.48 | -3.15 |
| IPI00795918 | neural cell adhesion molecule 1 isoform 2 | W.NDDSSSTLIYANIDDAIYK.C                      | 2 | 4.76 | 0.55 | -4.60 |
| IPI00795918 | neural cell adhesion molecule 1 isoform 2 | W.NDDSSSTLIYANIDDAIYK.C                      | 3 | 4.89 | 0.47 | -0.99 |
| IPI00796279 | 25 kDa protein                            | A.GFEWNEGDGAGTTPSPGLQPAHLTFPLDYHLNQPFIFVLR.D | 4 | 5.08 | 0.43 | -3.07 |
| IPI00796279 | 25 kDa protein                            | D.TDTGALLFIGK.I                              | 2 | 3.79 | 0.30 | -3.08 |
| IPI00796279 | 25 kDa protein                            | K.IAQLPLTGSM*SIIFLPLK.V                      | 2 | 6.12 | 0.55 | -5.63 |
| IPI00796279 | 25 kDa protein                            | K.IAQLPLTGSM*SIIFLPLK.V                      | 3 | 5.23 | 0.38 | -6.60 |

|             |                |                                              |   |      |      |       |
|-------------|----------------|----------------------------------------------|---|------|------|-------|
| IPI00796279 | 25 kDa protein | K.IAQLPLTGSMSSIIFFLPLK.V                     | 2 | 6.19 | 0.55 | -3.70 |
| IPI00796279 | 25 kDa protein | K.IAQLPLTGSMSSIIFFLPLK.V                     | 3 | 3.66 | 0.29 | -3.24 |
| IPI00796279 | 25 kDa protein | K.ITGKPIKLTQVEHR.A                           | 2 | 3.89 | 0.33 | -4.20 |
| IPI00796279 | 25 kDa protein | K.ITGKPIKLTQVEHR.A                           | 3 | 3.00 | 0.27 | -3.43 |
| IPI00796279 | 25 kDa protein | K.ITGKPIKLTQVEHR.A                           | 4 | 2.49 | 0.19 | -5.10 |
| IPI00796279 | 25 kDa protein | K.LKLSYEGEVTK.S                              | 1 | 2.83 | 0.31 | -3.52 |
| IPI00796279 | 25 kDa protein | K.LKLSYEGEVTK.S                              | 2 | 3.96 | 0.43 | -7.04 |
| IPI00796279 | 25 kDa protein | K.LKLSYEGEVTK.S                              | 3 | 4.20 | 0.32 | -5.10 |
| IPI00796279 | 25 kDa protein | K.LQSLFDSPDFSK.I                             | 1 | 2.94 | 0.48 | -4.30 |
| IPI00796279 | 25 kDa protein | K.LQSLFDSPDFSK.I                             | 2 | 4.06 | 0.42 | -5.19 |
| IPI00796279 | 25 kDa protein | K.LQSLFDSPDFSKITGKPIK.L                      | 3 | 2.59 | 0.08 | -3.33 |
| IPI00796279 | 25 kDa protein | K.LQSLFDSPDFSKITGKPIK.L                      | 4 | 3.59 | 0.29 | -3.05 |
| IPI00796279 | 25 kDa protein | K.LSYEGEVTK.S                                | 1 | 2.17 | 0.12 | -4.17 |
| IPI00796279 | 25 kDa protein | K.LSYEGEVTK.S                                | 2 | 2.84 | 0.29 | -2.14 |
| IPI00796279 | 25 kDa protein | K.SLQEM*KLQSLFDSPDFSK.I                      | 2 | 4.18 | 0.44 | -2.61 |
| IPI00796279 | 25 kDa protein | K.SLQEM*KLQSLFDSPDFSK.I                      | 3 | 4.34 | 0.43 | -2.87 |
| IPI00796279 | 25 kDa protein | K.TSLEDFYLDEER.T                             | 1 | 1.71 | 0.37 | -3.08 |
| IPI00796279 | 25 kDa protein | K.TSLEDFYLDEER.T                             | 2 | 4.45 | 0.48 | -4.30 |
| IPI00796279 | 25 kDa protein | K.TSLEDFYLDEERTVR.V                          | 3 | 2.63 | 0.22 | -2.48 |
| IPI00796279 | 25 kDa protein | K.TVQAVLTVPK.L                               | 1 | 1.59 | 0.13 | 0.02  |
| IPI00796279 | 25 kDa protein | K.TVQAVLTVPK.L                               | 2 | 3.59 | 0.37 | -3.83 |
| IPI00796279 | 25 kDa protein | K.VTQNLTLIEESLTSEFIHDIDRELK.T                | 4 | 3.44 | 0.12 | -4.69 |
| IPI00796279 | 25 kDa protein | L.TGSM*SIIFFLPLK.V                           | 2 | 3.30 | 0.30 | -4.28 |
| IPI00796279 | 25 kDa protein | M.KLQSLFDSPDFSK.I                            | 2 | 4.13 | 0.44 | -3.38 |
| IPI00796279 | 25 kDa protein | M.SIIFFLPLK.V                                | 2 | 3.12 | 0.22 | -2.59 |
| IPI00796279 | 25 kDa protein | Q.SLFDSPDFSK.I                               | 1 | 2.35 | 0.25 | -3.34 |
| IPI00796279 | 25 kDa protein | R.AGFEWNEDGAGTTPSPGLQPAHLTFPLDYHLNQPF.I      | 3 | 5.31 | 0.49 | -3.73 |
| IPI00796279 | 25 kDa protein | R.AGFEWNEDGAGTTPSPGLQPAHLTFPLDYHLNQPFIFVLR.D | 3 | 7.10 | 0.63 | -4.17 |
| IPI00796279 | 25 kDa protein | R.AGFEWNEDGAGTTPSPGLQPAHLTFPLDYHLNQPFIFVLR.D | 4 | 6.33 | 0.48 | -6.46 |
| IPI00796279 | 25 kDa protein | R.DTDTGALLFIGK.I                             | 1 | 3.01 | 0.31 | -6.00 |
| IPI00796279 | 25 kDa protein | R.DTDTGALLFIGK.I                             | 2 | 4.35 | 0.42 | -4.50 |
| IPI00796279 | 25 kDa protein | R.DTDTGALLFIGK.I                             | 3 | 3.45 | 0.08 | -3.45 |
| IPI00796279 | 25 kDa protein | R.DTDTGALLFIGKILDPR.G                        | 3 | 3.34 | 0.33 | -4.32 |
| IPI00796279 | 25 kDa protein | R.DTDTGALLFIGKILDPRGP.-                      | 3 | 5.01 | 0.42 | -3.68 |
| IPI00796279 | 25 kDa protein | R.ELKTVQAVLTVPK.L                            | 2 | 4.10 | 0.35 | -3.59 |
| IPI00796279 | 25 kDa protein | R.KTSLEDFYLDEER.T                            | 1 | 3.58 | 0.50 | -2.73 |
| IPI00796279 | 25 kDa protein | R.KTSLEDFYLDEER.T                            | 2 | 4.61 | 0.47 | -5.64 |
| IPI00796279 | 25 kDa protein | R.KTSLEDFYLDEER.T                            | 3 | 4.17 | 0.35 | -2.91 |
| IPI00796279 | 25 kDa protein | R.KTSLEDFYLDEERTVR.V                         | 2 | 3.85 | 0.38 | -3.47 |
| IPI00796279 | 25 kDa protein | R.TVRVPM*M*SDPK.A                            | 3 | 1.89 | 0.11 | -1.64 |
| IPI00796279 | 25 kDa protein | R.YGLDSDLCK.I                                | 1 | 2.77 | 0.44 | -3.90 |
| IPI00796279 | 25 kDa protein | R.YGLDSDLCK.I                                | 2 | 3.26 | 0.46 | -2.41 |

|             |                                |                                                  |   |      |      |       |
|-------------|--------------------------------|--------------------------------------------------|---|------|------|-------|
| IPI00796279 | 25 kDa protein                 | S.PGLQPAHLTFPLDYHLNQPFIFVLR.D                    | 3 | 5.56 | 0.52 | -3.26 |
| IPI00796279 | 25 kDa protein                 | T.PSPGLQPAHLTFPLDYHLNQPFIFVLR.D                  | 3 | 5.45 | 0.52 | -4.01 |
| IPI00796279 | 25 kDa protein                 | V.QAVLTVPK.L                                     | 1 | 1.90 | 0.22 | 0.63  |
| IPI00796279 | 25 kDa protein                 | W.NEDGAGTTPSPGLQPAHLTFPLDYHLNQPFIFVLR.D          | 3 | 3.86 | 0.33 | -5.48 |
| IPI00796279 | 25 kDa protein                 | W.NEDGAGTTPSPGLQPAHLTFPLDYHLNQPFIFVLR.D          | 4 | 4.77 | 0.49 | -2.62 |
| IPI00796647 | HIG1 domain family, member 1C  | R.DSPFVPIGIAGFVTVVSCGLYKLK.Y                     | 3 | 2.91 | 0.09 | -6.41 |
| IPI00796777 | 17 kDa protein                 | R.LAKLLASLLR.C                                   | 2 | 1.05 | 0.06 | -3.11 |
| IPI00796906 | 8 kDa protein                  | -.MSLPRAEEPMMGVGRRLEGSPSK.L                      | 3 | 2.68 | 0.12 | -4.16 |
| IPI00797310 | 14 kDa protein                 | -.MRTAVTRR.W                                     | 1 | 1.90 | 0.14 |       |
| IPI00797694 | 3 kDa protein                  | -3.M*DSTLLPSSSQVPSLVKMEK.L                       | 3 | 3.39 | 0.10 |       |
| IPI00797699 | 20 kDa protein                 | R.AVTPTCATPAGPM*PCSR.L                           | 3 | 2.21 | 0.22 |       |
| IPI00798430 | Transferrin variant (Fragment) | C.GCSTLNQYFGYSGAFK.C                             | 2 | 4.92 | 0.36 |       |
| IPI00798430 | Transferrin variant (Fragment) | C.PGCGCSTLNQYFGYSGAFK.C                          | 2 | 5.87 | 0.52 |       |
| IPI00798430 | Transferrin variant (Fragment) | I.PIGLLYCDLPEPR.K                                | 2 | 4.97 | 0.37 |       |
| IPI00798430 | Transferrin variant (Fragment) | K.ADRDQYELLCLDNTR.K                              | 1 | 2.47 | 0.30 |       |
| IPI00798430 | Transferrin variant (Fragment) | K.ADRDQYELLCLDNTR.K                              | 2 | 4.69 | 0.38 |       |
| IPI00798430 | Transferrin variant (Fragment) | K.ADRDQYELLCLDNTR.K                              | 3 | 4.35 | 0.14 |       |
| IPI00798430 | Transferrin variant (Fragment) | K.ADRDQYELLCLDNTRKPVDEYK.D                       | 2 | 3.42 | 0.05 |       |
| IPI00798430 | Transferrin variant (Fragment) | K.ADRDQYELLCLDNTRKPVDEYK.D                       | 3 | 4.63 | 0.31 |       |
| IPI00798430 | Transferrin variant (Fragment) | K.ASYLDCIR.A                                     | 1 | 2.22 | 0.20 |       |
| IPI00798430 | Transferrin variant (Fragment) | K.ASYLDCIR.A                                     | 2 | 2.90 | 0.21 |       |
| IPI00798430 | Transferrin variant (Fragment) | K.AVANFFSGSCAPCADGTFPQLCQLCPGCGCSTLNQYFGYSGAFK.C | 3 | 5.36 | 0.47 |       |
| IPI00798430 | Transferrin variant (Fragment) | K.CDEWSVNSVGK.I                                  | 2 | 3.09 | 0.18 |       |
| IPI00798430 | Transferrin variant (Fragment) | K.CDEWSVNSVGKIECVSAETTEDCIAK.I                   | 3 | 4.79 | 0.41 |       |
| IPI00798430 | Transferrin variant (Fragment) | K.CGLVPVLAENYNKSDNCEDTPEAGYFAVAVVK.K             | 3 | 5.48 | 0.43 |       |
| IPI00798430 | Transferrin variant (Fragment) | K.CGLVPVLAENYNKSDNCEDTPEAGYFAVAVVK.S             | 3 | 4.90 | 0.46 |       |
| IPI00798430 | Transferrin variant (Fragment) | K.CLKDGAGDVAFVK.H                                | 1 | 3.55 | 0.38 |       |
| IPI00798430 | Transferrin variant (Fragment) | K.CLKDGAGDVAFVK.H                                | 2 | 4.53 | 0.42 |       |
| IPI00798430 | Transferrin variant (Fragment) | K.CLKDGAGDVAFVK.H                                | 3 | 5.11 | 0.36 |       |
| IPI00798430 | Transferrin variant (Fragment) | K.CSTSSLLEACTFR.R                                | 1 | 3.44 | 0.39 |       |
| IPI00798430 | Transferrin variant (Fragment) | K.CSTSSLLEACTFR.R                                | 2 | 5.47 | 0.44 |       |
| IPI00798430 | Transferrin variant (Fragment) | K.CSTSSLLEACTFR.R                                | 3 | 3.48 | 0.17 |       |
| IPI00798430 | Transferrin variant (Fragment) | K.DCHLAQVPSHTVVAR.S                              | 2 | 4.42 | 0.31 |       |
| IPI00798430 | Transferrin variant (Fragment) | K.DCHLAQVPSHTVVAR.S                              | 3 | 3.94 | 0.35 |       |
| IPI00798430 | Transferrin variant (Fragment) | K.DGAGDVAFVK.H                                   | 1 | 2.34 | 0.13 |       |
| IPI00798430 | Transferrin variant (Fragment) | K.DGAGDVAFVK.H                                   | 2 | 3.46 | 0.26 | -3.05 |
| IPI00798430 | Transferrin variant (Fragment) | K.DKSKEFQLFSSPHGK.D                              | 2 | 2.51 | 0.28 |       |
| IPI00798430 | Transferrin variant (Fragment) | K.DKSKEFQLFSSPHGKDLLFK.D                         | 2 | 6.23 | 0.42 |       |
| IPI00798430 | Transferrin variant (Fragment) | K.DKSKEFQLFSSPHGKDLLFK.D                         | 3 | 5.24 | 0.40 |       |
| IPI00798430 | Transferrin variant (Fragment) | K.DLLFKDSAHGFLK.V                                | 1 | 3.62 | 0.41 |       |
| IPI00798430 | Transferrin variant (Fragment) | K.DLLFKDSAHGFLK.V                                | 2 | 4.38 | 0.40 |       |
| IPI00798430 | Transferrin variant (Fragment) | K.DLLFKDSAHGFLK.V                                | 3 | 3.49 | 0.26 |       |

|             |                                |                                       |   |      |      |       |
|-------------|--------------------------------|---------------------------------------|---|------|------|-------|
| IPI00798430 | Transferrin variant (Fragment) | K.DLLFKDSAHGFLKVPPR.M                 | 2 | 5.13 | 0.48 |       |
| IPI00798430 | Transferrin variant (Fragment) | K.DLLFKDSAHGFLKVPPR.M                 | 3 | 5.34 | 0.41 |       |
| IPI00798430 | Transferrin variant (Fragment) | K.DLLFKDSAHGFLKVPPRM*DAK.M            | 3 | 4.19 | 0.13 |       |
| IPI00798430 | Transferrin variant (Fragment) | K.DLLFRDDTVCLAK.L                     | 1 | 3.27 | 0.33 |       |
| IPI00798430 | Transferrin variant (Fragment) | K.DLLFRDDTVCLAK.L                     | 2 | 3.85 | 0.32 |       |
| IPI00798430 | Transferrin variant (Fragment) | K.DLLFRDDTVCLAK.L                     | 3 | 3.82 | 0.32 |       |
| IPI00798430 | Transferrin variant (Fragment) | K.DSAHGFLK.V                          | 1 | 2.44 | 0.24 |       |
| IPI00798430 | Transferrin variant (Fragment) | K.DSAHGFLK.V                          | 2 | 2.40 | 0.15 |       |
| IPI00798430 | Transferrin variant (Fragment) | K.DSAHGFLKVPPR.M                      | 1 | 3.52 | 0.21 |       |
| IPI00798430 | Transferrin variant (Fragment) | K.DSAHGFLKVPPR.M                      | 2 | 3.23 | 0.23 |       |
| IPI00798430 | Transferrin variant (Fragment) | K.DSAHGFLKVPPR.M                      | 3 | 4.65 | 0.18 |       |
| IPI00798430 | Transferrin variant (Fragment) | K.DSAHGFLKVPPRM*DAK.M                 | 2 | 3.69 | 0.34 |       |
| IPI00798430 | Transferrin variant (Fragment) | K.DSAHGFLKVPPRM*DAK.M                 | 3 | 2.58 | 0.18 |       |
| IPI00798430 | Transferrin variant (Fragment) | K.DSGFQM*NQLR.G                       | 2 | 2.65 | 0.22 | -2.60 |
| IPI00798430 | Transferrin variant (Fragment) | K.DSGFQMNQLR.G                        | 1 | 2.50 | 0.17 |       |
| IPI00798430 | Transferrin variant (Fragment) | K.DSGFQMNQLR.G                        | 2 | 3.91 | 0.24 |       |
| IPI00798430 | Transferrin variant (Fragment) | K.DSSLCKLCM*GSGLNLCEPNNK.E            | 3 | 4.68 | 0.27 |       |
| IPI00798430 | Transferrin variant (Fragment) | K.DSSLCKLCM*GSGLNLCEPNNKEGYYGYTGAFR.C | 3 | 5.02 | 0.40 |       |
| IPI00798430 | Transferrin variant (Fragment) | K.DSSLCKLCMGSGLNLCEPNNKEGYYGYTGAFR.C  | 3 | 3.70 | 0.21 |       |
| IPI00798430 | Transferrin variant (Fragment) | K.DYELLCLDGTR.K                       | 1 | 2.92 | 0.22 |       |
| IPI00798430 | Transferrin variant (Fragment) | K.DYELLCLDGTR.K                       | 2 | 4.14 | 0.40 |       |
| IPI00798430 | Transferrin variant (Fragment) | K.DYELLCLDGTRKPVVEYANCHLAR.A          | 3 | 5.46 | 0.41 |       |
| IPI00798430 | Transferrin variant (Fragment) | K.EDLIWELLNQAQEHFGK.D                 | 2 | 4.72 | 0.33 |       |
| IPI00798430 | Transferrin variant (Fragment) | K.EDLIWELLNQAQEHFGK.D                 | 3 | 2.14 | 0.21 |       |
| IPI00798430 | Transferrin variant (Fragment) | K.EDLIWELLNQAQEHFGKDK.S               | 2 | 4.78 | 0.43 |       |
| IPI00798430 | Transferrin variant (Fragment) | K.EDLIWELLNQAQEHFGKDK.S               | 3 | 2.30 | 0.17 |       |
| IPI00798430 | Transferrin variant (Fragment) | K.EDPQTFYYAVAVVK.K                    | 1 | 3.73 | 0.16 |       |
| IPI00798430 | Transferrin variant (Fragment) | K.EDPQTFYYAVAVVK.K                    | 2 | 4.48 | 0.45 |       |
| IPI00798430 | Transferrin variant (Fragment) | K.EDPQTFYYAVAVVK.K                    | 3 | 5.24 | 0.33 |       |
| IPI00798430 | Transferrin variant (Fragment) | K.EDPQTFYYAVAVVKK.D                   | 1 | 3.33 | 0.15 |       |
| IPI00798430 | Transferrin variant (Fragment) | K.EDPQTFYYAVAVVKK.D                   | 2 | 4.43 | 0.42 |       |
| IPI00798430 | Transferrin variant (Fragment) | K.EFQLFSSPHGK.D                       | 1 | 3.05 | 0.29 |       |
| IPI00798430 | Transferrin variant (Fragment) | K.EFQLFSSPHGK.D                       | 2 | 3.63 | 0.30 |       |
| IPI00798430 | Transferrin variant (Fragment) | K.EFQLFSSPHGKDLLFK.D                  | 2 | 5.05 | 0.33 |       |
| IPI00798430 | Transferrin variant (Fragment) | K.EFQLFSSPHGKDLLFKDSAHGFLK.V          | 2 | 5.13 | 0.28 |       |
| IPI00798430 | Transferrin variant (Fragment) | K.EFQLFSSPHGKDLLFKDSAHGFLK.V          | 3 | 6.53 | 0.38 |       |
| IPI00798430 | Transferrin variant (Fragment) | K.EGYYGYTGAFR.C                       | 1 | 2.71 | 0.37 |       |
| IPI00798430 | Transferrin variant (Fragment) | K.EGYYGYTGAFR.C                       | 2 | 3.44 | 0.40 |       |
| IPI00798430 | Transferrin variant (Fragment) | K.GDVAFVKHQTVPQNTGGK.N                | 2 | 4.66 | 0.33 |       |
| IPI00798430 | Transferrin variant (Fragment) | K.GDVAFVKHQTVPQNTGGK.N                | 3 | 4.60 | 0.30 |       |
| IPI00798430 | Transferrin variant (Fragment) | K.GDVAFVKHQTVPQNTGGKNPDPWAK.N         | 3 | 3.41 | 0.17 |       |
| IPI00798430 | Transferrin variant (Fragment) | K.HQTVPQNTGGK.N                       | 2 | 2.73 | 0.18 |       |

|             |                                |                                      |   |      |      |       |
|-------------|--------------------------------|--------------------------------------|---|------|------|-------|
| IPI00798430 | Transferrin variant (Fragment) | K.HSTIFENLANK.A                      | 1 | 3.58 | 0.34 |       |
| IPI00798430 | Transferrin variant (Fragment) | K.HSTIFENLANK.A                      | 2 | 3.99 | 0.39 |       |
| IPI00798430 | Transferrin variant (Fragment) | K.HSTIFENLANK.A                      | 3 | 4.47 | 0.21 |       |
| IPI00798430 | Transferrin variant (Fragment) | K.HSTIFENLANKADR.D                   | 2 | 4.56 | 0.45 |       |
| IPI00798430 | Transferrin variant (Fragment) | K.HSTIFENLANKADR.D                   | 3 | 4.65 | 0.42 |       |
| IPI00798430 | Transferrin variant (Fragment) | K.HSTIFENLANKADRQYELLCLDNTR.K        | 2 | 3.87 | 0.38 |       |
| IPI00798430 | Transferrin variant (Fragment) | K.HSTIFENLANKADRQYELLCLDNTR.K        | 3 | 4.88 | 0.43 |       |
| IPI00798430 | Transferrin variant (Fragment) | K.HSTIFENLANKADRQYELLCLDNTRKPVDEYK.D | 3 | 4.62 | 0.35 |       |
| IPI00798430 | Transferrin variant (Fragment) | K.IECVSAETTEDCIAK.I                  | 1 | 3.64 | 0.39 |       |
| IPI00798430 | Transferrin variant (Fragment) | K.IECVSAETTEDCIAK.I                  | 2 | 5.60 | 0.44 |       |
| IPI00798430 | Transferrin variant (Fragment) | K.IECVSAETTEDCIAK.I                  | 3 | 3.28 | 0.22 |       |
| IPI00798430 | Transferrin variant (Fragment) | K.IM*NGEADAM*SLDGGFVYIAGK.C          | 2 | 6.64 | 0.54 |       |
| IPI00798430 | Transferrin variant (Fragment) | K.IM*NGEADAM*SLDGGFVYIAGK.C          | 3 | 6.66 | 0.46 |       |
| IPI00798430 | Transferrin variant (Fragment) | K.IM*NGEADAMSLDGGFVYIAGK.C           | 2 | 6.50 | 0.40 |       |
| IPI00798430 | Transferrin variant (Fragment) | K.IM*NGEADAMSLDGGFVYIAGK.C           | 3 | 6.92 | 0.21 |       |
| IPI00798430 | Transferrin variant (Fragment) | K.IMNGEADAM*SLDGGFVYIAGK.C           | 2 | 5.87 | 0.30 |       |
| IPI00798430 | Transferrin variant (Fragment) | K.IMNGEADAMSLDGGFVYIAGK.C            | 2 | 5.46 | 0.48 |       |
| IPI00798430 | Transferrin variant (Fragment) | K.IMNGEADAMSLDGGFVYIAGK.C            | 3 | 3.99 | 0.12 |       |
| IPI00798430 | Transferrin variant (Fragment) | K.INHCRFDEFFSEGCAPGSK.K              | 2 | 4.50 | 0.34 |       |
| IPI00798430 | Transferrin variant (Fragment) | K.INHCRFDEFFSEGCAPGSK.K              | 3 | 5.17 | 0.35 |       |
| IPI00798430 | Transferrin variant (Fragment) | K.KASYLDCIR.A                        | 1 | 2.15 | 0.24 |       |
| IPI00798430 | Transferrin variant (Fragment) | K.KASYLDCIR.A                        | 2 | 3.09 | 0.17 |       |
| IPI00798430 | Transferrin variant (Fragment) | K.KDSGFQM*NQLR.G                     | 2 | 3.50 | 0.34 |       |
| IPI00798430 | Transferrin variant (Fragment) | K.KDSGFQM*NQLR.G                     | 3 | 3.68 | 0.11 |       |
| IPI00798430 | Transferrin variant (Fragment) | K.KSASDLTWDNLK.G                     | 1 | 2.83 | 0.21 |       |
| IPI00798430 | Transferrin variant (Fragment) | K.KSASDLTWDNLK.G                     | 2 | 3.34 | 0.17 |       |
| IPI00798430 | Transferrin variant (Fragment) | K.LCM*GSGLNLCEPNNK.E                 | 1 | 3.10 | 0.38 |       |
| IPI00798430 | Transferrin variant (Fragment) | K.LCM*GSGLNLCEPNNK.E                 | 2 | 4.71 | 0.40 |       |
| IPI00798430 | Transferrin variant (Fragment) | K.LCM*GSGLNLCEPNNK.E                 | 3 | 4.47 | 0.13 |       |
| IPI00798430 | Transferrin variant (Fragment) | K.LCM*GSGLNLCEPNNKEGYYGYTGAFR.C      | 2 | 4.02 | 0.45 |       |
| IPI00798430 | Transferrin variant (Fragment) | K.LCM*GSGLNLCEPNNKEGYYGYTGAFR.C      | 3 | 6.00 | 0.50 |       |
| IPI00798430 | Transferrin variant (Fragment) | K.LCMGSGLNLCEPNNK.E                  | 2 | 4.18 | 0.40 |       |
| IPI00798430 | Transferrin variant (Fragment) | K.LCMGSGLNLCEPNNKEGYYGYTGAFR.C       | 2 | 4.13 | 0.44 |       |
| IPI00798430 | Transferrin variant (Fragment) | K.LCMGSGLNLCEPNNKEGYYGYTGAFR.C       | 3 | 5.65 | 0.49 |       |
| IPI00798430 | Transferrin variant (Fragment) | K.LHDRNTYEK.Y                        | 2 | 2.90 | 0.22 |       |
| IPI00798430 | Transferrin variant (Fragment) | K.LHDRNTYEKYLGE EYV.K.A              | 2 | 4.85 | 0.42 |       |
| IPI00798430 | Transferrin variant (Fragment) | K.LHDRNTYEKYLGE EYV.K.A              | 3 | 5.29 | 0.27 |       |
| IPI00798430 | Transferrin variant (Fragment) | K.M*YLGYEYVTAIR.N                    | 2 | 3.62 | 0.43 | -3.23 |
| IPI00798430 | Transferrin variant (Fragment) | K.M*YLGYEYVTAIR.N                    | 3 | 4.11 | 0.27 |       |
| IPI00798430 | Transferrin variant (Fragment) | K.MYLGYEYVTAIR.N                     | 1 | 2.50 | 0.33 |       |
| IPI00798430 | Transferrin variant (Fragment) | K.MYLGYEYVTAIR.N                     | 2 | 4.77 | 0.51 |       |
| IPI00798430 | Transferrin variant (Fragment) | K.MYLGYEYVTAIR.N                     | 3 | 4.25 | 0.21 |       |



|             |                                |                                            |   |      |      |  |
|-------------|--------------------------------|--------------------------------------------|---|------|------|--|
| IPI00798430 | Transferrin variant (Fragment) | K.NLNEKDYELLCLDGTR.K                       | 1 | 4.09 | 0.45 |  |
| IPI00798430 | Transferrin variant (Fragment) | K.NLNEKDYELLCLDGTR.K                       | 2 | 5.45 | 0.49 |  |
| IPI00798430 | Transferrin variant (Fragment) | K.NLNEKDYELLCLDGTR.K                       | 3 | 4.73 | 0.30 |  |
| IPI00798430 | Transferrin variant (Fragment) | K.NLNEKDYELLCLDGTRKPVVEYANCHLAR.A          | 3 | 5.29 | 0.45 |  |
| IPI00798430 | Transferrin variant (Fragment) | K.SASDLTWDNLK.G                            | 1 | 2.55 | 0.35 |  |
| IPI00798430 | Transferrin variant (Fragment) | K.SASDLTWDNLK.G                            | 2 | 4.05 | 0.37 |  |
| IPI00798430 | Transferrin variant (Fragment) | K.SASDLTWDNLK.GK.K                         | 1 | 3.04 | 0.26 |  |
| IPI00798430 | Transferrin variant (Fragment) | K.SASDLTWDNLK.GK.K                         | 2 | 4.50 | 0.32 |  |
| IPI00798430 | Transferrin variant (Fragment) | K.SDNCEDTPEAGYFAVAVVK.K                    | 2 | 5.62 | 0.51 |  |
| IPI00798430 | Transferrin variant (Fragment) | K.SDNCEDTPEAGYFAVAVVK.K                    | 3 | 4.02 | 0.37 |  |
| IPI00798430 | Transferrin variant (Fragment) | K.SDNCEDTPEAGYFAVAVVK.S                    | 2 | 5.16 | 0.46 |  |
| IPI00798430 | Transferrin variant (Fragment) | K.SDNCEDTPEAGYFAVAVVK.S                    | 3 | 4.23 | 0.47 |  |
| IPI00798430 | Transferrin variant (Fragment) | K.SKEFQLFSSPHGK.D                          | 1 | 2.23 | 0.41 |  |
| IPI00798430 | Transferrin variant (Fragment) | K.SKEFQLFSSPHGK.D                          | 2 | 4.94 | 0.42 |  |
| IPI00798430 | Transferrin variant (Fragment) | K.SKEFQLFSSPHGK.D                          | 3 | 4.19 | 0.35 |  |
| IPI00798430 | Transferrin variant (Fragment) | K.SKEFQLFSSPHGKDLLFK.D                     | 2 | 4.96 | 0.36 |  |
| IPI00798430 | Transferrin variant (Fragment) | K.SKEFQLFSSPHGKDLLFK.D                     | 3 | 4.78 | 0.22 |  |
| IPI00798430 | Transferrin variant (Fragment) | K.SKEFQLFSSPHGKDLLFKDSAHGFLK.V             | 3 | 7.69 | 0.50 |  |
| IPI00798430 | Transferrin variant (Fragment) | K.SVIPSDGPSVACVK.K                         | 1 | 2.77 | 0.31 |  |
| IPI00798430 | Transferrin variant (Fragment) | K.SVIPSDGPSVACVK.K                         | 2 | 3.28 | 0.43 |  |
| IPI00798430 | Transferrin variant (Fragment) | K.SVIPSDGPSVACVKK.A                        | 1 | 1.71 | 0.21 |  |
| IPI00798430 | Transferrin variant (Fragment) | K.SVIPSDGPSVACVKK.A                        | 2 | 2.84 | 0.31 |  |
| IPI00798430 | Transferrin variant (Fragment) | K.YLGEEYVK.A                               | 1 | 2.18 | 0.20 |  |
| IPI00798430 | Transferrin variant (Fragment) | K.YLGEEYVK.A                               | 2 | 2.96 | 0.24 |  |
| IPI00798430 | Transferrin variant (Fragment) | N.SVGKIECVSAETTEDCIAK.I                    | 2 | 6.35 | 0.47 |  |
| IPI00798430 | Transferrin variant (Fragment) | R.AIAANEADAVTLDAGLVYDAYLAPNNLKPEVAEFYGSK.E | 3 | 6.29 | 0.35 |  |
| IPI00798430 | Transferrin variant (Fragment) | R.APNHAVVTR.K                              | 1 | 2.54 | 0.24 |  |
| IPI00798430 | Transferrin variant (Fragment) | R.APNHAVVTR.K                              | 2 | 3.09 | 0.42 |  |
| IPI00798430 | Transferrin variant (Fragment) | R.CLVEKGDVAFVK.H                           | 1 | 3.66 | 0.38 |  |
| IPI00798430 | Transferrin variant (Fragment) | R.CLVEKGDVAFVK.H                           | 2 | 4.45 | 0.42 |  |
| IPI00798430 | Transferrin variant (Fragment) | R.CLVEKGDVAFVK.H                           | 3 | 4.32 | 0.41 |  |
| IPI00798430 | Transferrin variant (Fragment) | R.CLVEKGDVAFVKHQTVPQNTGGK.N                | 3 | 5.92 | 0.44 |  |
| IPI00798430 | Transferrin variant (Fragment) | R.DDTVCLAK.L                               | 1 | 1.75 | 0.12 |  |
| IPI00798430 | Transferrin variant (Fragment) | R.DQYELLCLDNTR.K                           | 2 | 4.93 | 0.27 |  |
| IPI00798430 | Transferrin variant (Fragment) | R.DQYELLCLDNTR.K                           | 3 | 3.42 | 0.19 |  |
| IPI00798430 | Transferrin variant (Fragment) | R.DQYELLCLDNTRKPVDEYKDCHLAQVPSHTVVAR.S     | 3 | 5.14 | 0.42 |  |
| IPI00798430 | Transferrin variant (Fragment) | R.EGTCPEAPTDECKPVK.W                       | 1 | 2.79 | 0.34 |  |
| IPI00798430 | Transferrin variant (Fragment) | R.EGTCPEAPTDECKPVK.W                       | 2 | 3.97 | 0.30 |  |
| IPI00798430 | Transferrin variant (Fragment) | R.FDEFFSEGCAPGSK.K                         | 1 | 2.92 | 0.39 |  |
| IPI00798430 | Transferrin variant (Fragment) | R.FDEFFSEGCAPGSK.K                         | 2 | 4.88 | 0.47 |  |
| IPI00798430 | Transferrin variant (Fragment) | R.FDEFFSEGCAPGSK.K                         | 3 | 4.04 | 0.19 |  |
| IPI00798430 | Transferrin variant (Fragment) | R.FDEFFSEGCAPGSKK.D                        | 1 | 3.07 | 0.36 |  |

|             |                                         |                                  |   |      |      |       |
|-------------|-----------------------------------------|----------------------------------|---|------|------|-------|
| IPI00798430 | Transferrin variant (Fragment)          | R.FDEFFSEGCAPGSKK.D              | 2 | 4.43 | 0.44 |       |
| IPI00798430 | Transferrin variant (Fragment)          | R.FDEFFSEGCAPGSKK.D              | 3 | 3.58 | 0.34 |       |
| IPI00798430 | Transferrin variant (Fragment)          | R.FDEFFSEGCAPGSKKSSSLCK.L        | 2 | 4.10 | 0.28 |       |
| IPI00798430 | Transferrin variant (Fragment)          | R.KCSTSSLLEACTFR.R               | 1 | 2.79 | 0.50 |       |
| IPI00798430 | Transferrin variant (Fragment)          | R.KCSTSSLLEACTFR.R               | 2 | 4.86 | 0.47 |       |
| IPI00798430 | Transferrin variant (Fragment)          | R.KCSTSSLLEACTFR.R               | 3 | 3.98 | 0.19 |       |
| IPI00798430 | Transferrin variant (Fragment)          | R.KPVDEYKDCHLAQVPSHTVVAR.S       | 3 | 6.08 | 0.36 |       |
| IPI00798430 | Transferrin variant (Fragment)          | R.LKCDEWSVNSVGK.I                | 1 | 3.40 | 0.33 |       |
| IPI00798430 | Transferrin variant (Fragment)          | R.LKCDEWSVNSVGK.I                | 2 | 4.83 | 0.34 |       |
| IPI00798430 | Transferrin variant (Fragment)          | R.LKCDEWSVNSVGK.I                | 3 | 4.71 | 0.27 |       |
| IPI00798430 | Transferrin variant (Fragment)          | R.LKCDEWSVNSVGKIECVSAETTEDCIAK.I | 2 | 4.35 | 0.55 |       |
| IPI00798430 | Transferrin variant (Fragment)          | R.LKCDEWSVNSVGKIECVSAETTEDCIAK.I | 3 | 7.45 | 0.52 |       |
| IPI00798430 | Transferrin variant (Fragment)          | R.NLREGTCPEAPTDECKPVK.W          | 2 | 5.48 | 0.41 |       |
| IPI00798430 | Transferrin variant (Fragment)          | R.NLREGTCPEAPTDECKPVK.W          | 3 | 5.92 | 0.32 |       |
| IPI00798430 | Transferrin variant (Fragment)          | R.NTYEKYLGEYVK.A                 | 1 | 3.75 | 0.33 |       |
| IPI00798430 | Transferrin variant (Fragment)          | R.NTYEKYLGEYVK.A                 | 2 | 4.01 | 0.32 |       |
| IPI00798430 | Transferrin variant (Fragment)          | R.NTYEKYLGEYVK.A                 | 3 | 3.42 | 0.18 |       |
| IPI00798430 | Transferrin variant (Fragment)          | R.QQQLHFGSNVTDCSGNFCLFR.S        | 2 | 3.97 | 0.41 |       |
| IPI00798430 | Transferrin variant (Fragment)          | R.QQQLHFGSNVTDCSGNFCLFR.S        | 3 | 4.10 | 0.30 |       |
| IPI00798430 | Transferrin variant (Fragment)          | R.SAGWNIPIGLLYCDLPEPR.K          | 2 | 5.67 | 0.45 |       |
| IPI00798430 | Transferrin variant (Fragment)          | R.SAGWNIPIGLLYCDLPEPR.K          | 3 | 5.39 | 0.40 |       |
| IPI00798430 | Transferrin variant (Fragment)          | R.SETKDLLFR.D                    | 1 | 2.29 | 0.16 |       |
| IPI00798430 | Transferrin variant (Fragment)          | R.SETKDLLFR.D                    | 2 | 2.87 | 0.15 |       |
| IPI00798430 | Transferrin variant (Fragment)          | R.SETKDLLFRDDTVCLAK.L            | 2 | 4.77 | 0.37 |       |
| IPI00798430 | Transferrin variant (Fragment)          | R.SETKDLLFRDDTVCLAK.L            | 3 | 4.22 | 0.24 |       |
| IPI00798430 | Transferrin variant (Fragment)          | R.SM*GGKEDLIWELLNQAQEHFGK.D      | 2 | 5.35 | 0.43 |       |
| IPI00798430 | Transferrin variant (Fragment)          | R.SM*GGKEDLIWELLNQAQEHFGK.D      | 3 | 5.80 | 0.33 |       |
| IPI00798430 | Transferrin variant (Fragment)          | R.SM*GGKEDLIWELLNQAQEHFGKDK.S    | 2 | 4.12 | 0.39 |       |
| IPI00798430 | Transferrin variant (Fragment)          | R.SM*GGKEDLIWELLNQAQEHFGKDK.S    | 3 | 5.39 | 0.32 |       |
| IPI00798430 | Transferrin variant (Fragment)          | R.SMGGKEDLIWELLNQAQEHFGKDK.S     | 2 | 4.36 | 0.25 |       |
| IPI00798430 | Transferrin variant (Fragment)          | R.SMGGKEDLIWELLNQAQEHFGKDK.S     | 3 | 6.16 | 0.40 |       |
| IPI00798430 | Transferrin variant (Fragment)          | R.TAGWNIPM*GLLYNK.I              | 1 | 3.32 | 0.23 |       |
| IPI00798430 | Transferrin variant (Fragment)          | R.TAGWNIPM*GLLYNK.I              | 2 | 4.54 | 0.37 |       |
| IPI00798430 | Transferrin variant (Fragment)          | R.TAGWNIPM*GLLYNK.I              | 3 | 3.93 | 0.34 |       |
| IPI00798430 | Transferrin variant (Fragment)          | R.TAGWNIPMGLLYNK.I               | 2 | 4.30 | 0.31 |       |
| IPI00798430 | Transferrin variant (Fragment)          | R.TAGWNIPMGLLYNK.I               | 3 | 3.59 | 0.20 |       |
| IPI00798430 | Transferrin variant (Fragment)          | R.WCAVSEHEATK.C                  | 1 | 2.83 | 0.36 |       |
| IPI00798430 | Transferrin variant (Fragment)          | R.WCAVSEHEATK.C                  | 2 | 4.09 | 0.30 |       |
| IPI00798430 | Transferrin variant (Fragment)          | R.WCAVSEHEATK.C                  | 3 | 2.96 | 0.18 |       |
| IPI00798430 | Transferrin variant (Fragment)          | R.WCAVSEHEATKQSF.R.D             | 3 | 3.47 | 0.27 |       |
| IPI00807418 | Isoform 9 of Lymphoid-specific helicase | K.KESLKVKKGKNSIDASEEKPGNFVCG.-   | 3 | 3.23 | 0.17 |       |
| IPI00807609 | Aberrant LSLCL                          | R.DAVQALQEAQGR.A                 | 2 | 2.82 | 0.26 | -3.81 |

|             |                                                          |                                            |   |      |      |       |
|-------------|----------------------------------------------------------|--------------------------------------------|---|------|------|-------|
| IPI00815786 | Hexokinase 1 (Fragment)                                  | R.GAVRCPPQLPNGVWR.G                        | 3 | 2.68 | 0.17 |       |
| IPI00815893 | Isoform 1 of Chromodomain-helicase-DNA-binding protein 2 | R.SFHTDKLGEYK.Q                            | 1 | 2.46 | 0.18 |       |
| IPI00815926 | IGHG1 protein                                            | C.DKTHTCPAPPELLGGPSVFLFPPKPK.D             | 3 | 6.55 | 0.38 |       |
| IPI00815926 | IGHG1 protein                                            | K.ALPAPIEK.T                               | 1 | 1.81 | 0.11 |       |
| IPI00815926 | IGHG1 protein                                            | K.CKVSINKALPAPIEK.T                        | 2 | 2.28 | 0.15 |       |
| IPI00815926 | IGHG1 protein                                            | K.DTLM*ISR.T                               | 2 | 2.48 | 0.09 | -3.74 |
| IPI00815926 | IGHG1 protein                                            | K.DTLMISR.T                                | 1 | 2.38 | 0.13 |       |
| IPI00815926 | IGHG1 protein                                            | K.DTLMISR.T                                | 2 | 2.45 | 0.16 |       |
| IPI00815926 | IGHG1 protein                                            | K.FNWYVDGVEVHNAK.T                         | 1 | 3.93 | 0.41 |       |
| IPI00815926 | IGHG1 protein                                            | K.FNWYVDGVEVHNAK.T                         | 2 | 5.51 | 0.51 |       |
| IPI00815926 | IGHG1 protein                                            | K.FNWYVDGVEVHNAK.T                         | 3 | 3.99 | 0.38 |       |
| IPI00815926 | IGHG1 protein                                            | K.GFYPSDIAVEWESNGQPENNYK.T                 | 2 | 4.88 | 0.31 |       |
| IPI00815926 | IGHG1 protein                                            | K.GFYPSDIAVEWESNGQPENNYK.T                 | 3 | 4.56 | 0.26 |       |
| IPI00815926 | IGHG1 protein                                            | K.GFYPSDIAVEWESNGQPENNYKTPPVLDSDGSFFLYSK.L | 3 | 4.64 | 0.25 |       |
| IPI00815926 | IGHG1 protein                                            | K.GLEWVANIK.Z                              | 1 | 2.05 | 0.11 |       |
| IPI00815926 | IGHG1 protein                                            | K.GLEWVANIK.Z                              | 2 | 3.69 | 0.25 |       |
| IPI00815926 | IGHG1 protein                                            | K.GPSVFPLAPSSK.S                           | 1 | 3.15 | 0.35 |       |
| IPI00815926 | IGHG1 protein                                            | K.GPSVFPLAPSSK.S                           | 2 | 3.30 | 0.36 |       |
| IPI00815926 | IGHG1 protein                                            | K.GPSVFPLAPSSKSTSGGTAALGCLVK.D             | 2 | 4.62 | 0.48 |       |
| IPI00815926 | IGHG1 protein                                            | K.GPSVFPLAPSSKSTSGGTAALGCLVK.D             | 3 | 4.18 | 0.48 |       |
| IPI00815926 | IGHG1 protein                                            | K.GQPREPQVYTLPPSR.E                        | 2 | 2.89 | 0.13 |       |
| IPI00815926 | IGHG1 protein                                            | K.GQPREPQVYTLPPSR.E                        | 3 | 2.92 | 0.17 |       |
| IPI00815926 | IGHG1 protein                                            | K.GQPREPQVYTLPPSRDELTK.N                   | 3 | 4.51 | 0.32 |       |
| IPI00815926 | IGHG1 protein                                            | K.NQVSLTCLVK.G                             | 1 | 2.26 | 0.22 |       |
| IPI00815926 | IGHG1 protein                                            | K.NQVSLTCLVK.G                             | 2 | 2.44 | 0.28 | -2.15 |
| IPI00815926 | IGHG1 protein                                            | K.NSLYLQM*NSLR.A                           | 2 | 3.76 | 0.14 |       |
| IPI00815926 | IGHG1 protein                                            | K.NSLYLQMNSLR.A                            | 1 | 3.55 | 0.11 |       |
| IPI00815926 | IGHG1 protein                                            | K.NSLYLQMNSLR.A                            | 2 | 4.01 | 0.17 |       |
| IPI00815926 | IGHG1 protein                                            | K.QDGSEKYYVDSVK.G                          | 2 | 2.42 | 0.17 |       |
| IPI00815926 | IGHG1 protein                                            | K.SCDKTHTCPAPPELLGGPSVFLFPPKPK.D           | 3 | 6.71 | 0.47 |       |
| IPI00815926 | IGHG1 protein                                            | K.THTCPAPPELLGGPSVFLFPPKPK.D               | 2 | 3.81 | 0.39 |       |
| IPI00815926 | IGHG1 protein                                            | K.THTCPAPPELLGGPSVFLFPPKPK.D               | 3 | 6.29 | 0.52 |       |
| IPI00815926 | IGHG1 protein                                            | K.TKPREEQYNSTYR.V                          | 2 | 2.99 | 0.10 |       |
| IPI00815926 | IGHG1 protein                                            | K.TTPPVLDSDGSFFLYSK.L                      | 1 | 3.22 | 0.41 |       |
| IPI00815926 | IGHG1 protein                                            | K.TTPPVLDSDGSFFLYSK.L                      | 2 | 3.42 | 0.37 |       |
| IPI00815926 | IGHG1 protein                                            | K.TTPPVLDSDGSFFLYSK.L                      | 3 | 4.11 | 0.39 |       |
| IPI00815926 | IGHG1 protein                                            | K.VSNKALPAPIEK.T                           | 2 | 3.33 | 0.18 |       |
| IPI00815926 | IGHG1 protein                                            | K.WYVDGVEVHNAK.T                           | 1 | 2.91 | 0.35 |       |
| IPI00815926 | IGHG1 protein                                            | K.WYVDGVEVHNAK.T                           | 2 | 3.90 | 0.46 |       |
| IPI00815926 | IGHG1 protein                                            | K.WYVDGVEVHNAK.T                           | 3 | 2.99 | 0.21 |       |
| IPI00815926 | IGHG1 protein                                            | K.YYVDSVK.G                                | 1 | 2.28 | 0.11 |       |

|             |                                                           |                                        |   |      |      |       |
|-------------|-----------------------------------------------------------|----------------------------------------|---|------|------|-------|
| IPI00815926 | IGHG1 protein                                             | N.WFDPWQGGLTVTVSSASTK.G                | 2 | 5.17 | 0.20 |       |
| IPI00815926 | IGHG1 protein                                             | R.CPAPELLGGPSVFLFPPKPK.D               | 2 | 4.00 | 0.37 |       |
| IPI00815926 | IGHG1 protein                                             | R.CPAPELLGGPSVFLFPPKPK.D               | 3 | 6.31 | 0.49 |       |
| IPI00815926 | IGHG1 protein                                             | R.CPAPELLGGPSVFLFPPKPKDTLM*ISR.T       | 3 | 3.77 | 0.23 |       |
| IPI00815926 | IGHG1 protein                                             | R.DNAKNSLYLQM*NSLR.A                   | 2 | 4.82 | 0.44 |       |
| IPI00815926 | IGHG1 protein                                             | R.DNAKNSLYLQM*NSLR.A                   | 3 | 4.39 | 0.37 |       |
| IPI00815926 | IGHG1 protein                                             | R.EPQVYTLPPSRDELTK.N                   | 2 | 3.97 | 0.21 |       |
| IPI00815926 | IGHG1 protein                                             | R.EPQVYTLPPSRDELTKNQVSLTCLVK.G         | 3 | 4.03 | 0.23 |       |
| IPI00815926 | IGHG1 protein                                             | R.STSGGTAALGCLVK.D                     | 1 | 2.45 | 0.34 |       |
| IPI00815926 | IGHG1 protein                                             | R.STSGGTAALGCLVK.D                     | 2 | 4.37 | 0.45 |       |
| IPI00815926 | IGHG1 protein                                             | R.TPEVTCVVVDVSHED.P                    | 2 | 5.50 | 0.52 |       |
| IPI00815926 | IGHG1 protein                                             | R.VVSVLTVLHQDWLNGK.E                   | 1 | 4.22 | 0.41 |       |
| IPI00815926 | IGHG1 protein                                             | R.VVSVLTVLHQDWLNGK.E                   | 2 | 5.39 | 0.46 |       |
| IPI00815926 | IGHG1 protein                                             | R.VVSVLTVLHQDWLNGK.E                   | 3 | 3.42 | 0.38 |       |
| IPI00815926 | IGHG1 protein                                             | R.VVSVLTVLHQDWLNGKEYK.C                | 2 | 5.56 | 0.40 |       |
| IPI00815926 | IGHG1 protein                                             | R.VVSVLTVLHQDWLNGKEYK.C                | 3 | 4.97 | 0.40 |       |
| IPI00815938 | IGLV3-21 protein                                          | K.ADGSPVKAGVETTKPSK.Q                  | 2 | 3.18 | 0.20 |       |
| IPI00815938 | IGLV3-21 protein                                          | K.ADGSPVKAGVETTKPSK.Q                  | 3 | 3.41 | 0.23 |       |
| IPI00815938 | IGLV3-21 protein                                          | K.AGVETTKPSK.Q                         | 2 | 2.24 | 0.11 | -2.24 |
| IPI00815938 | IGLV3-21 protein                                          | K.ANPTVTLFPPSSEELQANK.A                | 2 | 4.70 | 0.37 |       |
| IPI00815938 | IGLV3-21 protein                                          | K.ATLVCLISDFYPGAVTVAWK.A               | 2 | 5.07 | 0.50 |       |
| IPI00815938 | IGLV3-21 protein                                          | K.ATLVCLISDFYPGAVTVAWK.A               | 3 | 3.53 | 0.31 | -3.63 |
| IPI00815938 | IGLV3-21 protein                                          | K.QSNNKYAASSYLSLTPEQWK.S               | 2 | 5.38 | 0.37 |       |
| IPI00815938 | IGLV3-21 protein                                          | K.QSNNKYAASSYLSLTPEQWK.S               | 3 | 4.26 | 0.33 |       |
| IPI00815938 | IGLV3-21 protein                                          | K.YAASSYLSLTPEQWK.S                    | 1 | 3.49 | 0.43 |       |
| IPI00815938 | IGLV3-21 protein                                          | K.YAASSYLSLTPEQWK.S                    | 2 | 5.52 | 0.47 |       |
| IPI00815938 | IGLV3-21 protein                                          | K.YAASSYLSLTPEQWK.S                    | 3 | 3.44 | 0.22 |       |
| IPI00815938 | IGLV3-21 protein                                          | R.ITCGGNNIGSK.S                        | 2 | 2.81 | 0.18 |       |
| IPI00815938 | IGLV3-21 protein                                          | R.LSGNSGNTATLTISR.V                    | 2 | 4.40 | 0.46 |       |
| IPI00815938 | IGLV3-21 protein                                          | R.SYSCQVTHEGSTVEK.T                    | 1 | 3.84 | 0.43 |       |
| IPI00815938 | IGLV3-21 protein                                          | R.SYSCQVTHEGSTVEK.T                    | 2 | 3.17 | 0.41 | -4.10 |
| IPI00815938 | IGLV3-21 protein                                          | R.SYSCQVTHEGSTVEKTVAPTECS.-            | 2 | 5.35 | 0.45 |       |
| IPI00815938 | IGLV3-21 protein                                          | R.SYSCQVTHEGSTVEKTVAPTECS.-            | 3 | 2.78 | 0.26 |       |
| IPI00816155 | Isoform 2 of Complement C1q-like protein 3 precursor      | R.ASAIQDADQNYDYASNSVVLHLEPGDEVYIK.L    | 3 | 5.57 | 0.51 | -3.06 |
| IPI00816274 | Chemokine-like factor superfamily 1 transcript variant 26 | K.ILRVSGELDLTNSIITAVFLSVVAILAM*QEKKR.R | 3 | 1.23 | 0.26 | -2.54 |
| IPI00816555 | IGLV2-14 protein                                          | K.AAPSVTLFPPSSEELQANK.A                | 1 | 4.04 | 0.50 |       |
| IPI00816555 | IGLV2-14 protein                                          | K.AAPSVTLFPPSSEELQANK.A                | 2 | 3.15 | 0.34 | -1.50 |
| IPI00816555 | IGLV2-14 protein                                          | K.AAPSVTLFPPSSEELQANK.A                | 3 | 3.32 | 0.13 |       |
| IPI00816555 | IGLV2-14 protein                                          | K.ADSSPVKAGVETTTPSK.Q                  | 1 | 3.85 | 0.37 |       |
| IPI00816555 | IGLV2-14 protein                                          | K.ADSSPVKAGVETTTPSK.Q                  | 2 | 3.50 | 0.38 |       |

|             |                                             |                                        |   |      |      |       |
|-------------|---------------------------------------------|----------------------------------------|---|------|------|-------|
| IPI00816555 | IGLV2-14 protein                            | K.ADSSPVKAGVETTTPSK.Q                  | 3 | 3.46 | 0.35 |       |
| IPI00816555 | IGLV2-14 protein                            | K.ADSSPVKAGVETTTPSKQSNK.Y              | 2 | 5.35 | 0.42 |       |
| IPI00816555 | IGLV2-14 protein                            | K.ADSSPVKAGVETTTPSKQSNK.Y              | 3 | 4.61 | 0.23 |       |
| IPI00816555 | IGLV2-14 protein                            | K.AGVETTTPSK.Q                         | 2 | 2.62 | 0.09 | -3.23 |
| IPI00816555 | IGLV2-14 protein                            | K.AGVETTTPSKQSNK.Y                     | 2 | 4.14 | 0.32 |       |
| IPI00816555 | IGLV2-14 protein                            | K.AGVETTTPSKQSNKYAASSYLSLTPEQWK.S      | 3 | 5.47 | 0.40 |       |
| IPI00816555 | IGLV2-14 protein                            | K.QSNNKYAASSYLSLTPEQWK.S               | 2 | 5.38 | 0.37 |       |
| IPI00816555 | IGLV2-14 protein                            | K.QSNNKYAASSYLSLTPEQWK.S               | 3 | 4.26 | 0.33 |       |
| IPI00816555 | IGLV2-14 protein                            | K.YAASSYLSLTPEQWK.S                    | 1 | 3.49 | 0.43 |       |
| IPI00816555 | IGLV2-14 protein                            | K.YAASSYLSLTPEQWK.S                    | 2 | 5.52 | 0.47 |       |
| IPI00816555 | IGLV2-14 protein                            | K.YAASSYLSLTPEQWK.S                    | 3 | 3.44 | 0.22 |       |
| IPI00816555 | IGLV2-14 protein                            | R.SYSCQVTHEGSTVEK.T                    | 1 | 3.84 | 0.43 |       |
| IPI00816555 | IGLV2-14 protein                            | R.SYSCQVTHEGSTVEK.T                    | 2 | 3.17 | 0.41 | -4.10 |
| IPI00816555 | IGLV2-14 protein                            | R.SYSCQVTHEGSTVEKTVAPTECS.-            | 2 | 5.35 | 0.45 |       |
| IPI00816555 | IGLV2-14 protein                            | R.SYSCQVTHEGSTVEKTVAPTECS.-            | 3 | 2.78 | 0.26 |       |
| IPI00816626 | PLXNB2 protein                              | K.AGYLSTNTQQFVAAFEDGPYVFFVFNQQDKHPAR.N | 4 | 3.78 | 0.35 | -3.75 |
| IPI00816626 | PLXNB2 protein                              | K.ELNHLAVDEASGVVYLGAVNALYQLDAK.L       | 3 | 4.66 | 0.36 | -4.06 |
| IPI00816626 | PLXNB2 protein                              | K.GNGPHDNGIIVSTR.L                     | 2 | 3.36 | 0.21 | -3.30 |
| IPI00816626 | PLXNB2 protein                              | K.LQLEQQVATGPALDNK.K                   | 2 | 5.73 | 0.48 | -3.57 |
| IPI00816626 | PLXNB2 protein                              | K.LQLEQQVATGPALDNK.K                   | 2 | 5.02 | 0.47 | -2.76 |
| IPI00816626 | PLXNB2 protein                              | K.LQLEQQVATGPALDNK.K                   | 3 | 3.97 | 0.43 | -1.88 |
| IPI00816626 | PLXNB2 protein                              | K.SFVASNDEGVATVGLVSSTGPGGDR.V          | 2 | 5.66 | 0.59 | -7.90 |
| IPI00816626 | PLXNB2 protein                              | K.SFVASNDEGVATVGLVSSTGPGGDR.V          | 3 | 2.68 | 0.18 | -2.91 |
| IPI00816626 | PLXNB2 protein                              | K.VYLTPDGTSEYDSILVEINKR.V              | 2 | 4.50 | 0.55 | -3.97 |
| IPI00816626 | PLXNB2 protein                              | R.DLVLSGDLGSLYAM*TQDKVFR.L             | 3 | 2.75 | 0.30 | -2.23 |
| IPI00816626 | PLXNB2 protein                              | R.EAFEAYTDHATYK.A                      | 2 | 3.81 | 0.48 | -1.76 |
| IPI00816626 | PLXNB2 protein                              | R.LVECGSLFK.G                          | 1 | 1.92 | 0.23 | -1.85 |
| IPI00816626 | PLXNB2 protein                              | R.LVECGSLFK.G                          | 2 | 2.73 | 0.20 | -2.02 |
| IPI00816626 | PLXNB2 protein                              | R.SEKELNHLAVDEASGVVYLGAVNALYQLDAK.L    | 4 | 3.47 | 0.27 | -2.70 |
| IPI00816626 | PLXNB2 protein                              | R.VLFGKGNPHDNGIIVSTR.L                 | 3 | 2.61 | 0.29 | -3.11 |
| IPI00816626 | PLXNB2 protein                              | R.VLFGKGNPHDNGIIVSTR.L                 | 4 | 2.81 | 0.20 | -2.03 |
| IPI00816626 | PLXNB2 protein                              | R.VLYAVFSR.D                           | 1 | 1.87 | 0.17 | -2.41 |
| IPI00816626 | PLXNB2 protein                              | R.VLYAVFSR.D                           | 2 | 2.80 | 0.27 | -1.97 |
| IPI00816737 | Rheumatoid factor D5 heavy chain (Fragment) | R.IEDTAVYYCAR.G                        | 2 | 4.10 | 0.18 |       |
| IPI00816741 | Complement component 5 variant (Fragment)   | K.AFTECCVVASQLR.A                      | 2 | 4.02 | 0.41 | -2.94 |
| IPI00816741 | Complement component 5 variant (Fragment)   | K.ALLVGEHLNIIIVTPK.S                   | 3 | 3.28 | 0.36 | -1.73 |
| IPI00816741 | Complement component 5 variant (Fragment)   | K.CCYDGACVNNDETCEQR.A                  | 2 | 6.02 | 0.65 | -4.87 |
| IPI00816741 | Complement component 5 variant (Fragment)   | K.DSLDQLVGGVPVTLNAQTIDVNETSDLDPSK.S    | 3 | 2.67 | 0.14 | -4.63 |
| IPI00816741 | Complement component 5 variant (Fragment)   | K.EFPYRIPLDLVPKTEIKR.I                 | 4 | 2.42 | 0.22 | -2.30 |
| IPI00816741 | Complement component 5 variant (Fragment)   | K.FQNSAILTIQPK.Q                       | 2 | 4.71 | 0.37 | -1.77 |
| IPI00816741 | Complement component 5 variant (Fragment)   | K.FSDASYQSINIPVTQNM*VPSSR.L            | 2 | 4.07 | 0.53 | -4.11 |
| IPI00816741 | Complement component 5 variant (Fragment)   | K.FSDASYQSINIPVTQNM*VPSSR.L            | 3 | 3.91 | 0.46 | -3.20 |

|             |                                                    |                                              |   |      |      |       |
|-------------|----------------------------------------------------|----------------------------------------------|---|------|------|-------|
| IPI00816741 | Complement component 5 variant (Fragment)          | K.GTVYNYR.T                                  | 2 | 2.31 | 0.29 | -1.46 |
| IPI00816741 | Complement component 5 variant (Fragment)          | K.ITHYNYLILSK.G                              | 2 | 3.91 | 0.34 | -2.90 |
| IPI00816741 | Complement component 5 variant (Fragment)          | K.KIEEIAAK.Y                                 | 1 | 2.09 | 0.08 | -3.90 |
| IPI00816741 | Complement component 5 variant (Fragment)          | K.KIEEIAAK.Y                                 | 2 | 2.74 | 0.07 | -3.30 |
| IPI00816741 | Complement component 5 variant (Fragment)          | K.LNLVATPLFLKPGIPYPIK.V                      | 3 | 4.09 | 0.45 | -2.97 |
| IPI00816741 | Complement component 5 variant (Fragment)          | K.LNLVATPLFLKPGIPYPIKVQVK.D                  | 3 | 3.68 | 0.44 | -4.26 |
| IPI00816741 | Complement component 5 variant (Fragment)          | K.LNLVATPLFLKPGIPYPIKVQVK.D                  | 4 | 3.00 | 0.40 | -4.69 |
| IPI00816741 | Complement component 5 variant (Fragment)          | K.M*SAVEGICTSESPVIDHQGTK.S                   | 3 | 3.08 | 0.32 | -2.95 |
| IPI00816741 | Complement component 5 variant (Fragment)          | K.NFKNFEITIK.A                               | 3 | 2.46 | 0.07 | -1.51 |
| IPI00816741 | Complement component 5 variant (Fragment)          | K.QLPGGQNPVSYVYLEVVS.K.H                     | 2 | 4.11 | 0.53 | -3.94 |
| IPI00816741 | Complement component 5 variant (Fragment)          | K.QLPGGQNPVSYVYLEVVS.K.H                     | 3 | 3.46 | 0.38 | -3.78 |
| IPI00816741 | Complement component 5 variant (Fragment)          | K.RM*PITYDNGFLFIHTDKPVYTPDQSVK.V             | 4 | 3.94 | 0.27 | -4.46 |
| IPI00816741 | Complement component 5 variant (Fragment)          | K.SPYIDKITHYNYLILSK.G                        | 2 | 5.16 | 0.41 | -2.65 |
| IPI00816741 | Complement component 5 variant (Fragment)          | K.SPYIDKITHYNYLILSK.G                        | 3 | 4.00 | 0.34 | -3.30 |
| IPI00816741 | Complement component 5 variant (Fragment)          | K.SPYIDKITHYNYLILSK.G                        | 4 | 3.64 | 0.31 | 0.72  |
| IPI00816741 | Complement component 5 variant (Fragment)          | K.TDAPDLPEENQAR.E                            | 2 | 3.94 | 0.37 | -3.97 |
| IPI00816741 | Complement component 5 variant (Fragment)          | K.TLLPVSKPEIR.S                              | 2 | 2.58 | 0.21 | -2.16 |
| IPI00816741 | Complement component 5 variant (Fragment)          | K.VFKDVFLEM*NIPYSVVR.G                       | 2 | 5.44 | 0.43 | -2.79 |
| IPI00816741 | Complement component 5 variant (Fragment)          | K.VFKDVFLEM*NIPYSVVR.G                       | 3 | 5.03 | 0.34 | -1.92 |
| IPI00816741 | Complement component 5 variant (Fragment)          | K.VFKDVFLEM*NIPYSVVRGEQIQLK.G                | 3 | 4.21 | 0.42 | -3.36 |
| IPI00816741 | Complement component 5 variant (Fragment)          | K.YVLSPYK.L                                  | 1 | 1.99 | 0.18 | -1.91 |
| IPI00816741 | Complement component 5 variant (Fragment)          | R.EKFSASYQSINIPVTQNM*VPSSR.L                 | 3 | 5.27 | 0.48 | -2.26 |
| IPI00816741 | Complement component 5 variant (Fragment)          | R.ESYSGVTLDPR.G                              | 2 | 2.42 | 0.25 | -2.33 |
| IPI00816741 | Complement component 5 variant (Fragment)          | R.ETVLTFFIDPEGSEVDM*VEEIDHIGIISFPDFK.I       | 3 | 4.05 | 0.38 | -5.95 |
| IPI00816741 | Complement component 5 variant (Fragment)          | R.ETVLTFFIDPEGSEVDM*VEEIDHIGIISFPDFKIPSNPR.Y | 4 | 3.42 | 0.29 | -4.20 |
| IPI00816741 | Complement component 5 variant (Fragment)          | R.IPLDLVPK.T                                 | 2 | 2.40 | 0.23 | -2.93 |
| IPI00816741 | Complement component 5 variant (Fragment)          | R.M*PITYDNGFLFIHTDKPVYTPDQSVK.V              | 3 | 5.38 | 0.56 | -1.62 |
| IPI00816741 | Complement component 5 variant (Fragment)          | R.VVPEGVKR.E                                 | 2 | 1.57 | 0.07 | -1.94 |
| IPI00816741 | Complement component 5 variant (Fragment)          | R.VYSLNDDLKPAKR.E                            | 2 | 4.51 | 0.41 | -3.78 |
| IPI00816775 | F5-20 (Fragment)                                   | K.GTAVTVSSASTK.-                             | 2 | 3.28 | 0.10 |       |
| IPI00816775 | F5-20 (Fragment)                                   | R.ADDTAVYYCAR.A                              | 2 | 4.39 | 0.38 |       |
| IPI00816794 | REV25-2 (Fragment)                                 | R.LLIYGASIR.A                                | 1 | 1.96 | 0.10 |       |
| IPI00816794 | REV25-2 (Fragment)                                 | R.LLIYGASIR.A                                | 2 | 2.77 | 0.12 |       |
| IPI00816799 | Rheumatoid factor D5 light chain (Fragment)        | G.EIVLTQSPATLSLSPGER.A                       | 2 | 5.23 | 0.35 |       |
| IPI00816799 | Rheumatoid factor D5 light chain (Fragment)        | R.ASQSVATYLAWYQHKGQAPR.L                     | 3 | 3.29 | 0.18 |       |
| IPI00816799 | Rheumatoid factor D5 light chain (Fragment)        | R.FSGSGSGTDFLTITSSLEPADFAVYYCQHR.N           | 3 | 4.30 | 0.23 |       |
| IPI00816799 | Rheumatoid factor D5 light chain (Fragment)        | R.LLIYDASNR.A                                | 1 | 2.24 | 0.07 |       |
| IPI00816799 | Rheumatoid factor D5 light chain (Fragment)        | R.LLIYDASNR.A                                | 2 | 3.50 | 0.32 |       |
| IPI00816799 | Rheumatoid factor D5 light chain (Fragment)        | R.TVAAPSVF.-                                 | 1 | 1.75 | 0.12 |       |
| IPI00827482 | Uncharacterized protein ENSP00000348964 (Fragment) | K.NTLYLQM*NSLK.T                             | 2 | 2.43 | 0.12 |       |

|             |                                                                                             |                             |   |      |      |  |
|-------------|---------------------------------------------------------------------------------------------|-----------------------------|---|------|------|--|
| IPI00827482 | Uncharacterized protein ENSP00000348964 (Fragment)                                          | K.NTLYLQMNSLK.T             | 2 | 3.59 | 0.08 |  |
| IPI00827482 | Uncharacterized protein ENSP00000348964 (Fragment)                                          | R.DDSKNTLYLQM*NSLK.T        | 2 | 4.53 | 0.27 |  |
| IPI00827482 | Uncharacterized protein ENSP00000348964 (Fragment)                                          | R.DDSKNTLYLQM*NSLK.T        | 3 | 3.61 | 0.23 |  |
| IPI00827482 | Uncharacterized protein ENSP00000348964 (Fragment)                                          | R.FTISRDDSK.N               | 2 | 2.52 | 0.15 |  |
| IPI00827485 | BRE (Fragment)                                                                              | K.ASTLETGVPSR.F             | 2 | 3.00 | 0.37 |  |
| IPI00827510 | HRV Fab 026-VL (Fragment)                                                                   | R.ASQSVGSYLAWYQQKPGQAPR.L   | 3 | 3.19 | 0.18 |  |
| IPI00827510 | HRV Fab 026-VL (Fragment)                                                                   | R.ATGIPDRFSGSGSGTDFTLTISR.L | 2 | 4.84 | 0.38 |  |
| IPI00827510 | HRV Fab 026-VL (Fragment)                                                                   | R.ATGIPDRFSGSGSGTDFTLTISR.L | 3 | 3.97 | 0.23 |  |
| IPI00827510 | HRV Fab 026-VL (Fragment)                                                                   | R.FSGSGSGTDFTLTISR.L        | 1 | 2.55 | 0.22 |  |
| IPI00827510 | HRV Fab 026-VL (Fragment)                                                                   | R.FSGSGSGTDFTLTISR.L        | 2 | 4.49 | 0.53 |  |
| IPI00827510 | HRV Fab 026-VL (Fragment)                                                                   | R.LLIYGASSR.A               | 2 | 3.35 | 0.21 |  |
| IPI00827522 | Anti-streptococcal/anti-myosin immunoglobulin lambda light chain variable region (Fragment) | K.SGTSASLAISGLR.S           | 1 | 2.82 | 0.39 |  |
| IPI00827522 | Anti-streptococcal/anti-myosin immunoglobulin lambda light chain variable region (Fragment) | K.SGTSASLAISGLR.S           | 2 | 3.92 | 0.23 |  |
| IPI00827560 | HRV Fab N27-VL (Fragment)                                                                   | R.ASQSVSSSYLAWYQQKPGQAPR.L  | 2 | 5.52 | 0.40 |  |
| IPI00827560 | HRV Fab N27-VL (Fragment)                                                                   | R.ASQSVSSSYLAWYQQKPGQAPR.L  | 3 | 3.59 | 0.29 |  |
| IPI00827560 | HRV Fab N27-VL (Fragment)                                                                   | R.ATGIPDRFSGSGSGTDFTLTISR.L | 2 | 4.84 | 0.38 |  |
| IPI00827560 | HRV Fab N27-VL (Fragment)                                                                   | R.ATGIPDRFSGSGSGTDFTLTISR.L | 3 | 3.97 | 0.23 |  |
| IPI00827560 | HRV Fab N27-VL (Fragment)                                                                   | R.FSGSGSGTDFTLTISR.L        | 1 | 2.55 | 0.22 |  |
| IPI00827560 | HRV Fab N27-VL (Fragment)                                                                   | R.FSGSGSGTDFTLTISR.L        | 2 | 4.49 | 0.53 |  |
| IPI00827560 | HRV Fab N27-VL (Fragment)                                                                   | R.LLIYGASSR.A               | 2 | 3.35 | 0.21 |  |
| IPI00827580 | Immunoglobulin kappa, VJ region (Fragment)                                                  | R.ASQSVGSNIAWYQQKPGQAPR.L   | 3 | 2.89 | 0.20 |  |
| IPI00827581 | Variable immunoglobulin anti-estradiol heavy chain (Fragment)                               | -.QVQLQESGGGLVQPGGSLR.L     | 2 | 3.17 | 0.16 |  |
| IPI00827581 | Variable immunoglobulin anti-estradiol heavy chain (Fragment)                               | -.QVQLQESGGGLVQPGGSLR.L     | 3 | 4.59 | 0.15 |  |
| IPI00827581 | Variable immunoglobulin anti-estradiol heavy chain (Fragment)                               | K.NTLYLQMNSLR.A             | 1 | 3.28 | 0.09 |  |
| IPI00827581 | Variable immunoglobulin anti-estradiol heavy chain (Fragment)                               | K.NTLYLQMNSLR.A             | 2 | 4.45 | 0.07 |  |
| IPI00827581 | Variable immunoglobulin anti-estradiol heavy chain (Fragment)                               | R.DNSKNTLYLQM*NSLR.A        | 2 | 3.02 | 0.07 |  |
| IPI00827581 | Variable immunoglobulin anti-estradiol heavy chain (Fragment)                               | R.DNSKNTLYLQM*NSLR.A        | 3 | 3.90 | 0.23 |  |
| IPI00827584 | similar to kinesin family member 27                                                         | K.LQLNTGM*KVSRIAR.S         | 2 | 1.92 | 0.17 |  |
| IPI00827637 | K light chain variable region (Fragment)                                                    | R.ATGIPDRFSGSGSGTDFTLTISR.L | 2 | 4.84 | 0.38 |  |
| IPI00827637 | K light chain variable region (Fragment)                                                    | R.ATGIPDRFSGSGSGTDFTLTISR.L | 3 | 3.97 | 0.23 |  |

|             |                                                    |                              |   |      |      |       |
|-------------|----------------------------------------------------|------------------------------|---|------|------|-------|
| IPI00827637 | K light chain variable region (Fragment)           | R.FSGSGSGTDFLTISR.L          | 1 | 2.55 | 0.22 |       |
| IPI00827637 | K light chain variable region (Fragment)           | R.FSGSGSGTDFLTISR.L          | 2 | 4.49 | 0.53 |       |
| IPI00827637 | K light chain variable region (Fragment)           | R.LLIYGASSR.A                | 2 | 3.35 | 0.21 |       |
| IPI00827650 | Isoform 3 of CD44 antigen precursor                | K.ALSIGFETCR.Y               | 1 | 1.85 | 0.09 | -3.16 |
| IPI00827650 | Isoform 3 of CD44 antigen precursor                | K.ALSIGFETCR.Y               | 2 | 3.58 | 0.36 | -4.03 |
| IPI00827650 | Isoform 3 of CD44 antigen precursor                | R.FAGVFHVEK.N                | 2 | 2.52 | 0.10 | -2.49 |
| IPI00827650 | Isoform 3 of CD44 antigen precursor                | R.SSTSGALM*STSATATETATK.R    | 2 | 2.35 | 0.08 | 0.75  |
| IPI00827650 | Isoform 3 of CD44 antigen precursor                | R.TEADLCK.A                  | 2 | 2.11 | 0.20 | -3.54 |
| IPI00827650 | Isoform 3 of CD44 antigen precursor                | R.TNPEDIYPSNPTDDDVSSGSSSER.S | 2 | 4.52 | 0.59 | -2.57 |
| IPI00827650 | Isoform 3 of CD44 antigen precursor                | R.TNPEDIYPSNPTDDDVSSGSSSER.S | 3 | 4.06 | 0.40 | -0.95 |
| IPI00827650 | Isoform 3 of CD44 antigen precursor                | R.YGFIEGHVVIPR.I             | 1 | 2.34 | 0.34 | -3.25 |
| IPI00827650 | Isoform 3 of CD44 antigen precursor                | R.YGFIEGHVVIPR.I             | 2 | 3.90 | 0.43 | -3.84 |
| IPI00827650 | Isoform 3 of CD44 antigen precursor                | R.YGFIEGHVVIPR.I             | 3 | 3.67 | 0.46 | -3.94 |
| IPI00827650 | Isoform 3 of CD44 antigen precursor                | R.YVQKGEYR.T                 | 1 | 2.12 | 0.07 | -4.04 |
| IPI00827650 | Isoform 3 of CD44 antigen precursor                | R.YVQKGEYR.T                 | 2 | 2.93 | 0.22 | -2.84 |
| IPI00827650 | Isoform 3 of CD44 antigen precursor                | Y.GFIEGHVVIPR.I              | 2 | 3.56 | 0.44 | -2.58 |
| IPI00827724 | Rheumatoid factor Vh I region precursor (Fragment) | K.AEDTAVYFCAR.D              | 2 | 4.61 | 0.41 |       |
| IPI00827745 | Isoform 1 of RNA-binding protein 24                | K.YFEVFGEIEEAVITDR.Q         | 2 | 3.17 | 0.16 | 2.18  |
| IPI00827788 | VH-3 family (VH26)D/J protein (Fragment)           | K.NTLYLQM*KALR.A             | 2 | 3.06 | 0.07 |       |
| IPI00827829 | HRV Fab N8-VL (Fragment)                           | R.ASGVPDRFSGSGSGTDFTLK.I     | 2 | 4.21 | 0.34 |       |
| IPI00827829 | HRV Fab N8-VL (Fragment)                           | R.ASGVPDRFSGSGSGTDFTLK.I     | 3 | 4.21 | 0.29 |       |
| IPI00827829 | HRV Fab N8-VL (Fragment)                           | R.ASGVPDRFSGSGSGTDFTLKISR.V  | 3 | 3.90 | 0.22 |       |
| IPI00827829 | HRV Fab N8-VL (Fragment)                           | R.FSGSGSGTDFTLK.I            | 1 | 2.83 | 0.22 |       |
| IPI00827829 | HRV Fab N8-VL (Fragment)                           | R.FSGSGSGTDFTLK.I            | 2 | 3.86 | 0.19 |       |
| IPI00827839 | VK3 protein (Fragment)                             | R.FSGSGAGTDFLTISR.L          | 2 | 3.76 | 0.39 |       |
| IPI00827839 | VK3 protein (Fragment)                             | R.LLIYGVSNR.A                | 2 | 2.23 | 0.21 |       |
| IPI00827846 | Anti-mucin1 heavy chain variable region (Fragment) | -.EVQLVESGGGVVQPGR.S         | 2 | 3.37 | 0.07 |       |
| IPI00827876 | Heavy chain Fab (Fragment)                         | -.QVKLLESGGGVVQPGR.S         | 2 | 3.62 | 0.09 |       |
| IPI00827876 | Heavy chain Fab (Fragment)                         | K.NTLYLQMNSLR.A              | 1 | 3.28 | 0.09 |       |
| IPI00827876 | Heavy chain Fab (Fragment)                         | K.NTLYLQMNSLR.A              | 2 | 4.45 | 0.07 |       |
| IPI00827876 | Heavy chain Fab (Fragment)                         | R.DNSM*NTLYLQM*NSLR.A        | 2 | 4.34 | 0.28 |       |
| IPI00827891 | Cold agglutinin FS-2 H-chain (Fragment)            | K.LSSVTAADTALYCAR.E          | 2 | 4.57 | 0.42 |       |
| IPI00827891 | Cold agglutinin FS-2 H-chain (Fragment)            | K.LSSVTAADTALYCAR.E          | 3 | 3.83 | 0.26 |       |
| IPI00827892 | VH87-2 protein (Fragment)                          | K.NTLYLQM*NSLK.T             | 2 | 2.43 | 0.12 |       |
| IPI00827892 | VH87-2 protein (Fragment)                          | K.NTLYLQMNSLK.T              | 2 | 3.59 | 0.08 |       |
| IPI00827892 | VH87-2 protein (Fragment)                          | K.TDGGTTDYAAPVKGR.F          | 2 | 4.36 | 0.39 |       |
| IPI00827892 | VH87-2 protein (Fragment)                          | K.TKTDGGTTDYAAPVKGR.L        | 3 | 2.88 | 0.27 |       |
| IPI00827892 | VH87-2 protein (Fragment)                          | R.DDSKNTLYLQM*NSLK.T         | 2 | 4.53 | 0.27 |       |
| IPI00827892 | VH87-2 protein (Fragment)                          | R.DDSKNTLYLQM*NSLK.T         | 3 | 3.61 | 0.23 |       |
| IPI00827906 | Anti-mucin1 light chain variable region (Fragment) | -.DIQM*TQSPSSLPASVGDR.V      | 2 | 5.08 | 0.29 |       |



|             |                                                    |                                  |   |      |      |       |
|-------------|----------------------------------------------------|----------------------------------|---|------|------|-------|
| IPI00827906 | Anti-mucin1 light chain variable region (Fragment) | -.DIQM*TQSPSSLPASVGDR.V          | 3 | 2.82 | 0.25 |       |
| IPI00827906 | Anti-mucin1 light chain variable region (Fragment) | -.DIQMTQSPSSLPASVGDR.V           | 2 | 4.30 | 0.27 |       |
| IPI00827929 | VH-3 family (VH26)D/J protein (Fragment)           | K.NTLYLQMNSLR.A                  | 1 | 3.28 | 0.09 |       |
| IPI00827929 | VH-3 family (VH26)D/J protein (Fragment)           | K.NTLYLQMNSLR.A                  | 2 | 4.45 | 0.07 |       |
| IPI00827929 | VH-3 family (VH26)D/J protein (Fragment)           | R.DNSKNTLYLQM*NSLR.A             | 2 | 3.02 | 0.07 |       |
| IPI00827929 | VH-3 family (VH26)D/J protein (Fragment)           | R.DNSKNTLYLQM*NSLR.A             | 3 | 3.90 | 0.23 |       |
| IPI00827939 | Anti-mucin1 light chain variable region (Fragment) | -.DIQM*TQSPSFLSASVGDR.V          | 2 | 4.46 | 0.33 |       |
| IPI00827939 | Anti-mucin1 light chain variable region (Fragment) | -.DIQM*TQSPSFLSASVGDR.V          | 3 | 3.56 | 0.08 |       |
| IPI00827939 | Anti-mucin1 light chain variable region (Fragment) | -.DIQMTQSPSFLSASVGDR.V           | 2 | 3.66 | 0.15 |       |
| IPI00827940 | Mu-chain precursor (Fragment)                      | C.EVQLLES GGGLVQPGGSLR.L         | 1 | 4.02 | 0.09 |       |
| IPI00827940 | Mu-chain precursor (Fragment)                      | C.EVQLLES GGGLVQPGGSLR.L         | 2 | 5.62 | 0.07 |       |
| IPI00827940 | Mu-chain precursor (Fragment)                      | K.NTLYLQMNSLR.A                  | 1 | 3.28 | 0.09 |       |
| IPI00827940 | Mu-chain precursor (Fragment)                      | K.NTLYLQMNSLR.A                  | 2 | 4.45 | 0.07 |       |
| IPI00827940 | Mu-chain precursor (Fragment)                      | R.DNSKNTLYLQM*NSLR.A             | 2 | 3.02 | 0.07 |       |
| IPI00827940 | Mu-chain precursor (Fragment)                      | R.DNSKNTLYLQM*NSLR.A             | 3 | 3.90 | 0.23 |       |
| IPI00827940 | Mu-chain precursor (Fragment)                      | R.LSCAASGFTFSTYAM*SWVR.Q         | 2 | 3.42 | 0.09 |       |
| IPI00827978 | VL4 protein (Fragment)                             | R.ITCQGDSL.R.G                   | 2 | 2.72 | 0.22 |       |
| IPI00828037 | Heavy chain Fab (Fragment)                         | R.VTM*SVDTSK.D                   | 2 | 2.55 | 0.18 |       |
| IPI00828083 | Heavy chain Fab (Fragment)                         | K.LTSVTAADTAMYCAR.Q              | 2 | 4.03 | 0.49 |       |
| IPI00828105 | Anti-Mpl scFv (Fragment)                           | K.NTLYLQMNSLR.A                  | 1 | 3.28 | 0.09 |       |
| IPI00828105 | Anti-Mpl scFv (Fragment)                           | K.NTLYLQMNSLR.A                  | 2 | 4.45 | 0.07 |       |
| IPI00828105 | Anti-Mpl scFv (Fragment)                           | R.DSSKNTLYLQM*NSLR.A             | 2 | 3.64 | 0.18 |       |
| IPI00828105 | Anti-Mpl scFv (Fragment)                           | S.DIQM*TQSPSTLSASIGDR.V          | 2 | 5.72 | 0.34 |       |
| IPI00828156 | NANUC-1 heavy chain (Fragment)                     | K.NTLYLQMNSLR.A                  | 1 | 3.28 | 0.09 |       |
| IPI00828156 | NANUC-1 heavy chain (Fragment)                     | K.NTLYLQMNSLR.A                  | 2 | 4.45 | 0.07 |       |
| IPI00828156 | NANUC-1 heavy chain (Fragment)                     | R.LSCAASGFTFR.S                  | 2 | 3.55 | 0.31 |       |
| IPI00828191 | NANUC-2 heavy chain (Fragment)                     | R.LSCAASGFTFR.S                  | 2 | 3.55 | 0.31 |       |
| IPI00828205 | IGHM protein                                       | C.EVQLLES GGGLVQPGGSLR.L         | 1 | 4.02 | 0.09 |       |
| IPI00828205 | IGHM protein                                       | C.EVQLLES GGGLVQPGGSLR.L         | 2 | 5.62 | 0.07 |       |
| IPI00828205 | IGHM protein                                       | H.SILTVSEEEWNTGETYTCVVAHEALPNR.V | 3 | 4.14 | 0.42 | -3.93 |
| IPI00828205 | IGHM protein                                       | K.DVM*QGTDEHVVCK.V               | 2 | 3.14 | 0.24 |       |
| IPI00828205 | IGHM protein                                       | K.ESDWLSQSM*FTCR.V               | 2 | 3.65 | 0.25 |       |
| IPI00828205 | IGHM protein                                       | K.ESDWLSQSMFTCR.V                | 2 | 3.80 | 0.42 |       |
| IPI00828205 | IGHM protein                                       | K.GVALHRPDVYLLPPAR.E             | 2 | 4.14 | 0.31 |       |
| IPI00828205 | IGHM protein                                       | K.GVALHRPDVYLLPPAR.E             | 3 | 4.42 | 0.26 |       |
| IPI00828205 | IGHM protein                                       | K.LICQATGFSPR.Q                  | 2 | 3.30 | 0.34 |       |
| IPI00828205 | IGHM protein                                       | K.NVPLPVIAELPPK.V                | 2 | 2.55 | 0.19 |       |
| IPI00828205 | IGHM protein                                       | K.NVPLPVIAELPPKVSFVPPR.D         | 2 | 4.20 | 0.33 |       |
| IPI00828205 | IGHM protein                                       | K.NVPLPVIAELPPKVSFVPPRDGFFGNPR.K | 3 | 2.62 | 0.22 |       |
| IPI00828205 | IGHM protein                                       | K.QVGSVTTDQVQAEAK.E              | 2 | 3.73 | 0.48 | -3.38 |
| IPI00828205 | IGHM protein                                       | K.QVGSVTTDQVQAEAKESGPTTYK.V      | 3 | 2.97 | 0.12 |       |
| IPI00828205 | IGHM protein                                       | K.SKLICQATGFSPR.Q                | 2 | 3.95 | 0.38 |       |

|             |                                         |                                      |   |      |      |       |
|-------------|-----------------------------------------|--------------------------------------|---|------|------|-------|
| IPI00828205 | IGHM protein                            | K.SKLICQATGFSPR.Q                    | 3 | 3.47 | 0.30 |       |
| IPI00828205 | IGHM protein                            | K.VSVFVPPRDGFFGNPR.K                 | 3 | 2.70 | 0.22 |       |
| IPI00828205 | IGHM protein                            | K.YAATSQVLLPSKDVM*QGTDEHVVCK.V       | 2 | 3.45 | 0.24 |       |
| IPI00828205 | IGHM protein                            | K.YAATSQVLLPSKDVM*QGTDEHVVCK.V       | 3 | 5.53 | 0.48 |       |
| IPI00828205 | IGHM protein                            | K.YVTSAPM*PEPQAPGR.Y                 | 2 | 3.06 | 0.40 | -4.52 |
| IPI00828205 | IGHM protein                            | K.YVTSAPMPEPQAPGR.Y                  | 2 | 3.15 | 0.35 |       |
| IPI00828205 | IGHM protein                            | R.DGFFGNPR.K                         | 2 | 2.88 | 0.34 | -3.78 |
| IPI00828205 | IGHM protein                            | R.DTLYLQM*NSLR.A                     | 2 | 3.47 | 0.16 |       |
| IPI00828205 | IGHM protein                            | R.EGKQVGSVTTDQVQAEAK.E               | 2 | 5.20 | 0.38 |       |
| IPI00828205 | IGHM protein                            | R.EGKQVGSVTTDQVQAEAK.E               | 3 | 4.78 | 0.06 |       |
| IPI00828205 | IGHM protein                            | R.FTCTVHTDLPSPLK.Q                   | 2 | 4.47 | 0.36 |       |
| IPI00828205 | IGHM protein                            | R.FTCTVHTDLPSPLK.Q                   | 3 | 3.66 | 0.36 |       |
| IPI00828205 | IGHM protein                            | R.GQPLSPEKYVTSAPM*PEPQAPGR.Y         | 2 | 3.82 | 0.40 |       |
| IPI00828205 | IGHM protein                            | R.TVDKSTGKPTLYNVSLVM*SDTAGTC.Y       | 3 | 5.71 | 0.42 |       |
| IPI00828205 | IGHM protein                            | R.TVDKSTGKPTLYNVSLVMSDTAGTCY.-       | 3 | 4.75 | 0.35 |       |
| IPI00828205 | IGHM protein                            | R.VFAIPPSFASIFLTK.S                  | 2 | 2.74 | 0.19 | -4.97 |
| IPI00828205 | IGHM protein                            | R.VFAIPPSFASIFLTK.S                  | 3 | 4.22 | 0.32 |       |
| IPI00828205 | IGHM protein                            | R.YFAHSILTVSEEEWNTGETYTCVVAHEALPNR.V | 3 | 6.30 | 0.58 | -4.67 |
| IPI00828205 | IGHM protein                            | R.YFAHSILTVSEEEWNTGETYTCVVAHEALPNR.V | 4 | 3.78 | 0.24 | -4.51 |
| IPI00829590 | Uncharacterized protein ENSP00000375044 | K.ANSYTTEYAASVK.G                    | 2 | 2.44 | 0.17 |       |
| IPI00829590 | Uncharacterized protein ENSP00000375044 | K.NSLYLQM*NSLK.T                     | 2 | 3.76 | 0.12 |       |
| IPI00829590 | Uncharacterized protein ENSP00000375044 | K.NSLYLQMNSLK.T                      | 2 | 2.77 | 0.06 |       |
| IPI00829590 | Uncharacterized protein ENSP00000375044 | R.FTISRDDSK.N                        | 2 | 2.52 | 0.15 |       |
| IPI00829590 | Uncharacterized protein ENSP00000375044 | R.NKANSYTTEYAASVK.G                  | 2 | 4.89 | 0.31 |       |
| IPI00829590 | Uncharacterized protein ENSP00000375044 | R.TEDTAVYYCAR.D                      | 2 | 4.05 | 0.24 |       |
| IPI00829626 | IGL@ protein                            | -.SYELTQPPSVSVSPGQTAR.I              | 2 | 5.32 | 0.55 |       |
| IPI00829626 | IGL@ protein                            | K.AAPSVTLFPPSSEELQANK.A              | 1 | 4.04 | 0.50 |       |
| IPI00829626 | IGL@ protein                            | K.AAPSVTLFPPSSEELQANK.A              | 2 | 3.15 | 0.34 | -1.50 |
| IPI00829626 | IGL@ protein                            | K.AAPSVTLFPPSSEELQANK.A              | 3 | 3.32 | 0.13 |       |
| IPI00829626 | IGL@ protein                            | K.ADSSPVKAGVETTTPSK.Q                | 1 | 3.85 | 0.37 |       |
| IPI00829626 | IGL@ protein                            | K.ADSSPVKAGVETTTPSK.Q                | 2 | 3.50 | 0.38 |       |
| IPI00829626 | IGL@ protein                            | K.ADSSPVKAGVETTTPSK.Q                | 3 | 3.46 | 0.35 |       |
| IPI00829626 | IGL@ protein                            | K.ADSSPVKAGVETTTPSKQSNK.Y            | 2 | 5.35 | 0.42 |       |
| IPI00829626 | IGL@ protein                            | K.ADSSPVKAGVETTTPSKQSNK.Y            | 3 | 4.61 | 0.23 |       |
| IPI00829626 | IGL@ protein                            | K.AGVETTTPSK.Q                       | 2 | 2.62 | 0.09 | -3.23 |
| IPI00829626 | IGL@ protein                            | K.AGVETTTPSKQSNK.Y                   | 2 | 4.14 | 0.32 |       |
| IPI00829626 | IGL@ protein                            | K.AGVETTTPSKQSNKYAASSYLSLTPEQWK.S    | 3 | 5.47 | 0.40 |       |
| IPI00829626 | IGL@ protein                            | K.ATLVCLISDFYPGAVTVAWK.A             | 2 | 5.07 | 0.50 |       |
| IPI00829626 | IGL@ protein                            | K.ATLVCLISDFYPGAVTVAWK.A             | 3 | 3.53 | 0.31 | -3.63 |
| IPI00829626 | IGL@ protein                            | K.ATLVCLISDFYPGAVTVAWKADSSPVK.A      | 3 | 3.81 | 0.20 |       |
| IPI00829626 | IGL@ protein                            | K.QSNKYAASSYLSLTPEQWK.S              | 2 | 5.38 | 0.37 |       |
| IPI00829626 | IGL@ protein                            | K.QSNKYAASSYLSLTPEQWK.S              | 3 | 4.26 | 0.33 |       |

|             |                                          |                                                |   |      |      |       |
|-------------|------------------------------------------|------------------------------------------------|---|------|------|-------|
| IPI00829626 | IGL@ protein                             | K.YAASSYLSLTPEQWK.S                            | 1 | 3.49 | 0.43 |       |
| IPI00829626 | IGL@ protein                             | K.YAASSYLSLTPEQWK.S                            | 2 | 5.52 | 0.47 |       |
| IPI00829626 | IGL@ protein                             | K.YAASSYLSLTPEQWK.S                            | 3 | 3.44 | 0.22 |       |
| IPI00829626 | IGL@ protein                             | R.ITCSGDALPK.Q                                 | 2 | 2.29 | 0.17 |       |
| IPI00829626 | IGL@ protein                             | R.SYSCQVTHEGSTVEK.T                            | 1 | 3.84 | 0.43 |       |
| IPI00829626 | IGL@ protein                             | R.SYSCQVTHEGSTVEK.T                            | 2 | 3.17 | 0.41 | -4.10 |
| IPI00829626 | IGL@ protein                             | R.SYSCQVTHEGSTVEKTVAPTECS.-                    | 2 | 5.35 | 0.45 |       |
| IPI00829626 | IGL@ protein                             | R.SYSCQVTHEGSTVEKTVAPTECS.-                    | 3 | 2.78 | 0.26 |       |
| IPI00829640 | IGL@ protein                             | -.SELTQDPAVSVALGQTVR.I                         | 2 | 4.69 | 0.23 |       |
| IPI00829640 | IGL@ protein                             | -.SELTQDPAVSVALGQTVR.I                         | 3 | 5.07 | 0.32 |       |
| IPI00829640 | IGL@ protein                             | K.ADGSPVKAGVETTKPSK.Q                          | 2 | 3.18 | 0.20 |       |
| IPI00829640 | IGL@ protein                             | K.ADGSPVKAGVETTKPSK.Q                          | 3 | 3.41 | 0.23 |       |
| IPI00829640 | IGL@ protein                             | K.AGVETTKPSK.Q                                 | 2 | 2.24 | 0.11 | -2.24 |
| IPI00829640 | IGL@ protein                             | K.ANPTVTLFPPSSEELQANK.A                        | 2 | 4.70 | 0.37 |       |
| IPI00829640 | IGL@ protein                             | K.ATLVCLISDFYPGA VTVAWK.A                      | 2 | 5.07 | 0.50 |       |
| IPI00829640 | IGL@ protein                             | K.ATLVCLISDFYPGA VTVAWK.A                      | 3 | 3.53 | 0.31 | -3.63 |
| IPI00829640 | IGL@ protein                             | K.QSNNKYAASSYLSLTPEQWK.S                       | 2 | 5.38 | 0.37 |       |
| IPI00829640 | IGL@ protein                             | K.QSNNKYAASSYLSLTPEQWK.S                       | 3 | 4.26 | 0.33 |       |
| IPI00829640 | IGL@ protein                             | K.VTVLGQPK.A                                   | 1 | 2.16 | 0.20 |       |
| IPI00829640 | IGL@ protein                             | K.VTVLGQPK.A                                   | 2 | 2.72 | 0.15 |       |
| IPI00829640 | IGL@ protein                             | K.YAASSYLSLTPEQWK.S                            | 1 | 3.49 | 0.43 |       |
| IPI00829640 | IGL@ protein                             | K.YAASSYLSLTPEQWK.S                            | 2 | 5.52 | 0.47 |       |
| IPI00829640 | IGL@ protein                             | K.YAASSYLSLTPEQWK.S                            | 3 | 3.44 | 0.22 |       |
| IPI00829640 | IGL@ protein                             | R.ITCQGDSL.R.G                                 | 2 | 2.72 | 0.22 |       |
| IPI00829640 | IGL@ protein                             | R.SYSCQVTHEGSTVEK.T                            | 1 | 3.84 | 0.43 |       |
| IPI00829640 | IGL@ protein                             | R.SYSCQVTHEGSTVEK.T                            | 2 | 3.17 | 0.41 | -4.10 |
| IPI00829640 | IGL@ protein                             | R.SYSCQVTHEGSTVEKTVAPTECS.-                    | 2 | 5.35 | 0.45 |       |
| IPI00829640 | IGL@ protein                             | R.SYSCQVTHEGSTVEKTVAPTECS.-                    | 3 | 2.78 | 0.26 |       |
| IPI00829663 | Uncharacterized protein ENSP00000374801  | G.DVVM*TSPLSLPVTLGQPASISCR.S                   | 2 | 5.13 | 0.37 |       |
| IPI00829663 | Uncharacterized protein ENSP00000374801  | G.DVVM*TSPLSLPVTLGQPASISCR.S                   | 3 | 6.55 | 0.44 |       |
| IPI00829663 | Uncharacterized protein ENSP00000374801  | R.DSGVPDRFSGSGSGTDFTLK.I                       | 2 | 4.03 | 0.34 |       |
| IPI00829663 | Uncharacterized protein ENSP00000374801  | R.DSGVPDRFSGSGSGTDFTLK.I                       | 3 | 2.77 | 0.24 |       |
| IPI00829663 | Uncharacterized protein ENSP00000374801  | R.FSGSGSGTDFTLK.I                              | 1 | 2.83 | 0.22 |       |
| IPI00829663 | Uncharacterized protein ENSP00000374801  | R.FSGSGSGTDFTLK.I                              | 2 | 3.86 | 0.19 |       |
| IPI00829663 | Uncharacterized protein ENSP00000374801  | R.SSQSLVYSDGNTYLNWFQQRPGQSPR.R                 | 3 | 5.72 | 0.25 |       |
| IPI00829701 | Uncharacterized protein ENSP00000375014  | R.SDDTAVYYCAR.R                                | 2 | 3.57 | 0.35 |       |
| IPI00829701 | Uncharacterized protein ENSP00000375014  | R.SLRSDTAVYYCAR.R                              | 2 | 4.54 | 0.26 |       |
| IPI00829701 | Uncharacterized protein ENSP00000375014  | R.VTM*TTDTSTSTAYM*ELR.S                        | 2 | 5.33 | 0.47 |       |
| IPI00829701 | Uncharacterized protein ENSP00000375014  | R.VTM*TTDTSTSTAYMELR.S                         | 2 | 5.15 | 0.48 |       |
| IPI00829701 | Uncharacterized protein ENSP00000375014  | R.VTMTTDTSTSTAYMELR.S                          | 2 | 4.05 | 0.35 |       |
| IPI00829711 | Uncharacterized protein IGHA2 (Fragment) | K.SAVQGPPER.D                                  | 2 | 2.30 | 0.12 | 0.79  |
| IPI00829711 | Uncharacterized protein IGHA2 (Fragment) | K.SAVQGPPERDLGCGYSVSVLPGCAQPNHGETFTCTAAHPELK.T | 3 | 3.92 | 0.18 |       |

|             |                                          |                                         |   |      |      |       |
|-------------|------------------------------------------|-----------------------------------------|---|------|------|-------|
| IPI00829711 | Uncharacterized protein IGHA2 (Fragment) | K.SGNTFRPEVHLLPPPSEELALNELVTLTCLAR.G    | 2 | 4.32 | 0.41 |       |
| IPI00829711 | Uncharacterized protein IGHA2 (Fragment) | K.SGNTFRPEVHLLPPPSEELALNELVTLTCLAR.G    | 3 | 6.86 | 0.60 |       |
| IPI00829711 | Uncharacterized protein IGHA2 (Fragment) | K.YLTWASR.Q                             | 1 | 1.98 | 0.18 |       |
| IPI00829711 | Uncharacterized protein IGHA2 (Fragment) | K.YLTWASR.Q                             | 2 | 1.93 | 0.24 |       |
| IPI00829711 | Uncharacterized protein IGHA2 (Fragment) | R.DASGATFTWTPSSGK.S                     | 2 | 4.55 | 0.44 |       |
| IPI00829711 | Uncharacterized protein IGHA2 (Fragment) | R.DLCGCYSVSSVLPGCAQPWNHGETFTCTAAHPELK.T | 3 | 5.72 | 0.26 |       |
| IPI00829711 | Uncharacterized protein IGHA2 (Fragment) | R.EKYLWASR.Q                            | 1 | 2.49 | 0.27 |       |
| IPI00829711 | Uncharacterized protein IGHA2 (Fragment) | R.GFSPKDVLR.W                           | 2 | 2.81 | 0.13 |       |
| IPI00829711 | Uncharacterized protein IGHA2 (Fragment) | R.NFPPSQDASGDLYTTSSQLTLPATQCPDGK.S      | 2 | 3.66 | 0.39 |       |
| IPI00829711 | Uncharacterized protein IGHA2 (Fragment) | R.NFPPSQDASGDLYTTSSQLTLPATQCPDGK.S      | 3 | 5.98 | 0.54 |       |
| IPI00829711 | Uncharacterized protein IGHA2 (Fragment) | R.VAAEDWK.K                             | 2 | 2.23 | 0.16 |       |
| IPI00829711 | Uncharacterized protein IGHA2 (Fragment) | R.WLQGSQELPR.E                          | 1 | 3.00 | 0.19 |       |
| IPI00829711 | Uncharacterized protein IGHA2 (Fragment) | R.WLQGSQELPR.E                          | 2 | 3.80 | 0.33 |       |
| IPI00829711 | Uncharacterized protein IGHA2 (Fragment) | R.WLQGSQELPREK.Y                        | 2 | 2.71 | 0.15 |       |
| IPI00829740 | V2-6 protein                             | R.FSGNSGNTATLTISR.V                     | 1 | 3.22 | 0.40 |       |
| IPI00829740 | V2-6 protein                             | R.FSGNSGNTATLTISR.V                     | 2 | 4.32 | 0.38 |       |
| IPI00829740 | V2-6 protein                             | R.ITCGGNNIGSK.S                         | 2 | 2.81 | 0.18 |       |
| IPI00829740 | V2-6 protein                             | S.YELTQPLSVSVALGQTAR.I                  | 2 | 5.13 | 0.09 |       |
| IPI00829752 | Uncharacterized protein ENSP00000375029  | C.EVQLVESGGVVVQPGGSLR.L                 | 2 | 5.73 | 0.27 |       |
| IPI00829752 | Uncharacterized protein ENSP00000375029  | K.NSLYLQM*NSLR.A                        | 2 | 3.76 | 0.14 |       |
| IPI00829752 | Uncharacterized protein ENSP00000375029  | K.NSLYLQMNSLR.A                         | 1 | 3.55 | 0.11 |       |
| IPI00829752 | Uncharacterized protein ENSP00000375029  | K.NSLYLQMNSLR.A                         | 2 | 4.01 | 0.17 |       |
| IPI00829752 | Uncharacterized protein ENSP00000375029  | R.DNSKNSLYLQM*NSLR.A                    | 2 | 4.94 | 0.16 |       |
| IPI00829752 | Uncharacterized protein ENSP00000375029  | R.DNSKNSLYLQM*NSLR.A                    | 3 | 4.24 | 0.22 |       |
| IPI00829759 | Uncharacterized protein ENSP00000375040  | K.NTLYLQMGSLR.A                         | 2 | 2.91 | 0.30 |       |
| IPI00829767 | Uncharacterized protein IGHG2 (Fragment) | C.PPCPAPPVAGPSVFLFPPKPK.D               | 3 | 6.61 | 0.48 |       |
| IPI00829767 | Uncharacterized protein IGHG2 (Fragment) | K.CCVECPCPAPPVAGPSVFLFPPKPK.D           | 2 | 4.27 | 0.44 |       |
| IPI00829767 | Uncharacterized protein IGHG2 (Fragment) | K.CCVECPCPAPPVAGPSVFLFPPKPK.D           | 3 | 5.21 | 0.49 |       |
| IPI00829767 | Uncharacterized protein IGHG2 (Fragment) | K.CCVECPCPAPPVAGPSVFLFPPKPKDTLM*ISR.T   | 3 | 4.29 | 0.43 |       |
| IPI00829767 | Uncharacterized protein IGHG2 (Fragment) | K.CKVSNKGLPAPIEK.T                      | 3 | 2.67 | 0.22 |       |
| IPI00829767 | Uncharacterized protein IGHG2 (Fragment) | K.DTLM*ISR.T                            | 2 | 2.48 | 0.09 | -3.74 |
| IPI00829767 | Uncharacterized protein IGHG2 (Fragment) | K.DTLMISR.T                             | 1 | 2.38 | 0.13 |       |
| IPI00829767 | Uncharacterized protein IGHG2 (Fragment) | K.DTLMISR.T                             | 2 | 2.45 | 0.16 |       |
| IPI00829767 | Uncharacterized protein IGHG2 (Fragment) | K.FNWWYVDGVEVHNAK.T                     | 1 | 3.93 | 0.41 |       |
| IPI00829767 | Uncharacterized protein IGHG2 (Fragment) | K.FNWWYVDGVEVHNAK.T                     | 2 | 5.51 | 0.51 |       |
| IPI00829767 | Uncharacterized protein IGHG2 (Fragment) | K.FNWWYVDGVEVHNAK.T                     | 3 | 3.99 | 0.38 |       |
| IPI00829767 | Uncharacterized protein IGHG2 (Fragment) | K.GFYPSDISVEWESNGQPENNYK.T              | 2 | 4.89 | 0.35 |       |
| IPI00829767 | Uncharacterized protein IGHG2 (Fragment) | K.GFYPSDISVEWESNGQPENNYK.T              | 3 | 5.75 | 0.38 |       |
| IPI00829767 | Uncharacterized protein IGHG2 (Fragment) | K.GQPREPQVYTLPPSR.E                     | 2 | 2.89 | 0.13 |       |
| IPI00829767 | Uncharacterized protein IGHG2 (Fragment) | K.GQPREPQVYTLPPSR.E                     | 3 | 2.92 | 0.17 |       |
| IPI00829767 | Uncharacterized protein IGHG2 (Fragment) | K.GQPREPQVYTLPPSREEM*TK.N               | 3 | 3.87 | 0.30 |       |
| IPI00829767 | Uncharacterized protein IGHG2 (Fragment) | K.GQPREPQVYTLPPSREEM*TKNQVSLTCLVK.G     | 3 | 3.18 | 0.26 |       |

|             |                                          |                                        |   |      |      |       |
|-------------|------------------------------------------|----------------------------------------|---|------|------|-------|
| IPI00829767 | Uncharacterized protein IGHG2 (Fragment) | K.GQPREPQVYTLPPSREEMTK.N               | 3 | 3.97 | 0.17 |       |
| IPI00829767 | Uncharacterized protein IGHG2 (Fragment) | K.NQVSLTCLVK.G                         | 1 | 2.26 | 0.22 |       |
| IPI00829767 | Uncharacterized protein IGHG2 (Fragment) | K.NQVSLTCLVK.G                         | 2 | 2.44 | 0.28 | -2.15 |
| IPI00829767 | Uncharacterized protein IGHG2 (Fragment) | K.TKGQPREPQVYTLPPSREEM*TK.N            | 3 | 3.08 | 0.11 |       |
| IPI00829767 | Uncharacterized protein IGHG2 (Fragment) | K.VSNKGLPAPIEK.T                       | 1 | 2.10 | 0.15 |       |
| IPI00829767 | Uncharacterized protein IGHG2 (Fragment) | K.VSNKGLPAPIEK.T                       | 2 | 3.30 | 0.19 |       |
| IPI00829767 | Uncharacterized protein IGHG2 (Fragment) | K.WYVDGVEVHNAK.T                       | 1 | 2.91 | 0.35 |       |
| IPI00829767 | Uncharacterized protein IGHG2 (Fragment) | K.WYVDGVEVHNAK.T                       | 2 | 3.90 | 0.46 |       |
| IPI00829767 | Uncharacterized protein IGHG2 (Fragment) | K.WYVDGVEVHNAK.T                       | 3 | 2.99 | 0.21 |       |
| IPI00829767 | Uncharacterized protein IGHG2 (Fragment) | R.EEM*TKNQVSLTCLVK.G                   | 2 | 3.75 | 0.32 |       |
| IPI00829767 | Uncharacterized protein IGHG2 (Fragment) | R.EPQVYTLPPSREEM*TK.N                  | 1 | 2.26 | 0.37 |       |
| IPI00829767 | Uncharacterized protein IGHG2 (Fragment) | R.EPQVYTLPPSREEM*TK.N                  | 2 | 4.02 | 0.44 |       |
| IPI00829767 | Uncharacterized protein IGHG2 (Fragment) | R.EPQVYTLPPSREEM*TKNQVSLTCLVK.G        | 3 | 2.94 | 0.15 |       |
| IPI00829767 | Uncharacterized protein IGHG2 (Fragment) | R.EPQVYTLPPSREEMTK.N                   | 1 | 2.97 | 0.15 |       |
| IPI00829767 | Uncharacterized protein IGHG2 (Fragment) | R.EPQVYTLPPSREEMTK.N                   | 2 | 3.92 | 0.38 |       |
| IPI00829767 | Uncharacterized protein IGHG2 (Fragment) | R.EPQVYTLPPSREEMTKNQVSLTCLVK.G         | 3 | 3.59 | 0.25 |       |
| IPI00829767 | Uncharacterized protein IGHG2 (Fragment) | R.KCCVECPCPAPPVAGPSVFLFPPKPK.D         | 2 | 3.33 | 0.41 |       |
| IPI00829767 | Uncharacterized protein IGHG2 (Fragment) | R.KCCVECPCPAPPVAGPSVFLFPPKPK.D         | 3 | 5.71 | 0.46 |       |
| IPI00829767 | Uncharacterized protein IGHG2 (Fragment) | R.KCCVECPCPAPPVAGPSVFLFPPKPKDTLM*ISR.T | 3 | 4.57 | 0.37 |       |
| IPI00829767 | Uncharacterized protein IGHG2 (Fragment) | R.TPEVTCVVVDVSHED.P                    | 2 | 5.50 | 0.52 |       |
| IPI00829767 | Uncharacterized protein IGHG2 (Fragment) | R.VVSVLTVVHQDWLNGK.E                   | 1 | 4.17 | 0.39 |       |
| IPI00829767 | Uncharacterized protein IGHG2 (Fragment) | R.VVSVLTVVHQDWLNGK.E                   | 2 | 5.13 | 0.46 |       |
| IPI00829767 | Uncharacterized protein IGHG2 (Fragment) | R.VVSVLTVVHQDWLNGK.E                   | 3 | 3.17 | 0.25 |       |
| IPI00829767 | Uncharacterized protein IGHG2 (Fragment) | R.VVSVLTVVHQDWLNGKEYK.C                | 2 | 5.56 | 0.47 |       |
| IPI00829767 | Uncharacterized protein IGHG2 (Fragment) | R.VVSVLTVVHQDWLNGKEYK.C                | 3 | 4.44 | 0.35 |       |
| IPI00829767 | Uncharacterized protein IGHG2 (Fragment) | V.SVLTVVHQDWLNGKEYK.C                  | 2 | 5.09 | 0.35 |       |
| IPI00829810 | Uncharacterized protein ENSP00000375027  | K.NTLYLQMNNLR.A                        | 2 | 3.38 | 0.24 |       |
| IPI00829810 | Uncharacterized protein ENSP00000375027  | R.DNSKNTLYLQM*NNLR.A                   | 2 | 4.19 | 0.25 |       |
| IPI00829812 | Uncharacterized protein ENSP00000375011  | K.NSLYLQM*NSLR.A                       | 2 | 3.76 | 0.14 |       |
| IPI00829812 | Uncharacterized protein ENSP00000375011  | K.NSLYLQMNSLR.A                        | 1 | 3.55 | 0.11 |       |
| IPI00829812 | Uncharacterized protein ENSP00000375011  | K.NSLYLQMNSLR.A                        | 2 | 4.01 | 0.17 |       |
| IPI00829812 | Uncharacterized protein ENSP00000375011  | R.FTISRENAK.D                          | 2 | 2.23 | 0.18 |       |
| IPI00829827 | Uncharacterized protein ENSP00000374804  | R.FSGSGAGTDFTLK.I                      | 2 | 3.15 | 0.28 |       |
| IPI00829827 | Uncharacterized protein ENSP00000374804  | R.FSGVPDRFSGSGAGTDFTLK.I               | 2 | 3.86 | 0.30 |       |
| IPI00829827 | Uncharacterized protein ENSP00000374804  | R.FSGVPDRFSGSGAGTDFTLK.I               | 3 | 3.87 | 0.32 |       |
| IPI00829834 | Ig kappa chain V-III region VH precursor | R.EIVMTQSPPTLSLSPGER.V                 | 1 | 1.59 | 0.34 |       |
| IPI00829834 | Ig kappa chain V-III region VH precursor | R.EIVMTQSPPTLSLSPGER.V                 | 2 | 4.42 | 0.21 |       |
| IPI00829834 | Ig kappa chain V-III region VH precursor | R.LLIYGASTR.A                          | 2 | 3.10 | 0.20 |       |
| IPI00829836 | Uncharacterized protein ENSP00000374797  | -.DIQLTQSPSSLSASVGDR.V                 | 2 | 5.58 | 0.47 |       |
| IPI00829836 | Uncharacterized protein ENSP00000374797  | -.DIQLTQSPSSLSASVGDR.V                 | 3 | 3.69 | 0.30 |       |
| IPI00829841 | 13 kDa protein                           | K.TEDTAVYYCTR.D                        | 2 | 4.38 | 0.33 |       |
| IPI00829841 | 13 kDa protein                           | R.DDSKNTAYLQM*NSLK.T                   | 2 | 2.69 | 0.18 |       |

|             |                                                                                            |                                        |   |      |      |       |
|-------------|--------------------------------------------------------------------------------------------|----------------------------------------|---|------|------|-------|
| IPI00829841 | 13 kDa protein                                                                             | R.FTISRDDSK.N                          | 2 | 2.52 | 0.15 |       |
| IPI00829877 | IGL@ protein                                                                               | A.SYDLTQPPSVSVSPGQTAR.I                | 2 | 5.30 | 0.44 |       |
| IPI00829877 | IGL@ protein                                                                               | K.AAPSVTLFPPSSEELQANK.A                | 1 | 4.04 | 0.50 |       |
| IPI00829877 | IGL@ protein                                                                               | K.AAPSVTLFPPSSEELQANK.A                | 2 | 3.15 | 0.34 | -1.50 |
| IPI00829877 | IGL@ protein                                                                               | K.AAPSVTLFPPSSEELQANK.A                | 3 | 3.32 | 0.13 |       |
| IPI00829877 | IGL@ protein                                                                               | K.ADSSPVKAGVETTTPSK.Q                  | 1 | 3.85 | 0.37 |       |
| IPI00829877 | IGL@ protein                                                                               | K.ADSSPVKAGVETTTPSK.Q                  | 2 | 3.50 | 0.38 |       |
| IPI00829877 | IGL@ protein                                                                               | K.ADSSPVKAGVETTTPSK.Q                  | 3 | 3.46 | 0.35 |       |
| IPI00829877 | IGL@ protein                                                                               | K.ADSSPVKAGVETTTPSKQSNK.Y              | 2 | 5.35 | 0.42 |       |
| IPI00829877 | IGL@ protein                                                                               | K.ADSSPVKAGVETTTPSKQSNK.Y              | 3 | 4.61 | 0.23 |       |
| IPI00829877 | IGL@ protein                                                                               | K.AGVETTTPSK.Q                         | 2 | 2.62 | 0.09 | -3.23 |
| IPI00829877 | IGL@ protein                                                                               | K.AGVETTTPSKQSNK.Y                     | 2 | 4.14 | 0.32 |       |
| IPI00829877 | IGL@ protein                                                                               | K.ATLVCLISDFYPGAVTVAWK.A               | 2 | 5.07 | 0.50 |       |
| IPI00829877 | IGL@ protein                                                                               | K.ATLVCLISDFYPGAVTVAWK.A               | 3 | 3.53 | 0.31 | -3.63 |
| IPI00829877 | IGL@ protein                                                                               | K.ATLVCLISDFYPGAVTVAWKADSSPVK.A        | 3 | 3.81 | 0.20 |       |
| IPI00829877 | IGL@ protein                                                                               | K.SGQAPVLVIYEDSKRPSGIPER.F             | 3 | 3.16 | 0.15 |       |
| IPI00829877 | IGL@ protein                                                                               | K.VTVLGQPK.A                           | 1 | 2.16 | 0.20 |       |
| IPI00829877 | IGL@ protein                                                                               | K.VTVLGQPK.A                           | 2 | 2.72 | 0.15 |       |
| IPI00829877 | IGL@ protein                                                                               | R.ITCSGDALPR.K                         | 2 | 2.36 | 0.22 |       |
| IPI00829877 | IGL@ protein                                                                               | R.SYSCQVTHEGSTVEK.T                    | 1 | 3.84 | 0.43 |       |
| IPI00829877 | IGL@ protein                                                                               | R.SYSCQVTHEGSTVEK.T                    | 2 | 3.17 | 0.41 | -4.10 |
| IPI00829877 | IGL@ protein                                                                               | R.SYSCQVTHEGSTVEKTVAPTECS.-            | 2 | 5.35 | 0.45 |       |
| IPI00829877 | IGL@ protein                                                                               | R.SYSCQVTHEGSTVEKTVAPTECS.-            | 3 | 2.78 | 0.26 |       |
| IPI00829947 | 13 kDa protein                                                                             | -.DIVM* <u>TQSP</u> LSLPVTPGEPASISCR.S | 2 | 5.32 | 0.47 |       |
| IPI00829947 | 13 kDa protein                                                                             | -.DIVM* <u>TQSP</u> LSLPVTPGEPASISCR.S | 3 | 5.28 | 0.41 |       |
| IPI00829947 | 13 kDa protein                                                                             | -.DIVM <u>TQSP</u> LSLPVTPGEPASISCR.S  | 2 | 4.80 | 0.34 |       |
| IPI00829947 | 13 kDa protein                                                                             | -.DIVM <u>TQSP</u> LSLPVTPGEPASISCR.S  | 3 | 4.58 | 0.31 |       |
| IPI00829947 | 13 kDa protein                                                                             | R.ASGVPDRFSGSGSGTDFTLK.I               | 2 | 4.21 | 0.34 |       |
| IPI00829947 | 13 kDa protein                                                                             | R.ASGVPDRFSGSGSGTDFTLK.I               | 3 | 4.21 | 0.29 |       |
| IPI00829947 | 13 kDa protein                                                                             | R.ASGVPDRFSGSGSGTDFTLKISR.V            | 3 | 3.90 | 0.22 |       |
| IPI00829947 | 13 kDa protein                                                                             | R.FSGSGSGTDFTLK.I                      | 1 | 2.83 | 0.22 |       |
| IPI00829947 | 13 kDa protein                                                                             | R.FSGSGSGTDFTLK.I                      | 2 | 3.86 | 0.19 |       |
| IPI00829980 | Myosin-reactive immunoglobulin light chain variable region (Fragment)                      | R.FSGSGSGTDFTLTISSLQPEDVATYYCQK.Y      | 2 | 3.42 | 0.36 |       |
| IPI00829980 | Myosin-reactive immunoglobulin light chain variable region (Fragment)                      | R.FSGSGSGTDFTLTISSLQPEDVATYYCQK.Y      | 3 | 4.13 | 0.11 |       |
| IPI00830018 | Uncharacterized protein ENSP00000374807                                                    | C.NIQM* <u>TQSP</u> SAMSASVGDR.V       | 2 | 5.26 | 0.13 |       |
| IPI00830025 | Uncharacterized protein ENSP00000375021                                                    | R.VTM* <u>SVDT</u> SK.D                | 2 | 2.55 | 0.18 |       |
| IPI00830035 | Similar to Anti-streptococcal/anti-myosin immunoglobulin kappa light chain variable region | K.ASSLESGVPSR.F                        | 1 | 2.20 | 0.17 |       |
| IPI00830035 | Similar to Anti-streptococcal/anti-myosin immunoglobulin kappa light chain variable region | K.ASSLESGVPSR.F                        | 2 | 3.26 | 0.30 |       |

|             |                                                                                            |                                       |   |      |      |       |
|-------------|--------------------------------------------------------------------------------------------|---------------------------------------|---|------|------|-------|
| IPI00830035 | Similar to Anti-streptococcal/anti-myosin immunoglobulin kappa light chain variable region | K.LLIYDASSLESGVPSR.F                  | 2 | 4.26 | 0.31 |       |
| IPI00830044 | Uncharacterized protein ENSP00000374806                                                    | K.YASQSIGVPSR.F                       | 2 | 3.03 | 0.34 |       |
| IPI00830047 | Uncharacterized protein ENSP00000374858 (Fragment)                                         | K.AAPSVTLFPPSSEELQANK.A               | 1 | 4.04 | 0.50 |       |
| IPI00830047 | Uncharacterized protein ENSP00000374858 (Fragment)                                         | K.AAPSVTLFPPSSEELQANK.A               | 2 | 3.15 | 0.34 | -1.50 |
| IPI00830047 | Uncharacterized protein ENSP00000374858 (Fragment)                                         | K.AAPSVTLFPPSSEELQANK.A               | 3 | 3.32 | 0.13 |       |
| IPI00830047 | Uncharacterized protein ENSP00000374858 (Fragment)                                         | K.AGVETTTPSK.Q                        | 2 | 2.62 | 0.09 | -3.23 |
| IPI00830047 | Uncharacterized protein ENSP00000374858 (Fragment)                                         | K.AGVETTTPSKQSNK.Y                    | 2 | 4.14 | 0.32 |       |
| IPI00830047 | Uncharacterized protein ENSP00000374858 (Fragment)                                         | K.AGVETTTPSKQSNKYAASSYLSLTPEQWK.S     | 3 | 5.47 | 0.40 |       |
| IPI00830047 | Uncharacterized protein ENSP00000374858 (Fragment)                                         | K.QSNKYAASSYLSLTPEQWK.S               | 2 | 5.38 | 0.37 |       |
| IPI00830047 | Uncharacterized protein ENSP00000374858 (Fragment)                                         | K.QSNKYAASSYLSLTPEQWK.S               | 3 | 4.26 | 0.33 |       |
| IPI00830047 | Uncharacterized protein ENSP00000374858 (Fragment)                                         | K.YAASSYLSLTPEQWK.S                   | 1 | 3.49 | 0.43 |       |
| IPI00830047 | Uncharacterized protein ENSP00000374858 (Fragment)                                         | K.YAASSYLSLTPEQWK.S                   | 2 | 5.52 | 0.47 |       |
| IPI00830047 | Uncharacterized protein ENSP00000374858 (Fragment)                                         | K.YAASSYLSLTPEQWK.S                   | 3 | 3.44 | 0.22 |       |
| IPI00830047 | Uncharacterized protein ENSP00000374858 (Fragment)                                         | R.SYSCQVTHEGSTVEK.T                   | 1 | 3.84 | 0.43 |       |
| IPI00830047 | Uncharacterized protein ENSP00000374858 (Fragment)                                         | R.SYSCQVTHEGSTVEK.T                   | 2 | 3.17 | 0.41 | -4.10 |
| IPI00830051 | Similar to Immunoglobulin heavy chain                                                      | K.RPGESLR.I                           | 2 | 2.64 | 0.08 |       |
| IPI00830057 | Uncharacterized protein ENSP00000374791                                                    | K.YASQSFSGVPSR.F                      | 2 | 3.32 | 0.34 |       |
| IPI00830107 | V4-2 protein                                                                               | R.YKSDSDKQQGSGVPSR.F                  | 3 | 3.86 | 0.25 |       |
| IPI00830122 | A30                                                                                        | K.RLIYAASSLQSGVPSR.F                  | 2 | 5.13 | 0.21 |       |
| IPI00830132 | Uncharacterized protein IGHG4 (Fragment)                                                   | K.AKGQPREPQVYTLPPSQEEM*TK.N           | 2 | 3.25 | 0.17 |       |
| IPI00830132 | Uncharacterized protein IGHG4 (Fragment)                                                   | K.AKGQPREPQVYTLPPSQEEM*TK.N           | 3 | 3.55 | 0.26 |       |
| IPI00830132 | Uncharacterized protein IGHG4 (Fragment)                                                   | K.AKGQPREPQVYTLPPSQEEM*TKNQVSLTCLVK.G | 3 | 4.21 | 0.19 |       |
| IPI00830132 | Uncharacterized protein IGHG4 (Fragment)                                                   | K.DTLM*ISR.T                          | 2 | 2.48 | 0.09 | -3.74 |
| IPI00830132 | Uncharacterized protein IGHG4 (Fragment)                                                   | K.DTLMISR.T                           | 1 | 2.38 | 0.13 |       |
| IPI00830132 | Uncharacterized protein IGHG4 (Fragment)                                                   | K.DTLMISR.T                           | 2 | 2.45 | 0.16 |       |
| IPI00830132 | Uncharacterized protein IGHG4 (Fragment)                                                   | K.FNWWYVDGVEVHNAK.T                   | 1 | 3.93 | 0.41 |       |
| IPI00830132 | Uncharacterized protein IGHG4 (Fragment)                                                   | K.FNWWYVDGVEVHNAK.T                   | 2 | 5.51 | 0.51 |       |
| IPI00830132 | Uncharacterized protein IGHG4 (Fragment)                                                   | K.FNWWYVDGVEVHNAK.T                   | 3 | 3.99 | 0.38 |       |

|             |                                                 |                                     |   |      |      |       |
|-------------|-------------------------------------------------|-------------------------------------|---|------|------|-------|
| IPI00830132 | Uncharacterized protein IGHG4 (Fragment)        | K.GFYPSDIAVEWESNGQPENNYK.T          | 2 | 4.88 | 0.31 |       |
| IPI00830132 | Uncharacterized protein IGHG4 (Fragment)        | K.GFYPSDIAVEWESNGQPENNYK.T          | 3 | 4.56 | 0.26 |       |
| IPI00830132 | Uncharacterized protein IGHG4 (Fragment)        | K.GPSVFPLAPCSR.S                    | 1 | 2.54 | 0.34 |       |
| IPI00830132 | Uncharacterized protein IGHG4 (Fragment)        | K.GPSVFPLAPCSR.S                    | 2 | 3.53 | 0.37 |       |
| IPI00830132 | Uncharacterized protein IGHG4 (Fragment)        | K.GPSVFPLAPCSRSTSESTAALGCLVK.D      | 2 | 3.65 | 0.35 |       |
| IPI00830132 | Uncharacterized protein IGHG4 (Fragment)        | K.GQPREPQVYTLPPSQEEM*TK.N           | 2 | 4.81 | 0.42 |       |
| IPI00830132 | Uncharacterized protein IGHG4 (Fragment)        | K.GQPREPQVYTLPPSQEEM*TK.N           | 3 | 3.43 | 0.19 |       |
| IPI00830132 | Uncharacterized protein IGHG4 (Fragment)        | K.GQPREPQVYTLPPSQEEM*TKNQVSLTCLVK.G | 3 | 4.44 | 0.36 |       |
| IPI00830132 | Uncharacterized protein IGHG4 (Fragment)        | K.GQPREPQVYTLPPSQEEMTK.N            | 2 | 3.38 | 0.16 |       |
| IPI00830132 | Uncharacterized protein IGHG4 (Fragment)        | K.NQVSLTCLVK.G                      | 1 | 2.26 | 0.22 |       |
| IPI00830132 | Uncharacterized protein IGHG4 (Fragment)        | K.NQVSLTCLVK.G                      | 2 | 2.44 | 0.28 | -2.15 |
| IPI00830132 | Uncharacterized protein IGHG4 (Fragment)        | K.TTPPVLDSDGSFFLYSR.L               | 1 | 3.56 | 0.43 |       |
| IPI00830132 | Uncharacterized protein IGHG4 (Fragment)        | K.TTPPVLDSDGSFFLYSR.L               | 2 | 4.22 | 0.49 |       |
| IPI00830132 | Uncharacterized protein IGHG4 (Fragment)        | K.TTPPVLDSDGSFFLYSR.L               | 3 | 4.52 | 0.37 |       |
| IPI00830132 | Uncharacterized protein IGHG4 (Fragment)        | K.VSNKGLPSSIEK.T                    | 1 | 2.12 | 0.16 |       |
| IPI00830132 | Uncharacterized protein IGHG4 (Fragment)        | K.VSNKGLPSSIEK.T                    | 2 | 3.08 | 0.16 |       |
| IPI00830132 | Uncharacterized protein IGHG4 (Fragment)        | K.WYVDGVEVHNAK.T                    | 1 | 2.91 | 0.35 |       |
| IPI00830132 | Uncharacterized protein IGHG4 (Fragment)        | K.WYVDGVEVHNAK.T                    | 2 | 3.90 | 0.46 |       |
| IPI00830132 | Uncharacterized protein IGHG4 (Fragment)        | K.WYVDGVEVHNAK.T                    | 3 | 2.99 | 0.21 |       |
| IPI00830132 | Uncharacterized protein IGHG4 (Fragment)        | R.EEM*TKNQVSLTCLVK.G                | 2 | 3.75 | 0.32 |       |
| IPI00830132 | Uncharacterized protein IGHG4 (Fragment)        | R.EPQVYTLPPSQEEM*TK.N               | 2 | 2.63 | 0.30 |       |
| IPI00830132 | Uncharacterized protein IGHG4 (Fragment)        | R.STSESTAALGCLVK.D                  | 1 | 2.94 | 0.40 |       |
| IPI00830132 | Uncharacterized protein IGHG4 (Fragment)        | R.STSESTAALGCLVK.D                  | 2 | 4.70 | 0.44 |       |
| IPI00830132 | Uncharacterized protein IGHG4 (Fragment)        | R.STSESTAALGCLVK.D                  | 3 | 3.43 | 0.20 |       |
| IPI00830132 | Uncharacterized protein IGHG4 (Fragment)        | R.VVSVLTVLHQDWLNGK.E                | 1 | 4.22 | 0.41 |       |
| IPI00830132 | Uncharacterized protein IGHG4 (Fragment)        | R.VVSVLTVLHQDWLNGK.E                | 2 | 5.39 | 0.46 |       |
| IPI00830132 | Uncharacterized protein IGHG4 (Fragment)        | R.VVSVLTVLHQDWLNGK.E                | 3 | 3.42 | 0.38 |       |
| IPI00830132 | Uncharacterized protein IGHG4 (Fragment)        | R.VVSVLTVLHQDWLNGKEYK.C             | 2 | 5.56 | 0.40 |       |
| IPI00830132 | Uncharacterized protein IGHG4 (Fragment)        | R.VVSVLTVLHQDWLNGKEYK.C             | 3 | 4.97 | 0.40 |       |
| IPI00830132 | Uncharacterized protein IGHG4 (Fragment)        | R.WQEGNVFSCSVM*HEALHNHYTQK.S        | 3 | 3.35 | 0.22 |       |
| IPI00843819 | Similar to Dual specificity protein kinase CLK2 | R.SRKQATKKPFLVKRCR.S                | 2 | 2.36 | 0.14 |       |
| IPI00843910 | Tissue alpha-L-fucosidase precursor             | F.FFHPEEWADLFQAAGAK.Y               | 2 | 4.36 | 0.49 | -4.39 |
| IPI00843910 | Tissue alpha-L-fucosidase precursor             | F.FFHPEEWADLFQAAGAK.Y               | 3 | 4.81 | 0.36 | -2.51 |
| IPI00843910 | Tissue alpha-L-fucosidase precursor             | K.DGLVPIFQER.L                      | 2 | 2.55 | 0.10 | -3.12 |
| IPI00843910 | Tissue alpha-L-fucosidase precursor             | K.DVGPHRDLVGELGTALR.K               | 2 | 2.53 | 0.17 | -2.91 |
| IPI00843910 | Tissue alpha-L-fucosidase precursor             | K.ITM*LGIQGDLK.W                    | 2 | 3.38 | 0.28 | -3.89 |
| IPI00843910 | Tissue alpha-L-fucosidase precursor             | K.TQHFVSAK.T                        | 1 | 2.29 | 0.13 | -5.39 |
| IPI00843910 | Tissue alpha-L-fucosidase precursor             | K.WSTDPDKGLFISLPQLPPSAVPAEFAWTIK.L  | 3 | 3.77 | 0.25 | -4.39 |
| IPI00843910 | Tissue alpha-L-fucosidase precursor             | K.YVVLTTK.H                         | 1 | 2.29 | 0.21 | -2.33 |
| IPI00843910 | Tissue alpha-L-fucosidase precursor             | K.YVVLTTK.H                         | 2 | 2.02 | 0.19 | -2.83 |
| IPI00843910 | Tissue alpha-L-fucosidase precursor             | R.DLVGELGTALR.K                     | 2 | 4.20 | 0.34 | -2.60 |
| IPI00843910 | Tissue alpha-L-fucosidase precursor             | R.DNYPPGFSYADFGPQFTAR.F             | 2 | 6.14 | 0.64 | -4.84 |



|             |                                              |                                         |   |      |      |       |
|-------------|----------------------------------------------|-----------------------------------------|---|------|------|-------|
| IPI00843910 | Tissue alpha-L-fucosidase precursor          | R.DNYPPGFSYADFGPQFTAR.F                 | 3 | 5.81 | 0.53 | -4.70 |
| IPI00843910 | Tissue alpha-L-fucosidase precursor          | R.FM*RDNYPPGFSYADFGPQFTAR.F             | 3 | 5.78 | 0.52 | -0.87 |
| IPI00844156 | SERPINC1 protein                             | H.LADSKNDNDNIFLSPLSISTAFAM*TK.L         | 3 | 4.76 | 0.36 | -3.54 |
| IPI00844156 | SERPINC1 protein                             | K.AFLEVNEEGSEAAASTAVVIAGR.S             | 2 | 6.93 | 0.56 | -7.77 |
| IPI00844156 | SERPINC1 protein                             | K.AFLEVNEEGSEAAASTAVVIAGR.S             | 3 | 5.58 | 0.51 | -5.54 |
| IPI00844156 | SERPINC1 protein                             | K.ANRPFLVFIR.E                          | 2 | 2.97 | 0.24 | -2.62 |
| IPI00844156 | SERPINC1 protein                             | K.ANRPFLVFIR.E                          | 3 | 3.82 | 0.14 | -4.15 |
| IPI00844156 | SERPINC1 protein                             | K.ATEDEGSEQKIPEATNR.R                   | 2 | 4.20 | 0.41 | -0.19 |
| IPI00844156 | SERPINC1 protein                             | K.ATEDEGSEQKIPEATNR.R                   | 3 | 3.07 | 0.17 | -0.22 |
| IPI00844156 | SERPINC1 protein                             | K.ATEDEGSEQKIPEATNRR.V                  | 2 | 2.31 | 0.14 | -4.94 |
| IPI00844156 | SERPINC1 protein                             | K.ATEDEGSEQKIPEATNRR.V                  | 3 | 3.64 | 0.38 | -3.92 |
| IPI00844156 | SERPINC1 protein                             | K.KATEDEGSEQKIPEATNR.R                  | 2 | 4.71 | 0.44 | -4.18 |
| IPI00844156 | SERPINC1 protein                             | K.KATEDEGSEQKIPEATNR.R                  | 3 | 3.95 | 0.22 | -4.08 |
| IPI00844156 | SERPINC1 protein                             | K.KATEDEGSEQKIPEATNR.R                  | 4 | 3.58 | 0.31 | -3.64 |
| IPI00844156 | SERPINC1 protein                             | K.KATEDEGSEQKIPEATNRR.V                 | 2 | 3.36 | 0.27 | -4.40 |
| IPI00844156 | SERPINC1 protein                             | K.KATEDEGSEQKIPEATNRR.V                 | 3 | 4.09 | 0.38 | -3.99 |
| IPI00844156 | SERPINC1 protein                             | K.KATEDEGSEQKIPEATNRR.V                 | 4 | 3.47 | 0.39 | -2.50 |
| IPI00844156 | SERPINC1 protein                             | K.LVSANRLFQDK.S                         | 2 | 2.72 | 0.34 | -3.30 |
| IPI00844156 | SERPINC1 protein                             | K.NDNDNIFLSPLSISTAFAM*TK.L              | 2 | 6.37 | 0.59 | -4.78 |
| IPI00844156 | SERPINC1 protein                             | K.NDNDNIFLSPLSISTAFAM*TK.L              | 3 | 5.71 | 0.56 | -4.04 |
| IPI00844156 | SERPINC1 protein                             | K.NDNDNIFLSPLSISTAFAMTK.L               | 2 | 4.89 | 0.45 |       |
| IPI00844156 | SERPINC1 protein                             | K.TSDQIHFFFAK.L                         | 1 | 2.99 | 0.30 | -3.49 |
| IPI00844156 | SERPINC1 protein                             | K.TSDQIHFFFAK.L                         | 2 | 3.80 | 0.43 | -4.59 |
| IPI00844156 | SERPINC1 protein                             | K.TSDQIHFFFAK.L                         | 3 | 2.28 | 0.19 | -3.19 |
| IPI00844156 | SERPINC1 protein                             | R.DIPM*NPM*CIYR.S                       | 2 | 2.00 | 0.29 | -7.71 |
| IPI00844156 | SERPINC1 protein                             | R.DIPM*NPM*CIYR.S                       | 3 | 1.82 | 0.28 | -2.61 |
| IPI00844156 | SERPINC1 protein                             | R.EVPLNTIIFM*GR.V                       | 2 | 3.83 | 0.41 | -4.57 |
| IPI00844156 | SERPINC1 protein                             | R.EVPLNTIIFMGR.V                        | 1 | 2.93 | 0.25 | -1.66 |
| IPI00844156 | SERPINC1 protein                             | R.EVPLNTIIFMGR.V                        | 2 | 3.07 | 0.49 | -4.19 |
| IPI00844156 | SERPINC1 protein                             | R.FATTFYQHLADSK.N                       | 2 | 4.15 | 0.37 | -3.74 |
| IPI00844156 | SERPINC1 protein                             | R.FATTFYQHLADSKNDNDNIFLSPLSISTAF.A      | 3 | 3.56 | 0.30 | -3.68 |
| IPI00844156 | SERPINC1 protein                             | R.FATTFYQHLADSKNDNDNIFLSPLSISTAFAM*TK.L | 3 | 6.12 | 0.58 | -5.06 |
| IPI00844156 | SERPINC1 protein                             | R.FATTFYQHLADSKNDNDNIFLSPLSISTAFAM*TK.L | 4 | 4.63 | 0.43 | -5.03 |
| IPI00844156 | SERPINC1 protein                             | R.SLNPNRVTFK.A                          | 1 | 2.17 | 0.28 | -4.99 |
| IPI00844156 | SERPINC1 protein                             | R.SLNPNRVTFK.A                          | 2 | 2.50 | 0.28 | -3.66 |
| IPI00844156 | SERPINC1 protein                             | R.SPEKKATEDEGSEQKIPEATNR.R              | 3 | 4.62 | 0.30 |       |
| IPI00844156 | SERPINC1 protein                             | R.VTFKANRPFLVFIR.E                      | 4 | 2.26 | 0.11 | -3.72 |
| IPI00844156 | SERPINC1 protein                             | T.SDQIHFFFAK.L                          | 2 | 3.26 | 0.24 | -2.59 |
| IPI00844156 | SERPINC1 protein                             | V.PLNTIIFM*GR.V                         | 2 | 3.65 | 0.36 | -3.75 |
| IPI00845229 | Isoform 2 of DEP domain-containing protein 2 | K.TSEGIPTSDNEKGERNSKR.V                 | 3 | 2.50 | 0.15 | 2.23  |
| IPI00845354 | IGKC protein                                 | K.ADYEKHKVYACEVTHQGLSSPVTK.S            | 3 | 6.20 | 0.45 |       |
| IPI00845354 | IGKC protein                                 | K.DSTYSLSLTLTSLK.A                      | 1 | 3.19 | 0.31 |       |

|             |                                         |                                            |   |      |      |       |
|-------------|-----------------------------------------|--------------------------------------------|---|------|------|-------|
| IPI00845354 | IGKC protein                            | K.DSTYLSSTLTLSK.A                          | 2 | 2.59 | 0.17 | -2.80 |
| IPI00845354 | IGKC protein                            | K.DSTYLSSTLTLSK.A                          | 3 | 3.23 | 0.27 |       |
| IPI00845354 | IGKC protein                            | K.HKYACEVTHQGLSSPVTK.S                     | 3 | 4.56 | 0.36 |       |
| IPI00845354 | IGKC protein                            | K.SGTASVVCLLNNFYPR.E                       | 1 | 4.08 | 0.39 |       |
| IPI00845354 | IGKC protein                            | K.SGTASVVCLLNNFYPR.E                       | 2 | 3.05 | 0.36 | -5.56 |
| IPI00845354 | IGKC protein                            | K.SGTASVVCLLNNFYPR.E                       | 3 | 4.63 | 0.31 |       |
| IPI00845354 | IGKC protein                            | K.VDNALQSGNSQESVTEQDSK.D                   | 2 | 5.40 | 0.58 | -3.51 |
| IPI00845354 | IGKC protein                            | K.VDNALQSGNSQESVTEQDSK.D                   | 3 | 4.56 | 0.42 | -2.63 |
| IPI00845354 | IGKC protein                            | K.VDNALQSGNSQESVTEQDSKDSTYLSSTLTLSK.A      | 2 | 3.56 | 0.49 |       |
| IPI00845354 | IGKC protein                            | K.VDNALQSGNSQESVTEQDSKDSTYLSSTLTLSK.A      | 3 | 6.26 | 0.51 |       |
| IPI00845354 | IGKC protein                            | K.VDNALQSGNSQESVTEQDSKDSTYLSSTLTLSKADYEK.H | 3 | 4.65 | 0.36 |       |
| IPI00845354 | IGKC protein                            | K.VQWKVDNALQSGNSQESVTEQDSK.D               | 2 | 5.17 | 0.41 |       |
| IPI00845354 | IGKC protein                            | K.VQWKVDNALQSGNSQESVTEQDSK.D               | 3 | 6.42 | 0.38 |       |
| IPI00845354 | IGKC protein                            | K.VQWKVDNALQSGNSQESVTEQDSKDSTYLSSTLTLSK.A  | 3 | 5.65 | 0.43 |       |
| IPI00845354 | IGKC protein                            | K.VYACEVTHQGLSSPVTK.S                      | 1 | 4.33 | 0.48 |       |
| IPI00845354 | IGKC protein                            | K.VYACEVTHQGLSSPVTK.S                      | 2 | 5.40 | 0.48 |       |
| IPI00845354 | IGKC protein                            | K.VYACEVTHQGLSSPVTK.S                      | 3 | 4.16 | 0.44 |       |
| IPI00845354 | IGKC protein                            | Q.SGNSQESVTEQDSKDSTYLSSTLTLSK.A            | 3 | 6.25 | 0.52 |       |
| IPI00845354 | IGKC protein                            | R.FSGSGSGDFTLTIR.R                         | 2 | 4.56 | 0.42 |       |
| IPI00845354 | IGKC protein                            | R.GTVAAPSVFIFPPSDEQLK.S                    | 2 | 4.79 | 0.46 |       |
| IPI00845354 | IGKC protein                            | R.GTVAAPSVFIFPPSDEQLKSGTASVVCLLNNFYPR.E    | 3 | 3.58 | 0.30 |       |
| IPI00845354 | IGKC protein                            | R.LLIYGASSR.A                              | 2 | 3.35 | 0.21 |       |
| IPI00845354 | IGKC protein                            | R.TVAAPSVF.-                               | 1 | 1.75 | 0.12 |       |
| IPI00845354 | IGKC protein                            | R.TVAAPSVFIFPPSDEQLK.S                     | 1 | 3.65 | 0.48 |       |
| IPI00845354 | IGKC protein                            | R.TVAAPSVFIFPPSDEQLK.S                     | 2 | 4.89 | 0.48 |       |
| IPI00845354 | IGKC protein                            | R.TVAAPSVFIFPPSDEQLK.S                     | 3 | 4.07 | 0.25 |       |
| IPI00845354 | IGKC protein                            | R.TVAAPSVFIFPPSDEQLKSGTASVVCLLNNFYPR.E     | 3 | 5.23 | 0.48 |       |
| IPI00845354 | IGKC protein                            | V.YACEVTHQGLSSPVTK.S                       | 2 | 5.14 | 0.43 |       |
| IPI00845508 | BAH domain and coiled-coil containing 1 | R.SEAYGTNTARQGR.A                          | 2 | 1.68 | 0.17 |       |
| IPI00847179 | apolipoprotein A-IV precursor           | A.EVSADQVATVM*WDYFSQLSNNAK.E               | 2 | 5.18 | 0.63 | -4.09 |
| IPI00847179 | apolipoprotein A-IV precursor           | A.EVSADQVATVM*WDYFSQLSNNAK.E               | 3 | 6.70 | 0.61 | -4.05 |
| IPI00847179 | apolipoprotein A-IV precursor           | A.EVSADQVATVMWDYFSQLSNNAK.E                | 2 | 5.28 | 0.57 | -2.32 |
| IPI00847179 | apolipoprotein A-IV precursor           | A.EVSADQVATVMWDYFSQLSNNAK.E                | 3 | 4.17 | 0.28 | -0.76 |
| IPI00847179 | apolipoprotein A-IV precursor           | A.KIDQNVEELKGR.L                           | 2 | 3.77 | 0.24 | -2.82 |
| IPI00847179 | apolipoprotein A-IV precursor           | D.YFSQLSNNAK.E                             | 2 | 3.18 | 0.33 | -1.38 |
| IPI00847179 | apolipoprotein A-IV precursor           | K.AKIDQNVEELK.G                            | 2 | 2.95 | 0.11 | -3.37 |
| IPI00847179 | apolipoprotein A-IV precursor           | K.AKIDQNVEELKGR.L                          | 2 | 4.21 | 0.40 | -4.06 |
| IPI00847179 | apolipoprotein A-IV precursor           | K.AKIDQNVEELKGR.L                          | 3 | 4.25 | 0.43 | -3.20 |
| IPI00847179 | apolipoprotein A-IV precursor           | K.ALVQQM*EQLR.Q                            | 2 | 3.54 | 0.24 | -3.15 |
| IPI00847179 | apolipoprotein A-IV precursor           | K.ALVQQMEQLR.Q                             | 2 | 3.06 | 0.09 | -1.29 |
| IPI00847179 | apolipoprotein A-IV precursor           | K.DLRDKVNSFFSTFK.E                         | 2 | 4.07 | 0.35 | -3.79 |
| IPI00847179 | apolipoprotein A-IV precursor           | K.DLRDKVNSFFSTFK.E                         | 3 | 3.71 | 0.28 | -3.81 |

|             |                               |                                            |   |      |      |       |
|-------------|-------------------------------|--------------------------------------------|---|------|------|-------|
| IPI00847179 | apolipoprotein A-IV precursor | K.DLRDKVNSFFSTFK.E                         | 4 | 2.40 | 0.11 | -2.99 |
| IPI00847179 | apolipoprotein A-IV precursor | K.DLRDKVNSFFSTFK.E                         | 2 | 3.99 | 0.44 | -3.65 |
| IPI00847179 | apolipoprotein A-IV precursor | K.DSEKLKEEIGKELEELR.A                      | 2 | 5.33 | 0.34 | -3.95 |
| IPI00847179 | apolipoprotein A-IV precursor | K.DSEKLKEEIGKELEELR.A                      | 3 | 4.80 | 0.39 | -2.49 |
| IPI00847179 | apolipoprotein A-IV precursor | K.DSEKLKEEIGKELEELR.A                      | 4 | 4.01 | 0.41 | -2.73 |
| IPI00847179 | apolipoprotein A-IV precursor | K.EAVEHLQK.S                               | 1 | 2.15 | 0.12 | -4.16 |
| IPI00847179 | apolipoprotein A-IV precursor | K.EAVEHLQK.S                               | 2 | 2.53 | 0.24 | -2.28 |
| IPI00847179 | apolipoprotein A-IV precursor | K.EKESQDKTLSLPELEQQQEQQQEQQQEQVQM*LAPLES.- | 3 | 5.05 | 0.47 | -1.76 |
| IPI00847179 | apolipoprotein A-IV precursor | K.EKESQDKTLSLPELEQQQEQQQEQQQEQVQM*LAPLES.- | 4 | 3.18 | 0.18 | -4.46 |
| IPI00847179 | apolipoprotein A-IV precursor | K.ESQDKTLSLPELEQQQEQQQEQQQEQVQM*LAPLES.-   | 3 | 5.13 | 0.45 | -4.02 |
| IPI00847179 | apolipoprotein A-IV precursor | K.IDQNVEELK.G                              | 1 | 2.68 | 0.15 | -4.80 |
| IPI00847179 | apolipoprotein A-IV precursor | K.IDQNVEELK.G                              | 2 | 3.15 | 0.18 | -2.93 |
| IPI00847179 | apolipoprotein A-IV precursor | K.IDQNVEELKGR.L                            | 2 | 3.91 | 0.26 | -3.45 |
| IPI00847179 | apolipoprotein A-IV precursor | K.IDQNVEELKGR.L                            | 3 | 3.30 | 0.19 | -3.94 |
| IPI00847179 | apolipoprotein A-IV precursor | K.IDQTVEELR.R                              | 2 | 2.80 | 0.15 | -1.87 |
| IPI00847179 | apolipoprotein A-IV precursor | K.IDQTVEELRR.S                             | 2 | 2.46 | 0.10 | -2.07 |
| IPI00847179 | apolipoprotein A-IV precursor | K.IGDNLRELQQR.L                            | 3 | 1.90 | 0.10 | -1.75 |
| IPI00847179 | apolipoprotein A-IV precursor | K.KLVPFATELHER.L                           | 2 | 3.25 | 0.34 | -4.46 |
| IPI00847179 | apolipoprotein A-IV precursor | K.KLVPFATELHER.L                           | 3 | 4.22 | 0.40 | -3.89 |
| IPI00847179 | apolipoprotein A-IV precursor | K.LGEVNTYAGDLQK.K                          | 1 | 3.35 | 0.42 | -2.75 |
| IPI00847179 | apolipoprotein A-IV precursor | K.LGEVNTYAGDLQK.K                          | 2 | 4.45 | 0.46 | -3.68 |
| IPI00847179 | apolipoprotein A-IV precursor | K.LGEVNTYAGDLQKK.L                         | 2 | 3.34 | 0.30 | -2.41 |
| IPI00847179 | apolipoprotein A-IV precursor | K.LGEVNTYAGDLQKK.L                         | 3 | 2.66 | 0.19 | -0.32 |
| IPI00847179 | apolipoprotein A-IV precursor | K.LGPHAGDVEGHLSFLEK.D                      | 2 | 5.19 | 0.45 | -6.99 |
| IPI00847179 | apolipoprotein A-IV precursor | K.LGPHAGDVEGHLSFLEK.D                      | 3 | 5.05 | 0.46 | -6.78 |
| IPI00847179 | apolipoprotein A-IV precursor | K.LGPHAGDVEGHLSFLEK.D                      | 4 | 4.24 | 0.47 | -5.57 |
| IPI00847179 | apolipoprotein A-IV precursor | K.LGPHAGDVEGHLSFLEKDLR.D                   | 2 | 5.88 | 0.54 | -4.39 |
| IPI00847179 | apolipoprotein A-IV precursor | K.LGPHAGDVEGHLSFLEKDLR.D                   | 3 | 4.00 | 0.41 | -3.61 |
| IPI00847179 | apolipoprotein A-IV precursor | K.LGPHAGDVEGHLSFLEKDLR.D                   | 4 | 3.42 | 0.33 | -2.28 |
| IPI00847179 | apolipoprotein A-IV precursor | K.LKEEIGKELEELR.A                          | 2 | 4.46 | 0.37 | -3.55 |
| IPI00847179 | apolipoprotein A-IV precursor | K.LKEEIGKELEELR.A                          | 3 | 4.80 | 0.44 | -2.42 |
| IPI00847179 | apolipoprotein A-IV precursor | K.LNHQLEGLTFQM*K.K                         | 2 | 4.02 | 0.32 | -4.33 |
| IPI00847179 | apolipoprotein A-IV precursor | K.LNHQLEGLTFQM*K.K                         | 3 | 3.90 | 0.31 | -3.13 |
| IPI00847179 | apolipoprotein A-IV precursor | K.LVPFATELHER.L                            | 2 | 2.83 | 0.49 | -3.94 |
| IPI00847179 | apolipoprotein A-IV precursor | K.NAEELKAR.I                               | 1 | 2.00 | 0.06 | -4.41 |
| IPI00847179 | apolipoprotein A-IV precursor | K.NAEELKAR.I                               | 2 | 2.85 | 0.12 | -2.95 |
| IPI00847179 | apolipoprotein A-IV precursor | K.SELTQQLNALFQDK.L                         | 1 | 3.86 | 0.43 | -4.16 |
| IPI00847179 | apolipoprotein A-IV precursor | K.SELTQQLNALFQDK.L                         | 2 | 5.38 | 0.38 | -5.02 |
| IPI00847179 | apolipoprotein A-IV precursor | K.SELTQQLNALFQDK.L                         | 3 | 4.62 | 0.45 | -3.25 |
| IPI00847179 | apolipoprotein A-IV precursor | K.SELTQQLNALFQDKLGEVNTYAGDLQK.K            | 2 | 5.07 | 0.59 | -2.50 |
| IPI00847179 | apolipoprotein A-IV precursor | K.SELTQQLNALFQDKLGEVNTYAGDLQK.K            | 3 | 6.61 | 0.63 | -5.14 |
| IPI00847179 | apolipoprotein A-IV precursor | K.SELTQQLNALFQDKLGEVNTYAGDLQK.K            | 4 | 5.12 | 0.44 | -3.50 |

|             |                               |                              |   |      |      |       |
|-------------|-------------------------------|------------------------------|---|------|------|-------|
| IPI00847179 | apolipoprotein A-IV precursor | K.SLAELGGHLDQQVEEFR.R        | 2 | 5.67 | 0.51 | -8.42 |
| IPI00847179 | apolipoprotein A-IV precursor | K.SLAELGGHLDQQVEEFR.R        | 3 | 5.92 | 0.50 | -4.30 |
| IPI00847179 | apolipoprotein A-IV precursor | K.SLAELGGHLDQQVEEFR.R        | 2 | 4.43 | 0.35 | -5.16 |
| IPI00847179 | apolipoprotein A-IV precursor | K.SLAELGGHLDQQVEEFR.R        | 3 | 4.55 | 0.41 | -5.23 |
| IPI00847179 | apolipoprotein A-IV precursor | K.SLAELGGHLDQQVEEFR.R        | 4 | 1.74 | 0.17 | -2.65 |
| IPI00847179 | apolipoprotein A-IV precursor | K.VKIDQTV EELRR.S            | 2 | 2.91 | 0.15 | -3.70 |
| IPI00847179 | apolipoprotein A-IV precursor | K.VKIDQTV EELRR.S            | 3 | 2.36 | 0.14 | -1.79 |
| IPI00847179 | apolipoprotein A-IV precursor | K.VNSFFSTFK.E                | 1 | 1.91 | 0.15 | -3.24 |
| IPI00847179 | apolipoprotein A-IV precursor | K.VNSFFSTFK.E                | 2 | 2.75 | 0.39 | -1.57 |
| IPI00847179 | apolipoprotein A-IV precursor | L.AELGGHLDQQVEEFR.R          | 2 | 3.91 | 0.26 | 0.99  |
| IPI00847179 | apolipoprotein A-IV precursor | L.APYAQDTQEKLNHQLEGLTFQM*K.K | 3 | 3.92 | 0.47 | -4.42 |
| IPI00847179 | apolipoprotein A-IV precursor | L.LPHANEVSQK.I               | 1 | 2.12 | 0.30 | -3.98 |
| IPI00847179 | apolipoprotein A-IV precursor | R.DKVNSFFSTFK.E              | 1 | 3.20 | 0.37 | -1.59 |
| IPI00847179 | apolipoprotein A-IV precursor | R.DKVNSFFSTFK.E              | 2 | 3.46 | 0.33 | -2.96 |
| IPI00847179 | apolipoprotein A-IV precursor | R.DKVNSFFSTFK.E              | 3 | 2.62 | 0.09 | -2.89 |
| IPI00847179 | apolipoprotein A-IV precursor | R.DKVNSFFSTFKEK.E            | 2 | 4.68 | 0.34 | -2.14 |
| IPI00847179 | apolipoprotein A-IV precursor | R.DKVNSFFSTFKEK.E            | 3 | 3.48 | 0.44 | -1.26 |
| IPI00847179 | apolipoprotein A-IV precursor | R.DKVNSFFSTFKEKESQDK.T       | 3 | 2.45 | 0.14 | -3.94 |
| IPI00847179 | apolipoprotein A-IV precursor | R.ENADSLQASLRPHADELK.A       | 2 | 3.23 | 0.24 | -4.63 |
| IPI00847179 | apolipoprotein A-IV precursor | R.ENADSLQASLRPHADELK.A       | 3 | 2.62 | 0.21 | -2.95 |
| IPI00847179 | apolipoprotein A-IV precursor | R.ENADSLQASLRPHADELKAK.I     | 3 | 3.53 | 0.38 | -2.09 |
| IPI00847179 | apolipoprotein A-IV precursor | R.GNLRGNT EGLQK.S            | 2 | 2.86 | 0.21 | -2.92 |
| IPI00847179 | apolipoprotein A-IV precursor | R.GNLRGNT EGLQK.S            | 3 | 2.80 | 0.42 | -3.25 |
| IPI00847179 | apolipoprotein A-IV precursor | R.ISASAEELR.Q                | 1 | 2.28 | 0.06 | -1.84 |
| IPI00847179 | apolipoprotein A-IV precursor | R.ISASAEELR.Q                | 2 | 3.74 | 0.30 | -1.75 |
| IPI00847179 | apolipoprotein A-IV precursor | R.ISASAEELRQR.L              | 2 | 2.66 | 0.07 | -3.51 |
| IPI00847179 | apolipoprotein A-IV precursor | R.LAKDSEKLKEEIGKELEELR.A     | 3 | 4.01 | 0.43 | -4.47 |
| IPI00847179 | apolipoprotein A-IV precursor | R.LAKDSEKLKEEIGKELEELR.A     | 4 | 4.38 | 0.37 | -4.67 |
| IPI00847179 | apolipoprotein A-IV precursor | R.LAPLAEDVR.G                | 1 | 1.83 | 0.07 | -3.95 |
| IPI00847179 | apolipoprotein A-IV precursor | R.LAPLAEDVR.G                | 2 | 2.44 | 0.14 | -2.78 |
| IPI00847179 | apolipoprotein A-IV precursor | R.LEPYADQLR.T                | 1 | 2.24 | 0.08 | -3.56 |
| IPI00847179 | apolipoprotein A-IV precursor | R.LEPYADQLR.T                | 2 | 2.14 | 0.18 | -3.19 |
| IPI00847179 | apolipoprotein A-IV precursor | R.LLPHANEVSQK.I              | 1 | 2.80 | 0.18 | -3.97 |
| IPI00847179 | apolipoprotein A-IV precursor | R.LLPHANEVSQK.I              | 2 | 2.44 | 0.35 | -3.52 |
| IPI00847179 | apolipoprotein A-IV precursor | R.LTPYADEFK.V                | 1 | 1.83 | 0.25 | -3.56 |
| IPI00847179 | apolipoprotein A-IV precursor | R.LTPYADEFK.V                | 2 | 1.98 | 0.31 | -2.48 |
| IPI00847179 | apolipoprotein A-IV precursor | R.LTPYADEFKVK.I              | 2 | 2.06 | 0.33 | -1.89 |
| IPI00847179 | apolipoprotein A-IV precursor | R.QKLGPHAGDVEGHLSFLEK.D      | 2 | 2.19 | 0.30 | -2.46 |
| IPI00847179 | apolipoprotein A-IV precursor | R.QLTPYAQR.M                 | 2 | 1.57 | 0.09 | -2.18 |
| IPI00847179 | apolipoprotein A-IV precursor | R.RQLTPYAQR.M                | 2 | 2.87 | 0.11 | -2.48 |
| IPI00847179 | apolipoprotein A-IV precursor | R.RVEPYGENFNK.A              | 1 | 2.62 | 0.36 | -3.03 |
| IPI00847179 | apolipoprotein A-IV precursor | R.RVEPYGENFNK.A              | 2 | 3.74 | 0.28 | -4.12 |

|             |                                                      |                                        |   |      |      |       |
|-------------|------------------------------------------------------|----------------------------------------|---|------|------|-------|
| IPI00847179 | apolipoprotein A-IV precursor                        | R.RVEPYGENFNK.A                        | 3 | 3.47 | 0.34 | -2.74 |
| IPI00847179 | apolipoprotein A-IV precursor                        | R.SLAPYAQDTQEK.L                       | 1 | 2.78 | 0.35 | -3.17 |
| IPI00847179 | apolipoprotein A-IV precursor                        | R.SLAPYAQDTQEK.L                       | 2 | 3.51 | 0.45 | -3.51 |
| IPI00847179 | apolipoprotein A-IV precursor                        | R.SLAPYAQDTQEKLNHQLEGLTFQM*K.K         | 2 | 3.15 | 0.31 | -3.76 |
| IPI00847179 | apolipoprotein A-IV precursor                        | R.SLAPYAQDTQEKLNHQLEGLTFQM*K.K         | 3 | 4.29 | 0.47 | -3.95 |
| IPI00847179 | apolipoprotein A-IV precursor                        | R.TQVSTQAEQLR.R                        | 2 | 3.23 | 0.26 | -3.50 |
| IPI00847179 | apolipoprotein A-IV precursor                        | R.TQVSTQAEQLRR.Q                       | 2 | 2.63 | 0.27 | -3.28 |
| IPI00847179 | apolipoprotein A-IV precursor                        | R.VEPYGENFNK.A                         | 1 | 2.20 | 0.18 | -3.90 |
| IPI00847179 | apolipoprotein A-IV precursor                        | R.VEPYGENFNK.A                         | 2 | 2.19 | 0.24 | -3.50 |
| IPI00847179 | apolipoprotein A-IV precursor                        | R.VLRENADSLQASLRPHADELK.A              | 2 | 3.44 | 0.24 | -4.31 |
| IPI00847179 | apolipoprotein A-IV precursor                        | R.VLRENADSLQASLRPHADELK.A              | 3 | 3.64 | 0.25 | -4.09 |
| IPI00847179 | apolipoprotein A-IV precursor                        | R.VLRENADSLQASLRPHADELK.A              | 4 | 3.43 | 0.31 | -1.88 |
| IPI00847179 | apolipoprotein A-IV precursor                        | R.VLRENADSLQASLRPHADELK.A              | 5 | 3.77 | 0.35 | -3.36 |
| IPI00847179 | apolipoprotein A-IV precursor                        | V.LRENADSLQASLRPHADELK.A               | 3 | 3.62 | 0.21 | -3.34 |
| IPI00847179 | apolipoprotein A-IV precursor                        | V.PFATELHER.L                          | 2 | 2.90 | 0.18 | -2.61 |
| IPI00847179 | apolipoprotein A-IV precursor                        | W.DYFSQLSNNAK.E                        | 2 | 3.37 | 0.28 | -3.10 |
| IPI00847335 | FLJ45422 protein                                     | R.FIAVGYVDDTEFVR.F                     | 2 | 3.77 | 0.07 |       |
| IPI00847652 | CDNA FLJ46805 fis, clone TRACH3033535                | A.LELLDFSDIQVNAEFDGLASSVR.G            | 3 | 3.90 | 0.16 | 3.18  |
| IPI00847652 | CDNA FLJ46805 fis, clone TRACH3033535                | K.SSSIHDVDLSENQLGVAGAALCAALTVNQAMRKM.Q | 3 | 4.19 | 0.10 | -2.85 |
| IPI00847670 | Similar to Phosphoglycerate mutase 1                 | K.AM*EAVAAQGK.A                        | 2 | 2.35 | 0.13 | -1.51 |
| IPI00847670 | Similar to Phosphoglycerate mutase 1                 | K.AM*EAVAAQGKA.K                       | 1 | 2.15 | 0.23 | -2.22 |
| IPI00847670 | Similar to Phosphoglycerate mutase 1                 | K.AM*EAVAAQGKA.K                       | 2 | 3.45 | 0.34 | -1.27 |
| IPI00847670 | Similar to Phosphoglycerate mutase 1                 | R.KAM*EAVAAQGKA.K                      | 2 | 3.11 | 0.29 | -0.79 |
| IPI00847670 | Similar to Phosphoglycerate mutase 1                 | R.VLIAAHGNSLR.G                        | 1 | 2.78 | 0.36 | -0.32 |
| IPI00847670 | Similar to Phosphoglycerate mutase 1                 | R.VLIAAHGNSLR.G                        | 2 | 3.18 | 0.32 | -2.03 |
| IPI00847723 | Similar to VH4 heavy chain variable region precursor | N.LTSVTAADTAVYYCAR.N                   | 2 | 5.22 | 0.22 |       |
| IPI00847759 | DENN domain-containing protein 4B                    | D.SNLNTTCPCACPFVPLLSVQTLDSRPSVSPK.S    | 3 | 4.33 | 0.26 | -7.51 |
| IPI00852577 | IGLC1 protein                                        | K.ADGSPVKAGVETTKPSK.Q                  | 2 | 3.18 | 0.20 |       |
| IPI00852577 | IGLC1 protein                                        | K.ADGSPVKAGVETTKPSK.Q                  | 3 | 3.41 | 0.23 |       |
| IPI00852577 | IGLC1 protein                                        | K.AGVETTKPSK.Q                         | 2 | 2.24 | 0.11 | -2.24 |
| IPI00852577 | IGLC1 protein                                        | K.ANPTVTLFPPSSEELQANK.A                | 2 | 4.70 | 0.37 |       |
| IPI00852577 | IGLC1 protein                                        | K.ATLVCLISDFYPGAVTVAWK.A               | 2 | 5.07 | 0.50 |       |
| IPI00852577 | IGLC1 protein                                        | K.ATLVCLISDFYPGAVTVAWK.A               | 3 | 3.53 | 0.31 | -3.63 |
| IPI00852577 | IGLC1 protein                                        | K.QSNNKYAASSYLSLTPEQWK.S               | 2 | 5.38 | 0.37 |       |
| IPI00852577 | IGLC1 protein                                        | K.QSNNKYAASSYLSLTPEQWK.S               | 3 | 4.26 | 0.33 |       |
| IPI00852577 | IGLC1 protein                                        | K.VTVLGQPK.A                           | 1 | 2.16 | 0.20 |       |
| IPI00852577 | IGLC1 protein                                        | K.VTVLGQPK.A                           | 2 | 2.72 | 0.15 |       |
| IPI00852577 | IGLC1 protein                                        | K.YAASSYLSLTPEQWK.S                    | 1 | 3.49 | 0.43 |       |
| IPI00852577 | IGLC1 protein                                        | K.YAASSYLSLTPEQWK.S                    | 2 | 5.52 | 0.47 |       |
| IPI00852577 | IGLC1 protein                                        | K.YAASSYLSLTPEQWK.S                    | 3 | 3.44 | 0.22 |       |
| IPI00852577 | IGLC1 protein                                        | R.SYSCQVTHEGSTVEK.T                    | 1 | 3.84 | 0.43 |       |

|             |                                                                   |                                       |   |      |      |       |
|-------------|-------------------------------------------------------------------|---------------------------------------|---|------|------|-------|
| IPI00852577 | IGLC1 protein                                                     | R.SYSCQVTHEGSTVEK.T                   | 2 | 3.17 | 0.41 | -4.10 |
| IPI00852577 | IGLC1 protein                                                     | R.SYSCQVTHEGSTVEKTVAPTECS.-           | 2 | 5.35 | 0.45 |       |
| IPI00852577 | IGLC1 protein                                                     | R.SYSCQVTHEGSTVEKTVAPTECS.-           | 3 | 2.78 | 0.26 |       |
| IPI00852633 | 16 kDa protein                                                    | -.M*ASTAAVHVRPDPVQAHSRGR.W            | 3 | 2.34 | 0.08 | -3.43 |
| IPI00852725 | Isoform 7 of Prolactin receptor precursor                         | D.HGYWSAWSPATFIQIPSGDPLM*LGASHYKNLK.S | 3 | 3.63 | 0.16 | -6.68 |
| IPI00852758 | Similar to Ankyrin repeat domain-containing protein 26. Isoform 2 | K.EMKQMHPNGEAKESQSIGKQNSSEER.I        | 3 | 3.83 | 0.24 |       |
| IPI00852979 | hypothetical protein LOC25758                                     | K.DSVTAILGK.N                         | 2 | 2.74 | 0.20 | -1.21 |
| IPI00852979 | hypothetical protein LOC25758                                     | K.FAQM*EQR.L                          | 2 | 2.66 | 0.17 |       |
| IPI00852979 | hypothetical protein LOC25758                                     | K.NTETATHEAEPPLFQTAESGAIEM*TSR.K      | 3 | 4.48 | 0.46 | -3.23 |
| IPI00852979 | hypothetical protein LOC25758                                     | K.SPPALSALVAK.G                       | 2 | 2.23 | 0.24 | -1.87 |
| IPI00852979 | hypothetical protein LOC25758                                     | K.SSSM*TTLAK.N                        | 2 | 2.64 | 0.24 | -2.53 |
| IPI00852979 | hypothetical protein LOC25758                                     | K.VPNLLSTSWTFPR.W                     | 2 | 3.84 | 0.44 | -3.39 |
| IPI00852979 | hypothetical protein LOC25758                                     | R.DFQTAEVAYYSPTTR.H                   | 2 | 3.94 | 0.33 | -3.74 |
| IPI00852979 | hypothetical protein LOC25758                                     | R.DFQTAEVAYYSPTTR.H                   | 3 | 5.00 | 0.27 | -2.65 |
| IPI00852979 | hypothetical protein LOC25758                                     | R.DVAQDGSTIK.T                        | 2 | 2.64 | 0.24 | -2.54 |
| IPI00852979 | hypothetical protein LOC25758                                     | R.LPPLRAENTDAVLPAASAA.V               | 2 | 3.29 | 0.40 | -0.92 |
| IPI00852979 | hypothetical protein LOC25758                                     | R.SPQNVN*AQQK.V                       | 2 | 2.33 | 0.20 | -1.67 |
| IPI00852979 | hypothetical protein LOC25758                                     | R.VHNGVSLPTFK.N                       | 2 | 2.46 | 0.24 | -3.35 |
| IPI00852979 | hypothetical protein LOC25758                                     | S.DGTDGSEISSDINSSPER.N                | 2 | 5.29 | 0.53 | -1.31 |
| IPI00853045 | Anti-RhD monoclonal T125 kappa light chain precursor              | K.ADYEKHKVYACEVTHQGLSSPVTK.S          | 3 | 6.20 | 0.45 |       |
| IPI00853045 | Anti-RhD monoclonal T125 kappa light chain precursor              | K.DSTYLSSTLTLSK.A                     | 1 | 3.19 | 0.31 |       |
| IPI00853045 | Anti-RhD monoclonal T125 kappa light chain precursor              | K.DSTYLSSTLTLSK.A                     | 2 | 2.59 | 0.17 | -2.80 |
| IPI00853045 | Anti-RhD monoclonal T125 kappa light chain precursor              | K.DSTYLSSTLTLSK.A                     | 3 | 3.23 | 0.27 |       |
| IPI00853045 | Anti-RhD monoclonal T125 kappa light chain precursor              | K.HKVYACEVTHQGLSSPVTK.S               | 3 | 4.56 | 0.36 |       |
| IPI00853045 | Anti-RhD monoclonal T125 kappa light chain precursor              | K.RTVAAPSVFIFPPSDEQLK.S               | 2 | 5.74 | 0.42 |       |
| IPI00853045 | Anti-RhD monoclonal T125 kappa light chain precursor              | K.RTVAAPSVFIFPPSDEQLK.S               | 3 | 4.14 | 0.22 |       |
| IPI00853045 | Anti-RhD monoclonal T125 kappa light chain precursor              | K.SGTASVVCLLNIFYPR.E                  | 1 | 4.08 | 0.39 |       |
| IPI00853045 | Anti-RhD monoclonal T125 kappa light chain precursor              | K.SGTASVVCLLNIFYPR.E                  | 2 | 3.05 | 0.36 | -5.56 |
| IPI00853045 | Anti-RhD monoclonal T125 kappa light chain precursor              | K.SGTASVVCLLNIFYPR.E                  | 3 | 4.63 | 0.31 |       |
| IPI00853045 | Anti-RhD monoclonal T125 kappa light chain precursor              | K.VDNALQSGNSQESVTEQDSK.D              | 2 | 5.40 | 0.58 | -3.51 |

|             |                                                      |                                            |   |      |      |       |
|-------------|------------------------------------------------------|--------------------------------------------|---|------|------|-------|
| IPI00853045 | Anti-RhD monoclonal T125 kappa light chain precursor | K.VDNALQSGNSQESVTEQDSK.D                   | 3 | 4.56 | 0.42 | -2.63 |
| IPI00853045 | Anti-RhD monoclonal T125 kappa light chain precursor | K.VDNALQSGNSQESVTEQDSKDSTYLSSTLTLSK.A      | 2 | 3.56 | 0.49 |       |
| IPI00853045 | Anti-RhD monoclonal T125 kappa light chain precursor | K.VDNALQSGNSQESVTEQDSKDSTYLSSTLTLSK.A      | 3 | 6.26 | 0.51 |       |
| IPI00853045 | Anti-RhD monoclonal T125 kappa light chain precursor | K.VDNALQSGNSQESVTEQDSKDSTYLSSTLTLSKADYEK.H | 3 | 4.65 | 0.36 |       |
| IPI00853045 | Anti-RhD monoclonal T125 kappa light chain precursor | K.VQWKVDNALQSGNSQESVTEQDSK.D               | 2 | 5.17 | 0.41 |       |
| IPI00853045 | Anti-RhD monoclonal T125 kappa light chain precursor | K.VQWKVDNALQSGNSQESVTEQDSK.D               | 3 | 6.42 | 0.38 |       |
| IPI00853045 | Anti-RhD monoclonal T125 kappa light chain precursor | K.VQWKVDNALQSGNSQESVTEQDSKDSTYLSSTLTLSK.A  | 3 | 5.65 | 0.43 |       |
| IPI00853045 | Anti-RhD monoclonal T125 kappa light chain precursor | K.VYACEVTHQGLSSPVTK.S                      | 1 | 4.33 | 0.48 |       |
| IPI00853045 | Anti-RhD monoclonal T125 kappa light chain precursor | K.VYACEVTHQGLSSPVTK.S                      | 2 | 5.40 | 0.48 |       |
| IPI00853045 | Anti-RhD monoclonal T125 kappa light chain precursor | K.VYACEVTHQGLSSPVTK.S                      | 3 | 4.16 | 0.44 |       |
| IPI00853045 | Anti-RhD monoclonal T125 kappa light chain precursor | Q.SGNSQESVTEQDSKDSTYLSSTLTLSK.A            | 3 | 6.25 | 0.52 |       |
| IPI00853045 | Anti-RhD monoclonal T125 kappa light chain precursor | R.TVAAPSVF.-                               | 1 | 1.75 | 0.12 |       |
| IPI00853045 | Anti-RhD monoclonal T125 kappa light chain precursor | R.TVAAPSVFIFPPSDEQLK.S                     | 1 | 3.65 | 0.48 |       |
| IPI00853045 | Anti-RhD monoclonal T125 kappa light chain precursor | R.TVAAPSVFIFPPSDEQLK.S                     | 2 | 4.89 | 0.48 |       |
| IPI00853045 | Anti-RhD monoclonal T125 kappa light chain precursor | R.TVAAPSVFIFPPSDEQLK.S                     | 3 | 4.07 | 0.25 |       |
| IPI00853045 | Anti-RhD monoclonal T125 kappa light chain precursor | R.TVAAPSVFIFPPSDEQLKSGTASVCLNNFYPR.E       | 3 | 5.23 | 0.48 |       |
| IPI00853045 | Anti-RhD monoclonal T125 kappa light chain precursor | V.YACEVTHQGLSSPVTK.S                       | 2 | 5.14 | 0.43 |       |
| IPI00853073 | Protein                                              | K.QEPGENSEILPTLK.Y                         | 2 | 2.34 | 0.13 | -3.72 |
| IPI00853312 | Uncharacterized protein ENSP00000324580              | K.AISSYSSTGGLPERK.R                        | 2 | 1.63 | 0.18 |       |
| IPI00853369 | Plexin-B2 precursor                                  | K.AGYLSTNTQQFVAAFEDGPYVFFVFNQQDKHPAR.N     | 4 | 3.78 | 0.35 | -3.75 |
| IPI00853369 | Plexin-B2 precursor                                  | K.AM*TLQEAEAFVGAER.C                       | 2 | 5.18 | 0.44 | -4.31 |
| IPI00853369 | Plexin-B2 precursor                                  | K.ELNHLAVDEASGVVYLGAVNALYQLDAK.L           | 3 | 4.66 | 0.36 | -4.06 |
| IPI00853369 | Plexin-B2 precursor                                  | K.FGAQLQCVTGPQATR.G                        | 2 | 4.58 | 0.45 | -2.01 |
| IPI00853369 | Plexin-B2 precursor                                  | K.FM*EPVTM*QESGTFADR.T                     | 2 | 5.00 | 0.58 | -1.49 |
| IPI00853369 | Plexin-B2 precursor                                  | K.GNGPHDNGIIVSTR.L                         | 2 | 3.36 | 0.21 | -3.30 |

|             |                                       |                                          |   |      |      |       |
|-------------|---------------------------------------|------------------------------------------|---|------|------|-------|
| IPI00853369 | Plexin-B2 precursor                   | K.GSSLHVGSDLLK.F                         | 2 | 3.31 | 0.41 | -2.85 |
| IPI00853369 | Plexin-B2 precursor                   | K.LLQLEQQVATGPALDNK.K                    | 2 | 5.73 | 0.48 | -3.57 |
| IPI00853369 | Plexin-B2 precursor                   | K.LLQLEQQVATGPALDNKK.C                   | 2 | 5.02 | 0.47 | -2.76 |
| IPI00853369 | Plexin-B2 precursor                   | K.LLQLEQQVATGPALDNKK.C                   | 3 | 3.97 | 0.43 | -1.88 |
| IPI00853369 | Plexin-B2 precursor                   | K.SFVASNDEGVATVGLVSSTGPGGDR.V            | 2 | 5.66 | 0.59 | -7.90 |
| IPI00853369 | Plexin-B2 precursor                   | K.SFVASNDEGVATVGLVSSTGPGGDR.V            | 3 | 2.68 | 0.18 | -2.91 |
| IPI00853369 | Plexin-B2 precursor                   | K.TLTETDLYCEPPEVQPPPK.R                  | 2 | 4.18 | 0.50 | -6.27 |
| IPI00853369 | Plexin-B2 precursor                   | K.TLTETDLYCEPPEVQPPPK.R                  | 3 | 3.99 | 0.44 | -4.89 |
| IPI00853369 | Plexin-B2 precursor                   | K.TLTETDLYCEPPEVQPPPK.R                  | 3 | 2.48 | 0.20 | -0.98 |
| IPI00853369 | Plexin-B2 precursor                   | K.VYLTPDGTSEYDSILVEINKR.V                | 2 | 4.50 | 0.55 | -3.97 |
| IPI00853369 | Plexin-B2 precursor                   | R.AANPDYR.C                              | 2 | 1.83 | 0.15 | -4.31 |
| IPI00853369 | Plexin-B2 precursor                   | R.AEEASHWLWSR.S                          | 3 | 2.77 | 0.39 | -2.39 |
| IPI00853369 | Plexin-B2 precursor                   | R.DLVLSGDLGSLYAM*TQDKVFR.L               | 3 | 2.75 | 0.30 | -2.23 |
| IPI00853369 | Plexin-B2 precursor                   | R.EAFEAYTDHATYK.A                        | 2 | 3.81 | 0.48 | -1.76 |
| IPI00853369 | Plexin-B2 precursor                   | R.EASPNPEDGIVR.A                         | 2 | 2.38 | 0.32 | -2.00 |
| IPI00853369 | Plexin-B2 precursor                   | R.GNIFLTSYQYPFYDCR.Q                     | 2 | 5.11 | 0.56 | -2.23 |
| IPI00853369 | Plexin-B2 precursor                   | R.IQPETGPLGGGIR.I                        | 2 | 2.90 | 0.43 | -2.42 |
| IPI00853369 | Plexin-B2 precursor                   | R.IVCVIEAAETPFTGGVEVDVFGK.L              | 3 | 3.14 | 0.26 | -2.89 |
| IPI00853369 | Plexin-B2 precursor                   | R.LPVQECLSYPTCTQCR.D                     | 2 | 5.06 | 0.44 | -5.92 |
| IPI00853369 | Plexin-B2 precursor                   | R.LVECGSLFK.G                            | 1 | 1.92 | 0.23 | -1.85 |
| IPI00853369 | Plexin-B2 precursor                   | R.LVECGSLFK.G                            | 2 | 2.73 | 0.20 | -2.02 |
| IPI00853369 | Plexin-B2 precursor                   | R.SEKLNHLAVDEASGVVYLGAVNALYQLDAK.L       | 4 | 3.47 | 0.27 | -2.70 |
| IPI00853369 | Plexin-B2 precursor                   | R.SPPNVQFTFQQPK.P                        | 2 | 3.69 | 0.45 | -3.33 |
| IPI00853369 | Plexin-B2 precursor                   | R.VLFVKGKNGPHDNGIIVSTR.L                 | 3 | 2.61 | 0.29 | -3.11 |
| IPI00853369 | Plexin-B2 precursor                   | R.VLFVKGKNGPHDNGIIVSTR.L                 | 4 | 2.81 | 0.20 | -2.03 |
| IPI00853369 | Plexin-B2 precursor                   | R.VLYAVFSR.D                             | 1 | 1.87 | 0.17 | -2.41 |
| IPI00853369 | Plexin-B2 precursor                   | R.VLYAVFSR.D                             | 2 | 2.80 | 0.27 | -1.97 |
| IPI00853369 | Plexin-B2 precursor                   | R.WTCQWDLR.Y                             | 2 | 2.40 | 0.07 | -2.35 |
| IPI00853376 | additional sex combs like 3           | K.SHVDTEKPYPASIPELASTEMIKVKNHNSVLQRTEK.K | 4 | 2.50 | 0.29 | -3.58 |
| IPI00853400 | Isoform 1 of FK506-binding protein 15 | R.M*AVSKVADK.M                           | 2 | 2.96 | 0.12 |       |
| IPI00853454 | 200 kDa protein                       | K.AM*DLDQDVLSALAEVEQLSK.M                | 2 | 6.91 | 0.39 | -3.49 |
| IPI00853454 | 200 kDa protein                       | K.AM*DLDQDVLSALAEVEQLSK.M                | 3 | 4.79 | 0.39 | -3.34 |
| IPI00853454 | 200 kDa protein                       | K.DVTEM*M*AQVEVK.L                       | 2 | 2.65 | 0.22 | -2.50 |
| IPI00853454 | 200 kDa protein                       | K.EALEEAEKAQVAEK.A                       | 3 | 2.32 | 0.09 | -0.77 |
| IPI00853454 | 200 kDa protein                       | K.ELDSLQTEAESLDNTVKELAEQLEFIK.N          | 3 | 5.86 | 0.53 | -3.38 |
| IPI00853454 | 200 kDa protein                       | K.LHTLGDNLLDSR.M                         | 2 | 2.42 | 0.26 | -6.09 |
| IPI00853454 | 200 kDa protein                       | K.M*DKSNEELR.N                           | 2 | 2.27 | 0.08 | -3.11 |
| IPI00853454 | 200 kDa protein                       | K.NIGNLFEEAEK.L                          | 2 | 2.44 | 0.18 | -3.02 |
| IPI00853454 | 200 kDa protein                       | K.TFRPAAM*LIER.S                         | 3 | 3.41 | 0.21 | -1.01 |
| IPI00853454 | 200 kDa protein                       | K.TLDGELDEK.Y                            | 2 | 2.12 | 0.16 | -2.63 |
| IPI00853454 | 200 kDa protein                       | K.TLDGELDEKYK.K                          | 2 | 2.63 | 0.20 | -0.68 |
| IPI00853454 | 200 kDa protein                       | K.TLLAQANSK.L                            | 1 | 2.24 | 0.20 | -1.94 |



|             |                                  |                                               |   |      |      |       |
|-------------|----------------------------------|-----------------------------------------------|---|------|------|-------|
| IPI00853454 | 200 kDa protein                  | K.TLLAQANSK.L                                 | 2 | 2.59 | 0.19 | -0.42 |
| IPI00853454 | 200 kDa protein                  | K.VSEIKDILAQSPAAPLKNIGNLFEEAEK.L              | 3 | 3.14 | 0.22 | -2.21 |
| IPI00853454 | 200 kDa protein                  | R.ALDPAFKIEDPYSPR.I                           | 3 | 3.29 | 0.29 | -1.24 |
| IPI00853454 | 200 kDa protein                  | R.IPSWTGAGFVR.V                               | 2 | 3.21 | 0.36 | -3.15 |
| IPI00853454 | 200 kDa protein                  | R.KAAQNSGEAEYIEK.V                            | 2 | 4.17 | 0.31 | -3.16 |
| IPI00853454 | 200 kDa protein                  | R.KVSEIKDILAQSPAAPLKN                         | 3 | 4.11 | 0.36 | -3.96 |
| IPI00853454 | 200 kDa protein                  | R.KVSEIKDILAQSPAAPLKNIGNLFEEAEK.L             | 5 | 3.34 | 0.26 | -2.58 |
| IPI00853454 | 200 kDa protein                  | R.LLDELAKG.L                                  | 2 | 2.56 | 0.06 | -2.55 |
| IPI00853454 | 200 kDa protein                  | R.NFLTQDSADLDSIEAVANEVLK.M                    | 2 | 6.24 | 0.46 | -6.16 |
| IPI00853454 | 200 kDa protein                  | R.NFLTQDSADLDSIEAVANEVLK.M                    | 3 | 5.78 | 0.42 | -4.06 |
| IPI00853454 | 200 kDa protein                  | R.NVEELKR.K                                   | 2 | 1.91 | 0.05 | -3.03 |
| IPI00853454 | 200 kDa protein                  | R.SLLKDISQK.V                                 | 2 | 2.13 | 0.17 | -2.23 |
| IPI00853454 | 200 kDa protein                  | R.VESLSQVEVILQHSAAADIAR.A                     | 3 | 2.87 | 0.30 | -3.83 |
| IPI00853454 | 200 kDa protein                  | R.YSDIEPSTEGEVIFR.A                           | 2 | 4.88 | 0.45 | -2.76 |
| IPI00853516 | dynein, axonemal, heavy chain 17 | K.IQAMVAENAELFRADTSLPWKDYVIYIDDM*VLDEFDQFIR.K | 4 | 3.01 | 0.09 | 2.30  |
| IPI00853525 | Apolipoprotein A1                | K.AKPALEDLR.Q                                 | 1 | 2.31 | 0.14 |       |
| IPI00853525 | Apolipoprotein A1                | K.AKPALEDLR.Q                                 | 2 | 2.68 | 0.29 |       |
| IPI00853525 | Apolipoprotein A1                | K.AKPALEDLRQGLLPVLESFK.V                      | 2 | 4.62 | 0.35 |       |
| IPI00853525 | Apolipoprotein A1                | K.AKPALEDLRQGLLPVLESFK.V                      | 3 | 4.00 | 0.34 |       |
| IPI00853525 | Apolipoprotein A1                | K.AKPALEDLRQGLLPVLESFKVSFLSALEEYTK.K          | 3 | 6.06 | 0.45 |       |
| IPI00853525 | Apolipoprotein A1                | K.AKVQPYLDDFQK.K                              | 2 | 2.89 | 0.19 |       |
| IPI00853525 | Apolipoprotein A1                | K.AKVQPYLDDFQKK.W                             | 2 | 3.74 | 0.28 |       |
| IPI00853525 | Apolipoprotein A1                | K.AKVQPYLDDFQKK.W                             | 3 | 3.66 | 0.27 |       |
| IPI00853525 | Apolipoprotein A1                | K.ATEHLSTLSEK.A                               | 1 | 3.22 | 0.33 |       |
| IPI00853525 | Apolipoprotein A1                | K.ATEHLSTLSEK.A                               | 2 | 2.41 | 0.37 | -3.11 |
| IPI00853525 | Apolipoprotein A1                | K.ATEHLSTLSEK.A                               | 3 | 2.83 | 0.25 | -4.22 |
| IPI00853525 | Apolipoprotein A1                | K.ATEHLSTLSEKAKPALEDLR.Q                      | 3 | 3.51 | 0.18 |       |
| IPI00853525 | Apolipoprotein A1                | K.ETEGLRQEM*SKDLEEVK.A                        | 2 | 3.60 | 0.07 |       |
| IPI00853525 | Apolipoprotein A1                | K.ETEGLRQEM*SKDLEEVK.A                        | 3 | 3.70 | 0.14 |       |
| IPI00853525 | Apolipoprotein A1                | K.ETEGLRQEM*SKDLEEVKAK.V                      | 3 | 4.76 | 0.29 |       |
| IPI00853525 | Apolipoprotein A1                | K.ETEGLRQEMSKDLEEVKAK.V                       | 3 | 4.36 | 0.19 |       |
| IPI00853525 | Apolipoprotein A1                | K.KWQEEM*ELYR.Q                               | 2 | 2.78 | 0.28 |       |
| IPI00853525 | Apolipoprotein A1                | K.KWQEEM*ELYR.Q                               | 3 | 4.18 | 0.14 |       |
| IPI00853525 | Apolipoprotein A1                | K.KWQEEMELYR.Q                                | 2 | 2.18 | 0.18 |       |
| IPI00853525 | Apolipoprotein A1                | K.LLDNWDSVTSTFSK.L                            | 1 | 2.70 | 0.26 |       |
| IPI00853525 | Apolipoprotein A1                | K.LLDNWDSVTSTFSK.L                            | 2 | 4.61 | 0.43 |       |
| IPI00853525 | Apolipoprotein A1                | K.LREQLGPVTQEFWDNLEK.E                        | 2 | 6.01 | 0.49 |       |
| IPI00853525 | Apolipoprotein A1                | K.LREQLGPVTQEFWDNLEK.E                        | 3 | 6.33 | 0.41 |       |
| IPI00853525 | Apolipoprotein A1                | K.LREQLGPVTQEFWDNLEKETEGLR.Q                  | 2 | 4.10 | 0.32 |       |
| IPI00853525 | Apolipoprotein A1                | K.LREQLGPVTQEFWDNLEKETEGLR.Q                  | 3 | 6.84 | 0.42 |       |
| IPI00853525 | Apolipoprotein A1                | K.LREQLGPVTQEFWDNLEKETEGLRQEM*SK.D            | 3 | 5.37 | 0.43 |       |
| IPI00853525 | Apolipoprotein A1                | K.LREQLGPVTQEFWDNLEKETEGLRQEMSK.D             | 3 | 5.31 | 0.34 |       |

|             |                                         |                                       |   |      |      |       |
|-------------|-----------------------------------------|---------------------------------------|---|------|------|-------|
| IPI00853525 | Apolipoprotein A1                       | K.LSPLGEEM*R.D                        | 2 | 2.15 | 0.20 |       |
| IPI00853525 | Apolipoprotein A1                       | K.VEPLRAELQEGAR.Q                     | 1 | 2.16 | 0.10 |       |
| IPI00853525 | Apolipoprotein A1                       | K.VEPLRAELQEGAR.Q                     | 2 | 3.11 | 0.17 |       |
| IPI00853525 | Apolipoprotein A1                       | K.VQPYLDDFQKK.W                       | 1 | 2.96 | 0.09 |       |
| IPI00853525 | Apolipoprotein A1                       | K.VQPYLDDFQKK.W                       | 2 | 2.72 | 0.23 |       |
| IPI00853525 | Apolipoprotein A1                       | K.VSFLSALEEYTK.K                      | 1 | 2.99 | 0.32 |       |
| IPI00853525 | Apolipoprotein A1                       | K.VSFLSALEEYTK.K                      | 2 | 4.82 | 0.42 | -4.02 |
| IPI00853525 | Apolipoprotein A1                       | K.VSFLSALEEYTK.K                      | 3 | 3.35 | 0.22 |       |
| IPI00853525 | Apolipoprotein A1                       | K.VSFLSALEEYTKK.L                     | 1 | 3.00 | 0.28 |       |
| IPI00853525 | Apolipoprotein A1                       | K.VSFLSALEEYTKK.L                     | 2 | 4.17 | 0.41 |       |
| IPI00853525 | Apolipoprotein A1                       | K.VSFLSALEEYTKK.L                     | 3 | 1.94 | 0.20 | -2.46 |
| IPI00853525 | Apolipoprotein A1                       | K.WQEEM*ELYR.Q                        | 2 | 3.38 | 0.29 |       |
| IPI00853525 | Apolipoprotein A1                       | K.WQEEMELYR.Q                         | 2 | 3.32 | 0.17 |       |
| IPI00853525 | Apolipoprotein A1                       | R.AHVDALR.T                           | 1 | 2.18 | 0.12 |       |
| IPI00853525 | Apolipoprotein A1                       | R.EQLGPVTQEFWDNLEK.E                  | 2 | 4.35 | 0.50 |       |
| IPI00853525 | Apolipoprotein A1                       | R.EQLGPVTQEFWDNLEKETEGLR.Q            | 2 | 3.31 | 0.40 |       |
| IPI00853525 | Apolipoprotein A1                       | R.EQLGPVTQEFWDNLEKETEGLR.Q            | 3 | 2.91 | 0.34 |       |
| IPI00853525 | Apolipoprotein A1                       | R.EQLGPVTQEFWDNLEKETEGLRQEM*SK.D      | 3 | 3.59 | 0.32 |       |
| IPI00853525 | Apolipoprotein A1                       | R.EQLGPVTQEFWDNLEKETEGLRQEMSK.D       | 3 | 3.61 | 0.25 |       |
| IPI00853525 | Apolipoprotein A1                       | R.EQLGPVTQEFWDNLEKETEGLRQEMSKDLEEVA.A | 3 | 3.36 | 0.07 |       |
| IPI00853525 | Apolipoprotein A1                       | R.LAARLEALKENGGAR.L                   | 2 | 3.91 | 0.35 |       |
| IPI00853525 | Apolipoprotein A1                       | R.LAARLEALKENGGAR.L                   | 3 | 3.99 | 0.26 |       |
| IPI00853525 | Apolipoprotein A1                       | R.LAEYHAK.A                           | 2 | 1.85 | 0.08 | -1.95 |
| IPI00853525 | Apolipoprotein A1                       | R.LEALKENGGAR.L                       | 1 | 2.44 | 0.11 |       |
| IPI00853525 | Apolipoprotein A1                       | R.LEALKENGGAR.L                       | 2 | 2.81 | 0.19 | -1.86 |
| IPI00853525 | Apolipoprotein A1                       | R.QEM*SKDLEEVKAK.V                    | 2 | 2.67 | 0.26 |       |
| IPI00853525 | Apolipoprotein A1                       | R.QEMSKDLEEVKAK.V                     | 2 | 4.07 | 0.29 |       |
| IPI00853525 | Apolipoprotein A1                       | R.QGLLPVLESFK.V                       | 1 | 2.93 | 0.28 |       |
| IPI00853525 | Apolipoprotein A1                       | R.QGLLPVLESFK.V                       | 2 | 2.71 | 0.26 | -4.15 |
| IPI00853525 | Apolipoprotein A1                       | R.QGLLPVLESFKVSFLSALEEYTK.K           | 3 | 3.76 | 0.15 |       |
| IPI00853525 | Apolipoprotein A1                       | R.QKVEPLRAELQEGAR.Q                   | 2 | 2.14 | 0.09 | -3.74 |
| IPI00853525 | Apolipoprotein A1                       | R.THLAPYSDEL.R.Q                      | 1 | 2.91 | 0.41 |       |
| IPI00853525 | Apolipoprotein A1                       | R.THLAPYSDEL.R.Q                      | 2 | 2.35 | 0.28 | -3.15 |
| IPI00853525 | Apolipoprotein A1                       | R.THLAPYSDEL.R.Q                      | 3 | 3.35 | 0.26 |       |
| IPI00853525 | Apolipoprotein A1                       | R.THLAPYSDEL.RQR.L                    | 2 | 3.76 | 0.31 |       |
| IPI00853525 | Apolipoprotein A1                       | R.THLAPYSDEL.RQR.L                    | 3 | 3.05 | 0.32 |       |
| IPI00854624 | Uncharacterized protein ENSP00000375043 | K.DTSKNQVVLTMTNMDPVDATATYYCAR.I       | 3 | 4.47 | 0.29 |       |
| IPI00854624 | Uncharacterized protein ENSP00000375043 | R.LTISKDTSK.N                         | 2 | 2.83 | 0.20 |       |
| IPI00854644 | Uncharacterized protein ENSP00000374805 | G.EIVLTQSPATLSLSPGER.A                | 2 | 5.23 | 0.35 |       |
| IPI00854644 | Uncharacterized protein ENSP00000374805 | R.ATGIPDRFSGSGSGTDFTLTISR.L           | 2 | 4.84 | 0.38 |       |
| IPI00854644 | Uncharacterized protein ENSP00000374805 | R.ATGIPDRFSGSGSGTDFTLTISR.L           | 3 | 3.97 | 0.23 |       |
| IPI00854644 | Uncharacterized protein ENSP00000374805 | R.FSGSGSGTDFTLTISR.L                  | 1 | 2.55 | 0.22 |       |

|             |                                                       |                                |   |      |      |  |
|-------------|-------------------------------------------------------|--------------------------------|---|------|------|--|
| IPI00854644 | Uncharacterized protein ENSP00000374805               | R.FSGSGSGTDFLTISR.L            | 2 | 4.49 | 0.53 |  |
| IPI00854667 | Uncharacterized protein ENSP00000375015               | K.NSLYLQM*NSLR.A               | 2 | 3.76 | 0.14 |  |
| IPI00854667 | Uncharacterized protein ENSP00000375015               | K.NSLYLQMNSLR.A                | 1 | 3.55 | 0.11 |  |
| IPI00854667 | Uncharacterized protein ENSP00000375015               | K.NSLYLQMNSLR.A                | 2 | 4.01 | 0.17 |  |
| IPI00854667 | Uncharacterized protein ENSP00000375015               | R.AEDTALYHCAR.-                | 2 | 2.42 | 0.12 |  |
| IPI00854667 | Uncharacterized protein ENSP00000375015               | R.DNAKNSLYLQM*NSLR.A           | 2 | 4.82 | 0.44 |  |
| IPI00854667 | Uncharacterized protein ENSP00000375015               | R.DNAKNSLYLQM*NSLR.A           | 3 | 4.39 | 0.37 |  |
| IPI00854707 | Immunoglobulin heavy chain variable region (Fragment) | K.NTLYLQMNSLR.A                | 1 | 3.28 | 0.09 |  |
| IPI00854707 | Immunoglobulin heavy chain variable region (Fragment) | K.NTLYLQMNSLR.A                | 2 | 4.45 | 0.07 |  |
| IPI00854707 | Immunoglobulin heavy chain variable region (Fragment) | R.DNSKNTLYLQM*NSLR.A           | 2 | 3.02 | 0.07 |  |
| IPI00854707 | Immunoglobulin heavy chain variable region (Fragment) | R.DNSKNTLYLQM*NSLR.A           | 3 | 3.90 | 0.23 |  |
| IPI00854709 | Uncharacterized protein ENSP00000374799 (Fragment)    | -.EDIVM*TQTPLSLPVTGPESASISCR.S | 3 | 3.63 | 0.09 |  |
| IPI00854709 | Uncharacterized protein ENSP00000374799 (Fragment)    | R.ASGVPDRFSGSGSGTDFTLK.I       | 2 | 4.21 | 0.34 |  |
| IPI00854709 | Uncharacterized protein ENSP00000374799 (Fragment)    | R.ASGVPDRFSGSGSGTDFTLK.I       | 3 | 4.21 | 0.29 |  |
| IPI00854709 | Uncharacterized protein ENSP00000374799 (Fragment)    | R.ASGVPDRFSGSGSGTDFTLKISR.V    | 3 | 3.90 | 0.22 |  |
| IPI00854709 | Uncharacterized protein ENSP00000374799 (Fragment)    | R.FSGSGSGTDFTLK.I              | 1 | 2.83 | 0.22 |  |
| IPI00854709 | Uncharacterized protein ENSP00000374799 (Fragment)    | R.FSGSGSGTDFTLK.I              | 2 | 3.86 | 0.19 |  |
| IPI00854709 | Uncharacterized protein ENSP00000374799 (Fragment)    | R.VEAEDVGYYCM*QR.I             | 2 | 4.21 | 0.17 |  |
| IPI00854709 | Uncharacterized protein ENSP00000374799 (Fragment)    | R.VEAEDVGYYCM*QR.I             | 3 | 4.43 | 0.08 |  |
| IPI00854709 | Uncharacterized protein ENSP00000374799 (Fragment)    | R.VEAEDVGYYCMQR.I              | 2 | 4.77 | 0.30 |  |
| IPI00854743 | Uncharacterized protein ENSP00000375034               | K.AYGGTTEYAASVK.G              | 2 | 2.91 | 0.28 |  |
| IPI00854743 | Uncharacterized protein ENSP00000375034               | K.GLEWVG FIR.S                 | 2 | 3.18 | 0.23 |  |
| IPI00854743 | Uncharacterized protein ENSP00000375034               | K.SIAYLQM*NSLK.T               | 2 | 2.24 | 0.12 |  |
| IPI00854743 | Uncharacterized protein ENSP00000375034               | K.SIAYLQMNSLK.T                | 2 | 3.69 | 0.32 |  |
| IPI00854743 | Uncharacterized protein ENSP00000375034               | K.TEDTAVYYCTR.D                | 2 | 4.38 | 0.33 |  |
| IPI00854743 | Uncharacterized protein ENSP00000375034               | R.DDSKSIAYLQM*NSLK.T           | 2 | 2.59 | 0.11 |  |
| IPI00854743 | Uncharacterized protein ENSP00000375034               | R.FTISRDDSK.N                  | 2 | 2.52 | 0.15 |  |
| IPI00854743 | Uncharacterized protein ENSP00000375034               | R.QAPGKLEWVG FIR.S             | 3 | 2.69 | 0.25 |  |
| IPI00854745 | Uncharacterized protein ENSP00000375019               | R.VTM*TEDTSTDTAYM*ELSSLR.S     | 2 | 5.94 | 0.46 |  |

|             |                                                                        |                                        |   |      |      |       |
|-------------|------------------------------------------------------------------------|----------------------------------------|---|------|------|-------|
| IPI00854806 | IGKV1-5 protein                                                        | -.DIVM* <u>TQSPLSLP</u> VTPGEPASISCR.S | 2 | 5.32 | 0.47 |       |
| IPI00854806 | IGKV1-5 protein                                                        | -.DIVM* <u>TQSPLSLP</u> VTPGEPASISCR.S | 3 | 5.28 | 0.41 |       |
| IPI00854806 | IGKV1-5 protein                                                        | -.DIVM <u>TQSPLSLP</u> VTPGEPASISCR.S  | 2 | 4.80 | 0.34 |       |
| IPI00854806 | IGKV1-5 protein                                                        | -.DIVM <u>TQSPLSLP</u> VTPGEPASISCR.S  | 3 | 4.58 | 0.31 |       |
| IPI00854806 | IGKV1-5 protein                                                        | K.ADYEKHKVYACEVTHQGLSSPVTK.S           | 3 | 6.20 | 0.45 |       |
| IPI00854806 | IGKV1-5 protein                                                        | K.DSTYLSSTLTLSK.A                      | 1 | 3.19 | 0.31 |       |
| IPI00854806 | IGKV1-5 protein                                                        | K.DSTYLSSTLTLSK.A                      | 2 | 2.59 | 0.17 | -2.80 |
| IPI00854806 | IGKV1-5 protein                                                        | K.DSTYLSSTLTLSK.A                      | 3 | 3.23 | 0.27 |       |
| IPI00854806 | IGKV1-5 protein                                                        | K.HKVYACEVTHQGLSSPVTK.S                | 3 | 4.56 | 0.36 |       |
| IPI00854806 | IGKV1-5 protein                                                        | K.RTVAAPSVFIFPPSDEQLK.S                | 2 | 5.74 | 0.42 |       |
| IPI00854806 | IGKV1-5 protein                                                        | K.RTVAAPSVFIFPPSDEQLK.S                | 3 | 4.14 | 0.22 |       |
| IPI00854806 | IGKV1-5 protein                                                        | K.SGTASVVCLLNNFYPR.E                   | 1 | 4.08 | 0.39 |       |
| IPI00854806 | IGKV1-5 protein                                                        | K.SGTASVVCLLNNFYPR.E                   | 2 | 3.05 | 0.36 | -5.56 |
| IPI00854806 | IGKV1-5 protein                                                        | K.SGTASVVCLLNNFYPR.E                   | 3 | 4.63 | 0.31 |       |
| IPI00854806 | IGKV1-5 protein                                                        | K.VDNTLQSGNSQESVTEQDSK.D               | 2 | 3.75 | 0.22 |       |
| IPI00854806 | IGKV1-5 protein                                                        | K.VYACEVTHQGLSSPVTK.S                  | 1 | 4.33 | 0.48 |       |
| IPI00854806 | IGKV1-5 protein                                                        | K.VYACEVTHQGLSSPVTK.S                  | 2 | 5.40 | 0.48 |       |
| IPI00854806 | IGKV1-5 protein                                                        | K.VYACEVTHQGLSSPVTK.S                  | 3 | 4.16 | 0.44 |       |
| IPI00854806 | IGKV1-5 protein                                                        | Q.SGNSQESVTEQDSKDSTYLSSTLTLSK.A        | 3 | 6.25 | 0.52 |       |
| IPI00854806 | IGKV1-5 protein                                                        | R.ASGVPDRFSGSGSGTDFTLK.I               | 2 | 4.21 | 0.34 |       |
| IPI00854806 | IGKV1-5 protein                                                        | R.ASGVPDRFSGSGSGTDFTLK.I               | 3 | 4.21 | 0.29 |       |
| IPI00854806 | IGKV1-5 protein                                                        | R.FSGSGSGTDFTLK.I                      | 1 | 2.83 | 0.22 |       |
| IPI00854806 | IGKV1-5 protein                                                        | R.FSGSGSGTDFTLK.I                      | 2 | 3.86 | 0.19 |       |
| IPI00854806 | IGKV1-5 protein                                                        | R.TVAAPSVF.-                           | 1 | 1.75 | 0.12 |       |
| IPI00854806 | IGKV1-5 protein                                                        | R.TVAAPSVFIFPPSDEQLK.S                 | 1 | 3.65 | 0.48 |       |
| IPI00854806 | IGKV1-5 protein                                                        | R.TVAAPSVFIFPPSDEQLK.S                 | 2 | 4.89 | 0.48 |       |
| IPI00854806 | IGKV1-5 protein                                                        | R.TVAAPSVFIFPPSDEQLK.S                 | 3 | 4.07 | 0.25 |       |
| IPI00854806 | IGKV1-5 protein                                                        | R.TVAAPSVFIFPPSDEQLKSGTASVVCLLNNFYPR.E | 3 | 5.23 | 0.48 |       |
| IPI00854806 | IGKV1-5 protein                                                        | V.YACEVTHQGLSSPVTK.S                   | 2 | 5.14 | 0.43 |       |
| IPI00854841 | Uncharacterized protein ENSP00000375033                                | K.NSLYLQM*NSLR.A                       | 2 | 3.76 | 0.14 |       |
| IPI00854841 | Uncharacterized protein ENSP00000375033                                | K.NSLYLQMNSLR.A                        | 1 | 3.55 | 0.11 |       |
| IPI00854841 | Uncharacterized protein ENSP00000375033                                | K.NSLYLQMNSLR.A                        | 2 | 4.01 | 0.17 |       |
| IPI00854841 | Uncharacterized protein ENSP00000375033                                | R.DEDTAVYYCAR.E                        | 2 | 4.25 | 0.28 |       |
| IPI00854841 | Uncharacterized protein ENSP00000375033                                | R.DNAKNSLYLQM*NSLR.A                   | 2 | 4.82 | 0.44 |       |
| IPI00854841 | Uncharacterized protein ENSP00000375033                                | R.DNAKNSLYLQM*NSLR.A                   | 3 | 4.39 | 0.37 |       |
| IPI00854841 | Uncharacterized protein ENSP00000375033                                | R.LSCAASGFTFSSYSMMNWV.R                | 2 | 4.03 | 0.30 |       |
| IPI00855725 | Isoform 4 of Trans-Golgi network integral membrane protein 2 precursor | K.DGSNKS <del>GAE</del> EQGPIDGPSK.S   | 2 | 4.31 | 0.47 | -2.87 |
| IPI00855725 | Isoform 4 of Trans-Golgi network integral membrane protein 2 precursor | K.DGSNKS <del>GAE</del> EQGPIDGPSK.S   | 3 | 4.19 | 0.32 | -1.39 |
| IPI00855725 | Isoform 4 of Trans-Golgi network integral membrane protein 2 precursor | K.DGSSK <del>SGA</del> EDQTPKDVPNK.S   | 3 | 2.62 | 0.30 | -1.11 |

|             |                                                                        |                             |   |      |      |       |
|-------------|------------------------------------------------------------------------|-----------------------------|---|------|------|-------|
| IPI00855725 | Isoform 4 of Trans-Golgi network integral membrane protein 2 precursor | K.DSTGKSGAEAQTPEDSPNR.S     | 2 | 3.65 | 0.52 | -2.12 |
| IPI00855725 | Isoform 4 of Trans-Golgi network integral membrane protein 2 precursor | K.DSTGKSGAEAQTPEDSPNR.S     | 3 | 2.81 | 0.14 | -2.25 |
| IPI00855725 | Isoform 4 of Trans-Golgi network integral membrane protein 2 precursor | K.DVPNKSGADGQTPK.D          | 2 | 3.07 | 0.37 | -3.60 |
| IPI00855725 | Isoform 4 of Trans-Golgi network integral membrane protein 2 precursor | K.M*SGSASSENREGTLS.D        | 2 | 4.25 | 0.53 | -3.63 |
| IPI00855725 | Isoform 4 of Trans-Golgi network integral membrane protein 2 precursor | K.SGAEAQTPEDSPNR.S          | 2 | 4.23 | 0.45 | -3.23 |
| IPI00855725 | Isoform 4 of Trans-Golgi network integral membrane protein 2 precursor | K.SGAEAQTPEDSPNRSGAEAK.T    | 2 | 4.25 | 0.46 | -2.78 |
| IPI00855725 | Isoform 4 of Trans-Golgi network integral membrane protein 2 precursor | K.SGAEDQTPKDVPNK.S          | 2 | 4.18 | 0.38 | -2.34 |
| IPI00855725 | Isoform 4 of Trans-Golgi network integral membrane protein 2 precursor | K.SGAEDQTPKDVPNK.S          | 3 | 3.00 | 0.27 | -3.59 |
| IPI00855725 | Isoform 4 of Trans-Golgi network integral membrane protein 2 precursor | K.SGAEDQTPKDVPNKSGAEK.Q     | 2 | 5.15 | 0.49 | -4.42 |
| IPI00855725 | Isoform 4 of Trans-Golgi network integral membrane protein 2 precursor | K.SGAEDQTPKDVPNKSGAEK.Q     | 3 | 4.36 | 0.42 | -3.34 |
| IPI00855725 | Isoform 4 of Trans-Golgi network integral membrane protein 2 precursor | K.SGAEDQTPKDVPNKSGAEKQTPK.D | 4 | 3.11 | 0.12 | 0.19  |
| IPI00855725 | Isoform 4 of Trans-Golgi network integral membrane protein 2 precursor | K.SGAEEQGPIDGPSK.S          | 2 | 4.78 | 0.44 | -3.19 |
| IPI00855725 | Isoform 4 of Trans-Golgi network integral membrane protein 2 precursor | K.SGAEEQTSKDSPNKEEVK.S      | 3 | 2.67 | 0.17 | -3.54 |
| IPI00855725 | Isoform 4 of Trans-Golgi network integral membrane protein 2 precursor | K.SGSEAQTTKDVPNK.S          | 2 | 3.55 | 0.35 | -4.09 |
| IPI00855725 | Isoform 4 of Trans-Golgi network integral membrane protein 2 precursor | K.SGSEAQTTKDVPNKSGADGQTPK.D | 3 | 4.50 | 0.38 | -3.30 |
| IPI00855725 | Isoform 4 of Trans-Golgi network integral membrane protein 2 precursor | K.SGSEAQTTKDVPNKSGADGQTPK.D | 4 | 2.86 | 0.15 | -3.06 |
| IPI00855725 | Isoform 4 of Trans-Golgi network integral membrane protein 2 precursor | K.SHPELQTPK.D               | 1 | 2.42 | 0.11 | -3.49 |
| IPI00855725 | Isoform 4 of Trans-Golgi network integral membrane protein 2 precursor | K.SHPELQTPK.D               | 2 | 2.08 | 0.31 | -1.72 |
| IPI00855725 | Isoform 4 of Trans-Golgi network integral membrane protein 2 precursor | K.SHPEPQTPK.D               | 1 | 1.42 | 0.13 | -2.63 |
| IPI00855725 | Isoform 4 of Trans-Golgi network integral membrane protein 2 precursor | K.SHPEPQTPK.D               | 2 | 1.94 | 0.18 | -1.82 |
| IPI00855725 | Isoform 4 of Trans-Golgi network integral membrane protein 2 precursor | K.SHPEPQTPKDSPSK.S          | 2 | 2.96 | 0.42 | -4.33 |

|             |                                                                        |                                   |   |      |      |       |
|-------------|------------------------------------------------------------------------|-----------------------------------|---|------|------|-------|
| IPI00855725 | Isoform 4 of Trans-Golgi network integral membrane protein 2 precursor | K.SSAEAQTPEDTPNK.S                | 2 | 4.48 | 0.37 | -4.38 |
| IPI00855725 | Isoform 4 of Trans-Golgi network integral membrane protein 2 precursor | K.SSAEAQTPEDTPNKSGAEAK.T          | 2 | 5.08 | 0.47 | -4.32 |
| IPI00855725 | Isoform 4 of Trans-Golgi network integral membrane protein 2 precursor | K.SSAEAQTPEDTPNKSGAEAK.T          | 3 | 3.63 | 0.21 | -3.41 |
| IPI00855725 | Isoform 4 of Trans-Golgi network integral membrane protein 2 precursor | K.SSEPTEDVEPK.E                   | 2 | 2.41 | 0.24 | -2.52 |
| IPI00855824 | dipeptidyl-peptidase 6 isoform 3                                       | K.IHDPEAK.W                       | 2 | 1.84 | 0.15 | -3.29 |
| IPI00855824 | dipeptidyl-peptidase 6 isoform 3                                       | K.ILAYDEK.G                       | 2 | 1.93 | 0.12 | -2.70 |
| IPI00855824 | dipeptidyl-peptidase 6 isoform 3                                       | K.ILAYDEKGNKIYFLSTEDLPR.R         | 4 | 3.15 | 0.20 | -1.82 |
| IPI00855824 | dipeptidyl-peptidase 6 isoform 3                                       | K.IPHGDPQSLDPPEVSNK.L             | 3 | 2.53 | 0.12 | -1.46 |
| IPI00855824 | dipeptidyl-peptidase 6 isoform 3                                       | K.IYFLSTEDLPR.R                   | 2 | 3.57 | 0.27 | -3.03 |
| IPI00855824 | dipeptidyl-peptidase 6 isoform 3                                       | K.KKVTVEDLFSDFK.I                 | 2 | 4.63 | 0.46 | -3.17 |
| IPI00855824 | dipeptidyl-peptidase 6 isoform 3                                       | K.KKVTVEDLFSDFKIHDPEAK.W          | 5 | 2.62 | 0.13 | -2.40 |
| IPI00855824 | dipeptidyl-peptidase 6 isoform 3                                       | K.LYASAFSER.Y                     | 2 | 2.98 | 0.29 | -1.06 |
| IPI00855824 | dipeptidyl-peptidase 6 isoform 3                                       | K.M*FDLETNEHVKK.A                 | 2 | 3.65 | 0.34 | -0.80 |
| IPI00855824 | dipeptidyl-peptidase 6 isoform 3                                       | K.VTVEDLFSDFK.I                   | 2 | 1.97 | 0.16 | -3.14 |
| IPI00855824 | dipeptidyl-peptidase 6 isoform 3                                       | K.VTVEDLFSDFKIHDPEAK.W            | 3 | 3.37 | 0.22 | -2.52 |
| IPI00855824 | dipeptidyl-peptidase 6 isoform 3                                       | K.VTVEDLFSDFKIHDPEAK.W            | 4 | 2.50 | 0.25 | -0.69 |
| IPI00855824 | dipeptidyl-peptidase 6 isoform 3                                       | L.TPAEDNLSLQK.K                   | 2 | 2.93 | 0.34 | -2.15 |
| IPI00855824 | dipeptidyl-peptidase 6 isoform 3                                       | R.LGLLEEKDQM*EAVR.T               | 3 | 3.77 | 0.36 | -0.69 |
| IPI00855824 | dipeptidyl-peptidase 6 isoform 3                                       | R.QLYSANTVGNFNR.Q                 | 2 | 4.04 | 0.50 | -3.26 |
| IPI00855824 | dipeptidyl-peptidase 6 isoform 3                                       | R.SIINFFVECFR.I                   | 2 | 3.72 | 0.45 | -3.35 |
| IPI00855824 | dipeptidyl-peptidase 6 isoform 3                                       | R.TM*LKEQYIDR.T                   | 2 | 1.99 | 0.12 | -2.69 |
| IPI00855824 | dipeptidyl-peptidase 6 isoform 3                                       | R.VSALEEQQFLIIHPTADEK.I           | 3 | 4.23 | 0.45 | -3.99 |
| IPI00855824 | dipeptidyl-peptidase 6 isoform 3                                       | S.VILLTPAEDNLSLQK.K               | 2 | 3.49 | 0.38 | -1.75 |
| IPI00855918 | mucin 5, subtype B, tracheobronchial                                   | R.WECSHRLCLGTCVAYGDGHFITFDGDR.Y   | 3 | 1.96 | 0.10 | -0.63 |
| IPI00856012 | collagen type VI alpha 6                                               | R.VALLSHAPPDFLPNTQK.S             | 2 | 1.16 | 0.08 | -3.82 |
| IPI00867509 | Coronin-1C_i3 protein                                                  | R.AIFLADGNVFTTGFSR.M              | 2 | 3.42 | 0.43 | -1.17 |
| IPI00867665 | Similar to Protein disulfide-isomerase precursor                       | K.QFLQAAEAIDDIPFGITSNSDVFSK.Y     | 3 | 4.12 | 0.41 | -4.17 |
| IPI00867665 | Similar to Protein disulfide-isomerase precursor                       | K.YQLDKDGVVLFK.K                  | 3 | 2.92 | 0.40 | -1.59 |
| IPI00867665 | Similar to Protein disulfide-isomerase precursor                       | K.YQLDKDGVVLFK.F                  | 3 | 2.67 | 0.25 | 0.23  |
| IPI00867665 | Similar to Protein disulfide-isomerase precursor                       | R.NNFEGEVTKENLLDFIK.H             | 3 | 3.18 | 0.27 | -2.91 |
| IPI00867665 | Similar to Protein disulfide-isomerase precursor                       | R.TGPAATTLPDGAAASLVESSEVAVIGFFK.D | 3 | 4.50 | 0.49 | -8.44 |
| IPI00871139 | 92 kDa protein                                                         | K.APEPISTQSHSVLILFHSNDSNGENR.G    | 4 | 3.04 | 0.14 | -1.53 |
| IPI00871139 | 92 kDa protein                                                         | K.DNVEM*DTFQIECLK.D               | 2 | 3.06 | 0.22 |       |
| IPI00871139 | 92 kDa protein                                                         | K.DQVLVSCDTGYK.V                  | 2 | 3.81 | 0.34 | -3.52 |
| IPI00871139 | 92 kDa protein                                                         | K.SDFSNEER.F                      | 2 | 2.18 | 0.17 | -2.43 |
| IPI00871139 | 92 kDa protein                                                         | K.YSCQEPYYK.M                     | 2 | 2.54 | 0.29 |       |
| IPI00871139 | 92 kDa protein                                                         | R.AAGNECPQLQPPVHGK.I              | 2 | 2.11 | 0.25 |       |
| IPI00871139 | 92 kDa protein                                                         | R.APGELEHGLITFSTR.N               | 3 | 3.37 | 0.40 | -2.15 |

|             |                                            |                                       |   |      |      |       |
|-------------|--------------------------------------------|---------------------------------------|---|------|------|-------|
| IPI00871139 | 92 kDa protein                             | R.ETTDTEQTPGQEVVLSPGSFM*SITFR.S       | 3 | 4.46 | 0.32 | -5.59 |
| IPI00871139 | 92 kDa protein                             | R.LRSDENEQHLGVK.H                     | 2 | 3.19 | 0.26 | -3.64 |
| IPI00871139 | 92 kDa protein                             | R.TGVITSPDFPNYPK.S                    | 2 | 3.60 | 0.27 |       |
| IPI00871227 | Isoform 1 of Hemicentin-1 precursor        | K.GDLELRPSTFLIIDPLLGLLK.I             | 3 | 3.81 | 0.26 | -2.84 |
| IPI00871227 | Isoform 1 of Hemicentin-1 precursor        | R.FLQITNVQVPHTGR.Y                    | 3 | 2.39 | 0.24 | -2.13 |
| IPI00871227 | Isoform 1 of Hemicentin-1 precursor        | R.IDLLELLSISGSSLK.T                   | 2 | 3.44 | 0.41 | -4.32 |
| IPI00871227 | Isoform 1 of Hemicentin-1 precursor        | R.TTFLM*VDEEQVPPFALRDENLK.G           | 3 | 3.37 | 0.32 | -4.14 |
| IPI00871326 | plexin A1                                  | K.ILVDLSPNGGRPALAYESVVAQEGSPILR.D     | 3 | 4.76 | 0.42 | -3.28 |
| IPI00871326 | plexin A1                                  | K.LLLLDYAANR.L                        | 2 | 3.59 | 0.33 | -3.21 |
| IPI00871326 | plexin A1                                  | K.LSLPWLLNK.E                         | 2 | 2.48 | 0.23 | -0.74 |
| IPI00871326 | plexin A1                                  | K.NLPQPQSGQR.G                        | 2 | 1.99 | 0.13 | -0.72 |
| IPI00871326 | plexin A1                                  | K.SEYFPTLSSR.K                        | 2 | 2.11 | 0.17 | -2.33 |
| IPI00871326 | plexin A1                                  | R.AGGGSQPPFR.T                        | 2 | 2.38 | 0.17 | -1.36 |
| IPI00871326 | plexin A1                                  | R.AHVTGPVEDNEK.C                      | 2 | 3.19 | 0.38 | -4.23 |
| IPI00871326 | plexin A1                                  | R.DLVLSPNHQYLYAM*TEK.Q                | 3 | 3.16 | 0.18 | -2.29 |
| IPI00871326 | plexin A1                                  | R.KILVDLSNPGGRPALAYESVVAQEGSPILR.D    | 4 | 2.77 | 0.23 | -4.51 |
| IPI00871533 | Uncharacterized protein C3orf48 (Fragment) | K.ETYCPIIPNKSPSK.G                    | 2 | 2.02 | 0.05 | -2.13 |
| IPI00871556 | 107 kDa protein                            | R.AGAAMMNR.F                          | 2 | 1.58 | 0.17 |       |
| IPI00872363 | PTPRD protein                              | K.GYYIIIVPLKK.S                       | 2 | 3.43 | 0.43 | -4.48 |
| IPI00872363 | PTPRD protein                              | K.GYYIIIVPLKK.S                       | 3 | 2.87 | 0.30 | -3.75 |
| IPI00872363 | PTPRD protein                              | K.HNVADSQITTIGNLVPQK.T                | 2 | 3.88 | 0.50 | -3.32 |
| IPI00872363 | PTPRD protein                              | K.HNVADSQITTIGNLVPQKTYSVK.V           | 3 | 6.15 | 0.49 | -1.87 |
| IPI00872363 | PTPRD protein                              | K.ILYDDGKM*VEEVDGR.A                  | 3 | 3.65 | 0.34 | -2.62 |
| IPI00872363 | PTPRD protein                              | K.KVSNQRFEVIEFDDGSGSVLR.I             | 3 | 4.66 | 0.47 | -1.18 |
| IPI00872363 | PTPRD protein                              | K.LIVNLKPEK.S                         | 2 | 2.45 | 0.18 | -2.57 |
| IPI00872363 | PTPRD protein                              | K.M*VEEVDGR.A                         | 2 | 2.33 | 0.13 | -1.84 |
| IPI00872363 | PTPRD protein                              | K.NSEELYKEIDGVATTR.Y                  | 3 | 3.38 | 0.38 | -2.06 |
| IPI00872363 | PTPRD protein                              | K.SYSFVLNTR.G                         | 1 | 1.61 | 0.12 | -2.28 |
| IPI00872363 | PTPRD protein                              | K.SYSFVLNTR.G                         | 2 | 3.47 | 0.26 | -1.82 |
| IPI00872363 | PTPRD protein                              | K.TNLDGM*ITVQLPEVPANENIK.G            | 2 | 4.72 | 0.49 | -5.07 |
| IPI00872363 | PTPRD protein                              | K.VSNQRFEVIEFDDGSGSVLR.I              | 3 | 4.46 | 0.34 | -3.71 |
| IPI00872363 | PTPRD protein                              | K.WM*LGAEDLTPEDDM*PIGR.N              | 2 | 3.53 | 0.42 | -2.68 |
| IPI00872363 | PTPRD protein                              | P.VLTQTSEQAPSSAPR.D                   | 2 | 4.27 | 0.35 | -2.52 |
| IPI00872363 | PTPRD protein                              | R.EVELKPYIAAHFDVLPTEFTLGDDKHYGGFTNK.Q | 3 | 4.11 | 0.32 | -5.08 |
| IPI00872363 | PTPRD protein                              | R.EVELKPYIAAHFDVLPTEFTLGDDKHYGGFTNK.Q | 4 | 4.71 | 0.48 | -3.02 |
| IPI00872363 | PTPRD protein                              | R.EVELKPYIAAHFDVLPTEFTLGDDKHYGGFTNK.Q | 5 | 3.66 | 0.24 | -3.70 |
| IPI00872363 | PTPRD protein                              | R.GALQIEQSEESDQGGKYECVATNSAGTR.Y      | 3 | 6.59 | 0.59 | -2.64 |
| IPI00872363 | PTPRD protein                              | R.GFPTIDM*GPQLK.V                     | 2 | 2.74 | 0.26 | -3.67 |
| IPI00872363 | PTPRD protein                              | R.GPPSEPVLVTQTSEQAPSSAPR.D            | 2 | 4.98 | 0.60 | -2.90 |
| IPI00872363 | PTPRD protein                              | R.ITIEPGTSYR.L                        | 2 | 2.44 | 0.24 | -1.91 |
| IPI00872363 | PTPRD protein                              | R.LQGLKPNSLYYFR.L                     | 2 | 2.32 | 0.24 | -3.75 |
| IPI00872363 | PTPRD protein                              | R.LTVLREDQIPR.G                       | 3 | 2.42 | 0.26 | -3.08 |

|             |                                                                                |                                       |   |      |      |       |
|-------------|--------------------------------------------------------------------------------|---------------------------------------|---|------|------|-------|
| IPI00872363 | PTPRD protein                                                                  | R.NVLELNDVR.Q                         | 1 | 2.93 | 0.22 | -2.75 |
| IPI00872363 | PTPRD protein                                                                  | R.NVLELNDVR.Q                         | 2 | 3.13 | 0.26 | -2.16 |
| IPI00872363 | PTPRD protein                                                                  | R.SPQGLGASTAEISAR.T                   | 2 | 4.61 | 0.47 | -3.72 |
| IPI00872363 | PTPRD protein                                                                  | R.TATM*LCAASGNPDPEITWFKDFLPVDTSNNGR.I | 3 | 5.81 | 0.53 | -1.15 |
| IPI00872363 | PTPRD protein                                                                  | R.TATM*LCAASGNPDPEITWFKDFLPVDTSNNGR.I | 4 | 3.94 | 0.38 | -2.09 |
| IPI00872363 | PTPRD protein                                                                  | R.TPVDQGTGVSGGVASFICQATGDPRPK.I       | 2 | 3.76 | 0.54 | -1.52 |
| IPI00872363 | PTPRD protein                                                                  | R.TPVDQGTGVSGGVASFICQATGDPRPK.I       | 3 | 3.93 | 0.48 | -2.52 |
| IPI00872363 | PTPRD protein                                                                  | R.TPVDQGTGVSGGVASFICQATGDPRPK.I       | 4 | 2.50 | 0.15 | -1.89 |
| IPI00872363 | PTPRD protein                                                                  | R.VVAVNNIGR.G                         | 2 | 3.13 | 0.25 | -2.06 |
| IPI00872363 | PTPRD protein                                                                  | R.VVAVNNIGRGGPPSEPVLTQTSEQAPSSAPR.D   | 3 | 5.98 | 0.60 | -2.36 |
| IPI00872363 | PTPRD protein                                                                  | R.YSAPANLYVR.E                        | 1 | 1.79 | 0.17 | -2.65 |
| IPI00872363 | PTPRD protein                                                                  | R.YSAPANLYVR.E                        | 2 | 2.87 | 0.33 | -2.22 |
| IPI00872363 | PTPRD protein                                                                  | R.YSVAGLSPYSYEFV.V                    | 2 | 3.48 | 0.46 | -2.49 |
| IPI00872550 | Uncharacterized protein PRDM2                                                  | R.SLQLAAAADLSENKREDGSAKQELKDFRFTL.-   | 5 | 2.22 | 0.10 | -1.52 |
| IPI00872555 | cDNA FLJ76262, highly similar to Homo sapiens I factor (complement) (IF), mRNA | C.KVITYTSQEDLVEK.K                    | 2 | 4.88 | 0.46 | -3.48 |
| IPI00872555 | cDNA FLJ76262, highly similar to Homo sapiens I factor (complement) (IF), mRNA | C.KVITYTSQEDLVEKK.C                   | 2 | 4.84 | 0.45 | -4.68 |
| IPI00872555 | cDNA FLJ76262, highly similar to Homo sapiens I factor (complement) (IF), mRNA | C.KVITYTSQEDLVEKK.C                   | 3 | 5.51 | 0.48 | -2.62 |
| IPI00872555 | cDNA FLJ76262, highly similar to Homo sapiens I factor (complement) (IF), mRNA | K.ACDGINDCGDQSDELCK.A                 | 2 | 6.05 | 0.69 | -4.73 |
| IPI00872555 | cDNA FLJ76262, highly similar to Homo sapiens I factor (complement) (IF), mRNA | K.ACDGINDCGDQSDELCK.A                 | 3 | 2.05 | 0.15 | -3.00 |
| IPI00872555 | cDNA FLJ76262, highly similar to Homo sapiens I factor (complement) (IF), mRNA | K.ADSPM*DDFFQCVNGK.Y                  | 2 | 4.57 | 0.37 | -5.39 |
| IPI00872555 | cDNA FLJ76262, highly similar to Homo sapiens I factor (complement) (IF), mRNA | K.ADSPM*DDFFQCVNGK.Y                  | 3 | 2.60 | 0.18 | -3.40 |
| IPI00872555 | cDNA FLJ76262, highly similar to Homo sapiens I factor (complement) (IF), mRNA | K.LVDQDKTM*FICK.S                     | 2 | 3.31 | 0.24 |       |
| IPI00872555 | cDNA FLJ76262, highly similar to Homo sapiens I factor (complement) (IF), mRNA | K.LVDQDKTM*FICK.S                     | 3 | 1.85 | 0.23 | -0.08 |
| IPI00872555 | cDNA FLJ76262, highly similar to Homo sapiens I factor (complement) (IF), mRNA | K.RIVIEYVDR.I                         | 2 | 2.27 | 0.14 | -2.54 |
| IPI00872555 | cDNA FLJ76262, highly similar to Homo sapiens I factor (complement) (IF), mRNA | K.VANYFDWISYHVGRPFISQYNV.-            | 3 | 3.62 | 0.23 | -2.90 |
| IPI00872555 | cDNA FLJ76262, highly similar to Homo sapiens I factor (complement) (IF), mRNA | R.AQLGDLPWQVAIK.D                     | 2 | 4.30 | 0.46 | -4.74 |
| IPI00872555 | cDNA FLJ76262, highly similar to Homo sapiens I factor (complement) (IF), mRNA | R.AQLGDLPWQVAIK.D                     | 3 | 4.73 | 0.35 | -2.62 |
| IPI00872555 | cDNA FLJ76262, highly similar to Homo sapiens I factor (complement) (IF), mRNA | R.CIEGTCVCK.L                         | 2 | 2.35 | 0.31 | -1.42 |



|             |                                                                                |                                       |   |      |      |       |
|-------------|--------------------------------------------------------------------------------|---------------------------------------|---|------|------|-------|
| IPI00872555 | cDNA FLJ76262, highly similar to Homo sapiens I factor (complement) (IF), mRNA | R.EANVACLDLGFQQGADTQR.R               | 2 | 6.52 | 0.54 | -3.47 |
| IPI00872555 | cDNA FLJ76262, highly similar to Homo sapiens I factor (complement) (IF), mRNA | R.EANVACLDLGFQQGADTQR.R               | 3 | 5.34 | 0.56 | -3.65 |
| IPI00872555 | cDNA FLJ76262, highly similar to Homo sapiens I factor (complement) (IF), mRNA | R.GLETSLAECTFTK.R                     | 2 | 4.95 | 0.45 | -1.90 |
| IPI00872555 | cDNA FLJ76262, highly similar to Homo sapiens I factor (complement) (IF), mRNA | R.IIFHENYNAGTYQNDIALIEM*K.K           | 2 | 6.27 | 0.51 | -2.52 |
| IPI00872555 | cDNA FLJ76262, highly similar to Homo sapiens I factor (complement) (IF), mRNA | R.IIFHENYNAGTYQNDIALIEM*K.K           | 3 | 3.66 | 0.35 | -4.20 |
| IPI00872555 | cDNA FLJ76262, highly similar to Homo sapiens I factor (complement) (IF), mRNA | R.IIFHENYNAGTYQNDIALIEM*KK.D          | 3 | 3.33 | 0.29 | -4.08 |
| IPI00872555 | cDNA FLJ76262, highly similar to Homo sapiens I factor (complement) (IF), mRNA | R.IVIEYVDR.I                          | 1 | 2.57 | 0.20 | -3.68 |
| IPI00872555 | cDNA FLJ76262, highly similar to Homo sapiens I factor (complement) (IF), mRNA | R.IVIEYVDR.I                          | 2 | 2.87 | 0.28 | -3.16 |
| IPI00872555 | cDNA FLJ76262, highly similar to Homo sapiens I factor (complement) (IF), mRNA | R.RTM*GYQDFADVVCYTQK.A                | 3 | 2.38 | 0.17 | -3.28 |
| IPI00872555 | cDNA FLJ76262, highly similar to Homo sapiens I factor (complement) (IF), mRNA | R.SFPTYCQQK.S                         | 2 | 1.27 | 0.05 | -2.44 |
| IPI00872555 | cDNA FLJ76262, highly similar to Homo sapiens I factor (complement) (IF), mRNA | R.TM*GYQDFADVVCYTQK.A                 | 2 | 6.07 | 0.65 | -3.11 |
| IPI00872555 | cDNA FLJ76262, highly similar to Homo sapiens I factor (complement) (IF), mRNA | R.TM*GYQDFADVVCYTQK.A                 | 3 | 5.00 | 0.37 | -3.35 |
| IPI00872555 | cDNA FLJ76262, highly similar to Homo sapiens I factor (complement) (IF), mRNA | R.TM*GYQDFADVVCYTQKADSPM*DDFFQCVNGK.Y | 3 | 3.89 | 0.39 | -2.50 |
| IPI00872555 | cDNA FLJ76262, highly similar to Homo sapiens I factor (complement) (IF), mRNA | R.VFSLQWGEVK.L                        | 1 | 2.27 | 0.19 | -2.59 |
| IPI00872555 | cDNA FLJ76262, highly similar to Homo sapiens I factor (complement) (IF), mRNA | R.VFSLQWGEVK.L                        | 2 | 3.57 | 0.32 | -4.06 |
| IPI00872555 | cDNA FLJ76262, highly similar to Homo sapiens I factor (complement) (IF), mRNA | R.YQIWTTVVDWIHPDLKR.I                 | 3 | 2.94 | 0.32 | -3.30 |
| IPI00872555 | cDNA FLJ76262, highly similar to Homo sapiens I factor (complement) (IF), mRNA | R.YQIWTTVVDWIHPDLKR.I                 | 4 | 3.04 | 0.21 | -3.07 |
| IPI00872555 | cDNA FLJ76262, highly similar to Homo sapiens I factor (complement) (IF), mRNA | V.TYTSQEDLVEKK.C                      | 2 | 3.32 | 0.36 | -3.06 |
| IPI00872739 | Uncharacterized protein C18orf2                                                | K.NEPSQWQDLTSTSFKKM*.Q                | 2 | 3.23 | 0.13 | -0.39 |
| IPI00872861 | PTD016 protein                                                                 | R.QTCM*QHITGISLGIGLLTTFM*YANK.S       | 3 | 3.24 | 0.12 | -4.54 |
| IPI00873344 | N8 protein long isoform (Fragment)                                             | -.M*TPRESAPGR.G                       | 2 | 1.74 | 0.16 | -2.61 |
| IPI00873344 | N8 protein long isoform (Fragment)                                             | R.ELAKVEEEIQTLSQVLA.AK.E              | 3 | 2.96 | 0.28 | -6.74 |
| IPI00873740 | Uncharacterized protein ENSP00000383832 (Fragment)                             | R.IHTGEKPYACRDYGKFTTHSTSLTK.H         | 4 | 2.50 | 0.20 | -8.74 |

|             |                                                           |                                 |   |      |      |       |
|-------------|-----------------------------------------------------------|---------------------------------|---|------|------|-------|
| IPI00873774 | Uncharacterized protein ENSP00000383488 (Fragment)        | K.ECDKAFKKFSSLTEH.K             | 2 | 2.96 | 0.18 | -8.12 |
| IPI00873863 | Brain-derived neurotrophic factor transcript variant 5    | K.VRPNEENNKDADLYTSR.V           | 3 | 3.79 | 0.22 | -2.61 |
| IPI00873863 | Brain-derived neurotrophic factor transcript variant 5    | R.GQGGLAYPGVR.T                 | 2 | 2.82 | 0.29 | 0.23  |
| IPI00873863 | Brain-derived neurotrophic factor transcript variant 5    | R.THGTLESVNGPK.A                | 2 | 3.45 | 0.42 | -3.54 |
| IPI00874023 | Uncharacterized protein ENSP00000379699                   | K.SVTRGSSVLLQTNLPCVNTSISNIYR.N  | 3 | 2.38 | 0.08 | -8.10 |
| IPI00874156 | Isoform 1 of Ubiquitin thioesterase OTUB1                 | R.AFGFSHLEALLDDSKELQR.F         | 3 | 3.82 | 0.39 | -2.72 |
| IPI00877029 | FGA protein                                               | A.DSGEGDFLAEGGGVR.G             | 2 | 5.20 | 0.44 | -6.02 |
| IPI00877029 | FGA protein                                               | D.SGEGDFLAEGGGVR.G              | 2 | 4.59 | 0.33 | -2.03 |
| IPI00877029 | FGA protein                                               | K.DSHSLTTNIM*EILR.G             | 3 | 3.52 | 0.16 | -1.25 |
| IPI00877029 | FGA protein                                               | K.GLIDEVNQDFTNR.I               | 2 | 3.96 | 0.41 |       |
| IPI00877029 | FGA protein                                               | K.LKNLFEYQK.N                   | 2 | 2.74 | 0.27 |       |
| IPI00877029 | FGA protein                                               | K.NNKDSHSLTTNIM*EILR.G          | 2 | 5.01 | 0.38 |       |
| IPI00877029 | FGA protein                                               | K.NSLFEYQK.N                    | 1 | 2.42 | 0.12 |       |
| IPI00877029 | FGA protein                                               | R.GDFSSANNR.D                   | 2 | 2.22 | 0.13 |       |
| IPI00877029 | FGA protein                                               | R.GDFSSANNRDNTYNR.V             | 2 | 2.37 | 0.17 |       |
| IPI00877029 | FGA protein                                               | R.M*KGLIDEVNQDFTNR.I            | 2 | 3.76 | 0.24 |       |
| IPI00877029 | FGA protein                                               | R.M*KGLIDEVNQDFTNR.I            | 3 | 4.38 | 0.16 |       |
| IPI00877029 | FGA protein                                               | R.MKGLIDEVNQDFTNR.I             | 3 | 3.99 | 0.21 |       |
| IPI00877029 | FGA protein                                               | T.ADSGEGDFLAEGGGVR.G            | 2 | 4.92 | 0.40 | -5.07 |
| IPI00877084 | Isoform 1 of Coiled-coil domain-containing protein 144C   | R.SGDVPGVEHVLVPGDTGVDKRDR.K     | 2 | 2.14 | 0.08 | 2.94  |
| IPI00877169 | calcium/calmodulin-dependent protein kinase IIA isoform 2 | K.FYFENLLSK.N                   | 2 | 3.14 | 0.28 | -2.24 |
| IPI00877169 | calcium/calmodulin-dependent protein kinase IIA isoform 2 | K.ICDPGLTSFEPEALGNLVEGM*DFHK.F  | 3 | 3.90 | 0.37 | -2.79 |
| IPI00877169 | calcium/calmodulin-dependent protein kinase IIA isoform 2 | K.ITEQLIEAINNGDFEAYTK.I         | 3 | 4.35 | 0.31 | -3.32 |
| IPI00877169 | calcium/calmodulin-dependent protein kinase IIA isoform 2 | K.LFEELGK.Q                     | 2 | 2.14 | 0.07 | -3.69 |
| IPI00877169 | calcium/calmodulin-dependent protein kinase IIA isoform 2 | K.M*CDPGM*TAFEPEALGNLVEGLDFHR.F | 3 | 4.50 | 0.50 | -3.24 |
| IPI00877169 | calcium/calmodulin-dependent protein kinase IIA isoform 2 | K.VTEQLIEAISNGDFESYTK.M         | 2 | 5.97 | 0.57 | -4.66 |
| IPI00877169 | calcium/calmodulin-dependent protein kinase IIA isoform 2 | K.VTEQLIEAISNGDFESYTK.M         | 3 | 5.85 | 0.50 | -4.12 |
| IPI00877169 | calcium/calmodulin-dependent protein kinase IIA isoform 2 | R.FYFENLWSR.N                   | 1 | 2.36 | 0.22 | -1.71 |

|             |                                                           |                                               |   |      |      |       |
|-------------|-----------------------------------------------------------|-----------------------------------------------|---|------|------|-------|
| IPI00877169 | calcium/calmodulin-dependent protein kinase IIA isoform 2 | R.FYFENLWSR.N                                 | 2 | 3.68 | 0.37 | -2.33 |
| IPI00877169 | calcium/calmodulin-dependent protein kinase IIA isoform 2 | R.ITQYLDAGGIPR.T                              | 2 | 3.78 | 0.41 | -2.49 |
| IPI00877169 | calcium/calmodulin-dependent protein kinase IIA isoform 2 | R.LHDSISEEGHHYLIFDLVTGGELFEDIVAR.E            | 3 | 6.18 | 0.44 | -3.84 |
| IPI00877169 | calcium/calmodulin-dependent protein kinase IIA isoform 2 | R.LHDSISEEGHHYLIFDLVTGGELFEDIVAR.E            | 4 | 3.61 | 0.32 | -2.23 |
| IPI00877169 | calcium/calmodulin-dependent protein kinase IIA isoform 2 | R.LHDSISEEGHHYLIFDLVTGGELFEDIVAR.E            | 5 | 4.15 | 0.28 | -2.04 |
| IPI00877169 | calcium/calmodulin-dependent protein kinase IIA isoform 2 | R.LTQYIDGQGRPR.T                              | 2 | 2.94 | 0.17 | -3.26 |
| IPI00877169 | calcium/calmodulin-dependent protein kinase IIA isoform 2 | R.SGAPSVLPH.-                                 | 2 | 2.10 | 0.18 | -4.18 |
| IPI00877615 | 15 kDa protein                                            | K.GSSPLPPLLMGMNDEKYENSLK.I                    | 3 | 3.00 | 0.09 | -8.94 |
| IPI00877800 | 32 kDa protein                                            | R.ELNM*AELALYVAVCLSILLSK.T                    | 3 | 3.15 | 0.16 | -4.44 |
| IPI00878436 | 24 kDa protein                                            | K.RVPVIPEKR.G                                 | 2 | 1.86 | 0.06 | -6.55 |
| IPI00878511 | 45 kDa protein                                            | K.EGAICNAHAPSGGGLSGFSPDSFCSCYYGSTPVARKKRFAK.C | 4 | 3.09 | 0.16 | -5.10 |
| IPI00878517 | 56 kDa protein                                            | A.DLPSLAADFVESKDVCK.N                         | 1 | 3.67 | 0.21 |       |
| IPI00878517 | 56 kDa protein                                            | A.DLPSLAADFVESKDVCK.N                         | 2 | 5.26 | 0.48 |       |
| IPI00878517 | 56 kDa protein                                            | A.KVFDEFKPLVEEPQNLK.Q                         | 3 | 6.62 | 0.37 |       |
| IPI00878517 | 56 kDa protein                                            | C.FSALEVDETYVVK.E                             | 2 | 4.90 | 0.32 |       |
| IPI00878517 | 56 kDa protein                                            | C.FSALEVDETYVPKEFNAETFTFHADICTLSEK.E          | 3 | 6.45 | 0.49 |       |
| IPI00878517 | 56 kDa protein                                            | C.FSALEVDETYVPKEFNAETFTFHADICTLSEKER.Q        | 3 | 6.06 | 0.42 |       |
| IPI00878517 | 56 kDa protein                                            | C.IAEVENDEM*PADLPSLAADFVESK.D                 | 2 | 5.54 | 0.49 |       |
| IPI00878517 | 56 kDa protein                                            | D.LPSLAADFVESKDVCK.N                          | 1 | 4.13 | 0.38 |       |
| IPI00878517 | 56 kDa protein                                            | D.VFLGM*FLYEYAR.R                             | 2 | 3.66 | 0.43 | -4.13 |
| IPI00878517 | 56 kDa protein                                            | E.FAEVSKLVTDLTK.V                             | 2 | 4.99 | 0.38 |       |
| IPI00878517 | 56 kDa protein                                            | E.MPADLPSLAADFVESK.D                          | 1 | 4.14 | 0.34 |       |
| IPI00878517 | 56 kDa protein                                            | E.PQNLIKQNCLEFQQLGEYK.F                       | 2 | 5.83 | 0.50 |       |
| IPI00878517 | 56 kDa protein                                            | E.PQNLIKQNCLEFQQLGEYKFNALLVR.Y                | 3 | 7.04 | 0.46 |       |
| IPI00878517 | 56 kDa protein                                            | E.TFTFHADICTLSEKER.Q                          | 2 | 4.95 | 0.39 |       |
| IPI00878517 | 56 kDa protein                                            | E.VENDEM*PADLPSLAADFVESK.D                    | 2 | 5.73 | 0.50 |       |
| IPI00878517 | 56 kDa protein                                            | H.CIAEVENDEM*PADLPSLAADFVESKDVCK.N            | 3 | 5.79 | 0.36 |       |
| IPI00878517 | 56 kDa protein                                            | K.AACLLPKLDELDEGK.A                           | 1 | 3.62 | 0.15 |       |
| IPI00878517 | 56 kDa protein                                            | K.AACLLPKLDELDEGK.A                           | 2 | 4.01 | 0.24 |       |
| IPI00878517 | 56 kDa protein                                            | K.AACLLPKLDELDEGK.A                           | 3 | 3.95 | 0.30 |       |
| IPI00878517 | 56 kDa protein                                            | K.AACLLPKLDELDEGKASSAK.Q                      | 2 | 4.50 | 0.35 |       |
| IPI00878517 | 56 kDa protein                                            | K.AACLLPKLDELDEGKASSAK.Q                      | 3 | 4.06 | 0.27 |       |
| IPI00878517 | 56 kDa protein                                            | K.AAFTECCQAADK.A                              | 1 | 3.41 | 0.45 |       |
| IPI00878517 | 56 kDa protein                                            | K.AAFTECCQAADK.A                              | 2 | 3.99 | 0.38 |       |
| IPI00878517 | 56 kDa protein                                            | K.AAFTECCQAADKAACLLPK.L                       | 2 | 5.70 | 0.50 |       |

|             |                |                                        |   |      |      |       |
|-------------|----------------|----------------------------------------|---|------|------|-------|
| IPI00878517 | 56 kDa protein | K.AAFTECCQAADKAACLLPK.L                | 3 | 5.42 | 0.42 |       |
| IPI00878517 | 56 kDa protein | K.AAFTECCQAADKAACLLPKLDEL.R.D          | 3 | 5.75 | 0.39 |       |
| IPI00878517 | 56 kDa protein | K.AAFTECCQAADKAACLLPKLDEL.RDEGK.A      | 2 | 4.50 | 0.37 |       |
| IPI00878517 | 56 kDa protein | K.AAFTECCQAADKAACLLPKLDEL.RDEGK.A      | 3 | 5.24 | 0.37 |       |
| IPI00878517 | 56 kDa protein | K.AAFTECCQAADKAACLLPKLDEL.RDEGKASSAK.Q | 3 | 6.45 | 0.51 |       |
| IPI00878517 | 56 kDa protein | K.ADDKETCFAEEGKK.L                     | 3 | 4.64 | 0.28 |       |
| IPI00878517 | 56 kDa protein | K.ADDKETCFAEEGKKLVAASQAALGL.-          | 3 | 4.07 | 0.24 |       |
| IPI00878517 | 56 kDa protein | K.AEFAEVSK.L                           | 1 | 2.70 | 0.11 |       |
| IPI00878517 | 56 kDa protein | K.AEFAEVSK.L                           | 2 | 2.32 | 0.06 | -2.27 |
| IPI00878517 | 56 kDa protein | K.AEFAEVSKLVTDLTK.V                    | 1 | 3.71 | 0.40 |       |
| IPI00878517 | 56 kDa protein | K.AEFAEVSKLVTDLTK.V                    | 2 | 4.59 | 0.44 | -3.50 |
| IPI00878517 | 56 kDa protein | K.AEFAEVSKLVTDLTK.V                    | 3 | 3.57 | 0.24 | -4.12 |
| IPI00878517 | 56 kDa protein | K.ATKEQLKAVM*DDFAAFVEK.C               | 2 | 6.27 | 0.48 |       |
| IPI00878517 | 56 kDa protein | K.ATKEQLKAVM*DDFAAFVEK.C               | 3 | 5.05 | 0.42 |       |
| IPI00878517 | 56 kDa protein | K.ATKEQLKAVMDDFAAFVEK.C                | 2 | 6.09 | 0.52 |       |
| IPI00878517 | 56 kDa protein | K.ATKEQLKAVMDDFAAFVEK.C                | 3 | 4.63 | 0.36 |       |
| IPI00878517 | 56 kDa protein | K.AVM*DDFAAFVEK.C                      | 1 | 3.46 | 0.41 |       |
| IPI00878517 | 56 kDa protein | K.AVM*DDFAAFVEK.C                      | 2 | 2.72 | 0.20 | -4.62 |
| IPI00878517 | 56 kDa protein | K.AVM*DDFAAFVEK.C                      | 3 | 4.27 | 0.17 |       |
| IPI00878517 | 56 kDa protein | K.AVMDDFAAFVEK.C                       | 1 | 3.38 | 0.39 |       |
| IPI00878517 | 56 kDa protein | K.AVMDDFAAFVEK.C                       | 2 | 4.72 | 0.45 |       |
| IPI00878517 | 56 kDa protein | K.AVMDDFAAFVEK.C                       | 3 | 4.80 | 0.31 |       |
| IPI00878517 | 56 kDa protein | K.AVMDDFAAFVEKCKC.A                    | 2 | 3.36 | 0.24 |       |
| IPI00878517 | 56 kDa protein | K.CASLQKFGGER.A                        | 2 | 3.03 | 0.18 |       |
| IPI00878517 | 56 kDa protein | K.CCAAADPHECYAK.V                      | 1 | 3.25 | 0.49 |       |
| IPI00878517 | 56 kDa protein | K.CCAAADPHECYAK.V                      | 2 | 5.15 | 0.46 |       |
| IPI00878517 | 56 kDa protein | K.CCAAADPHECYAKVFDEFKPLVEEPQNLIK.Q     | 3 | 5.66 | 0.38 |       |
| IPI00878517 | 56 kDa protein | K.CCTESLVNR.R                          | 1 | 3.26 | 0.42 |       |
| IPI00878517 | 56 kDa protein | K.CCTESLVNR.R                          | 2 | 3.78 | 0.39 |       |
| IPI00878517 | 56 kDa protein | K.CCTESLVNRRPCFSALEVDETYVPK.E          | 3 | 4.01 | 0.32 |       |
| IPI00878517 | 56 kDa protein | K.DLGEENFK.A                           | 1 | 2.48 | 0.19 |       |
| IPI00878517 | 56 kDa protein | K.DLGEENFK.A                           | 2 | 2.99 | 0.11 |       |
| IPI00878517 | 56 kDa protein | K.DVCKNYAEAK.D                         | 1 | 2.80 | 0.28 |       |
| IPI00878517 | 56 kDa protein | K.DVCKNYAEAK.D                         | 2 | 3.15 | 0.28 |       |
| IPI00878517 | 56 kDa protein | K.DVCKNYAEAK.D                         | 3 | 2.72 | 0.23 |       |
| IPI00878517 | 56 kDa protein | K.DVCKNYAEAKDVFLGM*FLYEYAR.R           | 2 | 5.81 | 0.52 |       |
| IPI00878517 | 56 kDa protein | K.DVCKNYAEAKDVFLGM*FLYEYAR.R           | 3 | 6.16 | 0.51 |       |
| IPI00878517 | 56 kDa protein | K.DVCKNYAEAKDVFLGMFLYEYAR.R            | 2 | 5.40 | 0.53 |       |
| IPI00878517 | 56 kDa protein | K.DVCKNYAEAKDVFLGMFLYEYAR.R            | 3 | 5.99 | 0.53 |       |
| IPI00878517 | 56 kDa protein | K.DVFLGM*FLYEYAR.R                     | 2 | 3.99 | 0.47 | -5.06 |
| IPI00878517 | 56 kDa protein | K.DVFLGM*FLYEYAR.R                     | 3 | 5.36 | 0.36 |       |
| IPI00878517 | 56 kDa protein | K.DVFLGMFLYEYAR.R                      | 1 | 4.45 | 0.40 |       |

|             |                |                                              |   |      |      |       |
|-------------|----------------|----------------------------------------------|---|------|------|-------|
| IPI00878517 | 56 kDa protein | K.DVFLGMFLYEYAR.R                            | 2 | 3.34 | 0.41 | -5.62 |
| IPI00878517 | 56 kDa protein | K.DVFLGMFLYEYAR.R                            | 3 | 4.99 | 0.43 |       |
| IPI00878517 | 56 kDa protein | K.ECCEKPLLEK.S                               | 1 | 2.75 | 0.15 |       |
| IPI00878517 | 56 kDa protein | K.ECCEKPLLEK.S                               | 2 | 2.89 | 0.28 |       |
| IPI00878517 | 56 kDa protein | K.EFNAETTFHADICTLSEK.E                       | 2 | 6.58 | 0.56 |       |
| IPI00878517 | 56 kDa protein | K.EFNAETTFHADICTLSEK.E                       | 3 | 3.55 | 0.39 |       |
| IPI00878517 | 56 kDa protein | K.EFNAETTFHADICTLSEKER.Q                     | 2 | 5.54 | 0.57 |       |
| IPI00878517 | 56 kDa protein | K.EFNAETTFHADICTLSEKER.Q                     | 3 | 5.35 | 0.42 |       |
| IPI00878517 | 56 kDa protein | K.EQLKAVM*DDFAAFVEK.C                        | 1 | 3.76 | 0.46 |       |
| IPI00878517 | 56 kDa protein | K.EQLKAVM*DDFAAFVEK.C                        | 2 | 5.62 | 0.47 |       |
| IPI00878517 | 56 kDa protein | K.EQLKAVM*DDFAAFVEK.C                        | 3 | 3.90 | 0.30 |       |
| IPI00878517 | 56 kDa protein | K.EQLKAVMDDFAAFVEK.C                         | 1 | 5.01 | 0.49 |       |
| IPI00878517 | 56 kDa protein | K.EQLKAVMDDFAAFVEK.C                         | 2 | 5.14 | 0.48 |       |
| IPI00878517 | 56 kDa protein | K.EQLKAVMDDFAAFVEK.C                         | 3 | 4.60 | 0.44 |       |
| IPI00878517 | 56 kDa protein | K.FQNALLVR.Y                                 | 1 | 1.76 | 0.09 | -1.15 |
| IPI00878517 | 56 kDa protein | K.FQNALLVR.Y                                 | 2 | 3.03 | 0.15 | -2.03 |
| IPI00878517 | 56 kDa protein | K.HKPKATKEQLK.A                              | 3 | 2.92 | 0.14 |       |
| IPI00878517 | 56 kDa protein | K.KLVAASQAALGL.-                             | 1 | 3.00 | 0.31 |       |
| IPI00878517 | 56 kDa protein | K.KLVAASQAALGL.-                             | 2 | 3.69 | 0.36 |       |
| IPI00878517 | 56 kDa protein | K.KQTALVELVK.H                               | 1 | 2.79 | 0.27 |       |
| IPI00878517 | 56 kDa protein | K.KQTALVELVK.H                               | 2 | 3.26 | 0.24 |       |
| IPI00878517 | 56 kDa protein | K.KVPQVSTPTLVEVSR.N                          | 1 | 4.15 | 0.48 |       |
| IPI00878517 | 56 kDa protein | K.KVPQVSTPTLVEVSR.N                          | 2 | 3.59 | 0.45 | -4.27 |
| IPI00878517 | 56 kDa protein | K.KVPQVSTPTLVEVSR.N                          | 3 | 4.86 | 0.49 | -3.58 |
| IPI00878517 | 56 kDa protein | K.KVPQVSTPTLVEVSRNLGK.V                      | 2 | 3.37 | 0.40 |       |
| IPI00878517 | 56 kDa protein | K.KVPQVSTPTLVEVSRNLGK.V                      | 3 | 3.70 | 0.34 |       |
| IPI00878517 | 56 kDa protein | K.LDELRDEGK.A                                | 2 | 2.16 | 0.06 | -1.65 |
| IPI00878517 | 56 kDa protein | K.LDELRDEGKASSAK.Q                           | 1 | 2.41 | 0.10 |       |
| IPI00878517 | 56 kDa protein | K.LDELRDEGKASSAK.Q                           | 2 | 4.30 | 0.40 |       |
| IPI00878517 | 56 kDa protein | K.LDELRDEGKASSAK.Q                           | 3 | 3.23 | 0.39 | -1.52 |
| IPI00878517 | 56 kDa protein | K.LDELRDEGKASSAKQR.L                         | 3 | 4.06 | 0.36 |       |
| IPI00878517 | 56 kDa protein | K.LKECCEKPLLEK.S                             | 1 | 3.16 | 0.24 |       |
| IPI00878517 | 56 kDa protein | K.LKECCEKPLLEK.S                             | 2 | 4.46 | 0.29 |       |
| IPI00878517 | 56 kDa protein | K.LKECCEKPLLEK.S                             | 3 | 4.40 | 0.22 |       |
| IPI00878517 | 56 kDa protein | K.LKECCEKPLLEKSHCIAEVENDEM*PADLPSLAADFVESK.D | 3 | 3.46 | 0.15 |       |
| IPI00878517 | 56 kDa protein | K.LKECCEKPLLEKSHCIAEVENDEMPADLPSLAADFVESK.D  | 3 | 3.17 | 0.11 |       |
| IPI00878517 | 56 kDa protein | K.LVAASQAALGL.-                              | 2 | 3.53 | 0.32 | -2.35 |
| IPI00878517 | 56 kDa protein | K.LVTDLTK.V                                  | 1 | 2.20 | 0.11 |       |
| IPI00878517 | 56 kDa protein | K.LVTDLTKVHTECCHGDILLECADDR.A                | 2 | 4.79 | 0.46 |       |
| IPI00878517 | 56 kDa protein | K.LVTDLTKVHTECCHGDILLECADDR.A                | 3 | 7.23 | 0.53 |       |
| IPI00878517 | 56 kDa protein | K.LVTDLTKVHTECCHGDILLECADDRADLAK.Y           | 2 | 4.02 | 0.42 |       |
| IPI00878517 | 56 kDa protein | K.LVTDLTKVHTECCHGDILLECADDRADLAK.Y           | 3 | 5.08 | 0.30 |       |

|             |                |                                            |   |      |      |       |
|-------------|----------------|--------------------------------------------|---|------|------|-------|
| IPI00878517 | 56 kDa protein | K.NYAEAKDVFLGM*FLYEYAR.R                   | 2 | 5.71 | 0.54 |       |
| IPI00878517 | 56 kDa protein | K.NYAEAKDVFLGM*FLYEYAR.R                   | 3 | 3.08 | 0.08 | -4.06 |
| IPI00878517 | 56 kDa protein | K.NYAEAKDVFLGMFLYEYAR.R                    | 2 | 5.95 | 0.48 |       |
| IPI00878517 | 56 kDa protein | K.NYAEAKDVFLGMFLYEYAR.R                    | 3 | 4.91 | 0.36 |       |
| IPI00878517 | 56 kDa protein | K.QNCELFEQLGEYK.F                          | 1 | 3.85 | 0.33 |       |
| IPI00878517 | 56 kDa protein | K.QNCELFEQLGEYK.F                          | 2 | 3.52 | 0.44 | -2.05 |
| IPI00878517 | 56 kDa protein | K.QNCELFEQLGEYK.F                          | 3 | 4.54 | 0.25 |       |
| IPI00878517 | 56 kDa protein | K.QNCELFEQLGEYKFNALLVR.Y                   | 2 | 5.42 | 0.38 |       |
| IPI00878517 | 56 kDa protein | K.QNCELFEQLGEYKFNALLVR.Y                   | 3 | 6.95 | 0.48 |       |
| IPI00878517 | 56 kDa protein | K.QTALVELVK.H                              | 1 | 1.96 | 0.13 |       |
| IPI00878517 | 56 kDa protein | K.QTALVELVK.H                              | 2 | 1.80 | 0.10 | -1.82 |
| IPI00878517 | 56 kDa protein | K.RM*PCAEDYLSVVLNQLCVLHEK.T                | 2 | 4.36 | 0.39 |       |
| IPI00878517 | 56 kDa protein | K.RM*PCAEDYLSVVLNQLCVLHEK.T                | 3 | 7.25 | 0.47 |       |
| IPI00878517 | 56 kDa protein | K.RM*PCAEDYLSVVLNQLCVLHEKTPVSDR.V          | 3 | 4.69 | 0.39 |       |
| IPI00878517 | 56 kDa protein | K.RM*PCAEDYLSVVLNQLCVLHEKTPVSDRVTK.C       | 3 | 4.04 | 0.28 |       |
| IPI00878517 | 56 kDa protein | K.RMPCAEDYLSVVLNQLCVLHEK.T                 | 2 | 5.25 | 0.45 |       |
| IPI00878517 | 56 kDa protein | K.RMPCAEDYLSVVLNQLCVLHEK.T                 | 3 | 6.52 | 0.47 |       |
| IPI00878517 | 56 kDa protein | K.RMPCAEDYLSVVLNQLCVLHEKTPVSDR.V           | 3 | 5.15 | 0.32 |       |
| IPI00878517 | 56 kDa protein | K.SHCIAEVENDEM*PAD.L                       | 2 | 5.40 | 0.43 |       |
| IPI00878517 | 56 kDa protein | K.SHCIAEVENDEM*PADLPSLAADFVESK.D           | 2 | 6.10 | 0.55 |       |
| IPI00878517 | 56 kDa protein | K.SHCIAEVENDEM*PADLPSLAADFVESK.D           | 3 | 6.12 | 0.57 | -4.57 |
| IPI00878517 | 56 kDa protein | K.SHCIAEVENDEM*PADLPSLAADFVESKD.V          | 3 | 5.94 | 0.29 |       |
| IPI00878517 | 56 kDa protein | K.SHCIAEVENDEM*PADLPSLAADFVESKDVCK.N       | 2 | 5.61 | 0.60 |       |
| IPI00878517 | 56 kDa protein | K.SHCIAEVENDEM*PADLPSLAADFVESKDVCK.N       | 3 | 7.63 | 0.56 |       |
| IPI00878517 | 56 kDa protein | K.SHCIAEVENDEM*PADLPSLAADFVESKDVCKNYAEAK.D | 3 | 6.65 | 0.57 |       |
| IPI00878517 | 56 kDa protein | K.SHCIAEVENDEMPADLPSLAADFVESK.D            | 2 | 6.14 | 0.54 |       |
| IPI00878517 | 56 kDa protein | K.SHCIAEVENDEMPADLPSLAADFVESK.D            | 3 | 6.62 | 0.53 |       |
| IPI00878517 | 56 kDa protein | K.SHCIAEVENDEMPADLPSLAADFVESKDVCK.N        | 2 | 5.73 | 0.58 |       |
| IPI00878517 | 56 kDa protein | K.SHCIAEVENDEMPADLPSLAADFVESKDVCK.N        | 3 | 7.27 | 0.55 |       |
| IPI00878517 | 56 kDa protein | K.SHCIAEVENDEMPADLPSLAADFVESKDVCKNYAEAK.D  | 3 | 7.14 | 0.51 |       |
| IPI00878517 | 56 kDa protein | K.TPVSDRVTK.C                              | 2 | 2.16 | 0.06 | -2.14 |
| IPI00878517 | 56 kDa protein | K.TPVSDRVTKCCTESLVNR.R                     | 3 | 4.31 | 0.40 |       |
| IPI00878517 | 56 kDa protein | K.TYETTLEK.C                               | 1 | 1.93 | 0.10 |       |
| IPI00878517 | 56 kDa protein | K.TYETTLEK.C                               | 2 | 2.62 | 0.23 |       |
| IPI00878517 | 56 kDa protein | K.TYETTLEKCCAAADPHECYAK.V                  | 2 | 5.25 | 0.50 |       |
| IPI00878517 | 56 kDa protein | K.TYETTLEKCCAAADPHECYAK.V                  | 3 | 5.13 | 0.32 |       |
| IPI00878517 | 56 kDa protein | K.VFDEFKPLVEEPQNLIK.Q                      | 2 | 4.55 | 0.39 | -5.33 |
| IPI00878517 | 56 kDa protein | K.VFDEFKPLVEEPQNLIK.Q                      | 3 | 4.84 | 0.32 | -4.89 |
| IPI00878517 | 56 kDa protein | K.VFDEFKPLVEEPQNLIKQNCELFEQLGEYK.F         | 3 | 7.59 | 0.48 |       |
| IPI00878517 | 56 kDa protein | K.VFDEFKPLVEEPQNLIKQNCELFEQLGEYKFNALLVR.Y  | 3 | 6.11 | 0.54 |       |
| IPI00878517 | 56 kDa protein | K.VHTECCHGDLLCADDR.A                       | 2 | 6.67 | 0.60 |       |
| IPI00878517 | 56 kDa protein | K.VHTECCHGDLLCADDR.A                       | 3 | 5.51 | 0.45 |       |

|             |                |                                       |   |      |      |       |
|-------------|----------------|---------------------------------------|---|------|------|-------|
| IPI00878517 | 56 kDa protein | K.VHTECCHGDLLCADDRADLAK.Y             | 2 | 5.13 | 0.43 |       |
| IPI00878517 | 56 kDa protein | K.VHTECCHGDLLCADDRADLAK.Y             | 3 | 6.44 | 0.50 |       |
| IPI00878517 | 56 kDa protein | K.VHTECCHGDLLCADDRADLAKYICENQDSISSK.L | 3 | 4.92 | 0.43 |       |
| IPI00878517 | 56 kDa protein | K.VPQVSTPTLVEVSR.N                    | 1 | 3.38 | 0.40 |       |
| IPI00878517 | 56 kDa protein | K.VPQVSTPTLVEVSR.N                    | 2 | 3.92 | 0.45 |       |
| IPI00878517 | 56 kDa protein | K.VPQVSTPTLVEVSR.N                    | 3 | 3.70 | 0.29 |       |
| IPI00878517 | 56 kDa protein | K.VPQVSTPTLVEVSRNLGK.V                | 3 | 2.66 | 0.20 |       |
| IPI00878517 | 56 kDa protein | K.YICENQDSISSK.L                      | 1 | 3.56 | 0.39 |       |
| IPI00878517 | 56 kDa protein | K.YICENQDSISSK.L                      | 2 | 1.96 | 0.16 | -2.00 |
| IPI00878517 | 56 kDa protein | K.YICENQDSISSK.L                      | 3 | 2.98 | 0.10 |       |
| IPI00878517 | 56 kDa protein | K.YICENQDSISSKLE                      | 2 | 4.73 | 0.43 |       |
| IPI00878517 | 56 kDa protein | K.YICENQDSISSKLEKCEKPLLEK.S           | 3 | 5.80 | 0.27 |       |
| IPI00878517 | 56 kDa protein | K.YLYEIAR.R                           | 1 | 2.31 | 0.18 |       |
| IPI00878517 | 56 kDa protein | K.YLYEIAR.R                           | 2 | 3.11 | 0.26 |       |
| IPI00878517 | 56 kDa protein | L.FEQLGEYKFNALLVR.Y                   | 2 | 5.33 | 0.32 |       |
| IPI00878517 | 56 kDa protein | L.IKQNCLEFQLEGEYK.F                   | 2 | 4.99 | 0.28 |       |
| IPI00878517 | 56 kDa protein | L.PSLAADFVESKDVCK.N                   | 1 | 4.05 | 0.37 |       |
| IPI00878517 | 56 kDa protein | L.PSLAADFVESKDVCK.N                   | 2 | 5.36 | 0.39 |       |
| IPI00878517 | 56 kDa protein | M.PADLPSLAADFVESK.D                   | 1 | 4.03 | 0.52 |       |
| IPI00878517 | 56 kDa protein | M.PADLPSLAADFVESK.D                   | 2 | 5.47 | 0.47 |       |
| IPI00878517 | 56 kDa protein | M.PADLPSLAADFVESKDVCK.N               | 2 | 6.02 | 0.51 |       |
| IPI00878517 | 56 kDa protein | M.PCAEDYLSVVLNQLCVLHEK.T              | 3 | 6.35 | 0.43 |       |
| IPI00878517 | 56 kDa protein | P.CAEDYLSVVLNQLCVLHEK.T               | 2 | 5.18 | 0.36 |       |
| IPI00878517 | 56 kDa protein | P.CAEDYLSVVLNQLCVLHEK.T               | 3 | 6.03 | 0.45 |       |
| IPI00878517 | 56 kDa protein | P.CFSALEVDETYVPK.E                    | 2 | 5.56 | 0.47 |       |
| IPI00878517 | 56 kDa protein | R.ADLAKYICENQDSISSK.L                 | 2 | 5.03 | 0.43 |       |
| IPI00878517 | 56 kDa protein | R.AFKAWAVAR.L                         | 1 | 2.21 | 0.23 |       |
| IPI00878517 | 56 kDa protein | R.AFKAWAVAR.L                         | 2 | 3.16 | 0.26 |       |
| IPI00878517 | 56 kDa protein | R.DAHKSEVAHR.F                        | 2 | 2.69 | 0.26 |       |
| IPI00878517 | 56 kDa protein | R.DEGKASSAK.Q                         | 1 | 2.24 | 0.15 |       |
| IPI00878517 | 56 kDa protein | R.FKDLGEENFK.A                        | 1 | 3.27 | 0.31 |       |
| IPI00878517 | 56 kDa protein | R.FKDLGEENFK.A                        | 2 | 3.67 | 0.24 |       |
| IPI00878517 | 56 kDa protein | R.FKDLGEENFK.A                        | 3 | 2.78 | 0.18 | -3.67 |
| IPI00878517 | 56 kDa protein | R.FPKAEFAEVSK.L                       | 1 | 3.28 | 0.29 |       |
| IPI00878517 | 56 kDa protein | R.FPKAEFAEVSK.L                       | 2 | 3.86 | 0.31 |       |
| IPI00878517 | 56 kDa protein | R.FPKAEFAEVSK.L                       | 3 | 4.48 | 0.30 |       |
| IPI00878517 | 56 kDa protein | R.FPKAEFAEVSKLVTDLTK.V                | 2 | 6.07 | 0.48 |       |
| IPI00878517 | 56 kDa protein | R.FPKAEFAEVSKLVTDLTK.V                | 3 | 5.52 | 0.39 |       |
| IPI00878517 | 56 kDa protein | R.HPDYSVLLLLR.L                       | 1 | 3.42 | 0.37 |       |
| IPI00878517 | 56 kDa protein | R.HPDYSVLLLLR.L                       | 2 | 2.94 | 0.36 |       |
| IPI00878517 | 56 kDa protein | R.HPDYSVLLLLR.L                       | 3 | 4.45 | 0.12 |       |
| IPI00878517 | 56 kDa protein | R.HPYFYAPPELLFFAK.R                   | 1 | 4.65 | 0.47 |       |

|             |                |                                           |   |      |      |       |
|-------------|----------------|-------------------------------------------|---|------|------|-------|
| IPI00878517 | 56 kDa protein | R.HPYFYAPELLFFAK.R                        | 2 | 3.11 | 0.35 |       |
| IPI00878517 | 56 kDa protein | R.HPYFYAPELLFFAK.R                        | 3 | 3.33 | 0.28 | -2.89 |
| IPI00878517 | 56 kDa protein | R.HPYFYAPELLFFAKR.Y                       | 3 | 4.41 | 0.36 |       |
| IPI00878517 | 56 kDa protein | R.LAKTYETTLEK.C                           | 1 | 2.80 | 0.23 |       |
| IPI00878517 | 56 kDa protein | R.LAKTYETTLEK.C                           | 2 | 3.39 | 0.31 |       |
| IPI00878517 | 56 kDa protein | R.LAKTYETTLEK.C                           | 3 | 2.39 | 0.11 | 1.05  |
| IPI00878517 | 56 kDa protein | R.LAKTYETTLEKCCAAADPHECYAK.V              | 3 | 5.45 | 0.35 |       |
| IPI00878517 | 56 kDa protein | R.LSQRFPKAEFAEVSK.L                       | 2 | 3.95 | 0.32 |       |
| IPI00878517 | 56 kDa protein | R.LSQRFPKAEFAEVSK.L                       | 3 | 5.85 | 0.39 |       |
| IPI00878517 | 56 kDa protein | R.LSQRFPKAEFAEVSKLVDTLTK.V                | 3 | 7.14 | 0.47 |       |
| IPI00878517 | 56 kDa protein | R.M*PCAEDYLSVVLNQLCVLHEK.T                | 2 | 5.36 | 0.46 |       |
| IPI00878517 | 56 kDa protein | R.M*PCAEDYLSVVLNQLCVLHEK.T                | 3 | 4.25 | 0.37 | -4.98 |
| IPI00878517 | 56 kDa protein | R.M*PCAEDYLSVVLNQLCVLHEKTPVSDR.V          | 3 | 5.69 | 0.42 |       |
| IPI00878517 | 56 kDa protein | R.M*PCAEDYLSVVLNQLCVLHEKTPVSDRVTK.C       | 3 | 5.84 | 0.48 |       |
| IPI00878517 | 56 kDa protein | R.MPCAEDYLSVVLNQLCVLHEK.T                 | 2 | 5.15 | 0.43 |       |
| IPI00878517 | 56 kDa protein | R.MPCAEDYLSVVLNQLCVLHEK.T                 | 3 | 4.21 | 0.43 | -4.61 |
| IPI00878517 | 56 kDa protein | R.MPCAEDYLSVVLNQLCVLHEKTPVSDR.V           | 3 | 6.18 | 0.50 |       |
| IPI00878517 | 56 kDa protein | R.MPCAEDYLSVVLNQLCVLHEKTPVSDRVTK.C        | 3 | 5.28 | 0.39 |       |
| IPI00878517 | 56 kDa protein | R.PCFSALEVDETYVPK.E                       | 2 | 5.95 | 0.49 |       |
| IPI00878517 | 56 kDa protein | R.QIKKQTALVELVK.H                         | 3 | 2.90 | 0.25 |       |
| IPI00878517 | 56 kDa protein | R.RHPDYSVVLRL.L                           | 2 | 3.78 | 0.40 |       |
| IPI00878517 | 56 kDa protein | R.RHPDYSVVLRL.L                           | 3 | 5.46 | 0.33 |       |
| IPI00878517 | 56 kDa protein | R.RHPYFYAPELLFFAK.R                       | 2 | 4.81 | 0.40 |       |
| IPI00878517 | 56 kDa protein | R.RHPYFYAPELLFFAK.R                       | 3 | 4.26 | 0.32 | -4.29 |
| IPI00878517 | 56 kDa protein | R.RHPYFYAPELLFFAKR.Y                      | 2 | 3.80 | 0.38 |       |
| IPI00878517 | 56 kDa protein | R.RPCFSALEVDETYVPK.E                      | 1 | 3.97 | 0.49 |       |
| IPI00878517 | 56 kDa protein | R.RPCFSALEVDETYVPK.E                      | 2 | 4.52 | 0.40 |       |
| IPI00878517 | 56 kDa protein | R.RPCFSALEVDETYVPK.E                      | 3 | 3.79 | 0.26 |       |
| IPI00878517 | 56 kDa protein | R.RPCFSALEVDETYVPKEFNAETFTFHADICTLSEK.E   | 3 | 6.83 | 0.48 |       |
| IPI00878517 | 56 kDa protein | R.RPCFSALEVDETYVPKEFNAETFTFHADICTLSEKER.Q | 3 | 6.05 | 0.47 |       |
| IPI00878517 | 56 kDa protein | R.VTKCCTESLVNR.R                          | 3 | 3.44 | 0.17 |       |
| IPI00878517 | 56 kDa protein | R.YKAAFTECCQAADK.A                        | 1 | 4.06 | 0.49 |       |
| IPI00878517 | 56 kDa protein | R.YKAAFTECCQAADK.A                        | 2 | 5.28 | 0.45 |       |
| IPI00878517 | 56 kDa protein | R.YKAAFTECCQAADK.A                        | 3 | 4.94 | 0.39 |       |
| IPI00878517 | 56 kDa protein | R.YKAAFTECCQAADKAAACLLPK.L                | 2 | 5.51 | 0.53 |       |
| IPI00878517 | 56 kDa protein | R.YKAAFTECCQAADKAAACLLPK.L                | 3 | 5.35 | 0.47 |       |
| IPI00878517 | 56 kDa protein | R.YKAAFTECCQAADKAAACLLPKLDELDEGK.A        | 3 | 6.90 | 0.49 |       |
| IPI00878517 | 56 kDa protein | R.YKAAFTECCQAADKAAACLLPKLDELDEGKASSAK.Q   | 3 | 6.75 | 0.45 |       |
| IPI00878517 | 56 kDa protein | R.YTKKVPQVSTPTLVEVSR.N                    | 2 | 4.95 | 0.33 |       |
| IPI00878517 | 56 kDa protein | R.YTKKVPQVSTPTLVEVSR.N                    | 3 | 4.84 | 0.39 |       |
| IPI00878517 | 56 kDa protein | V.FDEFKPLVEEPQNLIKQNCLEFQLGQYK.F          | 3 | 5.61 | 0.34 |       |
| IPI00878517 | 56 kDa protein | V.PKEFNAETFTFHADICTLSEK.E                 | 2 | 5.73 | 0.47 |       |



|             |                         |                                          |   |      |      |       |
|-------------|-------------------------|------------------------------------------|---|------|------|-------|
| IPI00878576 | Autotaxin isoform gamma | C.PAGFVRPPLIIFSVDGFR.A                   | 3 | 3.90 | 0.36 | -4.42 |
| IPI00878576 | Autotaxin isoform gamma | F.DYDYDGLHDTEDKIK.Q                      | 2 | 3.46 | 0.44 | -1.88 |
| IPI00878576 | Autotaxin isoform gamma | F.LSNYLTVNDDITLVPGLGR.I                  | 2 | 3.89 | 0.48 | -2.95 |
| IPI00878576 | Autotaxin isoform gamma | I.DKIVGQLM*DGLK.Q                        | 2 | 2.98 | 0.32 | -1.95 |
| IPI00878576 | Autotaxin isoform gamma | I.FDYDYDGLHDTEDKIK.Q                     | 2 | 3.44 | 0.37 | -5.92 |
| IPI00878576 | Autotaxin isoform gamma | K.AAECPAGFVRPPLIIFSVDGFR.A               | 2 | 3.41 | 0.48 | -3.20 |
| IPI00878576 | Autotaxin isoform gamma | K.AAECPAGFVRPPLIIFSVDGFR.A               | 3 | 5.07 | 0.54 | -6.71 |
| IPI00878576 | Autotaxin isoform gamma | K.AGTFFWSVVIPHER.R                       | 2 | 3.88 | 0.50 | -4.30 |
| IPI00878576 | Autotaxin isoform gamma | K.AGTFFWSVVIPHER.R                       | 3 | 3.64 | 0.38 | -3.43 |
| IPI00878576 | Autotaxin isoform gamma | K.AGTFFWSVVIPHERR.I                      | 3 | 2.36 | 0.24 | -5.42 |
| IPI00878576 | Autotaxin isoform gamma | K.CFFQGDHGFNDK.V                         | 2 | 3.96 | 0.46 | -2.89 |
| IPI00878576 | Autotaxin isoform gamma | K.CFFQGDHGFNDK/VNSM*QTVFVGYGPTFK.Y       | 3 | 3.99 | 0.37 | -3.45 |
| IPI00878576 | Autotaxin isoform gamma | K.CFFQGDHGFNDK/VNSM*QTVFVGYGPTFK.Y       | 4 | 3.01 | 0.15 | -4.96 |
| IPI00878576 | Autotaxin isoform gamma | K.IVGQLM*DGLK.Q                          | 1 | 1.92 | 0.16 | -4.37 |
| IPI00878576 | Autotaxin isoform gamma | K.IVGQLM*DGLK.Q                          | 2 | 3.43 | 0.36 | -3.09 |
| IPI00878576 | Autotaxin isoform gamma | K.KPDQHFQPYLK.Q                          | 2 | 3.78 | 0.19 | -4.92 |
| IPI00878576 | Autotaxin isoform gamma | K.KPDQHFQPYLK.Q                          | 3 | 2.76 | 0.20 | -4.13 |
| IPI00878576 | Autotaxin isoform gamma | K.NDKQM*SYGFLFPPYLSSSPEAK.Y              | 2 | 5.27 | 0.57 | -4.39 |
| IPI00878576 | Autotaxin isoform gamma | K.NDKQM*SYGFLFPPYLSSSPEAK.Y              | 3 | 4.41 | 0.46 | -3.41 |
| IPI00878576 | Autotaxin isoform gamma | K.NKLDLNLNR.L                            | 2 | 2.97 | 0.13 | -3.10 |
| IPI00878576 | Autotaxin isoform gamma | K.QAEVSSVPDHLTSCVRPDVR.V                 | 2 | 2.45 | 0.18 | -3.52 |
| IPI00878576 | Autotaxin isoform gamma | K.QGVKAGTFFWSVVIPHER.R                   | 4 | 3.38 | 0.24 | -2.10 |
| IPI00878576 | Autotaxin isoform gamma | K.QM*SYGFLFPPYLSSSPEAK.Y                 | 2 | 4.95 | 0.54 | -4.82 |
| IPI00878576 | Autotaxin isoform gamma | K.QM*SYGFLFPPYLSSSPEAK.Y                 | 3 | 3.71 | 0.15 | -4.41 |
| IPI00878576 | Autotaxin isoform gamma | K.QYVEGSSIPVPTHYYSIITSCLDFTQPADK.C       | 3 | 4.55 | 0.42 | -4.45 |
| IPI00878576 | Autotaxin isoform gamma | K.SYTSCCHDFDELCLK.T                      | 2 | 4.55 | 0.46 | -0.09 |
| IPI00878576 | Autotaxin isoform gamma | K.SYTSCCHDFDELCLK.T                      | 3 | 2.16 | 0.22 | -1.69 |
| IPI00878576 | Autotaxin isoform gamma | K.TFPNLYTLATGLYPESH.G                    | 2 | 3.51 | 0.35 | -3.72 |
| IPI00878576 | Autotaxin isoform gamma | K.TFPNLYTLATGLYPESHGIVGN.S               | 2 | 4.19 | 0.52 | -5.02 |
| IPI00878576 | Autotaxin isoform gamma | K.TFPNLYTLATGLYPESHGIVGNM*YDPVDFATFHLR.G | 3 | 5.63 | 0.50 | -3.56 |
| IPI00878576 | Autotaxin isoform gamma | K.TFPNLYTLATGLYPESHGIVGNM*YDPVDFATFHLR.G | 4 | 2.73 | 0.42 | -4.05 |
| IPI00878576 | Autotaxin isoform gamma | K.TYLHTYESEI.-                           | 1 | 2.74 | 0.38 | -4.10 |
| IPI00878576 | Autotaxin isoform gamma | K.TYLHTYESEI.-                           | 2 | 3.08 | 0.36 | -2.57 |
| IPI00878576 | Autotaxin isoform gamma | K.VNSM*QTVFVGYGPTFK.Y                    | 2 | 4.57 | 0.51 | -4.65 |
| IPI00878576 | Autotaxin isoform gamma | K.YDAFLVTNM*VPM*YPA.F                    | 2 | 4.18 | 0.44 | -1.28 |
| IPI00878576 | Autotaxin isoform gamma | K.YDAFLVTNM*VPM*YPAF.K                   | 2 | 4.11 | 0.56 | -3.03 |
| IPI00878576 | Autotaxin isoform gamma | K.YDAFLVTNM*VPM*YPAFK.R                  | 2 | 5.18 | 0.54 | -5.59 |
| IPI00878576 | Autotaxin isoform gamma | K.YDAFLVTNM*VPM*YPAFK.R                  | 3 | 3.31 | 0.34 | -3.66 |
| IPI00878576 | Autotaxin isoform gamma | K.YDAFLVTNM*VPM*YPAFKR.V                 | 2 | 3.55 | 0.49 | -4.73 |
| IPI00878576 | Autotaxin isoform gamma | K.YDAFLVTNM*VPM*YPAFKR.V                 | 3 | 5.03 | 0.51 | -4.07 |
| IPI00878576 | Autotaxin isoform gamma | K.YGPFPEM*TNPLR.E                        | 2 | 3.34 | 0.40 | -3.44 |
| IPI00878576 | Autotaxin isoform gamma | K.YGPFPEM*TNPLREIDK.I                    | 2 | 3.20 | 0.23 | -3.41 |

|             |                         |                                                 |   |      |      |       |
|-------------|-------------------------|-------------------------------------------------|---|------|------|-------|
| IPI00878576 | Autotaxin isoform gamma | K.YGPFPGPEM*TNPLREIDK.I                         | 3 | 1.80 | 0.16 | -1.64 |
| IPI00878576 | Autotaxin isoform gamma | K.YGPFPGPEM*TNPLREIDKIVGQLM*DGLK.Q              | 3 | 4.89 | 0.35 | -4.93 |
| IPI00878576 | Autotaxin isoform gamma | K.YGPFPGPEM*TNPLREIDKIVGQLM*DGLK.Q              | 4 | 2.75 | 0.25 | -4.03 |
| IPI00878576 | Autotaxin isoform gamma | M.SYGFLFPPYLSSSPEAK.Y                           | 2 | 3.49 | 0.41 | -5.28 |
| IPI00878576 | Autotaxin isoform gamma | R.CFELQEAGPPDCR.C                               | 2 | 5.22 | 0.56 | -3.33 |
| IPI00878576 | Autotaxin isoform gamma | R.CVNVIFVGDHGM*EDVTCDR.T                        | 2 | 5.49 | 0.58 | -2.79 |
| IPI00878576 | Autotaxin isoform gamma | R.CVNVIFVGDHGM*EDVTCDR.T                        | 3 | 3.67 | 0.34 | -3.25 |
| IPI00878576 | Autotaxin isoform gamma | R.DIEHLTSLDFFR.K                                | 1 | 3.49 | 0.53 | -2.14 |
| IPI00878576 | Autotaxin isoform gamma | R.DIEHLTSLDFFR.K                                | 2 | 4.04 | 0.46 | -5.32 |
| IPI00878576 | Autotaxin isoform gamma | R.DIEHLTSLDFFR.K                                | 3 | 4.67 | 0.29 | -1.15 |
| IPI00878576 | Autotaxin isoform gamma | R.DIEHLTSLDFFR.K                                | 2 | 3.78 | 0.40 | -3.88 |
| IPI00878576 | Autotaxin isoform gamma | R.DIEHLTSLDFFR.K                                | 3 | 3.52 | 0.40 | -1.84 |
| IPI00878576 | Autotaxin isoform gamma | R.DIEHLTSLDFFR.K                                | 4 | 2.09 | 0.27 | -3.04 |
| IPI00878576 | Autotaxin isoform gamma | R.EIDKIVGQLM*DGLK.Q                             | 2 | 4.20 | 0.41 | -3.54 |
| IPI00878576 | Autotaxin isoform gamma | R.EIDKIVGQLM*DGLK.Q                             | 3 | 2.93 | 0.31 | -2.19 |
| IPI00878576 | Autotaxin isoform gamma | R.EIDKIVGQLM*DGLKQLK.L                          | 3 | 2.65 | 0.17 | -3.22 |
| IPI00878576 | Autotaxin isoform gamma | R.GDCCTNYQVVCK.G                                | 2 | 3.61 | 0.41 | -2.75 |
| IPI00878576 | Autotaxin isoform gamma | R.IEDIHLLVER.R                                  | 1 | 2.56 | 0.26 | -2.97 |
| IPI00878576 | Autotaxin isoform gamma | R.IEDIHLLVER.R                                  | 2 | 3.91 | 0.27 | -1.16 |
| IPI00878576 | Autotaxin isoform gamma | R.IEDIHLLVER.R                                  | 3 | 3.76 | 0.32 | -2.93 |
| IPI00878576 | Autotaxin isoform gamma | R.KPLDVYK.K                                     | 1 | 2.48 | 0.15 | -2.51 |
| IPI00878576 | Autotaxin isoform gamma | R.KPLDVYK.K                                     | 2 | 2.76 | 0.11 | -2.47 |
| IPI00878576 | Autotaxin isoform gamma | R.KPLDVYKPSGK.C                                 | 2 | 3.36 | 0.41 | -3.88 |
| IPI00878576 | Autotaxin isoform gamma | R.NGVNVISGPIFDYDYDGLHDTEDK.I                    | 2 | 5.15 | 0.56 | -3.76 |
| IPI00878576 | Autotaxin isoform gamma | R.NGVNVISGPIFDYDYDGLHDTEDK.I                    | 3 | 3.48 | 0.25 | -5.19 |
| IPI00878576 | Autotaxin isoform gamma | R.NGVNVISGPIFDYDYDGLHDTEDKIK.Q                  | 2 | 4.95 | 0.52 | -6.73 |
| IPI00878576 | Autotaxin isoform gamma | R.NGVNVISGPIFDYDYDGLHDTEDKIK.Q                  | 3 | 4.82 | 0.49 | -4.02 |
| IPI00878576 | Autotaxin isoform gamma | R.NGVNVISGPIFDYDYDGLHDTEDKIK.Q                  | 4 | 4.22 | 0.33 | -4.38 |
| IPI00878576 | Autotaxin isoform gamma | R.RIEDIHLLVER.R                                 | 1 | 2.06 | 0.22 | -3.60 |
| IPI00878576 | Autotaxin isoform gamma | R.RIEDIHLLVER.R                                 | 2 | 3.83 | 0.34 | -4.33 |
| IPI00878576 | Autotaxin isoform gamma | R.RIEDIHLLVER.R                                 | 3 | 2.87 | 0.25 | -2.87 |
| IPI00878576 | Autotaxin isoform gamma | R.RIEDIHLLVERR.W                                | 2 | 2.64 | 0.25 | -4.85 |
| IPI00878576 | Autotaxin isoform gamma | R.SYPEILTK.T                                    | 2 | 2.48 | 0.10 | -2.75 |
| IPI00878576 | Autotaxin isoform gamma | R.TEFLSNYLTNVDDITLVPGLGR.I                      | 2 | 4.76 | 0.50 | -5.12 |
| IPI00878576 | Autotaxin isoform gamma | R.TEFLSNYLTNVDDITLVPGLGR.I                      | 3 | 4.27 | 0.42 | -3.30 |
| IPI00878576 | Autotaxin isoform gamma | R.TEFLSNYLTNVDDITLVPGLGR.I                      | 4 | 3.41 | 0.24 | -4.35 |
| IPI00878576 | Autotaxin isoform gamma | R.TNTFRPTM*PEEVTRPNYPGIM*YLQSDFDLGTCTCDDKVEPK.N | 4 | 3.52 | 0.18 | -3.53 |
| IPI00878576 | Autotaxin isoform gamma | R.TNTFRPTM*PEEVTRPNYPGIM*YLQSDFDLGTCTCDDKVEPK.N | 5 | 4.96 | 0.39 | -0.26 |
| IPI00878576 | Autotaxin isoform gamma | R.VRDIEHLTSLDFFR.K                              | 2 | 4.23 | 0.45 | -5.60 |
| IPI00878576 | Autotaxin isoform gamma | R.VRDIEHLTSLDFFR.K                              | 3 | 3.93 | 0.47 | -5.61 |
| IPI00878576 | Autotaxin isoform gamma | R.VRDIEHLTSLDFFR.K                              | 4 | 3.05 | 0.18 | -4.53 |
| IPI00878576 | Autotaxin isoform gamma | R.VRDIEHLTSLDFFR.K                              | 2 | 2.77 | 0.32 | -5.23 |

|             |                         |                                   |   |      |      |       |
|-------------|-------------------------|-----------------------------------|---|------|------|-------|
| IPI00878576 | Autotaxin isoform gamma | R.VRDIEHLTSLDFFRK.T               | 3 | 4.98 | 0.47 | -4.38 |
| IPI00878576 | Autotaxin isoform gamma | R.VRDIEHLTSLDFFRK.T               | 4 | 4.25 | 0.44 | -5.05 |
| IPI00878576 | Autotaxin isoform gamma | R.VSPSFSQNCLAYK.N                 | 1 | 1.90 | 0.33 | 1.67  |
| IPI00878576 | Autotaxin isoform gamma | R.VSPSFSQNCLAYK.N                 | 2 | 4.15 | 0.47 | -2.45 |
| IPI00878576 | Autotaxin isoform gamma | R.VSPSFSQNCLAYKNDK.Q              | 2 | 4.72 | 0.41 | -4.90 |
| IPI00878576 | Autotaxin isoform gamma | R.VWNYFQR.V                       | 1 | 2.16 | 0.18 | -1.43 |
| IPI00878576 | Autotaxin isoform gamma | R.VWNYFQR.V                       | 2 | 2.26 | 0.08 | -0.39 |
| IPI00878576 | Autotaxin isoform gamma | R.WWGGQPLWITATK.Q                 | 1 | 2.38 | 0.42 | -2.22 |
| IPI00878576 | Autotaxin isoform gamma | R.WWGGQPLWITATK.Q                 | 2 | 4.32 | 0.46 | -3.60 |
| IPI00878576 | Autotaxin isoform gamma | R.WWGGQPLWITATK.Q                 | 3 | 2.44 | 0.11 | -1.72 |
| IPI00878576 | Autotaxin isoform gamma | V.RDIEHLTSLDFFR.K                 | 2 | 2.98 | 0.25 | -2.44 |
| IPI00878576 | Autotaxin isoform gamma | Y.GFLFPPYLSSSPEAK.Y               | 2 | 3.22 | 0.38 | -2.53 |
| IPI00878755 | 43 kDa protein          | R.VILPSIDNIKQDNFEVQR.Y            | 3 | 1.96 | 0.13 | -2.58 |
| IPI00878962 | 10 kDa protein          | K.ATVTKTAGM*QINNEITI.-            | 2 | 2.64 | 0.08 | -7.17 |
| IPI00879084 | 20 kDa protein          | K.AETGDKVYVHLK.N                  | 1 | 2.80 | 0.38 | -4.03 |
| IPI00879084 | 20 kDa protein          | K.AETGDKVYVHLK.N                  | 2 | 3.80 | 0.46 | -3.72 |
| IPI00879084 | 20 kDa protein          | K.AETGDKVYVHLK.N                  | 3 | 3.35 | 0.35 | -3.71 |
| IPI00879084 | 20 kDa protein          | K.ALYLQYTDETFR.T                  | 1 | 3.44 | 0.40 | -4.06 |
| IPI00879084 | 20 kDa protein          | K.ALYLQYTDETFR.T                  | 2 | 4.57 | 0.48 | -7.99 |
| IPI00879084 | 20 kDa protein          | K.HYYIGIETTWDYASDHGEK.K           | 2 | 5.24 | 0.46 | -2.79 |
| IPI00879084 | 20 kDa protein          | K.HYYIGIETTWDYASDHGEK.K           | 3 | 6.53 | 0.58 | -5.59 |
| IPI00879084 | 20 kDa protein          | K.HYYIGIETTWDYASDHGEKK.L          | 3 | 4.00 | 0.41 | -4.37 |
| IPI00879084 | 20 kDa protein          | K.KALYLQYTDETFR.T                 | 2 | 4.81 | 0.53 | -3.58 |
| IPI00879084 | 20 kDa protein          | K.KALYLQYTDETFR.T                 | 3 | 4.32 | 0.40 | -3.32 |
| IPI00879084 | 20 kDa protein          | K.NLASRPYTFHSHGITYYK.E            | 2 | 4.30 | 0.52 | -4.05 |
| IPI00879084 | 20 kDa protein          | K.NLASRPYTFHSHGITYYK.E            | 3 | 4.17 | 0.38 | -3.95 |
| IPI00879084 | 20 kDa protein          | K.PVWLGFLGPIIK.A                  | 2 | 4.19 | 0.44 | -3.44 |
| IPI00879084 | 20 kDa protein          | R.PYTFHSHGITYYK.E                 | 2 | 4.18 | 0.51 | -4.08 |
| IPI00879084 | 20 kDa protein          | R.TTIEKPVWLGFLGPIIK.A             | 2 | 4.91 | 0.49 | -4.57 |
| IPI00879084 | 20 kDa protein          | R.TTIEKPVWLGFLGPIIK.A             | 3 | 3.81 | 0.20 | -6.26 |
| IPI00879084 | 20 kDa protein          | R.TTIEKPVWLGFLGPIIK.A             | 4 | 2.59 | 0.26 | -1.40 |
| IPI00879084 | 20 kDa protein          | W.LGFLGPIIK.A                     | 2 | 3.37 | 0.24 | -0.93 |
| IPI00879309 | Protein                 | K.GKEEFVATFK.G                    | 1 | 2.39 | 0.30 | -4.24 |
| IPI00879309 | Protein                 | K.GKEEFVATFK.G                    | 2 | 2.77 | 0.35 | -2.75 |
| IPI00879309 | Protein                 | K.GNEFFCYDLSHNPIQSSTDEITLAFR.T    | 3 | 5.25 | 0.53 | -1.36 |
| IPI00879309 | Protein                 | K.SADYVNLSLK.S                    | 1 | 2.04 | 0.21 | -2.90 |
| IPI00879309 | Protein                 | K.SADYVNLSLK.S                    | 2 | 3.46 | 0.35 | -2.53 |
| IPI00879309 | Protein                 | R.NGLM*LHTGK.S                    | 2 | 2.94 | 0.13 |       |
| IPI00879309 | Protein                 | R.NPCANGGLCTVLAPGEVGCDCSHTGFGGK.F | 3 | 5.18 | 0.50 | -3.29 |
| IPI00879409 | 28 kDa protein          | K.FVM*DFSDQVAPTDIEEGMR.V          | 2 | 2.03 | 0.13 | 1.81  |
| IPI00879575 | 71 kDa protein          | R.AIYEDQLIGTSHK.H                 | 3 | 2.49 | 0.19 |       |
| IPI00879665 | 112 kDa protein         | H.ILGQYLGNSSGPQK.L                | 2 | 3.14 | 0.38 | -2.17 |

|             |                                           |                                   |   |      |      |       |
|-------------|-------------------------------------------|-----------------------------------|---|------|------|-------|
| IPI00879665 | 112 kDa protein                           | K.ATSAATVQR.A                     | 2 | 2.58 | 0.13 | -3.65 |
| IPI00879665 | 112 kDa protein                           | K.IHVGEER.R                       | 2 | 2.55 | 0.13 | -2.70 |
| IPI00879665 | 112 kDa protein                           | K.IM*YCTDPGEVDHSTR.L              | 3 | 3.43 | 0.36 | -2.38 |
| IPI00879665 | 112 kDa protein                           | K.LYSSTPDLTIQFHSDPAGLIFGK.G       | 2 | 5.11 | 0.57 | -2.83 |
| IPI00879665 | 112 kDa protein                           | K.LYSSTPDLTIQFHSDPAGLIFGK.G       | 3 | 2.22 | 0.11 | -2.79 |
| IPI00879665 | 112 kDa protein                           | K.SALLYDSLQTESVPFEGLLSEGNTIR.I    | 2 | 4.87 | 0.55 | -5.04 |
| IPI00879665 | 112 kDa protein                           | K.SALLYDSLQTESVPFEGLLSEGNTIR.I    | 3 | 6.00 | 0.50 | -6.45 |
| IPI00879665 | 112 kDa protein                           | K.TTSHTELVR.G                     | 1 | 2.31 | 0.20 | -3.44 |
| IPI00879665 | 112 kDa protein                           | K.TTSHTELVR.G                     | 2 | 2.61 | 0.22 | -2.01 |
| IPI00879665 | 112 kDa protein                           | K.VNQDSFEHAL.E                    | 1 | 2.44 | 0.29 | -3.15 |
| IPI00879665 | 112 kDa protein                           | K.VNQDSFEHAL.E                    | 2 | 3.38 | 0.32 | -3.44 |
| IPI00879665 | 112 kDa protein                           | L.ERDALPEGDASPLGPYLLPSGAPER.G     | 3 | 5.02 | 0.40 | -2.86 |
| IPI00879665 | 112 kDa protein                           | R.AASTFNIR.F                      | 1 | 1.71 | 0.11 | -0.19 |
| IPI00879665 | 112 kDa protein                           | R.AASTFNIR.F                      | 2 | 2.35 | 0.16 | -1.78 |
| IPI00879665 | 112 kDa protein                           | R.DALPEGDASPLGPYLLPSGAPER.G       | 3 | 3.64 | 0.19 | -1.96 |
| IPI00879665 | 112 kDa protein                           | R.ETGTPIWTSR.L                    | 1 | 1.81 | 0.20 | -3.34 |
| IPI00879665 | 112 kDa protein                           | R.ETGTPIWTSR.L                    | 2 | 2.28 | 0.28 | -2.43 |
| IPI00879665 | 112 kDa protein                           | R.IEFTSDQAR.A                     | 1 | 1.82 | 0.05 | -3.18 |
| IPI00879665 | 112 kDa protein                           | R.IEFTSDQAR.A                     | 2 | 3.16 | 0.25 | -2.59 |
| IPI00879665 | 112 kDa protein                           | R.LLLHDKDR.M                      | 1 | 2.48 | 0.20 | -5.14 |
| IPI00879665 | 112 kDa protein                           | R.LLLHDKDR.M                      | 2 | 2.83 | 0.22 | -2.19 |
| IPI00879665 | 112 kDa protein                           | R.LPHCVSEESLACDNPGLPENGYQILYKR.L  | 4 | 4.29 | 0.26 | -2.98 |
| IPI00879665 | 112 kDa protein                           | R.SPTNTISVYFR.T                   | 1 | 2.93 | 0.35 | -3.12 |
| IPI00879665 | 112 kDa protein                           | R.SPTNTISVYFR.T                   | 2 | 3.46 | 0.37 | -4.35 |
| IPI00879665 | 112 kDa protein                           | R.TFQDDGLGTFQLHYQAFM*LSCNFPR.R    | 3 | 4.32 | 0.47 | -3.49 |
| IPI00879842 | 6 kDa protein                             | K.CTLLSFLYIKIIKIQIF.-             | 3 | 2.92 | 0.11 |       |
| IPI00879950 | 15 kDa protein                            | K.HTYSTEPNNLKAR.N                 | 2 | 2.82 | 0.06 |       |
| IPI00879950 | 15 kDa protein                            | K.YRPDLM*AAISK.A                  | 2 | 2.23 | 0.14 | -7.00 |
| IPI00880120 | Abhydrolase domain-containing protein 14A | K.TPTLILYGELDHILAR.E              | 2 | 4.07 | 0.38 | -1.84 |
| IPI00880120 | Abhydrolase domain-containing protein 14A | K.TPTLILYGELDHILAR.E              | 3 | 4.83 | 0.51 | -1.94 |
| IPI00880120 | Abhydrolase domain-containing protein 14A | R.ALRDLEVQNAVLVSPSLSGHYALPFLM*R.G | 3 | 3.84 | 0.39 |       |
| IPI00880120 | Abhydrolase domain-containing protein 14A | R.AVALDLPFGFGNSAPSK.E             | 2 | 3.51 | 0.32 | -1.80 |
| IPI00880120 | Abhydrolase domain-containing protein 14A | R.AVALDLPFGFGNSAPSK.E             | 3 | 3.42 | 0.20 | -1.71 |
| IPI00883711 | Similar to Anti-(ED-B) scFV               | K.NSLYLQM*NSLR.A                  | 2 | 3.76 | 0.14 |       |
| IPI00883711 | Similar to Anti-(ED-B) scFV               | K.NSLYLQMNSLR.A                   | 1 | 3.55 | 0.11 |       |
| IPI00883711 | Similar to Anti-(ED-B) scFV               | K.NSLYLQMNSLR.A                   | 2 | 4.01 | 0.17 |       |
| IPI00883711 | Similar to Anti-(ED-B) scFV               | R.DNGKNSLYLQM*NSLR.A              | 2 | 3.50 | 0.07 |       |
| IPI00883753 | NRCAM protein                             | E.PFSHYTLNVR.V                    | 2 | 3.34 | 0.37 | -2.69 |
| IPI00883753 | NRCAM protein                             | H.HQTEVSGTQTTAQLK.L               | 2 | 4.78 | 0.55 | -3.18 |
| IPI00883753 | NRCAM protein                             | K.AAPYWITAPQNLVLSPEGEDGTLICR.A    | 2 | 5.33 | 0.54 | -5.00 |
| IPI00883753 | NRCAM protein                             | K.AAPYWITAPQNLVLSPEGEDGTLICR.A    | 3 | 6.05 | 0.45 | -4.91 |
| IPI00883753 | NRCAM protein                             | K.AAPYWITAPQNLVLSPEGEDGTLICR.A    | 4 | 4.08 | 0.32 | -4.52 |

|             |               |                                               |   |      |      |       |
|-------------|---------------|-----------------------------------------------|---|------|------|-------|
| IPI00883753 | NRCAM protein | K.AETYEGVYQCTAR.N                             | 2 | 4.85 | 0.53 | -3.95 |
| IPI00883753 | NRCAM protein | K.ASEPDKNPTAVEGLGSEPDNLVITWKPLNGFESNGPGLQYK.V | 3 | 6.19 | 0.51 | -1.26 |
| IPI00883753 | NRCAM protein | K.ASEPDKNPTAVEGLGSEPDNLVITWKPLNGFESNGPGLQYK.V | 4 | 5.14 | 0.41 | -3.83 |
| IPI00883753 | NRCAM protein | K.DATWIVK.Q                                   | 1 | 1.93 | 0.13 | -2.71 |
| IPI00883753 | NRCAM protein | K.DATWIVKQPEYAVVQR.G                          | 2 | 4.65 | 0.40 | -3.04 |
| IPI00883753 | NRCAM protein | K.DATWIVKQPEYAVVQR.G                          | 3 | 3.73 | 0.34 | -2.05 |
| IPI00883753 | NRCAM protein | K.DNRELPSDER.F                                | 2 | 2.26 | 0.08 | -1.16 |
| IPI00883753 | NRCAM protein | K.DSTGTYTCVAR.N                               | 1 | 2.43 | 0.41 | -2.36 |
| IPI00883753 | NRCAM protein | K.DSTGTYTCVAR.N                               | 2 | 4.21 | 0.47 | -4.76 |
| IPI00883753 | NRCAM protein | K.EDGM*LPK.N                                  | 1 | 1.38 | 0.11 | -1.82 |
| IPI00883753 | NRCAM protein | K.EELRGNVLSLECIAEGLPTPIIYWAK.E                | 3 | 4.42 | 0.34 | -5.09 |
| IPI00883753 | NRCAM protein | K.EKLEPITLQSGQSLVLP CRPP IGLPPPIIFWM*DNSFQR.L | 3 | 4.40 | 0.55 | -0.96 |
| IPI00883753 | NRCAM protein | K.EKLEPITLQSGQSLVLP CRPP IGLPPPIIFWM*DNSFQR.L | 4 | 6.08 | 0.49 | -4.94 |
| IPI00883753 | NRCAM protein | K.EKLEPITLQSGQSLVLP CRPP IGLPPPIIFWM*DNSFQR.L | 5 | 3.82 | 0.17 | -0.45 |
| IPI00883753 | NRCAM protein | K.FIIEYEDAM*HKPGLWHHQTEVSGTQTTAQLK.L          | 3 | 6.10 | 0.54 | -5.04 |
| IPI00883753 | NRCAM protein | K.FIIEYEDAM*HKPGLWHHQTEVSGTQTTAQLK.L          | 4 | 5.77 | 0.46 | -4.49 |
| IPI00883753 | NRCAM protein | K.FYFYAQTSAAGSGSQITEEAVTTVDEAGILPPDVGAGK.V    | 3 | 2.99 | 0.23 | -2.15 |
| IPI00883753 | NRCAM protein | K.FYFYAQTSAAGSGSQITEEAVTTVDEAGILPPDVGAGK.V    | 4 | 3.11 | 0.13 | -3.74 |
| IPI00883753 | NRCAM protein | K.GEGPASPDRVFNTPEGVPSAPSSLK.I                 | 2 | 3.70 | 0.41 | -3.01 |
| IPI00883753 | NRCAM protein | K.GEGPASPDRVFNTPEGVPSAPSSLK.I                 | 3 | 4.79 | 0.43 | -2.81 |
| IPI00883753 | NRCAM protein | K.IDGDTIIFSNVQER.S                            | 2 | 5.23 | 0.46 | -3.56 |
| IPI00883753 | NRCAM protein | K.IDGDTIIFSNVQER.S                            | 3 | 5.17 | 0.30 | -0.47 |
| IPI00883753 | NRCAM protein | K.ILTFQGSK.T                                  | 2 | 2.22 | 0.13 | -2.25 |
| IPI00883753 | NRCAM protein | K.IVNPTLDLSTLEWDPPSHPNGILTEYTLK.Y             | 2 | 4.84 | 0.53 | -3.73 |
| IPI00883753 | NRCAM protein | K.IVNPTLDLSTLEWDPPSHPNGILTEYTLK.Y             | 3 | 5.21 | 0.51 | -4.58 |
| IPI00883753 | NRCAM protein | K.IVNPTLDLSTLEWDPPSHPNGILTEYTLK.Y             | 4 | 4.06 | 0.30 | -3.90 |
| IPI00883753 | NRCAM protein | K.KILTFQGSK.T                                 | 1 | 2.83 | 0.24 | -4.92 |
| IPI00883753 | NRCAM protein | K.LLEDLVQPPTITQQSPK.D                         | 2 | 4.51 | 0.43 | -4.96 |
| IPI00883753 | NRCAM protein | K.LLEDLVQPPTITQQSPK.D                         | 3 | 4.30 | 0.37 | -3.08 |
| IPI00883753 | NRCAM protein | K.LLEDLVQPPTITQQSPKDYIIDPR.E                  | 2 | 2.14 | 0.21 | -3.78 |
| IPI00883753 | NRCAM protein | K.LLEDLVQPPTITQQSPKDYIIDPR.E                  | 4 | 3.68 | 0.21 | -4.15 |
| IPI00883753 | NRCAM protein | K.LSPYVNYVYFR.V                               | 1 | 2.03 | 0.14 | -2.76 |
| IPI00883753 | NRCAM protein | K.LSPYVNYVYFR.V                               | 2 | 3.02 | 0.41 | -3.03 |
| IPI00883753 | NRCAM protein | K.NEVHLEIK.D                                  | 1 | 2.25 | 0.16 | -4.23 |
| IPI00883753 | NRCAM protein | K.NEVHLEIK.D                                  | 2 | 3.03 | 0.17 | -1.47 |
| IPI00883753 | NRCAM protein | K.NLNFSTR.Y                                   | 2 | 2.17 | 0.14 | -2.56 |
| IPI00883753 | NRCAM protein | K.PLNGFESNGPGLQYK.V                           | 3 | 3.53 | 0.23 | -2.06 |
| IPI00883753 | NRCAM protein | K.QPEYAVVQR.G                                 | 1 | 2.25 | 0.34 | -3.31 |
| IPI00883753 | NRCAM protein | K.QPEYAVVQR.G                                 | 2 | 1.99 | 0.24 | -2.06 |
| IPI00883753 | NRCAM protein | K.SLPSEASEQYLTK.A                             | 1 | 2.36 | 0.33 | -2.91 |
| IPI00883753 | NRCAM protein | K.SLPSEASEQYLTK.A                             | 2 | 4.46 | 0.39 | -6.04 |
| IPI00883753 | NRCAM protein | K.SLPSEASEQYLTK.A                             | 3 | 3.29 | 0.34 | -2.28 |

|             |               |                                               |   |      |      |       |
|-------------|---------------|-----------------------------------------------|---|------|------|-------|
| IPI00883753 | NRCAM protein | K.SVQLSWTPGDDNNSPITK.F                        | 2 | 5.19 | 0.57 | -4.24 |
| IPI00883753 | NRCAM protein | K.THGM*LPGLEPFSHYTLNVR.V                      | 2 | 4.97 | 0.56 | -5.68 |
| IPI00883753 | NRCAM protein | K.THGM*LPGLEPFSHYTLNVR.V                      | 3 | 4.27 | 0.47 | -3.70 |
| IPI00883753 | NRCAM protein | K.TLQIIHVSEADSGNYQCIK.N                       | 2 | 5.96 | 0.62 | -3.27 |
| IPI00883753 | NRCAM protein | K.TLQIIHVSEADSGNYQCIK.N                       | 3 | 5.97 | 0.45 | -4.53 |
| IPI00883753 | NRCAM protein | K.VQALNDM*GFAPEPAVVM*GHSGEDLPM*VAPGNVR.V      | 3 | 5.08 | 0.55 | -4.04 |
| IPI00883753 | NRCAM protein | K.VQALNDM*GFAPEPAVVM*GHSGEDLPM*VAPGNVR.V      | 4 | 3.53 | 0.27 | -4.19 |
| IPI00883753 | NRCAM protein | K.YIVSGTPTFVPLYK.V                            | 1 | 3.11 | 0.41 | -1.34 |
| IPI00883753 | NRCAM protein | K.YIVSGTPTFVPLYK.V                            | 2 | 5.14 | 0.51 | -5.26 |
| IPI00883753 | NRCAM protein | K.YIVSGTPTFVPLYK.V                            | 3 | 3.67 | 0.26 | -3.52 |
| IPI00883753 | NRCAM protein | L.PSEASEQYLTK.A                               | 2 | 3.75 | 0.44 | -2.53 |
| IPI00883753 | NRCAM protein | L.TNGVPIEAPDDPSR.K                            | 2 | 4.14 | 0.45 | -4.34 |
| IPI00883753 | NRCAM protein | P.GLEPFSHYTLNVR.V                             | 2 | 3.39 | 0.30 | -2.09 |
| IPI00883753 | NRCAM protein | Q.PPTITQQSPKDYIIDPR.E                         | 2 | 3.53 | 0.47 | -4.33 |
| IPI00883753 | NRCAM protein | R.EDYICYAR.F                                  | 2 | 1.83 | 0.08 | -2.72 |
| IPI00883753 | NRCAM protein | R.ENIVIQCEAK.G                                | 1 | 2.94 | 0.17 | -3.05 |
| IPI00883753 | NRCAM protein | R.ENIVIQCEAK.G                                | 2 | 3.30 | 0.22 | -2.91 |
| IPI00883753 | NRCAM protein | R.ERPPTFLTPEGNASNK.E                          | 2 | 3.21 | 0.21 | -3.57 |
| IPI00883753 | NRCAM protein | R.ERPPTFLTPEGNASNKEELR.G                      | 2 | 4.57 | 0.36 | -5.17 |
| IPI00883753 | NRCAM protein | R.ERPPTFLTPEGNASNKEELR.G                      | 3 | 5.10 | 0.47 | -3.44 |
| IPI00883753 | NRCAM protein | R.ERPPTFLTPEGNASNKEELRGNVLSLECIAEGLPTPIYWAK.E | 4 | 4.38 | 0.32 | -4.01 |
| IPI00883753 | NRCAM protein | R.GAAVSNIVVRPSR.S                             | 2 | 2.63 | 0.14 | -4.64 |
| IPI00883753 | NRCAM protein | R.GAAVSNIVVRPSR.S                             | 3 | 3.00 | 0.35 | -3.92 |
| IPI00883753 | NRCAM protein | R.GHLQGYR.I                                   | 1 | 1.87 | 0.08 | -5.06 |
| IPI00883753 | NRCAM protein | R.GNVLSLECIAEGLPTPIYWAK.E                     | 2 | 5.21 | 0.54 | -5.18 |
| IPI00883753 | NRCAM protein | R.GNVLSLECIAEGLPTPIYWAK.E                     | 3 | 5.02 | 0.39 | -5.31 |
| IPI00883753 | NRCAM protein | R.GNVLSLECIAEGLPTPIYWAKEDGM*LPK.N             | 3 | 3.52 | 0.34 | -4.35 |
| IPI00883753 | NRCAM protein | R.GSM*VSFECK.V                                | 1 | 2.54 | 0.21 | -3.09 |
| IPI00883753 | NRCAM protein | R.GSM*VSFECK.V                                | 2 | 2.97 | 0.26 | -1.60 |
| IPI00883753 | NRCAM protein | R.ILTPANTLYQVIANR.P                           | 2 | 4.08 | 0.48 | -3.49 |
| IPI00883753 | NRCAM protein | R.ISWLTNGVPIEAPDDPSR.K                        | 2 | 4.97 | 0.37 | -3.38 |
| IPI00883753 | NRCAM protein | R.ISWLTNGVPIEAPDDPSR.K                        | 3 | 3.57 | 0.06 | -3.74 |
| IPI00883753 | NRCAM protein | R.ISWLTNGVPIEAPDDPSRK.I                       | 2 | 3.68 | 0.36 | -1.53 |
| IPI00883753 | NRCAM protein | R.ISWLTNGVPIEAPDDPSRK.I                       | 3 | 5.40 | 0.40 | -2.54 |
| IPI00883753 | NRCAM protein | R.KIDGDTIIFSNVQER.S                           | 2 | 5.34 | 0.51 | -5.43 |
| IPI00883753 | NRCAM protein | R.KIDGDTIIFSNVQER.S                           | 3 | 6.06 | 0.36 | -4.35 |
| IPI00883753 | NRCAM protein | R.TVYKNFEK.T                                  | 1 | 1.90 | 0.08 | -3.71 |
| IPI00883753 | NRCAM protein | R.TVYKNFEK.T                                  | 2 | 2.31 | 0.15 | -1.93 |
| IPI00883753 | NRCAM protein | R.VFNTPEGVPSAPSSLK.I                          | 2 | 4.62 | 0.44 | -5.50 |
| IPI00883753 | NRCAM protein | R.VFNTPEGVPSAPSSLK.I                          | 3 | 2.99 | 0.11 | -2.34 |
| IPI00883753 | NRCAM protein | R.VKAAPYWITAPQNLVSPGEDGLICR.A                 | 3 | 5.92 | 0.48 | -2.80 |
| IPI00883753 | NRCAM protein | R.VKAAPYWITAPQNLVSPGEDGLICR.A                 | 4 | 2.50 | 0.11 | -3.10 |

|             |                                                       |                                     |   |      |      |       |
|-------------|-------------------------------------------------------|-------------------------------------|---|------|------|-------|
| IPI00883753 | NRCAM protein                                         | R.VM*AVNSIGK.S                      | 1 | 2.43 | 0.18 | -3.09 |
| IPI00883753 | NRCAM protein                                         | R.VM*AVNSIGK.S                      | 2 | 2.77 | 0.20 | -2.73 |
| IPI00883753 | NRCAM protein                                         | R.VSQGLNGDLYFSNVLPEDTR.E            | 2 | 5.50 | 0.51 | -3.83 |
| IPI00883753 | NRCAM protein                                         | R.VSQGLNGDLYFSNVLPEDTR.E            | 3 | 4.38 | 0.24 | -2.49 |
| IPI00883753 | NRCAM protein                                         | R.VSQGLNGDLYFSNVLPEDTREDYICYAR.F    | 2 | 1.61 | 0.09 | -3.71 |
| IPI00883753 | NRCAM protein                                         | R.VSQGLNGDLYFSNVLPEDTREDYICYAR.F    | 3 | 4.89 | 0.46 | -6.46 |
| IPI00883753 | NRCAM protein                                         | R.VSQGLNGDLYFSNVLPEDTREDYICYAR.F    | 4 | 3.87 | 0.29 | -5.93 |
| IPI00883753 | NRCAM protein                                         | R.VVNGKGEGPASPDR.V                  | 2 | 3.98 | 0.47 | -4.17 |
| IPI00883753 | NRCAM protein                                         | R.VVNGKGEGPASPDR.V                  | 3 | 3.11 | 0.41 | -3.22 |
| IPI00883753 | NRCAM protein                                         | R.VVNGKGEGPASPDRVFNTPEGVPSAPSSLK.I  | 2 | 3.50 | 0.52 | -3.25 |
| IPI00883753 | NRCAM protein                                         | R.VVNGKGEGPASPDRVFNTPEGVPSAPSSLK.I  | 3 | 4.69 | 0.46 | -4.11 |
| IPI00883753 | NRCAM protein                                         | S.PYVNYSFR.V                        | 2 | 3.17 | 0.25 | -2.62 |
| IPI00883753 | NRCAM protein                                         | T.PGDDNNSPITK.F                     | 2 | 3.60 | 0.43 | -2.53 |
| IPI00883753 | NRCAM protein                                         | W.HHQTEVSGTQTTAQLK.L                | 2 | 4.57 | 0.48 | -4.41 |
| IPI00883753 | NRCAM protein                                         | W.HHQTEVSGTQTTAQLK.L                | 3 | 4.01 | 0.31 | -3.60 |
| IPI00883753 | NRCAM protein                                         | W.ITAPQNLVLSPGEDGTLICR.A            | 2 | 4.37 | 0.47 | -5.49 |
| IPI00883753 | NRCAM protein                                         | W.ITAPQNLVLSPGEDGTLICR.A            | 3 | 4.47 | 0.40 | -4.79 |
| IPI00883753 | NRCAM protein                                         | W.LTNGVPIEIPDDPSR.K                 | 2 | 4.35 | 0.48 | -3.90 |
| IPI00883753 | NRCAM protein                                         | W.TPGDDNNSPITK.F                    | 2 | 3.21 | 0.43 | -0.47 |
| IPI00883765 | Similar to Immunglobulin heavy chain variable region  | R.LSCAASGFSFR.N                     | 2 | 3.83 | 0.20 |       |
| IPI00883765 | Similar to Immunglobulin heavy chain variable region  | R.LSCAASGFSFRNTWMTWVRQAPGKGLEWVGR.I | 4 | 2.92 | 0.11 | 2.83  |
| IPI00883765 | Similar to Immunglobulin heavy chain variable region  | R.TEDTAVYYCAR.D                     | 2 | 4.05 | 0.24 |       |
| IPI00883772 | acid alpha-glucosidase preproprotein                  | A.VPTQCDVPPNSR.F                    | 2 | 3.58 | 0.46 | -1.98 |
| IPI00883772 | acid alpha-glucosidase preproprotein                  | K.AITQEQCEAR.G                      | 2 | 2.83 | 0.28 | -2.03 |
| IPI00883772 | acid alpha-glucosidase preproprotein                  | L.DVM*M*ETENR.L                     | 2 | 3.18 | 0.28 | -2.86 |
| IPI00883772 | acid alpha-glucosidase preproprotein                  | R.AGYIPLQGGPGLTTTESR.Q              | 2 | 3.03 | 0.18 | -1.87 |
| IPI00883772 | acid alpha-glucosidase preproprotein                  | R.GAYTQVIFLAR.N                     | 2 | 3.53 | 0.25 | -2.50 |
| IPI00883772 | acid alpha-glucosidase preproprotein                  | R.LDVM*M*ETENR.L                    | 2 | 3.36 | 0.40 | -3.22 |
| IPI00883772 | acid alpha-glucosidase preproprotein                  | R.NHNSLLSLPQEPYSFSEPAQQAM*R.K       | 3 | 5.32 | 0.53 | -4.98 |
| IPI00883772 | acid alpha-glucosidase preproprotein                  | R.VTSEGAGLQLQK.V                    | 2 | 3.96 | 0.33 | -2.37 |
| IPI00883855 | Similar to Hepatitis B virus receptor binding protein | K.GTTVTVSSASTK.G                    | 1 | 2.22 | 0.33 |       |
| IPI00883855 | Similar to Hepatitis B virus receptor binding protein | K.GTTVTVSSASTK.G                    | 2 | 3.67 | 0.42 |       |
| IPI00883855 | Similar to Hepatitis B virus receptor binding protein | R.ADDTAVYYCAK.S                     | 2 | 4.07 | 0.33 |       |
| IPI00883855 | Similar to Hepatitis B virus receptor binding protein | R.DNSKNTLYLEM*NSLR.A                | 2 | 4.62 | 0.31 |       |
| IPI00883855 | Similar to Hepatitis B virus receptor binding protein | R.DNSKNTLYLEMNSLR.A                 | 2 | 4.72 | 0.09 |       |
| IPI00883855 | Similar to Hepatitis B virus receptor binding protein | R.DNSKNTLYLEMNSLR.A                 | 3 | 3.52 | 0.16 |       |
| IPI00883879 | Similar to Anti-IFN-G scFv                            | C.EVQLLESGGGLVQPGGSLR.L             | 1 | 4.02 | 0.09 |       |
| IPI00883879 | Similar to Anti-IFN-G scFv                            | C.EVQLLESGGGLVQPGGSLR.L             | 2 | 5.62 | 0.07 |       |
| IPI00883879 | Similar to Anti-IFN-G scFv                            | K.NTLYLHM*NSLR.V                    | 2 | 2.49 | 0.21 |       |

|             |                                                      |                                  |   |      |      |       |
|-------------|------------------------------------------------------|----------------------------------|---|------|------|-------|
| IPI00883879 | Similar to Anti-IFN-G scFv                           | R.VEDTAVYYCAK.D                  | 2 | 3.33 | 0.21 |       |
| IPI00884004 | Rheumatoid factor RF-ET12 (Fragment)                 | R.FTISRDDSK.N                    | 2 | 2.52 | 0.15 |       |
| IPI00884080 | Similar to Immunglobulin heavy chain variable region | K.NTLYLQMNSLR.A                  | 1 | 3.28 | 0.09 |       |
| IPI00884080 | Similar to Immunglobulin heavy chain variable region | K.NTLYLQMNSLR.A                  | 2 | 4.45 | 0.07 |       |
| IPI00884080 | Similar to Immunglobulin heavy chain variable region | R.FTISRDDSK.N                    | 2 | 2.52 | 0.15 |       |
| IPI00884080 | Similar to Immunglobulin heavy chain variable region | R.VEDTAVYYCAR.D                  | 1 | 2.58 | 0.24 |       |
| IPI00884080 | Similar to Immunglobulin heavy chain variable region | R.VEDTAVYYCAR.D                  | 2 | 3.93 | 0.40 |       |
| IPI00884092 | Anti-HER3 scFv (Fragment)                            | K.NTLYLQM*NR.L                   | 2 | 1.98 | 0.23 |       |
| IPI00884092 | Anti-HER3 scFv (Fragment)                            | R.LSCAASGFTFSSYEM*NWVR.Q         | 2 | 4.10 | 0.43 |       |
| IPI00884092 | Anti-HER3 scFv (Fragment)                            | S.DIQM*TQSPSTLSASIGDR.V          | 2 | 5.72 | 0.34 |       |
| IPI00884353 | Ets-1 transcript variant ets-1 delta                 | K.VDLELFPSPGKLGQDSFESVESYDSCDR.L | 3 | 2.36 | 0.13 | -7.81 |
| IPI00884389 | Similar to Immunglobulin heavy chain variable region | K.TTLYLQM*NSLK.T                 | 2 | 2.82 | 0.19 |       |
| IPI00884389 | Similar to Immunglobulin heavy chain variable region | R.DDSKTTLYLQM*NSLK.T             | 2 | 4.47 | 0.27 |       |
| IPI00884389 | Similar to Immunglobulin heavy chain variable region | R.FTISRDDSK.N                    | 2 | 2.52 | 0.15 |       |
