# Supplementary material for: Establishing the Proteome of Normal Human Cerebrospinal Fluid
Source: PubMed Central journal article supplement (PMC2881861; doi:10.1371/journal.pone.0010980), 2010-06-11
Supplement: pone.0010980.s009.pdf [file pone.0010980.s009.pdf]

**Supplementary Table 2. Analysis of overlap between proteins identified in normal CSF, plasma and previous CSF (neurologic surrogate-normal) proteomic study**

| <b>PNNL<br/>plasma<br/>(burn-<br/>trauma)<br/>proteome</b> | <b>Zougman-<br/>neurologic-<br/>surrogate<br/>normals</b> | <b>IPI</b>  | <b>Protein name</b>                                                            | <b>Gene symbol</b> | <b>unique<br/>peptide<br/>count</b> |
|------------------------------------------------------------|-----------------------------------------------------------|-------------|--------------------------------------------------------------------------------|--------------------|-------------------------------------|
| √                                                          | √                                                         | IPI00022434 | Uncharacterized protein ALB                                                    | ALB                | 189                                 |
| √                                                          | √                                                         | IPI00783987 | Complement C3 precursor (Fragment)                                             | C3                 | 153                                 |
| √                                                          | √                                                         | IPI00418163 | C4B1                                                                           | C4B                | 153                                 |
|                                                            | √                                                         | IPI00032258 | Complement C4-A precursor                                                      | C4A;C4B            | 151                                 |
| √                                                          | √                                                         | IPI00878517 | 56 kDa protein                                                                 | ALB                | 141                                 |
| √                                                          | √                                                         | IPI00006601 | Secretogranin-1 precursor                                                      | CHGB               | 133                                 |
| √                                                          | √                                                         | IPI00384697 | Isoform 2 of Serum albumin precursor                                           | ALB                | 119                                 |
| √                                                          | √                                                         | IPI00022463 | Serotransferrin precursor                                                      | TF                 | 105                                 |
|                                                            | √                                                         | IPI00069058 | VEGF nerve growth factor inducible precursor                                   | VEGF               | 105                                 |
| √                                                          | √                                                         | IPI00798430 | Transferrin variant (Fragment)                                                 | TF                 | 104                                 |
| √                                                          | √                                                         | IPI00478003 | Alpha-2-macroglobulin precursor                                                | A2M                | 97                                  |
| √                                                          | √                                                         | IPI00017601 | Ceruloplasmin precursor                                                        | CP                 | 95                                  |
| √                                                          | √                                                         | IPI00292071 | Secretogranin-3 precursor                                                      | SCG3               | 90                                  |
| √                                                          | √                                                         | IPI00026314 | Isoform 1 of Gelsolin precursor                                                | GSN                | 86                                  |
| √                                                          | √                                                         | IPI00029751 | Isoform 1 of Contactin-1 precursor                                             | CNTN1              | 83                                  |
|                                                            |                                                           | IPI00289501 | Neurosecretory protein VEGF precursor                                          | VEGF               | 83                                  |
| √                                                          | √                                                         | IPI00013179 | Prostaglandin-H2 D-isomerase precursor                                         | PTGDS              | 81                                  |
| √                                                          | √                                                         | IPI00514285 | Prostaglandin D2 synthase 21kDa                                                | PTGDS              | 79                                  |
| √                                                          | √                                                         | IPI00296777 | SPARC-like protein 1 precursor                                                 | SPARCL1            | 79                                  |
| √                                                          | √                                                         | IPI00022229 | Apolipoprotein B-100 precursor                                                 | APOB               | 79                                  |
| √                                                          | √                                                         | IPI00006114 | Pigment epithelium-derived factor precursor                                    | SERPINF1           | 76                                  |
| √                                                          | √                                                         | IPI00783390 | Isoform 1 of Neural cell adhesion molecule L1-like protein precursor           | CHL1               | 73                                  |
| √                                                          | √                                                         | IPI00029739 | Isoform 1 of Complement factor H precursor                                     | CFH                | 73                                  |
| √                                                          | √                                                         | IPI00242956 | IgGFc-binding protein precursor                                                | FCGBP              | 73                                  |
| √                                                          | √                                                         | IPI00299059 | Isoform 2 of Neural cell adhesion molecule L1-like protein precursor           | CHL1               | 72                                  |
| √                                                          | √                                                         | IPI00291262 | Clusterin precursor                                                            | CLU                | 71                                  |
| √                                                          | √                                                         | IPI00794184 | 97 kDa protein                                                                 | CP                 | 70                                  |
| √                                                          | √                                                         | IPI00788189 | similar to Fc fragment of IgG binding protein                                  | FCGBP              | 68                                  |
| √                                                          | √                                                         | IPI00553177 | Isoform 1 of Alpha-1-antitrypsin precursor                                     | SERPINA1           | 68                                  |
| √                                                          | √                                                         | IPI00304273 | Apolipoprotein A-IV precursor                                                  | APOA4              | 65                                  |
| √                                                          | √                                                         | IPI00024284 | Basement membrane-specific heparan sulfate proteoglycan core protein precursor | HSPG2              | 64                                  |

|   |   |             |                                                                                     |          |    |
|---|---|-------------|-------------------------------------------------------------------------------------|----------|----|
| √ |   | IPI00883753 | NRCAM protein                                                                       | NRCAM    | 64 |
| √ |   | IPI00847179 | apolipoprotein A-IV precursor                                                       | APOA4    | 64 |
| √ | √ | IPI00555812 | Vitamin D-binding protein precursor                                                 | GC       | 63 |
| √ | √ | IPI00333776 | Isoform 1 of Neuronal cell adhesion molecule precursor                              | NRCAM    | 63 |
| √ | √ | IPI00742696 | vitamin D-binding protein precursor                                                 | GC       | 62 |
| √ |   | IPI00415032 | Isoform 4 of Neuronal cell adhesion molecule precursor                              | NRCAM    | 62 |
| √ | √ | IPI00072917 | alpha 3 type VI collagen isoform 3 precursor                                        | COL6A3   | 61 |
| √ | √ | IPI00022488 | Hemopexin precursor                                                                 | HPX      | 61 |
| √ | √ | IPI00647027 | 32 kDa protein                                                                      | CHGB     | 60 |
| √ | √ | IPI00020557 | Prolow-density lipoprotein receptor-related protein 1 precursor                     | LRP1     | 59 |
| √ | √ | IPI00241562 | reelin isoform a                                                                    | RELN     | 59 |
|   | √ | IPI00607600 | amyloid precursor-like protein 1 isoform 1 precursor                                | APLP1    | 59 |
|   | √ | IPI00020012 | Amyloid-like protein 1 precursor                                                    | APLP1    | 59 |
| √ | √ | IPI00032220 | Angiotensinogen precursor                                                           | AGT      | 58 |
| √ | √ | IPI00007257 | calsyntenin 1 isoform 2                                                             | CLSTN1   | 57 |
| √ | √ | IPI00032291 | Complement C5 precursor                                                             | C5       | 57 |
| √ | √ | IPI00156171 | Isoform 1 of Ectonucleotide pyrophosphatase/phosphodiesterase family member 2 precu | ENPP2    | 57 |
|   | √ | IPI00414249 | Isoform 1 of Neurexin-3-alpha precursor                                             | NRXN3    | 57 |
|   |   | IPI00878576 | Autotaxin isoform gamma                                                             | -        | 57 |
| √ | √ | IPI00413959 | Calsyntenin-1 precursor                                                             | CLSTN1   | 56 |
| √ | √ | IPI00021842 | Apolipoprotein E precursor                                                          | APOE     | 56 |
| √ | √ | IPI00064667 | Beta-Ala-His dipeptidase precursor                                                  | CNDP1    | 55 |
| √ | √ | IPI00303210 | Isoform 2 of Ectonucleotide pyrophosphatase/phosphodiesterase family member 2 precu | ENPP2    | 54 |
| √ | √ | IPI00006608 | Isoform APP770 of Amyloid beta A4 protein precursor (Fragment)                      | APP      | 53 |
|   | √ | IPI00216728 | Neurexin 3-alpha                                                                    | NRXN3    | 53 |
|   | √ | IPI00007921 | Isoform 1 of Neurexin-2-alpha precursor                                             | NRXN2    | 51 |
| √ | √ | IPI00550991 | Alpha-1-antichymotrypsin precursor                                                  | SERPINA3 | 50 |
|   | √ | IPI00009362 | Secretogranin-2 precursor                                                           | SCG2     | 50 |
|   |   | IPI00655702 | Isoform 5 of Neurofascin precursor                                                  | NFASC    | 50 |
| √ | √ | IPI00795918 | neural cell adhesion molecule 1 isoform 2                                           | NCAM1    | 49 |
| √ | √ | IPI00019591 | Isoform 1 of Complement factor B precursor (Fragment)                               | CFB      | 49 |
| √ | √ | IPI00290315 | Chromogranin-A precursor                                                            | CHGA     | 49 |
|   | √ | IPI00470535 | Dihydropyridine receptor alpha 2 subunit                                            | CACNA2D1 | 49 |
| √ | √ | IPI00291136 | Collagen alpha-1(VI) chain precursor                                                | COL6A1   | 48 |
| √ | √ | IPI00021841 | Apolipoprotein A-I precursor                                                        | APOA1    | 48 |
| √ | √ | IPI00177543 | peptidylglycine alpha-amidating monooxygenase isoform a, preproprotein              | PAM      | 48 |
|   | √ | IPI00394655 | Isoform 4 of Neurofascin precursor                                                  | NFASC    | 48 |
| √ |   | IPI00479514 | Voltage-dependent calcium channel subunit alpha-2/delta-1 precursor                 | CACNA2D1 | 48 |
| √ |   | IPI00639937 | B-factor, properdin                                                                 | CFB      | 47 |
| √ | √ | IPI00021000 | Isoform A of Osteopontin precursor                                                  | SPP1     | 46 |

|   |   |             |                                                                        |           |    |
|---|---|-------------|------------------------------------------------------------------------|-----------|----|
| √ | √ | IPI00478809 | Coagulation factor V precursor                                         | F5        | 46 |
| √ | √ | IPI00022937 | Coagulation factor V                                                   | F5        | 46 |
| √ | √ | IPI00032179 | Antithrombin III variant                                               | SERPINC1  | 46 |
| √ | √ | IPI00023814 | Isoform 1 of Neogenin precursor                                        | NEO1      | 45 |
|   |   | IPI00220741 | spectrin, alpha, erythrocytic 1                                        | SPTA1     | 45 |
| √ | √ | IPI00019580 | Plasminogen precursor                                                  | PLG       | 44 |
| √ | √ | IPI00294193 | Isoform 1 of Inter-alpha-trypsin inhibitor heavy chain H4 precursor    | ITIH4     | 44 |
| √ | √ | IPI00024966 | Contactin-2 precursor                                                  | CNTN2     | 44 |
| √ | √ | IPI00218192 | Isoform 2 of Inter-alpha-trypsin inhibitor heavy chain H4 precursor    | ITIH4     | 44 |
| √ | √ | IPI00218875 | Isoform C of Osteopontin precursor                                     | SPP1      | 43 |
| √ | √ | IPI00219042 | Isoform 3 of Peptidyl-glycine alpha-amidating monooxygenase precursor  | PAM       | 42 |
| √ | √ | IPI00306339 | secreted phosphoprotein 1 isoform b                                    | SPP1      | 42 |
| √ | √ | IPI00296608 | Complement component C7 precursor                                      | C7        | 42 |
|   |   | IPI00739237 | similar to Complement C3 precursor                                     | LOC653879 | 42 |
| √ | √ | IPI00009997 | N-acetyllactosaminide beta-1,3-N-acetylglucosaminyltransferase         | B3GNT1    | 41 |
| √ | √ | IPI00305461 | Inter-alpha-trypsin inhibitor heavy chain H2 precursor                 | ITIH2     | 41 |
| √ | √ | IPI00032293 | Cystatin-C precursor                                                   | CST3      | 41 |
| √ | √ | IPI00220644 | Isoform M1 of Pyruvate kinase isozymes M1/M2                           | PKM2      | 41 |
|   |   | IPI00334238 | neuronal pentraxin receptor                                            | NPTXR     | 41 |
| √ | √ | IPI00853525 | Apolipoprotein A1                                                      | APOA1     | 40 |
| √ | √ | IPI00218874 | Isoform B of Osteopontin precursor                                     | SPP1      | 40 |
| √ | √ | IPI00215894 | Isoform LMW of Kininogen-1 precursor                                   | KNG1      | 39 |
| √ | √ | IPI00031030 | Isoform 1 of Amyloid-like protein 2 precursor                          | APLP2     | 39 |
| √ | √ | IPI00025276 | Isoform XB of Tenascin-X precursor                                     | TNXB      | 39 |
| √ | √ | IPI00032328 | Isoform HMW of Kininogen-1 precursor                                   | KNG1      | 37 |
| √ | √ | IPI00376427 | Neural cell adhesion molecule 2 precursor                              | NCAM2     | 37 |
|   |   | IPI00456623 | Isoform 1 of Brevican core protein precursor                           | BCAN      | 37 |
| √ | √ | IPI00019943 | Afamin precursor                                                       | AFM       | 36 |
| √ | √ | IPI00748312 | protein tyrosine phosphatase, receptor-type, zeta1 precursor           | PTPRZ1    | 36 |
| √ | √ | IPI00291866 | Plasma protease C1 inhibitor precursor                                 | SERPING1  | 36 |
| √ | √ | IPI00021885 | Isoform 1 of Fibrinogen alpha chain precursor                          | FGA       | 35 |
| √ | √ | IPI00022395 | Complement component C9 precursor                                      | C9        | 35 |
| √ | √ | IPI00289831 | Isoform PTPS of Receptor-type tyrosine-protein phosphatase S precursor | PTPRS     | 35 |
| √ | √ | IPI00027310 | Isoform 1 of Multiple epidermal growth factor-like domains 8           | MEGF8     | 34 |
| √ | √ | IPI00815926 | IGHG1 protein                                                          | IGHG1     | 34 |
| √ | √ | IPI00302641 | Protocadherin Fat 2 precursor                                          | FAT2      | 34 |
| √ | √ | IPI00017696 | Complement C1s subcomponent precursor                                  | C1S       | 34 |
| √ | √ | IPI00375547 | Protein tyrosine phosphatase receptor type D                           | PTPRD     | 34 |
| √ | √ | IPI00015260 | Protein kinase C-binding protein NELL2 precursor                       | NELL2     | 34 |
|   |   | IPI00607580 | multiple EGF-like-domains 8                                            | MEGF8     | 34 |

|   |   |             |                                                                 |          |    |
|---|---|-------------|-----------------------------------------------------------------|----------|----|
|   |   | IPI00784828 | Putative uncharacterized protein DKFZp686C11235                 | -        | 34 |
|   |   | IPI00784807 | Putative uncharacterized protein                                | -        | 34 |
| √ | √ | IPI00002714 | Dickkopf-related protein 3 precursor                            | DKK3     | 33 |
| √ | √ | IPI00219798 | Isoform 1 of Roundabout homolog 1 precursor                     | ROBO1    | 33 |
| √ |   | IPI00426051 | Putative uncharacterized protein DKFZp686C15213                 | -        | 33 |
| √ | √ | IPI00296537 | Isoform C of Fibulin-1 precursor                                | FBLN1    | 32 |
| √ | √ | IPI00384542 | Isoform 2 of Nidogen-1 precursor                                | NID1     | 32 |
| √ | √ | IPI00025465 | Mimecan precursor                                               | OGN      | 32 |
| √ | √ | IPI00796279 | 25 kDa protein                                                  | SERPINF1 | 32 |
| √ | √ | IPI00107831 | Receptor-type tyrosine-protein phosphatase F precursor          | PTPRF    | 32 |
| √ | √ | IPI00761159 | IGHM protein                                                    | IGHM     | 32 |
| √ | √ | IPI00026944 | Isoform 1 of Nidogen-1 precursor                                | NID1     | 32 |
| √ |   | IPI00472345 | IGHG3 protein                                                   | IGHG3    | 32 |
|   |   | IPI00791343 | 261 kDa protein                                                 | -        | 32 |
|   |   | IPI00784894 | Putative uncharacterized protein                                | -        | 32 |
| √ | √ | IPI00018219 | Transforming growth factor-beta-induced protein ig-h3 precursor | TGFBI    | 31 |
| √ | √ | IPI00298497 | Fibrinogen beta chain precursor                                 | FGB      | 31 |
| √ | √ | IPI00003802 | Alpha-mannosidase 2                                             | MAN2A1   | 31 |
| √ | √ | IPI00025257 | Semaphorin-7A precursor                                         | SEMA7A   | 31 |
| √ | √ | IPI00448925 | IGHG1 protein                                                   | IGHG1    | 31 |
| √ | √ | IPI00328829 | inter-alpha trypsin inhibitor heavy chain precursor 5 isoform 1 | ITIH5    | 31 |
|   | √ | IPI00031121 | Carboxypeptidase E precursor                                    | CPE      | 31 |
| √ | √ | IPI00022432 | Transthyretin precursor                                         | TTR      | 30 |
| √ | √ | IPI00641737 | Haptoglobin precursor                                           | HP       | 30 |
| √ | √ | IPI00816741 | Complement component 5 variant (Fragment)                       | C5       | 30 |
| √ | √ | IPI00296534 | Isoform D of Fibulin-1 precursor                                | FBLN1    | 30 |
| √ | √ | IPI00218725 | laminin alpha 2 subunit isoform b precursor                     | LAMA2    | 30 |
| √ | √ | IPI00027703 | Isoform Long of Alpha-mannosidase IIx                           | MAN2A2   | 30 |
| √ | √ | IPI00423463 | Putative uncharacterized protein DKFZp686O01196                 | IGHG1    | 30 |
|   |   | IPI00784842 | Putative uncharacterized protein DKFZp686G11190                 | IGHV4-31 | 30 |
| √ | √ | IPI00219029 | Aspartate aminotransferase, cytoplasmic                         | GOT1     | 29 |
| √ | √ | IPI00295542 | Nucleobindin-1 precursor                                        | NUCB1    | 29 |
| √ | √ | IPI00744835 | Isoform Sap-mu-9 of Proactivator polypeptide precursor          | PSAP     | 29 |
| √ | √ | IPI00012503 | Isoform Sap-mu-0 of Proactivator polypeptide precursor          | PSAP     | 29 |
| √ | √ | IPI00418262 | Fructose-bisphosphate aldolase C                                | ALDOC    | 29 |
|   | √ | IPI00159927 | Neurocan core protein precursor                                 | NCAN     | 29 |
|   |   | IPI00784810 | IGHV4-31 protein                                                | IGHV4-31 | 29 |
|   |   | IPI00785084 | Immunoglobulin heavy variable 4-31                              | IGHV4-31 | 29 |
| √ | √ | IPI00011229 | Cathepsin D precursor                                           | CTSD     | 28 |
| √ | √ | IPI00465439 | Fructose-bisphosphate aldolase A                                | ALDOA    | 28 |

|   |    |             |                                                                                   |               |    |
|---|----|-------------|-----------------------------------------------------------------------------------|---------------|----|
| √ | √  | IPI00016334 | Isoform 1 of Cell surface glycoprotein MUC18 precursor                            | MCAM          | 28 |
| √ | √  | IPI00003362 | HSPA5 protein                                                                     | HSPA5         | 28 |
| √ | √  | IPI00853369 | Plexin-B2 precursor                                                               | PLXNB2        | 28 |
| √ | √  | IPI00872363 | PTPRD protein                                                                     | PTPRD         | 28 |
| √ | √  | IPI00423466 | Putative uncharacterized protein DKFZp686H20196                                   | IGHG1         | 28 |
|   |    | IPI00790899 | 55 kDa protein                                                                    | -             | 28 |
| √ | √  | IPI00334282 | Protein FAM3C precursor                                                           | FAM3C         | 27 |
| √ | √  | IPI00019568 | Prothrombin precursor (Fragment)                                                  | F2            | 27 |
| √ | √  | IPI00296165 | Complement C1r subcomponent precursor                                             | C1R;C17orf13; | 27 |
| √ | √  | IPI00829767 | Uncharacterized protein IGHG2 (Fragment)                                          | IGHG2         | 27 |
| √ | √  | IPI00292950 | Serpin peptidase inhibitor, clade D (Heparin cofactor), member 1                  | SERPIND1      | 27 |
| √ | √  | IPI00292530 | Inter-alpha-trypsin inhibitor heavy chain H1 precursor                            | ITIH1         | 27 |
| √ | √  | IPI00023673 | Galectin-3-binding protein precursor                                              | LGALS3BP      | 27 |
| √ | √  | IPI00303963 | Complement C2 precursor (Fragment)                                                | C2            | 27 |
|   | √* | IPI00000828 | Proenkephalin A precursor                                                         | PENK          | 26 |
| √ | √  | IPI00828205 | IGHM protein                                                                      | IGHM          | 26 |
| √ | √  | IPI00451625 | Isoform 2 of Cartilage acidic protein 1 precursor                                 | CRTAC1        | 26 |
| √ | √  | IPI00029658 | Isoform 1 of EGF-containing fibulin-like extracellular matrix protein 1 precursor | EFEMP1        | 26 |
|   | √  | IPI00016150 | Neuroserpin precursor                                                             | SERPINI1      | 26 |
|   | √  | IPI00004433 | Contactin-6 precursor                                                             | CNTN6         | 26 |
| √ |    | IPI00012545 | Isoform TGN51 of Trans-Golgi network integral membrane protein 2 precursor        | TGOLN2        | 26 |
| √ |    | IPI00025252 | Protein disulfide-isomerase A3 precursor                                          | PDIA3         | 26 |
| √ |    | IPI00220117 | Uncharacterized protein CD99                                                      | CD99          | 26 |
|   |    | IPI00784942 | Putative uncharacterized protein DKFZp686E23209                                   | -             | 26 |
| √ | √  | IPI00022895 | Alpha-1B-glycoprotein precursor                                                   | A1BG          | 25 |
| √ | √  | IPI00394992 | Isoform 2 of N-acetylmuramoyl-L-alanine amidase precursor                         | PGLYRP2       | 25 |
| √ | √  | IPI00550558 | Protein O-linked-mannose beta-1,2-N-acetylglucosaminyltransferase 1               | POMGNT1       | 25 |
| √ | √  | IPI00298828 | Beta-2-glycoprotein 1 precursor                                                   | APOH          | 25 |
| √ | √  | IPI00163207 | Isoform 1 of N-acetylmuramoyl-L-alanine amidase precursor                         | PGLYRP2       | 25 |
| √ | √  | IPI00009920 | Complement component 6 precursor                                                  | C6            | 25 |
|   | √  | IPI00300241 | Leucine-rich repeat-containing protein 4B precursor                               | LRRC4B        | 25 |
| √ |    | IPI00386879 | CDNA FLJ14473 fis, clone MAMMA1001080, highly similar to Homo sapiens SNC73 prot  | IGHV3OR16-13  | 25 |
| √ |    | IPI00382606 | Factor VII active site mutant immunoconjugate                                     | F7            | 25 |
|   | √* | IPI00788835 | 25 kDa protein                                                                    | PENK          | 24 |
| √ | √  | IPI00015102 | Isoform 1 of CD166 antigen precursor                                              | ALCAM         | 24 |
| √ | √  | IPI00013976 | Laminin subunit beta-1 precursor                                                  | LAMB1         | 24 |
| √ | √  | IPI00216171 | Gamma-enolase                                                                     | ENO2          | 24 |
|   |    | IPI00439446 | MAN1A1 protein                                                                    | MAN1A1        | 24 |
| √ | √  | IPI00027780 | 72 kDa type IV collagenase precursor                                              | MMP2          | 23 |
| √ | √  | IPI00162735 | Isoform 2 of Attractin precursor                                                  | ATRNL         | 23 |

|   |    |             |                                                                                     |              |    |
|---|----|-------------|-------------------------------------------------------------------------------------|--------------|----|
| √ | √  | IPI00002147 | Chitinase-3-like protein 1 precursor                                                | CHI3L1       | 23 |
| √ | √  | IPI00294395 | Complement component C8 beta chain precursor                                        | C8B          | 23 |
| √ | √  | IPI00008318 | Ephrin type-A receptor 4 precursor                                                  | EPHA4        | 23 |
| √ | √  | IPI00853454 | 200 kDa protein                                                                     | LAMB1        | 23 |
| √ | √  | IPI00027087 | Isoform 1 of Neural cell adhesion molecule L1 precursor                             | L1CAM        | 23 |
| √ | √  | IPI00029863 | SERPINF2 protein                                                                    | SERPINF2     | 23 |
|   | √  | IPI00029343 | Isoform 1 of Contactin-associated protein-like 2 precursor                          | CNTNAP2      | 23 |
|   | √  | IPI00430842 | IGHA1 protein                                                                       | IGHV3OR16-13 | 23 |
|   |    | IPI00744561 | IGHA1 protein                                                                       | IGHV3OR16-13 | 23 |
|   |    | IPI00784998 | Putative uncharacterized protein DKFZp686M24218                                     | -            | 23 |
|   | √* | IPI00166048 | Isoform 1 of Cell adhesion molecule 3 precursor                                     | CADM3        | 22 |
| √ | √  | IPI00442294 | Neurotrimin variant 3                                                               | HNT          | 22 |
| √ | √  | IPI00296922 | Laminin subunit beta-2 precursor                                                    | LAMB2        | 22 |
| √ | √  | IPI00016915 | Insulin-like growth factor-binding protein 7 precursor                              | IGFBP7       | 22 |
| √ | √  | IPI00844156 | SERPINC1 protein                                                                    | SERPINC1     | 22 |
| √ | √  | IPI00003351 | Extracellular matrix protein 1 precursor                                            | ECM1         | 22 |
| √ | √  | IPI00646281 | L1 cell adhesion molecule                                                           | L1CAM        | 22 |
|   | √  | IPI00023845 | Kallikrein-6 precursor                                                              | KLK6         | 22 |
|   | √  | IPI00374563 | Agrin precursor                                                                     | AGRN         | 22 |
|   | √  | IPI00002280 | ProSAAS precursor                                                                   | PCSK1N       | 22 |
| √ | √  | IPI00298971 | Vitronectin precursor                                                               | VTN          | 21 |
| √ | √  | IPI00029260 | Monocyte differentiation antigen CD14 precursor                                     | CD14         | 21 |
| √ | √  | IPI00442297 | Isoform 2 of Neurotrimin precursor                                                  | HNT          | 21 |
| √ | √  | IPI00830132 | Uncharacterized protein IGHG4 (Fragment)                                            | IGHG4        | 21 |
| √ | √  | IPI00872555 | cDNA FLJ76262, highly similar to Homo sapiens I factor (complement) (IF), mRNA      | CFI          | 21 |
| √ | √  | IPI00218733 | Superoxide dismutase                                                                | SOD1         | 21 |
| √ | √  | IPI00515041 | Uncharacterized protein CFH                                                         | CFH          | 21 |
| √ | √  | IPI00019157 | Chondroitin sulfate proteoglycan 4 precursor                                        | CSPG4        | 21 |
| √ | √  | IPI00465028 | Isoform 1 of Triosephosphate isomerase                                              | TPI1         | 21 |
|   | √  | IPI00220562 | Neuronal pentraxin-1 precursor                                                      | NPTX1        | 21 |
|   | √  | IPI00166622 | similar to CG14446-PA                                                               | TMEM132C     | 21 |
|   | √  | IPI00787050 | similar to neuronal pentraxin I precursor                                           | NPTX1        | 21 |
| √ |    | IPI00216704 | Isoform 2 of Spectrin beta chain, erythrocyte                                       | SPTB         | 21 |
| √ |    | IPI00647704 | CDNA FLJ41552 fis, clone COLON2004478, highly similar to Protein Tro alpha1 H,myelo | IGHV3OR16-13 | 21 |
|   |    | IPI00784950 | Putative uncharacterized protein DKFZp686L19235                                     | LOC100126583 | 21 |
|   |    | IPI00550731 | Putative uncharacterized protein                                                    | -            | 21 |
|   |    | IPI00472249 | protein tyrosine phosphatase, receptor type, N polypeptide 2 isoform 2 precursor    | PTPRN2       | 21 |
| √ | √  | IPI00654888 | Plasma kallikrein precursor                                                         | KLKB1        | 20 |
| √ | √  | IPI00792626 | 14 kDa protein                                                                      | TF           | 20 |
| √ | √  | IPI00171411 | Golgi phosphoprotein 2                                                              | GOLM1        | 20 |

|   |   |             |                                                                                |              |    |
|---|---|-------------|--------------------------------------------------------------------------------|--------------|----|
| √ | √ | IPI00020996 | Insulin-like growth factor-binding protein complex acid labile chain precursor | IGFALS       | 20 |
| √ | √ | IPI00783399 | Isoform 1 of Transmembrane protein 132D precursor                              | TMEM132D     | 20 |
|   | √ | IPI00160552 | Isoform 1 of Tenascin-R precursor                                              | TNR          | 20 |
|   | √ | IPI00294004 | Vitamin K-dependent protein S precursor                                        | PROS1        | 20 |
|   | √ | IPI00301865 | Isoform 1 of Transmembrane protein 132A precursor                              | TMEM132A     | 20 |
| √ |   | IPI00216697 | Isoform Er1 of Ankyrin-1                                                       | ANK1         | 20 |
| √ |   | IPI00440577 | IGKV2-24 protein                                                               | IGKV2-24     | 20 |
| √ |   | IPI00061977 | IGHA1 protein                                                                  | IGHV3OR16-13 | 20 |
| √ |   | IPI00855725 | Isoform 4 of Trans-Golgi network integral membrane protein 2 precursor         | TGOLN2       | 20 |
| √ | √ | IPI00020986 | Lumican precursor                                                              | LUM          | 19 |
| √ | √ | IPI00297646 | Collagen alpha-1(I) chain precursor                                            | COL1A1       | 19 |
| √ | √ | IPI00845354 | IGKC protein                                                                   | IGKC         | 19 |
| √ | √ | IPI00169383 | Phosphoglycerate kinase 1                                                      | PGK1         | 19 |
| √ | √ | IPI00004669 | Polypeptide N-acetylgalactosaminyltransferase 2                                | GALNT2       | 19 |
| √ | √ | IPI00022426 | AMBP protein precursor                                                         | AMBP         | 19 |
| √ | √ | IPI00022284 | Major prion protein precursor                                                  | PRNP         | 19 |
| √ | √ | IPI00328609 | Kallistatin precursor                                                          | SERPINA4     | 19 |
| √ | √ | IPI00219365 | Moesin                                                                         | MSN          | 19 |
| √ | √ | IPI00006662 | Apolipoprotein D precursor                                                     | APOD         | 19 |
| √ | √ | IPI00004656 | Beta-2-microglobulin                                                           | B2M          | 19 |
| √ | √ | IPI00021891 | Isoform Gamma-B of Fibrinogen gamma chain precursor                            | FGG          | 19 |
| √ | √ | IPI00018136 | Isoform 1 of Vascular cell adhesion protein 1 precursor                        | VCAM1        | 19 |
|   | √ | IPI00001662 | Opioid-binding protein/cell adhesion molecule precursor                        | OPCML        | 19 |
|   | √ | IPI00477747 | Isoform 1 of Follistatin-related protein 4 precursor                           | FSTL4        | 19 |
|   | √ | IPI00183445 | Isoform 1 of Latrophilin-1 precursor                                           | LPHN1        | 19 |
|   |   | IPI00784985 | IGK@ protein                                                                   | IGK@         | 19 |
|   |   | IPI00334667 | Isoform 2 of Receptor-type tyrosine-protein phosphatase N2 precursor           | PTPRN2       | 19 |
|   |   | IPI00784969 | Putative uncharacterized protein                                               | LOC100126583 | 19 |
|   |   | IPI00785067 | IGH@ protein                                                                   | IGH@         | 19 |
| √ | √ | IPI00430808 | Immunoglobulin light chain (Fragment)                                          | IGKC         | 18 |
| √ | √ | IPI00477597 | Isoform 1 of Haptoglobin-related protein precursor                             | HPR          | 18 |
| √ | √ | IPI00301579 | Epididymal secretory protein E1 precursor                                      | NPC2         | 18 |
| √ | √ | IPI00290085 | Cadherin-2 precursor                                                           | CDH2         | 18 |
| √ | √ | IPI00022371 | Histidine-rich glycoprotein precursor                                          | HRG          | 18 |
| √ | √ | IPI00176221 | Neuronal growth regulator 1 precursor                                          | NEGR1        | 18 |
| √ | √ | IPI00480183 | Protein                                                                        | PTPRF        | 18 |
|   | √ | IPI00855824 | dipeptidyl-peptidase 6 isoform 3                                               | DPP6         | 18 |
|   | √ | IPI00289083 | Isoform 1 of VWFA and cache domain-containing protein 1 precursor              | CACHD1       | 18 |
|   | √ | IPI00016422 | Netrin receptor DCC precursor                                                  | DCC          | 18 |
|   | √ | IPI00000779 | Isoform 1 of ADAM 22 precursor                                                 | ADAM22       | 18 |

|   |             |                                                                                      |                                                                                  |          |    |
|---|-------------|--------------------------------------------------------------------------------------|----------------------------------------------------------------------------------|----------|----|
|   | IPI00784830 | CDNA FLJ41981 fis, clone SMINT2011888, highly similar to Protein Tro alpha1 H,myelon | LOC100126583                                                                     | 18       |    |
|   | IPI00784758 | Putative uncharacterized protein DKFZp686M08189                                      | LOC100126583                                                                     | 18       |    |
| √ | √           | IPI00021854                                                                          | Apolipoprotein A-II precursor                                                    | APOA2    | 17 |
| √ | √           | IPI00298281                                                                          | Laminin subunit gamma-1 precursor                                                | LAMC1    | 17 |
| √ | √           | IPI00008787                                                                          | Alpha-N-acetylglucosaminidase precursor                                          | NAGLU    | 17 |
| √ | √           | IPI00028911                                                                          | Dystroglycan precursor                                                           | DAG1     | 17 |
| √ | √           | IPI00166729                                                                          | alpha-2-glycoprotein 1, zinc                                                     | AZGP1    | 17 |
| √ | √           | IPI00022417                                                                          | Leucine-rich alpha-2-glycoprotein precursor                                      | LRG1     | 17 |
| √ | √           | IPI00022431                                                                          | Alpha-2-HS-glycoprotein precursor                                                | AHSG     | 17 |
| √ | √           | IPI00010154                                                                          | Rab GDP dissociation inhibitor alpha                                             | GDI1     | 17 |
| √ | √           | IPI00009028                                                                          | Tetranectin precursor                                                            | CLEC3B   | 17 |
| √ | √           | IPI00746963                                                                          | IGKC protein                                                                     | IGKC     | 17 |
| √ | √           | IPI00003590                                                                          | Isoform 1 of Sulfhydryl oxidase 1 precursor                                      | QSOX1    | 17 |
| √ | √           | IPI00027827                                                                          | Extracellular superoxide dismutase [Cu-Zn] precursor                             | SOD3     | 17 |
| √ | √           | IPI00219217                                                                          | L-lactate dehydrogenase B chain                                                  | LDHB     | 17 |
| √ | √           | IPI00465248                                                                          | Isoform alpha-enolase of Alpha-enolase                                           | ENO1     | 17 |
| √ | √           | IPI00792115                                                                          | Putative uncharacterized protein DKFZp686H17246                                  | CLEC3B   | 17 |
| √ | √           | IPI00410600                                                                          | Isoform 3 of Voltage-dependent calcium channel subunit alpha-2/delta-2 precursor | CACNA2D2 | 17 |
| √ | √           | IPI00298237                                                                          | Isoform 1 of Tripeptidyl-peptidase 1 precursor                                   | TPP1     | 17 |
| √ | √           | IPI00419722                                                                          | seizure related 6 homolog (mouse)-like 2 isoform 2                               | SEZ6L2   | 17 |
|   | √           | IPI00879665                                                                          | 112 kDa protein                                                                  | SEZ6L    | 17 |
|   | √           | IPI00028908                                                                          | Nidogen-2 precursor                                                              | NID2     | 17 |
|   | √           | IPI00252731                                                                          | Isoform DPPX-S of Dipeptidyl aminopeptidase-like protein 6                       | DPP6     | 17 |
| √ |             | IPI00012585                                                                          | Beta-hexosaminidase beta chain precursor                                         | HEXB     | 17 |
| √ |             | IPI00021304                                                                          | Keratin, type II cytoskeletal 2 epidermal                                        | KRT2     | 17 |
| √ |             | IPI00299024                                                                          | Brain acid soluble protein 1                                                     | BASP1    | 17 |
|   |             | IPI00784773                                                                          | Putative uncharacterized protein                                                 | -        | 17 |
|   |             | IPI00784865                                                                          | IGK@ protein                                                                     | IGK@     | 17 |
|   |             | IPI00008603                                                                          | Actin, aortic smooth muscle                                                      | ACTA2    | 17 |
| √ | √           | IPI00020599                                                                          | Calreticulin precursor                                                           | CALR     | 16 |
| √ | √           | IPI00472961                                                                          | IGKC protein                                                                     | IGKC     | 16 |
| √ | √           | IPI00011651                                                                          | Isoform 1 of Receptor-type tyrosine-protein phosphatase gamma precursor          | PTPRG    | 16 |
| √ | √           | IPI00027851                                                                          | Beta-hexosaminidase alpha chain precursor                                        | HEXA     | 16 |
| √ | √           | IPI00396423                                                                          | Alcadein beta                                                                    | CLSTN3   | 16 |
| √ | √           | IPI00295741                                                                          | Cathepsin B precursor                                                            | CTSB     | 16 |
| √ | √           | IPI00853045                                                                          | Anti-RhD monoclonal T125 kappa light chain precursor                             | IGKC     | 16 |
| √ | √           | IPI00289819                                                                          | Cation-independent mannose-6-phosphate receptor precursor                        | IGF2R    | 16 |
| √ | √           | IPI00011252                                                                          | Complement component C8 alpha chain precursor                                    | C8A      | 16 |
| √ | √           | IPI00015688                                                                          | Glypican-1 precursor                                                             | GPC1     | 16 |
| √ | √           | IPI00020091                                                                          | Alpha-1-acid glycoprotein 2 precursor                                            | ORM2     | 16 |



|   |   |             |                                                                             |          |    |
|---|---|-------------|-----------------------------------------------------------------------------|----------|----|
| √ | √ | IPI00854806 | IGKV1-5 protein                                                             | IGKV1-5  | 16 |
| √ | √ | IPI00022429 | Alpha-1-acid glycoprotein 1 precursor                                       | ORM1     | 16 |
| √ | √ | IPI00014572 | SPARC precursor                                                             | SPARC    | 16 |
| √ | √ | IPI00013303 | Limbic system-associated membrane protein precursor                         | LSAMP    | 16 |
| √ | √ | IPI00022420 | Plasma retinol-binding protein precursor                                    | RBP4     | 16 |
| √ | √ | IPI00298793 | Beta-mannosidase precursor                                                  | MANBA    | 16 |
| √ | √ | IPI00001952 | Endonuclease domain-containing 1 protein precursor                          | ENDOD1   | 16 |
| √ | √ | IPI00152540 | Isoform 1 of CD109 antigen precursor                                        | CD109    | 16 |
| √ | √ | IPI00027848 | Macrophage mannose receptor 1 precursor                                     | MRC1     | 16 |
| √ | √ | IPI00643034 | Isoform 1 of Phospholipid transfer protein precursor                        | PLTP     | 16 |
|   | √ | IPI00026946 | Neuronal pentraxin-2 precursor                                              | NPTX2    | 16 |
|   | √ | IPI00166766 | hypothetical protein LOC146556 isoform 2                                    | MGC45438 | 16 |
|   | √ | IPI00154734 | seizure related 6 homolog isoform 1                                         | SEZ6     | 16 |
|   | √ | IPI00410210 | Isoform 2 of Latrophilin-1 precursor                                        | LPHN1    | 16 |
|   | √ | IPI00008944 | Isoform 1 of Neuroendocrine protein 7B2 precursor                           | SCG5     | 16 |
| √ |   | IPI00384952 | Putative uncharacterized protein DKFZp686K04218 (Fragment)                  | -        | 16 |
|   |   | IPI00180240 | thymosin-like 3                                                             | TMSL3    | 16 |
| √ | √ | IPI00176458 | protocadherin 1 isoform 2 precursor                                         | PCDH1    | 15 |
| √ | √ | IPI00011218 | Macrophage colony-stimulating factor 1 receptor precursor                   | CSF1R    | 15 |
| √ | √ | IPI00292946 | Thyroxine-binding globulin precursor                                        | SERPINA7 | 15 |
| √ | √ | IPI00329775 | Isoform 1 of Carboxypeptidase B2 precursor                                  | CPB2     | 15 |
| √ | √ | IPI00024046 | Cadherin-13 precursor                                                       | CDH13    | 15 |
| √ | √ | IPI00221224 | Aminopeptidase N                                                            | ANPEP    | 15 |
| √ | √ | IPI00297124 | Isoform 1 of Interleukin-6 receptor subunit beta precursor                  | IL6ST    | 15 |
| √ | √ | IPI00297284 | Insulin-like growth factor-binding protein 2 precursor                      | IGFBP2   | 15 |
|   | √ | IPI00102543 | SLIT and NTRK-like protein 1 precursor                                      | SLITRK1  | 15 |
|   | √ | IPI00550162 | IGLV3-25 protein                                                            | IGLV3-25 | 15 |
|   | √ | IPI00165949 | Isoform 2 of Endoplasmic reticulum aminopeptidase 1                         | ERAP1    | 15 |
|   | √ | IPI00056478 | Isoform 1 of Immunoglobulin superfamily member 8 precursor                  | IGSF8    | 15 |
| √ |   | IPI00385264 | Ig mu heavy chain disease protein                                           | -        | 15 |
| √ |   | IPI00418471 | Vimentin                                                                    | VIM      | 15 |
| √ |   | IPI00178302 | Isoform 4 of Semaphorin-6D precursor                                        | SEMA6D   | 15 |
|   |   | IPI00465016 | Isoform 2 of Sulfhydryl oxidase 1 precursor                                 | QSOX1    | 15 |
| √ | √ | IPI00104074 | Isoform 1 of Scavenger receptor cysteine-rich type 1 protein M130 precursor | CD163    | 14 |
| √ | √ | IPI00012887 | Cathepsin L1 precursor                                                      | CTSL1    | 14 |
| √ | √ | IPI00219446 | Phosphatidylethanolamine-binding protein 1                                  | PEBP1    | 14 |
| √ | √ | IPI00154742 | IGL@ protein                                                                | IGL@     | 14 |
| √ | √ | IPI00009950 | Vesicular integral-membrane protein VIP36 precursor                         | LMAN2    | 14 |
| √ | √ | IPI00012303 | Selenium-binding protein 1                                                  | SELENBP1 | 14 |
| √ | √ | IPI00829626 | IGL@ protein                                                                | IGL@     | 14 |

|   |    |             |                                                                                 |           |    |
|---|----|-------------|---------------------------------------------------------------------------------|-----------|----|
| √ | √  | IPI00005794 | 60 kDa protein                                                                  | PGCP      | 14 |
| √ | √  | IPI00295832 | Oligodendrocyte-myelin glycoprotein precursor                                   | OMG       | 14 |
| √ | √  | IPI00004440 | Receptor-type tyrosine-protein phosphatase-like N precursor                     | PTPRN     | 14 |
| √ | √  | IPI00030255 | Procollagen-lysine,2-oxoglutarate 5-dioxygenase 3 precursor                     | PLOD3     | 14 |
| √ | √  | IPI00027350 | Peroxiredoxin-2                                                                 | PRDX2     | 14 |
| √ | √  | IPI00291005 | Malate dehydrogenase, cytoplasmic                                               | MDH1      | 14 |
| √ | √  | IPI00292791 | Contactin-3 precursor                                                           | CNTN3     | 14 |
| √ | √  | IPI00027192 | Procollagen-lysine,2-oxoglutarate 5-dioxygenase 1 precursor                     | PLOD1     | 14 |
| √ | √  | IPI00296141 | Dipeptidyl-peptidase 2 precursor                                                | DPP7      | 14 |
| √ | √  | IPI00794070 | CFI protein                                                                     | CFI       | 14 |
| √ | √  | IPI00009802 | Isoform V0 of Versican core protein precursor                                   | VCAN      | 14 |
| √ | √  | IPI00465184 | Guanine deaminase                                                               | GDA       | 14 |
|   | √  | IPI00795013 | 149 kDa protein                                                                 | LPHN3     | 14 |
|   | √  | IPI00385980 | ROBO2 isoform a                                                                 | ROBO2     | 14 |
|   | √  | IPI00218046 | Heparan-sulfate 6-O-sulfotransferase 3                                          | HS6ST3    | 14 |
|   | √  | IPI00022337 | Interphotoreceptor retinoid-binding protein precursor                           | RBP3      | 14 |
|   | √  | IPI00103175 | Isoform 1 of Soluble calcium-activated nucleotidase 1                           | CANT1     | 14 |
| √ |    | IPI00009865 | Keratin, type I cytoskeletal 10                                                 | KRT10     | 14 |
|   |    | IPI00552905 | Isoform 1 of Proline-rich transmembrane protein 3 precursor                     | PRRT3     | 14 |
|   |    | IPI00787853 | Inositol monophosphatase 3                                                      | IMPAD1    | 14 |
|   | √* | IPI00000130 | Somatostatin precursor                                                          | SST       | 13 |
| √ | √  | IPI00829877 | IGL@ protein                                                                    | IGL@      | 13 |
| √ | √  | IPI00013698 | Acid ceramidase precursor                                                       | ASAH1     | 13 |
| √ | √  | IPI00011264 | Complement factor H-related protein 1 precursor                                 | CFHR1     | 13 |
| √ | √  | IPI00163563 | PEBP family protein precursor                                                   | PEBP4     | 13 |
| √ | √  | IPI00328391 | N-acetylgalactosaminyltransferase 7                                             | GALNT7    | 13 |
| √ | √  | IPI00026216 | Puromycin-sensitive aminopeptidase                                              | NPEPPS    | 13 |
| √ | √  | IPI00783492 | Isoform 2 of Latent-transforming growth factor beta-binding protein 4 precursor | LTBP4     | 13 |
| √ | √  | IPI00816626 | PLXNB2 protein                                                                  | PLXNB2    | 13 |
| √ | √  | IPI00027230 | Endoplasmin precursor                                                           | HSP90B1   | 13 |
| √ | √  | IPI00290283 | mannan-binding lectin serine protease 1 isoform 2 precursor                     | MASP1     | 13 |
| √ | √  | IPI00376689 | Isoform 1 of Protein KIAA1199 precursor                                         | KIAA1199  | 13 |
| √ | √  | IPI00419724 | semaphorin 4B precursor                                                         | SEMA4B    | 13 |
| √ | √  | IPI00218732 | Serum paraoxonase/arylesterase 1                                                | PON1      | 13 |
| √ | √  | IPI00021263 | 14-3-3 protein zeta/delta                                                       | YWHAZ     | 13 |
| √ | √  | IPI00031461 | Rab GDP dissociation inhibitor beta                                             | GDI2      | 13 |
|   | √  | IPI00293836 | Isoform 3 of Cell adhesion molecule 2 precursor                                 | CADM2     | 13 |
|   | √  | IPI00220334 | Isoform 3 of Seizure 6-like protein precursor                                   | SEZ6L     | 13 |
|   | √  | IPI00176427 | Cell adhesion molecule 4 precursor                                              | CADM4     | 13 |
|   | √  | IPI00410714 | Hemoglobin subunit alpha                                                        | HBA2;HBA1 | 13 |

|   |   |             |                                                                            |             |    |
|---|---|-------------|----------------------------------------------------------------------------|-------------|----|
| √ |   | IPI00220327 | Keratin, type II cytoskeletal 1                                            | KRT1        | 13 |
| √ |   | IPI00022361 | Band 3 anion transport protein                                             | SLC4A1      | 13 |
| √ |   | IPI00012989 | Lysosomal alpha-mannosidase precursor                                      | MAN2B1      | 13 |
| √ |   | IPI00152418 | Decay-accelerating factor splicing variant 4                               | CD55        | 13 |
| √ |   | IPI00001593 | Lysosomal Pro-X carboxypeptidase precursor                                 | PRCP        | 13 |
| √ |   | IPI00166392 | Immunoglobulin superfamily member 4                                        | CADM1       | 13 |
|   |   | IPI00304925 | Heat shock 70 kDa protein 1                                                | HSPA1A;HSPA | 13 |
|   |   | IPI00784519 | Putative uncharacterized protein                                           | -           | 13 |
|   |   | IPI00382938 | IGLV4-3 protein                                                            | IGLV4-3     | 13 |
|   |   | IPI00785200 | Putative uncharacterized protein                                           | -           | 13 |
| √ | √ | IPI00012440 | Plasma alpha-L-fucosidase precursor                                        | FUCA2       | 12 |
| √ | √ | IPI00289204 | Reticulon-4 receptor precursor                                             | RTN4R       | 12 |
| √ | √ | IPI00418446 | N-acylsphingosine amidohydrolase (acid ceramidase) 1 isoform b             | ASAH1       | 12 |
| √ | √ | IPI00654755 | Hemoglobin subunit beta                                                    | HBB         | 12 |
| √ | √ | IPI00015881 | Isoform 1 of Macrophage colony-stimulating factor 1 precursor              | CSF1        | 12 |
| √ | √ | IPI00787781 | similar to Metalloproteinase inhibitor 2 precursor                         | TIMP2       | 12 |
| √ | √ | IPI00026104 | Isoform Long of Iduronate 2-sulfatase precursor                            | IDS         | 12 |
| √ | √ | IPI00000816 | 14-3-3 protein epsilon                                                     | YWHAE       | 12 |
| √ | √ | IPI00793166 | 15 kDa protein                                                             | SPARCL1     | 12 |
| √ | √ | IPI00299738 | Procollagen C-endopeptidase enhancer 1 precursor                           | PCOLCE      | 12 |
| √ | √ | IPI00022822 | Isoform 2 of Collagen alpha-1(XVIII) chain precursor                       | COL18A1     | 12 |
| √ | √ | IPI00218413 | biotinidase precursor                                                      | BTD         | 12 |
| √ | √ | IPI00019581 | Coagulation factor XII precursor                                           | F12         | 12 |
| √ | √ | IPI00006967 | Protocadherin-9 precursor                                                  | PCDH9       | 12 |
| √ | √ | IPI00019576 | Coagulation factor X precursor                                             | F10         | 12 |
| √ | √ | IPI00028413 | Isoform 1 of Inter-alpha-trypsin inhibitor heavy chain H3 precursor        | ITIH3       | 12 |
| √ | √ | IPI00167093 | complement factor H-related 1                                              | CFHR1       | 12 |
| √ | √ | IPI00018236 | Ganglioside GM2 activator precursor                                        | GM2A        | 12 |
| √ | √ | IPI00877029 | FGA protein                                                                | FGA         | 12 |
| √ | √ | IPI00027166 | Metalloproteinase inhibitor 2 precursor                                    | TIMP2       | 12 |
| √ | √ | IPI00411680 | Isoform 1 of Protein-L-isoaspartate(D-aspartate) O-methyltransferase       | PCMT1       | 12 |
| √ | √ | IPI00852979 | hypothetical protein LOC25758                                              | C11orf41    | 12 |
|   | √ | IPI00414984 | sarcoglycan, epsilon isoform 1                                             | SGCE        | 12 |
|   | √ | IPI00791228 | glutamate receptor, ionotropic, AMPA 4 isoform 3 precursor                 | GRIA4       | 12 |
|   | √ | IPI00162547 | latrophilin 3 precursor                                                    | LPHN3       | 12 |
|   | √ | IPI00022608 | Sortilin-related receptor precursor                                        | SORL1       | 12 |
|   | √ | IPI00024570 | Semaphorin-3G precursor                                                    | SEMA3G      | 12 |
|   | √ | IPI00008994 | Isoform 1 of Protein NDRG2                                                 | NDRG2       | 12 |
| √ |   | IPI00157414 | Ectonucleotide pyrophosphatase/phosphodiesterase family member 6 precursor | ENPP6       | 12 |
| √ |   | IPI00443799 | hypothetical protein LOC124565 isoform a                                   | MGC15523    | 12 |

|   |   |             |                                                                                  |             |    |
|---|---|-------------|----------------------------------------------------------------------------------|-------------|----|
| √ |   | IPI00746623 | Hyaluronan-binding protein 2 precursor                                           | HABP2       | 12 |
| √ |   | IPI00829711 | Uncharacterized protein IGHA2 (Fragment)                                         | IGHA2       | 12 |
|   |   | IPI00785196 | Putative uncharacterized protein                                                 | -           | 12 |
|   |   | IPI00743302 | intercellular adhesion molecule 5 precursor                                      | ICAM5       | 12 |
|   |   | IPI00032063 | Similar to Candidate tumor suppressor protein                                    | LRP1B       | 12 |
|   |   | IPI00301395 | Probable serine carboxypeptidase CPVL precursor                                  | CPVL        | 12 |
| √ | √ | IPI00328746 | Reticulon-4 receptor-like 2 precursor                                            | RTN4RL2     | 11 |
| √ | √ | IPI00298388 | Isoform 1 of Phosphoinositide-3-kinase-interacting protein 1 precursor           | PIK3IP1     | 11 |
| √ | √ | IPI00026154 | Glucosidase 2 subunit beta precursor                                             | PRKCSH      | 11 |
| √ | √ | IPI00217966 | Isoform 1 of L-lactate dehydrogenase A chain                                     | LDHA        | 11 |
| √ | √ | IPI00014048 | Ribonuclease pancreatic precursor                                                | RNASE1      | 11 |
| √ | √ | IPI00023728 | Gamma-glutamyl hydrolase precursor                                               | GGH         | 11 |
| √ | √ | IPI00015315 | Extracellular matrix protein 2 precursor                                         | ECM2        | 11 |
| √ | √ | IPI00247243 | 31 kDa protein                                                                   | -           | 11 |
| √ | √ | IPI00216318 | Isoform Long of 14-3-3 protein beta/alpha                                        | YWHAB       | 11 |
| √ | √ | IPI00293748 | Isoform 1 of Multiple inositol polyphosphate phosphatase 1 precursor             | MINPP1      | 11 |
| √ | √ | IPI00829640 | IGL@ protein                                                                     | IGL@        | 11 |
| √ | √ | IPI00027493 | 4F2 cell-surface antigen heavy chain                                             | SLC3A2;LOC4 | 11 |
| √ | √ | IPI00026199 | Glutathione peroxidase 3 precursor                                               | GPX3        | 11 |
| √ | √ | IPI00646304 | peptidylprolyl isomerase B precursor                                             | PPIB        | 11 |
| √ | √ | IPI00029693 | Isoform A22 of Neuropilin-2 precursor                                            | NRP2        | 11 |
| √ | √ | IPI00877169 | calcium/calmodulin-dependent protein kinase IIA isoform 2                        | CAMK2A      | 11 |
| √ | √ | IPI00010949 | Isoform 1 of Sialate O-acetylerase precursor                                     | SIAE        | 11 |
|   | √ | IPI00220342 | N(G),N(G)-dimethylarginine dimethylaminohydrolase 1                              | DDAH1       | 11 |
|   | √ | IPI00718977 | glutamate receptor, ionotropic, AMPA 4 isoform 2 precursor                       | GRIA4       | 11 |
|   | √ | IPI00302181 | Isoform 1 of Voltage-dependent calcium channel subunit alpha-2/delta-3 precursor | CACNA2D3    | 11 |
|   | √ | IPI00465325 | leucine-rich repeat neuronal 6A                                                  | LINGO1      | 11 |
|   | √ | IPI00337548 | Cell growth regulator with EF hand domain protein 1                              | CGREF1      | 11 |
| √ |   | IPI00032532 | Isoform 2 of Growth arrest-specific protein 6 precursor                          | GAS6        | 11 |
| √ |   | IPI00643920 | Transketolase                                                                    | TKT         | 11 |
| √ |   | IPI00743766 | Fetuin-B precursor                                                               | FETUB       | 11 |
| √ |   | IPI00000877 | Hypoxia up-regulated protein 1 precursor                                         | HYOU1       | 11 |
| √ |   | IPI00423461 | Putative uncharacterized protein DKFZp686C02220 (Fragment)                       | IGHA2       | 11 |
| √ |   | IPI00219526 | Isoform 1 of Phosphoglucomutase-1                                                | PGM1        | 11 |
| √ |   | IPI00783665 | Laminin subunit alpha-5 precursor                                                | LAMA5       | 11 |
|   |   | IPI00012102 | N-acetylglucosamine-6-sulfatase precursor                                        | GNS         | 11 |
|   |   | IPI00003921 | Isoform 1 of Protein 4.1                                                         | EPB41       | 11 |
| √ | √ | IPI00011261 | Complement component C8 gamma chain precursor                                    | C8G         | 10 |
| √ | √ | IPI00879084 | 20 kDa protein                                                                   | CP          | 10 |
| √ | √ | IPI00029235 | Insulin-like growth factor-binding protein 6 precursor                           | IGFBP6      | 10 |

|   |   |             |                                                                           |          |    |
|---|---|-------------|---------------------------------------------------------------------------|----------|----|
| √ | √ | IPI00395488 | Vasorin precursor                                                         | VASN     | 10 |
| √ | √ | IPI00298994 | Talin-1                                                                   | TLN1     | 10 |
| √ | √ | IPI00010471 | Plastin-2                                                                 | LCP1     | 10 |
| √ | √ | IPI00298547 | Protein DJ-1                                                              | PARK7    | 10 |
| √ | √ | IPI00220642 | 14-3-3 protein gamma                                                      | YWHAG    | 10 |
| √ | √ | IPI00843910 | Tissue alpha-L-fucosidase precursor                                       | FUCA1    | 10 |
| √ | √ | IPI00002211 | Isoform 2 of Semaphorin-6A precursor                                      | SEMA6A   | 10 |
| √ | √ | IPI00418531 | Isoform 1 of Gliomedin                                                    | GLDN     | 10 |
| √ | √ | IPI00025426 | Pregnancy zone protein precursor                                          | PZP      | 10 |
| √ | √ | IPI00022331 | Phosphatidylcholine-sterol acyltransferase precursor                      | LCAT     | 10 |
| √ | √ | IPI00010796 | Protein disulfide-isomerase precursor                                     | P4HB     | 10 |
| √ | √ | IPI00009793 | Complement C1r-like protein                                               | C1RL     | 10 |
| √ | √ | IPI00297263 | Isoform 1 of Protein HEG homolog 1 precursor                              | HEG1     | 10 |
| √ | √ | IPI00871139 | 92 kDa protein                                                            | MASP1    | 10 |
|   | √ | IPI00784156 | Isoform 1 of AP-2 complex subunit beta-1                                  | AP2B1    | 10 |
|   | √ | IPI00103597 | Isoform 1 of VPS10 domain-containing receptor SorCS1 precursor            | SORCS1   | 10 |
|   | √ | IPI00176193 | Isoform 1 of Collagen alpha-1(XIV) chain precursor                        | COL14A1  | 10 |
|   | √ | IPI00456736 | Isoform 1 of RGM domain family member B precursor                         | RGMB     | 10 |
|   | √ | IPI00010381 | VPS10 domain-containing receptor SorCS3 precursor                         | SORCS3   | 10 |
|   | √ | IPI00003919 | Glutaminy-peptide cyclotransferase precursor                              | QPCT     | 10 |
|   | √ | IPI00007236 | Isoform 2 of Neuroligin-1 precursor                                       | NLGN1    | 10 |
| √ |   | IPI00296176 | Coagulation factor IX precursor                                           | F9       | 10 |
| √ |   | IPI00163187 | Fascin                                                                    | FSCN1    | 10 |
| √ |   | IPI00304962 | Collagen alpha-2(I) chain precursor                                       | COL1A2   | 10 |
| √ |   | IPI00292550 | Isoform 1 of Polypeptide N-acetylgalactosaminyltransferase 13             | GALNT13  | 10 |
| √ |   | IPI00027497 | Glucose-6-phosphate isomerase                                             | GPI      | 10 |
|   |   | IPI00815938 | IGLV3-21 protein                                                          | IGLV3-21 | 10 |
|   |   | IPI00816555 | IGLV2-14 protein                                                          | IGLV2-14 | 10 |
|   |   | IPI00015964 | Neuromodulin                                                              | GAP43    | 10 |
|   |   | IPI00299299 | Stress 70 protein chaperone microsome-associated 60 kDa protein precursor | STCH     | 10 |
| √ | √ | IPI00301459 | 1-O-acylceramide synthase precursor                                       | LYPLA3   | 9  |
| √ | √ | IPI00290856 | Lymphatic vessel endothelial hyaluronic acid receptor 1 precursor         | LYVE1    | 9  |
| √ | √ | IPI00029723 | Follistatin-related protein 1 precursor                                   | FSTL1    | 9  |
| √ | √ | IPI00297487 | Cathepsin H precursor                                                     | CTSH     | 9  |
| √ | √ | IPI00027482 | Corticosteroid-binding globulin precursor                                 | SERPINA6 | 9  |
| √ | √ | IPI00215983 | Carbonic anhydrase 1                                                      | CA1      | 9  |
| √ | √ | IPI00790473 | 12 kDa protein                                                            | SERPINF1 | 9  |
| √ | √ | IPI00000137 | N-acetylglucosamine-1-phosphotransferase subunit gamma precursor          | GNPTG    | 9  |
| √ | √ | IPI00477992 | complement component 1, q subcomponent, B chain precursor                 | C1QB     | 9  |
| √ | √ | IPI00015756 | Isoform 1 of Receptor-type tyrosine-protein phosphatase kappa precursor   | PTPRK    | 9  |

|   |   |             |                                                                             |           |   |
|---|---|-------------|-----------------------------------------------------------------------------|-----------|---|
| √ | √ | IPI00002816 | Cathepsin F precursor                                                       | CTSF      | 9 |
| √ | √ | IPI00023014 | von Willebrand factor precursor                                             | VWF       | 9 |
| √ | √ | IPI00021485 | Leucine-rich repeat neuronal protein 1 precursor                            | LRRN1     | 9 |
| √ | √ | IPI00293088 | Lysosomal alpha-glucosidase precursor                                       | GAA       | 9 |
| √ | √ | IPI00020990 | Osteomodulin precursor                                                      | OMD       | 9 |
| √ | √ | IPI00745660 | IGL@ protein                                                                | IGL@      | 9 |
| √ | √ | IPI00414896 | Isoform 1 of Ribonuclease T2 precursor                                      | RNASET2   | 9 |
| √ | √ | IPI00023019 | Isoform 1 of Sex hormone-binding globulin precursor                         | SHBG      | 9 |
| √ | √ | IPI00002732 | EXTL2 protein (Fragment)                                                    | EXTL2     | 9 |
| √ | √ | IPI00007221 | Plasma serine protease inhibitor precursor                                  | SERPINA5  | 9 |
| √ | √ | IPI00018769 | Thrombospondin-2 precursor                                                  | THBS2     | 9 |
| √ | √ | IPI00788786 | 309 kDa protein                                                             | VWF       | 9 |
| √ | √ | IPI00064607 | Isoform 1 of Multiple epidermal growth factor-like domains 10 precursor     | MEGF10    | 9 |
| √ | √ | IPI00216691 | Profilin-1                                                                  | PFN1      | 9 |
| √ | √ | IPI00005142 | Isoform 1 of Basic fibroblast growth factor receptor 1 precursor            | FGFR1     | 9 |
| √ | √ | IPI00001611 | Isoform 1 of Insulin-like growth factor II precursor                        | IGF2      | 9 |
| √ | √ | IPI00000874 | Peroxiredoxin-1                                                             | PRDX1     | 9 |
| √ | √ | IPI00163446 | IGHD protein                                                                | IGHD      | 9 |
| √ | √ | IPI00027038 | Isoform 1 of V-set and immunoglobulin domain-containing protein 4 precursor | VSIG4     | 9 |
| √ | √ | IPI00013682 | Isoform 3 of Ecto-ADP-ribosyltransferase 3 precursor                        | ART3      | 9 |
| √ | √ | IPI00745363 | Immunoglobulin heavy chain variable region (Fragment)                       | LOC652113 | 9 |
| √ | √ | IPI00106646 | 45 kDa calcium-binding protein precursor                                    | SDF4      | 9 |
| √ | √ | IPI00005292 | Testican-1 precursor                                                        | SPOCK1    | 9 |
| √ | √ | IPI00292150 | Latent-transforming growth factor beta-binding protein 2 precursor          | LTBP2     | 9 |
| √ | √ | IPI00514676 | myelin oligodendrocyte glycoprotein isoform beta2 precursor                 | MOG       | 9 |
| √ | √ | IPI00376394 | Sulfhydryl oxidase 2 precursor                                              | QSOX2     | 9 |
| √ | √ | IPI00008087 | Follistatin-related protein 5 precursor                                     | FSTL5     | 9 |
| √ | √ | IPI00014592 | Chondroadherin precursor                                                    | CHAD      | 9 |
| √ | √ | IPI00183487 | Xylosyltransferase 1                                                        | XYLT1     | 9 |
| √ | √ | IPI00024621 | Isoform 1 of Olfactomedin-like protein 3 precursor                          | OLFML3    | 9 |
| √ |   | IPI00015902 | Beta-type platelet-derived growth factor receptor precursor                 | PDGFRB    | 9 |
| √ |   | IPI00303071 | Cat eye syndrome critical region protein 1 precursor                        | CECR1     | 9 |
| √ |   | IPI00470607 | family with sequence similarity 20, member C                                | FAM20C    | 9 |
| √ |   | IPI00011454 | Isoform 2 of Neutral alpha-glucosidase AB precursor                         | GANAB     | 9 |
| √ |   | IPI00025110 | Isoform 2 of Mesothelin precursor                                           | MSLN      | 9 |
| √ |   | IPI00291175 | Isoform 1 of Vinculin                                                       | VCL       | 9 |
| √ |   | IPI00220292 | Isoform 1 of Ecto-ADP-ribosyltransferase 3 precursor                        | ART3      | 9 |
| √ |   | IPI00009123 | Nucleobindin-2 precursor                                                    | NUCB2     | 9 |
| √ |   | IPI00299571 | Isoform 2 of Protein disulfide-isomerase A6 precursor                       | PDIA6     | 9 |
| √ |   | IPI00002406 | Lutheran blood group glycoprotein precursor                                 | BCAM      | 9 |

|   |             |                                                                                 |                                                                                  |              |   |
|---|-------------|---------------------------------------------------------------------------------|----------------------------------------------------------------------------------|--------------|---|
|   | IPI00785079 | Putative uncharacterized protein                                                | -                                                                                | 9            |   |
|   | IPI00852577 | IGLC1 protein                                                                   | IGLC1                                                                            | 9            |   |
|   | IPI00871326 | plexin A1                                                                       | PLXNA1                                                                           | 9            |   |
|   | IPI00001477 | Isoform 1 of Epithelial discoidin domain-containing receptor 1 precursor        | DDR1                                                                             | 9            |   |
|   | IPI00795055 | CDNA FLJ14022 fis, clone HEMBA1003538, weakly similar to COMPLEMENT C1R COM C1R | C1RL                                                                             | 9            |   |
|   | IPI00011654 | Tubulin beta chain                                                              | TUBB                                                                             | 9            |   |
| √ | √           | IPI00005707                                                                     | Macrophage mannose receptor 2 precursor                                          | MRC2         | 8 |
| √ | √           | IPI00883772                                                                     | acid alpha-glucosidase preproprotein                                             | GAA          | 8 |
| √ | √           | IPI00302592                                                                     | filamin A, alpha isoform 1                                                       | FLNA         | 8 |
| √ | √           | IPI00003865                                                                     | Isoform 1 of Heat shock cognate 71 kDa protein                                   | HSPA8        | 8 |
| √ | √           | IPI00003366                                                                     | Isoform TrkB of BDNF/NT-3 growth factors receptor precursor                      | NTRK2        | 8 |
| √ | √           | IPI00021033                                                                     | Isoform 1 of Collagen alpha-1(III) chain precursor                               | COL3A1       | 8 |
| √ | √           | IPI00010295                                                                     | Carboxypeptidase N catalytic chain precursor                                     | CPN1         | 8 |
| √ | √           | IPI00165438                                                                     | Muscle type neuropilin 1                                                         | NRP1         | 8 |
| √ | √           | IPI00219465                                                                     | Transcobalamin-2 precursor                                                       | TCN2         | 8 |
| √ | √           | IPI00002745                                                                     | Cathepsin Z precursor                                                            | CTSZ         | 8 |
| √ | √           | IPI00044369                                                                     | Isoform 1 of Plexin domain-containing protein 2 precursor                        | PLXDC2       | 8 |
| √ | √           | IPI00007778                                                                     | Di-N-acetylchitobiase precursor                                                  | CTBS         | 8 |
| √ | √           | IPI00022296                                                                     | Mast/stem cell growth factor receptor precursor                                  | KIT          | 8 |
| √ | √           | IPI00473011                                                                     | Hemoglobin subunit delta                                                         | HBB;HBD      | 8 |
| √ | √           | IPI00297224                                                                     | Sushi domain-containing protein 5                                                | SUSD5        | 8 |
| √ | √           | IPI00645206                                                                     | Isoform 1 of Protocadherin-17 precursor                                          | PCDH17       | 8 |
| √ | √           | IPI00219757                                                                     | Glutathione S-transferase P                                                      | GSTP1        | 8 |
| √ | √           | IPI00294705                                                                     | Papilin                                                                          | PAPLN        | 8 |
| √ | √           | IPI00032292                                                                     | Metalloproteinase inhibitor 1 precursor                                          | TIMP1        | 8 |
| √ | √           | IPI00217493                                                                     | Myoglobin                                                                        | MB           | 8 |
|   | √           | IPI00015346                                                                     | Cadherin EGF LAG seven-pass G-type receptor 2 precursor                          | CELSR2       | 8 |
|   | √           | IPI00455667                                                                     | hypothetical protein LOC402665                                                   | LOC402665    | 8 |
|   | √           | IPI00001895                                                                     | Isoform 1 of Protocadherin-8 precursor                                           | PCDH8        | 8 |
|   | √           | IPI00419585                                                                     | Peptidyl-prolyl cis-trans isomerase A                                            | PPIA;LOC6541 | 8 |
|   | √           | IPI00007798                                                                     | Thyrotropin-releasing hormone-degrading ectoenzyme                               | TRHDE        | 8 |
|   | √           | IPI00217146                                                                     | SLIT and NTRK-like protein 4 precursor                                           | SLITRK4      | 8 |
|   | √           | IPI00784119                                                                     | Vacuolar ATP synthase subunit S1 precursor                                       | ATP6AP1      | 8 |
|   | √           | IPI00008290                                                                     | Isoform 1 of Ephrin type-A receptor 5 precursor                                  | EPHA5        | 8 |
|   | √           | IPI00152847                                                                     | WAP, kazal, immunoglobulin, kunitz and NTR domain-containing protein 2 precursor | WFIKKN2      | 8 |
| √ |             | IPI00003269                                                                     | hypothetical protein LOC345651                                                   | DKFZp686D09  | 8 |
| √ |             | IPI00009904                                                                     | Protein disulfide-isomerase A4 precursor                                         | PDIA4        | 8 |
| √ |             | IPI00007752                                                                     | Tubulin beta-2C chain                                                            | TUBB2C       | 8 |
| √ |             | IPI00477804                                                                     | Immunoglobulin heavy chain variable region (Fragment)                            | -            | 8 |
| √ |             | IPI00328488                                                                     | Isoform 1 of Epididymis-specific alpha-mannosidase precursor                     | MAN2B2       | 8 |

|   |             |                                                                   |                                                                             |         |   |
|---|-------------|-------------------------------------------------------------------|-----------------------------------------------------------------------------|---------|---|
| √ | IPI00022810 | Dipeptidyl-peptidase 1 precursor                                  | CTSC                                                                        | 8       |   |
| √ | IPI00019906 | Isoform 2 of Basigin precursor                                    | BSG                                                                         | 8       |   |
|   | IPI00013475 | Tubulin beta-2A chain                                             | TUBB2A                                                                      | 8       |   |
|   | IPI00007702 | Heat shock-related 70 kDa protein 2                               | HSPA2                                                                       | 8       |   |
|   | IPI00329352 | Nodal modulator 1 precursor                                       | NOMO1;NOMC                                                                  | 8       |   |
|   | IPI00023598 | Tubulin beta-4 chain                                              | TUBB4                                                                       | 8       |   |
|   | IPI00292304 | Uncharacterized protein C9orf4                                    | C9orf4                                                                      | 8       |   |
|   | IPI00016870 | Zona pellucida sperm-binding protein 2 precursor                  | ZP2                                                                         | 8       |   |
|   | IPI00854743 | Uncharacterized protein ENSP00000375034                           | -                                                                           | 8       |   |
|   | IPI00220739 | Membrane-associated progesterone receptor component 1             | PGRMC1                                                                      | 8       |   |
|   | IPI00043756 | Isoform 3 of Zinc transporter ZIP12                               | SLC39A12                                                                    | 8       |   |
|   | IPI00293303 | Legumain precursor                                                | LGMN                                                                        | 8       |   |
|   | IPI00292732 | fibromodulin precursor                                            | FMOD                                                                        | 8       |   |
|   | IPI00827650 | Isoform 3 of CD44 antigen precursor                               | CD44                                                                        | 8       |   |
|   | IPI00021552 | UDP-GalNAc:beta-1,3-N-acetylgalactosaminyltransferase 1           | B3GALNT1                                                                    | 8       |   |
|   | IPI00028614 | erythrocyte membrane protein band 4.2 isoform 2                   | EPB42                                                                       | 8       |   |
|   | IPI00004962 | Golgi integral membrane protein 4                                 | GOLIM4                                                                      | 8       |   |
|   | IPI00440580 | Isoform 1 of Glycoprotein endo-alpha-1,2-mannosidase-like protein | MANEAL                                                                      | 8       |   |
|   | IPI00375205 | Isoform 1 of Polypeptide N-acetylgalactosaminyltransferase 10     | GALNT10                                                                     | 8       |   |
|   | IPI00432592 | 126 kDa protein                                                   | -                                                                           | 8       |   |
|   | √*          | IPI00031769                                                       | Esophageal cancer-related gene 4 protein precursor                          | C2orf40 | 7 |
|   | √*          | IPI00045841                                                       | Isoform 1 of Low-density lipoprotein receptor-related protein 11 precursor  | LRP11   | 7 |
| √ | √           | IPI00025864                                                       | Cholinesterase precursor                                                    | BCHE    | 7 |
| √ | √           | IPI00006644                                                       | Isoform 2 of Plexin-B1 precursor                                            | PLXNB1  | 7 |
| √ | √           | IPI00218493                                                       | Hypoxanthine-guanine phosphoribosyltransferase                              | HPRT1   | 7 |
| √ | √           | IPI00022391                                                       | Serum amyloid P-component precursor                                         | APCS    | 7 |
| √ | √           | IPI00333140                                                       | Delta and Notch-like epidermal growth factor-related receptor precursor     | DNER    | 7 |
| √ | √           | IPI00027466                                                       | Carbonic anhydrase 4 precursor                                              | CA4     | 7 |
| √ | √           | IPI00019038                                                       | Lysozyme C precursor                                                        | LYZ     | 7 |
| √ | √           | IPI00216298                                                       | Thioredoxin                                                                 | TXN     | 7 |
| √ | √           | IPI00029193                                                       | Hepatocyte growth factor activator precursor                                | HGFAC   | 7 |
| √ | √           | IPI00165972                                                       | Complement factor D preproprotein                                           | CFD     | 7 |
| √ | √           | IPI00745313                                                       | adipocyte enhancer binding protein 1 precursor                              | AEBP1   | 7 |
| √ | √           | IPI00001734                                                       | Isoform 1 of Phosphoserine aminotransferase                                 | PSAT1   | 7 |
| √ | √           | IPI00023648                                                       | Immunoglobulin superfamily containing leucine-rich repeat protein precursor | ISLR    | 7 |
| √ | √           | IPI00006128                                                       | Testican-2 precursor                                                        | SPOCK2  | 7 |
| √ | √           | IPI00299503                                                       | Isoform 1 of Phosphatidylinositol-glycan-specific phospholipase D precursor | GPLD1   | 7 |
| √ | √           | IPI00022792                                                       | Microfibril-associated glycoprotein 4 precursor                             | MFAP4   | 7 |
| √ | √           | IPI00328550                                                       | Thrombospondin-4 precursor                                                  | THBS4   | 7 |
| √ | √           | IPI00000138                                                       | Alpha-1,3-mannosyl-glycoprotein 2-beta-N-acetylglucosaminyltransferase      | MGAT1   | 7 |



|   |   |             |                                                                                    |          |   |
|---|---|-------------|------------------------------------------------------------------------------------|----------|---|
| √ | √ | IPI00004946 | chemokine (C-X-C motif) ligand 16                                                  | CXCL16   | 7 |
| √ | √ | IPI00171473 | Spondin-1 precursor                                                                | SPON1    | 7 |
| √ | √ | IPI00216882 | mannan-binding lectin serine protease 1 isoform 3                                  | MASP1    | 7 |
| √ | √ | IPI00019399 | Serum amyloid A-4 protein precursor                                                | SAA4     | 7 |
| √ | √ | IPI00304865 | transforming growth factor, beta receptor III                                      | TGFBR3   | 7 |
| √ | √ | IPI00005908 | ADAMTS-1 precursor                                                                 | ADAMTS1  | 7 |
| √ | √ | IPI00024825 | Isoform A of Proteoglycan-4 precursor                                              | PRG4     | 7 |
| √ | √ | IPI00168479 | Isoform 1 of Apolipoprotein A-I-binding protein precursor                          | APOA1BP  | 7 |
| √ | √ | IPI00398715 | Neuropilin 1                                                                       | NRP1     | 7 |
|   | √ | IPI00028448 | Brain-specific angiogenesis inhibitor 3 precursor                                  | BAI3     | 7 |
|   | √ | IPI00002236 | Lactadherin precursor                                                              | MFGE8    | 7 |
|   | √ | IPI00014964 | Lymphocyte antigen 6H precursor                                                    | LY6H     | 7 |
|   | √ | IPI00103471 | Thioredoxin-like selenoprotein M precursor                                         | SELM     | 7 |
|   | √ | IPI00029046 | Uncharacterized protein KIAA0152 precursor                                         | KIAA0152 | 7 |
|   | √ | IPI00791134 | Calsyntenin 2                                                                      | CLSTN2   | 7 |
|   | √ | IPI00428511 | Neurexin-1-beta precursor                                                          | NRXN1    | 7 |
|   | √ | IPI00412988 | Isoform 1 of Netrin-G1 precursor                                                   | NTNG1    | 7 |
|   | √ | IPI00168884 | Renin receptor precursor                                                           | ATP6AP2  | 7 |
| √ |   | IPI00465436 | Catalase                                                                           | CAT      | 7 |
| √ |   | IPI00246058 | PDCD6IP protein                                                                    | PDCD6IP  | 7 |
| √ |   | IPI00026270 | Carboxypeptidase M precursor                                                       | CPM      | 7 |
| √ |   | IPI00290328 | Receptor-type tyrosine-protein phosphatase eta precursor                           | PTPRJ    | 7 |
| √ |   | IPI00030075 | Fibroleukin precursor                                                              | FGL2     | 7 |
| √ |   | IPI00296099 | Thrombospondin-1 precursor                                                         | THBS1    | 7 |
| √ |   | IPI00003648 | Isoform Delta of Poliovirus receptor-related protein 1 precursor                   | PVRL1    | 7 |
| √ |   | IPI00029605 | N-acetylgalactosamine-6-sulfatase precursor                                        | GALNS    | 7 |
| √ |   | IPI00216983 | Carbonic anhydrase 3                                                               | CA3      | 7 |
| √ |   | IPI00025818 | Isoform 1 of Polypeptide N-acetylgalactosaminyltransferase 1                       | GALNT1   | 7 |
| √ |   | IPI00178767 | Acid sphingomyelinase-like phosphodiesterase 3a precursor                          | SMPDL3A  | 7 |
| √ |   | IPI00029273 | Isoform 1 of Hepatocyte growth factor receptor precursor                           | MET      | 7 |
|   |   | IPI00026103 | ACHE protein                                                                       | ACHE     | 7 |
|   |   | IPI00016679 | SLIT and NTRK-like protein 5 precursor                                             | SLITRK5  | 7 |
|   |   | IPI00168626 | Isoform 1 of Putative polypeptide N-acetylgalactosaminyltransferase-like protein 4 | GALNTL4  | 7 |
|   |   | IPI00746388 | Ezrin                                                                              | EZR      | 7 |
|   |   | IPI00830047 | Uncharacterized protein ENSP00000374858 (Fragment)                                 | -        | 7 |
|   |   | IPI00478483 | 172 kDa protein                                                                    | LAMC3    | 7 |
|   |   | IPI00171410 | Isoform 1 of Uncharacterized protein C3orf21                                       | C3orf21  | 7 |
|   |   | IPI00013569 | Isoform 1 of Pappalysin-2 precursor                                                | PAPPA2   | 7 |
|   |   | IPI00166892 | DPPY splice variant c                                                              | DPP10    | 7 |
|   |   | IPI00021903 | Isoform Alpha of ADAM 23 precursor                                                 | ADAM23   | 7 |

|   |             |                                                                   |                                                                            |         |   |
|---|-------------|-------------------------------------------------------------------|----------------------------------------------------------------------------|---------|---|
|   | IPI00017569 | Fas apoptotic inhibitory molecule 2                               | FAIM2                                                                      | 7       |   |
|   | IPI00167215 | Isoform 1 of Hepatocyte cell adhesion molecule precursor          | HEPACAM                                                                    | 7       |   |
|   | IPI00789234 | Immunoglobulin V-set domain containing protein                    | VSTM2A                                                                     | 7       |   |
|   | IPI00183321 | Isoform 1 of N-acetylgalactosamine 4-sulfate 6-O-sulfotransferase | GALNAC4S-6S                                                                | 7       |   |
|   | IPI00012283 | Isoform 1 of Semaphorin-3B precursor                              | SEMA3B                                                                     | 7       |   |
|   | √*          | IPI00301961                                                       | Neuroendocrine convertase 1 precursor                                      | PCSK1   | 6 |
| √ | √           | IPI00025846                                                       | Isoform 2A of Desmocollin-2 precursor                                      | DSC2    | 6 |
| √ | √           | IPI00011732                                                       | Isoform 1 of GDNF family receptor alpha-2 precursor                        | GFRA2   | 6 |
| √ | √           | IPI00329482                                                       | Isoform 1 of Laminin subunit alpha-4 precursor                             | LAMA4   | 6 |
| √ | √           | IPI00015049                                                       | Isoform 2 of Repulsive guidance molecule A precursor                       | RGMA    | 6 |
| √ | √           | IPI00004503                                                       | lysosomal-associated membrane protein 1                                    | LAMP1   | 6 |
| √ | √           | IPI00018206                                                       | Aspartate aminotransferase, mitochondrial precursor                        | GOT2    | 6 |
| √ | √           | IPI00015911                                                       | Dihydrolipoyl dehydrogenase, mitochondrial precursor                       | DLD     | 6 |
| √ | √           | IPI00011140                                                       | Protein NOV homolog precursor                                              | NOV     | 6 |
| √ | √           | IPI00789954                                                       | 7 kDa protein                                                              | TF      | 6 |
| √ | √           | IPI00011605                                                       | Cerebellin-1 precursor                                                     | CBLN1   | 6 |
| √ | √           | IPI00028553                                                       | Isoform 2 of Multiple inositol polyphosphate phosphatase 1 precursor       | MINPP1  | 6 |
| √ | √           | IPI00029061                                                       | Selenoprotein P precursor                                                  | SEPP1   | 6 |
| √ | √           | IPI00301143                                                       | Isoform 1 of Peptidase inhibitor 16 precursor                              | PI16    | 6 |
| √ | √           | IPI00060310                                                       | Phospholipase D4                                                           | PLD4    | 6 |
| √ | √           | IPI00295414                                                       | Collagen alpha-1(XV) chain precursor                                       | COL15A1 | 6 |
| √ | √           | IPI00006154                                                       | Isoform Long of Complement factor H-related protein 2 precursor            | CFHR2   | 6 |
| √ | √           | IPI00168866                                                       | MAM domain containing glycosylphosphatidylinositol anchor 1                | MDGA1   | 6 |
| √ | √           | IPI00017704                                                       | Coactosin-like protein                                                     | COTL1   | 6 |
| √ | √           | IPI00739827                                                       | Isoform LAMP-2B of Lysosome-associated membrane glycoprotein 2 precursor   | LAMP2   | 6 |
| √ | √           | IPI00301255                                                       | Immunoglobulin superfamily member 21 precursor                             | IGSF21  | 6 |
| √ | √           | IPI00002525                                                       | Neudesin precursor                                                         | NENF    | 6 |
| √ | √           | IPI00382500                                                       | Ig heavy chain V-III region GAL                                            | -       | 6 |
| √ | √           | IPI00479116                                                       | Carboxypeptidase N subunit 2 precursor                                     | CPN2    | 6 |
| √ | √           | IPI00009030                                                       | Isoform LAMP-2A of Lysosome-associated membrane glycoprotein 2 precursor   | LAMP2   | 6 |
| √ | √           | IPI00022892                                                       | Thy-1 membrane glycoprotein precursor                                      | THY1    | 6 |
| √ | √           | IPI00216602                                                       | Isoform 5 of Fibroblast growth factor receptor 2 precursor                 | FGFR2   | 6 |
| √ | √           | IPI00784258                                                       | latent transforming growth factor beta binding protein 1 isoform LTBP-1L   | LTBP1   | 6 |
| √ | √           | IPI00386630                                                       | TCN2 protein                                                               | TCN2    | 6 |
| √ | √           | IPI00745251                                                       | Mannosyl-oligosaccharide 1,2-alpha-mannosidase IC                          | MAN1C1  | 6 |
| √ | √           | IPI00008207                                                       | Endoplasmic reticulum mannosyl-oligosaccharide 1,2-alpha-mannosidase       | MAN1B1  | 6 |
| √ | √           | IPI00024601                                                       | Carbonic anhydrase-related protein 10                                      | CA10    | 6 |
| √ | √           | IPI00024034                                                       | Cadherin-4 precursor                                                       | CDH4    | 6 |
| √ | √           | IPI00011994                                                       | Ectonucleotide pyrophosphatase/phosphodiesterase family member 5 precursor | ENPP5   | 6 |
| √ | √           | IPI00002925                                                       | Cocaine- and amphetamine-regulated transcript protein precursor            | CARTPT  | 6 |

|   |             |                                                                                    |             |   |
|---|-------------|------------------------------------------------------------------------------------|-------------|---|
| √ | IPI00176424 | Neuroigin-2 precursor                                                              | NLGN2       | 6 |
| √ | IPI00337351 | MAM domain-containing glycosylphosphatidylinositol anchor protein 2 precursor      | MDGA2       | 6 |
| √ | IPI00003907 | Isoform 1 of Protocadherin gamma C5 precursor                                      | PCDHGC5;PCF | 6 |
| √ | IPI00060715 | BTB/POZ domain-containing protein KCTD12                                           | KCTD12      | 6 |
| √ | IPI00402157 | Cerebellin-3 precursor                                                             | CBLN3       | 6 |
| √ | IPI00002142 | Protocadherin-10 precursor                                                         | PCDH10      | 6 |
| √ | IPI00299086 | Syntenin-1                                                                         | SDCBP       | 6 |
| √ | IPI00029275 | Isoform 1 of Melanotransferrin precursor                                           | MF12        | 6 |
| √ | IPI00374065 | similar to melanoma inhibitory activity 3 isoform 1                                | MIA3        | 6 |
| √ | IPI00306322 | Collagen alpha-2(IV) chain precursor                                               | COL4A2      | 6 |
| √ | IPI00030887 | Tyrosine-protein kinase receptor TYRO3 precursor                                   | TYRO3       | 6 |
| √ | IPI00719621 | Isoform 1 of Plexin-A2 precursor                                                   | PLXNA2      | 6 |
| √ | IPI00387168 | Isoform 1 of Proprotein convertase subtilisin/kexin type 9 precursor               | PCSK9       | 6 |
| √ | IPI00004413 | Tumor necrosis factor receptor superfamily member 21 precursor                     | TNFRSF21    | 6 |
| √ | IPI00027078 | Carboxypeptidase D precursor                                                       | CPD         | 6 |
| √ | IPI00006971 | Isoform 1 of Endosialin precursor                                                  | CD248       | 6 |
| √ | IPI00328257 | Isoform A of AP-1 complex subunit beta-1                                           | AP1B1       | 6 |
| √ | IPI00019502 | Myosin-9                                                                           | MYH9        | 6 |
| √ | IPI00025204 | CD5 antigen-like precursor                                                         | CD5L        | 6 |
| √ | IPI00027462 | Protein S100-A9                                                                    | S100A9      | 6 |
| √ | IPI00477611 | 184 kDa protein                                                                    | COL5A1      | 6 |
| √ | IPI00216319 | 14-3-3 protein eta                                                                 | YWHAH       | 6 |
| √ | IPI00013897 | ADAM 10 precursor                                                                  | ADAM10      | 6 |
| √ | IPI00304840 | Isoform 2C2 of Collagen alpha-2(VI) chain precursor                                | COL6A2      | 6 |
| √ | IPI00007750 | Tubulin alpha-4A chain                                                             | TUBA4A      | 6 |
| √ | IPI00018534 | Histone H2B type 1-L                                                               | HIST1H2BL   | 6 |
|   | IPI00016645 | Isoform 1 of Ephrin type-A receptor 7 precursor                                    | EPHA7       | 6 |
|   | IPI00102435 | collagen, type XXI, alpha 1 precursor                                              | COL21A1     | 6 |
|   | IPI00182438 | Isoform 2 of Contactin-5 precursor                                                 | CNTN5       | 6 |
|   | IPI00791479 | CDNA FLJ90299 fis, clone NT2RP2000514, highly similar to Homo sapiens roundabout 2 | ROBO2       | 6 |
|   | IPI00299652 | Isoform Long of ADAM 11 precursor                                                  | ADAM11      | 6 |
|   | IPI00854709 | Uncharacterized protein ENSP00000374799 (Fragment)                                 | -           | 6 |
|   | IPI00165975 | Cysteine-rich flanking region, C-terminal domain containing protein                | ISLR2       | 6 |
|   | IPI00789847 | Protein                                                                            | -           | 6 |
|   | IPI00642861 | CDNA FLJ37558 fis, clone BRCOC1000087                                              | CXorf36     | 6 |
|   | IPI00155729 | Plexin-B3 precursor                                                                | PLXNB3      | 6 |
|   | IPI00409640 | Isoform 1 of Lipolysis-stimulated lipoprotein receptor                             | LSR         | 6 |
|   | IPI00291807 | C3 and PZP-like, alpha-2-macroglobulin domain containing 8                         | CPAMD8      | 6 |
|   | IPI00829590 | Uncharacterized protein ENSP00000375044                                            | -           | 6 |
|   | IPI00295399 | Cadherin-10 precursor                                                              | CDH10       | 6 |

|   |             |                                   |                                                                                    |              |   |
|---|-------------|-----------------------------------|------------------------------------------------------------------------------------|--------------|---|
|   | IPI00453473 | Histone H4                        | HIST2H4A;HIS                                                                       | 6            |   |
|   | IPI00303894 | Protein FAM3A precursor           | FAM3A                                                                              | 6            |   |
|   | IPI00555693 | Isoform 3 of Testican-3 precursor | SPOCK3                                                                             | 6            |   |
| √ | √*          | IPI00006166                       | Probable G-protein coupled receptor 37 precursor                                   | GPR37        | 5 |
| √ | √*          | IPI00220827                       | Thymosin beta-10                                                                   | TMSB10       | 5 |
|   | √*          | IPI00012075                       | C-type natriuretic peptide precursor                                               | NPPC         | 5 |
| √ | √           | IPI00292300                       | contactin associated protein-like 5                                                | CNTNAP5      | 5 |
| √ | √           | IPI00419966                       | Isoform 2 of Target of Nesh-SH3 precursor                                          | ABI3BP       | 5 |
| √ | √           | IPI00186903                       | Isoform 2 of Apolipoprotein-L1 precursor                                           | APOL1        | 5 |
| √ | √           | IPI00430291                       | Isoform Delta 2 of Calcium/calmodulin-dependent protein kinase type II delta chain | CAMK2D       | 5 |
| √ | √           | IPI00019954                       | Cystatin-M precursor                                                               | CST6         | 5 |
| √ | √           | IPI00328113                       | Fibrillin-1 precursor                                                              | FBN1         | 5 |
| √ | √           | IPI00015351                       | Isoform 1 of UPF0424 protein C1orf128                                              | C1orf128     | 5 |
| √ | √           | IPI00032288                       | MANSC domain-containing protein 1 precursor                                        | MANSC1       | 5 |
| √ | √           | IPI00021856                       | Apolipoprotein C-II precursor                                                      | APOC2        | 5 |
| √ | √           | IPI00056357                       | Uncharacterized protein C19orf10 precursor                                         | C19orf10     | 5 |
| √ | √           | IPI00329801                       | Annexin A5                                                                         | ANXA5        | 5 |
| √ | √           | IPI00020987                       | Prolargin precursor                                                                | PRELP        | 5 |
| √ | √           | IPI00018274                       | Isoform 1 of Epidermal growth factor receptor precursor                            | EGFR         | 5 |
| √ | √           | IPI00294615                       | Fibulin-5 precursor                                                                | FBLN5        | 5 |
| √ | √           | IPI00029236                       | Insulin-like growth factor-binding protein 5 precursor                             | IGFBP5       | 5 |
| √ | √           | IPI00003176                       | Serine protease HTRA1 precursor                                                    | HTRA1        | 5 |
| √ | √           | IPI00295386                       | Carbonyl reductase [NADPH] 1                                                       | CBR1         | 5 |
| √ | √           | IPI00219131                       | Isoform 1 of ICOS ligand precursor                                                 | ICOSLG       | 5 |
| √ | √           | IPI00291006                       | Malate dehydrogenase, mitochondrial precursor                                      | MDH2         | 5 |
| √ | √           | IPI00289058                       | Ly-6/neurotoxin-like protein 1 precursor                                           | LYNX1        | 5 |
| √ | √           | IPI00032311                       | Lipopolysaccharide-binding protein precursor                                       | LBP          | 5 |
| √ | √           | IPI00023824                       | Fibulin-2 precursor                                                                | FBLN2        | 5 |
| √ | √           | IPI00007797                       | Fatty acid-binding protein, epidermal                                              | FABP5;FABP5L | 5 |
| √ | √           | IPI00375364                       | Isoform 3 of Chitotriosidase-1 precursor                                           | CHIT1        | 5 |
| √ | √           | IPI00289870                       | Isoform C of Protocadherin-7 precursor                                             | PCDH7        | 5 |
| √ | √           | IPI00005126                       | Ephrin-B2 precursor                                                                | EFNB2        | 5 |
| √ | √           | IPI00031564                       | Uncharacterized protein C7orf24                                                    | C7orf24      | 5 |
| √ | √           | IPI00034319                       | Isoform A of Protein CutA precursor                                                | CUTA         | 5 |
| √ | √           | IPI00021857                       | Apolipoprotein C-III precursor                                                     | APOC3        | 5 |
| √ | √           | IPI00003102                       | Ciliary neurotrophic factor receptor alpha precursor                               | CNTFR        | 5 |
| √ | √           | IPI00550363                       | Transgelin-2                                                                       | TAGLN2       | 5 |
|   | √           | IPI00259102                       | Mammalian ependymin-related protein 1 precursor                                    | EPDR1        | 5 |
|   | √           | IPI00017257                       | Cathepsin O precursor                                                              | CTSO         | 5 |
|   | √           | IPI00019533                       | Chitinase-3-like protein 2 precursor                                               | CHI3L2       | 5 |

|   |             |                                                                         |           |   |
|---|-------------|-------------------------------------------------------------------------|-----------|---|
| √ | IPI00879309 | Protein                                                                 | NRXN2     | 5 |
| √ | IPI00419595 | Isoform 1 of Podocalyxin-like protein 2 precursor                       | PODXL2    | 5 |
| √ | IPI00216138 | Transgelin                                                              | TAGLN     | 5 |
| √ | IPI00024048 | Cadherin-15 precursor                                                   | CDH15     | 5 |
| √ | IPI00642632 | C7 protein                                                              | -         | 5 |
| √ | IPI00289924 | Alpha-2,8-sialyltransferase 8E                                          | ST8SIA5   | 5 |
| √ | IPI00328243 | Phospholipase D3                                                        | PLD3      | 5 |
| √ | IPI00031821 | Integral membrane protein 2B                                            | ITM2B     | 5 |
| √ | IPI00023751 | Growth/differentiation factor 8 precursor                               | MSTN      | 5 |
| √ | IPI00043215 | immunoglobulin superfamily, member 1 isoform 1                          | IGSF1     | 5 |
| √ | IPI00412987 | GMFB protein                                                            | GMFB      | 5 |
| √ | IPI00302840 | Sodium/potassium-transporting ATPase subunit alpha-3                    | ATP1A3    | 5 |
| √ | IPI00022333 | Brain-specific angiogenesis inhibitor 1 precursor                       | BAI1      | 5 |
| √ | IPI00385007 | Putative uncharacterized protein DKFZp686A01208                         | AP1B1     | 5 |
| √ | IPI00023807 | Semaphorin-4D precursor                                                 | SEMA4D    | 5 |
| √ | IPI00008215 | NADP-dependent malic enzyme                                             | ME1       | 5 |
| √ | IPI00007240 | Coagulation factor XIII B chain precursor                               | F13B      | 5 |
| √ | IPI00292218 | Hepatocyte growth factor-like protein precursor                         | MST1      | 5 |
| √ | IPI00007199 | Protein Z-dependent protease inhibitor precursor                        | SERPINA10 | 5 |
| √ | IPI00019190 | Myocilin precursor                                                      | MYOC      | 5 |
| √ | IPI00018305 | Insulin-like growth factor-binding protein 3 precursor                  | IGFBP3    | 5 |
| √ | IPI00029606 | Isoform B of ADAM 17 precursor                                          | ADAM17    | 5 |
| √ | IPI00384391 | Myosin-reactive immunoglobulin heavy chain variable region (Fragment)   | -         | 5 |
| √ | IPI00026050 | Ceroid-lipofuscinosis neuronal protein 5                                | CLN5      | 5 |
| √ | IPI00031510 | Semaphorin-3A precursor                                                 | SEMA3A    | 5 |
| √ | IPI00016862 | Isoform Mitochondrial of Glutathione reductase, mitochondrial precursor | GSR       | 5 |
| √ | IPI00021794 | Lysosomal protective protein precursor                                  | CTSA      | 5 |
| √ | IPI00021447 | Alpha-amylase 2B precursor                                              | AMY2B     | 5 |
| √ | IPI00008780 | Stanniocalcin-2 precursor                                               | STC2      | 5 |
| √ | IPI00296197 | Nucleotide exchange factor SIL1 precursor                               | SIL1      | 5 |
| √ | IPI00009276 | Endothelial protein C receptor precursor                                | PROCR     | 5 |
| √ | IPI00009145 | Mannosyl-oligosaccharide 1,2-alpha-mannosidase IB                       | MAN1A2    | 5 |
| √ | IPI00005474 | Phospholysine phosphohistidine inorganic pyrophosphate phosphatase      | LHPP      | 5 |
| √ | IPI00030205 | Ig kappa chain V-III region HAH precursor                               | IGKV3-20  | 5 |
| √ | IPI00027377 | aggrecan isoform 2 precursor                                            | ACAN      | 5 |
| √ | IPI00029997 | 6-phosphogluconolactonase                                               | PGLS      | 5 |
| √ | IPI00329685 | Putative uncharacterized protein DKFZp686G12235                         | ARSA      | 5 |
| √ | IPI00218570 | Phosphoglycerate mutase 2                                               | PGAM2     | 5 |
| √ | IPI00306710 | Isoform 1 of Chordin precursor                                          | CHRD      | 5 |
| √ | IPI00431738 | X-linked interleukin-1 receptor accessory protein-like 1 precursor      | IL1RAPL1  | 5 |

|             |                                                                                  |           |   |
|-------------|----------------------------------------------------------------------------------|-----------|---|
| IPI00307592 | ATP-binding cassette, sub-family A, member 2 isoform a                           | ABCA2     | 5 |
| IPI00410122 | Isoform 1 of Plexin domain-containing protein 1 precursor                        | PLXDC1    | 5 |
| IPI00550115 | Isoform 1 of Acid sphingomyelinase-like phosphodiesterase 3b precursor           | SMPDL3B   | 5 |
| IPI00020672 | Isoform 1 of Dipeptidyl-peptidase 3                                              | DPP3;BBS1 | 5 |
| IPI00027174 | Isoform 1 of Fibroblast growth factor receptor 3 precursor                       | FGFR3     | 5 |
| IPI00829701 | Uncharacterized protein ENSP00000375014                                          | -         | 5 |
| IPI00006803 | Carbohydrate sulfotransferase 10                                                 | CHST10    | 5 |
| IPI00107886 | Semaphorin 6B isoform 2                                                          | SEMA6B    | 5 |
| IPI00171928 | Angiopoietin-related protein 7 precursor                                         | ANGPTL7   | 5 |
| IPI00304331 | Galactosylgalactosylxylosylprotein 3-beta-glucuronosyltransferase 3              | B3GAT3    | 5 |
| IPI00607655 | Isoform 2 of Ephrin type-A receptor 7 precursor                                  | EPHA7     | 5 |
| IPI00816799 | Rheumatoid factor D5 light chain (Fragment)                                      | -         | 5 |
| IPI00328745 | Reticulon-4 receptor-like 1 precursor                                            | RTN4RL1   | 5 |
| IPI00011730 | EMILIN-3 precursor                                                               | EMILIN3   | 5 |
| IPI00783689 | Immunglobulin heavy chain variable region (Fragment)                             | -         | 5 |
| IPI00026237 | Myelin-associated glycoprotein precursor                                         | MAG       | 5 |
| IPI00386133 | Ig kappa chain V-IV region B17 precursor                                         | -         | 5 |
| IPI00296558 | Carboxypeptidase-like protein X2 precursor                                       | CPXM2     | 5 |
| IPI00413912 | Transmembrane protein 132E precursor                                             | TMEM132E  | 5 |
| IPI00063048 | Isoform 2 of Beta-galactoside alpha-2,6-sialyltransferase 2                      | ST6GAL2   | 5 |
| IPI00003021 | Sodium/potassium-transporting ATPase subunit alpha-2 precursor                   | ATP1A2    | 5 |
| IPI00027721 | Isoform 1 of Alpha-type platelet-derived growth factor receptor precursor        | PDGFRA    | 5 |
| IPI00783287 | Immunglobulin heavy chain variable region (Fragment)                             | -         | 5 |
| IPI00013096 | Isoform 1 of Receptor-type tyrosine-protein phosphatase T precursor              | PTPRT     | 5 |
| IPI00787265 | similar to aminopeptidase puromycin sensitive                                    | LOC729034 | 5 |
| IPI00020906 | Inositol monophosphatase                                                         | IMPA1     | 5 |
| IPI00740545 | similar to Prostate, ovary, testis expressed protein on chromosome 2 isoform 2   | LOC653269 | 5 |
| IPI00010348 | Deoxyribonuclease-2-alpha precursor                                              | DNASE2    | 5 |
| IPI00294834 | Aspartyl/asparaginyl beta-hydroxylase                                            | ASPH      | 5 |
| IPI00829947 | 13 kDa protein                                                                   | -         | 5 |
| IPI00165044 | Isoform 2 of Uncharacterized protein C4orf18                                     | C4orf18   | 5 |
| IPI00021275 | Isoform 1 of Ephrin type-B receptor 2 precursor                                  | EPHB2     | 5 |
| IPI00478892 | Leucine-rich repeats and immunoglobulin-like domains protein 2 precursor         | LRIG2     | 5 |
| IPI00556287 | Putative uncharacterized protein                                                 | -         | 5 |
| IPI00854841 | Uncharacterized protein ENSP00000375033                                          | -         | 5 |
| IPI00736885 | Ig kappa chain V-II region TEW                                                   | LOC440786 | 5 |
| IPI00016467 | SLIT and NTRK-like protein 3 precursor                                           | SLITRK3   | 5 |
| IPI00827892 | VH87-2 protein (Fragment)                                                        | -         | 5 |
| IPI00479997 | Stathmin                                                                         | STMN1     | 5 |
| IPI00790775 | Isoform 3 of Voltage-dependent calcium channel subunit alpha-2/delta-3 precursor | CACNA2D3  | 5 |

|   |             |                                                                                |                                                                                |           |   |
|---|-------------|--------------------------------------------------------------------------------|--------------------------------------------------------------------------------|-----------|---|
|   | IPI00736860 | ELK2, member of ETS oncogene family, pseudogene 1                              | ELK2P1                                                                         | 5         |   |
|   | IPI00017968 | ADM precursor                                                                  | ADM                                                                            | 5         |   |
|   | IPI00867665 | Similar to Protein disulfide-isomerase precursor                               | -                                                                              | 5         |   |
|   | IPI00181174 | Isoform 1 of Neuroligin-4, X-linked precursor                                  | NLGN4X                                                                         | 5         |   |
|   | IPI00414467 | collectin sub-family member 12                                                 | COLEC12                                                                        | 5         |   |
|   | IPI00010790 | Biglycan precursor                                                             | BGN                                                                            | 5         |   |
|   | IPI00021983 | Isoform 1 of Nicastrin precursor                                               | NCSTN                                                                          | 5         |   |
|   | IPI00044743 | Isoform 1 of Transmembrane protein 132B                                        | TMEM132B                                                                       | 5         |   |
|   | IPI00005981 | Transgelin-3                                                                   | TAGLN3                                                                         | 5         |   |
|   | IPI00006482 | Isoform Long of Sodium/potassium-transporting ATPase subunit alpha-1 precursor | ATP1A1                                                                         | 5         |   |
|   | √*          | IPI00026174                                                                    | Cholecystokinins precursor                                                     | CCK       | 4 |
| √ | √           | IPI00744692                                                                    | Transaldolase                                                                  | TALDO1    | 4 |
| √ | √           | IPI00794450                                                                    | 9 kDa protein                                                                  | LYNX1     | 4 |
| √ | √           | IPI00401283                                                                    | Multiple epidermal growth factor-like domains 9 precursor                      | MEGF9     | 4 |
| √ | √           | IPI00014439                                                                    | Dihydropteridine reductase                                                     | QDPR      | 4 |
| √ | √           | IPI00025840                                                                    | Isoform 1 of Ephrin-A1 precursor                                               | EFNA1     | 4 |
| √ | √           | IPI00296058                                                                    | EGF-containing fibulin-like extracellular matrix protein 2 precursor           | EFEMP2    | 4 |
| √ | √           | IPI00011302                                                                    | CD59 glycoprotein precursor                                                    | CD59      | 4 |
| √ | √           | IPI00021855                                                                    | Apolipoprotein C-I precursor                                                   | APOC1     | 4 |
| √ | √           | IPI00178926                                                                    | immunoglobulin J chain                                                         | IGJ       | 4 |
| √ | √           | IPI00015525                                                                    | Multimerin-2 precursor                                                         | MMRN2     | 4 |
| √ | √           | IPI00296992                                                                    | AXL receptor tyrosine kinase isoform 1                                         | AXL       | 4 |
| √ | √           | IPI00302944                                                                    | Isoform 4 of Collagen alpha-1(XII) chain precursor                             | COL12A1   | 4 |
| √ | √           | IPI00784430                                                                    | Similar to Ig kappa chain V-III region VG precursor                            | IGKV3D-11 | 4 |
| √ | √           | IPI00305380                                                                    | Insulin-like growth factor-binding protein 4 precursor                         | IGFBP4    | 4 |
| √ | √           | IPI00029699                                                                    | Ribonuclease 4 precursor                                                       | RNASE4    | 4 |
| √ | √           | IPI00001893                                                                    | Isoform A of Protocadherin-7 precursor                                         | PCDH7     | 4 |
| √ | √           | IPI00012386                                                                    | Cochlin precursor                                                              | COCH      | 4 |
| √ | √           | IPI00413451                                                                    | Putative uncharacterized protein DKFZp686I04222                                | SERPINB6  | 4 |
| √ | √           | IPI00007102                                                                    | Uncharacterized protein C17orf25                                               | GLOD4     | 4 |
| √ | √           | IPI00643348                                                                    | 80 kDa protein                                                                 | COMP      | 4 |
| √ | √           | IPI00741710                                                                    | Isoform 2 of Sushi, nidogen and EGF-like domain-containing protein 1 precursor | SNED1     | 4 |
| √ | √           | IPI00168520                                                                    | Isoform 2 of Matrilin-2 precursor                                              | MATN2     | 4 |
| √ | √           | IPI00153049                                                                    | Isoform 2 of Matrix-remodeling-associated protein 8 precursor                  | MXRA8     | 4 |
| √ | √           | IPI00432525                                                                    | Sialic acid-binding Ig-like lectin 14 precursor                                | SIGLEC14  | 4 |
| √ | √           | IPI00152850                                                                    | junctional adhesion molecule 3 precursor                                       | JAM3      | 4 |
| √ | √           | IPI00217882                                                                    | Sortilin precursor                                                             | SORT1     | 4 |
| √ | √           | IPI00297188                                                                    | Brain-specific angiogenesis inhibitor 2 precursor                              | BAI2      | 4 |
| √ | √           | IPI00099670                                                                    | carboxyl ester lipase precursor                                                | CEL       | 4 |
| √ | √           | IPI00219930                                                                    | Cellular retinoic acid-binding protein 1                                       | CRABP1    | 4 |

|   |             |                                                                               |              |   |
|---|-------------|-------------------------------------------------------------------------------|--------------|---|
| √ | IPI00387115 | Ig kappa chain V-III region SIE                                               | -            | 4 |
| √ | IPI00024129 | Peptidyl-prolyl cis-trans isomerase C                                         | PPIC         | 4 |
| √ | IPI00299699 | Neural proliferation differentiation and control protein 1 precursor          | NPDC1        | 4 |
| √ | IPI00166339 | Isoform 1 of Ephrin type-A receptor 10 precursor                              | EPHA10       | 4 |
| √ | IPI00000824 | Isoform A of NT-3 growth factor receptor precursor                            | NTRK3        | 4 |
| √ | IPI00075248 | Calmodulin                                                                    | CALM3;CALM2  | 4 |
| √ | IPI00880120 | Abhydrolase domain-containing protein 14A                                     | ABHD14A      | 4 |
| √ | IPI00442911 | CDNA FLJ26266 fis, clone DMC05613                                             | IGHV4-31     | 4 |
| √ | IPI00008494 | Intercellular adhesion molecule 1 precursor                                   | ICAM1        | 4 |
| √ | IPI00023858 | Fc-gamma receptor IIIb                                                        | FCGR3B       | 4 |
| √ | IPI00027223 | Isocitrate dehydrogenase [NADP] cytoplasmic                                   | IDH1         | 4 |
| √ | IPI00410585 | Isoform 1 of Crumbs homolog 2 precursor                                       | CRB2         | 4 |
| √ | IPI00299724 | Isoform 1 of Signal regulatory protein beta-1 precursor                       | SIRPB1       | 4 |
| √ | IPI00167710 | Isoform 1 of Fibulin-7 precursor                                              | FBLN7        | 4 |
| √ | IPI00218414 | Carbonic anhydrase 2                                                          | CA2          | 4 |
| √ | IPI00465255 | Isoform 1 of Proline-rich acidic protein 1 precursor                          | PRAP1        | 4 |
| √ | IPI00182944 | Isoform 3 of Calcium/calmodulin-dependent protein kinase type II beta chain   | CAMK2B       | 4 |
| √ | IPI00103871 | Isoform 1 of Roundabout homolog 4 precursor                                   | ROBO4        | 4 |
| √ | IPI00293128 | Exostosin-1                                                                   | EXT1         | 4 |
| √ | IPI00217236 | Tubulin-specific chaperone A                                                  | TBCA         | 4 |
| √ | IPI00383732 | VH3 protein (Fragment)                                                        | -            | 4 |
| √ | IPI00414717 | golgi apparatus protein 1                                                     | GLG1         | 4 |
| √ | IPI00219684 | Fatty acid-binding protein, heart                                             | FABP3        | 4 |
| √ | IPI00027341 | Macrophage-capping protein                                                    | CAPG         | 4 |
| √ | IPI00008223 | UV excision repair protein RAD23 homolog B                                    | RAD23B       | 4 |
| √ | IPI00414909 | Alpha-N-acetylgalactosaminidase precursor                                     | NAGA         | 4 |
| √ | IPI00021817 | Vitamin K-dependent protein C precursor                                       | PROC         | 4 |
| √ | IPI00437751 | Isoform Somatic-1 of Angiotensin-converting enzyme, somatic isoform precursor | ACE          | 4 |
| √ | IPI00017567 | Isoform Long of Endoglin precursor                                            | ENG          | 4 |
| √ | IPI00219025 | Glutaredoxin-1                                                                | GLRX         | 4 |
| √ | IPI00010706 | Glutathione synthetase                                                        | GSS          | 4 |
| √ | IPI00257508 | Dihydropyrimidinase-related protein 2                                         | DPYSL2       | 4 |
| √ | IPI00293925 | Isoform 1 of Ficolin-3 precursor                                              | FCN3         | 4 |
| √ | IPI00031789 | Isoform 1 of Interleukin-1 receptor accessory protein precursor               | IL1RAP       | 4 |
| √ | IPI00218474 | Beta-enolase                                                                  | ENO3         | 4 |
| √ | IPI00101608 | Isoform 2 of Cysteine-rich with EGF-like domain protein 1 precursor           | CRELD1       | 4 |
| √ | IPI00216457 | Histone H2A type 2-A                                                          | HIST2H2AA3;H | 4 |
| √ | IPI00747849 | Isoform 1 of Sodium/potassium-transporting ATPase subunit beta-1              | ATP1B1       | 4 |
| √ | IPI00549330 | Myosin-reactive immunoglobulin light chain variable region                    | IGKV3D-15    | 4 |
| √ | IPI00007425 | desmocollin 1 isoform Dsc1b preproprotein                                     | DSC1         | 4 |



|   |             |                                                                               |             |   |
|---|-------------|-------------------------------------------------------------------------------|-------------|---|
| √ | IPI00020984 | Calnexin precursor                                                            | CANX        | 4 |
| √ | IPI00554786 | Thioredoxin reductase 1, cytoplasmic precursor                                | TXNRD1      | 4 |
| √ | IPI00019359 | Keratin, type I cytoskeletal 9                                                | KRT9        | 4 |
| √ | IPI00384404 | Rheumatoid factor RF-ET9 (Fragment)                                           | -           | 4 |
| √ | IPI00218834 | Low affinity immunoglobulin gamma Fc region receptor III-A precursor          | FCGR3A      | 4 |
| √ | IPI00017841 | Isoform 1 of Noelin precursor                                                 | OLFM1       | 4 |
| √ | IPI00784154 | 60 kDa heat shock protein, mitochondrial precursor                            | HSPD1       | 4 |
| √ | IPI00006451 | Vesicle-fusing ATPase                                                         | NSF         | 4 |
| √ | IPI00025476 | Pancreatic alpha-amylase precursor                                            | AMY2A;AMY1E | 4 |
|   | IPI00827940 | Mu-chain precursor (Fragment)                                                 | -           | 4 |
|   | IPI00829752 | Uncharacterized protein ENSP00000375029                                       | -           | 4 |
|   | IPI00749328 | hypothetical protein                                                          | LOC729085   | 4 |
|   | IPI00871227 | Isoform 1 of Hemicentin-1 precursor                                           | HMCN1       | 4 |
|   | IPI00180707 | Isoform 1 of FRAS1-related extracellular matrix protein 2 precursor           | FREM2       | 4 |
|   | IPI00005652 | Isoform 1 of WSC domain-containing protein 2                                  | WSCD2       | 4 |
|   | IPI00009111 | Trophoblast glycoprotein precursor                                            | TPBG        | 4 |
|   | IPI00219301 | Myristoylated alanine-rich C-kinase substrate                                 | MARCKS      | 4 |
|   | IPI00007709 | Isoform 1 of ADAM 28 precursor                                                | ADAM28      | 4 |
|   | IPI00019209 | Semaphorin-3C precursor                                                       | SEMA3C      | 4 |
|   | IPI00001506 | Neuropeptide Y precursor                                                      | NPY         | 4 |
|   | IPI00854667 | Uncharacterized protein ENSP00000375015                                       | -           | 4 |
|   | IPI00827560 | HRV Fab N27-VL (Fragment)                                                     | -           | 4 |
|   | IPI00007249 | ectonucleotide pyrophosphatase/phosphodiesterase 4                            | ENPP4       | 4 |
|   | IPI00031534 | Alpha-N-acetylgalactosaminide alpha-2,6-sialyltransferase 1                   | ST6GALNAC1  | 4 |
|   | IPI00217466 | Histone H1.3                                                                  | HIST1H1D    | 4 |
|   | IPI00643115 | Stathmin 1/oncoprotein 18                                                     | STMN1       | 4 |
|   | IPI00217759 | Isoform 1 of Alpha-(1,3)-fucosyltransferase 11                                | FUT11       | 4 |
|   | IPI00218345 | Isoform 2 of Tubulin alpha-3C/D chain                                         | TUBA3C;TUBA | 4 |
|   | IPI00478890 | Isoform 1 of Testican-3 precursor                                             | SPOCK3      | 4 |
|   | IPI00011518 | Isoform A of Beta-secretase 1 precursor                                       | BACE1       | 4 |
|   | IPI00783184 | Immunoglobulin heavy chain variable region (Fragment)                         | -           | 4 |
|   | IPI00251507 | Isoform IB of Synapsin-1                                                      | SYN1        | 4 |
|   | IPI00019501 | Ephrin-B3 precursor                                                           | EFNB3       | 4 |
|   | IPI00432723 | Isoform 1 of Xylosyltransferase 2                                             | XYLT2       | 4 |
|   | IPI00644472 | Isoform 2 of Haloacid dehalogenase-like hydrolase domain-containing protein 2 | HDHD2       | 4 |
|   | IPI00217465 | Histone H1.2                                                                  | HIST1H1C    | 4 |
|   | IPI00012058 | Brain-derived neurotrophic factor precursor                                   | BDNF        | 4 |
|   | IPI00217467 | Histone H1.4                                                                  | HIST1H1E    | 4 |
|   | IPI00847670 | Similar to Phosphoglycerate mutase 1                                          | LOC440043   | 4 |
|   | IPI00021833 | Isoform Long of Platelet-derived growth factor A chain precursor              | PDGFA       | 4 |

|   |             |                                                                                             |                                                      |         |   |
|---|-------------|---------------------------------------------------------------------------------------------|------------------------------------------------------|---------|---|
|   | IPI00218539 | Isoform B of Collagen alpha-1(XI) chain precursor                                           | COL11A1                                              | 4       |   |
|   | IPI00300838 | Carbohydrate sulfotransferase 8                                                             | CHST8                                                | 4       |   |
|   | IPI00006657 | Protein FAM20B precursor                                                                    | FAM20B                                               | 4       |   |
|   | IPI00033560 | Isoform Alpha of Receptor-type tyrosine-protein phosphatase R precursor                     | PTPRR                                                | 4       |   |
|   | IPI00025809 | Alpha-1,6-mannosyl-glycoprotein 2-beta-N-acetylglucosaminyltransferase                      | MGAT2                                                | 4       |   |
|   | IPI00026197 | Similar to Ig kappa chain V-IV region precursor                                             | IGKV4-1                                              | 4       |   |
|   | IPI00023576 | Leucine-rich repeat transmembrane neuronal protein 2 precursor                              | LRRTM2                                               | 4       |   |
|   | IPI00215767 | Isoform Long of Beta-1,4-galactosyltransferase 1                                            | B4GALT1                                              | 4       |   |
|   | IPI00024094 | Rhesus blood group-associated glycoprotein                                                  | RHAG                                                 | 4       |   |
|   | IPI00827510 | HRV Fab 026-VL (Fragment)                                                                   | -                                                    | 4       |   |
|   | IPI00829663 | Uncharacterized protein ENSP00000374801                                                     | -                                                    | 4       |   |
|   | IPI00883855 | Similar to Hepatitis B virus receptor binding protein                                       | -                                                    | 4       |   |
|   | IPI00456589 | Isoform 1 of Polypeptide N-acetylgalactosaminyltransferase 11                               | GALNT11                                              | 4       |   |
|   | IPI00024036 | Cadherin-8 precursor                                                                        | CDH8                                                 | 4       |   |
|   | IPI00419720 | Dermokine gamma-1                                                                           | -                                                    | 4       |   |
|   | IPI00387118 | Ig kappa chain V-III region WOL                                                             | -                                                    | 4       |   |
|   | IPI00291395 | fibronectin leucine rich transmembrane protein 1                                            | FLRT1                                                | 4       |   |
|   | IPI00022367 | Isoform 2 of Astrotactin-1 precursor                                                        | ASTN1                                                | 4       |   |
|   | IPI00002307 | Isoform 1 of Neuroligin-3 precursor                                                         | NLGN3                                                | 4       |   |
|   | IPI00001399 | Adherens junction-associated protein 1                                                      | AJAP1                                                | 4       |   |
|   | IPI00006713 | Isoform 1 of DnaJ homolog subfamily C member 3                                              | DNAJC3                                               | 4       |   |
|   | IPI00827482 | Uncharacterized protein ENSP00000348964 (Fragment)                                          | -                                                    | 4       |   |
|   | IPI00008107 | Leucine-rich repeat and fibronectin type-III domain-containing protein 2 precursor          | LRFN2                                                | 4       |   |
|   | IPI00783024 | Myosin-reactive immunoglobulin heavy chain variable region (Fragment)                       | -                                                    | 4       |   |
|   | IPI00162329 | Isoform 1 of Transmembrane protein 25 precursor                                             | TMEM25                                               | 4       |   |
|   | IPI00217345 | Isoform 2 of UDP-GlcNAc:betaGal beta-1,3-N-acetylglucosaminyltransferase 2                  | B3GNT2                                               | 4       |   |
|   | IPI00023643 | Sema domain, transmembrane domain (TM), and cytoplasmic domain, (Semaphorin) 6C             | SEMA6C                                               | 4       |   |
|   | IPI00470484 | Isoform 1 of EGF-like, fibronectin type-III and laminin G-like domain-containing protein pr | EGFLAM                                               | 4       |   |
|   | IPI00428967 | Toll-like receptor adapter molecule 2                                                       | TICAM2;TMED                                          | 4       |   |
|   | IPI00455739 | Isoform 1 of Beta-1,3-N-acetylglucosaminyltransferase lunatic fringe                        | LFNG                                                 | 4       |   |
|   | IPI00171412 | Isoform 1 of Sulfatase-modifying factor 2 precursor                                         | SUMF2                                                | 4       |   |
| √ | √*          | IPI00182138                                                                                 | Isoform 2 of Granulins precursor                     | GRN     | 3 |
|   | √*          | IPI00016666                                                                                 | Metallothionein-3                                    | MT3     | 3 |
|   | √*          | IPI00029131                                                                                 | Neuroendocrine convertase 2 precursor                | PCSK2   | 3 |
|   | √*          | IPI00293723                                                                                 | Neurexophilin-4 precursor                            | NXPH4   | 3 |
|   | √*          | IPI00002334                                                                                 | Neuron-specific protein family member 1              | D4S234E | 3 |
| √ | √           | IPI00478414                                                                                 | Ventroptin (Fragment)                                | CHRDL1  | 3 |
| √ | √           | IPI00019176                                                                                 | Retinoic acid receptor responder protein 2 precursor | RARRES2 | 3 |
| √ | √           | IPI00382481                                                                                 | Ig heavy chain V-III region BUT                      | -       | 3 |
| √ | √           | IPI00022977                                                                                 | Creatine kinase B-type                               | CKB     | 3 |

|   |   |             |                                                                  |           |   |
|---|---|-------------|------------------------------------------------------------------|-----------|---|
| √ | √ | IPI00643667 | C1q and tumor necrosis factor related protein 3 isoform b        | C1QTNF3   | 3 |
| √ | √ | IPI00219219 | Galectin-1                                                       | LGALS1    | 3 |
| √ | √ | IPI00293757 | Isoform 1 of Netrin receptor UNC5C precursor                     | UNC5C     | 3 |
| √ | √ | IPI00011094 | Complement C1q tumor necrosis factor-related protein 4 precursor | C1QTNF4   | 3 |
| √ | √ | IPI00018396 | Cerebellin-4 precursor                                           | CBLN4     | 3 |
| √ | √ | IPI00465315 | Cytochrome c                                                     | CYCS      | 3 |
| √ | √ | IPI00026259 | N                                                                | AGA       | 3 |
| √ | √ | IPI00022394 | Complement C1q subcomponent subunit C precursor                  | C1QC      | 3 |
| √ | √ | IPI00024035 | Isoform 1 of Cadherin-6 precursor                                | CDH6      | 3 |
| √ | √ | IPI00022392 | Complement C1q subcomponent subunit A precursor                  | C1QA      | 3 |
| √ | √ | IPI00299150 | Cathepsin S precursor                                            | CTSS      | 3 |
| √ | √ | IPI00004114 | Ribonuclease K6 precursor                                        | RNASE6    | 3 |
| √ | √ | IPI00010896 | Chloride intracellular channel protein 1                         | CLIC1     | 3 |
| √ | √ | IPI00024273 | Isoform Long of Very low-density lipoprotein receptor precursor  | VLDLR     | 3 |
| √ | √ | IPI00020977 | Isoform 1 of Connective tissue growth factor precursor           | CTGF      | 3 |
| √ | √ | IPI00012011 | Cofilin-1                                                        | CFL1      | 3 |
| √ | √ | IPI00028931 | Desmoglein-2 precursor                                           | DSG2      | 3 |
| √ | √ | IPI00328703 | Out at first protein homolog precursor                           | OAF       | 3 |
| √ | √ | IPI00030739 | Apolipoprotein M                                                 | APOM      | 3 |
| √ | √ | IPI00031549 | Isoform 3A of Desmocollin-3 precursor                            | DSC3      | 3 |
| √ | √ | IPI00293849 | Receptor-type tyrosine-protein phosphatase mu precursor          | PTPRM     | 3 |
| √ | √ | IPI00385252 | Ig kappa chain V-III region GOL                                  | -         | 3 |
| √ | √ | IPI00789477 | Similar to Lactotransferrin precursor                            | LTF       | 3 |
| √ | √ | IPI00219575 | Bleomycin hydrolase                                              | BLMH      | 3 |
|   | √ | IPI00387120 | Ig kappa chain V-IV region Len                                   | -         | 3 |
|   | √ | IPI00011662 | Kunitz-type protease inhibitor 2 precursor                       | SPINT2    | 3 |
|   | √ | IPI00026991 | Polypeptide N-acetylgalactosaminyltransferase 6                  | GALNT6    | 3 |
|   | √ | IPI00030111 | Growth/differentiation factor 11 precursor                       | GDF11     | 3 |
|   | √ | IPI00013162 | Isoform 1 of OX-2 membrane glycoprotein precursor                | CD200     | 3 |
|   | √ | IPI00017745 | Metalloproteinase inhibitor 4 precursor                          | TIMP4     | 3 |
|   | √ | IPI00220361 | Calbindin                                                        | CALB1     | 3 |
|   | √ | IPI00374914 | hypothetical protein                                             | LOC401115 | 3 |
|   | √ | IPI00024105 | Complement C1q tumor necrosis factor-related protein 5 precursor | C1QTNF5   | 3 |
|   | √ | IPI00470625 | Neuritin precursor                                               | NRN1      | 3 |
|   | √ | IPI00307276 | ADAMTS-4 precursor                                               | ADAMTS4   | 3 |
| √ |   | IPI00383032 | Isoform 2 of Hepatitis A virus cellular receptor 2 precursor     | HAVCR2    | 3 |
| √ |   | IPI00219425 | Isoform Beta of Poliovirus receptor precursor                    | PVR       | 3 |
| √ |   | IPI00012269 | Multimerin-1 precursor                                           | MMRN1     | 3 |
| √ |   | IPI00788824 | Light chain Fab                                                  | IGLV1-44  | 3 |
| √ |   | IPI00022959 | Isoform 1 of Poliovirus receptor-related protein 3 precursor     | PVRL3     | 3 |

|   |             |                                                                            |          |   |
|---|-------------|----------------------------------------------------------------------------|----------|---|
| √ | IPI00477714 | V3-4 protein                                                               | IGLV8-61 | 3 |
| √ | IPI00019449 | Non-secretory ribonuclease precursor                                       | RNASE2   | 3 |
| √ | IPI00010182 | Isoform a 1 of Acyl-CoA-binding protein                                    | DBI      | 3 |
| √ | IPI00292496 | Beta-tubulin 4Q                                                            | TUBB8    | 3 |
| √ | IPI00297655 | Neurogenic locus notch homolog protein 2 precursor                         | NOTCH2   | 3 |
| √ | IPI00028015 | Isoform 2 of Leukocyte-associated immunoglobulin-like receptor 1 precursor | LAIR1    | 3 |
| √ | IPI00385253 | Ig kappa chain V-III region CLL precursor                                  | -        | 3 |
| √ | IPI00179851 | NDT80/PhoG like DNA-binding family protein                                 | C11orf9  | 3 |
| √ | IPI00021347 | Ubiquitin-conjugating enzyme E2 L3                                         | UBE2L3   | 3 |
| √ | IPI00029928 | Elastin                                                                    | ELN      | 3 |
| √ | IPI00401264 | Thioredoxin domain-containing protein 4 precursor                          | TXNDC4   | 3 |
| √ | IPI00015842 | Reticulocalbin-1 precursor                                                 | RCN1     | 3 |
| √ | IPI00005222 | Ephrin type-B receptor 6 precursor                                         | EPHB6    | 3 |
| √ | IPI00440932 | Isoform 1 of ADAM 9 precursor                                              | ADAM9    | 3 |
| √ | IPI00184019 | Isoform 3 of Paired immunoglobulin-like type 2 receptor alpha precursor    | PILRA    | 3 |
| √ | IPI00414676 | Heat shock protein HSP 90-beta                                             | HSP90AB1 | 3 |
| √ | IPI00030871 | Pantetheinase precursor                                                    | VNN1     | 3 |
| √ | IPI00022674 | Isoform 1 of Oncostatin-M specific receptor subunit beta precursor         | OSMR     | 3 |
| √ | IPI00000044 | Platelet-derived growth factor B chain precursor                           | PDGFB    | 3 |
| √ | IPI00003799 | Isoform 2 of Heme-binding protein 2                                        | HEBP2    | 3 |
| √ | IPI00374732 | similar to peptidylprolyl isomerase A isoform 1                            | PPIAP19  | 3 |
| √ | IPI00289876 | Isoform 1 of Syntaxin-7                                                    | STX7     | 3 |
| √ | IPI00300725 | Keratin, type II cytoskeletal 6A                                           | KRT6A    | 3 |
| √ | IPI00018381 | Isoform 1 of Tolloid-like protein 1 precursor                              | TLL1     | 3 |
| √ | IPI00028082 | Reversion-inducing cysteine-rich protein with Kazal motifs precursor       | RECK     | 3 |
| √ | IPI00009826 | Carboxypeptidase B precursor                                               | CPB1     | 3 |
| √ | IPI00220301 | Peroxiredoxin-6                                                            | PRDX6    | 3 |
| √ | IPI00006130 | Uncharacterized calcium-binding protein KIAA0494                           | KIAA0494 | 3 |
| √ | IPI00157454 | Isoform 1 of Heparan-sulfate 6-O-sulfotransferase 2                        | HS6ST2   | 3 |
| √ | IPI00062037 | Dynein light chain 2, cytoplasmic                                          | DYNLL2   | 3 |
| √ | IPI00019755 | Glutathione transferase omega-1                                            | GSTO1    | 3 |
| √ | IPI00220362 | 10 kDa heat shock protein, mitochondrial                                   | HSPE1    | 3 |
| √ | IPI00739099 | Collagen alpha-2(V) chain precursor                                        | COL5A2   | 3 |
| √ | IPI00220766 | Lactoylglutathione lyase                                                   | GLO1     | 3 |
| √ | IPI00552852 | V2-19 protein                                                              | IGLV3-27 | 3 |
| √ | IPI00107731 | Isoform 6 of Osteoclast associated immunoglobulin-like receptor precursor  | OSCAR    | 3 |
| √ | IPI00293464 | DNA damage-binding protein 1                                               | DDB1     | 3 |
| √ | IPI00018146 | 14-3-3 protein theta                                                       | YWHAQ    | 3 |
| √ | IPI00029817 | Sialidase-1 precursor                                                      | NEU1     | 3 |
| √ | IPI00219129 | Ribosylidihydronicotinamide dehydrogenase                                  | NQO2     | 3 |

|   |             |                                                                       |             |   |
|---|-------------|-----------------------------------------------------------------------|-------------|---|
| √ | IPI00184094 | UDP-GlcNAc:betaGal beta-1,3-N-acetylglucosaminyltransferase 8         | B3GNT8      | 3 |
| √ | IPI00219910 | 22 kDa protein                                                        | -           | 3 |
| √ | IPI00398918 | Putative uncharacterized protein DKFZp686I21167                       | DKFZp686O24 | 3 |
| √ | IPI00552267 | Similar to V2-13 protein                                              | IGLV3-19    | 3 |
| √ | IPI00031708 | Fumarylacetoacetase                                                   | FAH         | 3 |
| √ | IPI00022774 | Transitional endoplasmic reticulum ATPase                             | VCP         | 3 |
| √ | IPI00026240 | ADP-ribosyl cyclase 2 precursor                                       | BST1        | 3 |
| √ | IPI00005722 | Tyrosine-protein kinase receptor                                      | FLT3        | 3 |
| √ | IPI00169285 | Putative phospholipase B-like 2 precursor                             | P76         | 3 |
| √ | IPI00396378 | Isoform B1 of Heterogeneous nuclear ribonucleoproteins A2/B1          | HNRNPA2B1   | 3 |
| √ | IPI00299758 | Carbohydrate sulfotransferase 12                                      | CHST12      | 3 |
| √ | IPI00007960 | Isoform 1 of Periostin precursor                                      | POSTN       | 3 |
| √ | IPI00387117 | Ig kappa chain V-III region Ti                                        | IGKV3D-20   | 3 |
| √ | IPI00005809 | Serum deprivation-response protein                                    | SDPR        | 3 |
| √ | IPI00008556 | Isoform 1 of Coagulation factor XI precursor                          | F11         | 3 |
| √ | IPI00027463 | Protein S100-A6                                                       | S100A6      | 3 |
| √ | IPI00297252 | Isoform 1 of Extracellular sulfatase Sulf-2 precursor                 | SULF2       | 3 |
| √ | IPI00303476 | ATP synthase subunit beta, mitochondrial precursor                    | ATP5B       | 3 |
| √ | IPI00410487 | Isoform 1 of Twisted gastrulation protein homolog 1 precursor         | TWSG1       | 3 |
| √ | IPI00025447 | Elongation factor 1-alpha                                             | EEF1A1      | 3 |
| √ | IPI00029168 | Apolipoprotein                                                        | LPA         | 3 |
| √ | IPI00299145 | Keratin, type II cytoskeletal 6C                                      | KRT6C       | 3 |
|   | IPI00005123 | Ephrin-A3 precursor                                                   | EFNA3       | 3 |
|   | IPI00297181 | Cadherin-7 precursor                                                  | CDH7        | 3 |
|   | IPI00387119 | Ig kappa chain V-III region POM                                       | -           | 3 |
|   | IPI00030882 | Isoform Flop of Glutamate receptor 2 precursor                        | GRIA2       | 3 |
|   | IPI00884080 | Similar to Immunglobulin heavy chain variable region                  | -           | 3 |
|   | IPI00411656 | Isoform 1 of Protein piccolo                                          | PCLO        | 3 |
|   | IPI00375879 | Uncharacterized protein KIAA1467                                      | KIAA1467    | 3 |
|   | IPI00032050 | WW domain-binding protein 2                                           | WBP2        | 3 |
|   | IPI00026285 | Sia-alpha-2,3-Gal-beta-1,4-GlcNAc-R:alpha 2,8-sialyltransferase       | ST8SIA3     | 3 |
|   | IPI00402293 | Arylsulfatase G precursor                                             | ARSG        | 3 |
|   | IPI00384402 | Myosin-reactive immunoglobulin kappa chain variable region (Fragment) | -           | 3 |
|   | IPI00829740 | V2-6 protein                                                          | -           | 3 |
|   | IPI00006444 | Isoform 1 of Sodium/potassium/calcium exchanger 2 precursor           | SLC24A2     | 3 |
|   | IPI00024929 | Adipocyte adhesion molecule precursor                                 | ASAM        | 3 |
|   | IPI00020747 | Sodium channel subunit beta-3 precursor                               | SCN3B       | 3 |
|   | IPI00829812 | Uncharacterized protein ENSP00000375011                               | -           | 3 |
|   | IPI00293971 | Sodium/potassium-transporting ATPase subunit beta-2                   | ATP1B2      | 3 |
|   | IPI00884092 | Anti-HER3 scFv (Fragment)                                             | -           | 3 |

|             |                                                                              |             |   |
|-------------|------------------------------------------------------------------------------|-------------|---|
| IPI00022891 | ADP/ATP translocase 1                                                        | SLC25A4     | 3 |
| IPI00783393 | Immunglobulin heavy chain variable region (Fragment)                         | -           | 3 |
| IPI00176398 | Isoform 1 of SLIT and NTRK-like protein 6 precursor                          | SLITRK6     | 3 |
| IPI00017562 | Isoform 2 of Latrophilin-2 precursor                                         | LPHN2       | 3 |
| IPI00010148 | Brain-specific polypeptide PEP-19                                            | PCP4        | 3 |
| IPI00883879 | Similar to Anti-IFN-G scFv                                                   | -           | 3 |
| IPI00299399 | Protein S100-B                                                               | S100B       | 3 |
| IPI00022649 | Isoform 1 of Solute carrier family 12 member 2                               | SLC12A2     | 3 |
| IPI00001633 | Leucine-rich repeat transmembrane protein FLRT2 precursor                    | FLRT2       | 3 |
| IPI00171438 | Thioredoxin domain-containing protein 5 precursor                            | TXNDC5;MUTE | 3 |
| IPI00376131 | Similar to Leucine rich repeat neuronal 6C                                   | LINGO3      | 3 |
| IPI00005517 | Ephrin-A5 precursor                                                          | EFNA5       | 3 |
| IPI00827581 | Variable immunoglobulin anti-estradiol heavy chain (Fragment)                | -           | 3 |
| IPI00827637 | K light chain variable region (Fragment)                                     | -           | 3 |
| IPI00298650 | ADAMTS-8 precursor                                                           | ADAMTS8     | 3 |
| IPI00873863 | Brain-derived neurotrophic factor transcript variant 5                       | BDNF        | 3 |
| IPI00000760 | N(G),N(G)-dimethylarginine dimethylaminohydrolase 2                          | DDAH2       | 3 |
| IPI00102575 | ATPase family, AAA domain containing 5                                       | ATAD5       | 3 |
| IPI00472754 | Polycystic kidney disease 1-related protein                                  | KIAA0319L   | 3 |
| IPI00013701 | Nociceptin precursor                                                         | PNOC        | 3 |
| IPI00784368 | Isoform 1 of Bifunctional heparan sulfate N-deacetylase/N-sulfotransferase 1 | NDST1       | 3 |
| IPI00884389 | Similar to Immunglobulin heavy chain variable region                         | -           | 3 |
| IPI00854644 | Uncharacterized protein ENSP00000374805                                      | -           | 3 |
| IPI00016621 | Adaptor-related protein complex 2, alpha 2 subunit variant (Fragment)        | AP2A2       | 3 |
| IPI00387116 | Ig kappa chain V-III region NG9 precursor (Fragment)                         | -           | 3 |
| IPI00384392 | Myosin-reactive immunoglobulin heavy chain variable region (Fragment)        | -           | 3 |
| IPI00827876 | Heavy chain Fab (Fragment)                                                   | -           | 3 |
| IPI00018941 | Calcitonin gene-related peptide 2 precursor                                  | CALCB       | 3 |
| IPI00883765 | Similar to Immunglobulin heavy chain variable region                         | -           | 3 |
| IPI00748265 | Rheumatoid factor RF-ET13                                                    | -           | 3 |
| IPI00006556 | hypothetical protein LOC9865                                                 | KIAA0644    | 3 |
| IPI00374590 | cancer susceptibility candidate 4 isoform a                                  | CASC4       | 3 |
| IPI00018860 | NKG2D ligand 2 precursor                                                     | ULBP2       | 3 |
| IPI00556391 | Actin-like protein (Fragment)                                                | -           | 3 |
| IPI00883711 | Similar to Anti-(ED-B) scFV                                                  | -           | 3 |
| IPI00441344 | Beta-galactosidase precursor                                                 | GLB1        | 3 |
| IPI00019862 | butyrophilin, subfamily 2, member A1 isoform 2 precursor                     | BTN2A1      | 3 |
| IPI00019600 | Ubiquitin-conjugating enzyme E2 variant 2                                    | UBE2V2      | 3 |
| IPI00827829 | HRV Fab N8-VL (Fragment)                                                     | -           | 3 |
| IPI00829841 | 13 kDa protein                                                               | -           | 3 |

|   |             |                                                                                      |                                                        |          |   |
|---|-------------|--------------------------------------------------------------------------------------|--------------------------------------------------------|----------|---|
|   | IPI00031506 | Potassium/sodium hyperpolarization-activated cyclic nucleotide-gated channel 1       | HCN1                                                   | 3        |   |
|   | IPI00293539 | Isoform 2 of Cadherin-11 precursor                                                   | CDH11                                                  | 3        |   |
|   | IPI00010470 | Isoform SNAP-25b of Synaptosomal-associated protein 25                               | SNAP25                                                 | 3        |   |
|   | IPI00011899 | BMP and activin membrane-bound inhibitor homolog precursor                           | BAMBI                                                  | 3        |   |
|   | IPI00024587 | D1 dopamine receptor-interacting protein calcyon                                     | CALY                                                   | 3        |   |
|   | IPI00005516 | Leucine-rich repeat-containing protein 4 precursor                                   | LRRC4                                                  | 3        |   |
|   | IPI00012510 | EMILIN-2 precursor                                                                   | EMILIN2                                                | 3        |   |
|   | IPI00217376 | Isoform 1 of Sodium channel subunit beta-4 precursor                                 | SCN4B                                                  | 3        |   |
|   | IPI00553138 | Vesicle-associated membrane protein 2                                                | VAMP2                                                  | 3        |   |
|   | IPI00020396 | Isoform PACE4A-I of Proprotein convertase subtilisin/kexin type 6 precursor          | PCSK6                                                  | 3        |   |
|   | IPI00000832 | Beta-neoendorphin-dynorphin precursor                                                | PDYN                                                   | 3        |   |
|   | IPI00760721 | 13 kDa protein                                                                       | -                                                      | 3        |   |
|   | IPI00465377 | Isoform 1 of Matrix-remodeling-associated protein 7                                  | MXRA7                                                  | 3        |   |
|   | IPI00828105 | Anti-Mpl scFv (Fragment)                                                             | -                                                      | 3        |   |
|   | IPI00743194 | Kappa light chain variable region (Fragment)                                         | -                                                      | 3        |   |
|   | IPI00387024 | Ig kappa chain V-I region CAR                                                        | -                                                      | 3        |   |
|   | IPI00444605 | CDNA FLJ45296 fis, clone BRHIP3003340, moderately similar to Actin, alpha skeletal m | -                                                      | 3        |   |
|   | IPI00304577 | Isoform A of AP-2 complex subunit alpha-1                                            | AP2A1                                                  | 3        |   |
|   | IPI00301364 | Isoform 1 of S-phase kinase-associated protein 1A                                    | SKP1                                                   | 3        |   |
|   | IPI00030847 | Transmembrane 9 superfamily member 3 precursor                                       | TM9SF3                                                 | 3        |   |
|   | IPI00008533 | Isoform Long of Matrix metalloproteinase-17 precursor                                | MMP17                                                  | 3        |   |
|   | IPI00657742 | Major histocompatibility complex, class I, F                                         | HLA-F                                                  | 3        |   |
|   | IPI00218667 | Stathmin-2                                                                           | STMN2                                                  | 3        |   |
|   | IPI00008997 | WAP four-disulfide core domain protein 1 precursor                                   | WFDC1                                                  | 3        |   |
|   | IPI00165125 | Isoform 1 of Uncharacterized protein C14orf37 precursor                              | C14orf37                                               | 3        |   |
|   | IPI00012048 | Nucleoside diphosphate kinase A                                                      | NME2;NME1                                              | 3        |   |
|   | IPI00418960 | Isoform 3 of Protein NDRG4                                                           | NDRG4                                                  | 3        |   |
|   | IPI00168847 | Isoform 2 of Hyaluronidase-1 precursor                                               | HYAL1                                                  | 3        |   |
|   | IPI00168921 | Putative polypeptide N-acetylgalactosaminyltransferase-like protein 3                | WBSCR17                                                | 3        |   |
|   | IPI00184851 | Type 2 lactosamine alpha-2,3-sialyltransferase                                       | ST3GAL6                                                | 3        |   |
|   | IPI00027507 | Complement factor H-related protein 3 precursor                                      | CFHR3                                                  | 3        |   |
|   | IPI00081836 | Histone H2A type 1-H                                                                 | HIST1H2AH                                              | 3        |   |
|   | IPI00397645 | Isoform 2 of Matrix-remodeling-associated protein 7                                  | MXRA7                                                  | 3        |   |
|   | √*          | IPI00220748                                                                          | Isoform Alpha-7X1A of Integrin alpha-7 precursor       | ITGA7    | 2 |
|   | √*          | IPI00019771                                                                          | Fractalkine precursor                                  | CX3CL1   | 2 |
|   | √*          | IPI00016014                                                                          | Isoform 1 of Integral membrane protein 2C              | ITM2C    | 2 |
|   | √*          | IPI00301180                                                                          | Isoform 2 of Solute carrier family 12 member 5         | SLC12A5  | 2 |
| √ | √           | IPI00005038                                                                          | Ribonuclease UK114                                     | HRSP12   | 2 |
| √ | √           | IPI00010402                                                                          | Putative uncharacterized protein                       | SH3BGRL3 | 2 |
| √ | √           | IPI00303161                                                                          | Endothelial cell-selective adhesion molecule precursor | ESAM     | 2 |

|   |   |             |                                                                                        |          |   |
|---|---|-------------|----------------------------------------------------------------------------------------|----------|---|
| √ | √ | IPI00022389 | Isoform 1 of C-reactive protein precursor                                              | CRP      | 2 |
| √ | √ | IPI00419442 | IGLV6-57 protein                                                                       | IGLV6-57 | 2 |
| √ | √ | IPI00004573 | Polymeric immunoglobulin receptor precursor                                            | PIGR     | 2 |
| √ | √ | IPI00257882 | Xaa-Pro dipeptidase                                                                    | PEPD     | 2 |
| √ | √ | IPI00293276 | Macrophage migration inhibitory factor                                                 | MIF      | 2 |
| √ | √ | IPI00025812 | Carbonic anhydrase-related protein 11 precursor                                        | CA11     | 2 |
| √ | √ | IPI00291488 | Isoform 1 of WAP four-disulfide core domain protein 2 precursor                        | WFDC2    | 2 |
| √ | √ | IPI00382478 | Ig heavy chain V-III region TIL                                                        | -        | 2 |
| √ | √ | IPI00007047 | Protein S100-A8                                                                        | S100A8   | 2 |
| √ | √ | IPI00413641 | Aldose reductase                                                                       | AKR1B1   | 2 |
| √ | √ | IPI00027444 | Leukocyte elastase inhibitor                                                           | SERPINB1 | 2 |
| √ | √ | IPI00299083 | Junctional adhesion molecule B precursor                                               | JAM2     | 2 |
| √ | √ | IPI00299547 | Neutrophil gelatinase-associated lipocalin precursor                                   | LCN2     | 2 |
| √ | √ | IPI00170814 | PTK7 protein tyrosine kinase 7 isoform b precursor                                     | PTK7     | 2 |
| √ | √ | IPI00009890 | Glia-derived nexin precursor                                                           | SERPINE2 | 2 |
| √ | √ | IPI00219468 | Isoform IIa of Profilin-2                                                              | PFN2     | 2 |
| √ | √ | IPI00413344 | Cofilin-2                                                                              | CFL2     | 2 |
| √ | √ | IPI00008586 | Isoform 1 of Chondroitin sulfate proteoglycan 5 precursor                              | CSPG5    | 2 |
| √ | √ | IPI00006524 | Uncharacterized protein KIAA0319 precursor                                             | KIAA0319 | 2 |
| √ | √ | IPI00026800 | Scrapie-responsive protein 1 precursor                                                 | SCRG1    | 2 |
| √ | √ | IPI00216461 | Acyolphosphatase-2                                                                     | ACYP2    | 2 |
| √ | √ | IPI00735451 | Uncharacterized protein ENSP00000375035                                                | -        | 2 |
| √ | √ | IPI00075013 | Complement C1q tumor necrosis factor-related protein 1 precursor                       | C1QTNF1  | 2 |
| √ | √ | IPI00006009 | Isoform 2 of Pleckstrin homology domain-containing family B member 1                   | PLEKHB1  | 2 |
| √ | √ | IPI00329332 | Syntaxin-12                                                                            | STX12    | 2 |
| √ | √ | IPI00384400 | Myosin-reactive immunoglobulin heavy chain variable region (Fragment)                  | -        | 2 |
| √ | √ | IPI00033466 | C-type lectin domain family 11 member A precursor                                      | CLEC11A  | 2 |
| √ | √ | IPI00289926 | leukocyte immunoglobulin-like receptor, subfamily B, member 4 isoform 2                | LILRB4   | 2 |
| √ | √ | IPI00016371 | Isoform JM-A of Receptor tyrosine-protein kinase erbB-4 precursor                      | ERBB4    | 2 |
| √ | √ | IPI00289862 | Secernin-1                                                                             | SCRN1    | 2 |
| √ | √ | IPI00013945 | Isoform 1 of Uromodulin precursor                                                      | UMOD     | 2 |
| √ | √ | IPI00465261 | Isoform 1 of Endoplasmic reticulum aminopeptidase 2                                    | ERAP2    | 2 |
| √ | √ | IPI00215997 | CD9 antigen                                                                            | CD9      | 2 |
| √ | √ | IPI00382476 | Ig heavy chain V-III region WEA                                                        | -        | 2 |
| √ | √ | IPI00024307 | Ephrin-B1 precursor                                                                    | EFNB1    | 2 |
| √ | √ | IPI00294713 | Isoform 1 of Mannan-binding lectin serine protease 2 precursor                         | MASP2    | 2 |
| √ | √ | IPI00554752 | cAMP-dependent protein kinase type II-beta regulatory subunit                          | PRKAR2B  | 2 |
| √ | √ | IPI00306844 | Corticotropin-releasing factor-binding protein precursor                               | CRHBP    | 2 |
| √ | √ | IPI00384016 | Full-length cDNA 5-PRIME end of clone CS0DJ009YL13 of T cells (Jurkat cell line) of Ho | DLST     | 2 |
| √ | √ | IPI00477868 | LAMA5 protein                                                                          | LAMA5    | 2 |



|   |             |                                                                                    |          |   |
|---|-------------|------------------------------------------------------------------------------------|----------|---|
| √ | IPI00022640 | Neurogranin                                                                        | NRGN     | 2 |
| √ | IPI00644346 | ADAMTS-like protein 2 precursor                                                    | ADAMTSL2 | 2 |
| √ | IPI00027847 | Lipoprotein lipase precursor                                                       | LPL      | 2 |
| √ | IPI00009867 | Keratin, type II cytoskeletal 5                                                    | KRT5     | 2 |
| √ | IPI00002966 | Heat shock 70 kDa protein 4                                                        | HSPA4    | 2 |
| √ | IPI00029756 | Proto-oncogene tyrosine-protein kinase MER precursor                               | MERTK    | 2 |
| √ | IPI00007853 | Gamma-interferon-inducible lysosomal thiol reductase precursor                     | IFI30    | 2 |
| √ | IPI00465322 | Uncharacterized protein BOC                                                        | BOC      | 2 |
| √ | IPI00103755 | Isoform 2 of Netrin receptor UNC5D precursor                                       | UNC5D    | 2 |
| √ | IPI00550533 | Isoform 1 of Uncharacterized protein C1orf56 precursor                             | C1orf56  | 2 |
| √ | IPI00002283 | Isoform 2 of Patched domain-containing protein 2                                   | PTCHD2   | 2 |
| √ | IPI00419565 | Isoform 1 of Stabilin-1 precursor                                                  | STAB1    | 2 |
| √ | IPI00029623 | Proteasome subunit alpha type-6                                                    | PSMA6    | 2 |
| √ | IPI00171199 | Isoform 2 of Proteasome subunit alpha type-3                                       | PSMA3    | 2 |
| √ | IPI00149097 | Semaphorin-4A precursor                                                            | SEMA4A   | 2 |
| √ | IPI00021834 | Isoform Alpha of Tissue factor pathway inhibitor precursor                         | TFPI     | 2 |
| √ | IPI00001610 | Insulin-like growth factor IA precursor                                            | IGF1     | 2 |
| √ | IPI00001592 | Isoform 2 of Transmembrane glycoprotein NMB precursor                              | GPNMB    | 2 |
| √ | IPI00382682 | Putative matrix cell adhesion molecule-3                                           | -        | 2 |
| √ | IPI00061354 | Isoform 2 of Bromodomain adjacent to zinc finger domain protein 2B                 | BAZ2B    | 2 |
| √ | IPI00009054 | Isoform BMP1-3 of Bone morphogenetic protein 1 precursor                           | BMP1     | 2 |
| √ | IPI00297779 | T-complex protein 1 subunit beta                                                   | CCT2     | 2 |
| √ | IPI00168920 | collagen, type XXIV, alpha 1                                                       | COL24A1  | 2 |
| √ | IPI00215980 | Isoform Alpha of Poliovirus receptor-related protein 2 precursor                   | PVRL2    | 2 |
| √ | IPI00100154 | Toll-interacting protein                                                           | TOLLIP   | 2 |
| √ | IPI00021997 | Protein CREG1 precursor                                                            | CREG1    | 2 |
| √ | IPI00418169 | annexin A2 isoform 1                                                               | ANXA2    | 2 |
| √ | IPI00012315 | Nucleoside diphosphate kinase 3                                                    | NME3     | 2 |
| √ | IPI00552943 | V1-11 protein                                                                      | IGLV1-36 | 2 |
| √ | IPI00008726 | Iron-responsive element-binding protein 2                                          | IREB2    | 2 |
| √ | IPI00021727 | C4b-binding protein alpha chain precursor                                          | C4BPA    | 2 |
| √ | IPI00411706 | S-formylglutathione hydrolase                                                      | ESD      | 2 |
| √ | IPI00027972 | Isoform 1 of Leukocyte immunoglobulin-like receptor subfamily A member 2 precursor | LILRA2   | 2 |
| √ | IPI00383951 | Isoform 3 of Protein sidekick-1 precursor                                          | SDK1     | 2 |
| √ | IPI00099650 | Protein jagged-1 precursor                                                         | JAG1     | 2 |
| √ | IPI00008756 | Isoform 1 of Bullous pemphigoid antigen 1, isoforms 1/2/3/4/5/8 (Fragment)         | DST      | 2 |
| √ | IPI00008164 | Prolyl endopeptidase                                                               | PREP     | 2 |
| √ | IPI00002511 | Cyclic AMP-dependent transcription factor ATF-6 alpha                              | ATF6     | 2 |
| √ | IPI00009901 | Nuclear transport factor 2                                                         | NUTF2    | 2 |
| √ | IPI00009477 | Intercellular adhesion molecule 2 precursor                                        | ICAM2    | 2 |

|   |             |                                                                                              |          |   |
|---|-------------|----------------------------------------------------------------------------------------------|----------|---|
| √ | IPI00012792 | Cadherin-5 precursor                                                                         | CDH5     | 2 |
| √ | IPI00412492 | Isoform 1 of Plexin-D1 precursor                                                             | PLXND1   | 2 |
| √ | IPI00178352 | Isoform 1 of Filamin-C                                                                       | FLNC     | 2 |
| √ | IPI00413587 | Isoform 1 of BH3-interacting domain death agonist                                            | BID      | 2 |
| √ | IPI00017334 | Prohibitin                                                                                   | PHB      | 2 |
| √ | IPI00044600 | VPS10 domain-containing receptor SorCS2 precursor                                            | SORCS2   | 2 |
| √ | IPI00012007 | Adenosylhomocysteinase                                                                       | AHCY     | 2 |
| √ | IPI00441498 | Folate receptor alpha precursor                                                              | FOLR1    | 2 |
| √ | IPI00004457 | Membrane copper amine oxidase                                                                | AOC3     | 2 |
| √ | IPI00382493 | Ig heavy chain V-III region WAS                                                              | -        | 2 |
| √ | IPI00337612 | Discoidin, CUB and LCCL domain-containing protein 1 precursor                                | DCBLD1   | 2 |
| √ | IPI00024466 | UDP-glucose ceramide glucosyltransferase-like 1 isoform 1                                    | UGCGL1   | 2 |
| √ | IPI00012009 | Isoform 1 of Granulocyte-macrophage colony-stimulating factor receptor alpha chain precursor | CSF2RA   | 2 |
| √ | IPI00217963 | Keratin, type I cytoskeletal 16                                                              | KRT16    | 2 |
| √ | IPI00382488 | Ig heavy chain V-III region HIL                                                              | -        | 2 |
| √ | IPI00022445 | Platelet basic protein precursor                                                             | PPBP     | 2 |
| √ | IPI00006510 | Tubulin beta-1 chain                                                                         | TUBB1    | 2 |
| √ | IPI00000914 | Isoform 1 of Calcitonin precursor                                                            | CALCA    | 2 |
| √ | IPI00299116 | Podocalyxin-like protein 1 precursor                                                         | PODXL    | 2 |
| √ | IPI00400935 | Isoform 1 of Collagen alpha-1(XVI) chain precursor                                           | COL16A1  | 2 |
| √ | IPI00783156 | Bone morphogenetic protein receptor type-2 precursor                                         | BMPR2    | 2 |
| √ | IPI00176581 | Isoform 1 of Fanconi anemia group M protein                                                  | FANCM    | 2 |
| √ | IPI00023191 | Target of myb1                                                                               | TOM1     | 2 |
| √ | IPI00217005 | Ankyrin repeat domain-containing protein 18A                                                 | ANKRD18A | 2 |
| √ | IPI00219682 | Erythrocyte band 7 integral membrane protein                                                 | STOM     | 2 |
| √ | IPI00029700 | Isoform Long of Down syndrome cell adhesion molecule precursor                               | DSCAM    | 2 |
| √ | IPI00024919 | Thioredoxin-dependent peroxide reductase, mitochondrial precursor                            | PRDX3    | 2 |
| √ | IPI00022039 | Isoform 3 of SLAM family member 5 precursor                                                  | CD84     | 2 |
| √ | IPI00004047 | Isoform 1 of Exostosin-2                                                                     | EXT2     | 2 |
| √ | IPI00387106 | Ig kappa chain V-I region Ni                                                                 | -        | 2 |
| √ | IPI00305975 | Spondin-2 precursor                                                                          | SPON2    | 2 |
| √ | IPI00440493 | ATP synthase subunit alpha, mitochondrial precursor                                          | ATP5A1   | 2 |
| √ | IPI00419237 | Isoform 1 of Cytosol aminopeptidase                                                          | LAP3     | 2 |
| √ | IPI00024067 | Isoform 1 of Clathrin heavy chain 1                                                          | CLTC     | 2 |
| √ | IPI00218795 | L-selectin precursor                                                                         | SELL     | 2 |
| √ | IPI00382482 | Ig heavy chain V-III region CAM                                                              | -        | 2 |
| √ | IPI00292657 | NADP-dependent leukotriene B4 12-hydroxydehydrogenase                                        | LTB4DH   | 2 |
| √ | IPI00216694 | plastin 3                                                                                    | PLS3     | 2 |
| √ | IPI00384395 | Myosin-reactive immunoglobulin heavy chain variable region                                   | -        | 2 |
| √ | IPI00023754 | Protein kinase C-binding protein NELL1 precursor                                             | NELL1    | 2 |

√

|             |                                                                                             |          |   |
|-------------|---------------------------------------------------------------------------------------------|----------|---|
| IPI00019904 | Isoform 1 of Beta-adducin                                                                   | ADD2     | 2 |
| IPI00829827 | Uncharacterized protein ENSP00000374804                                                     | -        | 2 |
| IPI00219806 | Protein S100-A7                                                                             | S100A7   | 2 |
| IPI00873344 | N8 protein long isoform (Fragment)                                                          | TPD52    | 2 |
| IPI00552939 | Isoform 1 of Complement C1q-like protein 3 precursor                                        | C1QL3    | 2 |
| IPI00827939 | Anti-mucin1 light chain variable region (Fragment)                                          | -        | 2 |
| IPI00065312 | N-acetyl-beta-glucosaminyl-glycoprotein 4-beta-N- acetylglactosaminyltransferase 1          | B4GALNT4 | 2 |
| IPI00152524 | Isoform 3 of Neuropilin and tolloid-like protein 1 precursor                                | NETO1    | 2 |
| IPI00182194 | Teneurin-2                                                                                  | ODZ2     | 2 |
| IPI00165936 | Isoform A of Chloride intracellular channel 6                                               | CLIC6    | 2 |
| IPI00783818 | Immunglobulin heavy chain variable region (Fragment)                                        | -        | 2 |
| IPI00242905 | Uncharacterized protein ENSP00000344689 (Fragment)                                          | -        | 2 |
| IPI00022890 | Ig lambda chain V region 4A precursor                                                       | IGLV7-43 | 2 |
| IPI00026546 | Platelet-activating factor acetylhydrolase IB subunit beta                                  | PAFAH1B2 | 2 |
| IPI00293460 | ATP-binding cassette sub-family A member 1                                                  | ABCA1    | 2 |
| IPI00032227 | Isoform 1 of Rabphilin-3A                                                                   | RPH3A    | 2 |
| IPI00064377 | Tumor necrosis factor receptor superfamily member 19L precursor                             | RELT     | 2 |
| IPI00816775 | F5-20 (Fragment)                                                                            | -        | 2 |
| IPI00298476 | Isoform 1 of Gremlin-1 precursor                                                            | GREM1    | 2 |
| IPI00830035 | Similar to Anti-streptococcal/anti-myosin immunoglobulin kappa light chain variable region- | -        | 2 |
| IPI00002320 | Leucine-rich repeat transmembrane protein FLRT3 precursor                                   | FLRT3    | 2 |
| IPI00166613 | Isoform 1 of Putative polypeptide N-acetylglactosaminyltransferase-like protein 1           | GALNTL1  | 2 |
| IPI00001120 | CDNA FLJ31810 fis, clone NT2RI2009289, weakly similar to CARBOXYPEPTIDASE N 8               | LINGO2   | 2 |
| IPI00382442 | Ig lambda chain V-V region DEL                                                              | -        | 2 |
| IPI00008202 | Headcase protein homolog                                                                    | HECA     | 2 |
| IPI00024580 | Methylcrotonoyl-CoA carboxylase subunit alpha, mitochondrial precursor                      | MCCC1    | 2 |
| IPI00328431 | Isoform 1 of Netrin receptor UNC5B precursor                                                | UNC5B    | 2 |
| IPI00829834 | Ig kappa chain V-III region VH precursor                                                    | -        | 2 |
| IPI00306576 | Arylsulfatase B precursor                                                                   | ARSB     | 2 |
| IPI00854624 | Uncharacterized protein ENSP00000375043                                                     | -        | 2 |
| IPI00003391 | Teneurin-1                                                                                  | ODZ1     | 2 |
| IPI00178727 | Novel protein                                                                               | C10orf79 | 2 |
| IPI00383680 | Ribophorin II                                                                               | RPN2     | 2 |
| IPI00000871 | Prolactin                                                                                   | PRL      | 2 |
| IPI00181079 | Meteorin-like protein precursor                                                             | METRNL   | 2 |
| IPI00020884 | Plexin-A3 precursor                                                                         | PLXNA3   | 2 |
| IPI00008148 | Isoform 1 of GDNF family receptor alpha-1 precursor                                         | GFRA1    | 2 |
| IPI00018246 | Isoform 1 of Hexokinase-1                                                                   | HK1      | 2 |
| IPI00827839 | VK3 protein (Fragment)                                                                      | -        | 2 |
| IPI00640292 | Isoform 1 of Protein G7c precursor                                                          | C6orf27  | 2 |

|             |                                                                            |             |   |
|-------------|----------------------------------------------------------------------------|-------------|---|
| IPI00396930 | Uncharacterized protein ENSP00000353216 (Fragment)                         | -           | 2 |
| IPI00829810 | Uncharacterized protein ENSP00000375027                                    | -           | 2 |
| IPI00001872 | Isoform 1 of Protocadherin gamma C3 precursor                              | PCDHGC3;PCI | 2 |
| IPI00175989 | Rho family guanine-nucleotide exchange factor                              | MCF2L2      | 2 |
| IPI00432766 | Isoform 2 of Netrin-G2 precursor                                           | NTNG2       | 2 |
| IPI00300623 | Pro-MCH precursor                                                          | PMCH        | 2 |
| IPI00011865 | Isoform 2 of Platelet-derived growth factor D precursor                    | PDGFD       | 2 |
| IPI00015479 | UPF0454 protein C12orf49 precursor                                         | C12orf49    | 2 |
| IPI00294619 | Protein TFG                                                                | TFG         | 2 |
| IPI00003441 | Isoform 1 of Protein C1orf9 precursor                                      | C1orf9      | 2 |
| IPI00043810 | Isoform 1 of Proline-rich transmembrane protein 1                          | PRRT1       | 2 |
| IPI00024976 | Mitochondrial import receptor subunit TOM22 homolog                        | TOMM22      | 2 |
| IPI00550949 | Bone morphogenetic protein 7 precursor                                     | BMP7        | 2 |
| IPI00006034 | Cysteine-rich protein 2                                                    | CRIP2       | 2 |
| IPI00297180 | Cadherin-9 precursor                                                       | CDH9        | 2 |
| IPI00003527 | Ezrin-radixin-moesin-binding phosphoprotein 50                             | SLC9A3R1    | 2 |
| IPI00061520 | hypothetical protein LOC84752                                              | MGC4655     | 2 |
| IPI00219420 | Structural maintenance of chromosomes protein 3                            | SMC3        | 2 |
| IPI00005774 | Isoform 1 of Low-density lipoprotein receptor-related protein 8 precursor  | LRP8        | 2 |
| IPI00879950 | 15 kDa protein                                                             | -           | 2 |
| IPI00004494 | Semaphorin-3E precursor                                                    | SEMA3E      | 2 |
| IPI00396383 | Isoform 1 of von Willebrand factor A domain-containing protein 1 precursor | VWA1        | 2 |
| IPI00454695 | Histone H2B type 2-C                                                       | HIST2H2BC   | 2 |
| IPI00031718 | Isoform 1 of Ectonucleoside triphosphate diphosphohydrolase 4              | ENTPD4      | 2 |
| IPI00021119 | Carbohydrate sulfotransferase 1                                            | CHST1       | 2 |
| IPI00004488 | Vacuolar proton pump subunit F                                             | ATP6V1F     | 2 |
| IPI00514517 | V4-1 protein                                                               | IGLV5-37    | 2 |
| IPI00009439 | Synaptotagmin-1                                                            | SYT1        | 2 |
| IPI00008504 | Carbonic anhydrase 14 precursor                                            | CA14        | 2 |
| IPI00789259 | V1-13 protein (Fragment)                                                   | IGLV1-40    | 2 |
| IPI00017557 | Secreted frizzled-related protein 4 precursor                              | SFRP4       | 2 |
| IPI00014223 | Netrin-G1 ligand precursor                                                 | LRRC4C      | 2 |
| IPI00216699 | Isoform 2 of Unc-112-related protein 2                                     | FERMT3      | 2 |
| IPI00044707 | Hyaluronan and proteoglycan link protein 4 precursor                       | HAPLN4;TM6S | 2 |
| IPI00216348 | Isoform 2C of Cytoplasmic dynein 1 intermediate chain 2                    | DYNC112     | 2 |
| IPI00176104 | Isoform 1 of SLIT and NTRK-like protein 2 precursor                        | SLITRK2     | 2 |
| IPI00328826 | Uncharacterized protein CADPS2                                             | CADPS2      | 2 |
| IPI00151036 | RING finger protein 13                                                     | RNF13       | 2 |
| IPI00020407 | Alpha-1,6-mannosylglycoprotein 6-beta-N-acetylglucosaminyltransferase A    | MGAT5       | 2 |
| IPI00289802 | Isoform 1 of CUB and sushi domain-containing protein 2                     | CSMD2       | 2 |

|             |                                                                                    |           |   |
|-------------|------------------------------------------------------------------------------------|-----------|---|
| IPI00328587 | Enolase                                                                            | ENO1P     | 2 |
| IPI00387105 | Ig kappa chain V-I region Mev                                                      | -         | 2 |
| IPI00396961 | Leucine-rich repeat and fibronectin type-III domain-containing protein 5 precursor | LRFN5     | 2 |
| IPI00024689 | Aquaporin-1                                                                        | AQP1      | 2 |
| IPI00741608 | similar to eukaryotic translation initiation factor 5A                             | EIF5AL3   | 2 |
| IPI00414294 | hypothetical protein                                                               | LOC729956 | 2 |
| IPI00019907 | Glypican-3 precursor                                                               | GPC3      | 2 |
| IPI00328680 | Multiple coagulation factor deficiency protein 2 precursor                         | MCFD2     | 2 |
| IPI00026031 | Uncharacterized protein C6orf72 precursor                                          | C6orf72   | 2 |
| IPI00219067 | Glutathione S-transferase Mu 2                                                     | GSTM2     | 2 |
| IPI00410079 | Isoform 1 of Protein FAM82C                                                        | FAM82C    | 2 |
| IPI00827929 | VH-3 family (VH26)D/J protein (Fragment)                                           | -         | 2 |
| IPI00019812 | Serine/threonine-protein phosphatase 5                                             | PPP5C     | 2 |
| IPI00010343 | Sodium/calcium exchanger 2 precursor                                               | SLC8A2    | 2 |
| IPI00023942 | Isoform 2 of Syndecan-3                                                            | SDC3      | 2 |
| IPI00305833 | Smu-1 suppressor of mec-8 and unc-52 protein homolog                               | SMU1      | 2 |
| IPI00550746 | Nuclear migration protein nudC                                                     | NUDC      | 2 |
| IPI00003470 | Ig kappa chain V-I region Wes                                                      | -         | 2 |
| IPI00028387 | Isoform 1 of Uncharacterized protein C20orf116 precursor                           | C20orf116 | 2 |
| IPI00009396 | Isoform 1 of Cannabinoid receptor 1                                                | CNR1      | 2 |
| IPI00828156 | NANUC-1 heavy chain (Fragment)                                                     | -         | 2 |
| IPI00181743 | Isoform 1 of BAI1-associated protein 3                                             | BAIAP3    | 2 |
| IPI00426727 | Isoform 1 of Methyl-CpG-binding domain protein 4                                   | MBD4      | 2 |
| IPI00552937 | NHL repeat containing 3 isoform a                                                  | NHLRC3    | 2 |
| IPI00787936 | similar to cathepsin L-like protein                                                | LOC644021 | 2 |
| IPI00031907 | Isoform 1 of Transmembrane protein 108 precursor                                   | TMEM108   | 2 |
| IPI00018879 | Alpha-L-iduronidase precursor                                                      | IDUA      | 2 |
| IPI00399089 | Mesoderm development candidate 2                                                   | MESDC2    | 2 |
| IPI00387097 | Ig kappa chain V-I region Lay                                                      | -         | 2 |
| IPI00007812 | Vacuolar ATP synthase subunit B, brain isoform                                     | ATP6V1B2  | 2 |
| IPI00170692 | Vesicle-associated membrane protein-associated protein A                           | VAPA      | 2 |
| IPI00854707 | Immunglobulin heavy chain variable region (Fragment)                               | -         | 2 |
| IPI00788258 | similar to lysyl oxidase-like 1 preproprotein                                      | LOXL1     | 2 |
| IPI00410675 | Syntaxin-1B                                                                        | STX1B     | 2 |
| IPI00045536 | Isoform 3 of Chitinase domain-containing protein 1 precursor                       | CHID1     | 2 |
| IPI00019180 | Glypican-5 precursor                                                               | GPC5      | 2 |
| IPI00008085 | Zinc transporter ZIP10 precursor                                                   | SLC39A10  | 2 |
| IPI00329538 | Prostasin precursor                                                                | PRSS8     | 2 |
| IPI00030634 | Isoform 1 of Gamma-glutamyltransferase 4 precursor                                 | GGTL3     | 2 |
| IPI00550677 | WSC domain-containing protein 1                                                    | WSCD1     | 2 |

|   |             |                                                                                       |                                                            |           |   |
|---|-------------|---------------------------------------------------------------------------------------|------------------------------------------------------------|-----------|---|
|   | IPI00029050 | Isoform 1 of Glycosyltransferase-like protein LARGE1                                  | LARGE                                                      | 2         |   |
|   | IPI00328520 | Isoform 2 of Proline-rich transmembrane protein 2                                     | PRRT2                                                      | 2         |   |
|   | IPI00749514 | attractin-like 1                                                                      | ATRNL1                                                     | 2         |   |
|   | IPI00220281 | Guanine nucleotide-binding protein G(o) subunit alpha 1                               | GNAO1                                                      | 2         |   |
|   | IPI00000087 | Sodium channel subunit beta-2 precursor                                               | SCN2B                                                      | 2         |   |
|   | IPI00010810 | Electron transfer flavoprotein subunit alpha, mitochondrial precursor                 | ETFFA                                                      | 2         |   |
|   | IPI00301812 | Isoform 1 of SPARC-related modular calcium-binding protein 1 precursor                | SMOC1                                                      | 2         |   |
|   | IPI00027239 | Isoform Alpha of Tumor necrosis factor ligand superfamily member 13 precursor         | TNFSF12-TNF                                                | 2         |   |
|   | IPI00847652 | CDNA FLJ46805 fis, clone TRACH3033535                                                 | LOC400891                                                  | 2         |   |
|   | IPI00250724 | Protein kinase-like domain containing protein                                         | C18orf51                                                   | 2         |   |
|   | IPI00024704 | Uronyl 2-sulfotransferase                                                             | UST                                                        | 2         |   |
|   | IPI00646291 | Integral membrane protein GPR180 precursor                                            | GPR180                                                     | 2         |   |
|   | IPI00021199 | Stathmin-3                                                                            | STMN3                                                      | 2         |   |
|   | IPI00020692 | Isoform 1 of Sodium channel protein type 3 subunit alpha                              | SCN3A                                                      | 2         |   |
|   | IPI00021091 | Isoform 1 of Leucine-rich glioma-inactivated protein 1 precursor                      | LGI1                                                       | 2         |   |
|   | IPI00021695 | Isoform D of Plasma membrane calcium-transporting ATPase 1                            | ATP2B1                                                     | 2         |   |
|   | IPI00413781 | chemokine (C-X-C motif) ligand 12 (stromal cell-derived factor 1) isoform gamma       | CXCL12                                                     | 2         |   |
|   | IPI00480159 | inositol polyphosphate-5-phosphatase F                                                | INPP5F                                                     | 2         |   |
|   | IPI00005690 | Matrilin-3 precursor                                                                  | MATN3                                                      | 2         |   |
|   | IPI00289746 | Isoform 2 of Serine/threonine-protein kinase PAK 1                                    | PAK1                                                       | 2         |   |
|   | IPI00295767 | Noelin-2 precursor                                                                    | OLFM2                                                      | 2         |   |
|   | IPI00296441 | Adenosine deaminase                                                                   | ADA                                                        | 2         |   |
|   | IPI00827906 | Anti-mucin1 light chain variable region (Fragment)                                    | -                                                          | 2         |   |
|   | IPI00383887 | Immunoglobulin heavy chain (Fragment)                                                 | -                                                          | 2         |   |
|   | IPI00385985 | Ig lambda chain V-III region LOI                                                      | -                                                          | 2         |   |
|   | IPI00064652 | vascular endothelial growth factor A isoform e precursor                              | VEGFA                                                      | 2         |   |
|   | IPI00024572 | aspartate beta-hydroxylase isoform e                                                  | ASPH                                                       | 2         |   |
|   | IPI00384407 | Myosin-reactive immunoglobulin heavy chain variable region (Fragment)                 | -                                                          | 2         |   |
|   | IPI00030431 | Isoform 1 of Anthrax toxin receptor 1 precursor                                       | ANTXR1                                                     | 2         |   |
|   | IPI00220706 | Hemoglobin subunit gamma-1                                                            | HBG1                                                       | 2         |   |
|   | IPI00028193 | 192 kDa protein                                                                       | KNDC1                                                      | 2         |   |
|   | IPI00000775 | Isoform 1 of Leucine-rich repeats and immunoglobulin-like domains protein 1 precursor | LRIG1                                                      | 2         |   |
|   | IPI00221117 | Acyolphosphatase-1                                                                    | C17orf13;ACYF                                              | 2         |   |
|   | IPI00646689 | Thioredoxin domain-containing protein 17                                              | TXNDC17                                                    | 2         |   |
|   | IPI00218319 | Isoform 2 of Tropomyosin alpha-3 chain                                                | TPM3                                                       | 2         |   |
| √ | √*          | IPI00004367                                                                           | FXYD domain-containing ion transport regulator 6 precursor | FXYD6     | 1 |
| √ | √*          | IPI00029591                                                                           | P-selectin glycoprotein ligand 1 precursor                 | SELPLG    | 1 |
| √ | √*          | IPI00552578                                                                           | Serum amyloid A protein precursor                          | SAA1;SAA2 | 1 |
| √ | √*          | IPI00301288                                                                           | polydom                                                    | SVEP1     | 1 |
|   | √*          | IPI00000160                                                                           | Proopiomelanocortin preproprotein                          | POMC      | 1 |

|    |             |                                                     |                                                             |           |   |
|----|-------------|-----------------------------------------------------|-------------------------------------------------------------|-----------|---|
| √* | IPI00032405 | Endothelin B receptor-like protein 2 precursor      | GPR37L1                                                     | 1         |   |
| √* | IPI00012948 | Proheparin-binding EGF-like growth factor precursor | HBEGF                                                       | 1         |   |
| √* | IPI00307612 | Cadherin-20 precursor                               | CDH20                                                       | 1         |   |
| √* | IPI00025992 | Hepcidin precursor                                  | HAMP                                                        | 1         |   |
| √* | IPI00027875 | Synaptotagmin-11                                    | SYT11                                                       | 1         |   |
| √* | IPI00010442 | Phospholemman precursor                             | FXYD1;FXYD7                                                 | 1         |   |
| √  | √           | IPI00387113                                         | Ig kappa chain V-III region B6                              | -         | 1 |
| √  | √           | IPI00031411                                         | Cadherin-related tumor suppressor homolog precursor         | FAT       | 1 |
| √  | √           | IPI00738499                                         | Ferritin light chain                                        | FTL       | 1 |
| √  | √           | IPI00797310                                         | 14 kDa protein                                              | CLSTN3    | 1 |
| √  | √           | IPI00853073                                         | Protein                                                     | GPX3      | 1 |
| √  | √           | IPI00303318                                         | Protein FAM49B                                              | FAM49B    | 1 |
| √  | √           | IPI00025318                                         | SH3 domain-binding glutamic acid-rich-like protein          | SH3BGR1   | 1 |
| √  | √           | IPI00027547                                         | Dermcidin precursor                                         | DCD       | 1 |
| √  | √           | IPI00413778                                         | Peptidyl-prolyl cis-trans isomerase                         | FKBP1A    | 1 |
| √  | √           | IPI00022314                                         | Superoxide dismutase [Mn], mitochondrial precursor          | SOD2      | 1 |
| √  | √           | IPI00645194                                         | integrin beta 1 isoform 1A precursor                        | ITGB1     | 1 |
| √  | √           | IPI00013299                                         | Neuroblastoma, suppression of tumorigenicity 1              | NBL1      | 1 |
| √  | √           | IPI00743963                                         | Ig kappa chain V-I region HK101 precursor (Fragment)        | IGKC      | 1 |
| √  | √           | IPI00013933                                         | Isoform DPI of Desmoplakin                                  | DSP       | 1 |
| √  | √           | IPI00024248                                         | Sodium/iodide cotransporter                                 | SLC5A5    | 1 |
| √  | √           | IPI00028714                                         | Matrix Gla protein precursor                                | MGP       | 1 |
| √  | √           | IPI00063827                                         | Isoform 1 of Abhydrolase domain-containing protein 14B      | ABHD14B   | 1 |
| √  | √           | IPI00215899                                         | Isoform 2 of Sushi repeat-containing protein SRPX precursor | SRPX      | 1 |
| √  | √           | IPI00412264                                         | Pleiotrophin precursor                                      | PTN       | 1 |
| √  | √           | IPI00024887                                         | Bone morphogenetic protein 6 precursor                      | BMP6      | 1 |
| √  | √           | IPI00005837                                         | Angiopoietin-related protein 1 precursor                    | ANGPTL1   | 1 |
| √  | √           | IPI00024138                                         | Uncharacterized protein ENSP00000374816                     | -         | 1 |
| √  | √           | IPI00335946                                         | Family with sequence similarity 120B                        | FAM120B   | 1 |
| √  | √           | IPI00807609                                         | Aberrant LSLCL                                              | CLEC11A   | 1 |
| √  | √           | IPI00021900                                         | Tumor necrosis factor ligand superfamily member 12          | TNFSF12   | 1 |
| √  | √           | IPI00026358                                         | Gamma-aminobutyric acid receptor-associated protein-like 2  | GABARAPL2 | 1 |
| √  | √           | IPI00030877                                         | 15 kDa selenoprotein isoform 1 precursor                    | SEP15     | 1 |
| √  | √           | IPI00000265                                         | Uncharacterized protein C10orf38 precursor                  | C10orf38  | 1 |
| √  | √           | IPI00386575                                         | Ig lambda chain V-I region EPS                              | -         | 1 |
| √  | √           | IPI00000190                                         | CD81 antigen                                                | CD81      | 1 |
| √  | √           | IPI00790122                                         | 27 kDa protein                                              | TNFSF12   | 1 |
| √  | √           | IPI00026125                                         | Deoxyribonuclease I-like 1 precursor                        | DNASE1L1  | 1 |
| √  | √           | IPI00002818                                         | Isoform 1 of Kallikrein-11 precursor                        | KLK11     | 1 |
| √  | √           | IPI00296259                                         | Transmembrane emp24 domain-containing protein 4 precursor   | TMED4     | 1 |

|   |             |                                                                                        |           |   |
|---|-------------|----------------------------------------------------------------------------------------|-----------|---|
| √ | IPI00642645 | Methylenetetrahydrofolate reductase                                                    | MTHFR     | 1 |
| √ | IPI00386131 | Ig kappa chain V-III region IARC/BL41 precursor                                        | -         | 1 |
| √ | IPI00013290 | hepatoma-derived growth factor-related protein 2 isoform 1                             | HDGF2     | 1 |
| √ | IPI00154858 | Platelet endothelial aggregation receptor 1 precursor                                  | PEAR1     | 1 |
| √ | IPI00000811 | Proteasome subunit beta type-6 precursor                                               | PSMB6     | 1 |
| √ | IPI00005719 | Isoform 1 of Ras-related protein Rab-1A                                                | RAB1A     | 1 |
| √ | IPI00217264 | Isoform 3 of MAP7 domain-containing protein 3                                          | MAP7D3    | 1 |
| √ | IPI00218628 | Isoform 2 of Integrin alpha-IIb precursor                                              | ITGA2B    | 1 |
| √ | IPI00217405 | Isoform 1 of E3 ubiquitin-protein ligase UBR1                                          | UBR1      | 1 |
| √ | IPI00554521 | Ferritin heavy chain                                                                   | FTH1      | 1 |
| √ | IPI00456670 | Isoform 13 of Peroxisomal N(1)-acetyl-spermine/spermidine oxidase                      | PAOX      | 1 |
| √ | IPI00002535 | FK506-binding protein 2 precursor                                                      | FKBP2     | 1 |
| √ | IPI00006900 | Something about silencing protein 10                                                   | UTP3      | 1 |
| √ | IPI00291922 | Proteasome subunit alpha type-5                                                        | PSMA5     | 1 |
| √ | IPI00031131 | Adipocyte plasma membrane-associated protein                                           | C20orf3   | 1 |
| √ | IPI00017163 | Isoform 1 of E3 ubiquitin-protein ligase HECW2                                         | HECW2     | 1 |
| √ | IPI00026665 | Glutaminyl-tRNA synthetase                                                             | QARS      | 1 |
| √ | IPI00003406 | Isoform 1 of Drebrin                                                                   | DBN1      | 1 |
| √ | IPI00020008 | NEDD8 precursor                                                                        | NEDD8     | 1 |
| √ | IPI00387110 | Ig kappa chain V-II region MIL                                                         | -         | 1 |
| √ | IPI00376087 | putative binding protein 7a5                                                           | 7A5       | 1 |
| √ | IPI00008282 | Isoform 1 of Calcium/calmodulin-dependent 3',5'-cyclic nucleotide phosphodiesterase 1A | PDE1A     | 1 |
| √ | IPI00007277 | Isoform 1 of Leucine-rich repeat flightless-interacting protein 2                      | LRRFIP2   | 1 |
| √ | IPI00179589 | Myotrophin                                                                             | MTPN      | 1 |
| √ | IPI00216914 | Vitelline membrane outer layer protein 1 homolog precursor                             | VMO1      | 1 |
| √ | IPI00399252 | Isoform 1 of Protein Jade-1                                                            | PHF17     | 1 |
| √ | IPI00144243 | Human immunodeficiency virus type I enhancer-binding protein 2                         | HIVEP2    | 1 |
| √ | IPI00186004 | hypothetical protein LOC57730                                                          | KIAA1641  | 1 |
| √ | IPI00000070 | Low-density lipoprotein receptor precursor                                             | LDLR      | 1 |
| √ | IPI00255145 | hypothetical protein                                                                   | LOC342346 | 1 |
| √ | IPI00552874 | V1-3 protein                                                                           | IGLV2-11  | 1 |
| √ | IPI00010737 | Thrombomodulin precursor                                                               | THBD      | 1 |
| √ | IPI00168806 | Isoform 1 of Myeloid/lymphoid or mixed-lineage leukemia protein 3 homolog              | MLL3      | 1 |
| √ | IPI00302850 | Small nuclear ribonucleoprotein Sm D1                                                  | SNRPD1    | 1 |
| √ | IPI00013681 | N-terminally extended type 3 canonical transient receptor potential channel            | TRPC3     | 1 |
| √ | IPI00019208 | Similar to 60S ribosomal protein L29                                                   | -         | 1 |
| √ | IPI00025019 | Proteasome subunit beta type-1 precursor                                               | PSMB1     | 1 |
| √ | IPI00013508 | Alpha-actinin-1                                                                        | ACTN1     | 1 |
| √ | IPI00470766 | Isoform 1 of Olfactomedin-like protein 2B precursor                                    | OLFML2B   | 1 |
| √ | IPI00023359 | Isoform 1 of Malonyl CoA-acyl carrier protein transacylase, mitochondrial precursor    | MCAT      | 1 |



|   |             |                                                                                       |          |   |
|---|-------------|---------------------------------------------------------------------------------------|----------|---|
| √ | IPI00031696 | FAST kinase domain-containing protein 3                                               | FASTKD3  | 1 |
| √ | IPI00038378 | Isoform 1 of Enolase-phosphatase E1                                                   | ENOPH1   | 1 |
| √ | IPI00029819 | Neurogenic locus notch homolog protein 3 precursor                                    | NOTCH3   | 1 |
| √ | IPI00003933 | hydroxyacyl glutathione hydrolase isoform 1                                           | HAGH     | 1 |
| √ | IPI00184997 | cDNA FLJ78771, highly similar to Homo sapiens discs, large homolog 7 (Drosophila), mF | DLG7     | 1 |
| √ | IPI00004409 | Discoidin domain-containing receptor 2 precursor                                      | DDR2     | 1 |
| √ | IPI00556643 | Semaphorin 3F variant                                                                 | SEMA3F   | 1 |
| √ | IPI00000792 | Quinone oxidoreductase                                                                | CRYZ     | 1 |
| √ | IPI00218130 | Glycogen phosphorylase, muscle form                                                   | PYGM     | 1 |
| √ | IPI00292393 | Sodium channel protein type 4 subunit alpha                                           | SCN4A    | 1 |
| √ | IPI00221332 | Uncharacterized protein DN3                                                           | DNM3     | 1 |
| √ | IPI00046057 | Isoform 2 of Syntaxin-binding protein 1                                               | STXBP1   | 1 |
| √ | IPI00021364 | Properdin precursor                                                                   | CFP      | 1 |
| √ | IPI00061507 | Isoform 3 of Ester hydrolase C11orf54                                                 | C11orf54 | 1 |
| √ | IPI00382499 | Ig heavy chain V-III region JON                                                       | -        | 1 |
| √ | IPI00386754 | Isoform 2 of Cysteine-rich with EGF-like domain protein 2 precursor                   | CRELD2   | 1 |
| √ | IPI00737969 | microtubule associated monooxygenase, calponin and LIM domain containing 3            | MICAL3   | 1 |
| √ | IPI00442121 | delta-aminolevulinic acid dehydratase isoform a                                       | ALAD     | 1 |
| √ | IPI00186826 | Ephrin receptor                                                                       | EPHB4    | 1 |
| √ | IPI00013219 | Integrin-linked protein kinase                                                        | ILK      | 1 |
| √ | IPI00010207 | Ubiquitin-fold modifier 1 precursor                                                   | UFM1     | 1 |
| √ | IPI00737429 | Teneurin-4                                                                            | ODZ4     | 1 |
| √ | IPI00004480 | ADAM DEC1 precursor                                                                   | ADAMDEC1 | 1 |
| √ | IPI00412216 | vacuolar protein sorting 13C protein isoform 2B                                       | VPS13C   | 1 |
| √ | IPI00005969 | F-actin-capping protein subunit alpha-1                                               | CAPZA1   | 1 |
| √ | IPI00060308 | Isoform 6 of PDZ and LIM domain protein 7                                             | PDLIM7   | 1 |
| √ | IPI00387101 | Ig kappa chain V-I region Scw                                                         | -        | 1 |
| √ | IPI00218075 | Protein FAM9B                                                                         | FAM9B    | 1 |
| √ | IPI00002790 | Isoform 1 of Protein sel-1 homolog 1 precursor                                        | SEL1L    | 1 |
| √ | IPI00221034 | Transcription factor RelB                                                             | RELB     | 1 |
| √ | IPI00019372 | Serglycin precursor                                                                   | SRGN     | 1 |
| √ | IPI00215979 | Bisphosphoglycerate mutase                                                            | BPGM     | 1 |
| √ | IPI00216963 | Isoform 9 of CASP8 and FADD-like apoptosis regulator precursor                        | CFLAR    | 1 |
| √ | IPI00248596 | similar to slit homolog 1                                                             | ELFN1    | 1 |
| √ | IPI00012391 | Isoform Long of Adenomatous polyposis coli protein                                    | APC      | 1 |
| √ | IPI00296337 | Isoform 1 of DNA-dependent protein kinase catalytic subunit                           | PRKDC    | 1 |
| √ | IPI00299147 | Small ubiquitin-related modifier 3 precursor                                          | SUMO3    | 1 |
| √ | IPI00435925 | PP14214                                                                               | IGFBP3   | 1 |
| √ | IPI00008274 | Adenylyl cyclase-associated protein 1                                                 | CAP1     | 1 |
| √ | IPI00410588 | ADAMTS-like protein 3 precursor                                                       | ADAMTSL3 | 1 |

|   |             |                                                                                      |           |   |
|---|-------------|--------------------------------------------------------------------------------------|-----------|---|
| √ | IPI00004534 | Phosphoribosylformylglycinamide synthase                                             | PFAS      | 1 |
| √ | IPI00554474 | Hypothetical LOC284297                                                               | LOC284297 | 1 |
| √ | IPI00479669 | Isoform 1 of Uncharacterized protein KIAA0701                                        | UHRF1BP1L | 1 |
| √ | IPI00017940 | LMBR1 domain-containing protein 2                                                    | LMBRD2    | 1 |
| √ | IPI00400986 | hypothetical protein LOC85459                                                        | KIAA1731  | 1 |
| √ | IPI00011643 | Isoform 2 of Kunitz-type protease inhibitor 1 precursor                              | SPINT1    | 1 |
| √ | IPI00748955 | platelet glycoprotein Ib alpha polypeptide precursor                                 | GP1BA     | 1 |
| √ | IPI00217781 | Similar to expressed sequence AI593442                                               | LOC399947 | 1 |
| √ | IPI00031008 | Isoform 1 of Tenascin precursor                                                      | TNC       | 1 |
| √ | IPI00103552 | Mucin-16                                                                             | MUC16     | 1 |
| √ | IPI00443909 | Isoform 1 of Protein canopy homolog 2 precursor                                      | CNPY2     | 1 |
| √ | IPI00024853 | Isoform 1 of Periaxin                                                                | PRX       | 1 |
| √ | IPI00101927 | Leucine zipper putative tumor suppressor 2                                           | LZTS2     | 1 |
| √ | IPI00470838 | Isoform 1 of DENN domain-containing protein 2C                                       | DENND2C   | 1 |
| √ | IPI00008580 | Antileukoproteinase precursor                                                        | SLPI      | 1 |
| √ | IPI00025869 | Alpha-galactosidase A precursor                                                      | GLA       | 1 |
| √ | IPI00005531 | Isoform 1 of Probable DNA dC->dU-editing enzyme APOBEC-3B                            | APOBEC3B  | 1 |
| √ | IPI00783313 | Glycogen phosphorylase, liver form                                                   | PYGL      | 1 |
| √ | IPI00009335 | Brain protein 16                                                                     | C8orf30A  | 1 |
| √ | IPI00387095 | Ig kappa chain V-I region Ka                                                         | -         | 1 |
| √ | IPI00013860 | 3-hydroxyisobutyrate dehydrogenase, mitochondrial precursor                          | HIBADH    | 1 |
| √ | IPI00377045 | Alpha3A                                                                              | LAMA3     | 1 |
| √ | IPI00008433 | 40S ribosomal protein S5                                                             | RPS5      | 1 |
| √ | IPI00219525 | 6-phosphogluconate dehydrogenase, decarboxylating                                    | PGD       | 1 |
| √ | IPI00020501 | Myosin-11                                                                            | MYH11     | 1 |
| √ | IPI00442865 | CDNA FLJ26488 fis, clone KDN05770, highly similar to Bumetanide- sensitive sodium-(p | SLC12A1   | 1 |
| √ | IPI00414320 | Annexin A11                                                                          | ANXA11    | 1 |
| √ | IPI00827584 | similar to kinesin family member 27                                                  | KIF27     | 1 |
| √ | IPI00295618 | Isoform Long of Platelet endothelial cell adhesion molecule precursor                | PECAM1    | 1 |
| √ | IPI00010133 | Coronin-1A                                                                           | CORO1A    | 1 |
| √ | IPI00013991 | Isoform 1 of Tropomyosin beta chain                                                  | TPM2      | 1 |
| √ | IPI00005705 | Isoform Gamma-1 of Serine/threonine-protein phosphatase PP1-gamma catalytic subunit  | PPP1CC    | 1 |
| √ | IPI00303882 | Isoform B of Mannose-6-phosphate receptor-binding protein 1                          | M6PRBP1   | 1 |
| √ | IPI00154528 | Isoform 1 of Structural maintenance of chromosomes protein 6                         | SMC6      | 1 |
| √ | IPI00216049 | Isoform 1 of Heterogeneous nuclear ribonucleoprotein K                               | HNRPK     | 1 |
| √ | IPI00003111 | Ig kappa chain V-I region AU                                                         | LOC652694 | 1 |
| √ | IPI00003031 | Isoform 2 of Isochorismatase domain-containing protein 2, mitochondrial precursor    | ISOC2     | 1 |
| √ | IPI00009532 | 4-aminobutyrate aminotransferase, mitochondrial precursor                            | ABAT      | 1 |
| √ | IPI00643937 | Methylenetetrahydrofolate dehydrogenase (NADP+ dependent) 1-like                     | MTHFD1L   | 1 |
| √ | IPI00030876 | diaphanous 1 isoform 2                                                               | DIAPH1    | 1 |

|   |             |                                                                                         |           |   |
|---|-------------|-----------------------------------------------------------------------------------------|-----------|---|
| √ | IPI00031627 | DNA-directed RNA polymerase II subunit RPB1                                             | POLR2A    | 1 |
| √ | IPI00737920 | similar to dynein, axonemal, heavy polypeptide 1                                        | DNAH3     | 1 |
| √ | IPI00218914 | Retinal dehydrogenase 1                                                                 | ALDH1A1   | 1 |
| √ | IPI00456578 | LOC441054 protein                                                                       | LOC441054 | 1 |
| √ | IPI00013302 | ADAM 15 precursor                                                                       | ADAM15    | 1 |
| √ | IPI00333197 | Isoform 2 of GRIP and coiled-coil domain-containing protein 2                           | GCC2      | 1 |
| √ | IPI00004346 | C-C chemokine receptor type 10                                                          | CCR10     | 1 |
| √ | IPI00218131 | Protein S100-A12                                                                        | S100A12   | 1 |
| √ | IPI00440153 | 68 kDa protein                                                                          | XRRA1     | 1 |
| √ | IPI00014516 | Isoform 1 of Caldesmon                                                                  | CALD1     | 1 |
| √ | IPI00297208 | similar to Myosin-10                                                                    | KIAA1276  | 1 |
| √ | IPI00025084 | Calpain small subunit 1                                                                 | CAPNS1    | 1 |
| √ | IPI00014899 | CDNA FLJ20744 fis, clone HEP06585                                                       | BRPF3     | 1 |
| √ | IPI00218398 | Matrix metalloproteinase-14 precursor                                                   | MMP14     | 1 |
| √ | IPI00013978 | Speckle-type POZ protein                                                                | SPOP      | 1 |
| √ | IPI00014398 | Four and a half LIM domains 1 variant                                                   | FHL1      | 1 |
| √ | IPI00874156 | Isoform 1 of Ubiquitin thioesterase OTUB1                                               | OTUB1     | 1 |
| √ | IPI00004373 | Mannose-binding protein C precursor                                                     | MBL2      | 1 |
| √ | IPI00827522 | Anti-streptococcal/anti-myosin immunoglobulin lambda light chain variable region (Fragm | IGLV1-44  | 1 |
| √ | IPI00007010 | Lysozyme-like protein 6 precursor                                                       | LYZL6     | 1 |
| √ | IPI00002412 | Palmitoyl-protein thioesterase 1 precursor                                              | PPT1      | 1 |
| √ | IPI00299778 | Serum paraoxonase/lactonase 3                                                           | PON3      | 1 |
| √ | IPI00451429 | NIF3L1 isoform gamma                                                                    | NIF3L1    | 1 |
| √ | IPI00218407 | Fructose-bisphosphate aldolase B                                                        | ALDOB     | 1 |
| √ | IPI00010369 | Testis-expressed sequence 15 protein                                                    | TEX15     | 1 |
| √ | IPI00219005 | FK506-binding protein 4                                                                 | FKBP4     | 1 |
| √ | IPI00013004 | Isoform 1 of Pyridoxal kinase                                                           | PDXK      | 1 |
| √ | IPI00289334 | Isoform 1 of Filamin-B                                                                  | FLNB      | 1 |
| √ | IPI00021907 | Isoform 1 of Myelin basic protein                                                       | MBP       | 1 |
| √ | IPI00008303 | Isoform 1 of N-acetylglucosamine-1-phosphodiester alpha-N-acetylglucosaminidase prec    | NAGPA     | 1 |
| √ | IPI00064935 | Alpha-protein kinase 3                                                                  | ALPK3     | 1 |
| √ | IPI00300407 | Syndecan-2 precursor                                                                    | SDC2      | 1 |
| √ | IPI00061448 | 13 kDa protein                                                                          | -         | 1 |
| √ | IPI00550364 | Phosphoglucomutase-2                                                                    | PGM2      | 1 |
| √ | IPI00028450 | Isoform 1 of Sodium/calcium exchanger 1 precursor                                       | SLC8A1    | 1 |
| √ | IPI00218465 | Phospholipase A-2-activating protein                                                    | PLAA      | 1 |
| √ | IPI00217740 | C20orf12 protein                                                                        | C20orf12  | 1 |
| √ | IPI00872550 | Uncharacterized protein PRDM2                                                           | PRDM2     | 1 |
| √ | IPI00382421 | Ig lambda chain V-I region NEW                                                          | -         | 1 |
| √ | IPI00289861 | Isoform 1 of Zinc finger CCHC domain-containing protein 11                              | ZCCHC11   | 1 |

|   |             |                                                                                  |          |   |
|---|-------------|----------------------------------------------------------------------------------|----------|---|
| √ | IPI00855918 | mucin 5, subtype B, tracheobronchial                                             | MUC5B    | 1 |
| √ | IPI00032313 | Protein S100-A4                                                                  | S100A4   | 1 |
| √ | IPI00027626 | T-complex protein 1 subunit zeta                                                 | CCT6A    | 1 |
| √ | IPI00001960 | Chloride intracellular channel protein 4                                         | CLIC4    | 1 |
| √ | IPI00027009 | Isoform 1 of Protein kinase C and casein kinase substrate in neurons protein 2   | PACSIN2  | 1 |
| √ | IPI00005132 | Guanine nucleotide-binding protein-like 3-like protein                           | GNL3L    | 1 |
| √ | IPI00215746 | Fatty acid-binding protein, adipocyte                                            | FABP4    | 1 |
| √ | IPI00216780 | Cartilage intermediate layer protein 2 precursor                                 | CILP2    | 1 |
| √ | IPI00385918 | CDNA FLJ90582 fis, clone PLACE1000442, moderately similar to ZINC FINGER PROTEIN | ZNF627   | 1 |
| √ | IPI00218820 | Isoform 3 of Tropomyosin beta chain                                              | TPM2     | 1 |
| √ | IPI00383603 | Anti-thyroglobulin light chain variable region (Fragment)                        | -        | 1 |
| √ | IPI00219622 | Proteasome subunit alpha type-2                                                  | PSMA2    | 1 |
| √ | IPI00031086 | Insulin-like growth factor-binding protein 1 precursor                           | IGFBP1   | 1 |
| √ | IPI00022462 | Transferrin receptor protein 1                                                   | TFRC     | 1 |
| √ | IPI00016112 | peroxidasin homolog                                                              | PXDN     | 1 |
| √ | IPI00010193 | Isoform 1 of Interferon-alpha/beta receptor beta chain precursor                 | IFNAR2   | 1 |
| √ | IPI00021048 | Isoform 1 of Myoferlin                                                           | FER1L3   | 1 |
| √ | IPI00149375 | Isoform 2 of Uncharacterized protein C11orf56                                    | C11orf56 | 1 |
| √ | IPI00015913 | 5,6-dihydroxyindole-2-carboxylic acid oxidase precursor                          | TYRP1    | 1 |
| √ | IPI00383016 | Immunglobulin light chain variable region (Fragment)                             | -        | 1 |
| √ | IPI00382486 | Ig heavy chain V-III region NIE                                                  | -        | 1 |
| √ | IPI00004533 | Kinesin-like protein KIF3B                                                       | KIF3B    | 1 |
| √ | IPI00020019 | Adiponectin precursor                                                            | ADIPOQ   | 1 |
| √ | IPI00026241 | Bone marrow stromal antigen 2 precursor                                          | BST2     | 1 |
| √ | IPI00010863 | Copper transport protein ATOX1                                                   | ATOX1    | 1 |
| √ | IPI00218918 | Annexin A1                                                                       | ANXA1    | 1 |
| √ | IPI00295577 | Receptor-type tyrosine-protein phosphatase beta precursor                        | PTPRB    | 1 |
| √ | IPI00029372 | Uncharacterized protein C4orf15                                                  | C4orf15  | 1 |
| √ | IPI00220271 | Alcohol dehydrogenase                                                            | AKR1A1   | 1 |
| √ | IPI00306853 | Carbohydrate sulfotransferase 3                                                  | CHST3    | 1 |
| √ | IPI00019530 | Tyrosine-protein kinase receptor Tie-1 precursor                                 | TIE1     | 1 |
| √ | IPI00456683 | Isoform 3 of Transcription elongation factor SPT6                                | SUPT6H   | 1 |
| √ | IPI00005614 | Isoform Long of Spectrin beta chain, brain 1                                     | SPTBN1   | 1 |
| √ | IPI00021831 | cAMP-dependent protein kinase type I-alpha regulatory subunit                    | PRKAR1A  | 1 |
| √ | IPI00007682 | Vacuolar ATP synthase catalytic subunit A                                        | ATP6V1A  | 1 |
| √ | IPI00024502 | Ubiquilin-4                                                                      | UBQLN4   | 1 |
| √ | IPI00298738 | DNA-directed RNA polymerase, mitochondrial precursor                             | POLRMT   | 1 |
| √ | IPI00335541 | Isoform 1 of Protein timeless homolog                                            | TIMELESS | 1 |
| √ | IPI00444331 | Isoform 4 of Histone-lysine N-methyltransferase NSD3                             | WHSC1L1  | 1 |
| √ | IPI00028600 | Isoform 1 of Kallikrein-7 precursor                                              | KLK7     | 1 |

|   |             |                                                                        |           |   |
|---|-------------|------------------------------------------------------------------------|-----------|---|
| √ | IPI00456635 | Isoform 1 of Protein unc-13 homolog D                                  | UNC13D    | 1 |
| √ | IPI00221178 | Isoform 2 of Tumor protein D54                                         | TPD52L2   | 1 |
| √ | IPI00000977 | Mitogen-activated protein kinase kinase kinase 11                      | MAP3K11   | 1 |
| √ | IPI00290854 | A-kinase anchor protein 3                                              | AKAP3     | 1 |
| √ | IPI00301058 | Vasodilator-stimulated phosphoprotein                                  | VASP      | 1 |
| √ | IPI00853516 | dynein, axonemal, heavy chain 17                                       | DNAH17    | 1 |
| √ | IPI00384051 | Uncharacterized protein PSME2                                          | PSME2     | 1 |
| √ | IPI00006146 | serum amyloid A2                                                       | SAA1;SAA2 | 1 |
| √ | IPI00150881 | Isoform 1 of Coiled-coil domain-containing protein C6orf204            | C6orf204  | 1 |
| √ | IPI00024346 | snRNA-activating protein complex subunit 3                             | SNAPC3    | 1 |
| √ | IPI00296913 | ADP-sugar pyrophosphatase                                              | NUDT5     | 1 |
| √ | IPI00018342 | Adenylate kinase isoenzyme 1                                           | AK1       | 1 |
| √ | IPI00166075 | Leucine-rich repeat LGI family member 3 precursor                      | LGI3      | 1 |
| √ | IPI00029107 | Werner syndrome ATP-dependent helicase                                 | WRN       | 1 |
| √ | IPI00867509 | Coronin-1C_i3 protein                                                  | CORO1C    | 1 |
| √ | IPI00217871 | Delta-1-pyrroline-5-carboxylate dehydrogenase, mitochondrial precursor | ALDH4A1   | 1 |
| √ | IPI00552771 | V2-11 protein                                                          | IGLV3-16  | 1 |
| √ | IPI00410488 | Isoform 1 of CD276 antigen precursor                                   | CD276     | 1 |
| √ | IPI00382474 | Ig heavy chain V-III region TRO                                        | -         | 1 |
| √ | IPI00215610 | 55 kDa erythrocyte membrane protein                                    | MPP1      | 1 |
| √ | IPI00015148 | Ras-related protein Rap-1b precursor                                   | RAP1B     | 1 |
| √ | IPI00020431 | Isoform 1 of TGF-beta receptor type-2 precursor                        | TGFBR2    | 1 |
| √ | IPI00410657 | Isoform 2 of mRNA cap guanine-N7 methyltransferase                     | RNMT      | 1 |
| √ | IPI00552591 | V1-20 protein                                                          | IGLV10-54 | 1 |
| √ | IPI00335168 | Isoform Non-muscle of Myosin light polypeptide 6                       | MYL6      | 1 |
| √ | IPI00002491 | Isoform 9 of Sorbin and SH3 domain-containing protein 1                | SORBS1    | 1 |
| √ | IPI00005159 | Actin-related protein 2                                                | ACTR2     | 1 |
| √ | IPI00647217 | Superkiller viralicidic activity 2-like 2                              | SKIV2L2   | 1 |
| √ | IPI00017529 | Isoform 1 of Lymphocyte function-associated antigen 3 precursor        | CD58      | 1 |
| √ | IPI00024664 | Isoform Long of Ubiquitin carboxyl-terminal hydrolase 5                | USP5      | 1 |
| √ | IPI00004798 | cDNA FLJ75207                                                          | CRISP3    | 1 |
| √ | IPI00012877 | Isoform 1 of Interferon-alpha/beta receptor alpha chain precursor      | IFNAR1    | 1 |
| √ | IPI00478816 | Serine protease inhibitor Kazal-type 5 precursor                       | SPINK5    | 1 |
| √ | IPI00017256 | Ras suppressor protein 1                                               | RSU1      | 1 |
| √ | IPI00023217 | Isoform 1 of Ryanodine receptor 2                                      | RYR2      | 1 |
| √ | IPI00477616 | Protein phosphatase 2A activator, regulatory subunit 4                 | PPP2R4    | 1 |
| √ | IPI00479722 | Proteasome activator complex subunit 1                                 | PSME1     | 1 |
| √ | IPI00006470 | Neuron-specific protein family member 2                                | HMP19     | 1 |
| √ | IPI00021753 | Kinesin-like protein KIF13B                                            | KIF13B    | 1 |
| √ | IPI00027984 | Putative uncharacterized protein                                       | DNAJC11   | 1 |

|   |             |                                                                                |          |   |
|---|-------------|--------------------------------------------------------------------------------|----------|---|
| √ | IPI00221255 | Isoform 2 of Myosin light chain kinase, smooth muscle                          | MYLK     | 1 |
| √ | IPI00300207 | Isoform 1 of Uncharacterized protein FLJ44066                                  | LOC91431 | 1 |
| √ | IPI00171678 | Dopamine beta-hydroxylase                                                      | DBH      | 1 |
| √ | IPI00018909 | trefoil factor 3 precursor                                                     | TFF3     | 1 |
| √ | IPI00163851 | Isoform 1 of Eukaryotic translation initiation factor 2-alpha kinase 4         | EIF2AK4  | 1 |
| √ | IPI00014340 | Isoform 1 of Protein phosphatase 1 regulatory subunit 12C                      | PPP1R12C | 1 |
| √ | IPI00297550 | Coagulation factor XIII A chain precursor                                      | F13A1    | 1 |
| √ | IPI00299263 | ADP-ribosylation factor GTPase-activating protein 3                            | ARFGAP3  | 1 |
| √ | IPI00014537 | Isoform 1 of Calumenin precursor                                               | CALU     | 1 |
| √ | IPI00243995 | Serine/threonine-protein kinase Nek5                                           | NEK5     | 1 |
| √ | IPI00171196 | keratin 13 isoform b                                                           | KRT13    | 1 |
| √ | IPI00021327 | Isoform 1 of Growth factor receptor-bound protein 2                            | GRB2     | 1 |
| √ | IPI00023505 | Low affinity immunoglobulin gamma Fc region receptor II-a precursor            | FCGR2A   | 1 |
| √ | IPI00015988 | HLA class I histocompatibility antigen, alpha chain G precursor                | HLA-G    | 1 |
| √ | IPI00021812 | Neuroblast differentiation-associated protein AHNAK                            | AHNAK    | 1 |
| √ | IPI00219077 | Isoform 1 of Leukotriene A-4 hydrolase                                         | LTA4H    | 1 |
| √ | IPI00004084 | Isoform 2 of Cyclic AMP-dependent transcription factor ATF-6 beta              | CREBL1   | 1 |
| √ | IPI00642259 | Dystonin                                                                       | DST      | 1 |
| √ | IPI00789398 | Isoform 3 of Lymphocyte antigen 75 precursor                                   | LY75     | 1 |
| √ | IPI00032826 | Hsc70-interacting protein                                                      | ST13     | 1 |
| √ | IPI00152326 | glutathione S-transferase M1 isoform 2                                         | GSTM1    | 1 |
| √ | IPI00044751 | Isoform 1 of M-phase phosphoprotein 1                                          | MPHOSPH1 | 1 |
| √ | IPI00009943 | Tumor protein, translationally-controlled 1                                    | TPT1     | 1 |
| √ | IPI00166807 | Isoform 3 of Oxidation resistance protein 1                                    | OXR1     | 1 |
| √ | IPI00032187 | nischarin                                                                      | NISCH    | 1 |
| √ | IPI00420014 | Isoform 1 of U5 small nuclear ribonucleoprotein 200 kDa helicase               | ASCC3L1  | 1 |
| √ | IPI00386314 | FLJ00064 protein (Fragment)                                                    | CNDP2    | 1 |
| √ | IPI00024107 | Isoform 1 of Alpha-synuclein                                                   | SNCA     | 1 |
| √ | IPI00160369 | PRKCA-binding protein                                                          | PICK1    | 1 |
| √ | IPI00002478 | Isoform B of Endothelin-converting enzyme 1                                    | ECE1     | 1 |
| √ | IPI00027438 | Flotillin-1                                                                    | FLOT1    | 1 |
| √ | IPI00033030 | Protein ADRM1                                                                  | ADRM1    | 1 |
| √ | IPI00017964 | Small nuclear ribonucleoprotein Sm D3                                          | SNRPD3   | 1 |
| √ | IPI00163724 | Potassium/sodium hyperpolarization-activated cyclic nucleotide-gated channel 3 | HCN3     | 1 |
| √ | IPI00478640 | Isoform 1 of Transmembrane protein C17orf87                                    | C17orf87 | 1 |
| √ | IPI00383953 | VH4 heavy chain variable region precursor (Fragment)                           | -        | 1 |
| √ | IPI00011051 | T-cell leukemia homeobox protein 1                                             | TLX1     | 1 |
| √ | IPI00830051 | Similar to Immunoglobulin heavy chain                                          | LOC90925 | 1 |
| √ | IPI00550720 | Isoform 1 of Uncharacterized protein C19orf57                                  | C19orf57 | 1 |
| √ | IPI00103510 | Relaxin receptor 2                                                             | RXFP2    | 1 |

|             |                                                                                             |           |   |
|-------------|---------------------------------------------------------------------------------------------|-----------|---|
| IPI00373872 | polycystin 1-like 2 isoform a                                                               | PKD1L2    | 1 |
| IPI00295172 | Ninjurin-1                                                                                  | NINJ1     | 1 |
| IPI00328522 | KTEL motif-containing protein 1                                                             | KTELC1    | 1 |
| IPI00251596 | Isoform 1 of Collagen alpha-1(XXIII) chain                                                  | COL23A1   | 1 |
| IPI00550906 | Cleavage stimulation factor 64 kDa subunit, tau variant                                     | CSTF2T    | 1 |
| IPI00550263 | Isoform 5 of Serine/threonine-protein kinase MRCK alpha                                     | CDC42BPA  | 1 |
| IPI00045219 | Sorting nexin-18                                                                            | SNAG1     | 1 |
| IPI00179473 | Isoform 1 of Sequestosome-1                                                                 | SQSTM1    | 1 |
| IPI00221235 | nucleoporin 160kDa                                                                          | NUP160    | 1 |
| IPI00167560 | PAP-associated domain-containing protein 4                                                  | PAPD4     | 1 |
| IPI00098902 | 2-oxoglutarate dehydrogenase E1 component, mitochondrial precursor                          | OGDH      | 1 |
| IPI00000959 | Isoform 1 of VIP peptides precursor                                                         | VIP       | 1 |
| IPI00289271 | Liprin-alpha-2                                                                              | PPFIA2    | 1 |
| IPI00216470 | Isoform 1 of Phosphatidylinositol-5-phosphate 4-kinase type-2 beta                          | PIP4K2B   | 1 |
| IPI00879575 | 71 kDa protein                                                                              | -         | 1 |
| IPI00744825 | Conserved hypothetical protein                                                              | -         | 1 |
| IPI00005675 | NF-kappa-B-repressing factor                                                                | NKRF      | 1 |
| IPI00217989 | Isoform 1 of Protein-associating with the carboxyl-terminal domain of ezrin                 | SCYL3     | 1 |
| IPI00829836 | Uncharacterized protein ENSP00000374797                                                     | -         | 1 |
| IPI00185661 | Ubiquitin carboxyl-terminal hydrolase 32                                                    | USP32     | 1 |
| IPI00217258 | CCDC100 protein                                                                             | CCDC100   | 1 |
| IPI00307729 | ADAMTS-3 precursor                                                                          | ADAMTS3   | 1 |
| IPI00604430 | Isoform 2 of Receptor expression-enhancing protein 2                                        | REEP2     | 1 |
| IPI00186621 | Orofacial clefting chromosomal breakpoint region 1                                          | OFCC1     | 1 |
| IPI00295098 | Signal recognition particle receptor subunit beta                                           | SRPRB     | 1 |
| IPI00071824 | Isoform 1 of Cytoskeleton-associated protein 2                                              | CKAP2     | 1 |
| IPI00747494 | Glutamate receptor delta-2 subunit precursor                                                | GRID2     | 1 |
| IPI00302962 | Amphiphysin I variant CT4 (Fragment)                                                        | AMPH      | 1 |
| IPI00879409 | 28 kDa protein                                                                              | -         | 1 |
| IPI00005153 | Isoform Aa of Odorant-binding protein 2a precursor                                          | OBP2A     | 1 |
| IPI00169259 | Small VCP/p97-interacting protein                                                           | SVIP      | 1 |
| IPI00106506 | Isoform 1 of Evolutionarily conserved signaling intermediate in Toll pathway, mitochondrial | ECSIT     | 1 |
| IPI00472332 | similar to polyhomeotic 1-like isoform 4                                                    | LOC653441 | 1 |
| IPI00789245 | Isoform 2 of Probable organic cation transporter protein C6orf85                            | SLC22A23  | 1 |
| IPI00012044 | Isoform 1 of Pro-neuregulin-3, membrane-bound isoform precursor                             | NRG3      | 1 |
| IPI00290744 | Fibronectin type-III domain-containing protein C5orf40                                      | C5orf40   | 1 |
| IPI00152145 | Protein odd-skipped-related 1                                                               | OSR1      | 1 |
| IPI00021770 | Isoform 1 of 3-hydroxy-3-methylglutaryl-coenzyme A reductase                                | HMGCR     | 1 |
| IPI00465045 | DIP2 disco-interacting protein 2 homolog B                                                  | DIP2B     | 1 |
| IPI00018803 | homeobox D12                                                                                | HOXD12    | 1 |

|             |                                                                                  |               |   |
|-------------|----------------------------------------------------------------------------------|---------------|---|
| IPI00828083 | Heavy chain Fab (Fragment)                                                       | -             | 1 |
| IPI00827580 | Immunoglobulin kappa, VJ region (Fragment)                                       | -             | 1 |
| IPI00021594 | Isoform 1 of Glycosylphosphatidylinositol anchor attachment 1 protein            | GPAA1         | 1 |
| IPI00010360 | Isoform 1 of Collagen alpha-3(IV) chain precursor                                | COL4A3        | 1 |
| IPI00028381 | Isoform 1 of Delta-like protein 2 precursor                                      | DLK2          | 1 |
| IPI00465044 | Protein RCC2                                                                     | RCC2          | 1 |
| IPI00013847 | Cytochrome b-c1 complex subunit 1, mitochondrial precursor                       | UQCRC1        | 1 |
| IPI00180386 | Isoform GN-1L of Glycogenin-1                                                    | GYG1          | 1 |
| IPI00001793 | Beta-1,3-N-acetylglucosaminyltransferase radical fringe                          | RFNG          | 1 |
| IPI00167638 | Isoform 1 of GTP-binding protein 10                                              | GTPBP10       | 1 |
| IPI00827891 | Cold agglutinin FS-2 H-chain (Fragment)                                          | -             | 1 |
| IPI00218292 | Isoform Short of Ubiquitin fusion degradation protein 1 homolog                  | UFD1L         | 1 |
| IPI00384861 | Isoform 1 of ARF GTPase-activating protein GIT1                                  | GIT1          | 1 |
| IPI00018980 | Sodium channel subunit beta-1 precursor                                          | SCN1B         | 1 |
| IPI00830044 | Uncharacterized protein ENSP00000374806                                          | -             | 1 |
| IPI00024012 | Frizzled-7 precursor                                                             | FZD7          | 1 |
| IPI00478860 | Glycoprotein endo-alpha-1,2-mannosidase                                          | MANEA         | 1 |
| IPI00552735 | V2-8 protein                                                                     | IGLV3-12      | 1 |
| IPI00000104 | Isoform 1 of mRNA-capping enzyme                                                 | RNGTT         | 1 |
| IPI00296219 | Glutaminase liver isoform, mitochondrial precursor                               | GLS2          | 1 |
| IPI00005564 | Stanniocalcin-1 precursor                                                        | STC1          | 1 |
| IPI00014850 | Astrocytic phosphoprotein PEA-15                                                 | PEA15         | 1 |
| IPI00794679 | Major histocompatibility complex, class I, B                                     | MICA;HLA-B;HI | 1 |
| IPI00294519 | Isoform 1 of Telomerase protein component 1                                      | TEP1          | 1 |
| IPI00744811 | Low-density lipoprotein receptor-related protein 5 precursor                     | LRP5          | 1 |
| IPI00031485 | Mitochondrial ribosomal protein 63                                               | MRP63         | 1 |
| IPI00784044 | Isoform 1 of Methylcrotonoyl-CoA carboxylase beta chain, mitochondrial precursor | MCCC2         | 1 |
| IPI00514893 | Disheveled-associated activator of morphogenesis 2                               | DAAM2         | 1 |
| IPI00429191 | Eukaryotic peptide chain release factor subunit 1                                | ETF1          | 1 |
| IPI00514594 | Isoform 1 of Protein FAM5B precursor                                             | FAM5B         | 1 |
| IPI00853376 | additional sex combs like 3                                                      | ASXL3         | 1 |
| IPI00400967 | KIAA1843 protein (Fragment)                                                      | KIAA1843      | 1 |
| IPI00166010 | Isoform 1 of CCR4-NOT transcription complex subunit 1                            | CNOT1         | 1 |
| IPI00793576 | 7 kDa protein                                                                    | PRH2;PRB4;PF  | 1 |
| IPI00301631 | Isoform 1 of Torsin-3A precursor                                                 | TOR3A         | 1 |
| IPI00396077 | Isoform 1 of E3 ubiquitin-protein ligase Topors                                  | TOPORS        | 1 |
| IPI00465178 | Isoform 1 of Vacuolar proton translocating ATPase 116 kDa subunit a isoform 1    | ATP6V0A1      | 1 |
| IPI00291463 | Radical S-adenosyl methionine domain-containing protein 2                        | RSAD2         | 1 |
| IPI00007040 | Zinc finger protein 222                                                          | ZNF222        | 1 |
| IPI00220578 | Guanine nucleotide-binding protein G                                             | GNAI3         | 1 |



|             |                                                                       |           |   |
|-------------|-----------------------------------------------------------------------|-----------|---|
| IPI00740191 | similar to Forkhead box protein L1                                    | LOC651986 | 1 |
| IPI00044607 | Protein phosphatase inhibitor 2-like protein 1                        | PPP1R2P1  | 1 |
| IPI00301923 | Isoform 1 of Cell division protein kinase 9                           | CDK9      | 1 |
| IPI00059395 | Kinesin-like protein KIFC2                                            | KIFC2     | 1 |
| IPI00030319 | Forkhead box protein F2                                               | FOXF2     | 1 |
| IPI00018275 | Prion-like protein doppel precursor                                   | PRND      | 1 |
| IPI00025363 | Isoform 1 of Glial fibrillary acidic protein                          | GFAP      | 1 |
| IPI00015285 | Ethanolamine-phosphate cytidyltransferase                             | PCYT2     | 1 |
| IPI00554799 | shadow of prion protein                                               | SPRN      | 1 |
| IPI00478124 | 61 kDa protein                                                        | UCKL1     | 1 |
| IPI00304596 | Non-POU domain-containing octamer-binding protein                     | NONO      | 1 |
| IPI00012895 | Isoform 1 of Carbonic anhydrase 12 precursor                          | CA12      | 1 |
| IPI00299627 | Dual oxidase 2 precursor                                              | DUOX2     | 1 |
| IPI00023513 | Isoform 1 of E3 ubiquitin-protein ligase CHFR                         | CHFR      | 1 |
| IPI00394870 | Brorin precursor                                                      | VWC2      | 1 |
| IPI00166817 | Zinc finger protein 561                                               | ZNF561    | 1 |
| IPI00375174 | Ankyrin repeat and sterile alpha motif domain-containing protein 1B   | ANKS1B    | 1 |
| IPI00296866 | interphotoreceptor matrix proteoglycan 2                              | IMPG2     | 1 |
| IPI00040730 | protocadherin 21 precursor                                            | PCDH21    | 1 |
| IPI00829980 | Myosin-reactive immunoglobulin light chain variable region (Fragment) | -         | 1 |
| IPI00028561 | Kinesin heavy chain isoform 5C                                        | KIF5C     | 1 |
| IPI00743898 | Uncharacterized protein ENSP00000357890 (Fragment)                    | -         | 1 |
| IPI00644231 | Isoform 1 of Cytoplasmic FMR1-interacting protein 1                   | CYFIP1    | 1 |
| IPI00007193 | Isoform 2 of Ankyrin repeat domain-containing protein 26              | ANKRD26   | 1 |
| IPI00306959 | Keratin, type II cytoskeletal 7                                       | KRT7      | 1 |
| IPI00816737 | Rheumatoid factor D5 heavy chain (Fragment)                           | -         | 1 |
| IPI00013466 | Arsenical pump-driving ATPase                                         | ASNA1     | 1 |
| IPI00016605 | Uncharacterized protein C1orf123                                      | C1orf123  | 1 |
| IPI00872861 | PTD016 protein                                                        | LOC51136  | 1 |
| IPI00298285 | Isoform 1 of Receptor tyrosine-protein kinase erbB-3 precursor        | ERBB3     | 1 |
| IPI00166619 | Isoform 2 of Putative transporter SVOPL                               | SVOPL     | 1 |
| IPI00029722 | Kinesin heavy chain isoform 5A                                        | KIF5A     | 1 |
| IPI00005128 | Isoform 1 of Angiopoietin-2 precursor                                 | ANGPT2    | 1 |
| IPI00796647 | HIG1 domain family, member 1C                                         | HIGD1C    | 1 |
| IPI00852758 | Similar to Ankyrin repeat domain-containing protein 26. Isoform 2     | ANKRD18B  | 1 |
| IPI00023087 | Ubiquitin-conjugating enzyme E2 T                                     | UBE2T     | 1 |
| IPI00297444 | Isoform 1 of CD177 antigen precursor                                  | CD177     | 1 |
| IPI00161119 | Isoform 1 of NF-kappa-B inhibitor beta                                | NFKBIB    | 1 |
| IPI00016577 | CDNA: FLJ22814 fis, clone KAIA3004                                    | CD22      | 1 |
| IPI00852633 | 16 kDa protein                                                        | RABL2B    | 1 |

|             |                                                                      |              |   |
|-------------|----------------------------------------------------------------------|--------------|---|
| IPI00163391 | Isoform 1 of Putative methyltransferase METT10D                      | METT10D      | 1 |
| IPI00299679 | Isoform B of Ral guanine nucleotide dissociation stimulator-like 1   | RGL1         | 1 |
| IPI00797699 | 20 kDa protein                                                       | -            | 1 |
| IPI00333126 | Leucine-rich repeat-containing protein 56                            | LRRC56       | 1 |
| IPI00794119 | 13 kDa protein                                                       | ABCC8        | 1 |
| IPI00816274 | Chemokine-like factor superfamily 1 transcript variant 26            | CMTM1        | 1 |
| IPI00032830 | Isoform 1 of Oligoribonuclease, mitochondrial precursor (Fragment)   | REXO2        | 1 |
| IPI00171737 | Isoform 2 of Leucine-rich repeat and death domain-containing protein | LRDD         | 1 |
| IPI00385003 | Putative transposase                                                 | TIGD1        | 1 |
| IPI00029123 | Isoform A of Endothelin B receptor precursor                         | EDNRB        | 1 |
| IPI00218487 | Gap junction alpha-1 protein                                         | GJA1         | 1 |
| IPI00158992 | snRNA-activating protein complex subunit 4                           | SNAPC4       | 1 |
| IPI00394712 | Granulocyte inhibitory protein                                       | -            | 1 |
| IPI00001869 | Pappalysin-1 precursor                                               | PAPPA        | 1 |
| IPI00027834 | heterogeneous nuclear ribonucleoprotein L isoform a                  | HNRNPL       | 1 |
| IPI00062730 | Uncharacterized protein C16orf45                                     | C16orf45     | 1 |
| IPI00298258 | UNC13B protein                                                       | UNC13B       | 1 |
| IPI00018352 | Ubiquitin carboxyl-terminal hydrolase isozyme L1                     | UCHL1        | 1 |
| IPI00744366 | Conserved hypothetical protein                                       | -            | 1 |
| IPI00008905 | UDP-glucuronosyltransferase 2B15 precursor                           | UGT2B15      | 1 |
| IPI00377077 | Isoform 3 of Astrotactin-2 precursor                                 | ASTN2        | 1 |
| IPI00009294 | Cysteine-rich motor neuron 1 protein precursor                       | CRIM1        | 1 |
| IPI00186581 | amplified in osteosarcoma isoform 2 precursor                        | OS9          | 1 |
| IPI00445364 | CDNA FLJ44171 fis, clone THYMU2036058                                | -            | 1 |
| IPI00021985 | transmembrane 9 superfamily protein member 4                         | TM9SF4       | 1 |
| IPI00166071 | B-cell CLL/lymphoma 6 member B protein                               | BCL6B        | 1 |
| IPI00217023 | MMAA protein                                                         | MMAA         | 1 |
| IPI00455521 | similar to transmembrane protein 46                                  | C22:CTA-250D | 1 |
| IPI00034006 | Tyrosine-protein phosphatase non-receptor type 23                    | PTPN23       | 1 |
| IPI00021274 | Ephrin type-A receptor 8 precursor                                   | EPHA8        | 1 |
| IPI00394820 | Olfactomedin-like protein 1 precursor                                | OLFML1       | 1 |
| IPI00419253 | Isoform 1 of Nck-associated protein 5                                | NAP5         | 1 |
| IPI00029012 | Eukaryotic translation initiation factor 3 subunit A                 | EIF3A        | 1 |
| IPI00043201 | Centromere protein J                                                 | CENPJ        | 1 |
| IPI00385042 | Nucleolar GTP-binding protein 1                                      | GTPBP4       | 1 |
| IPI00410013 | Isoform 1 of Zinc finger CCCH domain-containing protein 3            | ZC3H3        | 1 |
| IPI00402144 | Isoform 1 of Zinc finger protein 555                                 | ZNF555       | 1 |
| IPI00478986 | Similar to 40S ribosomal protein S4                                  | LOC126235    | 1 |
| IPI00478521 | Isoform 1 of UPF0475 protein                                         | RILPL1       | 1 |
| IPI00420071 | microtubule-associated protein 6 isoform 1                           | MAP6         | 1 |

|             |                                                                             |             |   |
|-------------|-----------------------------------------------------------------------------|-------------|---|
| IPI00555614 | Heat shock protein 90Bc                                                     | HSP90AB3P   | 1 |
| IPI00026530 | Protein ERGIC-53 precursor                                                  | LMAN1       | 1 |
| IPI00025700 | Isoform CD6A of T-cell differentiation antigen CD6 precursor                | CD6         | 1 |
| IPI00016949 | Isoform 4 of Electrogenic sodium bicarbonate cotransporter 1                | SLC4A4      | 1 |
| IPI00297040 | Serine protease inhibitor Kazal-type 6 precursor                            | SPINK6      | 1 |
| IPI00454910 | Serine/threonine-protein kinase MRCK gamma                                  | CDC42BPG    | 1 |
| IPI00031547 | Desmoglein-3 precursor                                                      | DSG3        | 1 |
| IPI00384722 | Isoform 2 of UPF0510 protein C19orf63 precursor                             | C19orf63    | 1 |
| IPI00382756 | Isoform 2 of Pleiotropic regulator 1                                        | PLRG1       | 1 |
| IPI00604599 | Transmembrane emp24 domain-containing protein 3 precursor                   | TMED3       | 1 |
| IPI00743284 | Methionine synthase                                                         | MTR         | 1 |
| IPI00021363 | Histone demethylase JARID1A                                                 | JARID1A     | 1 |
| IPI00749440 | Uncharacterized protein ENSP00000368180                                     | -           | 1 |
| IPI00216683 | M-phase inducer phosphatase 3                                               | CDC25C      | 1 |
| IPI00015522 | Growth/differentiation factor 5 precursor                                   | GDF5        | 1 |
| IPI00877084 | Isoform 1 of Coiled-coil domain-containing protein 144C                     | CCDC144C    | 1 |
| IPI00060265 | Zinc finger protein 775                                                     | ZNF775      | 1 |
| IPI00024802 | TATA-binding protein-associated factor 172                                  | BTAF1       | 1 |
| IPI00374039 | Conserved hypothetical protein                                              | C1orf189    | 1 |
| IPI00302133 | Transient receptor potential cation channel subfamily V member 5            | TRPV5       | 1 |
| IPI00028786 | Isoform 3 of Polycystin-1 precursor                                         | PKD1        | 1 |
| IPI00167254 | Isoform 4 of Inactive phospholipase D5                                      | PLD5        | 1 |
| IPI00013455 | CLIP1 protein                                                               | CLIP1       | 1 |
| IPI00026299 | Isoform Glycophorin C of Glycophorin-C                                      | GYPC        | 1 |
| IPI00845508 | BAH domain and coiled-coil containing 1                                     | BAHCC1      | 1 |
| IPI00745300 | 31 kDa protein                                                              | NAT11       | 1 |
| IPI00009148 | Diphosphoinositol polyphosphate phosphohydrolase 1                          | NUDT3       | 1 |
| IPI00787932 | similar to zinc finger protein 10                                           | hCG_1646157 | 1 |
| IPI00166161 | Protein SIX6OS1                                                             | C14orf39    | 1 |
| IPI00180426 | Isoform 3 of G protein-coupled receptor kinase 4                            | GRK4        | 1 |
| IPI00382420 | Ig lambda chain V-I region HA                                               | -           | 1 |
| IPI00166553 | Isoform 1 of Protein FAM19A2 precursor                                      | FAM19A2     | 1 |
| IPI00004315 | Sialic acid-binding Ig-like lectin 9 precursor                              | SIGLEC9     | 1 |
| IPI00796906 | 8 kDa protein                                                               | ABCF3       | 1 |
| IPI00028932 | Microtubule-associated serine/threonine-protein kinase 3                    | MAST3       | 1 |
| IPI00018708 | Isoform 2 of Centrosomal protein of 63 kDa                                  | CEP63       | 1 |
| IPI00011578 | Isoform 1 of Neuroplastin precursor                                         | NPTN        | 1 |
| IPI00387159 | Isoform 1 of Inhibitor of growth protein 3                                  | ING3        | 1 |
| IPI00645089 | Kv channel interacting protein 1 isoform 3                                  | KCNIP1      | 1 |
| IPI00167619 | Leucine-rich repeat and transmembrane domain-containing protein 2 precursor | LRTM2       | 1 |

|             |                                                                         |              |   |
|-------------|-------------------------------------------------------------------------|--------------|---|
| IPI00374862 | Isoform 1 of Kelch-like protein 5                                       | KLHL5        | 1 |
| IPI00009377 | HSPC212                                                                 | C3orf19      | 1 |
| IPI00300244 | zinc finger, CW type with PWWP domain 1                                 | ZCWPW1       | 1 |
| IPI00333410 | Isoform 1 of Ubiquitin-conjugating enzyme E2 Q1                         | UBE2Q1       | 1 |
| IPI00018311 | Isoform 2 of Neuroplastin precursor                                     | NPTN         | 1 |
| IPI00168862 | Conserved hypothetical protein                                          | PXT1         | 1 |
| IPI00025647 | Isoform 1 of F-box only protein 21                                      | FBXO21       | 1 |
| IPI00027429 | Putative uncharacterized protein DKFZp547J2313                          | FABP7        | 1 |
| IPI00013281 | Fukutin-related protein                                                 | FKRP         | 1 |
| IPI00252845 | SYT9 protein                                                            | SYT9         | 1 |
| IPI00171611 | Histone H3.2                                                            | HIST2H3C;HIS | 1 |
| IPI00477361 | 10 kDa protein                                                          | SDHALP1      | 1 |
| IPI00397578 | 135 kDa protein                                                         | PPFIA4       | 1 |
| IPI00031019 | Cystatin-8 precursor                                                    | CST8         | 1 |
| IPI00017659 | Protein kinase substrate CapZIP                                         | RCSD1        | 1 |
| IPI00744706 | 282 kDa protein                                                         | SPTAN1       | 1 |
| IPI00025094 | CDNA: FLJ22037 fis, clone HEP08868 (Fragment)                           | MYH16        | 1 |
| IPI00830057 | Uncharacterized protein ENSP00000374791                                 | -            | 1 |
| IPI00023315 | Bone morphogenetic protein 3b precursor                                 | GDF10        | 1 |
| IPI00010895 | Tubby-related protein 2                                                 | TULP2        | 1 |
| IPI00739106 | similar to ribosomal protein L5 isoform 1                               | LOC647436    | 1 |
| IPI00022606 | Isoform 1 of Proline-serine-threonine phosphatase-interacting protein 1 | PSTPIP1      | 1 |
| IPI00550232 | cardiomyopathy associated 3 isoform 1                                   | XIRP2        | 1 |
| IPI00295502 | Isoform 1 of Protein Wiz                                                | WIZ          | 1 |
| IPI00216106 | Isoform 3 of Obg-like ATPase 1                                          | OLA1         | 1 |
| IPI00010118 | Isoform 1 of Prostate tumor overexpressed gene 1 protein                | PTOV1        | 1 |
| IPI00300990 | Isoform 1 of Uncharacterized protein C1orf77                            | C1orf77      | 1 |
| IPI00741780 | similar to CG4845-PA                                                    | LOC652559    | 1 |
| IPI00454858 | similar to alpha 3 type VI collagen isoform 1 precursor                 | LOC344875    | 1 |
| IPI00399328 | similar to jumonji domain containing 2D                                 | LOC390245    | 1 |
| IPI00479083 | Isoform 2 of Erythroid differentiation-related factor 1                 | C10orf137    | 1 |
| IPI00168885 | Isoform 1 of Putative ATP-dependent RNA helicase DHX57                  | DHX57        | 1 |
| IPI00010575 | KIAA1466 protein                                                        | KIAA1466     | 1 |
| IPI00785015 | Isoform 1 of Uncharacterized protein KIAA2030                           | FLJ25778     | 1 |
| IPI00106502 | Kelch-like ECH-associated protein 1                                     | KEAP1        | 1 |
| IPI00830025 | Uncharacterized protein ENSP00000375021                                 | -            | 1 |
| IPI00187143 | Isoform 2 of Ras-related protein Rab-4B                                 | RAB4B        | 1 |
| IPI00103630 | Isoform 2 of Protein phosphatase 1E                                     | PPM1E        | 1 |
| IPI00216508 | Isoform 2 of Sorting nexin-3                                            | SNX3         | 1 |
| IPI00011400 | T-lymphoma invasion and metastasis-inducing protein 1                   | TIAM1        | 1 |

|             |                                                                                   |          |   |
|-------------|-----------------------------------------------------------------------------------|----------|---|
| IPI00299485 | Complement component C1q receptor precursor                                       | CD93     | 1 |
| IPI00060146 | Isoform 1 of Smith-Magenis syndrome chromosome region candidate gene 7 protein    | SMCR7    | 1 |
| IPI00329688 | Protein YIPF3                                                                     | YIPF3    | 1 |
| IPI00022989 | Isoform Beta-1 of Retinoic acid receptor beta                                     | RARB     | 1 |
| IPI00152072 | hypothetical protein LOC387758                                                    | FIBIN    | 1 |
| IPI00060546 | Uncharacterized protein C10orf35                                                  | C10orf35 | 1 |
| IPI00412541 | Probable G-protein coupled receptor 158 precursor                                 | GPR158   | 1 |
| IPI00043978 | Isoform 1 of Partitioning-defective 3 homolog B                                   | PARD3B   | 1 |
| IPI00440221 | Putative uncharacterized protein (Fragment)                                       | CDC2L5   | 1 |
| IPI00011564 | Syndecan-4 precursor                                                              | SDC4     | 1 |
| IPI00423683 | Isoform 2 of EMI domain-containing protein 1 precursor                            | EMID1    | 1 |
| IPI00026612 | Isoform Beta-1 of Protein phosphatase 1B                                          | PPM1B    | 1 |
| IPI00167137 | Isoform 3 of SLAM family member 7 precursor                                       | SLAMF7   | 1 |
| IPI00155447 | MMP28 protein                                                                     | MMP28    | 1 |
| IPI00001434 | Protocadherin beta 14 precursor                                                   | PCDHB14  | 1 |
| IPI00854745 | Uncharacterized protein ENSP00000375019                                           | -        | 1 |
| IPI00043731 | CDNA FLJ30671 fis, clone FCBBF1000687, moderately similar to Mus musculus Rap2 in | RUNDC3B  | 1 |
| IPI00645814 | Isoform 2 of MAP7 domain-containing protein 1                                     | MAP7D1   | 1 |
| IPI00003353 | Neuronal protein 3.1                                                              | C5orf13  | 1 |
| IPI00007402 | Importin-7                                                                        | IPO7     | 1 |
| IPI00152470 | Prokineticin receptor 1                                                           | PROKR1   | 1 |
| IPI00006094 | Regulating synaptic membrane exocytosis protein 3                                 | RIMS3    | 1 |
| IPI00169426 | Isoform 2 of Cytosolic 5'-nucleotidase 1B                                         | NT5C1B   | 1 |
| IPI00816794 | REV25-2 (Fragment)                                                                | -        | 1 |
| IPI00010346 | Neurolysin, mitochondrial precursor                                               | NLN      | 1 |
| IPI00013216 | Origin recognition complex subunit 2                                              | ORC2L    | 1 |
| IPI00216572 | BarH-like homeobox 2                                                              | BARX2    | 1 |
| IPI00644025 | Isoform 1 of Synaptic vesicle glycoprotein 2A                                     | SV2A     | 1 |
| IPI00171647 | Isoform 1 of Sialic acid-binding Ig-like lectin 8 precursor                       | SIGLEC8  | 1 |
| IPI00020058 | Isoform 1 of Copper-transporting ATPase 2                                         | ATP7B    | 1 |
| IPI00026570 | Cytochrome c oxidase polypeptide VIIa-liver/heart, mitochondrial precursor        | COX7A2   | 1 |
| IPI00027726 | Isoform 1 of Krueppel-like factor 3                                               | KLF3     | 1 |
| IPI00064241 | Isoform 1 of Zinc finger protein Eos                                              | IKZF4    | 1 |
| IPI00295503 | Isoform 2 of Probable ATP-dependent RNA helicase DDX58                            | DDX58    | 1 |
| IPI00307591 | Zinc finger protein 609                                                           | ZNF609   | 1 |
| IPI00290292 | Rhomboid 5 homolog 1                                                              | RHBDF1   | 1 |
| IPI00003348 | Guanine nucleotide-binding protein G(I)/G(S)/G(T) subunit beta-2                  | GNB2     | 1 |
| IPI00299435 | apolipoprotein F precursor                                                        | APOF     | 1 |
| IPI00029533 | Integrin beta-8 precursor                                                         | ITGB8    | 1 |
| IPI00815786 | Hexokinase 1 (Fragment)                                                           | HK1      | 1 |

|             |                                                                            |             |   |
|-------------|----------------------------------------------------------------------------|-------------|---|
| IPI00375881 | Polycystic kidney disease 1-like protein 3                                 | PKD1L3      | 1 |
| IPI00008998 | Protein tyrosine phosphatase-like protein PTPLAD1                          | PTPLAD1     | 1 |
| IPI00658112 | 32 kDa protein                                                             | SPEG        | 1 |
| IPI00479361 | Isoform 1 of UDP-GlcNAc:betaGal beta-1,3-N-acetylglucosaminyltransferase 4 | B3GNT4      | 1 |
| IPI00448465 | Isoform 1 of Ankyrin repeat domain-containing protein 12                   | ANKRD12     | 1 |
| IPI00745122 | Conserved hypothetical protein                                             | MGC33894    | 1 |
| IPI00783471 | Immunglobulin heavy chain variable region (Fragment)                       | -           | 1 |
| IPI00023542 | transmembrane emp24 protein transport domain containing 9                  | TMED9       | 1 |
| IPI00383832 | Protein kinase C-binding protein RACK8                                     | DVL3        | 1 |
| IPI00027685 | C-C chemokine receptor type 1                                              | CCR1        | 1 |
| IPI00432755 | PPRR6495                                                                   | FAM124A     | 1 |
| IPI00796777 | 17 kDa protein                                                             | CRYAA       | 1 |
| IPI00008894 | Carboxypeptidase A4 precursor                                              | CPA4        | 1 |
| IPI00847759 | DENN domain-containing protein 4B                                          | DENND4B     | 1 |
| IPI00008315 | Isoform 1 of Ephrin type-B receptor 1 precursor                            | EPHB1       | 1 |
| IPI00031005 | Protein kinase-like protein SgK196                                         | FLJ23356    | 1 |
| IPI00787414 | Uncharacterized protein ENSP00000381388                                    | MGC34829    | 1 |
| IPI00019988 | N-sulphoglucosamine sulphohydrolase precursor                              | SGSH        | 1 |
| IPI00059164 | Galactose-3-O-sulfotransferase 3                                           | GAL3ST3     | 1 |
| IPI00175654 | Probable mast cell antigen 32 homolog precursor                            | C17orf60    | 1 |
| IPI00873740 | Uncharacterized protein ENSP00000383832 (Fragment)                         | -           | 1 |
| IPI00032416 | Isoform Long of Protein jagged-2 precursor                                 | JAG2        | 1 |
| IPI00335589 | RNA methyltransferase-like protein 1                                       | RNMTL1      | 1 |
| IPI00843819 | Similar to Dual specificity protein kinase CLK2                            | -           | 1 |
| IPI00065276 | Isoform 2 of Tether containing UBX domain for GLUT4                        | ASPSCR1     | 1 |
| IPI00644522 | PNKP protein                                                               | PNKP        | 1 |
| IPI00045511 | Isoform 1 of Chloride channel CLIC-like protein 1 precursor                | CLCC1       | 1 |
| IPI00604763 | Transmembrane protein 66 precursor                                         | TMEM66      | 1 |
| IPI00829759 | Uncharacterized protein ENSP00000375040                                    | -           | 1 |
| IPI00235647 | similar to fibrillarin                                                     | LOC345630   | 1 |
| IPI00294910 | Protein PARM-1 precursor                                                   | DKFZP564O08 | 1 |
| IPI00217652 | Isoform 1 of Glycosyltransferase 8 domain-containing protein 3             | GLT8D3      | 1 |
| IPI00470805 | Isoform 2 of Mediator of DNA damage checkpoint protein 1                   | MDC1        | 1 |
| IPI00167089 | Isoform 2 of Activated CDC42 kinase 1                                      | TNK2        | 1 |
| IPI00385143 | Microfibrillar protein 2 (Fragment)                                        | -           | 1 |
| IPI00783753 | UPF0235 protein C15orf40                                                   | C15orf40    | 1 |
| IPI00445716 | Isoform 1 of GDNF family receptor alpha-3 precursor                        | GFRA3       | 1 |
| IPI00030919 | Mitogen-activated protein kinase kinase 1-interacting protein 1            | MAP2K1IP1   | 1 |
| IPI00827745 | Isoform 1 of RNA-binding protein 24                                        | RBM24       | 1 |
| IPI00005776 | Nucleotide-binding oligomerization domain-containing protein 1             | NOD1        | 1 |

|             |                                                                                       |              |   |
|-------------|---------------------------------------------------------------------------------------|--------------|---|
| IPI00394879 | Leucine-rich repeat-containing protein 9                                              | LRRC9        | 1 |
| IPI00401852 | Conserved hypothetical protein                                                        | DKFZP434L187 | 1 |
| IPI00306884 | CDNA FLJ11867 fis, clone HEMBA1006976, weakly similar to H.sapiens Gal-beta(1-3/1-4)  | ST3GAL4      | 1 |
| IPI00748891 | hypothetical protein LOC283635 isoform 1                                              | C14orf24     | 1 |
| IPI00874023 | Uncharacterized protein ENSP00000379699                                               | -            | 1 |
| IPI00020199 | Alpha-2,8-sialyltransferase 8B                                                        | ST8SIA2      | 1 |
| IPI00297714 | Gamma-synuclein                                                                       | SNCG         | 1 |
| IPI00005158 | Lon protease homolog, mitochondrial precursor                                         | LONP1        | 1 |
| IPI00791513 | CDNA FLJ16614 fis, clone TESTI4013365                                                 | CTA-216E10.6 | 1 |
| IPI00013319 | Isoform 2 of 43 kDa receptor-associated protein of the synapse                        | RAPSN        | 1 |
| IPI00828037 | Heavy chain Fab (Fragment)                                                            | -            | 1 |
| IPI00020201 | CMP-N-acetylneuraminate-poly-alpha-2,8-sialyltransferase                              | ST8SIA4      | 1 |
| IPI00217537 | Isoform 1 of Putative Polycomb group protein ASXL1                                    | ASXL1        | 1 |
| IPI00002884 | CDNA: FLJ22222 fis, clone HRC01658                                                    | FLJ22222     | 1 |
| IPI00025092 | Myosin-binding protein C, slow-type                                                   | MYBPC1       | 1 |
| IPI00003363 | Isoform 1 of Protein phosphatase 1 regulatory subunit 1B                              | PPP1R1B      | 1 |
| IPI00022078 | Protein NDRG1                                                                         | NDRG1        | 1 |
| IPI00290857 | Keratin, type II cytoskeletal 3                                                       | KRT3         | 1 |
| IPI00164949 | Isoform NELF-C of Negative elongation factor C/D                                      | TH1L         | 1 |
| IPI00029647 | Zymogen granule membrane protein 16 precursor                                         | ZG16         | 1 |
| IPI00414481 | GTF3C1 protein                                                                        | GTF3C1       | 1 |
| IPI00640818 | Isoform 3 of Neuropathy target esterase                                               | PNPLA6       | 1 |
| IPI00164861 | Isoform 3 of Kinesin-like protein KIF13A                                              | KIF13A       | 1 |
| IPI00411674 | Isoform 1 of Zinc finger protein 254                                                  | ZNF254       | 1 |
| IPI00025365 | Isoform Long of Endothelin-3 precursor                                                | EDN3         | 1 |
| IPI00020131 | Son of sevenless homolog 1                                                            | SOS1         | 1 |
| IPI00828191 | NANUC-2 heavy chain (Fragment)                                                        | -            | 1 |
| IPI00249982 | Isoform 1 of Death-inducer obliterator 1                                              | DIDO1        | 1 |
| IPI00025473 | Beta-1,4 N-acetylgalactosaminyltransferase 1                                          | B4GALNT1     | 1 |
| IPI00328270 | Neuronal PAS domain-containing protein 2                                              | NPAS2        | 1 |
| IPI00432707 | Caspase-12                                                                            | CASP12       | 1 |
| IPI00442544 | CDNA FLJ27034 fis, clone SLV07984                                                     | -            | 1 |
| IPI00175019 | similar to Temporarily Assigned Gene name family member                               | LOC643677    | 1 |
| IPI00027898 | Isoform A of Uncharacterized protein C21orf70                                         | C21orf70     | 1 |
| IPI00019485 | Isoform 2 of Enoyl-CoA hydratase domain-containing protein 2, mitochondrial precursor | ECHDC2       | 1 |
| IPI00023340 | Histone acetyltransferase MYST3                                                       | MYST3        | 1 |
| IPI00300052 | Keratin type II cuticular Hb4                                                         | KRT84        | 1 |
| IPI00383594 | melanoma ubiquitous mutated protein                                                   | MUM1         | 1 |
| IPI00019158 | ADAM metallopeptidase domain 8 precursor                                              | ADAM8        | 1 |
| IPI00005605 | Isoform 1 of Protein NDRG3                                                            | NDRG3        | 1 |

|             |                                                                 |           |   |
|-------------|-----------------------------------------------------------------|-----------|---|
| IPI00045928 | Sodium/hydrogen exchanger 7                                     | SLC9A7    | 1 |
| IPI00306332 | 60S ribosomal protein L24                                       | RPL24     | 1 |
| IPI00015047 | 8D6 antigen (Fragment)                                          | CD320     | 1 |
| IPI00001786 | Isoform 2 of Ubiquitin carboxyl-terminal hydrolase 36           | USP36     | 1 |
| IPI00745103 | similar to melanoma associated antigen (mutated) 1-like 1       | LOC728307 | 1 |
| IPI00827846 | Anti-mucin1 heavy chain variable region (Fragment)              | -         | 1 |
| IPI00385791 | Serologically defined breast cancer antigen NY-BR-87 (Fragment) | MRPS26    | 1 |
| IPI00145805 | Isoform 1 of TRAF2 and NCK-interacting protein kinase           | TNIK      | 1 |
| IPI00296374 | Zinc finger protein-like 1                                      | ZFPL1     | 1 |
| IPI00021733 | Bifunctional heparan sulfate N-deacetylase/N-sulfotransferase 4 | NDST4     | 1 |
| IPI00184884 | Non-structural maintenance of chromosomes element 1 homolog     | NSMCE1    | 1 |
| IPI00103874 | Isoform 1 of Zinc finger FYVE domain-containing protein 1       | ZFYVE1    | 1 |
| IPI00243221 | nardilysin (N-arginine dibasic convertase) isoform a            | NRD1      | 1 |
| IPI00220791 | Amphiphysin I variant CT2                                       | AMPH      | 1 |
| IPI00015983 | Sphingosine 1-phosphate receptor Edg-3                          | EDG3      | 1 |
| IPI00289965 | Potassium voltage-gated channel subfamily C member 3            | KCNC3     | 1 |
| IPI00374129 | NLR family, pyrin domain containing 3 isoform b                 | NLRP3     | 1 |
| IPI00007617 | Olfactory receptor 52A1                                         | OR52A1    | 1 |
| IPI00297288 | Cdc42 GTPase-activating protein                                 | CDGAP     | 1 |
| IPI00748890 | Isoform 1 of Leucine zipper protein 2 precursor                 | LUZP2     | 1 |
| IPI00376587 | Uncharacterized protein ENSP00000345065                         | LOC728780 | 1 |
| IPI00297251 | Isoform 2 of Probable E3 ubiquitin-protein ligase MGRN1         | MGRN1     | 1 |
| IPI00438170 | Isoform 1 of Sorting nexin-12                                   | SNX12     | 1 |
| IPI00373823 | Cytochrome P450 26C1                                            | CYP26C1   | 1 |
| IPI00550917 | Twinfilin-2                                                     | TWF2      | 1 |
| IPI00301294 | Protein FAM134A                                                 | FAM134A   | 1 |
| IPI00021951 | Uncharacterized protein KIAA0247 precursor                      | KIAA0247  | 1 |
| IPI00815893 | Isoform 1 of Chromodomain-helicase-DNA-binding protein 2        | CHD2      | 1 |
| IPI00002243 | Isoform 1 of Gamma-glutamyltransferase 5 precursor              | GGTLA1    | 1 |
| IPI00159049 | SET-binding protein                                             | SETBP1    | 1 |
| IPI00297277 | Isoform 1 of RING finger protein 150 precursor                  | RNF150    | 1 |
| IPI00031765 | Isoform 2 of Protocadherin gamma C4 precursor                   | PCDHGC4   | 1 |
| IPI00016685 | Enamelin precursor                                              | ENAM      | 1 |
| IPI00002191 | Putative uncharacterized protein FLJ12684                       | -         | 1 |
| IPI00007928 | Pre-mRNA-processing-splicing factor 8                           | PRPF8     | 1 |
| IPI00022542 | Rho-associated protein kinase 1                                 | ROCK1     | 1 |
| IPI00028053 | Gap junction alpha-9 protein                                    | GJA9      | 1 |
| IPI00005732 | Isoform 1 of Activin receptor type-1B precursor                 | ACVR1B    | 1 |
| IPI00293095 | Isoform 1 of Coiled-coil domain-containing protein 83           | CCDC83    | 1 |
| IPI00747142 | Centaurin-gamma-like family member 6                            | CTGLF6    | 1 |



|             |                                                                       |           |   |
|-------------|-----------------------------------------------------------------------|-----------|---|
| IPI00040900 | Isoform 2 of Heparan sulfate 2-O-sulfotransferase 1                   | HS2ST1    | 1 |
| IPI00011515 | Protein kinase C and casein kinase substrate in neurons protein 1     | PACSN1    | 1 |
| IPI00164066 | Isoform 4 of Coiled-coil domain-containing protein 136                | CCDC136   | 1 |
| IPI00307702 | H53_GS1 (Fragment)                                                    | -         | 1 |
| IPI00307611 | Isoform 1 of Microtubule-associated serine/threonine-protein kinase 4 | MAST4     | 1 |
| IPI00014444 | Isoform 1 of Protein SERAC1                                           | SERAC1    | 1 |
| IPI00479217 | Isoform Short of Heterogeneous nuclear ribonucleoprotein U            | HNRNPU    | 1 |
| IPI00183206 | Isoform 1 of RIM-binding protein 2                                    | RIMBP2    | 1 |
| IPI00220070 | 6-phosphofructo-2-kinase/fructose-2,6-biphosphatase 4                 | PFKFB4    | 1 |
| IPI00023322 | Zinc finger protein ubi-d4                                            | DPF2      | 1 |
| IPI00784739 | Uncharacterized protein C14orf43                                      | C14orf43  | 1 |
| IPI00738920 | similar to CG3104-PA, isoform A                                       | LOC642574 | 1 |
| IPI00056314 | Pre-rRNA-processing protein TSR2 homolog                              | TSR2      | 1 |
| IPI00797694 | 3 kDa protein                                                         | -         | 1 |
| IPI00294210 | DNA-binding protein inhibitor ID-2                                    | ID2       | 1 |
| IPI00787020 | similar to Dynamin-1                                                  | LOC644153 | 1 |
| IPI00167941 | Midasin                                                               | MDN1      | 1 |
| IPI00016701 | P2Y purinoceptor 14                                                   | P2RY14    | 1 |
| IPI00166039 | Isoform 1 of Scotin precursor                                         | SCOTIN    | 1 |
| IPI00009899 | Uncharacterized protein C5orf5                                        | C5orf5    | 1 |
| IPI00005129 | Isoform 1 of Secretory carrier-associated membrane protein 1          | SCAMP1    | 1 |
| IPI00217948 | FRMD4B protein                                                        | FRMD4B    | 1 |
| IPI00027457 | C1q-related factor precursor                                          | C1QL1     | 1 |
| IPI00002993 | Transcription initiation factor TFIID subunit 9                       | TAF9      | 1 |
| IPI00555600 | Solute carrier family 26, member 1 isoform a variant (Fragment)       | IDUA      | 1 |
| IPI00419221 | Membrane-bound O-acyltransferase domain-containing protein 2          | MBOAT2    | 1 |
| IPI00021634 | Kinesin light chain 2                                                 | KLC2      | 1 |
| IPI00384225 | Meteorin precursor                                                    | METRNL    | 1 |
| IPI00375803 | Isoform 1 of GON-4-like protein                                       | GON4L     | 1 |
| IPI00023184 | Isoform 1 of Poly [ADP-ribose] polymerase 3                           | PARP3     | 1 |
| IPI00872739 | Uncharacterized protein C18orf2                                       | C18orf2   | 1 |
| IPI00241409 | hypothetical protein LOC55747                                         | FAM21B    | 1 |
| IPI00090764 | Toll-like receptor 1 precursor                                        | TLR1      | 1 |
| IPI00141938 | H2A histone family, member V isoform 2                                | H2AFV     | 1 |
| IPI00024253 | Isoform 1 of Fibroblast growth factor 14                              | FGF14     | 1 |
| IPI00387096 | Ig kappa chain V-I region Kue                                         | -         | 1 |
| IPI00218637 | Major histocompatibility complex, class II, DQ beta 2                 | HLA-DQB2  | 1 |
| IPI00216921 | Isoform 2 of Stathmin-4                                               | STMN4     | 1 |
| IPI00011416 | Delta(3,5)-Delta(2,4)-dienoyl-CoA isomerase, mitochondrial precursor  | ECH1      | 1 |
| IPI00260755 | similar to Rho GTPase activating protein 18                           | C20orf95  | 1 |

|             |                                                                               |           |   |
|-------------|-------------------------------------------------------------------------------|-----------|---|
| IPI00337385 | Isoform 1 of Pre-mRNA-processing factor 40 homolog A                          | PRPF40A   | 1 |
| IPI00304527 | Protein FAM83B                                                                | FAM83B    | 1 |
| IPI00000459 | Transmembrane gamma-carboxyglutamic acid protein 1 precursor                  | PRRG1     | 1 |
| IPI00030741 | Uncharacterized protein C21orf13                                              | LCA5L     | 1 |
| IPI00399296 | hypothetical protein LOC390110                                                | LOC390110 | 1 |
| IPI00233358 | islet cell autoantigen 1,69kDa-like isoform 2                                 | ICA1L     | 1 |
| IPI00879842 | 6 kDa protein                                                                 | -         | 1 |
| IPI00021476 | Eukaryotic translation initiation factor 4E-binding protein 3                 | EIF4EBP3  | 1 |
| IPI00028383 | Uncharacterized protein C16orf24                                              | C16orf24  | 1 |
| IPI00001863 | Wnt inhibitory factor 1 precursor                                             | WIF1      | 1 |
| IPI00298337 | cDNA FLJ77671                                                                 | SLC14A1   | 1 |
| IPI00044842 | Isoform 2 of RAB3A-interacting protein                                        | RAB3IP    | 1 |
| IPI00022055 | Histone acetyltransferase PCAF                                                | PCAF      | 1 |
| IPI00328260 | Protein FAN                                                                   | NSMAF     | 1 |
| IPI00807418 | Isoform 9 of Lymphoid-specific helicase                                       | HELLS     | 1 |
| IPI00183002 | Isoform 1 of Protein phosphatase 1 regulatory subunit 12A                     | PPP1R12A  | 1 |
| IPI00163601 | Putative uncharacterized protein FLJ10213                                     | FLJ10213  | 1 |
| IPI00428741 | LP2477                                                                        | FLJ35348  | 1 |
| IPI00006252 | Multisynthetase complex auxiliary component p43                               | SCYE1     | 1 |
| IPI00007321 | Isoform 1 of Acyl-protein thioesterase 1                                      | LYPLA1    | 1 |
| IPI00217617 | palmitoylated membrane protein 7                                              | MPP7      | 1 |
| IPI00306850 | EGF-like-domain, multiple 3                                                   | MEGF6     | 1 |
| IPI00024662 | Chromobox protein homolog 5                                                   | CBX5      | 1 |
| IPI00169331 | Phosphatidylcholine:ceramide cholinephosphotransferase 2                      | SGMS2     | 1 |
| IPI00783464 | dynein heavy chain domain 3                                                   | DNAH2     | 1 |
| IPI00298702 | solute carrier family 39 (zinc transporter), member 6 isoform 1               | SLC39A6   | 1 |
| IPI00185088 | immunoglobulin superfamily, member 11 isoform b                               | IGSF11    | 1 |
| IPI00010405 | Isoform Long of Tyrosine-protein kinase transmembrane receptor ROR1 precursor | ROR1      | 1 |
| IPI00873774 | Uncharacterized protein ENSP00000383488 (Fragment)                            | -         | 1 |
| IPI00847335 | FLJ45422 protein                                                              | -         | 1 |
| IPI00877800 | 32 kDa protein                                                                | -         | 1 |
| IPI00008497 | Ornithine decarboxylase                                                       | ODC1      | 1 |
| IPI00010808 | Interferon-gamma receptor alpha chain precursor                               | IFNGR1    | 1 |
| IPI00827485 | BRE (Fragment)                                                                | -         | 1 |
| IPI00514622 | Ran-binding protein 6                                                         | RANBP6    | 1 |
| IPI00009203 | Sorting nexin-7                                                               | SNX7      | 1 |
| IPI00790021 | Zinc finger protein 652                                                       | ZNF652    | 1 |
| IPI00000027 | Pituitary adenylate cyclase-activating polypeptide precursor                  | ADCYAP1   | 1 |
| IPI00033600 | Isoform 1 of Protein phosphatase 1 regulatory subunit 7                       | PPP1R7    | 1 |
| IPI00375746 | Isoform 1 of Guanylate-binding protein 6                                      | GBP6      | 1 |

|             |                                                                          |           |   |
|-------------|--------------------------------------------------------------------------|-----------|---|
| IPI00180384 | dynein, axonemal, heavy chain 7                                          | DNAH7     | 1 |
| IPI00176920 | Nephrocystin-4                                                           | NPHP4     | 1 |
| IPI00045839 | Isoform 3 of Prolyl 3-hydroxylase 1 precursor                            | LEPRE1    | 1 |
| IPI00008404 | Isoform Long of Segment polarity protein dishevelled homolog DVL-1-like  | DVL1L1    | 1 |
| IPI00658025 | Putative novel transcript                                                | -         | 1 |
| IPI00022958 | PRO0149                                                                  | C16orf72  | 1 |
| IPI00006987 | ATP-dependent RNA helicase DDX24                                         | DDX24     | 1 |
| IPI00023162 | UDP-N-acetylglucosamine 2-epimerase/N-acetylmannosamine kinase           | GENE      | 1 |
| IPI00019146 | Isoform 1 of Coxsackievirus and adenovirus receptor precursor            | CXADR     | 1 |
| IPI00789181 | 115 kDa protein                                                          | PLCL1     | 1 |
| IPI00742725 | Conserved hypothetical protein                                           | LOC388564 | 1 |
| IPI00878755 | 43 kDa protein                                                           | -         | 1 |
| IPI00152050 | ataxin 2-binding protein 1 isoform 3                                     | A2BP1     | 1 |
| IPI00385480 | Caskin-1                                                                 | CASKIN1   | 1 |
| IPI00465123 | KIAA0415 gene product                                                    | KIAA0415  | 1 |
| IPI00013495 | Isoform 2 of ATP-binding cassette sub-family F member 1                  | ABCF1     | 1 |
| IPI00398992 | Isoform 1 of Chromodomain-helicase-DNA-binding protein 8                 | CHD8      | 1 |
| IPI00827724 | Rheumatoid factor Vh I region precursor (Fragment)                       | -         | 1 |
| IPI00012441 | Isoform 1 of Synaptojanin-1                                              | SYNJ1     | 1 |
| IPI00006054 | Syntaphilin                                                              | SNPH      | 1 |
| IPI00008438 | 40S ribosomal protein S10                                                | RPS10     | 1 |
| IPI00152849 | Isoform 1 of G2/mitotic-specific cyclin-B3                               | CCNB3     | 1 |
| IPI00029556 | Uncharacterized protein C1orf105                                         | C1orf105  | 1 |
| IPI00217012 | pleckstrin and Sec7 domain containing                                    | PSD       | 1 |
| IPI00218730 | Rod cGMP-specific 3',5'-cyclic phosphodiesterase subunit alpha           | PDE6A     | 1 |
| IPI00215914 | ADP-ribosylation factor 1                                                | ARF1      | 1 |
| IPI00290826 | Transmembrane protein 157 precursor                                      | TMEM157   | 1 |
| IPI00553092 | V3-3 protein                                                             | IGLV7-46  | 1 |
| IPI00015980 | Isoform 2 of Multiple PDZ domain protein                                 | MPDZ      | 1 |
| IPI00830122 | A30                                                                      | -         | 1 |
| IPI00641251 | CD320 antigen precursor                                                  | CD320     | 1 |
| IPI00103853 | Isoform 1 of Putative ribosome-binding factor A, mitochondrial precursor | C18orf22  | 1 |
| IPI00301465 | 14-3-3-associated AKT substrate                                          | HJURP     | 1 |
| IPI00102678 | Isoform 1 of Pecanex-like protein 1                                      | PCNX      | 1 |
| IPI00020356 | 331 kDa protein                                                          | MAP1A     | 1 |
| IPI00008226 | 73 kDa protein                                                           | THSD3     | 1 |
| IPI00010903 | Dopey family member 1                                                    | DOPEY1    | 1 |
| IPI00735934 | similar to capicua homolog                                               | LOC646070 | 1 |
| IPI00465234 | Cytokine receptor common beta chain precursor                            | CSF2RB    | 1 |
| IPI00010303 | Serpin B4                                                                | SERPINB4  | 1 |

|             |                                                                                     |            |   |
|-------------|-------------------------------------------------------------------------------------|------------|---|
| IPI00008091 | Putative DNA helicase INO80 complex homolog 1                                       | INOC1      | 1 |
| IPI00329791 | cDNA FLJ78679, highly similar to Homo sapiens DEAD (Asp-Glu-Ala-Asp) box polypeptic | DDX46      | 1 |
| IPI00152344 | Pyridoxal phosphate phosphatase PHOSPHO2                                            | PHOSPHO2   | 1 |
| IPI00465363 | Histone H2B type 1-A                                                                | HIST1H2BA  | 1 |
| IPI00028601 | Putative metallothionein C20orf127                                                  | MT1P3      | 1 |
| IPI00011781 | Ankyrin repeat-containing protein C20orf86 precursor                                | C20orf86   | 1 |
| IPI00419908 | Uncharacterized protein GPR179                                                      | GPR179     | 1 |
| IPI00479125 | SLIT-ROBO Rho GTPase-activating protein 2                                           | SRGAP2     | 1 |
| IPI00455852 | Isoform 1 of Rho guanine nucleotide exchange factor 15                              | ARHGEF15   | 1 |
| IPI00174976 | Isoform 1 of MAGUK p55 subfamily member 5                                           | MPP5       | 1 |
| IPI00550876 | Protein maestro                                                                     | MRO        | 1 |
| IPI00795481 | Isoform 1 of Ly6/PLAUR domain-containing protein 1 precursor                        | LYPD1      | 1 |
| IPI00064296 | PRO0633                                                                             | -          | 1 |
| IPI00002459 | annexin VI isoform 2                                                                | ANXA6      | 1 |
| IPI00025311 | Isoform 1 of Breast carcinoma-amplified sequence 1                                  | BCAS1      | 1 |
| IPI00216651 | Isoform 1 of Interleukin-28 receptor alpha chain precursor                          | IL28RA     | 1 |
| IPI00216774 | Cerebellin-2                                                                        | CBLN2      | 1 |
| IPI00792945 | 38 kDa protein                                                                      | CHFR       | 1 |
| IPI00027464 | Calcineurin subunit B isoform 1                                                     | PPP3R1     | 1 |
| IPI00293530 | C3a anaphylatoxin chemotactic receptor                                              | C3AR1      | 1 |
| IPI00399180 | Serine/threonine-protein kinase SBK1                                                | SBK1       | 1 |
| IPI00007512 | Glutathione transferase omega-2                                                     | GSTO2      | 1 |
| IPI00016576 | Isoform 1 of Grainyhead-like protein 2 homolog                                      | GRHL2      | 1 |
| IPI00290308 | Tribbles homolog 1                                                                  | TRIB1      | 1 |
| IPI00005859 | Keratin, type II cytoskeletal 75                                                    | KRT75      | 1 |
| IPI00025622 | AN1-type zinc finger protein 5                                                      | ZFAND5     | 1 |
| IPI00019901 | Isoform 1 of Alpha-adducin                                                          | ADD1       | 1 |
| IPI00102808 | Isoform 1 of Dual specificity protein phosphatase 19                                | DUSP19     | 1 |
| IPI00073763 | Semaphorin-4C precursor                                                             | SEMA4C     | 1 |
| IPI00018208 | Tetratricopeptide repeat protein 33                                                 | TTC33      | 1 |
| IPI00166865 | CDGSH iron sulfur domain-containing protein 2                                       | CISD2      | 1 |
| IPI00477468 | RNA polymerase-associated protein CTR9 homolog                                      | CTR9       | 1 |
| IPI00005668 | Aldo-keto reductase family 1 member C2                                              | AKR1C2     | 1 |
| IPI00018098 | Isoform 1 of Pre-mRNA-splicing factor 38B                                           | PRPF38B    | 1 |
| IPI00243338 | 24 kDa protein                                                                      | KRT23      | 1 |
| IPI00786937 | similar to deleted in malignant brain tumors 1 isoform b precursor                  | LOC731940  | 1 |
| IPI00027744 | Isoform 1 of Mineralocorticoid receptor                                             | NR3C2      | 1 |
| IPI00718806 | arylhydrocarbon receptor repressor                                                  | AHRR;PDCD6 | 1 |
| IPI00024032 | TBC1 domain family, member 29                                                       | TBC1D29    | 1 |
| IPI00744226 | Conserved hypothetical protein                                                      | -          | 1 |

|             |                                                                                         |              |   |
|-------------|-----------------------------------------------------------------------------------------|--------------|---|
| IPI00792229 | 20 kDa protein                                                                          | TATDN1       | 1 |
| IPI00000144 | Oxytocin-neurophysin 1 precursor                                                        | OXT          | 1 |
| IPI00786893 | similar to LYRIC/3D3                                                                    | LOC730296;LC | 1 |
| IPI00015954 | GTP-binding protein SAR1a                                                               | SAR1A        | 1 |
| IPI00099838 | Isoform 1 of Lysophosphatidic acid phosphatase type 6 precursor                         | ACP6         | 1 |
| IPI00397949 | G protein-coupled receptor 56 isoform b                                                 | GPR56        | 1 |
| IPI00418735 | hypothetical protein LOC400566                                                          | LOC400566    | 1 |
| IPI00306413 | Tubulin polymerization-promoting protein family member 3                                | TPPP3        | 1 |
| IPI00018755 | High mobility group protein 1-like 10                                                   | HMG1L10      | 1 |
| IPI00385543 | Isoform 3 of UPF0469 protein KIAA0907                                                   | KIAA0907     | 1 |
| IPI00299076 | Receptor-binding cancer antigen expressed on SiSo cells (Fragment)                      | EBAG9        | 1 |
| IPI00386393 | CDNA FLJ13729 fis, clone PLACE3000121, weakly similar to VESICULAR TRAFFIC CO           | EXOC6B       | 1 |
| IPI00878511 | 45 kDa protein                                                                          | -            | 1 |
| IPI00816155 | Isoform 2 of Complement C1q-like protein 3 precursor                                    | C1QL3        | 1 |
| IPI00442564 | CDNA FLJ26948 fis, clone RCT08241                                                       | -            | 1 |
| IPI00412408 | Breast cancer type 2 susceptibility protein                                             | BRCA2        | 1 |
| IPI00008422 | Isoform 2 of SWI/SNF-related matrix-associated actin-dependent regulator of chromatin   | SMARCD1      | 1 |
| IPI00746177 | similar to Tubulin alpha-2 chain                                                        | LOC730222    | 1 |
| IPI00550792 | Isoform 1 of Bridging integrator 2                                                      | BIN2         | 1 |
| IPI00029175 | Strumpellin                                                                             | KIAA0196     | 1 |
| IPI00045360 | Capicua-like protein/double homeodomain 4 fusion protein                                | CIC          | 1 |
| IPI00001755 | Glypican-6 precursor                                                                    | GPC6         | 1 |
| IPI00749171 | Conserved hypothetical protein                                                          | LOC340184    | 1 |
| IPI00033419 | Protein Fem-1 homolog b                                                                 | FEM1B        | 1 |
| IPI00170635 | Secreted and transmembrane protein 1 precursor                                          | SECTM1       | 1 |
| IPI00830018 | Uncharacterized protein ENSP00000374807                                                 | -            | 1 |
| IPI00026230 | Heterogeneous nuclear ribonucleoprotein H2                                              | HNRPH2       | 1 |
| IPI00009365 | COX16-like protein C14orf112, mitochondrial precursor                                   | C14orf112    | 1 |
| IPI00445278 | CDNA FLJ44033 fis, clone TEST14028062                                                   | -            | 1 |
| IPI00644840 | Hypothetical protein                                                                    | LOC255783    | 1 |
| IPI00301098 | Uncharacterized protein C1orf187 precursor                                              | C1orf187     | 1 |
| IPI00009771 | Lamin-B2                                                                                | LMNB2        | 1 |
| IPI00444842 | CDNA FLJ45125 fis, clone BRAWH3036561                                                   | -            | 1 |
| IPI00023152 | Isoform 1 of N-acetylated-alpha-linked acidic dipeptidase-like protein                  | NAALADL1     | 1 |
| IPI00296727 | Kinesin-like protein KIF2B                                                              | KIF2B        | 1 |
| IPI00005347 | Zinc finger Ran-binding domain-containing protein 1                                     | ZRANB1       | 1 |
| IPI00470913 | RANBP2-like and GRIP domain containing 1                                                | RGPD1;RGPD2  | 1 |
| IPI00023407 | Nck-associated protein 1-like                                                           | NCKAP1L      | 1 |
| IPI00306046 | Isoform 1 of EGF-like repeat and discoidin I-like domain-containing protein 3 precursor | EDIL3        | 1 |
| IPI00445315 | Protein FAM47C                                                                          | FAM47C       | 1 |

|             |                                                                                    |           |   |
|-------------|------------------------------------------------------------------------------------|-----------|---|
| IPI00065931 | Isoform 2 of A-kinase anchor protein 13                                            | AKAP13    | 1 |
| IPI00149044 | Isoform 2 of Suppressor of hairy wing homolog 4                                    | ZNF280D   | 1 |
| IPI00007834 | Isoform 1 of Ankyrin-2                                                             | ANK2      | 1 |
| IPI00003971 | Isoform RTN1-A of Reticulon-1                                                      | RTN1      | 1 |
| IPI00746681 | Similar to Bcl-2-related ovarian killer protein                                    | -         | 1 |
| IPI00383808 | Ig kappa chain V-IV region STH (Fragment)                                          | -         | 1 |
| IPI00871556 | 107 kDa protein                                                                    | ZFYVE28   | 1 |
| IPI00746666 | hypothetical protein                                                               | LOC728262 | 1 |
| IPI00003814 | Isoform 1 of Dual specificity mitogen-activated protein kinase kinase 6            | MAP2K6    | 1 |
| IPI00245940 | immunoglobulin superfamily 5 like                                                  | IGSF5     | 1 |
| IPI00657699 | Protein                                                                            | MUC19     | 1 |
| IPI00290094 | Splicing factor, arginine/serine-rich 8                                            | SFRS8     | 1 |
| IPI00413826 | similar to H3 histone, family 3B                                                   | LOC644914 | 1 |
| IPI00030706 | Activator of 90 kDa heat shock protein ATPase homolog 1                            | AHSA1     | 1 |
| IPI00410093 | coiled-coil domain containing 69                                                   | CCDC69    | 1 |
| IPI00168404 | Zinc finger and BTB domain containing 34                                           | ZBTB34    | 1 |
| IPI00644766 | cDNA FLJ78048, highly similar to Homo sapiens torsin A interacting protein 1, mRNA | TOR1AIP1  | 1 |
| IPI00167154 | Uncharacterized protein MAPKBP1                                                    | MAPKBP1   | 1 |
| IPI00871533 | Uncharacterized protein C3orf48 (Fragment)                                         | C3orf48   | 1 |
| IPI00877615 | 15 kDa protein                                                                     | -         | 1 |
| IPI00030352 | Isoform 2 of Growth inhibition and differentiation-related protein 88              | C10orf28  | 1 |
| IPI00221080 | Isoform 2 of Parathyroid hormone-related protein precursor                         | PTH1H     | 1 |
| IPI00032338 | kelch-like 20                                                                      | KLHL20    | 1 |
| IPI00293679 | Isoform 1 of Potassium voltage-gated channel subfamily KQT member 4                | KCNQ4     | 1 |
| IPI00152769 | Isoform 1 of Trpc4-associated protein                                              | TRPC4AP   | 1 |
| IPI00748682 | Pheromone shutdown-related, TraB family protein                                    | -         | 1 |
| IPI00019888 | Succinate-semialdehyde dehydrogenase, mitochondrial precursor                      | ALDH5A1   | 1 |
| IPI00291987 | Insulin-like growth factor-binding protein-like 1 precursor                        | IGFBPL1   | 1 |
| IPI00170766 | Isoform 2 of Protein CASC5                                                         | CASC5     | 1 |
| IPI00032597 | RNA-binding motif protein, X-linked 2                                              | RBMX2     | 1 |
| IPI00783855 | neighbor of BRCA1 gene 1                                                           | NBR1      | 1 |
| IPI00746987 | Ribosomal protein S1 family protein                                                | -         | 1 |
| IPI00295469 | Copine-6                                                                           | CPNE6     | 1 |
| IPI00044326 | Carbohydrate sulfotransferase 14                                                   | CHST14    | 1 |
| IPI00884004 | Rheumatoid factor RF-ET12 (Fragment)                                               | -         | 1 |
| IPI00478997 | V5-6 protein                                                                       | IGLV4-69  | 1 |
| IPI00456599 | hypothetical protein LOC84792                                                      | MGC12966  | 1 |
| IPI00607831 | PRAME family member 3                                                              | PRAMEF3   | 1 |
| IPI00399254 | Isoform 1 of OTU domain-containing protein 4                                       | OTUD4     | 1 |
| IPI00171230 | Isoform 2 of ELKS/RAB6-interacting/CAST family member 1                            | ERC1      | 1 |

|             |                                                                              |           |   |
|-------------|------------------------------------------------------------------------------|-----------|---|
| IPI00719505 | RABL2A protein                                                               | RABL2A    | 1 |
| IPI00784880 | Cancer/testis antigen 75                                                     | LOC440934 | 1 |
| IPI00741005 | similar to MAX-interacting protein isoform 4                                 | MGA       | 1 |
| IPI00884353 | Ets-1 transcript variant ets-1 delta                                         | -         | 1 |
| IPI00852725 | Isoform 7 of Prolactin receptor precursor                                    | PRLR      | 1 |
| IPI00005600 | Isoform 1 of Bifunctional heparan sulfate N-deacetylase/N-sulfotransferase 2 | NDST2     | 1 |
| IPI00791593 | 8 kDa protein                                                                | GLYCAM1   | 1 |
| IPI00293396 | adaptor-related protein complex 1, gamma 1 subunit isoform a                 | AP1G1     | 1 |
| IPI00018914 | Tyrosine-protein phosphatase non-receptor type 14                            | PTPN14    | 1 |
| IPI00185146 | Importin-9                                                                   | IPO9      | 1 |
| IPI00143753 | Isoform 1 of U2-associated protein SR140                                     | SR140     | 1 |
| IPI00217791 | Coiled-coil domain-containing protein 105                                    | CCDC105   | 1 |
| IPI00167006 | Uncharacterized protein C13orf26                                             | C13orf26  | 1 |
| IPI00028481 | Ras-related protein Rab-8A                                                   | RAB8A     | 1 |
| IPI00294215 | Uncharacterized protein KIAA0232                                             | KIAA0232  | 1 |
| IPI00027806 | Cysteine-rich secretory protein LCCL domain-containing 1 precursor           | CRISPLD1  | 1 |
| IPI00071185 | Isoform SV1 of PITSLRE serine/threonine-protein kinase CDC2L1                | CDC2L1    | 1 |
| IPI00166776 | Protein CREG2 precursor                                                      | CREG2     | 1 |
| IPI00853400 | Isoform 1 of FK506-binding protein 15                                        | FKBP15    | 1 |
| IPI00473033 | Isoform 1 of Zinc finger protein 69                                          | ZNF69     | 1 |
| IPI00749245 | Secreted frizzled-related protein 1 precursor                                | SFRP1     | 1 |
| IPI00152182 | Isoform 1 of Kelch domain-containing protein 4                               | KLHDC4    | 1 |
| IPI00783604 | EPH receptor A6 isoform a                                                    | EPHA6     | 1 |
| IPI00456969 | Dynein heavy chain, cytosolic                                                | DYNC1H1   | 1 |
| IPI00001796 | Tumor necrosis factor receptor superfamily, member 18 (Fragment)             | TNFRSF18  | 1 |
| IPI00549972 | LIM domain-containing protein 2                                              | LIMD2     | 1 |
| IPI00604551 | Isoform 1 of Cell division cycle-associated protein 7                        | CDCA7     | 1 |
| IPI00470468 | Isoform 3 of Protein EFR3 homolog A                                          | EFR3A     | 1 |
| IPI00382515 | CDNA FLJ30384 fis, clone BRACE2008114                                        | -         | 1 |
| IPI00853312 | Uncharacterized protein ENSP00000324580                                      | -         | 1 |
| IPI00644191 | 70 kDa protein                                                               | ZNF90     | 1 |
| IPI00470490 | Isoform 1 of Nuclear receptor coactivator 1                                  | NCOA1     | 1 |
| IPI00001433 | Protocadherin beta 15 precursor                                              | PCDHB15   | 1 |
| IPI00220156 | Isoform B of Transforming growth factor beta-2 precursor                     | TGFB2     | 1 |
| IPI00024818 | Isoform 1 of Ubiquitin-specific peptidase-like protein 1                     | USPL1     | 1 |
| IPI00335437 | Ankyrin repeat and zinc finger domain-containing protein 1                   | ANKZF1    | 1 |
| IPI00000076 | Beta-nerve growth factor precursor                                           | NGFB      | 1 |
| IPI00290078 | keratin 4                                                                    | KRT4      | 1 |
| IPI00100980 | EH domain-containing protein 2                                               | EHD2      | 1 |
| IPI00328361 | Seryl-tRNA synthetase, mitochondrial precursor                               | SARS2     | 1 |

|             |                                                                                    |           |   |
|-------------|------------------------------------------------------------------------------------|-----------|---|
| IPI00022277 | Coiled-coil domain-containing protein 56                                           | CCDC56    | 1 |
| IPI00216288 | Isoform 3 of Lethal                                                                | L3MBTL    | 1 |
| IPI00025499 | Isoform Tau-F of Microtubule-associated protein tau                                | MAPT      | 1 |
| IPI00030757 | Isoform LpNPI of ADAMTS-2 precursor                                                | ADAMTS2   | 1 |
| IPI00787083 | similar to peptidylprolyl isomerase A isoform 1                                    | LOC256374 | 1 |
| IPI00856012 | collagen type VI alpha 6                                                           | COL6A6    | 1 |
| IPI00001712 | Isoform 1 of Catenin alpha-3                                                       | CTNNA3    | 1 |
| IPI00216592 | Isoform C1 of Heterogeneous nuclear ribonucleoproteins C1/C2                       | HNRNPC    | 1 |
| IPI00217831 | Ankyrin repeat domain-containing protein 13A                                       | ANKRD13A  | 1 |
| IPI00030037 | Agouti-signaling protein precursor                                                 | ASIP      | 1 |
| IPI00013749 | Protein kinase C zeta type                                                         | PRKCZ     | 1 |
| IPI00645078 | Ubiquitin-like modifier-activating enzyme 1                                        | UBA1      | 1 |
| IPI00395866 | SCUBE1 protein                                                                     | SCUBE1    | 1 |
| IPI00240793 | Probable phospholipid-transporting ATPase IF                                       | ATP11B    | 1 |
| IPI00376237 | Isoform 2 of Transcription factor LBX2                                             | LBX2      | 1 |
| IPI00847723 | Similar to VH4 heavy chain variable region precursor                               | -         | 1 |
| IPI00169115 | Olfactory receptor OR9-8                                                           | OR13C3    | 1 |
| IPI00020966 | Isoform 1 of Phosphatidylinositol N-acetylglucosaminyltransferase subunit A        | PIGA      | 1 |
| IPI00456827 | Protein FAM22G precursor                                                           | FAM22G    | 1 |
| IPI00747657 | Similar to Rod cGMP-specific 3',5'-cyclic phosphodiesterase subunit beta precursor | PDE6B     | 1 |
| IPI00215777 | Isoform B of Phosphate carrier protein, mitochondrial precursor                    | SLC25A3   | 1 |
| IPI00028912 | zinc finger protein 161                                                            | VEZF1     | 1 |
| IPI00003807 | Lysosomal acid phosphatase precursor                                               | ACP2      | 1 |
| IPI00830107 | V4-2 protein                                                                       | IGLV5-45  | 1 |
| IPI00019242 | Matrix metalloproteinase-15 precursor                                              | MMP15     | 1 |
| IPI00786946 | similar to Tektin-3                                                                | LOC642249 | 1 |
| IPI00166257 | CDNA FLJ37614 fis, clone BRCOC2011769                                              | -         | 1 |
| IPI00011592 | Cytoplasmic dynein 1 light intermediate chain 2                                    | DYNC1LI2  | 1 |
| IPI00442745 | CDNA FLJ26780 fis, clone PRS03837                                                  | -         | 1 |
| IPI00374301 | hypothetical protein                                                               | -         | 1 |
| IPI00024920 | ATP synthase subunit delta, mitochondrial precursor                                | ATP5D     | 1 |
| IPI00026262 | Isoform 1 of Ras GTPase-activating protein 1                                       | RASA1     | 1 |
| IPI00018843 | Isoform 1 of D(3) dopamine receptor                                                | DRD3      | 1 |
| IPI00027782 | Stromelysin-1 precursor                                                            | MMP3      | 1 |
| IPI00030009 | Isoform A of Bifunctional 3'-phosphoadenosine 5'-phosphosulfate synthetase 2       | PAPSS2    | 1 |
| IPI00177878 | Isoform 3 of Transmembrane protein 16D                                             | TMEM16D   | 1 |
| IPI00104907 | Isoform 1 of Uncharacterized potential DNA-binding protein C14orf106               | C14orf106 | 1 |
| IPI00827978 | VL4 protein (Fragment)                                                             | -         | 1 |
| IPI00005107 | Niemann-Pick C1 protein precursor                                                  | NPC1      | 1 |
| IPI00152216 | Isoform 1 of Protein RIC-3 precursor                                               | RIC3      | 1 |



|             |                                                                                      |              |   |
|-------------|--------------------------------------------------------------------------------------|--------------|---|
| IPI00028520 | Isoform 1 of NADH dehydrogenase [ubiquinone] flavoprotein 1, mitochondrial precursor | NDUFV1       | 1 |
| IPI00290358 | Putative uncharacterized protein gs103                                               | LOC283951    | 1 |
| IPI00013272 | Isoform 1 of Golgin subfamily A member 4                                             | GOLGA4       | 1 |
| IPI00009070 | Isoform 1 of HBS1-like protein                                                       | HBS1L        | 1 |
| IPI00386576 | Ig lambda chain V-IV region MOL                                                      | -            | 1 |
| IPI00022295 | Platelet factor 4 variant precursor                                                  | PF4V1        | 1 |
| IPI00747420 | Melanoma-derived protein (Fragment)                                                  | -            | 1 |
| IPI00432226 | AVLL5809                                                                             | -            | 1 |
| IPI00171874 | Ras guanyl-releasing protein 3                                                       | RASGRP3      | 1 |
| IPI00165229 | proprotein convertase subtilisin/kexin type 5 preproprotein                          | PCSK5        | 1 |
| IPI00006746 | Ermin                                                                                | ERMN         | 1 |
| IPI00178894 | Zinc finger and BTB domain-containing protein 20                                     | ZBTB20       | 1 |
| IPI00878436 | 24 kDa protein                                                                       | SLC2A11      | 1 |
| IPI00640810 | 6 kDa protein                                                                        | CTDP1        | 1 |
| IPI00845229 | Isoform 2 of DEP domain-containing protein 2                                         | DEPDC2       | 1 |
| IPI00306549 | CDNA FLJ11065 fis, clone PLACE1004868, weakly similar to MALE STERILITY PROTEIN      | MLSTD1       | 1 |
| IPI00003392 | Transmembrane protein 5                                                              | TMEM5        | 1 |
| IPI00293361 | Isoform 2 of Small G protein signaling modulator 2                                   | SGSM2        | 1 |
| IPI00827788 | VH-3 family (VH26)D/J protein (Fragment)                                             | -            | 1 |
| IPI00253281 | Isoform 2 of Epidermal growth factor receptor kinase substrate 8-like protein 1      | EPS8L1       | 1 |
| IPI00005607 | Isoform 1 of Deleted in bladder cancer protein 1 precursor                           | DBC1         | 1 |
| IPI00014371 | Cadherin-18 precursor                                                                | CDH18        | 1 |
| IPI00329605 | DNA mismatch repair protein Msh3                                                     | MSH3         | 1 |
| IPI00032425 | Receptor activity-modifying protein 3 precursor                                      | RAMP3        | 1 |
| IPI00300020 | Excitatory amino acid transporter 2                                                  | SLC1A2       | 1 |
| IPI00001568 | Vacuolar proton pump subunit D                                                       | ATP6V1D      | 1 |
| IPI00020470 | Isoform 1 of Glycosyltransferase 8 domain-containing protein 1                       | GLT8D1       | 1 |
| IPI00718821 | Isoform 1 of Uncharacterized protein C19orf55                                        | C19orf55     | 1 |
| IPI00018387 | Furin precursor                                                                      | FURIN        | 1 |
| IPI00398229 | similar to deubiquitinating enzyme 3                                                 | LOC392197    | 1 |
| IPI00027248 | Tumor suppressor candidate 2                                                         | TUSC2        | 1 |
| IPI00438286 | Isoform 1 of Protein LAP2                                                            | ERBB2IP      | 1 |
| IPI00023780 | Isoform 2 of DnaJ homolog subfamily C member 5                                       | DNAJC5       | 1 |
| IPI00018027 | Isoform 1 of Angiogenic factor with G patch and FHA domains 1                        | AGGF1        | 1 |
| IPI00434711 | Putative uncharacterized protein FP6679                                              | -            | 1 |
| IPI00009881 | Neuroendocrine secretory protein 55                                                  | GNAS         | 1 |
| IPI00020329 | Potassium voltage-gated channel subfamily S member 2                                 | KCNS2        | 1 |
| IPI00243451 | Liver-specific organic anion transporter 3TM12                                       | SLCO1B3;LST- | 1 |
| IPI00184650 | Class B basic helix-loop-helix protein 4                                             | BHLHB4       | 1 |
| IPI00328298 | Isoform 2 of Structural maintenance of chromosomes protein 4                         | SMC4         | 1 |

|             |                                                                                |           |   |
|-------------|--------------------------------------------------------------------------------|-----------|---|
| IPI00386284 | olfactory receptor, family 2, subfamily AK, member 2                           | OR2AK2    | 1 |
| IPI00289329 | Ephrin type-B receptor 3 precursor                                             | EPHB3     | 1 |
| IPI00018429 | Paired mesoderm homeobox protein 2                                             | PRRX2     | 1 |
| IPI00032904 | Beta-synuclein                                                                 | SNCB      | 1 |
| IPI00424119 | Frizzled-3 precursor                                                           | FZD3      | 1 |
| IPI00387004 | PNAS-146                                                                       | MCM7      | 1 |
| IPI00218946 | Potassium/sodium hyperpolarization-activated cyclic nucleotide-gated channel 2 | HCN2      | 1 |
| IPI00024766 | Plexin-C1 precursor                                                            | PLXNC1    | 1 |
| IPI00009471 | WD repeat-containing protein 3                                                 | WDR3      | 1 |
| IPI00455967 | Uncharacterized protein ENSP00000353619 (Fragment)                             | -         | 1 |
| IPI00186966 | Isoform IIA of Myc box-dependent-interacting protein 1                         | BIN1      | 1 |
| IPI00045939 | 2-aminoethanethiol dioxygenase                                                 | ADO       | 1 |
| IPI00165009 | Isoform 3 of MBT domain-containing protein 1                                   | MBTD1     | 1 |
| IPI00374670 | hypothetical protein isoform 2                                                 | LOC388588 | 1 |
| IPI00289837 | Coiled-coil domain-containing protein 85A                                      | CCDC85A   | 1 |
| IPI00027264 | Calretinin                                                                     | CALB2     | 1 |
| IPI00878962 | 10 kDa protein                                                                 | -         | 1 |
| IPI00103891 | Putative uncharacterized protein                                               | MTMR14    | 1 |
| IPI00328709 | Gremlin-2 precursor                                                            | GREM2     | 1 |
| IPI00398154 | actin filament associated protein 1                                            | AFAP1     | 1 |
| IPI00291939 | Structural maintenance of chromosomes protein 1A                               | SMC1A     | 1 |
| IPI00444272 | Leukemia inhibitory factor receptor precursor                                  | LIFR      | 1 |
| IPI00641181 | MARCKS-related protein                                                         | MARCKSL1  | 1 |
| IPI00418125 | Isoform 1 of Layilin precursor                                                 | LAYN      | 1 |
| IPI00151990 | Isoform 1 of Thioredoxin domain-containing protein 15 precursor                | TXNDC15   | 1 |
| IPI00024272 | Integral membrane protein DGCR2/IDD precursor                                  | DGCR2     | 1 |
| IPI00003384 | Isoform 1 of Cadherin EGF LAG seven-pass G-type receptor 1 precursor           | CELSR1    | 1 |
| IPI00657936 | collagen, type XXVIII precursor                                                | COL28A1   | 1 |
| IPI00329593 | Isoform 2 of ADP-dependent glucokinase                                         | ADPGK     | 1 |
| IPI00296461 | Isoform 1 of Sphingomyelin phosphodiesterase precursor                         | SMPD1     | 1 |
| IPI00376383 | Centrosomal protein 110kDa                                                     | CEP110    | 1 |
| IPI00015973 | Band 4.1-like protein 2                                                        | EPB41L2   | 1 |
| IPI00304789 | 27 kDa protein                                                                 | TTLL9     | 1 |
| IPI00792759 | 73 kDa protein                                                                 | THSD4     | 1 |
| IPI00446588 | Isoform 2 of Plexin-A4 precursor                                               | PLXNA4    | 1 |
| IPI00419836 | Isoform 1 of Discoidin, CUB and LCCL domain-containing protein 2 precursor     | DCBLD2    | 1 |
| IPI00217435 | Signal peptide, CUB and EGF-like domain-containing protein 1 precursor         | SCUBE1    | 1 |
| IPI00021766 | Isoform 1 of Reticulon-4                                                       | RTN4      | 1 |
| IPI00221006 | Isoform 4 of Transcription factor 7-like 2                                     | TCF7L2    | 1 |

√ detected in proteomic data  
√\* detected in peptidomic data
