# Supplementary material for: Establishing the Proteome of Normal Human Cerebrospinal Fluid
Source: PubMed Central journal article supplement (PMC2881861; doi:10.1371/journal.pone.0010980), 2010-06-11
Supplement: pone.0010980.s010.pdf [file pone.0010980.s010.pdf]

**Supplementary Table 3. Proteins identified and quantified from direct LC-MS analysis of CSF from non-neurologic and neurologic (headache) surrogate-normals.**

| IPI         | Protein Name                                           | Gene      | unique peptide count | p-value  | q-value  | average fold change |
|-------------|--------------------------------------------------------|-----------|----------------------|----------|----------|---------------------|
| IPI00410714 | Hemoglobin subunit alpha                               | HBA2;HBA1 | 16                   | 4.96E-05 | 2.27E-03 | 14.58               |
| IPI00654755 | Hemoglobin subunit beta                                | HBB       | 7                    | 8.63E-05 | 2.27E-03 | 8.93                |
| IPI00654755 | Hemoglobin subunit delta                               | HBB;HBD   | 7                    | 1.10E-04 | 2.27E-03 | 17.46               |
| IPI00021000 | Isoform A of Osteopontin precursor                     | SPP1      | 10                   | 1.25E-04 | 2.27E-03 | 50.56               |
| IPI00298497 | Fibrinogen beta chain precursor                        | FGB       | 10                   | 2.07E-04 | 2.94E-03 | 0.65                |
| IPI00008944 | Isoform 1 of Neuroendocrine protein 7B2 precursor      | SCG5      | 4                    | 2.44E-04 | 2.94E-03 | 5.35                |
| IPI00022488 | Hemopexin precursor                                    | HPX       | 25                   | 3.89E-04 | 4.01E-03 | 1.53                |
| IPI00410714 | Hemoglobin subunit zeta                                | HBZ       | 2                    | 1.46E-03 | 1.32E-02 | 7.96                |
| IPI00026314 | Isoform 1 of Gelsolin precursor                        | GSN       | 53                   | 2.36E-03 | 1.90E-02 | 2.17                |
| IPI00069058 | VGF nerve growth factor inducible precursor            | VGF       | 20                   | 3.34E-03 | 2.41E-02 | 6.79                |
| IPI00292071 | Secretogranin-3 precursor                              | SCG3      | 23                   | 3.84E-03 | 2.53E-02 | 1.78                |
| IPI00384697 | Uncharacterized protein ALB                            | ALB       | 83                   | 5.28E-03 | 2.84E-02 | 1.58                |
| IPI00296537 | Isoform C of Fibulin-1 precursor                       | FBLN1     | 4                    | 5.39E-03 | 2.84E-02 | 1.73                |
| IPI00029863 | SERPINF2 protein                                       | SERPINF2  | 14                   | 5.50E-03 | 2.84E-02 | 2.75                |
| IPI00022417 | Leucine-rich alpha-2-glycoprotein precursor            | LRG1      | 6                    | 6.69E-03 | 2.86E-02 | 0.55                |
| IPI00641737 | Isoform 1 of Haptoglobin-related protein precursor     | HPR       | 7                    | 6.99E-03 | 2.86E-02 | 2.37                |
| IPI00102543 | SLIT and NTRK-like protein 1 precursor                 | SLITRK1   | 3                    | 7.00E-03 | 2.86E-02 | 0.06                |
| IPI00553177 | PRO2275                                                | SERPINA1  | 33                   | 7.11E-03 | 2.86E-02 | 1.93                |
| IPI00334238 | neuronal pentraxin receptor                            | NPTXR     | 8                    | 7.77E-03 | 2.96E-02 | 0.70                |
| IPI00032179 | Antithrombin III variant                               | SERPINC1  | 25                   | 8.29E-03 | 3.00E-02 | 1.48                |
| IPI00784810 | FLJ00385 protein (Fragment)                            | IGHM      | 23                   | 9.02E-03 | 3.10E-02 | 1.67                |
| IPI00305461 | Inter-alpha-trypsin inhibitor heavy chain H2 precursor | ITIH2     | 16                   | 9.66E-03 | 3.17E-02 | 1.52                |
| IPI00550991 | Alpha-1-antichymotrypsin precursor                     | SERPINA3  | 35                   | 1.20E-02 | 3.77E-02 | 5.29                |
| IPI00746813 | Chromogranin-A precursor                               | CHGA      | 14                   | 1.30E-02 | 3.93E-02 | 12.61               |
| IPI00853525 | Apolipoprotein A-I precursor                           | APOA1     | 49                   | 1.44E-02 | 4.16E-02 | 1.42                |
| IPI00456623 | Isoform 1 of Brevican core protein precursor           | BCAN      | 3                    | 1.51E-02 | 4.21E-02 | 6.07                |
| IPI00006114 | Pigment epithelium-derived factor precursor            | SERPINF1  | 33                   | 1.69E-02 | 4.51E-02 | 1.41                |
| IPI00742696 | vitamin D-binding protein precursor                    | GC        | 2                    | 1.75E-02 | 4.51E-02 | 1.55                |
| IPI00019399 | Serum amyloid A-4 protein precursor                    | SAA4      | 3                    | 2.21E-02 | 5.50E-02 | 2.06                |
| IPI00021891 | Isoform Gamma-B of Fibrinogen gamma chain precursor    | FGG       | 7                    | 2.61E-02 | 6.30E-02 | 0.70                |
| IPI00418163 | C4B1                                                   | C4B       | 10                   | 2.82E-02 | 6.43E-02 | 1.82                |
| IPI00299059 | precursor                                              | CHL1      | 19                   | 2.85E-02 | 6.43E-02 | 1.40                |

|             |                                                                |          |    |          |          |      |
|-------------|----------------------------------------------------------------|----------|----|----------|----------|------|
| IPI00025426 | Pregnancy zone protein precursor                               | PZP      | 7  | 3.47E-02 | 7.59E-02 | 1.40 |
| IPI00027827 | Extracellular superoxide dismutase [Cu-Zn] precursor           | SOD3     | 7  | 3.74E-02 | 7.94E-02 | 1.56 |
| IPI00013303 | Limbic system-associated membrane protein precursor            | LSAMP    | 8  | 4.50E-02 | 8.98E-02 | 2.30 |
| IPI00304273 | Apolipoprotein A-IV precursor                                  | APOA4    | 35 | 4.52E-02 | 8.98E-02 | 1.35 |
| IPI00167093 | Complement factor H-related protein 1 precursor                | CFHR1    | 2  | 4.67E-02 | 8.98E-02 | 0.26 |
| IPI00007257 | calsyntenin 1 isoform 2                                        | CLSTN1   | 14 | 4.78E-02 | 8.98E-02 | 1.33 |
| IPI00022229 | Apolipoprotein B-100 precursor                                 | APOB     | 2  | 4.94E-02 | 8.98E-02 | 1.66 |
| IPI00011218 | Macrophage colony-stimulating factor 1 receptor precursor      | CSF1R    | 3  | 4.97E-02 | 8.98E-02 | 1.57 |
| IPI00022429 | Alpha-1-acid glycoprotein 1 precursor                          | ORM1     | 9  | 5.09E-02 | 8.98E-02 | 1.44 |
| IPI00006601 | Secretogranin-1 precursor                                      | CHGB     | 40 | 5.24E-02 | 8.98E-02 | 3.86 |
| IPI00016915 | Insulin-like growth factor-binding protein 7 precursor         | IGFBP7   | 7  | 5.53E-02 | 8.98E-02 | 1.62 |
| IPI00784589 | IGL@ protein                                                   | IGL@     | 16 | 5.63E-02 | 8.98E-02 | 1.36 |
| IPI00013179 | Prostaglandin-H2 D-isomerase precursor                         | PTGDS    | 28 | 5.69E-02 | 8.98E-02 | 1.33 |
| IPI00334282 | Protein FAM3C precursor                                        | FAM3C    | 8  | 5.72E-02 | 8.98E-02 | 1.49 |
| IPI00641737 | HP protein                                                     | HP       | 13 | 5.99E-02 | 9.21E-02 | 1.37 |
| IPI00021857 | Apolipoprotein C-III precursor                                 | APOC3    | 3  | 6.24E-02 | 9.25E-02 | 1.39 |
| IPI00017601 | Ceruloplasmin precursor                                        | CP       | 34 | 6.30E-02 | 9.25E-02 | 1.44 |
| IPI00019568 | Prothrombin precursor (Fragment)                               | F2       | 7  | 6.40E-02 | 9.25E-02 | 1.65 |
| IPI00845354 | IGKV1-5 protein                                                | IGKV1-5  | 8  | 6.55E-02 | 9.28E-02 | 1.71 |
| IPI00006662 | Apolipoprotein D precursor                                     | APOD     | 9  | 6.79E-02 | 9.44E-02 | 0.85 |
| IPI00217778 | Isoform 2 of Phospholipid transfer protein precursor           | PLTP     | 2  | 7.37E-02 | 1.01E-01 | 0.56 |
| IPI00296777 | SPARC-like protein 1 precursor                                 | SPARCL1  | 13 | 7.81E-02 | 1.04E-01 | 1.55 |
| IPI00166729 | alpha-2-glycoprotein 1, zinc                                   | AZGP1    | 9  | 7.92E-02 | 1.04E-01 | 0.81 |
| IPI00296534 | Isoform D of Fibulin-1 precursor                               | FBLN1    | 2  | 8.09E-02 | 1.04E-01 | 2.08 |
| IPI00426051 | Putative uncharacterized protein DKFZp686I04196 (Fragment)     | IGHG2    | 9  | 8.74E-02 | 1.10E-01 | 1.53 |
| IPI00015260 | Protein kinase C-binding protein NELL2 precursor               | NELL2    | 10 | 8.79E-02 | 1.10E-01 | 1.53 |
| IPI00019580 | Plasminogen precursor                                          | PLG      | 11 | 9.07E-02 | 1.11E-01 | 1.50 |
| IPI00451624 | Isoform 1 of Cartilage acidic protein 1 precursor              | CRTAC1   | 9  | 9.43E-02 | 1.12E-01 | 1.54 |
| IPI00004656 | Beta-2-microglobulin                                           | B2M      | 6  | 9.47E-02 | 1.12E-01 | 0.39 |
| IPI00009997 | N-acetyllactosaminide beta-1,3-N-acetylglucosaminyltransferase | B3GNT1   | 16 | 9.97E-02 | 1.16E-01 | 0.68 |
| IPI00294004 | Vitamin K-dependent protein S precursor                        | PROS1    | 5  | 1.05E-01 | 1.20E-01 | 1.46 |
| IPI00783987 | Complement C3 precursor (Fragment)                             | C3       | 99 | 1.08E-01 | 1.22E-01 | 1.34 |
| IPI00296534 | Isoform B of Fibulin-1 precursor                               | FBLN1    | 6  | 1.10E-01 | 1.22E-01 | 1.35 |
| IPI00795918 | isoform precursor                                              | NCAM1    | 10 | 1.16E-01 | 1.25E-01 | 1.49 |
| IPI00291262 | Clusterin precursor                                            | CLU      | 42 | 1.16E-01 | 1.25E-01 | 0.74 |
| IPI00022463 | Serotransferrin precursor                                      | TF       | 57 | 1.18E-01 | 1.26E-01 | 1.22 |
| IPI00156171 | family member 2 precursor                                      | ENPP2    | 18 | 1.20E-01 | 1.26E-01 | 1.36 |
| IPI00844156 | SERPINC1 protein                                               | SERPINC1 | 5  | 1.27E-01 | 1.31E-01 | 1.47 |

|             |                                                                     |          |    |          |          |      |
|-------------|---------------------------------------------------------------------|----------|----|----------|----------|------|
| IPI00032293 | Cystatin-C precursor                                                | CST3     | 30 | 1.30E-01 | 1.31E-01 | 1.27 |
| IPI00019591 | Isoform 1 of Complement factor B precursor (Fragment)               | CFB      | 27 | 1.31E-01 | 1.31E-01 | 1.29 |
| IPI00219217 | L-lactate dehydrogenase B chain                                     | LDHB     | 3  | 1.33E-01 | 1.32E-01 | 3.28 |
| IPI00022432 | Transthyretin precursor                                             | TTR      | 25 | 1.38E-01 | 1.34E-01 | 1.97 |
| IPI00477992 | complement component 1, q subcomponent, B chain precursor           | C1QB     | 3  | 1.42E-01 | 1.34E-01 | 2.16 |
| IPI00301579 | Epididymal secretory protein E1 precursor                           | NPC2     | 3  | 1.43E-01 | 1.34E-01 | 1.30 |
| IPI00177543 | preproprotein                                                       | PAM      | 4  | 1.44E-01 | 1.34E-01 | 1.21 |
| IPI00218192 | Isoform 2 of Inter-alpha-trypsin inhibitor heavy chain H4 precursor | ITIH4    | 17 | 1.47E-01 | 1.34E-01 | 1.44 |
| IPI00220327 | Keratin, type II cytoskeletal 1                                     | KRT1     | 4  | 1.47E-01 | 1.34E-01 | 0.24 |
| IPI00385252 | Ig kappa chain V-III region HAH precursor                           | IGKV3-20 | 4  | 1.51E-01 | 1.34E-01 | 1.33 |
| IPI00296608 | Complement component C7 precursor                                   | C7       | 7  | 1.52E-01 | 1.34E-01 | 0.66 |
| IPI00022394 | Complement C1q subcomponent subunit C precursor                     | C1QC     | 3  | 1.52E-01 | 1.34E-01 | 0.85 |
| IPI00242956 | IgGFc-binding protein precursor                                     | FCGBP    | 2  | 1.54E-01 | 1.34E-01 | 0.36 |
| IPI00218733 | Superoxide dismutase                                                | SOD1     | 7  | 1.63E-01 | 1.40E-01 | 1.54 |
| IPI00418163 | Complement C4-A precursor                                           | C4A;C4B  | 79 | 1.77E-01 | 1.51E-01 | 1.26 |
| IPI00022431 | Alpha-2-HS-glycoprotein precursor                                   | AHSG     | 9  | 1.84E-01 | 1.54E-01 | 1.34 |
| IPI00784810 | Factor VII active site mutant immunoconjugate                       | F7       | 8  | 1.87E-01 | 1.56E-01 | 1.48 |
| IPI00028911 | Dystroglycan precursor                                              | DAG1     | 5  | 1.90E-01 | 1.56E-01 | 0.69 |
| IPI00478003 | Alpha-2-macroglobulin precursor                                     | A2M      | 52 | 1.94E-01 | 1.57E-01 | 1.31 |
| IPI00296165 | Complement C1r subcomponent precursor                               | CYP1     | 5  | 1.97E-01 | 1.58E-01 | 0.29 |
| IPI00024966 | Contactin-2 precursor                                               | CNTN2    | 5  | 2.01E-01 | 1.60E-01 | 4.16 |
| IPI00854806 | (Fragment)                                                          | IGKV1D-8 | 2  | 2.11E-01 | 1.65E-01 | 1.58 |
| IPI00022420 | Plasma retinol-binding protein precursor                            | RBP4     | 6  | 2.13E-01 | 1.65E-01 | 1.25 |
| IPI00020091 | Alpha-1-acid glycoprotein 2 precursor                               | ORM2     | 10 | 2.14E-01 | 1.65E-01 | 1.22 |
| IPI00031121 | Carboxypeptidase E precursor                                        | CPE      | 5  | 2.31E-01 | 1.76E-01 | 1.47 |
| IPI00023673 | Galectin-3-binding protein precursor                                | LGALS3BP | 6  | 2.35E-01 | 1.77E-01 | 1.29 |
| IPI00219446 | Phosphatidylethanolamine-binding protein 1                          | PEBP1    | 4  | 2.38E-01 | 1.77E-01 | 1.62 |
| IPI00064667 | Beta-Ala-His dipeptidase precursor                                  | CNDP1    | 27 | 2.52E-01 | 1.84E-01 | 0.82 |
| IPI00290085 | Cadherin-2 precursor                                                | CDH2     | 6  | 2.52E-01 | 1.84E-01 | 1.37 |
| IPI00023845 | Kallikrein-6 precursor                                              | KLK6     | 6  | 2.58E-01 | 1.87E-01 | 0.93 |
| IPI00742696 | Vitamin D-binding protein precursor                                 | GC       | 16 | 2.66E-01 | 1.89E-01 | 1.32 |
| IPI00180384 | dynein, axonemal, heavy chain 7                                     | DNAH7    | 2  | 2.67E-01 | 1.89E-01 | 2.28 |
| IPI00332887 | signal-regulatory protein alpha precursor                           | SIRPA    | 2  | 2.76E-01 | 1.94E-01 | 0.93 |
| IPI00006608 | Isoform APP770 of Amyloid beta A4 protein precursor (Fragment)      | APP      | 16 | 2.81E-01 | 1.95E-01 | 1.21 |
| IPI00022395 | Complement component C9 precursor                                   | C9       | 6  | 2.84E-01 | 1.95E-01 | 1.18 |
| IPI00025465 | Mimecan precursor                                                   | OGN      | 14 | 2.87E-01 | 1.96E-01 | 0.81 |
| IPI00027482 | Corticosteroid-binding globulin precursor                           | SERPINA6 | 3  | 2.91E-01 | 1.96E-01 | 1.79 |
| IPI00607600 | Amyloid-like protein 1 precursor                                    | APLP1    | 30 | 3.08E-01 | 2.06E-01 | 1.19 |

|             |                                                           |           |    |          |          |      |
|-------------|-----------------------------------------------------------|-----------|----|----------|----------|------|
| IPI00021842 | Apolipoprotein E precursor                                | APOE      | 50 | 3.15E-01 | 2.09E-01 | 1.13 |
| IPI00022892 | Thy-1 membrane glycoprotein precursor                     | THY1      | 2  | 3.32E-01 | 2.18E-01 | 0.74 |
| IPI00794070 | Complement factor I precursor                             | CFI       | 2  | 3.41E-01 | 2.22E-01 | 0.50 |
| IPI00415032 | Isoform 1 of Neuronal cell adhesion molecule precursor    | NRCAM     | 24 | 3.61E-01 | 2.33E-01 | 1.13 |
| IPI00291866 | Plasma protease C1 inhibitor precursor                    | SERPING1  | 15 | 3.69E-01 | 2.36E-01 | 0.84 |
| IPI00783987 | similar to Complement C3 precursor                        | LOC653879 | 11 | 3.80E-01 | 2.41E-01 | 1.79 |
| IPI00176221 | Neuronal growth regulator 1 precursor                     | NEGR1     | 3  | 3.83E-01 | 2.41E-01 | 1.75 |
| IPI00002714 | Dickkopf-related protein 3 precursor                      | DKK3      | 14 | 3.91E-01 | 2.44E-01 | 0.89 |
| IPI00442297 | Neurotrimin variant 3                                     | HNT       | 4  | 4.06E-01 | 2.51E-01 | 1.19 |
| IPI00384697 | ALB protein                                               | ALB       | 3  | 4.13E-01 | 2.53E-01 | 1.28 |
| IPI00003351 | Extracellular matrix protein 1 precursor                  | ECM1      | 6  | 4.17E-01 | 2.53E-01 | 1.32 |
| IPI00456623 | Hyaluronan binding protein (Fragment)                     | BCAN      | 4  | 4.30E-01 | 2.59E-01 | 0.72 |
| IPI00007921 | Isoform 1 of Neurexin-2-alpha precursor                   | NRXN2     | 4  | 4.40E-01 | 2.60E-01 | 1.48 |
| IPI00292530 | Inter-alpha-trypsin inhibitor heavy chain H1 precursor    | ITIH1     | 4  | 4.42E-01 | 2.60E-01 | 1.35 |
| IPI00163207 | Isoform 1 of N-acetylmuramoyl-L-alanine amidase precursor | PGLYRP2   | 6  | 4.43E-01 | 2.60E-01 | 0.68 |
| IPI00159927 | Neurocan core protein precursor                           | NCAN      | 4  | 4.67E-01 | 2.72E-01 | 0.69 |
| IPI00034319 | Isoform A of Protein CutA precursor                       | CUTA      | 2  | 4.85E-01 | 2.78E-01 | 0.86 |
| IPI00553177 | Isoform 1 of Alpha-1-antitrypsin precursor                | SERPINA1  | 35 | 4.87E-01 | 2.78E-01 | 1.17 |
| IPI00029751 | Isoform 1 of Contactin-1 precursor                        | CNTN1     | 19 | 4.90E-01 | 2.78E-01 | 1.28 |
| IPI00011261 | Complement component C8 gamma chain precursor             | C8G       | 2  | 4.93E-01 | 2.78E-01 | 1.18 |
| IPI00001611 | Isoform 1 of Insulin-like growth factor II precursor      | IGF2      | 2  | 5.08E-01 | 2.84E-01 | 0.88 |
| IPI00024284 | protein precursor                                         | HSPG2     | 6  | 5.11E-01 | 2.84E-01 | 1.18 |
| IPI00011229 | Cathepsin D precursor                                     | CTSD      | 9  | 5.18E-01 | 2.86E-01 | 1.20 |
| IPI00029260 | Monocyte differentiation antigen CD14 precursor           | CD14      | 4  | 5.22E-01 | 2.86E-01 | 0.88 |
| IPI00002147 | Chitinase-3-like protein 1 precursor                      | CHI3L1    | 8  | 5.45E-01 | 2.96E-01 | 1.46 |
| IPI00787781 | Metalloproteinase inhibitor 2 precursor                   | TIMP2     | 2  | 5.54E-01 | 2.98E-01 | 1.22 |
| IPI00332887 | RcPTPNS1 (Fragment)                                       | -         | 2  | 5.57E-01 | 2.98E-01 | 0.75 |
| IPI00297160 | Isoform 12 of CD44 antigen precursor                      | CD44      | 2  | 5.70E-01 | 3.01E-01 | 0.85 |
| IPI00291136 | Collagen alpha-1(VI) chain precursor                      | COL6A1    | 5  | 5.70E-01 | 3.01E-01 | 0.64 |
| IPI00414249 | Neurexin 3-alpha                                          | NRXN3     | 2  | 5.86E-01 | 3.04E-01 | 1.28 |
| IPI00382420 | Ig lambda chain V-I region HA                             | -         | 2  | 5.90E-01 | 3.04E-01 | 1.45 |
| IPI00026199 | Glutathione peroxidase 3 precursor                        | GPX3      | 2  | 5.91E-01 | 3.04E-01 | 0.82 |
| IPI00023814 | Isoform 1 of Neogenin precursor                           | NEO1      | 4  | 5.93E-01 | 3.04E-01 | 1.79 |
| IPI00021854 | Apolipoprotein A-II precursor                             | APOA2     | 10 | 6.18E-01 | 3.15E-01 | 1.12 |
| IPI00032328 | Isoform HMW of Kininogen-1 precursor                      | KNG1      | 11 | 6.43E-01 | 3.24E-01 | 1.09 |
| IPI00009362 | Secretogranin-2 precursor                                 | SCG2      | 13 | 6.45E-01 | 3.24E-01 | 0.90 |
| IPI00022371 | Histidine-rich glycoprotein precursor                     | HRG       | 7  | 6.78E-01 | 3.35E-01 | 1.10 |
| IPI00298971 | Vitronectin precursor                                     | VTN       | 9  | 6.81E-01 | 3.35E-01 | 1.11 |

|             |                                                                  |          |    |          |          |      |
|-------------|------------------------------------------------------------------|----------|----|----------|----------|------|
| IPI00008318 | Ephrin type-A receptor 4 precursor                               | EPHA4    | 4  | 6.82E-01 | 3.35E-01 | 1.09 |
| IPI00298828 | Beta-2-glycoprotein 1 precursor                                  | APOH     | 3  | 6.90E-01 | 3.37E-01 | 0.93 |
| IPI00029739 | Isoform 1 of Complement factor H precursor                       | CFH      | 12 | 7.07E-01 | 3.41E-01 | 1.05 |
| IPI00021885 | Isoform 1 of Fibrinogen alpha chain precursor                    | FGA      | 15 | 7.08E-01 | 3.41E-01 | 0.93 |
| IPI00020986 | Lumican precursor                                                | LUM      | 7  | 7.39E-01 | 3.53E-01 | 0.95 |
| IPI00029235 | Insulin-like growth factor-binding protein 6 precursor           | IGFBP6   | 2  | 7.42E-01 | 3.53E-01 | 1.09 |
| IPI00014964 | Lymphocyte antigen 6H precursor                                  | LY6H     | 2  | 7.53E-01 | 3.56E-01 | 1.23 |
| IPI00217778 | 45 kDa protein                                                   | PLTP     | 5  | 7.58E-01 | 3.56E-01 | 1.12 |
| IPI00012503 | Isoform Sap-mu-0 of Proactivator polypeptide precursor           | PSAP     | 3  | 7.72E-01 | 3.60E-01 | 0.80 |
| IPI00002280 | ProSAAS precursor                                                | PCSK1N   | 10 | 7.84E-01 | 3.62E-01 | 0.97 |
| IPI00792115 | Tetranectin precursor                                            | CLEC3B   | 5  | 7.86E-01 | 3.62E-01 | 1.05 |
| IPI00001662 | Opioid-binding protein/cell adhesion molecule precursor          | OPCML    | 4  | 7.98E-01 | 3.65E-01 | 0.95 |
| IPI00784119 | Vacuolar ATP synthase subunit S1 precursor                       | ATP6AP1  | 2  | 8.02E-01 | 3.65E-01 | 1.04 |
| IPI00017696 | Complement C1s subcomponent precursor                            | C1S      | 7  | 8.27E-01 | 3.73E-01 | 1.06 |
| IPI00029658 | 1 precursor                                                      | EFEMP1   | 8  | 8.32E-01 | 3.74E-01 | 0.93 |
| IPI00032220 | Angiotensinogen precursor                                        | AGT      | 22 | 8.54E-01 | 3.81E-01 | 0.97 |
| IPI00297646 | Collagen alpha-1(I) chain precursor                              | COL1A1   | 2  | 9.07E-01 | 4.01E-01 | 1.03 |
| IPI00022426 | AMBP protein precursor                                           | AMBP     | 2  | 9.17E-01 | 4.01E-01 | 0.94 |
| IPI00022895 | Alpha-1B-glycoprotein precursor                                  | A1BG     | 17 | 9.18E-01 | 4.01E-01 | 1.02 |
| IPI00292950 | Serpin peptidase inhibitor, clade D (Heparin cofactor), member 1 | SERPIND1 | 2  | 9.21E-01 | 4.01E-01 | 0.97 |
| IPI00022792 | Microfibril-associated glycoprotein 4 precursor                  | MFAP4    | 2  | 9.26E-01 | 4.01E-01 | 0.96 |
| IPI00022331 | Phosphatidylcholine-sterol acyltransferase precursor             | LCAT     | 4  | 9.33E-01 | 4.01E-01 | 1.04 |
| IPI00386879 | IGHA1 protein                                                    | 13;IGHA1 | 9  | 9.38E-01 | 4.01E-01 | 0.99 |
| IPI00019943 | Afamin precursor                                                 | AFM      | 9  | 9.48E-01 | 4.03E-01 | 0.97 |
| IPI00299738 | Procollagen C-endopeptidase enhancer 1 precursor                 | PCOLCE   | 2  | 9.65E-01 | 4.08E-01 | 1.02 |
| IPI00004440 | Receptor-type tyrosine-protein phosphatase-like N precursor      | PTPRN    | 2  |          |          | 3.71 |
| IPI00241562 | reelin isoform a                                                 | RELN     | 3  |          |          | 2.89 |
| IPI00018236 | Ganglioside GM2 activator precursor                              | GM2A     | 2  |          |          | 2.86 |
| IPI00026946 | Neuronal pentraxin-2 precursor                                   | NPTX2    | 3  |          |          | 1.73 |
| IPI00220562 | Neuronal pentraxin-1 precursor                                   | NPTX1    | 4  |          |          | 1.72 |
| IPI00019581 | Coagulation factor XII precursor                                 | F12      | 2  |          |          | 1.04 |
| IPI00022822 | Isoform 2 of Collagen alpha-1(XVIII) chain precursor             | COL18A1  | 2  |          |          | 0.99 |
| IPI00176427 | Cell adhesion molecule 4 precursor                               | CADM4    | 2  |          |          | 0.91 |
| IPI00000779 | Isoform 1 of ADAM 22 precursor                                   | ADAM22   | 3  |          |          | 0.78 |
| IPI00022937 | Coagulation factor V                                             | F5       | 3  |          |          | 0.75 |
| IPI00018219 | Transforming growth factor-beta-induced protein ig-h3 precursor  | TGFBI    | 2  |          |          | 0.62 |
| IPI00009619 | Isoform 2 of Cell adhesion molecule 3 precursor                  | CADM3    | 3  |          |          | 0.46 |
| IPI00789234 | Immunoglobulin V-set domain containing protein                   | VSTM2A   | 2  |          |          | 0.46 |

IPI00328520 Isoform 2 of Proline-rich transmembrane protein 2

PRRT2

2

0.24
